# Supplementary material for: The intracellular immune receptor Rx1 regulates the DNA-binding activity of a Golden2-like transcription factor
Source: PubMed Central journal article supplement (PMC5836133; doi:10.1074/jbc.ra117.000485), 2017-12-07
Supplement: supp_RA117.000485_133217_1_supp_23410_mzmjtw.pdf [file supp_RA117.000485_133217_1_supp_23410_mzmjtw.pdf]

#8mers all  
AAAAAAA 2.76945325626  
AAAAAAC 2.10934789419  
AAAAAAG -0.693604288528  
AAAAAAT 3.59896447281  
AAAAACA 0.865741580653  
AAAAACC 1.25806254534  
AAAAACG 0.212310858958  
AAAAACT 0.276540942162  
AAAAAGA 0.493169563669  
AAAAAGC -0.120084977379  
AAAAAGG 0.357562178957  
AAAAAGT 0.972469958586  
AAAAATA 3.59625054772  
AAAAATC 14.6460460797  
AAAAATG 1.25721776003  
AAAAATT 2.98736787521  
AAAAACA 1.41921998086  
AAAAACAC 0.302169668822  
AAAAACAG 0.664096397633  
AAAAACAT 0.595039903298  
AAAAACCA 2.06589268144  
AAAAACCC 0.843569886954  
AAAAACCG 1.38949932534  
AAAAACCT 1.60383327784  
AAAAACGA 0.403243055972  
AAAAACGC 1.93711728883  
AAAAACGG -0.734373021249  
AAAAACGT 0.628485507904  
AAAAACTA 1.0723765383  
AAAAACTC 0.880923930533  
AAAAACTG -0.345028408768  
AAAAACTT -0.220629589564  
AAAAAGAA 1.84296502491  
AAAAAGAC -0.12517878188  
AAAAAGAG -0.328296850182  
AAAAAGAT 3.13834188383  
AAAAAGCA -0.11130987451  
AAAAAGCC -0.117993663246  
AAAAAGCG -0.297841451009  
AAAAAGCT 0.119446944908  
AAAAAGGA 0.904787808671  
AAAAAGGC -0.455171998606  
AAAAAGGG -0.629323497294  
AAAAAGGT -0.279855522154  
AAAAAGTA 0.197201957306  
AAAAAGTC -0.110475544462  
AAAAAGTG 0.782269630035  
AAAAAGTT 1.86721496366  
AAAAATA 2.18654851622  
AAAAATAC 3.23949499236  
AAAAATAG 0.130653157982  
AAAAATAT 4.78573022218  
AAAAATCA 4.92078373929

AAAAATCC 13.8412296734  
AAAAATCG 5.46688961026  
AAAAATCT 13.1795243946  
AAAAATGA 1.22225326698  
AAAAATGC 0.405497472219  
AAAAATGG 0.58184536044  
AAAAATGT 0.805255004636  
AAAAATTA 1.3995682671  
AAAAATTC 1.64715257215  
AAAAATTG 1.15086158949  
AAAAATTT 2.13249480261  
AAAACAAA 0.978506566496  
AAAACAAC 1.60353164348  
AAAACAAG 0.990809798119  
AAAACAAT 1.24332480556  
AAAACACA 0.944545778769  
AAAACACC 0.821674996362  
AAAACACG 0.367606550846  
AAAACACT 1.0986508775  
AAAACAGA 0.76165655478  
AAAACAGC 0.73015536785  
AAAACAGG 0.255865919469  
AAAACAGT 0.962275292281  
AAAACATA 2.20077185703  
AAAACATC 1.06527114105  
AAAACATG -0.195885378218  
AAAACATT -0.0729286012669  
AAAACCAA 2.31040993487  
AAAACCAC 0.840184995314  
AAAACCAG 0.563475462023  
AAAACCAT 1.10965373569  
AAAACCCA 1.9867594039  
AAAACCCC -1.1617591109  
AAAACCCG 0.441468807166  
AAAACCCCT -0.328420222294  
AAAACCGA 0.67421081979  
AAAACCGC 0.258375444152  
AAAACCGG 0.868659906149  
AAAACCGT 0.634374173832  
AAAACCTA 0.324643519644  
AAAACCTC -0.340963924983  
AAAACCTG -0.189976324525  
AAAACCTT 0.215241469388  
AAAACGAA 1.96657917656  
AAAACGAC -0.327578573562  
AAAACGAG -0.131081301033  
AAAACGAT 1.41491868535  
AAAACGCA 1.16482720805  
AAAACGCC -0.882453274239  
AAAACGCG 1.30719731874  
AAAACGCT 0.618771783731  
AAAACGGA -0.0776857462752  
AAAACGGC -0.196603916219  
AAAACGGG -0.839234089075

AAAACGGT 0.181986673346  
AAAACGTA 1.80576310541  
AAAACGTC 0.610419857663  
AAAACGTG 0.218991249734  
AAAACGTT -0.257271629681  
AAAACATA 0.594331559179  
AAAACATC 0.19765519299  
AAAACATG 0.539300278407  
AAAACATTA 1.28280179044  
AAAACATCA 0.451166848443  
AAAACATCC 0.177581609344  
AAAACATCG -0.239137236081  
AAAACATCT -0.252957787856  
AAAACATGA 1.25025037227  
AAAACATGC 0.249871132614  
AAAACATGG 0.569933155681  
AAAACATGT -0.170588083419  
AAAACATTA 1.10971568313  
AAAACATTC 0.364722204958  
AAAACATTG 0.142572158662  
AAAACATTT -0.236907912466  
AAAAGAAA 1.52901096692  
AAAAGAAC -0.0988717699842  
AAAAGAAG -0.659383164733  
AAAAGAAT 3.24023052017  
AAAAGACA 1.03649668691  
AAAAGACC -0.265672434108  
AAAAGACG 1.23224483979  
AAAAGACT -0.108628883502  
AAAAGAGA -0.0582342508231  
AAAAGAGC -0.813216165222  
AAAAGAGG 0.57436409646  
AAAAGAGT 1.74025408207  
AAAAGATA 1.71863730149  
AAAAGATC 4.46836016814  
AAAAGATG -0.477042319328  
AAAAGATT 7.40169393336  
AAAAGCAA 0.126300108918  
AAAAGCAC -0.274484914545  
AAAAGCAG 0.329272849053  
AAAAGCAT 0.235153519208  
AAAAGCCA 0.00365097810308  
AAAAGCCC 0.211001859936  
AAAAGCCG -0.310293931523  
AAAAGCCT 0.430727069185  
AAAAGCGA 0.123713738047  
AAAAGCGC 0.950026689411  
AAAAGCGG 0.160033494659  
AAAAGCGT -0.431731297268  
AAAAGCTA 0.108540797904  
AAAAGCTC 0.102681145333  
AAAAGCTG 2.5130533342  
AAAAGCTT -0.0697601335861  
AAAAGGAA 0.627545318311

AAAAGGAC -0.0183777398645  
AAAAGGAG -0.822589831941  
AAAAGGAT 0.97861216466  
AAAAGGCA 0.029414839047  
AAAAGGCC -1.5398436657  
AAAAGGCG 0.422536415559  
AAAAGGCT -0.336781819482  
AAAAGGGA -0.0302078708028  
AAAAGGGC -1.40040416544  
AAAAGGGG -0.18084103782  
AAAAGGGT -0.324750163334  
AAAAGGTA 0.888294368717  
AAAAGGTC -0.295586511999  
AAAAGGTG -1.55108333562  
AAAAGGTT -0.270582225967  
AAAAGTAA 0.960692365348  
AAAAGTAC 0.559207623359  
AAAAGTAG 1.65434108875  
AAAAGTAT 0.518674656835  
AAAAGTCA -0.815525732985  
AAAAGTCC -0.205572441468  
AAAAGTCG 0.50865720725  
AAAAGTCT -0.209391226554  
AAAAGTGA 0.0820346132339  
AAAAGTGC 0.0960786462722  
AAAAGTGG 0.974445742054  
AAAAGTGT -0.932476222291  
AAAAGTTA 0.683495878148  
AAAAGTTC -0.353030344882  
AAAAGTTG 0.766696253291  
AAAAGTTT -0.1763410923  
AAAATAAA 1.58301920014  
AAAATAAC 2.97774066835  
AAAATAAG 1.35094632439  
AAAATAAT 1.88711237611  
AAAATACA 3.23949499236  
AAAATACC 2.15776569787  
AAAATACG 2.93421226876  
AAAATACT 1.71697360765  
AAAATAGA 0.626175678759  
AAAATAGC 0.36346156153  
AAAATAGG 1.59807295027  
AAAATAGT 1.16415702564  
AAAATATA 4.02684378953  
AAAATATC 8.25900438933  
AAAATATG 3.47243121151  
AAAATATT 5.18755266919  
AAAATCAA 4.93142014049  
AAAATCAC 5.81346644359  
AAAATCAG 6.82064604817  
AAAATCAT 5.03520170233  
AAAATCCA 15.8149926617  
AAAATCCC 10.3171656646  
AAAATCCG 10.9053973615

AAAATCCT 9.28057775552  
AAAATCGA 4.51881727102  
AAAATCGC 7.0619893449  
AAAATCGG 6.026409846  
AAAATCGT 8.45443705462  
AAAATCTA 13.7203487891  
AAAATCTC 12.9056121671  
AAAATCTG 18.8565744774  
AAAATCTT 10.8243026765  
AAAATGAA 1.80775692421  
AAAATGAC -0.109410675849  
AAAATGAG 1.77326134974  
AAAATGAT 1.01266731114  
AAAATGCA 0.682851572519  
AAAATGCC 0.0228776853845  
AAAATGCG 0.917408618931  
AAAATGCT 0.59220809511  
AAAATGGA -0.590246164867  
AAAATGGC 0.0944230552567  
AAAATGGG 0.398234200488  
AAAATGGT 0.38666806496  
AAAATGTA 1.47332414111  
AAAATGTC -0.0486912088312  
AAAATGTG 1.09381871597  
AAAATGTT 1.38039122232  
AAAATTAA 2.00089753431  
AAAATTAC 2.78208765836  
AAAATTAG 0.545323033092  
AAAATTAT 2.40307911963  
AAAATTCA 1.19208120546  
AAAATTCC 2.90594855425  
AAAATTCT 3.50143594284  
AAAATTGA 1.64531192297  
AAAATTGC 1.88701252834  
AAAATTGG 0.837940250185  
AAAATTGT 1.28023005694  
AAAATTTA 3.34202401361  
AAAATTTT 4.00362578531  
AAAATTTG 2.6120228609  
AAAATTTT 5.22084954766  
AAACAAAA 1.03742825091  
AAACAAAC 0.811167456289  
AAACAAAG 0.533015619364  
AAACAAAT 2.0739578719  
AAACAACA 1.06011251392  
AAACAACC 0.0780571695201  
AAACAACG 1.19178296906  
AAACAACT 0.548315590961  
AAACAAGA 0.0583670326728  
AAACAAGC -0.256632290303  
AAACAAGG 1.048639953  
AAACAAGT 0.354382733249  
AAACAATA 2.10855799901

AAACAATC 2.72201432665  
AAACAATG 0.139750544356  
AAACAATT 0.454211159867  
AAACACAA 0.62259265987  
AAACACAC 0.718966405962  
AAACACAG 0.0713132630169  
AAACACAT 0.635771519833  
AAACACCA 0.128319543112  
AAACACCC 0.597477286661  
AAACACCG 0.482229698439  
AAACACCT 0.300524010307  
AAACACGA 0.898711470759  
AAACACGC 0.194712297624  
AAACACGG -0.253570989075  
AAACACGT 1.14378964909  
AAACACTA 2.1078026062  
AAACACTC 0.276958368568  
AAACACTG 0.121948628143  
AAACACTT 0.428108286996  
AAACAGAA 0.645671609082  
AAACAGAC 0.146103162614  
AAACAGAG -0.514116684601  
AAACAGAT 4.24193574864  
AAACAGCA 1.34442302396  
AAACAGCC -0.872589255649  
AAACAGCG -0.284678796706  
AAACAGCT 0.974787106416  
AAACAGGA -0.556134821341  
AAACAGGC -0.203905872425  
AAACAGGG -0.252729601725  
AAACAGGT -0.430288993633  
AAACAGTA 0.67245616515  
AAACAGTC -0.740938404124  
AAACAGTG -0.0166962720712  
AAACAGTT -0.197798952866  
AAACATAA 2.01366262721  
AAACATAC 1.67574615023  
AAACATAG 1.03717340386  
AAACATAT 2.30051350496  
AAACATCA 1.22188262788  
AAACATCC 0.2621124168  
AAACATCG 0.385561898055  
AAACATCT 0.131187944723  
AAACATGA 0.840367439666  
AAACATGC -0.0819023541474  
AAACATGG -0.416223265923  
AAACATGT -0.399202619294  
AAACATTA 1.16912641251  
AAACATTC 0.529570871338  
AAACATTG 0.676609780058  
AAACATTT 0.509988946471  
AAACCAAA 2.23917012008  
AAACCAAC 0.778943810635  
AAACCAAG 0.0573168014287

AAACCAAT 1.2442699614  
AAACCACA 0.827436630836  
AAACCACC -0.532881269225  
AAACCACG 0.913783256224  
AAACCACT -0.14873788908  
AAACCAGA 1.84067349247  
AAACCAGC -0.0265453919095  
AAACCAGG -0.032583829491  
AAACCAGT 0.749908497662  
AAACCATA 1.11348402157  
AAACCATC -0.143501892992  
AAACCATG -0.394758870816  
AAACCATT 1.2354441505  
AAACCCAA 0.694313678174  
AAACCCAC 0.612760007072  
AAACCCAG 1.21676895838  
AAACCCAT 0.287615941676  
AAACCCCA -0.517618936577  
AAACCCCC -1.50390866279  
AAACCCCG -0.738060070012  
AAACCCCT -0.577044826087  
AAACCCGA -0.00390870035463  
AAACCCGC 0.98390095983  
AAACCCGG -0.414454758059  
AAACCCGT 0.0770511117653  
AAACCCCTA 0.61197899887  
AAACCCCTC -0.40585190566  
AAACCCCTG -0.0833227017285  
AAACCCCTT -0.333912110963  
AAACCGAA 1.53060434912  
AAACCGAC -0.294456297987  
AAACCGAG -0.297505837043  
AAACCGAT 1.56370858936  
AAACCGCA -0.68070824345  
AAACCGCC -0.557150550215  
AAACCGCG -0.0532162469841  
AAACCGCT -0.244257440123  
AAACCGGA 0.811453146371  
AAACCGGC 0.953807051403  
AAACCGGG -0.0456445449731  
AAACCGGT 0.402815174302  
AAACCGTA 0.00834695981842  
AAACCGTC -0.162058679248  
AAACCGTG -0.191047727678  
AAACCGTT 0.662113818244  
AAACCTAA -0.465142660885  
AAACCTAC 0.0601156755358  
AAACCTAG -0.245879051531  
AAACCTAT 0.0673546387778  
AAACCTCA -0.709389907126  
AAACCTCC -1.50702694521  
AAACCTCG 0.77119436914  
AAACCTCT -0.535604342669  
AAACCTGA 0.112361935425

AAACCTGC -0.922050233275  
AAACCTGG -0.178349025704  
AAACCTGT 0.129248754678  
AAACCTTA 0.39498418175  
AAACCTTC -0.22060763351  
AAACCTTG 0.488740713943  
AAACCTTT 1.08332842708  
AAACGAAA 2.23752942782  
AAACGAAC -0.0391392798651  
AAACGAAG 1.16794705875  
AAACGAAT 2.06759950325  
AAACGACA 1.35075865241  
AAACGACC -0.327578573562  
AAACGACG -0.809702151074  
AAACGACT 0.712431604734  
AAACGAGA 2.14865759485  
AAACGAGC -0.728904395542  
AAACGAGG 0.359778694873  
AAACGAGT 1.07432566085  
AAACGATA 1.43099286923  
AAACGATC 2.07659181422  
AAACGATG 0.391792451108  
AAACGATT 1.96468677383  
AAACGCAA 2.53091562956  
AAACGCAC -0.258686226867  
AAACGCAG 0.200548164471  
AAACGCAT 0.609157645946  
AAACGCCA -0.487454455119  
AAACGCCC -0.744395959847  
AAACGCCG -0.599617479151  
AAACGCCT 0.0726802887528  
AAACGCGA 0.512059872839  
AAACGCGC 0.0497058921786  
AAACGCGG -0.751738168819  
AAACGCGT 0.713263843729  
AAACGCTA 0.076128434739  
AAACGCTC -0.220831898918  
AAACGCTG 0.305342841372  
AAACGCTT 0.54793501936  
AAACGGAA 0.442046199107  
AAACGGAC -0.221025321297  
AAACGGAG -0.497624028792  
AAACGGAT 2.35490440083  
AAACGGCA -0.0598088135446  
AAACGGCC -0.352912723165  
AAACGGCG 0.486583270267  
AAACGGCT -0.324521977203  
AAACGGGA 0.0592275008798  
AAACGGGC -0.630997646403  
AAACGGGG 0.229289161769  
AAACGGGT -0.382364155635  
AAACGGTA 0.807783871557  
AAACGGTC -0.578824311978  
AAACGGTG 0.587711286169



AAACGGTT 0.148880342048  
AAACGTAA 1.66353178835  
AAACGTAC -0.0897926803214  
AAACGTAG -0.10702478466  
AAACGTAT 2.3733744084  
AAACGTCA 0.306710912634  
AAACGTCC 0.377503242134  
AAACGTCCG -0.227892599913  
AAACGTCT -0.48296940835  
AAACGTGA 1.04671827552  
AAACGTGC 0.356032051106  
AAACGTGG 0.418211595707  
AAACGTGT -0.0790093826666  
AAACGTTA 0.992522893086  
AAACGTTC -0.535813970708  
AAACGTTG -0.212805392933  
AAACGTTT 0.150701648995  
AAACTAAA 1.66004286684  
AAACTAAC 1.39053282817  
AAACTAAG 1.34221382672  
AAACTAAT 0.545596961003  
AAACTACA 0.570190877933  
AAACTACC -0.452170292382  
AAACTACG -0.0406158244888  
AAACTACT 2.14682949198  
AAACTAGA 1.08147444744  
AAACTAGC 0.203644490831  
AAACTAGG 0.669751127035  
AAACTAGT 0.500354420921  
AAACTATA 0.122655926736  
AAACTATC 0.233481199771  
AAACTATG 0.12596266528  
AAACTATT 1.0371713128  
AAACTCAA 1.85320778542  
AAACTCAC -0.0619534495222  
AAACTCAG -0.112307568054  
AAACTCAT 0.575069826764  
AAACTCCA -0.0401957842675  
AAACTCCC -0.084050910849  
AAACTCCG 0.192458926904  
AAACTCCT -0.363586240551  
AAACTCGA 0.133322909582  
AAACTCGC 0.0559320017444  
AAACTCGG 0.497109107052  
AAACTCGT 0.590789838582  
AAACTCTA -0.232854406709  
AAACTCTC -0.0580199179162  
AAACTCTG -0.164931785728  
AAACTCTT 0.49417013241  
AAACTGAA 0.388077173132  
AAACTGAC 0.53945005006  
AAACTGAG -0.402455513229  
AAACTGAT 1.9784093075  
AAACTGCA 0.714286891287

AAACTGCC -0.42867470091  
AAACTGCG 0.13356364203  
AAACTGCT -0.396477193414  
AAACTGGA 1.15066712158  
AAACTGGC -0.109290963079  
AAACTGGG 0.262004466201  
AAACTGGT -0.220402971722  
AAACTGTA -0.0449053578257  
AAACTGTC -0.268682765924  
AAACTGTG 0.123397989081  
AAACTGTT -0.1580888156  
AAACTTAA 2.04176820586  
AAACTTAC 1.11262825823  
AAACTTAG -0.220629589564  
AAACTTAT 1.43621292104  
AAACTTCA 0.72380379512  
AAACTTCC -0.514364474352  
AAACTTCG 0.266355424213  
AAACTTCT 0.268530380455  
AAACTTGA 0.643048644788  
AAACTTGC 0.392159953629  
AAACTTGG -0.596479593117  
AAACTTGT 0.291344288731  
AAACTTTA 0.515683928638  
AAACTTTC 0.353354980822  
AAACTTTG 0.0335527710594  
AAAGAAAA 1.08769402246  
AAAGAAAC 0.203141854026  
AAAGAAAG 0.445292819884  
AAAGAAAT 2.22301752172  
AAAGAACA -0.326062560317  
AAAGAACC -0.0707165288381  
AAAGAACG 1.25256412214  
AAAGAACT 0.0617974047107  
AAAGAAGA -0.414531342866  
AAAGAAGC -0.250312083363  
AAAGAAGG -0.685837073085  
AAAGAAGT 0.646890692836  
AAAGAATA 1.88898334556  
AAAGAATC 9.93290989037  
AAAGAATG 1.13606268641  
AAAGAATT 0.780100946951  
AAAGACAA 1.3056585653  
AAAGACAC 0.962558629928  
AAAGACAG 0.344913400867  
AAAGACAT 0.747987342947  
AAAGACCA -0.0481543310374  
AAAGACCC -1.13829122588  
AAAGACCG 0.445292819884  
AAAGACCT 0.164223441608  
AAAGACGA 2.76261107028  
AAAGACGC -0.207775888304  
AAAGACGG -0.0381496891507  
AAAGACGT 0.563324383462

AAAGACTA -0.15386436628  
AAAGACTC -0.697947405091  
AAAGACTG -0.277338417405  
AAAGACTT -0.949874826705  
AAAGAGAA 0.816207416182  
AAAGAGAC -0.539072353657  
AAAGAGAG -0.626143267441  
AAAGAGAT 1.7311906753  
AAAGAGCA -0.598970559707  
AAAGAGCC -1.33233490938  
AAAGAGCG -0.425638753697  
AAAGAGCT -0.765716072314  
AAAGAGGA 0.359431057353  
AAAGAGGC -0.643872780953  
AAAGAGGG -0.666272138021  
AAAGAGGT 1.32338206703  
AAAGAGTA 1.0909369839  
AAAGAGTC 0.133418575245  
AAAGAGTG -0.14190929494  
AAAGAGTT 1.90381413719  
AAAGATAA 2.27619717529  
AAAGATAC 2.31713894262  
AAAGATAG 0.645790537707  
AAAGATAT 5.04968903855  
AAAGATCA 2.55147668988  
AAAGATCC 4.68808014976  
AAAGATCG 4.60567855677  
AAAGATCT 8.34578516954  
AAAGATGA 0.299934856195  
AAAGATGC 0.443362255432  
AAAGATGG 0.43682353348  
AAAGATGT 0.0592836979225  
AAAGATTA 5.30363484884  
AAAGATTC 6.35909111104  
AAAGATTG 4.60528177951  
AAAGATTT 11.5162466691  
AAAGCAAA 0.67049815563  
AAAGCAAC -0.0616965114154  
AAAGCAAG 0.124746979487  
AAAGCAAT 4.39298033029  
AAAGCACA 0.819808209019  
AAAGCACC -0.504005660406  
AAAGCACG 0.122140482233  
AAAGCACT -0.527981409866  
AAAGCAGA 2.89339125972  
AAAGCAGC -0.751734770858  
AAAGCAGG -1.19856974215  
AAAGCAGT -0.743985590745  
AAAGCATA 0.559374907579  
AAAGCATC 0.180453147534  
AAAGCATG 0.0350617270008  
AAAGCATT 0.615991206336  
AAAGCCAA -0.139980298777  
AAAGCCAC 0.144427445215

AAAGCCAG -0.691072285028  
AAAGCCAT -0.611962793211  
AAAGCCCA -1.35417987609  
AAAGCCCC -1.49535939362  
AAAGCCCG -0.880644774991  
AAAGCCCT -0.034302152089  
AAAGCCGA 1.08829258631  
AAAGCCGC -0.840417624932  
AAAGCCGG -0.155255439123  
AAAGCCGT -0.685619080835  
AAAGCCTA 0.263253086075  
AAAGCCTC -0.272101637172  
AAAGCCTG 0.439113236242  
AAAGCCTT -0.215547808616  
AAAGCGAA -0.203602669776  
AAAGCGAC -0.128069139545  
AAAGCGAG -0.349167647688  
AAAGCGAT 0.732940650115  
AAAGCGCA -0.424732020948  
AAAGCGCC -0.734812142327  
AAAGCGCG 0.26288819737  
AAAGCGCT 0.138263544469  
AAAGCGGA 1.22582347818  
AAAGCGGC -1.64272163137  
AAAGCGGG 0.229487027635  
AAAGCGGT 0.709178449417  
AAAGCGTA -0.182990640048  
AAAGCGTC 0.0655294111079  
AAAGCGTG 0.0902121977795  
AAAGCGTT -0.0415625486218  
AAAGCTAA 0.218897675123  
AAAGCTAC -0.720901413901  
AAAGCTAG 0.115670765022  
AAAGCTAT 0.953936958055  
AAAGCTCA -0.2558413496  
AAAGCTCC -0.861668732658  
AAAGCTCG -0.689553396586  
AAAGCTCT -0.350950270159  
AAAGCTGA -0.518012315876  
AAAGCTGC 0.238453200449  
AAAGCTGG 0.3050981882  
AAAGCTGT 0.679312988502  
AAAGCTTA 1.10327550204  
AAAGCTTC -1.06377708386  
AAAGCTTG -0.479383775645  
AAAGCTTT -0.213573332056  
AAAGGAAA -0.479484668941  
AAAGGAAC -0.28762639694  
AAAGGAAG -1.27743667184  
AAAGGAAT 2.65644361725  
AAAGGACA -0.141986663892  
AAAGGACC -0.155037969637  
AAAGGACG 0.351068937402  
AAAGGACT 0.17592131346

AAAGGAGA -0.385907444522  
AAAGGAGC -0.872677341247  
AAAGGAGG -0.42862712946  
AAAGGAGT -0.747731711748  
AAAGGATA 1.80598423424  
AAAGGATC 2.45946435706  
AAAGGATG 0.397946157972  
AAAGGATT 4.17464619388  
AAAGGCAA 0.141096920946  
AAAGGCAC -1.25841697879  
AAAGGCAG -0.857375017216  
AAAGGCAT -0.611825306493  
AAAGGCCA -1.00854663032  
AAAGGCCC -1.78011712757  
AAAGGCCG -1.53394872661  
AAAGGCCT -1.45768019134  
AAAGGCCA -0.999330053935  
AAAGGCCG -0.0514438183962  
AAAGGCCG -0.906773001876  
AAAGGCCG -0.152047502821  
AAAGGCTA -0.412466689656  
AAAGGCTC -1.31916519778  
AAAGGCTG -0.848050490236  
AAAGGCTT -1.18686742681  
AAAGGGAA -0.154899437392  
AAAGGGAC -0.593761747304  
AAAGGGAG -1.36632366494  
AAAGGGAT 1.84853297562  
AAAGGGCA -0.0726763680288  
AAAGGGCC -1.45840369559  
AAAGGGCG -0.899977080436  
AAAGGGCT -0.974278980597  
AAAGGGGA -0.454530045411  
AAAGGGGC -1.28521983156  
AAAGGGGG -0.597287262242  
AAAGGGGT -0.242723391548  
AAAGGGTA -0.255357009506  
AAAGGGTC -1.06323158048  
AAAGGGTG -1.0465410588  
AAAGGGTT -0.5573481547  
AAAGGTAA 0.193918743105  
AAAGGTAC 0.493011427805  
AAAGGTAG -0.372438973753  
AAAGGTAT 0.63849668433  
AAAGGTCA -1.42368673091  
AAAGGTCC -0.991622172113  
AAAGGTCC -0.248510118655  
AAAGGTCT 0.0802112152351  
AAAGGTGA 0.601933058691  
AAAGGTGC -0.963193264438  
AAAGGTGG -1.08433709865  
AAAGGTGT -0.103178031743  
AAAGGTTA -0.0342974472203  
AAAGGTTC 0.00657662228319

AAAGGTTG -0.0709760807608  
AAAGTAAA 1.57590726835  
AAAGTAAC 0.189152449741  
AAAGTAAG 1.22044372221  
AAAGTAAT 2.15689268335  
AAAGTACA 1.08174576153  
AAAGTACC -0.446954684058  
AAAGTACG 1.26951210468  
AAAGTACT -0.0183777398645  
AAAGTAGA -0.0469023132028  
AAAGTAGC 0.0895422767545  
AAAGTAGG 0.838875473528  
AAAGTAGT -0.0817308878219  
AAAGTATA 1.13101671474  
AAAGTATC 2.87441234219  
AAAGTATG 0.656817443008  
AAAGTATT 0.3347054041  
AAAGTCAA -0.192319871896  
AAAGTCAC -0.191453391912  
AAAGTCAG -0.15824616732  
AAAGTCAT -0.0860355812912  
AAAGTCCA -1.12364889037  
AAAGTCCC -1.09319009324  
AAAGTCCG -0.129535228905  
AAAGTCCT -0.591421336513  
AAAGTCGA 0.07879348147  
AAAGTCGC -0.24491298516  
AAAGTCGG -0.550095338233  
AAAGTCGT 0.583366601316  
AAAGTCTA -0.659186605774  
AAAGTCTC -0.363089354141  
AAAGTCTG 0.0951622424041  
AAAGTCTT -0.786096517951  
AAAGTGAA 1.33861094284  
AAAGTGAC -0.210628084256  
AAAGTGAG -0.145492836592  
AAAGTGAT 1.1940758084  
AAAGTGCA -0.368330055098  
AAAGTGCC -0.612164057038  
AAAGTGCG 0.10372196684  
AAAGTGCT -0.440285794072  
AAAGTGGA 2.40907887274  
AAAGTGGC -0.103908070535  
AAAGTGGG -0.521056365918  
AAAGTGGT 1.53528647761  
AAAGTGTA 1.33889611015  
AAAGTGTC 0.574056188943  
AAAGTGTG -1.2251159182  
AAAGTGTT 0.615803011588  
AAAGTTAA 0.10372196684  
AAAGTTAC 0.407779856296  
AAAGTTAG 0.79421895098  
AAAGTTAT 2.14188990262  
AAAGTTCA 0.872301474515

AAAGTTCC -0.302502668973  
AAAGTTCG 0.631634110584  
AAAGTTCT 0.209719521836  
AAAGTTGA 0.815708961483  
AAAGTTGC 0.523056457874  
AAAGTTGG 0.528450328445  
AAAGTTGT -0.516469118946  
AAAGTTTA 0.471458162956  
AAAGTTTC 0.0624566090904  
AAAGTTTG 0.0809294918551  
AAATAAAA 3.3088282898  
AAATAAAC 1.98495639367  
AAATAAAG 1.26827655389  
AAATAAAT 2.3995975168  
AAATAACA 2.01635355072  
AAATAACC 2.33864176082  
AAATAACG 1.13207870815  
AAATAACT 1.88088365273  
AAATAAGA 1.43314168731  
AAATAAGC 0.0584318553081  
AAATAAGG 1.48156210481  
AAATAAGT 0.990765363248  
AAATAATA 2.30375777331  
AAATAATC 2.36323123427  
AAATAATG 0.80521788845  
AAATAATT 1.8079247312  
AAATACAA 2.9095577113  
AAATACAC 1.86779104869  
AAATACAG 2.37680216662  
AAATACAT 2.49000575078  
AAATACCA 0.315772751112  
AAATACCC 1.65832140766  
AAATACCG 1.89571862647  
AAATACCT 2.5817438943  
AAATACGA 1.12277064822  
AAATACGC 1.58143444353  
AAATACGG 1.41833860212  
AAATACGT 2.93421226876  
AAATACTA 1.28797871429  
AAATACTC 1.20948529889  
AAATACTG 1.8261059121  
AAATACTT 0.509806240737  
AAATAGAA 0.91832685247  
AAATAGAC 0.693649768925  
AAATAGAG -0.265817239511  
AAATAGAT 2.03395603278  
AAATAGCA 0.215279631101  
AAATAGCC 0.595978524602  
AAATAGCG 0.53155867836  
AAATAGCT 0.866137051005  
AAATAGGA 0.702192764939  
AAATAGGC 0.681057972022  
AAATAGGG -0.789719528223  
AAATAGGT 2.03056800456

AAATAGTA 0.170324872154  
AAATAGTC 0.221884221214  
AAATAGTG -0.1875057457  
AAATAGTT 1.08903046655  
AAATATAA 1.92062593993  
AAATATAC 2.54860201511  
AAATATAG 2.4461291909  
AAATATAT 4.86374687755  
AAATATCA 5.69407099085  
AAATATCC 11.5516225768  
AAATATCG 6.30154743039  
AAATATCT 8.41548518536  
AAATATGA 3.08855313368  
AAATATGC 2.72441015034  
AAATATGG 2.55174565154  
AAATATGT 2.84708960142  
AAATATTA 4.44823901305  
AAATATTC 4.96559944323  
AAATATTG 3.61282109524  
AAATATTT 5.30178897202  
AAATCAAA 3.80709453317  
AAATCAAC 4.79172134969  
AAATCAAG 3.14975014487  
AAATCAAT 4.03510004993  
AAATCACA 4.60786449104  
AAATCACC 4.19095353014  
AAATCACG 5.88678868553  
AAATCACT 2.86301479779  
AAATCAGA 3.8663455584  
AAATCAGC 5.05115172995  
AAATCAGG 4.55042693131  
AAATCAGT 4.42030463935  
AAATCATA 5.74640376805  
AAATCATC 2.42024509443  
AAATCATG 3.42310432264  
AAATCATT 3.08682304891  
AAATCCAA 10.4328390434  
AAATCCAC 12.6406695104  
AAATCCAG 6.93778630051  
AAATCCAT 8.12032524812  
AAATCCCA 6.71116218547  
AAATCCCC 7.95805589531  
AAATCCCG 11.1884041002  
AAATCCCT 5.2154954071  
AAATCCGA 8.60642391691  
AAATCCGC 9.14983076154  
AAATCCGG 11.1857840111  
AAATCCGT 5.3814868338  
AAATCCTA 7.72129984555  
AAATCCTC 6.8162702589  
AAATCCTG 10.4289708572  
AAATCCTT 7.06150918691  
AAATCGAA 2.05875147492  
AAATCGAC 5.75394776361



AAATCGAG 3.74742634293  
AAATCGAT 3.58713460325  
AAATCGCA 7.43717099572  
AAATCGCC 5.37918510749  
AAATCGCG 9.07684805429  
AAATCGCT 3.48682889384  
AAATCGGA 4.70758392153  
AAATCGGC 4.49749898823  
AAATCGGG 4.7880502452  
AAATCGGT 4.15874086252  
AAATCGTA 6.29800283459  
AAATCGTC 6.43624651406  
AAATCGTG 8.17302735751  
AAATCGTT 3.02521070237  
AAATCTAA 8.53513914449  
AAATCTAC 11.8438095598  
AAATCTAG 15.2229042794  
AAATCTAT 10.9442742143  
AAATCTCA 10.3394230915  
AAATCTCC 9.20305772517  
AAATCTCG 14.9478788277  
AAATCTCT 8.0419797747  
AAATCTGA 14.0591879431  
AAATCTGC 11.0335281871  
AAATCTGG 11.2066563769  
AAATCTGT 10.505689753  
AAATCTTA 9.20994068668  
AAATCTTC 8.76117619647  
AAATCTTG 10.6001731874  
AAATGAAA 2.82759837596  
AAATGAAC 1.23065825352  
AAATGAAG -0.0322714784863  
AAATGAAT 3.5576985923  
AAATGACA 0.208644197959  
AAATGACC -0.61738254056  
AAATGACG 0.164496062611  
AAATGACT 0.728649287107  
AAATGAGA 1.00365670346  
AAATGAGC -0.868138449869  
AAATGAGG 0.909971789822  
AAATGAGT 1.79409137172  
AAATGATA 2.50053289447  
AAATGATC 0.74221865117  
AAATGATG 0.546546821715  
AAATGATT 3.18753128598  
AAATGCAA 1.52352090793  
AAATGCAC 0.423750794444  
AAATGCAG -0.336771364218  
AAATGCAT 1.93711937988  
AAATGCCA -0.527376572858  
AAATGCCC 0.664284330999  
AAATGCCG 0.359094136479  
AAATGCCT 0.027699653028  
AAATGCGA 1.99240890567

AAATGCGC 1.4716201945  
AAATGCGG 0.411851397384  
AAATGCGT 0.951751285167  
AAATGCTA 1.44900336795  
AAATGCTC 0.409869079376  
AAATGCTG 0.327459906318  
AAATGCTT 0.428168143381  
AAATGGAA -0.238866183368  
AAATGGAC -0.367506964459  
AAATGGAG -1.25717750727  
AAATGGAT 1.56726494733  
AAATGGCA 0.178423258076  
AAATGGCC 0.0757980484044  
AAATGGCG 0.660540301049  
AAATGGCT -0.531109102018  
AAATGGGA -0.236615687845  
AAATGGGC -0.675502044863  
AAATGGGG 0.35998492495  
AAATGGGT 0.599453592892  
AAATGGTA 1.92049551051  
AAATGGTC 0.0969534904669  
AAATGGTG -0.0929674211604  
AAATGGTT 0.677283360425  
AAATGTAA 1.60321380346  
AAATGTAC 0.315179676275  
AAATGTAG 1.32664855281  
AAATGTAT 0.715694692552  
AAATGTCA 1.05543430615  
AAATGTCC -0.545591210608  
AAATGTCCG -0.184429022959  
AAATGTCT 0.825566445532  
AAATGTGA 1.17500383903  
AAATGTGC 0.557451139048  
AAATGTGG 0.821748705972  
AAATGTGT 0.496837008812  
AAATGTTA 0.621022017873  
AAATGTTC 0.489083385212  
AAATGTTG 1.03514482131  
AAATTAAG 1.158343899  
AAATTAAC 2.06210839873  
AAATTAAG 2.7929621782  
AAATTAAT 0.546699991329  
AAATTACA 3.48215225437  
AAATTACC 2.47842288683  
AAATTACG 4.89480789787  
AAATTACT 2.68639272027  
AAATTAGA 1.21162444585  
AAATTAGC 0.641789831032  
AAATTAGG 0.469747420425  
AAATTAGT 0.763471065804  
AAATTATA 3.32976051199  
AAATTATC 1.6863389007  
AAATTATG 1.24332480556  
AAATTATT 2.86860182935

AAATTCAA 1.59307637972  
AAATTCAC 2.24979711154  
AAATTCAG 2.36316144538  
AAATTCAT 1.51995383331  
AAATTCCA 1.75208264472  
AAATTCCC 5.72963718433  
AAATTCCG 2.07469235418  
AAATTCCT 4.24716128947  
AAATTCGA 2.47262073821  
AAATTCGC 4.04077176914  
AAATTCGG 2.29743599808  
AAATTCGT 3.48916067904  
AAATTCTA 2.76641704767  
AAATTCTC 5.06286894404  
AAATTCTG 4.03654183081  
AAATTCTT 1.3043208143  
AAATTGAA 2.23956715872  
AAATTGAC 0.412331032609  
AAATTGAG 0.753519223  
AAATTGAT 1.4303825432  
AAATTGCA 1.55617923117  
AAATTGCC 2.76026177251  
AAATTGCG 4.54084206827  
AAATTGCT 3.06573817988  
AAATTGGA 0.568408778226  
AAATTGGC 0.481505671424  
AAATTGGG 0.511052246795  
AAATTGGT 0.865868350726  
AAATTGTA 1.2003981064  
AAATTGTC 0.920253496198  
AAATTGTG 2.10752397342  
AAATTGTT 1.81228614447  
AAATTTAA 3.0152342897  
AAATTTAC 2.06154747383  
AAATTTAG 1.92183665947  
AAATTTAT 2.2196551089  
AAATTTCA 3.81845835935  
AAATTTCC 4.00362578531  
AAATTTCG 3.26021209749  
AAATTTCT 2.02234964448  
AAATTTGA 1.97608510237  
AAATTTGC 3.2381311032  
AAATTTGG 1.93271300897  
AAATTTGT 2.31307341331  
AAATTTTA 3.11334543924  
AAATTTTC 4.68700796246  
AAATTTTG 3.82073656132  
AACAAAAA 0.894041888584  
AACAAAAC 0.479485191704  
AACAAAAG -0.147472279402  
AACAAAAT 3.74586537205  
AACAAACA 1.80897287139  
AACAAACC 0.063335374009  
AACAAACG 0.659625988234

AACAAACT 0.243477477447  
AACAAAGA 0.801588605019  
AACAAAGC 1.0617273294  
AACAAAGG 0.0833122464647  
AACAAAGT 0.122044555188  
AACAAATA 2.80712540124  
AACAAATC 4.03405373941  
AACAAATG 1.05663666148  
AACAAATT 1.32677192492  
AACAACAA 1.44423158557  
AACAACAC 0.288993422676  
AACAACAG 0.595448442729  
AACAACAT 0.563852635663  
AACAACCA -0.0150328396078  
AACAACCC -0.387767697325  
AACAACCG -0.455797223378  
AACAACCT -0.430288993633  
AACAACGA 0.906902385765  
AACAACGC 0.656721515963  
AACAACGG 0.144839905371  
AACAACGT 0.856721563231  
AACAACTA 0.577677892307  
AACAACTC -0.43416031642  
AACAACTG -0.23244456037  
AACAACTT 0.0659209607355  
AACAAAGAA 1.40911522982  
AACAAAGAC -0.256060910138  
AACAAAGAG -0.339383611867  
AACAAAGAT 3.58855730327  
AACAAAGCA -0.0508321854665  
AACAAAGCC -0.330717766504  
AACAAAGCG -0.0239940461718  
AACAAAGCT -0.567421801327  
AACAAAGGA 0.696467201125  
AACAAAGGC 0.118322481292  
AACAAAGGG -0.08112709634  
AACAAAGGT 0.456184852282  
AACAAAGTA 0.163250579316  
AACAAAGTC -0.0265111509208  
AACAAAGTG -0.509565508289  
AACAAAGTT 0.101907455815  
AACAAATAA 1.12400881283  
AACAAATAC 1.3593403329  
AACAAATAG 2.21164899068  
AACAAATAT 2.69768911  
AACAAATCA 1.34478477608  
AACAAATCC 3.76701166575  
AACAAATCG 2.34934272328  
AACAAATCT 2.99168119427  
AACAAATGA -0.0487021868581  
AACAAATGC -0.223988604427  
AACAAATGG -0.461147704605  
AACAAATGT 0.341084421898  
AACAAATTA 1.1525286813

AACAATTC 1.13606268641  
AACAATTG 0.604884056886  
AACACAAA 0.846679282395  
AACACAAC -0.269184357203  
AACACAAG 0.765817226991  
AACACAAT 1.92025190287  
AACACACA -0.218063867839  
AACACACC 0.668416512617  
AACACACG 0.211462414304  
AACACACT 0.318698918055  
AACACAGA 1.07786868835  
AACACAGC 0.0386980677346  
AACACAGG 0.677144044036  
AACACAGT 0.222049414382  
AACACATA 0.0750933636273  
AACACATC 0.0653325907677  
AACACATG -0.388047375631  
AACACATT 1.01027070331  
AACACCAA -0.146663826133  
AACACCAC -0.0761514363193  
AACACCAG -0.466048348108  
AACACCAT -0.935553729177  
AACACCCA 0.00901792636987  
AACACCCC -0.170692636056  
AACACCCG -0.586954325073  
AACACCCCT -0.425070771493  
AACACCGA 1.56457114862  
AACACCGC -0.00414577346026  
AACACCGG -0.596951125512  
AACACCGT 0.410343486969  
AACACCTA 0.409069251699  
AACACCTC 0.252072488398  
AACACCTG 0.498729672934  
AACACCTT 0.666201042227  
AACACGAA 0.358647435335  
AACACGAC -0.316919954927  
AACACGAG 0.801988780239  
AACACGAT 3.06421667762  
AACACGCA 0.47147018651  
AACACGCC -0.955401217744  
AACACGCG 0.048735120939  
AACACGCT 0.557733692551  
AACACGGA 1.56404969234  
AACACGGC -0.833687310272  
AACACGGG 0.650628449628  
AACACGGT -0.249307855279  
AACACGTA 1.88379465954  
AACACGTC -0.396875538963  
AACACGTG 0.0909001541346  
AACACGTT -0.789946668828  
AACACTAA 1.1297646969  
AACACTAC 0.829552514838  
AACACTAG -1.17840336803  
AACACTAT 2.03909061281

AACACTCA 0.112197526403  
AACACTCC 0.0298785299945  
AACACTCG -0.049459147954  
AACACTCT 0.344551125978  
AACACTGA 0.642242282571  
AACACTGC 0.281086629461  
AACACTGG -0.453480598312  
AACACTGT 1.045964451  
AACACTTA 0.549901393091  
AACACTTC -0.683509992754  
AACACTTG -0.43146259699  
AACAGAAA 2.02872212774  
AACAGAAC 0.358519358354  
AACAGAAG 0.169994747201  
AACAGAAT 1.66907987406  
AACAGACA 0.200934225085  
AACAGACC 0.0584253207682  
AACAGACG 1.15646404257  
AACAGACT -0.501620553362  
AACAGAGA -0.507919588392  
AACAGAGC -0.0712656915668  
AACAGAGG -0.315996755138  
AACAGAGT 0.534629912088  
AACAGATA 2.9284177002  
AACAGATC 4.24193574864  
AACAGATG -0.207664801127  
AACAGATT 9.01405164912  
AACAGCAA 0.467362836144  
AACAGCAC -0.656970874003  
AACAGCAG -0.369808952156  
AACAGCAT 1.07541353104  
AACAGCCA -1.37059516295  
AACAGCCC -1.02074740035  
AACAGCCG -0.833851980676  
AACAGCCT -0.723320761934  
AACAGCGA -0.243313591187  
AACAGCGC -0.338566010241  
AACAGCGG -0.263006341851  
AACAGCGT -0.0409428128627  
AACAGCTA -0.632508170633  
AACAGCTC 0.352494773997  
AACAGCTG 0.0683314217941  
AACAGCTT 0.478996930887  
AACAGGAA 0.317512507  
AACAGGAC -0.16244761506  
AACAGGAG -0.783173226205  
AACAGGAT 2.63785990869  
AACAGGCA 0.0161000606556  
AACAGGCC -1.02722391349  
AACAGGCG -0.448698883434  
AACAGGCT -1.19796934863  
AACAGGGA 0.344415207549  
AACAGGGC -0.306104507336  
AACAGGGG -0.486265953012

AACAGGGT 0.124142665242  
AACAGGTA 0.209355678657  
AACAGGTC -0.196583005692  
AACAGGTG -0.374032355949  
AACAGGTT -0.553985219113  
AACAGTAA 1.9058262527  
AACAGTAC 0.82102677001  
AACAGTAG 0.386567694428  
AACAGTAT 1.00276643775  
AACAGTCA -0.0724685696617  
AACAGTCC -1.33010872235  
AACAGTCG -0.761206978438  
AACAGTCT -0.0901123500107  
AACAGTGA 0.0822181031128  
AACAGTGC -0.494118901618  
AACAGTGG 0.475618051023  
AACAGTGT 0.395314829466  
AACAGTTA 0.993124070751  
AACAGTTC -0.606165610841  
AACAGTTG -0.0229495653228  
AACATAAA 0.69756997007  
AACATAAC 1.06333744002  
AACATAAG 0.812977785208  
AACATAAT 1.45835847658  
AACATACA 3.01311605326  
AACATACC 0.625243069232  
AACATACG 0.222381369006  
AACATACT -0.110292315965  
AACATAGA 1.10861605076  
AACATAGC -0.164066089889  
AACATAGG 0.679933508406  
AACATAGT 0.480813271582  
AACATATA 2.22220776155  
AACATATC 4.1016553838  
AACATATG 0.678905233215  
AACATATT 2.35127537878  
AACATCAA 0.950327016862  
AACATCAC 1.06527114105  
AACATCAG 1.86246618286  
AACATCAT 0.92853040575  
AACATCCA 2.0019386172  
AACATCCC 0.563810553226  
AACATCCG 0.682770021462  
AACATCCT 0.704841606011  
AACATCGA 0.864619208089  
AACATCGC 0.289401700725  
AACATCGG 1.17569388643  
AACATCGT 0.212484939099  
AACATCTA 1.35082112261  
AACATCTC 0.240260915553  
AACATCTG 1.56347909633  
AACATCTT 0.670898069469  
AACATGAA 0.621665277975  
AACATGAC 0.847882944634

AACATGAG -0.0700212537984  
AACATGAT 1.81811077191  
AACATGCA -0.0386460527974  
AACATGCC 0.0175648431076  
AACATGCG 0.348653771475  
AACATGCT -0.307554129656  
AACATGGA 2.27822392816  
AACATGGC -0.153595143239  
AACATGGG -0.38465255149  
AACATGGT -0.419403234394  
AACATGTA 0.84060581968  
AACATGTC -0.251654277847  
AACATGTG -0.384040395797  
AACATGTT 1.04884696722  
AACATTAA 1.15080565383  
AACATTAC 0.225127444031  
AACATTAG 0.516653131588  
AACATTAT 0.936131905262  
AACATTCA 0.855303829466  
AACATTCC -0.0151993396831  
AACATTCT -0.18084103782  
AACATTCT 1.25901711092  
AACATTGA 0.909671985134  
AACATTGC 0.89946764771  
AACATTGG 0.293178926138  
AACATTGT 0.264348797717  
AACATTTA 0.690940548705  
AACATTTT 0.85010756338  
AACATTTG 0.946640752244  
AACCAAAA 2.40307911963  
AACCAAAC -0.0805201682791  
AACCAAAG -0.527724471759  
AACCAAAT 3.77769877498  
AACCAACA 1.37676585962  
AACCAACC -0.000341625743179  
AACCAACG 0.285685115842  
AACCAACT -0.312865142262  
AACCAAGA 0.755137436447  
AACCAAGC -0.360748943349  
AACCAAGG -0.902819866651  
AACCAAGT 0.880398030766  
AACCAATA 0.342560443759  
AACCAATC 1.55502340176  
AACCAATG 0.715727626632  
AACCAATT 0.251365973949  
AACCAACA 0.793414679816  
AACCAACAC -0.847011759782  
AACCAACAG -0.273549168439  
AACCAACAT -0.147653416847  
AACCAACCA -0.622075124314  
AACCAACCC -0.650139927429  
AACCAACCG -0.806770756499  
AACCAACCT -0.53274273698  
AACCAACGA 0.592003171941



AACCACGC 0.244479614478  
AACCACGG 0.454991906688  
AACCACGT 0.583128482684  
AACCACTA 0.322262594706  
AACCACTC 0.246802251321  
AACCACTG 0.0536109331909  
AACCACTT -0.591845036076  
AACCAGAA 1.8891503684  
AACCAGAC -0.239490885377  
AACCAGAG 0.116395576182  
AACCAGAT 2.89354861144  
AACCAGCA 0.287581439306  
AACCAGCC -0.968820810154  
AACCAGCG -0.253224919845  
AACCAGCT -0.384595308921  
AACCAGGA 0.0144883817478  
AACCAGGC -0.463123488073  
AACCAGGG -0.724295715279  
AACCAGGT -0.935712649186  
AACCAGTA 0.342362577892  
AACCAGTC -1.44441638236  
AACCAGTG -1.11663706773  
AACCAGTT 0.187360417534  
AACCATAA 0.695723570491  
AACCATAC 0.701360525944  
AACCATAG -0.707444443923  
AACCATAT 3.22773438893  
AACCATCA 0.34078461721  
AACCATCC -0.320645165403  
AACCATCG 0.196039593358  
AACCATCT 0.0106952120577  
AACCATGA 1.42669340339  
AACCATGC -0.485622954291  
AACCATGG -0.507569075675  
AACCATGT -0.21981721557  
AACCATTA 0.255352566019  
AACCATTC 0.0178487035185  
AACCATTG -0.286267212652  
AACCCAAA 0.744548083935  
AACCCAAC 0.943298465803  
AACCCAAG -0.383216521013  
AACCCAAT 0.976041476685  
AACCCACA -0.267347628743  
AACCCACC -0.50655151713  
AACCCACG -0.0381452456636  
AACCCACT 0.458773575588  
AACCCAGA 1.03368761892  
AACCCAGC 0.546346342032  
AACCCAGG -0.163384929455  
AACCCAGT -0.468867871361  
AACCCATA 0.750258748998  
AACCCATC -0.568394140856  
AACCCATG 0.239728742627  
AACCCATT 0.918134214235

AACCCCAA -0.134293942203  
AACCCAC -0.459025024681  
AACCCAG -0.786529888633  
AACCCAT 0.128175521854  
AACCCCA -1.63162389166  
AACCCCC -1.50823818751  
AACCCCG -0.00495605640124  
AACCCCT -1.70490849466  
AACCCGA 0.158235189293  
AACCCGC -0.739956654857  
AACCCGG -0.851459428983  
AACCCGT -0.625207259954  
AACCCCTA -0.0781110141284  
AACCCCTC -0.975583274751  
AACCCCTG -0.202727041437  
AACCCCTT 0.401589294627  
AACCCGAA -0.29391889743  
AACCCGAC -0.647378953653  
AACCCGAG 0.278613959583  
AACCCGAT 1.08969646685  
AACCCGCA 0.438378753963  
AACCCGCC 0.308920109865  
AACCCGCG 0.995121548892  
AACCCGCT -0.652318020251  
AACCCGGA 1.05651172108  
AACCCGGC -1.44595304475  
AACCCGGG -0.538740399033  
AACCCGGT -0.904019608167  
AACCCGTA 0.465432794455  
AACCCGTC -1.24876886139  
AACCCGTG -0.236289483615  
AACCCGTT 0.155705799609  
AACCCCTAA 0.319570887052  
AACCCCTAC -0.657596360157  
AACCCCTAG 0.16126852269  
AACCCCTAT 0.449276013993  
AACCCCTCA -0.435351955106  
AACCCCTCC -0.636767906469  
AACCCCTCG -0.634904778468  
AACCCCTCT -0.455961371019  
AACCCCTGA 0.0890741423199  
AACCCCTGC -0.87880464857  
AACCCCTGG -0.750792490212  
AACCCCTGT -0.140917613173  
AACCCCTTA -0.455381103881  
AACCCCTTC -0.810485511711  
AACCCCTTG -0.941122464034  
AACCGAAA 0.825792279229  
AACCGAAC 0.857961557512  
AACCGAAG -0.771943488788  
AACCGAAT 3.01818790171  
AACCGACA 0.414957133482  
AACCGACC -0.696740606273  
AACCGACG -0.362160665338

AACCGACT -0.0606865329368  
AACCGAGA -0.53307730542  
AACCGAGC 0.135211391597  
AACCGAGG -0.258390342903  
AACCGAGT -0.0847702329953  
AACCGATA 0.874558243196  
AACCGATC 0.799244796267  
AACCGATG -0.308546072805  
AACCGATT 3.00489795457  
AACCGCAA 0.864358349259  
AACCGCAC -0.0703231495393  
AACCGCAG 0.334164344201  
AACCGCAT -0.285354729507  
AACCGCCA -0.526024184491  
AACCGCCC -0.39360983733  
AACCGCCG -0.658598235807  
AACCGCCT -1.14361818276  
AACCGCGA 0.410071127348  
AACCGCGC 0.478563560204  
AACCGCGG 0.80275306002  
AACCGCGT 0.40271637206  
AACCGCTA -0.829573425366  
AACCGCTC -0.708854859003  
AACCGCTG -0.663061849285  
AACCGCTT 1.02648263529  
AACCGGAA -0.194874354213  
AACCGGAC -0.497255480744  
AACCGGAG -0.284370105043  
AACCGGAT 3.9134509651  
AACCGGCA -0.130654987653  
AACCGGCC -0.146317495521  
AACCGGCG 0.0364807676739  
AACCGGCT -0.469639731208  
AACCGGGA -0.87815694498  
AACCGGGC -1.571632111  
AACCGGGG -0.312651593499  
AACCGGGT -0.421846368152  
AACCGGTA -0.212637063187  
AACCGGTC -0.591180342683  
AACCGGTG -0.315170266538  
AACCGGTT 0.994707781829  
AACCGTAA 0.55742029602  
AACCGTAC -0.055002267415  
AACCGTAG -0.622075124314  
AACCGTAT 2.46738631041  
AACCGTCA -0.0477476212773  
AACCGTCC -0.175624906733  
AACCGTCG 0.931610526452  
AACCGTCT -0.757614027049  
AACCGTGA -0.0384523690364  
AACCGTGC -0.635936713  
AACCGTGG -0.15109947178  
AACCGTGT -0.00263420370295  
AACCGTTA 1.08370821454

AACCGTTC -0.821066500012  
AACCGTTG -1.20068458062  
AACCTAAA 0.512998755524  
AACCTAAC 0.224193266215  
AACCTAAG -0.527323773776  
AACCTAAT 0.735977904235  
AACCTACA -0.402733100482  
AACCTACC -0.643510506064  
AACCTACG -0.0236806496408  
AACCTACT 0.446984220178  
AACCTAGA -0.261260835567  
AACCTAGC -0.251575340606  
AACCTAGG 0.104731422555  
AACCTAGT -0.78200145252  
AACCTATA 0.421351834176  
AACCTATC 0.390960734876  
AACCTATG 0.0257617698911  
AACCTATT 0.685292353843  
AACCTCAA 0.248080668696  
AACCTCAC -0.182038949664  
AACCTCAG -0.430518748054  
AACCTCAT -0.517454527555  
AACCTCCA -1.15588795754  
AACCTCCC -1.75082513787  
AACCTCCG -0.85010756338  
AACCTCCT -0.959782234638  
AACCTCGA -0.0348424278435  
AACCTCGC -0.642073691443  
AACCTCGG -0.487772033756  
AACCTCGT -0.995126776524  
AACCTCTA -0.243544652516  
AACCTCTC -0.892530318827  
AACCTCTG -1.4041764246  
AACCTCTT -0.535604342669  
AACCTGAA 0.0745329614901  
AACCTGAC -0.402028938468  
AACCTGAG 0.0214847828708  
AACCTGAT 2.81225893574  
AACCTGCA -0.150251027127  
AACCTGCC -0.970268341421  
AACCTGCG -0.65076645911  
AACCTGCT -0.23176888895  
AACCTGGA -0.393579517065  
AACCTGGC -0.771272783618  
AACCTGGG -0.513684882208  
AACCTGGT -0.58553685269  
AACCTGTA 0.689026974056  
AACCTGTC -0.757726421134  
AACCTGTG -0.115052597552  
AACCTTAA 0.0771804956543  
AACCTTAC 0.102137733  
AACCTTAG 0.716077877968  
AACCTTAT 0.606250559859  
AACCTTCA 0.114698164111

AACCTTCC -0.303503237714  
AACCTTCG -0.685059201461  
AACCTTCT -0.752851654409  
AACCTTGA 0.608246208328  
AACCTTGC -0.321501451504  
AACCTTGG -0.978957972509  
AACCTTGT 0.507078201042  
AACCTTTA 0.693263185548  
AACCTTTC -0.67224784402  
AACCTTTG 1.5041656009  
AACGAAAA -0.0286108292643  
AACGAAAC 0.782381501357  
AACGAAAG 1.09124698247  
AACGAAAT 6.9612973135  
AACGAACA 0.28311834859  
AACGAACC 0.0192625165597  
AACGAACG -0.401329219941  
AACGAACT 0.147729217509  
AACGAAGA 0.848165498137  
AACGAAGC -0.577494925192  
AACGAAGG -0.837205245143  
AACGAAGT 0.136532675554  
AACGAATA 1.56477764008  
AACGAATC 5.89491713034  
AACGAATG 0.376895529929  
AACGAATT 3.05399456625  
AACGACAA 1.30328156108  
AACGACAC 0.266027913076  
AACGACAG 0.71025481882  
AACGACAT 1.02988373259  
AACGACCA -0.510221053326  
AACGACCC -0.897704628859  
AACGACCG 0.00420928918757  
AACGACCT -0.316454172927  
AACGACGA -0.533721611049  
AACGACGC -1.15992525764  
AACGACGG 0.135789306301  
AACGACGT 1.13204106921  
AACGACTA 0.585726092964  
AACGACTC 0.0486974819894  
AACGACTG -0.156479227745  
AACGACTT 0.616694845586  
AACGAGAA 1.72135619283  
AACGAGAC -0.222424758351  
AACGAGAG 0.158849958802  
AACGAGAT 5.49822978612  
AACGAGCA -1.30397422231  
AACGAGCC -0.87633825185  
AACGAGCG -1.24503554809  
AACGAGCT -1.16561814875  
AACGAGGA 0.869123074333  
AACGAGGC -0.892295075392  
AACGAGGG -1.10782955355  
AACGAGGT -0.903076543376

AACGAGTA -0.368330055098  
AACGAGTC -0.594206618777  
AACGAGTG 0.723737404195  
AACGAGTT 0.28110936966  
AACGATAA 1.40607666879  
AACGATAC 1.32209999031  
AACGATAG -0.188559113523  
AACGATAT 4.57661893531  
AACGATCA 1.27613603703  
AACGATCC 2.00351657788  
AACGATCG 1.23902664663  
AACGATCT 2.5956933072  
AACGATGA 0.835989297969  
AACGATGC -1.13471291186  
AACGATGG 0.428833359537  
AACGATGT 0.228145878677  
AACGATTA 0.279554410558  
AACGATTC 2.64307211905  
AACGATTG 0.9876972661  
AACGCAAA 1.92839080294  
AACGCAAC 1.28790029981  
AACGCAAG -0.0550331104431  
AACGCAAT 3.34609006568  
AACGCACA 0.481796589138  
AACGCACC -0.443520391296  
AACGCACG -0.731751886626  
AACGCACT 0.15655551171  
AACGCAGA 0.347217218235  
AACGCAGC 0.188000279676  
AACGCAGG 0.353610612021  
AACGCAGT -0.846970984253  
AACGCATA 0.144908910111  
AACGCATC 0.384429854372  
AACGCATG -0.466901759012  
AACGCATT 1.34999594092  
AACGCCAA -0.182344504748  
AACGCCAC -0.191222591965  
AACGCCAG -0.822683929315  
AACGCCAT 1.97007855334  
AACGCCCA -1.10505028306  
AACGCCCC -1.54907749327  
AACGCCCG -0.706914884814  
AACGCCCT -0.108669920412  
AACGCCGA -0.0057966596071  
AACGCCGC -0.7655202975  
AACGCCGG -0.552986218661  
AACGCCGT -0.88471161121  
AACGCCTA -0.25584474756  
AACGCCTC 0.0989899144646  
AACGCCTG -0.957878069727  
AACGCCTT -0.367211603258  
AACGCGAA 0.11281203453  
AACGCGAC -0.198188411441  
AACGCGAG 0.0901865823833

AACGCGAT 3.83063926438  
AACGCGCA 0.198211935785  
AACGCGCC -0.456838567648  
AACGCGCG 1.71619286083  
AACGCGCT 0.310037516179  
AACGCGGA 0.451325507071  
AACGCGGC -1.34482450608  
AACGCGGG -0.800874771886  
AACGCGGT -0.556307333193  
AACGCGTA 0.72816285596  
AACGCGTC -0.297316335387  
AACGCGTG -0.287273531788  
AACGCGTT 1.01451658592  
AACGCTAA -0.0441316683078  
AACGCTAC 1.42317102503  
AACGCTAG -1.10064443491  
AACGCTAT -0.03419080353  
AACGCTCA 0.977967336268  
AACGCTCC -0.550320126404  
AACGCTCG -1.04899177262  
AACGCTCT -0.339294219362  
AACGCTGA 0.164593557945  
AACGCTGC -0.131081301033  
AACGCTGG -0.400372824689  
AACGCTGT -0.359101716545  
AACGCTTA -0.0558371202258  
AACGCTTC -0.927794616563  
AACGCTTG 1.1862171094  
AACGAAA 0.0567548310019  
AACGGAAC -0.658347570858  
AACGGAAG -0.685878371376  
AACGGAAT 4.90939351358  
AACGGACA 0.238325646232  
AACGGACC -0.668324506296  
AACGGACG -1.36656047667  
AACGGACT -0.761258209231  
AACGGAGA 1.3919552668  
AACGGAGC -0.114823365894  
AACGGAGG -0.2910834299  
AACGGAGT -0.451390591088  
AACGGATA 2.41722665978  
AACGGATC 2.89199443648  
AACGGATG -0.122085592098  
AACGGATT 5.45933881877  
AACGGCAA 0.588756812545  
AACGGCAC -0.429070432643  
AACGGCAG -0.928365735346  
AACGGCAT -0.0179783487891  
AACGGCCA -0.334891507795  
AACGGCCC -0.973882203338  
AACGGCCG -0.308702117616  
AACGGCCT -1.12496076459  
AACGGCGA 0.285174898971  
AACGGCGC 0.0764211821241

AACGGCGG -0.619153139477  
AACGGCGT -0.635453679815  
AACGGCTA -0.332289715409  
AACGGCTC -0.599311924068  
AACGGCTG -0.722868049014  
AACGGCTT -0.277052727323  
AACGGGAA 0.733789878913  
AACGGGAC -0.64891169532  
AACGGGAG -0.817738066796  
AACGGGAT 1.28493152767  
AACGGGCA -0.882971593939  
AACGGGCC -1.50968049115  
AACGGGCG -0.261491896896  
AACGGGCT -0.39360983733  
AACGGGGA 1.13159306115  
AACGGGGC -1.03641095375  
AACGGGGG -0.107070787821  
AACGGGGT -1.13504329819  
AACGGGTA -0.272588591082  
AACGGGTC -1.55787141561  
AACGGGTG -0.701118486588  
AACGGTAA 0.562434379135  
AACGGTAC 1.5263074971  
AACGGTAG -0.438590473054  
AACGGTAT 0.807783871557  
AACGGTCA -0.591670694553  
AACGGTCC -1.21372151038  
AACGGTCG -1.03158114466  
AACGGTCT -0.20138118761  
AACGGTGA 1.76519642066  
AACGGTGC -1.25788898797  
AACGGTGG -0.164118366208  
AACGGTGT 0.29493724012  
AACGGTTA -1.33567092267  
AACGGTTC 0.040385285923  
AACGGTTG 0.913024204075  
AACGTAAG 0.21514005333  
AACGTAAT 5.5258222727  
AACGTACA -0.0721841864876  
AACGTACC -0.822233046065  
AACGTACG -0.242096337105  
AACGTACT -0.262824681643  
AACGTAGA 2.11756965222  
AACGTAGC -0.42388619011  
AACGTAGG 0.385942469655  
AACGTAGT 1.26392010686  
AACGTATA 1.44042377851  
AACGTATC 4.29758545827  
AACGTATG 0.502941314556  
AACGTATT 1.43992244862  
AACGTCAA 0.370483316668  
AACGTCAC -0.323279630487



AACGTCAG -0.490589988719  
AACGTCAT 0.56018205394  
AACGTCCA -0.700110337781  
AACGTCCC 0.421416918193  
AACGTCCG -0.731602899117  
AACGTCCT -0.266712210088  
AACGTCGA 0.58205864782  
AACGTCGC 0.422658742145  
AACGTCGG -1.00238638891  
AACGTCGT 0.684598647093  
AACGTCTA -0.436907698353  
AACGTCTC -0.633008977767  
AACGTCTG -0.8529119265  
AACGTCTT 0.010998153325  
AACGTGAA 0.811773338824  
AACGTGAC -0.582462221001  
AACGTGAG -0.554282671367  
AACGTGAT 3.24712289142  
AACGTGCA 0.773826220408  
AACGTGCC -1.11545849813  
AACGTGCG -0.442924179881  
AACGTGCT 0.460401198773  
AACGTGGA 0.630926027846  
AACGTGGC -0.432142189134  
AACGTGGG -0.95602879495  
AACGTGGT -0.194178817791  
AACGTGTA -0.862689950545  
AACGTGTC -0.195747630118  
AACGTGTG 0.181704642606  
AACGTTAA 0.796770035336  
AACGTTAC 0.849531478347  
AACGTTAG 0.221757973905  
AACGTTAT 1.67317310982  
AACGTTCA -0.688427103298  
AACGTTCC 0.526954180202  
AACGTTCG 0.471640084546  
AACGTTCT -0.324037375728  
AACGTTGA 0.10028793546  
AACGTTGC -0.592120793658  
AACGTTGG -0.0338815891045  
AACGTTGT 0.17249878287  
AACGTTTA 0.348316589219  
AACGTTTC 0.830858377281  
AACGTTTG -0.502511864597  
AACTAAAA 1.83340211791  
AACTAAAC 0.524060163195  
AACTAAAG -0.577817470078  
AACTAAAT 2.13480306347  
AACTAACA 1.00457781219  
AACTAACG -0.0905621877337  
AACTAACG 0.722430496225  
AACTAACT 0.783144735611  
AACTAAGA 0.910166257728  
AACTAAGC 0.814803535641

AACTAAGG 1.14595179763  
AACTAAGT 0.615879857777  
AACTAATA 0.382422182349  
AACTAATC 0.133227766682  
AACTAATG -0.00175230220526  
AACTAATT 1.25156120096  
AACTACAA 0.997496984817  
AACTACAC 0.563475462023  
AACTACAG 0.643888986612  
AACTACAT 0.649189282572  
AACTACCA -0.150476338061  
AACTACCC -0.275305391368  
AACTACCG -0.474453857404  
AACTACCT -0.465998946987  
AACTACGA -0.0122501711596  
AACTACGC -0.42619523511  
AACTACGG -0.701899494791  
AACTACGT 0.760299984308  
AACTACTA 0.404759853361  
AACTACTC -0.142442774773  
AACTACTG 2.0557581329  
AACTACTT -0.132331750578  
AACTAGAA 2.38477143003  
AACTAGAC 0.692848372958  
AACTAGAG -0.0583343599736  
AACTAGAT 3.17777103588  
AACTAGCA 1.00051254427  
AACTAGCC 0.108311304865  
AACTAGCG -1.02320464872  
AACTAGCT -0.977459471831  
AACTAGGA -0.218409937069  
AACTAGGC -0.0285269257726  
AACTAGGG 0.331335933973  
AACTAGGT 0.604570660355  
AACTAGTA -0.517185043132  
AACTAGTC -0.356861153522  
AACTAGTG 0.0119077612716  
AACTAGTT -0.201586894925  
AACTATAA -0.0850878116318  
AACTATAC -0.160045518212  
AACTATAG -0.532222587608  
AACTATAT 0.749430169345  
AACTATCA 1.15208041186  
AACTATCC 0.192700443496  
AACTATCG -0.131454553949  
AACTATCT 1.60009630519  
AACTATGA -0.140215019449  
AACTATGC 0.392140350009  
AACTATGG 0.0060907139002  
AACTATGT 0.995739193598  
AACTATTA 0.903020084952  
AACTATTC 0.856976671666  
AACTATTG 0.0730284490358  
AACTCAA 0.380757181596

AACTCAAC 0.390893559806  
AACTCAAG -0.152224196779  
AACTCAAT 1.72104122801  
AACTCACA 0.228910681221  
AACTCACC -0.649679373061  
AACTCACG -0.476340248367  
AACTCACT 0.502216503396  
AACTCAGA 1.05563844517  
AACTCAGC 0.271017164939  
AACTCAGG 1.24312511002  
AACTCAGT -0.829643475633  
AACTCATA 1.36313533226  
AACTCATC -0.65762302108  
AACTCATG 0.263019149549  
AACTCATT 0.718181999799  
AACTCCAA 0.238100335298  
AACTCCAC -0.810288429989  
AACTCCAG 0.616618783543  
AACTCCAT 0.472331700243  
AACTCCCA -0.279237354685  
AACTCCCC -0.83293923615  
AACTCCCG -0.137036619267  
AACTCCCT -0.084050910849  
AACTCCGA -0.0546982806214  
AACTCCGC -0.285971851451  
AACTCCGG -0.524370684528  
AACTCCGT 0.90513361652  
AACTCCTA 0.104024646726  
AACTCCTC 0.026975626013  
AACTCCTG -0.35368092367  
AACTCCTT -1.09167800072  
AACTCGAA -0.449546543943  
AACTCGAC -0.746926133676  
AACTCGAG -0.270201131603  
AACTCGAT 1.39841714256  
AACTCGCA 0.772281193807  
AACTCGCC -0.0713213658463  
AACTCGCG -0.583053466167  
AACTCGCT -0.626070080595  
AACTCGGA 0.186795310528  
AACTCGGC -0.0959045661307  
AACTCGGG -0.416626054959  
AACTCGGT 0.220880777276  
AACTCGTA 0.561143938206  
AACTCGTC -0.124050658921  
AACTCGTG -0.467613762474  
AACTCTAA 0.582088445322  
AACTCTAC -0.103991712645  
AACTCTAG -0.548010558641  
AACTCTAT 0.0599797571069  
AACTCTCA 0.547621622829  
AACTCTCC 0.749255043677  
AACTCTCG -0.758203965306  
AACTCTCT -0.0230643118425

AACTCTGA 0.641435136209  
AACTCTGC -0.460030559673  
AACTCTGG -0.282426471511  
AACTCTGT -0.0232336871153  
AACTCTTA 0.590746710619  
AACTCTTC -0.388968745749  
AACTCTTG -0.514096558218  
AACTGAAA 0.82102677001  
AACTGAAC -0.198184490717  
AACTGAAG 1.05826611434  
AACTGAAT 2.80128587505  
AACTGACA -0.451910740459  
AACTGACC 0.0662853266773  
AACTGACG -0.993149424766  
AACTGACT 0.00483974159197  
AACTGAGA 0.384797618274  
AACTGAGC -0.326056809922  
AACTGAGG -0.456838567648  
AACTGAGT -0.758423787227  
AACTGATA 2.94672329875  
AACTGATC 1.40928695753  
AACTGATG 0.834998661728  
AACTGATT 2.56688827141  
AACTGCAA 1.7706532842  
AACTGCAC 0.794284296378  
AACTGCAG 0.810945020553  
AACTGCAT -0.0468994380053  
AACTGCCA -0.558432626933  
AACTGCCC -0.781928265673  
AACTGCCG -0.953160916103  
AACTGCCT -0.0295690541874  
AACTGCGA 0.289413201515  
AACTGCGC -0.44754697475  
AACTGCGG -0.484318137374  
AACTGCGT 0.185202451095  
AACTGCTA -0.581225363299  
AACTGCTC -0.495433651035  
AACTGCTG -0.26595158965  
AACTGCTT -0.146431719277  
AACTGGAA 0.0508172867157  
AACTGGAC 0.593297533593  
AACTGGAG 0.695962473268  
AACTGGAT 0.610022819021  
AACTGGCA -0.145850406612  
AACTGGCC 0.304082982089  
AACTGGCG -0.174585130752  
AACTGGCT -0.600753966321  
AACTGGGA -0.39232906752  
AACTGGGC -1.02871065199  
AACTGGGG -0.843490949713  
AACTGGGT -0.217185625683  
AACTGGTA 0.902569463084  
AACTGGTC -0.0970190972469  
AACTGGTG -0.0974725943123

AACTGTAA 0.372505887441  
AACTGTAC -0.263838058082  
AACTGTAG 0.827069389697  
AACTGTAT 0.86017023198  
AACTGTCA 0.915003385504  
AACTGTCC -0.261981203239  
AACTGTCCG -0.421577929255  
AACTGTCT -0.349801759435  
AACTGTGA 2.46352152216  
AACTGTGC -0.482054050008  
AACTGTGG -0.351149442933  
AACTGTGT 0.191604731855  
AACTGTTA 1.57724920145  
AACTGTTC -0.1580888156  
AACTGTTG -0.478423982433  
AACTTAAA 1.33428769127  
AACTTAAC 0.803946528377  
AACTTAAG 1.59882834308  
AACTTAAT 0.350193309063  
AACTTACA 1.23626201351  
AACTTACC 0.390560036893  
AACTTACG 0.00504623305112  
AACTTACT -0.524370684528  
AACTTAGA 1.68959284017  
AACTTAGC 0.478644588498  
AACTTAGG -0.463879142261  
AACTTAGT -0.383523383004  
AACTTATA 1.40504342735  
AACTTATC 0.751624729207  
AACTTATG 0.369977543284  
AACTTATT 0.439151397955  
AACTTCAA 0.856572052959  
AACTTCAC -0.641383382653  
AACTTCAG 0.231994461265  
AACTTCAT 0.900693788766  
AACTTCCA -0.396227312611  
AACTTCCC -0.593186185034  
AACTTCCG 0.1294884416  
AACTTCCT -0.549557937676  
AACTTCGA 0.334073906169  
AACTTCGC -0.132778713103  
AACTTCGG -0.658347570858  
AACTTCGT 1.10836120371  
AACTTCTA -0.0515739864299  
AACTTCTC 1.60235385802  
AACTTCTG 0.726103953146  
AACTTCTT 0.287010059141  
AACTTGAA 0.925269670366  
AACTTGAC 0.212812711618  
AACTTGAG -0.333143387695  
AACTTGAT 1.09502420788  
AACTTGCA 0.0301493213257  
AACTTGCC 0.695185647171  
AACTTGCG 0.181347072585

AACTTGCT 0.0861586920219  
AACTTGGA 1.39761679212  
AACTTGGC -0.313262965047  
AACTTGGG -0.694262970144  
AACTTGGT -0.621205769133  
AACTTGTA 0.687521416075  
AACTTGTC -0.691957061723  
AACTTGTG -0.0907072545183  
AACTTTAA 0.367390911031  
AACTTTAC 0.374608702364  
AACTTTAG -0.0443841629275  
AACTTTAT 0.702717096416  
AACTTTCA 0.634056333814  
AACTTTCC 0.884934046946  
AACTTTCG 1.17169370252  
AACTTTCT 0.0583670326728  
AACTTTGA -0.00634765200696  
AACTTTGC 0.188327790813  
AACTTTGG 0.982393310797  
AACTTTGT -0.679047424802  
AACTTTTA -0.0986519480638  
AACTTTTC -0.0393347932973  
AACTTTTG -0.19843907639  
AAGAAAA 1.9150057129  
AAGAAAAC 0.0869974655566  
AAGAAAAG 0.196139179745  
AAGAAAAT 5.2444706023  
AAGAAACA 1.92754261967  
AAGAAACC 0.982060049265  
AAGAAACG 0.581369645939  
AAGAAACT 0.110354263403  
AAGAAAGA 1.48976791857  
AAGAAAGC -0.757083422413  
AAGAAAGG -0.400138626781  
AAGAAAGT 1.15899264811  
AAGAAATA 1.08307175036  
AAGAAATC 12.742660347  
AAGAAATG 0.340010666311  
AAGAAATT 1.95767965606  
AAGAACAA 0.197064993351  
AAGAACAC 0.354609873854  
AAGAACAG -1.02240272999  
AAGAACAT 0.972699190244  
AAGAACCA -0.198876890559  
AAGAACCC -0.868451323637  
AAGAACCG -0.0669429627675  
AAGAACCT 0.141194416281  
AAGAACGA 0.194555991431  
AAGAACGC -1.25144514753  
AAGAACGG -0.877275043483  
AAGAACGT 0.658486103103  
AAGAACTA -0.147117061816  
AAGAACTC -0.679845161427  
AAGAACTG -0.244889460817

AAGAACTT -0.131733709491  
AAGAAGAA -1.01684000691  
AAGAAGAC 0.405953060337  
AAGAAGAG 0.265124316906  
AAGAAGAT 4.64891447036  
AAGAAGCA 0.0587962212499  
AAGAAGCC -1.04953230976  
AAGAAGCG -0.0237365853019  
AAGAAGCT -0.924270408533  
AAGAAGGA -0.66020913057  
AAGAAGGC -1.325347918  
AAGAAGGG -0.757083422413  
AAGAAGGT -0.647900148551  
AAGAAGTA 0.012241545567  
AAGAAGTC -0.606200897356  
AAGAAGTG 0.719148850314  
AAGAATAA 2.1647534734  
AAGAATAC 1.77312516993  
AAGAATAG -0.0541749946704  
AAGAATAT 3.78693286393  
AAGAATCA 4.48094935123  
AAGAATCC 11.8435236083  
AAGAATCG 7.37999795417  
AAGAATCT 15.7675168773  
AAGAATGA 0.535200769489  
AAGAATGC 0.0495349486162  
AAGAATGG 0.201990990869  
AAGAATGT 1.01004852895  
AAGAATTA 2.34121584676  
AAGAATTC 2.55876636115  
AAGAATTG 0.493722647122  
AAGACAAA -0.264346706664  
AAGACAAC -0.404940729424  
AAGACAAG -0.269280022866  
AAGACAAT 2.53073370797  
AAGACACA 0.324098539021  
AAGACACC -0.647205919038  
AAGACACG 0.1223482806  
AAGACACT -1.18196286258  
AAGACAGA 0.392374547917  
AAGACAGC -0.158068427836  
AAGACAGG -0.892886320558  
AAGACAGT -0.566029160195  
AAGACATA -0.0659721915279  
AAGACATC 0.529250940267  
AAGACATG 0.747987342947  
AAGACATT 0.883735350957  
AAGACCAA -0.83328190742  
AAGACCAC -1.05803818959  
AAGACCAG -0.919392243847  
AAGACCAT -0.190750275425  
AAGACCCA -1.01317047071  
AAGACCCC -0.712288629002  
AAGACCCG -1.36659131969

AAGACCCT -1.27637128047  
AAGACCGA -0.867049795531  
AAGACCGC -0.275934014101  
AAGACCGG 0.250949331689  
AAGACCGT 0.39567945679  
AAGACCTA -0.843998552768  
AAGACCTC -0.841034485494  
AAGACCTG -0.312794830613  
AAGACCTT -0.449650051054  
AAGACGAA 3.12958821425  
AAGACGAC -0.79894028671  
AAGACGAG -0.53642926298  
AAGACGAT 1.88810614893  
AAGACGCA -0.359084726741  
AAGACGCC -0.252748421199  
AAGACGCG -0.0321549022954  
AAGACGCT -0.741374388622  
AAGACGGA -0.36377469668  
AAGACGGC -0.72422043738  
AAGACGGG -0.985184866219  
AAGACGGT -0.45439203593  
AAGACGTA -0.440313761903  
AAGACGTC 0.297443889605  
AAGACGTG -0.565550309115  
AAGACTAA 0.209275173126  
AAGACTAC 0.185226498202  
AAGACTAG -0.742531524938  
AAGACTAT 0.372505887441  
AAGACTCA -0.697947405091  
AAGACTCC -0.111854070988  
AAGACTCG 0.263253086075  
AAGACTCT -0.421528266752  
AAGACTGA 1.44984606221  
AAGACTGC 0.218419346806  
AAGACTGG -1.17443768649  
AAGACTGT 0.710547043442  
AAGACTTA 0.853031900652  
AAGACTTC 0.674787950349  
AAGACTTG -0.381889486661  
AAGAGAAA 0.227199677307  
AAGAGAAC 0.440475034346  
AAGAGAAG 0.670855202888  
AAGAGAAT 5.31208897511  
AAGAGACA -0.538009837478  
AAGAGACC -0.929213134473  
AAGAGACG -0.703443737247  
AAGAGACT 0.302173328165  
AAGAGAGA -0.903872188948  
AAGAGAGC -1.10128560396  
AAGAGAGG -0.97960593748  
AAGAGAGT -0.927614786026  
AAGAGATA 4.13444361369  
AAGAGATC 6.55158035821  
AAGAGATG -0.348423755672



AAGAGATT 6.61820443543  
AAGAGCAA -0.207316902225  
AAGAGCAC 0.152460224358  
AAGAGCAG -0.50605463072  
AAGAGCAT -0.560366327964  
AAGAGCCA -0.0728078429706  
AAGAGCCC -1.70014716755  
AAGAGCCG -0.896762609595  
AAGAGCCT -1.45769587424  
AAGAGCGA 0.933840634211  
AAGAGCGC -0.369808952156  
AAGAGCGG -0.642324356391  
AAGAGCGT -0.198266041775  
AAGAGCTA 0.373243506299  
AAGAGCTC -1.0626191634  
AAGAGCTG -0.280813224314  
AAGAGCTT -1.03929425411  
AAGAGGAA -0.000345807848681  
AAGAGGAC -0.740779484115  
AAGAGGAG -0.645683371254  
AAGAGGAT 2.1786234263  
AAGAGGCA -0.555457843013  
AAGAGGCC -0.542248140022  
AAGAGGCG -1.44342391645  
AAGAGGCT -0.763177795656  
AAGAGGGA 0.0176309726508  
AAGAGGGC -0.822976153937  
AAGAGGGG -1.28808196002  
AAGAGGGT -0.43090663834  
AAGAGGTA 0.299340213069  
AAGAGGTC -0.253658551909  
AAGAGGTG -0.10111285577  
AAGAGTAA 1.42138840256  
AAGAGTAC -0.236036988996  
AAGAGTAG -0.107068696768  
AAGAGTAT 1.45793477701  
AAGAGTCA -0.029576372872  
AAGAGTCC -1.29836758712  
AAGAGTCG -0.364590730016  
AAGAGTCT 0.131343728153  
AAGAGTGA -0.171928970995  
AAGAGTGC 0.145946856421  
AAGAGTGG -0.903805013878  
AAGAGTGT -0.293195915942  
AAGAGTTA 0.607319087815  
AAGAGTTC 0.0775148027128  
AAGAGTTG -0.67795641803  
AAGATAAA 1.17557940129  
AAGATAAC 2.11419024959  
AAGATAAG 0.829471225163  
AAGATAAT 2.50189521534  
AAGATACA 1.01610055838  
AAGATACC 2.38115103358  
AAGATACG 4.01943675792

AAGATACT 3.67825510207  
AAGATAGA 0.756260070393  
AAGATAGC 1.51332990096  
AAGATAGG -0.21321314822  
AAGATAGT 0.293290013316  
AAGATATA 5.27692844586  
AAGATATC 19.8613595652  
AAGATATG 5.52610142824  
AAGATATT 6.32295432154  
AAGATCAA 2.36302552695  
AAGATCAC 3.51709452998  
AAGATCAG 3.98936454417  
AAGATCAT 2.75760874934  
AAGATCCA 2.69270404024  
AAGATCCC 7.62721135873  
AAGATCCG 5.66819891793  
AAGATCCT 5.66236488075  
AAGATCGA 2.81166952025  
AAGATCGC 8.27236098877  
AAGATCGG 1.13528272373  
AAGATCGT 3.46732982694  
AAGATCTA 5.29220463174  
AAGATCTC 9.67573366497  
AAGATCTG 7.18364470289  
AAGATCTT 5.73661973223  
AAGATGAA -0.466141661337  
AAGATGAC 0.97078483145  
AAGATGAG -0.0690781890077  
AAGATGAT 1.78065661918  
AAGATGCA 0.2037344061  
AAGATGCC -0.0573162786655  
AAGATGCG 1.01651641649  
AAGATGCT 0.71208658103  
AAGATGGA -0.277625414395  
AAGATGGC 0.147583627961  
AAGATGGG 0.56696307663  
AAGATGGT -0.697085368595  
AAGATGTA 0.141492129916  
AAGATGTC 0.427653221641  
AAGATGTG 0.6259791198  
AAGATTAA 1.25980439229  
AAGATTAC 14.9713898407  
AAGATTAG 1.6238697453  
AAGATTAT 5.60571460239  
AAGATTCA 3.79299561  
AAGATTCC 12.5977464706  
AAGATTCCG 7.88032362311  
AAGATTCT 13.6531661394  
AAGATTGA 0.678619281752  
AAGATTGC 9.17694674947  
AAGATTGG 2.67087318814  
AAGATTGT 4.49147518802  
AAGATTTA 4.44850902024  
AAGATTTTC 18.5186130428

AAGATTTG 7.79575779052  
AAGCAAAA -0.259157497881  
AAGCAAAC 0.228496130013  
AAGCAAAG -0.416161318485  
AAGCAAAT 1.8079247312  
AAGCAACA 0.209738341311  
AAGCAACC -0.268871744817  
AAGCAACG 0.0672584503513  
AAGCAACT 0.21586983074  
AAGCAAGA 1.48007327525  
AAGCAAGC -0.407835530576  
AAGCAAGG -0.302866773533  
AAGCAAGT 0.218870491437  
AAGCAATA 1.53092297328  
AAGCAATC 7.56512199078  
AAGCAATG -0.111523946035  
AAGCAATT 2.5157429508  
AAGCACAA -0.390209262794  
AAGCACAC 0.226048030005  
AAGCACAG -1.20430785228  
AAGCACAT 0.095327696953  
AAGCACCA -0.660011526085  
AAGCACCC -0.786949406091  
AAGCACCG -0.0983623372578  
AAGCACCT -0.803931106863  
AAGCACGA 0.604935287678  
AAGCACGC 2.07834385505  
AAGCACGG -0.74350595552  
AAGCACGT 1.24629723704  
AAGCACTA 0.37142821113  
AAGCACTC -0.488075759168  
AAGCACTG -0.582522861531  
AAGCACTT 0.490345074166  
AAGCAGAA 2.09365192947  
AAGCAGAC 0.707953353886  
AAGCAGAG -0.0215937789954  
AAGCAGAT 3.6889364609  
AAGCAGCA -0.355414667782  
AAGCAGCC -0.742774087057  
AAGCAGCG 0.279606164114  
AAGCAGCT -0.756611890018  
AAGCAGGA -0.366423537752  
AAGCAGGC -0.802925571872  
AAGCAGGG -0.116730406003  
AAGCAGGT -0.920365890284  
AAGCAGTA 0.532221019319  
AAGCAGTC -0.903872188948  
AAGCAGTG -0.823053522889  
AAGCATAA 0.391701751695  
AAGCATAC -0.223067234308  
AAGCATAG 0.443630432947  
AAGCATAT 2.00054283949  
AAGCATCA -0.117411305055  
AAGCATCC 0.141667255584

AAGCATCG 0.931524270526  
AAGCATCT 0.702622214898  
AAGCATGA -1.22632663774  
AAGCATGC 0.0867091616586  
AAGCATGG -0.523994817796  
AAGCATGT -0.43830608988  
AAGCATT A 1.58167569875  
AAGCATTC -0.715266549501  
AAGCATTG 0.301368011474  
AAGCCAAA 0.0272312572118  
AAGCCAAC -0.436645532615  
AAGCCAAG -0.456632076189  
AAGCCAAT 0.639563643997  
AAGCCACA -1.29285975417  
AAGCCACC -1.24822257386  
AAGCCACG -0.269702415522  
AAGCCACT -0.103908070535  
AAGCCAGA -0.103908070535  
AAGCCAGC -0.949574499253  
AAGCCAGG -1.02762121351  
AAGCCAGT -0.497506145693  
AAGCCATA 0.397381050966  
AAGCCATC -0.30297786071  
AAGCCATG -0.646725499668  
AAGCCATT -0.518787573684  
AAGCCCAA -0.318753285426  
AAGCCCAC -1.16971216866  
AAGCCCAG -1.38653656498  
AAGCCCAT -0.427330676754  
AAGCCCCA -1.28743347228  
AAGCCCCC -1.64670770068  
AAGCCCCG -0.423332583894  
AAGCCCCCT -1.13236831896  
AAGCCCGA -0.78927465675  
AAGCCCGC -1.98749440894  
AAGCCCGG -1.25366035654  
AAGCCCGT -1.23742986647  
AAGCCCTA -0.251306901709  
AAGCCCTC -0.922328604672  
AAGCCCTG -1.38489169061  
AAGCCCTT -1.49798732417  
AAGCCGAA 0.539302369459  
AAGCCGAC -0.884076715318  
AAGCCGAG -0.913426993111  
AAGCCGAT 0.750753282973  
AAGCCGCA -1.05997633411  
AAGCCGCC -0.840417624932  
AAGCCGCG -0.749917384636  
AAGCCGCT -0.642324356391  
AAGCCGGA 0.0180400348452  
AAGCCGGC -0.655826284004  
AAGCCGGG -0.464490252427  
AAGCCGGT -1.01049026385  
AAGCCGTA -0.375991933759

AAGCCGTC -1.65647526946  
AAGCCGTG -1.41952083107  
AAGCCTAA -0.575678845877  
AAGCCTAC 0.0185463309926  
AAGCCTAG -0.843808266968  
AAGCCTAT 0.579786980388  
AAGCCTCA -0.664572112134  
AAGCCTCC -1.34379100326  
AAGCCTCG -0.388089980831  
AAGCCTCT -0.586281528851  
AAGCCTGA -0.735011576483  
AAGCCTGC -0.491818743592  
AAGCCTGG -1.49977700394  
AAGCCTGT -0.376040812117  
AAGCCTTA -0.32301929442  
AAGCCTTC -1.47343444415  
AAGCCTTG -0.627151939012  
AAGCGAAA -0.112430678784  
AAGCGAAC -1.02237214834  
AAGCGAAG -1.03006408589  
AAGCGAAT 3.3716341047  
AAGCGACA 0.810059721094  
AAGCGACC -1.63410832371  
AAGCGACG -0.145542760476  
AAGCGACT -0.752176767133  
AAGCGAGA -0.262101700154  
AAGCGAGC -0.843808266968  
AAGCGAGG -0.25801107821  
AAGCGAGT -0.33611581918  
AAGCGATA 1.54829491677  
AAGCGATC 3.80747562754  
AAGCGATG -0.611962793211  
AAGCGATT 3.54095056667  
AAGCGCAA 0.24818130061  
AAGCGCAC -0.663061849285  
AAGCGCAG -0.368461791421  
AAGCGCAT -0.42124100838  
AAGCGCCA -1.18175637112  
AAGCGCCC -0.759832895399  
AAGCGCCG -1.10088804256  
AAGCGCCT -0.262927404609  
AAGCGCGA 2.65828792577  
AAGCGCGC 0.364130175647  
AAGCGCGG -0.815097589935  
AAGCGCGT -0.942480864177  
AAGCGCTA -0.11808776062  
AAGCGCTC 0.501892912983  
AAGCGCTG 0.0425116251891  
AAGCGCTT -0.25971005857  
AAGCGGAA 0.769189049552  
AAGCGGAC -0.804745049146  
AAGCGGAG -0.291778966321  
AAGCGGAT 2.88907950894  
AAGCGGCA -0.820524133205

AAGCGGCC -0.768795931634  
AAGCGGCG -1.01670434986  
AAGCGGCT -0.799289231138  
AAGCGGGA -0.759370772741  
AAGCGGGC -0.753457536943  
AAGCGGGG 0.135087758104  
AAGCGGGT -0.175344967046  
AAGCGGTA 0.935262550081  
AAGCGGTC -0.433271619001  
AAGCGGTG -0.855776930151  
AAGCGTAA 1.42619886941  
AAGCGTAC -0.185427762029  
AAGCGTAG -0.900826047853  
AAGCGTAT 1.14389707692  
AAGCGTCA -0.704092486363  
AAGCGTCC -1.1298783979  
AAGCGTCG -0.825714910277  
AAGCGTCT -0.764374400593  
AAGCGTGA 0.558782616887  
AAGCGTGC -0.615915405673  
AAGCGTGG -0.441385687819  
AAGCGTGT -0.587032216788  
AAGCGTTA 0.167969562611  
AAGCGTTC -1.02741707448  
AAGCGTTG 1.13588703798  
AAGCTAAA -0.134710845845  
AAGCTAAC -0.927779717812  
AAGCTAAG -0.464843640342  
AAGCTAAT 0.613230493941  
AAGCTACA -0.222154489782  
AAGCTACC -0.210012791984  
AAGCTACG -0.369504442599  
AAGCTACT -0.714258662075  
AAGCTAGA -0.106653622797  
AAGCTAGC -0.0768665763601  
AAGCTAGG -0.119681404198  
AAGCTAGT -0.558987540056  
AAGCTATA 0.595615465568  
AAGCTATC 0.411142530501  
AAGCTATG -1.17905656064  
AAGCTATT 0.913160122504  
AAGCTCAA -0.37216295479  
AAGCTCAC -0.155602031116  
AAGCTCAG -0.670356748188  
AAGCTCAT -0.816032290514  
AAGCTCCA -0.728465797228  
AAGCTCCC -1.16697419646  
AAGCTCCG 0.226869813736  
AAGCTCCT -1.1598363879  
AAGCTCGA -0.932950629883  
AAGCTCGC -0.910681702231  
AAGCTCGG -0.614981489239  
AAGCTCGT -0.796308958204  
AAGCTCTA -0.222143773137

AAGCTCTC -0.572360867925  
AAGCTCTG -1.37774159711  
AAGCTGAA -0.524784712973  
AAGCTGAC -0.564823145521  
AAGCTGAG -0.41468451248  
AAGCTGAT 0.481540435176  
AAGCTGCA -0.91456478719  
AAGCTGCC -0.944836435101  
AAGCTGCG -0.140471696174  
AAGCTGCT -0.711379282437  
AAGCTGGA 0.665373508101  
AAGCTGGC -1.36819332748  
AAGCTGGG -0.668338882283  
AAGCTGGT -0.494267889126  
AAGCTGTA -0.546965032265  
AAGCTGTC -0.23404839783  
AAGCTGTG -0.242738813062  
AAGCTTAA -0.622075124314  
AAGCTTAC 0.451138357849  
AAGCTTAG 0.0473403887541  
AAGCTTAT 0.677173057393  
AAGCTTCA -0.370675170758  
AAGCTTCC -0.263720959128  
AAGCTTCG -1.20465000078  
AAGCTTCT -0.0467954081309  
AAGCTTGA -0.503273791943  
AAGCTTGC 0.958003794274  
AAGCTTGG -0.529264270729  
AAGCTTGT -0.120942570388  
AAGCTTTA -0.812358833594  
AAGCTTTC -0.660643546779  
AAGCTTTG 0.185194086884  
AAGGAAAA 1.23629573173  
AAGGAAAC -0.800422581729  
AAGGAAAG -1.29729749087  
AAGGAAAT 3.88854783374  
AAGGAACA 0.129772040629  
AAGGAACC 0.00707141764037  
AAGGAACG -0.77577795677  
AAGGAACT -0.275062567867  
AAGGAAGA -0.0442168787074  
AAGGAAGC -0.123857759305  
AAGGAAGG -1.70490849466  
AAGGAAGT 0.141931773757  
AAGGAATA 0.843123447192  
AAGGAATC 5.78341775417  
AAGGAATG -0.66020913057  
AAGGAATT 1.9446597161  
AAGGACAA -0.122028088148  
AAGGACAC -0.579138231272  
AAGGACAG -0.548666103678  
AAGGACAT 0.362509348384  
AAGGACCA -0.784026114346  
AAGGACCC -1.16818387048

AAGGACCG -0.913435095941  
AAGGACCT -1.06238313582  
AAGGACGA -0.123746410746  
AAGGACGC -0.480045593841  
AAGGACGG -0.466701540711  
AAGGACGT -0.331933190915  
AAGGACTA -0.223632864077  
AAGGACTC -1.10449772237  
AAGGACTG -0.835740985455  
AAGGACTT -0.365307438346  
AAGGAGAA -0.0680224687501  
AAGGAGAC -1.1139976364  
AAGGAGAG -0.425408476513  
AAGGAGAT 3.78488493914  
AAGGAGCA -0.838933761624  
AAGGAGCC -0.102089377405  
AAGGAGCG -0.238055377664  
AAGGAGCT -1.21159046624  
AAGGAGGA -0.46946957179  
AAGGAGGC -0.8193426884  
AAGGAGGG -0.58718982989  
AAGGAGGT -1.26565829446  
AAGGAGTA -0.52169779635  
AAGGAGTC -0.672873591555  
AAGGAGTG -0.633120064945  
AAGGATAA 1.21965304289  
AAGGATAC 2.2201208909  
AAGGATAG -0.100258660721  
AAGGATAT 5.64461419533  
AAGGATCA 1.86845495794  
AAGGATCC 3.77312198327  
AAGGATCG 1.23173148634  
AAGGATCT 4.95959132591  
AAGGATGA 0.574954296099  
AAGGATGC -0.0763114018547  
AAGGATGG -0.498079355528  
AAGGATGT 0.76205176375  
AAGGATTA 2.4037796223  
AAGGATTC 5.06870664056  
AAGGATTG 2.82641693116  
AAGGCAAA -0.177790191856  
AAGGCAAC -0.725581451339  
AAGGCAAG -0.330407767934  
AAGGCAAT 0.690741637312  
AAGGCACA -1.45478565157  
AAGGCACC -0.386148438351  
AAGGCACG -1.25841697879  
AAGGCACT -0.994805277163  
AAGGCAGA -0.268626568882  
AAGGCAGC -0.669596911895  
AAGGCAGG -0.877530151918  
AAGGCAGT 0.920510434305  
AAGGCATA 0.0276285572345  
AAGGCATC -0.650399479352



AAGGCATG -0.440954146808  
AAGGCATT -0.669543851431  
AAGGCCAA -0.982241448091  
AAGGCCAC -0.0376081064882  
AAGGCCAG -1.7838486112  
AAGGCCAT -1.02929039637  
AAGGCCCA -0.363406148632  
AAGGCCCC -1.9737486123  
AAGGCCCG -1.68002496692  
AAGGCCCT -1.63582011177  
AAGGCCGA -0.617714756566  
AAGGCCGC -1.11673822241  
AAGGCCGG -1.16177374827  
AAGGCCGT -1.49860104815  
AAGGCCTA -0.576071441031  
AAGGCCTC -1.57317818313  
AAGGCCTG -1.22953405128  
AAGGCCTT -0.872649112034  
AAGGCGAA -0.501803781859  
AAGGCGAC -1.02060416324  
AAGGCGAG -1.01765630163  
AAGGCGAT 1.66831899224  
AAGGCGCA 0.427988312844  
AAGGCGCC -0.814076110666  
AAGGCGCG -0.618831901498  
AAGGCGCT -0.183852676544  
AAGGCGGA -0.218255721928  
AAGGCGGC -1.13641581294  
AAGGCGGG -0.537133947757  
AAGGCGGT -1.34002658555  
AAGGCGTA 0.159864642149  
AAGGCGTC -0.768345309767  
AAGGCGTG -0.0575499538104  
AAGGCTAA -1.19207414816  
AAGGCTAC -0.420290102142  
AAGGCTAG -0.563188465033  
AAGGCTAT -0.45289484216  
AAGGCTCA -1.42875727245  
AAGGCTCC -1.4489401136  
AAGGCTCG -1.19517805458  
AAGGCTCT -1.38784948472  
AAGGCTGA -1.20107926683  
AAGGCTGC -0.337579556106  
AAGGCTGG -0.716694999911  
AAGGCTGT -1.36824795624  
AAGGCTTA -0.708148083174  
AAGGCTTC -1.6339750191  
AAGGCTTG -1.2403406119  
AAGGGAAG 0.192700443496  
AAGGGAAC -1.0490035348  
AAGGGAAG -1.55502131071  
AAGGGAAT 1.65907863014  
AAGGGAAC 0.292122160354  
AAGGGAAC -1.24770529969

AAGGGACG -0.214400866182  
AAGGGACT -0.602577102939  
AAGGGAGA -1.45047128698  
AAGGGAGC -1.25652274637  
AAGGGAGG -1.03151632202  
AAGGGAGT -0.545667272652  
AAGGGATA 2.2884763598  
AAGGGATC 1.61341500431  
AAGGGATG -1.01559347809  
AAGGGATT 3.12348495403  
AAGGGCAA -1.19037856576  
AAGGGCAC -1.39945012262  
AAGGGCAG -1.14875511522  
AAGGGCAT 0.122712907924  
AAGGGCCA -1.27296077343  
AAGGGCCC -0.466583918994  
AAGGGCCG -0.870699205344  
AAGGGCCT -1.44288233379  
AAGGGCGA -0.714936947311  
AAGGGCGC -0.728000537991  
AAGGGCGG -0.223719381385  
AAGGGCGT -1.17573675301  
AAGGGCTA -0.805398764513  
AAGGGCTC -1.80084076724  
AAGGGCTG -1.34735049781  
AAGGGGAA -0.0534376371942  
AAGGGGAC -1.03603456425  
AAGGGGAG -0.589189137701  
AAGGGGAT 1.16652932499  
AAGGGGCA -0.914927846223  
AAGGGGCC -1.5098459457  
AAGGGGCG -0.947813048692  
AAGGGGCT -1.8267421149  
AAGGGGGA 0.241294418375  
AAGGGGGC -1.52525256099  
AAGGGGGG -1.49190654277  
AAGGGGGT -0.86804513664  
AAGGGGTA -0.529407507842  
AAGGGGTC -1.41317997499  
AAGGGGTG -0.499085413283  
AAGGGTAA 0.113057471846  
AAGGGTAC -0.984193184452  
AAGGGTAG -0.449661551844  
AAGGGTAT 0.897520093454  
AAGGGTCA -1.11786922057  
AAGGGTCC -1.49709130806  
AAGGGTCG -1.40325819106  
AAGGGTCT -0.504998387699  
AAGGGTGA -1.21089728226  
AAGGGTGC -0.822875783405  
AAGGGTGG -0.23396972197  
AAGGGTGT -0.85878281848  
AAGGGTTA 0.0537722056343  
AAGGGTTC -1.0211258809

AAGGGTTG -0.614107167807  
AAGGTAAA 1.39030856276  
AAGGTAAC -0.811366106301  
AAGGTAAG -0.152201195199  
AAGGTAAT 2.57476814232  
AAGGTACA -0.564210467065  
AAGGTACC -0.0689490665004  
AAGGTACG -0.833988683249  
AAGGTACT -0.544293450994  
AAGGTAGA 0.298478699335  
AAGGTAGC -1.20093707524  
AAGGTAGG 0.339057407638  
AAGGTAGT -0.182321764549  
AAGGTATA 0.223305091559  
AAGGTATC 3.03690805146  
AAGGTATG 0.116472160989  
AAGGTATT 0.56773389095  
AAGGTCAA -0.862380474738  
AAGGTCAC -0.938117359849  
AAGGTCAG -0.279461097329  
AAGGTCAT -0.805878138356  
AAGGTCCA -1.55782698074  
AAGGTCCC -1.15522666211  
AAGGTCCG -1.11585161604  
AAGGTCCT -1.18610001045  
AAGGTCGA 0.362168245404  
AAGGTCGC -0.480489419788  
AAGGTCGG -0.460951929791  
AAGGTCGT -0.0151993396831  
AAGGTCTA -0.499338692047  
AAGGTCTC -1.24346647438  
AAGGTCTG -0.542120063041  
AAGGTGAA 0.00564113755875  
AAGGTGAC -1.20609099751  
AAGGTGAG -0.149183021934  
AAGGTGAT 1.48730335152  
AAGGTGCA -0.395039071885  
AAGGTGCC -0.654685353346  
AAGGTGCG -1.07083281861  
AAGGTGCT 0.121455401076  
AAGGTGGA -0.0949369314702  
AAGGTGGC -1.45289899923  
AAGGTGGG -1.20609517962  
AAGGTGGT -0.964003024616  
AAGGTGTA -0.11146408965  
AAGGTGTC -0.555309378268  
AAGGTGTG 0.315233782265  
AAGGTTAA 0.87596761275  
AAGGTTAC -0.029985696448  
AAGGTTAG -0.365709443238  
AAGGTTAT 0.0779706522125  
AAGGTTCA -0.321501451504  
AAGGTTCC -0.97851859005  
AAGGTTCCG 0.146301812625

AAGGTTCT -0.601857258029  
AAGGTTGA 1.17723734474  
AAGGTTGC -0.859393405883  
AAGGTTGG -0.00522815464045  
AAGGTTGT -0.303503237714  
AAGGTTTA 1.16692793192  
AAGGTTTC 0.171487758865  
AAGGTTTG -0.494727397968  
AAGTAAAA 1.06166825716  
AAGTAAAC 1.02648263529  
AAGTAAAG 0.833357708082  
AAGTAAAT 2.14686242606  
AAGTAACA 1.05374891763  
AAGTAACC 0.0145014508275  
AAGTAACG 0.179882290133  
AAGTAACT -0.51605979537  
AAGTAAGA 0.685989197172  
AAGTAAGC 1.36785666799  
AAGTAAGG 0.261662056313  
AAGTAAGT 0.669741194535  
AAGTAATA 1.47091943045  
AAGTAATC 5.59935466545  
AAGTAATG 1.41840499305  
AAGTAATT 2.08912689132  
AAGTACAA 0.8269486314  
AAGTACAC 0.167378840209  
AAGTACAG 0.802888717067  
AAGTACAT 0.437533445889  
AAGTACCA 0.37614954686  
AAGTACCC -0.426825164751  
AAGTACCG -0.73687235205  
AAGTACCT -0.00705834856068  
AAGTACGA 2.91582041429  
AAGTACGC -0.544136360656  
AAGTACGG -0.0239049150483  
AAGTACGT 0.737973814086  
AAGTACTA 0.242539117525  
AAGTACTC 0.023943076761  
AAGTACTG 0.32499873723  
AAGTACTT 0.481571016823  
AAGTAGAA 0.0845768106158  
AAGTAGAC -0.747383028702  
AAGTAGAG -0.29391889743  
AAGTAGAT 3.65801083624  
AAGTAGCA 1.1420739403  
AAGTAGCC -0.836972092762  
AAGTAGCG 0.44488872394  
AAGTAGCT -0.306036809503  
AAGTAGGA 0.0667775082185  
AAGTAGGC -0.644404431115  
AAGTAGGG 0.621895293778  
AAGTAGGT 0.838875473528  
AAGTAGTA 0.0924119852735  
AAGTAGTC 0.390580424657

AAGTAGTG -0.450011280417  
AAGTATAA 1.22321227605  
AAGTATAC 0.876834615497  
AAGTATAG 0.534842153942  
AAGTATAT 2.18593949711  
AAGTATCA 1.85983825232  
AAGTATCC 1.05148273921  
AAGTATCG 1.42350977557  
AAGTATCT 2.87441234219  
AAGTATGA 1.16949234674  
AAGTATGC 0.799267797847  
AAGTATGG 0.518957733101  
AAGTATGT 0.841592796578  
AAGTATTA 0.518653746307  
AAGTATTC 1.65486385193  
AAGTATTG 0.337794934539  
AAGTCAAA 0.317393055612  
AAGTCAAC -0.806591187344  
AAGTCAAG -0.910509713142  
AAGTCAAT 0.17149350926  
AAGTCACA 0.711027985575  
AAGTCACC -0.824766617855  
AAGTCACG 0.147423923807  
AAGTCACT 0.056994779305  
AAGTCAGA 0.499193363881  
AAGTCAGC -0.524472100587  
AAGTCAGG -0.295206724543  
AAGTCAGT -0.169810473177  
AAGTCATA 0.0634603144108  
AAGTCATC -0.331844843937  
AAGTCATG -0.417593428238  
AAGTCATT -0.0793465649226  
AAGTCCAA -0.278815223411  
AAGTCCAC -0.982776496214  
AAGTCCAG -0.0702661683518  
AAGTCCAT -0.261043104699  
AAGTCCCA -0.318481448569  
AAGTCCCC -1.28351849877  
AAGTCCCG -0.796926602911  
AAGTCCCT 0.0278881091572  
AAGTCCGA -0.890278255014  
AAGTCCGC -0.453310961658  
AAGTCCGG -0.450206793849  
AAGTCCGT -0.36377469668  
AAGTCCTA -0.270537529715  
AAGTCCTC -0.328526604603  
AAGTCCTG -0.940389027282  
AAGTCGAA 0.987383608187  
AAGTCGAC 0.255529259976  
AAGTCGAG -0.264326580281  
AAGTCGAT -0.00715924185591  
AAGTCGCA -0.274647232515  
AAGTCGCC -1.36669116746  
AAGTCGCG -0.631141929042

AAGTCGCT -0.272372951267  
AAGTCGGA -0.410106152482  
AAGTCGGC -0.966441192124  
AAGTCGGG -1.15079101646  
AAGTCGGT 0.10220177149  
AAGTCGTA 0.183547905606  
AAGTCGTC 0.284329852278  
AAGTCGTG 0.143921933213  
AAGTCTAA -0.209391226554  
AAGTCTAC -0.541303506942  
AAGTCTAG -0.649141711122  
AAGTCTAT 1.02061305021  
AAGTCTCA 0.160419816654  
AAGTCTCC -1.16650945999  
AAGTCTCG -0.749525835008  
AAGTCTCT -0.579799003941  
AAGTCTGA 0.0375968670797  
AAGTCTGC -0.194084720418  
AAGTCTGG -1.12101756187  
AAGTCTGT -0.661705278813  
AAGTCTTA 0.715239627197  
AAGTCTTC 0.912170793171  
AAGTCTTG -0.316650209122  
AAGTGAAA 0.903353085102  
AAGTGAAC -1.44540152959  
AAGTGAAG -0.63358009655  
AAGTGAAT 2.41874476408  
AAGTGACA 0.758334394722  
AAGTGACC -0.544082254666  
AAGTGACG 0.0897077313034  
AAGTGACT 0.056994779305  
AAGTGAGA 0.61197899887  
AAGTGAGC -0.368915549868  
AAGTGAGG -0.559251796848  
AAGTGAGT 0.0949680358799  
AAGTGATA 1.17972569752  
AAGTGATC 1.24317451114  
AAGTGATG 1.2247878843  
AAGTGATT 3.26068310712  
AAGTGCAA 0.188272639296  
AAGTGCAC -0.444644593531  
AAGTG CAG -0.903857551579  
AAGTG CAT 0.0243531844818  
AAGTGCCA -1.17926801835  
AAGTGCCC -0.659500002305  
AAGTGCCG -0.647205919038  
AAGTG CCT -0.994384191415  
AAGTGCGA 0.166160279219  
AAGTGCGC 1.2754350116  
AAGTGCGG 0.646930422838  
AAGTGCGT -0.699319135696  
AAGTGCTA -0.81571837122  
AAGTGCTC -1.08727633468  
AAGTGCTG -0.790877971447

AAGTGGAA 0.426775502249  
AAGTGGAC -0.0957785802024  
AAGTGGAG -0.805454700174  
AAGTGGAT 3.9705594454  
AAGTGGCA -0.81256637058  
AAGTGGCC -0.830558311212  
AAGTGGCG -0.760465700238  
AAGTGGCT -0.500131462422  
AAGTGGGA -0.821157460807  
AAGTGGGC -0.378730951481  
AAGTGGGG -0.80044244673  
AAGTGGGT -0.772917657988  
AAGTGGTA 1.7398646235  
AAGTGGTC -0.727376358745  
AAGTGGTG 0.318461060805  
AAGTGTA 0.97697382483  
AAGTGTAAC 0.30266943043  
AAGTGTAG 0.469210281249  
AAGTGTAAT 0.932335598993  
AAGTGTC 0.932335598993  
AAGTGTC 0.932335598993  
AAGTGTC -1.19198527842  
AAGTGTC 0.0629971462265  
AAGTGTCG 1.66567485604  
AAGTGTC 0.681783828709  
AAGTGTC 0.309828149522  
AAGTGTC -0.041851375283  
AAGTGTCG 0.389310632874  
AAGTGTC -0.0374946668765  
AAGTGTTA 0.442352799717  
AAGTGTT -0.779338758223  
AAGTGTTG 0.910007076337  
AAGTTAAA 1.22703550463  
AAGTTAAC 1.16832370963  
AAGTTAAG -0.163776479083  
AAGTTAAT 0.685745850908  
AAGTTACA 0.0765241664721  
AAGTTACC 1.18842264729  
AAGTTACG 0.198486909221  
AAGTTACT -0.345649974198  
AAGTTAGA -0.321520793742  
AAGTTAGC 0.40381835686  
AAGTTAGG -0.0482588836749  
AAGTTAGT 0.206322606642  
AAGTTATA 1.30057782988  
AAGTTATC 0.743647362962  
AAGTTATG 1.95298210605  
AAGTTATT 1.39414564456  
AAGTTCAA -0.0100459401785  
AAGTTCAC -0.363608196605  
AAGTTCAG 1.76111703813  
AAGTTCAT 1.44822549633  
AAGTTCCA -0.251974993063  
AAGTTCCC -0.581357883767  
AAGTTCCG 0.268044733454  
AAGTTCCT -0.836747827354

AAGTTCGA 1.28630691761  
AAGTTCGC 0.570414620577  
AAGTTCGG -0.413193591868  
AAGTTCGT 0.0928168653624  
AAGTTCTA 0.503908426453  
AAGTTCTC -0.365866533576  
AAGTTCTG 0.145649665548  
AAGTTGAA 0.132995398445  
AAGTTGAC 0.320364441571  
AAGTTGAG -0.222898904562  
AAGTTGAT 2.40903705168  
AAGTTGCA 0.592410665845  
AAGTTGCC -0.187838223087  
AAGTTGCG 0.788067335168  
AAGTTGCT 0.0836259043774  
AAGTTGGA 0.741593165016  
AAGTTGGC -0.280343260208  
AAGTTGGG -0.391358557662  
AAGTTGGT -0.371113246309  
AAGTTGTA 1.03528753566  
AAGTTGTC -0.427424251365  
AAGTTGTG -0.373123270766  
AAGTTTAA 0.126793074604  
AAGTTTAC -0.315549792612  
AAGTTTAG 0.414218730479  
AAGTTTAT 1.55617923117  
AAGTTTCA 0.181347072585  
AAGTTTCC 0.00586592572948  
AAGTTTCG 0.394465600668  
AAGTTTCT -0.199799044823  
AAGTTTGA 1.10821718245  
AAGTTTGC 0.8097031966  
AAGTTTGG 0.175952679251  
AAGTTTGT -0.241202934817  
AAGTTTTA 0.60243961622  
AAGTTTTC 0.432353908225  
AAGTTTTG -0.313340072618  
AATAAAAA 2.08170208577  
AATAAAAC 1.19759295913  
AATAAAAG 1.08434154214  
AATAAAAT 3.34509681562  
AATAAACA 3.13937564803  
AATAAACC -0.468867871361  
AATAAACG 1.03097683041  
AATAAACT 1.08807093472  
AATAAAGA 1.75308138379  
AATAAAGC 0.750753282973  
AATAAAGG 0.166423751865  
AATAAAGT 1.84889159116  
AATAAATA 2.50918201141  
AATAAATC 3.80192231419  
AATAAATG 1.55207083528  
AATAAATT 1.49140991774  
AATAACAA 0.478870422195



AATAACAC 0.389593447758  
AATAACAG 1.20930782079  
AATAACAT 1.18749840198  
AATAACCA 0.928197144217  
AATAACCC 0.479697433558  
AATAACCG -0.00263420370295  
AATAACCT 0.110157181681  
AATAACGA 1.50209885664  
AATAACGC 0.24206601684  
AATAACGG 0.910209908454  
AATAACGT 1.32036232548  
AATAACTA 0.559870487081  
AATAACTC 0.85652787947  
AATAACTG 2.3970940039  
AATAAGAA 1.67063300349  
AATAAGAC -0.615625794867  
AATAAGAG -0.116017095634  
AATAAGAT 4.97684460216  
AATAAGCA -0.0319348189934  
AATAAGCC 0.0988704630762  
AATAAGCG -0.188339552984  
AATAAGCT 0.32571858214  
AATAAGGA 1.88333619622  
AATAAGGC 1.23997023418  
AATAAGGG 0.827534126171  
AATAAGGT -0.0446298616257  
AATAAGTA 1.79368361644  
AATAAGTC 0.732486891668  
AATAAGTG 0.593945759946  
AATAATAA 4.27395786909  
AATAATAC 2.22261656236  
AATAATAG 2.52167761989  
AATAATAT 4.03167046204  
AATAATCA 1.94190893621  
AATAATCC 3.67307896237  
AATAATCG 2.02283685978  
AATAATCT 2.87565338199  
AATAATGA 1.11098808873  
AATAATGC 1.79843082894  
AATAATGG 0.661789443686  
AATAATGT 1.92309416632  
AATAATTA 2.99090802752  
AATAATTC 1.76112853892  
AATAATTG 1.13058804892  
AATACAAA 2.97637782472  
AATACAAC 1.88898334556  
AATACAAG 2.81645201927  
AATACAAT 1.52530718974  
AATACACA 2.3087807434  
AATACACC 1.640571245  
AATACACG 0.343945243443  
AATACACT 0.129054025391  
AATACAGA 0.753967753815  
AATACAGC 0.271035984414

AATACAGG 0.884668744628  
AATACAGT 0.0631623393938  
AATACATA 1.48770535641  
AATACATC 1.59549990986  
AATACATG 0.300410570696  
AATACATT 2.49000575078  
AATACCAA 0.750794842647  
AATACCAC 1.35298144148  
AATACCAG 0.267367755126  
AATACCAT 0.717843772016  
AATACCCA 1.41566675947  
AATACCCC 0.279122085402  
AATACCCG 0.239822317238  
AATACCCT 1.1420739403  
AATACCGA 1.2299739565  
AATACCGC 1.17544060767  
AATACCGG -0.292001924821  
AATACCGT 0.917192717734  
AATACCTA 1.70199435127  
AATACCTC 0.211922445909  
AATACCTG 0.758334394722  
AATACGAA 1.74548537329  
AATACGAC 2.19941267275  
AATACGAG 1.4666500235  
AATACGAT 4.31552669087  
AATACGCA 1.8019788227  
AATACGCC 1.27982125612  
AATACGCG 2.31225633445  
AATACGCT 1.43087838409  
AATACGGA 1.79656979199  
AATACGGC 1.26428708662  
AATACGGG 0.537370236718  
AATACGGT 1.0253492847  
AATACGTA 1.63730109988  
AATACGTC 1.24420147942  
AATACGTG 0.892325657039  
AATACTAA 1.85580147498  
AATACTAC 0.612108121377  
AATACTAG 1.01345799046  
AATACTAT 1.02077249299  
AATACTCA 0.629715046921  
AATACTCC 1.15306451356  
AATACTCG 0.840728146266  
AATACTCT 0.70489231404  
AATACTGA 1.80274728458  
AATACTGC 1.61699201142  
AATACTGG 0.947025244568  
AATACTGT 0.057795391127  
AATACTTA 1.88711237611  
AATACTTC 1.65726699431  
AATACTTG 0.137151365787  
AATAGAAA 0.711129401633  
AATAGAAC 0.0674944779305  
AATAGAAG 0.22965666429

AATAGAAT 2.5600011278  
AATAGACA 0.470173733804  
AATAGACC -1.09277240545  
AATAGACG -0.376585531358  
AATAGACT -0.0344435595313  
AATAGAGA 2.86686756248  
AATAGAGC 0.102059579903  
AATAGAGG 0.893132542019  
AATAGAGT -0.25713205191  
AATAGATA 0.989261112176  
AATAGATC 1.7762980811  
AATAGATG 0.260152054846  
AATAGATT 6.49630625393  
AATAGCAA 1.18087028752  
AATAGCAC 0.0665469696528  
AATAGCAG -0.799164813499  
AATAGCAT 1.6184847617  
AATAGCCA -0.51674356962  
AATAGCCC 0.137742088189  
AATAGCCG 0.126118710092  
AATAGCCT 0.0436261563053  
AATAGCGA 0.36346156153  
AATAGCGC -0.145850406612  
AATAGCGG 0.546699991329  
AATAGCGT 0.351068937402  
AATAGCTA 0.529070848349  
AATAGCTC -0.316064191589  
AATAGCTG 0.15110104007  
AATAGGAA 1.61045930124  
AATAGGAC -0.303000339528  
AATAGGAG 0.0913536511999  
AATAGGAT 5.02679802271  
AATAGGCA -0.184278205779  
AATAGGCC -0.842395760834  
AATAGGCG -0.552278397305  
AATAGGCT 0.0752964571257  
AATAGGGA 1.27857368178  
AATAGGGC -0.595347288052  
AATAGGGG 0.31605295218  
AATAGGGT 0.169096117281  
AATAGGTA 0.642084669469  
AATAGGTC 0.427856576521  
AATAGGTG 0.332259395145  
AATAGTAA 1.38511072838  
AATAGTAC -0.00390268857797  
AATAGTAG 1.75795902571  
AATAGTAT 0.545292712828  
AATAGTCA 1.01421678123  
AATAGTCC 0.189510803907  
AATAGTCG 0.0298513463087  
AATAGTCT -0.0769925622883  
AATAGTGA 0.0559320017444  
AATAGTGC -0.208171620037  
AATAGTGG 1.34637815828

AATAGTGT -0.178825262968  
AATAGTTA 1.60547789083  
AATAGTTC 0.292672368609  
AATAGTTG 0.916729026787  
AATATAAA 2.91917550842  
AATATAAC 2.22051766816  
AATATAAG 1.49207173593  
AATATAAT 1.88479731933  
AATATAACA 2.644972886  
AATATAACC 2.65596032268  
AATATACG 2.85980581596  
AATATACT 3.64513726998  
AATATAGA 3.05346108642  
AATATAGC 1.19491066121  
AATATAGG 2.10755403231  
AATATAGT 1.75109096295  
AATATATA 2.99628647657  
AATATATC 4.40267967848  
AATATATG 2.67344962651  
AATATATT 3.01933588967  
AATATCAA 6.09846804656  
AATATCAC 5.38708641169  
AATATCAG 4.99076238789  
AATATCAT 4.35265646904  
AATATCCA 8.36826660043  
AATATCCC 4.62971599229  
AATATCCG 9.08213841775  
AATATCCT 6.49135542517  
AATATCGA 6.33368482012  
AATATCGC 4.32977041945  
AATATCGG 5.36644928933  
AATATCGT 5.44751600652  
AATATCTA 6.88717890321  
AATATCTC 9.71195200553  
AATATCTG 12.3092705835  
AATATGAA 1.15628813276  
AATATGAC 2.521627696  
AATATGAG 2.62112103142  
AATATGAT 2.51056132208  
AATATGCA 2.30255672488  
AATATGCC 0.997473983237  
AATATGCG 2.54636275899  
AATATGCT 1.28591850457  
AATATGGA 1.83920112995  
AATATGGC 2.55174565154  
AATATGGG 0.804907367116  
AATATGGT 2.44721052656  
AATATGTA 2.26627120926  
AATATGTC 1.3812861929  
AATATGTG 1.68594552141  
AATATTAA 3.80717477732  
AATATTAC 5.16654543049  
AATATTAG 1.3815687464  
AATATTAT 3.5966640534

AATATTCA 2.56824222807  
AATATTCC 7.82596357027  
AATATTCT 4.07876201552  
AATATTCT 6.26927464499  
AATATTGA 3.97731772789  
AATATTGC 2.45114797889  
AATATTGG 3.92724119661  
AATATTGT 3.05129527853  
AATATTTA 2.52018199441  
AATATTTT 6.01405669049  
AATATTTG 4.14303888603  
AATCAAAA 2.59945981597  
AATCAAAC 2.78572321495  
AATCAAAG 2.57460713126  
AATCAAAT 3.58654806296  
AATCAACA 1.9867594039  
AATCAACC 1.37983813887  
AATCAACG 2.23993884335  
AATCAACT 3.03936111772  
AATCAAGA 2.8649430098  
AATCAAGC 1.79279465763  
AATCAAGG 2.9028705246  
AATCAAGT 2.12634083437  
AATCAATA 2.56669615594  
AATCAATC 3.11072430462  
AATCAATG 1.41429398334  
AATCAATT 2.35229528976  
AATCACAA 6.89449549679  
AATCACAC 2.79411565517  
AATCACAG 3.96508140995  
AATCACAT 3.95177734821  
AATCACCA 2.79893004275  
AATCACCC 1.25694200245  
AATCACCG 2.72104198712  
AATCACCT 1.82026612453  
AATCACGA 2.87748122348  
AATCACGC 2.98207489793  
AATCACGG 2.9159537189  
AATCACGT 5.03487968021  
AATCACTA 2.34351077715  
AATCACTC 1.11736475409  
AATCACTG 3.70707059312  
AATCAGAA 5.44388018855  
AATCAGAC 2.86429216963  
AATCAGAG 3.43687834849  
AATCAGAT 4.17331863677  
AATCAGCA 4.14051106463  
AATCAGCC 2.46807766472  
AATCAGCG 3.14256005999  
AATCAGCT 1.79409137172  
AATCAGGA 5.85207720987  
AATCAGGC 3.40728733825  
AATCAGGG 2.05941355449  
AATCAGGT 3.63251645972

AATCAGTA 4.73754086601  
AATCAGTC 1.94783968457  
AATCAGTG 4.09549618792  
AATCATAA 3.56973077121  
AATCATAC 2.58924580743  
AATCATAG 2.2077917825  
AATCATAT 4.19850144643  
AATCATCA 2.55674091518  
AATCATCC 1.88242894071  
AATCATCG 1.88214978517  
AATCATCT 2.48174295583  
AATCATGA 1.9959686616  
AATCATGC 0.673088708607  
AATCATGG 2.88757970136  
AATCATGT 2.95993091068  
AATCATT 3.17773993147  
AATCATTC 2.26545334625  
AATCATTG 1.32628209582  
AATCCAAA 7.82338948434  
AATCCAAC 3.71936650606  
AATCCAAG 5.27559566112  
AATCCAAT 7.59956685722  
AATCCACA 6.0675680373  
AATCCACC 4.1136167283  
AATCCACG 8.82544365724  
AATCCACT 5.58446218776  
AATCCAGA 3.01666927465  
AATCCAGC 4.51137364599  
AATCCAGG 6.82924445708  
AATCCAGT 6.17850152231  
AATCCATA 5.09109475822  
AATCCATC 4.84186244222  
AATCCATG 6.82495701479  
AATCCATT 5.39409745018  
AATCCCAA 6.75736347324  
AATCCCAC 3.51381497512  
AATCCCAG 5.64253595028  
AATCCCAT 4.07523231847  
AATCCCCA 4.11661425241  
AATCCCCC 2.38983517565  
AATCCCCG 6.36386550723  
AATCCCCT 2.75475498509  
AATCCCGA 6.39525482284  
AATCCCGC 5.30644313268  
AATCCCGG 3.86398658951  
AATCCCGT 4.28901527857  
AATCCCTA 3.76150148037  
AATCCCTC 3.07558729972  
AATCCCTG 3.43612400121  
AATCCGAA 6.94690694985  
AATCCGAC 6.88393228244  
AATCCGAG 5.42454291685  
AATCCGAT 9.39180660173  
AATCCGCA 4.57790728519

AATCCGCC 8.28648212938  
AATCCGCG 4.45993322556  
AATCCGCT 4.17891952156  
AATCCGGA 5.39965468425  
AATCCGGC 4.452022773  
AATCCGGG 6.92756784848  
AATCCGGT 6.47114540033  
AATCCGTA 4.09498597105  
AATCCGTC 6.71539395348  
AATCCGTG 3.18061408348  
AATCCTAA 5.73298522117  
AATCCTAC 3.51276892598  
AATCCTAG 4.40963870203  
AATCCTAT 6.28058175136  
AATCCTCA 5.22265125099  
AATCCTCC 4.94993667398  
AATCCTCG 2.45741617089  
AATCCTCT 6.06446596054  
AATCCTGA 9.26779645696  
AATCCTGC 4.98738716737  
AATCCTGG 4.6285371613  
AATCCTGT 4.41222036803  
AATCCTTA 5.35761877356  
AATCCTTC 3.14537043489  
AATCCTTG 4.75238472672  
AATCGAAA 3.12816943496  
AATCGAAC 1.8964551998  
AATCGAAG 2.46834662638  
AATCGAAT 4.36924975677  
AATCGACA 0.947738293556  
AATCGACC 1.84535248438  
AATCGACG 3.63258468032  
AATCGACT 2.38221381114  
AATCGAGA 3.18971695886  
AATCGAGC 2.47450137877  
AATCGAGG 3.35691805959  
AATCGAGT 2.37691063998  
AATCGATA 4.21633917192  
AATCGATC 2.50494423163  
AATCGATG 2.04866737303  
AATCGATT 3.41608857928  
AATCGCAA 6.82466139221  
AATCGCAC 2.7355682692  
AATCGCAG 2.98720581862  
AATCGCAT 3.33403880591  
AATCGCCA 2.98923649223  
AATCGCCC 2.03209107511  
AATCGCCG 3.38621945902  
AATCGCCT 1.64817091484  
AATCGCGA 6.82129296761  
AATCGCGC 5.52556036834  
AATCGCGG 4.96359830575  
AATCGCGT 4.11449758427  
AATCGCTA 2.92410751772

AATCGCTC 1.85389600316  
AATCGCTG 2.5817438943  
AATCGGAA 3.91418910672  
AATCGGAC 2.05116539692  
AATCGGAG 3.67139775596  
AATCGGAT 4.67117712485  
AATCGGCA 2.57772410677  
AATCGGCC 1.83589177759  
AATCGGCG 4.43627087263  
AATCGGCT 2.0440908427  
AATCGGGA 3.59147406047  
AATCGGGC 2.52079388872  
AATCGGGG 4.31272677124  
AATCGGGT 2.90663703337  
AATCGGTA 3.48235613201  
AATCGGTC 1.42056452777  
AATCGGTG 1.14733293797  
AATCGTAA 5.59889960009  
AATCGTAC 2.32332950429  
AATCGTAG 3.58489116503  
AATCGTAT 6.1655448367  
AATCGTCA 3.45468157161  
AATCGTCC 3.41388983731  
AATCGTCG 4.12132121216  
AATCGTCT 2.78938517108  
AATCGTGA 4.73978299732  
AATCGTGC 5.11641296355  
AATCGTGG 3.62487862817  
AATCGTGT 4.21177858587  
AATCGTTA 1.42138840256  
AATCGTTC 2.03926626124  
AATCGTTG 0.990744975484  
AATCTAAA 4.89786005075  
AATCTAAC 6.78034179054  
AATCTAAG 8.1184197763  
AATCTAAT 7.70173569463  
AATCTACA 8.83716688311  
AATCTACC 5.23610822097  
AATCTACG 7.28694715228  
AATCTACT 5.51981415538  
AATCTAGA 14.7840309914  
AATCTAGC 6.61996196527  
AATCTAGG 6.32750392957  
AATCTAGT 8.48025240774  
AATCTATA 6.08146360559  
AATCTATC 7.67050268522  
AATCTATG 5.97886348855  
AATCTCAA 6.46240558397  
AATCTCAC 8.60148485032  
AATCTCAG 9.01313498387  
AATCTCAT 7.89768589548  
AATCTCCA 4.45318592109  
AATCTCCC 4.70171642751  
AATCTCCG 7.85782441827



AATCTCCT 7.02637035234  
AATCTCGA 10.4063169145  
AATCTCGC 9.13646161578  
AATCTCGG 10.5360071427  
AATCTCGT 6.88334835596  
AATCTCTA 4.91180188358  
AATCTCTC 2.98759057233  
AATCTCTG 6.14964133501  
AATCTGAA 7.17692170692  
AATCTGAC 8.70018306292  
AATCTGAG 6.67544046995  
AATCTGAT 9.11786614505  
AATCTGCA 7.65222531588  
AATCTGCC 6.54170692988  
AATCTGCG 10.3043550913  
AATCTGCT 4.40593387932  
AATCTGGA 7.91524524958  
AATCTGGC 4.96294380624  
AATCTGGG 10.3576646515  
AATCTGGT 9.55930280228  
AATCTGTA 8.63797006148  
AATCTGTC 4.9465381905  
AATCTGTG 6.59723065358  
AATCTTAA 7.99625969045  
AATCTTAC 7.75800174205  
AATCTTAG 5.4432560093  
AATCTTAT 5.9183348301  
AATCTTCA 6.04419607932  
AATCTTCC 4.05311185557  
AATCTTCG 6.36321911055  
AATCTTCT 6.78986444477  
AATCTTGA 5.14221969107  
AATCTTGC 5.21324647986  
AATCTTGG 6.60899413221  
AATCTTGT 6.09450445607  
AATCTTTA 6.1286910775  
AATCTTTC 5.65049554258  
AATCTTTG 5.69364127951  
AATGAAAA 0.0445336731992  
AATGAAAC 0.955445391233  
AATGAAAG 0.591817591009  
AATGAAAT 1.65427417506  
AATGAACA 0.327569425206  
AATGAACC -0.308932656182  
AATGAACG -0.0255746206699  
AATGAACT 1.2754350116  
AATGAAGA 0.891889411159  
AATGAAGC 0.18009662304  
AATGAAGG -0.292907873425  
AATGAAGT -0.959179488683  
AATGAATA 2.92920550433  
AATGAATC 4.21014599644  
AATGAATG 0.0681887074438  
AATGAATT 1.62315460526

AATGACAA 0.685790808542  
AATGACAC -0.195747630118  
AATGACAG -0.396462033282  
AATGACAT 2.00369928362  
AATGACCA -0.376223779232  
AATGACCC -0.545207502428  
AATGACCG -0.579175086077  
AATGACCT -0.705971820023  
AATGACGA -0.426861235411  
AATGACGC 0.071274578541  
AATGACGG 0.232148415024  
AATGACGT 0.705864130806  
AATGACTA 0.490011028489  
AATGACTC -0.379354607964  
AATGACTG -0.315304616677  
AATGAGAA 1.53639369004  
AATGAGAC -1.06587597806  
AATGAGAG 0.242673990427  
AATGAGAT 4.67158174356  
AATGAGCA -0.672369125079  
AATGAGCC -0.392429438052  
AATGAGCG -0.86043579568  
AATGAGCT -0.814862869263  
AATGAGGA 0.30266943043  
AATGAGGC -0.893915641274  
AATGAGGG -0.435351955106  
AATGAGGT 1.5041784086  
AATGAGTA 1.42507231474  
AATGAGTC 0.752765398483  
AATGAGTG -0.629418378812  
AATGATAA 1.47007699757  
AATGATAC 2.0773291717  
AATGATAG 1.24346020122  
AATGATAT 3.44179023141  
AATGATCA 0.785729799574  
AATGATCC 0.800888102347  
AATGATCG 0.316719998008  
AATGATCT 2.61935592151  
AATGATGA 0.71229490216  
AATGATGC -0.217523853466  
AATGATGG -0.121636799902  
AATGATGT 1.32766898655  
AATGATTA 1.17201415635  
AATGATTC 3.47642224707  
AATGATTG 2.08966376911  
AATGCAAA 0.640894599073  
AATGCAAC 0.682851572519  
AATGCAAG 0.439334887834  
AATGCAAT 3.34501813976  
AATGCACA 1.12400881283  
AATGCACC -0.180105771396  
AATGCACG 0.682851572519  
AATGCACT 0.111574915446  
AATGCAGA 0.598295672431

AATGCAGC 0.107558003111  
AATGCAGG 0.258803325821  
AATGCAGT 0.394759916343  
AATGCATA 2.24241621809  
AATGCATC -0.178784487439  
AATGCATG -0.70163366971  
AATGCATT 2.01332779739  
AATGCCAA -0.0737545671035  
AATGCCAC -0.696438187768  
AATGCCAG 0.616968773497  
AATGCCAT -0.0763155839602  
AATGCCCA -0.583544602181  
AATGCCCC -0.377962750976  
AATGCCCG -1.59237770672  
AATGCCCT 0.216594903281  
AATGCCGA 0.532661970067  
AATGCCGC -0.795652106259  
AATGCCGG -0.323855454139  
AATGCCGT 0.343099412605  
AATGCCTA 0.281177590256  
AATGCCTC -1.2877413798  
AATGCCTG 0.0349906312073  
AATGCGAA 1.90540647386  
AATGCGAC 0.682522754474  
AATGCGAG -0.0309690140041  
AATGCGAT 4.91777602129  
AATGCGCA -0.0186997619882  
AATGCGCC 0.87170055823  
AATGCGCG 0.898524582919  
AATGCGCT 0.234543454568  
AATGCGGA -0.443969706256  
AATGCGGC 0.317646072995  
AATGCGGG 0.275054465038  
AATGCGGT 0.342568285207  
AATGCGTA 0.811990285547  
AATGCGTC 0.539802392449  
AATGCGTG 0.126505032087  
AATGCTAA 1.10137185989  
AATGCTAC 0.12954908213  
AATGCTAG -0.418835774953  
AATGCTAT 2.12557367939  
AATGCTCA -0.0790318614836  
AATGCTCC -0.800578365159  
AATGCTCG -0.647734694002  
AATGCTCT -0.870161282024  
AATGCTGA 0.993573647093  
AATGCTGC -0.318946707806  
AATGCTGG -0.5587355682  
AATGCTGT 1.03072642684  
AATGCTTA -0.56902616155  
AATGCTTC 0.607370318607  
AATGCTTG -0.53772153358  
AATGGAAG 0.613314397433  
AATGGAAC -0.444948580325

AATGGAAG -0.16231326492  
AATGGAAT 2.00257142204  
AATGGACA 0.275391647294  
AATGGACC -0.908596138494  
AATGGACG -1.17675927781  
AATGGACT 0.225177106534  
AATGGAGA 1.08403206633  
AATGGAGC -1.08295700384  
AATGGAGG -0.634274848826  
AATGGAGT 0.716810791957  
AATGGATA 3.03778472532  
AATGGATC 0.967795410161  
AATGGATG 0.105636325633  
AATGGCAA -0.0685264124631  
AATGGCAC -0.347551786675  
AATGGCAG 0.132183285833  
AATGGCAT -0.138998549511  
AATGGCCA -0.649524635157  
AATGGCCC -0.474148825084  
AATGGCCG -1.07795625118  
AATGGCCT -0.557475708918  
AATGGCGA -0.459336591541  
AATGGCGC 0.0907148345845  
AATGGCGG -0.788534424077  
AATGGCGT 0.0375555687878  
AATGGCTA 0.31568727933  
AATGGCTC -0.0835610817421  
AATGGCTG -0.408255570797  
AATGGGAA -0.560966721485  
AATGGGAC -0.840073123991  
AATGGGAG 0.313601715593  
AATGGGAT 1.67160325197  
AATGGGCA -0.967463194156  
AATGGGCC -0.990892917466  
AATGGGCG -1.07175706392  
AATGGGCT -0.971809447298  
AATGGGGA 0.326043740842  
AATGGGGC -0.0449382919065  
AATGGGGG -1.39110682215  
AATGGGGT 0.432983053721  
AATGGGTA 1.08403389601  
AATGGGTC -0.647301584701  
AATGGGTG 0.390610222159  
AATGGTAA 1.77795497902  
AATGGTAC 0.492615957453  
AATGGTAG 1.57093474491  
AATGGTAT 1.15450132818  
AATGGTCA 0.293976139999  
AATGGTCC 0.032010358274  
AATGGTCG -0.829806577748  
AATGGTCT -0.406398454573  
AATGGTGA 1.64711231939  
AATGGTGC -0.741345898029  
AATGGTGG -0.350805987519

AATGGTGT 0.204846846163  
AATGGTTA 0.710087011837  
AATGGTTC 0.0681887074438  
AATGGTTG -0.440072506692  
AATGTAAA 1.02232562242  
AATGTAAC 0.0765241664721  
AATGTAAG 0.922812944765  
AATGTAAT 6.11669653754  
AATGTACA 1.23425538701  
AATGTACC 0.0831428711919  
AATGTACG -0.209260274376  
AATGTACT 0.181150252245  
AATGTAGA 0.650829974837  
AATGTAGC 0.222233688405  
AATGTAGG 0.894765915599  
AATGTAGT 0.436528695042  
AATGTATA 1.83873430243  
AATGTATC 0.394759916343  
AATGTATG 0.512930273547  
AATGTCAA 0.072416293343  
AATGTCAC 0.778572126008  
AATGTCAG -0.0278543909316  
AATGTCAT 2.23241523555  
AATGTCCA -0.545591210608  
AATGTCCC -0.82009206943  
AATGTCCG -0.327986328848  
AATGTCCT 0.393037934402  
AATGTCGA -0.0956800393416  
AATGTCGC 0.23294641303  
AATGTCGG 0.936154384079  
AATGTCGT -0.285162614036  
AATGTCTA 0.937155998347  
AATGTCTC 0.782215001282  
AATGTCTG -0.478555718756  
AATGTGAA 1.74806102752  
AATGTGAC 0.104507679911  
AATGTGAG 0.682888427324  
AATGTGAT 1.3392149957  
AATGTGCA 0.877168399792  
AATGTGCC 0.175896220827  
AATGTGCG 0.790632272749  
AATGTGCT 0.831662909827  
AATGTGGA 0.821748705972  
AATGTGGC -0.319405693885  
AATGTGGG -0.173618018855  
AATGTGGT 0.689069317874  
AATGTGTA 1.37779727139  
AATGTGTC 0.344526033345  
AATGTGTG 0.350511933226  
AATGTTAA 2.40088665082  
AATGTTAC 0.374321182611  
AATGTTAG 0.223232950239  
AATGTTAT 2.31532626127  
AATGTTCA 0.462005036233

AATGTTCC 0.187608730048  
AATGTTCCG 0.0342138051103  
AATGTTCT 1.08941757269  
AATGTTGA 0.804907367116  
AATGTTGC 0.471070272671  
AATGTTGG 0.693700999718  
AATGTTGT 0.313049939048  
AATGTTTA 1.38039122232  
AATGTTTC 1.15250881629  
AATGTTTG 0.0235645962131  
AATTA AAA 1.31921381475  
AATTA AAC 0.590195979601  
AATTA AAG 1.72825614415  
AATTA AAT 2.75120490029  
AATTA ACA 0.885201701698  
AATTA ACC 0.428868123289  
AATTA ACG 0.363321460996  
AATTA ACT 1.56394749214  
AATTA AGA 1.48830653407  
AATTA AGC -0.372065198074  
AATTA AGG -0.0595296580023  
AATTA AGT 1.42813727531  
AATTA ATA 0.518653746307  
AATTA ATC 1.96512040589  
AATTA ATG 1.35915971822  
AATTA ATT 2.22863121422  
AATTA CAA 1.97195840977  
AATTA CAC 3.10500475258  
AATTA CAG 1.95705730648  
AATTA CAT 2.83362949486  
AATTA CCA 1.86676800113  
AATTA CCC 1.67440134193  
AATTA CCG 1.05195061227  
AATTA CCT 3.08305758567  
AATTA CGA 4.17964537825  
AATTA CGC 4.59936410023  
AATTA CGG 2.16559930424  
AATTA CGT 4.85430106951  
AATTA CTA 1.41555828611  
AATTA CTC 1.62811353686  
AATTA CTG 1.10725608233  
AATTA GAA 0.870394173024  
AATTA GAC 0.406548226226  
AATTA GAG 0.458981112573  
AATTA GAT 2.89534508713  
AATTA GCA 1.81053593332  
AATTA GCC -0.0957785802024  
AATTA GCG -0.581682781088  
AATTA GCT -0.141172721609  
AATTA GGA 2.23476322641  
AATTA GGC 1.86612134307  
AATTA GGG 0.420758236576  
AATTA GGT 0.647618901956  
AATTA GTA 1.31860009077

AATTAGTC 0.458580937353  
AATTAGTG 1.79768850522  
AATTATAA 1.75176637299  
AATTATAC 3.32976051199  
AATTATAG 1.41238929566  
AATTATAT 3.25440158466  
AATTATCA 1.79826615854  
AATTATCC 1.60128062519  
AATTATCG 1.68789464395  
AATTATCT 2.6064021111  
AATTATGA 2.14570555113  
AATTATGC 1.74228135771  
AATTATGG 2.35945975925  
AATTATGT 1.40317637862  
AATTATTA 2.8399070966  
AATTATTC 2.0621131036  
AATTATTG 2.3859037351  
AATTCAAA 1.84109876033  
AATTCAAC 0.710271024479  
AATTCAAG 1.13590324364  
AATTCAAT 1.2306059772  
AATTCACA 1.82064878718  
AATTCACC 1.19773384381  
AATTCACG 0.507901553062  
AATTCACT 1.45770894332  
AATTCAGA 1.92674017817  
AATTCAGC 0.660123658788  
AATTCAGG 0.283319873799  
AATTCAGT 1.37638999289  
AATTCATA 0.934739786893  
AATTCATC 0.752933205466  
AATTCATG 1.80242029621  
AATTCCAA 2.07646060066  
AATTCCAC 1.22408999544  
AATTCCAG 1.40543785217  
AATTCCAT 1.72489164027  
AATTCCCA 2.07833130873  
AATTCCCC 3.32877588752  
AATTCCCG 4.07400539327  
AATTCCCT 3.50705381743  
AATTCCGA 1.68837192674  
AATTCCGC 2.44580560049  
AATTCCGG 1.93941666271  
AATTCCGT 3.50625320561  
AATTCCTA 1.65572588843  
AATTCCTC 0.899519662647  
AATTCCTG 1.48688697064  
AATTCGAA 0.647506507871  
AATTCGAC 0.478870422195  
AATTCGAG 1.28504000103  
AATTCGAT 3.41928240098  
AATTCGCA 4.28189472119  
AATTCGCC 1.82120187064  
AATTCGCG 2.61635865878

AATTCGCT 2.40209580208  
AATTCGGA 2.66466276147  
AATTCGGC 0.759373386557  
AATTCGGG 0.796728214281  
AATTCGGT 1.96759595096  
AATTCGTA 2.04163542401  
AATTCGTC 1.43853608064  
AATTCGTG 0.500803213118  
AATTCTAA 1.34229720745  
AATTCTAC 2.31868475337  
AATTCTAG 1.05052555982  
AATTCTAT 4.25237088602  
AATTCTCA 4.38014884647  
AATTCTCC 1.1558884803  
AATTCTCG 4.59410928466  
AATTCTCT 4.63541750899  
AATTCTGA 2.06935415789  
AATTCTGC 2.37183696186  
AATTCTGG 1.28657012888  
AATTCTGT 2.71215945641  
AATTCTTA 1.75799274394  
AATTCTTC 1.87929445264  
AATTCTTG 2.14008689239  
AATTGAAA 2.09570900262  
AATTGAAC 0.486195902745  
AATTGAAG 1.54747417857  
AATTGAAT 1.46197155435  
AATTGACA 1.26865163647  
AATTGACC -0.111517411495  
AATTGACG 1.18271930091  
AATTGACT 0.148671498155  
AATTGAGA 0.927175403567  
AATTGAGC -0.192088287804  
AATTGAGG 0.17206750324  
AATTGAGT 0.216495055512  
AATTGATA 0.900444953489  
AATTGATC 0.393091256248  
AATTGATG 2.03797895689  
AATTGCAA 0.554544575724  
AATTGCAC 1.46727132755  
AATTGCAG 0.988933339657  
AATTGCAT 2.30139070159  
AATTGCCA 0.647618901956  
AATTGCCC 1.2484690567  
AATTGCCG 1.2144724597  
AATTGCCT 0.0906000880648  
AATTGCGA 3.17273003046  
AATTGCGC 2.7082771556  
AATTGCGG 3.53429370024  
AATTGCGT 3.33634732815  
AATTGCTA 2.39858309484  
AATTGCTC 1.39228878971  
AATTGCTG 0.741039036037  
AATTGGAA -0.0857841321979



AATTGGAC 0.975318756578  
AATTGGAG 0.100329233752  
AATTGGAT 3.6478791629  
AATTGGCA -0.244621806065  
AATTGGCC -0.05610346807  
AATTGGCG 1.28560432389  
AATTGGCT 0.458916028556  
AATTGGGA 2.22958604118  
AATTGGGC -0.787748188242  
AATTGGGG 0.651203489135  
AATTGGGT 0.582080865256  
AATTGGTA 0.64712750456  
AATTGGTC 0.011516211644  
AATTGGTG 0.834708005396  
AATTGTAA 1.7035843355  
AATTGTAC 0.940895323429  
AATTGTAG 1.44679835282  
AATTGTAT 1.17279621008  
AATTGTCA -0.85993237473  
AATTGTCC 1.23471123651  
AATTGTCCG 0.511479867082  
AATTGTCT 0.219417824495  
AATTGTGA 1.22773835973  
AATTGTGC 1.12553684962  
AATTGTGG 1.73561508154  
AATTGTGT 1.79335558254  
AATTGTTA 1.79744855691  
AATTGTTC 2.18918951585  
AATTGTTG 0.415207798431  
AATTTAAA 2.41766839467  
AATTTAAC 1.90076329123  
AATTTAAG 2.69216507139  
AATTTAAT 2.80606994236  
AATTTACA 2.85711619936  
AATTTACC 2.29147911155  
AATTTACG 2.95559354452  
AATTTACT 2.17679872139  
AATTTAGA 3.03671253803  
AATTTAGC 2.14018151252  
AATTTAGG 2.19397070796  
AATTTAGT 0.750779421133  
AATTTATA 2.01855516789  
AATTTATC 0.999238570377  
AATTTATG 2.40971141619  
AATTTCAA 3.07649533938  
AATTTCAC 1.2163554527  
AATTTCAG 2.76923657092  
AATTTCAT 4.17780342216  
AATTTCCA 4.33570116781  
AATTTCCC 2.03083748898  
AATTTCCG 2.69165041103  
AATTTCCT 3.49348994238  
AATTTCGA 2.85490778627  
AATTTCGC 0.596953216565

AATTTCCG 2.58138684704  
AATTTCGT 3.25127389251  
AATTTCTA 2.46628406423  
AATTTCTC 1.97608510237  
AATTTCTG 2.17798931455  
AATTTGAA 2.16342042727  
AATTTGAC 2.27458575776  
AATTTGAG 1.46892273646  
AATTTGAT 1.7633555101  
AATTTGCA 2.10239828037  
AATTTGCC 2.08811377626  
AATTTGCG 2.24797057696  
AATTTGCT 2.10703205326  
AATTTGGA 1.15000974688  
AATTTGGC 0.832838081473  
AATTTGGG 1.35629889667  
AATTTGGT 3.02037409736  
AATTTGTA 3.28569706427  
AATTTGTC 2.23400548117  
AATTTGTG 1.24332480556  
AATTTTAA 2.56190163337  
AATTTTAC 2.46668711464  
AATTTTAG 3.21777522744  
AATTTTAT 2.22734573954  
AATTTTCA 2.47517103842  
AATTTTCC 2.64296024773  
AATTTTCG 2.24952945679  
AATTTTCT 4.34334605667  
AATTTTGA 2.05671295987  
AATTTTGC 1.78297794911  
AATTTTGG 1.97753916818  
AATTTTGT 2.32731400531  
AATTTTTA 1.85804360629  
AATTTTTC 0.956728774859  
AATTTTTG 1.04503236424  
ACAAAAAA 1.98546974712  
ACAAAAAC 1.02831910237  
ACAAAAAG 0.569250426958  
ACAAAAAT 1.910584966  
ACAAAAACA 1.42099972813  
ACAAAAACC 0.463394279404  
ACAAAAACG 0.0815949693931  
ACAAAAACT 0.0493718465016  
ACAAAAAGA 0.339421250816  
ACAAAAAGC 0.218507693785  
ACAAAAAGG -1.4043667104  
ACAAAAAGT 0.119618933997  
ACAAAAATA 3.04553782616  
ACAAAAATC 16.1522413087  
ACAAAAATG 0.319112685118  
ACAAACAA 1.27243539643  
ACAAACAC 1.699828282  
ACAAACAG 0.335571622702  
ACAAACAT 1.33519573093

ACAAACCA 0.175728936607  
ACAAACCC 0.741058639657  
ACAAACCG -0.236853545095  
ACAAACCT -0.603880874329  
ACAAACGA 2.05766020676  
ACAAACGC -0.844462243715  
ACAAACGG -0.476335543498  
ACAAACGT 0.280028556769  
ACAAACTA 0.632318407596  
ACAAACTC 0.492429853758  
ACAAACTG -0.44474600959  
ACAAAGAA 0.432068479524  
ACAAAGAC 0.342066432546  
ACAAAGAG -0.0982128269861  
ACAAAGAT 1.60239228111  
ACAAAGCA 1.30057207948  
ACAAAGCC -0.197798952866  
ACAAAGCG -0.104824213021  
ACAAAGCT 0.185194086884  
ACAAAGGA 0.966599589369  
ACAAAGGC -1.61820874274  
ACAAAGGG 0.686320367652  
ACAAAGGT -0.263144351332  
ACAAAGTA -0.106084072304  
ACAAAGTC -0.462001899654  
ACAAAGTG 1.16264205793  
ACAAATAA 2.63631279103  
ACAAATAC 2.40172307192  
ACAAATAG 0.509242179257  
ACAAATAT 6.19294860577  
ACAAATCA 3.78751077863  
ACAAATCC 5.42111097653  
ACAAATCG 3.5460454167  
ACAAATCT 4.31847089314  
ACAAATGA 0.393285985535  
ACAAATGC -0.222333013411  
ACAAATGG 1.3888552811  
ACAAATGT 1.11027059625  
ACAAATTA 2.17445386711  
ACAAATTC 1.78595247165  
ACAAATTG 0.926296638649  
ACAACAAA 1.28542501612  
ACAACAAC 0.574386575277  
ACAACAAG 0.799386465091  
ACAACAAT 1.77302349249  
ACAACACA 0.306530036571  
ACAACACC 0.651819042788  
ACAACACG 0.677300088847  
ACAACACT 0.62259265987  
ACAACAGA 0.124360134728  
ACAACAGC -0.390209262794  
ACAACAGG -0.293291058842  
ACAACAGT 0.57876889908  
ACAACATA 0.66339563358

ACAACATC 2.77296491798  
ACAACATG -0.0927303480548  
ACAACCAA 1.33861094284  
ACAACCAC 0.141043076338  
ACAACCAG -0.55110662362  
ACAACCAT -0.857319081554  
ACAACCCA -0.637317853342  
ACAACCCC 0.027820672706  
ACAACCCG -0.0792294659686  
ACAACCCCT -0.389642326116  
ACAACCGA 0.235105424995  
ACAACCGC -0.0667887476271  
ACAACCGG -0.32232062142  
ACAACCGT 0.109796997845  
ACAACCTA -0.22067820654  
ACAACCTC -0.11130987451  
ACAACCTG -0.430288993633  
ACAACGAA -0.456086834184  
ACAACGAC 0.202297330097  
ACAACGAG 0.404795924021  
ACAACGAT 2.38753266519  
ACAACGCA 0.654215650622  
ACAACGCC -0.233721670837  
ACAACGCG 0.317356984952  
ACAACGCT -0.554013971088  
ACAACGGA 0.448191018997  
ACAACGGC 0.00933550500641  
ACAACGGG -0.674900083053  
ACAACGGT -0.897144749485  
ACAACGTA 1.61936979978  
ACAACGTC -0.142029530473  
ACAACGTG -0.890276686725  
ACAACHTAA 0.38666806496  
ACAACHTAC 1.1888202087  
ACAACHTAG -0.0527624885372  
ACAACHTAT 0.845051397828  
ACAACHTCA -0.333596100616  
ACAACHTCC -1.12932897379  
ACAACHTCG -0.282808611402  
ACAACHTCT 0.556748545323  
ACAACHTGA -0.0200965852258  
ACAACHTGC 0.91601623918  
ACAACHTGG -0.39232906752  
ACAACHTGT 0.105131597776  
ACAACHTTA 1.91256989782  
ACAACHTTC -0.183852676544  
ACAACHTTG -0.480191706152  
ACAAGAAA -0.276560023019  
ACAAGAAC -0.766969658438  
ACAAGAAG -0.66020913057  
ACAAGAAT 2.95053947002  
ACAAGACA -0.528555403846  
ACAAGACC -0.231759217831  
ACAAGACG -0.278664667612

ACAAGACT -0.465658628152  
ACAAGAGA 2.6009504752  
ACAAGAGC -1.06621316032  
ACAAGAGG -0.674216831566  
ACAAGAGT -0.358472309667  
ACAAGATA 4.20409631945  
ACAAGATC 4.31643629882  
ACAAGATG 0.500373763159  
ACAAGCAA -0.0934015759878  
ACAAGCAC -0.776166369818  
ACAAGCAG 0.344480030184  
ACAAGCAT -0.211772935637  
ACAAGCCA -0.784931017424  
ACAAGCCC -0.584782766792  
ACAAGCCG -1.20671386985  
ACAAGCCT -0.362770207215  
ACAAGCGA 0.0181315184031  
ACAAGCGC -0.442882358826  
ACAAGCGG 0.136652649706  
ACAAGCGT -0.47393501494  
ACAAGCTA -0.307516490706  
ACAAGCTC -0.488636161305  
ACAAGCTG -0.622696689745  
ACAAGGAA -0.598142764199  
ACAAGGAC -0.548666103678  
ACAAGGAG -0.805529978073  
ACAAGGAT 3.44675386787  
ACAAGGCA -1.11857155291  
ACAAGGCC -1.29892432991  
ACAAGGCG -0.153754324629  
ACAAGGCT -0.877961431548  
ACAAGGGA -0.654746255258  
ACAAGGGC -1.06559943633  
ACAAGGGG 0.0236341237171  
ACAAGGGT -0.366326826562  
ACAAGGTA 0.309839650313  
ACAAGGTC 0.202389597799  
ACAAGGTG -0.685641298271  
ACAAGTAA -0.0797344552079  
ACAAGTAC -0.810811454558  
ACAAGTAG -0.0310270407179  
ACAAGTAT 0.491350870539  
ACAAGTCA -0.00956081594032  
ACAAGTCC -0.858424725696  
ACAAGTCG -0.387083400313  
ACAAGTCT -0.121313993633  
ACAAGTGA 0.542794950317  
ACAAGTGC 0.0678787088735  
ACAAGTGG -0.702410495807  
ACAAGTGT -0.448793242189  
ACAAGTTA 1.06528159632  
ACAAGTTC 0.0722887391252  
ACAAGTTG -0.222066926949  
ACAATAAA 1.2007431301

ACAATAAC 0.170405377685  
ACAATAAG 0.0328002534507  
ACAATAAT 1.99086231078  
ACAATACA 1.3056585653  
ACAATACC 0.56171375008  
ACAATACG 1.38721197502  
ACAATACT 1.89723568524  
ACAATAGA 1.223502671  
ACAATAGC 0.421904394865  
ACAATAGG 1.13725406371  
ACAATAGT 1.68656368888  
ACAATATA 2.9186475176  
ACAATATC 7.91896732347  
ACAATATG 1.9867594039  
ACAATCAA 2.98829630263  
ACAATCAC 2.99090619785  
ACAATCAG 1.79409137172  
ACAATCAT 2.31854752803  
ACAATCCA 5.65761557719  
ACAATCCC 3.41810304722  
ACAATCCG 4.90677081066  
ACAATCCT 3.48264469729  
ACAATCGA 1.18317933252  
ACAATCGC 2.76513235713  
ACAATCGG 2.29001380634  
ACAATCGT 1.26770255991  
ACAATCTA 6.28711838226  
ACAATCTC 4.59216199179  
ACAATCTG 8.41358860052  
ACAATGAA 0.723256462062  
ACAATGAC -0.965799761692  
ACAATGAG 0.0012609048088  
ACAATGAT 1.92926512437  
ACAATGCA 0.465553029988  
ACAATGCC -0.298588218223  
ACAATGCG -0.915155770973  
ACAATGCT -0.306888129355  
ACAATGGA -0.563347385042  
ACAATGGC 0.160653491799  
ACAATGGG -0.475578059639  
ACAATGGT -0.397995559093  
ACAATGTA 1.06073800007  
ACAATGTC -1.09809282779  
ACAATGTG -0.353821285586  
ACAATTAA 0.134541470572  
ACAATTAC 2.06318999576  
ACAATTAG 2.80097927444  
ACAATTAT 1.26019358948  
ACAATTCA -0.292907873425  
ACAATTCC 1.06903974087  
ACAATTCT 1.926049608  
ACAATTCT 1.29598796909  
ACAATTGA 0.130782019108  
ACAATTGC -0.0659081530374

ACAATTGG -0.294559020954  
ACAATTGT 0.154263234592  
ACAATTTA 1.56012504771  
ACAATTTT 2.15931203138  
ACAATTTG 1.11394718975  
ACACAAAA 1.45876231114  
ACACAAAC 0.344551125978  
ACACAAAG 1.30057207948  
ACACAAAT 2.1118456567  
ACACAACA 1.03514482131  
ACACAACC 0.0378407361067  
ACACAACG -0.470302856311  
ACACAACT 0.724370731797  
ACACAAGA 0.497713421297  
ACACAAGC -1.50003132823  
ACACAAGG -0.843908114736  
ACACAAGT 0.00669450538202  
ACACAATA 2.94103694217  
ACACAATC 5.22084954766  
ACACAATG 0.462008434193  
ACACACAA 0.242026809601  
ACACACAC 0.0357052484849  
ACACACAG 0.252291787555  
ACACACAT -0.206179108147  
ACACACCA 0.240900254931  
ACACACCC -0.31878987885  
ACACACCG 2.07349470372  
ACACACCT -0.165061953761  
ACACACGA 0.519042159356  
ACACACGC -0.968146968405  
ACACACGG -0.808404130079  
ACACACGT -0.0280556547589  
ACACACTA 2.28021774696  
ACACACTC -0.459724220445  
ACACACTG 0.252285514397  
ACACAGAA 1.44844165891  
ACACAGAC 0.0014438719245  
ACACAGAG -0.15959907845  
ACACAGAT 4.25454270568  
ACACAGCA 0.340611582595  
ACACAGCC -0.224078781077  
ACACAGCG -0.0651728866138  
ACACAGCT 0.0818568737501  
ACACAGGA 0.249015107894  
ACACAGGC -0.153905141809  
ACACAGGG -0.449480675781  
ACACAGGT -0.212380386462  
ACACAGTA 0.274097285641  
ACACAGTC 0.104167361076  
ACACAGTG 0.415871969061  
ACACATAA 0.0291118977797  
ACACATAC 1.00601384267  
ACACATAG -0.0210613446887  
ACACATAT 2.03481937618

ACACATCA 0.44272239329  
ACACATCC 0.0182297978824  
ACACATCG 0.67421081979  
ACACATCT 0.0698704366187  
ACACATGA -0.136254565539  
ACACATGC -0.104903934407  
ACACATGG -0.110533571176  
ACACATGT -0.578583840912  
ACACATTA 1.225539095  
ACACATTC 0.824219284797  
ACACATTG -0.0693468892862  
ACACAAA 1.59131989541  
ACACCAAC 0.00548692241837  
ACACCAAG -0.345649974198  
ACACCAAT 1.42619886941  
ACACCACA -0.377912304329  
ACACCACC -0.292246316611  
ACACCACG 0.742160101693  
ACACCACT -0.287550596277  
ACACCAGA 1.99055649431  
ACACCAGC -0.0479980248443  
ACACCAGG -0.829960792888  
ACACCAGT -0.842605911636  
ACACCATA 0.477193397889  
ACACCATC -0.757019122541  
ACACCATG 0.592744450141  
ACACCCAA -0.220167989669  
ACACCCAC -0.519406525298  
ACACCCAG -1.2160857069  
ACACCCAT -0.373017149839  
ACACCCCA 0.519178077785  
ACACCCCC -1.19717893069  
ACACCCCG -1.12089366699  
ACACCCCT -0.75568241707  
ACACCCGA -0.49818129435  
ACACCCGC -0.255925775854  
ACACCCGG -0.917827875007  
ACACCCGT -0.607722660995  
ACACCCTA 0.43562640578  
ACACCCTC -1.12934622497  
ACACCCTG -0.8523510016  
ACACCGAA 0.908207202682  
ACACCGAC -0.216626269072  
ACACCGAG -0.0654708616308  
ACACCGAT 0.882977605716  
ACACCGCA -0.143343234364  
ACACCGCC -0.69740268585  
ACACCGCG -0.269717575655  
ACACCGCT 0.358332209132  
ACACCGGA -0.0376151637912  
ACACCGGC -1.46146029195  
ACACCGGG -1.56236116725  
ACACCGGT -0.582892455105  
ACACCGTA -0.338173415087



ACACCGTC 0.224846720199  
ACACCGTG -0.416553129494  
ACACCTAA 1.35933275283  
ACACCTAC -0.835380017474  
ACACCTAG 0.448147629652  
ACACCTAT 1.56036395049  
ACACCTCA -0.421064053041  
ACACCTCC -0.157149410152  
ACACCTCG 0.788919700546  
ACACCTCT -0.806772324788  
ACACCTGA 0.703627488508  
ACACCTGC -1.00082698632  
ACACCTGG -0.856455476768  
ACACCTGT -0.340769457078  
ACACCTTA 0.253312221297  
ACACCTTC -0.15691782606  
ACACCTTG -0.314921692642  
ACACGAAA 2.79487549146  
ACACGAAC 0.321826610207  
ACACGAAG -0.52388059404  
ACACGAAT 3.02520861132  
ACACGACA 0.576906293842  
ACACGACC -0.851976964539  
ACACGACG -0.45824924411  
ACACGACT 0.0953391977432  
ACACGAGA 0.0652479031313  
ACACGAGC 0.297253081042  
ACACGAGG -0.282426471511  
ACACGAGT 0.284543662422  
ACACGATA 1.56982700971  
ACACGATC 3.29349250893  
ACACGATG 0.0592400471963  
ACACGCAA 0.440071983928  
ACACGCAC -0.178255451093  
ACACGCAG -0.127024658696  
ACACGCAT 0.328742767181  
ACACGCCA -0.0698296610901  
ACACGCCC -1.21756878606  
ACACGCCG -0.679936122222  
ACACGCCT -0.249717701619  
ACACGCGA 0.196163226852  
ACACGCGC -0.320358168413  
ACACGCGG -0.785082618748  
ACACGCGT 0.802349225457  
ACACGCTA 0.608978860936  
ACACGCTC -0.348724605887  
ACACGCTG -0.667633936125  
ACACGGAA 0.0172611176955  
ACACGGAC -0.441038050299  
ACACGGAG -0.97209017113  
ACACGGAT 3.15898162  
ACACGGCA -0.709930967025  
ACACGGCC -1.0913345453  
ACACGGCG -0.997823711809

ACACGGCT -0.996974221629  
ACACGGGA 0.0623295776358  
ACACGGGC -1.28478071049  
ACACGGGG -0.521290563826  
ACACGGGT -0.32727171157  
ACACGGTA 0.284529547816  
ACACGGTC -0.671555182796  
ACACGGTG -0.808404130079  
ACACGTAA 1.72807579085  
ACACGTAC -0.277511974784  
ACACGTAG 0.233943845192  
ACACGTAT 0.882910430646  
ACACGTCA -0.593576427754  
ACACGTCC -0.877275043483  
ACACGTCCG 0.0511599579852  
ACACGTCT -0.334917384573  
ACACGTGA -0.484677537066  
ACACGTGC -0.802185600579  
ACACGTGG -0.384916024136  
ACACGTGT 0.93459654978  
ACACGTTA 0.481864286971  
ACACGTTC -1.19200566618  
ACACGTTG -0.60823993517  
ACACTAAA 1.79118167182  
ACACTAAC 0.837238701987  
ACACTAAG -0.360794423747  
ACACTAAT 1.72935446961  
ACACTACA 0.84097985674  
ACACTACC 0.151884400707  
ACACTACG -0.0514035656307  
ACACTACT -0.534395191416  
ACACTAGA 1.5377377142  
ACACTAGC -0.625337427987  
ACACTAGG 0.0618522948454  
ACACTAGT -0.283431222358  
ACACTATA 1.31010414345  
ACACTATC 1.63386184087  
ACACTATG -0.0535680666095  
ACACTCAA 0.809739790024  
ACACTCAC 0.00254559534263  
ACACTCAG 0.109336443476  
ACACTCAT -0.589122746776  
ACACTCCA -0.602841882493  
ACACTCCC -1.04772746985  
ACACTCCG 0.0298610174277  
ACACTCCT 0.246127364045  
ACACTCGA 0.183873587072  
ACACTCGC 0.071341492229  
ACACTCGG -0.234134392374  
ACACTCGT 0.326918062274  
ACACTCTA 0.170625199605  
ACACTCTC 0.81701560807  
ACACTCTG 0.354941567097  
ACACTGAA 0.642242282571

ACACTGAC -0.252554214675  
ACACTGAG -0.411593936514  
ACACTGAT 1.83011498299  
ACACTGCA 0.221566381196  
ACACTGCC -0.877995411155  
ACACTGCG -0.700542140174  
ACACTGCT -0.100468550141  
ACACTGGA 0.134745870979  
ACACTGGC -0.815024403088  
ACACTGGG -0.61847642253  
ACACTGGT -0.790189753711  
ACACTGTA 1.41472787678  
ACACTGTC -0.314105659306  
ACACTGTG 0.164257159834  
ACACTTAA 1.31685981212  
ACACTTAC 0.00882136741129  
ACACTTAG 0.140482674201  
ACACTTAT 0.751978639885  
ACACTTCA -0.0667955435485  
ACACTTCC 0.904952740457  
ACACTTCG -0.450473403075  
ACACTTCT 1.07367089995  
ACACTTGA 0.703233063683  
ACACTTGC -0.182869358988  
ACACTTGG 0.316237226204  
ACACTTTA 1.5327787826  
ACACTTTC 0.00860729588591  
ACACTTTG 0.41003374978  
ACAGAAAA 1.39870570784  
ACAGAAAC 1.15465266813  
ACAGAAAG -0.0425147617682  
ACAGAAAT 2.94435596565  
ACAGAACA 0.0367520817683  
ACAGAACC 0.186944298036  
ACAGAACG -0.163972253897  
ACAGAACT 0.949650038534  
ACAGAAGA 0.265177115988  
ACAGAAGC 0.05259076083  
ACAGAAGG -0.783706183275  
ACAGAAGT -0.13993481838  
ACAGAATA 2.49838067843  
ACAGAATC 11.9571785985  
ACAGAATG -0.115540596988  
ACAGACAA 0.574093566511  
ACAGACAC 0.0698440370777  
ACAGACAG -0.220103428415  
ACAGACAT 0.275986029039  
ACAGACCA 0.301847646699  
ACAGACCC -1.46593331517  
ACAGACCG -0.0359169675759  
ACAGACCT -0.91657533441  
ACAGACGA 1.64194951015  
ACAGACGC -0.0847702329953  
ACAGACGG -0.238030023649

ACAGACGT -0.139424078746  
ACAGACTA 0.758567547103  
ACAGACTC -0.557157868899  
ACAGACTG -0.521908469914  
ACAGAGAA 0.872994135738  
ACAGAGAC -0.115077951567  
ACAGAGAG -0.501722492183  
ACAGAGAT 3.26012740985  
ACAGAGCA -0.0419496547623  
ACAGAGCC -0.867442913448  
ACAGAGCG 0.00400907088667  
ACAGAGCT -0.804075650885  
ACAGAGGA 0.19663841859  
ACAGAGGC -0.297076387084  
ACAGAGGG -0.843014189685  
ACAGAGGT -0.829960792888  
ACAGAGTA 2.22785804746  
ACAGAGTC -0.700391322994  
ACAGAGTG -0.061580980751  
ACAGATAA 1.0171340612  
ACAGATAC 2.89202763194  
ACAGATAG 0.670652370771  
ACAGATAT 8.15879486834  
ACAGATCA 0.885201701698  
ACAGATCC 3.75546199727  
ACAGATCG 1.45825261703  
ACAGATCT 4.97034378054  
ACAGATGA 0.876985694058  
ACAGATGC 0.33756387321  
ACAGATGG -0.308655068929  
ACAGATGT 0.905888486563  
ACAGATTA 5.34796333748  
ACAGATTC 10.8732479482  
ACAGATTG 2.33952758304  
ACAGCAAA 0.736421207419  
ACAGCAAC 0.262837227959  
ACAGCAAG -0.438298509814  
ACAGCAAT 1.53221367559  
ACAGCACA -0.281257573024  
ACAGCACC 0.52728665759  
ACAGCACG -0.195405742993  
ACAGCACT -0.67305969525  
ACAGCAGA 0.150010033297  
ACAGCAGC -0.760091924559  
ACAGCAGG -0.0576142536825  
ACAGCAGT -0.563889751849  
ACAGCATA -0.0387127051039  
ACAGCATC 0.884434808102  
ACAGCATG 0.223843537642  
ACAGCCAA -0.515823245028  
ACAGCCAC -1.05061965719  
ACAGCCAG -0.248974332366  
ACAGCCAT 0.359198427734  
ACAGCCCA -1.20507892798

ACAGCCCC -1.16417479959  
ACAGCCCG -0.568980419771  
ACAGCCCT -0.876853696353  
ACAGCCGA -0.642190790397  
ACAGCCGC -1.2656975017  
ACAGCCGG -1.03934574628  
ACAGCCGT -1.20152283139  
ACAGCCTA 0.349431643098  
ACAGCCTC -1.15016082544  
ACAGCCTG -0.203758191825  
ACAGCGAA 0.209738341311  
ACAGCGAC 0.0986485501031  
ACAGCGAG -0.586804292039  
ACAGCGAT 0.404540292822  
ACAGCGCA 0.0209377111948  
ACAGCGCC -0.664775989777  
ACAGCGCG -0.70897901526  
ACAGCGCT -0.653299508136  
ACAGCGGA 1.77962651432  
ACAGCGGC -0.566993135513  
ACAGCGGG -0.6498662609  
ACAGCGGT -0.244257440123  
ACAGCGTA 0.126118710092  
ACAGCGTC -1.12611920781  
ACAGCGTG -0.782453642677  
ACAGCTAA -0.0286327853181  
ACAGCTAC -0.956029317714  
ACAGCTAG -0.875029252828  
ACAGCTAT 0.915236015123  
ACAGCTCA -0.86579673217  
ACAGCTCC -0.429281106207  
ACAGCTCG -0.280646201476  
ACAGCTCT -0.0714423855242  
ACAGCTGA 1.92975260104  
ACAGCTGC -0.823082797627  
ACAGCTGG -0.416270837373  
ACAGCTGT -0.19741576745  
ACAGCTTA -0.308333308187  
ACAGCTTC -0.633983408349  
ACAGCTTG -0.519363135953  
ACAGGAAA 0.2882659977  
ACAGGAAC 0.750779421133  
ACAGGAAG 0.118282228526  
ACAGGAAT 0.637435997823  
ACAGGACA -0.56798141932  
ACAGGACC -0.862525802904  
ACAGGACG -0.249632752601  
ACAGGACT -0.0810298623871  
ACAGGAGA 0.326772472726  
ACAGGAGC -0.637342684594  
ACAGGAGG -0.913818804121  
ACAGGAGT -0.194315258983  
ACAGGATA 2.52697843861  
ACAGGATC 3.7140761426

ACAGGATG -0.351750097836  
ACAGGCAA -0.374967579292  
ACAGGCAC -1.29068035444  
ACAGGCAG -1.13449465823  
ACAGGCAT 0.819808209019  
ACAGGCCA -1.29793107986  
ACAGGCCC -0.957519715562  
ACAGGCCG -1.03470099536  
ACAGGCCT -0.669714010849  
ACAGGCCGA -0.00933811882235  
ACAGGCCG -0.970203518786  
ACAGGCCG -0.415573732662  
ACAGGCCG -0.559211544082  
ACAGGCTA -0.333512981269  
ACAGGCTC -1.34667979264  
ACAGGCTG -0.421778408937  
ACAGGGAA 1.62143889647  
ACAGGGAC -0.822771230767  
ACAGGGAG 0.0215545717563  
ACAGGGAT 0.623548793741  
ACAGGGCA -0.349539855078  
ACAGGGCC -1.48145964322  
ACAGGGCG -0.936120665854  
ACAGGGCT -1.02454161557  
ACAGGGGA -0.47233771202  
ACAGGGGC -0.411368102817  
ACAGGGGG -1.35105113841  
ACAGGGGT 0.0800807858198  
ACAGGGTA 1.2768493474  
ACAGGGTC -0.700296180094  
ACAGGGTG -1.17920946887  
ACAGGTAA -0.431603220287  
ACAGGTAC 0.328608939805  
ACAGGTAG -1.52811939431  
ACAGGTAT 2.76241294303  
ACAGGTCA 0.438434166861  
ACAGGTCC -0.613444042703  
ACAGGTCC -1.4666215329  
ACAGGTCT 0.145424615996  
ACAGGTGA 0.227269466193  
ACAGGTGC 0.16228869505  
ACAGGTGG -0.732388612188  
ACAGGTTA -0.510486617026  
ACAGGTTC -0.639878347436  
ACAGGTTG -0.196782178466  
ACAGTAAA 0.40390043068  
ACAGTAAC -0.269905247639  
ACAGTAAG 0.504862207889  
ACAGTAAT 2.21396613851  
ACAGTACA 0.380296104465  
ACAGTACC -0.102073694509  
ACAGTACG -0.0598088135446  
ACAGTACT -0.084168009803  
ACAGTAGA 0.153436745993

ACAGTAGC -0.730530711819  
ACAGTAGG 0.123062636496  
ACAGTAGT -0.0764332056774  
ACAGTATA 0.953595855075  
ACAGTATC 4.49742161928  
ACAGTATG -0.178272440897  
ACAGTCAA -0.202280340293  
ACAGTCAC -0.592931599362  
ACAGTCAG -0.264970624528  
ACAGTCAT 0.211572717337  
ACAGTCCA -0.0930847814961  
ACAGTCCC -0.622696689745  
ACAGTCCG -1.19366726897  
ACAGTCCT -1.01210717039  
ACAGTCGA 0.12959665358  
ACAGTCGC -0.884948684315  
ACAGTCGG -0.186381543465  
ACAGTCGT -0.652481122365  
ACAGTCTA 0.155481011438  
ACAGTCTC -1.05252852697  
ACAGTCTG -0.863080454646  
ACAGTGAA 0.0011286457223  
ACAGTGAC -0.579989551123  
ACAGTGAG 0.137708369964  
ACAGTGAT 0.264093950663  
ACAGTGCA -0.742736186726  
ACAGTGCC -0.467469479834  
ACAGTGCG -0.0655443098587  
ACAGTGCT -1.02163871159  
ACAGTGGA 0.653973088503  
ACAGTGGC -0.782531534392  
ACAGTGGG -0.539108424317  
ACAGTGGT -0.457986555609  
ACAGTGTA 2.3102348092  
ACAGTGTC 0.328066311616  
ACAGTGTG -0.809289690919  
ACAGTTAA 1.16511237537  
ACAGTTAC 0.256007849675  
ACAGTTAG 1.1748253154  
ACAGTTAT 1.56609996957  
ACAGTTCA 0.430398773903  
ACAGTTCC 0.902682379933  
ACAGTTCG -0.310793170367  
ACAGTTCT -0.320758082251  
ACAGTTGA 0.642605602986  
ACAGTTGC -0.425027382149  
ACAGTTGG -1.04337050007  
ACAGTTTA -0.278765560908  
ACAGTTTC 0.635634555878  
ACAGTTTG -0.239941768626  
ACATAAAA 2.20416824946  
ACATAAAC 0.732940650115  
ACATAAAG -0.523354432891  
ACATAAAT 0.844507724113

ACATAACA 1.36626616099  
ACATAACC 0.317277263566  
ACATAACG 0.0647899625788  
ACATAACT 0.575554428239  
ACATAAGA 1.23868554365  
ACATAAGC 0.246969535541  
ACATAAGG -0.0473236603321  
ACATAAGT -0.251530644354  
ACATAATA 2.47335940259  
ACATAATC 4.2367729394  
ACATAATG 0.202913145132  
ACATACAA 4.06742537303  
ACATACAC 0.358122581094  
ACATACAG 0.941785850519  
ACATACAT 0.714155154964  
ACATACCA -0.346029500272  
ACATACCC 0.529546040087  
ACATACCG -0.0863955037459  
ACATACCT 0.355520527327  
ACATACGA 0.133682047892  
ACATACGC -0.285623429786  
ACATACGG 0.967767703712  
ACATACGT 0.534417931615  
ACATACTA 0.45997932888  
ACATACTC -0.38140070308  
ACATACTG -0.4990553544  
ACATAGAA 0.896751108805  
ACATAGAC -0.206681483571  
ACATAGAG -0.118875826126  
ACATAGAT 2.49764619615  
ACATAGCA -1.35999457103  
ACATAGCC -0.958929869261  
ACATAGCG 0.528324342517  
ACATAGCT 0.133814306978  
ACATAGGA 1.27703309866  
ACATAGGC -0.599559975201  
ACATAGGG 0.233787016236  
ACATAGGT -0.543090311518  
ACATAGTA 0.728005242859  
ACATAGTC 0.567470941067  
ACATAGTG -0.330141942853  
ACATATAA 1.14811420756  
ACATATAC 0.902862733232  
ACATATAG -0.307493750508  
ACATATAT 2.86795830787  
ACATATCA 2.90478174681  
ACATATCC 3.11491895644  
ACATATCG 2.57442520967  
ACATATCT 5.97225105699  
ACATATGA 1.49306106527  
ACATATGC 0.57795547956  
ACATATGG 0.0474606242873  
ACATATGT 1.4457094371  
ACATATTA 2.81217058877



ACATATTC 1.30153971414  
ACATATTG 1.61448248674  
ACATCAAA -0.516898830286  
ACATCAAC 1.96800945665  
ACATCAAG 1.02205430832  
ACATCAAT 1.87631313418  
ACATCACA -0.399213074557  
ACATCACC -0.0830161011189  
ACATCACG 0.481763393676  
ACATCACT 0.0472243353264  
ACATCAGA 1.80326011527  
ACATCAGC 0.727234167157  
ACATCAGG 0.418264917552  
ACATCAGT 0.0182297978824  
ACATCATA 0.196163226852  
ACATCATC 1.08125567104  
ACATCATG -0.298231693729  
ACATCCAA 0.926461309053  
ACATCCAC 1.46505481163  
ACATCCAG 1.87866818234  
ACATCCAT 0.469293923359  
ACATCCCA 0.881411145824  
ACATCCCC -0.337421943005  
ACATCCCG 1.11895264727  
ACATCCCT 0.0288643694103  
ACATCCGA 0.744709879142  
ACATCCGC -0.143030621978  
ACATCCGG 0.79677395606  
ACATCCGT 1.33602457196  
ACATCCTA 0.7081491287  
ACATCCTC 0.359266909712  
ACATCCTG 0.703385971915  
ACATCGAA 0.706383757415  
ACATCGAC -0.708457036218  
ACATCGAG 1.36620761152  
ACATCGAT 1.47668446289  
ACATCGCA 0.401132922364  
ACATCGCC -0.389957290937  
ACATCGCG 0.555129024968  
ACATCGCT 0.437077596389  
ACATCGGA 0.7742282253  
ACATCGGC -0.782021317521  
ACATCGGG 0.879090600034  
ACATCGGT 0.8097031966  
ACATCGTA 0.384457822202  
ACATCGTC -0.229768535612  
ACATCGTG 0.167689361543  
ACATCTAA 1.90696744474  
ACATCTAC 0.487260771358  
ACATCTAG 1.58281114039  
ACATCTAT 0.253018428386  
ACATCTCA 0.378200085464  
ACATCTCC 0.168188077624  
ACATCTCG 0.14752429434

ACATCTCT 1.01687686171  
ACATCTGA 1.93012167185  
ACATCTGC 1.53308329216  
ACATCTGG 1.60490076027  
ACATCTTA 1.94990642884  
ACATCTTC 0.774454843142  
ACATCTTG -0.0623039622396  
ACATGAAA 0.458945564677  
ACATGAAC 0.739816292941  
ACATGAAG -0.57331281969  
ACATGAAT 1.03791285239  
ACATGACA 0.732732328984  
ACATGACC -0.548165819307  
ACATGACG -0.031687290624  
ACATGACT -0.37312222524  
ACATGAGA 1.48302401206  
ACATGAGC -0.340443252848  
ACATGAGG -0.216626269072  
ACATGAGT 0.334832696936  
ACATGATA 2.43218944912  
ACATGATC 2.35396708643  
ACATGATG -0.0265694390162  
ACATGCAA 1.51565933373  
ACATGCAC 0.292796786248  
ACATGCAG 0.0186584636963  
ACATGCAT 1.03912095811  
ACATGCCA 0.0233737876496  
ACATGCCC -0.741583493897  
ACATGCCG -0.805374717406  
ACATGCCT -0.497289983115  
ACATGCGA 0.44252714124  
ACATGCGC -0.00640071247052  
ACATGCGG -0.215826441395  
ACATGCGT -1.64007409721  
ACATGCTA 0.85570792541  
ACATGCTC -0.757770071861  
ACATGCTG 0.223843537642  
ACATGGAA 0.155208390436  
ACATGGAC -0.316731498798  
ACATGGAG -0.154341126307  
ACATGGAT 3.30422745099  
ACATGGCA -0.340113127895  
ACATGGCC -1.49816244983  
ACATGGCG 1.22711365772  
ACATGGCT 0.153250119535  
ACATGGGA 0.700465032604  
ACATGGGC 0.0344788460465  
ACATGGGG 0.0400567292595  
ACATGGGT -0.342853713907  
ACATGGTA -0.0396782487116  
ACATGGTC -1.41548901999  
ACATGGTG -0.278777061698  
ACATGTAA 1.53610381785  
ACATGTAC 0.311925475432

ACATGTAG 0.218832852488  
ACATGTAT 0.086437324801  
ACATGTCA -0.273229760131  
ACATGTCC -0.0337007130415  
ACATGTCCG -0.385753229381  
ACATGTCT -0.701630794512  
ACATGTGA 1.34349459653  
ACATGTGC -0.217577175311  
ACATGTGG -1.38792999025  
ACATGTGA 1.42606138269  
ACATGTTC 0.28799703604  
ACATGTTG 0.737971723033  
ACATTTAA 0.665600910088  
ACATTTAA 0.635455248104  
ACATTTAA 0.732521132657  
ACATTTAA 0.259745083704  
ACATTTAA 0.804280835436  
ACATTTAA 0.929344348033  
ACATTTAA 0.915912470688  
ACATTTAA 2.15143294461  
ACATTTAA 0.844873658344  
ACATTTAA 0.364998223921  
ACATTTAA 0.629840248705  
ACATTTAA 0.0342862078118  
ACATTTAA 0.353722483343  
ACATTTAA 2.55611699731  
ACATTTAA 1.04884696722  
ACATTTAA 1.28221368185  
ACATTTAA 0.496973711386  
ACATTTAA 0.529350788036  
ACATTTAA 1.66651728892  
ACATTTAA -0.311087486042  
ACATTTAA 0.579531349189  
ACATTTAA 1.59362319002  
ACATTTAA 0.943977012421  
ACATTTAA 0.36194136618  
ACATTTAA -0.444599374516  
ACATTTAA -0.18084103782  
ACATTTAA -0.0052898406966  
ACATTTAA 1.54144750316  
ACATTTAA 1.41879183781  
ACATTTAA 0.371012353014  
ACATTTAA 1.28544174454  
ACATTTAA 0.403506005855  
ACATTTAA 0.86129025211  
ACATTTAA 0.804613574205  
ACATTTAA 0.629689170144  
ACATTTAA -0.0106374467254  
ACATTTAA 0.740520193574  
ACATTTAA 0.393037934402  
ACATTTAA 1.8878494722  
ACATTTAA -0.0289767634957  
ACATTTAA -0.542234809561  
ACATTTAA 0.537422774418

ACATTGTA -0.60565539397  
ACATTGTC 0.686585669969  
ACATTGTG 0.25042317054  
ACATTTAA 0.804907367116  
ACATTTAC 0.843448605894  
ACATTTAG 0.338309333516  
ACATTTAT 1.1852813633  
ACATTTCA 0.348164726513  
ACATTTCC 1.13270027358  
ACATTTTC 1.43181700539  
ACATTTCT -0.604872033333  
ACATTTGA 0.291914100605  
ACATTTGC 0.592660023886  
ACATTTGG -0.230321619064  
ACATTTTA 1.89810869976  
ACATTTTC 1.00383548847  
ACATTTTG 0.315179676275  
ACCAAAAA 2.37684634011  
ACCAAAAC 0.685114091596  
ACCAAAAG 0.0760523726952  
ACCAAAAT 2.69616917603  
ACCAAACA 0.0869250628551  
ACCAAACCC -0.284370105043  
ACCAAACG 0.0935009009935  
ACCAAACT 0.512656084255  
ACCAAAGA 2.20001280489  
ACCAAAGC -0.39306537947  
ACCAAAGG -0.985016536473  
ACCAAAGT 0.681007263993  
ACCAAATA 0.681057972022  
ACCAAATC 6.3010672724  
ACCAAATG -0.029985696448  
ACCAACAA -0.0795961843448  
ACCAACAC -0.0986976898427  
ACCAACAG 0.826192715831  
ACCAACAT 0.812977785208  
ACCAACCA -0.412445256365  
ACCAACCC -0.745582632283  
ACCAACCG -0.472624447628  
ACCAACCT -0.036876499407  
ACCAACGA -0.23240195517  
ACCAACGC -0.275334666107  
ACCAACGG -0.796526427691  
ACCAACGT 0.927175403567  
ACCAACTA -0.375585223999  
ACCAACTC -0.603584990365  
ACCAACTG -0.632989112766  
ACCAAGAA 0.438529832525  
ACCAAGAC -0.976202749128  
ACCAAGAG 0.0536754944446  
ACCAAGAT 2.08393480734  
ACCAAGCA 1.25831817654  
ACCAAGCC -1.4887464393  
ACCAAGCG -0.345850192499

ACCAAGCT -0.124849441072  
ACCAAGGA 0.121650130363  
ACCAAGGC -1.31920832574  
ACCAAGGG -0.903502333992  
ACCAAGGT -0.902819866651  
ACCAAGTA 0.0403128832215  
ACCAAGTC -0.725884392607  
ACCAAGTG -0.807925801762  
ACCAATAA -0.135791135973  
ACCAATAC -0.222984637725  
ACCAATAG -0.0104782653348  
ACCAATAT 2.02994853018  
ACCAATCA -0.0540359396625  
ACCAATCC 1.50686645691  
ACCAATCG 0.947738293556  
ACCAATCT 2.95704813309  
ACCAATGA 0.764391651778  
ACCAATGC 0.126649314727  
ACCAATGG -0.518787573684  
ACCAATTA 0.368671419459  
ACCAATTC 0.913061320262  
ACCAATTG -0.662069644755  
ACCACAAA 0.940895323429  
ACCACAAC 0.855100474586  
ACCACAAG 0.427653221641  
ACCACAAT 0.912796802089  
ACCACACA 0.376637807677  
ACCACACC 0.499908503922  
ACCACACG -0.846569502125  
ACCACACT -0.597287262242  
ACCACAGA -0.642313116982  
ACCACAGC -0.790308420954  
ACCACAGG 0.420515413076  
ACCACAGT -0.20043001999  
ACCACATA 0.453638734176  
ACCACATC 0.234158962244  
ACCACATG -0.2241153745  
ACCACCAA 0.426721134877  
ACCACCAC -1.42639046212  
ACCACCAG -0.526487875439  
ACCACCAT -1.0035652199  
ACCACCCA -0.407076217046  
ACCACCCC 0.168988428064  
ACCACCCG -1.23844167462  
ACCACCCCT -0.861637366867  
ACCACCGA -0.247125318971  
ACCACCGC -0.206273466903  
ACCACCGG -0.329838478822  
ACCACCGT -0.456398923808  
ACCACCTA -0.148021703513  
ACCACCTC -0.420461568467  
ACCACCTG -0.084168009803  
ACCACGAA -0.381783888497  
ACCACGAC -0.470042520244

ACCACGAG -0.251462423758  
ACCACGAT -0.299289243658  
ACCACGCA -0.415676978392  
ACCACGCC -1.09947684333  
ACCACGCG -0.562003622268  
ACCACGCT -0.501722492183  
ACCACGGA 1.6053320399  
ACCACGGC -0.934066990671  
ACCACGGG -0.669028929691  
ACCACGGT 0.641498651936  
ACCACGTA -0.228095954793  
ACCACGTC -0.398369857536  
ACCACGTG 0.0404817357311  
ACCACTAA 0.556290082008  
ACCACTAC -0.053537484963  
ACCACTAG -0.512812390448  
ACCACTAT -0.125304506427  
ACCACTCA 0.886102422671  
ACCACTCC -0.863222646233  
ACCACTCG -0.305301020317  
ACCACTCT -0.156698788284  
ACCACTGA 1.00873743888  
ACCACTGC -1.07863584333  
ACCACTGG -0.641008300066  
ACCACTTA 0.495631778283  
ACCACTTC -0.573411621932  
ACCACTTG -0.550892552095  
ACCAGAAA 1.84282074227  
ACCAGAAC -0.171081310486  
ACCAGAAG -0.21321314822  
ACCAGAAT 0.0455878251673  
ACCAGACA -1.01765630163  
ACCAGACC -0.55644952478  
ACCAGACG -0.374897529025  
ACCAGACT -0.478731105806  
ACCAGAGA 0.838895338529  
ACCAGAGC -1.22377476924  
ACCAGAGG -1.32271998745  
ACCAGAGT -0.149275551018  
ACCAGATA 2.89354861144  
ACCAGATC 1.22284921702  
ACCAGATG 0.924912361727  
ACCAGCAA -0.294639787866  
ACCAGCAC 0.742160101693  
ACCAGCAG -0.825656622182  
ACCAGCAT 0.625371407595  
ACCAGCCA -0.716537909573  
ACCAGCCC -0.882983094729  
ACCAGCCG 0.217902856777  
ACCAGCCT -1.00425866527  
ACCAGCGA 0.284706241773  
ACCAGCGC -0.599739544356  
ACCAGCGG -0.253224919845  
ACCAGCGT -0.896294736542

ACCAGCTA 0.448796901532  
ACCAGCTC -1.34482450608  
ACCAGCTG -1.22806273429  
ACCAGGAA -0.20977754855  
ACCAGGAC -0.829960792888  
ACCAGGAG -0.391253743643  
ACCAGGAT 3.0834987978  
ACCAGGCA -1.69752368049  
ACCAGGCC -0.667329949331  
ACCAGGCG 1.02945558954  
ACCAGGCT -1.35760554326  
ACCAGGGA -0.147433594926  
ACCAGGGC -1.67507544506  
ACCAGGGG -1.25409869347  
ACCAGGGT -0.829672750372  
ACCAGGTA -0.245301920972  
ACCAGGTC -1.27354365439  
ACCAGGTG -1.00360599543  
ACCAGTAA 0.0692703044792  
ACCAGTAC -0.00894081879968  
ACCAGTAG -0.987661718203  
ACCAGTAT 1.39683447701  
ACCAGTCA -1.16816217581  
ACCAGTCC -0.495952232117  
ACCAGTCG -1.15824614228  
ACCAGTCT -0.911154541534  
ACCAGTGA -0.694574014241  
ACCAGTGC -1.20925005545  
ACCAGTGG -1.23373837422  
ACCAGTTA 0.866758877817  
ACCAGTTC -0.69102340667  
ACCAGTTG 0.835121511077  
ACCATAAA 1.77019560503  
ACCATAAC -0.2935728282  
ACCATAAG 0.506860470174  
ACCATAAT 1.68085720592  
ACCATACA 0.190290505201  
ACCATACC 1.38968699733  
ACCATACG 0.50760932844  
ACCATACT 0.134450248396  
ACCATAGA 0.0250019335978  
ACCATAGC -0.748147569864  
ACCATAGG 0.529864402868  
ACCATAGT -0.25883260056  
ACCATATA 1.53775653367  
ACCATATC 4.61245409045  
ACCATATG 0.251621082385  
ACCATCAA -0.194629962422  
ACCATCAC -0.342735046663  
ACCATCAG 0.145484472381  
ACCATCAT 0.784027159872  
ACCATCCA -0.136394404691  
ACCATCCC 0.85681984271  
ACCATCCG -0.406322915292

ACCATCCT -0.406573318859  
ACCATCGA -0.136254565539  
ACCATCGC 0.238257425636  
ACCATCGG -1.10787686362  
ACCATCGT -0.042139679181  
ACCATCTA 1.24883107021  
ACCATCTC -0.589176591384  
ACCATCTG -0.0975073580642  
ACCATGAA 1.94251534151  
ACCATGAC -0.159876665702  
ACCATGAG -0.256128085208  
ACCATGAT 0.984665762374  
ACCATGCA 0.0014438719245  
ACCATGCC -0.212984700707  
ACCATGCG -0.897365878313  
ACCATGCT -0.420513844786  
ACCATGGA -0.286062812245  
ACCATGGC -0.720063947275  
ACCATGGG -0.396399301699  
ACCATGGT -0.282810441073  
ACCATGTA 0.382572215384  
ACCATGTC -0.697251607289  
ACCATGTG -0.193733162174  
ACCATTAA 0.723929258285  
ACCATTAC 0.139913646471  
ACCATTAG -0.28715747836  
ACCATTAT 1.67875622067  
ACCATTCA 1.01310094321  
ACCATTCC 0.180986627367  
ACCATTCCG -0.0352358071423  
ACCATTCT -0.373888596073  
ACCATTGA -0.196617769444  
ACCATTGC 0.494672769215  
ACCATTGG -0.373910552127  
ACCATTTA 0.0674048240438  
ACCATTTC 0.511052246795  
ACCATTTG 0.249908771564  
ACCCAAAA 2.12853382594  
ACCCAAAC 0.185226498202  
ACCCAAAG 0.317423375877  
ACCCAAAT 0.574024823151  
ACCCAACA 0.355818763726  
ACCCAACC -0.0271136354946  
ACCCAACG 0.0701846172946  
ACCCAACT -0.353690594789  
ACCCAAGA -0.014913649601  
ACCCAAGC -0.680261803687  
ACCCAAGG -1.59114581527  
ACCCAAGT -0.702906859453  
ACCCAATA 1.25147389951  
ACCCAATC 1.32968214759  
ACCCAATG -0.187668847815  
ACCCACAA -0.524088131025  
ACCCACAC -0.148445925839



ACCCACAG -0.831426620866  
ACCCACAT -0.44033624072  
ACCCACCA -0.327701422911  
ACCCACCC -0.137627341669  
ACCCACCG -0.448583091388  
ACCCACCT -0.854502433499  
ACCCACGA 0.0303563355481  
ACCCACGC -0.753053963762  
ACCCACGG -0.319745489957  
ACCCACGT -0.95602879495  
ACCCACTA 0.331185116794  
ACCCACTC 0.100021326234  
ACCCACTG -1.05559662412  
ACCCAGAA 0.21547462177  
ACCCAGAC -0.296188735191  
ACCCAGAG -0.305005136352  
ACCCAGAT 3.6382425463  
ACCCAGCA -0.331538504709  
ACCCAGCC -0.4545216812  
ACCCAGCG -0.808469998241  
ACCCAGCT -0.923246838211  
ACCCAGGA -0.41995527232  
ACCCAGGC -1.24875108744  
ACCCAGGG -0.549557937676  
ACCCAGGT -1.44356506251  
ACCCAGTA 0.057081035231  
ACCCAGTC -0.329372696822  
ACCCAGTG 0.245623420332  
ACCCATAA 1.04314466637  
ACCCATAC 0.455325690983  
ACCCATAG 0.0138187221044  
ACCCATAT 1.75000413828  
ACCCATCA -0.568394140856  
ACCCATCC -0.377116135994  
ACCCATCG -0.776547986945  
ACCCATCT -0.444404645228  
ACCCATGA 0.287615941676  
ACCCATGC -0.497450471413  
ACCCATGG -0.522279109014  
ACCCATTA 1.62856232905  
ACCCATTC -0.0810042469909  
ACCCATTG -0.440168172355  
ACCCCAAA 0.136070814278  
ACCCCAAC 0.668263604384  
ACCCCAAG -0.204863574585  
ACCCCAAT -1.29992646694  
ACCCACA -0.426791185144  
ACCCACC -0.731206906003  
ACCCACG -0.992091613456  
ACCCCACT -0.280507407849  
ACCCCAGA -0.974279241979  
ACCCCAGC -0.596388109559  
ACCCCAGG -1.14939001112  
ACCCCAGT -0.468727248064

ACCCATA 0.116655650867  
ACCCATC -0.52766879748  
ACCCATG -0.450206793849  
ACCCCAA -0.388207079785  
ACCCAC -1.02588041209  
ACCCAG -1.04015707475  
ACCCAT -0.785628644898  
ACCCCA -0.901482115654  
ACCCCC -1.55147201005  
ACCCCG -1.35714812547  
ACCCCT -1.17758524365  
ACCCCGA 0.0757557045862  
ACCCCGC -0.884416250009  
ACCCCGG -1.14172473449  
ACCCCGT -0.881635672613  
ACCCCTA -0.44731408375  
ACCCCTC -0.854700560747  
ACCCCTG -1.51789257807  
ACCCGAA -0.261260835567  
ACCCGAC -0.949313379041  
ACCCGAG -1.2232073098  
ACCCGAT 3.14256005999  
ACCCGCA -0.327701422911  
ACCCGCC -0.790892608816  
ACCCGCG -0.728432863147  
ACCCGCT -0.839291593026  
ACCCGGA -0.80044244673  
ACCCGGC -0.762801144779  
ACCCGGG -0.398484342674  
ACCCGGT -0.640992355789  
ACCCGTA -0.336339561825  
ACCCGTC -0.724400006535  
ACCCGTG 0.26211215418  
ACCCCTAA -0.105609141948  
ACCCCTAC -0.498266243368  
ACCCCTAG -0.205335629744  
ACCCCTAT -0.172921436907  
ACCCCTCA -0.29493070558  
ACCCCTCC -0.883528859497  
ACCCCTCG -0.919570506094  
ACCCCTCT -0.658626987782  
ACCCCTGA -0.369341601866  
ACCCCTGC -0.368043580871  
ACCCCTGG -1.08142060283  
ACCCCTTA -0.31878987885  
ACCCCTTC -1.54019182598  
ACCCCTTG -0.137959296294  
ACCCGAAA -0.388089980831  
ACCCGAAC -0.640601328924  
ACCCGAAG -0.74821579046  
ACCCGAAT 2.25165292086  
ACCCGACA -0.285705242225  
ACCCGACC -0.974324460994  
ACCCGACG -1.34905156922

ACCCGACT -0.776266217587  
ACCCGAGA 1.13343083514  
ACCCGAGC -0.773684812966  
ACCCGAGG -0.588854569261  
ACCCGAGT -0.858563519323  
ACCCGATA 2.77254357085  
ACCCGATC 0.877168399792  
ACCCGATG -0.576513698688  
ACCCGCAA 0.438378753963  
ACCCGCAC -0.466701540711  
ACCCGCAG -0.96819035775  
ACCCGCAT -0.231232795301  
ACCCGCCA -0.458038831927  
ACCCGCCC 0.409708068314  
ACCCGCCG -0.759799699937  
ACCCGCCT -0.382297503329  
ACCCGCGA -0.341959266093  
ACCCGCGC -0.365101992413  
ACCCGCGG -0.189961164393  
ACCCGCGT -0.224383290633  
ACCCGCTA -0.930502791257  
ACCCGCTC -1.55465746753  
ACCCGCTG -0.258240309868  
ACCCGGAA -0.219324772647  
ACCCGGAC -0.564619267878  
ACCCGGAG -0.0182998481495  
ACCCGGAT 2.09548891932  
ACCCGGCA -1.45150897191  
ACCCGGCC -0.0697619632573  
ACCCGGCG -0.912026510532  
ACCCGGCT -0.903917146582  
ACCCGGGA -1.03856264703  
ACCCGGGC -1.6962199091  
ACCCGGGG -1.42510524882  
ACCCGGGT -0.374527412688  
ACCCGGTA -0.0389066502465  
ACCCGGTC -1.79048691954  
ACCCGGTG -0.450575341896  
ACCCGTAA 0.215620211318  
ACCCGTAC -0.882155821985  
ACCCGTAG -0.913302314091  
ACCCGTAT 0.75627104842  
ACCCGTCA -0.850740106837  
ACCCGTCC -0.701851923341  
ACCCGTCC -1.01206796315  
ACCCGTCT -1.32009728454  
ACCCGTGA -0.204783591818  
ACCCGTGC -0.521908469914  
ACCCGTGG -0.449546543943  
ACCCGTTA -0.137627341669  
ACCCGTTC -0.014292606934  
ACCCGTTG -1.430572829  
ACCCTAAA 0.557499756024  
ACCCTAAC -0.745389209904

ACCCTAAG 0.319570887052  
ACCCTAAT -0.36712351766  
ACCCTACA -0.409426560338  
ACCCTACC 0.141492129916  
ACCCTACG -0.86303026938  
ACCCTACT 1.01292372649  
ACCCTAGA 1.53479978508  
ACCCTAGC -0.109887174494  
ACCCTAGG -0.149069059559  
ACCCTAGT -0.223714415135  
ACCCTATA 0.768461885957  
ACCCTATC 0.293864530059  
ACCCTATG -0.468324459028  
ACCCTCAA -0.359176210299  
ACCCTCAC -0.552793319045  
ACCCTCAG -0.728795138036  
ACCCTCAT -0.559932957281  
ACCCTCCA -0.553985219113  
ACCCTCCC -0.364336667107  
ACCCTCCG -1.09872537125  
ACCCTCCT -1.33986191514  
ACCCTCGA -0.856537550589  
ACCCTCGC -0.817467275464  
ACCCTCGG 0.306672750921  
ACCCTCGT -0.456842488372  
ACCCTCTA -0.619499470089  
ACCCTCTC -1.74200586151  
ACCCTCTG -0.590928370827  
ACCCTGAA 0.0508167639525  
ACCCTGAC -0.141795332565  
ACCCTGAG -0.641383382653  
ACCCTGAT -0.142957435132  
ACCCTGCA -0.77227178407  
ACCCTGCC -0.257709705232  
ACCCTGCG -1.19627036827  
ACCCTGCT -1.08170629291  
ACCCTGGA 0.228363086782  
ACCCTGGC -0.600770694743  
ACCCTGGG -1.53234802573  
ACCCTGTA -0.925925999548  
ACCCTGTC -0.612622520354  
ACCCTGTG -0.468488345287  
ACCCTTAA -0.339403999631  
ACCCTTAC -0.890910798471  
ACCCTTAG -0.59163253284  
ACCCTTAT -0.895807259869  
ACCCTTCA -0.546870412128  
ACCCTTCC -0.283740959547  
ACCCTTCG -1.10945142634  
ACCCTTCT -0.784837442813  
ACCCTTGA -0.848271619064  
ACCCTTGC -0.53642926298  
ACCCTTGG -0.539067648788  
ACCCTTTA -0.800925479915

ACCCTTTC -1.31755848512  
ACCCTTTG -1.14429855905  
ACCGAAAA 1.89862518979  
ACCGAAAC 0.338456229972  
ACCGAAAG -0.21453992119  
ACCGAAAT 3.50184003878  
ACCGAACA -0.916864161071  
ACCGAACC -0.91924351772  
ACCGAACG -0.249717701619  
ACCGAACT -0.0574339003827  
ACCGAAGA -0.864524326571  
ACCGAAGC -1.1426050677  
ACCGAAGG -1.09232988641  
ACCGAAGT -0.303216763487  
ACCGAATA 1.92975260104  
ACCGAATC 6.77728153484  
ACCGAATG -0.033648959486  
ACCGACAA 2.21068606089  
ACCGACAC -0.250630707526  
ACCGACAG -0.494881613109  
ACCGACAT -0.420697857428  
ACCGACCA -1.07061221254  
ACCGACCC -1.19226574087  
ACCGACCG -0.385210601193  
ACCGACCT -0.51420346329  
ACCGACGA 0.0198367719215  
ACCGACGC -0.587594709978  
ACCGACGG -0.985276872541  
ACCGACGT -0.888849543222  
ACCGACTA -0.253622742631  
ACCGACTC -1.02110941386  
ACCGACTG -1.20038921942  
ACCGAGAA 1.07370383403  
ACCGAGAC -0.53307730542  
ACCGAGAG 0.558575602665  
ACCGAGAT 2.31424466423  
ACCGAGCA -0.473449106557  
ACCGAGCC -1.43802743206  
ACCGAGCG 0.742304384333  
ACCGAGCT -1.2685831545  
ACCGAGGA -0.299735944802  
ACCGAGGC -0.303000339528  
ACCGAGGG -1.49729570847  
ACCGAGGT -0.258132097888  
ACCGAGTA -0.229265114662  
ACCGAGTC -0.279366477192  
ACCGAGTG -0.300234399501  
ACCGATAA 0.781495940517  
ACCGATAC 1.1420739403  
ACCGATAG 0.105328940879  
ACCGATAT 3.96882099641  
ACCGATCA -0.027649467762  
ACCGATCC 0.995607980038  
ACCGATCG 0.87231715741

ACCGATCT 0.481026297581  
ACCGATGA 0.578797128292  
ACCGATGC 0.11941113563  
ACCGATGG -0.839001459456  
ACCGATTA 1.11767161608  
ACCGATTC 3.54685099477  
ACCGATTG 0.795841346533  
ACCGCAAA 0.805304144376  
ACCGCAAC 0.718212058682  
ACCGCAAG -0.852083869611  
ACCGCAAT 3.69693029419  
ACCGCACA 0.326772472726  
ACCGCACC -1.08915985044  
ACCGCACG -0.161103590904  
ACCGCACT -0.54663778251  
ACCGCAGA -0.20660594429  
ACCGCAGC -0.038391467125  
ACCGCAGG -1.06710028945  
ACCGCAGT -0.937021648208  
ACCGCATA -0.199079461295  
ACCGCATC -0.448434626643  
ACCGCATG -0.596890484983  
ACCGCCAA -0.188083399022  
ACCGCCAC -1.25997690414  
ACCGCCAG -0.761923164005  
ACCGCCAT 0.0943443793969  
ACCGCCCA -0.815113795593  
ACCGCCCC -0.936363227973  
ACCGCCCG 0.173957814927  
ACCGCCCT 0.145620129428  
ACCGCCGA 0.164503642677  
ACCGCCGC -1.12748989289  
ACCGCCGG -0.512311060551  
ACCGCCGT -0.64858209313  
ACCGCCTA 0.0819449593472  
ACCGCCTC -2.13650335074  
ACCGCCTG -0.678764348536  
ACCGCGAA 0.399814513605  
ACCGCGAC -0.0123074137286  
ACCGCGAG -0.796951172781  
ACCGCGAT 2.45521220129  
ACCGCGCA -0.0468521279368  
ACCGCGCC 0.662260976081  
ACCGCGCG 1.03662084317  
ACCGCGCT -0.636784634891  
ACCGCGGA -0.158338696404  
ACCGCGGC -0.742816430876  
ACCGCGGG -0.238616563946  
ACCGCGGT 0.917460372486  
ACCGCGTA 0.575635979296  
ACCGCGTC -0.0525873628693  
ACCGCGTG -0.7422693592  
ACCGCTAA -0.467833323013  
ACCGCTAC -1.36326706858

ACCGCTAG -0.511313628389  
ACCGCTAT -0.42619523511  
ACCGCTCA 0.263179376466  
ACCGCTCC -0.706734792896  
ACCGCTCG -0.148379012151  
ACCGCTCT -0.709124604808  
ACCGCTGA -0.55841250055  
ACCGCTGC -0.92194777169  
ACCGCTGG -0.911385602863  
ACCGCTTA 0.185908181398  
ACCGCTTC -0.595657286623  
ACCGCTTG -0.392777075572  
ACCGGAAA -0.0547254643071  
ACCGGAAC -1.24142900486  
ACCGGAAG -0.9581851931  
ACCGGAAT 2.05957169036  
ACCGGACA 0.39852642511  
ACCGGACC -0.399390814041  
ACCGGACG -1.4677321433  
ACCGGACT -1.02468354578  
ACCGGAGA 0.389232741159  
ACCGGAGC -0.656398186931  
ACCGGAGG -0.432339532237  
ACCGGAGT -0.331844843937  
ACCGGATA 1.75625743154  
ACCGGATC 2.87869429546  
ACCGGATG 0.712469243683  
ACCGGCAA 0.17358926688  
ACCGGCAC -0.227568748118  
ACCGGCAG -0.560234330259  
ACCGGCAT -0.345850192499  
ACCGGCCA -1.18358970162  
ACCGGCCC -1.1753734326  
ACCGGCCG -0.605064932949  
ACCGGCCT -1.18920130306  
ACCGGCGA 0.0685980310198  
ACCGGCGC -0.824206738481  
ACCGGCGG 0.0726863005294  
ACCGGCGT -0.573284851859  
ACCGGCTA -0.552895257867  
ACCGGCTC -1.24732655776  
ACCGGCTG -1.78117337059  
ACCGGAA -0.631508386037  
ACCGGAC -1.03514848065  
ACCGGAG -1.24175024283  
ACCGGAT 0.700164443771  
ACCGGCA -0.997105173808  
ACCGGCC -0.56979200962  
ACCGGCG -1.31613996721  
ACCGGCT -1.87691561875  
ACCGGGA -0.646091910685  
ACCGGGC -0.395734869688  
ACCGGGG -0.781158758261  
ACCGGTA 0.00635470931

ACCGGGTC -0.975592684488  
ACCGGGTG 0.18549519848  
ACCGGTAA 1.32736421561  
ACCGGTAC -0.656398186931  
ACCGGTAG -0.271851494987  
ACCGGTAT 1.44508996273  
ACCGGTCA 0.302169668822  
ACCGGTCC -0.236853545095  
ACCGGTCCG -1.29992542142  
ACCGGTCT -0.138131808146  
ACCGGTGA -0.346854943346  
ACCGGTGC -0.832715232124  
ACCGGTGG -0.77371826981  
ACCGGTTA -0.110129997995  
ACCGGTTT -0.231265990763  
ACCGGTTG -0.939127861091  
ACCGTAAA 0.0653359887284  
ACCGTAAC 0.0662853266773  
ACCGTAAG 1.36192330581  
ACCGTAAT 2.5066458258  
ACCGTACA 0.382572215384  
ACCGTACC -0.221273111048  
ACCGTACG 0.093112487945  
ACCGTACT -0.0109641737178  
ACCGTAGA -1.02609004013  
ACCGTAGC -1.07427416867  
ACCGTAGG -0.772817026074  
ACCGTAGT -0.126472098007  
ACCGTATA 0.957912833479  
ACCGTATC 3.08461123787  
ACCGTATG 0.1084712704  
ACCGTCAA -0.120276308706  
ACCGTCAC -0.00468291263565  
ACCGTCAG -0.497552148853  
ACCGTCAT -0.441157763069  
ACCGTCCA -0.189191134217  
ACCGTCCC -0.917348501164  
ACCGTCCG 0.505556176021  
ACCGTCCT -1.00943245254  
ACCGTCGA -0.383174699958  
ACCGTCGC -0.0236043262154  
ACCGTCGG -0.764120860447  
ACCGTCGT -0.809702151074  
ACCGTCTA -0.900448090068  
ACCGTCTC -0.616796000263  
ACCGTCTG -0.63847368275  
ACCGTGAA 0.164714839005  
ACCGTGAC -1.70720865268  
ACCGTGAG -0.362789810834  
ACCGTGAT 1.00824943944  
ACCGTGCA 1.02475255052  
ACCGTGCC -0.869317019476  
ACCGTGCG -0.0993124593515  
ACCGTGCT 0.226846028011



ACCGTGGA -0.171220104113  
ACCGTGGC -1.06885154613  
ACCGTGGG -1.03613493478  
ACCGTGTA 0.913845203662  
ACCGTGTC -0.788746143168  
ACCGTGTG -0.528256383303  
ACCGTTAA 1.13001797567  
ACCGTTAC 0.57436409646  
ACCGTTAG 0.889586900698  
ACCGTTAT 0.421092020872  
ACCGTTCA -0.880295046418  
ACCGTTCC 0.512064316326  
ACCGTTCCG -1.31653099408  
ACCGTTCT -0.78750353507  
ACCGTTGA -0.162634241518  
ACCGTTGC -0.423083748617  
ACCGTTGG -0.356860630759  
ACCGTTTA 0.931935685155  
ACCGTTTC -0.427824687966  
ACCGTTTG -0.229792059955  
ACCTAAAA 1.46153870643  
ACCTAAAC -0.198830364636  
ACCTAAAG -0.180301023447  
ACCTAAAT 2.19251690354  
ACCTAACA 0.224193266215  
ACCTAACC 0.426813141198  
ACCTAACG -0.364948038655  
ACCTAACT -0.01981194067  
ACCTAAGA -0.136678003721  
ACCTAAGC -0.523994817796  
ACCTAAGG -0.392393367392  
ACCTAAGT -0.256357839629  
ACCTAATA 0.795562190991  
ACCTAATC 1.22759590676  
ACCTAATG 0.356990798793  
ACCTACAA 0.10136874835  
ACCTACAC -0.991762795411  
ACCTACAG -0.879321661363  
ACCTACAT 0.0299535465119  
ACCTACCA -0.348456951135  
ACCTACCC 0.238325646232  
ACCTACCG -1.04421659229  
ACCTACCT -0.288817512863  
ACCTACGA -0.365508702174  
ACCTACGC -0.671306086137  
ACCTACGG -0.52385602417  
ACCTACGT -0.134293158058  
ACCTACTA 0.427581603084  
ACCTACTC -0.152454473963  
ACCTACTG 0.459125917976  
ACCTAGAA -0.719161396631  
ACCTAGAC -0.901496753023  
ACCTAGAG -0.81920650859  
ACCTAGAT 3.76847095919

ACCTAGCA 0.0344788460465  
ACCTAGCC 0.355640501479  
ACCTAGCG -0.148530874857  
ACCTAGCT -0.210821506636  
ACCTAGGA 0.00967582384162  
ACCTAGGC 0.409670690746  
ACCTAGGG 0.0633824226959  
ACCTAGGT 0.436809418874  
ACCTAGTA -0.324497407333  
ACCTAGTC -0.799952356241  
ACCTAGTG -0.56534617009  
ACCTATAA 0.184546906057  
ACCTATAC -0.201153001479  
ACCTATAG 0.421351834176  
ACCTATAT 1.10716381463  
ACCTATCA 0.484681980553  
ACCTATCC -0.580255114823  
ACCTATCG -0.363855724974  
ACCTATCT 0.847813939894  
ACCTATGA 0.00293426977271  
ACCTATGC -0.413865342565  
ACCTATGG -0.443663367028  
ACCTATTA 0.354679139977  
ACCTATTC 0.180453147534  
ACCTATTG 0.199643261393  
ACCTCAAA 1.54016124434  
ACCTCAAC -0.334596669357  
ACCTCAAG 0.270899543222  
ACCTCAAT 0.598330436183  
ACCTCACA 0.265256053229  
ACCTCACC -0.332960681961  
ACCTCACG -0.25308795589  
ACCTCACT -0.635871890365  
ACCTCAGA -0.368533932741  
ACCTCAGC -0.520474791872  
ACCTCAGG -0.909923695609  
ACCTCAGT -0.608761652831  
ACCTCATA 0.675726310271  
ACCTCATC -0.0833227017285  
ACCTCATG -0.82923624311  
ACCTCCAA -0.546990647661  
ACCTCCAC -1.19435653223  
ACCTCCAG -0.709162243758  
ACCTCCAT -0.390227820887  
ACCTCCCA -1.18651665271  
ACCTCCCC -1.15833971689  
ACCTCCCG -0.103039238117  
ACCTCCCT -1.53643603386  
ACCTCCGA -0.716939391702  
ACCTCCGC -1.19397752892  
ACCTCCGG -0.647073137188  
ACCTCCGT -0.677626293077  
ACCTCCTA -0.91286267025  
ACCTCCTC -1.20199619346

ACCTCCTG -0.653544945452  
ACCTCGAA 0.661948886458  
ACCTCGAC -0.725366857051  
ACCTCGAG -1.0055007506  
ACCTCGAT 1.89954891234  
ACCTCGCA -0.606893035817  
ACCTCGCC -1.4323266995  
ACCTCGCG -0.920147898034  
ACCTCGCT -0.696332066841  
ACCTCGGA -0.346273107918  
ACCTCGGC -1.37609410892  
ACCTCGGG -0.962586336377  
ACCTCGTA 0.818098250632  
ACCTCGTC -0.958475849432  
ACCTCGTG -0.376392631742  
ACCTCTAA -0.383344336612  
ACCTCTAC -0.059321336872  
ACCTCTAG -0.652503339801  
ACCTCTAT 0.349431643098  
ACCTCTCA -0.744048322327  
ACCTCTCC -1.33332371595  
ACCTCTCG -0.438301907775  
ACCTCTCT -1.21862398355  
ACCTCTGA -0.111517411495  
ACCTCTGC -0.734295913679  
ACCTCTGG -1.48620319639  
ACCTCTTA -0.0987619897148  
ACCTCTTC -0.603874601171  
ACCTCTTG -0.125892876395  
ACCTGAAA 0.486550074804  
ACCTGAAC -1.08920846742  
ACCTGAAG -0.873184421539  
ACCTGAAT 0.854087359528  
ACCTGACA -0.127628972941  
ACCTGACC -0.486202698666  
ACCTGACG -0.595867698806  
ACCTGACT -1.33672141529  
ACCTGAGA 0.26128435991  
ACCTGAGC -0.979376444441  
ACCTGAGG -0.437121769879  
ACCTGAGT -0.479725140007  
ACCTGATA 0.904994561512  
ACCTGATC 1.08652224878  
ACCTGATG 1.7633356451  
ACCTGCAA 0.277802108353  
ACCTGCAC -0.0100532588632  
ACCTGCAG -0.925451330574  
ACCTGCAT 0.29681657378  
ACCTGCCA -0.734827302459  
ACCTGCCC -1.06306926251  
ACCTGCCG -1.02760814443  
ACCTGCCT -1.13102743138  
ACCTGCGA -0.408865635437  
ACCTGCGC -0.164093796338

ACCTGCGG -1.10551423539  
ACCTGCGT 0.09900063111  
ACCTGCTA -0.269184357203  
ACCTGCTC -0.986371800037  
ACCTGCTG -0.985016536473  
ACCTGGAA -0.135903530058  
ACCTGGAC -0.502009489173  
ACCTGGAG -0.914112074269  
ACCTGGAT 2.709313795  
ACCTGGCA -1.13910255434  
ACCTGGCC -0.415003398024  
ACCTGGCG -0.735864464624  
ACCTGGCT -1.02153520448  
ACCTGGGA -0.545724515221  
ACCTGGGC -1.09384328584  
ACCTGGGG -0.718252050066  
ACCTGGTA -0.295586511999  
ACCTGGTC -1.00218878443  
ACCTGGTG -0.681769452721  
ACCTGTAA 0.0374915302973  
ACCTGTAC -0.11857314624  
ACCTGTAG -0.677800895981  
ACCTGTAT 1.46295513329  
ACCTGTCA -0.123717136007  
ACCTGTCC -0.5306961191  
ACCTGTCCG -0.00479687501058  
ACCTGTCT -1.35670848163  
ACCTGTGA -0.298231693729  
ACCTGTGC -0.623646027694  
ACCTGTGG -0.568108189393  
ACCTGTTA 0.550041232243  
ACCTGTTC -0.722066130284  
ACCTGTTG -0.455863614303  
ACCTTAAA 0.479591835394  
ACCTTAAC -0.0698416846434  
ACCTTAAG -0.907890930953  
ACCTTAAT 0.846139790785  
ACCTTACA 0.0918659591239  
ACCTTACC 0.504305987857  
ACCTTACG -0.321803608627  
ACCTTACT 0.265687071477  
ACCTTAGA -0.0368866932891  
ACCTTAGC -0.155364696629  
ACCTTAGG 0.0138493037508  
ACCTTAGT 0.358122581094  
ACCTTATA 0.393947019586  
ACCTTATC -0.145646528969  
ACCTTATG -0.207225941431  
ACCTTCAA 0.420947215469  
ACCTTCAC -0.029985696448  
ACCTTCAG -0.834404541365  
ACCTTCAT -0.463731200279  
ACCTTCCA -0.295916375571  
ACCTTCCC -0.773451660584

ACCTTCCG 0.0429387227135  
ACCTTCCT -1.10187972433  
ACCTTCGA -0.507940237538  
ACCTTCGC -0.372252608677  
ACCTTCGG -0.785130712961  
ACCTTCGT -1.0105775653  
ACCTTCTA -0.988738871751  
ACCTTCTC -0.76632875077  
ACCTTCTG -0.724032504014  
ACCTTGAA 0.35683292431  
ACCTTGAC -0.275888272322  
ACCTTGAG -0.245547096907  
ACCTTGAT 1.2526001928  
ACCTTGCA 0.0425116251891  
ACCTTGCC -0.394975294776  
ACCTTGCG 0.11891424922  
ACCTTGCT -0.631310258789  
ACCTTGGA 0.178291521753  
ACCTTGGC -1.18612039821  
ACCTTGGG -0.854403631256  
ACCTTGTA 0.313255384981  
ACCTTGTC -0.826890081923  
ACCTTGTG -0.870161282024  
ACCTTTAA 2.22301752172  
ACCTTTAC 0.703032322618  
ACCTTTAG -0.596702290235  
ACCTTTAT 0.229708156464  
ACCTTTCA 0.257567513645  
ACCTTTCC -0.942421269174  
ACCTTTCCG -0.158752724849  
ACCTTTCT 0.0715045943436  
ACCTTTGA 1.92314252192  
ACCTTTGC -0.292450978399  
ACCTTTGG -1.03035578774  
ACCTTTTA 0.0990795683513  
ACCTTTTC 0.0641840800442  
ACCTTTTG -0.664556952002  
ACGAAAAA 1.65785458013  
ACGAAAAC 0.283360649328  
ACGAAAAG 0.694811871491  
ACGAAAAT 2.9166395842  
ACGAAACA 1.00452449035  
ACGAAACC -0.58411990307  
ACGAAACG 0.460838228798  
ACGAAACT 0.717870432939  
ACGAAAGA 2.42520481017  
ACGAAAGC -0.615915405673  
ACGAAAGG 0.0582794698389  
ACGAAAGT 2.06210839873  
ACGAAATA 2.388055167  
ACGAAATC 25.9070264388  
ACGAAATG 0.723386630096  
ACGAACAA 0.413083027454  
ACGAACAC 0.149860523025

ACGAACAG -0.0612589586273  
ACGAACAT 0.0385861964124  
ACGAACCA 0.803736900339  
ACGAACCC -0.326983669054  
ACGAACCG 0.128384365747  
ACGAACCT -0.0819067976345  
ACGAACGA 0.51221748594  
ACGAACGC -0.0962945474687  
ACGAACGG -0.808172023224  
ACGAACGT -0.608450870116  
ACGAACTA 0.449406182027  
ACGAACTC -0.505211413698  
ACGAACTG 0.613233107757  
ACGAAGAA 0.848165498137  
ACGAAGAC -0.605268810592  
ACGAAGAG 0.213284244013  
ACGAAGAT 3.6805921149  
ACGAAGCA -0.448539963425  
ACGAAGCC 0.010155720448  
ACGAAGCG -0.918921756978  
ACGAAGCT -0.612927291292  
ACGAAGGA -0.0605636835876  
ACGAAGGC -1.34051249393  
ACGAAGGG -0.620156060652  
ACGAAGTA -0.154899437392  
ACGAAGTC -0.135563472604  
ACGAAGTG 0.0998075160902  
ACGAATAA 0.615267440702  
ACGAATAC 1.43026492149  
ACGAATAG 0.902819605269  
ACGAATAT 3.06156679102  
ACGAATCA 2.37111476452  
ACGAATCC 5.86201598359  
ACGAATCG 2.91004257415  
ACGAATCT 10.5886765794  
ACGAATGA 1.93174955642  
ACGAATGC -0.884206883352  
ACGAATGG -0.864799561389  
ACGAATTA 1.70233022662  
ACGAATTC 1.17349383756  
ACGAATTG 1.37262818899  
ACGACAAA 0.457464053803  
ACGACAAC 1.47826033251  
ACGACAAG -0.434419606961  
ACGACAAT 1.18631277507  
ACGACACA -0.677973146452  
ACGACACC 0.427526712949  
ACGACACG -1.18212883989  
ACGACACT -0.0140923886331  
ACGACAGA -0.177885857519  
ACGACAGC -0.801353100203  
ACGACAGG -0.440433213291  
ACGACAGT 0.738832714004  
ACGACATA 0.457416220971

ACGACATC 1.26653444556  
ACGACATG -0.0562555921576  
ACGACCAA 0.361419648519  
ACGACCAC -0.531699301657  
ACGACCAG -1.20370562908  
ACGACCAT -1.14331759393  
ACGACCCA -0.601985857773  
ACGACCCC -1.14461718321  
ACGACCCG -1.04267836161  
ACGACCCT -0.906336233233  
ACGACCGA -1.23158981752  
ACGACCGC -1.31935731325  
ACGACCGG -0.406458572339  
ACGACCGT -0.242789521092  
ACGACCTA -0.0810395335061  
ACGACCTC -0.331440486611  
ACGACCTG -0.519596026953  
ACGACGAA -0.525037730356  
ACGACGAC -0.525037730356  
ACGACGAG -0.717232139087  
ACGACGAT 2.07163811026  
ACGACGCA 0.017411412112  
ACGACGCC -0.648564580563  
ACGACGCG -0.083761300043  
ACGACGCT -0.1875057457  
ACGACGGA 0.370394446926  
ACGACGGC 0.135789306301  
ACGACGGG -1.33598196676  
ACGACGTA -0.240708400841  
ACGACGTC 0.811093223917  
ACGACGTG -0.023620009111  
ACGACTAA -0.296376668557  
ACGACTAC 0.697998374502  
ACGACTAG -0.587850079796  
ACGACTAT 0.0922954090826  
ACGACTCA -0.185632423817  
ACGACTCC -0.316209519755  
ACGACTCG -0.982025808276  
ACGACTCT -0.575324935199  
ACGACTGA 0.338744272488  
ACGACTGC 0.0380474889475  
ACGACTGG -0.0278622323794  
ACGACTTA 0.7252568154  
ACGACTTC -0.0769366266272  
ACGACTTG 0.135795056697  
ACGAGAAA 0.734269514138  
ACGAGAAC -0.237551433951  
ACGAGAAG 0.277163814501  
ACGAGAAT 3.6360584417  
ACGAGACA 0.434003748845  
ACGAGACC -1.31328280501  
ACGAGACG -0.41997330765  
ACGAGACT -0.577537007628  
ACGAGAGA 0.523922415095

ACGAGAGC -0.596501026408  
ACGAGAGG -0.346604278397  
ACGAGAGT -0.478325964335  
ACGAGATA 3.63535140449  
ACGAGATC 8.68226718433  
ACGAGATG -0.214900889171  
ACGAGCAA 0.39320652553  
ACGAGCAC -1.11112845064  
ACGAGCAG -0.20363116037  
ACGAGCAT 0.664565316213  
ACGAGCCA -0.65252294342  
ACGAGCCC -1.25330330928  
ACGAGCCG -1.57296567989  
ACGAGCCT -0.319233704796  
ACGAGCGA -0.407208998895  
ACGAGCGC -0.65403163798  
ACGAGCGG -0.807238890933  
ACGAGCGT -0.334898303716  
ACGAGCTA -0.95255869291  
ACGAGCTC -0.773327242946  
ACGAGCTG -0.607115471553  
ACGAGGAA 0.88432136849  
ACGAGGAC -0.876078961309  
ACGAGGAG -1.46512512328  
ACGAGGAT 2.737215496  
ACGAGGCA -0.738422344901  
ACGAGGCC -1.36415106113  
ACGAGGCG -0.407842587879  
ACGAGGCT -1.01177051089  
ACGAGGGA -0.905390293245  
ACGAGGGC -1.18280424993  
ACGAGGGG -0.91037327195  
ACGAGGTA -0.890298120015  
ACGAGGTC -0.290818388964  
ACGAGGTG -0.00071252622487  
ACGAGTAA 0.661948886458  
ACGAGTAC 0.411884070083  
ACGAGTAG -0.58995969064  
ACGAGTAT 1.29885950728  
ACGAGTCA -1.15014540392  
ACGAGTCC -1.16788589546  
ACGAGTCG -0.489928170523  
ACGAGTCT -0.587082402054  
ACGAGTGA 1.0412114881  
ACGAGTGC -0.267021685895  
ACGAGTGG -0.305301020317  
ACGAGTTA 0.222381369006  
ACGAGTTC -0.635124600388  
ACGAGTTG 0.00162030450036  
ACGATAAA 0.905715974711  
ACGATAAC 0.976672190471  
ACGATAAG 0.758919889492  
ACGATAAT 1.66796063808  
ACGATACA 0.629168498009



ACGATACC 0.68989998858  
ACGATACG 2.0039266856  
ACGATACT 2.84378521531  
ACGATAGA -1.18098895476  
ACGATAGC -0.370478089036  
ACGATAGG 0.307819170592  
ACGATAGT 0.894614052893  
ACGATATA 1.47229978665  
ACGATATC 15.0146037982  
ACGATATG 2.02321690861  
ACGATCAA 0.570482841173  
ACGATCAC 1.24261280209  
ACGATCAG 1.24538972015  
ACGATCAT 0.849759403097  
ACGATCCA 2.7480322505  
ACGATCCC 1.45804194347  
ACGATCCG 2.64883741287  
ACGATCCT 2.65698938202  
ACGATCGA 2.3216608442  
ACGATCGC 2.59646490567  
ACGATCGG 1.27908468279  
ACGATCGT 1.55563947818  
ACGATCTA 2.77184176127  
ACGATCTC 4.02566260611  
ACGATCTG 2.46766729562  
ACGATGAA -0.308375390624  
ACGATGAC 0.467763795509  
ACGATGAG -0.203605806356  
ACGATGAT 2.13006813589  
ACGATGCA -0.122946321687  
ACGATGCC -0.434673408489  
ACGATGCG -0.200875414226  
ACGATGCT 1.31389888142  
ACGATGGA 1.34853717024  
ACGATGGC -0.357899622595  
ACGATGGG -0.452863999132  
ACGATGTA 0.156026253443  
ACGATGTC 0.788070733129  
ACGATGTG 0.367190169967  
ACGATTAA 0.476582810486  
ACGATTAC 5.81730718473  
ACGATTAG 0.354843810381  
ACGATTAT 1.38152770949  
ACGATTCA 0.69095936818  
ACGATTCC 5.43865046562  
ACGATTCG 4.53233749535  
ACGATTCT 7.63473365962  
ACGATTGA -0.0732223941784  
ACGATTGC 6.10523992089  
ACGATTGG 0.612369502971  
ACGATTTA 3.80192231419  
ACGATTTT 6.27327116956  
ACGATTTG 3.65627421693  
ACGCAAAA 1.31040264123

ACGCAAAC 0.272471492128  
ACGCAAAG -0.457986555609  
ACGCAAAT 1.80011517193  
ACGCAACA 1.1940758084  
ACGCAACC 0.44236482327  
ACGCAACG -0.275710532839  
ACGCAACT 1.1139905791  
ACGCAAGA 0.364122856963  
ACGCAAGC 2.06154224619  
ACGCAAGG 0.422412520684  
ACGCAAGT -0.648104026195  
ACGCAATA 2.87605068202  
ACGCAATC 17.2749988878  
ACGCAATG 0.964340206872  
ACGCACAA -0.0075983629336  
ACGCACAC 0.0815949693931  
ACGCACAG -0.335561167438  
ACGCACAT 1.06932307852  
ACGCACCA -1.00008309431  
ACGCACCC -0.180441646744  
ACGCACCG 0.350353274598  
ACGCACCT -1.24072458146  
ACGCACGA 1.30369924887  
ACGCACGC -0.739927380119  
ACGCACGG -0.368804724072  
ACGCACGT -0.147785414552  
ACGCACTA 0.773303195839  
ACGCACTC 0.040964507535  
ACGCACTG 0.0258344339742  
ACGCAGAA -0.419001490884  
ACGCAGAC -0.173055525665  
ACGCAGAG 0.31000327519  
ACGCAGAT 2.37580081373  
ACGCAGCA -0.479974236666  
ACGCAGCC -0.505861208341  
ACGCAGCG -0.179102327457  
ACGCAGCT -0.413214241014  
ACGCAGGA -0.635988989319  
ACGCAGGC -0.592368583409  
ACGCAGGG -0.797517848076  
ACGCAGTA 0.147049102602  
ACGCAGTC -0.935265948042  
ACGCAGTG -0.790218244304  
ACGCATAA 0.23294641303  
ACGCATAC 0.679888550771  
ACGCATAG -0.49635946464  
ACGCATAT 1.30688862708  
ACGCATCA 0.366259912874  
ACGCATCC -0.106901412548  
ACGCATCG 0.113958192819  
ACGCATCT 0.343232717218  
ACGCATGA -0.698585437562  
ACGCATGC -0.346038387247  
ACGCATGG -1.12102095983

ACGCATTA 1.10201093789  
ACGCATTC -0.081714682163  
ACGCATTG -0.0192729718235  
ACGCCAAA -0.935000122961  
ACGCCAAC 0.10028793546  
ACGCCAAG 0.122712907924  
ACGCCAAT 1.15357002557  
ACGCCACA 0.406530452278  
ACGCCACC -0.803860272451  
ACGCCACG -1.53237390251  
ACGCCACT -0.757112174389  
ACGCCAGA 0.404540292822  
ACGCCAGC -0.288869005037  
ACGCCAGG -1.24843011085  
ACGCCAGT -0.693034999416  
ACGCCATA 0.421650331956  
ACGCCATC 0.294514586083  
ACGCCATG -0.27597975588  
ACGCCCAA -0.59293944081  
ACGCCCAC -0.00257879080505  
ACGCCCAG -1.02510384738  
ACGCCCAT -1.09294413316  
ACGCCCCA 0.168589036989  
ACGCCCCC -1.50410888109  
ACGCCCCG -1.14484301691  
ACGCCCCT -0.77027116935  
ACGCCCGA -0.606863238315  
ACGCCCGC -0.613545720144  
ACGCCCGG -1.38184528813  
ACGCCCGT -0.739360704823  
ACGCCCTA -0.802320996245  
ACGCCCTC -0.875916381958  
ACGCCCTG -1.00817912779  
ACGCCGAA 0.214981917465  
ACGCCGAC -0.723630237741  
ACGCCGAG -0.901906860744  
ACGCCGAT 0.995900727423  
ACGCCGCA -0.871866796924  
ACGCCGCC -0.774165232336  
ACGCCGCG -0.86304333846  
ACGCCGCT -0.296263490327  
ACGCCGGA -0.133297294186  
ACGCCGGC -0.189976324525  
ACGCCGGG -0.960480646257  
ACGCCGTA -0.258746344634  
ACGCCGTC -0.418835774953  
ACGCCGTG -1.40186345888  
ACGCCTAA -0.361569158791  
ACGCCTAC -0.98342524533  
ACGCCTAG -0.721912699288  
ACGCCTAT -0.475728092674  
ACGCCTCA -0.210588877017  
ACGCCTCC -1.14484719901  
ACGCCTCG -1.28154349945

ACGCCTCT -1.13910255434  
ACGCCTGA -0.851886003744  
ACGCCTGC -0.475614653062  
ACGCCTGG -0.865673360057  
ACGCCTTA 0.187246455159  
ACGCCTTC -0.229792059955  
ACGCCTTG -0.453016645983  
ACGCGAAA 0.0920682684776  
ACGCGAAC -0.19814057861  
ACGCGAAG 0.343821871331  
ACGCGAAT 2.13746863296  
ACGCGACA 0.23294641303  
ACGCGACC -0.198341058292  
ACGCGACG 0.228225338682  
ACGCGACT -0.982645805417  
ACGCGAGA 0.520177601  
ACGCGAGC 0.641165390404  
ACGCGAGG -0.428108025614  
ACGCGAGT -0.57034300202  
ACGCGATA 3.63160188553  
ACGCGATC 9.01935037679  
ACGCGATG 0.457596574271  
ACGCGCAA 1.36785954319  
ACGCGCAC 0.356663287656  
ACGCGCAG -0.820956196979  
ACGCGCAT 0.761637735305  
ACGCGCCA -0.0468521279368  
ACGCGCCC -0.917496704528  
ACGCGCCG -0.705105601421  
ACGCGCCT -0.751942046462  
ACGCGCGA 0.015664076157  
ACGCGCGC 0.247902406449  
ACGCGCGG 0.349091585645  
ACGCGCGT 0.396150989185  
ACGCGCTA 0.336992493046  
ACGCGCTC 0.167690407069  
ACGCGCTG -0.620351574085  
ACGCGGAA -0.430677406682  
ACGCGGAC -1.1447792398  
ACGCGGAG -0.401862699774  
ACGCGGAT 2.37133354091  
ACGCGGCA -0.72496981841  
ACGCGGCC -0.796586545457  
ACGCGGCG -0.864239943397  
ACGCGGCT -1.70794365773  
ACGCGGGA 0.0359326504715  
ACGCGGGC -0.625147926332  
ACGCGGGG 0.170716421781  
ACGCGGTA -0.554684153495  
ACGCGGTC -0.522571333636  
ACGCGGTG -0.480307498198  
ACGCGTAA 1.24332480556  
ACGCGTAC -0.449650051054  
ACGCGTAG 0.358252749128

ACGCGTAT 1.72046932509  
ACGCGTCA 0.182366722183  
ACGCGTCC -0.378396905804  
ACGCGTCG 0.153568482316  
ACGCGTCT 0.0540793290071  
ACGCGTGA 1.39224958247  
ACGCGTGC -0.400907872812  
ACGCGTGG 0.101903796473  
ACGCGTTA 1.21472181774  
ACGCGTTC -0.19504451363  
ACGCGTTG -0.0841322005247  
ACGCTAAA 0.444002640337  
ACGCTAAC -0.0969375461896  
ACGCTAAG -0.262621065381  
ACGCTAAT 0.61735300444  
ACGCTACA 1.44001863704  
ACGCTACC 0.505693401357  
ACGCTACG -0.895298872669  
ACGCTACT 1.32721758054  
ACGCTAGA -0.0743928609557  
ACGCTAGC -0.843020462844  
ACGCTAGG -0.617943726842  
ACGCTAGT -0.750792490212  
ACGCTATA -0.0449053578257  
ACGCTATC 1.87237306803  
ACGCTATG -0.33023002845  
ACGCTCAA -0.220831898918  
ACGCTCAC -0.171784688356  
ACGCTCAG 0.03800854309  
ACGCTCAT -0.673090538278  
ACGCTCCA -0.265174763553  
ACGCTCCC -0.616110134961  
ACGCTCCG -0.60460751516  
ACGCTCCT -0.451448879183  
ACGCTCGA -0.395859025945  
ACGCTCGC -0.518938390863  
ACGCTCGG -0.0790020639819  
ACGCTCTA 0.0452639733725  
ACGCTCTC -0.507351606189  
ACGCTCTG -1.33792586168  
ACGCTGAA 0.353931588618  
ACGCTGAC -0.67058179774  
ACGCTGAG -0.555063679569  
ACGCTGAT 1.46946588741  
ACGCTGCA -0.238170646946  
ACGCTGCC -1.16445813724  
ACGCTGCG 0.00497095515209  
ACGCTGCT -0.215909560742  
ACGCTGGA -1.30298201778  
ACGCTGGC 0.945209688017  
ACGCTGGG -1.04886944604  
ACGCTGTA -0.278777061698  
ACGCTGTC -0.915887116673  
ACGCTGTG -0.969175243595

ACGCTTAA -0.332086883293  
ACGCTTAC -0.154149794981  
ACGCTTAG 0.0538163791237  
ACGCTTAT 1.25005982508  
ACGCTTCA -0.640417839045  
ACGCTTCC -1.09064188408  
ACGCTTCG -0.764947349046  
ACGCTTCT 0.0139630047442  
ACGCTTGA -0.440714982649  
ACGCTTGC 0.529289886125  
ACGCTTGG -0.549488932935  
ACGCTTTA 0.700887948022  
ACGCTTTC -0.456943120286  
ACGCTTTG 0.140574157759  
ACGGAAAA 0.243693901406  
ACGGAAAC -0.271251885611  
ACGGAAAG -0.143558612797  
ACGGAAAT 3.04530519654  
ACGGAAACA 0.0688361496518  
ACGGAAACC 0.143164449354  
ACGGAACG -0.733313903031  
ACGGAACT 0.560980313328  
ACGGAAGA 0.539840815543  
ACGGAAGC -0.807660760826  
ACGGAAGG -0.83553188018  
ACGGAAGT -0.179857720264  
ACGGAATA 2.7858092095  
ACGGAATC 13.4950762783  
ACGGAATG 1.559680699  
ACGGACAA 0.653109483717  
ACGGACAC -0.450712567233  
ACGGACAG -0.58783936315  
ACGGACAT -0.878519742633  
ACGGACCA -0.683753861782  
ACGGACCC -0.586040796403  
ACGGACCG -0.727793001005  
ACGGACCT -1.22647248867  
ACGGACGA 0.123723931929  
ACGGACGC -1.32539261425  
ACGGACGG -1.00040537781  
ACGGACGT -0.728480434597  
ACGGACTA 0.10161967468  
ACGGACTC -0.946532278882  
ACGGACTG -1.0540461085  
ACGGAGAA 0.782029943113  
ACGGAGAC -0.795142412151  
ACGGAGAG -0.758521543943  
ACGGAGAT 3.92172892017  
ACGGAGCA -0.15451050158  
ACGGAGCC 0.39075319789  
ACGGAGCG -1.01213435407  
ACGGAGCT -0.593318182739  
ACGGAGGA -1.20764203589  
ACGGAGGC -0.791641467083

ACGGAGGG -1.37551541007  
ACGGAGTA -0.0598514187444  
ACGGAGTC -1.20131712408  
ACGGAGTG -0.112806545516  
ACGGATAA 0.495312631357  
ACGGATAC 2.82440716808  
ACGGATAG 0.936131905262  
ACGGATAT 6.67361158293  
ACGGATCA 0.819787821255  
ACGGATCC 2.81875270006  
ACGGATCG 1.8977830183  
ACGGATCT 4.58012223281  
ACGGATGA -0.530765646604  
ACGGATGC 0.730819277099  
ACGGATGG -0.590920006616  
ACGGATTA 2.2972723732  
ACGGATTC 5.76814967113  
ACGGATTG 5.48928373969  
ACGGCAAA 0.466659719656  
ACGGCAAC 0.402496811521  
ACGGCAAG -0.42388619011  
ACGGCAAT 1.27192831614  
ACGGCACA 0.202159320615  
ACGGCACC -0.200589985526  
ACGGCACG -0.966546790287  
ACGGCACT -0.50728782908  
ACGGCAGA 0.0265477443439  
ACGGCAGC -0.795417124206  
ACGGCAGG -1.54830537204  
ACGGCAGT -1.08251762138  
ACGGCATA -0.457602586047  
ACGGCATC -0.100064192815  
ACGGCATG -0.885529474217  
ACGGCCAA 0.00911542170438  
ACGGCCAC -1.06170537335  
ACGGCCAG -0.289052494916  
ACGGCCAT -0.624343916549  
ACGGCCCA -0.932142699377  
ACGGCCCC -0.287310125211  
ACGGCCCG -1.65722804845  
ACGGCCCT -0.357754033047  
ACGGCCGA -0.273302946978  
ACGGCCGC -0.365711011527  
ACGGCCGG -0.226086975862  
ACGGCCGT 0.168729660286  
ACGGCCTA 0.341087035714  
ACGGCCTC -1.2591566887  
ACGGCCTG -0.404652164144  
ACGGCGAA -0.572604998334  
ACGGCGAC -0.466599079126  
ACGGCGAG -0.192730240998  
ACGGCGAT 1.05804864485  
ACGGCGCA -0.0487257112016  
ACGGCGCC -0.368804724072

ACGGCGCG -0.207124525372  
ACGGCGCT -0.992716838228  
ACGGCGGA -0.772359608285  
ACGGCGGC -1.11043474389  
ACGGCGGG 0.150720468469  
ACGGCGTA 0.661498525972  
ACGGCGTC -1.01356881626  
ACGGCGTG 0.0784095119086  
ACGGCTAA -0.357884462462  
ACGGCTAC -0.907746909695  
ACGGCTAG 0.00450857111254  
ACGGCTAT 0.373681843232  
ACGGCTCA -0.880006219757  
ACGGCTCC -0.364527998433  
ACGGCTCG -1.23730858541  
ACGGCTCT -0.201287874381  
ACGGCTGA -0.547378276565  
ACGGCTGC -0.749699131005  
ACGGCTGG -0.817010380438  
ACGGCTTA -0.94432621823  
ACGGCTTC -1.16492705582  
ACGGCTTG -0.959113097758  
ACGGGAAA 1.57953733593  
ACGGGAAC -0.366001145096  
ACGGGAAG -0.36423054618  
ACGGGAAT 3.34196650966  
ACGGGACA -0.534501312343  
ACGGGACC -1.20906813386  
ACGGGACG -0.79224944067  
ACGGGACT -0.767428644517  
ACGGGAGA -0.449626788092  
ACGGGAGC -1.44637491464  
ACGGGAGG -0.263474737667  
ACGGGAGT -0.739648224576  
ACGGGATA 1.72927370269  
ACGGGATC 1.4799901559  
ACGGGATG 0.298775890208  
ACGGGCAA -0.608029522987  
ACGGGCAC -0.699292474773  
ACGGGCAG -0.961652419942  
ACGGGCAT -0.910168871544  
ACGGGCCA -1.07334547987  
ACGGGCCC -1.0934263822  
ACGGGCCG -1.71718140602  
ACGGGCCT -0.901194334519  
ACGGGCGA 0.0202126386534  
ACGGGCGC -0.0504518752475  
ACGGGCGG -0.959306520137  
ACGGGCTA -0.045887891237  
ACGGGCTC -0.537111730321  
ACGGGCTG -0.39360983733  
ACGGGGAA 1.08132284611  
ACGGGGAC -0.893839840612  
ACGGGGAG -0.711379282437



ACGGGGAT 2.37890027667  
ACGGGGCA -1.00802961752  
ACGGGGCC -0.679561823779  
ACGGGGCG -1.10786118072  
ACGGGGCT 0.0410212273409  
ACGGGGGA -0.1292654831  
ACGGGGGC -1.14631198147  
ACGGGGGG -0.671024316779  
ACGGGGTA -0.302865466625  
ACGGGGTC -1.63497506508  
ACGGGGTG -0.385846281229  
ACGGGTAA -0.388546353093  
ACGGGTAC -0.840513290595  
ACGGGTAG 0.260814395804  
ACGGGTAT 0.832678638701  
ACGGGTCA -1.70481230623  
ACGGGTCC -1.33405845961  
ACGGGTCCG -1.0755319369  
ACGGGTCT -1.50331009894  
ACGGGTGA -0.196643646221  
ACGGGTGC -0.896136077914  
ACGGGTGG -0.121714168854  
ACGGGTTA -0.648919014004  
ACGGGTTC -0.25654498885  
ACGGGTTG -0.448642163628  
ACGGTAAA 0.677511285175  
ACGGTAAC 0.542448096942  
ACGGTAAG -0.435729912891  
ACGGTAAT 2.38052920677  
ACGGTACA -0.296963731617  
ACGGTACC 0.18009662304  
ACGGTACG 0.592159478134  
ACGGTACT -0.61269727549  
ACGGTAGA -0.322710341376  
ACGGTAGC -1.27744817263  
ACGGTAGG -0.0305965452328  
ACGGTAGT 0.304603131461  
ACGGTATA 0.867076195072  
ACGGTATC 4.11207353137  
ACGGTATG -0.55318434591  
ACGGTCAA -0.254539669262  
ACGGTCAC -0.364305039934  
ACGGTCAG -0.441890677059  
ACGGTCAT 0.0334171140122  
ACGGTCCA -0.583573615538  
ACGGTCCC -1.29296064747  
ACGGTCCG -1.15331439437  
ACGGTCCT -0.465959739748  
ACGGTCGA 0.0296422410336  
ACGGTCGC -0.243171660982  
ACGGTCGG -0.498725490828  
ACGGTCTA -1.12385982532  
ACGGTCTC -0.437653158659  
ACGGTCTG -0.457032774173

ACGGTGAA 0.898966056431  
ACGGTGAC -0.0530356323028  
ACGGTGAG 0.310953135902  
ACGGTGAT 2.44464271378  
ACGGTGCA -0.122525758702  
ACGGTGCC -1.46291906263  
ACGGTGCG -1.16540982762  
ACGGTGCT -0.761146337908  
ACGGTGGA 0.583891716938  
ACGGTGGC -0.803860272451  
ACGGTGGG -0.910509713142  
ACGGTGTA -0.285971851451  
ACGGTGTC -0.740597301144  
ACGGTGTG 0.466788842164  
ACGGTTAA 0.192679010206  
ACGGTTAC -0.355087156645  
ACGGTTAG -0.520797075377  
ACGGTTAT 0.751103011546  
ACGGTTCA -0.159876665702  
ACGGTTCC -0.658403506519  
ACGGTTCG 0.588668988329  
ACGGTTCT 0.957549513064  
ACGGTTGA 0.303404958235  
ACGGTTGC 0.192906150811  
ACGGTTGG 0.0484434190802  
ACGGTTTA 0.197422040608  
ACGGTTTC -0.56824881269  
ACGGTTTG -0.26273241394  
ACGTAAAA -0.203921032558  
ACGTAAAC 0.563932618431  
ACGTAAAG -0.360392418855  
ACGTAAAT 1.80831392839  
ACGTAACA 1.55064682836  
ACGTAACC 0.997457254815  
ACGTAACG 0.602688974261  
ACGTAACT 0.149357102076  
ACGTAAGA 1.36941188847  
ACGTAAGC 0.114984376956  
ACGTAAGG -0.249717701619  
ACGTAAGT 0.39202743316  
ACGTAATA 3.88847726071  
ACGTAATC 15.1871948488  
ACGTAATG 1.21133797162  
ACGTACAA 0.672996179523  
ACGTACAC -0.0652207194455  
ACGTACAG -0.311638478442  
ACGTACAT 1.12765822264  
ACGTACCA -0.316770967419  
ACGTACCC -0.336614535262  
ACGTACCG -1.2361200833  
ACGTACCT -0.271179744291  
ACGTACGA -0.0774201825759  
ACGTACGC -0.871174658464  
ACGTACGG -0.821568352672

ACGTACGT -0.242096337105  
ACGTACTA 0.332508753185  
ACGTACTC -0.351875822382  
ACGTACTG -0.71708837921  
ACGTAGAA 1.04637168353  
ACGTAGAC -0.230659324084  
ACGTAGAG 0.384196179227  
ACGTAGAT 2.32720866853  
ACGTAGCA -0.14058095368  
ACGTAGCC -0.295831165171  
ACGTAGCG -0.184016824185  
ACGTAGCT 0.0172747095384  
ACGTAGGA 0.531289455318  
ACGTAGGC -0.576357915258  
ACGTAGGG -0.646781696711  
ACGTAGTA 0.911896603879  
ACGTAGTC -0.261537900056  
ACGTAGTG 0.506568245552  
ACGTATAA 1.62171282439  
ACGTATAC 0.496933197239  
ACGTATAG -0.249876098864  
ACGTATAT 1.33998999212  
ACGTATCA 1.51759042094  
ACGTATCC 4.54920497236  
ACGTATCG 2.09176057226  
ACGTATCT 3.77543233518  
ACGTATGA 0.0169030249119  
ACGTATGC -0.104790494796  
ACGTATGG -0.199168069655  
ACGTATTA 1.33239790235  
ACGTATTC 0.422658742145  
ACGTATTG 2.09348752045  
ACGTCAAA 0.160928465236  
ACGTCAAC 0.665936785436  
ACGTCAAG -0.137959296294  
ACGTCAAT 0.370483316668  
ACGTCACA 0.103013099957  
ACGTCACC -0.704727643636  
ACGTCACG -0.509149388791  
ACGTCACT 0.316443717663  
ACGTCAGA -0.389746878754  
ACGTCAGC -0.00738507555301  
ACGTCAGG -0.488759010654  
ACGTCAGT -0.65015482618  
ACGTCATA 1.05259570204  
ACGTCATC 0.447744579235  
ACGTCATG -0.0897354377523  
ACGTCCAA -0.288869005037  
ACGTCCAC -0.665037371371  
ACGTCCAG -0.236605755344  
ACGTCCAT 0.257566729501  
ACGTCCCA -0.651156963211  
ACGTCCCC -0.872358978465  
ACGTCCCG -0.759815382832

ACGTCCCT -0.238241481358  
ACGTCCGA -0.424690461274  
ACGTCCGC -0.753053963762  
ACGTCCGG 0.285095177585  
ACGTCCTA 1.83151102208  
ACGTCCTC -0.657979284192  
ACGTCCTG -0.266712210088  
ACGTCGAA 0.355439237652  
ACGTCGAC -0.0243403767837  
ACGTCGAG -0.689033769978  
ACGTCGAT 2.06603173645  
ACGTCGCA -0.650099413282  
ACGTCGCC 0.627019679926  
ACGTCGCG 0.228225338682  
ACGTCGCT -0.311731268907  
ACGTCGGA 1.7976461614  
ACGTCGGC -1.06959857472  
ACGTCGGG -0.796228452674  
ACGTCGTA 0.515022633206  
ACGTCGTC -0.172875172365  
ACGTCGTG 0.527677161691  
ACGTCTAA 0.576737964096  
ACGTCTAC -0.815020743746  
ACGTCTAG -0.209241193519  
ACGTCTAT 0.369560639642  
ACGTCTCA -0.50476392841  
ACGTCTCC -1.50150369075  
ACGTCTCG -0.375711994072  
ACGTCTCT -0.330548391231  
ACGTCTGA -0.274560715207  
ACGTCTGC -0.128703251292  
ACGTCTGG -0.188339552984  
ACGTCTTA 0.285289906872  
ACGTCTTC -0.381282035837  
ACGTCTTG -0.494479085454  
ACGTGAAA 2.13154023703  
ACGTGAAC 0.736842554548  
ACGTGAAG -0.692434083132  
ACGTGAAT 1.33681838786  
ACGTGACA -0.153965259575  
ACGTGACC -0.7618664442  
ACGTGACG -0.874427552399  
ACGTGACT -0.998494416979  
ACGTGAGA -0.282608393101  
ACGTGAGC 0.0644880668379  
ACGTGAGG -0.262965566322  
ACGTGAGT -0.434225139055  
ACGTGATA 1.99476499936  
ACGTGATC 3.30838367971  
ACGTGATG -0.761386286212  
ACGTGCAA 1.43202663343  
ACGTGCAC 1.03286086894  
ACGTGCAG 0.0865356042803  
ACGTGCAT 0.220961021425

ACGTGCCA 0.185175790172  
ACGTGCCC -1.33135812637  
ACGTGCCG -0.644158732417  
ACGTGCCT -1.11545849813  
ACGTGCGA 0.151314327451  
ACGTGCGC 0.114467102782  
ACGTGCGG -0.438508660616  
ACGTGCTA -0.0294718202344  
ACGTGCTC -1.07694287475  
ACGTGCTG 0.313960853903  
ACGTGGAA 0.284537389263  
ACGTGGAC -0.0371099131703  
ACGTGGAG -0.87680560214  
ACGTGGAT 3.24987759203  
ACGTGGCA -0.513912284195  
ACGTGGCC -1.10958943582  
ACGTGGCG -0.432142189134  
ACGTGGCT -0.521211365203  
ACGTGGGA 0.240389515297  
ACGTGGGC -0.550275952915  
ACGTGGGG -0.922045005643  
ACGTGGTA -0.220831898918  
ACGTGGTC -0.526579097615  
ACGTGGTG -0.61257599443  
ACGTGTAA 1.54632932719  
ACGTGTAC -0.737027612716  
ACGTGTAG -0.492032030972  
ACGTGTAT -0.561028407541  
ACGTGTCA -0.394738483052  
ACGTGTCC -0.149140939498  
ACGTGTCC -0.520201125343  
ACGTGTCT 0.874851513344  
ACGTGTGA 0.309828149522  
ACGTGTGC 0.181704642606  
ACGTGTGG -0.747245803365  
ACGTGTTA -0.38644014021  
ACGTGTTC -0.856970921271  
ACGTGTTG 0.79712002529  
ACGTTAAA 1.01390390746  
ACGTTAAC -0.146868487921  
ACGTTAAG 0.163810720072  
ACGTTAAT 0.363321460996  
ACGTTACA 0.0606585651062  
ACGTTACC 1.30428082292  
ACGTTACG 0.286473965492  
ACGTTACT -0.548666103678  
ACGTTAGA 0.524189024321  
ACGTTAGC -0.0410290687887  
ACGTTAGG -0.309275588833  
ACGTTAGT 0.241877822092  
ACGTTATA 1.70039809388  
ACGTTATC 1.70813551182  
ACGTTATG -0.0942706697874  
ACGTTCOA -0.109410675849

ACGTTCAC -0.284788838357  
ACGTTCAG -0.50252545644  
ACGTTCAT -0.350060527213  
ACGTTCCA 0.284537389263  
ACGTTCCC -1.22528424795  
ACGTTCCG 0.441005638982  
ACGTTCCCT -0.465229439575  
ACGTTCGA 0.403067930304  
ACGTTCGC -0.55284820918  
ACGTTCGG 0.547309533206  
ACGTTCTA 0.85575549686  
ACGTTCTC -0.280914640372  
ACGTTCTG -0.5613201094  
ACGTTGAA 0.49371088495  
ACGTTGAC -0.257559672198  
ACGTTGAG -1.22568311626  
ACGTTGAT 0.835121511077  
ACGTTGCA 1.00240886773  
ACGTTGCC -0.464234621228  
ACGTTGCG -0.894148270893  
ACGTTGCT 0.0468348767516  
ACGTTGGA -0.616930611784  
ACGTTGGC -0.497428253978  
ACGTTGGG -0.527261826338  
ACGTTGTA -0.139808832452  
ACGTTGTC -0.366326826562  
ACGTTGTG -0.368491066159  
ACGTTTAA 0.165016473364  
ACGTTTAC 0.529938635241  
ACGTTTAG 0.21586983074  
ACGTTTAT 0.718497226001  
ACGTTTCA 0.847070570641  
ACGTTTCC 0.567385730667  
ACGTTTCG 0.646697531838  
ACGTTTCT 0.655327306541  
ACGTTTGA -0.0648547852141  
ACGTTTGC 0.0301456619834  
ACGTTTGG 0.578397737217  
ACGTTTTA 0.404339028995  
ACGTTTTC 0.669239864637  
ACGTTTTG 0.00420928918757  
ACTAAAAA 1.23525464884  
ACTAAAAC 0.158029481978  
ACTAAAAG 0.841005733518  
ACTAAAAT 4.37577514826  
ACTAAACA 0.534629912088  
ACTAAACC -0.368785120453  
ACTAAACG 0.448488994014  
ACTAAACT 0.298009780756  
ACTAAAGA 0.996359190739  
ACTAAAGC -0.560522111394  
ACTAAAGG -1.42138029973  
ACTAAAGT -0.066640805645  
ACTAAATA 1.20256182323

ACTAAATC 3.58411642999  
ACTAAATG 0.756051487881  
ACTAACAA -0.116488889411  
ACTAACAC -0.718854273258  
ACTAACAG 0.33045638491  
ACTAACAT 0.898249870864  
ACTAACCA -0.52535164965  
ACTAACCC -0.967694255485  
ACTAACCG -0.181247486198  
ACTAACCT -0.0696069639721  
ACTAACGA 0.285792282296  
ACTAACGC 0.172718343409  
ACTAACGG 1.08322178339  
ACTAACTA -0.436290053647  
ACTAACTC 0.990447784612  
ACTAACTG 0.167743206151  
ACTAAGAA 0.802129142155  
ACTAAGAC -0.466501845174  
ACTAAGAG -0.0899811364506  
ACTAAGAT 2.81489000287  
ACTAAGCA 0.485416985595  
ACTAAGCC -0.482108678761  
ACTAAGCG -0.167366816656  
ACTAAGCT -0.511313628389  
ACTAAGGA 1.27481475308  
ACTAAGGC -0.891899343659  
ACTAAGGG -1.14304837089  
ACTAAGTA 0.971062418703  
ACTAAGTC 0.646091387922  
ACTAAGTG -0.428747364993  
ACTAATAA 0.561876852195  
ACTAATAC 1.06638880875  
ACTAATAG 0.438529832525  
ACTAATAT 2.50848386117  
ACTAATCA 0.149833862103  
ACTAATCC 0.572618590176  
ACTAATCG 0.625065329748  
ACTAATCT 0.539560091711  
ACTAATGA -0.412717354604  
ACTAATGC 0.669751127035  
ACTAATGG 0.2438502076  
ACTAATTA 0.33611085293  
ACTAATTC 2.24954148034  
ACTAATTG 0.950628128458  
ACTACAAA 0.304434278951  
ACTACAAC 0.532511414269  
ACTACAAG -0.548145692925  
ACTACAAT 1.33749275238  
ACTACACA -0.148448016892  
ACTACACC 0.105398468383  
ACTACACG 0.437079687442  
ACTACACT -0.21595347285  
ACTACAGA 1.61744498572  
ACTACAGC -0.0536067510854

ACTACAGG 0.27430534539  
ACTACAGT -0.0307196559635  
ACTACATA 0.236977962734  
ACTACATC 1.07367089995  
ACTACATG 0.824921878521  
ACTACCAA 0.649049704801  
ACTACCAC -0.187834040982  
ACTACCAG -0.768212005154  
ACTACCAT 0.656572789836  
ACTACCCA -0.371974237279  
ACTACCCC 0.128162975537  
ACTACCCG -0.558448048447  
ACTACCCT 0.189104355528  
ACTACCGA 0.0331891892624  
ACTACCGC -0.817899077858  
ACTACCGG -0.0775161096208  
ACTACCTA -0.0884823743913  
ACTACCTC -0.198478283629  
ACTACCTG -1.15833658031  
ACTACGAA 0.274904170622  
ACTACGAC -0.105199818372  
ACTACGAG 0.616584542554  
ACTACGAT 2.71762154758  
ACTACGCA 0.384430115753  
ACTACGCC -1.31549513882  
ACTACGCG 0.679789748529  
ACTACGCT -0.554230395048  
ACTACGGA 1.02720587816  
ACTACGGC -1.45344737781  
ACTACGGG -0.904203098046  
ACTACGTA 0.707178880224  
ACTACGTC -0.234078718095  
ACTACGTG -0.0481012705738  
ACTACTAA 1.5083477064  
ACTACTAC 0.402497072903  
ACTACTAG -0.934574070963  
ACTACTAT 2.93407844138  
ACTACTCA -0.306147112536  
ACTACTCC 0.0116576190863  
ACTACTCG 0.384927263545  
ACTACTCT 0.0413646827552  
ACTACTGA 1.46859391841  
ACTACTGC -1.17187876069  
ACTACTGG 1.2778334491  
ACTACTTA 1.36567752964  
ACTACTTC 0.672550262524  
ACTACTTG -0.793332344614  
ACTAGAAA 0.579700463081  
ACTAGAAC 0.0818142685503  
ACTAGAAG 0.919718186694  
ACTAGAAT 1.06016113089  
ACTAGACA 0.191895910951  
ACTAGACC -1.00761611184  
ACTAGACG -0.195304326934



ACTAGACT -0.841751455206  
ACTAGAGA -0.0783240401274  
ACTAGAGC -0.326666351799  
ACTAGAGG -0.736932469816  
ACTAGAGT 0.275070147934  
ACTAGATA 6.53034310371  
ACTAGATC 3.53386163646  
ACTAGATG 0.43286647753  
ACTAGCAA 0.263705537614  
ACTAGCAC -0.00212346406854  
ACTAGCAG -0.603458481673  
ACTAGCAT 0.808574028115  
ACTAGCCA -0.654735277231  
ACTAGCCC -0.831066959793  
ACTAGCCG 0.0912268811269  
ACTAGCCT -0.9628458883  
ACTAGCGA -0.183259601708  
ACTAGCGC -1.08857749225  
ACTAGCGG -0.597982014519  
ACTAGCTA 0.129236469743  
ACTAGCTC 0.373243506299  
ACTAGCTG -0.373613884018  
ACTAGGAA 1.62811353686  
ACTAGGAC 0.233738399259  
ACTAGGAG -0.28100612393  
ACTAGGAT 1.48890535931  
ACTAGGCA -0.0120457707532  
ACTAGGCC -1.23220432564  
ACTAGGCG -0.10353168104  
ACTAGGCT -0.537996507017  
ACTAGGGA 0.0627987575968  
ACTAGGGC -0.797446229519  
ACTAGGGG 0.292680994202  
ACTAGGTA -0.113488751476  
ACTAGGTC -0.804728059343  
ACTAGGTG 0.558130731192  
ACTAGTAA 0.479082402668  
ACTAGTAC -0.12583641797  
ACTAGTAG -0.686199609355  
ACTAGTAT 1.94853365271  
ACTAGTCA 0.0178356344388  
ACTAGTCC -0.830955611234  
ACTAGTCG -0.494479085454  
ACTAGTCT 0.196902936763  
ACTAGTGA -0.035438116496  
ACTAGTGC -0.289536573628  
ACTAGTGG -0.512812390448  
ACTAGTTA -0.257798574974  
ACTAGTTC -0.479829169881  
ACTAGTTG -0.63398523802  
ACTATAAA 0.671087309743  
ACTATAAC 0.266069211367  
ACTATAAG -0.0634610985556  
ACTATAAT 2.31586104801

ACTATACA 1.46602506011  
ACTATACC -0.0801929185236  
ACTATACG -0.431991894717  
ACTATACT -0.302048126381  
ACTATAGA 0.235105424995  
ACTATAGC 0.186930706193  
ACTATAGG -0.994107911071  
ACTATAGT 0.963022582257  
ACTATATA 1.78924274316  
ACTATATC 1.35656681281  
ACTATATG 0.609996158099  
ACTATCAA 1.874591675  
ACTATCAC 0.908500211449  
ACTATCAG -0.0322257367074  
ACTATCAT 0.8034321294  
ACTATCCA 1.75397713851  
ACTATCCC 0.139681016852  
ACTATCCG 0.913707455562  
ACTATCCT 0.152345216457  
ACTATCGA 0.358626002044  
ACTATCGC 0.634947645049  
ACTATCGG 0.536400511004  
ACTATCTA 1.64273522322  
ACTATCTC 2.1233822561  
ACTATCTG 0.895089506012  
ACTATGAA 1.73239747412  
ACTATGAC -0.103510770512  
ACTATGAG 0.165939673154  
ACTATGAT 1.02945558954  
ACTATGCA 1.12790392134  
ACTATGCC 0.373999421869  
ACTATGCG 0.488017993836  
ACTATGCT -0.867223352909  
ACTATGGA 0.779495848561  
ACTATGGC -0.16244761506  
ACTATGGG 0.194192932397  
ACTATGTA 0.550380244171  
ACTATGTC 0.733075784399  
ACTATGTG 0.302173328165  
ACTATTAA 0.315756806834  
ACTATTAC 2.09114292755  
ACTATTAG 0.806851000648  
ACTATTAT 1.11658897352  
ACTATTCA -0.0572995502435  
ACTATTCC -0.82143687773  
ACTATTCT 0.845103935528  
ACTATTGA 0.000203877643213  
ACTATTGC 0.889410468123  
ACTATTGG -0.62046893442  
ACTATTTA 0.0951622424041  
ACTATTTT -0.18275487385  
ACTATTTG 0.436713230447  
ACTCAAAA 1.67590637715

ACTCAAAC -0.469375735798  
ACTCAAAG 0.915046252085  
ACTCAAAT 1.45556117076  
ACTCAACA 0.75908351437  
ACTCAACC 0.303404958235  
ACTCAACG -1.21582484807  
ACTCAACT -0.289068700575  
ACTCAAGA 2.08023155292  
ACTCAAGC -0.585874296328  
ACTCAAGG 0.370680921153  
ACTCAAGT 0.356620421074  
ACTCAATA 0.837675732012  
ACTCAATC 1.47599441548  
ACTCAATG 2.02881910031  
ACTCACAA -0.116331537691  
ACTCACAC 0.100021326234  
ACTCACAG -0.152476691398  
ACTCACAT 0.00569602769346  
ACTCACCA 0.333415485934  
ACTCACCC -0.759074627395  
ACTCACCG -0.394504807907  
ACTCACCT 0.368671419459  
ACTCACGA -0.0741364456122  
ACTCACGC -0.166290970016  
ACTCACGG -1.40316383231  
ACTCACTA 0.0368710103935  
ACTCACTC 0.233039203496  
ACTCACTG -0.602345518846  
ACTCAGAA 1.59317361368  
ACTCAGAC -0.241367082458  
ACTCAGAG -0.522446393234  
ACTCAGAT 2.93006832497  
ACTCAGCA 1.21230456076  
ACTCAGCC -0.330875118223  
ACTCAGCG 0.151921255511  
ACTCAGCT 0.781068058848  
ACTCAGGA 0.27975802682  
ACTCAGGC -0.57013468089  
ACTCAGGG 0.237817259032  
ACTCAGTA 1.28376576576  
ACTCAGTC -0.984881402189  
ACTCAGTG -0.0190541954294  
ACTCATAA 0.730190131602  
ACTCATAC 0.725677901148  
ACTCATAG -0.0852778360506  
ACTCATAT 1.630111015  
ACTCATCA 0.880366403593  
ACTCATCC 0.183813730687  
ACTCATCG -0.486655672968  
ACTCATCT -0.761658645832  
ACTCATGA -0.153712242193  
ACTCATGC -0.573746190372  
ACTCATGG -0.381253283861  
ACTCATTAA 0.834359322349

ACTCATTG 0.964340206872  
ACTCATTG 0.709098205267  
ACTCCAAA 0.0333956807215  
ACTCCAAC -0.128225184357  
ACTCCAAG -0.0111270144508  
ACTCCAAT 0.498352760675  
ACTCCACA -0.254630368675  
ACTCCACC -0.593087382792  
ACTCCACG -0.42326462468  
ACTCCACT -0.370972623012  
ACTCCAGA -0.986005604424  
ACTCCAGC -0.353395233588  
ACTCCAGG -0.363530827653  
ACTCCAGT 0.107791678256  
ACTCCATA 0.673196659205  
ACTCCATC -0.791570632671  
ACTCCATG -0.510810730202  
ACTCCCAA -0.223632864077  
ACTCCCAC -0.71152251955  
ACTCCCAG -1.0108530615  
ACTCCCAT 0.309197174355  
ACTCCCCA -0.26233720497  
ACTCCCCC -1.5849908015  
ACTCCCCG -1.02752633199  
ACTCCCCT -1.31623354182  
ACTCCCGA 0.240926915854  
ACTCCCGC 0.609504237939  
ACTCCCGG -0.696104142092  
ACTCCCTA -0.864630970261  
ACTCCCTC -0.892391263819  
ACTCCCTG -0.448584398296  
ACTCCGAA 0.55067037774  
ACTCCGAC 0.0580507609442  
ACTCCGAG -0.716724013268  
ACTCCGAT 0.326900549707  
ACTCCGCA 0.504032844092  
ACTCCGCC -0.13975603337  
ACTCCGCG 0.278467585891  
ACTCCGCT -0.944197095723  
ACTCCGGA -0.262082096535  
ACTCCGGC 0.363779401549  
ACTCCGGG -0.551840321754  
ACTCCGTA 0.219041173618  
ACTCCGTC 0.0915972588454  
ACTCCGTG -0.916771893368  
ACTCCTAA 0.398704425976  
ACTCCTAC -0.663390405948  
ACTCCTAG -0.834553267492  
ACTCCTAT 0.518953289614  
ACTCCTCA -0.584369783873  
ACTCCTCC -0.318205429606  
ACTCCTCG 0.116959637661  
ACTCCTCT 0.250310515073  
ACTCCTGA 0.284796157041

ACTCCTGC -0.74583460414  
ACTCCTGG -1.12557919344  
ACTCCTTA 0.323839771243  
ACTCCTTC -1.1120861528  
ACTCCTTG -0.414468349902  
ACTCGAAA 1.01643016057  
ACTCGAAC 0.0186584636963  
ACTCGAAG -0.170872727975  
ACTCGAAT 0.893132542019  
ACTCGACA -0.59270001527  
ACTCGACC -0.432038682023  
ACTCGACG -0.676019580419  
ACTCGACT 0.355037755523  
ACTCGAGA 2.63845533596  
ACTCGAGC -0.0226236224752  
ACTCGAGG -0.674470894475  
ACTCGAGT -0.1580888156  
ACTCGATA 1.86915729028  
ACTCGATC 0.0909508621638  
ACTCGATG 0.5455472985  
ACTCGCAA 0.745126260021  
ACTCGCAC -0.692336849179  
ACTCGCAG 0.378987628206  
ACTCGCAT -0.333571530746  
ACTCGCCA -0.279640666484  
ACTCGCCC -0.146711658964  
ACTCGCCG -0.590636407586  
ACTCGCCT -0.189929014457  
ACTCGCGA 0.88908374113  
ACTCGCGC 0.390160907199  
ACTCGCGG -0.302145621716  
ACTCGCTA -0.744929701062  
ACTCGCTC -1.02696410018  
ACTCGCTG 0.18377818279  
ACTCGGAA 0.277168519369  
ACTCGGAC -0.525255199842  
ACTCGGAG -0.454277812173  
ACTCGGAT 2.5668103797  
ACTCGGCA -0.127307996344  
ACTCGGCC -1.18309987251  
ACTCGGCG -0.970183392403  
ACTCGGCT -0.550995536443  
ACTCGGGA -0.228544224226  
ACTCGGGC -0.896120133637  
ACTCGGGG -0.607640064412  
ACTCGGTA 0.265677138977  
ACTCGGTC -0.307475715178  
ACTCGGTG -0.65076645911  
ACTCGTAA 0.641435136209  
ACTCGTAC -0.36423054618  
ACTCGTAG 0.715142654625  
ACTCGTAT 0.222381369006  
ACTCGTCA 0.0468471616865  
ACTCGTCC 0.173152236855

ACTCGTCG -0.6335424576  
ACTCGTCT 0.147933095152  
ACTCGTGA 1.204118612  
ACTCGTGC -0.134884664605  
ACTCGTGG -0.3180109617  
ACTCGTTA -0.0653608199798  
ACTCGTTC 0.0240596529519  
ACTCGTTG -0.583132142026  
ACTCTAAA 1.45715742815  
ACTCTAAC -0.244257440123  
ACTCTAAG -0.38140070308  
ACTCTAAT 1.38128410185  
ACTCTACA 1.30928366662  
ACTCTACC -0.869981974251  
ACTCTACG -0.558225351329  
ACTCTACT -0.0715145268441  
ACTCTAGA 0.950243374752  
ACTCTAGC -1.06578397174  
ACTCTAGG -0.712814267387  
ACTCTATA 0.115172571704  
ACTCTATC -0.0434154827407  
ACTCTATG -0.28052387489  
ACTCTCAA -0.532604204735  
ACTCTCAC 0.462974239183  
ACTCTCAG 0.632193205813  
ACTCTCAT 0.952413887507  
ACTCTCCA -0.156481057416  
ACTCTCCC -0.476250855861  
ACTCTCCG -0.466701540711  
ACTCTCCT 0.0845768106158  
ACTCTCGA -0.582789209375  
ACTCTCGC -0.698247471161  
ACTCTCGG -0.00490848495115  
ACTCTCTA -0.730914681381  
ACTCTCTC -0.485647001398  
ACTCTCTG -0.19236482953  
ACTCTGAA 0.375496615638  
ACTCTGAC -0.595868482951  
ACTCTGAG -0.940647533678  
ACTCTGAT 1.57474621131  
ACTCTGCA -0.687805537868  
ACTCTGCC -0.516695475406  
ACTCTGCG 0.547655079673  
ACTCTGCT -1.28098074488  
ACTCTGGA 0.24174294919  
ACTCTGGC -1.19988788952  
ACTCTGGG 2.12880461727  
ACTCTGTA 1.00875834941  
ACTCTGTC -0.412749765922  
ACTCTGTG -0.352101917461  
ACTCTTAA 0.691341769451  
ACTCTTAC -0.193225559119  
ACTCTTAG 0.206475253493  
ACTCTTAT 0.298954675218

ACTCTTCA -0.698405345644  
ACTCTTCC -0.611018682894  
ACTCTTCG -0.33084009309  
ACTCTTCT 0.246227734577  
ACTCTTGA -0.655711276102  
ACTCTTGC -0.532371575117  
ACTCTTGG -0.274236863412  
ACTCTTTA 0.705025618653  
ACTCTTTC 0.527656773926  
ACTCTTTG 0.561427798617  
ACTGAAAA 0.928820539319  
ACTGAAAC 0.251161573543  
ACTGAAAG 0.147246445705  
ACTGAAAT 2.54261768352  
ACTGAACA -0.0418529435725  
ACTGAACC -0.512546826748  
ACTGAACG 0.22219840189  
ACTGAACT -0.470357223683  
ACTGAAGA 0.610971372826  
ACTGAAGC -0.792621909441  
ACTGAAGG -0.97540605803  
ACTGAAGT 0.960142941238  
ACTGAATA 1.64747511704  
ACTGAATC 2.62911015983  
ACTGAATG 0.164714839005  
ACTGACAA 1.54417031522  
ACTGACAC -0.665691348119  
ACTGACAG -0.0440629249487  
ACTGACAT 0.131215128409  
ACTGACCA -0.44868189363  
ACTGACCC -0.275034077274  
ACTGACCG 0.248171629491  
ACTGACCT 0.188598843526  
ACTGACGA 0.0497058921786  
ACTGACGC -0.808459020214  
ACTGACGG -0.574817070762  
ACTGACTA 0.867614379773  
ACTGACTC -0.25232053953  
ACTGACTG -0.609132553313  
ACTGAGAA 0.119356245495  
ACTGAGAC -0.641083577965  
ACTGAGAG -0.761046228758  
ACTGAGAT 2.49805944045  
ACTGAGCA -1.01989059149  
ACTGAGCC -1.22069543269  
ACTGAGCG -0.116525482834  
ACTGAGCT 0.567221321645  
ACTGAGGA -0.353383210034  
ACTGAGGC -1.16920116764  
ACTGAGGG -0.836968433419  
ACTGAGTA -0.0150090538828  
ACTGAGTC -0.431501804229  
ACTGAGTG -0.324037375728  
ACTGATAA 2.97316675183

ACTGATAC 1.98845760012  
ACTGATAG -0.482722141362  
ACTGATAT 4.81730773253  
ACTGATCA 0.237065002804  
ACTGATCC 0.830592813582  
ACTGATCG 1.87591348172  
ACTGATCT 1.12790392134  
ACTGATGA 0.577093965827  
ACTGATGC -0.106478497129  
ACTGATGG -0.0483647432205  
ACTGATTA 2.01074952935  
ACTGATTC 4.95901314983  
ACTGATTG 3.75837509513  
ACTGCAAA 1.71179276308  
ACTGCAAC 0.881859676639  
ACTGCAAG -0.321624823617  
ACTGCAAT 3.08461123787  
ACTGCACA 0.593255712538  
ACTGCACC -0.45790970942  
ACTGCACG 0.134212652527  
ACTGCACT -0.102905410741  
ACTGCAGA 1.95609672912  
ACTGCAGC 0.207235351168  
ACTGCAGG -0.918854059145  
ACTGCAGT 1.16155418773  
ACTGCATA 0.692305222006  
ACTGCATC 1.29476601014  
ACTGCATG 0.246124750229  
ACTGCCAA 0.128462518844  
ACTGCCAC -0.523354432891  
ACTGCCAG -0.800988211498  
ACTGCCAT -0.0801524043765  
ACTGCCCA -0.648361748446  
ACTGCCCC -0.464660673226  
ACTGCCCG -1.28293744749  
ACTGCCCT -0.45491349221  
ACTGCCGA -0.418119066623  
ACTGCCGC -0.484546846269  
ACTGCCGG -0.99061480745  
ACTGCCTA -0.201520504  
ACTGCCTC -1.55433492265  
ACTGCCTG 0.281483406721  
ACTGCGAA -0.414961054206  
ACTGCGAC -0.714137903779  
ACTGCGAG 0.215556172827  
ACTGCGAT 3.12272354945  
ACTGCGCA -0.00894081879968  
ACTGCGCC 0.0167307744416  
ACTGCGCG -0.363726079703  
ACTGCGCT 0.826975815086  
ACTGCGGA 0.105472962137  
ACTGCGGC -0.607362738541  
ACTGCGGG -0.748458091198  
ACTGCGTA 1.01065415011



ACTGCGTC -0.84759359521  
ACTGCGTG 0.100848337597  
ACTGCTAA 0.263054697445  
ACTGCTAC -0.136031084276  
ACTGCTAG -0.75775857107  
ACTGCTAT -0.120951718744  
ACTGCTCA -0.630838465012  
ACTGCTCC -0.950753591623  
ACTGCTCG -0.0287274054551  
ACTGCTCT -0.274526474218  
ACTGCTGA 0.393206264149  
ACTGCTGC -1.41031941482  
ACTGCTGG -0.733585478507  
ACTGCTTA -0.0935599732337  
ACTGCTTC 0.255455550367  
ACTGCTTG -0.621771921666  
ACTGGAAG 0.431511213966  
ACTGGAAC -0.560082206172  
ACTGGAAG 0.557100103567  
ACTGGAAT 2.43670063405  
ACTGGACA -0.656398186931  
ACTGGACC -0.560022088405  
ACTGGACG 0.211001859936  
ACTGGACT 0.0955830667702  
ACTGGAGA 0.061636916412  
ACTGGAGC -0.449439377489  
ACTGGAGG -0.932266071489  
ACTGGATA 2.71970423612  
ACTGGATC 0.518953289614  
ACTGGATG -0.180004616719  
ACTGGCAA 0.348283132375  
ACTGGCAC -1.41878295083  
ACTGGCAG -0.983721390675  
ACTGGCAT 0.52728665759  
ACTGGCCA -0.756681417522  
ACTGGCCC -0.68144795336  
ACTGGCCG -0.22917467663  
ACTGGCCT -0.893366217164  
ACTGGCGA 0.398224267988  
ACTGGCGC -0.166736887015  
ACTGGCGG -0.914932289711  
ACTGGCTA -1.08330803932  
ACTGGCTC -0.519574593663  
ACTGGCTG -0.611119053426  
ACTGGGAA 1.13442434658  
ACTGGGAC -0.820397885895  
ACTGGGAG -1.08895231346  
ACTGGGAT 1.92089803817  
ACTGGGCA -0.100864020493  
ACTGGGCC -1.22244146173  
ACTGGGCG -1.15892677995  
ACTGGGCT -1.2747533284  
ACTGGGGA -0.375140875289  
ACTGGGGC -0.612932518924

ACTGGGGG -1.28401407827  
ACTGGGTA 1.15447858799  
ACTGGGTC -0.798039304356  
ACTGGGTG -0.533960775207  
ACTGGTAA 1.92578953332  
ACTGGTAC -0.821373362003  
ACTGGTAG -0.259091891101  
ACTGGTAT 0.738497100037  
ACTGGTCA -0.0190006122027  
ACTGGTCC -0.462622942321  
ACTGGTCG -1.72126366375  
ACTGGTCT -0.677081573835  
ACTGGTGA -0.215124893197  
ACTGGTGC -0.428223033515  
ACTGGTGG -1.36763109568  
ACTGGTTA -0.705069269379  
ACTGGTTC -0.8908564311  
ACTGGTTG -0.875286190935  
ACTGTAAG 1.50421186544  
ACTGTAAC 0.0780234512945  
ACTGTAAG -0.147348384527  
ACTGTAAT 4.16525161664  
ACTGTACA -0.0153140862028  
ACTGTACC -0.349810123646  
ACTGTACG -0.787190399921  
ACTGTACT 0.0649407797585  
ACTGTAGA 1.05405682515  
ACTGTAGC 0.161155083078  
ACTGTAGG -0.179295227074  
ACTGTATA 0.639882529541  
ACTGTATC 1.40181431914  
ACTGTATG 0.564766687097  
ACTGTCAA 1.32483038244  
ACTGTCAC -0.0126589719724  
ACTGTCAG -0.410368840983  
ACTGTCAT -0.0648192373173  
ACTGTCCA -0.296334063358  
ACTGTCCC -0.361386453057  
ACTGTCCG -0.298063625364  
ACTGTCCT 0.531449420853  
ACTGTCGA -0.106653622797  
ACTGTCGC 0.72041419861  
ACTGTCGG -1.0221426553  
ACTGTCTA -0.588131065009  
ACTGTCTC -0.807283325804  
ACTGTCTG -0.869383410401  
ACTGTGAA 0.770083497366  
ACTGTGAC -0.774381133532  
ACTGTGAG -0.0789934383893  
ACTGTGAT 2.35888942461  
ACTGTGCA -0.307047572127  
ACTGTGCC -0.785965565772  
ACTGTGCG 0.155908108963  
ACTGTGCT -0.734913558385

ACTGTGGA -0.524009193784  
ACTGTGGC -0.303443642711  
ACTGTGGG -0.936664600951  
ACTGTGTA 0.248239327324  
ACTGTGTC -0.161845391867  
ACTGTGTG 0.546259563343  
ACTGTTAA -0.667286821368  
ACTGTTAC 1.5849027159  
ACTGTTAG -0.100865327401  
ACTGTTAT 1.76400425922  
ACTGTTCA -0.345028408768  
ACTGTTCC -0.263158204557  
ACTGTTCCG -0.353633090838  
ACTGTTCT 0.150162680148  
ACTGTTGA -0.262276825822  
ACTGTTGC -0.777589069834  
ACTGTTGG 0.485259633876  
ACTGTTTA 0.144002438744  
ACTGTTTC -0.116713677581  
ACTGTTTG -0.217262471872  
ACTTAAAA 2.40648910391  
ACTTAAAC 0.44488872394  
ACTTAAAG 0.585928140936  
ACTTAAAT 2.16387523124  
ACTTAAACA 1.05922956689  
ACTTAAACC 0.47234267827  
ACTTAAACG -0.134580939193  
ACTTAACT 0.473082649562  
ACTTAAAGA -0.123308335194  
ACTTAAAGC 0.0232527679717  
ACTTAAAGG -0.343844872911  
ACTTAAAGT 1.577647547  
ACTTAAATA 0.441787692711  
ACTTAAATC 1.30477300446  
ACTTAAATG 1.14802089433  
ACTTACAA 0.636841354697  
ACTTACAC 0.354793363733  
ACTTACAG -0.742265961239  
ACTTACAT 1.48651528601  
ACTTACCA 1.11356374295  
ACTTACCC 0.309041652306  
ACTTACCG -0.104700579527  
ACTTACCT -0.0781706091319  
ACTTACGA 0.344864522509  
ACTTACGC 0.304261244336  
ACTTACGG -0.423418055675  
ACTTACTA 0.811929122254  
ACTTACTC -0.0109231368075  
ACTTACTG 0.554805434555  
ACTTAGAA 1.58124206668  
ACTTAGAC -0.209391226554  
ACTTAGAG 0.00163102114571  
ACTTAGAT 2.84453564186  
ACTTAGCA 0.386637744695

ACTTAGCC -0.523048355045  
ACTTAGCG -0.519512123462  
ACTTAGCT -1.10543085466  
ACTTAGGA -0.0109231368075  
ACTTAGGC -0.340938309587  
ACTTAGGG 0.0492312232041  
ACTTAGTA 0.802072422349  
ACTTAGTC -0.656710537936  
ACTTAGTG 0.378023130124  
ACTTATAA -0.244903314041  
ACTTATAC 2.55029446093  
ACTTATAG 0.136981990514  
ACTTATAT 1.82665324516  
ACTTATCA 0.0894040058913  
ACTTATCC 0.749908497662  
ACTTATCG 0.558160528693  
ACTTATCT 1.91767990798  
ACTTATGA 0.943987990448  
ACTTATGC -0.447080931368  
ACTTATGG 0.402684483505  
ACTTATTA 1.82064878718  
ACTTATTC 0.624999461587  
ACTTATTG 0.0373872390414  
ACTTCAAA 0.623910545867  
ACTTCAAC -0.248252396403  
ACTTCAAG 0.15304598051  
ACTTCAAT 1.38761476405  
ACTTCACA 2.06154747383  
ACTTCACC -0.230755251129  
ACTTCACG -0.894293076296  
ACTTCACT -1.01142705548  
ACTTCAGA 0.735831530543  
ACTTCAGC -0.593744496119  
ACTTCAGG 0.873394049577  
ACTTCATA 0.478682750211  
ACTTCATC -1.02042903757  
ACTTCATG -0.455997964443  
ACTTCCAA 0.218656942675  
ACTTCCAC -0.687392032186  
ACTTCCAG -0.260052207077  
ACTTCCAT 0.573481672199  
ACTTCCCA -0.764034604521  
ACTTCCCC -0.922084474263  
ACTTCCCG -0.702758394708  
ACTTCCCT -0.419308875638  
ACTTCCGA -0.350667716656  
ACTTCCGC -0.213650962389  
ACTTCCGG 0.0659209607355  
ACTTCCTA 0.55325335065  
ACTTCCTC -0.449804527576  
ACTTCCTG -0.279014396185  
ACTTCGAA 1.30451449806  
ACTTCGAC -0.732354632581  
ACTTCGAG 0.257738979971

ACTTCGAT 1.43034438149  
ACTTCGCA -0.451763582622  
ACTTCGCC -0.359754125003  
ACTTCGCG -0.368915549868  
ACTTCGCT -0.188983597232  
ACTTCGGA -0.299360339451  
ACTTCGGC -0.0423495686009  
ACTTCGGG -0.689538497835  
ACTTCGTA 0.911320780228  
ACTTCGTC -0.170122301419  
ACTTCGTG 0.520876796763  
ACTTCTAA 0.644825778244  
ACTTCTAC -0.170701784412  
ACTTCTAG -0.398833809865  
ACTTCTAT 0.465373460833  
ACTTCTCA 1.10870282945  
ACTTCTCC -0.109177523467  
ACTTCTCG 0.363253763163  
ACTTCTCT 0.838895338529  
ACTTCTGA 1.2754350116  
ACTTCTGC -0.0774267171157  
ACTTCTGG -0.348463485675  
ACTTCTTA 0.914371626192  
ACTTCTTC -0.698438541106  
ACTTCTTG 0.0707565202219  
ACTTGAAA 1.36637149777  
ACTTGAAAC 1.46194541619  
ACTTGAAAG -0.520797075377  
ACTTGAAAT 0.856976671666  
ACTTGACA 0.128621700235  
ACTTGACC 0.357802388642  
ACTTGACG 0.0770511117653  
ACTTGACT -0.130331920003  
ACTTGAGA -0.268915656925  
ACTTGAGC -0.358557520066  
ACTTGAGG 0.655458258719  
ACTTGATA 1.79829125117  
ACTTGATC 0.765494682104  
ACTTGATG 0.086732686002  
ACTTGCAA 0.65646196404  
ACTTGCAC 0.246451999985  
ACTTGCAAG 0.413988191914  
ACTTGCAAT 1.39102474833  
ACTTGCCA 0.635413949812  
ACTTGCCC -0.595322718183  
ACTTGCCG -0.401042484333  
ACTTGCCCT 0.270430886024  
ACTTGCGA 0.152736243321  
ACTTGCGC 0.863585966649  
ACTTGCGG 0.0777537054896  
ACTTGCTA -0.353197106339  
ACTTGCTC -0.0624503359321  
ACTTGCTG 0.0571487330638  
ACTTGCAA 0.437533445889

ACTTGGAC 1.3995682671  
ACTTGGAG 0.176546538233  
ACTTGGAT 2.7768981882  
ACTTGGCA -0.453808109449  
ACTTGGCC -0.942464135755  
ACTTGGCG 1.50395884806  
ACTTGGCT -0.261577630058  
ACTTGGGA -0.159876665702  
ACTTGGGC -1.53234802573  
ACTTGGGG 0.863810493438  
ACTTGGTA -0.0226236224752  
ACTTGGTC -0.724306693306  
ACTTGGTG -1.13876484933  
ACTTGTA -0.155949407255  
ACTTGTAC -0.199799044823  
ACTTGTAG 0.0236341237171  
ACTTGTAT 0.834470148145  
ACTTGTCA 0.679536208383  
ACTTGTCC -0.791862857293  
ACTTGTCCG -0.673142291834  
ACTTGTCT -0.689547123428  
ACTTGTGA 0.493491324411  
ACTTGTGC -0.33872493025  
ACTTGTGG -0.625566136882  
ACTTGTTA 0.127411503455  
ACTTGTTTC -0.77227178407  
ACTTGTTG -0.0792527289304  
ACTTTAAA 1.51217145774  
ACTTTAAC 0.351730755598  
ACTTTAAG 0.136717472341  
ACTTTAAT 1.84091892979  
ACTTTACA 0.496623198669  
ACTTTACC 0.502765404743  
ACTTTACG 1.02386254619  
ACTTTACT 0.220546208835  
ACTTTAGA 0.173538036087  
ACTTTAGC -0.0193986963701  
ACTTTAGG -0.222002627076  
ACTTTATA 1.32036232548  
ACTTTATC 0.430111776913  
ACTTTATG 0.010995539509  
ACTTTCAA 0.467583442209  
ACTTTCAC 0.545839523122  
ACTTTCAG 0.164024791597  
ACTTTCAT 0.0345096890746  
ACTTTCCA 0.146919718713  
ACTTTCCC -0.088328159251  
ACTTTCCG 0.443809217958  
ACTTTCCCT -0.516469118946  
ACTTTCGA 0.351176103856  
ACTTTCGC 0.143219862252  
ACTTTCGG -0.449609275525  
ACTTTCTA 0.93459654978  
ACTTTCTC 0.0825646951063

ACTTTCTG -0.0798476334381  
ACTTTGAA 0.220901949185  
ACTTTGAC -0.900448090068  
ACTTTGAG -0.0138239497362  
ACTTTGAT 1.2825168845  
ACTTTGCA 0.41114880366  
ACTTTGCC -0.514235351845  
ACTTTGCG 0.89135985205  
ACTTTGCT -0.355443419757  
ACTTTGGA -0.265574938773  
ACTTTGGC -0.383442093328  
ACTTTGGG 0.316139992251  
ACTTTGTA 0.527677161691  
ACTTTGTC 0.302169668822  
ACTTTGTG -0.345315928521  
ACTTTTAA 0.454495804423  
ACTTTTAC 0.633847228539  
ACTTTTAG -0.365890319301  
ACTTTTAT 1.22853635774  
ACTTTTCA 0.431522453375  
ACTTTTCC 0.270580919059  
ACTTTTCG 2.19025177064  
ACTTTTCT -0.0229111422285  
ACTTTTGA 0.0761945642822  
ACTTTTGC 0.294595614377  
ACTTTTGG -0.114285181193  
ACTTTTTA 1.05384301501  
ACTTTTTC 1.22374680141  
ACTTTTTG -0.209829563487  
AGAAAAAA 0.920315705018  
AGAAAAAC -0.573143444417  
AGAAAAAG 0.102738910665  
AGAAAAAT 2.09172920647  
AGAAAACA 0.352682184599  
AGAAAACC 0.69037570308  
AGAAAACG 0.610474486416  
AGAAAACT -0.309516059899  
AGAAAAGA 2.35137679484  
AGAAAAGC 1.12400881283  
AGAAAAGG -0.249751681226  
AGAAAATA 2.05148062312  
AGAAAATC 21.724022307  
AGAAAATG 1.37182522473  
AGAAACAA 0.615062778914  
AGAAACAC 0.612983749717  
AGAAACAG 0.831968203529  
AGAAACAT 1.10245580936  
AGAAACCA 0.974115878483  
AGAAACCC -0.0219591904636  
AGAAACCG -0.373910552127  
AGAAACCT 0.171487758865  
AGAAACGA 0.397539970975  
AGAAACGC 0.0201671582561  
AGAAACGG -0.246705017368

AGAAACTA 1.77628553478  
AGAAACTC -0.390780120195  
AGAAACTG 0.0202126386534  
AGAAAGAA 1.46759648625  
AGAAAGAC -0.731345699629  
AGAAAGAG 0.228960343723  
AGAAAGAT 2.186381232  
AGAAAGCA -0.277786686839  
AGAAAGCC -0.298147528856  
AGAAAGCG -0.242421495807  
AGAAAGCT 0.0806788269066  
AGAAAGGA 0.625450606218  
AGAAAGGC -0.596900417483  
AGAAAGGG -0.488851278357  
AGAAAGTA 2.62163882835  
AGAAAGTC 0.746513673521  
AGAAAGTG 0.0451505337607  
AGAAATAA 2.37995442864  
AGAAATAC 2.11990718781  
AGAAATAG 1.8652347367  
AGAAATAT 4.45356753822  
AGAAATCA 4.66044584213  
AGAAATCC 14.6315114334  
AGAAATCG 3.33572314891  
AGAAATCT 15.7564280245  
AGAAATGA 0.52230786099  
AGAAATGC 1.17246869895  
AGAAATGG 0.568465498032  
AGAAATTA 2.50843419867  
AGAAATTC 2.71932549419  
AGAAATTG 1.01860067332  
AGAACAAA 0.816207416182  
AGAACAAC -0.253392726828  
AGAACAAG 0.146047488334  
AGAACAAT 1.88223917767  
AGAACACA 0.920200697116  
AGAACACC 0.273087829926  
AGAACACG 0.0674944779305  
AGAACACT 0.063836703906  
AGAACAGA -0.053085033424  
AGAACAGC -0.799037520663  
AGAACAGG -1.19688670606  
AGAACATA 0.845044601907  
AGAACATC 1.43478786859  
AGAACATG 1.03285747098  
AGAACCAA 0.595248224428  
AGAACCAC 0.533786695066  
AGAACCAG -0.346572389843  
AGAACCAT -0.648430753187  
AGAACCCA -0.0938945416739  
AGAACCCC -0.556543622154  
AGAACCCG -0.976140017545  
AGAACCCT -0.665349722376  
AGAACCGA 1.68401443419



AGAACCGC -0.817147344394  
AGAACCGG -0.326683341603  
AGAACCTA 0.392769495505  
AGAACCTC -0.425320652297  
AGAACCTG -1.08728888099  
AGAACGAA -0.218726731561  
AGAACGAC -0.742400311378  
AGAACGAG -0.50728782908  
AGAACGAT 0.321831315076  
AGAACGCA -0.702872357083  
AGAACGCC -0.767031605876  
AGAACGCG -0.348023841834  
AGAACGCT -0.845525021276  
AGAACGGA 0.941286873057  
AGAACGGC -0.816032290514  
AGAACGGG -0.694858397415  
AGAACGTA -0.00455771085219  
AGAACGTC -0.179253144637  
AGAACGTG 0.0886716146653  
AGAATAA 0.687250101981  
AGAATAAC -0.109410675849  
AGAATAG 0.213961745104  
AGAATAT 0.323934652762  
AGAATCA 1.00276643775  
AGAATCC -0.605666633378  
AGAATCG -0.418625624152  
AGAATCT -0.282614666259  
AGAATGA 0.430057932304  
AGAATGC -0.226828515444  
AGAATGG 0.0512982288484  
AGAATTA 0.407008257831  
AGAATTC -0.386801108191  
AGAATTG -0.0875293771001  
AGAAGAAA 0.0583670326728  
AGAAGAAC -0.795694188696  
AGAAGAAG -1.11280024732  
AGAAGAAT 2.18859016785  
AGAAGACA -0.0696838101607  
AGAAGACC -1.31056783439  
AGAAGACG -0.381282035837  
AGAAGACT -0.163721066185  
AGAAGAGA 0.360791809931  
AGAAGAGC -0.777530520357  
AGAAGAGG -0.95562208519  
AGAAGATA 2.85431262038  
AGAAGATC 8.49870699379  
AGAAGATG 0.188868066567  
AGAAGCAA 0.00381094363852  
AGAAGCAC -0.31832096027  
AGAAGCAG -0.673137586965  
AGAAGCAT 0.397087780818  
AGAAGCCA -0.354082144416  
AGAAGCCC -1.55217486515  
AGAAGCCG -0.790550721692

AGAAGCCT -1.15788909502  
AGAAGCGA 0.473561239261  
AGAAGCGC -1.04075825242  
AGAAGCGG -0.83586644862  
AGAAGCTA -0.319786526867  
AGAAGCTC -0.544508045283  
AGAAGCTG -0.564823145521  
AGAAGGAA 0.0335331674399  
AGAAGGAC -1.11263975902  
AGAAGGAG -0.754710077541  
AGAAGGAT 1.22494445188  
AGAAGGCA 0.213545102844  
AGAAGGCC -1.02946238546  
AGAAGGCG -0.720901413901  
AGAAGGCT -1.44163449806  
AGAAGGGA -0.757083422413  
AGAAGGGC -1.49933343938  
AGAAGGGG -0.945917509373  
AGAAGGTA -0.272543110684  
AGAAGGTC -0.779201794268  
AGAAGGTG -1.20516622943  
AGAAGTAA 1.06810033542  
AGAAGTAC -0.465998946987  
AGAAGTAG -0.771810706938  
AGAAGTAT 3.22631064339  
AGAAGTCA -0.813780226701  
AGAAGTCC -0.0738970200722  
AGAAGTCG 0.501886117061  
AGAAGTCT -0.00199172774524  
AGAAGTGA -0.0683170458064  
AGAAGTGC -0.675679784347  
AGAAGTGG -0.662616977812  
AGAAGTTA 0.76471994706  
AGAAGTTC 1.42348128498  
AGAAGTTG -0.394504807907  
AGAATAAA 1.36695777669  
AGAATAAC 1.26308342438  
AGAATAAG 1.76339001247  
AGAATAAT 2.43186925667  
AGAATACA 1.12880072159  
AGAATACC 0.26288819737  
AGAATACG 2.0240052355  
AGAATACT 1.43835259076  
AGAATAGA -0.336749408164  
AGAATAGC -0.557413500098  
AGAATAGG 0.576737964096  
AGAATATA 2.91298442399  
AGAATATC 10.0135126552  
AGAATATG 3.43094080421  
AGAATCAA 4.99808708429  
AGAATCAC 5.49705670553  
AGAATCAG 5.90919745234  
AGAATCAT 6.55147423728  
AGAATCCA 10.5677697112

AGAATCCC 9.09626922947  
AGAATCCG 18.6284168366  
AGAATCCT 12.6952112235  
AGAATCGA 5.12249766567  
AGAATCGC 8.23077204061  
AGAATCGG 6.91112746899  
AGAATCTA 16.4513436645  
AGAATCTC 15.5694241315  
AGAATCTG 21.6105063719  
AGAATGAA 0.0104646734919  
AGAATGAC 0.268840901789  
AGAATGAG -0.338394543916  
AGAATGAT 1.14086766425  
AGAATGCA 0.813898371182  
AGAATGCC -0.546124951822  
AGAATGCG 2.36079489643  
AGAATGCT -1.15079101646  
AGAATGGA -0.0271392508908  
AGAATGGC -0.137110328877  
AGAATGGG -0.288608930351  
AGAATGTA 0.766117293061  
AGAATGTC -0.405924831125  
AGAATGTG 1.50977223609  
AGAATTAA 1.13546542947  
AGAATTAC 2.53318808114  
AGAATTAG 0.729000583969  
AGAATTAT 3.04021714244  
AGAATTCA 1.00908716745  
AGAATTCC 2.44580560049  
AGAATTCG 2.59825693787  
AGAATTCT 3.49478717923  
AGAATTGA 0.246385870442  
AGAATTGC 1.77688540554  
AGAATTGG 1.00064009848  
AGAATTTA 2.1943408243  
AGAATTTT 3.83804681875  
AGAATTTG 5.18581552711  
AGACAAAA -0.201520504  
AGACAAAC -0.264346706664  
AGACAAAG -0.632749425845  
AGACAAAT 1.40145021458  
AGACAACA -0.559938446295  
AGACAACC -0.610751028142  
AGACAACG -0.406573318859  
AGACAACT -0.326721764697  
AGACAAGA -0.135769179919  
AGACAAGC -0.905505301146  
AGACAAGG -0.503941099152  
AGACAATA 2.00933493216  
AGACAATC 3.96618626995  
AGACAATG -1.06909463101  
AGACACAA -0.226769443204  
AGACACAC 0.1157491795  
AGACACAG -0.0726165116439

AGACACAT 0.152539684363  
AGACACCA -0.604189565991  
AGACACCC -0.74821579046  
AGACACCG -0.587244458643  
AGACACCT -1.20464608006  
AGACACGA 1.35877548728  
AGACACGC 0.0383797049533  
AGACACGG 1.10460645711  
AGACACTA -1.01199373078  
AGACACTC -1.18081957949  
AGACACTG -0.00752099398182  
AGACAGAA -0.256632290303  
AGACAGAC 0.33070234499  
AGACAGAG -0.0157796068215  
AGACAGAT 1.97529154785  
AGACAGCA -0.800308619354  
AGACAGCC -0.802088366626  
AGACAGCG -0.498400332125  
AGACAGCT -0.184667664354  
AGACAGGA -0.862525802904  
AGACAGGC -0.529850288262  
AGACAGGG -0.812917144679  
AGACAGTA 0.141561918802  
AGACAGTC -0.755858065501  
AGACAGTG -1.30904188865  
AGACATAA -0.0692896467172  
AGACATAC -0.0947056087596  
AGACATAG 0.123219465453  
AGACATAT 1.63006710289  
AGACATCA 1.62811353686  
AGACATCC 0.544095585128  
AGACATCG 0.486666389614  
AGACATCT 0.501390014796  
AGACATGA 0.236807541934  
AGACATGC 0.712551578885  
AGACATGG -0.441798147974  
AGACATTA 1.12691537615  
AGACATTC 0.574298751062  
AGACATTG -0.593378823269  
AGACCAAA 0.150475292534  
AGACCAAC -0.834774657702  
AGACCAAG -1.48049723619  
AGACCAAT -0.173708456886  
AGACCACA 0.34668347702  
AGACCACC -0.791226915875  
AGACCACG -0.244875346211  
AGACCACT -0.946427203481  
AGACCAGA -1.02467936367  
AGACCAGC -0.64208806743  
AGACCAGG -1.11069142062  
AGACCATA -0.139436625062  
AGACCATC -0.947303093203  
AGACCATG -0.685615944256  
AGACCCAA -1.02366023684

AGACCCAC -1.29402603884  
AGACCCAG -0.128091095599  
AGACCCAT -0.30110662988  
AGACCCCA -1.05772217924  
AGACCCCC -1.48100117991  
AGACCCCG -0.722308953784  
AGACCCCT -0.703057415251  
AGACCCGA -0.460498955489  
AGACCCGC -1.0820685678  
AGACCCGG -1.34377741142  
AGACCCTA -0.213180214139  
AGACCCTC -1.66383185442  
AGACCCTG -0.965381028379  
AGACCGAA -0.177830444622  
AGACCGAC -0.898725062601  
AGACCGAG 0.215414504003  
AGACCGAT 0.442251383658  
AGACCGCA -0.443663367028  
AGACCGCC -1.10786118072  
AGACCGCG 0.19195655148  
AGACCGCT -0.42619523511  
AGACCGGA -0.0154894732523  
AGACCGGC -0.364910661087  
AGACCGGG -1.18700961839  
AGACCGTA 0.51075949941  
AGACCGTC -0.958728605433  
AGACCGTG -0.983834046142  
AGACCTAA 0.436438257011  
AGACCTAC -0.890910798471  
AGACCTAG -0.367997839092  
AGACCTAT -0.357591453695  
AGACCTCA -1.10709167331  
AGACCTCC -1.12695327648  
AGACCTCG -0.955460812747  
AGACCTCT -1.21227633155  
AGACCTGA -0.373076222079  
AGACCTGC -0.747291545144  
AGACCTGG -0.503506682943  
AGACCTTA -0.972815243672  
AGACCTTC -0.788653614083  
AGACCTTG -1.06114131187  
AGACGAAA 2.38769968803  
AGACGAAC 0.65160941475  
AGACGAAG 0.155210481489  
AGACGAAT 0.937648964033  
AGACGACA -0.674463314409  
AGACGACC -0.917057060687  
AGACGACG -0.691964380408  
AGACGACT -0.469463821395  
AGACGAGA 0.875076824278  
AGACGAGC -1.21152329117  
AGACGAGG -0.913318258368  
AGACGATA 0.641926010842  
AGACGATC 2.62738321164

AGACGATG -0.366079036811  
AGACGCAA 0.856268327547  
AGACGCAC -0.997684656801  
AGACGCAG -0.675214002347  
AGACGCAT -0.159667037664  
AGACGCCA -1.20049220377  
AGACGCCC -1.44767973156  
AGACGCCG -1.00817965056  
AGACGCCT -0.879628000591  
AGACGCGA 0.692926526055  
AGACGCGC -0.277942208887  
AGACGCGG -0.881482241617  
AGACGCTA -0.391234140023  
AGACGCTC -0.306445871698  
AGACGCTG -0.516529498094  
AGACGGAA -0.650774300557  
AGACGGAC -0.896245858184  
AGACGGAG -0.431238592964  
AGACGGAT 2.9522878515  
AGACGGCA -0.918142578446  
AGACGGCC -0.521089299999  
AGACGGCG -0.701630794512  
AGACGGCT -0.94432621823  
AGACGGGA -1.11860474837  
AGACGGGC -0.69114965398  
AGACGGGG -1.26235913598  
AGACGGTA -0.520926982029  
AGACGGTC -0.948957900073  
AGACGGTG -0.397053278447  
AGACGTAA -0.169508316055  
AGACGTAC -0.407167439222  
AGACGTAG 0.0242661444111  
AGACGTAT 0.496950709806  
AGACGTCA 0.467528552074  
AGACGTCC -0.862660153043  
AGACGTCCG 0.446102580062  
AGACGTCT 1.33998999212  
AGACGTGA -0.277250070427  
AGACGTGC -0.48884683487  
AGACGTGG -1.04010584396  
AGACGTTA -0.528128829085  
AGACGTTC -1.15989441461  
AGACGTTG -0.340435411401  
AGACTAAA 0.244585735405  
AGACTAAC -0.880827219343  
AGACTAAG 1.0182004981  
AGACTAAT 0.438529832525  
AGACTACA -0.73959464135  
AGACTACC 0.256994042428  
AGACTACG 0.00668797084217  
AGACTACT 0.70794080757  
AGACTAGA 1.67750995323  
AGACTAGC -0.539979870551  
AGACTAGG -0.732187871124

AGACTATA 0.98998174123  
AGACTATC 0.0418869231797  
AGACTATG 0.17149350926  
AGACTCAA -0.157160910942  
AGACTCAC -1.18501370854  
AGACTCAG -0.469075408347  
AGACTCAT -0.429974028813  
AGACTCCA -0.816474025408  
AGACTCCC -1.07632209346  
AGACTCCG -0.0799359804168  
AGACTCCT -0.58958094871  
AGACTCGA -0.298526793549  
AGACTCGC -0.408958164521  
AGACTCGG -0.48721685925  
AGACTCTA -0.94718468734  
AGACTCTC -0.574220859347  
AGACTCTG -0.415818385834  
AGACTGAA 1.45101652899  
AGACTGAC -1.22449017066  
AGACTGAG -0.147371124726  
AGACTGAT 0.957141757777  
AGACTGCA 0.186730749274  
AGACTGCC -0.351849422841  
AGACTGCG 0.159633842202  
AGACTGCT -0.570226948593  
AGACTGGA -0.945988082404  
AGACTGGC -0.94483957168  
AGACTGGG -0.969750544483  
AGACTGTA -0.467387406014  
AGACTGTC -0.244681923831  
AGACTGTG -0.564362329771  
AGACTTAA 0.964107577254  
AGACTTAC 0.737984792113  
AGACTTAG 0.215980656535  
AGACTTAT -0.426731590141  
AGACTTCA -1.08794782399  
AGACTTCC -1.12103219923  
AGACTTCG -0.395622998366  
AGACTTGA -0.346521943195  
AGACTTGC -0.800615481345  
AGACTTGG -0.704522197703  
AGACTTTA 0.395855105221  
AGACTTTC -0.677855001971  
AGACTTTG 0.233481199771  
AGAGAAAA 1.65009259232  
AGAGAAAC -0.246705017368  
AGAGAAAG 0.227199677307  
AGAGAAAT 2.01413546652  
AGAGAACA 0.135522697076  
AGAGAACC 0.524658204282  
AGAGAACG -0.8223830791  
AGAGAACT 1.0145168473  
AGAGAAGA -0.0821856917952  
AGAGAAGC 0.158849958802

AGAGAAGG -0.746127874288  
AGAGAATA 1.98932669392  
AGAGAATC 18.6044125965  
AGAGAATG 1.02674819899  
AGAGACAA -0.128788984455  
AGAGACAC -0.789335035899  
AGAGACAG 0.040929743783  
AGAGACAT 0.427988312844  
AGAGACCA -1.02753234377  
AGAGACCC -1.0117448955  
AGAGACCG -0.456623189215  
AGAGACCT -0.188083399022  
AGAGACGA -0.703443737247  
AGAGACGC -0.828059503174  
AGAGACGG -0.760423617801  
AGAGACTA 0.14362631063  
AGAGACTC -0.237155179454  
AGAGACTG 0.0313691892243  
AGAGAGAA 0.444361778647  
AGAGAGAC -0.484743143846  
AGAGAGAG -0.54361046089  
AGAGAGAT 1.36936640808  
AGAGAGCA -0.13560372537  
AGAGAGCC -1.29033402383  
AGAGAGCG -0.501722492183  
AGAGAGCT -0.143629708591  
AGAGAGGA 0.534877701839  
AGAGAGGC -1.13294597228  
AGAGAGGG -1.4241143512  
AGAGAGTA -0.704030800307  
AGAGAGTC -0.84974685678  
AGAGAGTG -0.494246194454  
AGAGATAA 1.50350221442  
AGAGATAC 3.37781760907  
AGAGATAG 1.00841959886  
AGAGATAT 5.55140133686  
AGAGATCA 1.2754350116  
AGAGATCC 6.47636100865  
AGAGATCG 4.04984510841  
AGAGATCT 8.57406487559  
AGAGATGA 0.424482662907  
AGAGATGC -0.204107659016  
AGAGATGG -0.848071923527  
AGAGATTA 2.73426109985  
AGAGATTC 14.923611115  
AGAGATTG 3.12559482626  
AGAGCAAA -0.0810298623871  
AGAGCAAC -0.39421990197  
AGAGCAAG -0.263020456457  
AGAGCAAT 1.46397530565  
AGAGCACA 0.37745174996  
AGAGCACC -1.03322523488  
AGAGCACG -0.132124997737  
AGAGCACT -0.0272014597101



AGAGCAGA -0.553043722612  
AGAGCAGC -0.556950331914  
AGAGCAGG -0.973780525898  
AGAGCATA 0.844005871453  
AGAGCATC 0.317442456733  
AGAGCATG -0.788137646817  
AGAGCCAA -0.38442959299  
AGAGCCAC -1.12756726184  
AGAGCCAG -0.394989932145  
AGAGCCAT 0.138591316988  
AGAGCCCA -1.59123311672  
AGAGCCCC -1.70670680002  
AGAGCCCG -1.09082537396  
AGAGCCCT -1.57318210385  
AGAGCCGA -0.763914630369  
AGAGCCGC -1.26082796261  
AGAGCCGG -1.27379771729  
AGAGCCTA -0.100009825444  
AGAGCCTC -1.16468083436  
AGAGCCTG -1.46904244923  
AGAGCGAA -0.808725629439  
AGAGCGAC 0.00893088629911  
AGAGCGAG -0.536005563416  
AGAGCGAT 0.844321097655  
AGAGCGCA 0.331185116794  
AGAGCGCC -0.952356644938  
AGAGCGCG 0.375075791272  
AGAGCGCT -0.445889292681  
AGAGCGGA -0.369580504643  
AGAGCGGC -1.31383092221  
AGAGCGGG -0.811025264702  
AGAGCGTA -0.481697002751  
AGAGCGTC -1.38616252792  
AGAGCGTG -0.259890673252  
AGAGCTAA 0.501562526648  
AGAGCTAC -0.387538988431  
AGAGCTAG -0.145410762772  
AGAGCTAT -0.28795939709  
AGAGCTCA -0.90133887854  
AGAGCTCC -1.27452278984  
AGAGCTCG -0.0485929293519  
AGAGCTCT -1.04824578955  
AGAGCTGA -0.0543158793495  
AGAGCTGC -0.748386734022  
AGAGCTGG -0.537286071844  
AGAGCTTA -0.581682781088  
AGAGCTTC -1.65490488884  
AGAGCTTG -1.03858617137  
AGAGGAAA -0.0674563162178  
AGAGGAAC -1.61377623367  
AGAGGAAG -0.66930102793  
AGAGGAAT 1.25700604094  
AGAGGACA 0.522024523342  
AGAGGACC -0.808229004411

AGAGGACG 0.187005461329  
AGAGGACT -0.667633936125  
AGAGGAGA 0.0496423764513  
AGAGGAGC -0.734812142327  
AGAGGAGG -1.26902698044  
AGAGGATA 2.25039515263  
AGAGGATC 5.55110022526  
AGAGGATG 0.545657078769  
AGAGGCAA 0.324841385511  
AGAGGCAC -1.35728169147  
AGAGGCAG -1.16095457836  
AGAGGCAT 0.251151118279  
AGAGGCCA -0.838589522065  
AGAGGCCC -0.173021284676  
AGAGGCCG -0.719092914653  
AGAGGCCT -1.53936716705  
AGAGGCCG -0.766096382533  
AGAGGCCG -1.18037261696  
AGAGGCCG -0.787648863237  
AGAGGCTA -0.217451189383  
AGAGGCTC -1.65465579219  
AGAGGCTG -1.43787949008  
AGAGGGAA -0.0228860495955  
AGAGGGAC -0.87415545416  
AGAGGGAG -0.746595224578  
AGAGGGAT 1.06348877996  
AGAGGGCA -0.602602456953  
AGAGGGCC -0.852014342107  
AGAGGGCG -0.968892690092  
AGAGGGCT -1.11090679905  
AGAGGGGA -0.316734896759  
AGAGGGGC -0.998548261587  
AGAGGGGG -0.511211689567  
AGAGGGTA 0.498153587901  
AGAGGGTC -1.87981852273  
AGAGGGTG -1.23133575461  
AGAGGTAA 0.948025290546  
AGAGGTAC -0.39616327412  
AGAGGTAG -0.0463926190948  
AGAGGTAT -0.20980055013  
AGAGGTCA -0.992066520823  
AGAGGTCC -0.699047298838  
AGAGGTCC -0.0348727481084  
AGAGGTGA 1.44375639384  
AGAGGTGC -0.434284734059  
AGAGGTGG -1.14846419751  
AGAGGTTA -0.483738131618  
AGAGGTTC -0.692509883794  
AGAGGTTG -0.892530318827  
AGAGTAAA 0.845930162747  
AGAGTAAC -0.817074157547  
AGAGTAAG 1.16046893135  
AGAGTAAT 1.67179510606  
AGAGTACA 0.861362654811

AGAGTACC -0.637531140723  
AGAGTACG -0.276635300918  
AGAGTACT -0.236036988996  
AGAGTAGA -0.107068696768  
AGAGTAGC -0.885608934221  
AGAGTAGG -0.80551481794  
AGAGTATA 2.49319042412  
AGAGTATC 6.83368689865  
AGAGTATG -0.0708422533847  
AGAGTCAA -0.102089377405  
AGAGTCAC -0.892655781992  
AGAGTCAG -0.0425103182811  
AGAGTCAT 0.582130004996  
AGAGTCCA -0.652542024277  
AGAGTCCC -1.07091358552  
AGAGTCCG -1.76522804784  
AGAGTCCT -1.30874312949  
AGAGTCGA -0.410522010597  
AGAGTCGC -0.952672655285  
AGAGTCGG -0.959203013026  
AGAGTCTA -0.441438748283  
AGAGTCTC 0.122476618963  
AGAGTCTG -0.578050883842  
AGAGTGAA -0.617791602754  
AGAGTGAC -0.45790970942  
AGAGTGAG 0.136996627883  
AGAGTGAT 1.5063525807  
AGAGTGCA 0.530493809746  
AGAGTGCC -0.0180497059642  
AGAGTGCG -0.466701540711  
AGAGTGCT -0.0546935757527  
AGAGTGGA 0.50837517651  
AGAGTGGC -1.30106138582  
AGAGTGGG -0.556543622154  
AGAGTGTA 0.808253574281  
AGAGTGTC -0.378730951481  
AGAGTGTG -0.0842919046785  
AGAGTTAA 0.524919063112  
AGAGTTAC 0.423885667347  
AGAGTTAG 1.4146708956  
AGAGTTAT 0.263270598642  
AGAGTTCA 0.547621622829  
AGAGTTCC -0.717078969473  
AGAGTTCG -0.728473115912  
AGAGTTGA -0.993963105668  
AGAGTTGC -0.554418067033  
AGAGTTGG -0.592691651059  
AGAGTTTA 0.243489501  
AGAGTTTC -0.365031680765  
AGAGTTTG 0.225588521163  
AGATAAAA 1.38862840187  
AGATAAAC 0.356032051106  
AGATAAAG -0.249435409497  
AGATAAAT 0.596610806677

AGATAACA 1.38876301339  
AGATAACC 1.71231996975  
AGATAACG 2.16225518813  
AGATAACT 1.18698191195  
AGATAAGA 0.241016831122  
AGATAAGC 1.30579134715  
AGATAAGG -0.111618827554  
AGATAATA 1.4216079631  
AGATAATC 6.12385081314  
AGATAATG -0.17905684706  
AGATACAA 0.416049969926  
AGATACAC 2.96030808432  
AGATACAG 3.08317938949  
AGATACAT 2.31713894262  
AGATACCA 2.19115824201  
AGATACCC 5.16357822663  
AGATACCG 4.38881861255  
AGATACCT 2.36194366853  
AGATACGA 4.60672748111  
AGATACGC 12.9061087921  
AGATACGG 6.99571943974  
AGATACTA 1.97068861798  
AGATACTC 6.35873929141  
AGATACTG 4.99153712293  
AGATAGAA 1.25825283114  
AGATAGAC -0.54517509111  
AGATAGAG 0.0216612154466  
AGATAGAT 3.52629751452  
AGATAGCA 1.53162818082  
AGATAGCC 0.953058454518  
AGATAGCG 2.57911491823  
AGATAGCT 0.651024181361  
AGATAGGA 1.00323404942  
AGATAGGC 0.438557800355  
AGATAGGG 0.255612902087  
AGATAGTA 0.915893651213  
AGATAGTC -0.257725388128  
AGATAGTG 1.67331739246  
AGATATAA 2.43626987718  
AGATATAC 3.17302669857  
AGATATAG 1.49138587063  
AGATATAT 5.29153601762  
AGATATCA 9.55754762487  
AGATATCC 23.3788921708  
AGATATCG 14.5716751748  
AGATATCT 22.7796390575  
AGATATGA 5.92285620891  
AGATATGC 7.92839274375  
AGATATGG 5.62215524326  
AGATATTA 6.18839847498  
AGATATTC 14.0135564672  
AGATATTG 8.33720087524  
AGATCAAA 0.935050569609  
AGATCAAC 1.42182700087

AGATCAAG 1.89763638322  
AGATCAAT 1.40810995621  
AGATCACA 2.31500136395  
AGATCACC 4.60095852795  
AGATCACG 4.44538524881  
AGATCACT 1.92093489297  
AGATCAGA 4.4326742619  
AGATCAGC 1.27697088984  
AGATCAGG 1.76540029831  
AGATCATA 1.96408402787  
AGATCATC 1.50457048099  
AGATCATG 2.11059102505  
AGATCCAA 2.16795748898  
AGATCCAC 3.14066112271  
AGATCCAG 2.48258957081  
AGATCCAT 3.06501336872  
AGATCCCA 2.47071631191  
AGATCCCC 6.74679790645  
AGATCCCG 5.25824593506  
AGATCCCT 4.53846663234  
AGATCCGA 4.27918602373  
AGATCCGC 6.92080642941  
AGATCCGG 3.84060286936  
AGATCCTA 4.55119016557  
AGATCCTC 7.21539707754  
AGATCCTG 7.23920162205  
AGATCGAA 2.49431384221  
AGATCGAC 1.65797115632  
AGATCGAG 0.266257928878  
AGATCGAT 1.49483689182  
AGATCGCA 9.29395683378  
AGATCGCC 5.78684943312  
AGATCGCG 16.8269137284  
AGATCGCT 5.29657597751  
AGATCGGA 3.62812864691  
AGATCGGC 0.750947228116  
AGATCGGG 3.05569067141  
AGATCGTA 3.45943636419  
AGATCGTC 3.20748986172  
AGATCGTG 5.21418902189  
AGATCTAA 3.21964306031  
AGATCTAC 6.93491476232  
AGATCTAG 5.36796164323  
AGATCTAT 4.94317708458  
AGATCTCA 8.55395600543  
AGATCTCC 12.1177589035  
AGATCTCG 9.56233404462  
AGATCTGA 4.00222739378  
AGATCTGC 7.44746315736  
AGATCTGG 4.40448582529  
AGATCTTA 5.21911136006  
AGATCTTC 9.689346157  
AGATCTTG 6.05204014095  
AGATGAAA -0.29731999473

AGATGAAC 1.30360724255  
AGATGAAG -0.463731200279  
AGATGAAT 0.47404662488  
AGATGACA 0.645947366664  
AGATGACC 0.191728888112  
AGATGACG 0.16640153443  
AGATGACT 0.11077195119  
AGATGAGA 0.815805934054  
AGATGAGC -0.705211199585  
AGATGAGG -0.772383132629  
AGATGATA 1.18719467656  
AGATGATC 1.50643517728  
AGATGATG 0.245686674678  
AGATGCAA 1.02853657185  
AGATGCAC -0.234312393239  
AGATGCAG -0.687055111312  
AGATGCAT -0.100972755236  
AGATGCCA 0.471080727935  
AGATGCCC 0.0938934961475  
AGATGCCG -0.160913566485  
AGATGCCT -0.702211584414  
AGATGCGA 0.21547462177  
AGATGCGC -0.000698150237208  
AGATGCGG 0.562450323412  
AGATGCTA 0.427647732627  
AGATGCTC 1.89125030812  
AGATGCTG 1.37134585089  
AGATGGAA -0.528165161127  
AGATGGAC -1.27974362579  
AGATGGAG -1.0927943615  
AGATGGAT 1.30545390351  
AGATGGCA -0.540948812119  
AGATGGCC -0.898966579194  
AGATGGCG 0.159178254083  
AGATGGCT -0.251886646084  
AGATGGGA 0.302334077845  
AGATGGGC -1.26287405772  
AGATGGGG -0.562342372814  
AGATGGTA 0.761029238954  
AGATGGTC -0.0975073580642  
AGATGGTG -0.63378841768  
AGATGTAA 0.966799023526  
AGATGTAC 0.395026002805  
AGATGTAG 0.706825230927  
AGATGTAT 1.14277444298  
AGATGTCA 1.19118126863  
AGATGTCC 0.347290927844  
AGATGTCCG 0.905888486563  
AGATGTGA 0.0541804836839  
AGATGTGC 1.30028246867  
AGATGTGG -0.0622783468434  
AGATGTTA 1.56347909633  
AGATGTTC 0.421904394865  
AGATGTTG 1.54178076469

AGATTAAG 1.68610078207  
AGATTAAT 2.07086050002  
AGATTACA 25.9009346794  
AGATTACC 11.5597102461  
AGATTACG 22.0894588679  
AGATTACT 10.3806048071  
AGATTAGA 2.55750414943  
AGATTAGC 0.95250615521  
AGATTAGG 1.36626616099  
AGATTATA 5.60571460239  
AGATTATC 9.27114266412  
AGATTATG 6.3371131011  
AGATTCAA 2.85284470135  
AGATTCAC 5.01866617994  
AGATTCAG 3.01485476362  
AGATTCAT 2.44557872127  
AGATTCCA 11.2937623158  
AGATTCCC 37.1991070254  
AGATTCCG 17.1139839053  
AGATTCCT 13.6638684087  
AGATTCGA 6.8938945805  
AGATTCGC 29.7793132008  
AGATTCGG 9.63864623062  
AGATTCTA 14.1926284744  
AGATTCTC 29.3557678523  
AGATTCTG 15.4424052232  
AGATTGAA 0.818067930367  
AGATTGAC 0.177453532363  
AGATTGAG 1.15569087582  
AGATTGAT 0.862405828753  
AGATTGCA 16.8468333583  
AGATTGCC 12.1994061492  
AGATTGCG 32.8331383918  
AGATTGCT 10.566943484  
AGATTGGA 1.82176305692  
AGATTGGC 2.23995766282  
AGATTGGG 1.69167788114  
AGATTGTA 4.08370212764  
AGATTGTC 7.6795530229  
AGATTGTG 7.02494007226  
AGATTTAA 3.80202686683  
AGATTTAC 5.70027436022  
AGATTTAG 3.27177614197  
AGATTTAT 3.70378293543  
AGATTTCA 21.5380344043  
AGATTTCC 37.2518987887  
AGATTTCG 28.3656596024  
AGATTTGA 7.61999984056  
AGATTTGC 15.7091545495  
AGATTTGG 10.0350541579  
AGATTTTA 8.27867439979  
AGATTTTC 24.2307421038

AGATTTTG 17.8285509976  
AGCAAAAA -0.0747018139997  
AGCAAAAC -0.382267444446  
AGCAAAAG -0.14109744371  
AGCAAAAT 1.79588079011  
AGCAAACA 0.4959297533  
AGCAAACC -0.0113941464397  
AGCAAACG 0.0587457746023  
AGCAAAC T 0.739390502325  
AGCAAAGA 1.52142227511  
AGCAAAGC -0.820669461371  
AGCAAAGG -0.280512635481  
AGCAAATA 2.78728549274  
AGCAAATC 9.89574142773  
AGCAAATG 0.821748705972  
AGCAACAA 0.728682743951  
AGCAACAC 0.891753754112  
AGCAACAG -0.675506749732  
AGCAACAT -0.50493461059  
AGCAACCA 0.333671639896  
AGCAACCC -0.468488345287  
AGCAACCG -0.300502054253  
AGCAACCT -0.401303081782  
AGCAACGA -0.246706847039  
AGCAACGC -0.650774300557  
AGCAACGG -0.337061759169  
AGCAACTA 0.612108121377  
AGCAACTC -0.119457661554  
AGCAACTG -0.372158772685  
AGCAAGAA 0.226736770505  
AGCAAGAC -0.285594939192  
AGCAAGAG -0.49582154132  
AGCAAGAT 3.8997286928  
AGCAAGCA -0.466982525925  
AGCAAGCC -0.704841606011  
AGCAAGCG 0.125221648462  
AGCAAGCT -0.663021596519  
AGCAAGGA -0.0901123500107  
AGCAAGGC -0.283222117083  
AGCAAGGG -0.925454467153  
AGCAAGTA -0.148189771877  
AGCAAGTC -0.3624267518  
AGCAAGTG -0.12265984746  
AGCAATAA 0.596888132548  
AGCAATAC 1.39900577391  
AGCAATAG 0.111556618734  
AGCAATAT 3.25980617188  
AGCAATCA 4.60222622868  
AGCAATCC 11.3012681496  
AGCAATCG 5.78344519924  
AGCAATGA -0.611754210699  
AGCAATGC -1.01895562953  
AGCAATGG -0.518121573382  
AGCAATTA 1.10335234823



AGCAATTC 1.56745627866  
AGCAATTG 1.21358846715  
AGCACAAA 0.773368541237  
AGCACAAC -0.217027228437  
AGCACAAAG 0.0478508670069  
AGCACAAAT 0.990809798119  
AGCACACA 0.819808209019  
AGCACACC -0.927914067951  
AGCACACG -0.472003666343  
AGCACACT -0.519935300262  
AGCACAGA -0.429291561471  
AGCACAGC -0.901235894192  
AGCACAGG -0.898586007594  
AGCACATA 1.03668409751  
AGCACATC 0.423844369055  
AGCACATG -0.0265694390162  
AGCACCAA 0.415398606994  
AGCACCCAC -1.46697335253  
AGCACCCAG -0.923685436526  
AGCACCCAT -0.183097545119  
AGCACCCA -0.268063030165  
AGCACCCC -0.230141004383  
AGCACCCG -1.57653406141  
AGCACCCCT -1.33007735656  
AGCACCGA 0.156253394048  
AGCACCGC 0.0499126450193  
AGCACCGG -1.01525342063  
AGCACCTA -0.676965259026  
AGCACCTC -0.730735634989  
AGCACCTG -0.607640064412  
AGCACGAA 0.534842153942  
AGCACGAC -0.647770764662  
AGCACGAG -0.907478209417  
AGCACGAT 1.86126617996  
AGCACGCA 0.0634603144108  
AGCACGCC -0.759467222549  
AGCACGCG 0.266355946976  
AGCACGCT -0.393138304934  
AGCACGGA 0.0400292841922  
AGCACGGC -0.973245739157  
AGCACGGG -0.82625649294  
AGCACGTA -0.683293568795  
AGCACGTC -0.433484122237  
AGCACGTG -0.164342108852  
AGCACTAA 0.46818226744  
AGCACTAC 0.105398468383  
AGCACTAG -0.116525482834  
AGCACTAT 0.149602016629  
AGCACTCA -0.596181095337  
AGCACTCC -0.158781999587  
AGCACTCG -0.155551323087  
AGCACTGA 0.128034114412  
AGCACTGC -0.394496182315  
AGCACTGG -1.19666557723

AGCACTTA 0.46349700237  
AGCACTTC -1.09574196174  
AGCACTTG -0.609961655728  
AGCAGAAA 0.258685181341  
AGCAGAAC 0.597435204224  
AGCAGAAG -0.4902948889  
AGCAGAAT 1.74174265025  
AGCAGACA 0.0958256288893  
AGCAGACC -0.853238914874  
AGCAGACG -0.0708430375295  
AGCAGACT -0.145883602075  
AGCAGAGA 0.0682409837626  
AGCAGAGC -0.69268631637  
AGCAGAGG -0.455569298629  
AGCAGATA 3.17302669857  
AGCAGATC 5.05930448325  
AGCAGATG 0.317570010951  
AGCAGCAA 0.519751026238  
AGCAGCAC -0.621069327941  
AGCAGCAG -0.74830100086  
AGCAGCAT -0.196551117137  
AGCAGCCA -0.872768302041  
AGCAGCCC -0.551556984106  
AGCAGCCG -0.853416392976  
AGCAGCCT -1.01317047071  
AGCAGCGA 0.379490526392  
AGCAGCGC 0.0861022335976  
AGCAGCGG -1.10237634935  
AGCAGCTA -1.29641506661  
AGCAGCTC -1.57540175635  
AGCAGCTG -1.56599306449  
AGCAGGAA -0.724196390274  
AGCAGGAC -1.3459986322  
AGCAGGAG -1.67694406208  
AGCAGGAT 1.38765318715  
AGCAGGCA -0.72988797448  
AGCAGGCC -2.14788312119  
AGCAGGCG -0.336782342245  
AGCAGGCT -0.852497113911  
AGCAGGGA -0.730074339556  
AGCAGGGC -0.184538541846  
AGCAGGGG -0.49583617869  
AGCAGGTA -1.09151385308  
AGCAGGTC -1.03067179809  
AGCAGGTG -1.14107180327  
AGCAGTAA 0.183846664768  
AGCAGTAC -0.00510582805452  
AGCAGTAG -0.831103030453  
AGCAGTAT 1.75504828028  
AGCAGTCA 0.206475253493  
AGCAGTCC -0.903872188948  
AGCAGTCG -0.923745554292  
AGCAGTGA -0.0796777354021  
AGCAGTGC -0.770652786477

AGCAGTGG -1.11519633239  
AGCAGTTA -0.430020293355  
AGCAGTTC -1.08374036448  
AGCAGTTG 0.542684647284  
AGCATAAA 1.21152459808  
AGCATAAC 0.954755343825  
AGCATAAG -0.373224686824  
AGCATAAT 2.46032273421  
AGCATACA -0.296061180974  
AGCATACC 0.148262435961  
AGCATACG -0.448836108771  
AGCATACT 0.00926153401535  
AGCATAGA 0.00919383618254  
AGCATAGC -1.05143072428  
AGCATAGG 0.70863948057  
AGCATATA 1.95463351496  
AGCATATC 5.72320196949  
AGCATATG 1.32408596766  
AGCATCAA 0.992276410243  
AGCATCAC 0.163751125068  
AGCATCAG 0.32499873723  
AGCATCAT 1.41653977399  
AGCATCCA 0.102059579903  
AGCATCCC -0.2241153745  
AGCATCCG 0.516654699878  
AGCATCCT -0.282208479262  
AGCATCGA 0.670126993767  
AGCATCGC -0.905196086721  
AGCATCGG 0.625337950751  
AGCATCTA 1.3021850653  
AGCATCTC 1.60476222802  
AGCATCTG 0.270230406342  
AGCATGAA 0.6290195105  
AGCATGAC -1.38342952197  
AGCATGAG -0.629514567239  
AGCATGAT 1.94993073733  
AGCATGCA -0.291461387685  
AGCATGCC -1.10316572177  
AGCATGCG -0.623741954739  
AGCATGCT -0.154895255286  
AGCATGGA -0.0154894732523  
AGCATGGC -1.27655633864  
AGCATGGG -1.02229007452  
AGCATGTA 0.808574028115  
AGCATGTC -0.0735452004468  
AGCATGTG -0.437581017339  
AGCATTAA 0.72338401628  
AGCATTAC 1.16950254062  
AGCATTAG 0.369822543999  
AGCATTAT 0.612127986378  
AGCATTCA 0.0997139414796  
AGCATTCC -0.523775780021  
AGCATTCCG -0.896636100903  
AGCATTGA -0.355326843566

AGCATTGC 0.475763117807  
AGCATTGG -0.748659093643  
AGCATTTA 1.55207083528  
AGCATTTT 0.433070093792  
AGCATTTG -0.0931511724209  
AGCCAAAA 1.05695554703  
AGCCAAAC -0.829695751952  
AGCCAAAG -1.32827434632  
AGCCAAAT 0.957184101595  
AGCCAACA -0.512105614618  
AGCCAACC -0.0486682072509  
AGCCAACG -1.20933239066  
AGCCAACT -0.21981721557  
AGCCAAGA -0.347752527739  
AGCCAAGC -0.174954201563  
AGCCAAGG -1.49314549152  
AGCCAATA 0.0468636287269  
AGCCAATC 1.07260184923  
AGCCAATG -0.250150026775  
AGCCACAA 0.185194086884  
AGCCACAC -1.04582513461  
AGCCACAG -1.29782234511  
AGCCACAT -0.415652669903  
AGCCACCA 1.10175478392  
AGCCACCC -1.85626438178  
AGCCACCG -1.09510105407  
AGCCACCT -1.4703407316  
AGCCACGA 0.262880094541  
AGCCACGC -0.922683299495  
AGCCACGG -0.838999368404  
AGCCACTA 0.159039721839  
AGCCACTC -0.725044312164  
AGCCACTG -0.596702290235  
AGCCAGAA 0.256003144806  
AGCCAGAC -0.0343554739342  
AGCCAGAG -1.22283823899  
AGCCAGAT 1.08335691768  
AGCCAGCA -1.32546135761  
AGCCAGCC -1.6692738192  
AGCCAGCG -0.587813747754  
AGCCAGCT -0.648138005802  
AGCCAGGA -0.31624637456  
AGCCAGGC -1.08770029562  
AGCCAGGG -1.28397356413  
AGCCAGTA -0.670817302556  
AGCCAGTC -0.968211268277  
AGCCAGTG -0.547698730399  
AGCCATAA 0.776818255513  
AGCCATAC -0.213627176664  
AGCCATAG -0.532604204735  
AGCCATAT 2.1169535758  
AGCCATCA 0.887770560003  
AGCCATCC -0.832891403318  
AGCCATCG -0.236907912466

AGCCATGA 0.245277873865  
AGCCATGC -1.15960872453  
AGCCATGG -1.12640934138  
AGCCATTA -0.150506135562  
AGCCATTC -0.355687288784  
AGCCATTG -0.83553188018  
AGCCCAAA -0.578661732627  
AGCCCAAC -0.450206793849  
AGCCCAAG -1.10136375706  
AGCCCAAT -0.318753285426  
AGCCCACA -1.10590081877  
AGCCCACC -1.48800542248  
AGCCCACG -0.819984902977  
AGCCCACT -1.33868883455  
AGCCCAGA -0.361512177603  
AGCCCAGC -1.39596930394  
AGCCCAGG -1.59469903666  
AGCCCATA 0.371566481993  
AGCCCATC -1.78135947428  
AGCCCATG -0.43144952791  
AGCCCAA -1.07565112691  
AGCCCCAC -1.29840104396  
AGCCCCAG -0.933621073672  
AGCCCCAT -1.08802911367  
AGCCCCCA -1.41788275262  
AGCCCCCC -1.25727055911  
AGCCCCCG -1.24786395831  
AGCCCCCT -1.25263940003  
AGCCCCGA -0.111449975044  
AGCCCCGC -1.3673524629  
AGCCCCGG -1.09601170754  
AGCCCCCTA -0.76205673  
AGCCCCCTC -1.7510392094  
AGCCCCCTG -1.09486842445  
AGCCCGAA -0.634484738246  
AGCCCGAC -0.761206978438  
AGCCCGAG -0.896120133637  
AGCCCGAT 1.48381782796  
AGCCCGCA -0.332086883293  
AGCCCGCC -1.39784105753  
AGCCCGCG -1.89945533773  
AGCCCGCT -1.28304827328  
AGCCCGGA -1.1308653748  
AGCCCGGC -1.5674471303  
AGCCCGGG -0.922972387538  
AGCCCGTA -0.845807836161  
AGCCCGTC -0.69963958953  
AGCCCGTG -0.39450533067  
AGCCCTAA -0.575324935199  
AGCCCTAC -0.507093361174  
AGCCCTAG -1.12276411368  
AGCCCTAT -0.746030378954  
AGCCCTCA -0.987112294093  
AGCCCTCC -1.59299822663

AGCCCTCG -0.88532507381  
AGCCCTGA -0.901901894493  
AGCCCTGC -1.27062062402  
AGCCCTGG -1.68065751038  
AGCCCTTA -1.57985203936  
AGCCCTTC -0.839724440945  
AGCCCTTG -1.67355629524  
AGCCGAAA 0.325740538194  
AGCCGAAC -0.357591453695  
AGCCGAAG -0.480541696106  
AGCCGAAT 0.776593467343  
AGCCGACA -0.457843057114  
AGCCGACC -1.06377708386  
AGCCGACG -0.997873897075  
AGCCGACT -1.06401912322  
AGCCGAGA -0.840284581701  
AGCCGAGC -1.6939179214  
AGCCGAGG -0.516910069695  
AGCCGATA 0.99132158328  
AGCCGATC 0.778200964145  
AGCCGATG -0.348220923555  
AGCCGCAA 0.154101439386  
AGCCGCAC -0.781928265673  
AGCCGCAG -1.12584475714  
AGCCGCAT 0.11358441714  
AGCCGCCA -0.624917910529  
AGCCGCCC -0.989569281075  
AGCCGCCG -0.911172315483  
AGCCGCCT -0.907746909695  
AGCCGCGA -0.38564972227  
AGCCGCGC -0.705953523311  
AGCCGCGG -0.797778445525  
AGCCGCTA -1.27744817263  
AGCCGCTC -1.22518283189  
AGCCGCTG -0.963429030636  
AGCCGGAA 0.218642043924  
AGCCGGAC -0.988639546746  
AGCCGGAG -1.4840332064  
AGCCGGAT 2.23097868231  
AGCCGGCA -0.720204831954  
AGCCGGCC -1.25419671157  
AGCCGGCG -0.943917417417  
AGCCGGCT -0.66851217828  
AGCCGGGA 0.122140482233  
AGCCGGGC -1.70538159534  
AGCCGGGG -0.658791658186  
AGCCGGTA -1.30483390637  
AGCCGGTC -1.27873861356  
AGCCGGTG -0.95491687765  
AGCCGTAA -0.455307917035  
AGCCGTAC -0.181262907712  
AGCCGTAG -0.656211821855  
AGCCGTAT 0.491889316622  
AGCCGTCA -1.40297380789

AGCCGTCC -0.672213864412  
AGCCGTCG -1.21858242388  
AGCCGTGA -0.299832917373  
AGCCGTGC -0.349936632338  
AGCCGTGG -1.00046157485  
AGCCGTTA -0.332289715409  
AGCCGTTC -0.843804869007  
AGCCGTTG -0.307400437279  
AGCCTAAA 0.144839905371  
AGCCTAAC -1.0923641274  
AGCCTAAG -0.38083324364  
AGCCTAAT 0.13501666231  
AGCCTACA -0.541468438728  
AGCCTACC -0.122606786997  
AGCCTACG -0.192104754844  
AGCCTACT -0.215184749582  
AGCCTAGA -0.531033301356  
AGCCTAGC -1.31881154848  
AGCCTAGG -1.37655989092  
AGCCTATA 0.550986649468  
AGCCTATC 0.799951572097  
AGCCTATG -0.83268177528  
AGCCTCAA -0.368325350229  
AGCCTCAC -0.664572112134  
AGCCTCAG -0.0842919046785  
AGCCTCAT -0.958638428784  
AGCCTCCA -1.20459328098  
AGCCTCCC -1.3565485161  
AGCCTCCG -0.739292222846  
AGCCTCCT -0.210550453923  
AGCCTCGA -0.762806372411  
AGCCTCGC -1.31325222336  
AGCCTCGG -0.229703451595  
AGCCTCTA -0.494000757137  
AGCCTCTC -0.751508937161  
AGCCTCTG 0.306263427345  
AGCCTGAA -0.689835427326  
AGCCTGAC -0.565468758058  
AGCCTGAG -0.975105469197  
AGCCTGAT -0.0243733108645  
AGCCTGCA -0.585877432907  
AGCCTGCC -1.89081824435  
AGCCTGCG -0.533756636182  
AGCCTGGA -0.0485929293519  
AGCCTGGC -0.511664141106  
AGCCTGGG -1.49150427649  
AGCCTGTA -0.919859332755  
AGCCTGTC -0.584926526668  
AGCCTGTG 0.0377027266252  
AGCCTTAA -0.827277449445  
AGCCTTAC -0.430490780224  
AGCCTTAG -1.05588257558  
AGCCTTAT 0.164593557945  
AGCCTTCA -1.29615211673

AGCCTTCC -1.46423328928  
AGCCTTCG -1.13250188496  
AGCCTTGA 0.516041237277  
AGCCTTGC -1.49749854059  
AGCCTTGG -1.31907998738  
AGCCTTTA -1.21717514538  
AGCCTTTC -1.16532278755  
AGCCTTTG -1.47959834489  
AGCGAAAA 1.73569558707  
AGCGAAAC -0.616035641207  
AGCGAAAG -0.0912556331022  
AGCGAAAT 4.28449024042  
AGCGAACA 0.742304384333  
AGCGAACG -0.47705904775  
AGCGAACG -1.03869751993  
AGCGAACT -0.955041818052  
AGCGAAGA 0.985699526578  
AGCGAAGC -1.45731216606  
AGCGAAGG -1.49178578447  
AGCGAATA 1.2778334491  
AGCGAATC 11.2533853941  
AGCGAATG -0.501709945867  
AGCGACAA -0.991169459193  
AGCGACAC -0.517130414378  
AGCGACAG 0.765236959852  
AGCGACAT 0.334495776062  
AGCGACCA -0.460030559673  
AGCGACCC -1.13829122588  
AGCGACCG -1.3144943087  
AGCGACCT -0.55435376716  
AGCGACGA 0.590400641389  
AGCGACGC -0.107068696768  
AGCGACGG -1.28994064453  
AGCGACTA -0.614357571374  
AGCGACTC -1.1012267931  
AGCGACTG -0.995438604765  
AGCGAGAA 0.466872484274  
AGCGAGAC -0.749525835008  
AGCGAGAG -0.324079458165  
AGCGAGAT 3.31812615586  
AGCGAGCA -0.345499941163  
AGCGAGCC -0.760138973246  
AGCGAGCG -1.41985147879  
AGCGAGCT -0.825144052876  
AGCGAGGA 0.449885294488  
AGCGAGGC -0.509149388791  
AGCGAGGG -1.20904382538  
AGCGAGTA 0.809739790024  
AGCGAGTC -0.33611581918  
AGCGAGTG -0.360627139527  
AGCGATAA -0.150115631461  
AGCGATAC 1.66482405895  
AGCGATAG -0.409214841247  
AGCGATAT 5.04646751041



AGCGATCA 2.20739683491  
AGCGATCC 4.15952840526  
AGCGATCG 2.68029155111  
AGCGATGA -0.294639787866  
AGCGATGC -0.571745314271  
AGCGATGG -0.981022625719  
AGCGATTA 1.83890629152  
AGCGATTC 2.86980470745  
AGCGATTG 1.16082205789  
AGCGCAA 0.512921647954  
AGCGCAAC 0.270592158468  
AGCGCAAG -0.0810042469909  
AGCGCAAT 2.96902986535  
AGCGCACA -0.474751571039  
AGCGCACC -0.769140955338  
AGCGCACG -0.845460460022  
AGCGCACT -0.669991598101  
AGCGCAGA -0.134100519823  
AGCGCAGC -1.18880138922  
AGCGCAGG -0.949400680493  
AGCGCATA 2.43227910301  
AGCGCATC 0.0209377111948  
AGCGCATG -0.778302902966  
AGCGCCAA -0.646640812032  
AGCGCCAC -0.742396652036  
AGCGCCAG -0.821816665186  
AGCGCCAT -0.1151129767  
AGCGCCCA -0.788758166721  
AGCGCCCC -1.32476242323  
AGCGCCCG -1.44246098666  
AGCGCCCT -0.590959736618  
AGCGCCGA -0.814831503472  
AGCGCCGC -1.62393430655  
AGCGCCGG -1.25674727316  
AGCGCCTA -0.796844790472  
AGCGCCTC -1.42316788845  
AGCGCCTG -0.932651870722  
AGCGCGAA 0.562858601462  
AGCGCGAC -0.217581618798  
AGCGCGAG 0.182037904138  
AGCGCGAT 6.25027847628  
AGCGCGCA 0.462696129167  
AGCGCGCC -0.364910661087  
AGCGCGCG 1.06976324512  
AGCGCGCT 1.90494173739  
AGCGCGGA 0.0400567292595  
AGCGCGGC -1.32202157584  
AGCGCGGG -1.01732931325  
AGCGCGTA 0.485644910345  
AGCGCGTC -0.766851775339  
AGCGCGTG -1.2031841728  
AGCGCTAA -0.609716479793  
AGCGCTAC -0.686879462881  
AGCGCTAG -0.400781102739

AGCGCTAT -0.552757771148  
AGCGCTCA -0.266060324393  
AGCGCTCC -0.0725731222993  
AGCGCTCG -1.52921562871  
AGCGCTGA 0.292245793848  
AGCGCTGC -0.228415624482  
AGCGCTGG -0.323226308642  
AGCGCTTA 0.0425116251891  
AGCGCTTC -0.344501986238  
AGCGCTTG -0.29370561005  
AGCGGAAA 1.16690858968  
AGCGGAAC -0.078384157894  
AGCGGAAG 1.09315689778  
AGCGGAAT 2.68518043244  
AGCGGACA -0.774717793025  
AGCGGACC -1.07000580724  
AGCGGACG -0.156151455227  
AGCGGACT -0.962000318844  
AGCGGAGA -0.0900101498075  
AGCGGAGC 0.241266189163  
AGCGGAGG -1.42388276711  
AGCGGATA 3.05666797719  
AGCGGATC 3.96111991051  
AGCGGATG -0.424077782818  
AGCGGCAA -0.63301760336  
AGCGGCAC -0.1457795722  
AGCGGCAG -0.595189152188  
AGCGGCAT -0.758884341595  
AGCGGCCA -0.868001224532  
AGCGGCCC -1.92792449817  
AGCGGCCG -0.219593734307  
AGCGGCCT -0.679401074099  
AGCGGCGA -0.0229947843385  
AGCGGCGC -0.626194236852  
AGCGGCGG -1.16139160838  
AGCGGCTA -1.22518283189  
AGCGGCTC -1.28369440858  
AGCGGCTG -1.1946793385  
AGCGGGAA -1.10152738194  
AGCGGGAC -0.637543164276  
AGCGGGAG -0.12476057133  
AGCGGGAT 2.16943638604  
AGCGGGCA -0.207414136178  
AGCGGGCC -1.762345793  
AGCGGGCG -0.814281556598  
AGCGGGGA -0.567935938922  
AGCGGGGC -1.33484704788  
AGCGGGGG -0.87180223567  
AGCGGGTA -1.10786118072  
AGCGGGTC -0.966686368059  
AGCGGGTG -0.197933825769  
AGCGGTAA 1.03845913992  
AGCGGTAC -0.201791295331  
AGCGGTAG -0.534375849178

AGCGGTAT 0.800580717593  
AGCGGTCA 0.0490550520098  
AGCGGTCC -0.989308945007  
AGCGGTCCG -1.23217635781  
AGCGGTGA -0.596650275298  
AGCGGTGC -0.949544701751  
AGCGGTGG -0.682969717  
AGCGGTTA 0.593557346898  
AGCGGTTC -1.00893190679  
AGCGGTTG -0.52038749042  
AGCGTAAA 2.73721575738  
AGCGTAAC -0.627429003502  
AGCGTAAG 0.300336338323  
AGCGTAAT 6.6628578214  
AGCGTACA -0.137111635785  
AGCGTACC -0.942421269174  
AGCGTACG -0.306020342463  
AGCGTACT 0.34916947736  
AGCGTAGA 0.16226569347  
AGCGTAGC -1.25263940003  
AGCGTAGG -0.998508008822  
AGCGTATA 0.578221566022  
AGCGTATC 5.23008259109  
AGCGTATG 0.0782937198626  
AGCGTCAA 0.674787950349  
AGCGTCAC -0.704092486363  
AGCGTCAG -0.847866477594  
AGCGTCAT -0.822622766022  
AGCGTCCA -0.266973330301  
AGCGTCCC -1.66093051873  
AGCGTCCG -0.378270397112  
AGCGTCCT -1.08265040323  
AGCGTCGA -0.67058179774  
AGCGTCGC -1.04695195067  
AGCGTCGG -1.02098212103  
AGCGTCTA 0.229540088099  
AGCGTCTC -0.947992095084  
AGCGTCTG -0.0511826981839  
AGCGTGAA 0.0867839167944  
AGCGTGAC -0.423973230181  
AGCGTGAG -0.251806663317  
AGCGTGAT 1.35317303419  
AGCGTGCA -0.568422892832  
AGCGTGCC -1.51304760884  
AGCGTGCG 0.256879034527  
AGCGTGGA -0.346197830019  
AGCGTGGC -0.849303030834  
AGCGTGGG -0.608031614039  
AGCGTGTA -0.259840487986  
AGCGTGTC -0.566517943776  
AGCGTGTG -0.512980720194  
AGCGTTAA 0.700441246879  
AGCGTTAC 0.306429143276  
AGCGTTAG -0.110596825522

AGCGTTAT 0.0385158847637  
AGCGTTCA -1.46202958106  
AGCGTTCC -0.836036346656  
AGCGTTCCG -0.861935080502  
AGCGTTGA -0.0818898078309  
AGCGTTGC -0.550057699284  
AGCGTTGG 0.235979746427  
AGCGTTTA 0.616584542554  
AGCGTTTC -0.764947349046  
AGCGTTTG 0.0495882704613  
AGCTAAAA -0.471417910191  
AGCTAAAC 0.299223375496  
AGCTAAAG -0.460882663669  
AGCTAAAT 1.09009141444  
AGCTAACA -0.360281070296  
AGCTAACC -0.755651574042  
AGCTAACG -0.116488889411  
AGCTAACT -0.761820702421  
AGCTAAGA -0.693467063191  
AGCTAAGC 0.269149593451  
AGCTAAGG -1.08500074652  
AGCTAATA 1.42012331564  
AGCTAATC 0.207263057617  
AGCTAATG -0.0846207227236  
AGCTACAA 0.0155263280571  
AGCTACAC 0.392076050137  
AGCTACAG -0.249307855279  
AGCTACAT 0.286177820147  
AGCTACCA -1.05339448419  
AGCTACCC -0.637220619389  
AGCTACCG -0.511313628389  
AGCTACCT -0.291431590183  
AGCTACGA 0.337527279787  
AGCTACGC -0.0282618848364  
AGCTACGG -1.05489586007  
AGCTACTA -0.158068427836  
AGCTACTC -0.949277308381  
AGCTACTG -0.369776018075  
AGCTAGAA 0.915781257127  
AGCTAGAC -0.359101716545  
AGCTAGAG -0.676845546256  
AGCTAGAT 2.10315524146  
AGCTAGCA -0.15274094819  
AGCTAGCC -1.49650685882  
AGCTAGCG -1.10487254358  
AGCTAGCT -0.950388180155  
AGCTAGGA -0.774236066748  
AGCTAGGC -0.732092728224  
AGCTAGGG -0.742144941561  
AGCTAGTA 0.32705842419  
AGCTAGTC 0.0584318553081  
AGCTAGTG -0.431950596426  
AGCTATAA 0.276682872368  
AGCTATAC -0.234149029743

AGCTATAG 0.591205173934  
AGCTATAT 1.20429739701  
AGCTATCA -0.0876496126333  
AGCTATCC 0.295352575473  
AGCTATCG 0.153281746708  
AGCTATGA -0.654986987706  
AGCTATGC 0.0776188325872  
AGCTATGG -0.163582795322  
AGCTATTA 0.696868944635  
AGCTATTC -0.116091589388  
AGCTATTG -0.0339981652954  
AGCTCAAA -0.696244765389  
AGCTCAAC 0.971704371898  
AGCTCAAG -0.471695236062  
AGCTCAAT -0.244861754368  
AGCTCACA -0.942848889461  
AGCTCACC -0.953940878779  
AGCTCACG -0.344501986238  
AGCTCACT -0.379923374312  
AGCTCAGA 0.252630015337  
AGCTCAGC -1.22806273429  
AGCTCAGG -1.28640258328  
AGCTCATA 0.649984405381  
AGCTCATC -0.756942799116  
AGCTCATG -0.111149908974  
AGCTCCAA -0.722537924061  
AGCTCCAC -1.12161769401  
AGCTCCAG -1.12169767677  
AGCTCCAT -0.653382888864  
AGCTCCCA -1.05791664715  
AGCTCCCC -1.10455940843  
AGCTCCCG -1.08847555343  
AGCTCCCT -0.959801054113  
AGCTCCGA 0.266733643379  
AGCTCCGC -0.478905970092  
AGCTCCGG -1.06255747735  
AGCTCCTA 0.143419819171  
AGCTCCTC -0.77251120961  
AGCTCCTG -0.894800940733  
AGCTCGAA 0.184862655023  
AGCTCGAC -0.773977560351  
AGCTCGAG 0.603983858677  
AGCTCGAT 0.568672250872  
AGCTCGCA -0.686369768773  
AGCTCGCC -1.28186447604  
AGCTCGCG -0.416159227432  
AGCTCGGA 0.689569602245  
AGCTCGGC -0.81662693364  
AGCTCGGG -0.983944871938  
AGCTCGTA -0.577277717087  
AGCTCGTC -0.53676879767  
AGCTCGTG -1.45273432882  
AGCTCTAA 0.128319543112  
AGCTCTAC -1.03192878218

AGCTCTAG -0.749866937988  
AGCTCTAT 0.00303464030475  
AGCTCTCA 0.1868596104  
AGCTCTCC -0.827971156195  
AGCTCTCG -0.536784219184  
AGCTCTGA -1.00853434538  
AGCTCTGC -1.29273141581  
AGCTCTGG -0.534774978872  
AGCTCTTA 0.578033894038  
AGCTCTTC -1.14331759393  
AGCTCTTG -0.811079893455  
AGCTGAAA 1.73296545633  
AGCTGAAC -0.389648860656  
AGCTGAAG 0.162625354543  
AGCTGAAT -0.0243403767837  
AGCTGACA -0.256720114518  
AGCTGACC -1.16937472502  
AGCTGACG -0.62388153251  
AGCTGACT -0.274744466468  
AGCTGAGA -0.347285438831  
AGCTGAGC -0.68453094926  
AGCTGAGG -0.316064191589  
AGCTGATA 0.685336004569  
AGCTGATC 0.740361012183  
AGCTGATG -0.353947271514  
AGCTGCAA -0.404527485124  
AGCTGCAC -0.114615828909  
AGCTGCAG -0.150251027127  
AGCTGCAT -0.708121945014  
AGCTGCCA -0.00795462604603  
AGCTGCCC -1.33463428327  
AGCTGCCG -1.16996753847  
AGCTGCCT -0.992724156913  
AGCTGCGA -0.836582634187  
AGCTGCGC -0.950388180155  
AGCTGCGG -1.39600459045  
AGCTGCTA -1.57540175635  
AGCTGCTC -1.12853123716  
AGCTGCTG -1.07776282881  
AGCTGGAA 0.643888986612  
AGCTGGAC -0.763855558129  
AGCTGGAG -1.0466304513  
AGCTGGAT 2.36755971346  
AGCTGGCA -0.924526562495  
AGCTGGCC -1.25740334096  
AGCTGGCG -0.686160663498  
AGCTGGGA -1.11378042829  
AGCTGGGC -0.943619965163  
AGCTGGGG -0.871639133556  
AGCTGGTA -0.81883586949  
AGCTGGTC -1.41963427068  
AGCTGGTG -0.852289576925  
AGCTGTAA 0.154556766122  
AGCTGTAC 0.0394215719864

AGCTGTAG 0.29444688825  
AGCTGTAT -0.244788567521  
AGCTGTCA 0.0335331674399  
AGCTGTCC -0.936185749871  
AGCTGTCCG 0.0891488974557  
AGCTGTGA -0.38143834203  
AGCTGTGC -0.628771197986  
AGCTGTGG -1.19475801436  
AGCTGTTA -0.580302686273  
AGCTGTTC 0.166165506851  
AGCTGTTG -0.497699829454  
AGCTTAAA 0.168621448307  
AGCTTAAC -0.546965032265  
AGCTTAAG -0.670630676098  
AGCTTAAT -0.59163253284  
AGCTTACA 0.0742647839748  
AGCTTACC -0.25308795589  
AGCTTACG 0.051093828442  
AGCTTACT 0.357562178957  
AGCTTAGA -0.692059000545  
AGCTTAGC -0.445594977007  
AGCTTAGG -0.935983440517  
AGCTTATA 0.142942274999  
AGCTTATC 0.450310039578  
AGCTTATG -0.827585095581  
AGCTTCAA -1.29292666786  
AGCTTCAC -1.34170387124  
AGCTTCAG -0.639416486159  
AGCTTCAT -0.497547705366  
AGCTTCCA -0.16231326492  
AGCTTCCC -1.09843314663  
AGCTTCCG -0.90597003762  
AGCTTCCT -0.772888644631  
AGCTTCGA -0.565747390837  
AGCTTCGC -1.11448354478  
AGCTTCGG -0.883235589349  
AGCTTCTA 0.00178680457565  
AGCTTCTC 0.355495434694  
AGCTTCTG -0.324387365682  
AGCTTGAA -0.0278622323794  
AGCTTGAC -0.778780447138  
AGCTTGAG -0.74584767322  
AGCTTGAT 0.548379629451  
AGCTTGCA 0.729834914016  
AGCTTGCC -0.87955742756  
AGCTTGCG 0.00235896888461  
AGCTTGGA -0.496527271624  
AGCTTGGC -0.389715774344  
AGCTTGGG -0.431912173331  
AGCTTGTA 0.500701012915  
AGCTTGTC -0.133297294186  
AGCTTGTG -0.614436247234  
AGCTTTAA 0.535768751692  
AGCTTTAC 0.661788659541

AGCTTTAG -0.840590920929  
AGCTTTAT -0.923218608999  
AGCTTTCA -0.524109302935  
AGCTTTCC -0.692181849894  
AGCTTTCG -0.769440237263  
AGCTTTGA 1.23382463014  
AGCTTTGC -0.299390136953  
AGCTTTGG -0.494267889126  
AGCTTTTA 1.91756725252  
AGCTTTTC -0.0897435405817  
AGCTTTTG 0.395549288756  
AGGAAAAA 2.17031175299  
AGGAAAAC -0.488139013514  
AGGAAAAG -0.550461272465  
AGGAAAAT 1.28022665898  
AGGAAACA 0.269729860589  
AGGAAACC 0.693312586669  
AGGAAACG -0.91566363541  
AGGAAACT -0.663427260753  
AGGAAAGA -1.00501039873  
AGGAAAGC -0.30430933855  
AGGAAAGG -1.16826646706  
AGGAAATA 2.47461429562  
AGGAAATC 23.9715950612  
AGGAAATG 0.0728465274465  
AGGAACAA 1.12611110499  
AGGAACAC -0.373017149839  
AGGAACAG -0.602345518846  
AGGAACAT 0.358122581094  
AGGAACCA 0.343927469495  
AGGAACCC -0.76298332775  
AGGAACCG -1.2044892511  
AGGAACCT -0.636664137976  
AGGAACGA -0.561734137845  
AGGAACGC -0.843274787135  
AGGAACGG -0.723439951941  
AGGAACTA -0.338316129438  
AGGAACTC -0.578063430158  
AGGAACTG -0.10521602403  
AGGAAGAA 0.0060907139002  
AGGAAGAC -0.859633354186  
AGGAAGAG -1.18550719699  
AGGAAGAT 3.32651049325  
AGGAAGCA -0.356992889845  
AGGAAGCC -1.24959430447  
AGGAAGCG -0.67795328145  
AGGAAGGA -0.670427321218  
AGGAAGGC -1.43370261221  
AGGAAGGG -1.23281099232  
AGGAAGTA 0.79997666473  
AGGAAGTC -0.724196390274  
AGGAAGTG -0.0290928169233  
AGGAATAA 2.53784093489  
AGGAATAC 0.854436826719



AGGAATAG -1.14705116861  
AGGAATAT 6.00968351505  
AGGAATCA 4.03125747912  
AGGAATCC 8.05071201099  
AGGAATCG 4.63371434653  
AGGAATGA 0.308188764166  
AGGAATGC -0.989172503815  
AGGAATGG -0.850675545583  
AGGAATTA 1.9312343733  
AGGAATTC 0.899519662647  
AGGAATTG 0.811247177675  
AGGACAAA -0.168252377496  
AGGACAAC -0.440433213291  
AGGACAAG -1.24428512153  
AGGACAAT 1.08193970668  
AGGACACA -0.0876621589498  
AGGACACC -0.612977476558  
AGGACACG -0.940383015505  
AGGACACT -0.488075759168  
AGGACAGA 0.155066198849  
AGGACAGC -0.789376595572  
AGGACAGG -1.20104345755  
AGGACATA 1.22540500624  
AGGACATC 0.916629701781  
AGGACATG -0.567062663017  
AGGACCAA -0.796526427691  
AGGACCAC -0.862525802904  
AGGACCAG -1.40587122286  
AGGACCAT -0.693211693374  
AGGACCCA -0.96713437611  
AGGACCCC -1.52559444811  
AGGACCCG -0.710243840793  
AGGACCCT -1.59151932957  
AGGACCGA 0.0107480111397  
AGGACCGC -0.874177148832  
AGGACCGG -1.14724354547  
AGGACCTA 0.134881789408  
AGGACCTC -1.56891165137  
AGGACCTG -1.14012220394  
AGGACGAA -0.137247815595  
AGGACGAC -1.23182767477  
AGGACGAG -1.19176833169  
AGGACGAT 2.63021188325  
AGGACGCA 0.703213721445  
AGGACGCC -0.851525297145  
AGGACGCG 0.189433696336  
AGGACGGA -0.371915687802  
AGGACGGC -1.56771295538  
AGGACGGG -0.699466032152  
AGGACGTA 0.687250101981  
AGGACGTC -0.669895932438  
AGGACGTG -0.382708656576  
AGGACTAA -0.722659989265  
AGGACTAC -0.960070277155

AGGACTAG -0.356778034175  
AGGACTAT 0.232589888536  
AGGACTCA -0.676874298231  
AGGACTCC -1.85590759591  
AGGACTCG -0.42329259251  
AGGACTGA -0.421184288574  
AGGACTGC -1.21048299243  
AGGACTGG -0.425410828947  
AGGACTTA -0.7327676155  
AGGACTTC -1.02276212968  
AGGACTTG 0.248104977184  
AGGAGAAA -0.505622828327  
AGGAGAAC -0.24957524865  
AGGAGAAG -0.00156358469449  
AGGAGAAT 3.45226745121  
AGGAGACA -0.821856395189  
AGGAGACC -1.27366023058  
AGGAGACG -1.49773430678  
AGGAGACT -1.61139164939  
AGGAGAGA 0.331522821813  
AGGAGAGC -1.03742955782  
AGGAGAGG -1.70633642231  
AGGAGATA 3.14691206353  
AGGAGATC 6.14776670622  
AGGAGATG -0.451308517267  
AGGAGCAA -0.705655025531  
AGGAGCAC -1.59903195934  
AGGAGCAG -0.863028178328  
AGGAGCAT -0.332990740844  
AGGAGCCA -0.853506569626  
AGGAGCCC -1.72540917583  
AGGAGCCG -0.65263272369  
AGGAGCCT -1.31155376576  
AGGAGCGA 0.00748962819055  
AGGAGCGC -0.13224026702  
AGGAGCGG -0.587757550711  
AGGAGCTA -0.480646771507  
AGGAGCTC -0.265817239511  
AGGAGCTG -1.08986558075  
AGGAGGAA -0.10817434091  
AGGAGGAC -1.37044878926  
AGGAGGAG -1.223522536  
AGGAGGAT 2.69053770959  
AGGAGGCA -1.86278846637  
AGGAGGCC -1.19913589468  
AGGAGGCG -1.38310985228  
AGGAGGGA -0.724148818823  
AGGAGGGC -1.68908027086  
AGGAGGGG -1.55450534344  
AGGAGGTA -0.540374556757  
AGGAGGTC -1.32479640284  
AGGAGGTG -0.267429963945  
AGGAGTAA 0.500724537258  
AGGAGTAC -0.28100612393

AGGAGTAG -0.400720984972  
AGGAGTAT 0.676845023493  
AGGAGTCA -0.915846079763  
AGGAGTCC -1.34906803626  
AGGAGTCG -0.186579932095  
AGGAGTGA -0.753032530472  
AGGAGTGC -0.96190622147  
AGGAGTGG -0.659724267713  
AGGAGTTA -0.185283218007  
AGGAGTTC 4.07755286431E-5  
AGGAGTTG -0.502084244309  
AGGATAAA 0.737125630814  
AGGATAAC 1.70600472906  
AGGATAAG 1.23839044383  
AGGATAAT 2.20980651183  
AGGATACA 1.60383327784  
AGGATACC 2.41609696853  
AGGATACG 5.58046984529  
AGGATACT 2.67581251612  
AGGATAGA -0.623391964784  
AGGATAGC 0.16524204568  
AGGATAGG 0.212805131552  
AGGATATA 2.93407844138  
AGGATATC 20.2620444795  
AGGATATG 3.9328222164  
AGGATCAA 0.825792279229  
AGGATCAC 2.80811342367  
AGGATCAG 1.73062530692  
AGGATCAT 0.873617269458  
AGGATCCA 3.20817572702  
AGGATCCC 5.41332729404  
AGGATCCG 3.46949537345  
AGGATCCT 6.43539362592  
AGGATCGA 0.127506384974  
AGGATCGC 6.38079989794  
AGGATCGG 1.18868794961  
AGGATCTA 4.10746955597  
AGGATCTC 9.53074006723  
AGGATCTG 5.27824790015  
AGGATGAA -0.874793748012  
AGGATGAC 0.467784706036  
AGGATGAG 0.448147629652  
AGGATGAT 1.11523789206  
AGGATGCA -0.218670273136  
AGGATGCC -0.808549981008  
AGGATGCG -0.254913967705  
AGGATGGA -0.227957683929  
AGGATGGC -1.02959778112  
AGGATGGG 0.00319695827454  
AGGATGTA 0.308817125517  
AGGATGTC 0.53842674112  
AGGATGTG 0.770051870193  
AGGATTAA -0.108702331729  
AGGATTAC 12.7307970206

AGGATTAG 1.38773918169  
AGGATTAT 2.99455848286  
AGGATTCA 1.74993199696  
AGGATTCC 13.4950762783  
AGGATTCG 6.38881751695  
AGGATTGA 0.349777712328  
AGGATTGC 12.170400111  
AGGATTGG 0.897371105945  
AGGATTTA 1.72443160867  
AGGATTTT 14.7779387092  
AGGATTTG 7.63242121666  
AGGCAAAA 0.65405777614  
AGGCAAAC -0.974122674404  
AGGCAAAG -1.10878176669  
AGGCAAAT 2.64975120292  
AGGCAACA -0.51975782216  
AGGCAACC -1.17913131577  
AGGCAACG -0.504593246229  
AGGCAACT -0.444644593531  
AGGCAAGA 1.27857368178  
AGGCAAGC -0.805753197954  
AGGCAAGG -0.88423615809  
AGGCAATA 0.63993323757  
AGGCAATC 9.15729974059  
AGGCAATG -0.392339522784  
AGGCACAA -0.560155915781  
AGGCACAC -1.57185114878  
AGGCACAG -0.896120133637  
AGGCACAT -0.353383210034  
AGGCACCA 0.152539684363  
AGGCACCC -0.73687235205  
AGGCACCG -1.49590437425  
AGGCACCT -0.677613485378  
AGGCACGA -0.958972213079  
AGGCACGC -0.297574057639  
AGGCACGG -1.05699945913  
AGGCACTA -0.820675734529  
AGGCACTC -1.54892092569  
AGGCACTG -0.900885642856  
AGGCAGAA -0.458059742455  
AGGCAGAC -1.69033255008  
AGGCAGAG 0.41191961798  
AGGCAGAT 2.63401759926  
AGGCAGCA -0.452092400667  
AGGCAGCC -1.46664505725  
AGGCAGCG -0.925454467153  
AGGCAGGA -0.478334589928  
AGGCAGGC -1.10830657496  
AGGCAGGG -0.572249519366  
AGGCAGTA 0.689987290032  
AGGCAGTC -0.509764681063  
AGGCAGTG -0.507657422654  
AGGCATAA -0.559190372173  
AGGCATAC -0.262532718402

AGGCATAG -0.203905872425  
AGGCATAT 1.55072890218  
AGGCATCA 1.06019458774  
AGGCATCC -0.788447645387  
AGGCATCG 0.531090282543  
AGGCATGA -0.640188346006  
AGGCATGC -1.41344762974  
AGGCATGG -0.411540614669  
AGGCATTA -0.250911692739  
AGGCATTC -0.695803553259  
AGGCATTG -0.698034183781  
AGGCCAAA -0.807156555731  
AGGCCAAC -1.11242751716  
AGGCCAAG -1.35617369489  
AGGCCAAT -0.523199433606  
AGGCCACA -0.167835996617  
AGGCCACC -0.36566553113  
AGGCCACG -0.664893088732  
AGGCCACT -0.942065790206  
AGGCCAGA 0.00826227218201  
AGGCCAGC -1.67693883444  
AGGCCAGG -0.967316036318  
AGGCCATA -0.256508134046  
AGGCCATC -1.26162779028  
AGGCCATG -1.3124976147  
AGGCCCAA -1.10294276327  
AGGCCCAC -0.895914687704  
AGGCCCAG -1.19102705349  
AGGCCCAT -1.37304300158  
AGGCCCCA -1.06710028945  
AGGCCCCC -1.7336006136  
AGGCCCCG -1.31289047124  
AGGCCCCT -1.44051421654  
AGGCCCGA -0.731619104776  
AGGCCCGC -0.824571104422  
AGGCCCGG -1.55618942505  
AGGCCCTA -1.04653138768  
AGGCCCTC -0.98102445539  
AGGCCCTG -1.06727855169  
AGGCCGAA -0.688515711659  
AGGCCGAC -1.23995246023  
AGGCCGAG -1.05374996316  
AGGCCGAT 0.462017582549  
AGGCCGCA -1.32931516783  
AGGCCGCC -1.11673822241  
AGGCCGCG -0.791445953651  
AGGCCGGA -0.854009206431  
AGGCCGGC -1.23616007469  
AGGCCGGG -1.19815309989  
AGGCCGTA -1.3933526128  
AGGCCGTC -0.232016940082  
AGGCCGTG -0.890844407546  
AGGCCTAA -0.00193187136024  
AGGCCTAC -0.482773894918

AGGCCTAG 0.149937630596  
AGGCCTAT -0.747291545144  
AGGCCTCA -0.960940155099  
AGGCCTCC -1.31453142488  
AGGCCTCG -0.897433314765  
AGGCCTGA -1.11393150686  
AGGCCTGC -1.31526433887  
AGGCCTGG -1.61589394734  
AGGCCTTA -0.643689552456  
AGGCCTTC -1.26631122568  
AGGCCTTG -1.11393150686  
AGGCGAAA -0.707584544457  
AGGCGAAC -0.336375893866  
AGGCGAAG -0.862178165384  
AGGCGAAT 1.6266317646  
AGGCGACA -0.318683235159  
AGGCGACC -1.3014210469  
AGGCGACG -0.484148239338  
AGGCGACT -0.828377081811  
AGGCGAGA 0.0430788232478  
AGGCGAGC -0.707170516013  
AGGCGAGG -0.891983247151  
AGGCGATA 1.2427845298  
AGGCGATC 4.50186928848  
AGGCGATG -1.13387230865  
AGGCGCAA -0.144626095227  
AGGCGCAC -0.934027783432  
AGGCGCAG -1.21717514538  
AGGCGCAT 0.349502738892  
AGGCGCCA -0.766834001391  
AGGCGCCC -0.983144521498  
AGGCGCCG -0.335292989923  
AGGCGCCT -1.05752352923  
AGGCGCGA 0.77823128441  
AGGCGCGC 0.308968726842  
AGGCGCGG -0.27372638516  
AGGCGCTA -1.2964720478  
AGGCGCTC -1.39962054342  
AGGCGCTG -0.50780771707  
AGGCGGAA -0.15274094819  
AGGCGGAC -0.678641499187  
AGGCGGAG -0.76385581951  
AGGCGGAT 1.66764070701  
AGGCGGCA -0.718854273258  
AGGCGGCC -1.25436608684  
AGGCGGCG -0.627527544362  
AGGCGGGA -0.611626656481  
AGGCGGGC -0.0922399961847  
AGGCGGGG 0.126488565047  
AGGCGGTA -0.945029073336  
AGGCGGTC -2.12378635205  
AGGCGGTG -0.480783212699  
AGGCGTAA -0.3653719996  
AGGCGTAC -0.745389209904

AGGCGTAG -0.8436430738  
AGGCGTAT 1.03111457851  
AGGCGTCA -0.996602798384  
AGGCGTCC -0.461612963842  
AGGCGTCG -1.35670848163  
AGGCGTGA -0.0212769845036  
AGGCGTGC -0.476835305105  
AGGCGTGG -1.938952449  
AGGCGTTA -0.323130381597  
AGGCGTTC -1.10806610389  
AGGCGTTG -0.925758715328  
AGGCTAAA 0.208909500277  
AGGCTAAC -0.544420482449  
AGGCTAAG -0.679936122222  
AGGCTAAT -0.68901939399  
AGGCTACA -1.62379838812  
AGGCTACC -1.32125677329  
AGGCTACG -0.0786518126462  
AGGCTACT -1.01679897  
AGGCTAGA 0.393162090659  
AGGCTAGC -0.860902884588  
AGGCTAGG -0.613670137782  
AGGCTATA -0.296827029044  
AGGCTATC 0.463180207879  
AGGCTATG -1.02435028424  
AGGCTCAA -0.926439352999  
AGGCTCAC -0.919945327299  
AGGCTCAG -0.785412743701  
AGGCTCAT -1.24785663963  
AGGCTCCA -0.559540100746  
AGGCTCCC -1.21362192399  
AGGCTCCG -0.70568430027  
AGGCTCGA -1.22338870863  
AGGCTCGC -1.48904284602  
AGGCTCGG -1.0569346365  
AGGCTCTA -0.512708883337  
AGGCTCTC -1.17960127988  
AGGCTCTG -1.53091094973  
AGGCTGAA -0.836972092762  
AGGCTGAC -1.28560406251  
AGGCTGAG -1.12504754328  
AGGCTGAT 0.964461749313  
AGGCTGCA -1.35193277853  
AGGCTGCC -1.37176772078  
AGGCTGCG -1.12994923231  
AGGCTGGA -0.435729912891  
AGGCTGGC -1.74460660837  
AGGCTGGG -0.668320846953  
AGGCTGTA 0.373088768396  
AGGCTGTC -1.23671551057  
AGGCTGTG -1.01264770752  
AGGCTTAA -0.368991089149  
AGGCTTAC -1.46615313709  
AGGCTTAG -0.889554227999

AGGCTTAT -0.277382329513  
AGGCTTCA -1.10567498507  
AGGCTTCC -1.55826191971  
AGGCTTCG -0.587961166973  
AGGCTTGA -0.927604853526  
AGGCTTGC -1.02880109002  
AGGCTTGG -1.28727350675  
AGGCTTTA 0.082961995129  
AGGCTTTC 0.0359326504715  
AGGCTTTG -0.71486297632  
AGGGAAAA 0.00742166897615  
AGGGAAAC -0.124772594883  
AGGGAAAG -0.0820994358692  
AGGGAAAT 2.76726000331  
AGGGAACCA -0.350005114315  
AGGGAACCC -0.858047290675  
AGGGAACG -1.17700001026  
AGGGAACT -0.717154508753  
AGGGAAGA -0.236088219788  
AGGGAAGC -0.342596514419  
AGGGAAGG -1.42207139266  
AGGGAATA 2.13569489747  
AGGGAATC 25.4860044682  
AGGGAATG 0.215921584295  
AGGGACAA 0.737971723033  
AGGGACAC -1.00922151759  
AGGGACAG -1.40985650802  
AGGGACAT -0.89408867589  
AGGGACCA -0.840688677645  
AGGGACCC -2.16291543803  
AGGGACCG -0.883404964622  
AGGGACCT -0.671410900156  
AGGGACGA -0.532150969051  
AGGGACGC -1.06621316032  
AGGGACGG -0.774708906051  
AGGGACTA -1.30864092928  
AGGGACTC -1.20220399183  
AGGGACTG -0.64077279525  
AGGGAGAA -1.29485017501  
AGGGAGAC -1.28017621233  
AGGGAGAG -1.36632366494  
AGGGAGAT 3.63019669808  
AGGGAGCA -1.00995652263  
AGGGAGCC -1.48361917795  
AGGGAGCG -0.974853235959  
AGGGAGGA -0.808404130079  
AGGGAGGC -1.68678429494  
AGGGAGGG 0.059417263917  
AGGGAGTA -0.193748583688  
AGGGAGTC -0.949719566038  
AGGGAGTG -1.38408611254  
AGGGATAA 0.802416400527  
AGGGATAC 2.58798594814  
AGGGATAG 0.210601423334



AGGGATAT 5.32682201003  
AGGGATCA 1.17228677736  
AGGGATCC 1.59359705186  
AGGGATCG 1.23188491734  
AGGGATGA 0.606075434191  
AGGGATGC -1.06820933155  
AGGGATGG -1.0669220272  
AGGGATTA 1.46273139064  
AGGGATTC 4.31346648115  
AGGGATTG 2.23284651518  
AGGGCAAA 1.55890831639  
AGGGCAAC -0.834672980262  
AGGGCAAG -0.724961192817  
AGGGCAAT 1.10593140041  
AGGGCACA -1.63106401229  
AGGGCACC -1.85507718658  
AGGGCACG -1.10368560976  
AGGGCACT -0.604720954772  
AGGGCAGA -0.717874353663  
AGGGCAGC -0.954791153103  
AGGGCAGG -0.0298011610427  
AGGGCATA -0.186366644714  
AGGGCATC -0.268516527231  
AGGGCATG -1.20801920953  
AGGGCCAA -1.54457911604  
AGGGCCAC -0.881846346178  
AGGGCCAG -0.876347661588  
AGGGCCAT -1.42987494015  
AGGGCCCA -1.09512379427  
AGGGCCCC -1.60798349479  
AGGGCCCG -0.710871940763  
AGGGCCCT -1.21333544977  
AGGGCCGA -0.807925801762  
AGGGCCGC -2.01340307529  
AGGGCCGG -0.528383414757  
AGGGCCTA -0.861271694017  
AGGGCCTC -0.987112294093  
AGGGCCTG -0.892635655609  
AGGGCGAA -0.600588250391  
AGGGCGAC -1.38369404014  
AGGGCGAG -1.4850599133  
AGGGCGAT 2.3595271957  
AGGGCGCA -0.654491146822  
AGGGCGCC -0.728000537991  
AGGGCGCG -0.368915549868  
AGGGCGGA 1.72938792645  
AGGGCGGC -0.896762609595  
AGGGCGGG -0.634439519231  
AGGGCGTA -1.18287926645  
AGGGCGTC -1.54464393867  
AGGGCGTG -1.17584078289  
AGGGCTAA -0.987112294093  
AGGGCTAC -0.646893829415  
AGGGCTAG -0.91698047588

AGGGCTAT -0.030094431191  
AGGGCTCA -1.29776170458  
AGGGCTCC -1.45678626629  
AGGGCTCG -1.44001759152  
AGGGCTGA -1.34047929847  
AGGGCTGC -0.680465681331  
AGGGCTGG -1.24868129856  
AGGGCTTA -0.974523372387  
AGGGCTTC -1.37615030596  
AGGGCTTG -1.60476641013  
AGGGGAAA -0.166290970016  
AGGGGAAC -0.0549627987943  
AGGGGAAG -0.827477406365  
AGGGGAAT 2.64478390711  
AGGGGACA -0.706024880487  
AGGGGACC -1.40437376771  
AGGGGACG -1.0878511128  
AGGGGACT -1.19895266618  
AGGGGAGA 0.243971488659  
AGGGGAGC -1.52939598201  
AGGGGAGG -0.157620942547  
AGGGGATA 1.00680426061  
AGGGGATC 5.29263329755  
AGGGGATG -0.475557149111  
AGGGGCAA -0.402928875296  
AGGGGCAC -0.82910502955  
AGGGGCAG -0.683959307714  
AGGGGCAT -0.540016986737  
AGGGGCCA -0.646920228956  
AGGGGCCC -1.49659625132  
AGGGGCCG -1.10222788461  
AGGGGCGA -0.814992775915  
AGGGGCGC -1.29643074951  
AGGGGCGG -0.849755743754  
AGGGGCTA -1.21525399066  
AGGGGCTC -2.02605655825  
AGGGGCTG -0.999641359413  
AGGGGGAA 0.435508784063  
AGGGGGAC -1.66229336236  
AGGGGGAG -0.862698053375  
AGGGGGAT 1.09259388182  
AGGGGGCA -0.596304990212  
AGGGGGCC -1.6166898543  
AGGGGGCG -1.76345953997  
AGGGGGGA -0.907209247757  
AGGGGGGC -1.51019567427  
AGGGGGGG -1.88872248673  
AGGGGGTA -0.369659441884  
AGGGGGTC -1.1898937029  
AGGGGGTG -0.630533694073  
AGGGGTAA 1.68026021036  
AGGGGTAC -0.635446883893  
AGGGGTAG -0.529407507842  
AGGGGTAT -0.00372573323892

AGGGGTCA -1.50300375972  
AGGGGTCC -1.03286243723  
AGGGGTCCG -0.953397205063  
AGGGGTGA -0.70074157433  
AGGGGTGC -1.15532964646  
AGGGGTGG -0.329300032739  
AGGGGTTA 1.01920420342  
AGGGGTTC -0.701172331197  
AGGGGTTG -0.207209213009  
AGGGTAAA 1.3834107025  
AGGGTAAC -0.039755879045  
AGGGTAAG -1.01212808091  
AGGGTAAT 1.77967539268  
AGGGTACA 0.311925475432  
AGGGTACC -0.962420359065  
AGGGTACG -1.10117556231  
AGGGTACT -0.473579274591  
AGGGTAGA -0.472189508656  
AGGGTAGC -1.66212869195  
AGGGTAGG -0.28613416942  
AGGGTATA 0.554394542689  
AGGGTATC 4.78361930442  
AGGGTATG 0.593549766831  
AGGGTCAA -0.234006576775  
AGGGTCAC -0.38619078217  
AGGGTCAG -0.417722027982  
AGGGTCAT -0.966899132676  
AGGGTCCA -1.4592584134  
AGGGTCCC -1.09911535259  
AGGGTCCG -1.64183293395  
AGGGTCGA -1.12479557142  
AGGGTCGC -1.1770619577  
AGGGTCGG -0.499164611906  
AGGGTCTA -1.273543393  
AGGGTCTC -0.624343916549  
AGGGTCTG -1.20371294777  
AGGGTGAA -1.16877668393  
AGGGTGAC -1.17651932951  
AGGGTGAG -1.03159003163  
AGGGTGAT -0.0714308847341  
AGGGTGCA -0.597197085592  
AGGGTGCC -1.11142119803  
AGGGTGCG -0.173708456886  
AGGGTGGA -0.177684593692  
AGGGTGGC -1.22421389032  
AGGGTGGG 0.0781578014338  
AGGGTGTA -0.305155692151  
AGGGTGTC -0.829672750372  
AGGGTGTTG -1.12548195949  
AGGGTTAA -0.390773847036  
AGGGTTAC -0.465353595832  
AGGGTTAG -0.728314195903  
AGGGTTAT 0.0801871681285  
AGGGTTCA -0.874750097286

AGGGTTCC -0.546817874428  
AGGGTTCCG -1.61126409517  
AGGGTTGA 4.07755286431E-5  
AGGGTTGC -0.276857998036  
AGGGTTGG -0.0304274313416  
AGGGTTTA -0.117982423838  
AGGGTTTC -0.219232766326  
AGGGTTTG -0.275697463759  
AGGTAAAA 0.844601298723  
AGGTAAAC -0.316642629056  
AGGTAAAG -0.0374410836497  
AGGTAAAT 2.25383833237  
AGGTAACA -0.749852039238  
AGGTAACC -0.540374556757  
AGGTAACG -0.513466367196  
AGGTAACT 1.1377086063  
AGGTAAGA 0.171449074389  
AGGTAAGC -0.31595127474  
AGGTAAGG -0.865673360057  
AGGTAATA 2.39778091472  
AGGTAATC 8.24342238699  
AGGTAATG 0.471804232187  
AGGTACAA -0.596989287225  
AGGTACAC -0.218255721928  
AGGTACAG -0.474173394953  
AGGTACAT 0.0344788460465  
AGGTACCA -0.0401497811069  
AGGTACCC -0.210693168273  
AGGTACCG -0.731802594655  
AGGTACCT -0.467933693545  
AGGTACGA 0.395013456489  
AGGTACGC -0.879359300312  
AGGTACGG -0.701541140625  
AGGTACTA -0.595760793734  
AGGTACTC -0.894002419964  
AGGTACTG -0.384412341805  
AGGTAGAA 0.889090537052  
AGGTAGAC -0.334390177898  
AGGTAGAG -0.66968133815  
AGGTAGAT 3.47697637604  
AGGTAGCA -0.173109893036  
AGGTAGCC -1.56003356415  
AGGTAGCG -0.785498476864  
AGGTAGGA -0.244656831198  
AGGTAGGC -0.98342524533  
AGGTAGGG 0.510433556562  
AGGTAGTA -0.305508034539  
AGGTAGTC 0.125148200234  
AGGTAGTG -0.483843991163  
AGGTATAA -0.213180214139  
AGGTATAC -0.15381836312  
AGGTATAG -0.54368103392  
AGGTATAT 1.16739319116  
AGGTATCA 2.19115249162

AGGTATCC 2.40620184553  
AGGTATCG 0.850592687618  
AGGTATGA 1.4492908877  
AGGTATGC -0.22531746845  
AGGTATGG -0.510221053326  
AGGTATTA 1.2389730634  
AGGTATTC 0.110157181681  
AGGTATTG 1.8261059121  
AGGTCAAA 0.225159332586  
AGGTCAAC -1.72044658489  
AGGTCAAG -0.493738330017  
AGGTCAAT 0.381883213503  
AGGTCACA -0.856351969657  
AGGTCACC -1.28248499595  
AGGTCACG -0.497532806615  
AGGTCACT -0.764649896793  
AGGTCAGA -1.03196746665  
AGGTCAGC -0.561485563949  
AGGTCAGG -1.15461293812  
AGGTCATA 0.256909354792  
AGGTCATC -1.01658097775  
AGGTCATG -0.387096208011  
AGGTCCAA -0.242738813062  
AGGTCCAC -1.03897615271  
AGGTCCAG -0.795322504069  
AGGTCCAT -0.699047298838  
AGGTCCCA -1.15357917392  
AGGTCCCC -1.43522489861  
AGGTCCCG -0.599880429035  
AGGTCCGA -0.264642067865  
AGGTCCGC -0.721473839592  
AGGTCCGG -1.46153975196  
AGGTCCTA -0.861725452464  
AGGTCCTC -1.22309700677  
AGGTCCTG -1.09085621699  
AGGTCGAA -0.127077980541  
AGGTCGAC -0.144967459588  
AGGTCGAG -0.0485929293519  
AGGTCGAT -0.106594550556  
AGGTCGCA -0.819203633393  
AGGTCGCC -1.36662137858  
AGGTCGCG -0.352577631962  
AGGTCGGA -0.932136948982  
AGGTCGGC -1.14490261191  
AGGTCGGG -1.04716523805  
AGGTCGTA -0.136678003721  
AGGTCGTC -0.402184460516  
AGGTCGTG -0.129281427377  
AGGTCTAA 1.04903228677  
AGGTCTAC -0.900479455859  
AGGTCTAG -0.369375320092  
AGGTCTAT -0.960348648552  
AGGTCTCA -0.577044826087  
AGGTCTCC -1.103378225

AGGTCTCG -1.39457849248  
AGGTCTGA -0.382085261475  
AGGTCTGC -0.886921069823  
AGGTCTGG 0.708556099842  
AGGTCTTA -0.927235521334  
AGGTCTTC -0.921854719842  
AGGTCTTG -0.285896050788  
AGGTGAAA 0.146393034801  
AGGTGAAC -0.539186577413  
AGGTGAAG -0.311251633683  
AGGTGAAT 1.13216600961  
AGGTGACA 0.389595016048  
AGGTGACC -1.3453681798  
AGGTGACG -1.21718873722  
AGGTGACT -0.833349866634  
AGGTGAGA -0.898027173746  
AGGTGAGC -0.25308795589  
AGGTGAGG -0.217845875589  
AGGTGATA 1.59921989271  
AGGTGATC 1.9592965626  
AGGTGATG -0.247125318971  
AGGTGCAA 0.99265645908  
AGGTGCAC -0.74821579046  
AGGTGCAG -0.790185310223  
AGGTGCAT -0.108991419772  
AGGTGCCA -0.772462854015  
AGGTGCCC -1.33351138794  
AGGTGCCG -0.510671936576  
AGGTGCGA 0.259928312201  
AGGTGCGC -0.124730773828  
AGGTGCGG -0.763188773683  
AGGTGCTA 0.187556453729  
AGGTGCTC -1.05701252821  
AGGTGCTG -0.486202698666  
AGGTGGAA -0.613232584994  
AGGTGGAC -1.10095757006  
AGGTGGAG -1.44678920447  
AGGTGGAT 2.51533336584  
AGGTGGCA -0.192761606789  
AGGTGGCC -1.0211614288  
AGGTGGCG -1.13470768423  
AGGTGGGA -1.06993366592  
AGGTGGGC -0.998268060519  
AGGTGGGG -0.56674011813  
AGGTGGTA 0.0448818334822  
AGGTGGTC -1.55018261465  
AGGTGGTG 0.292855597107  
AGGTGTAA 1.25809129732  
AGGTGTAC -0.784837442813  
AGGTGTAG -1.02902953754  
AGGTGTAT 0.902487912027  
AGGTGTCA -1.16808167027  
AGGTGTCC -0.424097386438  
AGGTGTCC -0.424097386438  
AGGTGTCCG -1.04309918597

AGGTGTGA 0.411916742782  
AGGTGTGC -0.407043805728  
AGGTGTGG 0.508355311509  
AGGTGTTA 0.380312832887  
AGGTGTTC 0.499339476192  
AGGTGTTG 0.952447867115  
AGGTTAAA 0.153496863759  
AGGTTAAC -0.507093361174  
AGGTTAAG -0.564017044686  
AGGTTAAT -0.017724808643  
AGGTTACA 0.63354559418  
AGGTTACC -0.565651463792  
AGGTTACG 0.069150068946  
AGGTTACT 0.10040764823  
AGGTTAGA 1.04502217036  
AGGTTAGC -1.05940260151  
AGGTTAGG 0.483572677069  
AGGTTATA 0.0718637326535  
AGGTTATC 0.585218489909  
AGGTTATG -0.844927502953  
AGGTTCAA -0.466823867297  
AGGTTCAC -0.629014805632  
AGGTTCAG -0.755898579648  
AGGTTCAT -0.802767436007  
AGGTTCCA -1.32055705477  
AGGTTCCC -0.724251803171  
AGGTTCCG -0.940410199191  
AGGTTCGA -0.633372559564  
AGGTTCGC -0.886921069823  
AGGTTCGG -0.292578271235  
AGGTTCTA -0.0368866932891  
AGGTTCTC -0.695565173245  
AGGTTCTG -0.537419115076  
AGGTTGAA -0.253550862693  
AGGTTGAC -0.714298653459  
AGGTTGAG -0.321803608627  
AGGTTGAT 0.0533343914646  
AGGTTGCA 0.270026528699  
AGGTTGCC -1.09790123509  
AGGTTGCG -0.551417406335  
AGGTTGGA -0.0957367591474  
AGGTTGGC -0.970412624061  
AGGTTGGG -0.927903351306  
AGGTTGTA 0.977001269897  
AGGTTGTC -0.338975595199  
AGGTTGTG -0.303503237714  
AGGTTTAA -0.747412826204  
AGGTTTAC 0.248639763925  
AGGTTTAG 0.478210172289  
AGGTTTAT 0.31418172135  
AGGTTTCA -0.533262102207  
AGGTTTCC -0.185315367943  
AGGTTTCG -0.0482588836749  
AGGTTTGA -0.59910072774

AGGTTTGC 0.676097994897  
AGGTTTGG -0.306888129355  
AGGTTTTA -0.54773663073  
AGGTTTTTC -0.289719802125  
AGGTTTTTG -0.757330166638  
AGTAAAAA 1.71863730149  
AGTAAAAC 0.793276670334  
AGTAAAAG 0.628828440555  
AGTAAAAT 3.15706543154  
AGTAAACA 0.139793410938  
AGTAAACC -0.125796426586  
AGTAAACG 1.4502679321  
AGTAAACT -0.512708883337  
AGTAAAGA 0.705025618653  
AGTAAAGC -0.303000339528  
AGTAAAGG -0.464098180036  
AGTAAATA 2.41664221054  
AGTAAATC 4.06048987382  
AGTAAATG 1.55390625683  
AGTAACAA -0.146810722588  
AGTAACAC -0.208957071727  
AGTAACAG -0.0286327853181  
AGTAACAT 0.370483316668  
AGTAACCA 1.0831449372  
AGTAACCC -0.82923624311  
AGTAACCG -0.385028679603  
AGTAACGA 1.18126262129  
AGTAACGC -0.581905739588  
AGTAACGG -0.15735903819  
AGTAACTA 0.334164344201  
AGTAACTC -0.51605979537  
AGTAACTG 0.147449539204  
AGTAAGAA 1.6006415472  
AGTAAGAC 0.120737385837  
AGTAAGAG 0.776770684063  
AGTAAGAT 2.17968463557  
AGTAAGCA 0.864128856219  
AGTAAGCC -1.29792010183  
AGTAAGCG 0.0898496615088  
AGTAAGGA 0.699144532791  
AGTAAGGC -0.254115708317  
AGTAAGGG -1.26578192796  
AGTAAGTA 2.50562983555  
AGTAAGTC 0.522728162593  
AGTAAGTG 0.73660678835  
AGTAATAA 0.695329407047  
AGTAATAC 0.233371942265  
AGTAATAG 0.297363645456  
AGTAATAT 3.69757852054  
AGTAATCA 3.96465274414  
AGTAATCC 7.06998657615  
AGTAATCG 2.64669460656  
AGTAATGA 0.438095939079  
AGTAATGC 0.898861503793



AGTAATGG 0.838895338529  
AGTAATTA 1.78297794911  
AGTAATTC 0.847753560745  
AGTAATTG 1.86675676172  
AGTACAAA 1.77369681148  
AGTACAAC 0.551319649619  
AGTACAAG -0.00833676593626  
AGTACAAT 1.91482928032  
AGTACACA 0.751710985133  
AGTACACC -0.382375133662  
AGTACACG 0.0863113388727  
AGTACACT 0.206322606642  
AGTACAGA 0.391709593142  
AGTACAGC 0.0445253089882  
AGTACAGG 0.0914725798251  
AGTACATA 0.797250454706  
AGTACATC 1.27447757082  
AGTACATG 0.0144381964818  
AGTACCAA -0.322860635792  
AGTACCAC -0.514116684601  
AGTACCAG -0.120574806486  
AGTACCAT 0.57588925806  
AGTACCCA 0.175438280275  
AGTACCCC -0.668694622633  
AGTACCCG -0.340112866514  
AGTACCGA -0.195090516791  
AGTACCGC -0.431912173331  
AGTACCGG -0.102073694509  
AGTACCTA 0.367363727345  
AGTACCTC -0.277727353217  
AGTACCTG -1.14536212075  
AGTACGAA 1.99847191312  
AGTACGAC -0.394790236608  
AGTACGAG 0.554544575724  
AGTACGAT 2.34404216593  
AGTACGCA -0.641152321324  
AGTACGCC -0.691034384697  
AGTACGCG -0.154899437392  
AGTACGGA -0.51712414122  
AGTACGGC -0.068633317535  
AGTACGGG -0.360481288597  
AGTACGTA 0.348534058705  
AGTACGTC -1.17815610105  
AGTACGTG 0.283625428882  
AGTACTAA -0.0499897525895  
AGTACTAC 0.65549929563  
AGTACTAG -1.13575582442  
AGTACTAT 1.31579180693  
AGTACTCA 0.224877563227  
AGTACTCC -0.423220189809  
AGTACTCG 0.020138929044  
AGTACTGA 0.778729216346  
AGTACTGC 0.350713197053  
AGTACTGG -0.088573335186

AGTACTTA 0.252596558493  
AGTACTTC 0.507078201042  
AGTACTTG 0.0663775943799  
AGTAGAAA 1.75242557737  
AGTAGAAC -0.061580980751  
AGTAGAAG -0.385165382177  
AGTAGAAT 3.56681715058  
AGTAGACA -0.442726575396  
AGTAGACC -1.17701412486  
AGTAGACG -0.948250862862  
AGTAGACT 0.280280005863  
AGTAGAGA 0.129923380572  
AGTAGAGC -0.829634065896  
AGTAGAGG -0.757477063094  
AGTAGATA 2.63243284265  
AGTAGATC 2.27131691955  
AGTAGATG 1.31240325594  
AGTAGCAA 0.376173332585  
AGTAGCAC 0.712469243683  
AGTAGCAG -0.426514120655  
AGTAGCAT 0.246000071209  
AGTAGCCA -1.03353000582  
AGTAGCCC -1.51272767777  
AGTAGCCG -0.639776408614  
AGTAGCGA -0.0423495686009  
AGTAGCGC -0.607335293473  
AGTAGCGG -1.26178174404  
AGTAGCTA -0.171784688356  
AGTAGCTC -0.264642067865  
AGTAGCTG -0.7967804906  
AGTAGGAA 0.753519223  
AGTAGGAC -1.17452289689  
AGTAGGAG -0.283398288277  
AGTAGGAT 3.11852367  
AGTAGGCA -0.804728059343  
AGTAGGCC -1.12888906856  
AGTAGGCG -0.997552397715  
AGTAGGGA -1.08251762138  
AGTAGGGC -0.562198874319  
AGTAGGGG -0.234302983502  
AGTAGGTA 1.82669271378  
AGTAGGTC -0.558350814494  
AGTAGGTG 0.0616149603582  
AGTAGTAA 2.94769485413  
AGTAGTAC -0.141417636162  
AGTAGTAG -0.639049506402  
AGTAGTAT 1.44582209257  
AGTAGTCA 0.278467585891  
AGTAGTCC -0.596599305887  
AGTAGTCG -0.253622742631  
AGTAGTGA 1.19148028918  
AGTAGTGC -0.0630455018214  
AGTAGTGG 0.0111210026741  
AGTAGTTA 1.93778930091

AGTAGTTC -0.708056599616  
AGTAGTTG 0.0659209607355  
AGTATAAA 1.20102516084  
AGTATAAC 0.130107654596  
AGTATAAG 1.36127795465  
AGTATAAT 3.54624197566  
AGTATACA 1.57064252029  
AGTATACC 0.397620215124  
AGTATACG 0.505991376374  
AGTATACT 3.03518502399  
AGTATAGA 1.59549990986  
AGTATAGC -0.214086685506  
AGTATAGG 0.787480794872  
AGTATATA 2.63364905121  
AGTATATC 2.18943782836  
AGTATATG 1.01974526332  
AGTATCAA 1.85983825232  
AGTATCAC 2.04263546998  
AGTATCAG 2.30853582884  
AGTATCAT 1.00256569669  
AGTATCCA 2.26125712614  
AGTATCCC 2.40659208825  
AGTATCCG 4.01652366006  
AGTATCGA 1.62400566373  
AGTATCGC 1.57197269122  
AGTATCGG 2.18919422072  
AGTATCTA 4.39939594151  
AGTATCTC 3.77214101815  
AGTATCTG 4.06643630508  
AGTATGAA -0.160389757771  
AGTATGAC -0.0962945474687  
AGTATGAG -0.0669089831603  
AGTATGAT 1.09528506671  
AGTATGCA -0.0511471502871  
AGTATGCC -1.18193594028  
AGTATGCG 0.673954665828  
AGTATGGA -0.527981409866  
AGTATGGC -0.72827760248  
AGTATGGG 0.0637005240956  
AGTATGTA -0.209391226554  
AGTATGTC -0.437702298398  
AGTATGTG 1.70130717906  
AGTATTAA 0.727456341512  
AGTATTAC 0.0885929388055  
AGTATTAG 0.937930733391  
AGTATTAT 2.14147535141  
AGTATTCA 1.99904433881  
AGTATTCC 0.0942975920916  
AGTATTCCG 1.11375847224  
AGTATTGA 1.65448955349  
AGTATTGC 0.957912833479  
AGTATTGG -0.14109744371  
AGTATTTA 1.42625480507  
AGTATTTTC 0.676460531168

AGTATTTG 1.77986750815  
AGTCAAAA 0.770609919896  
AGTCAAAC 0.898249870864  
AGTCAAAG -0.45716032839  
AGTCAAAT 1.08690517281  
AGTCAACA -0.281325270856  
AGTCAACC -0.773146366883  
AGTCAACG -0.447254750128  
AGTCAACT -0.591508637965  
AGTCAAGA -0.582462221001  
AGTCAAGC -1.3667390003  
AGTCAAGG -0.964686798866  
AGTCAATA 1.36107982741  
AGTCAATC 0.184329959335  
AGTCAATG -1.39353375025  
AGTCACAA 0.283506500257  
AGTCACAC 0.219634248454  
AGTCACAG -0.179854060921  
AGTCACAT 0.300435663329  
AGTCACCA -0.772102147415  
AGTCACCC -1.00651569533  
AGTCACCG 0.0789053527922  
AGTCACGA 0.729111671146  
AGTCACGC -0.630783836259  
AGTCACGG -0.0375694220123  
AGTCACTA -0.216230014576  
AGTCACTC -0.592931599362  
AGTCACTG -0.766345740574  
AGTCAGAA -0.0345454983529  
AGTCAGAC -0.840689984553  
AGTCAGAG -1.15416153211  
AGTCAGAT 2.99329496423  
AGTCAGCA -0.438206503493  
AGTCAGCC -0.798496722145  
AGTCAGCG -0.503197991281  
AGTCAGGA 1.49349574286  
AGTCAGGC 0.509763112774  
AGTCAGGG -0.358190278927  
AGTCAGTA 0.246451999985  
AGTCAGTC -0.566638179309  
AGTCAGTG -0.252554214675  
AGTCATAA 1.09945305761  
AGTCATAC 0.216065866935  
AGTCATAG -0.0421835912888  
AGTCATAT 1.08249279013  
AGTCATCA -0.346880558742  
AGTCATCC -0.399306387786  
AGTCATCG 0.273989073661  
AGTCATGA -0.334653650544  
AGTCATGC -0.339628003657  
AGTCATGG -0.0362915273999  
AGTCATTA 0.0725062086112  
AGTCATTC -0.394099143673  
AGTCATTG -0.805398764513

AGTCCAAA 0.0713702442043  
AGTCCAAC -0.958770165107  
AGTCCAAG 0.640163253373  
AGTCCAAT 0.598866791214  
AGTCCACA -0.617140239822  
AGTCCACC -0.707975048558  
AGTCCACG -0.802775800218  
AGTCCACT -0.714440322283  
AGTCCAGA 0.446215235529  
AGTCCAGC -0.694928709064  
AGTCCAGG -0.600092148126  
AGTCCATA -0.261551230518  
AGTCCATC -1.11860239594  
AGTCCATG -0.352273122405  
AGTCCCAA 0.649043954406  
AGTCCCAC -1.13609509773  
AGTCCCAG -1.15536519435  
AGTCCCAT -0.512512324378  
AGTCCCCA -0.734151892421  
AGTCCCCC -1.16347664935  
AGTCCCCG -1.83089416152  
AGTCCCCGA -0.277252684242  
AGTCCCCGC -0.748491025278  
AGTCCCCGG -1.4587855741  
AGTCCCTA -0.114610078514  
AGTCCCTC -1.32546135761  
AGTCCCTG -0.389249208199  
AGTCCGAA -1.02872293693  
AGTCCGAC -0.87680560214  
AGTCCGAG -1.3453681798  
AGTCCGAT 0.094911316074  
AGTCCGCA -0.790877971447  
AGTCCGCC -1.44306686919  
AGTCCGCG -1.42628198876  
AGTCCGGA -0.470357223683  
AGTCCGGC -0.971645038276  
AGTCCGGG -1.18728563736  
AGTCCGTA -0.128160623103  
AGTCCGTC -0.909452163214  
AGTCCGTG 0.447209531112  
AGTCCTAA 0.0501714127972  
AGTCCTAC -1.472888418  
AGTCCTAG -1.43318246284  
AGTCCTAT -0.294637696813  
AGTCCTCA -0.113536061545  
AGTCCTCC -1.58844678893  
AGTCCTCG -0.859652696424  
AGTCCTGA -0.24294661143  
AGTCCTGC -1.23686083874  
AGTCCTGG -1.3100905516  
AGTCCTTA -0.631066912525  
AGTCCTTC -0.49527211721  
AGTCCTTG -0.843772719071  
AGTCGAAA 0.283649998752

AGTCGAAC -0.378767544904  
AGTCGAAG -0.660643546779  
AGTCGAAT 0.616584542554  
AGTCGACA 0.927589432012  
AGTCGACC 0.121545054962  
AGTCGACG -0.70062186156  
AGTCGACT -0.270073838767  
AGTCGAGA 0.0662181516077  
AGTCGAGC -0.501022512275  
AGTCGAGG -0.596757703133  
AGTCGATA -0.00715924185591  
AGTCGATC 1.26044137923  
AGTCGATG -0.588980555189  
AGTCGCAA 1.21358846715  
AGTCGCAC -0.199437292697  
AGTCGCAG -0.465770238092  
AGTCGCAT -0.473677031307  
AGTCGCCA -0.998975881875  
AGTCGCCC -1.78790917426  
AGTCGCCG -1.09160455249  
AGTCGCGA -0.301923970124  
AGTCGCGC -0.327233027095  
AGTCGCGG -0.47433022391  
AGTCGCTA -0.0842166267795  
AGTCGCTC -1.00395676953  
AGTCGCTG -0.308375390624  
AGTCGGAA -0.469726509897  
AGTCGGAC -0.971408487933  
AGTCGGAG -0.381783888497  
AGTCGGAT 1.05933960854  
AGTCGGCA -0.951966402219  
AGTCGGCC -0.828221559762  
AGTCGGCG -0.979616915507  
AGTCGGGA 0.176537651258  
AGTCGGGC -1.15079101646  
AGTCGGGG -0.601343120434  
AGTCGGTA -0.376792284199  
AGTCGGTC -0.48484874201  
AGTCGGTG -1.09295720224  
AGTCGTAA 0.291169685826  
AGTCGTAC -0.373632964874  
AGTCGTAG -0.240193740483  
AGTCGTAT 1.10233923317  
AGTCGTCA -1.1461922687  
AGTCGTCC -0.649141711122  
AGTCGTCC -1.13366764686  
AGTCGTGA -0.264855355246  
AGTCGTGC 0.201770907567  
AGTCGTGG -0.23795474575  
AGTCGTTA 1.16047598866  
AGTCGTTC -0.167904739976  
AGTCGTTG -0.243537595213  
AGTCTAAA 0.864674620987  
AGTCTAAC -0.968944182266

AGTCTAAG 0.148696329406  
AGTCTAAT 0.180063166196  
AGTCTACA 0.124016940695  
AGTCTACC -0.972558044183  
AGTCTACG 0.27430534539  
AGTCTAGA -0.105629006949  
AGTCTAGC -0.17707086971  
AGTCTAGG -0.863647129942  
AGTCTATA 0.854147477294  
AGTCTATC 0.124060852803  
AGTCTATG -0.114546824168  
AGTCTCAA 0.11680202456  
AGTCTCAC -0.414680330374  
AGTCTCAG -0.704522197703  
AGTCTCAT -0.296982028329  
AGTCTCCA -0.534927364341  
AGTCTCCC -0.988828264256  
AGTCTCCG -0.999038613457  
AGTCTCGA 1.06203968041  
AGTCTCGC -0.898623646543  
AGTCTCGG -0.3963240238  
AGTCTCTA -0.544508045283  
AGTCTCTC -0.213028090051  
AGTCTCTG -0.15959907845  
AGTCTGAA -0.658060312486  
AGTCTGAC -0.584183680178  
AGTCTGAG -0.357477229939  
AGTCTGAT 2.21495233126  
AGTCTGCA -0.320535385133  
AGTCTGCC -0.815354789423  
AGTCTGCG -0.895338079908  
AGTCTGGA -0.52484326245  
AGTCTGGC -0.837616659772  
AGTCTGGG -1.35260322232  
AGTCTGTA 0.186247454707  
AGTCTGTC -0.198422086586  
AGTCTGTG -0.0566528921803  
AGTCTTAA -0.204029767301  
AGTCTTAC 0.207087931949  
AGTCTTAG 0.452397694369  
AGTCTTAT 0.747643364769  
AGTCTTCA -0.198341058292  
AGTCTTCC 0.933099878774  
AGTCTTCG 0.637887665217  
AGTCTTGA 0.348371740735  
AGTCTTGC 0.689026974056  
AGTCTTGG -0.991392679074  
AGTCTTTA -0.863734431394  
AGTCTTTC -0.68070824345  
AGTCTTTG -0.100403204743  
AGTGAAAA 0.656817443008  
AGTGAAAC 0.027285885965  
AGTGAAAG 0.629547239938  
AGTGAAAT 0.903353085102

AGTGAACA -0.439624760021  
AGTGAACC -0.536586353318  
AGTGAACG 1.78749514582  
AGTGAACT -0.624283537401  
AGTGAAGA 0.0121152982571  
AGTGAAGC -1.41896487242  
AGTGAAGG -0.976993689831  
AGTGAATA 0.520560263653  
AGTGAATC 1.1439370683  
AGTGAATG -0.197362445605  
AGTGACAA 0.458852774211  
AGTGACAC 0.356944272869  
AGTGACAG -0.309650148657  
AGTGACAT -0.28808721269  
AGTGACCA -1.03514377578  
AGTGACCC -1.1042530692  
AGTGACCG -1.25583348311  
AGTGACGA -0.433513396975  
AGTGACGC -0.188920865649  
AGTGACGG -0.545440132047  
AGTGACTA 0.0820346132339  
AGTGACTC -0.785082618748  
AGTGACTG -0.63958873663  
AGTGAGAA 0.181863039852  
AGTGAGAC -0.307264257468  
AGTGAGAG 0.422522823716  
AGTGAGAT 1.59432264716  
AGTGAGCA -0.27370834983  
AGTGAGCC -0.868630108647  
AGTGAGCG -0.511265534175  
AGTGAGGA -0.676807384543  
AGTGAGGC -0.394148283413  
AGTGAGGG -0.888144858445  
AGTGAGTA 0.0150357148054  
AGTGAGTC -0.912654087738  
AGTGAGTG -0.162058679248  
AGTGATAA 0.409199158351  
AGTGATAC 1.4351569394  
AGTGATAG 0.224001412125  
AGTGATAT 3.50599861994  
AGTGATCA 0.16000578821  
AGTGATCC 0.303404958235  
AGTGATCG 1.84224988486  
AGTGATGA 0.245855004424  
AGTGATGC 0.807501318054  
AGTGATGG -1.23776103695  
AGTGATTA 3.76759951296  
AGTGATTC 2.41250192609  
AGTGATTG 1.0412114881  
AGTGCAAA -0.050250088657  
AGTGCAAC -0.713965391927  
AGTGCAAG 0.512456650099  
AGTGCAAT 1.9878357733  
AGTGCACA 0.0092466352645



AGTGCACC -0.367128222529  
AGTGCACG -0.313698165401  
AGTGCACT -0.444644593531  
AGTGCAGA 0.962205503395  
AGTGCAGC -0.958552695621  
AGTGCAGG -1.10796024434  
AGTGCATA -0.287969852354  
AGTGCATC -0.139715519223  
AGTGCATG -0.505487432661  
AGTGCCAA -0.0652601880662  
AGTGCCAC -0.849943415739  
AGTGCCAG -1.39399116803  
AGTGCCAT -0.469216815789  
AGTGCCCA -1.41605203594  
AGTGCCCC -1.67711709669  
AGTGCCCG -0.701975034071  
AGTGCCGA -0.0774201825759  
AGTGCCGC -0.60427634468  
AGTGCCGG -0.928812697871  
AGTGCCTA -1.15808460845  
AGTGCCTC -1.33620100454  
AGTGCCTG -0.527092712447  
AGTGCGAA 0.122026519858  
AGTGCGAC -0.521985838866  
AGTGCGAG -0.387258787362  
AGTGCGAT 2.82618011943  
AGTGCGCA 3.27639527749  
AGTGCGCC 0.0902359835046  
AGTGCGCG 0.358647435335  
AGTGCGGA 0.652629064347  
AGTGCGGC -1.19419029354  
AGTGCGGG -0.50917709524  
AGTGCGTA 0.35482394538  
AGTGCGTC -0.730481049316  
AGTGCGTG 0.395670569816  
AGTGCTAA 0.748450511131  
AGTGCTAC -0.0864828051983  
AGTGCTAG -0.0841586000657  
AGTGCTAT 0.498901923404  
AGTGCTCA -0.853502387521  
AGTGCTCC -1.73109056615  
AGTGCTCG 0.357245645847  
AGTGCTGA -0.688515711659  
AGTGCTGC -1.33314728338  
AGTGCTGG 0.501156339651  
AGTGCTTA 0.611246084881  
AGTGCTTC -0.457989169425  
AGTGCTTG 0.0918233539241  
AGTGGA 1.49109364601  
AGTGGAAC -1.12584475714  
AGTGGAAG -0.0590889686351  
AGTGGAAT 1.74089028487  
AGTGGACA 0.33993355874  
AGTGGACC -1.07957707845

AGTGGACG -0.859793842485  
AGTGGAGA 0.479986521601  
AGTGGAGC -0.477721127327  
AGTGGAGG -1.23282510693  
AGTGGATA 3.73739660841  
AGTGGATC 2.7480322505  
AGTGGATG 0.505427837658  
AGTGGCAA -0.522928903657  
AGTGGCAC -0.832954396282  
AGTGGCAG -0.793332344614  
AGTGGCAT -0.0215409799134  
AGTGGCCA -0.446791581943  
AGTGGCCC -1.1781283946  
AGTGGCCG -1.07688275698  
AGTGGCGA 0.239911448362  
AGTGGCGC -0.554230395048  
AGTGGCGG -0.887924775143  
AGTGGCTA -0.854529094422  
AGTGGCTC -0.495429730311  
AGTGGCTG -0.180071791789  
AGTGGGAA -0.00439487011921  
AGTGGGAC -0.87229415583  
AGTGGGAG 0.397639034599  
AGTGGGAT 0.490248362976  
AGTGGGCA 0.122046907622  
AGTGGGCC -0.371626076996  
AGTGGGCG -0.463731200279  
AGTGGGGA -0.345953176847  
AGTGGGGC -1.26716594349  
AGTGGGGG -0.657909233925  
AGTGGGTA -0.589398242976  
AGTGGGTC -1.13829122588  
AGTGGGTG -1.07839929299  
AGTGGTAA 0.274859997132  
AGTGGTAC 0.0416464521134  
AGTGGTAG -0.402198836504  
AGTGGTAT 2.08554910006  
AGTGGTCA -0.762415084165  
AGTGGTCC -0.594698538936  
AGTGGTCG -0.732953196431  
AGTGGTGA 0.402904044044  
AGTGGTGC -1.3890398165  
AGTGGTGG 0.385561898055  
AGTGGTTA 0.756242819208  
AGTGGTTC -0.358330640843  
AGTGGTTG 0.245623420332  
AGTGTAAG 0.65501391001  
AGTGTAAC -0.411456188414  
AGTGTAAG 0.221469408625  
AGTGTAAT 5.32232311003  
AGTGTAACA 0.787928541542  
AGTGTAACC 0.710982505177  
AGTGTAACG -0.400810116096  
AGTGTAGA -0.188375885026

AGTGTAGC -0.00187044668568  
AGTGTAGG -0.385846281229  
AGTGTATA 1.06499120137  
AGTGTATC 2.12697180953  
AGTGTATG 0.427458492353  
AGTGTCAA 0.777720806157  
AGTGTCCAC -0.148448016892  
AGTGTCCAG 0.70696507008  
AGTGTCCAT 0.251621082385  
AGTGTCCA -0.304700888177  
AGTGTCCC -1.0525862923  
AGTGTCCG 0.0134658569526  
AGTGTCCA 0.360791809931  
AGTGTCCG 0.0890213432379  
AGTGTCCG 0.291344288731  
AGTGTCTA 0.112074938435  
AGTGTCTC 0.441147307806  
AGTGTCTG -0.776999131576  
AGTGTGAA -0.147021396153  
AGTGTGAC -0.245525663616  
AGTGTGAG 0.0210041021197  
AGTGTGAT 1.14636530331  
AGTGTGCA -0.180274362524  
AGTGTGCC -0.527282998247  
AGTGTGCG 0.0313273681693  
AGTGTGGA 0.111826364539  
AGTGTGGC -0.61539499492  
AGTGTGGG -0.429848827029  
AGTGTGTA 1.17569388643  
AGTGTGTC -0.0532366347485  
AGTGTGTG 0.076731442076  
AGTGTTAA -0.420689754599  
AGTGTTAC -0.0654483828138  
AGTGTTAG 0.206322606642  
AGTGTTAT 1.16892959217  
AGTGTTCA 0.0764342512038  
AGTGTTCC -0.732126185068  
AGTGTTCCG -0.589555071932  
AGTGTTGA 0.73783998671  
AGTGTTGC 1.97216908333  
AGTGTTGG -0.466006265672  
AGTGTTTA -0.351902744687  
AGTGTTTC 0.315419101815  
AGTGTTTG 0.572641068993  
AGTTAAAA 1.83152539807  
AGTTAAAC -0.31337980262  
AGTTAAAG 0.803814269291  
AGTTAAAT 2.32002930029  
AGTTAACA 0.564771914729  
AGTTAACC -1.12965570078  
AGTTAACG -0.584507793355  
AGTTAACT 0.500354420921  
AGTTAAGA 1.07129938475  
AGTTAAGC -0.668694622633

AGTTAAGG 0.181298194227  
AGTTAATA 1.66280880686  
AGTTAATC 0.641435136209  
AGTTAATG 0.634941894654  
AGTTACAA 0.306414244525  
AGTTACAC 1.30720254637  
AGTTACAG 0.155391357552  
AGTTACAT 1.41265120002  
AGTTACCA 1.15793745062  
AGTTACCC -0.0226115989219  
AGTTACCG 0.61197899887  
AGTTACGA 1.46734190058  
AGTTACGC 0.55126083876  
AGTTACGG -0.412298359909  
AGTTACTA 0.203091407379  
AGTTACTC 0.334164344201  
AGTTACTG -0.114970785113  
AGTTAGAA 0.256909354792  
AGTTAGAC -0.480235879641  
AGTTAGAG -0.185802583234  
AGTTAGAT 2.54527854814  
AGTTAGCA 0.143977868874  
AGTTAGCC -0.85810061252  
AGTTAGCG -0.43207266163  
AGTTAGGA 0.0913617540293  
AGTTAGGC -0.123306244142  
AGTTAGGG -0.766030514371  
AGTTAGTA 1.53503790372  
AGTTAGTC -1.02051006587  
AGTTAGTG -0.346273107918  
AGTTATAA 1.41760281293  
AGTTATAC 0.781865011328  
AGTTATAG 0.253498063611  
AGTTATAT 1.34873477473  
AGTTATCA 0.587138076334  
AGTTATCC 0.813376653521  
AGTTATCG 0.450045260024  
AGTTATGA 0.141370848857  
AGTTATGC 1.86916931384  
AGTTATGG -0.617621704718  
AGTTATTA 1.25055226801  
AGTTATTC 0.955240729445  
AGTTATTG 0.91834985405  
AGTTCAAA -0.155352673076  
AGTTCAAC -0.23997182751  
AGTTCAAG 0.164063737454  
AGTTCAAT 0.453638734176  
AGTTCACA 1.22672498329  
AGTTCACC -0.93306642193  
AGTTCACG -0.75942461735  
AGTTCAGA 0.628850919372  
AGTTCAGC 0.834897768433  
AGTTCAGG 0.0613459986981  
AGTTCATA 0.732848905175

AGTTCATC -0.276300209714  
AGTTCATG 0.519611448467  
AGTTCCAA 0.736190668853  
AGTTCCAC -1.19487406779  
AGTTCCAG -0.0202440044447  
AGTTCCAT -0.171437312217  
AGTTCCCA -0.535723009913  
AGTTCCCC -0.970231225235  
AGTTCCCG -0.60178198013  
AGTTCCGA -0.363685042793  
AGTTCCGC -0.250160482039  
AGTTCCGG -0.0100258137958  
AGTTCCTA -0.306691047633  
AGTTCCTC -0.387200237885  
AGTTCCTG -0.67492909641  
AGTTCCGAA 0.872238742932  
AGTTCCGAC -0.736610970456  
AGTTCCGAG 0.458882571712  
AGTTCCGAT 0.20067101382  
AGTTCCGCA 0.152736243321  
AGTTCCGCC -0.698429131369  
AGTTCCGCG -0.510241441091  
AGTTCCGGA -0.817559543167  
AGTTCCGGC -0.366001406478  
AGTTCCGGG 0.130504170474  
AGTTCCGTA -0.251541099617  
AGTTCCGTC -0.200574564012  
AGTTCCGTG 0.0887118674308  
AGTTCTAA 0.289159661369  
AGTTCTAC -0.020112529503  
AGTTCTAG 0.571238233979  
AGTTCTAT 0.143341666075  
AGTTCTCA -0.739731605305  
AGTTCTCC -0.791570632671  
AGTTCTCG -0.0621272682821  
AGTTCTGA 0.0964320341871  
AGTTCTGC 0.0982274643553  
AGTTCTGG 0.145875237864  
AGTTCTTA 0.139133422413  
AGTTCTTC -1.16062366926  
AGTTCTTG 0.0512982288484  
AGTTGAAA 2.08611002496  
AGTTGAAC 0.145309346713  
AGTTGAAG -0.123398250463  
AGTTGAAT 1.06109478595  
AGTTGACA -0.381253283861  
AGTTGACC -0.942691799124  
AGTTGACG -0.0119341608126  
AGTTGAGA 1.52487198939  
AGTTGAGC -0.627682020884  
AGTTGAGG -0.732773888658  
AGTTGATA 2.10811260477  
AGTTGATC 0.624085671534  
AGTTGATG 0.609867296973

AGTTGCAA 1.43621292104  
AGTTGCAC -0.18174960024  
AGTTGCAG -0.578661732627  
AGTTGCAT 0.139667947773  
AGTTGCCA -0.745211993183  
AGTTGCCC -0.356839720231  
AGTTGCCG -0.788669035597  
AGTTGCGA 0.196364490679  
AGTTGCGC -0.730580374322  
AGTTGCGG -0.128882559065  
AGTTGCTA -0.586211739965  
AGTTGCTC -0.35654435903  
AGTTGCTG 1.41500128193  
AGTTGGAA -0.0411456449796  
AGTTGGAC -0.918072005416  
AGTTGGAG -0.460143476521  
AGTTGGAT 4.16304712427  
AGTTGGCA -0.692041226597  
AGTTGGCC -1.05949042572  
AGTTGGCG -0.194787836905  
AGTTGGGA -0.25629563081  
AGTTGGGC -0.789674047826  
AGTTGGGG -0.94645804651  
AGTTGGTA 0.191604731855  
AGTTGGTC -0.843236102659  
AGTTGGTG -0.432157087885  
AGTTGTAA 0.336468161569  
AGTTGTAC 0.647618901956  
AGTTGTAG 0.46416770754  
AGTTGTAT 2.20000914554  
AGTTGTCA 1.01531850465  
AGTTGTCC -0.224351663461  
AGTTGTCCG 0.658607122781  
AGTTGTGA -0.788758166721  
AGTTGTGC 0.162286081235  
AGTTGTGG -0.389305928005  
AGTTGTTA 0.166468970881  
AGTTGTTC -0.39232906752  
AGTTGTTG 0.245425293084  
AGTTTAAA 1.25917498541  
AGTTTAAAC -0.259448415595  
AGTTTAAAG 0.420600100712  
AGTTTAAAT 0.460219799947  
AGTTTACA 0.274097285641  
AGTTTACC 0.202584327087  
AGTTTACG 0.665492698108  
AGTTTAGA 2.05169025116  
AGTTTAGC 0.515000938533  
AGTTTAGG -0.198830364636  
AGTTTATA 1.18655925791  
AGTTTATC 0.821935593812  
AGTTTATG 0.369560639642  
AGTTTCAA 0.626923491499  
AGTTTCAC -0.320505064869

AGTTTCAG 0.251161573543  
AGTTTCAT 0.631518579919  
AGTTTCCA 1.56021783818  
AGTTTCCC -0.0243733108645  
AGTTTCCG -0.216437551562  
AGTTTCGA 0.187360417534  
AGTTTCGC 0.404759853361  
AGTTTCGG -0.29391889743  
AGTTTCTA -0.411195852346  
AGTTTCTC -0.0321614368353  
AGTTTCTG 0.319881408386  
AGTTTGAA 0.224904746913  
AGTTTGAC 0.576906293842  
AGTTTGAG 0.00929525224096  
AGTTTGAT 1.58110196615  
AGTTTGCA 0.465657844007  
AGTTTGCC 0.364122856963  
AGTTTGCG 0.258160849864  
AGTTTGGA 1.00289399197  
AGTTTGGC -1.08223977274  
AGTTTGGG -0.705313922551  
AGTTTGTA -0.149778710587  
AGTTTGTC -0.482773894918  
AGTTTGTG 0.646170325163  
AGTTTTAA -0.400534881278  
AGTTTTAC 0.625833007489  
AGTTTTAG 0.158029481978  
AGTTTTAT 1.56538509091  
AGTTTTCA 0.142372201743  
AGTTTTCC 0.594331559179  
AGTTTTCG 0.713376237814  
AGTTTTGA 0.343295971564  
AGTTTTGC -0.119410612867  
AGTTTTGG 0.0674944779305  
AGTTTTTA 0.948883144937  
AGTTTTTC -0.556752204666  
AGTTTTTG 0.646590888148  
ATAAAAAA 1.80143567175  
ATAAAAAAC 1.01698716474  
ATAAAAAAG 1.09490946136  
ATAAAAAAT 3.49047961057  
ATAAAACA 1.19759295913  
ATAAAACC 1.08764435996  
ATAAAACG 1.32687490927  
ATAAAAGA 2.49369593612  
ATAAAAGC 1.08434154214  
ATAAAAGG 0.0833362935714  
ATAAAATA 2.61811252927  
ATAAAATC 8.69307139252  
ATAAAATG 1.12400881283  
ATAAACAA 0.58353284001  
ATAAACAC 1.68282828452  
ATAAACAG -0.0558687473987  
ATAAACAT 0.672604107132

ATAAACCA 0.140182608131  
ATAAACCC -0.384551135431  
ATAAACCG 0.168171871965  
ATAAACGA 1.07054163951  
ATAAACGC 0.134313545822  
ATAAACGG 0.937871661151  
ATAAACTA 0.987121181067  
ATAAACTC 0.332110407636  
ATAAACTG 0.789403256495  
ATAAAGAA 0.388604379807  
ATAAAGAC 0.260809168173  
ATAAAGAG 0.266470954877  
ATAAAGAT 4.65991706717  
ATAAAGCA -0.40488766896  
ATAAAGCC -0.437681126489  
ATAAAGCG 1.34343447877  
ATAAAGGA 0.58471533034  
ATAAAGGC -1.20261775889  
ATAAAGGG 0.12444900447  
ATAAAGTA 2.05484251318  
ATAAAGTC 0.127535921094  
ATAAAGTG 0.228764830291  
ATAAATAA 1.95636359973  
ATAAATAC 1.25437497382  
ATAAATAG 0.546374832626  
ATAAATAT 3.47928385276  
ATAAATCA 1.28092977546  
ATAAATCC 3.18207625211  
ATAAATCG 2.62364074998  
ATAAATGA 3.01964797929  
ATAAATGC 1.12886266902  
ATAAATGG -0.668532566044  
ATAAATTA 0.285514433661  
ATAAATTC 2.06104980327  
ATAAATTG 1.54581126887  
ATAACAAA 0.570652216446  
ATAACAAC 1.3310026474  
ATAACAAG -0.0380059292741  
ATAACAAT 2.04491628577  
ATAACACA 2.10899032417  
ATAACACC 0.534982777239  
ATAACACG 1.65843118793  
ATAACAGA 0.956553649191  
ATAACAGC 0.60467155365  
ATAACAGG 0.0304977429904  
ATAACATA 1.22853635774  
ATAACATC 1.87947898804  
ATAACATG 1.28107196705  
ATAACCAA 1.36785954319  
ATAACCAC -0.435874979676  
ATAACCAG 0.194791496247  
ATAACCAT 0.755652619569  
ATAACCCA 0.235388501261  
ATAACCCC -0.475027590002



ATAACCCG 1.1856689922  
ATAACCGA 0.0219654636219  
ATAACCGC 0.893051513725  
ATAACCGG -0.72892530607  
ATAACCTA -0.340048043878  
ATAACCTC 0.0759172384112  
ATAACCTG -0.22550121971  
ATAACGAA 2.42162048437  
ATAACGAC -0.0112381016281  
ATAACGAG 0.158849958802  
ATAACGAT 2.76609162758  
ATAACGCA 2.69896465217  
ATAACGCC 0.086732686002  
ATAACGCG 2.23239981404  
ATAACGGA 1.01686797474  
ATAACGGC 0.79546208184  
ATAACGGG 0.271930432228  
ATAACGTA 2.17608724069  
ATAACGTC 0.941443702013  
ATAACGTG 1.16918600751  
ATAACTAA 1.13748904577  
ATAACTAC -0.0606865329368  
ATAACTAG 0.452750298139  
ATAACTAT 1.02829610078  
ATAACTCA 0.874145260278  
ATAACTCC 1.18546067107  
ATAACTCG 1.28515161097  
ATAACTGA 0.70699303791  
ATAACTGC 0.726785113579  
ATAACTGG 0.20698311793  
ATAACTTA 2.29507206294  
ATAACTTC 0.164714839005  
ATAACTTG 1.57925112308  
ATAAGAAA 1.87947898804  
ATAAGAAC 0.0170922651859  
ATAAGAAG 0.381156572672  
ATAAGAAT 3.56931595862  
ATAAGACA -0.202363721022  
ATAAGACC -0.69802268299  
ATAAGACG -0.303713388516  
ATAAGAGA -0.307974431259  
ATAAGAGC 1.01956412588  
ATAAGAGG 0.339421250816  
ATAAGATA 3.52629751452  
ATAAGATC 4.82165607673  
ATAAGATG 0.0317931501695  
ATAAGCAA 0.70696507008  
ATAAGCAC -0.198905119772  
ATAAGCAG 0.10040764823  
ATAAGCAT 0.702554255683  
ATAAGCCA -0.492626412717  
ATAAGCCC -0.748608908377  
ATAAGCCG -0.246705017368  
ATAAGCGA 1.06334841805

ATAAGCGC 0.0199387107431  
ATAAGCGG -0.345953176847  
ATAAGCTA 0.198211935785  
ATAAGCTC -0.224900042044  
ATAAGCTG 0.254074932788  
ATAAGGAA 2.72043035419  
ATAAGGAC -0.528615521613  
ATAAGGAG 0.287731210959  
ATAAGGAT 2.11059102505  
ATAAGGCA 0.167690407069  
ATAAGGCC -0.504104985411  
ATAAGGCG 0.486371289794  
ATAAGGGA 0.476410560015  
ATAAGGGC -0.674621188892  
ATAAGGGG -0.00372573323892  
ATAAGGTA -0.145646528969  
ATAAGGTC -0.89055636503  
ATAAGGTG -0.194815543354  
ATAAGTAA 2.09826583737  
ATAAGTAC 1.12629799282  
ATAAGTAG 0.967376676848  
ATAAGTAT 1.23937271586  
ATAAGTCA -0.313320207616  
ATAAGTCC 0.24260394016  
ATAAGTCG 0.126535875115  
ATAAGTGA 0.412660373417  
ATAAGTGC 0.315920693094  
ATAAGTGG 1.74186915894  
ATAAGTTA 0.394752336277  
ATAAGTTC 0.775229316804  
ATAAGTTG 0.61369758285  
ATAATAAA 2.48544359644  
ATAATAAC 1.8525179994  
ATAATAAG 2.02354677218  
ATAATAAT 3.24794702758  
ATAATACA 2.52678423209  
ATAATACC 1.00990503046  
ATAATACG 1.58175542013  
ATAATAGA 0.819215918327  
ATAATAGC 0.491350870539  
ATAATAGG 1.40841289748  
ATAATATA 2.90779024896  
ATAATATC 6.4717549422  
ATAATATG 1.54089964734  
ATAATCAA 2.80601557499  
ATAATCAC 3.32714721881  
ATAATCAG 2.3176860143  
ATAATCAT 2.8184965461  
ATAATCCA 4.6131151245  
ATAATCCC 2.91873351215  
ATAATCCG 3.66877818962  
ATAATCGA 3.14699518287  
ATAATCGC 4.03170287336  
ATAATCGG 0.978431549979

ATAATCTA 7.07554459436  
ATAATCTC 5.32360231155  
ATAATCTG 6.14395889916  
ATAATGAA 0.359940751461  
ATAATGAC 1.09170361611  
ATAATGAG 0.653993999031  
ATAATGAT 1.63579345085  
ATAATGCA 2.68265339519  
ATAATGCC 0.0772168276958  
ATAATGCG 0.857883665797  
ATAATGGA 1.72489164027  
ATAATGGC -0.0478634133234  
ATAATGGG 0.81570530214  
ATAATGTA 1.8310379214  
ATAATGTC 1.40200277527  
ATAATGTG 1.09162520164  
ATAATTAA 1.44240348271  
ATAATTAC 2.3195988048  
ATAATTAG 0.771011924787  
ATAATTAT 4.00461694431  
ATAATTCA 1.97600067612  
ATAATTCC 2.34222425695  
ATAATTCG 1.65143687786  
ATAATTGA 1.35355177612  
ATAATTGC 1.64232537688  
ATAATTGG 1.08985277305  
ATAATTTA 2.82496469502  
ATAATTTT 2.44154037564  
ATAATTTG 1.78836188718  
ATACAAA 1.98865311355  
ATACAAAC 2.1516234918  
ATACAAAG 0.603890545448  
ATACAAAT 2.83642941449  
ATACAACA 1.41454673934  
ATACAACC 0.99804849998  
ATACAACG -0.185579624735  
ATACAAGA 1.53298736511  
ATACAAGC 0.238093016613  
ATACAAGG 1.09163931624  
ATACAATA 2.15108217051  
ATACAATC 4.31648282474  
ATACAATG -0.192014578194  
ATACACAA 1.89954891234  
ATACACAC 0.638167866285  
ATACACAG 0.734570887116  
ATACACAT 2.31867612778  
ATACACCA 1.99348736613  
ATACACCC 0.973021996512  
ATACACCG 0.616846969674  
ATACACGA 1.00557655126  
ATACACGC 0.645551112167  
ATACACGG 0.805305189902  
ATACACTA 2.10309773751  
ATACACTC 0.561427798617

ATACACTG -0.217031671924  
ATACAGAA 2.65383476756  
ATACAGAC -0.283597983815  
ATACAGAG 1.27715830045  
ATACAGAT 3.2481441093  
ATACAGCA 0.415398606994  
ATACAGCC -0.438903085441  
ATACAGCG 1.09294909941  
ATACAGGA 1.83873430243  
ATACAGGC 1.17262918724  
ATACAGGG -0.580283866798  
ATACAGTA 1.34754078361  
ATACAGTC -0.592931599362  
ATACAGTG 1.75090381373  
ATACATAA 1.0547377242  
ATACATAC 1.96489117423  
ATACATAG 2.90437712811  
ATACATAT 2.22220776155  
ATACATCA 1.32319465643  
ATACATCC 0.662561564914  
ATACATCG 1.05560864767  
ATACATGA 2.01193724731  
ATACATGC 0.962319727152  
ATACATGG -0.833051368854  
ATACATTA 0.858372710759  
ATACATTC 2.49000575078  
ATACATTG 1.1439370683  
ATACCAA 1.41824084541  
ATACCAAC 2.25808029425  
ATACCAAG -0.221114713802  
ATACCAAT 1.72853033344  
ATACCACA 0.718317918228  
ATACCACC 1.59278284819  
ATACCACG 0.771992105764  
ATACCAGA -0.00259133712156  
ATACCAGC 1.47865318905  
ATACCAGG 0.626946754461  
ATACCATA 1.02593477947  
ATACCATC 0.674943211016  
ATACCATG 1.42035908184  
ATACCCAA 1.50134032725  
ATACCCAC 1.24515918158  
ATACCCAG 1.57305637931  
ATACCCAT 2.41672585265  
ATACCCCA 0.282258141765  
ATACCCCG 0.309565199639  
ATACCCCG 0.0285282326806  
ATACCCGA 0.732860667347  
ATACCCGC 0.394700321339  
ATACCCGG 0.512605376225  
ATACCCTA 2.27269701436  
ATACCCTC 0.626371192191  
ATACCCTG 1.04599241883  
ATACCGAA 1.35412550872

ATACCGAC 1.2299739565  
ATACCGAG 0.901300716827  
ATACCGAT 3.83821933061  
ATACCGCA 1.43094399087  
ATACCGCC 1.58476679747  
ATACCGCG 0.179772509864  
ATACCGGA -0.228306105594  
ATACCGGC -0.824081013934  
ATACCGGG 1.89309644632  
ATACCGTA 2.53585678721  
ATACCGTC 0.457687012302  
ATACCGTG 1.25319771112  
ATACCTAA 1.839490218  
ATACCTAC 0.295688973584  
ATACCTAG 1.43060680861  
ATACCTAT 1.15347645095  
ATACCTCA 0.809776644828  
ATACCTCC -0.351756893757  
ATACCTCG 1.08893244846  
ATACCTGA 0.263560209448  
ATACCTGC 0.451794164268  
ATACCTGG 0.0944230552567  
ATACCTTA 1.89091443277  
ATACCTTC 1.43386205498  
ATACCTTG -0.375756690324  
ATACGAAA 2.1088747935  
ATACGAAC 2.09820990171  
ATACGAAG 1.34228126318  
ATACGAAT 4.48653089379  
ATACGACA 1.04681707776  
ATACGACC -0.146645529421  
ATACGACG 1.19935963732  
ATACGAGA 2.38596228458  
ATACGAGC -0.274938150229  
ATACGAGG 0.17435511495  
ATACGATA 3.67726760241  
ATACGATC 2.39701454389  
ATACGATG 0.525817170269  
ATACGCAA 8.61376508036  
ATACGCAC 2.39292052399  
ATACGCAG 1.66680820663  
ATACGCAT 1.10856220615  
ATACGCCA 0.670094582449  
ATACGCCC 1.04232549645  
ATACGCCG 0.624946662505  
ATACGCGA 2.8411410791  
ATACGCGC 2.02466391712  
ATACGCGG 1.39106186451  
ATACGCTA 1.05259570204  
ATACGCTC 1.61200249817  
ATACGCTG 1.36100193569  
ATACGGAA 1.559680699  
ATACGGAC 1.48064465541  
ATACGGAG 0.473580058735

ATACGGAT 6.2831500869  
ATACGGCA 0.849829714745  
ATACGGCC 1.17785472807  
ATACGGCG 2.53506689203  
ATACGGGA 1.87929445264  
ATACGGGC 0.00098854518799  
ATACGGGG 0.215743060667  
ATACGGTA 1.69799155354  
ATACGGTC 0.64890359249  
ATACGGTG 1.17136958934  
ATACGTAA 3.38741658672  
ATACGTAC 2.40173666377  
ATACGTAG 0.640523698591  
ATACGTAT 1.97529154785  
ATACGTCA 0.530282613418  
ATACGTCC 1.30338402267  
ATACGTCCG 2.23624264623  
ATACGTGA 1.41292643484  
ATACGTGC 0.421461353064  
ATACGTGG 0.982380764481  
ATACGTTA 2.62012464478  
ATACGTTC 1.16450936803  
ATACGTTG 0.53348401518  
ATACTAAA 2.03796118294  
ATACTAAC 0.700678058603  
ATACTAAG 0.538559000207  
ATACTAAT 1.53984915471  
ATACTACA 0.550905621174  
ATACTACC 0.745822057823  
ATACTACG 0.911896603879  
ATACTAGA 0.919718186694  
ATACTAGC 0.313195789978  
ATACTAGG 2.32345810404  
ATACTATA 1.19394773142  
ATACTATC 2.25962767329  
ATACTATG 0.728005242859  
ATACTCAA 1.4874484183  
ATACTCAC 1.14194324951  
ATACTCAG 1.48416389719  
ATACTCAT 3.10762850102  
ATACTCCA 0.768595713334  
ATACTCCC 1.41477963034  
ATACTCCG 0.620577930545  
ATACTCGA 2.30853582884  
ATACTCGC 1.12905556864  
ATACTCGG -0.0669089831603  
ATACTCTA 1.71694485567  
ATACTCTC 1.83920112995  
ATACTCTG 1.79081050996  
ATACTGAA 0.634374173832  
ATACTGAC 0.826678885595  
ATACTGAG 1.33681838786  
ATACTGAT 1.89628869972  
ATACTGCA 2.23761568374

ATACTGCC 0.980269846728  
ATACTGCG 1.57556642675  
ATACTGGA 0.135990047366  
ATACTGGC -0.0101988484109  
ATACTGGG 0.193118915428  
ATACTGTA 2.57304825144  
ATACTGTC 0.351379981499  
ATACTGTG 1.08829258631  
ATACTTAA 0.853031900652  
ATACTTAC 2.38249165977  
ATACTTAG 0.841592796578  
ATACTTCA -0.32341946964  
ATACTTCC 1.27142071308  
ATACTTCG 0.0175133509336  
ATACTTGA 1.21078358126  
ATACTTGC 1.59308160736  
ATACTTGG 0.668020780884  
ATACTTTA 1.25917498541  
ATACTTTC 1.01331736717  
ATACTTTG 1.2662741095  
ATAGAAAA 0.751924272514  
ATAGAAAC -0.277158064105  
ATAGAAAG 0.573671435237  
ATAGAAAT 2.66042602721  
ATAGAACA 0.323841339533  
ATAGAACC -0.751601204864  
ATAGAACG 0.681698095546  
ATAGAAGA 1.06502596512  
ATAGAAGC 0.547309533206  
ATAGAAGG -0.545382628096  
ATAGAATA 3.46037498549  
ATAGAATC 7.17503740701  
ATAGAATG 0.91149982662  
ATAGACAA 0.475933277225  
ATAGACAC 0.537859804443  
ATAGACAG -1.00795956726  
ATAGACAT 0.21798702165  
ATAGACCA -0.407914206435  
ATAGACCC -1.33860885178  
ATAGACCG -1.21414259613  
ATAGACGA -0.376585531358  
ATAGACGC -0.846623869497  
ATAGACGG -0.0607965745878  
ATAGACTA 0.451868396641  
ATAGACTC -0.127000611589  
ATAGACTG -0.560334962173  
ATAGAGAA 3.31399423563  
ATAGAGAC 0.811906643437  
ATAGAGAG 0.160084202688  
ATAGAGAT 2.83268120244  
ATAGAGCA 0.0128173692183  
ATAGAGCC -0.693275993246  
ATAGAGCG -0.444404645228  
ATAGAGGA 0.273878770629

ATAGAGGC -1.16501906214  
ATAGAGGG 0.294379974562  
ATAGAGTA 0.151495464895  
ATAGAGTC -0.433828623177  
ATAGAGTG -0.146810722588  
ATAGATAA 0.20283577618  
ATAGATAC 3.76281544565  
ATAGATAG 0.823805256352  
ATAGATAT 7.33479723514  
ATAGATCA 1.6127944844  
ATAGATCC 2.85821635449  
ATAGATCG 0.752298048193  
ATAGATGA 0.200352128275  
ATAGATGC -0.109985715355  
ATAGATGG -0.143030621978  
ATAGATTA 4.56433007967  
ATAGATTC 8.55557291197  
ATAGATTG 4.91171458213  
ATAGCAAA 0.76900346862  
ATAGCAAC 0.695946267609  
ATAGCAAG 0.241499080163  
ATAGCAAT 3.10450080887  
ATAGCACA 0.284543662422  
ATAGCACC -0.267458193157  
ATAGCACG -0.154899437392  
ATAGCAGA 0.788411836109  
ATAGCAGC -1.00645296375  
ATAGCAGG -0.615780532771  
ATAGCATA 1.48604871987  
ATAGCATC 1.10404840741  
ATAGCATG 0.15019090936  
ATAGCCAA -0.381889486661  
ATAGCCAC 1.27013889774  
ATAGCCAG -0.633733788927  
ATAGCCAT -0.0280551319957  
ATAGCCCA 0.210691338602  
ATAGCCCC -0.320024645499  
ATAGCCCG -0.554219678403  
ATAGCCGA 1.45916536156  
ATAGCCGC 0.116435044802  
ATAGCCGG -0.346546513065  
ATAGCCTA 0.57254697162  
ATAGCCTC 0.558941014133  
ATAGCCTG 0.00826227218201  
ATAGCGAA 1.24825524656  
ATAGCGAC -0.16456480597  
ATAGCGAG -0.246084758845  
ATAGCGAT 3.32502584579  
ATAGCGCA 1.10973973024  
ATAGCGCC 0.454778096544  
ATAGCGCG 0.399093100406  
ATAGCGGA 0.894484930386  
ATAGCGGC 0.61181171465  
ATAGCGGG -0.362114923559



ATAGCGTA 1.30130159551  
ATAGCGTC 0.314941296262  
ATAGCGTG 1.54508593495  
ATAGCTAA 0.183570907186  
ATAGCTAC 0.681949283257  
ATAGCTAG 1.52363304063  
ATAGCTAT 1.20256182323  
ATAGCTCA 0.492660392324  
ATAGCTCC 0.0298445503873  
ATAGCTCG 0.0301582082999  
ATAGCTGA 0.385175053296  
ATAGCTGC -0.226636661354  
ATAGCTGG 0.144409148504  
ATAGCTTA -0.564556013532  
ATAGCTTC -0.726123818147  
ATAGCTTG 0.291337492809  
ATAGGAAA 1.92975260104  
ATAGGAAC -0.178810625599  
ATAGGAAG -0.203921032558  
ATAGGAAT 2.82771756597  
ATAGGACA -0.153376366845  
ATAGGACC -0.469681290881  
ATAGGACG -0.758039294902  
ATAGGAGA 0.883735350957  
ATAGGAGC -0.28715747836  
ATAGGAGG -0.570580597889  
ATAGGATA 2.02171396445  
ATAGGATC 3.87736723606  
ATAGGATG 0.666730601336  
ATAGGCAA -0.221535015405  
ATAGGCAC -0.0722500546493  
ATAGGCAG -0.45126643483  
ATAGGCAT -0.592846388962  
ATAGGCCA -0.861700359831  
ATAGGCCC -0.159667037664  
ATAGGCCG -0.556164618843  
ATAGGCCG 0.643674130942  
ATAGGCCG -0.295016961506  
ATAGGCCG -0.0882330163508  
ATAGGCTA 0.686613899182  
ATAGGCTC -0.509825060212  
ATAGGCTG -0.192132461293  
ATAGGGAA 0.37572480177  
ATAGGGAC -0.498155940335  
ATAGGGAG 0.199800613112  
ATAGGGAT 1.78711405146  
ATAGGGCA -0.0906421705014  
ATAGGGCC -0.570403119787  
ATAGGGCG -0.434326032351  
ATAGGGGA -0.125519100715  
ATAGGGGC -0.946974013776  
ATAGGGGG -0.756123629201  
ATAGGGTA -0.810786361925  
ATAGGGTC 0.59944836526

ATAGGGTG 0.768461885957  
ATAGGTAA 1.25774235289  
ATAGGTAC -0.435089266605  
ATAGGTAG 0.0196483157923  
ATAGGTCA 1.00964391025  
ATAGGTCC -0.28811674881  
ATAGGTCCG -0.339403999631  
ATAGGTGA -0.140910817252  
ATAGGTGC -0.78750353507  
ATAGGTGG -0.584453948747  
ATAGGTTA 0.111514797679  
ATAGGTTC 0.744501558011  
ATAGGTTG 0.254546987947  
ATAGTAAA 1.75072894944  
ATAGTAAC 0.147449539204  
ATAGTAAG 0.502765404743  
ATAGTAAT 2.74160592263  
ATAGTACA 0.740691137136  
ATAGTACC -0.398729257227  
ATAGTACG -0.164895976449  
ATAGTAGA 1.58033481117  
ATAGTAGC 0.817108659918  
ATAGTAGG 2.32478278595  
ATAGTATA 1.25785108763  
ATAGTATC 2.33306596866  
ATAGTATG 0.599453592892  
ATAGTCAA 1.77954783846  
ATAGTCAC 0.221115759328  
ATAGTCAG -0.352050686669  
ATAGTCAT 0.63849668433  
ATAGTCCA 0.275045578064  
ATAGTCCC -0.820104092983  
ATAGTCCG -0.96190622147  
ATAGTCGA -0.725839957736  
ATAGTCGC -0.0218703207217  
ATAGTCGG 0.227813662671  
ATAGTCTA 0.291023834897  
ATAGTCTC -0.180274362524  
ATAGTCTG 1.30012799215  
ATAGTGAA 0.327296020059  
ATAGTGAC -0.0029517823395  
ATAGTGAG 1.35000561204  
ATAGTGAT 1.4006106569  
ATAGTGCA 0.528665184116  
ATAGTGCC -0.791013367113  
ATAGTGCG 1.19705399028  
ATAGTGGA 2.2911262464  
ATAGTGGC 0.0199345286376  
ATAGTGGG -0.126916446716  
ATAGTGTA 1.47229978665  
ATAGTGTC 0.469609410943  
ATAGTGTG 1.14636530331  
ATAGTTAA 1.50395884806  
ATAGTTAC 0.703089826569

ATAGTTAG 0.197671398649  
ATAGTTCA 0.55268589121  
ATAGTTCC 0.12759107261  
ATAGTTCG 0.522064776107  
ATAGTTGA 0.186025280352  
ATAGTTGC 0.508990207401  
ATAGTTGG -0.454982758332  
ATAGTTTA -0.129397480805  
ATAGTTTC 0.201766202698  
ATAGTTTG 1.28203306717  
ATATAAAA 2.27739116641  
ATATAAAC 1.00047020045  
ATATAAAG 1.70214856641  
ATATAAAT 4.8507794753  
ATATAACA 2.40915101406  
ATATAACC 0.100330279278  
ATATAACG 1.96921913066  
ATATAAGA 1.78896646281  
ATATAAGC -0.106653622797  
ATATAAGG 1.49068353829  
ATATAATA 2.86317868404  
ATATAATC 4.39946834421  
ATATAATG 1.23214368511  
ATATACAA 2.03369256013  
ATATACAC 1.35000561204  
ATATACAG 2.4655686628  
ATATACAT 1.16618482405  
ATATACCA 2.72331470008  
ATATACCC 0.735493825524  
ATATACCG 1.1401512173  
ATATACGA 3.34262100917  
ATATACGC 0.830107166581  
ATATACGG 0.627805654378  
ATATACTA 1.70459901885  
ATATACTC 2.56711750307  
ATATACTG 2.55660368984  
ATATAGAA 2.55119622743  
ATATAGAC 1.00519676381  
ATATAGAG 2.18568883216  
ATATAGAT 7.8888200932  
ATATAGCA 0.89931839882  
ATATAGCC 0.414865911306  
ATATAGCG 1.19491066121  
ATATAGGA 0.761085697379  
ATATAGGC -0.345448710371  
ATATAGGG 0.475811212021  
ATATAGTA 2.50120072444  
ATATAGTC 0.718317918228  
ATATAGTG 0.660133591289  
ATATATAA 2.97544443104  
ATATATAC 2.9186475176  
ATATATAG 2.07761303211  
ATATATAT 4.13291244032  
ATATATCA 3.6719424752

ATATATCC 2.68241972005  
ATATATCG 4.31358567115  
ATATATGA 2.90084899935  
ATATATGC 2.66113803067  
ATATATGG 1.91831794046  
ATATATTA 2.76956329791  
ATATATTC 3.15584556364  
ATATATTG 3.66741691428  
ATATCAAA 3.76752684888  
ATATCAAC 5.38037413236  
ATATCAAG 2.62365904669  
ATATCAAT 2.87869429546  
ATATCACA 4.73571014932  
ATATCACC 3.26571313452  
ATATCACG 6.23219662038  
ATATCAGA 5.67279452911  
ATATCAGC 2.38660606744  
ATATCAGG 3.00235654133  
ATATCATA 4.24206121181  
ATATCATC 3.58740251939  
ATATCATG 5.00616273002  
ATATCCAA 7.72795958718  
ATATCCAC 6.73473775971  
ATATCCAG 8.02386367782  
ATATCCAT 9.85185781055  
ATATCCCA 4.69264857726  
ATATCCCC 4.56239115101  
ATATCCCG 3.29513607639  
ATATCCGA 8.81499283697  
ATATCCGC 8.79132943852  
ATATCCGG 9.9849028715  
ATATCCTA 13.1499197925  
ATATCCTC 7.19312004705  
ATATCCTG 3.6058009084  
ATATCGAA 5.22319178813  
ATATCGAC 4.00073934837  
ATATCGAG 2.58888327116  
ATATCGAT 5.57880719697  
ATATCGCA 4.71685355838  
ATATCGCC 4.27421611411  
ATATCGCG 9.50372837055  
ATATCGGA 5.24728620483  
ATATCGGC 4.82634735357  
ATATCGGG 3.77540044663  
ATATCGTA 6.00906613172  
ATATCGTC 3.99119552223  
ATATCGTG 3.78802831419  
ATATCTAA 10.9943857707  
ATATCTAC 5.15131263396  
ATATCTAG 8.58651657196  
ATATCTCA 6.71236297251  
ATATCTCC 7.59515395177  
ATATCTCG 9.48993552523  
ATATCTGA 6.79918243721

ATATCTGC 10.9236036351  
ATATCTGG 6.47299807307  
ATATCTTA 7.74797566687  
ATATCTTC 7.44134264596  
ATATCTTG 9.01620595622  
ATATGAAA 2.25797521885  
ATATGAAC 1.55201646791  
ATATGAAG 0.94711411431  
ATATGAAT 1.41592918659  
ATATGACA 0.359516267753  
ATATGACC 0.80990811977  
ATATGACG 2.27066451109  
ATATGAGA 2.27513936398  
ATATGAGC 1.05541156595  
ATATGAGG 1.03211410173  
ATATGATA 2.65957287769  
ATATGATC 3.48815854201  
ATATGATG 1.96746003254  
ATATGCAA 3.82826696504  
ATATGCAC 2.59204807949  
ATATGCAG 2.32794942396  
ATATGCAT 1.39896525977  
ATATGCCA 0.979641485377  
ATATGCCC 1.46473697161  
ATATGCCG 1.07576404376  
ATATGCGA 2.55035928356  
ATATGCGC 2.62747966145  
ATATGCGG 1.39138806874  
ATATGCTA 3.22344642388  
ATATGCTC 0.738146325938  
ATATGCTG 3.01431788583  
ATATGGAA 2.79765031846  
ATATGGAC 0.897463635029  
ATATGGAG 0.0462316080329  
ATATGGAT 4.65326255317  
ATATGGCA 1.24896646588  
ATATGGCC -0.0638597054863  
ATATGGCG 1.15696092898  
ATATGGGA 2.46738631041  
ATATGGGC 0.848090743001  
ATATGGGG 0.438452986336  
ATATGGTA 2.1615923244  
ATATGGTC 1.88223917767  
ATATGGTG 1.87465963421  
ATATGTAA 2.03369256013  
ATATGTAC 1.83233306719  
ATATGTAG 2.26078846895  
ATATGTCA 1.32479248211  
ATATGTCC 0.755516178377  
ATATGTCCG 1.53766923222  
ATATGTGA 0.937727639893  
ATATGTGC 1.27196229574  
ATATGTGG 1.38671874795  
ATATGTTA 2.66836653865

ATATG TTC 1.98711775807  
ATATG TTG 2.10714706117  
ATATTA AAA 1.65888912848  
ATATTA AC 1.17483995277  
ATATTA AG 2.76956329791  
ATATTA AT 2.17798931455  
ATATTACA 4.97590127599  
ATATTACC 2.9850347831  
ATATTACG 5.82875360749  
ATATTAGA 2.18332463564  
ATATTAGC 1.50761191722  
ATATTAGG 1.3815687464  
ATATTATA 4.27836920625  
ATATTATC 2.46684603465  
ATATTATG 2.81277699406  
ATATTCAA 4.85475587348  
ATATTCAC 4.15442806622  
ATATTCAG 2.41021562129  
ATATTCAT 1.60143667  
ATATTCCA 4.49664479318  
ATATTCCC 7.85387311272  
ATATTCCG 5.13105242386  
ATATTCGA 3.93785825557  
ATATTCGC 5.23869250079  
ATATTCGG 2.72676206192  
ATATTCTA 3.42603127373  
ATATTCTC 11.4461266131  
ATATTCTG 5.72075413086  
ATATTGAA 2.72265235912  
ATATTGAC 2.31078031259  
ATATTGAG 1.69394615061  
ATATTGAT 3.89040834793  
ATATTGCA 2.22652003508  
ATATTGCC 3.07073788701  
ATATTGCG 3.90762921286  
ATATTGGA 3.68098732387  
ATATTGGC 1.87522996885  
ATATTGGG 1.48127092571  
ATATTGTA 2.85589920666  
ATATTGTC 4.27861124561  
ATATTGTG 3.37088681473  
ATATTTAA 4.89867007231  
ATATTTAC 2.84776840942  
ATATTTAG 2.40505594863  
ATATTTCA 4.6298009413  
ATATTTCC 5.5287646453  
ATATTTCCG 3.78751077863  
ATATTTGA 2.73211437282  
ATATTTGC 4.96643168222  
ATATTTGG 1.70143107393  
ATATTTTA 4.4872747858  
ATATTTTC 5.63635898045  
ATATTTTG 3.27407786828  
ATCAAAAA 1.79092290404

ATCAAAAC 0.605079047555  
ATCAAAAG 1.93711937988  
ATCAAAAT 3.01501002429  
ATCAAACA 1.25467033502  
ATCAAACC -0.0510415521232  
ATCAAACG 1.08422601148  
ATCAAAGA 1.59994261281  
ATCAAAGC 1.82390403355  
ATCAAAGG 0.537482369421  
ATCAAATA 1.24230855392  
ATCAAATC 5.40341073775  
ATCAAATG 0.704463125463  
ATCAACAA 0.740504510678  
ATCAACAC 1.08217416596  
ATCAACAG 0.707543507547  
ATCAACAT 1.4021088962  
ATCAACCA 0.675101608261  
ATCAACCC 0.107339226717  
ATCAACCG 0.0296422410336  
ATCAACGA 1.40607666879  
ATCAACGC 2.17983780518  
ATCAACGG 1.41630975819  
ATCAACTA 1.08504570415  
ATCAACTC 1.24155865013  
ATCAACTG 1.60406590746  
ATCAAGAA 0.890759458528  
ATCAAGAC 1.62259211207  
ATCAAGAG 1.72540760754  
ATCAAGAT 3.70594560674  
ATCAAGCA 1.36084327706  
ATCAAGCC -0.566055298355  
ATCAAGCG -0.200295669851  
ATCAAGGA 0.647459459184  
ATCAAGGC 1.35870047076  
ATCAAGGG 0.287883596428  
ATCAAGTA 0.883479719758  
ATCAAGTC 1.15375194715  
ATCAAGTG 0.638940248895  
ATCAATAA 0.121618241809  
ATCAATAC 1.95021773432  
ATCAATAG 1.71027465878  
ATCAATCA 1.6700307803  
ATCAATCC 0.373376288149  
ATCAATCG 0.651201920845  
ATCAATGA 1.49084899284  
ATCAATGC 1.59798094395  
ATCAATGG 0.557499756024  
ATCAATTA 2.57142977661  
ATCAATTG 0.823594321406  
ATCAATTG 1.54078490082  
ATCACAAA 2.53659283778  
ATCACAAAC 0.921878244186  
ATCACAAAG 1.05500302652  
ATCACAAAT 2.99672977976

ATCACACA 2.90823825701  
ATCACACC 0.568722436138  
ATCACACG 1.46749271776  
ATCACAGA 2.12818305184  
ATCACAGC 1.27206841667  
ATCACAGG 0.94802424502  
ATCACATA 2.59406855921  
ATCACATC 2.04960390328  
ATCACATG 2.08764956255  
ATCACCAA 0.76205176375  
ATCACACC 1.27532366304  
ATCACACG 1.25058101998  
ATCACCAT 1.59010865311  
ATCACCCA 1.04427226656  
ATCACCCC 0.524751778892  
ATCACCCG 0.125513873083  
ATCACCGA 1.93178562708  
ATCACCGC 1.97618521152  
ATCACCGG 0.201254417537  
ATCACCTA 1.27757938619  
ATCACCTC 2.41270266715  
ATCACCTG 0.646570500383  
ATCACGAA 2.99809549859  
ATCACGAC 1.51395146639  
ATCACGAG 1.26262992732  
ATCACGAT 2.91564162928  
ATCACGCA 2.35914557857  
ATCACGCC 2.65903913647  
ATCACGCG 2.03198521556  
ATCACGGA 0.463338343743  
ATCACGGC 1.59999358222  
ATCACGGG 0.79997666473  
ATCACGTA 2.31991586068  
ATCACGTC 0.616687004139  
ATCACGTG 2.44975507637  
ATCACTAA 0.397323547015  
ATCACTAC 1.94945711388  
ATCACTAG 0.0863447957167  
ATCACTCA 2.5410473029  
ATCACTCC 1.03855193038  
ATCACTCG 1.31179162302  
ATCACTGA 0.835859129935  
ATCACTGC 1.18576204405  
ATCACTGG 0.201307216619  
ATCACTTA 3.03512229241  
ATCACTTC 0.43886858307  
ATCACTTG 1.35964092173  
ATCAGAAA 4.86184192849  
ATCAGAAC 1.51016639953  
ATCAGAAG 1.60785489504  
ATCAGAAT 5.0647540281  
ATCAGACA 2.37929391735  
ATCAGACC 0.541234502201  
ATCAGACG 0.861753681676



ATCAGAGA 2.13401186138  
ATCAGAGC 1.94352139926  
ATCAGAGG -0.0855026242213  
ATCAGATA 5.35045273578  
ATCAGATC 4.41054569616  
ATCAGATG 2.49819718855  
ATCAGCAA 1.59654674315  
ATCAGCAC 0.612369502971  
ATCAGCAG 2.30394701358  
ATCAGCAT 2.9599604468  
ATCAGCCA 1.46602506011  
ATCAGCCC -0.272142151319  
ATCAGCCG 0.459573664647  
ATCAGCGA 0.991656674484  
ATCAGCGC 0.382975527183  
ATCAGCGG 0.460894687222  
ATCAGCTA 0.62271394093  
ATCAGCTC 0.342511304019  
ATCAGCTG 1.04817678481  
ATCAGGAA 5.14357312496  
ATCAGGAC 0.394219640588  
ATCAGGAG 0.0137434442053  
ATCAGGAT 5.39605598246  
ATCAGGCA 0.206169959791  
ATCAGGCC 0.0814235030675  
ATCAGGCG 0.95552851058  
ATCAGGGA 0.0288643694103  
ATCAGGGC 0.59448263774  
ATCAGGGG 0.803736900339  
ATCAGGTA 1.44568486723  
ATCAGGTC 0.31726158067  
ATCAGGTG 1.27460015879  
ATCAGTAA 4.21948150144  
ATCAGTAC 1.30206875049  
ATCAGTAG 1.05118162762  
ATCAGTCA 0.00483974159197  
ATCAGTCC -0.689312664138  
ATCAGTCG 1.24538972015  
ATCAGTGA 1.90876679563  
ATCAGTGC 0.881859676639  
ATCAGTGG 0.247739827098  
ATCAGTTA 1.52413802987  
ATCAGTTC 1.318381053  
ATCAGTTG 1.62129382969  
ATCATAAA 1.90987766741  
ATCATAAC 1.30153971414  
ATCATAAG 0.522728162593  
ATCATAAT 3.34772370064  
ATCATACA -0.418462522037  
ATCATACC 1.01920420342  
ATCATACG 2.14682269606  
ATCATAGA 2.69323673593  
ATCATAGC 0.92460288592  
ATCATAGG 0.517200987409

ATCATATA 3.95105776468  
ATCATATC 3.52981780182  
ATCATATG 1.87829937291  
ATCATCAA 0.678619281752  
ATCATCAC 1.53240396139  
ATCATCAG 1.20998244668  
ATCATCAT 1.48700459236  
ATCATCCA 1.81082920347  
ATCATCCC 0.623944002711  
ATCATCCG 0.778200964145  
ATCATCGA 1.84187244984  
ATCATCGC 0.227272864154  
ATCATCGG 1.26468595493  
ATCATCTA 1.50643517728  
ATCATCTC 1.459559525  
ATCATCTG 1.65531055308  
ATCATGAA 1.57984576621  
ATCATGAC 0.778200964145  
ATCATGAG -0.153712242193  
ATCATGAT 2.4009906807  
ATCATGCA -0.205617399102  
ATCATGCC 0.803080832538  
ATCATGCG 0.352677479731  
ATCATGGA 1.54675328813  
ATCATGGC 1.09889892863  
ATCATGGG 0.107274142701  
ATCATGTA 3.23776464621  
ATCATGTC 1.68359596226  
ATCATGTG 1.74338700185  
ATCATTAA 1.7969289303  
ATCATTAC 2.3695443839  
ATCATTAG 1.85944983927  
ATCATTCA 0.50195486042  
ATCATTCC -0.193246992409  
ATCATTCCG 1.02444124504  
ATCATTGA 1.59383752293  
ATCATTGC 0.92853040575  
ATCATTGG 1.70762529495  
ATCATTTA 3.01964797929  
ATCATTTT 0.0379045132156  
ATCATTTG 0.876315511652  
ATCCAAAA 1.75736490535  
ATCCAAAC 1.28988653854  
ATCCAAAG 3.80406146116  
ATCCAAAT 4.49990474442  
ATCCAACA 2.16795748898  
ATCCAACC 0.787553197573  
ATCCAACG 3.23254119644  
ATCCAAGA 1.97313436556  
ATCCAAGC 0.978116585158  
ATCCAAGG 1.27083521831  
ATCCAATA 4.23837886792  
ATCCAATC 2.36530529721  
ATCCAATG 2.65515500599

ATCCACAA 2.85185589478  
ATCCACAC 2.27822392816  
ATCCACAG 1.94251534151  
ATCCACAT 4.26460119217  
ATCCACCA 1.44035398963  
ATCCACCC 2.20625250629  
ATCCACCG 2.54795509566  
ATCCACGA 1.97166017337  
ATCCACGC 3.41019233329  
ATCCACGG 1.92633477532  
ATCCACTA 2.75095083738  
ATCCACTC 2.56260657952  
ATCCACTG 1.95235714266  
ATCCAGAA 2.34634807435  
ATCCAGAC 1.54957777764  
ATCCAGAG 0.959980361886  
ATCCAGAT 3.76187185809  
ATCCAGCA 1.84973872891  
ATCCAGCC 2.25944731999  
ATCCAGCG 0.523090960245  
ATCCAGGA 3.22322241985  
ATCCAGGC 0.991711564618  
ATCCAGGG 1.7431904429  
ATCCAGTA 2.21350976625  
ATCCAGTC 1.01702924718  
ATCCAGTG 2.84820779187  
ATCCATAA 2.55724485889  
ATCCATAC 1.99914549349  
ATCCATAG 0.817923386346  
ATCCATCA 0.833550607698  
ATCCATCC 1.39507459474  
ATCCATCG 0.608360954848  
ATCCATGA 2.16814568373  
ATCCATGC 2.68394540441  
ATCCATGG 1.73001471951  
ATCCATTA 3.08520901757  
ATCCATTC 0.947506448083  
ATCCATTG 2.85247510778  
ATCCCAA 2.17914305291  
ATCCCAAC 2.86356082394  
ATCCCAAG 1.24212035917  
ATCCCAAT 3.32257251815  
ATCCCACA 1.64971202072  
ATCCCACC 1.55426434962  
ATCCCACG 1.49997983606  
ATCCCAGA 3.46134941607  
ATCCCAGC 1.18480773985  
ATCCCAGG 0.392762960966  
ATCCCATA 2.94189453518  
ATCCCATC 1.83479815701  
ATCCCATG 1.24287183125  
ATCCCAA 1.70546000982  
ATCCCCAC 0.927237089623  
ATCCCCAG 1.66379369271

ATCCCAT 2.85704431942  
ATCCCCA 2.25931819748  
ATCCCCCC 1.90430814841  
ATCCCCCG 1.90369546995  
ATCCCCGA 2.29240283411  
ATCCCCGC 2.49140335816  
ATCCCCGG 1.37361621141  
ATCCCCTA 3.31212326618  
ATCCCCTC 0.514627685617  
ATCCCCTG 1.36204066615  
ATCCCGAA 2.08088056342  
ATCCCGAC 1.60960615172  
ATCCCGAG 1.45953887585  
ATCCCGAT 5.22852109744  
ATCCCGCA 2.02378776601  
ATCCCGCC 2.03096661149  
ATCCCGCG 3.56936431421  
ATCCCGGA 3.83989687768  
ATCCCGGC 0.122140482233  
ATCCCGGG 0.0979880388154  
ATCCCGTA 3.31940065251  
ATCCCGTC 1.02335598866  
ATCCCGTG 1.74402425018  
ATCCCTAA 2.38025580162  
ATCCCTAC 1.52708589149  
ATCCCTAG 1.572018433  
ATCCCTCA 0.802416400527  
ATCCCTCC 0.626946754461  
ATCCCTCG 0.677735811964  
ATCCCTGA 0.302058320263  
ATCCCTGC -0.00189867589782  
ATCCCTGG 0.923662957709  
ATCCCTTA 1.84522074806  
ATCCCTTC 0.714376806555  
ATCCCTTG 1.03247297865  
ATCCGAAA 1.79005041228  
ATCCGAAC 1.6522045556  
ATCCGAAG 2.3373782422  
ATCCGAAT 2.96499361078  
ATCCGACA 3.04553782616  
ATCCGACC -0.180787715975  
ATCCGACG 2.54882732604  
ATCCGAGA 2.62758525961  
ATCCGAGC 1.71237721232  
ATCCGAGG 2.87555039765  
ATCCGATA 4.39411263535  
ATCCGATC 4.84237161357  
ATCCGATG 2.93724481801  
ATCCGCAA 3.68464169993  
ATCCGCAC 2.92871933456  
ATCCGCAG 2.88306224327  
ATCCGCAT 3.57453444214  
ATCCGCCA 0.853657125424  
ATCCGCCC 1.3976654091

ATCCGCCG 1.14941092164  
ATCCGCGA 3.92365112042  
ATCCGCGC 1.04681707776  
ATCCGCGG 4.09467544971  
ATCCGCTA 3.95680763698  
ATCCGCTC 2.81328668817  
ATCCGCTG 2.47348747957  
ATCCGGAA 4.18136422361  
ATCCGGAC 2.08189420124  
ATCCGGAG 1.80951210161  
ATCCGGAT 6.47399289141  
ATCCGGCA 1.39487594473  
ATCCGGCC 1.04792219914  
ATCCGGCG 0.840726055213  
ATCCGGGA 1.89749811236  
ATCCGGGC 0.515912898914  
ATCCGGGG 1.03484580076  
ATCCGGTA 2.71405891646  
ATCCGGTC 2.11460846014  
ATCCGGTG 3.94946804182  
ATCCGTAA 2.84613817241  
ATCCGTAC 1.49882034731  
ATCCGTAG 0.373376288149  
ATCCGTCA 0.85681984271  
ATCCGTCC 0.146632460341  
ATCCGTCCG 2.34797491339  
ATCCGTGA 2.21278965996  
ATCCGTGC 1.08816660039  
ATCCGTGG -0.0650150121311  
ATCCGTTA 3.04984068996  
ATCCGTTC 0.936837112803  
ATCCGTTG 2.57913818119  
ATCCTAAA 2.53992728277  
ATCCTAAC 2.27933087921  
ATCCTAAG 0.87911464714  
ATCCTAAT 2.50340155746  
ATCCTACA 2.20340762903  
ATCCTACC 0.709384940876  
ATCCTACG 1.2418885137  
ATCCTAGA 1.16021068634  
ATCCTAGC 2.42096807592  
ATCCTAGG 1.6849415547  
ATCCTATA 2.57272518379  
ATCCTATC 3.85636966848  
ATCCTATG 1.78338465887  
ATCCTCAA 3.20412326679  
ATCCTCAC 1.2558648489  
ATCCTCAG 2.38839653136  
ATCCTCAT 2.53371554919  
ATCCTCCA 1.91357229624  
ATCCTCCC 0.372136032486  
ATCCTCCG 1.39083420114  
ATCCTCGA 1.57089867425  
ATCCTCGC 1.8748671712

ATCCTCGG 1.53663468387  
ATCCTCTA 3.20584368044  
ATCCTCTC 2.42146365542  
ATCCTCTG 2.5768275679  
ATCCTGAA 0.987231484099  
ATCCTGAC 2.65876311751  
ATCCTGAG 2.31256345782  
ATCCTGCA 1.56106863527  
ATCCTGCC 2.05979883096  
ATCCTGCG 2.93080385277  
ATCCTGGA 2.45812765159  
ATCCTGGC 3.49382137424  
ATCCTGGG 1.11001940854  
ATCCTGTA 3.53604966178  
ATCCTGTC 2.41373826103  
ATCCTGTG 3.06350885627  
ATCCTTAA 1.84726239969  
ATCCTTAC 2.9723535937  
ATCCTTAG 2.71791717016  
ATCCTTCA 2.6839114248  
ATCCTTCC 1.31946369556  
ATCCTTCG 0.332401586732  
ATCCTTGA 2.98496551698  
ATCCTTGC 1.53649667439  
ATCCTTGG 3.91337228924  
ATCCTTTA 3.35118805229  
ATCCTTTC 1.62991158084  
ATCCTTTG 1.66597622902  
ATCGAAAA 2.43118339137  
ATCGAAAC 0.937244345326  
ATCGAAAG 1.57093474491  
ATCGAAAT 6.52829230372  
ATCGAACA 0.898697356153  
ATCGAACC 0.814482820426  
ATCGAACG 1.11798710367  
ATCGAAGA 0.0332749224251  
ATCGAAGC 0.743647362962  
ATCGAAGG 1.53240396139  
ATCGAATA 2.89536573628  
ATCGAATC 5.81030869255  
ATCGAATG 1.07089816401  
ATCGACAA 0.548040094761  
ATCGACAC 0.651793688773  
ATCGACAG 0.141332687144  
ATCGACAT 0.136532675554  
ATCGACCA 0.912796802089  
ATCGACCC 0.181806581427  
ATCGACCG 0.173729106032  
ATCGACGA -0.0536093649013  
ATCGACGC 1.19676464086  
ATCGACGG 0.187005461329  
ATCGACTA 0.0584318553081  
ATCGACTC 1.61566706812  
ATCGACTG 0.839014005773

ATCGAGAA 2.64293437095  
ATCGAGAC 0.660778681063  
ATCGAGAG 0.416244437832  
ATCGAGAT 3.92452544185  
ATCGAGCA 1.01338140566  
ATCGAGCC 0.751381644325  
ATCGAGCG 1.52941009662  
ATCGAGGA 0.18754678261  
ATCGAGGC -0.351824330208  
ATCGAGGG 0.155877527316  
ATCGAGTA 1.87653478577  
ATCGAGTC 0.469828971482  
ATCGAGTG 0.866753911566  
ATCGATAA 0.911816621112  
ATCGATAC 3.62822378981  
ATCGATAG 1.50025663916  
ATCGATCA 2.41664586988  
ATCGATCC 1.41675253861  
ATCGATCG 2.49202544635  
ATCGATGA 0.926072896004  
ATCGATGC 0.260501522037  
ATCGATGG 0.636025582742  
ATCGATTA 0.794179482359  
ATCGATTC 4.25674824357  
ATCGATTG 3.06766220979  
ATCGCAAA 3.31183862162  
ATCGCAAC 1.30151148493  
ATCGCAAG 3.19492733956  
ATCGCAAT 7.74756372948  
ATCGCACA 3.1292452816  
ATCGCACC 1.23839044383  
ATCGCACG 1.73304570048  
ATCGCAGA 2.93563836673  
ATCGCAGC 0.452661167015  
ATCGCAGG 1.58026894301  
ATCGCATA 2.72974599419  
ATCGCATC 3.23350151241  
ATCGCATG 4.13128586266  
ATCGCCAA 2.66891308756  
ATCGCCAC 1.31475098542  
ATCGCCAG 1.00709491694  
ATCGCCAT 1.39942659828  
ATCGCCCA 1.37700058029  
ATCGCCCC 1.63860068916  
ATCGCCCG 2.00110141196  
ATCGCCGA 2.13106765911  
ATCGCCGC 2.39701454389  
ATCGCCGG 1.43100724521  
ATCGCCTA 1.71158208951  
ATCGCCTC 1.15647632751  
ATCGCCTG 0.793568110811  
ATCGCGAA 4.7035910563  
ATCGCGAC 2.18902275439  
ATCGCGAG 2.96147018689

ATCGCGAT 9.24270173289  
ATCGCGCA 5.03574563743  
ATCGCGCC 3.31892415387  
ATCGCGCG 5.27595845877  
ATCGCGGA 3.68331362006  
ATCGCGGC 2.81536336493  
ATCGCGGG 4.80248896445  
ATCGCGTA 4.7429969454  
ATCGCGTC 3.84172759436  
ATCGCGTG 4.54055062779  
ATCGCTAA 1.21637636323  
ATCGCTAC 1.22039536662  
ATCGCTAG 1.21998264508  
ATCGCTCA -0.0696069639721  
ATCGCTCC 1.31450005909  
ATCGCTCG 1.02682739761  
ATCGCTGA 1.23859170765  
ATCGCTGC 1.80798511034  
ATCGCTGG 1.14637157647  
ATCGCTTA 1.6794742359  
ATCGCTTC 2.58248726355  
ATCGCTTG 2.37360468558  
ATCGGAAA 2.00489902513  
ATCGGAAC 0.883735350957  
ATCGGAAG 3.06639294077  
ATCGGAAT 2.32353704128  
ATCGGACA 0.555448956039  
ATCGGACC -0.505824092154  
ATCGGACG -0.218409937069  
ATCGGAGA 2.27040757298  
ATCGGAGC 1.0290697903  
ATCGGAGG 0.0359101716545  
ATCGGATA 4.82929260137  
ATCGGATC 4.24193574864  
ATCGGATG 0.383253375818  
ATCGGCAA 2.16523859764  
ATCGGCAC 0.339421250816  
ATCGGCAG -0.405230862993  
ATCGGCAT 2.89579466347  
ATCGGCCA -0.163776479083  
ATCGGCCC 1.21504174881  
ATCGGCCG 1.6216161132  
ATCGGCGA 0.735238194325  
ATCGGCGC 2.0609656384  
ATCGGCGG 0.164503642677  
ATCGGCTA 1.41980599839  
ATCGGCTC 0.444276045484  
ATCGGCTG 1.31914271896  
ATCGGGAA 2.69019425417  
ATCGGGAC 1.4727833426  
ATCGGGAG 1.39138388664  
ATCGGGCA 1.87166158733  
ATCGGGCC 0.0141815197566  
ATCGGGCG -0.233721670837



ATCGGGGA 2.80340175905  
ATCGGGGC -0.172338294571  
ATCGGGGG -0.355677617665  
ATCGGGTA 1.87788717414  
ATCGGGTC 1.14366052658  
ATCGGGTG 1.2484776823  
ATCGGTAA 1.52079861863  
ATCGGTAC 0.902841822705  
ATCGGTAG 0.562680339215  
ATCGGTCA 0.227844244318  
ATCGGTCC -0.421578452018  
ATCGGTCCG 1.08949755546  
ATCGGTGA 1.24034740782  
ATCGGTGC 0.779306608287  
ATCGGTGG 0.511863052499  
ATCGGTTA 0.926333232072  
ATCGGTTC 0.987764179788  
ATCGGTTG -0.35278882829  
ATCGTAAA 2.02203677072  
ATCGTAAC 2.41785998738  
ATCGTAAG 1.00519676381  
ATCGTAAT 8.79109210403  
ATCGTACA 1.44418845761  
ATCGTACC 0.426721134877  
ATCGTACG 1.80524687677  
ATCGTAGA 2.17594844707  
ATCGTAGC 1.66796063808  
ATCGTAGG -0.0804017624171  
ATCGTATA 1.57251976289  
ATCGTATC 6.83133629397  
ATCGTATG 1.01374472607  
ATCGTCAA 2.16069108067  
ATCGTCAC 1.72659323445  
ATCGTCAG 0.85538485776  
ATCGTCAT 3.88751720612  
ATCGTCCA 0.920357526073  
ATCGTCCC 0.762060127961  
ATCGTCCG 1.4634264043  
ATCGTCGA 1.97575419327  
ATCGTCGC 0.879982695414  
ATCGTCGG 1.30777627897  
ATCGTCTA 0.955784141779  
ATCGTCTC 1.33763912607  
ATCGTCTG 1.64310481679  
ATCGTGAA 0.49883736215  
ATCGTGAC 0.950964265188  
ATCGTGAG 0.760547512677  
ATCGTGCA 1.44824849791  
ATCGTGCC 0.69120219168  
ATCGTGCG 1.87763232708  
ATCGTGGA 2.18164656581  
ATCGTGGC 1.14145864803  
ATCGTGGG 1.69845446034  
ATCGTGTA 2.1135184989

ATCGTGTC 1.95374011267  
ATCGTGTG 0.870037125767  
ATCGTTAA 1.57358097216  
ATCGTTAC 0.485259633876  
ATCGTTAG 0.505575518259  
ATCGTTCA 2.49747028633  
ATCGTTCC 1.83273507208  
ATCGTTCCG -0.136678003721  
ATCGTTGA 0.802370397366  
ATCGTTGC 1.62246168265  
ATCGTTGG 0.202360061679  
ATCGTTTA 2.09426513069  
ATCGTTTC 1.48716638756  
ATCGTTTG 1.30747359908  
ATCTAAAA 2.54317547184  
ATCTAAAC 2.19736762316  
ATCTAAAG 0.740199739739  
ATCTAAAT 5.0266817079  
ATCTAACA 1.47183295912  
ATCTAACC 2.71943501308  
ATCTAACG 2.93615276571  
ATCTAAGA 3.54257400775  
ATCTAAGC 2.05778828374  
ATCTAAGG 2.31166613481  
ATCTAATA 2.81754877644  
ATCTAATC 4.21388140079  
ATCTAATG 1.77190138131  
ATCTACAA 0.823733637796  
ATCTACAC 2.32946203925  
ATCTACAG 2.23130384101  
ATCTACAT 3.48398898283  
ATCTACCA 2.30017370889  
ATCTACCC 1.14877053674  
ATCTACCG 3.77828662219  
ATCTACGA 3.12015495253  
ATCTACGC 2.65497674374  
ATCTACGG 1.83273507208  
ATCTACTA 3.84290172048  
ATCTACTC 1.57527681595  
ATCTACTG 2.12456605334  
ATCTAGAA 1.61448248674  
ATCTAGAC 2.82524750991  
ATCTAGAG 1.57657170036  
ATCTAGAT 12.2636851107  
ATCTAGCA 3.794799143  
ATCTAGCC 1.97317435694  
ATCTAGCG 1.11560591735  
ATCTAGGA 1.65017884825  
ATCTAGGC 1.52363304063  
ATCTAGGG 1.93178562708  
ATCTAGTA 3.48949289505  
ATCTAGTC 2.94687829803  
ATCTAGTG 4.64430056246  
ATCTATAA 3.19870613326

ATCTATAC 1.46074358362  
ATCTATAG 3.82270659439  
ATCTATCA 3.10545589721  
ATCTATCC 1.64812778688  
ATCTATCG -0.31595127474  
ATCTATGA 1.34740538794  
ATCTATGC 1.44508996273  
ATCTATGG 1.53310498683  
ATCTATTA 1.45430052733  
ATCTATTC 1.44888417794  
ATCTATTG 1.7762980811  
ATCTCAA 6.00551238757  
ATCTCAAC 2.77211778023  
ATCTCAAG 2.24202362294  
ATCTCAAT 3.04546986695  
ATCTCACA 1.34387412261  
ATCTCACC 2.81329426824  
ATCTCACG 1.10134964245  
ATCTCAGA 4.02755213365  
ATCTCAGC 1.17249692816  
ATCTCAGG 3.49721436871  
ATCTCATA 2.41211194475  
ATCTCATC 5.0120278716  
ATCTCATG 4.0213754252  
ATCTCCAA 5.15498765917  
ATCTCCAC 3.11345156017  
ATCTCCAG 3.25339056065  
ATCTCCAT 4.48292670299  
ATCTCCCA 2.63545153868  
ATCTCCCC 2.58417160654  
ATCTCCCG 1.25917498541  
ATCTCCGA 2.97322190335  
ATCTCCGC 2.52067652838  
ATCTCCGG 3.89411578445  
ATCTCCTA 3.04965667732  
ATCTCCTC 2.70854794693  
ATCTCCTG 3.79255335234  
ATCTCGAA 4.94380361626  
ATCTCGAC 1.66998268609  
ATCTCGAG 4.32908220171  
ATCTCGCA 3.09910066514  
ATCTCGCC 3.08671692799  
ATCTCGCG 3.37080657058  
ATCTCGGA 6.58316675554  
ATCTCGGC 2.616060161  
ATCTCGGG 4.1082685995  
ATCTCGTA 4.37955838545  
ATCTCGTC 2.76261107028  
ATCTCGTG 3.16921575493  
ATCTCTAA 2.19489495328  
ATCTCTAC 3.65815825546  
ATCTCTAG 2.60912309349  
ATCTCTCA 2.8867370071  
ATCTCTCC 1.12463429898

ATCTCTCG 2.7661794518  
ATCTCTGA 1.71592102397  
ATCTCTGC 2.52518980436  
ATCTCTGG 2.20340762903  
ATCTCTTA 2.31177094883  
ATCTCTTC 3.43496346694  
ATCTCTTG 5.21147771062  
ATCTGAAA 1.75193993037  
ATCTGAAC 4.24374006579  
ATCTGAAG 2.15052202976  
ATCTGAAT 3.23763761476  
ATCTGACA 2.21618762068  
ATCTGACC 3.41012751065  
ATCTGACG 2.36722174706  
ATCTGAGA 3.58702220917  
ATCTGAGC 1.15763346382  
ATCTGAGG 2.14407740518  
ATCTGATA 6.52222720522  
ATCTGATC 5.52104447854  
ATCTGATG 2.94085083848  
ATCTGCAA 4.64030090131  
ATCTGCAC 3.47879245536  
ATCTGCAG 3.57166656329  
ATCTGCAT 4.7185175136  
ATCTGCCA 1.99447172921  
ATCTGCCC 2.11205110263  
ATCTGCCG 2.23437193816  
ATCTGCGA 4.41340364251  
ATCTGCGC 4.25753291111  
ATCTGCGG 0.866341974175  
ATCTGCTA 3.41019233329  
ATCTGCTC 1.17507022995  
ATCTGCTG 3.76288157519  
ATCTGGAA 3.01399847752  
ATCTGGAC 3.08256096064  
ATCTGGAG 1.05181364831  
ATCTGGCA 1.10195657051  
ATCTGGCC 1.0844698805  
ATCTGGCG 4.43601550281  
ATCTGGGA 2.29129928102  
ATCTGGGC 1.76735673954  
ATCTGGGG 3.57454228359  
ATCTGGTA 1.37342801666  
ATCTGGTC 3.45723004215  
ATCTGGTG 3.18939859608  
ATCTGTAA 3.31356635396  
ATCTGTAC 3.02189664514  
ATCTGTAG 3.90233754249  
ATCTGTCA 1.00981014894  
ATCTGTCC 3.10869023306  
ATCTGTCT 4.0027752496  
ATCTGTGA 2.62561026029  
ATCTGTGC 2.91331350342  
ATCTGTGG -0.172338294571

ATCTGTTA 0.914637451273  
ATCTGTTC 0.0497443152729  
ATCTGTTG 1.97068861798  
ATCTTAAA 3.3438560372  
ATCTTAAC 3.88482732813  
ATCTTAAG 2.46799323847  
ATCTTAAT 4.06422710785  
ATCTTACA 3.48425167133  
ATCTTACC 3.20140803479  
ATCTTACG 2.60850989228  
ATCTTAGA 1.76111703813  
ATCTTAGC 4.13070428861  
ATCTTAGG 1.16000628593  
ATCTTATA 3.79474634392  
ATCTTATC 2.08926098008  
ATCTTATG 2.03699015032  
ATCTTCAA 2.89726415079  
ATCTTCAC 3.25991438386  
ATCTTCAG 3.75047013159  
ATCTTCAT 3.73824087095  
ATCTTCCA 2.59002211076  
ATCTTCCC 1.67651513488  
ATCTTCCG 2.27918894901  
ATCTTCGA 2.40786710767  
ATCTTCGC 2.5828686193  
ATCTTCGG 2.31440410701  
ATCTTCTA 2.28689291011  
ATCTTCTC 3.82122639043  
ATCTTCTG 4.49664479318  
ATCTTGAA 2.91479553706  
ATCTTGAC 2.1271001479  
ATCTTGAG 3.52151841346  
ATCTTGCA 3.76638879342  
ATCTTGCC 2.32334649409  
ATCTTGCG 1.28266639477  
ATCTTGGA 1.74217053192  
ATCTTGGC 2.09214846255  
ATCTTGGG 3.13406306713  
ATCTTGTA 3.25639383517  
ATCTTGTC 4.65147810103  
ATCTTGTG 2.39468066764  
ATCTTTAA 2.66798858087  
ATCTTTAC 2.38245088424  
ATCTTTAG 3.41181237641  
ATCTTTCA 3.99418259109  
ATCTTTCC 2.50098377772  
ATCTTTCG 2.52329112847  
ATCTTTGA 6.15792948397  
ATCTTTGC 2.07143397123  
ATCTTTGG 2.00899670438  
ATCTTTTA 3.16167672562  
ATCTTTTC 3.59623251239  
ATCTTTTG 1.22370445759  
ATGAAAAA 0.29364340123

ATGAAAAC 1.04940344863  
ATGAAAAG 0.847364624934  
ATGAAAAT 2.62815690116  
ATGAAACA 0.794247180192  
ATGAAACC 0.29866976928  
ATGAAACG 1.46007706056  
ATGAAAGA 1.64664627601  
ATGAAAGC 0.455142723867  
ATGAAAGG -0.879016106279  
ATGAAATA 1.72731438627  
ATGAAATC 11.6686012953  
ATGAAATG 0.0520374159958  
ATGAACAA 1.17548269011  
ATGAACAC -0.108669920412  
ATGAACAG -0.401074111506  
ATGAACAT 0.462477614154  
ATGAACCA -0.0884823743913  
ATGAACCC -0.414781485051  
ATGAACCG -0.263896084796  
ATGAACGA 1.08279076514  
ATGAACGC -0.664224997378  
ATGAACGG -0.253909216858  
ATGAACTA 0.495926616721  
ATGAACTC -0.124050658921  
ATGAACTG 1.17010293414  
ATGAAGAA 0.797991210143  
ATGAAGAC -0.298157461356  
ATGAAGAG -0.717230048034  
ATGAAGCA 0.659295863281  
ATGAAGCC -0.333989741296  
ATGAAGCG -0.185778013365  
ATGAAGGA 0.167689361543  
ATGAAGGC -0.442900655537  
ATGAAGGG -0.468556304501  
ATGAAGTA -0.879002253055  
ATGAAGTC -0.961588642833  
ATGAAGTG -0.534679051827  
ATGAATAA 2.07465471523  
ATGAATAC 0.991925897525  
ATGAATAG -0.122781389901  
ATGAATCA 0.727102953597  
ATGAATCC 1.50716547745  
ATGAATCG 1.09649395658  
ATGAATGA 0.162387497293  
ATGAATGC 0.895906323493  
ATGAATGG 1.09896244436  
ATGAATTA 2.02493575397  
ATGAATTC 0.892724786733  
ATGAATTG 0.991781876267  
ATGACAAA 2.07385148959  
ATGACAAC 0.950688246225  
ATGACAAG -0.0914783302202  
ATGACAAT 1.25963815359  
ATGACACA 0.568996886812

ATGACACC 0.0914626473246  
ATGACACG -0.240058867581  
ATGACAGA -0.325975258865  
ATGACAGC -0.17861563493  
ATGACAGG -0.93320103345  
ATGACATA 0.15019090936  
ATGACATC 0.538472221517  
ATGACATG 0.372337819076  
ATGACCAA 0.212241592835  
ATGACCAC -1.06354027214  
ATGACCAG 0.0255147642849  
ATGACCAT -0.2935728282  
ATGACCCA -1.77166326268  
ATGACCCC -0.868521896667  
ATGACCCG -1.10149157266  
ATGACCGA 0.602785424069  
ATGACCGC -0.392777075572  
ATGACCGG -0.194787836905  
ATGACCTA -0.683010492529  
ATGACCTC -0.534208564958  
ATGACCTG -0.155993319362  
ATGACGAA -0.419288749256  
ATGACGAC -0.501620553362  
ATGACGAG -0.224198232465  
ATGACGCA 0.00497095515209  
ATGACGCC -0.8578481179  
ATGACGCG -0.30430933855  
ATGACGGA 0.559207623359  
ATGACGGC 0.168589036989  
ATGACGGG -0.565550309115  
ATGACGTA 1.05259570204  
ATGACGTC 0.551395973044  
ATGACGTG 0.422603852011  
ATGACTAA 1.06044629821  
ATGACTAC 0.508498548623  
ATGACTAG 0.477473337576  
ATGACTCA -0.398674889856  
ATGACTCC -0.771765749304  
ATGACTCG -0.196391151602  
ATGACTGA 0.068281236528  
ATGACTGC -0.161909430358  
ATGACTGG -1.10298824367  
ATGACTTA -0.0324994032362  
ATGACTTC -0.609945972833  
ATGACTTG -0.00161559963167  
ATGAGAAA 1.36371952012  
ATGAGAAC -0.0921328297312  
ATGAGAAG 0.400940022748  
ATGAGAAT 5.06052722634  
ATGAGACA -0.0253030451939  
ATGAGACC -0.522446393234  
ATGAGACG -0.859612182277  
ATGAGAGA 0.561143938206  
ATGAGAGC -0.596260555341

ATGAGAGG -0.300032351529  
ATGAGATA 1.81575415546  
ATGAGATC 6.4320453277  
ATGAGATG 0.866769071699  
ATGAGCAA -0.145850406612  
ATGAGCAC 0.00984363082488  
ATGAGCAG -0.858559598599  
ATGAGCAT -1.13350428337  
ATGAGCCA -0.852809987679  
ATGAGCCC -0.861309332966  
ATGAGCCG -0.769978944728  
ATGAGCGA -0.848617688295  
ATGAGCGC 0.396577563946  
ATGAGCGG -0.48445510133  
ATGAGCTA 0.189242103628  
ATGAGCTC -0.734474960071  
ATGAGCTG -0.385555624896  
ATGAGGAA -0.169704613632  
ATGAGGAC 0.301672259649  
ATGAGGAG -0.586171748581  
ATGAGGCA -1.12664981245  
ATGAGGCC -1.13081832611  
ATGAGGCG -0.850013204624  
ATGAGGGA -0.159114476975  
ATGAGGGC -0.322810189145  
ATGAGGGG -0.287628487992  
ATGAGGTA 0.964800238477  
ATGAGGTC -0.425423636645  
ATGAGGTG -0.118435136758  
ATGAGTAA 0.964340206872  
ATGAGTAC 0.95569422651  
ATGAGTAG 0.988614715494  
ATGAGTCA -0.2539554814  
ATGAGTCC -0.451042430804  
ATGAGTCG 0.0174129804016  
ATGAGTGA -0.366901866069  
ATGAGTGC 0.235016555253  
ATGAGTGG -0.671281254886  
ATGAGTTA 1.14666301695  
ATGAGTTC -0.208093989704  
ATGAGTTG -0.35397288691  
ATGATAAA 1.58292065928  
ATGATAAC 0.70787206421  
ATGATAAG 0.304044820377  
ATGATAAT 1.82905220543  
ATGATACA 1.5666491323  
ATGATACC 2.18858049673  
ATGATACG 2.84634440249  
ATGATAGA 0.806131155739  
ATGATAGC 0.718686727657  
ATGATAGG 0.723828887753  
ATGATATA 1.59383752293  
ATGATATC 11.5019971902  
ATGATATG 2.99462565793



ATGATCAA -0.250622081933  
ATGATCAC 0.64638622636  
ATGATCAG 1.23025572586  
ATGATCAT 2.55514883989  
ATGATCCA 2.00460497084  
ATGATCCC 0.962975533571  
ATGATCCG 0.268279976888  
ATGATCGA 0.953185224591  
ATGATCGC 2.8671924598  
ATGATCGG -0.130579971136  
ATGATCTA 1.50049998543  
ATGATCTC 1.84037421055  
ATGATCTG 1.2672780762  
ATGATGAA 0.847501066126  
ATGATGAC -0.0795744896725  
ATGATGAG -0.0333867937473  
ATGATGCA -0.0907145732029  
ATGATGCC 0.0823566353576  
ATGATGCG 0.365692714816  
ATGATGGA -0.366909184753  
ATGATGGC -0.687888918596  
ATGATGGG -0.0123913172203  
ATGATGTA 1.4202346642  
ATGATGTC -0.286438678977  
ATGATGTG 0.258595527454  
ATGATTAA 0.427906239024  
ATGATTAC 4.45466377263  
ATGATTAG 1.50613249739  
ATGATTCA 1.09294204211  
ATGATTCC 6.04166512135  
ATGATTCCG 2.44076041297  
ATGATTGA 0.0497129494816  
ATGATTGC 5.66715600537  
ATGATTGG 0.791304546208  
ATGATTTA 1.28092977546  
ATGATTTTC 8.45001683049  
ATGATTTG 2.56986619191  
ATGCAAAA 1.10189070235  
ATGCAAAC -0.0830979135578  
ATGCAAAG 1.83452449048  
ATGCAAAT 3.01324778958  
ATGCAACA 0.547309533206  
ATGCAACC 0.164913227634  
ATGCAACG 1.34435584889  
ATGCAAGA 0.928765126421  
ATGCAAGC -0.60623592249  
ATGCAAGG 0.301401206936  
ATGCAATA 1.4526394473  
ATGCAATC 12.3337981095  
ATGCAATG -0.145492836592  
ATGCACAA 0.733284628292  
ATGCACAC -1.23325272722  
ATGCACAG 0.17592131346  
ATGCACAT 1.21414886929

ATGCACCA 0.570760167044  
ATGCACCC -0.208886237315  
ATGCACCG 0.367606550846  
ATGCACGA -0.290467876247  
ATGCACGC -0.603324131534  
ATGCACGG 0.295369042513  
ATGCACTA 0.0185214997411  
ATGCACTC -0.766011172133  
ATGCACTG -0.53428436562  
ATGCAGAA 1.71549680164  
ATGCAGAC -0.918448917674  
ATGCAGAG -0.694574014241  
ATGCAGCA -0.359810583427  
ATGCAGCC -0.82285199768  
ATGCAGCG -0.0444189266795  
ATGCAGGA 0.740520193574  
ATGCAGGC -0.148893933891  
ATGCAGGG -0.850068356141  
ATGCAGTA 2.89774535431  
ATGCAGTC -0.285611667614  
ATGCAGTG 0.537346712374  
ATGCATAA 1.58538182836  
ATGCATAC -0.0774293309317  
ATGCATAG 0.195984964605  
ATGCATCA 0.792908906431  
ATGCATCC -0.114681697071  
ATGCATCG -0.595505685298  
ATGCATGA 0.132873594622  
ATGCATGC -0.379292399144  
ATGCATGG -0.217642520709  
ATGCATTA 0.228668119102  
ATGCATTC 1.4544926428  
ATGCATTG -0.12461132244  
ATGCCAAA -0.661896087376  
ATGCCAAC 0.256598310695  
ATGCCAAG -0.0573162786655  
ATGCCAAT 1.19663996184  
ATGCCACA -0.654132531275  
ATGCCACC 0.277709056505  
ATGCCACG -0.477238878286  
ATGCCAGA -1.29504542706  
ATGCCAGC 0.529031379729  
ATGCCAGG -0.238837170011  
ATGCCATA 0.457754448753  
ATGCCATC 0.390346226749  
ATGCCATG -0.711897340756  
ATGCCCAA -0.237956052658  
ATGCCCAC 0.140083283125  
ATGCCCAG -0.474751571039  
ATGCCCAT 0.0600819573102  
ATGCCCCA -0.809596291528  
ATGCCCCC -0.89245373402  
ATGCCCCG 0.604782902209  
ATGCCCGA -0.680954464911

ATGCCCGC -0.704935964767  
ATGCCCGG -0.513803549452  
ATGCCCTA -0.240723822355  
ATGCCCTC -1.38672188453  
ATGCCCTG -0.184538541846  
ATGCCGAA -0.419291885835  
ATGCCGAC -0.149183021934  
ATGCCGAG -0.130565333766  
ATGCCGCA 0.10819891078  
ATGCCGCC -0.0893527750989  
ATGCCGCG -0.31802899703  
ATGCCGGA -0.459430950296  
ATGCCGGC -0.82539550197  
ATGCCGGG -0.375750417166  
ATGCCGTA 0.216528773738  
ATGCCGTC -0.250517790677  
ATGCCGTG -1.06422822849  
ATGCCTAA 0.57436409646  
ATGCCTAC 0.274883521476  
ATGCCTAG -0.430172940206  
ATGCCTCA -0.380961320621  
ATGCCTCC -0.89665857972  
ATGCCTCG -1.08370847592  
ATGCCTGA 1.20998244668  
ATGCCTGC -0.440405245461  
ATGCCTGG -0.695803553259  
ATGCCTTA 0.0276285572345  
ATGCCTTC 0.415894186496  
ATGCCTTG -0.811961533571  
ATGCGAAA 1.23780834702  
ATGCGAAC 1.10594734469  
ATGCGAAG -0.310978228535  
ATGCGAAT 4.85729963916  
ATGCGACA 0.0135981160391  
ATGCGACC -0.234758048857  
ATGCGACG 1.07368971943  
ATGCGAGA 1.48084330543  
ATGCGAGC -0.939989374825  
ATGCGAGG -0.0309690140041  
ATGCGATA 1.87299541761  
ATGCGATC 7.55850224054  
ATGCGATG -0.167735364703  
ATGCGCAA 1.82033251546  
ATGCGCAC 0.365552614281  
ATGCGCAG -0.31327002235  
ATGCGCAT 1.85324673128  
ATGCGCCA -0.2484682976  
ATGCGCCC 0.133871288166  
ATGCGCCG 0.382020177458  
ATGCGCGA 0.988858845903  
ATGCGCGC 0.462696129167  
ATGCGCGG 1.00981014894  
ATGCGCTA 2.69835563306  
ATGCGCTC 0.151665362931

ATGCGCTG 0.359552077031  
ATGCGGAA 0.452661167015  
ATGCGGAC -0.393863900239  
ATGCGGAG -0.797163937398  
ATGCGGCA -0.0907995222209  
ATGCGGCC -0.805574935707  
ATGCGGCG -0.140380212616  
ATGCGGGA -0.0288672446078  
ATGCGGGC -0.30945228279  
ATGCGGGG 0.534674346959  
ATGCGGTA 0.00657244017769  
ATGCGGTC -0.648564580563  
ATGCGGTG -0.374817023494  
ATGCGTAA 1.48612582744  
ATGCGTAC -0.639980286257  
ATGCGTAG 0.0401045620912  
ATGCGTCA 0.672705523191  
ATGCGTCC -1.10713663094  
ATGCGTCG 0.0403541815133  
ATGCGTGA 1.17596049566  
ATGCGTGC -0.124815984228  
ATGCGTGG -1.23342837565  
ATGCGTTA 0.144908910111  
ATGCGTTC 0.143989108283  
ATGCGTTG -0.189702396615  
ATGCTAAA 1.36200956174  
ATGCTAAC -0.0286604917671  
ATGCTAAG 0.341480937776  
ATGCTAAT 1.19816538482  
ATGCTACA 0.643996153065  
ATGCTACC -0.510486617026  
ATGCTACG 0.139488117236  
ATGCTAGA -0.150258345811  
ATGCTAGC 0.513814004715  
ATGCTAGG -0.0210819938346  
ATGCTATA 1.5148388569  
ATGCTATC 1.92399776249  
ATGCTATG -0.145011894459  
ATGCTCAA -0.369258482519  
ATGCTCAC -0.462456965008  
ATGCTCAG 0.0145014508275  
ATGCTCCA -0.806699399324  
ATGCTCCC -0.303503237714  
ATGCTCCG -0.800578365159  
ATGCTCGA 1.00594588346  
ATGCTCGC -0.551417406335  
ATGCTCGG -1.06080308409  
ATGCTCTA -0.207321607094  
ATGCTCTC 0.274436820332  
ATGCTCTG 1.02951675283  
ATGCTGAA 0.625807653475  
ATGCTGAC 0.153898868651  
ATGCTGAG -0.291461387685  
ATGCTGCA 0.361894840257

ATGCTGCC -0.586592050184  
ATGCTGCG -0.446442898897  
ATGCTGGA -0.309516059899  
ATGCTGGC -0.595740667351  
ATGCTGGG -0.207568089937  
ATGCTGTA 0.457213911617  
ATGCTGTC -0.105523408785  
ATGCTGTG 0.838506141336  
ATGCTTAA 0.152460224358  
ATGCTTAC -0.572336298055  
ATGCTTAG -0.322295267405  
ATGCTTCA -0.303874138196  
ATGCTTCC -0.0719941620689  
ATGCTTCG 0.277017440808  
ATGCTTGA 1.33934019748  
ATGCTTGC -0.668084296611  
ATGCTTGG 0.602996620397  
ATGCTTTA 0.480476089326  
ATGCTTTC 0.758983927982  
ATGCTTTG 1.14305203023  
ATGGAAAA 1.25935742976  
ATGGAAAC -0.195088164356  
ATGGAAAG -0.0943485615024  
ATGGAAAT 5.10579512044  
ATGGAAACA -0.0039526124624  
ATGGAAACC -0.17241357247  
ATGGAACG -0.779326473288  
ATGGAAGA 1.01256092883  
ATGGAAGC -0.743813078893  
ATGGAAGG -1.18670537022  
ATGGAATA 0.679078790594  
ATGGAATC 6.35909111104  
ATGGAATG -0.171091504369  
ATGGACAA 0.462218323613  
ATGGACAC -0.247230394371  
ATGGACAG 0.0490827584588  
ATGGACAT 0.692334496745  
ATGGACCA -1.50355736593  
ATGGACCC -0.993669312756  
ATGGACCG -1.10941718535  
ATGGACGA -0.298432434793  
ATGGACGC -0.150795746368  
ATGGACGG -0.191808086735  
ATGGACTA -0.274707350281  
ATGGACTC -1.02163871159  
ATGGACTG -0.792528334831  
ATGGAGAA -0.919967283353  
ATGGAGAC -0.725347514813  
ATGGAGAG -0.371138861705  
ATGGAGCA -0.922296716118  
ATGGAGCC -1.68297962446  
ATGGAGCG -1.23763661931  
ATGGAGGA -0.999641359413  
ATGGAGGC -0.754730465305

ATGGAGGG -1.53007557416  
ATGGAGTA -0.510810730202  
ATGGAGTC 0.31740089706  
ATGGAGTG -0.0880855971319  
ATGGATAA 1.18004249201  
ATGGATAC 3.23910710208  
ATGGATAG 0.199587325732  
ATGGATCA 1.26687842374  
ATGGATCC 1.41323486512  
ATGGATCG 1.6383246702  
ATGGATGA -0.570481534265  
ATGGATGC -0.605389307507  
ATGGATGG -0.291499288016  
ATGGATTA 3.86613802141  
ATGGATTC 8.31705462751  
ATGGATTG 3.04682905124  
ATGGCAAA 0.521838681029  
ATGGCAAC -0.405625287818  
ATGGCAAG -0.368531318925  
ATGGCAAT 2.25842662486  
ATGGCACA -0.199168069655  
ATGGCACC -0.394758870816  
ATGGCACG -0.163579135979  
ATGGCAGA -0.718915959314  
ATGGCAGC -0.509091362078  
ATGGCAGG -0.753695394194  
ATGGCATA -0.0210195236337  
ATGGCATC -0.534191313773  
ATGGCATG -0.0922399961847  
ATGGCCAA -0.189531453052  
ATGGCCAC -0.878519742633  
ATGGCCAG -1.19988788952  
ATGGCCAT 1.24540853962  
ATGGCCCA -0.254561625316  
ATGGCCCC -0.454304473096  
ATGGCCCG -1.10590081877  
ATGGCCGA -0.51877058388  
ATGGCCGC -1.22604539115  
ATGGCCGG -1.18739959973  
ATGGCCTA 0.0542309303315  
ATGGCCTC -1.15654141152  
ATGGCCTG -0.736138131152  
ATGGCGAA 0.643627605018  
ATGGCGAC -0.805394582407  
ATGGCGAG -0.593761747304  
ATGGCGCA 0.0847461858887  
ATGGCGCC -0.411540614669  
ATGGCGCG -0.316157766199  
ATGGCGGA -0.512022495271  
ATGGCGGC -0.844465903058  
ATGGCGGG -0.812081507723  
ATGGCGTA -0.05204630297  
ATGGCGTC -1.05468204992  
ATGGCGTG 0.574015152032

ATGGCTAA 0.128786893402  
ATGGCTAC -1.49368994938  
ATGGCTAG -0.181134307968  
ATGGCTCA -1.05893603536  
ATGGCTCC 0.405404681753  
ATGGCTCG 0.285331989309  
ATGGCTGA -0.00914600335086  
ATGGCTGC -1.13705672061  
ATGGCTGG -0.527642136557  
ATGGCTTA -0.498079355528  
ATGGCTTC -0.285348717731  
ATGGCTTG 0.0879214494909  
ATGGGAAA 0.228482799552  
ATGGGAAC -0.624946923886  
ATGGGAAG -1.29961150212  
ATGGGAAT 3.45692579398  
ATGGGACA -0.467856063211  
ATGGGACC -0.333683140686  
ATGGGACG -0.237790336727  
ATGGGAGA -0.330090973442  
ATGGGAGC -0.688457946326  
ATGGGAGG -1.46707189339  
ATGGGATA 2.94103694217  
ATGGGATC 2.47071631191  
ATGGGATG -0.0876903881619  
ATGGGCAA -0.808850569841  
ATGGGCAC -0.250911692739  
ATGGGCAG -0.7723423571  
ATGGGCCA -1.08472054545  
ATGGGCCC -1.28598384996  
ATGGGCCG -1.1028429155  
ATGGGCGA 0.559415160344  
ATGGGCGC -0.856251860507  
ATGGGCGG -0.330505001887  
ATGGGCTA 0.0567882878459  
ATGGGCTC -1.07577920389  
ATGGGCTG -1.12640934138  
ATGGGGAA -0.231858020073  
ATGGGGAC -0.462694038114  
ATGGGGAG -1.10991877663  
ATGGGGCA 0.1084712704  
ATGGGGCC -0.576921192593  
ATGGGGCG 0.19848507955  
ATGGGGGA 0.0426736817773  
ATGGGGGC -1.27070269784  
ATGGGGGG -1.00323849291  
ATGGGGTA 0.527780930184  
ATGGGGTC -1.16856182826  
ATGGGGTG -0.0511596966036  
ATGGGTAA 0.969154071686  
ATGGGTAC -0.259976145033  
ATGGGTAG -0.117848073699  
ATGGGTCA -0.395581700074  
ATGGGTCC -1.13999438834

ATGGGTCG -0.644692735013  
ATGGGTGA 0.348283132375  
ATGGGTGC -0.593380130177  
ATGGGTGG 1.00427774612  
ATGGGTTA 0.835989297969  
ATGGGTTC -0.30231525837  
ATGGGTTG -0.596012242827  
ATGGTAAA 1.4418739236  
ATGGTAAC 1.09299640948  
ATGGTAAG 0.557499756024  
ATGGTAAT 2.69768911  
ATGGTACA -0.349810123646  
ATGGTACC -0.105954427033  
ATGGTACG -0.161277148282  
ATGGTAGA 0.131117110311  
ATGGTAGC -1.09756483697  
ATGGTAGG -0.706781318819  
ATGGTATA 1.82446809503  
ATGGTATC 2.44352792128  
ATGGTATG 0.693690283072  
ATGGTCAA 0.340441423177  
ATGGTCAC -0.187569522809  
ATGGTCAG -0.28715747836  
ATGGTCCA -0.520777210376  
ATGGTCCC -0.0722500546493  
ATGGTCCG -0.818924216469  
ATGGTCGA -0.167000359661  
ATGGTCGC 0.188598843526  
ATGGTCGG 0.185125604906  
ATGGTCTA -0.710995574257  
ATGGTCTC -0.7771408004  
ATGGTCTG -0.865337746091  
ATGGTGAA 0.647131686665  
ATGGTGAC -0.697407390719  
ATGGTGAG 0.713859270999  
ATGGTGCA 0.509629808161  
ATGGTGCC -0.30262185898  
ATGGTGCG -0.346250629101  
ATGGTGGA -0.39319005849  
ATGGTGGC 0.512097250407  
ATGGTGGG -0.542163191004  
ATGGTGTA 1.9533151062  
ATGGTGTC -0.20522192875  
ATGGTGTG 0.275948128707  
ATGGTTAA 2.1010715074  
ATGGTTAC -0.42388619011  
ATGGTTAG 0.824367749542  
ATGGTTCA -0.507569075675  
ATGGTTCC -0.0287083245988  
ATGGTTCG -0.214418117367  
ATGGTTGA 0.866769071699  
ATGGTTGC -0.478036614911  
ATGGTTGG -0.114021969928  
ATGGTTTA 0.992253670044



ATGGTTTC 0.0813842958284  
ATGGTTTG -0.313503697495  
ATGTAAAA 2.28054630363  
ATGTAAAC -0.00656799669059  
ATGTAAAG 1.97948201756  
ATGTAAAT 2.59548629298  
ATGTAACA 0.438915893139  
ATGTAACC 0.541513396362  
ATGTAACG -0.101444287631  
ATGTAAGA 0.303404958235  
ATGTAAGC 0.928060964407  
ATGTAAGG -0.0868186805464  
ATGTAATA 2.37506162659  
ATGTAATC 16.7083374456  
ATGTAATG 1.57069009174  
ATGTACAA 0.988052222304  
ATGTACAC 0.09509924944  
ATGTACAG 0.560638687585  
ATGTACAT 1.47760792406  
ATGTACCA -0.646725499668  
ATGTACCC -0.81673514562  
ATGTACCG 0.899352378427  
ATGTACGA 1.08314755102  
ATGTACGC 0.506318364748  
ATGTACGG -0.885080420639  
ATGTACTA 0.061636916412  
ATGTACTC 0.592146931817  
ATGTACTG 0.0661342481161  
ATGTAGAA 0.708595045699  
ATGTAGAC 0.520186487974  
ATGTAGAG 0.172789961966  
ATGTAGCA -0.0927638048988  
ATGTAGCC -0.440003501951  
ATGTAGCG -0.302509464894  
ATGTAGGA 1.11989179134  
ATGTAGGC -0.999103436093  
ATGTAGGG 0.502641509867  
ATGTAGTA 1.36635503073  
ATGTAGTC 0.46286393615  
ATGTAGTG 0.488740713943  
ATGTATAA 2.17874862808  
ATGTATAC 1.87273743397  
ATGTATAG -0.126916446716  
ATGTATCA 0.888257775294  
ATGTATCC 1.50192817446  
ATGTATCG -0.202938237765  
ATGTATGA 0.186393305637  
ATGTATGC 0.373689946061  
ATGTATGG 0.890598186085  
ATGTATTA 1.11229421255  
ATGTATTC 3.01818790171  
ATGTATTG -0.213018418932  
ATGTCAAA 1.36322472477  
ATGTCAAC 0.384979539864

ATGTCAAG -0.180275408051  
ATGTCAAT 1.83920112995  
ATGTCACA 0.27096488862  
ATGTCACC 0.47574874182  
ATGTCACG 0.19545122339  
ATGTCAGA 0.525018910881  
ATGTCAGC 0.0287679196022  
ATGTCAGG -0.400795740108  
ATGTCATA 0.846642166208  
ATGTCATC -0.418547732437  
ATGTCATG 0.5810549425  
ATGTCCAA 1.3995682671  
ATGTCCAC 0.175109984993  
ATGTCCAG -0.722357832142  
ATGTCCCA -0.795497106974  
ATGTCCCC 0.14752429434  
ATGTCCCG 0.880133773975  
ATGTCCGA 0.361663778928  
ATGTCCGC -0.192868773243  
ATGTCCGG 0.941292623452  
ATGTCCTA 0.459278042064  
ATGTCCTC 0.157014798631  
ATGTCCTG 1.17596049566  
ATGTCGAA 1.12629799282  
ATGTCGAC 0.544643963712  
ATGTCGAG -0.538637937448  
ATGTCGCA 1.12477570642  
ATGTCGCC -0.267737348699  
ATGTCGCG 1.54473934295  
ATGTCGGA 0.337527279787  
ATGTCGGC 0.397482728406  
ATGTCGGG -0.233457152664  
ATGTCGTA 1.21931533787  
ATGTCGTC -0.674463314409  
ATGTCGTG 0.816704302592  
ATGTCTAA 1.22399171597  
ATGTCTAC -0.0777845485177  
ATGTCTAG 0.236807541934  
ATGTCTCA 0.194755164206  
ATGTCTCC 0.201893756916  
ATGTCTCG 0.356944272869  
ATGTCTGA 0.608603255585  
ATGTCTGC -0.0253796300009  
ATGTCTGG 0.0737378386815  
ATGTCTTA 0.523468656648  
ATGTCTTC 0.487266260372  
ATGTCTTG 0.835782022365  
ATGTGAAA 2.50344808339  
ATGTGAAC 0.161089476298  
ATGTGAAG 1.1575273429  
ATGTGAAT 1.90960478502  
ATGTGACA 0.425290332032  
ATGTGACC -0.887328563727  
ATGTGACG -0.0904194733835

ATGTGAGA 0.392180341393  
ATGTGAGC -1.02060416324  
ATGTGAGG -0.0253835507248  
ATGTGATA 3.39969524848  
ATGTGATC 2.81087988646  
ATGTGATG 0.365692714816  
ATGTGCAA 0.678783952156  
ATGTGCAC 0.771645252389  
ATGTGCAG -0.402230463677  
ATGTGCCA -0.520196681856  
ATGTGCCC -0.437581017339  
ATGTGCCG 0.304619859883  
ATGTGCGA 1.08794181221  
ATGTGCGC 1.01205829203  
ATGTGCGG 0.122007700383  
ATGTGCTA 0.881418987272  
ATGTGCTC 0.460467589698  
ATGTGCTG 0.263253086075  
ATGTGGAA 0.643566964488  
ATGTGGAC -0.0286003740005  
ATGTGGAG 0.200731654349  
ATGTGGCA -0.607413707951  
ATGTGGCC -0.595505685298  
ATGTGGCG 0.406530452278  
ATGTGGGA 0.00433475235263  
ATGTGGGC -1.27564307135  
ATGTGGGG 0.384430115753  
ATGTGGTA 0.681861981805  
ATGTGGTC -0.0513792571425  
ATGTGGTG 0.396626180923  
ATGTGTAA 0.99132158328  
ATGTGTAC -0.501291735317  
ATGTGTAG 0.552034005515  
ATGTGTCA 0.584953710354  
ATGTGTCC 0.0135981160391  
ATGTGTCCG 1.10811628916  
ATGTGTGA 1.76585536366  
ATGTGTGC -0.593134170097  
ATGTGTGG 0.202046665148  
ATGTGTGA 0.343927469495  
ATGTGTTC 0.133263053197  
ATGTGTTG -0.00367241139378  
ATGTTAAA 1.37839008484  
ATGTTAAC 1.99003033317  
ATGTTAAG -0.233010712902  
ATGTTAAT 2.81473421944  
ATGTTACA 1.34967862366  
ATGTTACC 0.389337555178  
ATGTTACG 0.756184269731  
ATGTTAGA 2.11792957468  
ATGTTAGC 0.638333059453  
ATGTTAGG 0.241877822092  
ATGTTATA 1.54236390703  
ATGTTATC 2.87460001417

ATGTTATG 1.34256146424  
ATGTTCAA 0.321751855071  
ATGTTCAC -0.252780571135  
ATGTTCAG 1.21469986169  
ATGTTCCA -0.0782035432127  
ATGTTCCC 0.645332597155  
ATGTTCCG -0.203605544974  
ATGTTCGA 1.27280551276  
ATGTTCGC -0.497976632562  
ATGTTCGG 0.446644685488  
ATGTTCTA 1.86560772824  
ATGTTCTC 0.331745780313  
ATGTTCTG 0.845044601907  
ATGTTGAA 1.72711599764  
ATGTTGAC 0.010279876705  
ATGTTGAG 1.12225180575  
ATGTTGCA 0.908512235002  
ATGTTGCC -0.626669689971  
ATGTTGCG 0.932655791446  
ATGTTGGA 1.2342953784  
ATGTTGGC 0.117189914845  
ATGTTGGG 0.935366579956  
ATGTTGTA 0.442867460075  
ATGTTGTC 1.11588376598  
ATGTTGTG 1.6044898684  
ATGTTTAA 2.18657648405  
ATGTTTAC 0.676609780058  
ATGTTTAG 0.488476718533  
ATGTTTCA 0.601730749338  
ATGTTTCC 0.00587847204598  
ATGTTTCG 0.247677356897  
ATGTTTGA 1.90011794007  
ATGTTTGC -0.410446732698  
ATGTTTGG -0.00617853811574  
ATGTTTTA 0.830265563826  
ATGTTTTC 1.97261865967  
ATGTTTTG 0.212886159846  
ATTA AAAA 1.59307637972  
ATTA AAAAC 1.00427774612  
ATTA AAAAG -0.0183777398645  
ATTA AAAAT 1.50727447358  
ATTA AAACA 0.0969103625039  
ATTA AAACC -0.122817983324  
ATTA AAACG 0.165016473364  
ATTA AAAGA 0.649402308571  
ATTA AAAGC 0.563959017972  
ATTA AAAGG 0.152924438069  
ATTA AAATA 1.43872898026  
ATTA AAATC 1.82186734818  
ATTA AAATG 0.81002626425  
ATTA ACAA 0.786646726206  
ATTA ACAC 1.24127975597  
ATTA ACAG 0.792146194941  
ATTA ACCA 0.651203489135

ATTAACCC 0.127758095448  
ATTAACCG -0.297115594323  
ATTAACGA 1.93587363521  
ATTAACGC 0.872873900205  
ATTAACGG -0.0763459042251  
ATTAACTA 1.31860636393  
ATTAACTC 0.083512203384  
ATTAACTG 1.56394749214  
ATTAAGAA 2.47947520912  
ATTAAGAC 0.289037334783  
ATTAAGAG 0.289401700725  
ATTAAGCA -0.631979918432  
ATTAAGCC -0.0302967405447  
ATTAAGCG 1.06226682101  
ATTAAGGA 0.165565636093  
ATTAAGGC -0.459108928173  
ATTAAGGG 0.17746947664  
ATTAAGTA 2.32730590248  
ATTAAGTC 0.681101622749  
ATTAAGTG 1.18789256542  
ATTAATAA 1.68026021036  
ATTAATAC 1.26428708662  
ATTAATAG -0.051912475594  
ATTAATCA 1.16204140302  
ATTAATCC 1.80855047873  
ATTAATCG 0.527107349816  
ATTAATGA 1.42507231474  
ATTAATGC 2.04778102804  
ATTAATGG 0.448139265441  
ATTAATTA 1.76938244689  
ATTAATTC 1.42507231474  
ATTAATTG 0.92558358966  
ATTACAAA 4.2060140762  
ATTACAAC 2.02603068147  
ATTACAAG 1.95284827868  
ATTACAAT 5.4405465277  
ATTACACA 4.37800316496  
ATTACACC 4.22741913768  
ATTACACG 3.34166722773  
ATTACAGA 4.73466253189  
ATTACAGC 2.457034031  
ATTACAGG 2.10636945092  
ATTACATA 2.53720786867  
ATTACATC 2.60030381714  
ATTACATG 2.95245278328  
ATTACCAA 3.77260862982  
ATTACCAC 2.57172147847  
ATTACCAG 1.88512796705  
ATTACCCA 2.37576787965  
ATTACCCC 1.61992941777  
ATTACCCG 1.67468546372  
ATTACCGA 1.22008432252  
ATTACCGC 2.86350436551  
ATTACCGG 2.48972973181

ATTACCTA 3.76080855777  
ATTACCTC 3.85927048141  
ATTACCTG 1.51783977898  
ATTACGAA 5.24207294894  
ATTACGAC 5.83393000857  
ATTACGAG 4.70311612595  
ATTACGCA 5.30925821245  
ATTACGCC 1.65190605782  
ATTACGCG 3.13178747898  
ATTACGGA 5.16654543049  
ATTACGGC 2.52950390757  
ATTACGGG 1.87928086079  
ATTACGTA 5.41709118899  
ATTACGTC 3.15530241269  
ATTACGTG 4.61877900225  
ATTACTAA 1.02728272435  
ATTACTAC 0.706239213394  
ATTACTAG 2.12699716355  
ATTACTCA 1.84638572582  
ATTACTCC 0.937911652535  
ATTACTCG 2.3695443839  
ATTACTGA 2.36262901107  
ATTACTGC 1.50737196891  
ATTACTGG 0.900626352315  
ATTACTTA 2.81328668817  
ATTACTTC 2.19981284797  
ATTACTTG 1.41291153609  
ATTAGAAA 3.6061103842  
ATTAGAAC 0.138842243318  
ATTAGAAG 1.10305646426  
ATTAGAAT 1.44498619423  
ATTAGACA 1.18977921776  
ATTAGACC 0.706239736157  
ATTAGACG 0.758529908154  
ATTAGAGA 0.213874182271  
ATTAGAGC 0.807550457793  
ATTAGAGG 0.244393881315  
ATTAGATA 4.24105410853  
ATTAGATC 1.55505973381  
ATTAGATG 1.98336092042  
ATTAGCAA 2.30202298367  
ATTAGCAC 0.25097076498  
ATTAGCAG 0.74446522597  
ATTAGCCA -0.127611983137  
ATTAGCCC -0.426015665955  
ATTAGCCG 0.453310438894  
ATTAGCGA 1.82663808503  
ATTAGCGC -0.533212962467  
ATTAGCGG 0.531090282543  
ATTAGCTA -0.187600104455  
ATTAGCTC 1.14801174597  
ATTAGCTG 1.06967751196  
ATTAGGAA 0.51568915627  
ATTAGGAC 0.47230503932

ATTAGGAG 0.0985933985867  
ATTAGGCA -0.0302188488297  
ATTAGGCC 1.38832885857  
ATTAGGCG -0.0236043262154  
ATTAGGGA 0.439449634353  
ATTAGGGC -0.451685690907  
ATTAGGGG 0.153496863759  
ATTAGGTA 1.35324308446  
ATTAGGTC 0.243994490239  
ATTAGGTG 0.347723514382  
ATTAGTAA 1.49257829346  
ATTAGTAC 0.345321156153  
ATTAGTAG 1.21995206343  
ATTAGTCA 1.04282525806  
ATTAGTCC -0.410702102516  
ATTAGTCG 0.63682227384  
ATTAGTGA 0.272860950702  
ATTAGTGC 0.538959959571  
ATTAGTGG 1.65792123244  
ATTAGTTA -0.316734896759  
ATTAGTTC -0.153905141809  
ATTAGTTG 0.629863511667  
ATTATAAA 1.23937271586  
ATTATAAC 1.13590324364  
ATTATAAG 1.62332763987  
ATTATAAT 2.95059828088  
ATTATACA 2.94508469753  
ATTATACC 0.786249426183  
ATTATACG 2.37137013434  
ATTATAGA 2.01332779739  
ATTATAGC 1.88210587306  
ATTATAGG 1.75133509336  
ATTATATA 4.28584681089  
ATTATATC 2.93407844138  
ATTATATG 2.79765031846  
ATTATCAA 2.28504755605  
ATTATCAC 1.79727499954  
ATTATCAG 2.94272964937  
ATTATCCA 2.01332779739  
ATTATCCC 1.71422831677  
ATTATCCG 3.16034289534  
ATTATCGA 1.40607666879  
ATTATCGC 1.36417197166  
ATTATCGG 1.72758753003  
ATTATCTA 2.18763168155  
ATTATCTC 0.578809151845  
ATTATCTG 3.90387289797  
ATTATGAA 2.37134530308  
ATTATGAC 2.61252523632  
ATTATGAG 1.69674502472  
ATTATGCA 1.72495541738  
ATTATGCC 1.74228135771  
ATTATGCG 1.58700997431  
ATTATGGA 2.74370298716

ATTATGGC 2.04820237517  
ATTATGGG 0.575081850317  
ATTATGTA 3.19395656832  
ATTATGTC 1.9399394259  
ATTATGTG 0.332441316734  
ATTATTAA 1.24011530096  
ATTATTAC 3.25216677203  
ATTATTAG 1.42012331564  
ATTATTCA 1.61566706812  
ATTATTCC 3.68449715591  
ATTATTCCG 1.93700724718  
ATTATTGA 2.20235922745  
ATTATTGC 2.86860182935  
ATTATTGG 0.647506507871  
ATTATTTA 2.46471289946  
ATTATTTTC 3.66462379057  
ATTATTTG 1.8079247312  
ATTCAAAA 2.720373373  
ATTCAAAC 1.84109876033  
ATTCAAAG 1.08546522161  
ATTCAAAT 2.70917369447  
ATTCACA 1.64371279038  
ATTCACC 0.432739707457  
ATTCACG 0.2883086029  
ATTCAGA 0.395855105221  
ATTCAGC 1.05282571784  
ATTCAGG 0.35181152251  
ATTCATA 0.960356751382  
ATTCATC 1.89842497149  
ATTCATG 0.722079722126  
ATTCACAA 2.27112140611  
ATTCACAC 0.761085697379  
ATTCACAG 1.40433586738  
ATTCACCA 1.86084143487  
ATTCACCC 0.332882528864  
ATTCACCG 1.44106364066  
ATTCACGA 0.614177740837  
ATTCACGC 1.00908716745  
ATTCACGG 0.968582952904  
ATTCACTA 1.61558551706  
ATTCACTC 0.00411153247147  
ATTCACTG 0.0215545717563  
ATTCAGAA 0.583366601316  
ATTCAGAC 0.588911027685  
ATTCAGAG -0.488534483865  
ATTCAGCA 2.24087615774  
ATTCAGCC 0.192890990678  
ATTCAGCG -0.159177208557  
ATTCAGGA 1.21510369625  
ATTCAGGC 0.068281236528  
ATTCAGGG 0.24023425463  
ATTCAGTA 1.07232739856  
ATTCAGTC 1.32922211598  
ATTCAGTG 1.19369262299



ATTCATAA 1.48064465541  
ATTCATAC 1.01553701966  
ATTCATAG 1.28668069329  
ATTCATCA 1.56347909633  
ATTCATCC 0.0168870806347  
ATTCATCG 0.689730351925  
ATTCATGA 0.480325272147  
ATTCATGC 1.25981118821  
ATTCATGG 1.11461057624  
ATTCATTA 2.44782973955  
ATTCATTC 1.37051700985  
ATTCATTG 0.990846652924  
ATTCACAA 2.82157849647  
ATTCACAAC 2.07646060066  
ATTCACAAG 2.61238147644  
ATTCACAAT 2.3486934514  
ATTCACACA 1.53233678632  
ATTCACACC 1.19175238742  
ATTCACACG 1.74021330654  
ATTCACAGA 1.70880517146  
ATTCACAGC -0.106369762386  
ATTCACAGG 0.854056777881  
ATTCACATA 2.9028705246  
ATTCACATC 1.47002628954  
ATTCACATG 2.35544912007  
ATTCACCAA 3.26294039857  
ATTCACCAC 3.41262527316  
ATTCACCAG 3.2007362841  
ATTCACCCA 2.89040732744  
ATTCACCCC 4.36697652104  
ATTCACCCG 4.55024004347  
ATTCACCGA 3.23350151241  
ATTCACCGC 0.641425726471  
ATTCACCGG 2.78911751633  
ATTCACCTA 4.389252506  
ATTCACCTC 4.5659088245  
ATTCACCTG 3.75340779932  
ATTCACGAA 1.67869793257  
ATTCACGAC 2.1314568563  
ATTCACGAG 2.710711141  
ATTCACGCA 3.85776806001  
ATTCACGCC 1.71577334337  
ATTCACGCG 3.17349143504  
ATTCACCGA 2.59001191688  
ATTCACGGC 1.5561248638  
ATTCACGGG 1.19085035953  
ATTCACGTA 3.63902460003  
ATTCACGTC 2.7858092095  
ATTCACGTG 3.87136460776  
ATTCACCTAA 2.5301424628  
ATTCACCTAC 2.01413442099  
ATTCACCTAG 2.0786768552  
ATTCACCTCA 2.32760779822  
ATTCACCTCC 1.90452927723

ATTCCTCG 3.29693673419  
ATTCCTGA 2.3343548413  
ATTCCTGC 1.9074920376  
ATTCCTGG 0.684648832359  
ATTCCTTA 3.248662429  
ATTCCTTC 0.943397790809  
ATTCCTTG 0.463001945632  
ATTCGAAA 2.10651294942  
ATTCGAAC 1.09413028283  
ATTCGAAG 0.6479179225  
ATTCGAAT 3.838244946  
ATTCGACA 1.68481060253  
ATTCGACC 0.47206718207  
ATTCGACG 2.06154747383  
ATTCGAGA 1.46957880426  
ATTCGAGC 1.82390403355  
ATTCGAGG 0.474031987511  
ATTCGATA 3.52865909722  
ATTCGATC 2.5898184945  
ATTCGATG 1.46165502124  
ATTCGCAA 3.50121455263  
ATTCGCAC 3.04477563743  
ATTCGCAG 2.11935462712  
ATTCGCCA 3.56810393217  
ATTCGCCC 1.63775119898  
ATTCGCCG 1.64557800943  
ATTCGCGA 3.92663113197  
ATTCGCGC 2.09499281705  
ATTCGCGG 2.84685775594  
ATTCGCTA 2.04871991073  
ATTCGCTC 2.95356313229  
ATTCGCTG 2.34768242739  
ATTCGGAA 2.25753557501  
ATTCGGAC 0.305904289035  
ATTCGGAG 2.16754189224  
ATTCGGCA 1.10788575059  
ATTCGGCC 0.0256245445544  
ATTCGGCG 0.641405600089  
ATTCGGGA 2.81824326734  
ATTCGGGC 1.33032776013  
ATTCGGGG 1.25863758485  
ATTCGGTA 2.6064021111  
ATTCGGTC 1.93295008208  
ATTCGGTG 1.3159057693  
ATTCGTAA 2.15776569787  
ATTCGTAC 1.30153971414  
ATTCGTAG 0.795448751379  
ATTCGTCA 1.28437347796  
ATTCGTCC 0.113609509773  
ATTCGTCT 2.4684046531  
ATTCGTGA 2.02892548262  
ATTCGTGC 0.338247124697  
ATTCGTGG 1.19516707656  
ATTCGTTA 2.76237556546

ATTCGTTTC 1.56477764008  
ATTCGTTG 0.99649066568  
ATTCTAAA 2.38786827916  
ATTCTAAC 0.766117293061  
ATTCTAAG 3.25015805448  
ATTCTACA 2.51609581595  
ATTCTACC 1.89776053948  
ATTCTACG 1.04637168353  
ATTCTAGA 1.29598796909  
ATTCTAGC 1.44894429571  
ATTCTAGG 2.56524339704  
ATTCTATA 4.70482530019  
ATTCTATC 4.2150955183  
ATTCTATG 1.5544122916  
ATTCTCAA 3.36091197034  
ATTCTCAC 2.62382633091  
ATTCTCAG 4.2416665256  
ATTCTCCA 2.79057158214  
ATTCTCCC 2.01080651054  
ATTCTCCG 4.15600079927  
ATTCTCGA 4.75851752306  
ATTCTCGC 0.66293638612  
ATTCTCGG 2.73050243253  
ATTCTCTA 4.87905939546  
ATTCTCTC 2.2852854133  
ATTCTCTG 4.40635784026  
ATTCTGAA 2.96382183709  
ATTCTGAC 1.95574647779  
ATTCTGAG 2.18467989921  
ATTCTGCA 3.83602555489  
ATTCTGCC 1.03610043241  
ATTCTGCG 2.64545252123  
ATTCTGGA 2.15689268335  
ATTCTGGC 1.19577008389  
ATTCTGGG 1.29295829503  
ATTCTGTA 5.98760774839  
ATTCTGTC 2.93499432249  
ATTCTGTG 4.45031595119  
ATTCTTAA 3.87622395297  
ATTCTTAC 0.559791027076  
ATTCTTAG 2.91002610711  
ATTCTTCA 2.51224801751  
ATTCTTCC 1.97658015911  
ATTCTTCG 2.1647534734  
ATTCTTGA 2.41294705894  
ATTCTTGC 1.61911913483  
ATTCTTGG 2.92742235909  
ATTCTTTA 2.17555428362  
ATTCTTTC 2.34121584676  
ATTCTTTG 4.2784366427  
ATTGAAAA 2.03730772896  
ATTGAAAC -0.143629708591  
ATTGAAAG 0.886175086754  
ATTGAAAT 3.54294203303

ATTGAACA 1.05690170242  
ATTGAACC 0.524407277952  
ATTGAACG -0.266712210088  
ATTGAAGA 1.60383327784  
ATTGAAGC -0.726281169866  
ATTGAAGG 0.609011795016  
ATTGAATA 2.35292914012  
ATTGAATC 1.83316582895  
ATTGAATG 0.263287327064  
ATTGACAA 1.39386518211  
ATTGACAC 0.737811496116  
ATTGACAG 1.25199509441  
ATTGACCA 0.229461412239  
ATTGACCC -0.234006576775  
ATTGACCG 0.158760043533  
ATTGACGA -0.734592059025  
ATTGACGC 0.812939623496  
ATTGACGG 0.93994598548  
ATTGACTA -0.233101673697  
ATTGACTC 0.130956360631  
ATTGACTG -0.196665340894  
ATTGAGAA 2.02892548262  
ATTGAGAC -0.0957926948085  
ATTGAGAG 0.58160436661  
ATTGAGCA 0.460863844194  
ATTGAGCC -0.955884250929  
ATTGAGCG -0.471826188241  
ATTGAGGA 0.586860489081  
ATTGAGGC -0.990892917466  
ATTGAGGG -0.588788439718  
ATTGAGTA -0.0918460941228  
ATTGAGTC 1.60931366572  
ATTGAGTG 0.789736256645  
ATTGATAA 1.71779983487  
ATTGATAC 1.93163533266  
ATTGATAG 1.28284021353  
ATTGATCA -0.0653893105735  
ATTGATCC 0.373376288149  
ATTGATCG -0.141083851867  
ATTGATGA 0.215620472699  
ATTGATGC 0.912796802089  
ATTGATGG -0.172712854395  
ATTGATTA 1.69754746621  
ATTGATTC 2.54708783153  
ATTGATTG 1.726505933  
ATTGCAAA 1.58447509562  
ATTGCAAC 1.91609959487  
ATTGCAAG 0.804625597758  
ATTGCAAT 3.63936282781  
ATTGCACA 2.55178851812  
ATTGCACC 2.03497332994  
ATTGCACG 2.33817179672  
ATTGCAGA 1.91387053264  
ATTGCAGC 1.08524017206

ATTGCAGG 2.37216081366  
ATTGCATA 3.02269987078  
ATTGCATC 1.97605739592  
ATTGCATG 2.02604558022  
ATTGCCAA -0.248631922478  
ATTGCCAC 0.440980023586  
ATTGCCAG 1.83340211791  
ATTGCCCA 0.761670669386  
ATTGCCCC 0.578383883992  
ATTGCCCG 2.95464289966  
ATTGCCGA 1.57927909091  
ATTGCCGC 1.14410435253  
ATTGCCGG 0.69054455559  
ATTGCCTA -0.14620091933  
ATTGCCTC 1.40122072154  
ATTGCCTG 0.89812127112  
ATTGCGAA 3.28001436704  
ATTGCGAC 3.82740074644  
ATTGCGAG 3.03246090502  
ATTGCGCA 4.32540822203  
ATTGCGCC 1.88701252834  
ATTGCGCG 3.6592241696  
ATTGCGGA 4.7837729968  
ATTGCGGC 0.529069018678  
ATTGCGGG 3.10002700151  
ATTGCGTA 5.24010396139  
ATTGCGTC 2.37543540226  
ATTGCGTG 4.38417595268  
ATTGCTAA 3.92083159716  
ATTGCTAC 1.9461621375  
ATTGCTAG 1.36551834825  
ATTGCTCA 0.579421830301  
ATTGCTCC 1.2345125865  
ATTGCTCG 0.956221955948  
ATTGCTGA 0.860201075008  
ATTGCTGC 0.823733637796  
ATTGCTGG 0.697690205603  
ATTGCTTA 2.53814309201  
ATTGCTTC 0.85634255992  
ATTGCTTG 1.13204106921  
ATTGAAA -0.0289767634957  
ATTGAAAC 0.795954002  
ATTGAAAG 0.235016555253  
ATTGACA 0.144764627472  
ATTGACC -0.239705218284  
ATTGACG 0.173843852552  
ATTGAGA 0.520936391767  
ATTGAGC 0.550861709066  
ATTGAGG -0.352014093246  
ATTGATA 4.53483368957  
ATTGATC 2.0708976162  
ATTGATG 0.62271394093  
ATTGCAA -0.20980055013  
ATTGCAC -0.00788143919975

ATTGGCAG -0.561329519137  
ATTGGCCA -0.593454885313  
ATTGGCCC -0.147545204867  
ATTGGCCG 0.06254181949  
ATTGGCGA 0.695760163914  
ATTGGCGC 0.369579720498  
ATTGGCGG 0.941292623452  
ATTGGCTA 0.306061117992  
ATTGGCTC -0.681315171511  
ATTGGCTG 0.89092203788  
ATTGGGAA 1.88801179017  
ATTGGGAC -0.252888521734  
ATTGGGAG 0.542602312082  
ATTGGGCA -0.98408131313  
ATTGGGCC -1.17473644565  
ATTGGGCG -0.659491899476  
ATTGGGGA 0.514760728848  
ATTGGGGC 0.649933697352  
ATTGGGGG -0.690953356403  
ATTGGGTA 2.22355152432  
ATTGGGTC 0.438268450931  
ATTGGGTG 0.653109483717  
ATTGGTAA 0.874376321607  
ATTGGTAC 0.880518527681  
ATTGGTAG -0.200016252927  
ATTGGTCA 0.252601786125  
ATTGGTCC -0.0433728775409  
ATTGGTCG 0.857174276151  
ATTGGTGA 1.02335598866  
ATTGGTGC 0.644009222145  
ATTGGTGG -0.465728678419  
ATTGGTTA 0.803955415351  
ATTGGTTC 0.273682473052  
ATTGGTTG 1.38418439201  
ATTGTAAC 0.354374107657  
ATTGTAAG 0.582059954728  
ATTGTACA 1.11301510299  
ATTGTACC 0.999179759518  
ATTGTACG 0.226171663499  
ATTGTAGA 2.07001310089  
ATTGTAGC 1.41189972794  
ATTGTAGG 0.637236825048  
ATTGTATA 0.991887213049  
ATTGTATC 1.81078450721  
ATTGTATG 1.41051518964  
ATTGTCAA 0.175795588913  
ATTGTCAC 0.458852774211  
ATTGTCAG 1.07999110689  
ATTGTCCA 2.45602091594  
ATTGTCCC 0.677771359861  
ATTGTCCG 1.23902664663  
ATTGTCGA 1.03482645853  
ATTGTCGC 1.06684831759

ATTGTCGG 0.570701617567  
ATTGTCTA 1.84840803522  
ATTGTCTC 1.79851891454  
ATTGTCTG -0.97905494508  
ATTGTGAA 1.31622413208  
ATTGTGAC 1.65700378304  
ATTGTGAG 1.05663666148  
ATTGTGCA 2.00400117936  
ATTGTGCC 1.19491066121  
ATTGTGCG 1.84535248438  
ATTGTGGA 1.32972762799  
ATTGTGGC 1.39306143371  
ATTGTGGG 1.16557240697  
ATTGTGTA 2.81111722094  
ATTGTGTC 2.06620581659  
ATTGTGTG 1.31475098542  
ATTGTTAA 2.2431091407  
ATTGTTAC 0.720017944114  
ATTGTTAG 1.63758809687  
ATTGTTCA 0.523010193332  
ATTGTTCC 2.43894903852  
ATTGTTCG 1.07552853894  
ATTGTTGA -0.166419308378  
ATTGTTGC 1.07368135522  
ATTGTTGG 1.30078223028  
ATTGTTTA 0.698886026395  
ATTGTTTC 0.985241847407  
ATTGTTTG 0.987479012469  
ATTTAAAA 2.95464289966  
ATTTAAAC 0.95984967109  
ATTTAAAG 2.47003149214  
ATTTAAAT 3.12195378065  
ATTTAACA 2.84031981814  
ATTTAACC 0.950649561749  
ATTTAACG 1.07435389006  
ATTTAAGA 2.21534492642  
ATTTAAGC 0.725591122458  
ATTTAAGG 0.839531018566  
ATTTAATA 1.07388575562  
ATTTAATC 1.64826605774  
ATTTAATG 1.67592101452  
ATTTACAA 2.91976335563  
ATTTACAC 2.42764010248  
ATTTACAG 1.03254590412  
ATTTACCA 1.16928036626  
ATTTACCC 1.21753323816  
ATTTACCG 1.42051538804  
ATTTACGA 2.94766244281  
ATTTACGC 1.62037193681  
ATTTACGG 0.615133874708  
ATTTACTA 3.68463621092  
ATTTACTC 1.57170817304  
ATTTACTG 2.11280754096  
ATTTAGAA 3.94647077909

ATTTAGAC 2.23834127905  
ATTTAGAG 0.746611430237  
ATTTAGCA 2.37496700645  
ATTTAGCC -0.351187081883  
ATTTAGCG 2.69763003776  
ATTTAGGA 1.19389859168  
ATTTAGGC 0.729574055186  
ATTTAGGG 0.835011208045  
ATTTAGTA 3.21962790018  
ATTTAGTC 1.10859775405  
ATTTAGTG 0.592916177848  
ATTTATAA 1.96624565365  
ATTTATAC 2.62786964279  
ATTTATAG 2.35743614295  
ATTTATCA 1.5178068449  
ATTTATCC 0.910725614339  
ATTTATCG 2.08573729481  
ATTTATGA 1.47755564774  
ATTTATGC 1.50810592843  
ATTTATGG 0.776818255513  
ATTTATTA 2.71707787387  
ATTTATTC 0.89419531958  
ATTTATTG 2.29446304383  
ATTTCAAA 4.14403579543  
ATTTCAAC 1.74374300359  
ATTTCAAG 2.37661684707  
ATTTCACA 2.27435312814  
ATTTCACC 0.77612245771  
ATTTCACG 1.89600248688  
ATTTCAGA 4.07301841637  
ATTTCAGC 3.18394460774  
ATTTCAGG 2.38950086859  
ATTTCATA 3.23478698709  
ATTTCATC 1.78979321279  
ATTTCATG 3.47996997944  
ATTTCCAA 3.05059712829  
ATTTCCAC 3.97471149201  
ATTTCCAG 4.46856221612  
ATTTCCCA 2.72385837379  
ATTTCCCC 1.94038978639  
ATTTCCCG 3.3850056029  
ATTTCCGA 3.46596123292  
ATTTCCGC 2.46008539973  
ATTTCCGG 3.50794120794  
ATTTCCTA 4.98964942506  
ATTTCCTC 1.41716787396  
ATTTCCTG 4.86038916959  
ATTTCGAA 3.4300149906  
ATTTCGAC 1.23851982772  
ATTTCGAG 1.55632612763  
ATTTCGCA 2.07720004919  
ATTTCGCC 1.35348721487  
ATTTCGCG 3.02956009209  
ATTTCGGA 2.91313132045



ATTTCCGC 3.32853515507  
ATTTCCGG 1.24250380597  
ATTTCCGTA 6.08686453346  
ATTTCCGTC 3.25127389251  
ATTTCCGTG 4.20754577234  
ATTTCTAA 5.23767258981  
ATTTCTAC 1.48845316915  
ATTTCTAG 2.61701786316  
ATTTCTCA 1.85019431703  
ATTTCTCC 3.6611824405  
ATTTCTCG 3.32940660131  
ATTTCTGA 2.04835946551  
ATTTCTGC 1.95406527138  
ATTTCTGG 2.12487840435  
ATTTCTTA 2.77460116675  
ATTTCTTC 2.06941688947  
ATTTCTTG 1.28540985598  
ATTTGAAA 2.54052401695  
ATTTGAAC 1.75356284869  
ATTTGAAG 1.2970272223  
ATTTGACA 2.45406996373  
ATTTGACC 1.16474774805  
ATTTGACG 1.55091134653  
ATTTGAGA 1.92025190287  
ATTTGAGC 0.115737940091  
ATTTGAGG 1.27625522704  
ATTTGATA 1.73555810036  
ATTTGATC 2.03395603278  
ATTTGATG 0.976879727456  
ATTTGCAA 3.62679612354  
ATTTGCAC 2.52787262504  
ATTTGCAG 3.37123131567  
ATTTGCCA 3.5966640534  
ATTTGCCC 2.56986619191  
ATTTGCCG 1.25971709083  
ATTTGCGA 4.65377381557  
ATTTGCGC 3.71144402995  
ATTTGCGG 1.71300191433  
ATTTGCTA 1.48649228443  
ATTTGCTC 4.12112778978  
ATTTGCTG 3.03323668559  
ATTTGGAA 1.62931615357  
ATTTGGAC 0.78975350783  
ATTTGGAG 0.792802262741  
ATTTGGCA 0.583380715922  
ATTTGGCC 0.529029550057  
ATTTGGCG 1.27471516669  
ATTTGGGA 2.28833625927  
ATTTGGGC 1.46633584282  
ATTTGGGG 0.99950308855  
ATTTGGTA 1.23666271149  
ATTTGGTC 2.89613419816  
ATTTGGTG 3.03917841198  
ATTTGTAA 4.2060140762

ATTTGTAC 3.53183775878  
ATTTGTAG 1.67606503578  
ATTTGTCA 2.77901328806  
ATTTGTCC 1.41779858775  
ATTTGTCCG 2.17445386711  
ATTTGTGA 2.1363263954  
ATTTGTGC 0.740105119602  
ATTTGTGG 1.43758857236  
ATTTGTGA 3.03769428729  
ATTTGTTC 1.21635963481  
ATTTGTTG 2.56573322615  
ATTTTAAA 2.66806856363  
ATTTTAAC 2.45741617089  
ATTTTAAG 3.22854441049  
ATTTTACA 4.29044085378  
ATTTTACC 1.58124206668  
ATTTTACG 3.66955710677  
ATTTTAGA 2.36079489643  
ATTTTAGC 1.4039393515  
ATTTTAGG 1.71606217003  
ATTTTATA 4.15433971924  
ATTTTATC 2.34077829397  
ATTTTATG 1.32664855281  
ATTTTCAA 1.75716520981  
ATTTTCAC 4.3091529007  
ATTTTCAG 2.92446717879  
ATTTTCCA 2.50634236177  
ATTTTCCC 3.78206306345  
ATTTTCCG 4.53051958636  
ATTTTCGA 4.02343641907  
ATTTTCGC 2.88794824941  
ATTTTCGG 4.0060357236  
ATTTTCTA 4.29422121577  
ATTTTCTC 4.01660494973  
ATTTTCTG 1.63456600288  
ATTTTGAA 4.07475974055  
ATTTTGAC 2.84999459645  
ATTTTGAG 1.94144419974  
ATTTTGCA 2.99083954554  
ATTTTGCC 1.06821691162  
ATTTTGCG 2.86775469161  
ATTTTGGA 1.43284266677  
ATTTTGGC 2.35162040248  
ATTTTGGG 2.64660991892  
ATTTTGTA 3.00330823171  
ATTTTGTC 4.40635784026  
ATTTTGTG 3.54007807491  
ATTTTTAA 2.68497969138  
ATTTTTAC 3.37088681473  
ATTTTTAG 2.52148602718  
ATTTTTCA 1.00928215812  
ATTTTTCC 2.65448116424  
ATTTTTCCG 1.60333717557  
ATTTTTGA 1.69375534205

ATTTTTGC 0.989480411333  
ATTTTTGG 2.75631856979  
ATTTTTTA 3.75136640907  
ATTTTTTC 4.17660603307  
ATTTTTTG 4.33622706758  
CAAAAAAA 2.9870442848  
CAAAAAAC 1.57491637073  
CAAAAAAG 0.825452483157  
CAAAAACA 0.899789408452  
CAAAAACC 2.04593515122  
CAAAAACG 1.02831910237  
CAAAAAGA 0.402975139838  
CAAAAAGC -0.8005195543  
CAAAAAGG 0.110122940692  
CAAAAATA 1.70600472906  
CAAAAATC 6.51348242261  
CAAAAATG -0.0435095801144  
CAAAACAA 0.984658182308  
CAAAACAC 0.0527107349816  
CAAAACAG 0.975637119359  
CAAAACCA -0.414531342866  
CAAAACCC -0.148598049927  
CAAAACCG 0.168382022767  
CAAAACGA 1.1054431396  
CAAAACGC 0.0628316916776  
CAAAACGG 0.480399504519  
CAAAACTA 0.503966453167  
CAAAACTC 0.192458926904  
CAAAACTG -0.186625412492  
CAAAAGAA 0.415862297942  
CAAAAGAC -0.170110800628  
CAAAAGAG -0.481697002751  
CAAAAGCA -0.609311338323  
CAAAAGCC 0.628383830464  
CAAAAGCG -0.431731297268  
CAAAAGGA 0.627545318311  
CAAAAGGC -0.336781819482  
CAAAAGGG 0.113039697898  
CAAAAGTA 0.728453250911  
CAAAAGTC -0.158752724849  
CAAAAGTG -0.367076468974  
CAAAATAA 1.67875622067  
CAAAATAC 2.82754113339  
CAAAATAG 2.41551042824  
CAAAATCA 4.82881950069  
CAAAATCC 7.82338948434  
CAAAATCG 7.7317807247  
CAAAATGA 0.362591160823  
CAAAATGC 0.477784904436  
CAAAATGG 0.366653292173  
CAAAATTA 1.41493541377  
CAAAATTC 2.75464860279  
CAAAATTG 1.27793225135  
CAAACAAA 1.25291907834

CAAACAAC 0.909351269918  
CAAACAAG 0.3937394826  
CAAACACA 0.370637009045  
CAAACACC -0.0637812910081  
CAAACACG 0.358647435335  
CAAACAGA 0.645671609082  
CAAACAGC 0.401288705794  
CAAACAGG -0.85540785934  
CAAACATA 1.68624924682  
CAAACATC 0.0520196420474  
CAAACATG -0.379679766666  
CAAACCAA 1.64928021833  
CAAACCAC -0.458753449205  
CAAACCAG -0.007939204532  
CAAACCCA 0.337989925208  
CAAACCCC -0.472830677706  
CAAACCCG -0.265075961311  
CAAACCGA 0.410617414879  
CAAACCGC -0.480645725981  
CAAACCGG 0.86824195698  
CAAACCTA -0.37948033251  
CAAACCTC -0.27713088042  
CAAACCTG -0.768212005154  
CAAACGAA 1.08422601148  
CAAACGAC 0.535957730584  
CAAACGAG 0.797230589704  
CAAACGCA -0.258686226867  
CAAACGCC -0.671858385445  
CAAACGCG -0.777345984951  
CAAACGGA 0.0672087878484  
CAAACGGC -0.624343916549  
CAAACGGG 0.755382351001  
CAAACGTA 1.27726651243  
CAAACGTC 0.173414663975  
CAAACGTG 0.328555356578  
CAAACCTAA 1.20222202716  
CAAACCTAC 1.00126793707  
CAAACCTAG 0.348283132375  
CAAACCTCA 0.48762670559  
CAAACCTCC 0.0103156859834  
CAAACCTCG -0.316650209122  
CAAACCTGA -0.41468451248  
CAAACCTGC -0.0138239497362  
CAAACCTGG 0.0649407797585  
CAAACCTTA 1.31579964838  
CAAACCTTC -0.013937389348  
CAAACCTTG 0.258124517822  
CAAAGAAA 0.0805233048582  
CAAAGAAC 0.841361735249  
CAAAGAAG -0.0345836600656  
CAAAGACA 0.400137581255  
CAAAGACC 0.176546538233  
CAAAGACG -0.915265289861  
CAAAGAGA -0.348423755672

CAAAGAGC -0.923557882308  
CAAAGAGG -0.18708753515  
CAAAGATA 1.37227950594  
CAAAGATC 6.14770292911  
CAAAGATG 0.289869312397  
CAAAGCAA 1.22278491715  
CAAAGCAC -0.690517110523  
CAAAGCAG -0.123308335194  
CAAAGCCA -0.626869908272  
CAAAGCCC -1.1011117852  
CAAAGCCG -0.349936632338  
CAAAGCGA -0.410061717611  
CAAAGCGC -0.778302902966  
CAAAGCGG 0.0772063724321  
CAAAGCTA 1.077240327  
CAAAGCTC -0.693234956336  
CAAAGCTG -1.33463428327  
CAAAGGAA 0.920347070809  
CAAAGGAC 0.108266608612  
CAAAGGAG -0.811295271889  
CAAAGGCA -0.776809891302  
CAAAGGCC -1.61854906157  
CAAAGGCG -0.714019759298  
CAAAGGGA -0.602577102939  
CAAAGGGC -0.90193744239  
CAAAGGGG 0.298386693014  
CAAAGGTA -0.0535531678586  
CAAAGGTC -1.03154847196  
CAAAGGTG -0.68366839  
CAAAGTAA 1.24978223783  
CAAAGTAC -0.0857660968679  
CAAAGTAG -0.903863301974  
CAAAGTCA -0.188384510619  
CAAAGTCC -0.335526926449  
CAAAGTCG -0.582591866272  
CAAAGTGA 0.274819221604  
CAAAGTGC -0.301779164721  
CAAAGTGG -0.293236430089  
CAAAGTTA 0.687891009649  
CAAAGTTC 0.441005638982  
CAAAGTTG -0.453785107869  
CAAATAAA 1.97362550157  
CAAATAAC 1.02829610078  
CAAATAAG 0.848513919802  
CAAATACA 2.44782973955  
CAAATACC 1.60461637709  
CAAATACG 2.80712540124  
CAAATAGA 2.03395603278  
CAAATAGC 0.426835620015  
CAAATAGG 0.681057972022  
CAAATATA 2.70634632977  
CAAATATC 6.23375863678  
CAAATATG 1.59186748985  
CAAATCAA 3.30830239004

CAAATCAC 3.10366438777  
CAAATCAG 3.9328222164  
CAAATCCA 5.91625370985  
CAAATCCC 5.2154954071  
CAAATCCG 7.14747733175  
CAAATCGA 3.05543843817  
CAAATCGC 6.01939802336  
CAAATCGG 3.94385042861  
CAAATCTA 10.2618398068  
CAAATCTC 12.4428438966  
CAAATCTG 8.84121411571  
CAAATGAA 2.24656434399  
CAAATGAC 0.164116013773  
CAAATGAG 0.752765398483  
CAAATGCA -0.0514571488575  
CAAATGCC 0.295665449241  
CAAATGCG 1.16849622148  
CAAATGGA -0.328141850896  
CAAATGGC -0.05610346807  
CAAATGGG -0.373017149839  
CAAATGTA 0.0350180762746  
CAAATGTC 0.9876972661  
CAAATGTG 0.500724537258  
CAAATTTAA 0.546699991329  
CAAATTAC 4.27946230408  
CAAATTAG 1.29474326994  
CAAATTCA 1.79713699005  
CAAATTCC 1.01509685306  
CAAATTCCG 2.13782045259  
CAAATTGA 0.150093152644  
CAAATTGC 1.74444533593  
CAAATTGG 0.512312106077  
CAAATTTA 0.879397984788  
CAAATTTTC 2.59309569692  
CAAATTTTG 2.93493629577  
CAACAAAA 2.27040757298  
CAACAAAC 0.770388791067  
CAACAAAG 0.985532503739  
CAACAACA 0.421000537314  
CAACAACC -0.542292574893  
CAACAACG 0.656721515963  
CAACAAGA 0.256419525685  
CAACAAGC -0.32440017338  
CAACAAGG 1.20634610595  
CAACAATA 1.3593403329  
CAACAATC 2.19662346976  
CAACAATG 0.709930182881  
CAACACAA 0.851983237697  
CAACACAC -0.33055963064  
CAACACAG -0.144337007184  
CAACACCA -0.0606295517493  
CAACACCC -0.714258662075  
CAACACCG -0.338173415087  
CAACACGA 0.718412799746

CAACACGC 0.436111268637  
CAACACGG 0.578511699592  
CAACACTA 1.17638184279  
CAACACTC 0.924391689592  
CAACACTG 0.192103186554  
CAACAGAA 0.101489506647  
CAACAGAC -1.11268131869  
CAACAGAG 0.233752513865  
CAACAGCA 0.223843537642  
CAACAGCC -1.26272010396  
CAACAGCG 0.0487970683767  
CAACAGGA -0.0524561493092  
CAACAGGC -0.939247051098  
CAACAGGG -0.227235747967  
CAACAGTA 0.84923350333  
CAACAGTC -0.616467182218  
CAACAGTG -0.497378852857  
CAACATAA 0.717843772016  
CAACATAC 1.66196349879  
CAACATAG 0.301847646699  
CAACATCA 0.947239054712  
CAACATCC 2.0019386172  
CAACATCG -0.163349381558  
CAACATGA 0.919864560387  
CAACATGC 0.4395654264  
CAACATGG -0.368461791421  
CAACATTA 0.160216984538  
CAACATTC 0.160207052037  
CAACATTG 0.686585669969  
CAACCAA 0.825566445532  
CAACCAAC 0.732691030693  
CAACCAAG -0.0789568449662  
CAACCACA 0.0969639457306  
CAACCACC -0.159496878246  
CAACCACG 0.830006796048  
CAACCAGA 0.385932537155  
CAACCAGC -0.722241255951  
CAACCAGG 0.0142311822595  
CAACCATA 0.206367041513  
CAACCATC 0.217973429807  
CAACCATG -0.843574853204  
CAACCCAA 1.38871308951  
CAACCCAC 0.238093016613  
CAACCCAG -0.352050686669  
CAACCCCA 0.0987510116878  
CAACCCCC -1.00654862941  
CAACCCCG -0.728095680891  
CAACCCGA -0.0725841003262  
CAACCCGC 0.05163959321  
CAACCCGG -0.816712928185  
CAACCCTA 1.10591963824  
CAACCCTC -0.724251803171  
CAACCCTG -0.339267035676  
CAACCGAA 0.223034038846

CAACCGAC -0.13758813443  
CAACCGAG -0.0383865008747  
CAACCGCA 0.0296422410336  
CAACCGCC -0.667598910991  
CAACCGCG 0.311417872376  
CAACCGGA 0.390893559806  
CAACCGGC 0.267843208245  
CAACCGGG -0.337548713078  
CAACCGTA -0.809030923141  
CAACCGTC 0.710271024479  
CAACCGTG 0.127758095448  
CAACCTAA -0.392313907387  
CAACCTAC -0.402733100482  
CAACCTAG -0.989150547762  
CAACCTCA 0.0566408686269  
CAACCTCC -1.09295092908  
CAACCTCG -0.903076543376  
CAACCTGA 0.451294664043  
CAACCTGC -0.809608837845  
CAACCTGG -0.991288126436  
CAACCTTA 0.661690641444  
CAACCTTC -0.972724021495  
CAACCTTG -0.46431355847  
CAACGAAA 0.282367922034  
CAACGAAC -0.534006255605  
CAACGAAG -0.456086834184  
CAACGACA 1.00108915206  
CAACGACC -0.695555763508  
CAACGACG 0.568986954311  
CAACGAGA 0.194388707211  
CAACGAGC -0.797142242726  
CAACGAGG -0.871859739621  
CAACGATA 1.41499161081  
CAACGATC 1.71616567714  
CAACGATG -0.411593936514  
CAACGCAA 1.13777029236  
CAACGCAC -0.982394356323  
CAACGCAG -0.681037061495  
CAACGCCA 1.44204878788  
CAACGCCC -0.917427961169  
CAACGCCG -0.936900889912  
CAACGCGA -0.106940097024  
CAACGCGC 0.545453462508  
CAACGCGG -0.669824575263  
CAACGCTA -0.129797917407  
CAACGCTC -0.870262698083  
CAACGCTG -0.351404551369  
CAACGGAA 0.258164247824  
CAACGGAC -0.298231693729  
CAACGGAG -0.61125915396  
CAACGGCA -0.376040812117  
CAACGGCC -0.830064038618  
CAACGGCG -0.547380106236  
CAACGGGA 0.423087407959



CAACGGGC -1.32502589588  
CAACGGGG 0.615571950259  
CAACGGTA 0.554854574294  
CAACGGTC -0.822514031279  
CAACGGTG -1.13760196261  
CAACGTAA 1.8035664545  
CAACGTAC -0.223968739425  
CAACGTAG 1.45331720978  
CAACGTCA 0.56018205394  
CAACGTCC -0.490589727338  
CAACGTCCG -0.146860646473  
CAACGTGA -0.801204635458  
CAACGTGC -0.59449570682  
CAACGTGG -0.610423255623  
CAACGTTA 0.154244415118  
CAACGTTC -0.586954325073  
CAACGTTG 0.666614547909  
CAACTAAA 0.911656394195  
CAACTAAC 1.0789061119  
CAACTAAG -0.402515108233  
CAACTACA 0.46910050098  
CAACTACC -0.348170999671  
CAACTACG 0.242734369575  
CAACTAGA 0.496202635684  
CAACTAGC 0.108311304865  
CAACTAGG 0.516391227231  
CAACTATA -0.191867420357  
CAACTATC 0.130854421809  
CAACTATG 0.440481046123  
CAACTCAA 0.278621801031  
CAACTCAC -0.217050752781  
CAACTCAG -0.0173492032927  
CAACTCCA -0.58223900112  
CAACTCCC -0.311955272933  
CAACTCCG -1.12932897379  
CAACTCGA -0.201133136478  
CAACTCGC -0.718744492989  
CAACTCGG -0.14364591425  
CAACTCTA -0.342628664355  
CAACTCTC 0.478870422195  
CAACTCTG -0.747400279887  
CAACTGAA 0.273528519293  
CAACTGAC -0.704615510933  
CAACTGAG -0.375378732539  
CAACTGCA 1.21083638035  
CAACTGCC 0.167690407069  
CAACTGCG -0.268066166745  
CAACTGGA -0.446739567006  
CAACTGGC -0.237551433951  
CAACTGGG -0.882868609591  
CAACTGTA -0.375713039598  
CAACTGTC -1.03549245883  
CAACTGTG -0.310946862744  
CAACTTAA -0.246705017368

CAACTTAC 0.390560036893  
CAACTTAG 1.01807346665  
CAACTTCA 0.755652619569  
CAACTTCC -0.0119341608126  
CAACTTCG 1.43034438149  
CAACTTGA 0.211896569131  
CAACTTGC 1.17064138022  
CAACTTGG -0.755078102825  
CAACTTTA 0.246451999985  
CAACTTTC 0.892085708736  
CAAGAAAA 0.713741910664  
CAAGAAAC 1.4979172739  
CAAGAAAG -0.217577175311  
CAAGAACA 0.556361961946  
CAAGAACC -1.33567092267  
CAAGAACG -1.28695906469  
CAAGAAGA 0.194249390822  
CAAGAAGC -1.09420137862  
CAAGAAGG -1.12436716699  
CAAGAATA 1.6091476884  
CAAGAATC 8.27987048196  
CAAGAATG -0.338041940146  
CAAGACAA -0.264346706664  
CAAGACAC -0.976735444816  
CAAGACAG -0.744163330229  
CAAGACCA -1.00918335588  
CAAGACCC -1.39482575946  
CAAGACCG -0.231759217831  
CAAGACGA 0.784399367262  
CAAGACGC -0.231999166134  
CAAGACGG -0.401805718587  
CAAGACTA -0.502793372573  
CAAGACTC -0.357283546178  
CAAGACTG 0.387949357533  
CAAGAGAA 1.74438234296  
CAAGAGAC -0.271855938474  
CAAGAGAG -0.318683235159  
CAAGAGCA -0.321624823617  
CAAGAGCC -1.26721063975  
CAAGAGCG 0.572621726756  
CAAGAGGA -0.0858808433876  
CAAGAGGC -1.46103162614  
CAAGAGGG -0.353754110516  
CAAGAGTA 0.246939738039  
CAAGAGTC -0.771598465084  
CAAGAGTG -0.303994112347  
CAAGATAA 0.963544038537  
CAAGATAC 3.84276240409  
CAAGATAG 0.529216437897  
CAAGATCA 2.14693901087  
CAAGATCC 4.31643629882  
CAAGATCG 4.05707884402  
CAAGATGA 1.50780690788  
CAAGATGC 0.119026381924

CAAGATGG -0.0595137137251  
CAAGATTA 4.27658083338  
CAAGATTC 8.92032282338  
CAAGATTG 3.7350081034  
CAAGCAAA -0.064339340711  
CAAGCAAC 0.214385444668  
CAAGCAAG -0.338996505726  
CAAGCACA -0.161792331404  
CAAGCACC -0.722659989265  
CAAGCACG -0.066640805645  
CAAGCAGA 1.28011086693  
CAAGCAGC -0.333527618638  
CAAGCAGG -0.071427748155  
CAAGCATA 2.04778102804  
CAAGCATC 0.752522313601  
CAAGCATG -0.674467496515  
CAAGCCAA -0.390314599576  
CAAGCCAC -1.009079326  
CAAGCCAG -0.909385249526  
CAAGCCCA -0.990543973038  
CAAGCCCC -0.805716604531  
CAAGCCCG -0.751441239328  
CAAGCCGA -1.00664324955  
CAAGCCGC -1.13142577693  
CAAGCCGG -0.684077974958  
CAAGCCTA -0.295049634205  
CAAGCCTC -1.08326778655  
CAAGCCTG -0.743833728039  
CAAGCGAA -0.634542242197  
CAAGCGAC -1.42836520006  
CAAGCGAG -0.566687057667  
CAAGCGCA -0.185363462157  
CAAGCGCC -1.00323849291  
CAAGCGCG -0.030871257288  
CAAGCGGA 0.341099059267  
CAAGCGGC -0.714019759298  
CAAGCGGG -1.06466787233  
CAAGCGTA -0.748502264687  
CAAGCGTC -1.02098212103  
CAAGCGTG -0.465072349237  
CAAGCTAA -0.360281070296  
CAAGCTAC -0.316517165891  
CAAGCTAG -0.136912724392  
CAAGCTCA -0.0975073580642  
CAAGCTCC -0.649997997224  
CAAGCTCG -0.133297294186  
CAAGCTGA -0.475517419109  
CAAGCTGC -0.579473845239  
CAAGCTGG -0.750524051315  
CAAGCTTA -0.529264270729  
CAAGCTTC 0.159839549516  
CAAGCTTG -0.0408270208166  
CAAGGAAA 0.792493048316  
CAAGGAAC -1.5057660404

CAAGGAAG -0.132094938854  
CAAGGACA -0.557413500098  
CAAGGACC -0.871692194019  
CAAGGACG -1.30627072099  
CAAGGAGA 0.764003238729  
CAAGGAGC -0.948492118073  
CAAGGAGG -1.11689191479  
CAAGGATA 2.88364799942  
CAAGGATC 2.15540855866  
CAAGGATG 1.09197806679  
CAAGGCAA -0.763472634094  
CAAGGCAC -1.0541598095  
CAAGGCAG -0.711497949681  
CAAGGCCA -1.16558390776  
CAAGGCCC -1.29597124067  
CAAGGCCG -1.35714028402  
CAAGGCCA -0.750389962558  
CAAGGCCG -0.524094404184  
CAAGGCCG -1.45037823513  
CAAGGCTA -0.633372559564  
CAAGGCTC -1.36767579193  
CAAGGCTG -0.720047218853  
CAAGGGAA -0.0805295780165  
CAAGGGAC -1.22450820599  
CAAGGGAG -1.30084809844  
CAAGGGCA -0.669348337999  
CAAGGGCC -1.11224873215  
CAAGGGCG -0.536653528387  
CAAGGGGA -0.066640805645  
CAAGGGGC -1.1330991419  
CAAGGGGG -1.16484079989  
CAAGGGTA 0.149329134245  
CAAGGGTC -0.40034511824  
CAAGGGTG -0.825905196078  
CAAGGTAA 1.67484961136  
CAAGGTAC 0.201368902675  
CAAGGTAG -0.0876496126333  
CAAGGTCA 0.116485752831  
CAAGGTCC -0.832493057769  
CAAGGTCC 0.0298691202571  
CAAGGTGA -0.461827819512  
CAAGGTGC -0.513174665337  
CAAGGTGG -0.791561222934  
CAAGGTTA -0.149644883211  
CAAGGTTC -0.321501451504  
CAAGTAAA 0.867933788081  
CAAGTAAC 0.18228752356  
CAAGTAAG 0.0858021675279  
CAAGTACA -0.462717301076  
CAAGTACC -0.474112754424  
CAAGTACG 0.311129045715  
CAAGTAGA 1.28972918682  
CAAGTAGC -0.339294219362  
CAAGTAGG 0.672968211692

CAAGTATA 2.64777358978  
CAAGTATC 1.31778823954  
CAAGTATG 1.44277046246  
CAAGTCAA 0.110344592284  
CAAGTCAC 0.102209351556  
CAAGTCAG -0.583161939528  
CAAGTCCA -0.181140058363  
CAAGTCCC -0.0226236224752  
CAAGTCCG -0.922285999472  
CAAGTCGA 0.326788678385  
CAAGTCGC -1.29541371373  
CAAGTCGG -0.0701840945314  
CAAGTCTA -0.127273755355  
CAAGTCTC -0.798039304356  
CAAGTCTG -0.913390138307  
CAAGTGAA 0.291337492809  
CAAGTGAC 0.341774469306  
CAAGTGAG -0.481163261536  
CAAGTGCA 0.189507667327  
CAAGTGCC -0.647205919038  
CAAGTGCG 1.59258132299  
CAAGTGGA -0.400516323184  
CAAGTGGC -0.639102305483  
CAAGTGGG -0.74265646534  
CAAGTGTA -0.237974349369  
CAAGTGTC -0.808770587073  
CAAGTGTG 0.561211636039  
CAAGTTAA 0.0325216206716  
CAAGTTAC 0.50324869931  
CAAGTTAG -0.253392726828  
CAAGTTCA 1.76111703813  
CAAGTTCC -0.91112761923  
CAAGTTCG -0.251541099617  
CAAGTTGA 0.318124924075  
CAAGTTGC 0.122046907622  
CAAGTTGG -0.501231878932  
CAAGTTTA -0.0144222522046  
CAAGTTTC -0.199799044823  
CAATAAAA 1.79768850522  
CAATAAAC 1.08807093472  
CAATAAAG 0.297052339978  
CAATAACA -0.177253314062  
CAATAACC -0.0171641451242  
CAATAACG 1.42905472471  
CAATAAGA 0.315298343519  
CAATAAGC -0.0724685696617  
CAATAAGG -0.589672170886  
CAATAATA 2.52678423209  
CAATAATC 2.43684465531  
CAATAATG 0.572110464358  
CAATACAA 1.17279621008  
CAATACAC 1.08345206058  
CAATACAG 0.00497095515209  
CAATACCA 0.760156747194

CAATACCC 0.461576893182  
CAATACCG -0.167904739976  
CAATACGA 2.25815975426  
CAATACGC 1.10856220615  
CAATACGG 0.937214547824  
CAATACTA 1.38773918169  
CAATACTC 0.788398767029  
CAATACTG -0.28100612393  
CAATAGAA 0.410198681566  
CAATAGAC -0.509455728019  
CAATAGAG 1.27769805344  
CAATAGCA 0.615655853751  
CAATAGCC 0.503394550239  
CAATAGCG 0.250963446295  
CAATAGGA 0.914763959964  
CAATAGGC -0.841830392447  
CAATAGGG 0.987745360313  
CAATAGTA 0.741938972865  
CAATAGTC -0.318041281965  
CAATAGTG 0.133284747869  
CAATATAA 2.16778445436  
CAATATAC 3.20926124478  
CAATATAG 1.14785308734  
CAATATCA 3.22867693095  
CAATATCC 4.86128701537  
CAATATCG 5.16247885565  
CAATATGA 2.39720064759  
CAATATGC 1.627336188  
CAATATGG 1.90181404524  
CAATATTA 3.03821914153  
CAATATTC 4.05654667109  
CAATATTG 1.12973908151  
CAATCAAA 2.40328221313  
CAATCAAC 1.47364720876  
CAATCAAG 2.12177449792  
CAATCACA 4.14630929253  
CAATCACC 1.4738753949  
CAATCACG 1.40036234439  
CAATCAGA 2.12341858815  
CAATCAGC 1.81664625084  
CAATCAGG 2.26254704431  
CAATCATA 3.55261236786  
CAATCATC 1.08948396362  
CAATCATG 2.00251966848  
CAATCCAA 3.68098732387  
CAATCCAC 4.5084723103  
CAATCCAG 2.25944731999  
CAATCCCA 2.72800937488  
CAATCCCC 2.03944975112  
CAATCCCG 3.80645780761  
CAATCCGA 4.01355305824  
CAATCCGC 5.57203558402  
CAATCCGG 4.59353346101  
CAATCCTA 2.63621372741

CAATCCTC 0.711036872549  
CAATCCTG 5.05811493561  
CAATCGAA 3.35777617536  
CAATCGAC 0.947738293556  
CAATCGAG 0.606204033935  
CAATCGCA 2.25231212524  
CAATCGCC 1.49154322235  
CAATCGCG 4.2332327871  
CAATCGGA 1.80953745563  
CAATCGGC 2.42827787357  
CAATCGGG 0.940366287083  
CAATCGTA 3.15055258636  
CAATCGTC 0.920357526073  
CAATCGTG 1.14482837954  
CAATCTAA 2.79576209783  
CAATCTAC 4.17122392468  
CAATCTAG 4.60191727563  
CAATCTCA 2.70737329805  
CAATCTCC 3.54823318064  
CAATCTCG 7.86378600967  
CAATCTGA 4.59828929911  
CAATCTGC 4.57985876017  
CAATCTGG 5.85395863458  
CAATCTTA 3.75858890527  
CAATCTTC 3.45224444963  
CAATGAAA 0.677193706539  
CAATGAAC 0.170492940519  
CAATGAAG -0.250160482039  
CAATGACA -0.355023640917  
CAATGACC -0.527062914945  
CAATGACG -0.35712148959  
CAATGAGA 0.640817752884  
CAATGAGC -0.989651877659  
CAATGAGG -0.806110767974  
CAATGATA 1.6498557806  
CAATGATC 1.62523206616  
CAATGATG 0.92853040575  
CAATGCAA 0.682851572519  
CAATGCAC 0.960753790023  
CAATGCAG -0.49544096972  
CAATGCCA -0.0792127375466  
CAATGCCC -1.18487909702  
CAATGCCG -0.195888253415  
CAATGCGA -0.589469077388  
CAATGCGC 0.717085765394  
CAATGCGG -0.434783711521  
CAATGCTA -0.206038746231  
CAATGCTC -0.90387088204  
CAATGCTG -0.119884497696  
CAATGGAA 0.438268450931  
CAATGGAC -0.81118078675  
CAATGGAG -0.636239392886  
CAATGGCA -0.424805469176  
CAATGGCC -1.48614830625

CAATGGCG -0.217856330853  
CAATGGGA 0.319446208032  
CAATGGGC -1.19873023044  
CAATGGGG 0.0544321941588  
CAATGGTA 0.74770740326  
CAATGGTC -0.365055205108  
CAATGGTG -0.289226836439  
CAATGTAA 1.07816404955  
CAATGTAC 0.0661342481161  
CAATGTAG 0.444938386443  
CAATGTCA -0.225121693636  
CAATGTCC -0.29473388524  
CAATGTCCG 1.07025647219  
CAATGTGA 1.05393502133  
CAATGTGC -0.0162401611899  
CAATGTGG -0.370407777387  
CAATGTTA 1.14220881321  
CAATGTTC -0.337183562991  
CAATTAAC 0.588110154482  
CAATTAAG -0.390838146908  
CAATTACA 1.13322904855  
CAATTACC 0.0732568965488  
CAATTACG 3.76124794023  
CAATTAGA 0.622362905449  
CAATTAGC 0.748450511131  
CAATTAGG -0.148448016892  
CAATTATA 2.80908680872  
CAATTATC 1.87853226391  
CAATTATG 0.600107831021  
CAATTCAA 0.267425259076  
CAATTCAC -0.000327772518704  
CAATTCAG -0.00245594145594  
CAATTCOA 1.39276241316  
CAATTCOC 2.61674707182  
CAATTCOG 2.08505247504  
CAATTCOA 0.0103156859834  
CAATTCOC 2.22544941607  
CAATTCOG 0.440980023586  
CAATTCOA 0.405316857537  
CAATTCOC 2.51753524439  
CAATTCOG 0.33535310769  
CAATTGAA 1.52749443092  
CAATTGAC 0.147249843666  
CAATTGAG 0.035044214434  
CAATTGCA 0.386093025453  
CAATTGCC 0.304600517645  
CAATTGCG 1.38761476405  
CAATTGGA 0.200053630495  
CAATTGGC 0.276631641575  
CAATTGGG -0.0111479249783  
CAATTGTA 0.512659743597  
CAATTGTC -0.306735482504  
CAATTGTG -0.304573333959



CAATTTAA 0.419401143341  
CAATTTAC 2.48736396701  
CAATTTAG 2.28974432191  
CAATTTCA 1.99581392369  
CAATTTCC 2.15695358526  
CAATTTCCG 0.743232288991  
CAATTTGA 0.771167185454  
CAATTTGC 1.28699905607  
CAATTTGG 1.83102040883  
CAATTTTA 2.2569009405  
CAATTTTC 0.951288378364  
CACAAAAA 1.69892442445  
CACAAAAC 0.218991249734  
CACAAAAG 0.234253843762  
CACAAACA 0.827602608148  
CACAAACC 0.677463190962  
CACAAACG -0.52513182773  
CACAAAGA 1.04605933252  
CACAAAGC 0.846679282395  
CACAAAGG -0.555207439446  
CACAAATA 0.295461832979  
CACAAATC 4.3903644233  
CACAAATG 1.16079409006  
CACAAACAA 1.49440927153  
CACAAACAC 2.00712495079  
CACAAACAG 0.167087922495  
CACAAACCA -0.591180342683  
CACAAACCC 0.0590792975161  
CACAAACCG -0.449735522835  
CACAAACGA 2.09985373055  
CACAAACGC -0.233721670837  
CACAAACGG -1.05175771265  
CACAAACTA 0.231187314903  
CACAAACTC -0.514768047533  
CACAAACTG -0.703274884738  
CACAAAGAA -0.276560023019  
CACAAAGAC -0.381889486661  
CACAAAGAG 0.411055229049  
CACAAAGCA -0.253423569856  
CACAAAGCC -0.9373384427  
CACAAAGCG 0.144361838435  
CACAAAGGA -0.773451660584  
CACAAAGGC -1.13609509773  
CACAAAGGG -0.90162744382  
CACAAAGTA 0.134745870979  
CACAAAGTC 0.0945310058549  
CACAAAGTG -1.1766458382  
CACAAATAA 1.05948990296  
CACAAATAC 0.835121511077  
CACAAATAG 0.545292712828  
CACAAATCA 2.67852879364  
CACAAATCC 5.30644313268  
CACAAATCG 2.32901925883  
CACAAATGA 0.603969221308

CACAATGC 0.141492129916  
CACAATGG -0.142029530473  
CACAATTA 1.23618333765  
CACAATTC 1.75872069168  
CACACAAA 1.40651213053  
CACACAAC 0.276489972752  
CACACAAG -0.307554129656  
CACACACA 0.101820154363  
CACACACC -0.26457724523  
CACACACG -0.348366774485  
CACACAGA 1.29775987491  
CACACAGC 0.274784719233  
CACACAGG -0.490287831597  
CACACATA 0.89931839882  
CACACATC -0.218063867839  
CACACATG -1.00091768574  
CACACCAA 1.06729580288  
CACACCAC -0.325007362823  
CACACCAG 1.12051361815  
CACACCCA -0.629831623112  
CACACCCC -0.971832448879  
CACACCCG -0.72315452324  
CACACCGA 1.35862440871  
CACACCGC 0.293621445177  
CACACCGG -1.00666206902  
CACACCTA 1.2701509213  
CACACCTC -0.758805404354  
CACACCTG -0.257441527717  
CACACGAA 0.448071044845  
CACACGAC -0.543431153116  
CACACGAG -0.46800505072  
CACACGCA -0.219706389774  
CACACGCC -0.352935201982  
CACACGCG -0.855490978687  
CACACGGA -0.86721864804  
CACACGGC -0.929936115961  
CACACGGG -0.745389209904  
CACACGTA 0.252285514397  
CACACGTC -0.523005227082  
CACACGTG -0.888849543222  
CACACTAA 1.68386962879  
CACACTAC 0.229540088099  
CACACTAG -0.0256360453445  
CACACTCA 0.314784990068  
CACACTCC -0.763058867031  
CACACTCG 0.071341492229  
CACACTGA -0.0446128718221  
CACACTGC -0.267942533251  
CACACTGG -0.996711794509  
CACACTTA 0.18067061702  
CACACTTC 1.58793265134  
CACAGAAA -0.213180214139  
CACAGAAC -0.456914368311  
CACAGAAG -0.13993481838

CACAGACA 0.289726336665  
CACAGACC -0.925454467153  
CACAGACG 0.592323364393  
CACAGAGA 0.81830448071  
CACAGAGC -1.21701491846  
CACAGAGG -0.144626095227  
CACAGATA 1.88883200561  
CACAGATC 1.27506463388  
CACAGATG 1.41075435379  
CACAGCAA 0.398379005891  
CACAGCAC -0.158781999587  
CACAGCAG 0.125189759907  
CACAGCCA -0.126704989007  
CACAGCCC -1.28374851457  
CACAGCCG -0.960324601446  
CACAGCGA 1.25260176108  
CACAGCGC -0.688048361369  
CACAGCGG 1.13987702801  
CACAGCTA -1.01006551876  
CACAGCTC -1.23822943276  
CACAGCTG 0.127442085101  
CACAGGAA 0.128727298398  
CACAGGAC -0.720476930193  
CACAGGAG 0.00322178952596  
CACAGGCA -0.979897377957  
CACAGGCC -1.33056143527  
CACAGGCG -0.387147438803  
CACAGGGA -0.253622742631  
CACAGGGC -1.31523088203  
CACAGGGG -0.962215435896  
CACAGGTA 0.234346111465  
CACAGGTC -0.310632682068  
CACAGGTG -0.70518087932  
CACAGTAA 0.40390043068  
CACAGTAC -0.307047572127  
CACAGTAG -0.589768359313  
CACAGTCA 0.0346869057952  
CACAGTCC -1.45922469518  
CACAGTCG -0.574936522151  
CACAGTGA 0.0486425918547  
CACAGTGC -0.814831503472  
CACAGTGG -0.649107208752  
CACAGTTA 0.807874309588  
CACAGTTC -0.0986976898427  
CACATAAA -0.112465181155  
CACATAAC 0.0116534369808  
CACATAAG 0.364031896168  
CACATACA 0.608978860936  
CACATACC 0.547621622829  
CACATACG 0.122335995665  
CACATAGA -0.0165480687075  
CACATAGC -0.825097004189  
CACATAGG -0.828596903731  
CACATATA -0.0667955435485

CACATATC 2.64171371891  
CACATATG 1.58360181971  
CACATCAA 0.838875473528  
CACATCAC 0.382303515106  
CACATCAG -0.158970717098  
CACATCCA 0.730423022603  
CACATCCC 0.693171963372  
CACATCCG 0.839189654204  
CACATCGA 0.0213872875363  
CACATCGC -0.215414765385  
CACATCGG 0.0720200388467  
CACATCTA 0.53608816  
CACATCTC 0.0223311364717  
CACATCTG 0.352669899665  
CACATGAA 1.48140396894  
CACATGAC -0.651805973708  
CACATGAG 0.173424596475  
CACATGCA 0.211940219858  
CACATGCC -1.05224335965  
CACATGCG -0.963608077028  
CACATGGA 0.153305009669  
CACATGGC -0.205741816741  
CACATGGG 0.81172838119  
CACATGTA -0.397435418338  
CACATGTC -0.603224806528  
CACATGTG -0.578583840912  
CACATTAA 0.164811027431  
CACATTAC 1.97749969956  
CACATTAG 0.51368854155  
CACATTCA 0.56084936115  
CACATTCC 1.02416052121  
CACATTCCG 0.429103889487  
CACATTGA 0.99815671196  
CACATTGC 0.4161440673  
CACATTGG -0.040750174628  
CACATTTA 0.338309333516  
CACATTTTC 1.16189032446  
CACCAAAA 2.21888481734  
CACCAAAC 0.213162962954  
CACCAAAG 0.863164358138  
CACCAACA 0.918674228608  
CACCAACC -0.699416108267  
CACCAACG -0.264478181606  
CACCAAGA 0.155402858342  
CACCAAGC 0.132097029907  
CACCAAGG -0.651693841005  
CACCAATA 1.24001100971  
CACCAATC 0.962130486878  
CACCAATG -0.488800047564  
CACCACAA 1.15646482672  
CACCACAC -0.377912304329  
CACCAACAG -0.525442871826  
CACCAACCA -1.08929158677  
CACCAACC -0.366524169666

CACCACCG 0.587956984868  
CACCACGA -0.458847023816  
CACCACGC -0.727352834401  
CACCACGG -0.888723557294  
CACCACTA -0.295255080138  
CACCACTC 0.385561898055  
CACCACTG -1.06183371171  
CACCAGAA -0.483374549821  
CACCAGAC -0.429874965189  
CACCAGAG -0.384412341805  
CACCAGCA -0.146717147978  
CACCAGCC -0.700252790749  
CACCAGCG -0.93306642193  
CACCAGGA 0.682943056077  
CACCAGGC -0.18346818422  
CACCAGGG -1.20915334426  
CACCAGTA -0.654735277231  
CACCAGTC -1.0332419633  
CACCAGTG -1.15808460845  
CACCATAA 1.18242995149  
CACCATAC 0.516823291006  
CACCATAG -0.0320302232752  
CACCATCA -0.792111953952  
CACCATCC 0.279040272963  
CACCATCG -0.814099635009  
CACCATGA 0.46910050098  
CACCATGC 0.272513574564  
CACCATGG -0.175760302398  
CACCATTA 0.952139959597  
CACCATTC -0.506965545575  
CACCCAAA -0.849681511382  
CACCCAAC 0.203064746456  
CACCCAAG -0.936700410229  
CACCCACA -0.148445925839  
CACCCACC -0.234316052582  
CACCCACG -0.346533705367  
CACCCAGA -0.755008575321  
CACCCAGC -0.824552023566  
CACCCAGG -1.79077757587  
CACCCATA 0.891915549318  
CACCCATC -0.769705016818  
CACCCATG -0.439329660202  
CACCCCAA -0.0394717572525  
CACCCCAC -0.582237955594  
CACCCCAG -0.958426709693  
CACCCCCA -0.355622204767  
CACCCCCC -1.2583728053  
CACCCCCG -0.426928149099  
CACCCCGA 0.568604291658  
CACCCCGC -0.86647736984  
CACCCCGG -1.02479724677  
CACCCCTA -0.937100062686  
CACCCCTC -0.659523526649  
CACCCCTG -0.991622172113

CACCCGAA -0.844918615978  
CACCCGAC -1.10730496069  
CACCCGAG -0.934649348862  
CACCCGCA -0.384874987226  
CACCCGCC -0.605022850512  
CACCCGCG -0.720528160985  
CACCCGGA -0.23842863058  
CACCCGGC -0.276686270329  
CACCCGGG -1.1681836091  
CACCCGTA -0.590186569863  
CACCCGTC -0.716721922215  
CACCCGTG -0.328439041769  
CACCCCTAA -0.203592737276  
CACCCCTAC -0.567420233038  
CACCCCTAG -1.19328512908  
CACCCCTCA -0.375364879315  
CACCCCTCC -0.547954100216  
CACCCCTCG 0.574386575277  
CACCCCTGA -0.141795332565  
CACCCCTGC -0.527328740026  
CACCCCTGG -1.12161769401  
CACCCCTTA -0.59163253284  
CACCCCTTC -0.510581759926  
CACCGAAA 1.43422563678  
CACCGAAC -1.18178355481  
CACCGAAG 0.248290296734  
CACCGACA -0.761809724394  
CACCGACC 0.0970813060663  
CACCGACG -1.3455229177  
CACCGAGA 1.54656561615  
CACCGAGC -1.1760692304  
CACCGAGG -1.53534136775  
CACCGATA 1.62767180196  
CACCGATC 0.705942545285  
CACCGATG 0.657474033571  
CACCGCAA 1.24215904365  
CACCGCAC 0.0523881900948  
CACCGCAG -0.131143248471  
CACCGCCA -1.62784196138  
CACCGCCC -0.182464478899  
CACCGCCG -0.512311060551  
CACCGCGA -0.0525144374046  
CACCGCGC 0.388056262605  
CACCGCGG -0.043845194081  
CACCGCTA -0.945764862523  
CACCGCTC -0.597232894871  
CACCGCTG -0.395595291917  
CACCGGAA -0.0939614553619  
CACCGGAC -1.52517440789  
CACCGGAG -1.00112809792  
CACCGGCA -0.648545761088  
CACCGGCC -1.44183628465  
CACCGGCG -1.3135925422  
CACCGGGA -1.06652185198

CACCGGGC -1.4792575033  
CACCGGGG 0.642525620218  
CACCGGTA -0.582892455105  
CACCGGTC -0.400533835751  
CACCGGTG -1.06283715565  
CACCGTAA 1.22846944405  
CACCGTAC 0.217842216247  
CACCGTAG -1.18946503709  
CACCGTCA -0.522952950763  
CACCGTCC -0.203910577294  
CACCGTCG -0.596176913231  
CACCGTGA -0.245631523162  
CACCGTGC -0.430799733268  
CACCGTGG -0.490371212325  
CACCGTTA 0.57436409646  
CACCGTTC -0.89394439325  
CACCTAAA -0.0208822982969  
CACCTAAC 0.270026528699  
CACCTAAG 0.026371311768  
CACCTACA -0.879666685067  
CACCTACC -0.865219340229  
CACCTACG -0.5573481547  
CACCTAGA 1.10684283803  
CACCTAGC -0.0921328297312  
CACCTAGG 0.86134278981  
CACCTATA -0.135551449051  
CACCTATC -0.677613485378  
CACCTATG -0.251128639462  
CACCTCAA 0.525737448883  
CACCTCAC -0.693022191718  
CACCTCAG -0.429972460523  
CACCTCCA -0.438803499053  
CACCTCCC -1.31622831419  
CACCTCCG -0.409122312162  
CACCTCGA -0.387488803165  
CACCTCGC -0.653544945452  
CACCTCGG -1.15249783827  
CACCTCTA -0.903076543376  
CACCTCTC -0.91241649187  
CACCTCTG -0.359965321331  
CACCTGAA 0.488094055879  
CACCTGAC -0.811433542752  
CACCTGAG -0.30101148698  
CACCTGCA -0.211077137835  
CACCTGCC -0.375364879315  
CACCTGCG -0.625234705021  
CACCTGGA -0.924277727218  
CACCTGGC -0.658207993087  
CACCTGGG -1.02422351417  
CACCTGTA 0.920315705018  
CACCTGTC 0.0254617038214  
CACCTTAA 0.503587188474  
CACCTTAC 0.433804576071  
CACCTTAG 0.358122581094

CACCTTCA 0.31255488231  
CACCTTCC -0.180607624056  
CACCTTCG -1.04309918597  
CACCTTGA -0.25002299532  
CACCTTGC -0.347283086397  
CACCTTGG -0.999474336574  
CACCTTTA 0.785432608702  
CACCTTTC -0.45837549142  
CACGAAAA 1.05928968466  
CACGAAAC -0.486333128082  
CACGAAAG 0.482443508583  
CACGAACA -0.0346388115819  
CACGAACC -0.219324772647  
CACGAACG -0.636478295663  
CACGAAGA 0.358519358354  
CACGAAGC -0.677982033426  
CACGAAGG -0.86713160797  
CACGAATA 1.03928223056  
CACGAATC 4.37592831787  
CACGAATG 0.422671549843  
CACGACAA 0.535505801809  
CACGACAC -0.417760973839  
CACGACAG 0.213545102844  
CACGACCA -0.686328470481  
CACGACCC -1.06604953544  
CACGACCG -0.533008562061  
CACGACGA -0.525037730356  
CACGACGC -0.247634228934  
CACGACGG -0.485455670071  
CACGACTA -0.324037375728  
CACGACTC -0.373277485906  
CACGACTG 0.259755277586  
CACGAGAA -0.00715924185591  
CACGAGAC -0.907478209417  
CACGAGAG -0.317496562723  
CACGAGCA -0.0375694220123  
CACGAGCC -1.20538291477  
CACGAGCG -0.460030559673  
CACGAGGA -0.358120490041  
CACGAGGC -1.25449259553  
CACGAGGG 0.278243843246  
CACGAGTA 1.204118612  
CACGAGTC -0.653958189752  
CACGAGTG 1.03834622307  
CACGATAA 0.897445338318  
CACGATAC 0.794765761274  
CACGATAG -0.180274362524  
CACGATCA 1.32147424278  
CACGATCC 1.73957187611  
CACGATCG 1.78594410744  
CACGATGA 0.134212652527  
CACGATGC 0.285095177585  
CACGATGG 0.457143599968  
CACGATTA 1.19326186612



CACGATTC 5.43865046562  
CACGCAAA 0.278091196396  
CACGCAAC 0.254205884967  
CACGCAAG -0.2627585521  
CACGCACA -0.317314118371  
CACGCACC -0.877863152069  
CACGCACG 0.0829395163119  
CACGCAGA 0.603925047818  
CACGCAGC -0.844977165455  
CACGCAGG -0.565376751737  
CACGCATA 0.262357069971  
CACGCATC 0.25938202467  
CACGCATG -0.973509473185  
CACGCCAA 0.212619812002  
CACGCCAC -1.0108530615  
CACGCCAG -0.664383656005  
CACGCCCA -1.10782511006  
CACGCCCC -1.82370904289  
CACGCCCG -1.07610932884  
CACGCCGA -0.725643398777  
CACGCCGC -1.00332840818  
CACGCCGG -0.654175136475  
CACGCCTA -1.00227059687  
CACGCCTC -1.568079151  
CACGCCTG -0.458981373955  
CACGCGAA 0.167969562611  
CACGCGAC -0.284227652075  
CACGCGAG 0.390346226749  
CACGCGCA 1.24285144349  
CACGCGCC -0.972468651678  
CACGCGCG 0.0949944354208  
CACGCGGA -0.374574984138  
CACGCGGC -0.889086354946  
CACGCGGG -0.131019092213  
CACGCGTA 0.714155154964  
CACGCGTC 0.00247580645707  
CACGCGTG 1.6928684743  
CACGCTAA -0.195700842812  
CACGCTAC 1.33596706801  
CACGCTAG -0.193337430441  
CACGCTCA -0.168999406091  
CACGCTCC -0.302019635787  
CACGCTCG -0.374527412688  
CACGCTGA -0.806619416556  
CACGCTGC -0.454993736359  
CACGCTGG -1.35947180784  
CACGCTTA 0.0492312232041  
CACGCTTC -0.874177148832  
CACGAAA 0.602943559933  
CACGGAAC -0.104084241729  
CACGGAAG -0.784478043121  
CACGGACA -0.617911838287  
CACGGACC -0.54559643824  
CACGGACG -0.868028408218

CACGGAGA 0.0709444535879  
CACGGAGC 0.216343454188  
CACGGAGG -1.45307386351  
CACGGATA 1.78740418502  
CACGGATC 1.42130371492  
CACGGATG -0.0822790050242  
CACGGCAA 0.18396193405  
CACGGCAC -1.01371048508  
CACGGCAG -0.578537053606  
CACGGCCA -0.675664885596  
CACGGCCC -1.35781726235  
CACGGCCG -0.448198599063  
CACGGCGA 0.299945834222  
CACGGCGC -1.25708158022  
CACGGCGG -1.02473608348  
CACGGCTA 0.0107469656133  
CACGGCTC -0.974958049978  
CACGGCTG -0.817010380438  
CACGGGAA -0.171784688356  
CACGGGAC -1.61764572678  
CACGGGAG -0.935000122961  
CACGGGCA -0.890079605003  
CACGGGCC -1.78155760153  
CACGGGCG -0.252683598564  
CACGGGGA -0.0836300864829  
CACGGGGC -0.706619523613  
CACGGGGG -1.31627902222  
CACGGGTA -0.209578375775  
CACGGGTC -0.992011107925  
CACGGTAA 0.536014711772  
CACGGTAC 0.732235965338  
CACGGTAG -0.788140783396  
CACGGTCA -0.0737545671035  
CACGGTCC -0.550087758167  
CACGGTCG 0.0169257651106  
CACGGTGA 0.194084981799  
CACGGTGC -1.51905258958  
CACGGTGG 0.00114772657865  
CACGGTTA -0.256944641307  
CACGGTTC -0.471411898414  
CACGTAAA -0.0136216403826  
CACGTAAAC -0.0529425804554  
CACGTAAAG 1.08056405535  
CACGTACA 0.0210150801466  
CACGTACC -0.795017210368  
CACGTACG -0.33084009309  
CACGTAGA 0.310143898488  
CACGTAGC -0.417758098642  
CACGTAGG -0.766494728082  
CACGTATA 0.134864538222  
CACGTATC 2.4966869257  
CACGTATG -0.244257440123  
CACGTCAA 0.151012693091  
CACGTCAC -0.392110029744

CACGTCAG -0.291697153883  
CACGTCCA -0.217886912499  
CACGTCCC -0.298378067422  
CACGTCCG -0.421389473125  
CACGTCGA -0.759187282862  
CACGTCGC -0.88402130242  
CACGTCGG -1.06498153025  
CACGTCTA -0.906419091198  
CACGTCTC -0.50621198244  
CACGTCTG -0.153965259575  
CACGTGAA -0.209666722754  
CACGTGAC -0.890361897124  
CACGTGAG -0.275511360064  
CACGTGCA -0.107854148457  
CACGTGCC -0.277770742561  
CACGTGCG -0.0743369252947  
CACGTGGA -0.421370130888  
CACGTGGC -0.381253283861  
CACGTGGG -0.901787932118  
CACGTGTA 0.336149537406  
CACGTGTC 0.176158386566  
CACGTTAA 0.509154616423  
CACGTTAC 0.251160528017  
CACGTTAG 0.635700946803  
CACGTTCA -0.974955436162  
CACGTTCC -0.301799029722  
CACGTTCCG -0.553565440273  
CACGTTGA -0.220831898918  
CACGTTGC 0.0334704358574  
CACGTTGG -0.898679059441  
CACGTTTA 0.742923858711  
CACGTTTC 0.508465614542  
CACTAAAA 1.97683814274  
CACTAAAC 0.144956742943  
CACTAAAG 0.0233737876496  
CACTAACA 0.0594572553008  
CACTAACC -0.339267035676  
CACTAACG -0.204533972395  
CACTAAGA 0.0317215316128  
CACTAAGC -0.302960086762  
CACTAAGG -0.833445532297  
CACTAATA 1.65282141616  
CACTAATC 0.919718186694  
CACTAATG 0.75240573741  
CACTACAA 0.752765398483  
CACTACAC 0.105398468383  
CACTACAG -0.502379082747  
CACTACCA 0.353610612021  
CACTACCC 0.111655420977  
CACTACCG -0.943615783058  
CACTACGA 0.507968728132  
CACTACGC -0.504616247809  
CACTACGG 1.03697606075  
CACTACTA 1.27344955701

CACTACTC -0.789548584661  
CACTACTG -0.585786994875  
CACTAGAA 0.139150673599  
CACTAGAC -0.171784688356  
CACTAGAG -0.579535531295  
CACTAGCA -0.503275098851  
CACTAGCC -1.27045778329  
CACTAGCG -0.537475834882  
CACTAGGA -0.163919193433  
CACTAGGC -0.0217981794018  
CACTAGGG -0.302155815598  
CACTAGTA -0.0873749005781  
CACTAGTC -0.512812390448  
CACTAGTG -0.337863677899  
CACTATAA 0.106859852874  
CACTATAC 0.165079989091  
CACTATAG -0.3281162355  
CACTATCA 0.86477838948  
CACTATCC 1.85248794051  
CACTATCG 1.59093252789  
CACTATGA 0.562703340795  
CACTATGC 0.57702234727  
CACTATGG 0.323021646854  
CACTATTA -0.193498441502  
CACTATTC 0.670828803347  
CACTCAA 1.18900709653  
CACTCAAC -0.143553385166  
CACTCAAG 0.67268252161  
CACTCACA 0.138202903939  
CACTCAC 0.71778365425  
CACTCACG -0.362789810834  
CACTCAGA 0.234157916717  
CACTCAGC 0.911492507935  
CACTCAGG -0.610534342801  
CACTCATA 0.9245634173  
CACTCATC 0.836813695516  
CACTCATG -0.983694991134  
CACTCCAA -0.0426365655909  
CACTCCAC 0.181283034095  
CACTCCAG -0.584555364805  
CACTCCCA 0.093276635586  
CACTCCCC -0.649871227151  
CACTCCCG -0.673775358054  
CACTCCGA -0.590463634353  
CACTCCGC 0.226038881649  
CACTCCGG 0.0182297978824  
CACTCCTA -0.558228749289  
CACTCCTC -0.40320175768  
CACTCCTG -0.824117345976  
CACTCGAA 0.817723429426  
CACTCGAC -0.434104380759  
CACTCGAG -0.0286510820297  
CACTCGCA -0.387258787362  
CACTCGCC -1.27965135809

CACTCGCG 0.0762520682329  
CACTCGGA 1.18791608976  
CACTCGGC -0.798548475701  
CACTCGGG -1.57275605185  
CACTCGTA 0.436621485508  
CACTCGTC -0.51674356962  
CACTCTAA 0.572641068993  
CACTCTAC -0.0842919046785  
CACTCTAG -0.0865769025721  
CACTCTCA 0.466277841148  
CACTCTCC 0.663496788257  
CACTCTCG -0.140576771575  
CACTCTGA -0.050250088657  
CACTCTGC -0.38124805623  
CACTCTGG -0.116195357881  
CACTCTTA 0.867593469246  
CACTCTTC -1.54218015577  
CACTGAAA 0.464810183498  
CACTGAAC 0.00611946587552  
CACTGAAG -1.02790690359  
CACTGACA -0.20289641671  
CACTGACC -0.105206614293  
CACTGACG 0.374431224262  
CACTGAGA 0.41062734738  
CACTGAGC -0.957549251682  
CACTGAGG -0.825387660522  
CACTGATA 0.396489739731  
CACTGATC 1.30206875049  
CACTGATG -0.221025321297  
CACTGCAA 0.738439073323  
CACTGCAC 0.0833122464647  
CACTGCAG -0.313856039884  
CACTGCCA -0.561329519137  
CACTGCCC -0.530765646604  
CACTGCCG -0.889836520121  
CACTGCGA 0.132067755168  
CACTGCGC 0.109540321119  
CACTGCGG -0.781723865267  
CACTGCTA -0.157691515578  
CACTGCTC -0.372429041253  
CACTGCTG -0.83839688383  
CACTGGAA -0.346250629101  
CACTGGAC -0.638500082291  
CACTGGAG -0.813931828026  
CACTGGCA -1.19798450876  
CACTGGCC -0.756681417522  
CACTGGCG -0.812829320463  
CACTGGGA -0.162058679248  
CACTGGGC -1.34184475591  
CACTGGGG -0.727570303887  
CACTGGTA -0.463731200279  
CACTGGTC -0.996711794509  
CACTGTAA 0.772298706374  
CACTGTAC -0.557519621025

CACTGTAG -0.0180849924794  
CACTGTCA -0.682857845678  
CACTGTCC -0.408817541224  
CACTGTCCG 0.156741654866  
CACTGTGA -0.0217981794018  
CACTGTGC -0.741559446791  
CACTGTGG 1.34334613179  
CACTGTTA 0.467362836144  
CACTGTTC 0.0278243320483  
CACTTAAA 0.81441799779  
CACTTAAC -0.623920478367  
CACTTAAG -0.523206490909  
CACTTACA -0.00705834856068  
CACTTACC -0.33482015062  
CACTTACG 0.316916295585  
CACTTAGA 1.54589125164  
CACTTAGC -0.412749765922  
CACTTAGG 0.0870021704253  
CACTTATA 0.780158973664  
CACTTATC 2.31862254455  
CACTTATG 0.460835876363  
CACTTCAA -0.741079027421  
CACTTCAC -0.0228267159737  
CACTTCAG -0.891234650266  
CACTTCCA -0.28018120362  
CACTTCCC -0.921170945593  
CACTTCCG 0.315921215857  
CACTTCGA 0.0113374266338  
CACTTCGC -1.14950972389  
CACTTCGG -0.39232906752  
CACTTCTA -0.711678041599  
CACTTCTC -0.513912284195  
CACTTCTG -0.662616977812  
CACTTGAA -0.0250625741276  
CACTTGAC 0.128621700235  
CACTTGAG 0.229586091259  
CACTTGCA -0.640226246337  
CACTTGCC -0.503476362678  
CACTTGCG -0.739360443442  
CACTTGGA 1.29576213539  
CACTTGGC -0.524733482181  
CACTTGGG -0.343844611529  
CACTTGTA 0.226779375704  
CACTTGTC -0.180274362524  
CACTTTAA 0.733101138413  
CACTTTAC 1.17745141627  
CACTTTAG -0.863845518572  
CACTTTCA 0.471729738432  
CACTTTCC 0.131659477118  
CACTTTCG -0.027462841304  
CACTTTGA 0.113231813369  
CACTTTGC -0.417044788272  
CACTTTGG -0.177380345517  
CACTTTTA 0.352149488911

CACTTTTC 0.320632357705  
CAGAAAAA 0.169175315904  
CAGAAAAC 1.60158879409  
CAGAAAAG 0.583366601316  
CAGAAACA 0.751809525994  
CAGAAACC -0.259224411569  
CAGAAACG 0.397539970975  
CAGAAAGA -0.207775888304  
CAGAAAGC -0.71954327514  
CAGAAAGG -0.206028552349  
CAGAAATA 2.76105689532  
CAGAAATC 5.59799731083  
CAGAAATG 0.607370318607  
CAGAACAA -0.644191927879  
CAGAACAC 0.682954556867  
CAGAACAG -0.567718730818  
CAGAACCA -0.0112618873532  
CAGAACCC 0.467751771955  
CAGAACCG 0.709671415103  
CAGAACGA -0.557541838461  
CAGAACGC -0.0504338399175  
CAGAACGG 0.325991464524  
CAGAACTA 1.43347364193  
CAGAACTC 0.452527862402  
CAGAACTG -0.0612589586273  
CAGAAGAA 0.316351972724  
CAGAAGAC -0.194259061941  
CAGAAGAG -0.95562208519  
CAGAAGCA -0.177008922272  
CAGAAGCC -0.354082144416  
CAGAAGCG 0.315576453535  
CAGAAGGA -0.865789674867  
CAGAAGGC -0.766280395175  
CAGAAGGG -1.3984323027  
CAGAAGTA 0.29364340123  
CAGAAGTC -0.764530184023  
CAGAATAA 1.20349312585  
CAGAATAC 1.1209276466  
CAGAATAG 0.138007390507  
CAGAATCA 6.20509396291  
CAGAATCC 10.0211489185  
CAGAATCG 6.05726176105  
CAGAATGA 0.308636249454  
CAGAATGC 0.0510101863319  
CAGAATGG -0.608815758821  
CAGAATTA 1.97106291643  
CAGAATTC 2.77090235582  
CAGACAAA 0.320129459518  
CAGACAAC 0.251750204892  
CAGACAAG -0.641080702767  
CAGACACA -0.188153972053  
CAGACACC -0.548213652139  
CAGACACG 0.874851513344  
CAGACAGA 0.0720433018085

CAGACAGC -0.238979361598  
CAGACAGG -1.48547655556  
CAGACATA 0.527306522591  
CAGACATC 0.486666389614  
CAGACATG -0.158970717098  
CAGACCAA -0.827351159055  
CAGACCAC 0.0274555226194  
CAGACCAG -1.27140137084  
CAGACCCA -0.440168172355  
CAGACCCC -0.909548874403  
CAGACCCG -1.52890772119  
CAGACCGA -0.177830444622  
CAGACCGC 0.0326227753485  
CAGACCGG 0.0254488961233  
CAGACCTA -0.72215081792  
CAGACCTC -1.14595963908  
CAGACCTG -0.440436872633  
CAGACGAA 2.17885579453  
CAGACGAC -0.390189659174  
CAGACGAG -0.994294014766  
CAGACGCA -0.318683235159  
CAGACGCC -0.928161334939  
CAGACGCG -0.732756114709  
CAGACGGA -0.839458877246  
CAGACGGC -0.0590889686351  
CAGACGGG -0.804419106299  
CAGACGTA 0.574070303549  
CAGACGTC 0.418211595707  
CAGACTAA -0.853852116093  
CAGACTAC -0.307644306306  
CAGACTAG 0.655721208603  
CAGACTCA -0.678328886801  
CAGACTCC -1.15846152071  
CAGACTCG -0.535700269714  
CAGACTGA -0.673142291834  
CAGACTGC -0.387780243642  
CAGACTGG -0.881386575954  
CAGACTTA -0.363638778251  
CAGACTTC -0.424555849754  
CAGAGAAA 0.207458571049  
CAGAGAAC 0.583421752832  
CAGAGAAG 0.348620314631  
CAGAGACA 0.0801871681285  
CAGAGACC -0.927968958086  
CAGAGACG -0.798503256685  
CAGAGAGA 0.491889316622  
CAGAGAGC -0.396470920256  
CAGAGAGG -0.824156814596  
CAGAGATA 1.84561334321  
CAGAGATC 4.04513971695  
CAGAGATG -0.551600634832  
CAGAGCAA -0.277138983249  
CAGAGCAC -0.38618921388  
CAGAGCAG -1.00666206902



CAGAGCCA -0.38442959299  
CAGAGCCC -1.48970414146  
CAGAGCCG -1.10961688089  
CAGAGCGA -0.571170013383  
CAGAGCGC -0.932651870722  
CAGAGCGG -0.752251522269  
CAGAGCTA -0.775830233088  
CAGAGCTC -0.539985620946  
CAGAGCTG -1.13348886185  
CAGAGGAA -0.598884042399  
CAGAGGAC -0.557425523652  
CAGAGGAG -1.41251711126  
CAGAGGCA -0.482881845516  
CAGAGGCC -0.977704125003  
CAGAGGCG -1.03159003163  
CAGAGGGA -0.288357742639  
CAGAGGGC -0.880421032346  
CAGAGGGG -0.316734896759  
CAGAGGTA -0.277727353217  
CAGAGGTC -1.3848846333  
CAGAGTAA 0.213096049266  
CAGAGTAC -0.26616147907  
CAGAGTAG 0.0413646827552  
CAGAGTCA -0.766628294077  
CAGAGTCC -0.329300032739  
CAGAGTCG -0.700391322994  
CAGAGTGA -0.388684885338  
CAGAGTGC 0.0288405836853  
CAGAGTGG -0.356022641369  
CAGAGTTA 0.133322909582  
CAGAGTTC -0.587961166973  
CAGATAAA 0.337759648024  
CAGATAAC 1.91807224176  
CAGATAAG 0.37614954686  
CAGATACA 2.14126598476  
CAGATACC 3.71471705027  
CAGATACG 7.68169347678  
CAGATAGA -0.24214155612  
CAGATAGC 2.57911491823  
CAGATAGG 0.115140944531  
CAGATATA 2.18943782836  
CAGATATC 15.8497179906  
CAGATATG 5.93136182735  
CAGATCAA 0.79713806062  
CAGATCAC 2.44888885777  
CAGATCAG 0.597841391221  
CAGATCCA 2.24586593237  
CAGATCCC 2.86001204604  
CAGATCCG 3.93229788492  
CAGATCGA 0.425100568995  
CAGATCGC 8.80074074419  
CAGATCGG 3.32099011399  
CAGATCTA 2.74989015087  
CAGATCTC 7.30202129018

CAGATCTG 4.66681152947  
CAGATGAA 1.72045128976  
CAGATGAC -0.373772019882  
CAGATGAG -0.577312219457  
CAGATGCA -0.214281414794  
CAGATGCC -0.406925661247  
CAGATGCG 0.70482017272  
CAGATGGA 0.354121351655  
CAGATGGC -0.898455316797  
CAGATGGG -1.05457226965  
CAGATGTA 0.866341974175  
CAGATGTC 1.85183134995  
CAGATTAA 1.78012627592  
CAGATTAC 17.5068647494  
CAGATTAG 0.640397974044  
CAGATTCA 4.1599523662  
CAGATTCC 18.2922594577  
CAGATTCG 12.3358706041  
CAGATTGA 0.726692845877  
CAGATTGC 16.8299530736  
CAGATTGG 0.699715912956  
CAGATTTA 4.55740764954  
CAGATTTT 26.9467072763  
CAGCAAAA 0.0292046882455  
CAGCAAAC 1.3677769466  
CAGCAAAG -0.28715747836  
CAGCAACA -0.630334782681  
CAGCAACC -0.839635571203  
CAGCAACG -0.0505606099905  
CAGCAAGA 0.226736770505  
CAGCAAGC -0.704841606011  
CAGCAAGG -0.612986363533  
CAGCAATA 1.46476676911  
CAGCAATC 5.16846344862  
CAGCAATG -0.572902189206  
CAGCACAA 0.71006453302  
CAGCACAC -0.761872978739  
CAGCACAG -0.472151346943  
CAGCACCA 0.00759705602563  
CAGCACCC -0.318659710816  
CAGCACCG -0.141708553876  
CAGCACGA -0.487985059755  
CAGCACGC -0.541275800493  
CAGCACGG 0.0383263831081  
CAGCACTA -0.307139317066  
CAGCACTC -0.826829180012  
CAGCACTG -1.03482227642  
CAGCAGAA -0.452909740911  
CAGCAGAC -0.286884857358  
CAGCAGAG -0.3770450402  
CAGCAGCA 0.50336344583  
CAGCAGCC -1.14357845276  
CAGCAGCG -0.910188997927  
CAGCAGGA -0.805878138356

CAGCAGGC -0.38143834203  
CAGCAGGG -0.609327021219  
CAGCAGTA -0.76562694119  
CAGCAGTC -0.856291329127  
CAGCATAA 0.632121064493  
CAGCATAC -0.184416999405  
CAGCATAG 0.132934496533  
CAGCATCA 1.12548169811  
CAGCATCC 0.513447547721  
CAGCATCG 0.77286877963  
CAGCATGA -0.274118718932  
CAGCATGC -0.914481929224  
CAGCATGG -1.30342845754  
CAGCATT A 1.1664723438  
CAGCATTC 0.137812922601  
CAGCCAAA -0.888305869507  
CAGCCAAC -0.256014906978  
CAGCCAAG -1.26779169103  
CAGCCACA -0.598943898784  
CAGCCACC -1.49427204619  
CAGCCACG -0.653163328325  
CAGCCAGA 0.00302157122506  
CAGCCAGC -0.512779456367  
CAGCCAGG -1.17330485867  
CAGCCATA 0.359198427734  
CAGCCATC -0.847866477594  
CAGCCATG -1.10721609095  
CAGCCCAA 0.0436873195983  
CAGCCCAC -1.49876911651  
CAGCCCAG -0.652649452112  
CAGCCCCA -1.00362742872  
CAGCCCCC -1.16417479959  
CAGCCCCG -1.00560295081  
CAGCCCGA -0.224724132232  
CAGCCCGC -0.503172637266  
CAGCCCGG -1.54725775461  
CAGCCCTA -0.55471944001  
CAGCCCTC -1.11090679905  
CAGCCCTG -1.65685348863  
CAGCCGAA 0.202407633129  
CAGCCGAC -1.08618585067  
CAGCCGAG -0.599902907852  
CAGCCGCA 0.317646072995  
CAGCCGCC -1.45517511014  
CAGCCGCG -0.503179433188  
CAGCCGGA -0.306104507336  
CAGCCGGC -1.48483878447  
CAGCCGGG -1.12996935869  
CAGCCGTA -0.954005701414  
CAGCCGTC -0.883237680402  
CAGCCTAA -0.835305523719  
CAGCCTAC -0.113058778754  
CAGCCTAG -0.854800931279  
CAGCCTCA -0.0201410200967

CAGCCTCC -1.03227459003  
CAGCCTCG -1.48837919816  
CAGCCTGA -0.156394017346  
CAGCCTGC -1.42353539097  
CAGCCTGG -0.520111471456  
CAGCCTTA -0.303983657084  
CAGCCTTC -1.41605203594  
CAGCGAAA 0.302169668822  
CAGCGAAC -0.3969602266  
CAGCGAAG -0.270201131603  
CAGCGACA -0.512546826748  
CAGCGACC -1.04619342128  
CAGCGACG -0.343440254204  
CAGCGAGA -0.566687841812  
CAGCGAGC -0.461539515614  
CAGCGAGG -1.35806087  
CAGCGATA -0.0410695829357  
CAGCGATC 2.8252503851  
CAGCGATG -0.0852893368407  
CAGCGCAA 0.792204221654  
CAGCGCAC -0.510171390823  
CAGCGCAG -0.729419055901  
CAGCGCCA -0.606646291592  
CAGCGCCC -0.520406048513  
CAGCGCCG -0.956191897065  
CAGCGCGA 0.61788439322  
CAGCGCGC -0.564697159593  
CAGCGCGG -0.353030344882  
CAGCGCTA -0.664992675119  
CAGCGCTC -0.218125815276  
CAGCGCTG -0.364391557241  
CAGCGGAA 2.05985319833  
CAGCGGAC -0.19177123193  
CAGCGGAG -0.555063679569  
CAGCGGCA -0.556114694958  
CAGCGGCC -1.11605836889  
CAGCGGCG -1.35161990476  
CAGCGGGA 0.125943845805  
CAGCGGGC -1.35105113841  
CAGCGGGG -0.867907911303  
CAGCGGTA -0.796442524199  
CAGCGGTC -0.785752278392  
CAGCGTAA 0.462177548085  
CAGCGTAC -0.306020342463  
CAGCGTAG -0.0489068486461  
CAGCGTCA -0.741955178524  
CAGCGTCC 0.259358500327  
CAGCGTCG -1.12611920781  
CAGCGTGA -0.726284306445  
CAGCGTGC -0.792452011405  
CAGCGTGG -1.30020666801  
CAGCGTTA 0.549184423379  
CAGCGTTC -1.10017551633  
CAGCTAAA -0.460375060613

CAGCTAAC -0.676023239761  
CAGCTAAG -1.0037952357  
CAGCTACA -0.746283657718  
CAGCTACC -1.88896557161  
CAGCTACG -0.831828625758  
CAGCTAGA -0.117523176378  
CAGCTAGC -1.06237189641  
CAGCTAGG -1.29992803523  
CAGCTATA 1.16905139599  
CAGCTATC -0.231792151911  
CAGCTATG 0.607308632551  
CAGCTCAA -0.0574932340045  
CAGCTCAC -1.16919986073  
CAGCTCAG -1.40117628667  
CAGCTCCA -1.28612865537  
CAGCTCCC -1.08847555343  
CAGCTCCG -1.23751847483  
CAGCTCGA -0.497915207887  
CAGCTCGC -0.75652040646  
CAGCTCGG -0.365890319301  
CAGCTCTA 0.0656770917084  
CAGCTCTC 0.0748492332186  
CAGCTGAA -0.159314695275  
CAGCTGAC -0.285348717731  
CAGCTGAG 0.0335331674399  
CAGCTGCA -0.309648318986  
CAGCTGCC -1.0183013914  
CAGCTGCG -1.03603456425  
CAGCTGGA 0.134864538222  
CAGCTGGC -0.540659985458  
CAGCTGGG -0.588267506201  
CAGCTGTA 0.966058006707  
CAGCTGTC -0.184667664354  
CAGCTTAA -0.23404839783  
CAGCTTAC -0.291697153883  
CAGCTTAG -0.698253744319  
CAGCTTCA -0.863747761855  
CAGCTTCC -1.09843314663  
CAGCTTCG -0.705614250003  
CAGCTTGA -0.182859426487  
CAGCTTGC -0.299360339451  
CAGCTTGG -0.328338148473  
CAGCTTTA -0.000626531680489  
CAGCTTTC 0.0829395163119  
CAGGAAAA 0.677980987899  
CAGGAAAC -0.214921276936  
CAGGAAAG -0.466767931636  
CAGGAACA -0.674467496515  
CAGGAACC -0.769794409323  
CAGGAACG 0.0525047662857  
CAGGAAGA -0.418725471921  
CAGGAAGC -0.844464334768  
CAGGAAGG -1.06951127327  
CAGGAATA 1.55840620235

CAGGAATC 4.07523231847  
CAGGAATG -0.214418117367  
CAGGACAA -0.544775177272  
CAGGACAC -0.418380186835  
CAGGACAG -0.587805644925  
CAGGACCA -0.867680247935  
CAGGACCC -1.35451392177  
CAGGACCG -1.30374838861  
CAGGACGA -0.342514963361  
CAGGACGC -0.980099164548  
CAGGACGG -0.359654538616  
CAGGACTA -0.0252047657146  
CAGGACTC -1.31911867185  
CAGGACTG -0.636459998951  
CAGGAGAA 0.119949320332  
CAGGAGAC -0.528832206954  
CAGGAGAG -0.0513792571425  
CAGGAGCA -1.134867127  
CAGGAGCC -1.74705078766  
CAGGAGCG -0.637049675827  
CAGGAGGA -1.42728464855  
CAGGAGGC -1.77961187695  
CAGGAGGG -1.43803893285  
CAGGAGTA 0.129961280903  
CAGGAGTC -1.1407618047  
CAGGATAA 0.983763995875  
CAGGATAC 4.39116006887  
CAGGATAG 0.42689207844  
CAGGATCA 0.787712378964  
CAGGATCC 3.59086216616  
CAGGATCG 2.46241692354  
CAGGATGA 0.861736691872  
CAGGATGC -0.609714388741  
CAGGATGG -1.07041330115  
CAGGATTA 2.25484543565  
CAGGATTC 8.13749200706  
CAGGCAAA -0.64687500994  
CAGGCAAC 0.224591089  
CAGGCAAG -1.00323849291  
CAGGCACA -0.961208855378  
CAGGCACC -0.819846370732  
CAGGCACG -0.373828478306  
CAGGCAGA -0.587511067868  
CAGGCAGC -1.43745500637  
CAGGCAGG -1.30802563701  
CAGGCATA 0.673044012355  
CAGGCATC 0.760156747194  
CAGGCATG -1.07122645929  
CAGGCCAA -1.45478565157  
CAGGCCAC -1.56138150903  
CAGGCCAG -0.61438318677  
CAGGCCCA -1.00934384418  
CAGGCCCC -1.36940378564  
CAGGCCCG -0.875773144844

CAGGCCGA -1.10545516315  
CAGGCCGC -0.920937793211  
CAGGCCGG -0.885428580922  
CAGGCCTA -0.720447916836  
CAGGCCTC -1.70594670235  
CAGGCCTG -1.31526433887  
CAGGCGAA -0.47626209527  
CAGGCGAC 0.154935508052  
CAGGCGAG -0.455179840054  
CAGGCGCA -0.740408845015  
CAGGCGCC -0.409868556613  
CAGGCGCG -0.0825971064239  
CAGGCGGA -0.0928401283242  
CAGGCGGC -0.928871770111  
CAGGCGGG -0.415573732662  
CAGGCGTA -0.42140986089  
CAGGCGTC -0.858779681901  
CAGGCTAA -0.819556759926  
CAGGCTAC -0.739136178034  
CAGGCTAG -1.25884303078  
CAGGCTCA -0.835226063715  
CAGGCTCC -1.14913072058  
CAGGCTCG -1.35760554326  
CAGGCTGA -0.927235521334  
CAGGCTGC -1.58326437607  
CAGGCTGG -0.899745757725  
CAGGCTTA -0.875981727356  
CAGGCTTC -1.51518414199  
CAGGGAAA 1.04894263288  
CAGGGAAC -0.528038129672  
CAGGGAAG -1.21651803205  
CAGGGACA -0.82009206943  
CAGGGACC -1.04315093953  
CAGGGACG -0.308970295131  
CAGGGAGA 0.183218826179  
CAGGGAGC -0.787679183501  
CAGGGAGG -1.48681665899  
CAGGGATA 0.679782429844  
CAGGGATC 0.923662957709  
CAGGGATG -0.876906495435  
CAGGGCAA -0.0658804465884  
CAGGGCAC -0.955274447671  
CAGGGCAG -0.530765646604  
CAGGGCCA -1.16932976739  
CAGGGCCC 0.0573847606431  
CAGGGCCG -1.76967362599  
CAGGGCGA -0.68933435881  
CAGGGCGC -1.07307024505  
CAGGGCGG -0.48280369242  
CAGGGCTA -0.688745988843  
CAGGGCTC -1.43677280041  
CAGGGGAA -0.522952950763  
CAGGGGAC -1.40299158184  
CAGGGGAG -0.580283866798

CAGGGGCA -1.22294645097  
CAGGGGCC -0.978366465962  
CAGGGGCG -0.524169943464  
CAGGGGGA -0.582413604025  
CAGGGGGC -0.817160674855  
CAGGGGGG -1.36094390898  
CAGGGGTA 0.0889356100751  
CAGGGGTC -0.812917144679  
CAGGGTAA 0.444282318642  
CAGGGTAC 0.160419816654  
CAGGGTAG -0.0499897525895  
CAGGGTCA -0.429592150304  
CAGGGTCC -1.62717517693  
CAGGGTCG -0.979100164096  
CAGGGTGA -1.09808812293  
CAGGGTGC -1.03889172646  
CAGGGTGG -0.680371583957  
CAGGGTTA -0.533289547274  
CAGGGTTC -0.675044627074  
CAGGTAAA 0.145879681351  
CAGGTAAC -0.653585720981  
CAGGTAAG -0.373777247514  
CAGGTACA -0.280398934488  
CAGGTACC -0.612384401722  
CAGGTACG 0.688226884997  
CAGGTAGA -0.00558049702898  
CAGGTAGC -0.558103286124  
CAGGTAGG -0.758805404354  
CAGGTATA -0.560458595667  
CAGGTATC 2.28289586277  
CAGGTATG 0.355478967654  
CAGGTCAA -1.02215023537  
CAGGTCAC -0.895206866348  
CAGGTCAG -0.280395536527  
CAGGTCCA -1.23550635932  
CAGGTCCC -1.13971915352  
CAGGTCCG -0.67778756552  
CAGGTCGA -0.580130174421  
CAGGTCGC -1.4618358973  
CAGGTCGG -1.00546075922  
CAGGTCTA 0.602688974261  
CAGGTCTC -0.774466866695  
CAGGTGAA 0.385367952912  
CAGGTGAC -0.374032355949  
CAGGTGAG -0.597735793057  
CAGGTGCA -0.254453413336  
CAGGTGCC -1.57448692077  
CAGGTGCG 0.0216894446588  
CAGGTGGA -0.623257353263  
CAGGTGGC -0.150759675708  
CAGGTGGG -0.732388612188  
CAGGTGTA 0.653973088503  
CAGGTGTC -0.81438846167  
CAGGTTAA -0.351515115783



CAGGTTAC -0.0345481121689  
CAGGTTAG 0.028468114914  
CAGGTTCA 0.170492940519  
CAGGTTCC -0.824245422957  
CAGGTTCCG -0.604564648578  
CAGGTTGA -0.871180147477  
CAGGTTGC -0.0138239497362  
CAGGTTGG -0.0957367591474  
CAGGTTTA 0.145036464329  
CAGGTTTC -0.025998058852  
CAGTAAAA 1.66260074711  
CAGTAAAC 0.195861853874  
CAGTAAAG 1.21645739152  
CAGTAACA -0.425017449648  
CAGTAACC -0.367415219519  
CAGTAACG 0.132067755168  
CAGTAAGA 2.08647909578  
CAGTAAGC -0.629432232037  
CAGTAAGG 0.694811871491  
CAGTAATA 0.502751551518  
CAGTAATC 7.58239251821  
CAGTAATG 0.420934146389  
CAGTACAA 2.09740144844  
CAGTACAC -0.32942314347  
CAGTACAG 0.0609928721648  
CAGTACCA -0.161845391867  
CAGTACCC -0.340112866514  
CAGTACCG -0.417063607747  
CAGTACGA 0.363403534817  
CAGTACGC -0.235491224228  
CAGTACGG -1.03863217453  
CAGTACTA 0.175952679251  
CAGTACTC 1.07681793434  
CAGTACTG -0.0310056074272  
CAGTAGAA 0.983959509307  
CAGTAGAC -0.954238853796  
CAGTAGAG -0.710558544232  
CAGTAGCA -0.201520504  
CAGTAGCC -0.951237670335  
CAGTAGCG -0.987275657589  
CAGTAGGA 0.293031768301  
CAGTAGGC -0.973642255034  
CAGTAGGG -0.562198874319  
CAGTAGTA 0.538521622639  
CAGTAGTC -0.585253253661  
CAGTATAA 0.835121511077  
CAGTATAC 0.865043953179  
CAGTATAG 0.0810701151526  
CAGTATCA 2.02825111811  
CAGTATCC 3.34978391037  
CAGTATCG 1.77642511256  
CAGTATGA -0.194360739381  
CAGTATGC -0.393863900239  
CAGTATGG -0.602051203172

CAGTATTA 0.995121548892  
CAGTATTC 0.672774527931  
CAGTCAAA 0.575899974706  
CAGTCAAC -0.596645309048  
CAGTCAAG -1.06298745007  
CAGTCACA -0.465229439575  
CAGTCACC 0.31418172135  
CAGTCACG -0.630783836259  
CAGTCAGA -0.0347935494855  
CAGTCAGC -0.178706857106  
CAGTCAGG -1.09146053123  
CAGTCATA 0.366592913025  
CAGTCATC -0.603454299568  
CAGTCATG 0.483909336562  
CAGTCCAA -0.00263420370295  
CAGTCCAC -1.15518614796  
CAGTCCAG -0.628339918356  
CAGTCCCA -0.682969717  
CAGTCCCC -0.897302362586  
CAGTCCCG -0.748491025278  
CAGTCCGA -0.344947119092  
CAGTCCGC -1.10487254358  
CAGTCCGG -1.40379376195  
CAGTCCTA -0.00540145063718  
CAGTCCTC -1.0299260764  
CAGTCGAA -0.26457724523  
CAGTCGAC 0.0625386829109  
CAGTCGAG -0.488105556669  
CAGTCGCA 0.583641574753  
CAGTCGCC -0.967309501778  
CAGTCGCG -0.611119053426  
CAGTCGGA -0.532763124744  
CAGTCGGC -0.743736232704  
CAGTCGGG -1.10959884556  
CAGTCGTA -0.291828367443  
CAGTCGTC -0.756672530548  
CAGTCTAA -0.0145788197793  
CAGTCTAC -0.523450098555  
CAGTCTAG -0.105629006949  
CAGTCTCA -0.56470813762  
CAGTCTCC -1.10051949451  
CAGTCTCG -0.7723423571  
CAGTCTGA -0.815302513104  
CAGTCTGC -0.635734403647  
CAGTCTGG -0.415049139803  
CAGTCTTA 1.13296531452  
CAGTCTTC 0.637887665217  
CAGTGAAA 0.347916152617  
CAGTGAAC -0.653329305637  
CAGTGAAG -1.67438226107  
CAGTGACA -0.307464214388  
CAGTGACC -1.12506897657  
CAGTGACG -0.188920865649  
CAGTGAGA -0.157691515578

CAGTGAGC -0.550537073127  
CAGTGAGG -0.696486804745  
CAGTGATA 0.716701534451  
CAGTGATC 0.514839404708  
CAGTGATG -0.604167871319  
CAGTGCAA -0.407141039681  
CAGTGCAC 0.0268266385045  
CAGTGCAG -1.06531348487  
CAGTGCCA -0.43146259699  
CAGTGCCC -1.16244183962  
CAGTGCCG -0.641009868355  
CAGTGCGA -0.0716316257982  
CAGTGCGC -0.031756818128  
CAGTGCGG -0.352257962273  
CAGTGCTA 0.0504011672182  
CAGTGCTC -1.01135177758  
CAGTGGAA -0.307974431259  
CAGTGGAC -0.982776496214  
CAGTGGAG -0.425347574601  
CAGTGGCA -0.636608725078  
CAGTGGCC -0.870485133819  
CAGTGGCG -0.420305262274  
CAGTGGGA 0.373315124856  
CAGTGGGC -0.403163857349  
CAGTGGGG -0.803860272451  
CAGTGGTA -0.0709023711513  
CAGTGGTC -0.790876925921  
CAGTGTA 1.66417635536  
CAGTGTAC -0.311336321319  
CAGTGTAG 0.0122031224727  
CAGTGTCA -0.283422335384  
CAGTGTCC -0.161148287156  
CAGTGTCCG -0.263915949797  
CAGTGTGA 0.201575394134  
CAGTGTGC -0.586062491075  
CAGTGTGG -1.14997864247  
CAGTGTTA 0.30751544518  
CAGTGTTTC 0.22219840189  
CAGTTAAA 2.74345859537  
CAGTTAAC -0.88774389908  
CAGTTAAG 0.652722116195  
CAGTTACA 0.404588909798  
CAGTTACC 0.174330022317  
CAGTTACG 1.06757391289  
CAGTTAGA 0.792975558738  
CAGTTAGC -0.221473329349  
CAGTTAGG -0.21058443353  
CAGTTATA 0.61449296704  
CAGTTATC 0.693202283636  
CAGTTATG 0.332423020022  
CAGTTCAA 0.055990812603  
CAGTTCAC -0.414583096421  
CAGTTCAG -1.40035188912  
CAGTTCCA 0.141043076338

CAGTTCCC -1.1710478286  
CAGTTCCG 0.54889925606  
CAGTTCGA 0.153963952668  
CAGTTCGC -1.43760922151  
CAGTTCGG -0.671858385445  
CAGTTCTA -0.00222357321899  
CAGTTCTC -0.287472965944  
CAGTTGAA 0.66607035143  
CAGTTGAC -0.272400134952  
CAGTTGAG -0.889168428767  
CAGTTGCA -0.0697601335861  
CAGTTGCC -1.0554549553  
CAGTTGCG 0.487278283925  
CAGTTGGA 0.291326514782  
CAGTTGGC -0.08112709634  
CAGTTGGG -0.416100677955  
CAGTTGTA 1.22926744206  
CAGTTGTC 0.191604731855  
CAGTTTAA 1.03677244449  
CAGTTTAC -0.25308795589  
CAGTTTAG 0.430126414282  
CAGTTTCA -0.500028216692  
CAGTTTCC -0.0243733108645  
CAGTTTCG 0.191650212252  
CAGTTTGA -0.0594434020763  
CAGTTTGC -0.029576372872  
CAGTTTGG -0.164066089889  
CAGTTTTA 1.11433168208  
CAGTTTTC 0.528665184116  
CATAAAAA 0.920315705018  
CATAAAAC 1.59323425421  
CATAAAAG 1.70538995955  
CATAAACA 0.24174294919  
CATAAAC 0.140182608131  
CATAAACG 0.153568482316  
CATAAAGA 1.13606268641  
CATAAAGC -0.85353349193  
CATAAAGG -0.771216325194  
CATAAATA 0.758334394722  
CATAAATC 2.16370219663  
CATAAATG -0.494933366664  
CATAACAA 1.1358342389  
CATAACAC 0.150808292685  
CATAACAG 1.10860716379  
CATAACCA -0.0846317007506  
CATAACCC -0.294617309049  
CATAACCG -0.277614174987  
CATAACGA 0.785255653363  
CATAACGC -0.0336649037632  
CATAACGG 0.0968005822344  
CATAACTA 0.0750933636273  
CATAACTC 0.884551907056  
CATAAGAA 2.55015226934  
CATAAGAC 0.233316006604

CATAAGAG 0.795641912377  
CATAAGCA 0.689267967886  
CATAAGCC -0.748608908377  
CATAAGCG -0.306882117578  
CATAAGGA 0.564341942007  
CATAAGGC -0.215547808616  
CATAAGGG -1.13005195528  
CATAAGTA 0.583286095785  
CATAAGTC -0.738976212499  
CATAATAA 2.2377369648  
CATAATAC 1.80692416245  
CATAATAG 0.717212796849  
CATAATCA 3.34772370064  
CATAATCC 3.85912410772  
CATAATCG 2.74870452396  
CATAATGA 0.40795602749  
CATAATGC 0.814551825167  
CATAATGG 1.39041102434  
CATAATTA 1.94580195367  
CATAATTC 2.47335600463  
CATAACAA 0.669375521685  
CATAACAAC 0.989462114621  
CATAACAAG 0.214886774565  
CATAACACA 0.825206000314  
CATAACACC 1.17911118939  
CATAACACG 0.233943845192  
CATAACAGA 2.17375362582  
CATAACAGC -1.24288725277  
CATAACAGG 0.143342972982  
CATAACATA 0.937512000078  
CATAACATC 0.118195711219  
CATAACATG 0.890598186085  
CATAACCAA 0.73943885792  
CATAACCAC -0.116915725553  
CATAACCAG -0.120951718744  
CATAACCCA 1.12629799282  
CATAACCCC -0.549853560259  
CATAACCCG 0.146733615018  
CATAACCGA 0.584314893739  
CATAACCGC -0.561090877742  
CATAACCGG -0.873266495359  
CATAACCTA 0.472994041202  
CATAACCTC -0.474077206527  
CATAACGAA 2.68302429567  
CATAACGAC 0.533195972664  
CATAACGAG -0.213366579215  
CATAACGCA 0.155003990029  
CATAACGCC -0.404072158387  
CATAACGCG -0.148028760816  
CATAACGGA 0.943915326364  
CATAACGGC -0.117085884971  
CATAACGGG -0.364498200932  
CATAACGTA 0.491139935593  
CATAACGTC 0.311457602379

CATACTAA 0.284328022607  
CATACTAC -0.207414136178  
CATACTAG -0.351646590725  
CATACTCA 0.694502395684  
CATACTCC -0.927101693958  
CATACTCG -0.415003398024  
CATACTGA -1.26026128731  
CATACTGC 0.568895209372  
CATACTGG -0.194360739381  
CATACTTA 0.237356443282  
CATACTTC 1.23411371819  
CATAGAAA 0.0607320133341  
CATAGAAC 0.129993692221  
CATAGAAG 1.14637157647  
CATAGACA -0.201967989288  
CATAGACC -0.679055527632  
CATAGACG -0.444400463123  
CATAGAGA 0.26515777375  
CATAGAGC -0.657610736145  
CATAGAGG 0.436728129198  
CATAGATA 3.32722484914  
CATAGATC 2.06258359046  
CATAGATG -0.216282029513  
CATAGCAA 0.264535162793  
CATAGCAC -1.33401585441  
CATAGCAG -0.525025968184  
CATAGCCA -0.621069327941  
CATAGCCC -0.750460535588  
CATAGCCG 0.12657429821  
CATAGCGA -0.117848073699  
CATAGCGC -0.175689206605  
CATAGCGG -0.991340664137  
CATAGCTA 0.600279035965  
CATAGCTC 0.442299739253  
CATAGGAA 0.678858707292  
CATAGGAC 1.06757391289  
CATAGGAG -0.811465431306  
CATAGGCA -0.36055395268  
CATAGGCC -1.19102705349  
CATAGGCG -0.0459576801226  
CATAGGGA -0.190694862527  
CATAGGGC -0.570848775404  
CATAGGGG -0.69802268299  
CATAGGTA -0.612932518924  
CATAGGTC -0.168837872266  
CATAGTAA 1.75072894944  
CATAGTAC 0.871459825782  
CATAGTAG 0.301847646699  
CATAGTCA -0.180485558852  
CATAGTCC -0.018273187227  
CATAGTCG -0.883349028961  
CATAGTGA 0.323021646854  
CATAGTGC -0.799100513627  
CATAGTGG 1.2324633548

CATAGTTA 0.65858725778  
CATAGTTC 0.474408638388  
CATATAAA 0.277127482459  
CATATAAC 0.490557577402  
CATATAAG 0.924307524719  
CATATACA 1.64807002155  
CATATACC 0.524226924652  
CATATACG 0.838823197209  
CATATAGA 0.420204891742  
CATATAGC -0.329613167888  
CATATAGG 0.353444373327  
CATATATA 2.52249914224  
CATATATC 3.31987035524  
CATATATG 2.09426513069  
CATATCAA 1.62469466561  
CATATCAC 2.043998575  
CATATCAG 2.36316144538  
CATATCCA 6.89984310282  
CATATCCC 3.48579643655  
CATATCCG 6.76243349202  
CATATCGA 2.95937835  
CATATCGC 3.15167182235  
CATATCGG 2.84123047161  
CATATCTA 8.18727448405  
CATATCTC 4.33314642411  
CATATGAA 1.10528944722  
CATATGAC 0.359516267753  
CATATGAG 0.446011096504  
CATATGCA 0.407335246205  
CATATGCC 0.57795547956  
CATATGCG 0.0504633760376  
CATATGGA 0.511874553289  
CATATGGC -0.096623888277  
CATATGGG 0.709126173098  
CATATGTA 1.44787236979  
CATATGTC 0.463071995899  
CATATTAA 0.269600476701  
CATATTAC 1.96846007851  
CATATTAG 1.16549007177  
CATATTCA 0.340970198142  
CATATTCC 3.82237908326  
CATATTGC 1.87970273069  
CATATTGA 1.23910662939  
CATATTGC 2.45611632022  
CATATTGG 0.23264791525  
CATATTTA 2.90900724166  
CATATTTT 3.34975463563  
CATCAAAA 0.342511042637  
CATCAAAC 0.209937252704  
CATCAAAG 1.68640110952  
CATCAACA 0.606288721571  
CATCAACC -0.854061221369  
CATCAACG 1.96800945665  
CATCAAGA 1.59549990986

CATCAAGC -0.413090084757  
CATCAAGG -0.00694543171213  
CATCAATA 0.247671606502  
CATCAATC 0.340660199571  
CATCAATG 0.944674117131  
CATCACAA 0.744400664716  
CATCACAC -0.409916912208  
CATCACAG -0.142978345659  
CATCACCA 1.10739801254  
CATCACCC -0.618630114907  
CATCACCG 0.201254417537  
CATCACGA -0.196185182906  
CATCACGC 1.03108242858  
CATCACGG -0.596951125512  
CATCACTA -0.31041808778  
CATCACTC 1.14971464706  
CATCAGAA 1.43478786859  
CATCAGAC -0.270720758212  
CATCAGAG 0.528161240403  
CATCAGCA 1.15852294539  
CATCAGCC -0.731602899117  
CATCAGCG -0.876043152031  
CATCAGGA -0.211888466302  
CATCAGGC -0.919448963652  
CATCAGGG -0.701463510292  
CATCAGTA 0.140900884751  
CATCAGTC -0.0140868996197  
CATCATAA 1.05532504864  
CATCATAC 0.304837329369  
CATCATAG -0.266801602593  
CATCATCA 0.0266269429668  
CATCATCC -0.197053492561  
CATCATCG 1.04581102001  
CATCATGA 0.588789485244  
CATCATGC -0.635520332121  
CATCATGG -0.310902689255  
CATCATA 0.621386383815  
CATCATTC -0.628221773876  
CATCCAAA 0.575069826764  
CATCCAAC 0.926461309053  
CATCCAAG 0.760045660017  
CATCCACA 1.18167063796  
CATCCACC 0.383782412164  
CATCCACG 0.390346226749  
CATCCAGA 0.687891009649  
CATCCAGC -0.396685775926  
CATCCAGG -0.121085284739  
CATCCATA -0.256636995171  
CATCCATC -0.747002457101  
CATCCATG -0.116043233793  
CATCCCAA 1.49807880772  
CATCCCAC 0.247084543442  
CATCCCAG 0.754885464591  
CATCCCCA -0.298085320037



CATCCCC -0.767689764729  
CATCCCCG 1.0241762041  
CATCCCGA 1.73504840625  
CATCCCGC 0.180823525253  
CATCCCGG -1.20295912325  
CATCCCTA -0.928590784898  
CATCCCTC -0.159289079879  
CATCCGAA 0.482589098131  
CATCCGAC 0.224335719183  
CATCCGAG 0.301401206936  
CATCCGCA -0.243537595213  
CATCCGCC -0.657972749652  
CATCCGCG -0.226000458555  
CATCCGGA 0.910251990891  
CATCCGGC -0.0554021812536  
CATCCGGG 0.229540088099  
CATCCGTA 0.175709071606  
CATCCGTC -0.695546876533  
CATCCTAA -0.350063663792  
CATCCTAC -0.312621795998  
CATCCTAG -0.181471751606  
CATCCTCA 0.272185279282  
CATCCTCC -0.948565566301  
CATCCTCG 0.0187096944887  
CATCCTGA -0.295091978024  
CATCCTGC -0.398509173925  
CATCCTGG 0.744970737972  
CATCCTTA 0.701534083322  
CATCCTTC -0.53416778943  
CATCGAAA 0.649189282572  
CATCGAAC -0.113692629119  
CATCGAAG 0.217538229453  
CATCGACA -0.338645731627  
CATCGACC -1.0303678113  
CATCGACG -0.608707808223  
CATCGAGA 1.87878528129  
CATCGAGC 1.224221209  
CATCGAGG -0.474464835431  
CATCGATA 0.911816621112  
CATCGATC 1.05175326916  
CATCGATG -0.479725140007  
CATCGCAA 1.20896776333  
CATCGCAC -0.0482641113068  
CATCGCAG 0.44114469399  
CATCGCCA -0.368531318925  
CATCGCCC -1.07922525882  
CATCGCCG -0.600350654522  
CATCGCGA 0.550380244171  
CATCGCGC 0.524919063112  
CATCGCGG 0.0894040058913  
CATCGCTA 0.108709127651  
CATCGCTC -0.878845162717  
CATCGGAA 0.512486708982  
CATCGGAC -0.338671347024

CATCGGAG -1.10888265999  
CATCGGCA 0.67421081979  
CATCGGCC -0.812078893907  
CATCGGCG -0.693783596301  
CATCGGGA -0.407434832592  
CATCGGGC -0.292474502743  
CATCGGGG -0.0144983142484  
CATCGGTA 0.799414432921  
CATCGGTC 0.222746519093  
CATCGTAA 0.908935411803  
CATCGTAC 0.450282594511  
CATCGTAG 0.360791809931  
CATCGTCA 0.198100064462  
CATCGTCC -0.379189937559  
CATCGTCG 0.132067755168  
CATCGTGA 0.435963849418  
CATCGTGC 0.498167179744  
CATCGTGG 0.162852495148  
CATCGTTA 0.18348465126  
CATCGTTC -0.30015049601  
CATCTAAA 0.599453592892  
CATCTAAC -0.0851594301886  
CATCTAAG 1.16145643102  
CATCTACA -0.459084096921  
CATCTACC -0.182176959146  
CATCTACG 0.477928925694  
CATCTAGA 0.0796139582932  
CATCTAGC -0.217642520709  
CATCTAGG 0.976462562432  
CATCTATA 1.30943683624  
CATCTATC -0.592184570767  
CATCTCAA 1.15694027984  
CATCTCAC -0.381817345341  
CATCTCAG -0.302446733312  
CATCTCCA 0.625709896759  
CATCTCCC -0.56902616155  
CATCTCCG -0.562386546303  
CATCTCGA 0.608245162802  
CATCTCGC -0.101444287631  
CATCTCGG -0.465159650689  
CATCTCTA 1.01687686171  
CATCTCTC 0.287821387609  
CATCTGAA 0.53935333887  
CATCTGAC 0.478071640044  
CATCTGAG 1.47278125154  
CATCTGCA 0.713150404117  
CATCTGCC -1.10844745964  
CATCTGCG 0.553578247971  
CATCTGGA -0.484398381524  
CATCTGGC 0.603117901456  
CATCTGGG 0.666201042227  
CATCTGTA 0.948271512008  
CATCTGTC -0.323733650316  
CATCTTAA 2.25213412437

CATCTTAC 0.26008383425  
CATCTTAG 0.208917080343  
CATCTTCA 0.91374326484  
CATCTTCC -0.229023859451  
CATCTTCG -0.49068852958  
CATCTTGA 0.0835710142427  
CATCTTGC 0.556031052848  
CATCTTGG -0.0697928062854  
CATCTTTA 0.771112295319  
CATCTTTC 0.443362255432  
CATGAAAA 1.60038042698  
CATGAAAC 0.796770035336  
CATGAAAG -0.196391151602  
CATGAACA 0.462477614154  
CATGAACC -0.385141073689  
CATGAACG 1.32207672735  
CATGAAGA 1.01660659314  
CATGAAGC -0.848468178023  
CATGAAGG -0.756279674012  
CATGAATA 1.03791285239  
CATGAATC 1.15682239674  
CATGAATG 0.247368403853  
CATGACAA 1.09287094631  
CATGACAC 0.164223441608  
CATGACAG -0.635489750475  
CATGACCA -0.594662468276  
CATGACCC -1.11564747702  
CATGACCG -1.17004647572  
CATGACGA -0.357929942859  
CATGACGC -0.619360415081  
CATGACGG -0.542512919577  
CATGACTA -0.182775261614  
CATGACTC -0.417995171748  
CATGAGAA 1.20434549123  
CATGAGAC -0.597489832977  
CATGAGAG 0.839514812907  
CATGAGCA 0.288784840164  
CATGAGCC -1.35685903743  
CATGAGCG -0.999263401628  
CATGAGGA -0.507569075675  
CATGAGGC -1.44626147503  
CATGAGGG -0.470760274101  
CATGAGTA 0.835222142991  
CATGAGTC -0.421087577385  
CATGATAA 1.10945221048  
CATGATAC 2.55937015263  
CATGATAG 0.694052035198  
CATGATCA 1.28122252285  
CATGATCC 1.35653962912  
CATGATCG 0.824549148369  
CATGATGA 0.284637237032  
CATGATGC 0.374841331982  
CATGATGG -0.747901609784  
CATGATTA 1.57984576621

CATGATTC 2.01457066687  
CATGCAAA -0.190826860232  
CATGCAAC 0.357831140617  
CATGCAAG 1.32414059642  
CATGCACA -0.0888566728338  
CATGCACC -0.195278450157  
CATGCACG -0.564210728447  
CATGCAGA -0.16793819682  
CATGCAGC -0.992748726783  
CATGCAGG -0.354262759098  
CATGCATA 0.289757179693  
CATGCATC -0.0387790960287  
CATGCATG -0.379292399144  
CATGCCAA 0.479078220562  
CATGCCAC 0.154118690571  
CATGCCAG -0.976611811322  
CATGCCCA -0.711811607593  
CATGCCCC -0.619267624615  
CATGCCCG -0.915533467376  
CATGCCGA 0.682722450012  
CATGCCGC -0.346038387247  
CATGCCGG -0.755888647148  
CATGCCTA -0.439878300167  
CATGCCTC -0.767852344081  
CATGCGAA 1.07191467702  
CATGCGAC -0.474911275193  
CATGCGAG -0.0768051516855  
CATGCGCA 0.531085577675  
CATGCGCC -1.78062316233  
CATGCGCG 0.0368710103935  
CATGCGGA 0.211221943238  
CATGCGGC -0.919448963652  
CATGCGGG -0.497450471413  
CATGCGTA -0.880551723143  
CATGCGTC -0.855317159927  
CATGCTAA 0.430670087997  
CATGCTAC -0.563065092921  
CATGCTAG 0.0344788460465  
CATGCTCA -0.544136360656  
CATGCTCC -0.697482668618  
CATGCTCG 0.210691338602  
CATGCTGA -0.291461387685  
CATGCTGC -0.90955985243  
CATGCTGG -0.909385249526  
CATGCTTA -0.338316129438  
CATGCTTC -0.0888566728338  
CATGGAAA 0.836481218128  
CATGGAAC -1.08847555343  
CATGGAAG -0.996138584674  
CATGGACA 0.0186584636963  
CATGGACC -1.44095830387  
CATGGACG 0.486666389614  
CATGGAGA 0.513339858504  
CATGGAGC -1.57679021537

CATGGAGG -0.773125979118  
CATGGATA 3.26403271225  
CATGGATC 2.28248575505  
CATGGCAA -0.293795525318  
CATGGCAC -0.413441904382  
CATGGCAG -0.431603220287  
CATGGCCA -0.446548497061  
CATGGCCC -1.58116339082  
CATGGCCG -0.358194722414  
CATGGCGA -0.210839019203  
CATGGCGC -0.551417406335  
CATGGCGG -0.722749904533  
CATGGCTA -0.561329519137  
CATGGCTC 0.201770907567  
CATGGGAA 0.210691338602  
CATGGGAC -0.534653436431  
CATGGGAG -0.408640847266  
CATGGGCA -0.232543885375  
CATGGGCC -1.54465178012  
CATGGGCG -1.3242459332  
CATGGGGA -0.559631584304  
CATGGGGC -1.11560042833  
CATGGGGG 0.0119252738384  
CATGGGTA -0.39589588075  
CATGGGTC -0.413946370859  
CATGGTAA 1.34339919225  
CATGGTAC -0.485157172291  
CATGGTAG -0.785251994021  
CATGGTCA -0.967139603742  
CATGGTCC -1.40816615325  
CATGGTCG -0.964901131773  
CATGGTGA 0.275810119226  
CATGGTGC -0.0144439468769  
CATGGTGG -0.521089299999  
CATGGTTA -0.137854220893  
CATGGTTC -0.577999914431  
CATGTAAG 1.21970897855  
CATGTAAC 0.33948084582  
CATGTAAG 0.5517331553  
CATGTACA 0.488740713943  
CATGTACC -0.646725499668  
CATGTACG -0.796582363352  
CATGTAGA 0.708595045699  
CATGTAGC -0.854775054501  
CATGTAGG 0.0412112517596  
CATGTATA 1.08357255749  
CATGTATC 0.218642043924  
CATGTCAA 0.0796458468476  
CATGTCAC 0.273291184806  
CATGTCAG 0.119265807464  
CATGTCCA 0.381410635581  
CATGTCCC 0.221378709212  
CATGTCCG -0.295971265705  
CATGTCSA -0.00537714214895

CATGTCGC 0.471080727935  
CATGTCGG -0.536624776412  
CATGTCTA -0.443070814955  
CATGTCTC -0.313528005984  
CATGTGAA 1.07433742302  
CATGTGAC -0.180306773842  
CATGTGAG -1.33714668315  
CATGTGCA 0.0566319816528  
CATGTGCC -0.330717766504  
CATGTGCG 0.639322911549  
CATGTGGA 0.606120391825  
CATGTGGC -1.4652498023  
CATGTGGG -1.01508378398  
CATGTGTA 0.118586738083  
CATGTGTC 0.00852522206544  
CATGTTAA 0.807325146859  
CATGTTAC 0.00648592287012  
CATGTTAG 0.546156840377  
CATGTTCA -0.65076645911  
CATGTTCC -0.67819270699  
CATGTTCG -0.128882559065  
CATGTTGA 1.06725607288  
CATGTTGC -0.368461791421  
CATGTTGG 0.71377249231  
CATGTTTA 0.387202851701  
CATGTTTC 0.0186584636963  
CATTAAAA 0.142969720066  
CATTAAAC 0.0475994179136  
CATTAAAG 0.313327526301  
CATTAAACA 0.487836595009  
CATTAAACC 0.615386107946  
CATTAAACG 0.627593412524  
CATTAAAGA -0.0251381134082  
CATTAAAGC 0.198520888829  
CATTAAAGG -0.820598104196  
CATTAAATA 0.642808435103  
CATTAAATC 1.58150789176  
CATTAAATG 0.638740814739  
CATTACAA 0.992479503741  
CATTACAC 0.859084191458  
CATTACAG 0.340701236482  
CATTACCA 0.310809898789  
CATTACCC -0.178998820346  
CATTACCG -0.536640982071  
CATTACGA 2.50585566925  
CATTACGC 0.0165877987097  
CATTACGG 0.185125604906  
CATTACTA 1.41181190372  
CATTACTC -0.617030982316  
CATTAGAA 1.3836506508  
CATTAGAC -0.489484605959  
CATTAGAG 0.418207413602  
CATTAGCA -0.419922599621  
CATTAGCC -0.646790845067

CATTAGCG 0.314418533074  
CATTAGGA 0.58976626826  
CATTAGGC -1.07692091869  
CATTAGGG -0.645396635645  
CATTAGTA 0.0462995672473  
CATTAGTC -0.527642136557  
CATTATAA 0.291748384675  
CATTATAC -0.131454553949  
CATTATAG 1.38671874795  
CATTATCA 2.01600695873  
CATTATCC 1.12222671312  
CATTATCG 1.16578804679  
CATTATGA 2.23531813953  
CATTATGC 0.356672958775  
CATTATGG 0.50399494376  
CATTATTA 1.48100719168  
CATTATTC 2.73404755108  
CATTCAAA 1.37191331033  
CATTCAAC 0.326869706679  
CATTCAAG 0.69399008776  
CATTCACA 0.571694606242  
CATTCACC 0.361746375511  
CATTCACG 0.175438280275  
CATTCAGA -0.0467057542442  
CATTCAGC -0.737388319316  
CATTCAGG 0.00158135864287  
CATTCATA 2.11792957468  
CATTCATC 0.785267676916  
CATTCCAA 0.138202119794  
CATTCCAC -0.913987133867  
CATTCCAG -0.771085634397  
CATTCCCA -0.124205396825  
CATTCCCC -0.0027811001587  
CATTCCCG -0.606346225522  
CATTCCGA 0.752055486074  
CATTCCGC -0.45977100775  
CATTCCGG 0.443320695759  
CATTCCCTA 0.858586520903  
CATTCCCTC -0.422444932002  
CATTCGAA 1.09413028283  
CATTCGAC -0.799680780765  
CATTCGAG 0.181283034095  
CATTCGCA -0.69097583522  
CATTCGCC -0.517221375173  
CATTCGCG -0.363443787582  
CATTCGGA 0.305904289035  
CATTCGGC -0.696068594195  
CATTCGGG 1.0072020834  
CATTCGTA 0.187608730048  
CATTCGTC -0.407371055483  
CATTCTAA 0.26987754119  
CATTCTAC 1.2930866334  
CATTCTAG 0.278266322063  
CATTCTCA -0.088495443471

CATTCTCC 0.446403430277  
CATTCTCG 0.638610646705  
CATTCTGA 0.072416293343  
CATTCTGC -0.736425389524  
CATTCTGG -0.441871857584  
CATTCTTA 0.118230213589  
CATTCTTC 0.733246727961  
CATTGAAA 1.30266156394  
CATTGAAC 1.02717947862  
CATTGAAG -0.274714407584  
CATTGACA 1.05012120249  
CATTGACC 0.292174959436  
CATTGACG -0.0921328297312  
CATTGAGA 0.133550834332  
CATTGAGC -0.955884250929  
CATTGAGG -0.270875496115  
CATTGATA 1.93369136028  
CATTGATC -0.0911275561212  
CATTGCAA -0.346489531878  
CATTGCAC -0.0995309743639  
CATTGCAG 1.10207732881  
CATTGCCA -0.0703231495393  
CATTGCCC -0.604720954772  
CATTGCCG -0.852906698868  
CATTGCGA 1.38599602784  
CATTGCGC 0.214014282805  
CATTGCGG 0.0322659894728  
CATTGCTA -0.285567232743  
CATTGCTC -0.428633402618  
CATTGGAA 0.677144044036  
CATTGGAC -0.434996214757  
CATTGGAG 0.578803924214  
CATTGGCA 0.565689886886  
CATTGGCC -0.898866731425  
CATTGGCG -0.672873591555  
CATTGGGA 1.36113576307  
CATTGGGC -1.49028101063  
CATTGGGG -1.56339597698  
CATTGGTA 0.759982144289  
CATTGGTC 0.471270752354  
CATTGTAA 0.0475183896195  
CATTGTAC 0.643996153065  
CATTGTAG -0.268472353741  
CATTGTCA -0.401064701768  
CATTGTCC -0.993506994786  
CATTGTCCG 0.206562293564  
CATTGTGA -0.182353653103  
CATTGTGC 0.196084812374  
CATTGTGG -0.35712148959  
CATTGTTA -0.443480399912  
CATTGTTC -0.557562487607  
CATTTAAA 1.52069354323  
CATTTAAC 0.43164791654  
CATTTAAG 1.04090854683



CATTTACA 1.55632612763  
CATTTACC -0.081203681147  
CATTTACG -0.0335577373097  
CATTTAGA 1.72100724841  
CATTTAGC -0.0348118461971  
CATTTAGG 1.45554836306  
CATTTATA 0.976732831  
CATTTATC 1.38761476405  
CATTTCAA 0.94732400373  
CATTTCAC 0.107558003111  
CATTTCAG 0.407116208429  
CATTTCCA 0.0234537704173  
CATTTCCC 0.982940382473  
CATTTCCG 0.803814269291  
CATTTCGA -0.124266560118  
CATTTCGC 1.67854763815  
CATTTCGG -0.134011650082  
CATTTCTA -0.0110266439187  
CATTTCTC 0.966988002418  
CATTTGAA 1.38306332636  
CATTTGAC -0.55105251763  
CATTTGAG 0.420010423836  
CATTTGCA 0.505907211501  
CATTTGCC 0.247677356897  
CATTTGCG 0.642036313875  
CATTTGGA 0.634271712247  
CATTTGGC -0.553758862653  
CATTTGGG 1.3468052558  
CATTTGTA 1.00361279135  
CATTTGTC 0.128621700235  
CATTTTAA 0.200817387512  
CATTTTAC 1.625339494  
CATTTTAG 1.33868909593  
CATTTTCA -0.220831898918  
CATTTTCC -0.682969717  
CATTTTCG 0.880348106882  
CATTTTGA 1.56923994665  
CATTTTGC -0.614390505455  
CATTTTGG 0.38666806496  
CATTTTTA 1.39228878971  
CATTTTTTC 0.325740538194  
CCAAAAAA 1.13850372911  
CCAAAAAC 2.28181008363  
CCAAAAAG 0.028468114914  
CCAAAAACA 1.04935038817  
CCAAAACC -0.567158590062  
CCAAAACG 0.703248223815  
CCAAAAGA 0.185226498202  
CCAAAAGC 0.361988414867  
CCAAAAGG 0.0217427665039  
CCAAAATA 3.13643144576  
CCAAAATC 6.1255456114  
CCAAACAA 0.209887328819  
CCAAACAC 1.02669487714

CCAAACAG 0.947854085602  
CCAAACCA -0.23842863058  
CCAAACCC -0.539238069587  
CCAAACCG -0.436516410107  
CCAAACGA 1.03724031755  
CCAAACGC -0.648104026195  
CCAAACGG -0.813877460654  
CCAAACTA 0.738146325938  
CCAAACTC -0.705313922551  
CCAAAGAA 0.00815066224143  
CCAAAGAC -0.0751466854724  
CCAAAGAG -0.365101992413  
CCAAAGCA -0.261565606505  
CCAAAGCC -1.27744111533  
CCAAAGCG -0.722880072567  
CCAAAGGA -0.669988984285  
CCAAAGGC -1.27601501736  
CCAAAGGG -1.11855430172  
CCAAAGTA -0.348366774485  
CCAAAGTC -0.151105222175  
CCAAATAA 0.4161440673  
CCAAATAC 0.897520093454  
CCAAATAG -0.625359906805  
CCAAATCA 1.9387621632  
CCAAATCC 5.09609681778  
CCAAATCG 2.95070335628  
CCAAATGA 0.66212950114  
CCAAATGC 1.89222656837  
CCAAATGG -0.578661732627  
CCAAATTA 1.44292703004  
CCAAATTC 1.07009363146  
CCAACAAA 2.77865885462  
CCAACAAC 0.352790396579  
CCAACAAG -0.730608603534  
CCAACACA -0.0986976898427  
CCAACACC -0.926407464444  
CCAACACG -0.583594003303  
CCAACAGA 0.233752513865  
CCAACAGC 0.025240574993  
CCAACAGG -0.760729695648  
CCAACATA 1.59470687811  
CCAACATC 0.591107939982  
CCAACCAA -0.497640757214  
CCAACCAC -0.460126748099  
CCAACCAG -0.41943538433  
CCAACCCA 0.274609593565  
CCAACCCC -0.604731932798  
CCAACCCG -1.10083079999  
CCAACCGA -0.302429743508  
CCAACCGC -0.872482089196  
CCAACCGG -0.404904397382  
CCAACCTA -0.730092113505  
CCAACCTC -1.47091577111  
CCAACGAA 0.139038802276

CCAACGAC -0.641291376332  
CCAACGAG -1.206387927  
CCAACGCA -0.534208564958  
CCAACGCC -0.421674379063  
CCAACGCG -0.0810298623871  
CCAACGGA -0.413163010222  
CCAACGGC -0.960480646257  
CCAACGGG -0.593454885313  
CCAACGTA 0.468767239448  
CCAACGTC -0.33518425518  
CCAACGTA 0.426721134877  
CCAACGTA -0.155954634886  
CCAACGTA -0.76298332775  
CCAACGTA -0.266679276008  
CCAACGTA -1.0768370152  
CCAACGTA -0.523742323177  
CCAACGTA -0.326961451619  
CCAACGTA 0.251002653534  
CCAACGTA 1.23902664663  
CCAACGTA -0.378801524511  
CCAACGTA 0.136532675554  
CCAAGAAA 1.08532250726  
CCAAGAAC -0.808239459675  
CCAAGAAG -0.972147413699  
CCAAGACA -0.442433305247  
CCAAGACC -0.890910798471  
CCAAGACG -0.562070797338  
CCAAGAGA 0.352386562017  
CCAAGAGC -0.762620007335  
CCAAGAGG -0.460130407442  
CCAAGATA 2.44186370467  
CCAAGATC 3.83570954454  
CCAAGCAA 0.254756615985  
CCAAGCAC -0.114021969928  
CCAAGCAG -0.25499682567  
CCAAGCCA -1.15413591672  
CCAAGCCC -1.15230127931  
CCAAGCCG 0.232258456675  
CCAAGCGA -0.668117753455  
CCAAGCGC -0.666800651604  
CCAAGCGG -0.392777075572  
CCAAGCTA -0.120595717013  
CCAAGCTC -0.346273107918  
CCAAGGAA -0.132094938854  
CCAAGGAC -1.60465218637  
CCAAGGAG -1.30624850355  
CCAAGGCA -0.768795931634  
CCAAGGCC -1.44409174642  
CCAAGGCG -0.801005201301  
CCAAGGGA -1.10719021417  
CCAAGGGC -1.45451459886  
CCAAGGGG -0.693979632497  
CCAAGGTA -0.561458903026  
CCAAGGTC -0.796232112016

CCAAGTAA 0.250929205306  
CCAAGTAC -0.335292989923  
CCAAGTAG -0.255939629079  
CCAAGTCA 0.458852774211  
CCAAGTCC -0.236974303391  
CCAAGTCG -0.586128359237  
CCAAGTGA 0.345455767674  
CCAAGTGC 0.278467585891  
CCAAGTGG -0.98093584703  
CCAAGTTA 0.337989925208  
CCAAGTTC -1.00582930727  
CCAATAAA 2.14745994439  
CCAATAAC -0.096724258809  
CCAATAAG 0.224648592951  
CCAATACA -0.522896492339  
CCAATACC 0.447744579235  
CCAATACG -0.311538369291  
CCAATAGA -0.286473965492  
CCAATAGC 0.524340887027  
CCAATAGG -0.386478301923  
CCAATATA 1.14593454645  
CCAATATC 3.99119552223  
CCAATCAA -0.052199472584  
CCAATCAC 1.04427226656  
CCAATCAG 0.609686682292  
CCAATCCA 1.4318481098  
CCAATCCC -0.602577102939  
CCAATCCG 1.58482273314  
CCAATCGA 0.742810157717  
CCAATCGC 0.239850023687  
CCAATCGG 0.107666215091  
CCAATCTA 2.60168574162  
CCAATCTC 2.70988125444  
CCAATGAA -0.0894787610271  
CCAATGAC 0.0468087385922  
CCAATGAG -1.09080603172  
CCAATGCA 0.010612615474  
CCAATGCC -0.430172940206  
CCAATGCG 0.352981466524  
CCAATGGA -0.248601602213  
CCAATGGC -0.677159726932  
CCAATGGG -0.865843780857  
CCAATGTA 0.368114938046  
CCAATGTC 0.789284589251  
CCAATTAA 0.365596265007  
CCAATTAC 0.948339993985  
CCAATTAG -0.170009907333  
CCAATTCA -0.319233704796  
CCAATTCC 2.08505247504  
CCAATTCCG -0.207316902225  
CCAATTGA -0.0111479249783  
CCAATTGC 0.450282594511  
CCAATTGG -0.0695599152852  
CCAATTTA 0.906136276314

CCAATTC 0.568408778226  
CCACAAA 0.833941111799  
CCACAAAC 0.183874371216  
CCACAAAG -1.30862106428  
CCACAACA 1.57615531948  
CCACAACC -0.423387996792  
CCACAACG 0.97243937694  
CCACAAGA -0.205186119472  
CCACAAGC -0.758521543943  
CCACAAGG -1.01320654137  
CCACAATA 1.3538758893  
CCACAATC 3.04682905124  
CCACACAA 1.38481902652  
CCACACAC -0.348366774485  
CCACACAG 0.274784719233  
CCACACCA 0.487976434162  
CCACACCC -0.852084392374  
CCACACCG 0.389595016048  
CCACACGA -0.37370118547  
CCACACGC -0.67212656296  
CCACACGG -1.09220390048  
CCACACTA 0.0290436771837  
CCCACTC -0.218255721928  
CCACAGAA -0.0436230197262  
CCACAGAC -0.0928610388517  
CCACAGAG -0.543239299026  
CCACAGCA 0.232993461717  
CCACAGCC -0.916750982841  
CCACAGCG -1.06966810222  
CCACAGGA 0.235683339699  
CCACAGGC -0.473449367938  
CCACAGGG -1.69063705963  
CCACAGTA -0.728544473087  
CCACAGTC -1.58277559249  
CCACATAA 0.063335374009  
CCACATAC 0.277727353217  
CCACATAG -0.918744278875  
CCACATCA -0.129797917407  
CCACATCC 0.723828887753  
CCACATCG -0.268918793504  
CCACATGA 0.833721289879  
CCACATGC -0.835751963482  
CCACATGG 0.160825480888  
CCACATTA 0.15268527391  
CCACATTC 2.44131271227  
CCACCAA 1.08455221571  
CCACCAAC -0.517951413965  
CCACCAAG -0.989840072406  
CCACCACA -0.289609760474  
CCACCACC -0.32561533641  
CCACCACG -0.929640231997  
CCACCAGA -0.140031790951  
CCACCAGC 0.368047501595  
CCACCAGG -0.627401035671

CCACCATA 1.72255410468  
CCACCATC -0.699563266105  
CCACCCAA -0.760955790727  
CCACCCAC -0.0228212269602  
CCACCCAG -0.889426151018  
CCACCCCA -0.498769925699  
CCACCCCC -0.512564600697  
CCACCCCG -0.468779524382  
CCACCCGA -0.984937076469  
CCACCCGC -1.07199439841  
CCACCCGG 0.548723346247  
CCACCCTA 0.621895293778  
CCACCCTC -0.443480399912  
CCACCGAA -0.0692190736868  
CCACCGAC -1.29840104396  
CCACCGAG -0.65076645911  
CCACCGCA -0.70807541909  
CCACCGCC -0.356004606039  
CCACCGCG -0.149275551018  
CCACCGGA 0.881358346742  
CCACCGGC -1.23172625871  
CCACCGGG -0.578682904536  
CCACCGTA 0.520663248001  
CCACCGTC -0.969157731029  
CCACCTAA -0.15451050158  
CCACCTAC -0.3360402799  
CCACCTAG 0.479490942099  
CCACCTCA 0.0523696320016  
CCACCTCC -0.962118201943  
CCACCTCG -1.19200566618  
CCACCTGA 0.218781098932  
CCACCTGC -0.484777646216  
CCACCTGG -0.520878103671  
CCACCTTA -0.0666397601186  
CCACCTTC -1.38501349443  
CCACGAAA -0.0859482798388  
CCACGAAC -0.216594380518  
CCACGAAG -0.237726298237  
CCACGACA -0.00257879080505  
CCACGACC -0.323033670408  
CCACGACG -0.346258470549  
CCACGAGA -0.252821346664  
CCACGAGC -1.61210391423  
CCACGAGG -0.548344342936  
CCACGATA 0.569805601463  
CCACGATC 1.7138487907  
CCACGCAA 1.24253098965  
CCACGCAC -0.583274856377  
CCACGCAG -0.390838146908  
CCACGCCA -0.916953292194  
CCACGCCC -1.12360680793  
CCACGCCG -1.02032683737  
CCACGCGA -0.562003622268  
CCACGCGC -0.36464718844

CCACGCGG -0.540383705113  
CCACGCTA 0.464544619799  
CCACGCTC -0.485625045344  
CCACGGAA 0.955106640687  
CCACGGAC 0.925630115584  
CCACGGAG -0.646725499668  
CCACGGCA -0.410195544987  
CCACGGCC -0.0367382285438  
CCACGGCG -1.23370909948  
CCACGGGA 0.228185347298  
CCACGGGC -1.28898973829  
CCACGGGG -0.549560812874  
CCACGGTA -0.733021155646  
CCACGGTC -0.737330292602  
CCACGTAA 0.312860960156  
CCACGTAC -0.366745821257  
CCACGTAG -0.619499470089  
CCACGTCA 0.314776625857  
CCACGTCC -0.320983393185  
CCACGTCCG -1.09630863703  
CCACGTGA -0.209666722754  
CCACGTGC -1.19962258721  
CCACGTGG 0.284537389263  
CCACGTTA 0.576737964096  
CCACGTTC -0.801168303416  
CCACTAAA 0.105986315588  
CCACTAAC -0.371626076996  
CCACTAAG 0.378023130124  
CCACTACA -0.32119249846  
CCACTACC -0.580391294633  
CCACTACG -0.296262183419  
CCACTAGA 0.225165344362  
CCACTAGC -1.01651327992  
CCACTAGG -0.547212822016  
CCACTATA -0.438293543564  
CCACTATC 0.22765108332  
CCACTCAA 0.488281727864  
CCACTCAC 1.16991866012  
CCACTCAG -0.49572143217  
CCACTCCA -0.552683800157  
CCACTCCC -1.24875370126  
CCACTCCG -0.578202485166  
CCACTCGA -0.351014047267  
CCACTCGC -0.368213217525  
CCACTCGG 0.356913429841  
CCACTCTA -0.0546990647661  
CCACTCTC -0.511563770574  
CCACTGAA -0.240965338948  
CCACTGAC 1.75146787521  
CCACTGAG 0.41062734738  
CCACTGCA -0.444368313187  
CCACTGCC -0.568700480084  
CCACTGCG -0.657722346085  
CCACTGGA 0.151669545037

CCACTGGC -0.803590003883  
CCACTGGG 0.210825950123  
CCACTGTA -0.00655701866365  
CCACTGTC -0.985038492527  
CCACTTAA -0.788733596851  
CCACTTAC 0.4662799322  
CCACTTAG -0.979516806357  
CCACTTCA -0.305889390284  
CCACTTCC -0.872029114894  
CCACTTCG -0.901345674462  
CCACTTGA 0.253246353136  
CCACTTGC -0.317352280083  
CCACTTTA 0.786615883178  
CCACTTTC 0.0569712549616  
CCAGAAAA 1.12775650212  
CCAGAAAC -0.323794290846  
CCAGAAAG -0.402916067598  
CCAGAACA -0.610796508539  
CCAGAACC 0.438378753963  
CCAGAACG -0.252377520718  
CCAGAAGA -0.0383948650857  
CCAGAAGC -0.159041812891  
CCAGAAGG -1.33760619199  
CCAGAATA 0.259080913074  
CCAGAATC 7.97288538004  
CCAGACAA -0.531231689986  
CCAGACAC -0.430096094017  
CCAGACAG -1.08645298266  
CCAGACCA -1.13475891502  
CCAGACCC -0.945988082404  
CCAGACCG -0.0468521279368  
CCAGACGA -0.436725254001  
CCAGACGC -1.0451962505  
CCAGACGG -0.455751220218  
CCAGACTA -0.73718888516  
CCAGACTC -0.48721685925  
CCAGAGAA 0.897813363602  
CCAGAGAC -0.985411745443  
CCAGAGAG -0.549053993963  
CCAGAGCA -0.372645465212  
CCAGAGCC -1.54111842373  
CCAGAGCG -1.40049120551  
CCAGAGGA -1.10878176669  
CCAGAGGC -1.42983677844  
CCAGAGGG -0.990726417391  
CCAGAGTA 0.0107469656133  
CCAGAGTC -1.20591900842  
CCAGATAA 0.644196894129  
CCAGATAC 4.05814998579  
CCAGATAG 0.272471492128  
CCAGATCA 1.2672780762  
CCAGATCC 1.6712861961  
CCAGATCG 3.91236074247  
CCAGATGA 0.728818662379



CCAGATGC -0.00202152524694  
CCAGATGG -0.660011526085  
CCAGATTA 1.43619279465  
CCAGATTC 20.1944987708  
CCAGCAAA 0.4959297533  
CCAGCAAC -0.590920529379  
CCAGCAAG 0.66279210348  
CCAGCACA 0.500531114879  
CCAGCACC -1.09553181094  
CCAGCACG -0.116091589388  
CCAGCAGA 0.303232446383  
CCAGCAGC -1.50857275595  
CCAGCAGG -1.57570783419  
CCAGCATA 0.628847521411  
CCAGCATC -0.0835976751652  
CCAGCCAA -0.422911759528  
CCAGCCAC -0.64827706081  
CCAGCCAG -1.16135318529  
CCAGCCCA -1.73068856126  
CCAGCCCC -0.260052207077  
CCAGCCCG -0.991337266176  
CCAGCCGA 0.363358054419  
CCAGCCGC -0.799289231138  
CCAGCCGG -1.74489778747  
CCAGCCTA -0.576328117757  
CCAGCCTC -1.29738557647  
CCAGCGAA -0.794652321663  
CCAGCGAC -1.55916865246  
CCAGCGAG -0.375842162105  
CCAGCGCA 0.346066093696  
CCAGCGCC -0.995339018378  
CCAGCGCG -0.655060697315  
CCAGCGGA 0.812588849397  
CCAGCGGC -0.950426341868  
CCAGCGGG -0.838990742811  
CCAGCGTA -0.320178860639  
CCAGCGTC -0.645650959936  
CCAGCTAA -0.417022832218  
CCAGCTAC -0.997756275358  
CCAGCTAG -0.805898264739  
CCAGCTCA -0.741374388622  
CCAGCTCC -1.85338892287  
CCAGCTCG -0.456832555872  
CCAGCTGA 0.284151328649  
CCAGCTGC -1.03548514014  
CCAGCTGG -0.612102109601  
CCAGCTTA -0.62272047547  
CCAGCTTC -1.35644527037  
CCAGGAAA 0.20716843748  
CCAGGAAC -1.27463178596  
CCAGGAAG -0.545864615755  
CCAGGACA -0.333588781931  
CCAGGACC -1.48773881325  
CCAGGACG -0.211416933907

CCAGGAGA 0.283510682363  
CCAGGAGC -1.08495239093  
CCAGGAGG -0.959782234638  
CCAGGATA 2.40786841458  
CCAGGATC 4.4066526787  
CCAGGCAA -0.0779675156334  
CCAGGCAC -1.78136156534  
CCAGGCAG -0.754487903186  
CCAGGCCA -1.09220912812  
CCAGGCCC -1.00934384418  
CCAGGCCG -0.669238296348  
CCAGGCCG 0.368038876002  
CCAGGCCG -1.2191558951  
CCAGGCCG -0.474372044965  
CCAGGCTA -0.0786518126462  
CCAGGCTC -1.64831415196  
CCAGGGAA -0.28440722123  
CCAGGGAC -0.835631466567  
CCAGGGAG -1.32356372724  
CCAGGGCA -0.683676754211  
CCAGGGCC -1.31442451981  
CCAGGGCG -0.0435958360404  
CCAGGGGA -0.921005229662  
CCAGGGGC -1.04731422555  
CCAGGGGG -1.18962029775  
CCAGGGTA -0.178758872043  
CCAGGGTC -1.38230767217  
CCAGGTAA -0.156154069042  
CCAGGTAC -0.67994082709  
CCAGGTAG -0.635446883893  
CCAGGTCA -0.542083208237  
CCAGGTCC -1.2085762137  
CCAGGTCC -1.04837203686  
CCAGGTGA -0.835743599271  
CCAGGTGC -1.02133263374  
CCAGGTTA -0.398220608645  
CCAGGTTC -0.810415984207  
CCAGTAAA 0.200968204692  
CCAGTAAC -0.347725866817  
CCAGTAAG -0.946318468738  
CCAGTACA 1.02721345822  
CCAGTACC -0.239815521317  
CCAGTACG -0.575685641799  
CCAGTAGA -0.673376489742  
CCAGTAGC -0.369776018075  
CCAGTAGG -0.938543934611  
CCAGTATA -0.580194474293  
CCAGTATC 1.98655578764  
CCAGTCAA -0.200295669851  
CCAGTCAC -0.583194089464  
CCAGTCAG -1.11913352334  
CCAGTCCA -0.0949369314702  
CCAGTCCC -0.987503320957  
CCAGTCCG -0.862962310166

CCAGTCGA -0.189191134217  
CCAGTCGC -0.592226914585  
CCAGTCGG -1.31867380038  
CCAGTCTA -0.798719942026  
CCAGTCTC -0.910452731955  
CCAGTGAA -0.702239813626  
CCAGTGAC -0.742021569449  
CCAGTGAG -1.08315748352  
CCAGTGCA -0.270592942612  
CCAGTGCC -1.08105388445  
CCAGTGCG -0.368227593513  
CCAGTGGA -0.756681417522  
CCAGTGGC -0.54845647564  
CCAGTGGG -0.252104115571  
CCAGTGTA -0.48796127403  
CCAGTGTC -0.317950059789  
CCAGTTAA -0.00605046113474  
CCAGTTAC 0.444061973959  
CCAGTTAG 0.583721034757  
CCAGTTCA -0.5068941884  
CCAGTTCC -0.658228903614  
CCAGTTCG -0.849231412277  
CCAGTTGA -0.552892382669  
CCAGTTGC -0.145850406612  
CCAGTTTA 0.560114094726  
CCAGTTTC -0.53996993805  
CCATAAAA 0.942810727749  
CCATAAAC 0.156465113139  
CCATAAAG -0.117801025012  
CCATAACA 0.0359101716545  
CCATAACC -0.294617309049  
CCATAACG 0.300595367482  
CCATAAGA 0.206367041513  
CCATAAGC -0.493099513402  
CCATAAGG -0.326842784375  
CCATAATA 1.2441350885  
CCATAATC 4.51154981719  
CCATACAA 0.696642326793  
CCATACAC 0.642525620218  
CCATACAG -0.388578764411  
CCATACCA 0.272031064142  
CCATACCC 0.030579032666  
CCATACCG -0.715266549501  
CCATACGA 0.545424710533  
CCATACGC -0.62594958368  
CCATACGG -0.373050606683  
CCATACTA -0.750460535588  
CCATACTC 0.0107469656133  
CCATAGAA 0.86597708547  
CCATAGAC -0.239459519586  
CCATAGAG -0.692806813285  
CCATAGCA -0.23842863058  
CCATAGCC 0.192719524353  
CCATAGCG -0.00282187568735

CCATAGGA 0.481505671424  
CCATAGGC -0.633641521224  
CCATAGGG -0.754823255771  
CCATAGTA 0.0727202801366  
CCATAGTC -0.746556540102  
CCATATAA 1.07347460238  
CCATATAC 1.35000561204  
CCATATAG -0.0638597054863  
CCATATCA 1.7288588901  
CCATATCC 4.56001780614  
CCATATCG 3.39254358669  
CCATATGA 1.77376790727  
CCATATGC -0.299985302842  
CCATATGG 1.09001927312  
CCATATTA 0.622726487246  
CCATATTC 3.42558927745  
CCATCAAA 0.91251163477  
CCATCAAC 0.143896317817  
CCATCAAG 0.026371311768  
CCATCACA -0.297844326207  
CCATCACC -0.768814228346  
CCATCACG -0.342735046663  
CCATCAGA 0.589794236091  
CCATCAGC -0.83268177528  
CCATCAGG -0.893564605794  
CCATCATA 0.877259621969  
CCATCATC -0.0909150528854  
CCATCCAA 0.185070714772  
CCATCCAC -0.0524734004944  
CCATCCAG 0.197705901019  
CCATCCCA -0.534191313773  
CCATCCCC -0.312067405637  
CCATCCCG -0.661119784043  
CCATCCGA -0.465142660885  
CCATCCGC -0.190136551442  
CCATCCGG -0.157885199339  
CCATCCTA -0.443259271084  
CCATCCTC 0.150848284069  
CCATCGAA -0.000360967981125  
CCATCGAC -1.04932425001  
CCATCGAG 0.337427432018  
CCATCGCA 1.23839044383  
CCATCGCC -0.536640982071  
CCATCGCG 0.0704538403362  
CCATCGGA -1.01658698952  
CCATCGGC -1.04249225791  
CCATCGGG -1.05073335818  
CCATCGTA 0.14741451407  
CCATCGTC -0.123746410746  
CCATCTAA 0.712399193416  
CCATCTAC -0.298463539203  
CCATCTAG -0.877042413864  
CCATCTCA 0.303898969447  
CCATCTCC -0.643484367905

CCATCTCG -0.447652834295  
CCATCTGA -0.032939047077  
CCATCTGC -0.821400545689  
CCATCTTA 0.156572279593  
CCATCTTC -0.472624447628  
CCATGAAA 0.802574536391  
CCATGAAC -0.183887440296  
CCATGAAG -0.382412249849  
CCATGACA -0.333596100616  
CCATGACC -1.00245434813  
CCATGACG -0.734827302459  
CCATGAGA 0.201770907567  
CCATGAGC -0.736398728601  
CCATGAGG -0.899918008196  
CCATGATA 1.13928996495  
CCATGATC 0.849759403097  
CCATGCAA 1.0167691725  
CCATGCAC -0.343585059607  
CCATGCAG -0.342596514419  
CCATGCCA -0.0739030318488  
CCATGCCC -0.711393919806  
CCATGCCG -0.614370640454  
CCATGCGA -0.224716029402  
CCATGCGC -1.66463325039  
CCATGCGG -1.03263738768  
CCATGCTA -0.639279260823  
CCATGCTC -0.544136360656  
CCATGGAA 0.253531781836  
CCATGGAC -1.17187170339  
CCATGGAG -0.591853661669  
CCATGGCA 0.0533343914646  
CCATGGCC -1.02723018665  
CCATGGCG -0.439399710469  
CCATGGGA 0.513118468294  
CCATGGGC -1.14319814254  
CCATGGGG -0.820017575676  
CCATGGTA -0.326472145275  
CCATGGTC -0.624364304314  
CCATGTAA 1.61001312286  
CCATGTAC 0.0344788460465  
CCATGTAG -0.596176913231  
CCATGTCA 0.457687012302  
CCATGTCC -0.660839844356  
CCATGTCC 0.0182224791978  
CCATGTGA -0.271103420865  
CCATGTGC 0.00737827963157  
CCATGTTA 0.74221865117  
CCATGTTC -0.333355106786  
CCATTAAC -0.16231326492  
CCATTAAC 0.646930422838  
CCATTAAG 0.00323329031609  
CCATTACA 0.866341974175  
CCATTACC 0.368086970215  
CCATTACG 0.266854924439

CCATTAGA 0.418207413602  
CCATTAGC -1.20371294777  
CCATTAGG -0.663146536921  
CCATTATA 0.280873342081  
CCATTATC 1.38656976044  
CCATTCAA -0.02437749297  
CCATTCAC -0.274149039197  
CCATTCAG 0.466570327151  
CCATTCCA 0.104718353476  
CCATTCCC -0.859360471802  
CCATTCCG -0.6252279091  
CCATTCGA 0.59089282293  
CCATTCGC -0.723359969173  
CCATTCGG -0.284520660841  
CCATTCTA 0.947987651597  
CCATTCTC -0.410851874169  
CCATTGAA 0.646747455722  
CCATTGAC -0.611418073969  
CCATTGAG -0.687142674146  
CCATTGCA -0.477266323354  
CCATTGCC -0.609723537096  
CCATTGCG 0.488893360793  
CCATTGGA -0.13863104699  
CCATTGGC -0.609261937202  
CCATTGGG -1.13695713422  
CCATTGTA -0.254457595442  
CCATTGTC -0.899470522907  
CCATTTAA 0.196232231593  
CCATTTAC -0.427586307953  
CCATTTAG 1.25944839055  
CCATTTCA 0.401288705794  
CCATTTCC -0.324911435778  
CCATTTCG 0.176546538233  
CCATTTGA -0.51829826734  
CCATTTGC 0.874027115797  
CCATTTTA -0.518423207742  
CCATTTTC -0.352935201982  
CCCAAAAA 2.71281892218  
CCCAAAAC -0.0319288072168  
CCCAAAAG -0.163776479083  
CCCAAAACA 0.986093951403  
CCCAAAACC -1.00358351661  
CCCAAAACG 0.379700415812  
CCCAAAAGA 0.441545130591  
CCCAAAAGC -0.363027929466  
CCCAAAAGG -0.597599874628  
CCCAAATA 0.573285897386  
CCCAAATC 2.56483145965  
CCCAACAA 0.492333142569  
CCCAACAC -0.1419879708  
CCCAACAG -0.37900801597  
CCCAACCA -0.445349801072  
CCCAACCC 0.0102529544009  
CCCAACCG -0.391494476091

CCCAACGA -0.710579977523  
CCCAACGC 0.188000279676  
CCCAACGG -0.335909589103  
CCCAACTA 0.257876466689  
CCCAACTC -0.714279049839  
CCCAAGAA -1.00763022645  
CCCAAGAC -0.562070797338  
CCCAAGAG -1.16769743933  
CCCAAGCA -0.666816334499  
CCCAAGCC -0.680261803687  
CCCAAGCG -0.748502264687  
CCCAAGGA -1.53751397155  
CCCAAGGC -1.46996198967  
CCCAAGGG -1.21192608021  
CCCAAGTA -0.575807445622  
CCCAAGTC -0.606079354915  
CCCAATAA 1.78984209115  
CCCAATAC -0.0387869374765  
CCCAATAG 0.0879214494909  
CCCAATCA 0.881945932565  
CCCAATCC 0.750540779737  
CCCAATCG -0.189390306992  
CCCAATGA -0.970914999484  
CCCAATGC -0.648564580563  
CCCAATTA 0.259358500327  
CCCAATTC 0.235016555253  
CCCACAAA 0.388592356254  
CCCACAAC -0.290356789069  
CCCACAAG -0.911949402961  
CCCACACA 0.353666024919  
CCCACACC -0.0788175285767  
CCCACACG -1.2049579083  
CCCACAGA 0.273712531935  
CCCACAGC -0.565279256402  
CCCACAGG 0.258153531179  
CCCACATA -0.954255843599  
CCCACATC 0.167689361543  
CCCACCAA -0.883062293352  
CCCACCAC -0.339656494251  
CCCACCAG -0.483374549821  
CCCACCCA -0.224351663461  
CCCACCCC -0.654421096555  
CCCACCCG -0.377031448357  
CCCACCGA -0.182812116419  
CCCACCGC -0.0957362363842  
CCCACCGG -1.36711538979  
CCCACCTA -0.201153001479  
CCCACCTC -1.12747577829  
CCCACGAA -0.216594380518  
CCCACGAC -0.471978835091  
CCCACGAG -0.434187238724  
CCCACGCA -0.411455404269  
CCCACGCC -1.84200470893  
CCCACGCG -0.870483304148

CCCACGGA -0.597735793057  
CCCACGGC -0.242469328639  
CCCACGGG -1.03054973289  
CCCACGTA -0.700013887973  
CCCACGTC 0.29444688825  
CCCCTAA -0.367375228135  
CCCCTAC -0.478459268948  
CCCCTAG -0.57608764669  
CCCCTCA 0.445174152641  
CCCCTCC -0.598345334934  
CCCCTCG 0.203064746456  
CCCCTGA 0.131507353031  
CCCCTGC -0.654641441239  
CCCCTTA -0.378730951481  
CCCCTTC -1.43199369935  
CCCAGAAA -0.0482907722294  
CCCAGAAC -0.440927224504  
CCCAGAAG -0.118315946752  
CCCAGACA -0.652994214434  
CCCAGACC -0.568108189393  
CCCAGACG -0.80520481937  
CCCAGAGA -0.720102108987  
CCCAGAGC -0.832293884995  
CCCAGAGG -1.30761265409  
CCCAGATA 2.95890760174  
CCCAGATC 2.61674707182  
CCCAGCAA 0.372505887441  
CCCAGCAC -0.642246987439  
CCCAGCAG -0.197063947824  
CCCAGCCA -1.28325581027  
CCCAGCCC -1.74395054057  
CCCAGCCG -1.0358152651  
CCCAGCGA -0.82727169905  
CCCAGCGC -0.776389066936  
CCCAGCGG -1.42321755095  
CCCAGCTA -1.06498153025  
CCCAGCTC -1.00947113701  
CCCAGGAA -0.915286723152  
CCCAGGAC -0.96142083585  
CCCAGGAG -0.959782234638  
CCCAGGCA -0.813656593208  
CCCAGGCC -1.47263958272  
CCCAGGCG -1.61763997639  
CCCAGGGA -0.183727213379  
CCCAGGGC -0.728566951905  
CCCAGGGG -0.973882203338  
CCCAGGTA -0.464108112537  
CCCAGGTC -1.33769166377  
CCCAGTAA -0.319745489957  
CCCAGTAC -0.222670457049  
CCCAGTAG 0.299341781358  
CCCAGTCA -1.28613336024  
CCCAGTCC -0.960796917986  
CCCAGTCG -0.482459975624



CCCAGTGA -0.674742992715  
CCCAGTGC -0.288201175065  
CCCAGTTA -0.828221559762  
CCCAGTTC -0.728555189733  
CCCATAAA -0.694574014241  
CCCATAAC 0.0359101716545  
CCCATAAG -0.389648860656  
CCCATACA 0.820076386534  
CCCATACC -0.374897529025  
CCCATACG -0.48377629333  
CCCATAGA 0.882028006385  
CCCATAGC 0.0151021057302  
CCCATAGG -0.528615521613  
CCCATATA 0.0831109826375  
CCCATATC 4.38452254468  
CCCATCAA 0.0143958526636  
CCCATCAC -0.477042319328  
CCCATCAG -0.870435471316  
CCCATCCA -0.147406672622  
CCCATCCC -0.766835046917  
CCCATCCG -0.824662065217  
CCCATCGA -0.332572007531  
CCCATCGC -0.107263687437  
CCCATCGG -0.998374704209  
CCCATCTA -0.598267965982  
CCCATCTC -0.839503050735  
CCCATGAA 0.33599924299  
CCCATGAC -0.576513698688  
CCCATGAG 0.298234046163  
CCCATGCA 0.289740451271  
CCCATGCC -0.616722290654  
CCCATGCG -1.00358351661  
CCCATGGA 0.148258515237  
CCCATGGC -1.04187121524  
CCCATGGG -1.15320958035  
CCCATGTA 0.114907530768  
CCCATGTC -0.371915687802  
CCCATTAA -0.682227131892  
CCCATTAC 0.507033243407  
CCCATTAG 0.720394856372  
CCCATTCA -0.622076692604  
CCCATTCC -0.765698036984  
CCCATTCCG -0.910461618929  
CCCATTGA -0.092634943773  
CCCATTGC -0.522499976461  
CCCATTTA -0.407076217046  
CCCATTTTC -0.389068593518  
CCCCAAAA 0.571332592735  
CCCCAAAC -0.00971738351505  
CCCCAAAG -0.557625741952  
CCCCAACA 0.171316031158  
CCCCAACC -1.34231001515  
CCCCAACG -0.998494416979  
CCCCAAGA -0.287310125211

CCCCAAGC -0.32158274118  
CCCCAAGG -0.593744496119  
CCCCAATA 0.0873153055747  
CCCCAATC 0.707646230513  
CCCCACAA -0.757686168369  
CCCCACAC -0.72315452324  
CCCCACAG -0.118950058498  
CCCCACCA -0.27310325144  
CCCCACCC -0.654421096555  
CCCCACCG -0.910509713142  
CCCCACGA -0.503156954371  
CCCCACGC -1.18587365399  
CCCCACGG -0.91923201693  
CCCCACTA -0.8409207845  
CCCCACTC 0.11550975396  
CCCCAGAA -0.597922158134  
CCCCAGAC -1.50002714613  
CCCCAGAG -0.903863301974  
CCCCAGCA -0.64259148838  
CCCCAGCC -0.992428795712  
CCCCAGCG -1.05072551674  
CCCCAGGA -1.11975508877  
CCCCAGGC -1.09676866864  
CCCCAGGG -1.12161769401  
CCCCAGTA -0.251974993063  
CCCCAGTC -1.39703443393  
CCCCATAA -0.593507684395  
CCCCATAC 0.398249622002  
CCCCATAG -0.0622553452631  
CCCCATCA -0.335965002001  
CCCCATCC -1.21964232624  
CCCCATCG 0.489199177258  
CCCCATGA -0.0907145732029  
CCCCATGC -0.771604999624  
CCCCATTA 0.223597054799  
CCCCATTC -0.834236995764  
CCCCAAA 0.1084712704  
CCCCAAC -0.623997063174  
CCCCAAG -1.0957283699  
CCCCACA -0.724553960294  
CCCCACC -1.22683502494  
CCCCACG -0.954277799653  
CCCCAGA -0.166181712509  
CCCCAGC -1.04015707475  
CCCCAGG -1.04127866317  
CCCCATA -0.443296910034  
CCCCATC -1.27880526587  
CCCCCAA -0.8667889367  
CCCCCAC -0.825991190622  
CCCCCAG -1.60065121831  
CCCCCCA -0.788804954026  
CCCCCCC -1.67995099593  
CCCCCCG -1.39586867202  
CCCCCGA -1.24367453413

CCCCCGC -0.612307555533  
CCCCCGG -1.60753940746  
CCCCCCTA -1.33464839787  
CCCCCCTC -0.972061419155  
CCCCCGAA -0.514759160559  
CCCCCGAC -1.61609991604  
CCCCCGAG -0.607640064412  
CCCCCGCA 0.0386792482599  
CCCCCGCC -1.26734525127  
CCCCCGCG 0.202631375774  
CCCCCGGA -0.594637375643  
CCCCCGGC -1.77192542842  
CCCCCGGG -0.970624865915  
CCCCCGTA 0.197535741601  
CCCCCGTC -0.837323651005  
CCCCCTAA -0.421999276384  
CCCCCTAC -0.540504724791  
CCCCCTAG -1.40816615325  
CCCCCTCA -0.903839516249  
CCCCCTCC -1.36602647407  
CCCCCTCG -1.10894120947  
CCCCCTGA -1.02572567419  
CCCCCTGC -0.820747091704  
CCCCCTTA -1.28168882761  
CCCCCTTC -0.945917509373  
CCCCGAAA -0.143890567422  
CCCCGAAC -0.773977560351  
CCCCGAAG -0.967071644528  
CCCCGACA -0.57299968454  
CCCCGACC -1.07786189243  
CCCCGACG -0.848931346207  
CCCCGAGA -0.642074736969  
CCCCGAGC -1.37723347129  
CCCCGAGG -0.489384496808  
CCCCGATA 1.24437268437  
CCCCGATC 1.36204066615  
CCCCGCAA 0.108606666066  
CCCCGCAC -0.674500430596  
CCCCGCAG -0.49725966285  
CCCCGCCA -0.815378313766  
CCCCGCCC -1.01489794167  
CCCCGCCG -1.08262321954  
CCCCGCGA -0.316662755439  
CCCCGCGC -0.309820046693  
CCCCGCGG -0.290019606813  
CCCCGCTA -1.1917774143  
CCCCGCTC -0.839291593026  
CCCCGGAA 0.234801438202  
CCCCGGAC -0.850800224603  
CCCCGGAG -1.23514669825  
CCCCGGCA -0.517162825696  
CCCCGGCC -1.00128440411  
CCCCGGCG -1.61624263039  
CCCCGGGA -0.83463168197

CCCCGGGC -1.32674395709  
CCCCGGGG 0.318661017724  
CCCCGGTA -0.939361274855  
CCCCGGTC -1.08235870137  
CCCCGTAA -0.150776926894  
CCCCGTAC -0.747128704411  
CCCCGTAG 0.0120993539799  
CCCCGTCA 0.234755696423  
CCCCGTCC -0.486502241973  
CCCCGTCCG -1.31653413065  
CCCCGTGA -0.600949741135  
CCCCGTGC -0.531713416263  
CCCCGTTA -0.631054104827  
CCCCGTTC -1.16197605762  
CCCCTAAA -0.0529156581512  
CCCCTAAC -0.216546286305  
CCCCTAAG -0.421648240903  
CCCCTACA 0.00646083023711  
CCCCTACC -0.622424591505  
CCCCTACG -0.429710033403  
CCCCTAGA -0.32778663331  
CCCCTAGC -1.12909059377  
CCCCTAGG -1.69528991339  
CCCCTATA -0.455381103881  
CCCCTATC -0.819208599643  
CCCCTCAA -0.878009002998  
CCCCTCAC -0.941480295436  
CCCCTCAG -0.921292488034  
CCCCTCCA -1.31653099408  
CCCCTCCC -1.59175797097  
CCCCTCCG -1.25077627203  
CCCCTCGA -0.805271733058  
CCCCTCGC -0.296514416657  
CCCCTCGG -0.762291712053  
CCCCTCTA -0.546148998929  
CCCCTCTC -0.741760449236  
CCCCTGAA -0.829643475633  
CCCCTGAC -1.16224737172  
CCCCTGAG -1.10549593868  
CCCCTGCA -0.839192006638  
CCCCTGCC -0.934885637823  
CCCCTGCG 0.333240621648  
CCCCTGGA -1.14040031396  
CCCCTGGC -1.00035571531  
CCCCTGTA 0.402815174302  
CCCCTGTC -0.76830976187  
CCCCTTAA -0.477850249834  
CCCCTTAC -1.38729692403  
CCCCTTAG -1.23656234096  
CCCCTTCA -1.17684553374  
CCCCTTCC -1.36756052264  
CCCCTTCG -1.10159377286  
CCCCTTGA -0.461621589434  
CCCCTTGC -1.2162475021

CCCCTTTA -0.645180734449  
CCCCTTTC -0.692023452648  
CCCGAAAA 0.666624480409  
CCCGAAAC -0.115476035734  
CCCGAAAG -1.21169815546  
CCCGAACA -0.556277535691  
CCCGAACC 0.277622277816  
CCCGAACG -0.912892467752  
CCCGAAGA 0.516819370282  
CCCGAAGC -1.19679051764  
CCCGAAGG -1.27141600821  
CCCGAATA 1.54514579133  
CCCGAATC 5.23253225938  
CCCGACAA -0.238055377664  
CCCGACAC -0.415003398024  
CCCGACAG -0.277338417405  
CCCGACCA -1.22314248717  
CCCGACCC -0.953935651147  
CCCGACCG -1.25194020427  
CCCGACGA -1.28739112846  
CCCGACGC -0.636767906469  
CCCGACGG -0.417733006009  
CCCGACTA -0.443563519259  
CCCGACTC 0.194824953091  
CCCGAGAA 1.31325535994  
CCCGAGAC -1.11639947187  
CCCGAGAG -0.885119627878  
CCCGAGCA -0.519139916072  
CCCGAGCC -1.16457053132  
CCCGAGCG -0.873156453708  
CCCGAGGA -0.0387127051039  
CCCGAGGC -0.315447592409  
CCCGAGGG -0.482943008809  
CCCGAGTA -0.36761047157  
CCCGAGTC -0.688878770692  
CCCGATAA 0.469026268607  
CCCGATAC 1.87934516067  
CCCGATAG 0.206234782427  
CCCGATCA 0.969436625189  
CCCGATCC 1.57576769058  
CCCGATCG 0.990976559576  
CCCGATGA -0.351227334648  
CCCGATGC -0.172338294571  
CCCGATTA 3.26207156615  
CCCGATTC 4.30354339032  
CCCGCAA 0.0852360149956  
CCCGCAAC -0.286725414586  
CCCGCAAG -1.07815176462  
CCCGCACA -0.0120700792414  
CCCGCACC -0.412465644129  
CCCGCACG -1.04063017544  
CCCGCAGA -0.466808445783  
CCCGCAGC -1.50666676137  
CCCGCAGG -0.553949148453

CCCGCATA -0.510993174555  
CCCGCATC 0.530898689835  
CCCGCCAA -0.267737348699  
CCCGCCAC -0.0133338592477  
CCCGCCAG -0.785910675637  
CCCGCCCA -0.562954005743  
CCCGCCCC -0.720340227619  
CCCGCCCG 0.14036452972  
CCCGCCGA -0.673291802106  
CCCGCCGC -0.59846609323  
CCCGCCGG -1.09082537396  
CCCGCCTA 0.0183108261765  
CCCGCCTC -0.346291927393  
CCCGCGAA -0.774057020356  
CCCGCGAC -1.18193933824  
CCCGCGAG -0.586954325073  
CCCGCGCA -0.0892448245006  
CCCGCGCC -1.18151145657  
CCCGCGCG -0.397998172909  
CCCGCGGA -0.190506406398  
CCCGCGGC -0.290019606813  
CCCGCGGG -0.160375381783  
CCCGCGTA 0.864534259071  
CCCGCGTC -0.624287719506  
CCCGCTAA -0.42644276348  
CCCGCTAC -1.27558295358  
CCCGCTAG -0.768250166866  
CCCGCTCA -0.52749497872  
CCCGCTCC -0.924056598389  
CCCGCTCG -0.85993237473  
CCCGCTGA -0.138399985661  
CCCGCTGC -1.1042460119  
CCCGCTTA -0.796235771358  
CCCGCTTC -0.547617963487  
CCCGGAAA 0.616211289638  
CCCGGAAC -0.803780289683  
CCCGGAAG -0.840962344174  
CCCGGACA -0.0792294659686  
CCCGGACC -1.00290078789  
CCCGGACG 0.136585213255  
CCCGGAGA 0.527138192844  
CCCGGAGC -0.756195247757  
CCCGGAGG -1.24059127685  
CCCGGATA 2.14155899352  
CCCGGATC 0.77393312548  
CCCGGCAA -0.889375965752  
CCCGGCAC -1.21249118722  
CCCGGCAG -0.989840072406  
CCCGGCCA -0.781928265673  
CCCGGCCC -1.11531055615  
CCCGGCCG -0.0335227121761  
CCCGGCGA -0.798090012385  
CCCGGCGC -1.02128192571  
CCCGGCGG -1.09082537396

CCCGGCTA -0.904754613209  
CCCGGCTC -1.64664967397  
CCCGGGAA -0.277158064105  
CCCGGGAC -1.29181318227  
CCCGGGAG -1.15002830497  
CCCGGGCA -0.542690659061  
CCCGGGCC -1.8944514485  
CCCGGGCG -1.19057224952  
CCCGGGGA -0.758810631986  
CCCGGGGC -1.0789528992  
CCCGGGTA -0.220558755152  
CCCGGGTC -1.53629384227  
CCCGGTAA -0.0329293759581  
CCCGGTAC -0.82176647992  
CCCGGTAG -0.921617123974  
CCCGGTCA -0.885159096498  
CCCGGTCC -1.02026462855  
CCCGGTCCG -0.940647533678  
CCCGGTGA -0.707900554804  
CCCGGTGC -0.673775358054  
CCCGGTTA -0.945427157503  
CCCGGTTC -1.49312562652  
CCCGTAAA 0.395172637879  
CCCGTAAC 0.0847642212186  
CCCGTAAG -0.78146692716  
CCCGTACA -0.0364402535268  
CCCGTACC -0.645435320121  
CCCGTACG -0.749195448674  
CCCGTAGA -0.787725186662  
CCCGTAGC -1.52229502825  
CCCGTAGG 0.254506735181  
CCCGTATA -0.320863157652  
CCCGTATC 1.86409354466  
CCCGTCAA 0.209719521836  
CCCGTCAC -0.889426151018  
CCCGTCAG -0.571783737366  
CCCGTCCA -0.922975001354  
CCCGTCCC -0.631237856087  
CCCGTCCG -0.590290076974  
CCCGTCGA -1.3046559055  
CCCGTCGC -1.30493244723  
CCCGTCGG -1.2862985534  
CCCGTCTA -1.11982879838  
CCCGTCTC -0.647301061938  
CCCGTGAA -0.494556193024  
CCCGTGAC -0.371183819339  
CCCGTGAG -1.07209973519  
CCCGTGCA -0.0263425597927  
CCCGTGCC -0.82665013362  
CCCGTGCG -1.31627902222  
CCCGTGGA -0.273639867852  
CCCGTGGC -0.828970418029  
CCCGTGTA -0.597109522758  
CCCGTGTC -1.05124854131

CCCGTTAA 0.520110687312  
CCCGTTAC -0.649141711122  
CCCGTTAG -1.32202157584  
CCCGTTCA 0.354186174291  
CCCGTTCC -0.752708940059  
CCCGTTCCG -0.863818857649  
CCCGTTGA -0.271345460221  
CCCGTTGC -0.688531394554  
CCCGTTTA -0.330717766504  
CCCGTTTC 0.903271011282  
CCCTAAAA 1.17813780434  
CCCTAAAC -0.105609141948  
CCCTAAAG -0.767009911204  
CCCTAACA -0.248104715803  
CCCTAACC -1.26628090542  
CCCTAACG -0.260700433429  
CCCTAAGA 0.386064273478  
CCCTAAGC -1.14725347797  
CCCTAAGG -1.5054549963  
CCCTAATA 0.804684147235  
CCCTAATC -0.0027811001587  
CCCTACAA -0.377556563979  
CCCTACAC -0.135633000108  
CCCTACAG -0.754170063168  
CCCTACCA -0.855490978687  
CCCTACCC -0.389334941362  
CCCTACCG -0.872145168322  
CCCTACGA -0.470471186058  
CCCTACGC -1.08974325416  
CCCTACGG -0.935844124128  
CCCTACTA -0.417754700681  
CCCTACTC -1.17148485863  
CCCTAGAA 2.22672809483  
CCCTAGAC -0.47474346821  
CCCTAGAG -0.149875160395  
CCCTAGCA -0.859360471802  
CCCTAGCC -1.03187546033  
CCCTAGCG 0.133211299641  
CCCTAGGA -0.446423033896  
CCCTAGGC -1.09270104828  
CCCTAGGG -1.52682607818  
CCCTAGTA 0.0652541762895  
CCCTAGTC -0.480344614385  
CCCTATAA 0.582238216975  
CCCTATAC 0.59944836526  
CCCTATAG -1.16760517163  
CCCTATCA 0.18905390888  
CCCTATCC -0.728596488025  
CCCTATCG -0.125519100715  
CCCTATGA -0.810786361925  
CCCTATGC -0.441963341142  
CCCTATTA 0.127758095448  
CCCTATTC 0.417093928012  
CCCTCAA -0.303713388516



CCCTCAAC -0.275839916728  
CCCTCAAG -0.788780645538  
CCCTCACA -0.641990310714  
CCCTCACC -1.0035652199  
CCCTCACG -0.239207809111  
CCCTCAGA -0.866547420107  
CCCTCAGC -0.763389253365  
CCCTCAGG -0.805716604531  
CCCTCATA -0.0930847814961  
CCCTCATC -0.225144172453  
CCCTCCAA -0.309257553503  
CCCTCCAC -1.25789107902  
CCCTCCAG -1.15282613355  
CCCTCCCA -0.55847314108  
CCCTCCCC -0.351628294013  
CCCTCCCG -0.320863157652  
CCCTCCGA -0.822771230767  
CCCTCCGC -1.12162083058  
CCCTCCGG -1.1426774704  
CCCTCCTA -1.42999622121  
CCCTCCTC -1.58888015962  
CCCTCGAA -0.460375060613  
CCCTCGAC -1.23325272722  
CCCTCGAG -0.936847829448  
CCCTCGCA -0.0411636803095  
CCCTCGCC -1.55682798029  
CCCTCGCG -1.60755169239  
CCCTCGGA 0.211251217976  
CCCTCGGC -0.485172855186  
CCCTCGTA -0.830371684754  
CCCTCGTC -0.905390293245  
CCCTCTAA -0.39568102508  
CCCTCTAC -0.873944519214  
CCCTCTAG -0.21997456729  
CCCTCTCA -0.967185606903  
CCCTCTCC -1.58676610529  
CCCTCTCG -0.658373709017  
CCCTCTGA -0.0918615156368  
CCCTCTGC -0.125735001912  
CCCTCTTA -0.658955021682  
CCCTCTTC -0.656224106789  
CCCTGAAA -0.104052353175  
CCCTGAAC -0.608393888928  
CCCTGAAG 0.538962050624  
CCCTGACA -0.807238890933  
CCCTGACC -1.43520241979  
CCCTGACG -0.389557899862  
CCCTGAGA 0.45922158364  
CCCTGAGC -0.90848400579  
CCCTGAGG -1.41314547261  
CCCTGATA 1.0076777979  
CCCTGATC -0.463505366581  
CCCTGCAA 0.315745044663  
CCCTGCAC -0.0807297963174

CCCTGCAG -1.03849076709  
CCCTGCCA -0.574902803925  
CCCTGCCC -0.168035430773  
CCCTGCCG -1.36581240255  
CCCTGCGA -0.871015999836  
CCCTGCGC -0.339267035676  
CCCTGCGG -0.0401497811069  
CCCTGCTA -1.54864542949  
CCCTGCTC -0.211449606606  
CCCTGGAA -0.251216986441  
CCCTGGAC -0.903556962746  
CCCTGGAG -1.46971629097  
CCCTGGCA -1.25746764084  
CCCTGGCC -0.368915549868  
CCCTGGCG -0.823449516003  
CCCTGGGA 0.0671248843568  
CCCTGGGC -1.10330346987  
CCCTGGTA -1.16417479959  
CCCTGGTC -1.96815739863  
CCCTGTAA 0.105328940879  
CCCTGTAC 0.0667903159166  
CCCTGTAG -1.00640068743  
CCCTGTCA -0.889240831468  
CCCTGTCC -0.89153210252  
CCCTGTCT -0.240297770357  
CCCTGTGA -0.219310658041  
CCCTGTGC -0.731317470417  
CCCTGTTA 1.22266572714  
CCCTGTTC -0.640975104604  
CCCTTAAA 0.503967760075  
CCCTTAAC -0.141301321353  
CCCTTAAG -1.11125626624  
CCCTTACA 0.577887781727  
CCCTTACC -0.883404964622  
CCCTTACG -0.393159476844  
CCCTTAGA 1.15873544862  
CCCTTAGC -1.09776035041  
CCCTTAGG -1.8042125898  
CCCTTATA -0.544341806589  
CCCTTATC -0.457207638459  
CCCTTCAA -0.529407507842  
CCCTTCAC -1.65106859119  
CCCTTCAG -0.396574427367  
CCCTTCCA -0.156991535669  
CCCTTCCC -1.54019182598  
CCCTTCCG -0.572722620051  
CCCTTCGA -0.91566363541  
CCCTTCGC -1.48492138105  
CCCTTCGG -1.12795044726  
CCCTTCTA -0.801157064007  
CCCTTCTC -0.522894139905  
CCCTTGAA -0.452706124649  
CCCTTGAC -0.896578596953  
CCCTTGAG -0.848271619064

CCCTTGCA -0.615740802769  
CCCTTGCC -1.1598363879  
CCCTTGCG -0.454436470801  
CCCTTGGA -0.501916437326  
CCCTTGGC -0.843528065899  
CCCTTGTA 0.293169255019  
CCCTTGTC -0.89241269711  
CCCTTTAA -0.0230820857909  
CCCTTTAC -0.733575284625  
CCCTTTAG -1.30440184259  
CCCTTTCA -0.859356551079  
CCCTTTCC -1.41367973659  
CCCTTTCCG -1.7675177506  
CCCTTTGA -1.03487298445  
CCCTTTGC -0.536180427702  
CCCTTTTA -0.969022596745  
CCCTTTTC -0.526893539672  
CCGAAAAA -0.00593414632547  
CCGAAAAC 0.670898069469  
CCGAAAAG 1.10712826673  
CCGAAACA 0.207195621166  
CCGAAACC -0.757375647035  
CCGAAACG 0.982624372126  
CCGAAAGA 0.133682047892  
CCGAAAGC -1.21972361592  
CCGAAAGG -1.09902073245  
CCGAAATA 2.66913996679  
CCGAAATC 15.6951753391  
CCGAACAA -0.673575662516  
CCGAACAC -1.2897393807  
CCGAACAG -0.468169982506  
CCGAACCA -0.303475531265  
CCGAACCC -0.958449711273  
CCGAACCG 0.0583142335909  
CCGAACGA -0.698217150896  
CCGAACGC -0.178240290961  
CCGAACGG -0.65564200998  
CCGAACTA -0.0607550149143  
CCGAACTC -0.00462593144819  
CCGAAGAA 1.1587286527  
CCGAAGAC 0.799797356956  
CCGAAGAG -0.864524326571  
CCGAAGCA 0.191968313652  
CCGAAGCC -0.86871087556  
CCGAAGCG -1.06270228275  
CCGAAGGA -1.24919595892  
CCGAAGGC -1.10835257812  
CCGAAGTA -0.100832131938  
CCGAAGTC -0.754170063168  
CCGAATAA 0.751175152866  
CCGAATAC 1.5892027045  
CCGAATAG -0.388893729232  
CCGAATCA 2.29521164071  
CCGAATCC 6.92486202622

CCGAATCG 2.16554493687  
CCGAATGA 0.363752217863  
CCGAATGC 0.305904289035  
CCGAATTA 0.727103999124  
CCGAATTC 1.61626902993  
CCGACAAA 0.189083967764  
CCGACAAC -0.0162135002673  
CCGACAAG -0.209067636141  
CCGACACA -0.182775261614  
CCGACACC -1.03891211422  
CCGACACG -0.494303437023  
CCGACAGA 1.2054195082  
CCGACAGC -0.358881633243  
CCGACAGG 0.267521970266  
CCGACATA 0.532766261323  
CCGACATC -0.45952008142  
CCGACCAA -1.04899177262  
CCGACCAC -1.39791372161  
CCGACCAG -1.65409382176  
CCGACCCA -0.464224950109  
CCGACCCC -1.32937371731  
CCGACCCG -1.38327347716  
CCGACCGA -0.603584990365  
CCGACCGC -1.05932993742  
CCGACCGG -1.30677257365  
CCGACCTA -0.52513182773  
CCGACCTC -1.2344728565  
CCGACGAA 0.441425679203  
CCGACGAC -0.929213134473  
CCGACGAG -0.923748168108  
CCGACGCA -1.01703107685  
CCGACGCC -1.60795108347  
CCGACGCG -0.489576089517  
CCGACGGA 0.143164449354  
CCGACGGC -0.698074697928  
CCGACGTA 2.10785854186  
CCGACGTC -0.548165035163  
CCGACTAA -0.287948157682  
CCGACTAC -1.15233473615  
CCGACTAG -0.689849541932  
CCGACTCA 0.194824953091  
CCGACTCC -0.831922200368  
CCGACTCG -1.07327464546  
CCGACTGA 0.281495430274  
CCGACTGC -1.36740892132  
CCGACTTA 0.179993377311  
CCGACTTC -0.962878560999  
CCGAGAAA 1.87134244041  
CCGAGAAC 0.0997743206278  
CCGAGAAG 0.184328129663  
CCGAGACA -0.435123507593  
CCGAGACC -0.836582634187  
CCGAGACG -1.33525114383  
CCGAGAGA -0.357617069092

CCGAGAGC -0.516192838601  
CCGAGAGG -0.814323377653  
CCGAGATA 4.40783726009  
CCGAGATC 4.48918078039  
CCGAGCAA -0.298571489801  
CCGAGCAC -0.65436124017  
CCGAGCAG -0.495740251645  
CCGAGCCA -1.33929523985  
CCGAGCCC -1.36968032737  
CCGAGCCG -1.08841648119  
CCGAGCGA -0.074460297407  
CCGAGCGC -0.72848252565  
CCGAGCGG -0.728400451829  
CCGAGCTA -0.884507210803  
CCGAGCTC -0.75689104556  
CCGAGGAA 0.991656674484  
CCGAGGAC -1.20429504458  
CCGAGGAG -0.510096897069  
CCGAGGCA -0.693421844175  
CCGAGGCC -0.969319264854  
CCGAGGCG -0.0908201713669  
CCGAGGGA -0.295585727854  
CCGAGGGC -0.528853640245  
CCGAGGTA 0.1763510248  
CCGAGGTC -1.73445324036  
CCGAGTAA 0.00648592287012  
CCGAGTAC -0.00120444638452  
CCGAGTAG -0.974156131248  
CCGAGTCA -0.42763832289  
CCGAGTCC -0.770117476973  
CCGAGTCG -1.24792329194  
CCGAGTGA -0.238055377664  
CCGAGTGC -1.13062594926  
CCGAGTTA 0.356893303458  
CCGAGTTC -0.510241441091  
CCGATAAA 0.324367239299  
CCGATAAC 0.616648319663  
CCGATAAG 0.339421250816  
CCGATACA -0.392246732318  
CCGATACC 1.27077274811  
CCGATACG 1.81518068424  
CCGATAGA 0.580721680968  
CCGATAGC 0.625801118935  
CCGATAGG -0.151928835578  
CCGATATA 2.31045018764  
CCGATATC 9.26809312507  
CCGATCAA 0.0800392261464  
CCGATCAC 1.38656976044  
CCGATCAG -0.306104507336  
CCGATCCA 1.33760802166  
CCGATCCC 1.22337407126  
CCGATCCG 0.0857804728556  
CCGATCGA 0.544444006792  
CCGATCGC 3.64398666821

CCGATCGG 0.0448434103879  
CCGATCTA 0.750947228116  
CCGATCTC 2.98703644335  
CCGATGAA 0.652357750253  
CCGATGAC -0.293068361724  
CCGATGAG -0.47002213248  
CCGATGCA 0.99460296781  
CCGATGCC 0.028963694416  
CCGATGCG 0.51610893511  
CCGATGGA -0.468867871361  
CCGATGGC -0.726420747637  
CCGATGTA 1.11301510299  
CCGATGTC -0.564749958675  
CCGATTAA 0.294352790876  
CCGATTAC 10.2575954925  
CCGATTAG 0.623158812403  
CCGATTCA 0.704710131069  
CCGATTCC 6.13564879414  
CCGATTCG 3.62870159536  
CCGATTGA 0.672025146902  
CCGATTGC 7.34088115312  
CCGATTTA 1.46209283541  
CCGATTTT 6.56127029666  
CCGCAAAA 0.0891123040326  
CCGCAAAC -0.0424123001834  
CCGCAAAG -0.408496303245  
CCGCAACA 0.530952273062  
CCGCAACC 0.408290595931  
CCGCAACG -0.281804906081  
CCGCAAGA -0.968482059608  
CCGCAAGC 0.246373846888  
CCGCAAGG -1.22010941515  
CCGCAATA 2.49431384221  
CCGCAATC 20.3124879906  
CCGCACAA 0.152720037662  
CCGCACAC 0.545292712828  
CCGCACAG -0.292421442279  
CCGCACCA -0.197359047644  
CCGCACCC -0.96257692664  
CCGCACCG -0.790005741068  
CCGCACGA 0.917162920233  
CCGCACGC -0.766494728082  
CCGCACGG -1.32450888308  
CCGCACTA -0.642124660853  
CCGCACTC -1.01930718777  
CCGAGAA -0.446259931782  
CCGAGAC -0.49818129435  
CCGAGAG -0.601884180333  
CCGAGCA -1.07514091004  
CCGAGCC -1.55902619949  
CCGAGCG -0.852345512586  
CCGAGGA -0.558346632388  
CCGAGGC -0.512783377091  
CCGAGTA -0.851412380296

CCGCAGTC -0.831954611686  
CCGCATAA -0.167941856163  
CCGCATAC 1.08875549312  
CCGCATAG -0.637298772486  
CCGCATCA 0.0136467330156  
CCGCATCC -0.410777380415  
CCGCATCG -1.00452814969  
CCGCATGA -0.694935504985  
CCGCATGC -0.674972224372  
CCGCATTA 0.567244845988  
CCGCATTC 0.209744353087  
CCGCCAAA 0.0266157035583  
CCGCCAAC -0.652481122365  
CCGCCAAG -0.783952666118  
CCGCCACA -0.187552533005  
CCGCCACC -1.09220416187  
CCGCCACG 0.0646281673722  
CCGCCAGA 0.884237203617  
CCGCCAGC -0.763188773683  
CCGCCAGG -1.29776170458  
CCGCCATA -0.2501312073  
CCGCCATC -0.592229789782  
CCGCCCAA 0.221602451856  
CCGCCCAC -0.979100686859  
CCGCCCAG -0.922127602226  
CCGCCCCA -0.893972099699  
CCGCCCCC -0.978419787807  
CCGCCCCG -0.997343553821  
CCGCCCGA -0.996402318702  
CCGCCCGC 0.460768178531  
CCGCCCGG -1.03440014515  
CCGCCCTA -0.0830715140168  
CCGCCCTC 0.0281387741057  
CCGCCGAA -0.331962465654  
CCGCCGAC -0.529301125533  
CCGCCGAG -0.997597355349  
CCGCCGCA -1.0974665575  
CCGCCGCC -0.196050832767  
CCGCCGCG -0.848617688295  
CCGCCGGA -0.604048158549  
CCGCCGGC -1.24875108744  
CCGCCGTA -0.185802583234  
CCGCCGTC -0.803361033607  
CCGCCTAA -0.503184922201  
CCGCCTAC 0.200462169926  
CCGCCTAG -0.0278909843548  
CCGCCTCA -0.0185533882956  
CCGCCTCC -1.42415512673  
CCGCCTCG -1.28487402372  
CCGCCTGA -0.742487351449  
CCGCCTGC -1.13369195535  
CCGCCTTA -0.138022812021  
CCGCCTTC -0.900903416805  
CCGCGAAA 0.859819980644

CCGCGAAC -0.883456718178  
CCGCGAAG -0.438761416617  
CCGCGACA -0.823908763464  
CCGCGACC -1.02973944995  
CCGCGACG -0.368804724072  
CCGCGAGA -0.120259318902  
CCGCGAGC -0.137786000297  
CCGCGAGG -1.65368868029  
CCGCGATA 2.57316979388  
CCGCGATC 6.29315054668  
CCGCGCAA 0.358838766661  
CCGCGCAC -0.300234399501  
CCGCGCAG -0.340941446166  
CCGCGCCA -0.587469769577  
CCGCGCCC -1.14278725067  
CCGCGCCG -0.416033764267  
CCGCGCGA -0.0143937616109  
CCGCGCGC -0.168843884043  
CCGCGCGG -0.222597008821  
CCGCGCTA -0.135498388587  
CCGCGCTC -1.32656700175  
CCGCGGAA 0.497156155739  
CCGCGGAC -0.486469307892  
CCGCGGAG -0.383344336612  
CCGCGGCA 0.242026809601  
CCGCGGCC -0.315870769209  
CCGCGGCG -1.33567092267  
CCGCGGGA -0.117211348136  
CCGCGGGC -0.743949520085  
CCGCGGTA -0.506343196  
CCGCGGTC -0.189969005841  
CCGCGTAA 0.778801619048  
CCGCGTAC -0.414900936439  
CCGCGTAG -0.181778874978  
CCGCGTCA -0.254523463603  
CCGCGTCC -0.881715916762  
CCGCGTCG 0.227028210982  
CCGCGTGA 0.195473440826  
CCGCGTGC -0.426872213438  
CCGCGTTA -0.319405693885  
CCGCGTTC -0.390110721933  
CCGCTAAA 0.106938005971  
CCGCTAAC 0.208325835178  
CCGCTAAG -0.530553927513  
CCGCTACA -0.401274068425  
CCGCTACC -1.42987494015  
CCGCTACG -0.64197645749  
CCGCTAGA -1.06578397174  
CCGCTAGC -0.0469106774138  
CCGCTAGG -0.661119784043  
CCGCTATA 0.232385749511  
CCGCTATC 0.168716591207  
CCGCTCAA 0.0671301119887  
CCGCTCAC -0.883646742596



CCGCTCAG 0.579427580697  
CCGCTCCA -0.685975343948  
CCGCTCCC -1.59969247063  
CCGCTCCG 0.433432368681  
CCGCTCGA 0.199540277045  
CCGCTCGC -0.691191213653  
CCGCTCTA -0.444404645228  
CCGCTCTC -1.31565745679  
CCGCTGAA 0.478045501885  
CCGCTGAC -1.15502121617  
CCGCTGAG -0.992001698187  
CCGCTGCA -1.00671539087  
CCGCTGCC -0.506857594976  
CCGCTGCG -1.00904011876  
CCGCTGGA -0.11398955861  
CCGCTGGC -1.32574626355  
CCGCTGTA -0.879666685067  
CCGCTGTC -0.204717200893  
CCGCTTAA 0.385525304632  
CCGCTTAC 0.0782937198626  
CCGCTTAG -0.230532815392  
CCGCTTCA -0.547617963487  
CCGCTTCC -0.971123581996  
CCGCTTCG -0.364047579064  
CCGCTTGA -0.700893175654  
CCGCTTGC -0.0346492668457  
CCGCTTTA -0.47376616243  
CCGCTTTC -0.166391079166  
CCGAAAA 0.680002251765  
CCGAAAC -1.02098212103  
CCGAAAG -0.511901736975  
CCGAAACA -0.365571695138  
CCGAAACC -0.891752185822  
CCGAAACG -0.586281528851  
CCGAAAGA -0.105609141948  
CCGAAAGC -1.19333087086  
CCGAAAGG -1.34002658555  
CCGGAATA 1.52627717683  
CCGGAATC 5.31545086517  
CCGGACAA -0.612164057038  
CCGGACAC -0.0410290687887  
CCGGACAG 0.269030142063  
CCGGACCA -1.03332377574  
CCGGACCC -1.04531727018  
CCGGACCG -0.344646530259  
CCGGACGA -1.07764102498  
CCGGACGC -0.915910379635  
CCGGACGG 0.314683312628  
CCGGACTA -1.13485771726  
CCGGACTC -0.657161682567  
CCGGAGAA 0.816207416182  
CCGGAGAC 0.227044939404  
CCGGAGAG -0.459430950296  
CCGGAGCA -1.02469373966

CCGGAGCC -0.683289909452  
CCGGAGCG -0.348260392176  
CCGGAGGA -0.846400649616  
CCGGAGGC -0.533731804931  
CCGGAGTA 0.0659209607355  
CCGGAGTC -0.976380749993  
CCGGATAA 1.64594812577  
CCGGATAC 3.25289864049  
CCGGATAG -0.00612992113928  
CCGGATCA -0.19776340497  
CCGGATCC 3.72718965717  
CCGGATCG 0.52709820146  
CCGGATGA 0.00522501806132  
CCGGATGC 0.787739039886  
CCGGATTA 2.34900449549  
CCGGATTC 10.3892873809  
CCGGCAAA 0.778122288285  
CCGGCAAC 0.362550385294  
CCGGCAAG -0.942893847096  
CCGGCACA -0.274118718932  
CCGGCACC -1.1913394045  
CCGGCACG -0.711244932298  
CCGGCAGA 0.086437324801  
CCGGCAGC -0.865475755573  
CCGGCAGG -1.0615982069  
CCGGCATA -0.402473809941  
CCGGCATC -0.45126643483  
CCGGCAA -0.994889703418  
CCGGCCAC -1.39768945621  
CCGGCCAG -0.40851355443  
CCGGCCCA -1.05732592474  
CCGGCCCC -1.2373357691  
CCGGCCCG -1.68695549988  
CCGGCCGA 1.44805873487  
CCGGCCGC 0.0653359887284  
CCGGCCGG -1.4840332064  
CCGGCCTA -1.21878656291  
CCGGCCTC -1.23122074671  
CCGGCGAA 0.140482674201  
CCGGCGAC -1.04328319861  
CCGGCGAG -0.370517296275  
CCGGCGCA -0.221908791084  
CCGGCGCC -0.292429022345  
CCGGCGCG -0.896514297081  
CCGGCGGA -0.711897340756  
CCGGCGGC -1.39705769689  
CCGGCGTA 0.0736662201248  
CCGGCGTC -0.82539550197  
CCGGCTAA -0.690414126175  
CCGGCTAC -1.04081941571  
CCGGCTAG 0.144409148504  
CCGGCTCA -0.782601061896  
CCGGCTCC -0.9488737352  
CCGGCTCG -1.05106766524

CCGGCTGA -0.827566014725  
CCGGCTGC -1.76889261778  
CCGGCTTA -1.03880677744  
CCGGCTTC -0.576328117757  
CCGGGAAA 0.434363409918  
CCGGGAAC -1.0257539034  
CCGGGAAG -0.935488906541  
CCGGGACA -0.833988683249  
CCGGGACC -0.338672653932  
CCGGGACG -1.52492635676  
CCGGGAGA -0.206916204242  
CCGGGAGC -1.10040579352  
CCGGGAGG -0.664284069618  
CCGGGATA 0.86018330106  
CCGGGATC 1.41873302695  
CCGGGCAA -0.129326385012  
CCGGGCAC -1.46814695588  
CCGGGCAG -1.5595756236  
CCGGGCCA -0.592226914585  
CCGGGCCC -1.30480175643  
CCGGGCCG -1.64066246718  
CCGGGCGA -0.549790044532  
CCGGGCGC -0.445993322556  
CCGGGCTA -1.72693355328  
CCGGGCTC -1.09082537396  
CCGGGGAA 1.11204825247  
CCGGGGAC -2.02903604704  
CCGGGGAG -1.0441964659  
CCGGGGCA -0.714279049839  
CCGGGGCC -1.42900898293  
CCGGGGCG -0.850493885375  
CCGGGGGA -0.675892548964  
CCGGGGGC -0.903532915639  
CCGGGGTA 0.678995671247  
CCGGGGTC -0.756298232105  
CCGGGTAA -0.326858728652  
CCGGGTAC -0.10100464379  
CCGGGTAG -0.771085634397  
CCGGGTCA -1.16081107986  
CCGGGTCC -0.874351751737  
CCGGGTCCG -0.753224907325  
CCGGGTGA 0.242539117525  
CCGGGTGC -0.713965391927  
CCGGGTTA -0.554077486816  
CCGGGTTC -0.881684550971  
CCGGTAAA 0.547473680847  
CCGGTAAC -0.907573613698  
CCGGTAAG -0.286178081528  
CCGGTACA -0.286395289633  
CCGGTACC -0.735382215583  
CCGGTACG -0.814192164093  
CCGGTAGA -0.293922556773  
CCGGTAGC -0.844714215572  
CCGGTAGG -1.05752588166

CCGGTATA -0.214253969726  
CCGGTATC 2.36583171974  
CCGGTCAA -0.213145450387  
CCGGTCAC -0.939127861091  
CCGGTCAG -0.805463587148  
CCGGTCCA -0.970521358804  
CCGGTCCC -0.814323377653  
CCGGTCCG 0.939252801493  
CCGGTCGA -1.0303678113  
CCGGTCGC -1.21215269805  
CCGGTCTA -0.948952672441  
CCGGTCTC -1.13206877565  
CCGGTGAA -0.397193901745  
CCGGTGAC -0.717301143827  
CCGGTGAG -0.702906859453  
CCGGTGCA -0.673775358054  
CCGGTGCC -0.916437847691  
CCGGTGCG -0.478488282305  
CCGGTGGA -0.586281528851  
CCGGTGGC -0.480609132557  
CCGGTGTA -0.418070449647  
CCGGTGTC -1.15013625557  
CCGGTTAA -0.151085357174  
CCGGTTAC -0.385028679603  
CCGGTTAG -0.276644187892  
CCGGTTCA -0.190786607466  
CCGGTTCC -0.879895393961  
CCGGTTCCG -0.62759602634  
CCGGTTGA -0.179853538158  
CCGGTTGC -0.300502054253  
CCGGTTTA 0.452528123784  
CCGGTTTC -0.345648928672  
CCGTAAAA 0.410667077382  
CCGTAAAC 4.07755286431E-5  
CCGTAAAG -0.406925661247  
CCGTAAACA 0.393606177987  
CCGTAAACC 0.155535640191  
CCGTAAACG -0.140777251257  
CCGTAAAGA 0.22219840189  
CCGTAAAGC 0.105916526702  
CCGTAAAGG -0.976351736636  
CCGTAAATA 2.0828887582  
CCGTAAATC 17.8755970707  
CCGTACAA 0.147740195536  
CCGTACAC -0.547796487115  
CCGTACAG 0.122406307314  
CCGTACCA -0.469463821395  
CCGTACCC -0.533860143294  
CCGTACCG 0.143171768039  
CCGTACGA 0.180673230836  
CCGTACGC -0.687014858547  
CCGTACGG 0.250345540207  
CCGTACTA -0.40253758705  
CCGTACTC 0.381084431352

CCGTAGAA 1.32611690265  
CCGTAGAC -1.44083362485  
CCGTAGAG -0.601527917221  
CCGTAGCA 0.168945822865  
CCGTAGCC -1.07427416867  
CCGTAGCG -1.18256142643  
CCGTAGGA -1.32719222653  
CCGTAGGC 0.752298048193  
CCGTAGTA -0.142774990779  
CCGTAGTC -0.901425134466  
CCGTATAA -0.0288648921735  
CCGTATAC 0.491889316622  
CCGTATAG -0.185802583234  
CCGTATCA 2.56050454875  
CCGTATCC 5.52004573947  
CCGTATCG 0.799693327082  
CCGTATGA 0.761685568137  
CCGTATGC -0.262532718402  
CCGTATTA 0.886891272321  
CCGTATTC 1.11348402157  
CCGTCAAA 0.209719521836  
CCGTCAAC -0.0119341608126  
CCGTCAAG -0.690151437673  
CCGTCACA -0.431643995816  
CCGTCACC -0.805833703485  
CCGTCACG 0.137935510569  
CCGTCAGA -0.270269090818  
CCGTCAGC -1.5158940544  
CCGTCAGG -0.128069139545  
CCGTCATA -0.0161774296074  
CCGTCATC -0.351227334648  
CCGTCCAA -1.24437660509  
CCGTCCAC -0.267937044237  
CCGTCCAG -0.485007139256  
CCGTCCCA -0.154815795282  
CCGTCCCC -1.30892557384  
CCGTCCCG -0.403751443172  
CCGTCCGA -0.579693928541  
CCGTCCGC -0.0335849209955  
CCGTCCTA -0.672213864412  
CCGTCCTC -1.83260542681  
CCGT CGAA 0.404439138145  
CCGT CGAC -1.03187363066  
CCGT CGAG -0.563810030463  
CCGT CGCA -0.0900956215887  
CCGT CGCC -1.37434442053  
CCGT CGCG -0.795417124206  
CCGT CGGA -0.689529872243  
CCGT CGGC 0.246969535541  
CCGT CGTA 0.458199320226  
CCGT CGTC -1.11873517779  
CCGTCTAA -0.790240200358  
CCGTCTAC -1.09661628317  
CCGTCTAG -1.48850387718

CCGTCTCA -0.573943272094  
CCGTCTCC -0.577880201661  
CCGTCTCG -1.18190274481  
CCGTCTGA -0.0590889686351  
CCGTCTGC -0.999103436093  
CCGTCTTA -0.699468907349  
CCGTCTTC -0.695597845944  
CCGTGAAA 0.216343454188  
CCGTGAAC -0.0602113411991  
CCGTGAAG -0.752651958871  
CCGTGACA -0.792162139218  
CCGTGACC -0.153890243058  
CCGTGACG -0.289006491755  
CCGTGAGA -0.392300576926  
CCGTGAGC -0.721287213134  
CCGTGAGG -0.954813631921  
CCGTGATA 0.922589724884  
CCGTGATC 2.76100932387  
CCGTGCAA 0.445292819884  
CCGTGCAC -0.608778119871  
CCGTGCAG -0.584563729016  
CCGTGCCA -0.680371583957  
CCGTGCCC -0.675299212746  
CCGTGCCG -1.14353715447  
CCGTGCGA -0.607722660995  
CCGTGCGC 0.140246908003  
CCGTGCTA -0.749481922901  
CCGTGCTC -0.132124997737  
CCGTGGAA 0.0996935537153  
CCGTGGAC -1.23404209963  
CCGTGGAG 0.0298722568362  
CCGTGGCA -1.21644092448  
CCGTGGCC -0.311950568065  
CCGTGGCG -0.165601968134  
CCGTGGGA -1.45011476249  
CCGTGGGC 0.34433992965  
CCGTGGTA 0.840543088097  
CCGTGGTC -0.0570130760166  
CCGTGTAA 0.170947744492  
CCGTGTAC 0.809056015774  
CCGTGTAG -1.06087705508  
CCGTGTCA -0.810730687646  
CCGTGTCC -1.23514669825  
CCGTGTCCG -1.20817473158  
CCGTGTGA -0.603680133265  
CCGTGTGC -0.852647146946  
CCGTGTTA 1.74114487054  
CCGTGTTC -0.975770423972  
CCGTTAAA 0.904802184659  
CCGTTAAC -0.366701647768  
CCGTTAAG 2.03244106506  
CCGTTACA 0.583187554924  
CCGTTACC -0.740327293957  
CCGTTACG -0.708595829844

CCGTTAGA 0.195260676208  
CCGTTAGC -0.54361046089  
CCGTTAGG -1.25911512902  
CCGTTATA 0.845419684494  
CCGTTATC 1.31236143489  
CCGTTCAA -0.278664667612  
CCGTTCAC -0.478036614911  
CCGTTCAG -0.624092728837  
CCGTTCCA -0.173764653929  
CCGTTCCC -0.821066500012  
CCGTTCCG -1.29439746209  
CCGTTCGA -0.693099299288  
CCGTTCGC -1.08962249586  
CCGTTCTA -1.00837411846  
CCGTTCTC 0.0624299481678  
CCGTTGAA -0.0897228914358  
CCGTTGAC -0.915787007522  
CCGTTGAG 0.324225047712  
CCGTTGCA 1.09502420788  
CCGTTGCC -0.87033614631  
CCGTTGCG -0.299289243658  
CCGTTGGA -0.232267866412  
CCGTTGGC -1.13369195535  
CCGTTGTA -0.376040812117  
CCGTTGTC -0.521418118044  
CCGTTTAA -0.181894928406  
CCGTTTAC -0.497624028792  
CCGTTTAG 0.417643613504  
CCGTTTCA -0.451701373803  
CCGTTTCC -0.427746796251  
CCGTTTCG 0.56653336529  
CCGTTTGA 0.724167115535  
CCGTTTGC -0.0397511741763  
CCGTTTTA -0.100524485802  
CCGTTTTC 0.35501423118  
CCTAAAAA 0.708595045699  
CCTAAAAC 0.642605602986  
CCTAAAAG -0.199284645846  
CCTAAACA 0.165264001733  
CCTAAACC -0.270582225967  
CCTAAACG 0.454376353034  
CCTAAAGA 1.23375797784  
CCTAAAGC -1.11554004918  
CCTAAAGG -0.596702290235  
CCTAAATA 1.63294230042  
CCTAAATC 0.732484800615  
CCTAACAA 0.618805240575  
CCTAACAC -0.609971065466  
CCTAACAG -0.82205661349  
CCTAACCA -0.654164158448  
CCTAACCC -1.06162878854  
CCTAACCG -0.816236690921  
CCTAACGA -0.0362729693068  
CCTAACGC 0.352289589445

CCTAACTA -0.411540614669  
CCTAACTC 0.573208267052  
CCTAAGAA 0.532031779045  
CCTAAGAC -0.538507246651  
CCTAAGAG 0.00841282798008  
CCTAAGCA -0.979309007989  
CCTAAGCC -0.503774860458  
CCTAAGCG -0.689338018153  
CCTAAGGA 0.455104562155  
CCTAAGGC -0.41443698411  
CCTAAGTA 0.132531446116  
CCTAAGTC -0.420050153839  
CCTAATAA 1.37636150229  
CCTAATAC 0.795562190991  
CCTAATAG -0.82848686208  
CCTAATCA -0.322614675713  
CCTAATCC 1.21119996214  
CCTAATCG 0.652601357899  
CCTAATGA 0.509517414076  
CCTAATGC -1.4406582378  
CCTAATTA 1.94368084203  
CCTAATTC 1.58271939545  
CCTACAAA -0.157620942547  
CCTACAAC 0.25333731393  
CCTACAAG -0.249186312838  
CCTACACA -0.644404431115  
CCTACACC -0.885353825786  
CCTACACG -1.2018621047  
CCTACAGA -0.25223689742  
CCTACAGC -0.754170063168  
CCTACAGG -0.879321661363  
CCTACATA -0.313698165401  
CCTACATC -0.667274797815  
CCTACCAA -0.647483244909  
CCTACCAC -0.87875707712  
CCTACCAG -0.282735947319  
CCTACCCA 0.0484206788815  
CCTACCCC -0.385629857269  
CCTACCCG -0.664921317944  
CCTACCGA -0.494298993536  
CCTACCGC -1.22142886944  
CCTACCTA -0.236677635282  
CCTACCTC -0.976987678054  
CCTACGAA -0.634543026342  
CCTACGAC -0.365508702174  
CCTACGAG 1.42182700087  
CCTACGCA 0.813577655966  
CCTACGCC -0.96419383318  
CCTACGCG -0.559115094274  
CCTACGGA -0.369208297253  
CCTACGGC -0.932142699377  
CCTACGTA -0.403986686606  
CCTACGTC -0.227963434325  
CCTACTAA -0.701118486588



CCTACTAC -0.456623189215  
CCTACTAG -0.507093361174  
CCTACTCA 0.979838567099  
CCTACTCC -0.670169598967  
CCTACTCG -0.189883795441  
CCTACTGA 0.249587533585  
CCTACTGC -0.602345518846  
CCTACTTA 1.12775467245  
CCTACTTC -0.663021596519  
CCTAGAAA 0.3503830721  
CCTAGAAC -0.258390342903  
CCTAGAAG -1.33915330964  
CCTAGACA -0.967697914827  
CCTAGACC -0.854219618614  
CCTAGACG -0.24308279124  
CCTAGAGA -0.0835835605592  
CCTAGAGC -0.72633266204  
CCTAGAGG 0.81959021677  
CCTAGATA 1.32765068984  
CCTAGATC 2.53932375267  
CCTAGCAA -0.0562610811711  
CCTAGCAC -0.35654435903  
CCTAGCAG -1.10285154109  
CCTAGCCA -1.05332103596  
CCTAGCCC -0.0824402774676  
CCTAGCCG -0.534247249434  
CCTAGCGA -0.169918946539  
CCTAGCGC -0.245879051531  
CCTAGCTA 0.436734140975  
CCTAGCTC -1.25058964558  
CCTAGGAA -0.208145481878  
CCTAGGAC 0.0442396189061  
CCTAGGAG -0.613360139212  
CCTAGGCA -0.698034183781  
CCTAGGCC -0.13194020095  
CCTAGGCG -0.917233493263  
CCTAGGGA -0.0690240830178  
CCTAGGGC -1.25411829709  
CCTAGGTA -0.26952336913  
CCTAGGTC -0.0807297963174  
CCTAGTAA -0.105684419847  
CCTAGTAC -0.839531018566  
CCTAGTAG -0.0577692529676  
CCTAGTCA 0.987880233215  
CCTAGTCC -0.872432688075  
CCTAGTCG -0.0216180874836  
CCTAGTGA -0.635871890365  
CCTAGTGC -0.229863678512  
CCTAGTTA -0.532371575117  
CCTAGTTC 0.0828503851884  
CCTATAAA 1.03062631769  
CCTATAAC 1.26171744417  
CCTATAAG 0.222568256846  
CCTATACA 0.18009662304

CCTATACC -0.342812938378  
CCTATACG -0.638178321549  
CCTATAGA 0.377307205939  
CCTATAGC -0.829244868702  
CCTATAGG -0.307604314922  
CCTATATA 0.670126993767  
CCTATATC 0.435455200836  
CCTATCAA -0.0202440044447  
CCTATCAC 0.421201801141  
CCTATCAG 0.846139790785  
CCTATCCA -0.795229974985  
CCTATCCC -0.471415034993  
CCTATCCG -0.30400116965  
CCTATCGA 0.676445632417  
CCTATCGC -0.108988283193  
CCTATCTA 1.59527198511  
CCTATCTC 1.26575657394  
CCTATGAA 0.309839650313  
CCTATGAC -0.010604251263  
CCTATGAG -1.0424086158  
CCTATGCA -0.364051238406  
CCTATGCC -0.600618832037  
CCTATGCG -0.355908940376  
CCTATGGA -0.632105904361  
CCTATGGC -0.616001138836  
CCTATGTA 0.431409275145  
CCTATGTC 0.201004798115  
CCTATTAA -0.484890301683  
CCTATTAC 0.252421955589  
CCTATTAG -0.981733845036  
CCTATTCA 0.562113141156  
CCTATTCC 0.365648279945  
CCTATTCCG 0.650817689902  
CCTATTGA -0.221535015405  
CCTATTGC -0.225097646529  
CCTATTTA -0.236259163351  
CCTATTTTC 1.6307513999  
CCTCAAAA 1.41213288032  
CCTCAAAC -0.215091959116  
CCTCAAAG 0.0808617940223  
CCTCAACA 0.318698918055  
CCTCAACC -0.222579496254  
CCTCAACG -0.658646068638  
CCTCAAGA -0.0552748884174  
CCTCAAGC -1.26504352495  
CCTCAAGG -0.421871722166  
CCTCAATA -0.443480399912  
CCTCAATC 0.377566757862  
CCTCACAA 0.676467327089  
CCTCACAC -0.237510135659  
CCTCACAG 0.293022881327  
CCTCACCA -0.454958188462  
CCTCACCC -0.288852799378  
CCTCACCG -0.175511467121

CCTCACGA 0.0776188325872  
CCTCACGC -1.00994345355  
CCTCACTA -0.417865526477  
CCTCACTC -0.635446883893  
CCTCAGAA -0.00986741654992  
CCTCAGAC -1.46326800705  
CCTCAGAG -1.35238836665  
CCTCAGCA -0.279951710581  
CCTCAGCC -1.12504754328  
CCTCAGCG -0.27140766904  
CCTCAGGA -0.286555255168  
CCTCAGGC -0.781297813269  
CCTCAGTA 0.0396437463412  
CCTCAGTC -0.536180427702  
CCTCATAA -0.322183134701  
CCTCATAC -0.0672780539708  
CCTCATAG 0.299091377791  
CCTCATCA -0.0833227017285  
CCTCATCC -0.866872317429  
CCTCATCG 0.0448818334822  
CCTCATGA -0.872432688075  
CCTCATGC -0.513688802932  
CCTCATT 1.02606991375  
CCTCATTC -1.26358083355  
CCTCCAAA -0.63029374577  
CCTCCAAC -0.553985219113  
CCTCCAAG -0.692041226597  
CCTCCACA -1.1306594061  
CCTCCACC -1.47815630264  
CCTCCACG -0.967071644528  
CCTCCAGA -0.531279784199  
CCTCCAGC -0.900905507857  
CCTCCAGG -1.19621809195  
CCTCCATA -0.965039925399  
CCTCCATC -0.751685631119  
CCTCCCAA -0.22060763351  
CCTCCCAC -0.772359085522  
CCTCCCAG -1.2192651526  
CCTCCCCA -1.19456250093  
CCTCCCCC -1.30927216583  
CCTCCCCG -0.318205429606  
CCTCCCGA -0.141319879446  
CCTCCCGC -0.648681679517  
CCTCCCTA -0.645455446504  
CCTCCCTC -0.332696163788  
CCTCCGAA -0.636710402518  
CCTCCGAC -1.17610268725  
CCTCCGAG -1.09872537125  
CCTCCGCA -0.517221375173  
CCTCCGCC -1.19611380069  
CCTCCGCG -0.198015899589  
CCTCCGGA 1.29992751247  
CCTCCGGC -1.28972369781  
CCTCCGTA -0.683505287886

CCTCCGTC -1.287278473  
CCTCCTAA -1.56827178923  
CCTCCTAC -1.08775962924  
CCTCCTAG -0.197050355982  
CCTCCTCA -1.46900115093  
CCTCCTCC -1.79727682921  
CCTCCTCG -0.528461306472  
CCTCCTGA -0.724961192817  
CCTCCTGC -2.03535337878  
CCTCCTTA -0.0653989816925  
CCTCCTTC -0.896775417293  
CCTCGAAA -0.827547979395  
CCTCGAAC 0.513793616951  
CCTCGAAG 0.257738979971  
CCTCGACA -1.05722189487  
CCTCGACC -0.961026933788  
CCTCGACG -0.89132717935  
CCTCGAGA 0.37004419559  
CCTCGAGC -0.631573731435  
CCTCGAGG -0.825905196078  
CCTCGATA 0.291220393855  
CCTCGATC -0.371814794507  
CCTCGCAA 0.667421171507  
CCTCGCAC -0.361785582751  
CCTCGCAG -0.646725499668  
CCTCGCCA -1.23665669971  
CCTCGCCC -1.14936387296  
CCTCGCCG -1.3843762461  
CCTCGCGA -0.592796726459  
CCTCGCGC -0.990930033653  
CCTCGCTA -0.432928163587  
CCTCGCTC -0.230668733821  
CCTCGGAA -0.251178563347  
CCTCGGAC -0.153523001919  
CCTCGGAG -0.923218608999  
CCTCGGCA -0.413865342565  
CCTCGGCC -1.16768619992  
CCTCGGCG -1.12934622497  
CCTCGGGA -0.0376995900461  
CCTCGGGC -0.193379251496  
CCTCGGTA 0.224554234196  
CCTCGGTC -1.28487402372  
CCTCGTAA 2.03574597393  
CCTCGTAC -0.367128222529  
CCTCGTAG -0.593876493824  
CCTCGTCA -0.776918103282  
CCTCGTCC -1.51052579922  
CCTCGTCG -1.61067781626  
CCTCGTGA -0.249473048447  
CCTCGTGC -1.342928444  
CCTCGTTA -0.892295075392  
CCTCGTTC -0.91037327195  
CCTCTAAA 0.435433506164  
CCTCTAAC -0.781787642376

CCTCTAAG 0.13111528064  
CCTCTACA -0.376266645814  
CCTCTACC -0.241344080878  
CCTCTACG -0.692599799063  
CCTCTAGA -0.317496562723  
CCTCTAGC -0.604433173637  
CCTCTATA 0.522219252629  
CCTCTATC -0.814359971077  
CCTCTCAA -0.663435624964  
CCTCTCAC -0.157691515578  
CCTCTCAG -1.57432277313  
CCTCTCCA -0.734812142327  
CCTCTCCC -1.49024023511  
CCTCTCCG -1.11604033356  
CCTCTCGA -0.0497105970473  
CCTCTCGC -0.32950025104  
CCTCTCTA -0.910602503608  
CCTCTCTC -0.868568161209  
CCTCTGAA -0.894058094243  
CCTCTGAC -0.700296180094  
CCTCTGAG 1.00477646221  
CCTCTGCA -0.182465785807  
CCTCTGCC -0.38644014021  
CCTCTGCG -0.699292474773  
CCTCTGGA -0.702570461342  
CCTCTGGC -1.3048490665  
CCTCTGTA -0.546897595814  
CCTCTGTC -0.775494619122  
CCTCTTAA -0.534208564958  
CCTCTTAC -0.404866497051  
CCTCTTAG -0.838589522065  
CCTCTTCA -0.253573080128  
CCTCTTCC -0.451789198018  
CCTCTTCG -0.471351519266  
CCTCTTGA -0.214400866182  
CCTCTTGC -0.473358145762  
CCTCTTTA 1.37342801666  
CCTCTTTC -0.554220985311  
CCTGAAAA 0.457416220971  
CCTGAAAC -0.231331336161  
CCTGAAAG -0.559547419431  
CCTGAACA -0.537996507017  
CCTGAACC -0.947728622437  
CCTGAACG 0.0897077313034  
CCTGAAGA -0.068531640095  
CCTGAAGC -1.14841087567  
CCTGAAGG -1.36940378564  
CCTGAATA 1.51147252336  
CCTGAATC 1.11895264727  
CCTGACAA -0.832771690548  
CCTGACAC -1.05748327646  
CCTGACAG 0.236512703497  
CCTGACCA -1.43520241979  
CCTGACCC -0.449642732369

CCTGACCG -0.851886003744  
CCTGACGA 0.0998801801733  
CCTGACGC -0.847866477594  
CCTGACTA -0.205181153222  
CCTGACTC -0.0616418826623  
CCTGAGAA 0.166201054747  
CCTGAGAC -0.550654172081  
CCTGAGAG -0.835864096185  
CCTGAGCA -0.275034077274  
CCTGAGCC -0.998948698189  
CCTGAGCG -0.922467398298  
CCTGAGGA -0.874924700191  
CCTGAGGC -0.746548698654  
CCTGAGTA -0.0476381023895  
CCTGAGTC -0.854742643184  
CCTGATAA 0.997447322314  
CCTGATAC 1.73979509599  
CCTGATAG 0.170990611073  
CCTGATCA 1.23025572586  
CCTGATCC 0.218781098932  
CCTGATCG 0.706625274008  
CCTGATGA -0.458038831927  
CCTGATGC -0.651800484695  
CCTGATTA 0.468947331366  
CCTGATTC 5.13185538811  
CCTGCAAA 0.150702171758  
CCTGCAAC -0.771332378621  
CCTGCAAG -0.663295001667  
CCTGCACA -0.00202152524694  
CCTGCACC -1.37862951038  
CCTGCACG -0.0807297963174  
CCTGCAGA -0.106478497129  
CCTGCAGC -1.11414322595  
CCTGCAGG -0.158383131275  
CCTGCATA 1.5888022679  
CCTGCATC 0.519196113115  
CCTGCCAA -0.0966087281445  
CCTGCCAC -0.879004344108  
CCTGCCAG -0.856607600856  
CCTGCCCA -1.03283786736  
CCTGCCCC -0.69802268299  
CCTGCCCG -1.89387170413  
CCTGCCGA -0.640451818653  
CCTGCCGC -0.997232466644  
CCTGCCTA -0.570424291696  
CCTGCCTC -0.458836568552  
CCTGCGAA -0.046117645658  
CCTGCGAC -1.53132445541  
CCTGCGAG -0.692248763582  
CCTGCGCA 0.375259281151  
CCTGCGCC -1.16008992804  
CCTGCGCG -0.376012844286  
CCTGCGGA 0.78365625939  
CCTGCGGC -0.724626885759

CCTGCGTA -0.568027945243  
CCTGCGTC -1.22547061302  
CCTGCTAA -0.52560911052  
CCTGCTAC -0.397929952313  
CCTGCTAG -1.06237189641  
CCTGCTCA -1.08203249714  
CCTGCTCC -1.32418424714  
CCTGCTCG -1.10562898191  
CCTGCTGA 0.0826849306395  
CCTGCTGC -1.01370917818  
CCTGCTTA -0.386744388385  
CCTGCTTC -1.22516270551  
CCTGGAAA 1.14645678687  
CCTGGAAC -0.491718895823  
CCTGGAAG -0.0398842174076  
CCTGGACA -1.0100336302  
CCTGGACC -0.321655143882  
CCTGGACG -0.585091719836  
CCTGGAGA 0.0471035770301  
CCTGGAGC -1.29037715179  
CCTGGATA 2.16874581586  
CCTGGATC 2.24041194403  
CCTGGCAA -1.28816272693  
CCTGGCAC -1.32016393685  
CCTGGCAG -1.03514377578  
CCTGGCCA -0.54845647564  
CCTGGCCC 0.306330079652  
CCTGGCCG -0.175257665593  
CCTGGCGA -0.166736887015  
CCTGGCGC -0.782817224474  
CCTGGCTA -0.829614462276  
CCTGGCTC -0.461413791067  
CCTGGGAA -0.545724515221  
CCTGGGAC -1.48089871832  
CCTGGGAG -0.411991497918  
CCTGGGCA -1.68014572522  
CCTGGGCC -0.973882203338  
CCTGGGCG -1.08573470604  
CCTGGGGA -0.308634158402  
CCTGGGGC -1.36860709455  
CCTGGGTA -0.810096837281  
CCTGGGTC -1.19358807035  
CCTGGTAA -0.549113588967  
CCTGGTAC -0.712132061427  
CCTGGTAG -0.897592234774  
CCTGGTCA -0.231053487527  
CCTGGTCC -1.35832983166  
CCTGGTCG -1.15362596123  
CCTGGTGA -0.0473236603321  
CCTGGTGC -0.280008430387  
CCTGGTTA -0.657787430102  
CCTGGTTC -1.42356388156  
CCTGTAAA 0.498167179744  
CCTGTAAC 0.367901389284

CCTGTAAG -1.0815246327  
CCTGTACA 0.0667903159166  
CCTGTACC -0.788584870724  
CCTGTACG -0.151105222175  
CCTGTAGA -0.41619817329  
CCTGTAGC -1.44189535689  
CCTGTATA 1.23035923297  
CCTGTATC 1.02997312509  
CCTGTCAA 0.024243665594  
CCTGTCAC -0.286342229169  
CCTGTCAG -0.345254242465  
CCTGTCCA -1.48086290904  
CCTGTCCC -0.474464051286  
CCTGTCCG -0.571430349451  
CCTGTCGA -0.366174963856  
CCTGTCGC -0.543578572335  
CCTGTCTA 0.411013669376  
CCTGTCTC -1.39113348307  
CCTGTGAA -0.252546111846  
CCTGTGAC -0.426188439189  
CCTGTGAG -1.07296203307  
CCTGTGCA 0.311626977651  
CCTGTGCC -1.55165576131  
CCTGTGCG -0.388879091862  
CCTGTGGA -0.580283866798  
CCTGTGGC -1.68837088122  
CCTGTGTA 0.417492273561  
CCTGTGTC -0.161277148282  
CCTGTTAA 1.04410472096  
CCTGTTAC -0.367397445571  
CCTGTTAG 0.701013411187  
CCTGTTCA -0.221015650178  
CCTGTTCC -0.455373262433  
CCTGTTCG -0.0297844326207  
CCTGTTGA 0.343732478826  
CCTGTTGC -0.901987627656  
CCTGTTTA -0.114970785113  
CCTGTTTC -0.255164632653  
CCTTAAAA -0.149733230189  
CCTTAAAC 0.325991464524  
CCTTAAAG 0.687944331494  
CCTTAAACA -0.696857705227  
CCTTAAACC 0.0595359311606  
CCTTAAACG 0.167969562611  
CCTTAAAGA -0.466701540711  
CCTTAAAGC -1.28877958749  
CCTTAAAGG 0.636900426937  
CCTTAAATA 0.577764409615  
CCTTAAATC 0.109986238118  
CCTTACAA 0.201007150549  
CCTTACAC 0.188598843526  
CCTTACAG 0.558217771263  
CCTTACCA -0.445210484682  
CCTTACCC -0.0151993396831



CCTTACCG 0.0695180942302  
CCTTACGA 0.672457472058  
CCTTACGC -0.791988059076  
CCTTACTA -0.170832736591  
CCTTACTC -0.936523193508  
CCTTAGAA 1.13001797567  
CCTTAGAC -0.695254651911  
CCTTAGAG -0.436676375643  
CCTTAGCA -0.276037782594  
CCTTAGCC -1.19307367137  
CCTTAGCG -0.103638586111  
CCTTAGGA 0.177581609344  
CCTTAGGC -0.487022914108  
CCTTAGTA 0.256272106466  
CCTTAGTC 0.0477486668037  
CCTTATAA 0.291748384675  
CCTTATAC -0.31894906024  
CCTTATAG 0.232964709741  
CCTTATCA 0.621537462376  
CCTTATCC -0.545042570642  
CCTTATCG -0.270511652937  
CCTTATGA -0.848975781078  
CCTTATGC 0.219150431124  
CCTTATTA 1.26107575236  
CCTTATTC 1.73850491644  
CCTTCAAA 0.339057407638  
CCTTCAAC -0.539238069587  
CCTTCAAG -0.710580761668  
CCTTCACA -0.941940327041  
CCTTCACC -1.56504058997  
CCTTCACG 0.0217427665039  
CCTTCAGA -0.493222362751  
CCTTCAGC -0.819164164772  
CCTTCATA -0.282786655348  
CCTTCATC 0.183871496019  
CCTTCCAA -0.482459714242  
CCTTCCAC -0.209492903994  
CCTTCCAG 0.190769356281  
CCTTCCCA -1.73515322027  
CCTTCCCC -0.427443070839  
CCTTCCCG -0.564803541902  
CCTTCCGA -0.715155200942  
CCTTCCGC -0.398311308059  
CCTTCCTA -0.162328425053  
CCTTCCTC -1.23281099232  
CCTTCGAA -0.691660393614  
CCTTCGAC -1.39904550392  
CCTTCGAG -0.250158913749  
CCTTCGCA 0.551633830295  
CCTTCGCC -0.700296180094  
CCTTCGCG -1.18550719699  
CCTTCGGA -0.665462900606  
CCTTCGGC -1.56328462842  
CCTTCGTA -1.02147926882

CCTTCGTC -1.20858065719  
CCTTCTAA -0.467530904509  
CCTTCTAC -0.0868103163354  
CCTTCTAG -0.253909216858  
CCTTCTCA -0.206972924048  
CCTTCTCC -1.16897115184  
CCTTCTCG -0.587032216788  
CCTTCTGA -0.38785369187  
CCTTCTGC -0.552782079637  
CCTTCTTA -0.263778985842  
CCTTCTTC -1.04613016693  
CCTTGAAA 1.39298171232  
CCTTGAAC -1.22709248581  
CCTTGAAG -0.603272900742  
CCTTGACA -0.203905872425  
CCTTGACC -0.270952080922  
CCTTGACG -0.684277409114  
CCTTGAGA 0.0218865263805  
CCTTGAGC -1.446889575  
CCTTGATA 0.409236013156  
CCTTGATC 1.48236820564  
CCTTGCAA -0.115611170018  
CCTTGCAC -0.46946957179  
CCTTG CAG -1.323138198  
CCTTGCCA -0.977542591178  
CCTTGCCC -0.724961192817  
CCTTGCCG -0.850254982599  
CCTTGCGA 0.302495873051  
CCTTGCGC 0.166743944318  
CCTTGCTA -0.0901123500107  
CCTTGCTC -1.10779871052  
CCTTGCAA 0.188595968328  
CCTTG GAC -0.716074741389  
CCTTG GAG -0.670031850867  
CCTTG GCA -0.895145180292  
CCTTG GCC -1.57527211108  
CCTTG GCG -0.483107417832  
CCTTG GGA -0.435644963873  
CCTTG GGC -1.53042608687  
CCTTG GTA -0.159233666981  
CCTTG GTC -1.27065591054  
CCTTG TAA 0.612768894047  
CCTTG TAC -0.20301456119  
CCTTG TAG -0.411292563536  
CCTTG TCA -0.758522328088  
CCTTG TCC -0.768345309767  
CCTTG TCG -0.933914605202  
CCTTG TGA -0.34576184552  
CCTTG TGC -1.17621560409  
CCTTG TTA 0.0958256288893  
CCTTG TTC 0.0406265411341  
CCTTTAAA 0.264377026929  
CCTTTAAC 0.42625430735  
CCTTTAAG -0.682647172113

CCTTTACA 1.4840956766  
CCTTTACC -0.108873275292  
CCTTTACG -0.367151485491  
CCTTTAGA -0.701172331197  
CCTTTAGC -0.42569991699  
CCTTTATA 0.14215682331  
CCTTTATC 0.143856326433  
CCTTTCAA -0.101037839253  
CCTTTCAC -0.908454208288  
CCTTTCAG -0.479190614648  
CCTTTCCA -0.909923695609  
CCTTTCCC -0.33732601596  
CCTTTCCG -1.22987044939  
CCTTTCGA -0.888592343734  
CCTTTCGC -0.630663862107  
CCTTTCTA -0.448103194781  
CCTTTCTC -0.453810723265  
CCTTTGAA -0.295049634205  
CCTTTGAC 0.00557056452841  
CCTTTGAG -0.117982423838  
CCTTTGCA 0.152345216457  
CCTTTGCC -1.15408677698  
CCTTTGCG -0.428276093979  
CCTTTGGA -0.714019759298  
CCTTTGGC -1.65136395239  
CCTTTGTA 0.262796713812  
CCTTTGTC 0.0301762436299  
CCTTTTAA 1.38102507269  
CCTTTTAC -0.90169644856  
CCTTTTAG -0.607879489952  
CCTTTTCA 0.00565342249367  
CCTTTTCC -0.225929624143  
CCTTTTCG -0.0159531641998  
CCTTTTGA 0.236807541934  
CCTTTTGC 0.0229380645326  
CCTTTTTA 0.438452986336  
CCTTTTTC -0.677825988614  
CGAAAAAA 0.198833762596  
CGAAAAAC 0.293070452777  
CGAAAAAG 0.878494911381  
CGAAAACA 1.75187772155  
CGAAAACC 0.616293363458  
CGAAAACG -0.32154823881  
CGAAAAGA 1.15646404257  
CGAAAAGC 0.450373032543  
CGAAAATA 3.04473799848  
CGAAAATC 8.95907055362  
CGAAACAA 0.666614547909  
CGAAACAC 0.100848337597  
CGAAACAG -0.514116684601  
CGAAACCA -0.992743760532  
CGAAACCC -0.206990697996  
CGAAACCG -0.895145180292  
CGAAACGA 0.841171188067

CGAAACGC -1.00460813246  
CGAAACTA -0.265380732249  
CGAAACTC -0.322615721239  
CGAAAGAA 0.860312423567  
CGAAAGAC -0.0912556331022  
CGAAAGAG -1.08744727824  
CGAAAGCA -0.586062491075  
CGAAAGCC -1.06377708386  
CGAAAGCG -0.165302686209  
CGAAAGGA -1.23376451238  
CGAAAGGC -0.306099279704  
CGAAAGTA 1.09001927312  
CGAAAGTC -0.768945703288  
CGAAATAA 2.30375777331  
CGAAATAC 1.16839245299  
CGAAATAG -0.00835872199015  
CGAAATCA 11.0434484028  
CGAAATCC 22.4198525212  
CGAAATCG 14.0519633558  
CGAAATGA -0.123717136007  
CGAAATGC 0.154127054782  
CGAAATTA 1.59307637972  
CGAAATTC 4.85729963916  
CGAACAAA 1.01331736717  
CGAACAAC -0.294846279325  
CGAACAAAG -0.410845078247  
CGAACACA -0.0366305393272  
CGAACACC 0.868435640741  
CGAACACG -0.802925571872  
CGAACAGA 1.25327429593  
CGAACAGC -0.0246634444337  
CGAACATA 1.630111015  
CGAACATC 0.277764469403  
CGAACCAA -0.4051696997  
CGAACCCAC -0.0913722092931  
CGAACCCAG 0.00728784160009  
CGAACCCA -0.323033670408  
CGAACCCC -0.677704968936  
CGAACCCG -0.277942208887  
CGAACCGA 0.624637709461  
CGAACCGC -0.407148619747  
CGAACCTA -0.37742378213  
CGAACCTC -1.41496207469  
CGAACGAA 0.796862303039  
CGAACGAC -1.04588655929  
CGAACGAG -0.489954047301  
CGAACGCA -0.158417895027  
CGAACGCC -1.66296615858  
CGAACGCG 0.426721134877  
CGAACGGA -1.35065749773  
CGAACGGC -0.616192470163  
CGAACGTA 0.469559487059  
CGAACGTC -0.559938446295  
CGAACTAA 0.470989244377

CGAACTAC -0.0768652694521  
CGAACTAG 0.458882571712  
CGAACTCA -0.900905507857  
CGAACTCC -0.13975603337  
CGAACTCG -0.847011759782  
CGAACTGA -0.535028257637  
CGAACTGC -0.857375017216  
CGAACTTA 0.570414620577  
CGAACTTC -0.670056420737  
CGAAGAAA 1.1587286527  
CGAAGAAC -0.722868049014  
CGAAGAAG -0.291430544657  
CGAAGACA 0.382961935341  
CGAAGACC -0.54807276746  
CGAAGACG -0.570451214  
CGAAGAGA 0.0288643694103  
CGAAGAGC -0.642324356391  
CGAAGATA 2.51477008851  
CGAAGATC 3.72051031192  
CGAAGCAA 0.75007055425  
CGAAGCAC -0.19236482953  
CGAAGCAG -1.04640827695  
CGAAGCCA -0.637395222294  
CGAAGCCC -1.60001867486  
CGAAGCCG -0.0453230456127  
CGAAGCGA -1.35687968657  
CGAAGCGC -0.1590005146  
CGAAGCTA -0.622170789978  
CGAAGCTC -0.91923201693  
CGAAGGAA 0.00707141764037  
CGAAGGAC -0.892229729994  
CGAAGGAG -0.861975594649  
CGAAGGCA -1.39552835319  
CGAAGGCC -1.60390097567  
CGAAGGCG -0.0770006651177  
CGAAGGGA -0.91566363541  
CGAAGGGC -1.05803818959  
CGAAGGTA -0.456086834184  
CGAAGGTC -1.01184814123  
CGAAGTAA 0.833357708082  
CGAAGTAC -0.0835976751652  
CGAAGTAG 0.222435474996  
CGAAGTCA 0.317869815639  
CGAAGTCC -0.170122301419  
CGAAGTCG -0.754170063168  
CGAAGTGA 0.211251217976  
CGAAGTGC -0.619360415081  
CGAAGTTA -0.658347570858  
CGAAGTTC -0.146168508012  
CGAATAAA 0.104731422555  
CGAATAAC 0.371690376868  
CGAATAAG 0.157127976861  
CGAATACA 2.55944177119  
CGAATACC 1.35311526886

CGAATACG 0.627294914744  
CGAATAGA 0.953991586808  
CGAATAGC -0.142748591238  
CGAATATA 2.05668473065  
CGAATATC 9.48407299746  
CGAATCAA 1.95075225967  
CGAATCAC 2.88861790905  
CGAATCAG 4.59852245149  
CGAATCCA 6.7704926707  
CGAATCCC 6.59468375133  
CGAATCCG 8.40235363547  
CGAATCGA 3.37837905673  
CGAATCGC 4.00833666577  
CGAATCTA 8.80949755034  
CGAATCTC 15.5954823081  
CGAATGAA 0.227651867465  
CGAATGAC 0.703564756925  
CGAATGAG 1.05021948197  
CGAATGCA 0.427845859876  
CGAATGCC -0.824152632491  
CGAATGCG -0.202241917199  
CGAATGGA 0.225177106534  
CGAATGGC -1.18739959973  
CGAATGTA -0.0556930989676  
CGAATGTC -0.169089059978  
CGAATTAA 0.508717325017  
CGAATTAC 2.22005606827  
CGAATTAG 0.871701080994  
CGAATTCA 0.684121887066  
CGAATTCC 1.42461332866  
CGAATTCCG 2.67046203489  
CGAATTGA 0.171568787159  
CGAATTGC 1.28246565371  
CGAATTTA 2.47003149214  
CGAATTTTC 2.54015782134  
CGACAAAA 0.576906293842  
CGACAAAC -0.482773894918  
CGACAAAG -1.32162636687  
CGACAACA -0.289536573628  
CGACAACC 0.474513452407  
CGACAACG -0.241344080878  
CGACAAGA -0.761928130256  
CGACAAGC -0.622696689745  
CGACAATA 1.56841633325  
CGACAATC 3.67747017314  
CGACACAA 1.07786293796  
CGACACAC -0.152978282677  
CGACACAG -0.838184380594  
CGACACCA -0.0622331278276  
CGACACCC -0.589274348101  
CGACACCG -1.38489012232  
CGACACGA -0.0774201825759  
CGACACGC -0.463409439537  
CGACACTA 0.213781914568

CGACACTC 0.140182608131  
CGACAGAA -0.0612589586273  
CGACAGAC -0.381730566652  
CGACAGAG -0.617097896004  
CGACAGCA -0.650300677109  
CGACAGCC -0.881764533739  
CGACAGCG 0.555091908782  
CGACAGGA 0.821631084255  
CGACAGGC -1.23671551057  
CGACAGTA 1.35926427086  
CGACAGTC -0.864630970261  
CGACATAA 1.97106291643  
CGACATAC -0.141184222399  
CGACATAG 0.172725662093  
CGACATCA -0.163231237078  
CGACATCC 0.999999452196  
CGACATCG 0.051252748451  
CGACATGA 0.910677781507  
CGACATGC -0.450980483367  
CGACATTA 0.262534286692  
CGACATTC -0.0202633466826  
CGACCAAA 0.261418971431  
CGACCAAC -1.10051949451  
CGACCAAG -0.64687500994  
CGACCACA -0.134817489535  
CGACCACC -1.45013697992  
CGACCACG -0.381783888497  
CGACCAGA 0.242888846097  
CGACCAGC -1.29160041765  
CGACCATA 1.25786598639  
CGACCATC 0.138930590296  
CGACCCAA -0.203136103631  
CGACCCAC 0.00584867454428  
CGACCCAG -1.18961297907  
CGACCCCA -1.2369962344  
CGACCCCC -0.717672044309  
CGACCCCG -0.629492088422  
CGACCCGA -0.430587752795  
CGACCCGC -0.796846881525  
CGACCCTA -0.472406455379  
CGACCCTC -1.00895229455  
CGACCGAA -0.953418638354  
CGACCGAC -0.603584990365  
CGACCGAG -1.46361564457  
CGACCGCA -1.16913948159  
CGACCGCC -0.884459900735  
CGACCGCG 0.0922015730904  
CGACCGGA 0.306632236774  
CGACCGGC -0.63398523802  
CGACCGTA -0.0929070420123  
CGACCGTC -0.251530644354  
CGACCTAA 0.133418575245  
CGACCTAC -0.59251809368  
CGACCTAG 0.239443313927

CGACCTCA -0.62904904662  
CGACCTCC -1.22551949138  
CGACCTCG -1.11559467794  
CGACCTGA 0.0320662939351  
CGACCTGC -0.48106053857  
CGACCTTA -0.418628760731  
CGACCTTC -0.21997456729  
CGACGAAA -0.00863029746617  
CGACGAAC -0.342373033156  
CGACGAAG -0.474679952482  
CGACGACA -0.427558601504  
CGACGACC -1.40905563482  
CGACGACG -0.338275353909  
CGACGAGA -0.0110828409614  
CGACGAGC -0.838589522065  
CGACGATA 1.32703278375  
CGACGATC 1.62307383834  
CGACGCAA 0.508355311509  
CGACGCAC -1.16758922735  
CGACGCAG -0.475614653062  
CGACGCCA -1.30816913551  
CGACGCCC -0.524169943464  
CGACGCCG -1.28559020928  
CGACGCGA -0.238516977558  
CGACGCGC -0.630865387316  
CGACGCTA -0.340963924983  
CGACGCTC -0.721287213134  
CGACGGAA 0.883897668926  
CGACGGAC -0.88774389908  
CGACGGAG -0.306919495146  
CGACGGCA -0.706619523613  
CGACGGCC -0.0464752156784  
CGACGGCG 0.212161348686  
CGACGGGA -1.18981737948  
CGACGGGC -1.44954024574  
CGACGGTA -0.21046628905  
CGACGGTC -0.821274821142  
CGACGTAA 1.94943933993  
CGACGTAC -0.367593743148  
CGACGTAG -0.958496498578  
CGACGTCA -0.0897354377523  
CGACGTCC -0.766545436111  
CGACGTCT 2.33639649293  
CGACGTGA -0.77639795391  
CGACGTGC -0.718827873717  
CGACGTTA 1.26257451442  
CGACGTTC 0.642242282571  
CGACTAAA -0.0443841629275  
CGACTAAC -0.24469316324  
CGACTAAG -0.510117284833  
CGACTACA 0.273100114861  
CGACTACC -0.0111479249783  
CGACTACG -0.474988382763  
CGACTAGA -0.293253419892



CGACTAGC -1.35041179903  
CGACTATA 0.154358900256  
CGACTATC 0.0866615902085  
CGACTCAA 0.576906293842  
CGACTCAC -0.392110029744  
CGACTCAG 0.0202126386534  
CGACTCCA -0.6702472293  
CGACTCCC -0.752839369474  
CGACTCCG -0.89394439325  
CGACTCGA -1.1461922687  
CGACTCGC -0.575352118885  
CGACTCTA -0.854972920368  
CGACTCTC -0.569911983772  
CGACTGAA -0.275628459018  
CGACTGAC -0.523678284686  
CGACTGAG 0.294400100945  
CGACTGCA -0.696885411676  
CGACTGCC -1.52381443946  
CGACTGCG 0.390344135696  
CGACTGGA 0.313213041163  
CGACTGGC -1.14534330128  
CGACTGTA -0.656562334572  
CGACTGTC -0.0497079832313  
CGACTTAA 1.13477302962  
CGACTTAC -0.0274994347271  
CGACTTAG 0.517975461071  
CGACTTCA -0.466141661337  
CGACTTCC -0.564823145521  
CGACTTGA 0.194079492786  
CGACTTGC -0.224078781077  
CGACTTTA -0.0253796300009  
CGACTTTC 1.52177775408  
CGAGAAAA 1.45052722264  
CGAGAAAC 0.919357480095  
CGAGAAAG 0.690266445574  
CGAGAACA 2.2433817617  
CGAGAACC -0.976306256239  
CGAGAACG -1.53800955106  
CGAGAAGA 0.523393640131  
CGAGAAGC -0.260885491598  
CGAGAATA 1.84618367785  
CGAGAATC 11.0242674373  
CGAGACAA 0.270770943478  
CGAGACAC -0.335445898155  
CGAGACAG -0.325900765111  
CGAGACCA -0.802320996245  
CGAGACCC -0.544622269039  
CGAGACCG -0.767087018774  
CGAGACGA -0.721372423533  
CGAGACGC -0.53307730542  
CGAGACTA 0.324156827116  
CGAGACTC -0.54949781991  
CGAGAGAA 0.495268457868  
CGAGAGAC -0.617030720934

CGAGAGAG -0.485647001398  
CGAGAGCA 0.524226924652  
CGAGAGCC -1.27447025214  
CGAGAGCG -0.37498848982  
CGAGAGGA 0.824712511865  
CGAGAGGC -0.781716023819  
CGAGAGTA 0.222881653377  
CGAGAGTC -0.808384265078  
CGAGATAA 0.50040512895  
CGAGATAC 5.11349803601  
CGAGATAG -0.010664107648  
CGAGATCA 4.15446753484  
CGAGATCC 8.3620031133  
CGAGATCG 4.84237161357  
CGAGATGA 0.367942687576  
CGAGATGC 0.166166552377  
CGAGATTA 6.37618076241  
CGAGATTC 10.9412194476  
CGAGCAAA 0.67421081979  
CGAGCAAC -0.81883586949  
CGAGCAAG -0.317352280083  
CGAGCACA -0.586062491075  
CGAGCACC -1.0411390854  
CGAGCACG -1.14785334873  
CGAGCAGA -0.297091285835  
CGAGCAGC -0.309648318986  
CGAGCATA 0.583947391218  
CGAGCATC 0.312728439688  
CGAGCCAA -0.744158886742  
CGAGCCAC -1.25193288559  
CGAGCCAG -0.950788355375  
CGAGCCCA -1.06218056509  
CGAGCCCC -1.38961381048  
CGAGCCCG -0.539495269076  
CGAGCCGA -0.0229560998626  
CGAGCCGC 0.0223436827882  
CGAGCCTA -0.589411312056  
CGAGCCTC -1.28063781222  
CGAGCGAA 0.0976882341272  
CGAGCGAC -0.712470550591  
CGAGCGAG 0.52552546841  
CGAGCGCA -0.439631294561  
CGAGCGCC -1.95881274527  
CGAGCGCG 0.961417960653  
CGAGCGGA -0.148874853035  
CGAGCGGC -0.911617448337  
CGAGCGTA 0.755655233385  
CGAGCGTC -1.11811988552  
CGAGCTAA 0.0805559775574  
CGAGCTAC -0.571615146238  
CGAGCTAG -1.05476778308  
CGAGCTCA -0.839724963708  
CGAGCTCC -0.985629737692  
CGAGCTCG 0.683201823855

CGAGCTGA -0.544896981094  
CGAGCTGC -1.28220270383  
CGAGCTTA -1.58662652751  
CGAGCTTC -0.999910059691  
CGAGGAAA -0.36017677904  
CGAGGAAC -0.226177413894  
CGAGGAAG -0.499114949403  
CGAGGACA -0.561874499761  
CGAGGACC -0.701422996145  
CGAGGACG -1.05594452302  
CGAGGAGA 0.0984943349627  
CGAGGAGC -1.14194534056  
CGAGGATA 2.55861057772  
CGAGGATC 4.76058426732  
CGAGGCAA 1.30564340516  
CGAGGCAC -0.738422344901  
CGAGGCAG -0.858323309638  
CGAGGCCA 0.17592131346  
CGAGGCCC -0.653163328325  
CGAGGCCG -1.368734126  
CGAGGCGA 0.138868381477  
CGAGGCGC -0.590305237107  
CGAGGCTA 0.892808951606  
CGAGGCTC -1.41049846121  
CGAGGGAA 0.925991344947  
CGAGGGAC -0.588134201588  
CGAGGGAG -1.33738663145  
CGAGGGCA -1.34990942361  
CGAGGGCC -0.879901405738  
CGAGGGCG -1.12948527998  
CGAGGGGA 0.368364034705  
CGAGGGGC -0.769604907667  
CGAGGGTA -0.290961626077  
CGAGGGTC -1.00422285599  
CGAGGTAA 0.796676722107  
CGAGGTAC -1.14387172291  
CGAGGTAG -0.388785517252  
CGAGGTCA -0.684077974958  
CGAGGTCC -1.74008104746  
CGAGGTGA 0.116717075542  
CGAGGTGC -1.85138386466  
CGAGGTTA -0.114315501458  
CGAGGTTC -1.07325739427  
CGAGTAAA 0.765239050905  
CGAGTAAC 0.496829428746  
CGAGTAAG -0.243644500285  
CGAGTACA 0.696890377926  
CGAGTACC -0.583438481254  
CGAGTACG -0.577652799674  
CGAGTAGA 1.36188253028  
CGAGTAGC -0.936773858457  
CGAGTATA 1.42100939925  
CGAGTATC 2.30853582884  
CGAGTCAA 0.192218194456

CGAGTCAC -0.590518524487  
CGAGTCAG -0.130565333766  
CGAGTCCA -0.996064090919  
CGAGTCCC -1.22238291226  
CGAGTCCG -0.672191646977  
CGAGTCGA -0.674019488463  
CGAGTCGC -1.0441170059  
CGAGTCTA -0.208109411218  
CGAGTCTC -0.958073844541  
CGAGTGAA 0.00411153247147  
CGAGTGAC -1.08005566815  
CGAGTGAG 0.722005489754  
CGAGTGCA -0.608778119871  
CGAGTGCC -0.709654686681  
CGAGTGCG -0.680585132719  
CGAGTGGA -0.317352280083  
CGAGTGGC -0.387258787362  
CGAGTGTA 0.183873587072  
CGAGTGTC 0.568128054394  
CGAGTTAA 0.0272830107674  
CGAGTTAC -1.07712662601  
CGAGTTAG -0.0362729693068  
CGAGTTCA 0.0011286457223  
CGAGTTCC -0.696303576248  
CGAGTTGA 0.208276434056  
CGAGTTGC -0.455661827713  
CGAGTTTA 0.564806417099  
CGAGTTTC 0.392963963411  
CGATAAAA 1.92153999136  
CGATAAAC 0.675018227533  
CGATAAAG 0.193819156718  
CGATAACA 0.998237740254  
CGATAACC 0.0217427665039  
CGATAACG 1.62547933315  
CGATAAGA 0.339421250816  
CGATAAGC 0.450626311307  
CGATAATA 0.889174701925  
CGATAATC 5.10736654658  
CGATACAA 0.118705405327  
CGATACAC 1.77856687334  
CGATACAG 0.296038179393  
CGATACCA 0.92089989288  
CGATACCC 2.65614355118  
CGATACCG 2.31400184073  
CGATACGA 1.64922454405  
CGATACGC 3.64684356903  
CGATACTA 1.87689915171  
CGATACTC 2.43559864925  
CGATAGAA 1.58516331335  
CGATAGAC -0.351149442933  
CGATAGAG -0.903076543376  
CGATAGCA 0.0377534346544  
CGATAGCC -0.769880665249  
CGATAGCG -0.226001504081

CGATAGGA -0.14847232538  
CGATAGGC 0.208755807899  
CGATAGTA 1.47045364845  
CGATAGTC -0.180274362524  
CGATATAA 4.39946834421  
CGATATAC 1.47229978665  
CGATATAG 1.22174775498  
CGATATCA 7.91926190053  
CGATATCC 21.6768703744  
CGATATCG 15.3960235821  
CGATATGA 1.83956340484  
CGATATGC 3.51877286119  
CGATATTA 3.5197454621  
CGATATTC 8.57336123634  
CGATCAAA 2.05663951164  
CGATCAAC -0.206906271741  
CGATCAAG 1.08217416596  
CGATCACA 1.73403450704  
CGATCACC 1.58631809723  
CGATCACG 1.62800114277  
CGATCAGA 2.44280049631  
CGATCAGC 0.316422284372  
CGATCATA 1.40099331955  
CGATCATC 1.77386670952  
CGATCCAA 1.49589731694  
CGATCCAC 2.71893420595  
CGATCCAG 3.66758838061  
CGATCCCA 1.89425593507  
CGATCCCC 2.68191995844  
CGATCCCG 1.31325535994  
CGATCCGA 3.08729431993  
CGATCCGC 3.32811276242  
CGATCCTA 1.30825983492  
CGATCCTC 4.34151743104  
CGATCGAA 2.32991318388  
CGATCGAC 1.64438663213  
CGATCGAG 1.18976144381  
CGATCGCA 4.04314694368  
CGATCGCC 4.08963784226  
CGATCGCG 7.35717411339  
CGATCGGA 2.14376766799  
CGATCGGC 0.486195902745  
CGATCGTA 2.65811698221  
CGATCGTC 2.3216608442  
CGATCTAA 2.72642122032  
CGATCTAC 2.07001310089  
CGATCTAG 3.35517281469  
CGATCTCA 2.40923570169  
CGATCTCC 6.12480642425  
CGATCTGA 2.97161492931  
CGATCTGC 2.09214846255  
CGATCTTA 2.10045255578  
CGATCTTC 3.93106677762  
CGATGAAA -0.458445803069

CGATGAAC -0.988425997983  
CGATGAAG 0.345027886005  
CGATGACA 0.347704956289  
CGATGACC -0.868521896667  
CGATGACG -0.540374556757  
CGATGAGA 1.25581623193  
CGATGAGC -0.520212626133  
CGATGATA 1.81732793403  
CGATGATC 1.22933461713  
CGATGCAA 0.450282594511  
CGATGCAC -0.563079468908  
CGATGCAG 0.99460296781  
CGATGCCA -0.840073123991  
CGATGCCC 0.316454434308  
CGATGCCG -0.565550309115  
CGATGCGA 1.02123722946  
CGATGCGC 1.90899210657  
CGATGCTA 0.575642252454  
CGATGCTC -0.68756480542  
CGATGGAA 1.12790392134  
CGATGGAC 0.357025562545  
CGATGGAG -0.0153169614004  
CGATGGCA -0.0571552676037  
CGATGGCC -0.83477596461  
CGATGGCG -0.376041596261  
CGATGGGA -0.597968945439  
CGATGGGC -0.889249718442  
CGATGGTA -0.136254565539  
CGATGGTC -1.16277980602  
CGATGTAA 1.33350119406  
CGATGTAC 1.30051797349  
CGATGTAG 0.238891014619  
CGATGTCA -0.1045845261  
CGATGTCC 0.595838424067  
CGATGTGA -0.0183777398645  
CGATGTGC -0.353383210034  
CGATGTTA 1.54847422455  
CGATGTTC 0.819360462349  
CGATTAAC 0.836439397073  
CGATTAAC 0.536679143783  
CGATTAAG 0.0693847896173  
CGATTACA 8.17092480397  
CGATTACC 8.04875164904  
CGATTACG 13.5316006967  
CGATTAGA -0.537020508145  
CGATTAGC 0.514863974578  
CGATTATA 2.41084136882  
CGATTATC 3.55158487682  
CGATTCAA 0.80126893533  
CGATTCAC 1.14618442725  
CGATTCAG 0.279021976251  
CGATTCCA 2.679742127  
CGATTCCC 16.3452831166  
CGATTCCG 5.76550161421

CGATTCGA 3.20864098626  
CGATTCGC 7.9471881714  
CGATTCTA 3.6010889824  
CGATTCTC 10.8297064796  
CGATTGAA 1.81487042429  
CGATTGAC 0.787879401802  
CGATTGAG 0.545657078769  
CGATTGCA 4.87077595137  
CGATTGCC 3.64401071531  
CGATTGCG 13.8488241156  
CGATTGGA -0.162790547711  
CGATTGGC 0.476854647343  
CGATTGTA 1.66477178263  
CGATTGTC 2.68461166609  
CGATTTAA 2.11528491571  
CGATTTAC 3.2957777682  
CGATTTAG 1.38828494646  
CGATTTCA 4.15084217213  
CGATTTCC 18.6288191029  
CGATTTGA 3.83620407852  
CGATTTGC 6.86479130832  
CGATTTTA 3.40620861641  
CGATTTTC 9.45186686437  
CGCAAAAA 2.19253624577  
CGCAAAAC -0.0333499389426  
CGCAAAAG 0.0995921376569  
CGCAAACA -0.286655364318  
CGCAAACC 0.134864538222  
CGCAAACG 0.0301456619834  
CGCAAAGA 0.176546538233  
CGCAAAGC -0.457986555609  
CGCAAATA 1.92129429266  
CGCAAATC 10.5103948831  
CGCAACAA 1.46107945897  
CGCAACAC 0.898711470759  
CGCAACAG -0.287478977721  
CGCAACCA 0.477113937884  
CGCAACCC 0.564835691838  
CGCAACCG -0.373161432479  
CGCAACGA 0.354268770874  
CGCAACGC -0.211547886085  
CGCAACTA -0.705554654999  
CGCAACTC -0.378089782431  
CGCAAGAA 0.084904321753  
CGCAAGAC 0.802318643811  
CGCAAGAG -0.392170931656  
CGCAAGCA 0.160804570361  
CGCAAGCC -0.0642554372194  
CGCAAGCG -0.427759342568  
CGCAAGGA -0.269884598493  
CGCAAGGC -0.634639737531  
CGCAAGTA 0.417114315776  
CGCAAGTC -0.707898986515  
CGCAATAA 2.79848177331

CGCAATAC 1.3190967158  
CGCAATAG 0.126118710092  
CGCAATCA 10.139934568  
CGCAATCC 25.1404992994  
CGCAATGA 0.964019753038  
CGCAATGC 0.396453146308  
CGCAATTA 2.13153657769  
CGCAATTC 4.2563331696  
CGCACAAA 1.01379360443  
CGCACAAC -0.0205749135425  
CGCACAAAG -0.640647332085  
CGCACACA 0.545292712828  
CGCACACC -0.208046156872  
CGCACACG 0.416346376654  
CGCACAGA -0.000391026864419  
CGCACAGC -0.196609927996  
CGCACATA 0.710500256137  
CGCACATC 1.19738699043  
CGCACCAA -0.121664244969  
CGCACCCAC -0.803977371405  
CGCACCCAG -0.428223033515  
CGCACCCA -0.734341655458  
CGCACCCC -0.854808772727  
CGCACCCG -0.920362753705  
CGCACCGA 0.586390786357  
CGCACCGC 0.154924791407  
CGCACCTA -0.0770960693995  
CGCACCTC -1.22356906193  
CGCACGAA 0.657055300258  
CGCACGAC 0.31740089706  
CGCACGAG -0.279461097329  
CGCACGCA 0.354193492975  
CGCACGCC -0.912855351566  
CGCACGCG 0.51178280835  
CGCACGGA 0.0177864946992  
CGCACGGC -0.602317551016  
CGCACGTA 0.0998801801733  
CGCACGTC -0.0175005432355  
CGCACTAA 0.75240573741  
CGCACTAC -0.18084103782  
CGCACTAG -0.387258787362  
CGCACTCA -0.48884683487  
CGCACTCC -0.0690240830178  
CGCACTGA -0.332086883293  
CGCACTGC 0.284429700047  
CGCACTTA -0.360392418855  
CGCACTTC -0.152879480435  
CGCAGAAA -0.458059742455  
CGCAGAAC -0.846262117371  
CGCAGAAG -0.173980555126  
CGCAGACA -0.128639474183  
CGCAGACC -0.208384384655  
CGCAGACG 0.237818827321  
CGCAGAGA 0.246454875182



CGCAGAGC -0.909452163214  
CGCAGATA 2.88082194163  
CGCAGATC 5.79959701345  
CGCAGCAA -0.507216471905  
CGCAGCAC 0.0278081263895  
CGCAGCAG -1.01815632461  
CGCAGCCA -0.22788397432  
CGCAGCCC -1.55902619949  
CGCAGCCG -1.15233473615  
CGCAGCGA -1.14338503038  
CGCAGCGC -0.290019606813  
CGCAGCTA -0.630952688768  
CGCAGCTC -1.26566038551  
CGCAGGAA -0.391964701578  
CGCAGGAC -1.19335073586  
CGCAGGAG -0.365769038241  
CGCAGGCA 0.068077881648  
CGCAGGCC -1.03384784584  
CGCAGGCG -0.273247272698  
CGCAGGGA 0.164811027431  
CGCAGGGC -1.44619508411  
CGCAGGTA -0.0109231368075  
CGCAGGTC -0.552757771148  
CGCAGTAA -0.414961054206  
CGCAGTAC -0.976470926643  
CGCAGTAG -0.471254808076  
CGCAGTCA -0.76572861863  
CGCAGTCC -1.61933843399  
CGCAGTGA -0.511672243935  
CGCAGTGC 0.109540321119  
CGCAGTTA 0.835283567665  
CGCAGTTC -0.0314849812704  
CGCATAAA 0.0153966827865  
CGCATAAC 0.346066093696  
CGCATAAG 0.618694937543  
CGCATACA 1.41101547401  
CGCATACC 0.0976924162327  
CGCATACG 0.633998829863  
CGCATAGA -0.0820769570521  
CGCATAGC -0.49635946464  
CGCATATA 0.939040298257  
CGCATATC 3.53091560452  
CGCATCAA 0.817038086887  
CGCATCAC 0.64984482761  
CGCATCAG 0.385417354033  
CGCATCCA -0.534088590807  
CGCATCCC -0.138758078445  
CGCATCCG 0.829512784836  
CGCATCGA 1.0941747177  
CGCATCGC 1.31374048418  
CGCATCTA 0.241698514319  
CGCATCTC -0.335667288365  
CGCATGAA -0.269757305657  
CGCATGAC 0.281295734736

CGCATGAG -0.821816665186  
CGCATGCA 0.226346266403  
CGCATGCC -0.340312562051  
CGCATGCG -0.0387869374765  
CGCATGGA -1.04039519338  
CGCATGGC -1.10424104564  
CGCATGTA -0.0380511482898  
CGCATGTC 0.106610756215  
CGCATTAA 0.525859252705  
CGCATTAC 0.147423923807  
CGCATTAG 0.173030694413  
CGCATTCA 0.98998174123  
CGCATTCC -0.123046692219  
CGCATTGA 0.849718366186  
CGCATTGC -0.754277229622  
CGCATTTA 0.500923187269  
CGCATTTC 1.66737409778  
CGCCAAAA 0.0718114563348  
CGCCAAAC -0.606948971478  
CGCCAAAG -0.963096291867  
CGCCAACA 0.144975823799  
CGCCAACC -0.0223638091709  
CGCCAACG -0.487463080712  
CGCCAAGA -0.00499735469307  
CGCCAAGC -0.542019953891  
CGCCAATA 0.517301096559  
CGCCAATC 0.998712409228  
CGCCACAA 0.421980456909  
CGCCACAC 0.264622202864  
CGCCACAG -1.45339118077  
CGCCACCA -0.686830323141  
CGCCACCC -0.858002855804  
CGCCACCG -1.09895120495  
CGCCACGA -0.348192432962  
CGCCACGC -1.66279782883  
CGCCACTA -0.264028082501  
CGCCACTC -0.377031448357  
CGCCAGAA -0.235100720127  
CGCCAGAC -0.899841423389  
CGCCAGAG -0.519828917953  
CGCCAGCA -0.91455668436  
CGCCAGCC -0.705109783526  
CGCCAGCG 0.382303515106  
CGCCAGGA -0.663427260753  
CGCCAGGC -1.41789059407  
CGCCAGTA 0.155447293213  
CGCCAGTC -0.837704745369  
CGCCATAA 0.253838905209  
CGCCATAC -1.06105008969  
CGCCATAG -0.16244761506  
CGCCATCA 0.614177740837  
CGCCATCC 0.0960786462722  
CGCCATGA -0.0962945474687  
CGCCATGC -1.21106352095

CGCCATTA -0.234182225206  
CGCCATTC -0.788534424077  
CGCCCAAA 0.831361014086  
CGCCCAAC -0.203575224709  
CGCCCAAG -0.389648860656  
CGCCCACA -0.84865950935  
CGCCCACC -0.46604207495  
CGCCCACG -0.211673610632  
CGCCCAGA -0.742917846934  
CGCCCAGC -0.112465181155  
CGCCCATA -0.630979872454  
CGCCCATC -0.295574488446  
CGCCCCAA 0.504290566343  
CGCCCCAC -0.79378923964  
CGCCCCAG -0.255137448967  
CGCCCCCA -0.609302189967  
CGCCCCCC -0.92474063402  
CGCCCCCG -1.09104545726  
CGCCCCGA -0.482737562876  
CGCCCCGC -0.360456457346  
CGCCCCTA -1.01359129508  
CGCCCCTC -1.14221926847  
CGCCCGAA 0.518653746307  
CGCCCGAC -1.37200766908  
CGCCCGAG -0.46865615227  
CGCCCGCA -0.151775927345  
CGCCCGCC -0.0596896235378  
CGCCCGCG -0.502762790927  
CGCCCGGA 0.276624322891  
CGCCCGGC -1.0405554203  
CGCCCGTA 0.879073087467  
CGCCCGTC -1.28178057255  
CGCCCTAA -0.759183362139  
CGCCCTAC -0.250125979668  
CGCCCTAG 0.130914016813  
CGCCCTCA 0.252291787555  
CGCCCTCC -0.597735793057  
CGCCCTGA -1.03598333346  
CGCCCTGC -1.11658008655  
CGCCCTTA 0.0601156755358  
CGCCCTTC -1.05803818959  
CGCCGAAA 0.86896676814  
CGCCGAAC -0.411678101387  
CGCCGAAG -0.642324356391  
CGCCGACA -0.0681048039522  
CGCCGACC -1.10749054162  
CGCCGACG -0.64208806743  
CGCCGAGA -0.488058769364  
CGCCGAGC -1.15735300137  
CGCCGATA 1.3504917818  
CGCCGATC 0.127431891219  
CGCCGCAA 0.0653359887284  
CGCCGCAC -0.369580504643  
CGCCGCAG -0.650695886079

CGCCGCCA -1.43827417629  
CGCCGCCC -0.368177408247  
CGCCGCCG -0.603584990365  
CGCCGCGA 0.256996656244  
CGCCGCGC -0.49327960532  
CGCCGCTA 1.05663666148  
CGCCGCTC -0.98341217625  
CGCCGGAA 0.905723293396  
CGCCGGAC -0.268134648722  
CGCCGGAG -0.540366976691  
CGCCGGCA -1.01560576302  
CGCCGGCC -0.603680133265  
CGCCGGCG -0.622678915796  
CGCCGGGA -0.852030286384  
CGCCGGGC -1.09872537125  
CGCCGGTA -0.0517864896657  
CGCCGGTC 0.322275141022  
CGCCGTAA 0.19004924999  
CGCCGTAC -0.457749221121  
CGCCGTAG -0.810162444061  
CGCCGTCA 0.0234812154847  
CGCCGTCC -1.25662546934  
CGCCGTGA 0.690415433083  
CGCCGTGC -1.45643366252  
CGCCGTTA -0.227803991552  
CGCCGTTC -0.567420233038  
CGCCTAAA -0.217477327542  
CGCCTAAC -0.658959465169  
CGCCTAAG 0.0117051905364  
CGCCTACA 0.364177747098  
CGCCTACC -0.543343067519  
CGCCTACG -0.412641031179  
CGCCTAGA -0.268077928916  
CGCCTAGC -0.555065770622  
CGCCTATA -0.352397801425  
CGCCTATC 0.594019469556  
CGCCTCAA -0.331852162621  
CGCCTCAC 0.386152359075  
CGCCTCAG -0.603880874329  
CGCCTCCA -0.732147095596  
CGCCTCCC -1.47085277814  
CGCCTCCG -1.55868300546  
CGCCTCGA -0.390231480229  
CGCCTCGC -1.08188298687  
CGCCTCTA -0.919945065918  
CGCCTCTC -0.760781710585  
CGCCTGAA -1.45768019134  
CGCCTGAC -1.07228400922  
CGCCTGAG -0.742487351449  
CGCCTGCA -0.442882358826  
CGCCTGCC -0.432428663361  
CGCCTGGA -0.269702415522  
CGCCTGGC -1.26358083355  
CGCCTGTA 0.339102888035

CGCCTGTC -1.18633891322  
CGCCTTAA 0.211951197884  
CGCCTTAC -0.817630116197  
CGCCTTAG -0.693783596301  
CGCCTTCA -0.857489763735  
CGCCTTCC -1.52823414083  
CGCCTTGA -0.799680780765  
CGCCTTGC -1.05405525686  
CGCCTTTA -1.18020088926  
CGCCTTTC -0.830315487711  
CGCGAAAA 1.69385153048  
CGCGAAAC -0.697947405091  
CGCGAAAG -0.143343234364  
CGCGAACA -0.195405742993  
CGCGAACC -0.583007985769  
CGCGAACG -0.0120917739137  
CGCGAAGA 0.426068203656  
CGCGAAGC 0.0534159425219  
CGCGAATA 2.65833601999  
CGCGAATC 8.29054582902  
CGCGACAA 0.285331989309  
CGCGACAC -0.27595832259  
CGCGACAG 0.469293923359  
CGCGACCA 0.528324342517  
CGCGACCC -0.476335543498  
CGCGACCG -0.189969005841  
CGCGACGA -0.257108004803  
CGCGACGC -0.976202749128  
CGCGACTA -0.0111479249783  
CGCGACTC -0.794015334718  
CGCGAGAA 0.187131970021  
CGCGAGAC -0.274643573173  
CGCGAGAG -0.932142699377  
CGCGAGCA 0.622415965913  
CGCGAGCC -0.355119045199  
CGCGAGCG 0.577677892307  
CGCGAGGA -0.554672391323  
CGCGAGGC -1.0878639205  
CGCGAGTA 2.55091942432  
CGCGAGTC -0.572847560453  
CGCGATAA 2.2196551089  
CGCGATAC 2.06974910548  
CGCGATAG 1.11949998033  
CGCGATCA 5.4122315824  
CGCGATCC 12.8699670364  
CGCGATGA -0.000655283655815  
CGCGATGC 2.01072809606  
CGCGATTA 3.22688777394  
CGCGATTC 6.05309011081  
CGCGCAAA 1.15243615221  
CGCGCAAC -0.250990107217  
CGCGCAAG 1.49436928014  
CGCGCACA 0.805305189902  
CGCGCACC 0.323148678309

CGCGCACG 0.499083060849  
CGCGCAGA 0.714464630771  
CGCGCAGC -0.956790722297  
CGCGCATA 2.80080153496  
CGCGCATC 0.595006969217  
CGCGCCAA 0.0301561172472  
CGCGCCAC 0.00908405591312  
CGCGCCAG -0.757380874667  
CGCGCCCA -1.4620546737  
CGCGCCCC -0.850423835108  
CGCGCCCG -0.157781430846  
CGCGCCGA -0.384675814451  
CGCGCCGC -0.767447725373  
CGCGCCTA 1.15646404257  
CGCGCCTC 0.182398087974  
CGCGCGAA 0.153540253104  
CGCGCGAC 0.172200807853  
CGCGCGAG 0.612705116938  
CGCGCGCA 1.63563819018  
CGCGCGCC -0.590715083446  
CGCGCGCG 2.32315150343  
CGCGCGGA 0.61181171465  
CGCGCGGC -0.330694503542  
CGCGCGTA 0.840052997609  
CGCGCGTC 0.149860523025  
CGCGCTAA 0.862159868673  
CGCGCTAC -0.255939629079  
CGCGCTAG 0.554249737286  
CGCGCTCA -0.743126690828  
CGCGCTCC -0.25619735133  
CGCGCTGA 0.487269135569  
CGCGCTGC -0.251797253579  
CGCGCTTA 0.297590263298  
CGCGCTTC -0.272484561207  
CGCGGAAA 1.72662721406  
CGCGGAAC -0.601176097596  
CGCGGAAG -0.74668409432  
CGCGGACA -0.432278630326  
CGCGGACC -0.721473839592  
CGCGGACG -0.162930648245  
CGCGGAGA -0.15274094819  
CGCGGAGC -0.0920536311083  
CGCGGATA 4.15175674633  
CGCGGATC 4.31376341064  
CGCGGCAA 0.511488231293  
CGCGGCAC -0.851964679604  
CGCGGCAG -0.632860774404  
CGCGGCCA -0.393302713957  
CGCGGCCC -0.533632218544  
CGCGGCCG -0.0859908850386  
CGCGGCGA 0.259422538817  
CGCGGCGC -0.906415954619  
CGCGGCTA 0.453310438894  
CGCGGCTC -1.41269380522

CGCGGGAA -0.117211348136  
CGCGGGAC -0.313340072618  
CGCGGGAG -1.08237647532  
CGCGGGCA -0.551738382932  
CGCGGGCC -0.940283690499  
CGCGGGGA -0.352948793825  
CGCGGGGC -0.524472100587  
CGCGGGTA 0.307094359432  
CGCGGGTC -0.448339745124  
CGCGGTAA 0.88824078549  
CGCGGTAC -0.594206618777  
CGCGGTAG -0.679362651005  
CGCGGTCA -0.326983669054  
CGCGGTCC -0.554463808811  
CGCGGTGA 1.11476426861  
CGCGGTGC -0.0491339892512  
CGCGGTTA 1.12350199392  
CGCGGTTC 0.257390819688  
CGCGTAAA 1.1310143623  
CGCGTAAC 0.770149888291  
CGCGTAAG 0.0962932405608  
CGCGTACA 0.607308632551  
CGCGTACC -0.871183806819  
CGCGTACG -0.149985986191  
CGCGTAGA 0.414679546229  
CGCGTAGC 0.235120585128  
CGCGTATA 0.812675889467  
CGCGTATC 6.22244395035  
CGCGTCAA -0.0929546134623  
CGCGTCAC 0.111556618734  
CGCGTCAG -0.316465150954  
CGCGTCCA -0.319304016445  
CGCGTCCC -0.646404523071  
CGCGTCCG -0.915910379635  
CGCGTCGA -0.377724370963  
CGCGTCGC -0.138595499093  
CGCGTCTA -4.07755286425E-5  
CGCGTCTC -0.930441105201  
CGCGTGAA 1.39224958247  
CGCGTGAC 0.082961995129  
CGCGTGAG 0.498089810792  
CGCGTGCA 0.513524393909  
CGCGTGCC -0.781478166569  
CGCGTGGA 0.352691071574  
CGCGTGGC -0.924526562495  
CGCGTGTA -0.230413364004  
CGCGTGTC -0.363631198185  
CGCGTTAA 0.987603168726  
CGCGTTAC -0.647634062089  
CGCGTTAG -0.63574485891  
CGCGTTCA 0.558559397006  
CGCGTTCC 0.191641325278  
CGCGTTGA 0.702717096416  
CGCGTTGC -0.99847324507

CGCGTTTA 0.558559397006  
CGCGTTTC -0.318105843218  
CGCTAAAA 0.554015016615  
CGCTAAAC -0.108957440165  
CGCTAAAG 0.229403124144  
CGCTAACA 1.07772440571  
CGCTAACC 0.331955669732  
CGCTAACG -0.134164558314  
CGCTAAGA 1.42872172456  
CGCTAAGC -1.02242285637  
CGCTAATA 1.54912088261  
CGCTAATC 1.00936370918  
CGCTACAA 0.134541470572  
CGCTACAC -0.40475148915  
CGCTACAG -0.0728078429706  
CGCTACCA 0.667183314257  
CGCTACCC -1.50410365346  
CGCTACCG -0.902119363979  
CGCTACGA 0.122034099924  
CGCTACGC -0.101298698083  
CGCTACTA -0.342732955611  
CGCTACTC -0.744395959847  
CGCTAGAA 0.177306635907  
CGCTAGAC -0.906285263822  
CGCTAGAG 0.434715752307  
CGCTAGCA 0.311459693431  
CGCTAGCC -0.657378367908  
CGCTAGCG 0.21260648154  
CGCTAGGA -0.505861208341  
CGCTAGGC -0.985928235472  
CGCTAGTA -0.102857316527  
CGCTAGTC -0.874266541337  
CGCTATAA 0.74756965516  
CGCTATAC -0.650459597118  
CGCTATAG -0.857826161847  
CGCTATCA 0.668213419118  
CGCTATCC 2.74101781405  
CGCTATGA -0.487867438037  
CGCTATGC -1.16325316809  
CGCTATTA -0.194360739381  
CGCTATTC 1.69076200004  
CGCTCAAA 0.161682289753  
CGCTCAAC -0.214333952494  
CGCTCAAG -0.0715511202673  
CGCTCACA -0.524784712973  
CGCTCACC -0.133808817965  
CGCTCACG -0.515604991397  
CGCTCAGA 0.888861044012  
CGCTCAGC -1.02904835701  
CGCTCATA 1.32307755747  
CGCTCATC -0.570403119787  
CGCTCCAA -0.330504479123  
CGCTCCAC -1.02929771505  
CGCTCCAG 0.215241469388



CGCTCCCA 0.396812545999  
CGCTCCCC -0.847524067706  
CGCTCCCG -1.18046514605  
CGCTCCGA -0.661584520516  
CGCTCCGC -0.401862699774  
CGCTCCTA 0.623070465424  
CGCTCCTC -1.01145737575  
CGCTCGAA 0.509629808161  
CGCTCGAC -1.01059141852  
CGCTCGAG -0.197270962047  
CGCTCGCA -0.745667581301  
CGCTCGCC -0.367235388983  
CGCTCGGA -0.648158916329  
CGCTCGGC -0.819391043995  
CGCTCGTA -0.0275109355173  
CGCTCGTC -0.927777888141  
CGCTCTAA -0.197068914075  
CGCTCTAC 0.224789739012  
CGCTCTAG -0.30463737245  
CGCTCTCA -0.798933229407  
CGCTCTCC -1.30078615101  
CGCTCTGA -0.932651870722  
CGCTCTGC -0.663783785247  
CGCTCTTA -0.166290970016  
CGCTCTTC -0.675859353502  
CGCTGAAA 1.3530010451  
CGCTGAAC 0.407113855995  
CGCTGAAG -0.55841250055  
CGCTGACA -0.308336967529  
CGCTGACC -0.684077974958  
CGCTGACG -0.424462275143  
CGCTGAGA -0.691870283034  
CGCTGAGC -0.972258500877  
CGCTGATA 1.64010284918  
CGCTGATC -0.203415520555  
CGCTGCAA 0.741313225329  
CGCTGCAC -1.50029689193  
CGCTGCAG -0.757380874667  
CGCTGCCA -1.1081654289  
CGCTGCCC -0.814831503472  
CGCTGCCG -0.956729559004  
CGCTGCGA -0.391029739617  
CGCTGCGC -0.207836006071  
CGCTGCTA -0.0952992063593  
CGCTGCTC -0.261675386775  
CGCTGGAA -0.806303667591  
CGCTGGAC -0.567346523428  
CGCTGGAG 0.101616799483  
CGCTGGCA -1.5141629241  
CGCTGGCC -0.865924025006  
CGCTGGGA -0.49280572049  
CGCTGGGC -1.39711284841  
CGCTGGTA 0.161862120289  
CGCTGGTC -0.85614913754

CGCTGTAA 0.0986485501031  
CGCTGTAC 0.422603852011  
CGCTGTAG -0.288212414473  
CGCTGTCA -0.699599336765  
CGCTGTCC -0.607862238767  
CGCTGTGA -0.148166247534  
CGCTGTGC 0.0209377111948  
CGCTGTGA -0.238690796318  
CGCTGTTC -0.945809036012  
CGCTTAAA 0.942874766239  
CGCTTAAC -0.290309740382  
CGCTTAAG -0.371041104989  
CGCTTACA 1.06718445432  
CGCTTACC -0.881797990583  
CGCTTACG 0.632121064493  
CGCTTAGA -0.111832114934  
CGCTTAGC -0.248601602213  
CGCTTATA 1.58847815473  
CGCTTATC 0.185908181398  
CGCTTCAA 0.898673309046  
CGCTTCAC -0.787748188242  
CGCTTCAG -0.838514244166  
CGCTTCCA -0.667418034928  
CGCTTCCC -0.681457363098  
CGCTTCCG -0.63574485891  
CGCTTCGA 0.103052568578  
CGCTTCGC -0.614344240913  
CGCTTCTA -0.0921652410489  
CGCTTCTC -0.400435817653  
CGCTTGAA -0.749468331058  
CGCTTGAC -0.992801787246  
CGCTTGAG -1.14948097191  
CGCTTGCA 0.419368470642  
CGCTTGCC -0.823908763464  
CGCTTGGA -0.392777075572  
CGCTTGGC -0.71959084659  
CGCTTGTA -0.256458732924  
CGCTTGTC -1.19585215771  
CGCTTTAA 0.867529692137  
CGCTTTAC -0.376319444896  
CGCTTTAG -0.764986817667  
CGCTTTCA -0.126221433058  
CGCTTTCC -0.97616693985  
CGCTTTGA 1.24723246038  
CGCTTTGC -1.23732505245  
CGCTTTTA 0.675531842365  
CGCTTTTC 0.501604086321  
CGGAAAAA -0.131767427717  
CGGAAAAC 0.569933155681  
CGGAAAAG 0.130197569864  
CGGAAACA -0.10267905428  
CGGAAACC -0.654198660819  
CGGAAACG -0.837985469201  
CGGAAAGA 0.321389057419

CGGAAAGC -0.833837343307  
CGGAAATA 1.0408081763  
CGGAAATC 19.4921016055  
CGGAACAA -0.00265145488815  
CGGAACAC 0.409670690746  
CGGAACAG -0.424281660462  
CGGAACCA -1.31584094667  
CGGAACCC -0.371974237279  
CGGAACCG -0.108548639352  
CGGAACGA 0.471458162956  
CGGAACGC -0.689529872243  
CGGAACTA -0.292249975954  
CGGAACTC 0.0383431115302  
CGGAAGAA 0.63347188457  
CGGAAGAC -0.719240595254  
CGGAAGAG -0.466943057304  
CGGAAGCA -0.251187450321  
CGGAAGCC -1.73967067835  
CGGAAGGA -0.172932153553  
CGGAAGGC -1.88029685105  
CGGAAGTA 0.00348709184373  
CGGAAGTC -1.21177369474  
CGGAATAA 0.882371984563  
CGGAATAC 1.09611626018  
CGGAATAG 1.49642948987  
CGGAATCA 4.8888162476  
CGGAATCC 16.4754704925  
CGGAATGA -0.38854583033  
CGGAATGC 0.678157943238  
CGGAATTA 1.41135474732  
CGGAATTC 2.52966779383  
CGGACAAA 0.493169563669  
CGGACAAC -0.0146718716267  
CGGACAAG -0.952222556181  
CGGACACA -0.253611241841  
CGGACACC -1.0377649104  
CGGACACG -0.47635227192  
CGGACAGA 0.928873077019  
CGGACAGC -0.58783936315  
CGGACATA 0.461429473963  
CGGACATC 0.239811861974  
CGGACCAA 0.583041965376  
CGGACCAC -1.52605343419  
CGGACCAG -1.22918667514  
CGGACCCA -0.999910059691  
CGGACCCC -0.580509439114  
CGGACCCG -1.55045863361  
CGGACCGA -0.435164805885  
CGGACCGC -0.629492088422  
CGGACCTA -0.373017149839  
CGGACCTC -1.31183083025  
CGGACGAA -0.430490780224  
CGGACGAC 0.270026528699  
CGGACGAG -1.17780219037

CGGACGCA -1.08921421781  
CGGACGCC -1.35767899149  
CGGACGGA -0.718098357689  
CGGACGGC -0.569097780107  
CGGACGTA 0.133871288166  
CGGACGTC -0.897044901716  
CGGACTAA -0.766858832642  
CGGACTAC 0.035485687946  
CGGACTAG -0.310826888593  
CGGACTCA 0.0507409632903  
CGGACTCC -0.86987846714  
CGGACTGA -1.11337476406  
CGGACTGC -1.09553965239  
CGGACTTA -0.000391026864419  
CGGACTTC -0.36377469668  
CGGAGAAA 0.940895323429  
CGGAGAAC -1.10306953334  
CGGAGAAG -0.397350730701  
CGGAGACA 0.697512988882  
CGGAGACC -0.787690684292  
CGGAGACG -0.696783211472  
CGGAGAGA 0.212221466453  
CGGAGAGC -0.789266031158  
CGGAGATA 2.21045238574  
CGGAGATC 6.96308098149  
CGGAGCAA 0.852407198643  
CGGAGCAC -1.05050046718  
CGGAGCAG -0.881386575954  
CGGAGCCA 0.0285282326806  
CGGAGCCC -1.09134996682  
CGGAGCCG -0.345953176847  
CGGAGCGA -0.841584432367  
CGGAGCGC -0.220886789052  
CGGAGCTA -0.00830879810572  
CGGAGCTC -0.753818243543  
CGGAGGAA -0.647542055768  
CGGAGGAC -1.96351264771  
CGGAGGAG -0.77251120961  
CGGAGGCA -0.673733536999  
CGGAGGCC -0.821856395189  
CGGAGGGA -1.02477502933  
CGGAGGGC -1.30041995539  
CGGAGGTA -0.559981574258  
CGGAGGTC -1.04557342414  
CGGAGTAA -1.04910103013  
CGGAGTAC 0.0944188731512  
CGGAGTAG 0.18009662304  
CGGAGTCA -0.116662969552  
CGGAGTCC -0.318683235159  
CGGAGTGA -0.109700548036  
CGGAGTGC -0.328203014189  
CGGAGTTA 0.885115445772  
CGGAGTTC -0.572923361115  
CGGATAAA -0.171854738623

CGGATAAC 1.59560603079  
CGGATAAG 0.228910681221  
CGGATACA 2.08170391544  
CGGATACC 5.57747415084  
CGGATACG 4.98307201863  
CGGATAGA 0.766891505342  
CGGATAGC 1.05923819248  
CGGATATA 2.99024437965  
CGGATATC 20.5305934181  
CGGATCAA -0.100127447161  
CGGATCAC 2.54001745942  
CGGATCAG 0.491889316622  
CGGATCCA 1.50495575746  
CGGATCCC 4.71386596676  
CGGATCCG 6.93901218018  
CGGATCGA 0.320067773462  
CGGATCGC 5.96865340073  
CGGATCTA 3.62425026682  
CGGATCTC 6.51716790309  
CGGATGAA -0.619499470089  
CGGATGAC 0.216900458364  
CGGATGAG -0.825079230241  
CGGATGCA 0.644371235653  
CGGATGCC -0.243537595213  
CGGATGGA -0.00236707171402  
CGGATGGC -0.434460121108  
CGGATGTA 0.144839905371  
CGGATGTC 1.22838527918  
CGGATTAA 1.14990441009  
CGGATTAC 16.7020574914  
CGGATTAG 0.455069537021  
CGGATTCA 1.72135619283  
CGGATTCC 9.84805392422  
CGGATTGA 0.731051383954  
CGGATTGC 14.4071490533  
CGGATTTA 2.65977257323  
CGGATTTTC 25.5993837008  
CGGCAAAA 0.597667572461  
CGGCAAAC 1.02028684599  
CGGCAAAG -0.929213134473  
CGGCAACA -0.0758641779476  
CGGCAACC -0.566687841812  
CGGCAACG 0.325580049895  
CGGCAAGA 0.87395706553  
CGGCAAGC -1.66073657359  
CGGCAATA -0.479406515844  
CGGCAATC 6.32309938833  
CGGCACAA -0.490391338708  
CGGCACAC -0.258132097888  
CGGCACAG -0.884870269837  
CGGCACCA -1.17495103994  
CGGCACCC -1.3428461088  
CGGCACCG -1.39717244341  
CGGCACGA -1.22992533953

CGGCACGC -0.62355532828  
CGGCACTA -0.208171620037  
CGGCACTC -0.368645804063  
CGGCAGAA 0.146085650047  
CGGCAGAC -0.371626076996  
CGGCAGAG -1.43181752815  
CGGCAGCA -0.525383276823  
CGGCAGCC -0.882874359986  
CGGCAGGA -1.47147591186  
CGGCAGGC -0.640451818653  
CGGCAGTA -0.585253253661  
CGGCAGTC -0.766721868687  
CGGCATAA 1.13177184616  
CGGCATAC 0.0921179309804  
CGGCATAG -0.251609058832  
CGGCATCA -0.324327247916  
CGGCATCC 0.23068337119  
CGGCATGA 0.824148711767  
CGGCATGC -0.0922399961847  
CGGCATTA 1.07324641624  
CGGCATTC -0.842906500469  
CGGCCAAA 1.61094259581  
CGGCCAAC -1.3734332443  
CGGCCAAG -0.185301514719  
CGGCCACA -1.19854883162  
CGGCCACC -0.655860263611  
CGGCCACG -1.10958943582  
CGGCCAGA 0.585668327632  
CGGCCAGC -0.752176767133  
CGGCCATA -0.880360130435  
CGGCCATC -0.820956196979  
CGGCCCAA -1.26107052473  
CGGCCCAC -0.658778589106  
CGGCCCAG -1.1298783979  
CGGCCCCA -0.562067137995  
CGGCCCCC -1.53437033512  
CGGCCCCG -1.58037532532  
CGGCCCGA -0.985912029814  
CGGCCCGC -1.38622473674  
CGGCCCTA -1.25369747273  
CGGCCCTC -0.32941660893  
CGGCCGAA -0.21997456729  
CGGCCGAC 0.746423235489  
CGGCCGAG -0.0615906518699  
CGGCCGCA -0.375364879315  
CGGCCGCC -0.828221559762  
CGGCCGGA 0.146021088793  
CGGCCGGC -0.688596478571  
CGGCCGTA 0.525997000805  
CGGCCGTC -0.67317940802  
CGGCCTAA -0.30028014128  
CGGCCTAC -1.61667939903  
CGGCCTAG -0.670904081246  
CGGCCTCA -1.27203966469

CGGCCTCC -0.724028060527  
CGGCCTGA -1.02136792026  
CGGCCTGC -0.702403961267  
CGGCCTTA -0.822589831941  
CGGCCTTC -0.966020367757  
CGGCGAAA -0.176274178612  
CGGCGAAC -0.301740480245  
CGGCGAAG -0.331996706643  
CGGCGACA -0.193374808009  
CGGCGACC -0.773568759538  
CGGCGACG -0.49888807018  
CGGCGAGA 0.501390014796  
CGGCGAGC -0.763188773683  
CGGCGATA 2.01860718282  
CGGCGATC 4.75740429885  
CGGCGCAA -0.424931716486  
CGGCGCAC 0.986515298532  
CGGCGCAG -0.494156540567  
CGGCGCCA -0.518339042868  
CGGCGCCC -0.889852203016  
CGGCGCCG -0.00106094788949  
CGGCGCGA 0.358332209132  
CGGCGCGC -0.847063251956  
CGGCGCTA 0.110149862996  
CGGCGCTC -1.34293942203  
CGGCGGAA -1.28029749339  
CGGCGGAC -1.12457078325  
CGGCGGAG -0.453935925049  
CGGCGGCA -0.881562747148  
CGGCGGCC -1.1541928979  
CGGCGGGA 0.669973824153  
CGGCGGGC -1.38965275634  
CGGCGGTA -0.112598485768  
CGGCGGTC -0.87987396067  
CGGCGTAA -0.281227252759  
CGGCGTAC 0.0686163277314  
CGGCGTAG -1.0009778035  
CGGCGTCA -0.446924363793  
CGGCGTCC -0.960477509678  
CGGCGTGA -0.477042319328  
CGGCGTGC -0.749697301334  
CGGCGTTA 0.200796738366  
CGGCGTTC -0.86304333846  
CGGCTAAA 0.266069211367  
CGGCTAAC -0.847272618613  
CGGCTAAG -0.978716717298  
CGGCTACA -0.112331353779  
CGGCTACC -1.57800354873  
CGGCTACG -0.717416935874  
CGGCTAGA -0.253909216858  
CGGCTAGC 0.400811423004  
CGGCTATA 0.459366911806  
CGGCTATC 0.601336585894  
CGGCTCAA -0.206045280771

CGGCTCAC -1.2203600801  
CGGCTCAG -0.923748168108  
CGGCTCCA -1.57679021537  
CGGCTCCC -1.19328643599  
CGGCTCGA 0.30052610136  
CGGCTCGC -0.672213864412  
CGGCTCTA -0.706689051117  
CGGCTCTC -1.33658941759  
CGGCTGAA -0.333498343899  
CGGCTGAC -1.29185552609  
CGGCTGAG -0.637750178498  
CGGCTGCA -0.96379705592  
CGGCTGCC -1.86384680044  
CGGCTGGA 0.50290759633  
CGGCTGGC -0.799469323056  
CGGCTGTA -0.846229444672  
CGGCTGTC -1.04540823097  
CGGCTTAA -0.801757457529  
CGGCTTAC -0.655342728055  
CGGCTTAG -1.19863639445  
CGGCTTCA -1.38087425551  
CGGCTTCC -0.87188587778  
CGGCTTGA -0.81466395787  
CGGCTTGC -1.24855609678  
CGGCTTTA -0.474094457712  
CGGCTTTC -0.741370990662  
CGGGAAAA 0.337427432018  
CGGGAAAC 0.0680067858545  
CGGGAAAG -0.977022441806  
CGGGAACA -0.356433533235  
CGGGAACG -0.828656760116  
CGGGAAGC -0.873952360661  
CGGGAAGA 0.297253081042  
CGGGAAGC -1.23383299436  
CGGGAATA 0.922420349612  
CGGGAATC 17.9242051602  
CGGGACAA 0.126407275371  
CGGGACAC -0.851554571883  
CGGGACAG -0.453785107869  
CGGGACCA -0.0758584275525  
CGGGACCC -0.855055778333  
CGGGACCG -1.390234069  
CGGGACGA -0.649141711122  
CGGGACGC -1.74045403899  
CGGGACTA -0.628044295773  
CGGGACTC -1.09430645403  
CGGGAGAA -0.262848205986  
CGGGAGAC -0.685384621546  
CGGGAGAG -0.44976427481  
CGGGAGCA -1.04847606674  
CGGGAGCC -1.28572403666  
CGGGAGGA -0.664284069618  
CGGGAGGC -0.788235403533  
CGGGAGTA 0.234019384473



CGGGAGTC -0.0895101268184  
CGGGATAA 0.787233789266  
CGGGATAC 2.00197886997  
CGGGATAG 0.346452938455  
CGGGATCA 0.907464617574  
CGGGATCC 5.36293605932  
CGGGATGA -0.79800061988  
CGGGATGC 0.28326916577  
CGGGATTA 1.47775795709  
CGGGATTC 9.77499201834  
CGGGCAAA 0.328608939805  
CGGGCAAC -0.599311924068  
CGGGCAAG -0.606231740384  
CGGGCACA -0.679844638664  
CGGGCACC -0.964868459073  
CGGGCACG -1.4714683318  
CGGGCAGA -0.816970650436  
CGGGCAGC -1.01874417182  
CGGGCATA -0.171759072959  
CGGGCATC -0.384509837139  
CGGGCCAA -0.479747096061  
CGGGCCAC -1.10558846776  
CGGGCCAG -1.14940151191  
CGGGCCCA -1.12637405487  
CGGGCCCC -1.03989020414  
CGGGCCCG -1.11639947187  
CGGGCCGA -0.98263482739  
CGGGCCGC -1.68524318906  
CGGGCCTA -0.699319135696  
CGGGCCTC -0.173021284676  
CGGGCGAA 0.0852360149956  
CGGGCGAC -0.498120131057  
CGGGCGAG -0.964901131773  
CGGGCGCA -0.146924684963  
CGGGCGCC -1.55672055245  
CGGGCGGA -1.02824486999  
CGGGCGGC -1.09188684461  
CGGGCGTA -1.00046157485  
CGGGCGTC -1.50236154514  
CGGGCTAA -1.31279323728  
CGGGCTAC -1.25666258553  
CGGGCTAG 0.504571812938  
CGGGCTCA -1.17800554525  
CGGGCTCC -1.49135006135  
CGGGCTGA 0.120737385837  
CGGGCTGC -1.52288339822  
CGGGCTTA -1.09809570299  
CGGGCTTC -1.35187867254  
CGGGGAAA 2.62203220765  
CGGGGAAC -0.313177493266  
CGGGGAAG -0.760465700238  
CGGGGACA -0.917102279703  
CGGGGACC -0.483374549821  
CGGGGACG -0.88064137703

CGGGGAGA -0.753706894984  
CGGGGAGC -0.404880350276  
CGGGGATA 0.66798575575  
CGGGGATC 4.69941574672  
CGGGGCAA -0.890580412137  
CGGGGCAC -1.08235870137  
CGGGGCAG 0.0616392688464  
CGGGGCCA 0.0737025521664  
CGGGGCCC -0.753065725934  
CGGGGCGA -0.685027574288  
CGGGGCGC -0.165866486307  
CGGGGCTA 0.857818843162  
CGGGGCTC -1.17899252215  
CGGGGGAA -0.023494545946  
CGGGGGAC -0.286433712727  
CGGGGGAG -0.824028214852  
CGGGGGCA -1.04647257682  
CGGGGGCC -1.4650396515  
CGGGGGGA -0.0925523471894  
CGGGGGGC -0.964052687119  
CGGGGGTA -1.60431160616  
CGGGGGTC -1.22362944108  
CGGGGTAA -0.301750674127  
CGGGGTAC -0.242380197516  
CGGGGTAG 0.395098405507  
CGGGGTCA -1.1643891325  
CGGGGTCC -1.01321490558  
CGGGGTGA -0.514661926606  
CGGGGTGC -0.179407359777  
CGGGGTTA -0.645682587109  
CGGGGTTC -0.380912180881  
CGGGTAAA -0.467205484424  
CGGGTAAC -0.886037600035  
CGGGTAAG 0.217699240515  
CGGGTACA -1.00796218107  
CGGGTACC 0.465686595982  
CGGGTACG 0.276936673895  
CGGGTAGA 0.28128815467  
CGGGTAGC -0.707223053713  
CGGGTATA -0.195474486352  
CGGGTATC 3.26379459362  
CGGGTCAA -0.778200441382  
CGGGTCAC -0.846895967736  
CGGGTCAG -1.15058426362  
CGGGTCCA -1.56878409715  
CGGGTCCC -1.17540140043  
CGGGTCGA -0.050879495535  
CGGGTCGC -0.281432698692  
CGGGTCTA -1.04950094397  
CGGGTCTC -1.0117448955  
CGGGTGAA 0.262193967857  
CGGGTGAC -0.485952556481  
CGGGTGAG -0.674630598629  
CGGGTGCA -0.523008886424

CGGGTGCC -0.575430533363  
CGGGTGGA 0.239077641077  
CGGGTGGC -0.856188606161  
CGGGTGTA -0.047287066909  
CGGGTGTC -0.466701540711  
CGGGTTAA 0.0274555226194  
CGGGTTAC -0.211322052388  
CGGGTTAG -1.16932976739  
CGGGTTCA -0.450575341896  
CGGGTTCC -0.702025219337  
CGGGTTGA -0.166345337387  
CGGGTTGC 0.717318917776  
CGGGTTTA -0.539034453326  
CGGGTTTC 0.7081491287  
CGGTAAAA 0.127473712274  
CGGTAAAC 0.127361318189  
CGGTAAAG -0.0204797706424  
CGGTAACA -0.119410612867  
CGGTAACC -0.212897922017  
CGGTAACG -0.935733559713  
CGGTAAGA 0.152345216457  
CGGTAAGC -0.420065836734  
CGGTAATA 1.56259431963  
CGGTAATC 6.13950992305  
CGGTACAA -0.765393788809  
CGGTACAC -0.0991015244052  
CGGTACAG -0.573264464095  
CGGTACCA -0.38846218822  
CGGTACCC -0.282608393101  
CGGTACCG 0.194211229109  
CGGTACGA -0.575256975985  
CGGTACGC -1.07520886925  
CGGTACTA 0.639938726584  
CGGTACTC -0.65698838657  
CGGTAGAA 0.218638645963  
CGGTAGAC -1.14346632005  
CGGTAGAG -0.14277682045  
CGGTAGCA -0.0648171462646  
CGGTAGCC -1.33914311576  
CGGTAGGA 0.181850493535  
CGGTAGGC -0.0525873628693  
CGGTAGTA -0.0958873149455  
CGGTAGTC 0.338456229972  
CGGTATAA 1.6894205897  
CGGTATAC -0.0152171136315  
CGGTATAG -0.016789062537  
CGGTATCA 2.09426513069  
CGGTATCC 3.59210085354  
CGGTATGA -0.145410762772  
CGGTATGC -1.05386967593  
CGGTATTA 0.421682743274  
CGGTATTC 1.43094399087  
CGGTCAAA 0.0624181859961  
CGGTCAAC -0.406925661247

CGGTCAAG -0.140494959136  
CGGTCACA -0.189026463813  
CGGTCACC -0.890356146729  
CGGTCACG -0.487897758302  
CGGTCAGA 1.41055152168  
CGGTCAGC -0.958449711273  
CGGTCATA 0.759789767436  
CGGTCATC 0.537346712374  
CGGTCCAA -0.760462302277  
CGGTCCAC -0.570555243874  
CGGTCCAG -0.319930286744  
CGGTCCCA -0.409801120162  
CGGTCCCC -1.87378923351  
CGGTCCGA -0.399327559695  
CGGTCCGC -0.894306668139  
CGGTCCTA 0.334443238361  
CGGTCCTC -0.948204859701  
CGGT CGAA -0.886137709186  
CGGT CGAC -1.03158114466  
CGGT CGAG -1.18055924342  
CGGT CGCA -0.188083399022  
CGGT CGCC -0.996534577788  
CGGT CGGA -0.596349163702  
CGGT CGGC -1.34028927405  
CGGT CGTA 0.469164016707  
CGGT CGTC -1.81048548667  
CGGTCTAA 0.144994904656  
CGGTCTAC -0.0381583147433  
CGGTCTAG -0.843808266968  
CGGTCTCA -0.549413132273  
CGGTCTCC -0.863327460253  
CGGTCTGA -0.081206294963  
CGGTCTGC -0.350819840743  
CGGTCTTA 0.514063362756  
CGGTCTTC -0.904237600416  
CGGTGAAA 0.80357641204  
CGGTGAAC -0.604973972154  
CGGTGAAG -1.1878246062  
CGGTGACA -0.578511176828  
CGGTGACC -1.73361917169  
CGGTGACG 0.434363409918  
CGGTGAGA 0.658262099077  
CGGTGAGC -0.791874880846  
CGGTGATA 2.00829620171  
CGGTGATC 1.65521462603  
CGGTGCAA -0.143412239105  
CGGTGCAC -0.948701223348  
CGGTGCAG 0.166828893336  
CGGTGCCA -1.06864975954  
CGGTGCCC -0.860707893919  
CGGTGCGA -0.269380916162  
CGGTGCGC -0.0468521279368  
CGGTGCTA -0.180697800706  
CGGTGCTC -1.09384694518

CGGTGGAA 1.07368971943  
CGGTGGAC -0.385141073689  
CGGTGGAG -1.07149489818  
CGGTGGCA -0.400843311558  
CGGTGGCC -1.113174023  
CGGTGGGA 0.30907667744  
CGGTGGGC -0.982896731747  
CGGTGGTA 0.215582049605  
CGGTGGTC -1.05963679942  
CGGTGTAA -0.122606786997  
CGGTGTAC -0.251299060261  
CGGTGTAG -0.074730565975  
CGGTGTCA -0.909808426326  
CGGTGTCC -0.743125122538  
CGGTGTGA 0.799180235013  
CGGTGTGC -1.48108429925  
CGGTGTTA 0.144858202082  
CGGTGTTC -0.0288648921735  
CGGTTAAA 1.3666409822  
CGGTTAAC 0.919791634922  
CGGTTAAG -0.10111285577  
CGGTTACA -0.47308552476  
CGGTTACC 0.164732351571  
CGGTTACG 2.04341987615  
CGGTTAGA 0.430918923275  
CGGTTAGC -0.614216948077  
CGGTTATA -0.483532947066  
CGGTTATC 0.288122499205  
CGGTTCAA 0.619532665551  
CGGTTCAC -0.30822561897  
CGGTTCAG -0.871858694095  
CGGTTCCA 0.0711467629416  
CGGTTCCC -0.55324995269  
CGGTTCGA -0.123362441184  
CGGTTCGC -0.316985300326  
CGGTTCTA -0.497450471413  
CGGTTCTC 0.509426714662  
CGGTTGAA -0.835413997081  
CGGTTGAC 0.0305283246368  
CGGTTGAG 0.143804572877  
CGGTTGCA 0.0420662309531  
CGGTTGCC -0.795132218269  
CGGTTGGA -0.221273111048  
CGGTTGGC -0.425672994686  
CGGTTGTA 0.859819980644  
CGGTTGTC -0.242470635547  
CGGTTTAA -0.0781052637334  
CGGTTTAC 1.11067312391  
CGGTTTAG 0.00726091929592  
CGGTTTCA 0.453310438894  
CGGTTTCC -0.883404964622  
CGGTTTGA 0.739130427639  
CGGTTTGC -0.0410290687887  
CGGTTTTA 0.393282064811

CGGTTTTTC 0.0901390109332  
CGTAAAAA 1.1310143623  
CGTAAAAC 0.0431060069335  
CGTAAAAG -0.234796733333  
CGTAAACA 0.128628234774  
CGTAAACC 1.13207740125  
CGTAAACG -0.251974993063  
CGTAAAGA -0.407419933841  
CGTAAAGC 0.668965675346  
CGTAAATA 1.57340689202  
CGTAAATC 2.85094654822  
CGTAAACA 0.729878041979  
CGTAAACAC 0.247084543442  
CGTAAACAG 0.851967554802  
CGTAAACCA -0.440076166034  
CGTAAACCC 0.560114094726  
CGTAAACGA 0.204572656871  
CGTAAACGC 0.100906625692  
CGTAAACTA 0.384797618274  
CGTAAACTC 0.235669486475  
CGTAAGAA 1.17008411467  
CGTAAGAC 0.431328508232  
CGTAAGAG 0.175705673645  
CGTAAGCA -0.326258073749  
CGTAAGCC -0.753638935769  
CGTAAGGA 0.202297330097  
CGTAAGGC -1.15253443169  
CGTAAGTA 0.735369930648  
CGTAAGTC 0.592003171941  
CGTAATAA 2.80580490143  
CGTAATAC 1.11724870066  
CGTAATAG 2.46158599146  
CGTAATCA 10.9650467323  
CGTAATCC 23.4778917563  
CGTAATGA 0.720409493742  
CGTAATGC 1.0762306099  
CGTAATTA 2.82975895622  
CGTAATTC 3.06131638746  
CGTACAAA 1.27243539643  
CGTACAAC 0.0112482955103  
CGTACAAG -0.265469079228  
CGTACACA 0.858587827811  
CGTACACC -0.023620009111  
CGTACACG 0.467763795509  
CGTACAGA 0.496087627783  
CGTACAGC 0.0490827584588  
CGTACATA 1.65895865598  
CGTACATC 2.23356792838  
CGTACCAA 0.239883741913  
CGTACCAC -0.432531386327  
CGTACCAG -0.900994900363  
CGTACCCA 0.405661097096  
CGTACCCC -0.470660426332  
CGTACCGA -0.0665631753116

CGTACCGC -1.3985175131  
CGTACCTA -0.347801667479  
CGTACCTC -0.954691043953  
CGTACGAA -0.0612589586273  
CGTACGAC 0.334936204047  
CGTACGAG -0.36423054618  
CGTACGCA 0.318489290017  
CGTACGCC 0.0526778009008  
CGTACGGA 0.505789067021  
CGTACGGC 0.275844360215  
CGTACGTA -0.403986686606  
CGTACGTC -0.330763246901  
CGTACTAA 1.10201877933  
CGTACTAC 1.05347446696  
CGTACTAG -0.466526937807  
CGTACTCA -0.199129907942  
CGTACTCC -0.2007366206  
CGTACTGA -0.768596236097  
CGTACTGC -0.0746704482084  
CGTACTTA 2.15698364414  
CGTACTTC -0.0835976751652  
CGTAGAAA 2.14774432756  
CGTAGAAC -0.636426803489  
CGTAGAAG 0.286914393478  
CGTAGACA -0.549793181111  
CGTAGACC -0.951378293632  
CGTAGACG -0.488636161305  
CGTAGAGA 0.843703191567  
CGTAGAGC -0.0485929293519  
CGTAGATA 1.82660567371  
CGTAGATC 1.96019231732  
CGTAGCAA 1.02631535107  
CGTAGCAC -0.00833336797554  
CGTAGCAG -0.15468588863  
CGTAGCCA -0.660139080302  
CGTAGCCC -0.230668733821  
CGTAGCGA -1.27807967057  
CGTAGCGC -0.143006836253  
CGTAGCTA 1.42172741449  
CGTAGCTC -0.268626568882  
CGTAGGAA 0.332882528864  
CGTAGGAC -1.17915849946  
CGTAGGAG -1.15669196732  
CGTAGGCA 0.912565479378  
CGTAGGCC -0.661588702622  
CGTAGGGA -0.863836370216  
CGTAGGGC -1.30162231072  
CGTAGGTA 0.346956620786  
CGTAGGTC -1.20914863939  
CGTAGTAA 0.520663248001  
CGTAGTAC -0.359461116236  
CGTAGTAG -0.658560596857  
CGTAGTCA -0.934220160285  
CGTAGTCC -0.233811586106

CGTAGTGA 2.15793638005  
CGTAGTGC 0.217706820581  
CGTAGTTA -0.781723865267  
CGTAGTTC -0.677973146452  
CGTATAAA -0.295529008049  
CGTATAAC 1.02926033748  
CGTATAAG 0.72607180321  
CGTATACA 1.09163931624  
CGTATACC -0.415195513496  
CGTATACG 1.39106186451  
CGTATAGA 0.823805256352  
CGTATAGC 0.206367041513  
CGTATATA 0.409599856334  
CGTATATC 1.84911585657  
CGTATCAA 1.99803592862  
CGTATCAC 2.37908402793  
CGTATCAG 4.31452978147  
CGTATCCA 5.80730515666  
CGTATCCC 2.24468866967  
CGTATCGA 4.17782825341  
CGTATCGC 2.63621425017  
CGTATCTA 6.44888248445  
CGTATCTC 5.00516974134  
CGTATGAA 0.436417085101  
CGTATGAC 1.31135041088  
CGTATGAG -0.372509546784  
CGTATGCA -0.123717136007  
CGTATGCC 0.218781098932  
CGTATGGA 0.154143783204  
CGTATGGC -0.896765746174  
CGTATGTA 0.870389729537  
CGTATGTC 0.133682047892  
CGTATTAA 0.598035336364  
CGTATTAC 2.47592146497  
CGTATTAG 1.17083454122  
CGTATTCA 1.12266870939  
CGTATTCC 2.68110915273  
CGTATTGA 2.48835695568  
CGTATTGC 1.57553924307  
CGTATTTA 1.72984246904  
CGTATTTT 1.12423098718  
CGTCAAAA 0.259723911795  
CGTCAAAC 0.23068337119  
CGTCAAAG -0.124636415073  
CGTCAACA 0.159594896344  
CGTCAACC 0.710547043442  
CGTCAACG -0.228415624482  
CGTCAAGA 0.241016831122  
CGTCAAGC -0.16231326492  
CGTCAATA 1.96187796722  
CGTCAATC 0.414417380491  
CGTCACAA 0.806477224969  
CGTCACAC -0.0597366722247  
CGTCACAG -0.550607123394



CGTCACCA -0.77366913007  
CGTCACCC -1.11027321007  
CGTCACGA -0.539282243077  
CGTCACGC 0.23294641303  
CGTCACTA 0.37162503147  
CGTCACTC -0.477939380958  
CGTCAGAA -0.316465150954  
CGTCAGAC -0.77045152265  
CGTCAGAG -1.26160008384  
CGTCAGCA -0.788213447479  
CGTCAGCC -1.67657263883  
CGTCAGGA 0.135769179919  
CGTCAGGC 0.0998801801733  
CGTCAGTA 0.0269905247639  
CGTCAGTC -0.996355270015  
CGTCATAA 0.772269954398  
CGTCATAC 0.723305079038  
CGTCATAG -1.04768956952  
CGTCATCA -0.619731054181  
CGTCATCC -0.308970295131  
CGTCATGA -0.64543349045  
CGTCATGC -1.10275169332  
CGTCATTA 0.829384446473  
CGTCATTC 0.245663673098  
CGTCCAAA -0.498543569239  
CGTCCAAC -0.336772409744  
CGTCCAAG -0.917060458648  
CGTCCACA -0.844606526355  
CGTCCACC -0.0605331019412  
CGTCCACG -0.59190306279  
CGTCCAGA -0.404194223592  
CGTCCAGC -0.324206489619  
CGTCCATA 0.302259061327  
CGTCCATC -0.256014906978  
CGTCCCAA -0.646404523071  
CGTCCCAC -0.161182266764  
CGTCCCAG -0.840913988579  
CGTCCCCA -0.702263076588  
CGTCCCCC -1.0320762014  
CGTCCCCG 0.368372660297  
CGTCCCCG -0.975578569882  
CGTCCCTA -1.00423069744  
CGTCCCTC -0.689529872243  
CGTCCGAA -0.604274515009  
CGTCCGAC -1.24790368832  
CGTCCGAG -0.432614505674  
CGTCCGCA 0.111655420977  
CGTCCGCC -1.11429900938  
CGTCCGGA 0.482043071981  
CGTCCGGC -0.268134648722  
CGTCCGTA -0.1825794868  
CGTCCGTC -0.260533933354  
CGTCCTAA 0.52374441423  
CGTCCTAC 0.4395654264

CGTCCTAG 0.836616875176  
CGTCCTCA -0.688515711659  
CGTCCTCC -1.83144489254  
CGTCCTGA -0.917546628412  
CGTCCTGC -0.730790525124  
CGTCCTTA 0.213878625758  
CGTCCTTC -0.976993689831  
CGTCGAAA 2.01644712533  
CGTCGAAC -1.0231168245  
CGTCGAAG -0.798556055767  
CGTCGACA -0.393829920632  
CGTCGACC -0.930871862067  
CGTCGACG -1.1451470037  
CGTCGAGA -0.38564972227  
CGTCGAGC -1.64664967397  
CGTCGATA 1.1100824015  
CGTCGATC 0.758434242491  
CGTCGCAA -0.0900956215887  
CGTCGCAC -0.489642480441  
CGTCGCAG -0.733919262802  
CGTCGCCA -1.25094617007  
CGTCGCCC -0.228273955658  
CGTCGCGA -0.195888253415  
CGTCGCGC -0.461018843479  
CGTCGCTA 0.311342855859  
CGTCGCTC -0.483502104038  
CGTCGGAA 0.290562235002  
CGTCGGAC -0.72524374632  
CGTCGGAG -1.17024198915  
CGTCGGCA -0.76196812164  
CGTCGGCC -1.06555369456  
CGTCGGGA 0.985965090277  
CGTCGGGC -1.18737137052  
CGTCGGTA -0.542648576624  
CGTCGGTC -0.607568968618  
CGTCGTAA 1.19178296906  
CGTCGTAC -0.184391122628  
CGTCGTAG 0.279597015758  
CGTCGTCA -0.501620553362  
CGTCGTCC -0.657489455085  
CGTCGTGA 0.0425469117043  
CGTCGTGC -0.70826230693  
CGTCGTTA -0.377640990234  
CGTCGTTC -0.552166787365  
CGTCTAAA 0.269817162042  
CGTCTAAC 0.0533343914646  
CGTCTAAG -0.276217351749  
CGTCTACA 0.00290447227101  
CGTCTACC -0.944005764396  
CGTCTAGA -0.46502373226  
CGTCTAGC -0.62372914704  
CGTCTATA -0.732756114709  
CGTCTATC 0.29444688825  
CGTCTCAA -0.455863614303

CGTCTCAC -0.531162162482  
CGTCTCAG -0.701547152402  
CGTCTCCA -0.852771564584  
CGTCTCCC -1.13888508486  
CGTCTCGA -1.01746627721  
CGTCTCGC -0.102089377405  
CGTCTCTA 0.104311120953  
CGTCTCTC -0.572336298055  
CGTCTGAA 0.492028633012  
CGTCTGAC -0.805529978073  
CGTCTGAG -1.19407763807  
CGTCTGCA -0.839514812907  
CGTCTGCC -1.46567428601  
CGTCTGGA -0.403986686606  
CGTCTGGC -0.8529119265  
CGTCTGTA 1.08941757269  
CGTCTGTC -0.352340820238  
CGTCTTAA 0.293240612194  
CGTCTTAC 0.297443889605  
CGTCTTAG -0.900788147522  
CGTCTTCA -0.822257093172  
CGTCTTCC -0.277916854872  
CGTCTTGA 0.627097048877  
CGTCTTGC 0.0242661444111  
CGTCTTTA 0.490011028489  
CGTCTTTC 0.280873342081  
CGTGAAAA 0.449829881591  
CGTGAAAC 0.183321026382  
CGTGAAAG 0.0829395163119  
CGTGAACA 0.0822181031128  
CGTGAACC -0.505211413698  
CGTGAACG 0.560838121741  
CGTGAAGA -0.145715010947  
CGTGAAGC -1.00604494708  
CGTGAATA 0.700500057737  
CGTGAATC 2.87515675697  
CGTGACAA 0.0359326504715  
CGTGACAC -1.01085619808  
CGTGACAG -0.741954394379  
CGTGACCA -0.0718660850879  
CGTGACCC -0.757488563884  
CGTGACGA -0.858060882518  
CGTGACGC -0.339468299503  
CGTGACTA -0.287296533368  
CGTGACTC -0.97011569457  
CGTGAGAA 1.0673323963  
CGTGAGAC -0.264431132919  
CGTGAGAG 0.23429775587  
CGTGAGCA 0.350092938531  
CGTGAGCC -1.33749405928  
CGTGAGGA -0.0633432154568  
CGTGAGGC -0.769774805703  
CGTGAGTA 0.123219465453  
CGTGAGTC -0.565376751737

CGTGATAA 1.34648532473  
CGTGATAC 1.19463516501  
CGTGATAG 1.43929251898  
CGTGATCA 1.84490839706  
CGTGATCC 3.20236573695  
CGTGATGA -0.652689182114  
CGTGATGC -0.166366770678  
CGTGATTA 1.01008878172  
CGTGATTC 4.67530434022  
CGTGCAA 1.89352720319  
CGTGCAAC -1.03567856252  
CGTGCAAG -0.46946957179  
CGTGCACA 0.196470088843  
CGTGCACC -1.00584499016  
CGTGCACG 2.798761713  
CGTGCAGA -0.105293392982  
CGTGCAGC -0.646771502829  
CGTGCATA 0.413163271603  
CGTGCATC 0.25747968943  
CGTGCCAA -0.895145180292  
CGTGCCAC -0.528165161127  
CGTGCCAG -0.778226579541  
CGTGCCCA -1.31296208979  
CGTGCCCC -0.392302406597  
CGTGCCGA -0.700252790749  
CGTGCCGC -0.949318606673  
CGTGCCTA -0.738667520836  
CGTGCCTC -0.97850552097  
CGTGCGAA -0.725021310584  
CGTGCGAC 0.0620757761081  
CGTGCGAG -0.636364856051  
CGTGCGCA 0.657055300258  
CGTGCGCC -0.0844419377134  
CGTGCGGA 1.0702081166  
CGTGCGGC -0.537573068834  
CGTGCGTA -0.349936632338  
CGTGCGTC -0.129326385012  
CGTGCTAA -0.67492909641  
CGTGCTAC 0.26552187831  
CGTGCTAG 0.0705259816561  
CGTGCTCA -0.516279355909  
CGTGCTCC -0.627646995751  
CGTGCTGA 0.203033903428  
CGTGCTGC -0.0801369828625  
CGTGCTTA 2.28950149841  
CGTGCTTC 1.02423971983  
CGTGGA 0.809133384726  
CGTGGAAC -0.733824381284  
CGTGGAAG -0.774237373655  
CGTGGAACA -0.334898303716  
CGTGGAACC -0.994128821598  
CGTGGAAGA -0.268186140896  
CGTGGAAGC -0.786646203443  
CGTGGAATA 2.79650964919

CGTGGATC 2.10896418601  
CGTGGCAA -0.364685088771  
CGTGGCAC 0.337112205816  
CGTGGCAG -1.06885154613  
CGTGGCCA -1.23809090052  
CGTGGCCC -0.75355215708  
CGTGGCGA -0.442302353069  
CGTGGCGC -0.87814701248  
CGTGGCTA -0.221132226369  
CGTGGCTC -1.26169052187  
CGTGGGAA -0.318005734068  
CGTGGGAC -1.02644630325  
CGTGGGAG -0.948270989245  
CGTGGGCA -1.21419539521  
CGTGGGCC -0.390838146908  
CGTGGGGA 0.0180400348452  
CGTGGGGC -0.942438781741  
CGTGGGTA -0.720117530501  
CGTGGGTC -0.645369974723  
CGTGGTAA 0.753000903299  
CGTGGTAC 0.149091015613  
CGTGGTAG -0.613408233425  
CGTGGTCA -0.942832683803  
CGTGGTCC -0.931730239222  
CGTGGTGA -0.24638404077  
CGTGGTGC -1.15872264093  
CGTGGTTA 0.623506188541  
CGTGGTTC -0.279855522154  
CGTGTAAG 0.709195177839  
CGTGTAAC 0.899519662647  
CGTGTAAG 0.0350165079851  
CGTGTAACA -0.611599472796  
CGTGTAACC -0.391538388198  
CGTGTAGA -0.387651382516  
CGTGTAGC -1.22283823899  
CGTGATATA 0.41108659484  
CGTGATATC 2.92787428787  
CGTGATCAA -0.716452437792  
CGTGATCAC -0.331177798109  
CGTGATCAG -0.697983475751  
CGTGATCCA -0.067277269826  
CGTGATCCC -0.152431472383  
CGTGATCGA -0.329141635493  
CGTGATCGC -0.346067661985  
CGTGATCTA -0.0701292043967  
CGTGATCTC 0.620544473701  
CGTGATGAA -0.0247857710197  
CGTGATGAC -0.956288085492  
CGTGATGAG -0.786930063853  
CGTGATGCA 0.93459654978  
CGTGATGCC -0.732345484225  
CGTGATGGA -0.467324674431  
CGTGATGGC -0.507414337771  
CGTGATGTA -0.0643422159085

CGTGTGTC -0.751916953829  
CGTGTTAA 1.57692639518  
CGTGTTAC 0.318489290017  
CGTGTTAG -0.869618131072  
CGTGTTCA -0.41392363066  
CGTGTTCC -1.27236037991  
CGTGTTGA 0.752567271235  
CGTGTTGC 0.560135528017  
CGTGTTTA -0.250024824991  
CGTGTTTC 0.29861226533  
CGTTAAAA 1.58577599181  
CGTTAAAC 0.33934963226  
CGTTAAAG 0.577150947014  
CGTTAACA 0.528295590542  
CGTTAACC -0.267202561958  
CGTTAACG 1.30739518461  
CGTTAAGA 0.845418116204  
CGTTAAGC 0.384089274155  
CGTTAATA 1.29446934203  
CGTTAATC 0.164891794344  
CGTTACAA 2.58049161508  
CGTTACAC -0.0469294968886  
CGTTACAG 0.445763045372  
CGTTACCA 1.61550579568  
CGTTACCC 0.693478563981  
CGTTACGA 1.35279638332  
CGTTACGC -0.986797590654  
CGTTACTA 0.148213818984  
CGTTACTC -0.442375278534  
CGTTAGAA -1.16085107124  
CGTTAGAC -0.618424146211  
CGTTAGAG -0.71708837921  
CGTTAGCA -0.282142872482  
CGTTAGCC 0.126003179427  
CGTTAGGA 1.02997312509  
CGTTAGGC -1.11242751716  
CGTTAGTA 0.0108065606167  
CGTTAGTC -0.0661969796986  
CGTTATAA 1.29965280041  
CGTTATAC 1.02291399239  
CGTTATAG 0.0560025747747  
CGTTATCA 2.59406855921  
CGTTATCC 2.45143994213  
CGTTATGA 0.16228869505  
CGTTATGC 0.575642252454  
CGTTATTA 0.529864402868  
CGTTATTC 0.14359677451  
CGTTCAAA 1.25196033065  
CGTTCAAC -0.278664667612  
CGTTCAAG -0.19504451363  
CGTTCACA -0.674463314409  
CGTTCACC 0.386152097694  
CGTTCAGA -0.582608071931  
CGTTCAGC -0.50252545644

CGTTCATA -0.00468291263565  
CGTTCATC -1.04757560715  
CGTTCCAA 0.468947331366  
CGTTCCAC -0.65877257733  
CGTTCCAG 0.113757451755  
CGTTCCCA -0.468986015842  
CGTTCCCC -0.18012119291  
CGTTCCGA 0.628847521411  
CGTTCCGC -0.650934788856  
CGTTCCTA -0.745816830192  
CGTTCCTC -0.98135248929  
CGTTCGAA 0.591639328762  
CGTTCGAC -0.353702618342  
CGTTCGAG -0.961975748974  
CGTTCGCA -0.82625649294  
CGTTCGCC -0.565376751737  
CGTTCGGA 0.323148678309  
CGTTCGGC -0.773503675521  
CGTTCGTA 0.517003644305  
CGTTCGTC -0.759603140978  
CGTTCTAA -0.640992355789  
CGTTCTAC -0.533187085689  
CGTTCTAG -0.223163422735  
CGTTCTCA -0.114823365894  
CGTTCTCC -0.40639636352  
CGTTCTGA -0.0299679224996  
CGTTCTGC 0.195601779188  
CGTTCTTA 0.517065330362  
CGTTCTTC -0.877275043483  
CGTTGAAA 0.401288705794  
CGTTGAAC -0.198188411441  
CGTTGAAG -0.604880397544  
CGTTGACA -0.725832639051  
CGTTGACC -1.54230352788  
CGTTGAGA 1.55429519264  
CGTTGAGC -0.129326385012  
CGTTGATA 1.22181336176  
CGTTGATC 1.06640527579  
CGTTGCAA 0.22462872795  
CGTTGCAC -1.05144274783  
CGTTGCAG 0.529765077863  
CGTTGCCA -0.609430005567  
CGTTGCCC -1.68837088122  
CGTTGCGA 0.679053436579  
CGTTGCGC 0.0140510903413  
CGTTGCTA 0.11115252279  
CGTTGCTC -0.87004418307  
CGTTGGAA -0.304822692  
CGTTGGAC -0.930745353376  
CGTTGGAG -0.353107975216  
CGTTGGCA -0.468053667696  
CGTTGGCC -1.07098546546  
CGTTGGGA 0.625709373996  
CGTTGGGC -0.866595775702

CGTTGGTA 0.87060824455  
CGTTGGTC -0.785082618748  
CGTTGTAA -0.288396688497  
CGTTGTAC -0.281227252759  
CGTTGTAG -0.331969000194  
CGTTGTCA -0.916247039128  
CGTTGTCC -0.648681679517  
CGTTGTGA 0.0567548310019  
CGTTGTGC -0.641916862486  
CGTTGTTA 0.0359101716545  
CGTTGTTC 0.571580905249  
CGTTTAAA 0.768018844156  
CGTTTAAC -0.25629563081  
CGTTTAAG 1.68390151734  
CGTTTACA -0.275645971585  
CGTTTACC -0.470729953836  
CGTTTAGA 0.0764211821241  
CGTTTAGC 0.536679143783  
CGTTTATA 0.271930432228  
CGTTTATC 0.833381755188  
CGTTTCAA 0.808209400791  
CGTTTCAC -0.470302856311  
CGTTTCAG -0.193594368547  
CGTTTCCA 0.0466681152947  
CGTTTCCC -0.533110762264  
CGTTTCGA 1.27779581015  
CGTTTCGC -0.616035641207  
CGTTTCTA -0.373836581136  
CGTTTCTC 0.0683196596223  
CGTTTGAA -0.207450729601  
CGTTTGAC 0.0740933176492  
CGTTTGAG -0.298457527426  
CGTTTGCA 0.18067061702  
CGTTTGCC -0.21087299881  
CGTTTGGA 0.752803821577  
CGTTTGGC -0.432038682023  
CGTTTGTA 1.32200824537  
CGTTTGTC -0.624343916549  
CGTTTTAA 2.57748807919  
CGTTTTAC -0.0349992567999  
CGTTTTAG -0.0820492506032  
CGTTTTC A 0.325950688995  
CGTTTTC C 0.789573154531  
CGTTTTC G 0.94576277147  
CGTTTTC GC -0.288313307768  
CGTTTTC TA 0.0286346149893  
CGTTTTC TC 0.38699113261  
CTAAAAA 1.83878396493  
CTAAAAAC 1.07614069463  
CTAAAAAG 0.438452986336  
CTAAAACA 0.823886284647  
CTAAAACC 0.0745329614901  
CTAAAAGA 1.12847321045  
CTAAAAGC 0.92980960727



CTAAAATA 0.983578676325  
CTAAAATC 4.77223012423  
CTAAACAA 1.15634955743  
CTAAACAC -0.119716429332  
CTAAACAG 0.435433506164  
CTAAACCA 0.718579299821  
CTAAACCC -0.657596360157  
CTAAACGA 0.651944505953  
CTAAACGC 0.647618901956  
CTAAACTA 0.0504330557727  
CTAAACTC 0.568468895992  
CTAAAGAA 1.50743914398  
CTAAAGAC 0.0560227011575  
CTAAAGAG -0.260654430269  
CTAAAGCA -0.597669924895  
CTAAAGCC 0.0847728468112  
CTAAAGGA -0.550320126404  
CTAAAGGC -0.330763246901  
CTAAAGTA 0.185202451095  
CTAAAGTC 0.410162872287  
CTAAATAA 1.85287452389  
CTAAATAC 1.05925884163  
CTAAATAG 0.593557346898  
CTAAATCA 0.863527417172  
CTAAATCC 3.39856503447  
CTAAATGA 2.74805106998  
CTAAATGC 0.705733440009  
CTAAATTA 2.32363244556  
CTAAATTC 2.74494324282  
CTAACAAA 1.47177127307  
CTAACAAC -0.161246566636  
CTAACAAG -0.317474083906  
CTAACACA -0.470302856311  
CTAACACC -0.17468968339  
CTAACAGA 0.491815607013  
CTAACAGC -0.433809542321  
CTAACATA 2.27902166479  
CTAACATC 1.02223727544  
CTAACCAA -0.426417670847  
CTAACCCAC -1.10752138465  
CTAACCCAG -0.286087643497  
CTAACCCA 0.392625474247  
CTAACCCC -0.549349616546  
CTAACCGA -0.1145520518  
CTAACCGC -0.470447400333  
CTAACCTA 1.6088084151  
CTAACCTC -0.750954024037  
CTAACGAA 2.0885066328  
CTAACGAC -0.0362729693068  
CTAACGAG -0.767232608322  
CTAACGCA 0.263164477715  
CTAACGCC -0.0577951297454  
CTAACGGA 0.122007700383  
CTAACGGC -0.378898235701

CTAACGTA -0.300398024379  
CTAACGTC -0.636133271959  
CTAACTAA 1.08477752664  
CTAACTAC -1.1710606363  
CTAACTAG -1.32739924075  
CTAACTCA 0.218586108263  
CTAACTCC -0.735169712347  
CTAACTGA 0.0358139832279  
CTAACTGC -0.701269042386  
CTAACTTA 1.03956792064  
CTAACTTC -0.428021769688  
CTAAGAAA 1.37106251324  
CTAAGAAC 0.472241784975  
CTAAGAAG -0.795891793181  
CTAAGACA -0.19804726538  
CTAAGACC -0.914590925349  
CTAAGAGA 0.0272338710278  
CTAAGAGC -1.08374036448  
CTAAGATA 1.51936624749  
CTAAGATC 2.64293437095  
CTAAGCAA 0.0149055467716  
CTAAGCAC 1.64380061459  
CTAAGCAG -0.882352642325  
CTAAGCCA -0.763938416094  
CTAAGCCC -0.2819523253  
CTAAGCGA -0.484388971786  
CTAAGCGC -0.039986940374  
CTAAGCTA -0.748298648425  
CTAAGCTC -0.614362537624  
CTAAGGAA 0.50108733491  
CTAAGGAC -0.383344336612  
CTAAGGAG 0.323839771243  
CTAAGGCA -0.305128508465  
CTAAGGCC -0.448413454733  
CTAAGGGA 0.0657602110552  
CTAAGGGC -1.88036350336  
CTAAGGTA -0.0107281461385  
CTAAGGTC -1.38157318989  
CTAAGTAA 1.19663996184  
CTAAGTAC 0.366423537752  
CTAAGTAG -0.529833821222  
CTAAGTCA -0.0444970797761  
CTAAGTCC -0.670240956142  
CTAAGTGA 0.900456454279  
CTAAGTGC -0.696783211472  
CTAAGTTA 1.42734136836  
CTAAGTTC -0.0605636835876  
CTAATAAA 2.61999290846  
CTAATAAC 0.428736648347  
CTAATAAG 1.26107575236  
CTAATACA 1.12091875962  
CTAATACC 0.185600796644  
CTAATAGA 0.438529832525  
CTAATAGC 1.04692685803

CTAATATA 1.29336944828  
CTAATATC 2.93713765155  
CTAATCAA 0.166318676465  
CTAATCAC 0.0402647890082  
CTAATCAG -0.485577996657  
CTAATCCA 1.81681797854  
CTAATCCC 0.628184134926  
CTAATCGA -0.113082825861  
CTAATCGC 0.83032359054  
CTAATCTA 1.18441592884  
CTAATCTC 2.29253509319  
CTAATGAA 0.589471952586  
CTAATGAC -0.521032318812  
CTAATGAG -0.558842996035  
CTAATGCA -0.324212501396  
CTAATGCC -0.620576362255  
CTAATGGA 0.105636325633  
CTAATGGC -0.598746555681  
CTAATGTA 1.11660596332  
CTAATGTC 0.31683840387  
CTAATTAA 1.9797102037  
CTAATTAC 1.03205790468  
CTAATTAG 0.138455398559  
CTAATTCA 0.985767224411  
CTAATTCC 1.94365679493  
CTAATTGA 0.748450511131  
CTAATTGC 0.730864757496  
CTAATTTA 1.82580114116  
CTAATTTTC 0.760156747194  
CTACAAA 0.89135985205  
CTACAAAC -0.280512635481  
CTACAAAG 0.375496615638  
CTACAACA 0.579664392421  
CTACAACC 0.66205735982  
CTACAAGA 0.268711256518  
CTACAAGC -0.822502007725  
CTACAATA 0.70482017272  
CTACAATC 4.40677134595  
CTACACAA 1.27606102052  
CTACACAC -1.18153158295  
CTACACAG 0.417492273561  
CTACACCA -0.192699136588  
CTACACCC 0.18294515965  
CTACACGA 0.104731422555  
CTACACGC -0.541316576022  
CTACACTA -0.211705760568  
CTCACTC -0.385846281229  
CTACAGAA 0.116090021098  
CTACAGAC -0.0865769025721  
CTACAGAG -0.0412491520907  
CTACAGCA 0.0169414480062  
CTACAGCC -0.224157195555  
CTACAGGA -0.821598150174  
CTACAGGC -0.70074157433

CTACAGTA 0.0567882878459  
CTACAGTC 0.164856246447  
CTACATAA 0.57254697162  
CTACATAC 0.42398943584  
CTACATAG -0.389273516688  
CTACATCA 0.589376286922  
CTACATCC -0.541469745636  
CTACATGA 2.71581644629  
CTACATGC -0.215826441395  
CTACATTA 0.101805255612  
CTACATTC -0.050250088657  
CTACCAA 0.0727506004015  
CTACCAAC 0.127542194252  
CTACCAAG -0.528409291535  
CTACCACA 0.319881408386  
CTACCACC -0.608953768303  
CTACCAGA 1.00531490829  
CTACCAGC -0.459402459703  
CTACCATA -0.724182537049  
CTACCATC 0.068274179225  
CTACCCAA 4.07755286431E-5  
CTACCCAC -1.35576567822  
CTACCCAG 0.369236003702  
CTACCCCA -0.0566528921803  
CTACCCCC -0.836968433419  
CTACCCGA -0.235401308959  
CTACCCGC -0.734341655458  
CTACCCTA -0.360805663155  
CTACCCTC -1.09325073377  
CTACCGAA 0.325275278957  
CTACCGAC -0.342851100091  
CTACCGAG 1.13947267068  
CTACCGCA -0.452036726388  
CTACCGCC -1.07850881187  
CTACCGGA 0.358732122971  
CTACCGGC -0.427330676754  
CTACCGTA 0.78928772583  
CTACCGTC -1.31113398693  
CTACCTAA -0.648919014004  
CTACCTAC 0.957625313726  
CTACCTAG -0.59612097757  
CTACCTCA 0.265837104512  
CTACCTCC -0.34264434725  
CTACCTGA -0.290198391823  
CTACCTGC -0.663295001667  
CTACCTTA -0.541783926312  
CTACCTTC -0.635453679815  
CTACGAAA 0.753037758104  
CTACGAAC -0.733422637774  
CTACGAAG -0.523450098555  
CTACGACA -0.735101753133  
CTACGACC -0.444587089581  
CTACGAGA 0.693367215422  
CTACGAGC 0.119618672616

CTACGATA 1.40794162646  
CTACGATC 3.03616677326  
CTACGCAA 0.575877495889  
CTACGCAC 0.275391647294  
CTACGCAG 0.956237116081  
CTACGCCA -0.475683657803  
CTACGCCC -0.253772252903  
CTACGCGA 0.874558243196  
CTACGCGC 0.0998801801733  
CTACGCTA 0.16226569347  
CTACGCTC -0.998508008822  
CTACGGAA 1.38987022583  
CTACGGAC -1.22159458537  
CTACGGAG -0.535611138591  
CTACGGCA -0.728150571026  
CTACGGCC -1.21718873722  
CTACGGGA -0.468146719544  
CTACGGGC -0.888155313709  
CTACGGTA 0.212310858958  
CTACGGTC -0.236907912466  
CTACGTAA -0.0594765975388  
CTACGTAC -0.766802374218  
CTACGTAG 0.624532372678  
CTACGTCA 0.317547270752  
CTACGTCC 0.327240868542  
CTACGTGA -0.55623310082  
CTACGTGC -0.281127666371  
CTACGTTA 0.443440147147  
CTACGTTC 0.637435997823  
CTACTAAA 1.19162718563  
CTACTAAC 0.251621082385  
CTACTAAG -0.74889799642  
CTACTACA 0.23251356511  
CTACTACC -0.792217552116  
CTACTAGA 0.411933209823  
CTACTAGC -0.468488345287  
CTACTATA 2.31052259034  
CTACTATC 1.12390530571  
CTACTCAA 0.00893088629911  
CTACTCAC 0.335574236518  
CTACTCAG -0.656817965771  
CTACTCCA 0.809529639222  
CTACTCCC -0.350806510282  
CTACTCGA 1.95618167814  
CTACTCGC 0.17358926688  
CTACTCTA -0.885608934221  
CTACTCTC -0.862178165384  
CTACTGAA 1.96468677383  
CTACTGAC -0.0725841003262  
CTACTGAG -1.68473401772  
CTACTGCA -0.287478977721  
CTACTGCC -0.585253253661  
CTACTGGA 0.596077849607  
CTACTGGC -0.431501804229

CTACTGTA 0.649751252999  
CTACTGTC 0.0507393950007  
CTACTTAA 1.15371273992  
CTACTTAC 0.111507478995  
CTACTTCA 0.611374946006  
CTACTTCC 0.365373567889  
CTACTTGA -0.0041355795781  
CTACTTGC -0.793332344614  
CTACTTTA 0.459289281472  
CTACTTTC 0.416135180326  
CTAGAAAA 2.20680088488  
CTAGAAAC -0.625325665816  
CTAGAAAG 0.191770709167  
CTAGAACA 0.344294972016  
CTAGAACC -0.485664252583  
CTAGAAGA 0.737867693159  
CTAGAAGC -1.15076174172  
CTAGAATA 0.902487912027  
CTAGAATC 5.74038467271  
CTAGACAA -0.198045697091  
CTAGACAC -0.355266464418  
CTAGACAG -0.359101716545  
CTAGACCA -0.465142660885  
CTAGACCC -1.43098790297  
CTAGACGA 0.159777340697  
CTAGACGC -0.171784688356  
CTAGACTA -1.34086169974  
CTAGACTC -0.624751149072  
CTAGAGAA 1.10327550204  
CTAGAGAC 0.190312199873  
CTAGAGAG -0.849392946102  
CTAGAGCA -0.610182000412  
CTAGAGCC -0.77732768824  
CTAGAGGA 0.274502949875  
CTAGAGGC -0.317496562723  
CTAGAGTA 0.797211247466  
CTAGAGTC -1.01983308754  
CTAGATAA 1.24086990963  
CTAGATAC 3.84764370535  
CTAGATAG 0.503834716843  
CTAGATCA 1.57268704711  
CTAGATCC 3.85589238569  
CTAGATGA 0.0746921428807  
CTAGATGC 0.241698514319  
CTAGATTA 2.6267433495  
CTAGATTC 21.0535712001  
CTAGCAAA 1.1413938254  
CTAGCAAC -0.485881722069  
CTAGCAAG -0.398155263247  
CTAGCACA 0.939965066336  
CTAGCACC -0.607640064412  
CTAGCAGA 1.46171357072  
CTAGCAGC -1.67389243197  
CTAGCATA 0.925484264655

CTAGCATC 0.131174614262  
CTAGCCAA 0.179598691104  
CTAGCCAC -0.909007291741  
CTAGCCAG -1.03815959661  
CTAGCCCA -0.506478068902  
CTAGCCCC -0.942522162469  
CTAGCCGA 0.1763510248  
CTAGCCGC -1.03815959661  
CTAGCCTA -0.528615521613  
CTAGCCTC -0.619906702612  
CTAGCGAA 0.380117319455  
CTAGCGAC -0.469532826136  
CTAGCGAG -0.107117575126  
CTAGCGCA -0.724745291621  
CTAGCGCC -1.08605725092  
CTAGCGGA 0.229403124144  
CTAGCGGC -0.381817345341  
CTAGCGTA 0.457251550567  
CTAGCGTC -0.814438646936  
CTAGCTAA -0.62929997295  
CTAGCTAC 0.0705978615945  
CTAGCTAG 0.323626745244  
CTAGCTCA -0.557542361224  
CTAGCTCC -0.531699301657  
CTAGCTGA -0.185732532967  
CTAGCTGC -0.859110590999  
CTAGCTTA -0.106653622797  
CTAGCTTC -1.07341945086  
CTAGGAAA 1.59648479571  
CTAGGAAC -0.544775177272  
CTAGGAAG 0.0240693240709  
CTAGGACA 0.183505561788  
CTAGGACC -0.989150547762  
CTAGGAGA -0.0962485443082  
CTAGGAGC 0.415359661137  
CTAGGATA 1.60332436788  
CTAGGATC 1.84650596136  
CTAGGCAA -0.293710837682  
CTAGGCAC -0.76332939698  
CTAGGCAG -0.267221642815  
CTAGGCCA -1.14178798884  
CTAGGCCC -1.472888418  
CTAGGCCGA -0.0358722713234  
CTAGGCCGC -0.614370640454  
CTAGGCTA -0.955580786899  
CTAGGCTC 0.0798886703483  
CTAGGGAA 0.132934496533  
CTAGGGAC -0.0274842745947  
CTAGGGAG -0.864630970261  
CTAGGGCA -0.017811064569  
CTAGGGCC -0.805417322606  
CTAGGGGA -0.760240127923  
CTAGGGGC -1.32103747413  
CTAGGGTA -0.183177789269

CTAGGGTC 0.0507393950007  
CTAGGTAA -0.114817092736  
CTAGGTAC -0.509856426003  
CTAGGTCA -1.10135539285  
CTAGGTCC -0.795122285768  
CTAGGTGA 0.547621622829  
CTAGGTGC -0.124730773828  
CTAGGTTA -0.235132085918  
CTAGGTTC -0.0932651347959  
CTAGTAAA 0.723563846816  
CTAGTAAC -0.323130381597  
CTAGTAAG -0.588131065009  
CTAGTACA -0.242400846662  
CTAGTACC -0.42326462468  
CTAGTAGA 0.266551199027  
CTAGTAGC -0.541031408703  
CTAGTATA 1.97071266509  
CTAGTATC 1.84910540131  
CTAGTCAA -0.266679276008  
CTAGTCAC -0.0958873149455  
CTAGTCAG 0.0838255999151  
CTAGTCCA -0.271614683263  
CTAGTCCC -1.5685462399  
CTAGTCGA 0.185621968553  
CTAGTCGC -1.01144901153  
CTAGTCTA 0.00457496203739  
CTAGTCTC -0.459704094062  
CTAGTGAA -0.158968626045  
CTAGTGAC -0.88909681021  
CTAGTGAG -0.556103716931  
CTAGTGCA 1.27525256725  
CTAGTGCC -1.18867200533  
CTAGTGGA 0.149075071336  
CTAGTGGC -1.12253252958  
CTAGTGTA 1.07433742302  
CTAGTGTC -0.0534256136408  
CTAGTTAA 0.160862335693  
CTAGTTAC 0.581776355699  
CTAGTTCA -0.544775177272  
CTAGTTCC 0.150010033297  
CTAGTTGA 0.799338893641  
CTAGTTGC 0.367696727496  
CTAGTTTA 0.638333059453  
CTAGTTTC 0.678858707292  
CTATAAAA 0.880923930533  
CTATAAAC 0.733831438587  
CTATAAAG -0.178810625599  
CTATAACA 1.36697084577  
CTATAACC 0.502641509867  
CTATAAGA 2.01815211747  
CTATAAGC 0.142942274999  
CTATAATA 2.38232123897  
CTATAATC 2.33770235537  
CTATACAA 1.30553101108



CTATACAC 0.123062636496  
CTATACAG 0.0854283918486  
CTATACCA 0.789084109568  
CTATACCC -0.201153001479  
CTATACGA -0.175186308418  
CTATACGC -0.160045518212  
CTATACTA -0.00640071247052  
CTATACTC -0.0325927164652  
CTATAGAA 0.768461885957  
CTATAGAC -0.940467180378  
CTATAGAG -0.214402957235  
CTATAGCA 0.145382794941  
CTATAGCC -0.819984902977  
CTATAGGA -0.307604314922  
CTATAGGC -1.12548248225  
CTATAGTA 0.660182469647  
CTATAGTC -0.731345699629  
CTATATAA 1.66752334667  
CTATATAC 1.47567997342  
CTATATAG 1.11896101148  
CTATATCA 2.18568883216  
CTATATCC 1.87245331218  
CTATATGA 0.428301447994  
CTATATGC 0.530493809746  
CTATATTA 2.21321518919  
CTATATTC 2.18006991204  
CTATCAAA -0.176740483375  
CTATCAAC 1.20584738986  
CTATCAAG 0.297781071861  
CTATCACA 0.695003202818  
CTATCACC 0.121687507931  
CTATCAGA 1.29883964228  
CTATCAGC 0.425228123213  
CTATCATA 0.972592546554  
CTATCATC 0.367942687576  
CTATCCAA 0.308594428399  
CTATCCAC 0.276958368568  
CTATCCAG 0.208917080343  
CTATCCCA 0.808172545987  
CTATCCCC 0.150953098088  
CTATCCGA 1.00106222976  
CTATCCGC 0.965045937176  
CTATCCTA 0.614022480171  
CTATCCTC -0.364598571464  
CTATCGAA 0.356734906212  
CTATCGAC -0.525149601678  
CTATCGAG -0.326971645501  
CTATCGCA 0.279089674084  
CTATCGCC -0.778302902966  
CTATCGGA 0.620577930545  
CTATCGGC 0.536400511004  
CTATCGTA 0.418229892419  
CTATCGTC 0.216559878147  
CTATCTAA 1.63438460406

CTATCTAC 1.29491159968  
CTATCTCA 1.78104215703  
CTATCTCC 1.06104120272  
CTATCTGA 2.79644064445  
CTATCTGC -0.639980286257  
CTATCTTA 1.51332990096  
CTATCTTC 0.0216612154466  
CTATGAAA 1.03386509702  
CTATGAAC -0.272084647369  
CTATGAAG 0.511223190357  
CTATGACA -0.635691014302  
CTATGACC -0.624479312215  
CTATGAGA 0.461283623034  
CTATGAGC -0.863748546  
CTATGATA 1.54160407073  
CTATGATC 1.62305475749  
CTATGCAA 0.825566445532  
CTATGCAC -0.443054347914  
CTATGCAG -0.431796381285  
CTATGCCA -0.630010669504  
CTATGCCC -0.94861784262  
CTATGCGA 0.57127613431  
CTATGCGC 0.484981001096  
CTATGCTA -0.491736931153  
CTATGCTC -0.61935544883  
CTATGGAA 2.01960330808  
CTATGGAC -1.02654275305  
CTATGGAG -0.224542994787  
CTATGGCA -0.5004953056  
CTATGGCC -0.547811908629  
CTATGGGA 0.457789473887  
CTATGGGC -0.57359824839  
CTATGGTA 0.407111503561  
CTATGGTC -0.315300434572  
CTATGTAA 0.550380244171  
CTATGTAC -0.444910679994  
CTATGTCA 1.33870451745  
CTATGTCC 0.293194347652  
CTATGTGA -0.123056886101  
CTATGTGC -0.67778756552  
CTATGTTA 1.78136862264  
CTATGTTC -0.720472225324  
CTATTA AAA -0.0572995502435  
CTATTAAC 0.727312320254  
CTATTAAG -0.753521575434  
CTATTACA 1.74513669024  
CTATTACC 0.132067755168  
CTATTAGA 2.96149031327  
CTATTAGC -0.179429577213  
CTATTATA 0.752777944799  
CTATTATC 0.0287849094058  
CTATTCAA 1.03166896887  
CTATTCAC -0.129797917407  
CTATTCAG 0.67678229191

CTATTCCA 0.385942469655  
CTATTCCC 0.352682184599  
CTATTCGA 0.998284527559  
CTATTCGC 1.79691324741  
CTATTCTA -0.360757046179  
CTATTCTC 0.287639466019  
CTATTGAA 0.464544619799  
CTATTGAC 0.473814256643  
CTATTGAG -0.175161477167  
CTATTGCA 0.957946551705  
CTATTGCC -0.365424798682  
CTATTGGA 0.653214820499  
CTATTGGC -0.633372559564  
CTATTGTA 1.77018959325  
CTATTGTC 0.223305091559  
CTATTTAA -0.427526451568  
CTATTTAC 0.247666901633  
CTATTTCA -0.339121968891  
CTATTTCC 0.671884262223  
CTATTTGA 0.972078408958  
CTATTTGC 1.83265718037  
CTATTTTA 0.927589432012  
CTATTTTC 2.40899941273  
CTCAAAAA 2.31555026529  
CTCAAAAC 0.563475462023  
CTCAAAAG -0.590964441486  
CTCAAACA -0.273472060869  
CTCAAACC -1.04362665403  
CTCAAAGA 0.561427798617  
CTCAAAGC 0.957054979088  
CTCAAATA -0.21181920018  
CTCAAATC 2.99616179755  
CTCAACAA 0.143489869438  
CTCAACAC 0.314784990068  
CTCAACAG -0.257964029523  
CTCAACCA -0.722241255951  
CTCAACCC -0.123355383881  
CTCAACGA 0.952665859364  
CTCAACGC -0.691199055101  
CTCAACTA -0.151631383324  
CTCAACTC -0.866753911566  
CTCAAGAA 1.51758780713  
CTCAAGAC -0.374577859336  
CTCAAGAG -0.413459155568  
CTCAAGCA -0.398058029294  
CTCAAGCC -0.838940296164  
CTCAAGGA -0.105046910139  
CTCAAGGC -0.507896586812  
CTCAAGTA 0.888861044012  
CTCAAGTC -0.740551559365  
CTCAATAA 0.334529494287  
CTCAATAC 0.767057744035  
CTCAATCA 0.268258804979  
CTCAATCC 0.529454556529

CTCAATGA 0.261782030465  
CTCAATGC 0.0870162850314  
CTCAATTA 0.791150069686  
CTCAATTC -0.195578516226  
CTCACAAA -0.49725966285  
CTCACAAC 0.957984452036  
CTCACAAAG -0.498079355528  
CTCACACA 0.475339418244  
CTCACACC 0.316801810447  
CTCACAGA 0.508924600621  
CTCACAGC -1.39449119102  
CTCACATA -0.277158064105  
CTCACATC -0.0322137131541  
CTCACCAA 0.121650130363  
CTCACCCAC -0.318753285426  
CTCACCCAG -1.03976552512  
CTCACCCA -0.382299855763  
CTCACCCC -1.29053816285  
CTCACCGA 0.306176125893  
CTCACCGC -0.394504807907  
CTCACCTA 0.270026528699  
CTCACCTC -0.25308795589  
CTCACGAA -0.324506294307  
CTCACGAC 0.208128492074  
CTCACGAG 0.825603038955  
CTCACGCA -0.0160558871662  
CTCACGCC -0.381817345341  
CTCACGGA -0.869567945806  
CTCACGGC -0.874756631826  
CTCACGTA 0.134864538222  
CTCACGTC -0.336311332613  
CTCACTAA -0.717912515376  
CTCACTAC -0.0770887507149  
CTCACTCA 0.0116202415184  
CTCACTCC 0.0805379422275  
CTCACTGA -0.353383210034  
CTCACTGC -0.311668275943  
CTCACTTA -0.295586511999  
CTCACTTC -0.368915549868  
CTCAGAAA -0.0733457662907  
CTCAGAAC 0.800016917495  
CTCAGAAG -0.218823965513  
CTCAGACA -0.108988283193  
CTCAGACC -0.690070409379  
CTCAGAGA 0.348620314631  
CTCAGAGC -1.17445232386  
CTCAGATA 1.16993957064  
CTCAGATC 2.14366625193  
CTCAGCAA 0.824678793639  
CTCAGCAC 0.240953576776  
CTCAGCAG -0.0509268056035  
CTCAGCCA -0.853029025454  
CTCAGCCC -0.0445085805662  
CTCAGCGA -0.0181030278094

CTCAGCGC -0.358814458173  
CTCAGCTA -0.273749125358  
CTCAGCTC -0.31337980262  
CTCAGGAA -0.00830879810572  
CTCAGGAC -0.882352642325  
CTCAGGAG -0.98542925801  
CTCAGGCA 0.0559879374055  
CTCAGGCC -0.922677026337  
CTCAGGGA -0.372519217903  
CTCAGGGC -0.182869358988  
CTCAGGTA 0.0732568965488  
CTCAGGTC -0.450659768151  
CTCAGTAA 0.641165390404  
CTCAGTAC -0.766834001391  
CTCAGTCA -0.701463510292  
CTCAGTCC -1.49306237218  
CTCAGTGA -0.0467073225338  
CTCAGTGC -0.488493969718  
CTCAGTTA -0.00880019550218  
CTCAGTTC -0.358194722414  
CTCATAAA -0.255632767088  
CTCATAAC -0.341806096479  
CTCATAAG -0.825738696002  
CTCATACA 0.90212929648  
CTCATACC 0.26288819737  
CTCATAGA 0.808953554189  
CTCATAGC -0.077558453439  
CTCATATA 0.930843110092  
CTCATATC 1.78712973435  
CTCATCAA 0.176407221843  
CTCATCAC 0.477147133347  
CTCATCAG 0.899832275033  
CTCATCCA -0.403986686606  
CTCATCCC -1.16679227487  
CTCATCGA -0.0907072545183  
CTCATCGC -0.0485751554035  
CTCATCTA -0.35216569457  
CTCATCTC -0.750866461203  
CTCATGAA 0.247368403853  
CTCATGAC 0.0413432494645  
CTCATGAG -0.868902991031  
CTCATGCA -0.0555117001415  
CTCATGCC 0.247677356897  
CTCATGGA -0.816474025408  
CTCATGGC -0.848921413707  
CTCATGTA 1.2125539188  
CTCATGTC -0.0253796300009  
CTCATTAA 0.583641574753  
CTCATTAC 0.680103929205  
CTCATTCA -0.884815902466  
CTCATTCC 0.151069151515  
CTCATTGA 0.866769071699  
CTCATTGC 0.30266943043  
CTCATTTA 1.23057252035

CTCATTTTC 0.0113335059099  
CTCCAAAA 0.028468114914  
CTCCAAAC -0.16011400019  
CTCCAAAG -1.42504643796  
CTCCAACA 1.11021988822  
CTCCAACC -0.512244931008  
CTCCAAGA -0.143629708591  
CTCCAAGC -0.64208806743  
CTCCAATA 0.139556860595  
CTCCAATC 0.0323896229667  
CTCCACAA -0.571248689243  
CTCCACAC -0.715266549501  
CTCCACAG -1.56190923847  
CTCCACCA -1.26549127162  
CTCCACCC -0.0663951069467  
CTCCACGA 0.332696947933  
CTCCACGC -1.02929771505  
CTCCACTA 0.660686151978  
CTCCACTC -0.735864464624  
CTCCAGAA -0.635734403647  
CTCCAGAC -1.00316948817  
CTCCAGAG -1.07195362288  
CTCCAGCA -0.715091423833  
CTCCAGCC -0.900905507857  
CTCCAGGA -0.870262698083  
CTCCAGGC -0.478334589928  
CTCCAGTA -0.679561823779  
CTCCAGTC 0.0731732544388  
CTCCATAA 0.218974521312  
CTCCATAC -0.956191897065  
CTCCATCA -0.330053595874  
CTCCATCC -0.766639272103  
CTCCATGA -0.773125979118  
CTCCATGC -1.08109413722  
CTCCATTA 0.701860810315  
CTCCATTC -0.0679830001294  
CTCCCAA -0.342848486275  
CTCCCAAC -0.76298332775  
CTCCCAAG -0.854403631256  
CTCCCACA -0.326224094142  
CTCCCACC -0.71152251955  
CTCCCAGA -1.0108530615  
CTCCCAGC -1.11378042829  
CTCCCATA -0.890844407546  
CTCCCATC -0.80561649538  
CTCCCCAA -0.627372545077  
CTCCCCAC -0.375325672076  
CTCCCCAG -0.760724468016  
CTCCCCCA -1.16725047681  
CTCCCCCC -1.23217635781  
CTCCCCGA -1.00980831927  
CTCCCCGC -0.772858324366  
CTCCCCTA -0.621458263753  
CTCCCCTC -1.34140406655

CTCCCGAA -0.0522789325886  
CTCCCGAC -0.367507748603  
CTCCCGAG -1.06606155899  
CTCCCGCA 0.0104406263853  
CTCCCGCC -0.600011381213  
CTCCCGGA 0.613653670742  
CTCCCGGC -0.758064910298  
CTCCCGTA -0.320863157652  
CTCCCGTC -1.32476555981  
CTCCCTAA -0.781660088158  
CTCCCTAC -1.11735168501  
CTCCCTCA -0.908346519072  
CTCCCTCC -0.0443094077917  
CTCCCTGA -0.804728059343  
CTCCCTGC -0.386744388385  
CTCCCTTA -0.0944774226282  
CTCCCTTC -1.48147506474  
CTCCGAAA 0.275477119075  
CTCCGAAC -0.894148270893  
CTCCGAAG -0.564801189467  
CTCCGACA -0.692586468601  
CTCCGACC -1.17610268725  
CTCCGAGA 0.0748492332186  
CTCCGAGC -0.892273903483  
CTCCGATA 0.11135744596  
CTCCGATC 1.77454891548  
CTCCGCAA 0.0301456619834  
CTCCGCAC -0.172806429006  
CTCCGCAG -0.894293076296  
CTCCGCCA 0.0573837151167  
CTCCGCCC -0.475728092674  
CTCCGCGA 0.632126814888  
CTCCGCGC 0.21456292277  
CTCCGCTA -1.3694299238  
CTCCGCTC -0.896239846407  
CTCCGGAA -0.890194351523  
CTCCGGAC -0.524370684528  
CTCCGGAG 2.13818429577  
CTCCGGCA -0.725805455365  
CTCCGGCC -1.23561143472  
CTCCGGGA 0.297253081042  
CTCCGGGC -1.04966509161  
CTCCGGTA -0.262876435198  
CTCCGGTC -0.114535061996  
CTCCGTAA -0.198817818319  
CTCCGTAC -0.794556394618  
CTCCGTCA -0.632985192042  
CTCCGTCC -1.21834456663  
CTCCGTGA -0.159432316993  
CTCCGTGC -0.543511135884  
CTCCGTTA 0.728649287107  
CTCCGTTC 0.196377559759  
CTCCTAAA 0.380916101605  
CTCCTAAC -0.111832114934

CTCCTAAG -0.218997000129  
CTCCTACA -0.797968208562  
CTCCTACC -0.875329057516  
CTCCTAGA 0.112367424439  
CTCCTAGC -0.545724515221  
CTCCTATA 1.67726686834  
CTCCTATC -0.154836183046  
CTCCTCAA -0.105257060941  
CTCCTCAC -0.862577033697  
CTCCTCAG -1.21819714741  
CTCCTCCA -1.20199619346  
CTCCTCCC -1.59366448831  
CTCCTCGA 0.100786651541  
CTCCTCGC -0.17058494684  
CTCCTCTA -0.214402957235  
CTCCTCTC -0.958270664881  
CTCCTGAA 0.379923897075  
CTCCTGAC -0.244875346211  
CTCCTGCA -0.589073607036  
CTCCTGCC -1.47680809638  
CTCCTGGA -0.357313605061  
CTCCTGGC -0.96772797371  
CTCCTGTA 0.0386382113496  
CTCCTGTC -0.602692633603  
CTCCTTAA 0.471972561933  
CTCCTTAC -0.464582781511  
CTCCTTCA -1.35687655  
CTCCTTCC -1.02939756282  
CTCCTTGA -0.256193169225  
CTCCTTGC 0.033995812861  
CTCCTTTA -0.0156073563512  
CTCCTTTC -0.648234716991  
CTCGAAAA 1.51037158408  
CTCGAAAC 0.536606218319  
CTCGAAAG 0.0181383143245  
CTCGAACA 0.571580905249  
CTCGAACC -0.486040119315  
CTCGAAGA -0.0228860495955  
CTCGAAGC -0.830167284347  
CTCGAATA 1.00782809231  
CTCGAATC 3.02546554942  
CTCGACAA -0.0985215186484  
CTCGACAC -0.748449988368  
CTCGACAG -0.624343916549  
CTCGACCA -0.373888596073  
CTCGACCC -1.15845158821  
CTCGACGA -0.427537168213  
CTCGACGC -1.19102522382  
CTCGACTA 0.196905027815  
CTCGACTC -0.25654498885  
CTCGAGAA 1.13947267068  
CTCGAGAC -0.54949781991  
CTCGAGAG -0.767087018774  
CTCGAGCA 0.478268721766



CTCGAGCC -0.650042954858  
CTCGAGGA 0.998612038696  
CTCGAGGC -0.653113927204  
CTCGAGTA 0.986077745744  
CTCGAGTC -0.298526793549  
CTCGATAA 0.866753911566  
CTCGATAC 1.78959613107  
CTCGATCA 0.69535606797  
CTCGATCC 0.0157163524758  
CTCGATGA 1.84187244984  
CTCGATGC 1.39841714256  
CTCGATTA 1.74624337991  
CTCGATTC 3.51127591432  
CTCGCAA 0.533786695066  
CTCGCAAC 0.196364490679  
CTCGCAAG -0.42867470091  
CTCGCACA -0.222582632833  
CTCGCACC -0.552986218661  
CTCGCAGA -0.691185201877  
CTCGCAGC -0.255912445393  
CTCGCATA 0.135791397354  
CTCGCATC -0.333571530746  
CTCGCCAA -0.807990101634  
CTCGCCAC -0.252821346664  
CTCGCCAG 0.447154118214  
CTCGCCCA -0.754659892275  
CTCGCCCC -0.689338018153  
CTCGCCGA -0.732756114709  
CTCGCCGC -0.979171521271  
CTCGCCTA 0.0430788232478  
CTCGCCTC -0.791074007643  
CTCGCGAA 0.231057146869  
CTCGCGAC -0.196967759398  
CTCGCGAG -0.592796726459  
CTCGCGCA -0.107391764418  
CTCGCGCC -0.893394969139  
CTCGCGGA 0.469576738244  
CTCGCGGC -1.21064949251  
CTCGCGTA 0.598373302765  
CTCGCGTC -0.646404523071  
CTCGCTAA 0.616293363458  
CTCGCTAC -1.03670945153  
CTCGCTCA -0.735021770365  
CTCGCTCC -1.14151615198  
CTCGCTGA -1.20265199988  
CTCGCTGC 0.473858168751  
CTCGCTTA -0.100148096307  
CTCGCTTC -0.346976224405  
CTCGGAAA 0.569933155681  
CTCGGAAC -0.00893297735186  
CTCGGAAG -0.49561975473  
CTCGGACA 0.125513873083  
CTCGGACC -0.814076110666  
CTCGGAGA 1.11972346159

CTCGGAGC -0.795216905905  
CTCGGATA 2.21615730041  
CTCGGATC 2.66545710013  
CTCGGCAA -0.238055377664  
CTCGGCAC -0.124050658921  
CTCGGCAG 0.108709127651  
CTCGGCCA -0.606893035817  
CTCGGCCC -0.58587795567  
CTCGGCGA -0.584068672277  
CTCGGCGC -0.86615430219  
CTCGGCTA -0.294846279325  
CTCGGCTC -0.945248895256  
CTCGGGAA -0.458038831927  
CTCGGGAC -0.525442871826  
CTCGGGCA -0.90033517322  
CTCGGGCC -0.353383210034  
CTCGGGGA -0.969352983079  
CTCGGGGC -0.273659471472  
CTCGGGTA -0.310747428588  
CTCGGGTC -1.51171351719  
CTCGGTAA 0.679789748529  
CTCGGTAC -0.886925251928  
CTCGGTCA 0.144247614679  
CTCGGTCC -0.913435095941  
CTCGGTGA -0.524206275506  
CTCGGTGC -0.0995309743639  
CTCGGTTA -0.280062536376  
CTCGGTTC 0.802305051968  
CTCGTAAA 1.21157321506  
CTCGTAAC 0.395664035276  
CTCGTAAG -0.0883362620804  
CTCGTACA -0.3714201083  
CTCGTACC 0.395013456489  
CTCGTAGA -0.471814948832  
CTCGTAGC -0.285034275673  
CTCGTATA -0.220263132569  
CTCGTATC 1.34459370614  
CTCGTCAA -0.0716073173099  
CTCGTCAC -0.958200353232  
CTCGTCAG -0.186936979352  
CTCGTCCA -0.581961413867  
CTCGTCCC -0.629803655282  
CTCGTCGA -0.829634065896  
CTCGTCGC 0.625709373996  
CTCGTCTA -0.218823965513  
CTCGTCTC -0.46034003548  
CTCGTGAA -0.500069253602  
CTCGTGAC -0.826904196529  
CTCGTGCA -0.636459998951  
CTCGTGCC -0.66683123325  
CTCGTGGA -0.579486391555  
CTCGTGGC -1.13694798587  
CTCGTGTA 0.56018205394  
CTCGTGTC -0.992066520823

CTCGTTAA -0.954799255933  
CTCGTTAC 0.850456246426  
CTCGTTCA -0.187838223087  
CTCGTTCC -0.418759974291  
CTCGTTGA -0.52195865518  
CTCGTTGC -0.660011526085  
CTCGTTTA 1.25373145233  
CTCGTTTC 0.105049262574  
CTCTAAAA 1.15874538112  
CTCTAAAC 0.486930123642  
CTCTAAAG 0.195779518672  
CTCTAACA 0.269892178559  
CTCTAACC -0.616582974264  
CTCTAAGA -0.381220349781  
CTCTAAGC -0.485932168717  
CTCTAATA 0.622726487246  
CTCTAATC 1.14426484082  
CTCTACAA 1.49904147613  
CTCTACAC 0.840371883153  
CTCTACAG -0.467779478404  
CTCTACCA -1.01638128221  
CTCTACCC -0.729659788348  
CTCTACGA -0.103991712645  
CTCTACGC -0.596513572724  
CTCTACTA -0.633372559564  
CTCTACTC 0.229847734235  
CTCTAGAA 1.43278202624  
CTCTAGAC -0.296065101698  
CTCTAGAG -0.317496562723  
CTCTAGCA -0.255210635814  
CTCTAGCC -0.963780327498  
CTCTAGGA 1.36157488415  
CTCTAGGC -0.626669689971  
CTCTAGTA 0.427581603084  
CTCTAGTC -0.704410587763  
CTCTATAA 0.0551593577529  
CTCTATAC 1.29082594399  
CTCTATCA 0.387000280966  
CTCTATCC -0.244788567521  
CTCTATGA 0.562113141156  
CTCTATGC -0.114964250574  
CTCTATTA 1.19912779185  
CTCTATTC 0.66853517986  
CTCTCAA 0.164722157689  
CTCTCAAC -0.128753959321  
CTCTCAAG -0.572336298055  
CTCTCACA -0.263144351332  
CTCTCACC -1.35739722213  
CTCTCAGA 0.569541867435  
CTCTCAGC -0.458701695649  
CTCTCATA 0.585760333953  
CTCTCATC -0.685700631893  
CTCTCCAA -0.490906783211  
CTCTCCAC -0.892895468914

CTCTCCAG -0.729452774126  
CTCTCCCA -1.33332371595  
CTCTCCCC -0.769878312815  
CTCTCCGA 0.211736342214  
CTCTCCGC -1.07145830476  
CTCTCCTA 0.0270352210164  
CTCTCCTC -1.05274730336  
CTCTCGAA 0.571521310245  
CTCTCGAC -0.427537168213  
CTCTCGCA 0.0789727892434  
CTCTCGCC -0.464605260328  
CTCTCGGA -0.571773282102  
CTCTCGGC -0.647900148551  
CTCTCGTA 0.514063362756  
CTCTCGTC -0.445889292681  
CTCTCTAA 0.566689671483  
CTCTCTAC -0.747291545144  
CTCTCTCA 0.40795602749  
CTCTCTCC -0.793664299238  
CTCTCTGA -0.25356523868  
CTCTCTGC -0.0380597738824  
CTCTCTTA -0.974706600885  
CTCTCTTC -1.12065554836  
CTCTGAAA 0.375496615638  
CTCTGAAC -0.535822334919  
CTCTGAAG -0.245525663616  
CTCTGACA -0.489747294461  
CTCTGACC -1.50002714613  
CTCTGAGA 1.06015930122  
CTCTGAGC 0.0778875328657  
CTCTGATA 1.29883964228  
CTCTGATC 1.70233989774  
CTCTGCAA 0.844467994111  
CTCTGCAC -0.59449570682  
CTCTGCAG -0.106478497129  
CTCTGCCA -0.951187485069  
CTCTGCCC -0.394496443696  
CTCTGCGA 0.364979665828  
CTCTGCGC -0.255521418529  
CTCTGCTA -0.284420290309  
CTCTGCTC -1.34086927981  
CTCTGGAA -0.284382912741  
CTCTGGAC -0.674174226366  
CTCTGGCA 0.26740460993  
CTCTGGCC 0.168409206452  
CTCTGGGA -0.720102108987  
CTCTGGGC -0.970599773282  
CTCTGGTA -1.23041778245  
CTCTGGTC -1.20591900842  
CTCTGTAA 1.90028679258  
CTCTGTAC -0.564263004765  
CTCTGTCA -0.153965259575  
CTCTGTCC -0.707975048558  
CTCTGTGA 0.508924600621

CTCTGTGC -0.466583918994  
CTCTGTTA 0.190981336754  
CTCTGTTC -0.670202533048  
CTCTTAAA 0.373243506299  
CTCTTAAC 0.196974293938  
CTCTTAAG -0.906419091198  
CTCTTACA -0.111239824243  
CTCTTACC -0.0384176052844  
CTCTTAGA -0.38140070308  
CTCTTAGC -0.679936122222  
CTCTTATA 0.958786109384  
CTCTTATC 0.290219040969  
CTCTTCAA 0.524165499977  
CTCTTCAC -0.268608794933  
CTCTTCAG 0.495535589857  
CTCTTCCA -0.550907712227  
CTCTTCCC -0.62264676586  
CTCTTCGA -0.172488850369  
CTCTTCGC -0.139167402021  
CTCTTCTA -0.367783767566  
CTCTTCTC 0.173663237871  
CTCTTGAA -0.0437252199294  
CTCTTGAC -1.23093610215  
CTCTTGCA -0.19768969536  
CTCTTGCC -1.08068010877  
CTCTTGGA -0.390652827358  
CTCTTGGC 0.355271430668  
CTCTTGTA 0.440611475538  
CTCTTGTC -0.270574645901  
CTCTTTAA 1.46625925801  
CTCTTTAC 1.81297566912  
CTCTTTCA 0.43517212457  
CTCTTTCC -1.21311980995  
CTCTTTGA 0.154483056513  
CTCTTTGC -0.169308359135  
CTCTTTTA 2.32992468467  
CTCTTTTC 0.196934563935  
CTGAAAAA 0.19193198161  
CTGAAAAC 0.457416220971  
CTGAAAAG -0.266678753244  
CTGAAACA -0.0360343279116  
CTGAAACC 1.66786288136  
CTGAAAGA 0.638927179816  
CTGAAAGC -1.09405291388  
CTGAAATA 1.70418682008  
CTGAAATC 8.05143656077  
CTGAACAA -0.0896936166973  
CTGAACAC -0.514293117177  
CTGAACAG 0.221814955092  
CTGAACCA -0.847336918485  
CTGAACCC -0.611423562983  
CTGAACGA 0.818303173802  
CTGAACGC -0.385929139194  
CTGAACTA 0.0607380251107

CTGAACTC 0.838173402567  
CTGAAGAA 0.526820875589  
CTGAAGAC -0.592691651059  
CTGAAGCA -0.619860699451  
CTGAAGCC -0.434235855701  
CTGAAGGA -0.575742622986  
CTGAAGGC -1.42282312613  
CTGAAGTA 1.12037038104  
CTGAAGTC 0.493129833667  
CTGAATAA 1.55093748469  
CTGAATAC 0.259993918981  
CTGAATCA 0.669751127035  
CTGAATCC 1.6686334343  
CTGAATGA -0.737388319316  
CTGAATGC -0.425408476513  
CTGAATTA 1.25946721003  
CTGAATTC 0.358647435335  
CTGACAAA 0.131974964702  
CTGACAAC -0.0559944719453  
CTGACAAG -1.14895298109  
CTGACACA -0.241166341394  
CTGACACC -1.09987152954  
CTGACAGA 0.828339704243  
CTGACAGC -0.20289641671  
CTGACATA -0.53996993805  
CTGACATC 0.209739386837  
CTGACCAA -0.893433914997  
CTGACCAC -0.802534545007  
CTGACCAG -0.734113730708  
CTGACCCA -0.306080721611  
CTGACCCC -1.12583142668  
CTGACCGA -0.289068700575  
CTGACCGC -0.806648952676  
CTGACCTA -1.08077577444  
CTGACCTC -0.74594124783  
CTGACGAA -0.0197191502042  
CTGACGAC 0.0497058921786  
CTGACGCA 0.941557925769  
CTGACGCC -1.23710313948  
CTGACGGA 0.515283492036  
CTGACGGC -1.23504397528  
CTGACGTA -0.14220779272  
CTGACGTC -0.450089172132  
CTGACTAA -0.228009698867  
CTGACTAC -0.253414682882  
CTGACTCA -0.354188788106  
CTGACTCC -0.751547883019  
CTGACTGA -0.116662969552  
CTGACTGC -0.856970921271  
CTGACTTA 0.893804292715  
CTGACTTC -0.724196390274  
CTGAGAAA 0.635634555878  
CTGAGAAC -0.218823965513  
CTGAGAAG -0.206972924048

CTGAGACA -0.185802583234  
CTGAGACC -0.559421433502  
CTGAGAGA 0.755017985059  
CTGAGAGC -0.942929133611  
CTGAGATA 2.61693448243  
CTGAGATC 3.78556270161  
CTGAGCAA -0.182869358988  
CTGAGCAC -0.750805036529  
CTGAGCAG -0.778302902966  
CTGAGCCA -0.410208352685  
CTGAGCCC -1.37519103551  
CTGAGCGA 0.124142665242  
CTGAGCGC -0.669216863057  
CTGAGCTA -0.687211678887  
CTGAGCTC -1.02392266396  
CTGAGGAA 0.806131155739  
CTGAGGAC -0.813806887624  
CTGAGGCA -0.164260296413  
CTGAGGCC -1.7413058816  
CTGAGGGA -0.598094931367  
CTGAGGGC -1.23984686207  
CTGAGGTA 0.265837104512  
CTGAGGTC -1.19983718149  
CTGAGTAA 0.509154616423  
CTGAGTAC -0.203225757518  
CTGAGTCA 0.24669560763  
CTGAGTCC -0.870917720357  
CTGAGTGA -0.0455311053614  
CTGAGTGC -0.324037375728  
CTGAGTTA 0.0762884002744  
CTGAGTTC 0.542734309787  
CTGATAAA 0.957625313726  
CTGATAAC 1.15844792887  
CTGATAAG 0.736492564594  
CTGATACA 1.0194815293  
CTGATACC 1.98234885089  
CTGATAGA -0.332344082781  
CTGATAGC 0.0137434442053  
CTGATATA 2.66348105528  
CTGATATC 8.83496918667  
CTGATCAA 0.276358236428  
CTGATCAC 1.27206841667  
CTGATCAG 1.90494173739  
CTGATCCA -0.121793628858  
CTGATCCC 1.63655537819  
CTGATCGA 0.703615203573  
CTGATCGC 3.25175274359  
CTGATCTA 1.17074619424  
CTGATCTC 2.61577813026  
CTGATGAA -0.915113949918  
CTGATGAC -0.701463510292  
CTGATGCA -0.37216295479  
CTGATGCC -0.478893946539  
CTGATGGA -0.330466840174

CTGATGGC -0.047888767338  
CTGATGTA 0.367193567928  
CTGATGTC 0.993573647093  
CTGATTAA 0.685017119025  
CTGATTAC 7.44473956115  
CTGATTCA 2.07771863028  
CTGATTCC 7.12210109971  
CTGATTGA 1.36050112856  
CTGATTGC 7.56733118801  
CTGATTTA 0.832582450274  
CTGATTTT 9.90204333795  
CTGCAAAA 0.873739857426  
CTGCAAAC 0.165928433745  
CTGCAAAG -0.265949759979  
CTGCAACA 0.640827162621  
CTGCAACC -0.321803608627  
CTGCAAGA 0.617193300286  
CTGCAAGC -0.663295001667  
CTGCAATA 1.44433143334  
CTGCAATC 6.56878005123  
CTGCACAA 1.73267793657  
CTGCACAC -0.810096837281  
CTGCACAG -0.27824436601  
CTGCACCA -1.01724645529  
CTGCACCC -1.00802961752  
CTGCACGA 1.03649668691  
CTGCACGC -0.881864904271  
CTGCACTA 0.981176318096  
CTGCACTC -0.645076181811  
CTGCAGAA 1.11081217891  
CTGCAGAC 0.185194086884  
CTGCAGCA -0.0263885629532  
CTGCAGCC -1.06543868665  
CTGCAGGA -0.379664606534  
CTGCAGGC -0.52517783089  
CTGCAGTA 0.256749389257  
CTGCAGTC 1.14460620519  
CTGCATAA 0.932318870571  
CTGCATAC 0.503801259999  
CTGCATCA 0.233211976729  
CTGCATCC 0.932754332306  
CTGCATGA -0.889596571817  
CTGCATGC -0.0790318614836  
CTGCATTA 1.49531495875  
CTGCATTC 0.934470563852  
CTGCCAAA 0.555129024968  
CTGCCAAC 0.0861586920219  
CTGCCAAG -0.434328907548  
CTGCCACA -0.575324935199  
CTGCCACC -0.788836058436  
CTGCCAGA 0.325674931414  
CTGCCAGC -0.690640744017  
CTGCCATA -0.293640264651  
CTGCCATC -1.16349573021



CTGCCCAA -0.799903477883  
CTGCCAC -0.971832448879  
CTGCCAG -0.195177034098  
CTGCCCA -0.0180591157016  
CTGCCCC -1.04446830276  
CTGCCCGA -0.863647129942  
CTGCCCGC -0.99917348636  
CTGCCCTA 0.759606277557  
CTGCCCTC -0.530248895193  
CTGCCGAA -0.949298741672  
CTGCCGAC -0.759815382832  
CTGCCGCA -0.787535423625  
CTGCCGCC -0.93206454628  
CTGCCGGA -0.559461163505  
CTGCCGGC -0.637737893564  
CTGCCGTA -0.615139363721  
CTGCCGTC -1.11768729898  
CTGCCTAA 0.408347315737  
CTGCCTAC -1.00247578142  
CTGCCTCA -0.729786819803  
CTGCCTCC -0.693154712186  
CTGCCTGA -0.253652017369  
CTGCCTGC -0.529604850946  
CTGCCTTA 0.0413432494645  
CTGCCTTC -0.741161624005  
CTGCGAAA 0.737027089953  
CTGCGAAC -0.848050490236  
CTGCGAAG -0.131676989685  
CTGCGACA -0.654515193929  
CTGCGACC -1.05841484046  
CTGCGAGA -0.521267039483  
CTGCGAGC -0.00696581947645  
CTGCGATA 2.30456335138  
CTGCGATC 2.90852054913  
CTGCGCAA 1.20877773891  
CTGCGCAC -0.349355319673  
CTGCGCAG 0.4395654264  
CTGCGCCA 0.0335023244118  
CTGCGCCC 0.455494804874  
CTGCGCGA 0.991536961714  
CTGCGCGC -0.674481088358  
CTGCGCTA -0.15109947178  
CTGCGCTC -0.421586554847  
CTGCGGAA -0.365945209435  
CTGCGGAC -0.74508522311  
CTGCGGCA -0.918213151477  
CTGCGGCC -1.45709469657  
CTGCGGGA -1.1813193411  
CTGCGGGC -0.382824971385  
CTGCGGTA -0.228214099273  
CTGCGGTC -1.7314235663  
CTGCGTAA 1.16786812151  
CTGCGTAC -0.541718319532  
CTGCGTCA -0.804900309813

CTGCGTCC -1.52346654055  
CTGCGTGA 1.19062870794  
CTGCGTGC -1.47670824861  
CTGCGTTA 0.118079135028  
CTGCGTTC -0.425320652297  
CTGCTAAA 0.263054697445  
CTGCTAAC -0.257271629681  
CTGCTAAG -0.284420290309  
CTGCTACA -0.0181607931416  
CTGCTACC 0.0273572431401  
CTGCTAGA 1.57487925454  
CTGCTAGC -0.718252050066  
CTGCTATA 0.463479228422  
CTGCTATC 0.179349594445  
CTGCTCAA -0.63358009655  
CTGCTCAC 0.540592549007  
CTGCTCCA -0.143629708591  
CTGCTCCC -1.39138231835  
CTGCTCGA -0.150923561968  
CTGCTCGC -0.607032352206  
CTGCTCTA -0.48115228351  
CTGCTCTC -0.25356523868  
CTGCTGAA -0.576845391931  
CTGCTGAC -0.180787715975  
CTGCTGCA -1.17978633805  
CTGCTGCC -0.431603220287  
CTGCTGGA -0.797287832273  
CTGCTGGC -1.45058707903  
CTGCTGTA 0.202360061679  
CTGCTGTC -0.347919027814  
CTGCTTAA -0.189098866515  
CTGCTTAC 0.7054694446  
CTGCTTCA -0.555063679569  
CTGCTTCC -0.78508784638  
CTGCTTGA -0.273300855925  
CTGCTTGC -0.819556759926  
CTGCTTTA -0.355414667782  
CTGCTTTC -0.814373040156  
CTGGAAAA 2.18943782836  
CTGGAAAC -0.236743242062  
CTGGAAAG -0.0941598439916  
CTGGAAACA -0.515844416937  
CTGGAAACC -0.437205150607  
CTGGAAGA 1.19269231563  
CTGGAAGC -0.702391937714  
CTGGAATA 3.02584559826  
CTGGAATC 4.9510752522  
CTGGACAA 0.152586994431  
CTGGACAC -0.247548495771  
CTGGACAG -1.0851842364  
CTGGACCA -0.699969453102  
CTGGACCC -1.19837344457  
CTGGACGA -0.390304928457  
CTGGACGC -0.191808086735

CTGGACTA 0.256671497542  
CTGGACTC -0.641660969906  
CTGGAGAA 0.506135659014  
CTGGAGAC -0.921243871058  
CTGGAGCA -0.606555330797  
CTGGAGCC -1.3040027129  
CTGGAGGA -0.941879163748  
CTGGAGGC -0.900896882265  
CTGGAGTA 0.345321156153  
CTGGAGTC -1.15351173747  
CTGGATAA 0.67687743481  
CTGGATAC 5.44139732479  
CTGGATCA 1.26182539477  
CTGGATCC 1.47836383963  
CTGGATGA -0.400336231266  
CTGGATGC -0.552262191646  
CTGGATTA 3.21923007739  
CTGGATTC 6.7704926707  
CTGGCAAA -0.501665772378  
CTGGCAAC -0.973392374231  
CTGGCAAG 1.31020660503  
CTGGCACA -1.24390245888  
CTGGCACC -1.54698931571  
CTGGCAGA -0.575691392194  
CTGGCAGC -1.20730981988  
CTGGCATA -0.123684201926  
CTGGCATC 0.284684285719  
CTGGCAA -0.703957613461  
CTGGCCAC -0.373263894063  
CTGGCCAG -0.0521715047535  
CTGGCCCA -0.853311056194  
CTGGCCCC -0.515638971004  
CTGGCCGA 0.588782166559  
CTGGCCGC -0.781323951428  
CTGGCCTA -1.14178798884  
CTGGCCTC -0.1735761978  
CTGGCGAA -0.41950099111  
CTGGCGAC -0.681188662819  
CTGGCGCA 0.128193557184  
CTGGCGCC -0.672037170455  
CTGGCGGA 0.331161069687  
CTGGCGGC -0.886171427411  
CTGGCGTA 0.554048996222  
CTGGCGTC -1.08645298266  
CTGGCTAA -0.87815694498  
CTGGCTAC -0.371355285665  
CTGGCTCA -0.150468757994  
CTGGCTCC -1.72315815754  
CTGGCTGA -0.357778602917  
CTGGCTGC 0.0313668367899  
CTGGCTTA -0.343574604343  
CTGGCTTC -1.40897878863  
CTGGGAAA 0.813777090122  
CTGGGAAC -1.45133985802

CTGGGAAG -0.27817562265  
CTGGGACA -0.952266468288  
CTGGGACC -1.22296474768  
CTGGGAGA -0.835236257597  
CTGGGAGC -0.349747130682  
CTGGGATA 1.42202251431  
CTGGGATC 1.11889200674  
CTGGGCAA -0.43391592463  
CTGGGCAC -1.78350541717  
CTGGGCCA -0.358822299621  
CTGGGCCC -1.21979601862  
CTGGGCGA -0.112465181155  
CTGGGCGC -1.26602396731  
CTGGGCTA -0.437598529906  
CTGGGCTC -1.86116424114  
CTGGGGAA -0.466887121643  
CTGGGGAC -1.32506196654  
CTGGGGCA -0.571987615009  
CTGGGGCC -1.25751965577  
CTGGGGGA 0.567657044762  
CTGGGGGC -1.49828660609  
CTGGGGTA -0.476149439803  
CTGGGGTC -1.32353523665  
CTGGGTAA 1.76112853892  
CTGGGTAC -0.367515590051  
CTGGGTCA -0.897129589353  
CTGGGTCC -0.84518783902  
CTGGGTGA -0.82727169905  
CTGGGTGC -0.853392607251  
CTGGGTTA 0.63486086636  
CTGGGTTC 0.865043953179  
CTGGTAAA 0.48811392088  
CTGGTAAC 0.0100114378081  
CTGGTAAG -0.175784088123  
CTGGTACA -1.07004344619  
CTGGTACC -1.01373139561  
CTGGTAGA 0.900822388511  
CTGGTAGC -0.954904331334  
CTGGTATA 0.786249426183  
CTGGTATC 1.66616599205  
CTGGTCAA -0.102311551759  
CTGGTCAC -0.832345115787  
CTGGTCCA -0.699969453102  
CTGGTCCC 0.44115619478  
CTGGTCGA -0.603275775939  
CTGGTCGC -0.460030559673  
CTGGTCTA -0.946423544139  
CTGGTCTC 0.92169527707  
CTGGTGAA 0.464999423772  
CTGGTGAC -0.537717874237  
CTGGTGCA -0.757100150835  
CTGGTGCC -0.0815860824189  
CTGGTGGA -1.18407796244  
CTGGTGGC -0.084050910849

CTGGTGTA -0.713861362052  
CTGGTGTC -0.600862962446  
CTGGTTAA -0.952847519572  
CTGGTTAC 0.857767612369  
CTGGTTCA 0.0562331133405  
CTGGTTCC -1.45387029323  
CTGGTTGA -0.106237241918  
CTGGTTGC -0.245530891248  
CTGGTTTA 0.44488872394  
CTGGTTTC -0.0027811001587  
CTGTAAAA -0.117211348136  
CTGTAAAC 0.87347978274  
CTGTAAAG -0.264855355246  
CTGTAACA 0.0954372158409  
CTGTAACC 0.147792210473  
CTGTAAGA 2.13655196771  
CTGTAAGC -0.514017882359  
CTGTAATA 1.62966196142  
CTGTAATC 12.8240284371  
CTGTACAA 0.00597439909093  
CTGTACAC -0.244889460817  
CTGTACAG -0.496527271624  
CTGTACCA -0.652649452112  
CTGTACCC 0.140564748021  
CTGTACGA -0.0607510941904  
CTGTACGC 0.0686163277314  
CTGTACTA 0.150010033297  
CTGTACTC -0.284420290309  
CTGTAGAA 0.838980026166  
CTGTAGAC 0.382705781379  
CTGTAGCA 0.560847531478  
CTGTAGCC -0.916939177588  
CTGTAGGA -0.322860635792  
CTGTAGGC -0.521908469914  
CTGTAGTA -0.125735001912  
CTGTAGTC 0.0536109331909  
CTGTATAA 0.988249304026  
CTGTATAC 1.69779107386  
CTGTATCA 1.0469414954  
CTGTATCC 0.946472683879  
CTGTATGA 0.592474704336  
CTGTATGC -0.63847368275  
CTGTATTA 0.373291861894  
CTGTATTC 0.271035984414  
CTGTCAA 0.195160567058  
CTGTCAAC -0.734769275745  
CTGTCAAG 0.488629888147  
CTGTCACA -0.31633655121  
CTGTCACC -0.196643646221  
CTGTCAGA -0.643096739001  
CTGTCAGC -0.180157002189  
CTGTCATA -0.415818385834  
CTGTCATC 0.310143898488  
CTGTCCAA -0.918072005416

CTGTCCAC -0.443480399912  
CTGTCCCA -0.274778446075  
CTGTCCCC -0.420065836734  
CTGTCCGA 0.126407275371  
CTGTCCGC -0.774717793025  
CTGTCCTA 0.525809067439  
CTGTCCTC -0.572693345312  
CTGTGCGA 0.526443440568  
CTGTGCGAC -0.608778119871  
CTGTGCGA 0.695442323896  
CTGTGCGC -0.316919954927  
CTGTGCGA -0.270201131603  
CTGTGCGC -0.19119880624  
CTGTGCGTA -0.621530666454  
CTGTGCGTC -0.451053670213  
CTGTCTAA -0.0966782556485  
CTGTCTAC 0.0748492332186  
CTGTCTCA -0.423370745607  
CTGTCTCC -1.17213648294  
CTGTCTGA -0.3050129778  
CTGTCTGC -0.210496347933  
CTGTCTTA 0.634613599372  
CTGTCTTC -0.704596430076  
CTGTGAAA 0.590564004885  
CTGTGAAC 0.770083497366  
CTGTGAAG 0.303570412784  
CTGTGACA -0.629858022653  
CTGTGACC -0.728499776835  
CTGTGAGA -0.649107208752  
CTGTGAGC -0.86579673217  
CTGTGATA 1.29105569841  
CTGTGATC 2.12174287075  
CTGTGCAA 1.39657544785  
CTGTGCAC 0.440218357621  
CTGTGCCA -0.0901123500107  
CTGTGCCC -1.17020121362  
CTGTGCGA 0.568715901598  
CTGTGCGC -0.199264258082  
CTGTGCTA 0.0788407915385  
CTGTGCTC -0.759122721609  
CTGTGGAA -0.362968073081  
CTGTGGAC -0.594708210055  
CTGTGGCA -1.57029514415  
CTGTGGCC -0.854552357383  
CTGTGGGA 0.0836285181933  
CTGTGGGC -1.16887339512  
CTGTGGTA -0.423557372065  
CTGTGGTC -0.417754700681  
CTGTGTAA 1.56839359305  
CTGTGTAC 0.131300077427  
CTGTGTCA -0.120052043298  
CTGTGTCC -0.15959907845  
CTGTGTGA 0.982267324869  
CTGTGTGC -0.0385226806851

CTGTGTTA 0.604982336365  
CTGTGTTC 0.677144044036  
CTGTTAAA 0.898591757989  
CTGTTAAC -0.718790496149  
CTGTTAAG 0.185324254918  
CTGTTACA -0.720138179647  
CTGTTACC -0.385897512021  
CTGTTAGA -0.232037327846  
CTGTTAGC 0.551677742402  
CTGTTATA 1.71116570863  
CTGTTATC 0.0912268811269  
CTGTTCAA -0.535604342669  
CTGTTCAC -0.623793446913  
CTGTTCCA -0.295515677587  
CTGTTCCC -0.135781464854  
CTGTTCGA 1.1912215214  
CTGTTCGC 0.881404088521  
CTGTTCTA -0.234213068234  
CTGTTCTC 0.0386248808883  
CTGTTGAA 0.343732478826  
CTGTTGAC -0.839291593026  
CTGTTGCA -0.452863999132  
CTGTTGCC -0.973085773621  
CTGTTGGA 0.510915021458  
CTGTTGGC -0.756681417522  
CTGTTGTA -0.295785162011  
CTGTTGTC -0.155038753781  
CTGTTTAA 0.371690376868  
CTGTTTAC -0.0511826981839  
CTGTTTCA -0.360281070296  
CTGTTTCC -0.448205394985  
CTGTTTGA -0.656224106789  
CTGTTTGC -0.0431049614071  
CTGTTTTA 0.949621809322  
CTGTTTTC 0.338460150696  
CTTAAAAA 1.16652827946  
CTTAAAAC 0.245949101798  
CTTAAAAG -0.18084103782  
CTTAAACA 0.286249961466  
CTTAAACC 0.121951241959  
CTTAAAGA 1.72230448526  
CTTAAAGC 0.361419648519  
CTTAAATA 0.737761049469  
CTTAAATC 1.39217744116  
CTTAAACA 0.866769071699  
CTTAAACAC -0.301799029722  
CTTAAACCA 0.947191483262  
CTTAAACCC 0.500063764589  
CTTAAACGA -0.503155386081  
CTTAAACGC -0.511672243935  
CTTAAACTA 0.945292545983  
CTTAAACTC 0.220800794508  
CTTAAAGAA 1.23937271586  
CTTAAAGAC -0.46817076665

CTTAAGCA 0.832326034931  
CTTAAGCC -1.2698754251  
CTTAAGGA -0.269161355623  
CTTAAGGC -0.276428809459  
CTTAAGTA -0.10669021622  
CTTAAGTC 0.771316695726  
CTTAATAA 0.865305857536  
CTTAATAC 0.951237147572  
CTTAATCA 0.846139790785  
CTTAATCC 0.12650215689  
CTTAATGA -0.180275408051  
CTTAATGC -0.113637738985  
CTTAATTA 1.1478253809  
CTTAATTC -0.0343337792619  
CTTACAAA 1.01099603723  
CTTACAAC 0.144395556661  
CTTACAAG 0.108186887226  
CTTACACA 0.671026669213  
CTTACACC 0.408910070308  
CTTACAGA 4.65455430101  
CTTACAGC -0.104244991409  
CTTACATA 1.31214291988  
CTTACATC 0.658578632187  
CTTACCAA -0.425320652297  
CTTACCAC 0.226186562249  
CTTACCCA -0.278815223411  
CTTACCCC 0.0670872454073  
CTTACCGA 0.680737518188  
CTTACCGC 0.568128054394  
CTTACCTA -0.394995943922  
CTTACCTC 0.112095326199  
CTTACGAA 0.787429825461  
CTTACGAC -0.349810123646  
CTTACGCA -0.277919207307  
CTTACGCC -1.11194343845  
CTTACGGA 0.316916295585  
CTTACGGC -0.677973146452  
CTTACGTA 1.03921165753  
CTTACGTC -0.293291058842  
CTTACTAA 0.632126814888  
CTTACTAC -0.0380707519093  
CTTACTCA 0.947117250889  
CTTACTCC -1.32719222653  
CTTACTGA 1.71052767616  
CTTACTGC 0.694811871491  
CTTACTTA 1.20909662446  
CTTACTTC 0.769489638385  
CTTAGAAA -0.0172391616416  
CTTAGAAC 0.344415207549  
CTTAGAAG -0.394504807907  
CTTAGACA -0.821733023076  
CTTAGACC -0.120595717013  
CTTAGAGA 0.00151522909962  
CTTAGAGC -0.246526232357



CTTAGATA 2.17517606446  
CTTAGATC 2.12928712769  
CTTAGCAA 0.493841575747  
CTTAGCAC -0.501709945867  
CTTAGCCA -0.474043749683  
CTTAGCCC -1.31279323728  
CTTAGCGA 0.519408093587  
CTTAGCGC -0.529764293718  
CTTAGCTA 0.279089674084  
CTTAGCTC -0.366720990006  
CTTAGGAA 0.626819984388  
CTTAGGAC -0.236065479589  
CTTAGGCA -0.729969002774  
CTTAGGCC -0.402408725924  
CTTAGGGA -0.545724515221  
CTTAGGGC -1.14725347797  
CTTAGGTA 0.126003179427  
CTTAGGTC -0.576071441031  
CTTAGTAA 0.365141722416  
CTTAGTAC 0.227628865884  
CTTAGTCA -0.149578492286  
CTTAGTCC -0.929624810483  
CTTAGTGA -0.911933197303  
CTTAGTGC -0.564823145521  
CTTAGTTA 1.28917165988  
CTTAGTTC 0.755461549624  
CTTATAAA 0.082961995129  
CTTATAAC 0.592072699444  
CTTATAAG -0.309899245316  
CTTATACA 1.99447172921  
CTTATACC -0.30430933855  
CTTATAGA 0.394857150296  
CTTATAGC 0.385223931654  
CTTATATA 1.31020660503  
CTTATATC 1.61004056793  
CTTATCAA 0.496260662398  
CTTATCAC -0.357455012503  
CTTATCCA -0.214096095244  
CTTATCCC 0.0486274317223  
CTTATCGA 0.187360417534  
CTTATCGC -0.00368182113115  
CTTATCTA 1.12328766101  
CTTATCTC 0.671046795596  
CTTATGAA 1.12543830876  
CTTATGAC -0.428625038407  
CTTATGCA 0.745264792265  
CTTATGCC -0.259890673252  
CTTATGGA -0.0897354377523  
CTTATGGC 0.258964336883  
CTTATGTA -0.367128222529  
CTTATGTC -0.350294725121  
CTTATTAA 1.15213373371  
CTTATTAC 2.09303768273  
CTTATTCA 1.36979847185

CTTATTCC 1.53548669591  
CTTATTGA 0.00331301170221  
CTTATTGC -0.197876844581  
CTTATTTA 1.56492349101  
CTTATTTC 0.51397214058  
CTTCAAAA 0.58461678948  
CTTCAAAC 0.555153594838  
CTTCAAAG 0.293152526597  
CTTCAACA -0.417626885082  
CTTCAACC 0.0257617698911  
CTTCAAGA 0.356332117176  
CTTCAAGC -0.478878786406  
CTTCAATA 2.33088552341  
CTTCAATC 0.127929823156  
CTTCACAA -0.0969273523075  
CTTCACAC -0.0469227009671  
CTTCACCA 0.29866976928  
CTTCACCC -1.21272172578  
CTTCACGA -0.814618216091  
CTTCACGC -0.398586542877  
CTTCACTA -0.611675012076  
CTTCACTC -0.718854273258  
CTTCAGAA -0.0299679224996  
CTTCAGAC 0.225588521163  
CTTCAGCA -0.197535741601  
CTTCAGCC -0.887924775143  
CTTCAGGA -0.374969147582  
CTTCAGGC -1.17990683496  
CTTCAGTA 0.641711939317  
CTTCAGTC -0.815302513104  
CTTCATAA 1.16794705875  
CTTCATAC -0.609290950559  
CTTCATCA -0.882530904572  
CTTCATCC -0.619499470089  
CTTCATGA -0.698483237359  
CTTCATGC -0.311465443826  
CTTCATTA -0.129453677848  
CTTCATTC -0.591121793206  
CTTCCAAA -0.489698416102  
CTTCCAAC -0.672054160259  
CTTCCAAG -0.156911552902  
CTTCCACA -0.181870881299  
CTTCCACC -1.07886977986  
CTTCCAGA -0.564823145521  
CTTCCAGC -0.260052207077  
CTTCCATA 1.97545099062  
CTTCCATC -0.553628171856  
CTTCCCAA -1.01665808532  
CTTCCCAC -0.851976964539  
CTTCCCCA -0.983240448543  
CTTCCCCC -1.60017027618  
CTTCCCGA 0.702567063381  
CTTCCCGC -1.51633474377  
CTTCCCTA 0.100786651541

CTTCCCTC -0.386434912578  
CTTCCGAA -0.367657520257  
CTTCCGAC -1.03783443791  
CTTCCGCA 0.238769472178  
CTTCCGCC -0.87188587778  
CTTCCGGA -0.136804512412  
CTTCCGGC -0.922624227255  
CTTCCGTA -0.158068427836  
CTTCCGTC 0.594396120432  
CTTCCTAA 0.492153312032  
CTTCCTAC 0.198995557803  
CTTCCTCA -0.748966217016  
CTTCCTCC -1.54807404933  
CTTCCTGA -0.0286003740005  
CTTCCTGC -0.610638634057  
CTTCCTTA -0.123857759305  
CTTCCTTC -1.62385876727  
CTTCGAAA 0.351176103856  
CTTCGAAC 0.155003990029  
CTTCGAAG 0.858498958069  
CTTCGACA -0.0305034933854  
CTTCGACC -1.09237327576  
CTTCGAGA 0.710303697178  
CTTCGAGC -1.24070785304  
CTTCGATA 0.856540948549  
CTTCGATC 1.14157626975  
CTTCGCAA 1.00901345784  
CTTCGCAC -0.48884683487  
CTTCGCCA -0.301528761154  
CTTCGCCC -0.821568352672  
CTTCGCGA -0.624050123638  
CTTCGCGC 0.0221696026467  
CTTCGCTA -0.00414760313142  
CTTCGCTC -1.21548400647  
CTTCGGAA 0.255759014397  
CTTCGGAC -0.964003024616  
CTTCGGCA -0.585253253661  
CTTCGGCC -1.08475870716  
CTTCGGGA 0.681781214893  
CTTCGGGC -1.08692346953  
CTTCGGTA -0.609402299118  
CTTCGGTC -1.31341610962  
CTTCGTAA 0.0692703044792  
CTTCGTAC 0.892574753698  
CTTCGTCA -0.587671033404  
CTTCGTCC -1.00273977683  
CTTCGTGA 0.650052887358  
CTTCGTGC -0.175725277265  
CTTCGTTA -0.300590401232  
CTTCGTTC -0.939127861091  
CTTCTAAA -0.384473505098  
CTTCTAAC -0.132352922487  
CTTCTACA -0.614297453607  
CTTCTACC -0.795694188696

CTTCTAGA -1.00245434813  
CTTCTAGC -0.20803099674  
CTTCTATA 0.526841001972  
CTTCTATC -0.236605755344  
CTTCTCAA 0.228225338682  
CTTCTCAC -0.149183021934  
CTTCTCCA -1.14126391874  
CTTCTCCC -0.931378419596  
CTTCTCGA 0.225267021802  
CTTCTCGC -1.03869673579  
CTTCTCTA -0.0829734959191  
CTTCTCTC -0.444341652264  
CTTCTGAA -0.548578279462  
CTTCTGAC -0.241166341394  
CTTCTGCA -0.630746720072  
CTTCTGCC -1.47307687413  
CTTCTGGA -0.501701581656  
CTTCTGGC -0.407231216331  
CTTCTGTA 0.543363978046  
CTTCTGTC -1.32455279519  
CTTCTTAA 0.220301817045  
CTTCTTAC 2.03892437411  
CTTCTTCA 0.399970297035  
CTTCTTCC -1.36630406132  
CTTCTTGA 0.541112175615  
CTTCTTGC -1.20012470125  
CTTCTTTA -0.179067302324  
CTTCTTTC 0.31294198845  
CTTGAAAA 0.772281193807  
CTTGAAAC -0.349801759435  
CTTGAAAG -0.286628964778  
CTTGAACA -0.135502309311  
CTTGAACC -0.881684550971  
CTTGAAGA 0.594998082243  
CTTGAAGC -1.30779300739  
CTTGAATA -0.184205541696  
CTTGAATC 0.690931923112  
CTTGACAA 0.286150636461  
CTTGACAC -0.18379464983  
CTTGACCA 0.334164344201  
CTTGACCC -0.805454700174  
CTTGACGA -0.0285219595223  
CTTGACGC -0.494727397968  
CTTGACTA 0.0544321941588  
CTTGACTC -1.23514669825  
CTTGAGAA 1.20838488238  
CTTGAGAC -0.433418254075  
CTTGAGCA -0.456697421588  
CTTGAGCC -1.32418424714  
CTTGAGGA 0.899832275033  
CTTGAGGC -1.17554960379  
CTTGAGTA 1.27362781926  
CTTGAGTC -0.287478977721  
CTTGATAA 1.17648874786

CTTGATAC 2.71215449016  
CTTGATCA -0.256564331088  
CTTGATCC -0.0660273430442  
CTTGATGA -0.471388374071  
CTTGATGC 0.153496863759  
CTTGATTA 1.46158000472  
CTTGATTC 2.99667567377  
CTTGCAAA 0.0750933636273  
CTTGCAAC 0.529289886125  
CTTGCAAG 0.844079581062  
CTTGCACA 0.877168399792  
CTTGCAACC -0.885053236953  
CTTGCAAGA 1.52221086338  
CTTGCAAGC -1.27556152029  
CTTGCAATA 0.920315705018  
CTTGCAATC -0.810811454558  
CTTGCCAA -0.0346492668457  
CTTGCCAC -0.96475475808  
CTTGCCCA -0.844715261098  
CTTGCCCC -0.595322718183  
CTTGCCGA 0.0153679308112  
CTTGCCGC -0.640181550085  
CTTGCCTA -0.673794961674  
CTTGCCTC -0.335618148626  
CTTGCGAA 0.459151271991  
CTTGCGAC -0.138595499093  
CTTGCGCA 1.65888912848  
CTTGCGCC -1.29448946841  
CTTGCGGA -0.519250480486  
CTTGCGGC -0.162329993342  
CTTGCGTA 1.37926022417  
CTTGCGTC 0.19195655148  
CTTGCTAA -0.213696704168  
CTTGCTAC 0.204429158376  
CTTGCTCA 0.10935996782  
CTTGCTCC -0.49582154132  
CTTGCTGA -0.388968745749  
CTTGCTGC -1.31963960537  
CTTGCTTA 0.0189057306841  
CTTGCTTC -0.00199434156118  
CTTGAAA 0.378016334203  
CTTGAAAC 0.375180866673  
CTTGACA 0.220301817045  
CTTGACC -0.944561723046  
CTTGAGA 1.12937157899  
CTTGAGC -0.802082877613  
CTTGATA 2.62972153138  
CTTGATC 0.906643356606  
CTTGCAA 0.318419762513  
CTTGCAC -0.974453060739  
CTTGCCA -0.773077884905  
CTTGCCC -1.77120218555  
CTTGCGA 0.0936653100161  
CTTGCGC -0.0595296580023

CTTGGCTA -0.233495575759  
CTTGGCTC -1.08979709877  
CTTGGGAA 0.0606671906988  
CTTGGGAC -1.01920472619  
CTTGGGCA -1.28054502176  
CTTGGGCC -1.83280669064  
CTTGGGGA 1.17569388643  
CTTGGGGC -0.380729475147  
CTTGGGTA -0.270322412663  
CTTGGGTC -1.23517231364  
CTTGGTAA 1.06707467405  
CTTGGTAC -0.278293244368  
CTTGGTCA -0.596229973695  
CTTGGTCC -1.04743367694  
CTTGGTGA -0.895375980239  
CTTGGTGC -0.346273107918  
CTTGGTTA 1.17424347997  
CTTGGTTC -0.540006531473  
CTTGTAAC 1.42464417169  
CTTGTAAC 1.61749203441  
CTTGTAACA 0.390253697665  
CTTGTAACC -0.979511840106  
CTTGTAGA -0.0112618873532  
CTTGTAGC -0.181195732643  
CTTGTAATA 0.666305856246  
CTTGTAATC -0.115047892684  
CTTGTAACA 0.950342699758  
CTTGTCAC -0.0522679545616  
CTTGTCAC -0.373632964874  
CTTGTCAC -0.348463485675  
CTTGTCGA -1.26241663993  
CTTGTCGC -1.22764609203  
CTTGTCCTA -0.531194573799  
CTTGTCCTC 0.0593780566779  
CTTGTGAA 1.12371972478  
CTTGTGAC 0.309839650313  
CTTGTGCA -0.0383932967962  
CTTGTGCC -1.04892590446  
CTTGTGGA -0.552510242779  
CTTGTTGC -1.07427416867  
CTTGTTGA -0.751937602975  
CTTGTTGC -0.909385249526  
CTTGTTAA 0.719112779655  
CTTGTTAC 0.140255010833  
CTTGTTCA -0.08112709634  
CTTGTTCC -0.951845643922  
CTTGTTGA -0.0875293771001  
CTTGTTGC 1.62305475749  
CTTGTTTA 0.214499668425  
CTTGTTTC -0.22543064668  
CTTTAAAA 0.997387727311  
CTTTAAAC 0.485186447029  
CTTTAAAG 0.597837731879  
CTTTAACA -0.381889486661

CTTTAACC -0.0425482186122  
CTTTAAGA -0.610796508539  
CTTTAAGC 1.31646878526  
CTTTAATA 0.563959017972  
CTTTAATC 0.609523580177  
CTTTACAA 1.22348176048  
CTTTACAC 0.324634371288  
CTTTACCA 0.92558358966  
CTTTACCC 0.386004939856  
CTTTACGA 0.728427112752  
CTTTACGC 1.61796722614  
CTTTACTA 0.124746979487  
CTTTACTC -0.330875118223  
CTTTAGAA -0.395947895687  
CTTTAGAC -0.790892608816  
CTTTAGCA 0.338098137188  
CTTTAGCC -0.122790538257  
CTTTAGGA 0.374136908587  
CTTTAGGC -0.792020209012  
CTTTAGTA 0.103704454273  
CTTTAGTC -0.726524254749  
CTTTATAA 0.1037054998  
CTTTATAC 0.441724438365  
CTTTATCA 0.50893427174  
CTTTATCC 0.0409148450322  
CTTTATGA 0.400581929964  
CTTTATGC -0.160857369442  
CTTTATTA 3.60425771147  
CTTTATTC 1.18817956241  
CTTTCAA 0.863585966649  
CTTTCAAC -0.271600045894  
CTTTCACA -0.124369805847  
CTTTCACC 0.701204219751  
CTTTCAGA -0.274118718932  
CTTTCAGC -0.398833809865  
CTTTCATA 0.793517925545  
CTTTCATC -0.571537515904  
CTTTCCAA -0.676499477025  
CTTTCAC -0.182859426487  
CTTTCCCA -0.508775090349  
CTTTCCCC 0.608080231016  
CTTTCCGA -0.805374717406  
CTTTCCGC -0.158574723983  
CTTTCCTA 0.827607313017  
CTTTCCTC -0.936847045303  
CTTTCGAA -0.642466025215  
CTTTCGAC -0.494494245587  
CTTTCGCA 0.425739124229  
CTTTCGCC -0.902401656101  
CTTTCGGA -0.792999344463  
CTTTCGGC -1.19950130615  
CTTTCGTA 0.418196696956  
CTTTCGTC 0.289605316987  
CTTTCCTAA -0.540431799327

CTTTCTAC 0.650826576876  
CTTTCTCA 0.582856907208  
CTTTCTCC -0.28616370554  
CTTTCTGA 0.168409206452  
CTTTCTGC -0.458059742455  
CTTTCTTA 0.605287107304  
CTTTCTTC 0.451441037735  
CTTTGAAA 0.901981354498  
CTTTGAAC 0.106940619787  
CTTTGACA -0.21253094226  
CTTTGACC -0.349936632338  
CTTTGAGA 1.58394684341  
CTTTGAGC -0.876832263063  
CTTTGATA 1.07124031251  
CTTTGATC 0.74510325844  
CTTTGCAA 1.08549318944  
CTTTGCAC 0.294123297837  
CTTTGCCA -0.756208316837  
CTTTGCCC 0.236738798575  
CTTTGCGA 0.448796901532  
CTTTGCGC 1.06653178448  
CTTTGCTA 1.60724561455  
CTTTGCTC -0.219310658041  
CTTTGGAA 0.128461211936  
CTTTGGAC -0.410116346364  
CTTTGGCA -0.531479479737  
CTTTGGCC -0.863748546  
CTTTGGGA 0.781392172024  
CTTTGGGC -0.0951282627969  
CTTTGGTA 0.372544310536  
CTTTGGTC -0.168051113669  
CTTTGTAA 1.73935283833  
CTTTGTAC -0.597287262242  
CTTTGTCA 0.261590699138  
CTTTGTCC 0.613207492361  
CTTTGTGA 1.06926269937  
CTTTGTGC -1.34763958585  
CTTTGTTA 0.15762146531  
CTTTGTTC 0.17125904997  
CTTTTAAA 1.3717604021  
CTTTTAAC 1.25809129732  
CTTTTACA 0.463038016292  
CTTTTACC -0.426514120655  
CTTTTAGA 0.850190421345  
CTTTTAGC -0.236907912466  
CTTTTATA 0.101818324692  
CTTTTATC 0.337112205816  
CTTTTCAA 0.714570228935  
CTTTTCAC -0.403487447762  
CTTTTCCA 0.157264418053  
CTTTTCCC 0.337427432018  
CTTTTCGA 0.603404114302  
CTTTTCGC 0.407545658388  
CTTTTCTA 0.67845330444



CTTTTCTC 0.577955740942  
CTTTTGAA 0.0641895690577  
CTTTTGAC 0.329272849053  
CTTTTGCA 0.794922590231  
CTTTTGCC -0.0511659697619  
CTTTTGGA 0.563865966124  
CTTTTGGC -0.0737545671035  
CTTTTGTA 0.608976769883  
CTTTTGTC -0.747221494877  
CTTTTTAA 0.997387727311  
CTTTTTAC 1.25966481451  
CTTTTTCA -0.267949329172  
CTTTTTCC -0.303544797388  
CTTTTTGA 0.190852998391  
CTTTTTGC -0.929600763377  
CTTTTTTA 0.109523592697  
CTTTTTTC 1.93873445675  
GAAAAAAA -0.0602113411991  
GAAAAAAC -0.0763035604069  
GAAAAACA -0.28795939709  
GAAAAACC 0.50399494376  
GAAAAAGA -0.0688272626776  
GAAAAAGC 0.376198425218  
GAAAAATA 2.11113731258  
GAAAAATC 9.10605953845  
GAAAACAA 0.758638904279  
GAAAACAC 0.637774748368  
GAAAACCA 1.04826879114  
GAAAACCC 0.453224705732  
GAAAACGA 0.386152097694  
GAAAACGC 0.36342705916  
GAAAACTA 0.833621703492  
GAAAACTC -0.354082144416  
GAAAAGAA 1.1693522462  
GAAAAGAC 0.856578326117  
GAAAAGCA 0.153464975205  
GAAAAGCC 0.209387567212  
GAAAAGGA 0.18374054384  
GAAAAGGC -0.385939594458  
GAAAAGTA 1.22745083998  
GAAAAGTC -0.558646175695  
GAAAATAA 1.79908741951  
GAAAATAC 1.68728405655  
GAAAATCA 10.8220757053  
GAAAATCC 12.8353381573  
GAAAATGA 0.337827607239  
GAAAATGC 0.56652683075  
GAAAATTA 2.91251236883  
GAAAATTC 2.96305520488  
GAAACAAA 0.827983702512  
GAAACAAC 0.666614547909  
GAAACACA 0.187576841494  
GAAACACC -0.143343234364  
GAAACAGA 0.563627063348

GAAACAGC -1.25316739085  
GAAACATA 2.25636902896  
GAAACATC 0.224789739012  
GAAACCAA 0.874796361828  
GAAACCAC 0.37436378781  
GAAACCCA 0.863981175619  
GAAACCCC -0.675051422995  
GAAACCGA -0.0401769647927  
GAAACCGC -0.562859646988  
GAAACCTA 0.127026749749  
GAAACCTC -1.23958731014  
GAAACGAA 1.09094142739  
GAAACGAC 0.135789306301  
GAAACGCA 0.332882528864  
GAAACGCC -0.630017465426  
GAAACGGA -0.12476057133  
GAAACGGC -0.378393769225  
GAAACGTA 1.82504731665  
GAAACGTC -0.760218956013  
GAAACTAA 1.66004286684  
GAAACTAC 0.216343454188  
GAAACTCA -0.557464469509  
GAAACTCC -0.491677074768  
GAAACTGA 0.334493162246  
GAAACTGC -0.299342304121  
GAAACTTA 1.65120503238  
GAAACTTC -0.378120886841  
GAAAGAAA 1.30649707745  
GAAAGAAC 0.209719521836  
GAAAGACA 1.17601852237  
GAAAGACC -0.103924798957  
GAAAGAGA 0.228960343723  
GAAAGAGC -0.922381665136  
GAAAGATA 2.40906136017  
GAAAGATC 3.91031281768  
GAAAGCAA 0.887402011955  
GAAAGCAC -0.426828824094  
GAAAGCCA -0.458545650838  
GAAAGCCC -1.35999065031  
GAAAGCGA 0.127026749749  
GAAAGCGC -0.42124100838  
GAAAGCTA -0.173442893187  
GAAAGCTC -1.16340529218  
GAAAGGAA -1.03669742797  
GAAAGGAC 0.351068937402  
GAAAGGCA -1.04232262126  
GAAAGGCC -1.75673314604  
GAAAGGGA -1.11576065525  
GAAAGGGC -0.898866731425  
GAAAGGTA 0.90710809308  
GAAAGGTC -1.00978897703  
GAAAGTAA 1.87237306803  
GAAAGTAC 1.33654289166  
GAAAGTCA -0.662572020178

GAAAGTCC -1.23375510264  
GAAAGTGA 2.4107919677  
GAAAGTGC -0.027462841304  
GAAAGTTA 1.68482889924  
GAAAGTTC -0.00951611968777  
GAAATAAA 3.32193892917  
GAAATAAC 1.33047910007  
GAAATACA 2.01991879566  
GAAATACC 1.32983061233  
GAAATAGA 0.267285681305  
GAAATAGC 0.568672250872  
GAAATATA 2.80541884081  
GAAATATC 9.26224654158  
GAAATCAA 8.34709469133  
GAAATCAC 12.4417126371  
GAAATCCA 19.5252928858  
GAAATCCC 17.7580929752  
GAAATCGA 10.0582413191  
GAAATCGC 14.0519633558  
GAAATCTA 27.3653010119  
GAAATCTC 26.58013266  
GAAATGAA 1.23142096501  
GAAATGAC 0.168589036989  
GAAATGCA 0.435217604967  
GAAATGCC -0.374032355949  
GAAATGGA 0.841276786231  
GAAATGGC 0.0359629707364  
GAAATGTA 0.649189282572  
GAAATGTC 0.372161386501  
GAAATTAA 2.12004885664  
GAAATTAC 4.85288046055  
GAAATTCA 1.79649268442  
GAAATTCC 4.69185240892  
GAAATTGA 0.743232288991  
GAAATTGC 3.64974359781  
GAAATTTA 2.32002930029  
GAAATTTT 5.72306605106  
GAACAAAA 1.01331736717  
GAACAAAC -0.421766646765  
GAACAACA 0.137655048118  
GAACAACC -0.253392726828  
GAACAAGA 0.0413523978203  
GAACAAGC -0.319675962453  
GAACAATA 1.42671849602  
GAACAATC 2.8784067757  
GAACACAA -0.428488074452  
GAACACAC 0.333272510202  
GAACACCA -0.328299986761  
GAACACCC -0.425070771493  
GAACACGA 0.665737874043  
GAACACGC -0.722081290416  
GAACACTA -1.03984916723  
GAACACTC 0.913158554215  
GAACAGAA 1.31532707045

GAACAGAC 0.0663872654989  
GAACAGCA -0.52566321651  
GAACAGCC -0.799037520663  
GAACAGGA 1.05745112653  
GAACAGGC -0.455373262433  
GAACAGTA -0.317060839606  
GAACAGTC -0.461324921325  
GAACATAA 0.989553336798  
GAACATAC 0.176035537217  
GAACATCA 0.468628707203  
GAACATCC 0.726660434559  
GAACATGA 0.481041980477  
GAACATGC 0.0185899817187  
GAACATTA 0.65679156623  
GAACATTC 0.0445681755696  
GAACCAAA 1.52779606528  
GAACCAAC -1.21307642061  
GAACCACA -0.953171371366  
GAACCACC -0.590246164867  
GAACCAGA 0.472393386299  
GAACCAGC -0.0112618873532  
GAACCATA -0.476746696745  
GAACCATC -0.750265022156  
GAACCCAA -0.164673540713  
GAACCCAC -0.156116691475  
GAACCCCA -0.361506427208  
GAACCCCC -0.947000151935  
GAACCCGA -0.29391889743  
GAACCCGC -0.55522782721  
GAACCCTA -0.634799180304  
GAACCCTC -0.619499470089  
GAACCGAA -0.0342660814291  
GAACCGAC 0.153173273346  
GAACCGCA 0.0717811360699  
GAACCGCC -0.667471356773  
GAACCGGA -0.057173041552  
GAACCGGC -0.874025024745  
GAACCGTA 1.66278371423  
GAACCGTC -0.820579023339  
GAACCTAA -0.566788996488  
GAACCTAC -0.568170920975  
GAACCTCA -0.637597531648  
GAACCTCC -1.26710216639  
GAACCTGA 0.294435910223  
GAACCTGC -0.672709443914  
GAACCTTA -0.111618827554  
GAACCTTC -1.23208905636  
GAACGAAA 0.830858377281  
GAACGAAC 0.146200657948  
GAACGACA 0.383086875742  
GAACGACC -0.460882663669  
GAACGAGA 1.35189226438  
GAACGAGC -1.46774024612  
GAACGATA 1.43848563399

GAACGATC 1.08455221571  
GAACGCAA 0.266099008869  
GAACGCAC -0.228939955959  
GAACGCCA -0.647053272187  
GAACGCCC -1.3351450229  
GAACGCGA 1.92639280203  
GAACGCGC 0.319964004969  
GAACGCTA -0.257942334851  
GAACGCTC -1.21730374512  
GAACGGAA -0.907746909695  
GAACGGAC -1.50117670238  
GAACGGCA -0.676543911896  
GAACGGCC -0.834660433946  
GAACGGGA -0.149985986191  
GAACGGGC -1.39843962138  
GAACGGTA -0.467258806269  
GAACGGTC -1.36581240255  
GAACGTAA 0.663496788257  
GAACGTAC -0.49285486023  
GAACGTCA -0.109410675849  
GAACGTCC -1.28528648387  
GAACGTGA 0.435042479299  
GAACGTGC -0.258696159368  
GAACGTTA 0.740264300993  
GAACGTTC 0.253367895577  
GAACTAAA 0.910658177888  
GAACTAAC 0.681231006638  
GAACTACA 0.349478430403  
GAACTACC -0.150476338061  
GAACTAGA 1.59181730459  
GAACTAGC 0.557801913147  
GAACTATA 0.682851572519  
GAACTATC 1.08422601148  
GAACTCAA 0.864874316525  
GAACTCAC -0.923296762096  
GAACTCCA -0.37728446574  
GAACTCCC -0.605666633378  
GAACTCGA -0.614303204003  
GAACTCGC -0.106369762386  
GAACTCTA -0.658373709017  
GAACTCTC -0.246253872737  
GAACTGAA 0.747987342947  
GAACTGAC -1.0526772531  
GAACTGCA -0.553656401068  
GAACTGCC -1.26264561021  
GAACTGGA -0.493266797622  
GAACTGGC 0.0629155951692  
GAACTGTA 0.902682379933  
GAACTGTC -0.0409428128627  
GAACTTAA 1.66566204834  
GAACTTAC -0.209082796273  
GAACTTCA -0.442544653806  
GAACTTCC -1.18947496959  
GAACTTGA 0.884561578175

GAACTTGC -0.251541099617  
GAACTTTA 0.445072736582  
GAAGAAAA 0.0427638584272  
GAAGAAAC 0.157940612237  
GAAGAACA -0.504475885893  
GAAGAACC -0.368930448619  
GAAGAAGA 1.82364892512  
GAAGAAGC -1.11280024732  
GAAGAATA 2.06948354178  
GAAGAATC 9.53307655729  
GAAGACAA -0.239856819608  
GAAGACAC 0.368364034705  
GAAGACCA -0.840689984553  
GAAGACCC -1.29910494459  
GAAGACGA 0.0401670322921  
GAAGACGC -0.29497331078  
GAAGACTA 0.737867693159  
GAAGACTC 0.213814848649  
GAAGAGAA -0.59109460952  
GAAGAGAC -0.328751131392  
GAAGAGCA -0.173625860303  
GAAGAGCC -0.804345658071  
GAAGAGGA 0.495535589857  
GAAGAGGC -0.68969506541  
GAAGAGTA 0.301401206936  
GAAGAGTC 0.0781410730117  
GAAGATAA 1.93271144068  
GAAGATAC 2.98264000494  
GAAGATCA 4.37135048063  
GAAGATCC 5.66109822555  
GAAGATGA -0.686011414608  
GAAGATGC -0.00394163443545  
GAAGATTA 4.79992585654  
GAAGATTC 8.10080474793  
GAAGCAAA -0.0993124593515  
GAAGCAAC -0.305715571525  
GAAGCACA -0.928329926067  
GAAGCACC -0.976637426719  
GAAGCAGA -0.196551117137  
GAAGCAGC -1.06678297219  
GAAGCATA 0.545159408215  
GAAGCATC -0.107391764418  
GAAGCCAA -0.260131928463  
GAAGCCAC -0.60519144164  
GAAGCCCA -1.59400219333  
GAAGCCCC -1.28743347228  
GAAGCCGA 0.051252748451  
GAAGCCGC -0.526024184491  
GAAGCCTA -0.575678845877  
GAAGCCTC -0.973470788709  
GAAGCGAA 1.44976294286  
GAAGCGAC -0.841972845416  
GAAGCGCA 0.401503038701  
GAAGCGCC -1.12101050456

GAAGCGGA -0.570787873493  
GAAGCGGC -1.04934881988  
GAAGCGTA 0.784422891605  
GAAGCGTC -0.726893586941  
GAAGCTAA -0.25002299532  
GAAGCTAC -0.769538778124  
GAAGCTCA -1.06455181891  
GAAGCTCC -0.569030343656  
GAAGCTGA 0.257254901259  
GAAGCTGC -1.10891036644  
GAAGCTTA -0.399727734916  
GAAGCTTC -0.304050832153  
GAAGGAAA -1.02872528936  
GAAGGAAC 0.150953098088  
GAAGGACA 0.327136315905  
GAAGGACC -1.39904550392  
GAAGGAGA -1.09990106566  
GAAGGAGC -0.800392784227  
GAAGGATA 0.565274812915  
GAAGGATC 3.34189253867  
GAAGGCAA -0.135502309311  
GAAGGCAC -1.39388452434  
GAAGGCCA -1.2332459313  
GAAGGCCC -1.59939527976  
GAAGGCCG -0.920561403716  
GAAGGCCG -0.814076110666  
GAAGGCTA -1.10835257812  
GAAGGCTC -1.72638360641  
GAAGGGAA -0.757083422413  
GAAGGGAC -0.521723934509  
GAAGGGCA -1.46737744847  
GAAGGGCC -0.994703599723  
GAAGGGGA -0.657867674252  
GAAGGGGC -1.22357272127  
GAAGGGTA -0.235448096265  
GAAGGGTC -1.62497695773  
GAAGGTAA -0.0894787610271  
GAAGGTAC -0.709493675619  
GAAGGTCA -0.993731260194  
GAAGGTCC -1.49271212084  
GAAGGTGA -0.329838478822  
GAAGGTGC -0.695896605106  
GAAGGTTA -0.110475544462  
GAAGTAAA -0.0840624116391  
GAAGTAAC -0.743125122538  
GAAGTACA -0.0438177490136  
GAAGTACC -0.646789015396  
GAAGTAGA 0.0845768106158  
GAAGTAGC 0.646170325163  
GAAGTATA -0.487309126953  
GAAGTATC 1.91085288213  
GAAGTCAA -0.107859114708  
GAAGTCAC -0.471815732977  
GAAGTCCA -0.553628171856

GAAGTCCC -0.756682463048  
GAAGTCGA 0.515718169627  
GAAGTCGC -0.702758394708  
GAAGTCTA -0.961323079134  
GAAGTCTC -0.867969335978  
GAAGTGAA -0.580035031521  
GAAGTGAC 0.211251217976  
GAAGTGCA -0.474074069948  
GAAGTGCC -2.06325272734  
GAAGTGGA 0.0632802224927  
GAAGTGGC -1.04721490055  
GAAGTGTA 1.31389888142  
GAAGTGTC -0.880309422406  
GAAGTTAA 2.00311117503  
GAAGTTAC -0.265608656999  
GAAGTTCA -0.162152776622  
GAAGTTCC -0.314692983747  
GAAGTTGA 0.101060579451  
GAAGTTGC 0.626005780723  
GAAGTTTA 0.317606342993  
GAATAAAA 1.34947108668  
GAATAAAC 0.302100664081  
GAATAACA 0.478870422195  
GAATAACC 0.263563084645  
GAATAAGA 1.58010767056  
GAATAAGC 0.233227136862  
GAATAATA 3.71936650606  
GAATAATC 3.20881558916  
GAATACAA 2.7616606868  
GAATACAC 1.14154725639  
GAATACCA 1.02098264379  
GAATACCC 0.223170741419  
GAATACGA 2.86128575854  
GAATACGC 2.52135376809  
GAATACTA 0.165939673154  
GAATACTC 1.14570688308  
GAATAGAA 1.39395431323  
GAATAGAC -0.794021346495  
GAATAGCA 0.403904612786  
GAATAGCC -0.545517500998  
GAATAGGA 1.10462684488  
GAATAGGC 0.141667255584  
GAATAGTA 0.650523896991  
GAATAGTC -0.257160019741  
GAATATAA 1.7753409017  
GAATATAC 2.96716621458  
GAATATCA 6.38841315962  
GAATATCC 11.0949442361  
GAATATGA 4.28150500123  
GAATATGC 2.29780010264  
GAATATTA 3.01665254622  
GAATATTC 6.80749437189  
GAATCAAA 3.29547900904  
GAATCAAC 0.250749636151



GAATCACA 4.08761370319  
GAATCACC 3.53815639743  
GAATCAGA 5.48295281611  
GAATCAGC 1.95095038692  
GAATCATA 4.96730469675  
GAATCATC 2.82412644425  
GAATCCAA 8.88371868359  
GAATCCAC 9.77928076753  
GAATCCCA 6.16608955595  
GAATCCCC 5.13189198154  
GAATCCGA 13.0864986853  
GAATCCGC 7.08196177387  
GAATCCTA 6.30176960474  
GAATCCTC 9.02624353219  
GAATCGAA 2.65472163531  
GAATCGAC 1.53333500263  
GAATCGCA 5.09348979776  
GAATCGCC 4.19392622301  
GAATCGGA 4.1099939794  
GAATCGGC 2.67144535245  
GAATCGTA 8.1828587034  
GAATCGTC 4.76052153574  
GAATCTAA 8.29309011745  
GAATCTAC 8.61105978086  
GAATCTCA 13.5588596603  
GAATCTCC 12.5237362723  
GAATCTGA 10.0013348868  
GAATCTGC 14.8842073169  
GAATCTTA 10.2031301028  
GAATGAAA 0.783687102418  
GAATGAAC -0.788777508959  
GAATGACA 0.478695035146  
GAATGACC -0.737388319316  
GAATGAGA 1.30250813295  
GAATGAGC -0.359985970477  
GAATGATA 1.11112165472  
GAATGATC -0.436354092137  
GAATGCAA 1.10474995561  
GAATGCAC -0.521011931047  
GAATGCCA 1.08708683302  
GAATGCCC -0.974003223016  
GAATGCGA 2.43934189506  
GAATGCGC -0.00183646707848  
GAATGCTA -0.762568776542  
GAATGCTC -1.23329010479  
GAATGGAA 0.417185150188  
GAATGGAC -0.335723224026  
GAATGGCA -0.93487361427  
GAATGGCC -0.884222043484  
GAATGGGA -0.663332379235  
GAATGGGC -0.765864537059  
GAATGGTA 1.84840803522  
GAATGGTC -0.410851874169  
GAATGTAA 0.703994729647

GAATGTAC 1.03813973161  
GAATGTCA 0.73626568537  
GAATGTCC -0.0899570893439  
GAATGTGA 0.174802338857  
GAATGTGC 0.99037538191  
GAATGTTA 1.4746407202  
GAATTAAA 2.47378231801  
GAATTAAC 0.704043869387  
GAATTACA 3.83647042636  
GAATTACC 2.29681181883  
GAATTAGA 1.9061670943  
GAATTAGC -0.183779489698  
GAATTATA 2.17641632012  
GAATTATC 1.65774636815  
GAATTCAA 1.13113721165  
GAATTCAC 1.31832537872  
GAATTCCA 1.63025608178  
GAATTCCC 1.85090919569  
GAATTCGA 2.67046203489  
GAATTCGC 2.61635865878  
GAATTCTA 3.29874627897  
GAATTCTC 2.58334930005  
GAATTGAA 0.524407277952  
GAATTGAC 0.69756997007  
GAATTGCA 0.145237466775  
GAATTGCC 0.266921838127  
GAATTGGA 2.20895963546  
GAATTGGC -0.207316902225  
GAATTGTA 0.461932110768  
GAATTGTC 0.508868142196  
GAATTTAA 2.47003149214  
GAATTTAC 3.02500081295  
GAATTTCA 1.03324928199  
GAATTTCC 5.10959665434  
GAATTTGA 3.32449628669  
GAATTTGC 3.73187413809  
GAATTTTA 2.80438324694  
GACAAAAA 0.989644297592  
GACAAAAC 0.0907976925498  
GACAAACA -0.00525952043171  
GACAAACC 0.168315109079  
GACAAAGA 0.0139630047442  
GACAAAGC -1.03972213578  
GACAAATA 2.50988199132  
GACAAATC 3.5460454167  
GACAACAA 0.643009960312  
GACAACAC -0.190274299542  
GACAACCA -0.308815557228  
GACAACCC -0.868987940049  
GACAACGA -0.791183265149  
GACAACGC -0.440433213291  
GACAAC TA 0.331455646743  
GACAAC TC -0.449209623068  
GACAAGAA -0.681540743826

GACAAGAC -1.00442255153  
GACAAGCA -0.621771921666  
GACAAGCC -1.16199069499  
GACAAGGA 0.251161573543  
GACAAGGC -1.44155529943  
GACAAGTA -0.701902892751  
GACAAGTC -0.739441994499  
GACAATAA 0.831759359635  
GACAATAC 0.987383608187  
GACAATCA 3.06342782797  
GACAATCC 6.25939389798  
GACAATGA -0.486040119315  
GACAATGC -0.991622172113  
GACAATTA 1.74639733367  
GACACAAA 0.878609135138  
GACACAAC -0.226769443204  
GACACACA 0.155877527316  
GACACACC -0.114473114559  
GACACAGA -0.147523248813  
GACACAGC -0.309001399541  
GACACATA 0.83428718103  
GACACATC 0.368364034705  
GACACCAA 0.103446993403  
GACACCAC -0.526487875439  
GACACCCA -1.29338722223  
GACACCCC -1.044274619  
GACACCGA -0.457454121302  
GACACCGC -1.05466688979  
GACACCTA -0.453166156255  
GACACCTC -1.6704270348  
GACACGAA 0.372075653338  
GACACGAC -0.388156894519  
GACACGCA -0.369545218128  
GACACGCC -0.481529718531  
GACACGGA -0.751441239328  
GACACGGC -1.08252389454  
GACACGTA 0.670899114995  
GACACGTC -0.917034320488  
GACACTAA 0.980962507952  
GACACTAC -0.840589091258  
GACACTCA 0.41980105718  
GACACTCC -0.338207133313  
GACACTGA 0.216059071014  
GACACTGC -0.61423550617  
GACACTTA 0.140482674201  
GACAGAAA -0.0664667255034  
GACAGAAC -0.738422344901  
GACAGACA -0.222870152586  
GACAGACC -0.429865032688  
GACAGAGA 0.731248727058  
GACAGAGC -0.185715543164  
GACAGATA 1.29196530636  
GACAGATC 2.154966301  
GACAGCAA -0.284123883582

GACAGCAC 0.255529259976  
GACAGCCA -0.282426471511  
GACAGCCC -0.809523366064  
GACAGCGA -0.501792019687  
GACAGCGC -0.663493128915  
GACAGCTA -0.5338841904  
GACAGCTC -0.716610050893  
GACAGGAA -0.0901123500107  
GACAGGAC -0.212367840145  
GACAGGCA -1.29390789436  
GACAGGCC -1.31289047124  
GACAGGGA -0.00297243148541  
GACAGGGC -1.5511758647  
GACAGGTA 0.310143898488  
GACAGGTC -0.345126688247  
GACAGTAA -0.316734896759  
GACAGTAC 0.196084812374  
GACAGTCA -0.676223196681  
GACAGTCC -1.01712491284  
GACAGTGA -0.755284594284  
GACAGTGC -0.924983457521  
GACAGTTA 1.1516141071  
GACATAAA 0.343515270721  
GACATAAC 1.1463966691  
GACATACA 0.198725027853  
GACATACC -0.305128508465  
GACATAGA 0.92313679656  
GACATAGC -0.942451066676  
GACATATA 1.63006710289  
GACATATC 2.23025648497  
GACATCAA 1.78799020256  
GACATCAC -0.505824092154  
GACATCCA 1.36110282899  
GACATCCC 0.0583142335909  
GACATCGA 0.916629701781  
GACATCGC -0.527812034593  
GACATCTA 0.505310738704  
GACATCTC 0.259412867698  
GACATGAA 0.300337645231  
GACATGAC -0.0817805503247  
GACATGCA 0.344533874792  
GACATGCC -0.629999691477  
GACATGGA 0.155208390436  
GACATGGC -0.388109323068  
GACATGTA 0.326268529013  
GACATGTC -0.599311924068  
GACATTAA -1.13045526708  
GACATTAC 1.49075646375  
GACATTCA 0.671717762147  
GACATTCC 1.23518459858  
GACATTGA -0.152438268304  
GACATTGC -0.126488042284  
GACATTTA -0.0262325181417  
GACCAAAA 0.185226498202

GACCAAAC 0.288255281055  
GACCAACA -0.788756075668  
GACCAACC -0.491422750477  
GACCAAGA -0.287740097933  
GACCAAGC -0.556585965972  
GACCAATA -0.475576229968  
GACCAATC -0.0260291632617  
GACCACAA 0.571957033362  
GACCACAC -0.0954000996545  
GACCACCA -1.30862106428  
GACCACCC -0.895203207006  
GACCACGA -0.320358168413  
GACCACGC -1.09420137862  
GACCACTA -0.663502277271  
GACCACTC -0.362789810834  
GACCAGAA -0.473663439464  
GACCAGAC -1.09589748379  
GACCAGCA -1.40236635707  
GACCAGCC -1.07285382109  
GACCAGGA -0.970520313277  
GACCAGGC -0.754070738163  
GACCAGTA -0.396728381126  
GACCAGTC -0.737388319316  
GACCATAA 0.795641912377  
GACCATAC 0.258153531179  
GACCATCA -0.887962936856  
GACCATCC -0.690953356403  
GACCATGA -0.814076110666  
GACCATGC -1.07948716318  
GACCATTA 0.515329495197  
GACCCAAA 0.0247010833832  
GACCCAAC -1.19873781051  
GACCCACA -1.41566257736  
GACCCACC -0.448583091388  
GACCCAGA 0.278849987163  
GACCCAGC -1.24059127685  
GACCCATA -0.380946683252  
GACCCATC -0.790350503391  
GACCCCAA -0.527695197021  
GACCCCAC -1.25717175687  
GACCCCCA -0.824402251913  
GACCCCCC -1.38211686361  
GACCCCGA -0.759122721609  
GACCCCGC -0.815092100921  
GACCCCTA -0.968841720682  
GACCCCTC -1.12729019736  
GACCCGAA -0.585096686086  
GACCCGAC -1.06498153025  
GACCCGCA -1.4099945175  
GACCCGCC -1.33493121276  
GACCCGGA -0.35087185568  
GACCCGGC -1.55363964761  
GACCCGTA -0.730031472975  
GACCCGTC -1.52688436628

GACCCTAA -0.624343916549  
GACCCTAC -0.471632765861  
GACCCTCA -1.36360738742  
GACCCTCC -0.787171057683  
GACCCTGA -1.28528648387  
GACCCTGC -0.791432361808  
GACCCTTA -1.15732059006  
GACCGAAA 0.539168542083  
GACCGAAC -0.24877829617  
GACCGACA -0.442911894946  
GACCGACC -1.32831616738  
GACCGAGA 0.0670469926418  
GACCGAGC -1.12197160468  
GACCGATA -0.289068700575  
GACCGATC -0.0510415521232  
GACCGCAA 0.112097678634  
GACCGCAC -1.3514432108  
GACCGCCA -0.999263401628  
GACCGCCC -0.873023671858  
GACCGCGA -0.183727213379  
GACCGCGC 0.393037934402  
GACCGCTA -0.466887121643  
GACCGCTC -0.836116329423  
GACCGGAA -1.15302086284  
GACCGGAC -0.716883717422  
GACCGGCA 0.224046108377  
GACCGGCC -1.31552937981  
GACCGGGA -0.681457363098  
GACCGGGC -1.66938307671  
GACCGGTA 0.024243665594  
GACCGGTC -0.841569533616  
GACCGTAA 0.0586895775596  
GACCGTAC 0.448761876398  
GACCGTCA -1.27282877573  
GACCGTCC -0.951586092  
GACCGTGA 0.132603587435  
GACCGTGC -0.0737545671035  
GACCGTTA 0.369902004003  
GACCTAAA 0.163888089023  
GACCTAAC -0.0287274054551  
GACCTACA -1.03427625027  
GACCTACC -0.1568391502  
GACCTAGA -0.455518067836  
GACCTAGC -0.0112198049166  
GACCTATA 0.139217848668  
GACCTATC -0.409214841247  
GACCTCAA 0.129279336325  
GACCTCAC -0.346669101033  
GACCTCCA -0.371138861705  
GACCTCCC -1.24210310799  
GACCTCGA 0.592717005073  
GACCTCGC -1.69370358849  
GACCTCTA -0.534653436431  
GACCTCTC -1.27974362579

GACCTGAA -1.09826560103  
GACCTGAC -1.21237827037  
GACCTGCA 0.129213990926  
GACCTGCC -1.48673353964  
GACCTGGA 0.306351251561  
GACCTGGC -1.09045630315  
GACCTGTA -0.592621600792  
GACCTTAA -0.449650051054  
GACCTTAC -0.972815243672  
GACCTTCA -1.41356054659  
GACCTTCC -0.934296222329  
GACCTTGA -0.0304028614718  
GACCTTGC -0.397950340077  
GACCTTTA -0.463980819701  
GACGAAA 1.49075960033  
GACGAAAC -0.116730406003  
GACGAACA -0.0246634444337  
GACGAACC -0.183905475626  
GACGAAGA -0.414430972334  
GACGAAGC -1.41963662312  
GACGAATA 1.9107909347  
GACGAATC 2.4684046531  
GACGACAA -0.0120700792414  
GACGACAC -1.41139996633  
GACGACCA -0.295945650309  
GACGACCC -1.10943234548  
GACGACGA -0.681413189608  
GACGACGC -0.74233496598  
GACGACTA -0.404194223592  
GACGACTC -1.24994141922  
GACGAGAA 0.586390786357  
GACGAGAC -0.453895410901  
GACGAGCA -1.14423765714  
GACGAGCC -1.29061474766  
GACGAGGA -0.735101753133  
GACGAGGC -1.34991151466  
GACGAGTA 0.652722116195  
GACGAGTC -0.87004418307  
GACGATAA 0.316230953046  
GACGATAC 1.90140236923  
GACGATCA 0.293598443596  
GACGATCC 4.00946870946  
GACGATGA -0.48243148503  
GACGATGC 0.320628175599  
GACGATTA 1.9562959019  
GACGCAA 0.59640300831  
GACGCAAC 0.647721363541  
GACGCACA -0.452076979153  
GACGCACC -0.756611890018  
GACGCAGA -0.727156536824  
GACGCAGC -0.735373067227  
GACGCATA -0.397691049536  
GACGCATC -0.209176632266  
GACGCCAA -0.970412624061

GACGCCAC -1.17774285675  
GACGCCCA -0.671506565819  
GACGCCCC -1.17853039949  
GACGCCGA -0.761473064901  
GACGCCGC -0.927557804839  
GACGCCTA -1.31119802542  
GACGCCTC -0.907369997437  
GACGCGAA 0.508868142196  
GACGCGAC -0.543817475112  
GACGCGCA 0.0748565519033  
GACGCGCC -0.999404024926  
GACGCGGA -0.401862699774  
GACGCGGC -0.973795947412  
GACGCGTA -0.00211353156798  
GACGCGTC 0.0112482955103  
GACGCTAA -0.351404551369  
GACGCTAC -1.12757771711  
GACGCTCA -0.600764160204  
GACGCTCC -0.789719528223  
GACGCTGA 0.180083031197  
GACGCTGC -1.13907380237  
GACGCTTA -0.825714910277  
GACGAAA -0.131081301033  
GACGGAAC 0.0650887217406  
GACGGACA -0.596103465003  
GACGGACC -1.31189617565  
GACGGAGA -0.559547419431  
GACGGAGC -0.921772123259  
GACGGATA 2.3133959582  
GACGGATC 0.776823221764  
GACGGCAA -0.246805649281  
GACGGCAC -0.853950656954  
GACGGCCA -1.42124516545  
GACGGCCC -0.403751443172  
GACGGCGA -0.559393988435  
GACGGCGC -1.00779254442  
GACGGCTA -0.575565406266  
GACGGCTC -0.57306032507  
GACGGGAA -0.350748222186  
GACGGGAC -1.04983185307  
GACGGGCA -0.45256523997  
GACGGGCC -0.998717375479  
GACGGGGA 0.0854751791539  
GACGGGGC -1.02654850345  
GACGGGTA -0.36498175688  
GACGGTAA 0.147036817667  
GACGGTAC -0.61269727549  
GACGGTCA -1.0245227961  
GACGGTCC -1.25417580104  
GACGGTGA 0.623115423058  
GACGGTGC -0.896310419437  
GACGGTTA -0.00468291263565  
GACGTAAA 1.36946730137  
GACGTAAC 0.470539668036



GACGTACA 0.809056015774  
GACGTACC -0.483571631542  
GACGTAGA 0.224060745747  
GACGTAGC 0.481763393676  
GACGTATA 0.552995105636  
GACGTATC 2.56444121693  
GACGTCAA 0.577483685783  
GACGTCC -0.0530113238146  
GACGTCCA -1.01307114571  
GACGTCCC -1.34906542244  
GACGTCCA 0.142469697077  
GACGTCCG -0.700252790749  
GACGTCTA 0.211640676551  
GACGTCTC -0.989011492754  
GACGTGAA 2.03417402503  
GACGTGAC -1.18867200533  
GACGTGCA 0.295260830533  
GACGTGCC -1.51654750838  
GACGTGGA 0.285095177585  
GACGTGGC -1.27560098891  
GACGTGTA -0.454358317704  
GACGTTAA -0.425139776234  
GACGTTAC 0.523264779005  
GACGTTCA -0.371975544187  
GACGTTCC -1.53892334111  
GACGTTGA -1.00238638891  
GACGTTGC -0.370264278892  
GACGTTTA -0.295404067647  
GACTAAAA 1.86294817052  
GACTAAAC 0.071341492229  
GACTAACA -0.352385777872  
GACTAACC -0.411052876615  
GACTAAGA 0.873769916309  
GACTAAGC -1.16422916696  
GACTAATA 0.947999152387  
GACTAATC 0.336957990676  
GACTACAA -0.55250213995  
GACTACAC -0.570226948593  
GACTACCA 0.266848389899  
GACTACCC -0.480279791749  
GACTACGA 0.358541314407  
GACTACGC -0.58947430502  
GACTACTA 0.373243506299  
GACTACTC 0.00893088629911  
GACTAGAA 0.624689463016  
GACTAGAC -1.16250143463  
GACTAGCA -0.406595797676  
GACTAGCC -0.571311159444  
GACTAGGA 0.902066564897  
GACTAGGC -0.293710837682  
GACTAGTA -0.139626910863  
GACTAGTC -0.105629006949  
GACTATAA 0.361927774338  
GACTATAC -0.016789062537

GACTATCA -0.0375694220123  
GACTATCC 0.0866615902085  
GACTATGA 0.212161348686  
GACTATGC -1.40470598371  
GACTATTA 0.63682227384  
GACTCAAA 0.180572860304  
GACTCAAC -0.60096202607  
GACTCACA -0.419808114483  
GACTCACC -0.771860369441  
GACTCAGA -0.0149123426931  
GACTCAGC -0.402215042163  
GACTCATA 0.0234924548932  
GACTCATC -0.856666150333  
GACTCCAA -0.217868615788  
GACTCCAC -0.753044554025  
GACTCCCA -1.08612416461  
GACTCCCC -1.7462407661  
GACTCCGA 1.08434154214  
GACTCCGC -0.316919954927  
GACTCCTA -0.678689332019  
GACTCCTC -1.21819714741  
GACTCGAA -0.923671844683  
GACTCGAC -0.624215055423  
GACTCGCA -0.350138157546  
GACTCGCC -0.457749221121  
GACTCGGA -0.400924078471  
GACTCGGC -1.40963250399  
GACTCGTA -1.36311808108  
GACTCTAA -0.912373102525  
GACTCTAC -0.726420747637  
GACTCTCA 0.155210481489  
GACTCTCC -1.24274453842  
GACTCTGA 0.877766440879  
GACTCTGC -1.30724070808  
GACTCTTA -0.757151381628  
GACTGAAA 0.567385207904  
GACTGAAC -0.590530809422  
GACTGACA 0.0090764758469  
GACTGACC -0.962838308234  
GACTGAGA -0.393238414085  
GACTGAGC -0.548486795905  
GACTGATA 0.326043740842  
GACTGATC 0.0187311277794  
GACTGCAA 0.176422120594  
GACTGCAC -0.959364024088  
GACTGCCA -0.415123110794  
GACTGCCC -1.52212852818  
GACTGCGA 0.385367952912  
GACTGCGC -0.759849885203  
GACTGCTA -0.232742012624  
GACTGCTC -1.02902953754  
GACTGGAA 1.15769750231  
GACTGGAC -1.09194879205  
GACTGGCA -0.776102069946

GACTGGCC -1.15733653433  
GACTGGGA -0.556637196764  
GACTGGGC -1.38982134747  
GACTGGTA -0.862962310166  
GACTGTAA -0.295404067647  
GACTGTAC -0.623793446913  
GACTGTCA 0.10932389716  
GACTGTCC -0.398878506117  
GACTGTGA -1.16250143463  
GACTGTGC -0.281205296705  
GACTGTTA 0.0662853266773  
GACTTAAA 0.286249961466  
GACTTAAC 0.724842786955  
GACTTACA -0.314756760856  
GACTTACC 0.0527415780097  
GACTTAGA 0.368510408397  
GACTTAGC -1.24216139608  
GACTTATA -0.447586966134  
GACTTATC -0.298302266759  
GACTTCAA -0.634392470544  
GACTTCAC -0.824307631776  
GACTTCCA -0.422690107937  
GACTTCCC -1.26649523833  
GACTTCGA 0.629914481078  
GACTTCGC -0.28628002035  
GACTTCTA -0.268390802684  
GACTTCTC -0.19067734996  
GACTTGAA 0.539560091711  
GACTTGAC -0.295529008049  
GACTTGCA 0.158235189293  
GACTTGCC -0.694170963823  
GACTTGGA 0.556189188713  
GACTTGGC -0.637395222294  
GACTTGTA -1.26709746152  
GACTTTAA -0.281697216864  
GACTTTAC 0.547679910924  
GACTTTCA -1.05607521382  
GACTTTCC -0.588758903597  
GACTTTGA -0.728314195903  
GACTTTGC -0.262185080883  
GACTTTTA 0.644274263081  
GAGAAAAA 1.14330687728  
GAGAAAAC -0.0500707808836  
GAGAAACA 0.782254208521  
GAGAAACC 0.0890056603423  
GAGAAAGA 0.56158253652  
GAGAAAGC 0.670855202888  
GAGAAATA 2.02267271213  
GAGAAATC 12.4818106646  
GAGAACAA 0.816207416182  
GAGAACAC 0.228275523948  
GAGAACCA 0.598478900928  
GAGAACCC -1.0941747177  
GAGAACGA -0.862218940913

GAGAACGC -1.69607144435  
GAGAACTA 0.722430496225  
GAGAACTC -0.432022476364  
GAGAAGAA 0.197897232346  
GAGAAGAC -0.685700631893  
GAGAAGCA 0.00381094363852  
GAGAAGCC -1.17370738632  
GAGAAGGA -0.754710077541  
GAGAAGGC -0.607602425462  
GAGAAGTA 0.769489638385  
GAGAATAA 1.17850347719  
GAGAATAC 1.78377307192  
GAGAATCA 13.5424582267  
GAGAATCC 25.936001634  
GAGAATGA 0.80181835944  
GAGAATGC 0.194081061075  
GAGAATTA 4.64166086974  
GAGACAAA 0.407008257831  
GAGACAAC -0.898392585214  
GAGACACA -0.0219246880932  
GAGACACC -0.803176498202  
GAGACAGA 0.825212796235  
GAGACAGC -1.22294645097  
GAGACATA 0.379550644159  
GAGACATC 0.690073545958  
GAGACCAA -0.555630877628  
GAGACCAC -0.791561222934  
GAGACCCA -0.240215696537  
GAGACCCC -1.39365686098  
GAGACCGA -0.898725062601  
GAGACCGC -0.665857586813  
GAGACCTA -0.0957973996772  
GAGACCTC -0.76830976187  
GAGACGAA -0.236777483051  
GAGACGAC -1.33525114383  
GAGACGCA -0.415565107069  
GAGACGCC -1.60398827712  
GAGACGGA -0.21813130429  
GAGACGGC -1.43931578194  
GAGACGTA -0.575685641799  
GAGACTAA 0.506445134821  
GAGACTAC -0.566402935874  
GAGACTCA -0.180301023447  
GAGACTCC -1.10089588401  
GAGACTGA -0.336563565851  
GAGACTGC 0.0292360540368  
GAGACTTA -0.944945953989  
GAGAGAAA 1.02123722946  
GAGAGAAC -0.189191134217  
GAGAGACA -0.257441527717  
GAGAGACC -0.925131922266  
GAGAGAGA -0.189191134217  
GAGAGAGC -0.823197282765  
GAGAGATA 0.990197381045

GAGAGATC 3.7596563877  
GAGAGCAA 0.00842798811252  
GAGAGCAC -0.244005991029  
GAGAGCCA -1.10706292133  
GAGAGCCC -1.89420836362  
GAGAGCGA 0.249395156732  
GAGAGCGC -0.894002419964  
GAGAGCTA -0.0639532800969  
GAGAGCTC -0.886925251928  
GAGAGGAA -1.02361998407  
GAGAGGAC 0.563475462023  
GAGAGGCA -1.31325222336  
GAGAGGCC -1.04286864741  
GAGAGGGA 0.076128434739  
GAGAGGGC -1.44156183397  
GAGAGGTA -0.669895932438  
GAGAGTAA 0.275220703732  
GAGAGTAC -1.12161298914  
GAGAGTCA -0.535566965102  
GAGAGTCC -1.33219637714  
GAGAGTGA 0.47565856517  
GAGAGTGC -0.186907704613  
GAGAGTTA 0.637087053395  
GAGATAAA 0.0633458292727  
GAGATAAC 2.43894903852  
GAGATACA 2.53170291092  
GAGATACC 3.73557974495  
GAGATAGA 0.322767061182  
GAGATAGC 0.63727655505  
GAGATATA 3.77753645701  
GAGATATC 15.2279672408  
GAGATCAA 2.74270137289  
GAGATCAC 4.63870098458  
GAGATCCA 6.97217000366  
GAGATCCC 5.4892027114  
GAGATCGA 3.54092129193  
GAGATCGC 9.04034271674  
GAGATCTA 11.0905694924  
GAGATCTC 11.3470313619  
GAGATGAA 0.287821387609  
GAGATGAC -0.147518021181  
GAGATGCA -0.769674435171  
GAGATGCC 0.0320545317634  
GAGATGGA -0.397331649845  
GAGATGGC -0.331877516636  
GAGATGTA 0.733300833951  
GAGATTAA 2.23101266192  
GAGATTAC 15.7802942551  
GAGATTCA 2.47974129559  
GAGATTCC 15.6087939499  
GAGATTGA 0.755375032316  
GAGATTGC 19.025050859  
GAGATTTA 4.81818623607  
GAGCAAAA -0.0732223941784

GAGCAAAC -0.268934737781  
GAGCAACA -0.736425389524  
GAGCAACC -0.586036352916  
GAGCAAGA 0.392374547917  
GAGCAAGC 0.325352647908  
GAGCAATA 0.771992105764  
GAGCAATC 6.85217154358  
GAGCACAA 0.294435910223  
GAGCACAC -0.686138707444  
GAGCACCA -1.08929367782  
GAGCACCC -1.55091291482  
GAGCACGA -0.434787893627  
GAGCACGC -0.723190332519  
GAGCACTA 0.141480629126  
GAGCACTC -0.5178784885  
GAGCAGAA 0.345492099715  
GAGCAGAC -0.686958138741  
GAGCAGCA -0.513322607319  
GAGCAGCC -0.97905494508  
GAGCAGGA -1.32418424714  
GAGCAGGC -1.16913948159  
GAGCAGTA 0.109001352273  
GAGCATAA 0.811048266282  
GAGCATAC -0.325935006099  
GAGCATCA 1.40465998055  
GAGCATCC -0.791053097115  
GAGCATGA -0.396520059996  
GAGCATGC -0.217523853466  
GAGCATT A -0.145971164909  
GAGCCAAA -0.245538994077  
GAGCCAAC -1.03487298445  
GAGCCACA -1.05153344724  
GAGCCACC -1.26348830447  
GAGCCAGA -0.476679783057  
GAGCCAGC -1.17330485867  
GAGCCATA -0.108846091606  
GAGCCATC 0.285331989309  
GAGCCCAA -1.03567856252  
GAGCCCAC -1.08509876462  
GAGCCCCA -1.27336800595  
GAGCCCCC -0.998948698189  
GAGCCCGA -0.931104491686  
GAGCCCGC -1.25330330928  
GAGCCCTA -1.3689769495  
GAGCCCTC -1.3157907614  
GAGCCGAA -0.291110352204  
GAGCCGAC -1.17325963965  
GAGCCGCA -1.34720333997  
GAGCCGCC -0.909445105911  
GAGCCGGA -0.698148668919  
GAGCCGGC -0.567964690898  
GAGCCGTA -0.69534456718  
GAGCCTAA -0.00536956208273  
GAGCCTAC -0.0712656915668

GAGCCTCA -0.319743398904  
GAGCCTCC -1.2491180672  
GAGCCTGA -0.70568430027  
GAGCCTGC -1.42924135116  
GAGCCTTA -0.807510989173  
GAGCGAAA 0.214856192919  
GAGCGAAC -0.758256764388  
GAGCGACA -0.66407783954  
GAGCGACC -0.442500218935  
GAGCGAGA -0.0451055761266  
GAGCGAGC -0.667444695851  
GAGCGATA 0.0150121904619  
GAGCGATC 3.72825295749  
GAGCGCAA 2.20238196765  
GAGCGCAC -0.62337314531  
GAGCGCCA -0.938777871137  
GAGCGCCC -1.37609410892  
GAGCGCGA 0.525735096448  
GAGCGCGC 0.375075791272  
GAGCGCTA -0.649510781933  
GAGCGCTC -0.56839152704  
GAGCGGAA -0.0715511202673  
GAGCGGAC -0.739966587358  
GAGCGGCA -0.682951158907  
GAGCGGCC -0.899644080285  
GAGCGGGA -0.522085163872  
GAGCGGGC -1.31279323728  
GAGCGGTA 0.819296423858  
GAGCGTAA 1.57340689202  
GAGCGTAC -0.640163514755  
GAGCGTCA -1.7412264216  
GAGCGTCC -1.00799119443  
GAGCGTGA -0.166290970016  
GAGCGTGC -0.451378306153  
GAGCGTTA 1.52926999608  
GAGCTAAA 0.0674944779305  
GAGCTAAC -0.408428866794  
GAGCTACA -0.265317216522  
GAGCTACC -1.20745750048  
GAGCTAGA -0.155084234179  
GAGCTAGC -1.16773638519  
GAGCTATA 0.0353032435935  
GAGCTATC 0.286028048493  
GAGCTCAA -0.751441239328  
GAGCTCAC -1.4754970063  
GAGCTCCA -1.17376253784  
GAGCTCCC -1.23359931921  
GAGCTCGA 1.01094951131  
GAGCTCGC -0.150590823199  
GAGCTCTA -1.31214344264  
GAGCTGAA -0.378222825662  
GAGCTGAC -0.633224878964  
GAGCTGCA -0.748386734022  
GAGCTGCC -1.10791241151

GAGCTGGA 0.16000578821  
GAGCTGGC -1.44482021692  
GAGCTGTA -0.178364969981  
GAGCTTAA -0.79327274961  
GAGCTTAC -0.527105258763  
GAGCTTCA -1.29292666786  
GAGCTTCC -1.07692091869  
GAGCTTGA -0.96545003312  
GAGCTTGC -0.723622396293  
GAGCTTTA -0.923218608999  
GAGGAAAA 0.791593111488  
GAGGAAAC -0.102928150939  
GAGGAACA -0.724223051196  
GAGGAACC -0.817385463026  
GAGGAAGA -0.528467056867  
GAGGAAGC -1.41345364151  
GAGGAATA 2.75509216735  
GAGGAATC 6.82466139221  
GAGGACAA -0.173576459181  
GAGGACAC -0.506857594976  
GAGGACCA -0.968593930931  
GAGGACCC -1.27336800595  
GAGGACGA -0.41276414191  
GAGGACGC -0.0516667768957  
GAGGACTA -0.734341655458  
GAGGACTC -0.980735367347  
GAGGAGAA 0.992198779909  
GAGGAGAC -1.71251992667  
GAGGAGCA -1.31634698143  
GAGGAGCC -1.42454536945  
GAGGAGGA -0.983721129294  
GAGGAGGC -1.39962054342  
GAGGAGTA -0.0789341047675  
GAGGATAA 2.72113869831  
GAGGATAC 1.9887759629  
GAGGATCA 1.07108322217  
GAGGATCC 6.43539362592  
GAGGATGA -0.140201166224  
GAGGATGC -0.690854292779  
GAGGATTA 3.30664967422  
GAGGCAAA 0.164894669541  
GAGGCAAC -1.01804785125  
GAGGCACA -0.664095352107  
GAGGCACC -0.909211169384  
GAGGCAGA -0.214772550809  
GAGGCAGC -1.55169183197  
GAGGCATA 0.0388541125462  
GAGGCATC -0.253909216858  
GAGGCCAA -0.838589522065  
GAGGCCAC -0.599820049887  
GAGGCCCA -0.984229777876  
GAGGCCCC -1.44803730158  
GAGGCCGA -0.0882330163508  
GAGGCCGC -1.0509205074



GAGGCCTA -0.503964884877  
GAGGCCTC -0.875344217649  
GAGGCGAA -0.0748429600604  
GAGGCGAC -0.348655339764  
GAGGCGCA -0.925687096772  
GAGGCGCC -1.25594064956  
GAGGCGGA -0.956133870351  
GAGGCGGC -0.719496226453  
GAGGCGTA -1.19966989727  
GAGGCTAA -0.546897595814  
GAGGCTAC -1.22283823899  
GAGGCTCA -1.20224372183  
GAGGCTCC -0.685625353994  
GAGGCTGA 0.231994461265  
GAGGCTGC -1.38437415505  
GAGGCTTA -0.383944730133  
GAGGGAAA -0.0228860495955  
GAGGGAAC -0.788780645538  
GAGGGACA -1.22088049085  
GAGGGACC -1.11393150686  
GAGGGAGA -0.80673651551  
GAGGGAGC -1.1157230163  
GAGGGATA 1.18941642011  
GAGGGATC 1.55741399782  
GAGGGCAA 0.0247243463451  
GAGGGCAC -1.51321280201  
GAGGGCCA -1.48722702809  
GAGGGCCC -1.60176104456  
GAGGGCGA -1.06080308409  
GAGGGCGC -0.789327978596  
GAGGGCTA -1.21299094882  
GAGGGGAA -0.301799029722  
GAGGGGAC -1.09385635492  
GAGGGGCA -0.379292399144  
GAGGGGCC -0.878742962514  
GAGGGGGA -0.825087071689  
GAGGGGGC -1.21203455357  
GAGGGGTA 0.0913750844906  
GAGGGTAA 1.09400874039  
GAGGGTAC -0.426825164751  
GAGGGTCA -0.769911508277  
GAGGGTCC -1.65725941424  
GAGGGTGA -0.616938714613  
GAGGGTGC -0.594514003531  
GAGGGTTA -0.686358006601  
GAGGTAAA 0.418207413602  
GAGGTAAAC -0.0730294945622  
GAGGTACA -0.648314438378  
GAGGTACC -0.472156313194  
GAGGTAGA 1.15330210943  
GAGGTAGC -0.702640772991  
GAGGTATA -0.109738448367  
GAGGTATC 0.742082209978  
GAGGTCAA -0.5687030939

GAGGTCAC -0.842274479775  
GAGGTCCA 0.392914039527  
GAGGTCCC -0.807990101634  
GAGGTCGA -0.755319619418  
GAGGTCGC -0.939676762438  
GAGGTCTA -1.45392988823  
GAGGTGAA 0.712431604734  
GAGGTGAC -0.446336255207  
GAGGTGCA -1.48984581028  
GAGGTGCC -0.714955505404  
GAGGTGGA -1.16798992534  
GAGGTGGC -1.07014747607  
GAGGTGTA 0.788919700546  
GAGGTTAA -0.82671077415  
GAGGTTAC 0.301066115733  
GAGGTTCA -1.14227154479  
GAGGTTCC -1.10386465615  
GAGGTTGA -0.852736278069  
GAGGTTGC -0.512662618795  
GAGGTTTA -0.942522162469  
GAGTAAAA 2.37181422166  
GAGTAAAC 0.00411153247147  
GAGTAACA -0.306700980133  
GAGTAACC -0.315537246296  
GAGTAAGA 0.979254902  
GAGTAAGC 0.429143358107  
GAGTAATA 1.75000413828  
GAGTAATC 5.28219998985  
GAGTACAA 1.44690212132  
GAGTACAC 0.5968277534  
GAGTACCA -0.682470216774  
GAGTACCC -0.12424564959  
GAGTACGA -0.320161348073  
GAGTACGC -0.639980286257  
GAGTACTA -0.0712656915668  
GAGTACTC -0.30246450726  
GAGTAGAA 1.13826351943  
GAGTAGAC -0.0851769427554  
GAGTAGCA -0.35290697277  
GAGTAGCC -1.34925544686  
GAGTAGGA 1.6894205897  
GAGTAGGC -1.14263199001  
GAGTAGTA 1.59850684372  
GAGTATAA 0.539286947945  
GAGTATAC 0.898266860667  
GAGTATCA 4.25032452952  
GAGTATCC 3.28874398951  
GAGTATGA 0.694502395684  
GAGTATGC -0.0689650107776  
GAGTATTA 0.705739713168  
GAGTCAAA 0.715142654625  
GAGTCAAC 0.000475975882425  
GAGTCACA 0.135287976404  
GAGTCACC -1.1429202939

GAGTCAGA 0.372407085199  
GAGTCAGC -0.246903144616  
GAGTCATA 0.532066804178  
GAGTCATC -0.196391151602  
GAGTCCAA -0.127106993898  
GAGTCCAC -0.69395558539  
GAGTCCCA -0.870483304148  
GAGTCCCC -1.34727652682  
GAGTCCGA -0.525255199842  
GAGTCCGC -1.65584821502  
GAGTCCTA -1.31652106157  
GAGTCGAA -0.322183134701  
GAGTCGAC -0.829634065896  
GAGTCGCA -0.263241585285  
GAGTCGCC -1.3250227593  
GAGTCGGA -0.831922200368  
GAGTCGGC 0.344698022433  
GAGTCGTA -0.105609141948  
GAGTCTAA 0.0756297186579  
GAGTCTAC -0.0546094108794  
GAGTCTCA -0.476250855861  
GAGTCTCC -0.816474025408  
GAGTCTGA -0.251190064137  
GAGTCTGC -1.38266262838  
GAGTCTTA -0.579057987123  
GAGTGAAA -0.421761680515  
GAGTG AAC 0.63486086636  
GAGTGACA -0.669714010849  
GAGTGACC -0.988700710039  
GAGTGAGA 1.26357220796  
GAGTGAGC 0.0658953453393  
GAGTGATA 2.04411541257  
GAGTGATC 1.4072395555  
GAGTGCAA 0.70042843918  
GAGTGCAC -0.323829577361  
GAGTGCCA -0.394504807907  
GAGTGCCC -0.673182544599  
GAGTGCGA -0.449774468693  
GAGTGCGC -0.172497737344  
GAGTGCTA 1.55468752642  
GAGTGCAA 1.20728917074  
GAGTGAC -0.735101753133  
GAGTGCA -0.851976964539  
GAGTGCC -1.34612461813  
GAGTGGA 1.04867863747  
GAGTGGC -0.841915080083  
GAGTGGTA -0.286610145303  
GAGTGTA 0.320084763266  
GAGTGTA 0.501886117061  
GAGTGTA 0.803800677448  
GAGTGTA -0.98599828574  
GAGTGTA -0.514630299433  
GAGTGTA -0.0654996136061  
GAGTGTA -0.527376572858

GAGTTAAA 1.12400672177  
GAGTTAAC -0.116223848474  
GAGTTACA 1.47882674643  
GAGTTACC -0.0192463109009  
GAGTTAGA 0.257787858329  
GAGTTAGC -0.576490174345  
GAGTTATA 1.43690192292  
GAGTTATC 1.16542969262  
GAGTTCAA 0.114554404234  
GAGTTCAC -0.352615270911  
GAGTTCCA -1.0215519329  
GAGTTCCC -0.717078969473  
GAGTTCGA -1.54959607435  
GAGTTCGC -0.604767219314  
GAGTTCTA 0.0368710103935  
GAGTTGAA 0.0104416719116  
GAGTTGAC -0.723523594051  
GAGTTGCA -0.467613762474  
GAGTTGCC -0.838682573912  
GAGTTGGA -0.218823965513  
GAGTTGGC -0.787345399206  
GAGTTGTA 0.235504816071  
GAGTTTAA 0.0225844152361  
GAGTTTAC 0.665492698108  
GAGTTTCA -0.111832114934  
GAGTTTCC -0.724148818823  
GAGTTTGA 0.90513361652  
GAGTTTGC 0.544138451709  
GAGTTTTA -0.585592004206  
GATAAAAA 1.51779952622  
GATAAAAC 1.81826054356  
GATAAACA 0.0634746903985  
GATAAACC -0.32693374517  
GATAAAGA 1.52487198939  
GATAAAGC -0.697093994187  
GATAAATA 0.587028034683  
GATAAATC 1.70880517146  
GATAACAA 1.24414005475  
GATAACAC 1.85580147498  
GATAACCA 0.472241784975  
GATAACCC 0.201417519652  
GATAACGA 3.03053818202  
GATAACGC 2.50453438529  
GATAACTA 0.367968564353  
GATAAGAA -0.316064191589  
GATAAGAC -0.0625815494923  
GATAAGCA 0.627766708521  
GATAAGCC -0.363044396507  
GATAAGGA -0.238401446894  
GATAAGGC 0.167690407069  
GATAAGTA 1.36695777669  
GATAATAA 1.20652044747  
GATAATAC 1.28916042047  
GATAATCA 3.2328428308

GATAATCC 5.09032838739  
GATAATGA 1.1744815986  
GATAATGC 1.10202479111  
GATAATTA 2.16272044736  
GATACAAA 1.02937116328  
GATACAAC 0.490248362976  
GATACACA 3.46774490091  
GATACACC 1.06516554289  
GATACAGA 0.554394542689  
GATACAGC 0.69934109175  
GATACATA 2.53932375267  
GATACATC 1.08632908778  
GATACCAA 1.76060133224  
GATACCAC 1.3774904094  
GATACCCA 4.03683274852  
GATACCCC 4.77221836206  
GATACCGA 3.44456871775  
GATACCGC 1.84561334321  
GATACCTA 2.33036955614  
GATACGAA 3.23910710208  
GATACGAC 1.66837937139  
GATACGCA 10.1842089506  
GATACGCC 5.78004357918  
GATACGGA 6.51716790309  
GATACGGC 5.00176995095  
GATACGTA 4.70003365281  
GATACTAA 0.300880534801  
GATACTAC 1.59164505412  
GATACTCA 5.70311976025  
GATACTCC 4.12129428985  
GATACTGA 1.59065441788  
GATACTGC 3.59873837773  
GATACTTA 2.42067898787  
GATAGAAA 1.0145466448  
GATAGAAC 0.129676113584  
GATAGACA -0.757493791516  
GATAGACC -0.822772799057  
GATAGAGA 1.49257829346  
GATAGAGC -1.15821869721  
GATAGATA 1.94373233421  
GATAGATC 1.6599424963  
GATAGCAA 0.396489739731  
GATAGCAC 0.478103528599  
GATAGCCA 1.54988516239  
GATAGCCC -0.0104782653348  
GATAGCGA 1.12787830594  
GATAGCGC 1.42979208218  
GATAGCTA 1.17603315974  
GATAGGAA 1.29315171741  
GATAGGAC -0.893520955068  
GATAGGCA -0.461147704605  
GATAGGCC -0.556164618843  
GATAGGGA 0.121872827481  
GATAGGGC -0.379518494223

GATAGGTA 0.325032194074  
GATAGTAA 1.16686023409  
GATAGTAC 0.385720556682  
GATAGTCA 0.640894599073  
GATAGTCC -0.670728171433  
GATAGTGA 1.53236344725  
GATAGTGC 2.46278207363  
GATAGTTA 1.99783623309  
GATATAAA 3.85316565291  
GATATAAC 1.34621322649  
GATATACA 1.79796086484  
GATATACC 2.7929621782  
GATATAGA 2.87441234219  
GATATAGC 1.425875279  
GATATATA 3.43761831979  
GATATATC 5.28423223174  
GATATCAA 6.57570326551  
GATATCAC 9.54007687914  
GATATCCA 22.1608897526  
GATATCCC 19.8923016569  
GATATCGA 9.6793033534  
GATATCGC 17.5924831656  
GATATCTA 18.7691329245  
GATATGAA 2.11259791292  
GATATGAC 2.81764026  
GATATGCA 6.68986036972  
GATATGCC 3.6397251027  
GATATGGA 3.5873071151  
GATATGGC 2.08583243771  
GATATGTA 3.5460454167  
GATATTAA 3.78514318416  
GATATTAC 6.55707982694  
GATATTCA 7.46060829909  
GATATTCC 12.2824737425  
GATATTGA 3.30686740509  
GATATTGC 5.6625389609  
GATATTTA 7.77072318423  
GATCAAAA 1.81913486499  
GATCAAAC 0.99132158328  
GATCAACA -0.612223913423  
GATCAACC -0.298994927983  
GATCAAGA 0.480771450527  
GATCAAGC -0.478878786406  
GATCAATA -0.118017710353  
GATCAATC 0.755375032316  
GATCACAA 1.61544829172  
GATCACAC 2.08035884575  
GATCACCA 1.59010865311  
GATCACCC 0.690931923112  
GATCACGA 2.64909095301  
GATCACGC 2.65903913647  
GATCACTA 0.302881933666  
GATCAGAA 3.43621234819  
GATCAGAC 1.00561340607

GATCAGCA 1.51077019101  
GATCAGCC 0.537570977782  
GATCAGGA 1.17748069101  
GATCAGGC 0.28536178681  
GATCAGTA 1.05118162762  
GATCATAA 2.4259939212  
GATCATAC 0.717833316753  
GATCATCA 1.33080399739  
GATCATCC 0.623944002711  
GATCATGA 1.28122252285  
GATCATGC 1.31358051864  
GATCATT A 2.99750059408  
GATCCAAA 1.62569993922  
GATCCAAC 0.96588131275  
GATCCACA 2.27822392816  
GATCCACC 2.20625250629  
GATCCAGA 2.70241515059  
GATCCAGC 1.38345252355  
GATCCATA 1.74237075022  
GATCCATC 0.928696644443  
GATCCCAA 1.44881778702  
GATCCCAC 1.32862773424  
GATCCCCA 6.67591017267  
GATCCCCC 4.48807775006  
GATCCCGA 4.59599828944  
GATCCCGC 4.58587524169  
GATCCCTA 2.71762154758  
GATCCGAA 3.10869023306  
GATCCGAC 1.61027398169  
GATCCGCA 3.34425673518  
GATCCGCC 3.69996571864  
GATCCGGA 2.8382583015  
GATCCGGC 1.36022510959  
GATCCGTA 3.8552859804  
GATCCTAA 2.40411680456  
GATCCTAC 2.43836092993  
GATCCTCA 5.14003401818  
GATCCTCC 3.89094627125  
GATCCTGA 2.54849693971  
GATCCTGC 3.59086216616  
GATCCTTA 2.57377123292  
GATCGAAA 1.5260518659  
GATCGAAC 0.679078790594  
GATCGACA 0.0991352426308  
GATCGACC 0.0407935639726  
GATCGAGA 1.49138587063  
GATCGAGC 0.672015998546  
GATCGATA 3.01964797929  
GATCGATC 1.36242594262  
GATCGCAA 3.71986469938  
GATCGCAC 6.91222187372  
GATCGCCA 4.15781740134  
GATCGCCC 6.95579183298  
GATCGCGA 9.28285909407

GATCGCGC 12.0193529155  
GATCGCTA 3.00139753226  
GATCGGAA 1.84914486993  
GATCGGAC -0.387147438803  
GATCGGCA 0.843286549306  
GATCGGCC 0.135789306301  
GATCGGGA 4.74271517604  
GATCGGGC 1.68447812514  
GATCGGTA 0.961436780127  
GATCGTAA 2.84318612869  
GATCGTAC 2.77479772571  
GATCGTCA 3.58348989831  
GATCGTCC 2.81148681452  
GATCGTGA 1.60399376614  
GATCGTGC 2.35344902812  
GATCGTTA 2.04450068904  
GATCTAAA 2.19736762316  
GATCTAAC 2.59118917958  
GATCTACA 3.68883007859  
GATCTACC 3.36813734174  
GATCTAGA 3.98438313375  
GATCTAGC 2.3157930888  
GATCTATA 3.63341535102  
GATCTCAA 3.49829282917  
GATCTCAC 5.4797762456  
GATCTCCA 10.5096460248  
GATCTCCC 5.46255381238  
GATCTCGA 4.79290044206  
GATCTCGC 9.20338340664  
GATCTCTA 6.21909434522  
GATCTGAA 3.24895805159  
GATCTGAC 2.14337768665  
GATCTGCA 4.73043442323  
GATCTGCC 2.88739046108  
GATCTGGA 2.72007487522  
GATCTGGC 1.64558585088  
GATCTGTA 3.5214865249  
GATCTTAA 3.11072430462  
GATCTTAC 6.67631113204  
GATCTTCA 9.07492742233  
GATCTTCC 4.37135048063  
GATCTTGA 4.3600556592  
GATCTTGC 3.77655575327  
GATCTTTA 4.24273087145  
GATGAAAA 1.69941137836  
GATGAAAC -0.22060763351  
GATGAACA 0.195216502719  
GATGAACC -1.12297217342  
GATGAAGA -0.695546876533  
GATGAAGC -0.174667727336  
GATGAATA 1.10791842329  
GATGAATC 0.783436176088  
GATGACAA 1.10516319991  
GATGACAC 0.498167179744



GATGACCA -0.381775001523  
GATGACCC -0.798477379907  
GATGACGA -0.62113467334  
GATGACGC -0.697851739428  
GATGACTA 0.732352018765  
GATGAGAA 0.591756950479  
GATGAGAC -0.40371667942  
GATGAGCA -0.594390108656  
GATGAGCC -0.685980310198  
GATGAGGA 0.310193560991  
GATGAGGC -1.13081832611  
GATGAGTA 1.42507231474  
GATGATAA 1.03484580076  
GATGATAC 0.679888550771  
GATGATCA 0.703387017441  
GATGATCC 1.29774497616  
GATGATGA -0.0478472076646  
GATGATGC 0.726712188115  
GATGATTA 2.69323673593  
GATGCAAA 1.97626310324  
GATGCAAC 0.337918568033  
GATGCACA -0.512609035568  
GATGCACC 0.801127266506  
GATGCAGA 1.5260518659  
GATGCAGC -1.15820405984  
GATGCATA 1.40437742705  
GATGCATC 0.145631107455  
GATGCCAA -0.282735947319  
GATGCCAC -0.851066833829  
GATGCCCA 0.0845234887707  
GATGCCCC -0.105849090251  
GATGCCGA -0.349193524466  
GATGCCGC 0.10819891078  
GATGCCTA 0.496235569765  
GATGCGAA 1.10594734469  
GATGCGAC 0.228930546222  
GATGCGCA 2.32737307755  
GATGCGCC 0.00140283501426  
GATGCGGA 0.28326916577  
GATGCGGC 0.100171882032  
GATGCGTA 1.16101025263  
GATGCTAA 0.347827021493  
GATGCTAC 0.147049102602  
GATGCTCA -0.162329993342  
GATGCTCC 0.31288788246  
GATGCTGA 0.901166105307  
GATGCTGC 1.43713716635  
GATGCTTA 0.402591170276  
GATGAAA 0.367606550846  
GATGGAAC 0.721480635513  
GATGGACA 0.152924438069  
GATGGACC -0.959306520137  
GATGGAGA 0.093112487945  
GATGGAGC -0.766639272103

GATGGATA 2.74059254619  
GATGGCAA -0.00343821348567  
GATGGCAC -0.415214855734  
GATGGCCA -0.836888712033  
GATGGCCC -1.39192285548  
GATGGCGA 1.90771551886  
GATGGCGC -0.255912445393  
GATGGCTA -0.465142660885  
GATGGGAA 0.0936174771844  
GATGGGAC -0.604048158549  
GATGGGCA -0.350996011937  
GATGGGCC -1.49659625132  
GATGGGGA 0.152460224358  
GATGGGGC -0.213120096372  
GATGGGTA -0.178685685197  
GATGGTAA 1.5044183569  
GATGGTAC -0.42295462611  
GATGGTCA 0.290742588302  
GATGGTCC -1.06352458924  
GATGGTGA 0.777370032058  
GATGGTGC -0.0555854097509  
GATGGTTA 0.675201194649  
GATGTAAA 1.60947127882  
GATGTAAAC 0.460894687222  
GATGTACA 0.141492129916  
GATGTACC 0.552175412957  
GATGTAGA 0.513802765307  
GATGTAGC -0.103711772958  
GATGTATA 1.24468974024  
GATGTCAA 1.37347558811  
GATGTCAC 0.257220398889  
GATGTCCA 0.423421715018  
GATGTCCC 0.390479531362  
GATGTCGA 1.2166905439  
GATGTTCG 0.929344348033  
GATGTCTA 0.89169442049  
GATGTGAA 1.23780599458  
GATGTGAC -0.489954570064  
GATGTGCA 1.0430092707  
GATGTGCC -0.553428476318  
GATGTGGA -0.114522254298  
GATGTGGC -0.243203810918  
GATGTGTA 0.926202018512  
GATGTTAA 1.84661025261  
GATGTTAC 1.4146708956  
GATGTTCA 1.48879453351  
GATGTTCC -0.175101620782  
GATGTTGA 0.967767442331  
GATGTTGC 0.290734485472  
GATGTTTA 0.701534083322  
GATTAATA 1.53566182158  
GATTAAC -0.503155386081  
GATTAACA 1.44679835282  
GATTAACC 0.366975052915

GATTAAGA 1.09881110441  
GATTAAGC -0.100567091002  
GATTAATA 0.953561614086  
GATTAATC 1.746801691  
GATTACAA 9.67231035024  
GATTACAC 12.7488663301  
GATTACCA 12.3713931469  
GATTACCC 7.4595361118  
GATTACGA 16.2801342771  
GATTACGC 14.6415006538  
GATTACTA 8.66154746539  
GATTAGAA 0.138842243318  
GATTAGAC 0.64264402608  
GATTAGCA 1.6238697453  
GATTAGCC -0.0437056163098  
GATTAGGA 0.375500274981  
GATTAGGC 0.676813657701  
GATTAGTA 0.321681543423  
GATTATAA 2.55016220184  
GATTATAC 2.90422395849  
GATTATCA 5.06495581469  
GATTATCC 5.09617497088  
GATTATGA 3.50825094513  
GATTATGC 4.41424110914  
GATTATTA 2.39778091472  
GATTCAAA 2.18417098924  
GATTC AAC 0.739424481932  
GATTCACA 4.27125283098  
GATTCACC 1.65095253776  
GATTCAGA 1.4684052009  
GATTCAGC 0.802317859666  
GATTCATA 1.24569240003  
GATTCCAA 5.98334827394  
GATTCAC 6.22414293071  
GATTCCCA 16.4508901675  
GATTCCCC 28.160557125  
GATTC CGA 8.68028199113  
GATTC CGC 8.71169117174  
GATTCCTA 8.91435757264  
GATTCGAA 3.81765199713  
GATTCGAC 3.77883630768  
GATTCGCA 13.7221808127  
GATTCGCC 13.1842449462  
GATTCGGA 6.07299902406  
GATTCGGC 4.01412339288  
GATTCGTA 6.03395671676  
GATTCTAA 5.35119218431  
GATTCTAC 4.67342709761  
GATTCTCA 21.7249104817  
GATTCTCC 18.8195238979  
GATTCTGA 6.74533207847  
GATTCTGC 6.35920193683  
GATTCTTA 8.69081776041  
GATTGAAA 1.34923767292

GATTGAAC -0.295529008049  
GATTGACA 2.52621154501  
GATTGACC 0.402496811521  
GATTGAGA 1.96253769436  
GATTGAGC 0.0198367719215  
GATTGATA 0.749849425422  
GATTGCAA 7.42047184845  
GATTGCAC 15.0499791831  
GATTGCCA 6.35606195975  
GATTGCCC 7.34088115312  
GATTGCGA 15.4368798777  
GATTGCGC 23.3257352574  
GATTGCTA 8.71232920421  
GATTGGAA 1.29518108411  
GATTGGAC 0.458199320226  
GATTGGCA 0.372161386501  
GATTGGCC 0.121272172578  
GATTGGGA 0.957418299503  
GATTGGGC -0.245530891248  
GATTGGTA 1.0600602376  
GATTGTAA 1.45949888447  
GATTGTAC 3.63624297711  
GATTGTCA 5.15525113182  
GATTGTCC 5.60437449896  
GATTGTGA 4.06890583838  
GATTGTGC 3.71767536715  
GATTGTTA 3.09396713064  
GATTTAAA 3.02071023409  
GATTTAAC 2.81604374122  
GATTTACA 3.98090911099  
GATTTACC 2.8242492936  
GATTTAGA 1.9615203972  
GATTTAGC 2.03150531895  
GATTTATA 3.8707121993  
GATTTCAA 5.7333880102  
GATTTCAC 9.26265638791  
GATTTCCA 19.383233035  
GATTTCCC 25.4970300666  
GATTTCGA 17.2064353592  
GATTTCGC 14.822049467  
GATTTCTA 10.0582413191  
GATTTGAA 3.22458055862  
GATTTGAC 5.71901881846  
GATTTGCA 7.9897379583  
GATTTGCC 7.93398265052  
GATTTGGA 4.67470446946  
GATTTGGC 2.81721107142  
GATTTGTA 5.71007799966  
GATTTTAA 5.67942891673  
GATTTTAC 5.30246647311  
GATTTTCA 13.3607203886  
GATTTTCC 11.6608176129  
GATTTTGA 5.67922608461  
GATTTTGC 18.3343552248

GATTTTTA 8.51648982915  
GCAAAAAA 1.76108985444  
GCAAAAAC 0.198211935785  
GCAAAAACA 0.0527107349816  
GCAAAAACC -0.213028090051  
GCAAAAAGA 0.651897718648  
GCAAAAAGC -0.403730271263  
GCAAAAATA 2.01834240327  
GCAAACAA 1.21110586477  
GCAAACAC -0.0288648921735  
GCAAACCA -0.909713544807  
GCAAACCC -0.320332291635  
GCAAACGA 1.18111232687  
GCAAACGC -0.258686226867  
GCAAACCTA 0.267634887115  
GCAAAGAA 1.88842947796  
GCAAAGAC 0.176546538233  
GCAAAGCA -0.810303851503  
GCAAAGCC -1.02479986059  
GCAAAGGA 0.335574236518  
GCAAAGGC -1.17106900051  
GCAAAGTA 0.634610201411  
GCAAATAA 1.43562847179  
GCAAATAC 3.31183862162  
GCAAATCA 5.65896404484  
GCAAATCC 9.51839344626  
GCAAATGA 0.531915464235  
GCAAATGC 0.284263984116  
GCAAATTA 1.25971709083  
GCAACAAA 0.863757432974  
GCAACAAC -0.352002069692  
GCAACACA -0.429592150304  
GCAACACC 0.0244057221822  
GCAACAGA 0.314054689895  
GCAACAGC -0.838168697698  
GCAACATA 0.879186265697  
GCAACCAA 0.783752709198  
GCAACCAC 0.594824524865  
GCAACCCA 0.173801508734  
GCAACCCC -1.10285154109  
GCAACCGA -0.577245044388  
GCAACCGC -0.373161432479  
GCAACCTA -0.132094938854  
GCAACGAA 0.203562417011  
GCAACGAC 0.212901058597  
GCAACGCA -0.481057663373  
GCAACGCC -0.756896273192  
GCAACGGA 1.13527383676  
GCAACGGC -0.686245873897  
GCAACGTA 0.943601668452  
GCAACTAA -0.395131078206  
GCAACTAC -0.145646528969  
GCAACTCA -0.856414178476  
GCAACTCC -0.0102338735445

GCAACTGA -0.205838005167  
GCAACTGC -0.687690268585  
GCAACTTA -0.16437138359  
GCAAGAAA 1.54305134062  
GCAAGAAC -0.19236326124  
GCAAGACA 0.120891862359  
GCAAGACC -1.24635264994  
GCAAGAGA 0.552132546376  
GCAAGAGC -0.396477193414  
GCAAGATA 1.84818167876  
GCAAGCAA -0.258945517408  
GCAAGCAC -0.617593998269  
GCAAGCCA 0.348620314631  
GCAAGCCC -1.31429984079  
GCAAGCGA -0.745398619641  
GCAAGCGC -0.479005556479  
GCAAGCTA -1.6419317362  
GCAAGGAA -0.675601369869  
GCAAGGAC -0.579138231272  
GCAAGGCA -1.0541598095  
GCAAGGCC -0.337996198367  
GCAAGGGA -0.127309564633  
GCAAGGGC -0.945861835094  
GCAAGGTA 0.251385054806  
GCAAGTAA 0.272520631867  
GCAAGTAC 0.144036941114  
GCAAGTCA -0.00199434156118  
GCAAGTCC -0.368531318925  
GCAAGTGA -0.640226246337  
GCAAGTGC -0.404757239545  
GCAAGTTA 0.1763510248  
GCAATAAA 0.758221739255  
GCAATAAC 1.42905472471  
GCAATACA -0.0177587882502  
GCAATACC 0.866400785033  
GCAATAGA 1.39731986263  
GCAATAGC -0.0441044846221  
GCAATATA 3.28050524168  
GCAATCAA 6.32309938833  
GCAATCAC 5.05162718307  
GCAATCCA 18.3176432698  
GCAATCCC 12.137147406  
GCAATCGA 3.92083159716  
GCAATCGC 5.32145924387  
GCAATCTA 14.7840309914  
GCAATGAA 1.34340886337  
GCAATGAC -1.16492182819  
GCAATGCA -0.00777976175974  
GCAATGCC -1.46745952229  
GCAATGGA 0.938331692756  
GCAATGGC -1.46856778025  
GCAATGTA 0.582768560229  
GCAATTAA 1.29222904039  
GCAATTAC 2.13854787756

GCAATTCA 1.39943862183  
GCAATTCC 1.4791835323  
GCAATTGA 0.296692156141  
GCAATTGC 1.73653462199  
GCAATTTA 4.40066181257  
GCACAAAA 2.50528664152  
GCACAAAC -0.241400539302  
GCACAACA 0.267708335343  
GCACAACC -0.663061849285  
GCACAAGA -0.174549060092  
GCACAAGC -0.430490780224  
GCACAATA 2.36873148715  
GCACACAA 0.545292712828  
GCACACAC -0.572160126861  
GCACACCA -0.091834331951  
GCACACCC -1.58134661932  
GCACACGA -0.0689712839358  
GCACACGC 0.23264791525  
GCACACTA 0.223481524135  
GCACAGAA -0.597613727853  
GCACAGAC 0.442863539351  
GCACAGCA 0.494634868884  
GCACAGCC -1.38989244326  
GCACAGGA 0.00322178952596  
GCACAGGC -1.50322070644  
GCACAGTA -0.561892796472  
GCACATAA 0.481094256796  
GCACATAC 0.257402320478  
GCACATCA 0.812298454446  
GCACATCC 1.11749413798  
GCACATGA 1.21927639201  
GCACATGC -0.445934773079  
GCACATTA 0.893692682775  
GCACCAA 0.998395091973  
GCACCAAC -0.150073287643  
GCACCACA -0.42140986089  
GCACCACC -0.974156131248  
GCACCAGA -0.239815521317  
GCACCAGC -1.55828544405  
GCACCATA 0.556453184122  
GCACCCAA -0.223465841239  
GCACCCAC -0.309982887426  
GCACCCCA -0.861023120121  
GCACCCCC -0.783345738057  
GCACCCGA -0.553751543968  
GCACCCGC -0.721599564139  
GCACCCTA -0.678603598856  
GCACCGAA -1.02760814443  
GCACCGAC -0.923011072014  
GCACCGCA -0.0929543520807  
GCACCGCC -0.153828818383  
GCACCGGA -0.884982141159  
GCACCGGC -1.50261639219  
GCACCGTA -0.0947225985632

GCACCTAA 0.268048654178  
GCACCTAC -0.539067648788  
GCACCTCA -0.471147641623  
GCACCTCC -1.30535274883  
GCACCTGA -0.458038831927  
GCACCTGC -0.853329875669  
GCACCTTA 0.275391647294  
GCACGAAA 1.47676679809  
GCACGAAC -1.02152161264  
GCACGACA -0.0482907722294  
GCACGACC -0.601858303556  
GCACGAGA -0.264557380229  
GCACGAGC -0.954420775385  
GCACGATA 1.42350977557  
GCACGCAA -0.2627585521  
GCACGCAC 0.0678787088735  
GCACGCCA -0.279003940921  
GCACGCCC -1.28449815698  
GCACGCGA 0.0532745350796  
GCACGCGC 0.446491515874  
GCACGCTA -0.161824219958  
GCACGGAA 0.814523073191  
GCACGGAC -1.08580815426  
GCACGGCA -1.09186724099  
GCACGGCC -1.04223505842  
GCACGGGA -0.88062830795  
GCACGGGC -0.814720154913  
GCACGGTA 1.01636037168  
GCACGTAA 1.98557325423  
GCACGTAC -0.687737578654  
GCACGTCA -0.291697153883  
GCACGTCC -0.248791888013  
GCACGTGA 0.444688505639  
GCACGTGC 0.657055300258  
GCACGTTA 0.7063058657  
GCACTAAA -0.0623039622396  
GCACTAAC -0.646791629212  
GCACTACA 0.324484861017  
GCACTACC -0.603272900742  
GCACTAGA 0.356913429841  
GCACTAGC -0.689033769978  
GCACTATA -0.00833336797554  
GCACTCAA -1.10811053876  
GCACTCAC -0.946313241107  
GCACTCCA 0.112018218629  
GCACTCCC -0.997287095397  
GCACTCGA 0.410208614066  
GCACTCGC -1.18423060929  
GCACTCTA 0.0909001541346  
GCACTGAA -1.1771158023  
GCACTGAC -0.522446393234  
GCACTGCA 0.742082209978  
GCACTGCC -0.656231425474  
GCACTGGA -0.451255979567



GCACTGGC -0.726095066171  
GCACTGTA -0.396699367769  
GCACTTAA -0.147181100307  
GCACTTAC -0.359754125003  
GCACTTCA -1.02920570873  
GCACTTCC -0.610638634057  
GCACTTGA 0.158447169765  
GCACTTTA -0.545657601533  
GCAGAAAA 0.421682743274  
GCAGAAAC 0.0839758943316  
GCAGAAC A 0.0969568884276  
GCAGAAC C -0.846799517928  
GCAGAAGA 0.316351972724  
GCAGAAGC -1.67280926664  
GCAGAATA 1.11081217891  
GCAGACAA 0.176198377949  
GCAGACAC -0.247718132425  
GCAGACCA -1.27366023058  
GCAGACCC -0.795071577739  
GCAGACGA 1.179397925  
GCAGACGC -0.344246093658  
GCAGACTA -0.551017753878  
GCAGAGAA 0.40755088602  
GCAGAGAC -0.567042013871  
GCAGAGCA -0.870759584492  
GCAGAGCC -1.48970414146  
GCAGAGGA -0.0921328297312  
GCAGAGGC -1.04255080739  
GCAGAGTA -0.166588683651  
GCAGATAA 2.89354861144  
GCAGATAC 4.38657674262  
GCAGATCA 2.76070403017  
GCAGATCC 5.6720804346  
GCAGATGA -0.16928457341  
GCAGATGC 0.0161021517083  
GCAGATTA 3.41101045768  
GCAGCAAA 1.3677769466  
GCAGCAAC -0.260901697257  
GCAGCACA -0.628261503878  
GCAGCACC 0.429407614899  
GCAGCAGA -0.417184366043  
GCAGCAGC -0.853691627795  
GCAGCATA 0.0964333410951  
GCAGCCAA -0.278279913906  
GCAGCCAC -1.18098895476  
GCAGCCCA -0.735373067227  
GCAGCCCC -1.14357845276  
GCAGCCGA -0.949400680493  
GCAGCCGC -1.21171854323  
GCAGCCTA -0.878544835266  
GCAGCGAA -1.20885981273  
GCAGCGAC -1.00218878443  
GCAGCGCA -0.179102327457  
GCAGCGCC -1.13350428337

GCAGCGGA -0.193330634519  
GCAGCGGC -1.05487808612  
GCAGCGTA 0.0765241664721  
GCAGCTAA -1.26826531448  
GCAGCTAC -0.981578584369  
GCAGCTCA -1.30381294986  
GCAGCTCC -1.14883013174  
GCAGCTGA -1.01874417182  
GCAGCTGC -1.06247069866  
GCAGCTTA -0.407346485614  
GCAGGAAA 0.140006436937  
GCAGGAAC -1.35720092455  
GCAGGACA -0.154197889194  
GCAGGACC -1.17212864149  
GCAGGAGA 0.663496788257  
GCAGGAGC -0.895827909015  
GCAGGATA 1.23583387046  
GCAGGCAA 0.398707562555  
GCAGGCAC -0.527092712447  
GCAGGCCA -1.85251434006  
GCAGGCCC -1.12153300637  
GCAGGCCG 0.181433328511  
GCAGGCCG -0.061436175348  
GCAGGCTA -1.0884305958  
GCAGGGAA -0.214086685506  
GCAGGGAC -1.11913352334  
GCAGGGCA -1.11089033201  
GCAGGGCC -1.16911595724  
GCAGGGGA -0.102649256779  
GCAGGGGC -1.09854815453  
GCAGGGTA -0.162153038003  
GCAGGTAA 0.353354980822  
GCAGGTAC -0.739130689021  
GCAGGTCA -0.985016536473  
GCAGGTCC -0.893588391519  
GCAGGTGA -0.306684774475  
GCAGGTTA -0.393658977069  
GCAGTAAA 1.44567022987  
GCAGTAAC -0.414961054206  
GCAGTACA -0.191567615669  
GCAGTACC -1.28739112846  
GCAGTAGA 0.0549408427405  
GCAGTAGC -0.868945334849  
GCAGTATA 1.70224710727  
GCAGTCAA -0.215376603672  
GCAGTCAC -0.331522821813  
GCAGTCCA -1.07063207754  
GCAGTCCC -0.805769142231  
GCAGTCGA 0.188646153594  
GCAGTCGC -0.994146072783  
GCAGTCTA -0.904252237785  
GCAGTGAA -0.114522254298  
GCAGTGAC -0.715192317128  
GCAGTGCA -0.407141039681

GCAGTGCC -0.882100670469  
GCAGTGGA -0.307974431259  
GCAGTGGC -0.731751886626  
GCAGTGTA 0.663739088995  
GCAGTTAA 0.330564074127  
GCAGTTAC 1.1698833736  
GCAGTTCA -1.02920570873  
GCAGTTCC -0.474019702576  
GCAGTTGA 0.542684647284  
GCAGTTTA 0.0711872770886  
GCATAAAA 0.920315705018  
GCATAAAC 0.369560639642  
GCATAACA 0.729327310961  
GCATAACC -0.729167868189  
GCATAAGA 1.87083091663  
GCATAAGC -0.779547863498  
GCATAATA 1.19552543072  
GCATACAA 0.183321026382  
GCATACAC 0.762292757579  
GCATACCA 0.534121786269  
GCATACCC 0.944850026944  
GCATACGA 2.16464055655  
GCATACGC -0.757614027049  
GCATACTA 0.264126623362  
GCATAGAA 0.922262997892  
GCATAGAC -0.422584248391  
GCATAGCA -0.455960064111  
GCATAGCC -1.51088493753  
GCATAGGA 0.225786125648  
GCATAGGC -0.0773616330988  
GCATAGTA 2.32892437731  
GCATATAA 1.08235242821  
GCATATAC 0.372064413929  
GCATATCA 2.68060939113  
GCATATCC 6.68867997044  
GCATATGA 0.412030443776  
GCATATGC 1.03912095811  
GCATATTA 0.840459707369  
GCATCAAA 1.90058921109  
GCATCAAC 0.928089716382  
GCATCACA 0.273072931175  
GCATCACC 0.230978993773  
GCATCAGA 0.924865574422  
GCATCAGC -0.000309475807133  
GCATCATA 0.599453592892  
GCATCCAA 0.199643261393  
GCATCCAC 1.29446934203  
GCATCCCA 0.33599924299  
GCATCCCC 0.0419012991674  
GCATCCGA 0.828963360726  
GCATCCGC -0.291039256411  
GCATCCTA -0.529076337363  
GCATCGAA 1.57643081568  
GCATCGAC -0.253561056575

GCATCGCA -0.287015548155  
GCATCGCC -1.13348912324  
GCATCGGA 1.73561508154  
GCATCGGC 0.345364284116  
GCATCGTA 0.631478327154  
GCATCTAA 1.47900161071  
GCATCTAC 0.71923170828  
GCATCTCA 0.367355624516  
GCATCTCC -0.17236600102  
GCATCTGA 1.14629786686  
GCATCTTA 0.34871859411  
GCATGAAA 1.09651094639  
GCATGAAC 0.578297366685  
GCATGACA -0.434437642291  
GCATGACC -1.44866984504  
GCATGAGA 1.45011110315  
GCATGAGC -0.895931938889  
GCATGATA 1.17029923172  
GCATGCAA 2.21741114792  
GCATGCAC -0.248761567748  
GCATGCCA -0.355782170303  
GCATGCCC -0.619267624615  
GCATGCGA 0.599810901531  
GCATGCGC -0.531229860315  
GCATGCTA -0.61588691508  
GCATGGAA -0.697482668618  
GCATGGAC -0.0889533840235  
GCATGGCA -0.654717764664  
GCATGGCC -1.20419859477  
GCATGGGA -0.558646698458  
GCATGGGC -1.20452584453  
GCATGGTA 0.717843772016  
GCATGTAA 0.683903633435  
GCATGTAC -0.928060703025  
GCATGTCA -0.276015303777  
GCATGTCC -0.290458727891  
GCATGTGA -0.313231076493  
GCATGTTA -0.662019982252  
GCATTAAG 0.697512988882  
GCATTAAC 0.713938731004  
GCATTACA 0.0973570636478  
GCATTACC -0.523005227082  
GCATTAGA 0.708228850086  
GCATTAGC -0.454993736359  
GCATTATA 0.153305009669  
GCATTCAA 0.773949331139  
GCATTCAC 0.709336846662  
GCATTCOA -0.889168428767  
GCATTCOC -0.607469382231  
GCATTCOA 0.246969535541  
GCATTCOC -0.923591861915  
GCATTCTA 0.028468114914  
GCATTGAA 0.496063057913  
GCATTGAC 0.19115620104

GCATTGCA -0.444284148314  
GCATTGCC -0.815676288783  
GCATTGGA -0.0769632875498  
GCATTGGC -0.0548145954306  
GCATTGTA 0.222310795976  
GCATTTAA 0.561949516278  
GCATTTAC 1.66718799409  
GCATTTCA 0.73505052234  
GCATTTCC -0.206389258949  
GCATTTGA 2.10239828037  
GCATTTTA 0.761328782261  
GCCAAAAA 0.122747410294  
GCCAAAAC 0.0718114563348  
GCCAAACA -0.680231483423  
GCCAAACC -0.252759137845  
GCCAAAGA -0.923557882308  
GCCAAAGC -1.26711262165  
GCCAAATA 0.573042028358  
GCCAACAA -0.0425482186122  
GCCAACAC -0.626535601214  
GCCAACCA -0.587668419588  
GCCAACCC -0.136122306452  
GCCAACGA -0.503941099152  
GCCAACGC -0.626869908272  
GCCAACTA -0.395622998366  
GCCAAGAA 0.101135595969  
GCCAAGAC -0.382710224866  
GCCAAGCA -0.38402784948  
GCCAAGCC -1.05449019583  
GCCAAGGA -0.797768251643  
GCCAAGGC -1.50996774952  
GCCAAGTA -0.293997834672  
GCCAATAA 1.46418702474  
GCCAATAC -0.671978098215  
GCCAATCA 0.31447368459  
GCCAATCC 0.124360134728  
GCCAATGA -0.829862513409  
GCCAATTA -0.170009907333  
GCCACAAA 0.428168143381  
GCCACAAC -0.0959505692912  
GCCACACA -0.398214335487  
GCCACACC 0.215553036248  
GCCACAGA -0.158482194899  
GCCACAGC -1.33624334836  
GCCACATA -0.219706389774  
GCCACCAA -0.535839324722  
GCCACCAC -0.855429292631  
GCCACCCA -0.854502433499  
GCCACCCC -1.37059516295  
GCCACCGA -0.948758727299  
GCCACCGC -1.29571900743  
GCCACCTA -0.986794976838  
GCCACGAA 0.500257971113  
GCCACGAC -0.501379036769

GCCACGCA 0.18118710705  
GCCACGCC -1.55652216382  
GCCACGGA -0.602837961769  
GCCACGGC -0.846917662408  
GCCACGTA -0.0136216403826  
GCCACTAA 0.0233737876496  
GCCACTAC -0.554230395048  
GCCACTCA -0.460882663669  
GCCACTCC -1.27728193394  
GCCACTGA -0.31548706103  
GCCACTTA -0.626644074575  
GCCAGAAA 1.08307175036  
GCCAGAAC 0.0722887391252  
GCCAGACA -0.504096359819  
GCCAGACC -0.440168172355  
GCCAGAGA 0.477566128042  
GCCAGAGC -0.571170013383  
GCCAGATA 0.609805088154  
GCCAGCAA -0.30262185898  
GCCAGCAC -1.31634567453  
GCCAGCCA -1.27265417282  
GCCAGCCC -1.49142795307  
GCCAGCGA -1.00642499592  
GCCAGCGC -0.50780771707  
GCCAGCTA -0.522777040951  
GCCAGGAA -0.183779489698  
GCCAGGAC -0.77713583415  
GCCAGGCA -2.12602090329  
GCCAGGCC -1.28387842122  
GCCAGGGA -0.829769984324  
GCCAGGGC -1.51014731868  
GCCAGGTA -0.103345838726  
GCCAGTAA -0.749274647297  
GCCAGTAC -0.732054827893  
GCCAGTCA -1.12753328224  
GCCAGTCC -0.170426026831  
GCCAGTGA -0.73740374083  
GCCAGTTA 0.434515272625  
GCCATAAA 0.00950801685836  
GCCATAAC -0.489729259131  
GCCATACA 0.169739638765  
GCCATACC -1.33332371595  
GCCATAGA 0.150125041198  
GCCATAGC -0.620427374747  
GCCATATA 0.144975823799  
GCCATCAA 0.280606732855  
GCCATCAC -0.587594709978  
GCCATCCA -0.311067098277  
GCCATCCC -1.0178426667  
GCCATCGA -0.158780954061  
GCCATCGC -0.826971632981  
GCCATCTA 0.190896649117  
GCCATGAA -0.217523853466  
GCCATGAC -1.19802842087

GCCATGCA -1.10721609095  
GCCATGCC -0.606367658813  
GCCATGGA -0.0907584853107  
GCCATGGC -0.118433045706  
GCCATGTA 0.121127889938  
GCCATTAA -0.10820387703  
GCCATTAC -0.252821346664  
GCCATTCA -0.246479967815  
GCCATTCC -0.725872891817  
GCCATTGA -0.754729419779  
GCCATTTA 0.0194656100582  
GCCCAAAA 0.972230794428  
GCCCAAAC -0.692041226597  
GCCCAACA -0.689616650932  
GCCCAACC -0.65601264908  
GCCCAAGA -0.347325952978  
GCCCAAGC -1.28054502176  
GCCCAATA 0.224751838681  
GCCCACAA -0.390780120195  
GCCCACAC -1.10019538134  
GCCCACCA -1.64587180234  
GCCCACCC -0.433111392084  
GCCCACGA -0.471720851458  
GCCCACGC -0.813626534324  
GCCCACTA 0.314418533074  
GCCCAGAA -0.0555854097509  
GCCCAGAC -1.1300587512  
GCCCAGCA -0.418030196881  
GCCCAGCC -1.46694355503  
GCCCAGGA -1.181900131  
GCCCAGGC -1.59365507857  
GCCCAGTA -0.414468872665  
GCCCATAA 0.174837102609  
GCCCATAC -0.513069851318  
GCCCATCA -1.26020482889  
GCCCATCC -0.546120246954  
GCCCATGA -1.07045329253  
GCCCATTA -1.32827434632  
GCCCAAAA -0.783029204947  
GCCCAAAC -1.2761663573  
GCCCCACA -0.153965259575  
GCCCCACC -0.527622271556  
GCCCCAGA -0.213349850793  
GCCCCAGC -0.989822821221  
GCCCCATA -0.0585013828121  
GCCCCCAA -1.01075739584  
GCCCCCAC -0.751145616746  
GCCCCCCA -1.50128177778  
GCCCCCCC -1.2621445417  
GCCCCCGA -1.45430732325  
GCCCCCGC -0.705291705116  
GCCCCCTA -1.11181771391  
GCCCCGAA -0.155195582738  
GCCCCGAC -0.42935533858

GCCCCGCA -0.90458915866  
GCCCCGCC -1.01489794167  
GCCCCGGA -0.714279049839  
GCCCCGGC -1.36372448637  
GCCCCGTA -0.88601041635  
GCCCCCTAA -0.937317532172  
GCCCCCTAC -0.307565369064  
GCCCCCTCA -0.822131630007  
GCCCCCTCC -2.07481781735  
GCCCCCTGA -0.965703050502  
GCCCCCTTA -1.38729692403  
GCCCCGAAA -0.385002541444  
GCCCCGAAC 0.212426912385  
GCCCCGACA -0.23005683951  
GCCCCGACC -1.22551949138  
GCCCCGAGA 0.709336846662  
GCCCCGAGC -0.996836996292  
GCCCCGATA -0.180778044856  
GCCCCGCAA -1.05405525686  
GCCCCGCAC -1.12805709095  
GCCCCGCCA -1.00789396048  
GCCCCGCCC -0.654120769104  
GCCCCGCGA -0.551738382932  
GCCCCGCGC -1.69236453059  
GCCCCGCTA -1.68372534615  
GCCCCGGAA -0.598250192034  
GCCCCGGAC -1.49085892534  
GCCCCGGCA -0.540604049797  
GCCCCGGCC -1.57439543721  
GCCCCGGGA -0.40652914537  
GCCCCGGGC -0.592226914585  
GCCCCGGTA -0.785708366284  
GCCCCGTAA 0.166900511893  
GCCCCGTAC -0.615915405673  
GCCCCGTCA -0.965207993764  
GCCCCGTCC -0.960231288217  
GCCCCGTGA -0.104712080317  
GCCCCGTTA -0.663427260753  
GCCCTAAA -0.37441135926  
GCCCTAAC -0.766345740574  
GCCCTACA -0.214253969726  
GCCCTACC -0.0486912088312  
GCCCTAGA 0.714168746807  
GCCCTAGC -0.468847483597  
GCCCTATA 0.178745018818  
GCCCTCAA -0.897129589353  
GCCCTCAC -0.30171172827  
GCCCTCCA -1.13593042732  
GCCCTCCC -0.320863157652  
GCCCTCGA -0.994982493884  
GCCCTCGC -1.21299094882  
GCCCTCTA -0.71956470843  
GCCCTGAA 0.150394787003  
GCCCTGAC -1.15652102376



GCCCTGCA -0.079773662447  
GCCCTGCC -1.5966369198  
GCCCTGGA 0.10503227277  
GCCCTGTA -0.589451826203  
GCCCTTAA 0.550986649468  
GCCCTTAC -1.32988445694  
GCCCTTCA -1.30146234519  
GCCCTTCC -0.65315417997  
GCCCTTGA -0.603272900742  
GCCCTTTA -1.30440184259  
GCCGAAAA 0.601873202306  
GCCGAAAC -0.514116684601  
GCCGAACA -0.698801861522  
GCCGAACC -0.411678101387  
GCCGAAGA 0.437322772324  
GCCGAAGC -0.998975881875  
GCCGAATA 0.0218865263805  
GCCGACAA -0.85990937315  
GCCGACAC -0.510430942746  
GCCGACCA -1.25824760351  
GCCGACCC -0.593089735226  
GCCGACGA -0.631178783847  
GCCGACGC -1.16691355593  
GCCGACTA -1.04120521494  
GCCGAGAA 1.08829258631  
GCCGAGAC -0.754388839562  
GCCGAGCA -0.57221580114  
GCCGAGCC -1.22090872007  
GCCGAGGA -0.663496265494  
GCCGAGGC -0.834553267492  
GCCGAGTA -0.626889773273  
GCCGATAA 0.362321415018  
GCCGATAC 0.572187571928  
GCCGATCA 0.778200964145  
GCCGATCC 0.374464681106  
GCCGATGA 0.423446023506  
GCCGATTA 1.45916536156  
GCCGAAA 0.0954249309059  
GCCGCAAC -1.43043638781  
GCCGCACA 0.203846800185  
GCCGCACC -1.44189300445  
GCCGCAGA -0.899452226196  
GCCGCAGC -1.60674402327  
GCCGCATA 0.475213955079  
GCCGCCAA -0.682381347032  
GCCGCCAC -1.08109413722  
GCCGCCCA -0.808774769179  
GCCGCCCC -0.857826161847  
GCCGCCGA -0.595858027687  
GCCGCCGC -1.10250285805  
GCCGCCTA -0.200295669851  
GCCGCGAA 0.181806581427  
GCCGCGAC -0.827300973789  
GCCGCGCA -0.0670503906025

GCCGCGCC -1.27672780496  
GCCGCGGA -0.315870769209  
GCCGCGGC -0.283967316007  
GCCGCGTA -0.414900936439  
GCCGCTAA 0.532125353655  
GCCGCTAC -0.572515344447  
GCCGCTCA -0.552953023199  
GCCGCTCC -1.14738260048  
GCCGCTGA -0.875990352949  
GCCGCTTA 0.0117577282367  
GCCGGAAA 0.439342990663  
GCCGGAAC -0.402768648379  
GCCGGACA -0.347335362715  
GCCGGACC -1.53857204425  
GCCGGAGA -0.220020047687  
GCCGGAGC -1.49372445175  
GCCGGATA 1.55559216811  
GCCGGCAA 0.362550385294  
GCCGGCAC -0.894278177545  
GCCGGCCA -1.20679934163  
GCCGGCCC -0.802766129099  
GCCGGCGA -0.687624923187  
GCCGGCGC -0.813299284569  
GCCGGCTA -0.167202146252  
GCCGGGAA -0.122183348814  
GCCGGGAC -1.41963662312  
GCCGGGCA -1.05652531292  
GCCGGGCC -1.52098315403  
GCCGGGGA -0.45126643483  
GCCGGGTA -1.01244017054  
GCCGGTAA -1.04219166908  
GCCGGTAC -0.814192164093  
GCCGGTCA -0.961534798225  
GCCGGTCC -1.18462817069  
GCCGGTGA -0.617943726842  
GCCGGTTA -0.324780222218  
GCCGTA AA -0.950637015432  
GCCGTAA C -0.0633432154568  
GCCGTACA -0.816730702133  
GCCGTACC -1.38005769941  
GCCGTAGA 0.045317033836  
GCCGTAGC -1.14552888221  
GCCGTATA 0.0463957556739  
GCCGTCAA -0.155100439838  
GCCGTCAC -0.519810621242  
GCCGTCCA -1.19873781051  
GCCGTCCC -0.720102108987  
GCCGT CGA -1.40857521545  
GCCGT CGC -1.09901681173  
GCCGTCTA -1.0266514878  
GCCGTGAA -0.132050503983  
GCCGTGAC -0.52778040742  
GCCGTGCA -1.04223505842  
GCCGTGCC -0.825655315274

GCCGTGGA -0.532234872543  
GCCGTGTA -0.462466636127  
GCCGTTAA -0.356057143739  
GCCGTTAC -0.538383874539  
GCCGTTCA -0.315806730719  
GCCGTTC -1.32782581551  
GCCGTTGA -0.306294793137  
GCCGTTTA 0.116416748091  
GCCTAAAA 0.0861022335976  
GCCTAAAC -0.19460826775  
GCCTAACA -1.00934384418  
GCCTAACC -1.06828487083  
GCCTAAGA 0.411706853362  
GCCTAAGC -1.1906378563  
GCCTAATA 1.13253508042  
GCCTACAA -0.268472876505  
GCCTACAC -0.79345963745  
GCCTACCA -0.632384014376  
GCCTACCC -1.02202712464  
GCCTACGA 0.684598647093  
GCCTACGC -0.482810488341  
GCCTACTA -0.607722660995  
GCCTAGAA -1.25733172241  
GCCTAGAC -0.817328220457  
GCCTAGCA -0.390563957616  
GCCTAGCC -1.32125703467  
GCCTAGGA -1.16651834696  
GCCTAGGC -1.75314489952  
GCCTAGTA -0.665309208229  
GCCTATAA 1.86265803695  
GCCTATAC -0.942201708635  
GCCTATCA 0.308968726842  
GCCTATCC -0.770480274625  
GCCTATGA -1.08072166845  
GCCTATTA -1.08892094767  
GCCTCAA -0.0888566728338  
GCCTCAAC -0.882868609591  
GCCTCACA -0.046519911931  
GCCTCACC 0.0186668279073  
GCCTCAGA -1.26224700328  
GCCTCAGC -0.261537900056  
GCCTCATA -0.77029417093  
GCCTCAA -0.903979878164  
GCCTCCAC -1.15999739896  
GCCTCCA -1.01804785125  
GCCTCCC -1.34397135656  
GCCTCCGA -0.892411651583  
GCCTCCGC -1.01957013766  
GCCTCCTA -1.51003806117  
GCCTCGAA -0.495693987103  
GCCTCGAC -0.30108206001  
GCCTCGCA -0.773369064001  
GCCTCGCC -0.869618131072  
GCCTCGGA -0.675601369869

GCCTCGTA 0.518621857753  
GCCTCTAA -0.423220189809  
GCCTCTAC -0.474227239562  
GCCTCTCA -0.67795328145  
GCCTCTCC -1.52038903367  
GCCTCTGA -0.959782234638  
GCCTCTTA -0.629858022653  
GCCTGAAA -0.791935782758  
GCCTGAAC -0.693669372545  
GCCTGACA -0.935682067539  
GCCTGACC -1.48510539369  
GCCTGAGA -0.481974590004  
GCCTGAGC -0.954264991955  
GCCTGATA 0.95552851058  
GCCTGCAA 0.0228776853845  
GCCTGCAC -1.40948534616  
GCCTGCCA -0.547059652402  
GCCTGCCC -1.04207875223  
GCCTGCGA 0.511883701645  
GCCTGCGC -0.988171412311  
GCCTGCTA -0.656062050201  
GCCTGGAA 0.0364580274752  
GCCTGGAC -0.5736818905  
GCCTGGCA -1.8885410879  
GCCTGGCC -1.00934384418  
GCCTGGGA -1.36094390898  
GCCTGGTA -1.17649188444  
GCCTGTAA -0.649001610588  
GCCTGTAC -0.777004359208  
GCCTGTCA -1.07623557615  
GCCTGTCC -0.877989922142  
GCCTGTGA -0.153905141809  
GCCTGTTA -0.640737770116  
GCCTTAAA 0.27145680878  
GCCTTAAC -0.874106575802  
GCCTTACA 0.239824408291  
GCCTTACC -1.34513659571  
GCCTTAGA -0.131873810025  
GCCTTAGC -0.598645139622  
GCCTTATA -0.333588781931  
GCCTTCAA -1.18710789787  
GCCTTCAC 0.0248639241162  
GCCTTCCA -1.08702279453  
GCCTTCCC -1.61576482484  
GCCTTCGA -0.0289767634957  
GCCTTCGC -1.03006408589  
GCCTTCTA -0.318205429606  
GCCTTGAA -1.05546070569  
GCCTTGAC -1.01273840694  
GCCTTGCA -1.15502121617  
GCCTTGCC -1.4312346472  
GCCTTGGA 0.0986780862232  
GCCTTGTA -0.243477216065  
GCCTTTAA -1.16376050977

GCCTTTAC -0.360392418855  
GCCTTTCA -1.33083039693  
GCCTTTCC -1.31921956515  
GCCTTTGA -0.700964532829  
GCCTTTTA -0.095685528355  
GCGAAAAA -0.0926153401535  
GCGAAAAC -0.194629962422  
GCGAAACA -0.70573840626  
GCGAAACC -0.891047762427  
GCGAAAGA -0.114084178747  
GCGAAAGC -0.503651749728  
GCGAAATA 2.46743492738  
GCGAACAA 0.190566262783  
GCGAACAC -0.31551999511  
GCGAACCA -0.0279359419889  
GCGAACCC -0.514215486844  
GCGAACGA -1.01504457674  
GCGAACGC -0.226217928041  
GCGAACTA 0.152736243321  
GCGAAGAA -0.249225258696  
GCGAAGAC -0.957749208601  
GCGAAGCA -0.414050400733  
GCGAAGCC -0.37438182314  
GCGAAGGA -0.723439951941  
GCGAAGTA 0.346418697466  
GCGAATAA 1.10382910825  
GCGAATAC 1.26711889481  
GCGAATCA 4.72949606331  
GCGAATCC 18.7541554978  
GCGAATGA 0.568308669075  
GCGAATTA 1.97744010455  
GCGACAAA -0.634794214053  
GCGACAAC -0.363188940528  
GCGACACA -0.0212673133847  
GCGACACC -1.21980987185  
GCGACAGA 0.24023425463  
GCGACAGC 0.592677013689  
GCGACATA 1.33063514488  
GCGACCAA -0.775450184251  
GCGACCAC -0.362789810834  
GCGACCCA -1.12247920774  
GCGACCCC -0.442582815519  
GCGACCGA -0.311465443826  
GCGACCGC -0.189969005841  
GCGACCTA -0.521985838866  
GCGACGAA 0.0877497217837  
GCGACGAC -0.296611911992  
GCGACGCA -0.368804724072  
GCGACGCC -1.32078550228  
GCGACGGA -0.76562694119  
GCGACGTA 0.460922655053  
GCGACTAA -0.624050123638  
GCGACTAC -0.204913237088  
GCGACTCA -0.778940674055

GCGACTCC -0.5240118076  
GCGACTGA -0.430273572119  
GCGACTTA 0.382303515106  
GCGAGAAA 1.20879838806  
GCGAGAAC 0.235829713392  
GCGAGACA 0.16813658545  
GCGAGACC -1.38551691538  
GCGAGAGA -0.0333867937473  
GCGAGAGC -0.0408824337145  
GCGAGATA 1.31251565003  
GCGAGCAA 0.325049706641  
GCGAGCAC -0.679591098518  
GCGAGCCA -0.370769790895  
GCGAGCCC -0.817816481274  
GCGAGCGA 0.577677892307  
GCGAGCGC -1.16852628037  
GCGAGCTA -0.455661827713  
GCGAGGAA 0.0745329614901  
GCGAGGAC -0.767462362743  
GCGAGGCA -0.889836520121  
GCGAGGCC -0.404461878344  
GCGAGGGA -1.01738472615  
GCGAGGTA -0.401307263887  
GCGAGTAA 0.882930034266  
GCGAGTAC 0.0890056603423  
GCGAGTCA -0.195888253415  
GCGAGTCC -1.02163871159  
GCGAGTGA 0.195940006971  
GCGAGTTA 0.450589456502  
GCGATAAA 0.734231875188  
GCGATAAC -0.278286448446  
GCGATACA 0.264010047171  
GCGATACC 2.06974910548  
GCGATAGA -0.0246634444337  
GCGATAGC -0.850498590244  
GCGATATA 4.87467001436  
GCGATCAA 1.13609196115  
GCGATCAC 3.93672438221  
GCGATCCA 6.22600370627  
GCGATCCC 5.97818494193  
GCGATCGA 5.101228784  
GCGATCGC 8.72884172502  
GCGATCTA 6.06706775293  
GCGATGAA -0.795322504069  
GCGATGAC -0.499774415164  
GCGATGCA -0.599979492659  
GCGATGCC -0.663050348495  
GCGATGGA 0.0702013457166  
GCGATGTA 0.93694819998  
GCGATTAA 0.0781410730117  
GCGATTAC 8.35759177614  
GCGATTCA 2.76262727594  
GCGATTCC 7.508727605  
GCGATTGA 1.03190264402

GCGATTTA 3.62350768171  
GCGCAAAA 0.106087470264  
GCGCAAAC 0.349895856809  
GCGCAACA 0.710547043442  
GCGCAACC -0.298200850701  
GCGCAAGA 0.270899543222  
GCGCAAGC -0.805716604531  
GCGCAATA 1.93342501244  
GCGCACAA 0.322995770076  
GCGCACAC -0.474751571039  
GCGCACCA -0.317300003765  
GCGCACCC -0.877903404834  
GCGCACGA 0.51130395727  
GCGCACGC 0.181516186477  
GCGCACTA 0.356913429841  
GCGCAGAA 0.489893929535  
GCGCAGAC -0.364910661087  
GCGCAGCA -0.584702784024  
GCGCAGCC -1.15999739896  
GCGCAGGA 0.061636916412  
GCGCAGTA 0.880923930533  
GCGCATAA 1.93722602357  
GCGCATAC 1.30133740479  
GCGCATCA 0.767528753667  
GCGCATCC 0.361948162102  
GCGCATGA 0.384627720238  
GCGCATT A -0.111832114934  
GCGCCAAA -0.088591370516  
GCGCCAAC -0.179560790773  
GCGCCACA -0.157422815299  
GCGCCACC -0.559421433502  
GCGCCAGA -0.442052210884  
GCGCCAGC -0.708801275777  
GCGCCATA -0.0782092936077  
GCGCCCAA -0.0109231368075  
GCGCCCAC -0.409131460518  
GCGCCCCA -0.823571581208  
GCGCCCCC -2.03903310886  
GCGCCCGA -0.906977402283  
GCGCCCGC -1.48818917374  
GCGCCCTA -0.214253969726  
GCGCCGAA 0.0504633760376  
GCGCCGAC -0.979616915507  
GCGCCGCA 0.0599321856569  
GCGCCGCC -1.18046514605  
GCGCCGGA 0.717872785373  
GCGCCGTA 0.134349616482  
GCGCCTAA 0.127255720025  
GCGCCTAC 0.130542332186  
GCGCCTCA -0.603880874329  
GCGCCTCC -1.52916831864  
GCGCCTGA -0.952030440709  
GCGCCTTA -0.575248873155  
GCGCGAAA 0.681057972022

GCGCGAAC -0.140471696174  
GCGCGACA 1.83346563364  
GCGCGACC -0.193870126129  
GCGCGAGA 0.187131970021  
GCGCGAGC -0.0913324792908  
GCGCGATA 3.04408794246  
GCGCGCAA 2.7082771556  
GCGCGCAC 0.0952401341191  
GCGCGCCA 0.0544761062666  
GCGCGCCC -1.00005826306  
GCGCGCGA 2.09499281705  
GCGCGCGC 2.11123611482  
GCGCGCTA 2.38861530775  
GCGCGGAA 1.03249232089  
GCGCGGAC -1.09872510987  
GCGCGGCA -0.88103501771  
GCGCGGCC -1.15019794162  
GCGCGGGA 0.032010358274  
GCGCGGTA -0.198536571724  
GCGCGTAA 0.467961661375  
GCGCGTAC 0.26542673541  
GCGCGTCA -0.0905415385878  
GCGCGTCC -0.785365172251  
GCGCGTGA 0.305271222815  
GCGCGTTA 0.417522332444  
GCGCTAAA 0.833199310836  
GCGCTAAC 0.181704642606  
GCGCTACA 0.0949944354208  
GCGCTACC -1.52075052441  
GCGCTAGA -0.169353055388  
GCGCTAGC -0.555683153947  
GCGCTATA -0.539733910471  
GCGCTCAA -0.665597512127  
GCGCTCAC -0.508116147351  
GCGCTCCA -0.266060324393  
GCGCTCCC -1.74867527426  
GCGCTCGA -0.197270962047  
GCGCTCTA 0.142360962334  
GCGCTGAA 0.457129746744  
GCGCTGAC 0.448139265441  
GCGCTGCA -0.228415624482  
GCGCTGCC -1.32476242323  
GCGCTGGA 0.31740089706  
GCGCTGTA 0.672988338075  
GCGCTTAA -0.148379012151  
GCGCTTAC 0.0944471023633  
GCGCTTCA -0.323620210704  
GCGCTTCC -0.483532947066  
GCGCTTGA -0.935564707204  
GCGCTTTA -0.17861563493  
GCGGAAAA 1.40543785217  
GCGGAAAC -0.159177208557  
GCGGAAACA -0.204591999109  
GCGGAAACC -1.27554191667



GCGGAAGA 0.452661167015  
GCGGAAGC -0.41937971005  
GCGGAATA 1.89210763975  
GCGGACAA -0.756163097821  
GCGGACAC -0.874869810056  
GCGGACCA -0.594698538936  
GCGGACCC -1.6879223504  
GCGGACGA -0.265193321646  
GCGGACGC -0.431974904914  
GCGGACTA 0.391701751695  
GCGGAGAA -0.777691531418  
GCGGAGAC -0.797142242726  
GCGGAGCA -0.881386575954  
GCGGAGCC -0.298820325078  
GCGGAGGA -0.726850720359  
GCGGAGTA -0.227792752144  
GCGGATAA 1.28120631719  
GCGGATAC 5.46460435098  
GCGGATCA 0.867512963715  
GCGGATCC 5.59538532456  
GCGGATGA -0.746548698654  
GCGGATTA 3.31067547353  
GCGGCAAA -0.382618218545  
GCGGCAAC -1.40481497984  
GCGGCACA -0.85540785934  
GCGGCACC -1.55806823595  
GCGGCAGA -0.57479694438  
GCGGCAGC -1.13679925974  
GCGGCATA 0.962894766658  
GCGGCCAA -0.30979495406  
GCGGCCAC -0.526596087419  
GCGGCCCA -1.14118811808  
GCGGCCCC -1.97709481947  
GCGGCCGA -0.776389066936  
GCGGCCGC -0.564826020719  
GCGGCCTA -0.918810147037  
GCGGCGAA -0.265291601126  
GCGGCGAC -1.02368114736  
GCGGCGCA 0.56984114936  
GCGGCGCC -0.923745554292  
GCGGCGGA -0.448502063094  
GCGGCGTA 0.219826102544  
GCGGCTAA -0.238866183368  
GCGGCTAC -0.816658560813  
GCGGCTCA -1.25458721567  
GCGGCTCC -1.59885814058  
GCGGCTGA -0.806971497563  
GCGGCTTA -0.899572984492  
GCGGAAA -0.281846465755  
GCGGAAAC -0.717189272505  
GCGGACA -0.20552696107  
GCGGACC -0.733806868717  
GCGGAGA 0.0139522880988  
GCGGAGC -0.678499046218

GCGGGATA 0.959153611905  
GCGGGCAA 0.231110991478  
GCGGGCAC -0.781766209085  
GCGGGCCA -1.60927576539  
GCGGGCCC -1.49455329279  
GCGGGCGA -0.422079259152  
GCGGGCTA -1.61799754641  
GCGGGGAA -0.0351733369414  
GCGGGGAC -0.32327022075  
GCGGGGCA -0.281755243578  
GCGGGGCC -1.02596771355  
GCGGGGGA 0.397381050966  
GCGGGGTA -0.128285824886  
GCGGGTAA 0.772386791971  
GCGGGTAC -0.0228970276224  
GCGGGTCA -0.446864246027  
GCGGGTCC -1.36556853352  
GCGGGTGA 0.220961021425  
GCGGGTTA 0.205811344245  
GCGGTAAA -0.0797692189599  
GCGGTAAAC -0.890254730671  
GCGGTACA 0.360929819412  
GCGGTACC -0.157863243285  
GCGGTAGA 0.245562518421  
GCGGTAGC -0.793723371478  
GCGGTATA 0.948314639971  
GCGGTCAA -0.119948536187  
GCGGTCAC -1.08188298687  
GCGGTCCA -0.885570772509  
GCGGTCCC -1.00497406669  
GCGGTCGA -0.503826091251  
GCGGTCTA -0.711389214937  
GCGGTGAA -0.522052229791  
GCGGTGAC -0.91506663985  
GCGGTGCA -0.19668599004  
GCGGTGCC -0.376040812117  
GCGGTGGA -0.266060324393  
GCGGTGTA 0.389645201314  
GCGGTTAA 1.87740100437  
GCGGTTAC -0.489576089517  
GCGGTTCA 0.263590268331  
GCGGTTCC -0.0151622234968  
GCGGTTGA 0.0364580274752  
GCGGTTTA -0.410904934632  
GCGTAAAA 2.78883600836  
GCGTAAAC 0.0615600702234  
GCGTAAACA 0.334114681698  
GCGTAAACC -0.316178153964  
GCGTAAGA 0.528161240403  
GCGTAAGC -1.07903967789  
GCGTAATA 3.13178747898  
GCGTACAA -0.559190372173  
GCGTACAC 0.32818184228  
GCGTACCA -1.11045199508

GCGTACCC -0.0604544260814  
GCGTACGA 1.38827658225  
GCGTACGC 0.093276635586  
GCGTACTA -0.30068345308  
GCGTAGAA 0.199119975442  
GCGTAGAC -0.352577631962  
GCGTAGCA 0.0819561987558  
GCGTAGCC 0.159864642149  
GCGTAGGA 0.157371584507  
GCGTAGTA 0.0998801801733  
GCGTATAA 0.771761044435  
GCGTATAC -0.15381836312  
GCGTATCA 3.3700266079  
GCGTATCC 9.34340840167  
GCGTATGA 1.67089307818  
GCGTATTA 0.919094530211  
GCGTCAAA 0.517596980523  
GCGTCAAC -0.622609388292  
GCGTCACA -0.293096852318  
GCGTCACC -0.651280073942  
GCGTCAGA 0.320690907182  
GCGTCAGC -1.52307002468  
GCGTCATA -0.547617963487  
GCGTCCAA -0.384675814451  
GCGTCCAC -1.28896595257  
GCGTCCCA -0.859805343275  
GCGTCCCC -0.859360471802  
GCGTCCGA -0.88042495307  
GCGTCCTA 0.272138753359  
GCGTCGAA -0.0969375461896  
GCGTCGAC -1.12611920781  
GCGTCGCA -0.721287213134  
GCGTCGCC -1.02202712464  
GCGTCGGA -1.50765687485  
GCGTCGTA -0.0156081404959  
GCGTCTAA 0.120394191804  
GCGTCTAC -0.510873461785  
GCGTCTCA -1.04822723146  
GCGTCTCC -1.49852211091  
GCGTCTGA -1.26781573814  
GCGTCTTA -0.400448886733  
GCGTGAAA 0.233787016236  
GCGTGAAC -0.475283743964  
GCGTGACA -0.412721798091  
GCGTGACC -0.136686367932  
GCGTGAGA 0.422118727772  
GCGTGAGC -0.872137849637  
GCGTGATA 2.38143567813  
GCGTGCAA -0.739901241959  
GCGTGCAC -0.488759010654  
GCGTGCCA -0.907655426137  
GCGTGCCC -1.70794365773  
GCGTGCGA 0.534406169443  
GCGTGCTA -0.0306778349085

GCGTGGAA -0.198638771927  
GCGTGGAC -1.02260190276  
GCGTGGCA 0.308960624012  
GCGTGGCC -1.23153623429  
GCGTGGGA -0.115540596988  
GCGTGGTA 0.0492312232041  
GCGTGTAA 0.619854949056  
GCGTGTAC 0.121170233757  
GCGTGTCA -0.147272845246  
GCGTGTCC -0.563605630057  
GCGTGTGA -0.331645148399  
GCGTGTTA 0.162113046619  
GCGTAAAA -0.30586900252  
GCGTTAAC 2.57122119409  
GCGTTACA -0.101444287631  
GCGTTACC -0.169030771883  
GCGTTAGA -0.967462148629  
GCGTTAGC -0.380469661843  
GCGTTATA 1.22566351264  
GCGTTCAA -0.494977278772  
GCGTTCAC -0.66695251431  
GCGTTCCA -0.620808207729  
GCGTTCCC 0.0666421125529  
GCGTTCGA 0.0967948318394  
GCGTTCTA -0.328299986761  
GCGTTGAA -0.553026471427  
GCGTTGAC -0.676142429768  
GCGTTGCA -0.970047212592  
GCGTTGCC -1.24701028603  
GCGTTGGA 0.818950354628  
GCGTTGTA -0.542931914272  
GCGTTTAA 0.430737263067  
GCGTTTAC 0.964340206872  
GCGTTTCA 0.388209693601  
GCGTTTCC -0.822269639489  
GCGTTTGA -0.225536506225  
GCGTTTTA 0.132638873951  
GCTAAAAA 0.808288599414  
GCTAAAAC -0.181378699758  
GCTAAACA -0.203905872425  
GCTAAACC -0.24880940058  
GCTAAAGA 1.36417197166  
GCTAAAGC -0.349167647688  
GCTAAATA 2.00290076285  
GCTAACAA 0.303467428436  
GCTAACAC 0.164714839005  
GCTAACCA -0.409363305992  
GCTAACCC -0.590928370827  
GCTAACGA 1.53855061096  
GCTAACTA -0.52517783089  
GCTAAGAA 0.888294368717  
GCTAAGAC -0.908181325904  
GCTAAGCA -0.66615059558  
GCTAAGCC -0.663481105361

GCTAAGGA 0.153308669012  
GCTAAGTA 0.0525993864226  
GCTAATAA 1.42012331564  
GCTAATAC 1.24033878223  
GCTAATCA -0.217451189383  
GCTAATCC 1.68326400763  
GCTAATGA -0.238866183368  
GCTAATTA 0.613762144103  
GCTACAAA 1.66353178835  
GCTACAAC -0.392393367392  
GCTACACA -0.110533571176  
GCTACACC -0.222154489782  
GCTACAGA 0.711027985575  
GCTACAGC 0.767967351982  
GCTACATA 0.315678130975  
GCTACCAA 0.0578683165917  
GCTACCAC -0.704204880449  
GCTACCCA -0.925820401384  
GCTACCCC -0.844957823217  
GCTACCGA 1.08404879476  
GCTACCTA -0.865272400692  
GCTACGAA 0.667117968859  
GCTACGAC -0.383731704134  
GCTACGCA 0.162286081235  
GCTACGCC -0.816032290514  
GCTACGGA -0.170588083419  
GCTACGTA -0.0541749946704  
GCTACTAA 0.0462995672473  
GCTACTAC -1.02802374116  
GCTACTCA -0.21546651894  
GCTACTCC -1.27038616473  
GCTACTGA -0.258394002245  
GCTACTTA -0.00203511708982  
GCTAGAAA 0.464549063286  
GCTAGAAC 0.605159030323  
GCTAGACA -0.359101716545  
GCTAGACC -0.843065943241  
GCTAGAGA 1.0286296237  
GCTAGAGC -0.882164447577  
GCTAGATA 1.24330807713  
GCTAGCAA -0.254539669262  
GCTAGCAC -0.0841586000657  
GCTAGCCA -0.793537006402  
GCTAGCCC -0.670820439136  
GCTAGCGA 0.328938803376  
GCTAGCTA -0.255510963265  
GCTAGGAA -0.622698258034  
GCTAGGAC -0.759467222549  
GCTAGGCA -0.559190372173  
GCTAGGCC -1.31129656628  
GCTAGGGA -0.24954911049  
GCTAGGTA 0.171449074389  
GCTAGTAA 0.528569518452  
GCTAGTAC -0.995623401552

GCTAGTCA 0.0960185285056  
GCTAGTCC -0.409713034564  
GCTAGTGA -0.570686457435  
GCTAGTTA -0.623390657876  
GCTATAAA 0.241134452839  
GCTATAAC -0.0164691314661  
GCTATACA -0.176780213377  
GCTATACC 0.458545389456  
GCTATAGA -0.314723565394  
GCTATAGC -0.819984902977  
GCTATATA 2.71144928262  
GCTATCAA 0.297781071861  
GCTATCAC 0.640565258264  
GCTATCCA 1.53504391549  
GCTATCCC 1.74849648925  
GCTATCGA 0.0190745831938  
GCTATCTA 1.11560591735  
GCTATGAA 0.263590268331  
GCTATGAC -0.923954136804  
GCTATGCA -0.811265213005  
GCTATGCC -0.838999368404  
GCTATGGA 1.00634370624  
GCTATGTA 0.135558244972  
GCTATTAA -0.221124123539  
GCTATTAC 0.61410769057  
GCTATTCA 0.280264322967  
GCTATTCC 0.593945237183  
GCTATTGA 0.371583210415  
GCTATTTA 0.689043702478  
GCTCAAAA -0.482687900373  
GCTCAAAC -0.740966110573  
GCTCAACA -0.303503237714  
GCTCAACC -0.674500430596  
GCTCAAGA -0.622184120439  
GCTCAAGC -0.751441239328  
GCTCAATA 0.0257941812088  
GCTCACAA -0.69371772814  
GCTCACAC -0.788777508959  
GCTCACCA -1.2175128504  
GCTCACCC -1.03159003163  
GCTCACGA -0.344501986238  
GCTCACTA -0.71219479301  
GCTCAGAA -0.532881269225  
GCTCAGAC -0.167536714692  
GCTCAGCA -0.805878138356  
GCTCAGCC -1.07313872703  
GCTCAGGA 0.30899146704  
GCTCAGTA -0.469279808753  
GCTCATAA -0.753505631157  
GCTCATAC -0.101961823187  
GCTCATCA -0.803713898759  
GCTCATCC -0.707716542162  
GCTCATGA -0.672846146488  
GCTCATTAA -0.140802082509

GCTCCAAA -0.348366774485  
GCTCCAAC -0.728465797228  
GCTCCACA -1.12161769401  
GCTCCACC -1.31480012516  
GCTCCAGA -1.07404833497  
GCTCCAGC -1.51659194325  
GCTCCATA -0.882559917929  
GCTCCCAA -0.854403631256  
GCTCCCAC -0.471978835091  
GCTCCCCA -1.10021550772  
GCTCCCCC -0.823264196453  
GCTCCCGA -1.03089057449  
GCTCCCTA -1.15998694369  
GCTCCGAA -0.471254808076  
GCTCCGAC -0.71367238316  
GCTCCGCA -0.861935864647  
GCTCCGCC -0.427055703317  
GCTCCGGA -0.220886789052  
GCTCCGTA -0.266091428803  
GCTCCTAA 0.375500274981  
GCTCCTAC -0.421888189207  
GCTCCTCA -0.312790125744  
GCTCCTCC -1.58007264543  
GCTCCTGA -1.22854132399  
GCTCCTTA 0.358122581094  
GCTCGAAA 0.359674664998  
GCTCGAAC -1.08868256765  
GCTCGACA -0.621572226128  
GCTCGACC -1.35560022367  
GCTCGAGA -0.54949781991  
GCTCGAGC 0.960637475213  
GCTCGATA 0.939401266238  
GCTCGCAA -0.971408487933  
GCTCGCAC -0.854808772727  
GCTCGCCA -0.167649108777  
GCTCGCCC -1.42528142002  
GCTCGCGA -0.150590823199  
GCTCGCTA -0.461095428286  
GCTCGGAA 0.53983872449  
GCTCGGAC -1.64066246718  
GCTCGGCA -0.710357803168  
GCTCGGCC -0.33145172602  
GCTCGGGA -1.15745232638  
GCTCGGTA -1.13814694324  
GCTCGTAA 0.470035985704  
GCTCGTAC 0.399033505402  
GCTCGTCA -0.579158880418  
GCTCGTCC -1.28220270383  
GCTCGTGA -0.0430811756821  
GCTCGTTA -1.22464203337  
GCTCTAAA 0.196364229298  
GCTCTAAC -0.71708837921  
GCTCTACA -0.0989062723546  
GCTCTACC -1.23625626311

GCTCTAGA -0.223163422735  
GCTCTATA -0.0638597054863  
GCTCTCAA -0.264463021473  
GCTCTCAC -0.625852872491  
GCTCTCCA -1.513014152  
GCTCTCCC -1.31383092221  
GCTCTCGA -0.21519755728  
GCTCTCTA -0.569874083441  
GCTCTGAA -0.912294426665  
GCTCTGAC -1.90093371203  
GCTCTGCA -0.776068090339  
GCTCTGCC -1.62425136242  
GCTCTGGA -0.359101716545  
GCTCTGTA 1.10327550204  
GCTCTTAA -0.404566430981  
GCTCTTAC 0.0806082538762  
GCTCTTCA -0.348415914224  
GCTCTTCC -0.595760793734  
GCTCTTGA -0.49725966285  
GCTCTTTA -0.338830528414  
GCTGAAAA -0.0140022119832  
GCTGAAAC 0.117934068243  
GCTGAACA -0.00723739495247  
GCTGAACC -1.24537874212  
GCTGAAGA -0.268283113467  
GCTGAAGC -0.457989169425  
GCTGAATA 1.14033000231  
GCTGACAA -0.280518124495  
GCTGACAC 0.0713132630169  
GCTGACCA -0.737012713965  
GCTGACCC -1.12546261725  
GCTGACGA -0.0197191502042  
GCTGACTA -0.934066990671  
GCTGAGAA -0.0748999412478  
GCTGAGAC -0.701630794512  
GCTGAGCA -0.233770549195  
GCTGAGCC -0.923455420723  
GCTGAGGA -0.298670814807  
GCTGAGTA 0.27374442049  
GCTGATAA 1.20016547678  
GCTGATAC 1.46602506011  
GCTGATCA 0.658630908506  
GCTGATCC 0.762135928623  
GCTGATGA -0.152545957521  
GCTGATTA 2.03244106506  
GCTGCAA 0.407796584718  
GCTGCAAC -0.569797498634  
GCTGCACA -0.645319266694  
GCTGCACC -1.70864050106  
GCTGCAGA -0.213180214139  
GCTGCAGC -0.766851775339  
GCTGCATA 0.20626327302  
GCTGCCAA 0.081341429247  
GCTGCCAC -1.15265728104



GCTGCCCA -1.21084579008  
GCTGCCCC -1.22357272127  
GCTGCCGA -0.949400680493  
GCTGCCTA -0.643788354698  
GCTGCGAA -0.307238903454  
GCTGCGAC -1.61736134361  
GCTGCGCA -0.839393531847  
GCTGCGCC 0.12491138851  
GCTGCGGA -0.644283672819  
GCTGCGTA 0.157116998834  
GCTGCTAA -0.440069631494  
GCTGCTAC -0.173109893036  
GCTGCTCA -1.1235064374  
GCTGCTCC -0.897433314765  
GCTGCTGA 0.130824885689  
GCTGCTTA 0.0625794584395  
GCTGGAAA -0.297970834898  
GCTGGAAC -0.266015889522  
GCTGGACA -0.515469334349  
GCTGGACC -0.968909941278  
GCTGGAGA 0.573334775744  
GCTGGATA 1.65398665531  
GCTGGCAA -0.404904658764  
GCTGGCAC -1.56039975977  
GCTGGCCA -1.38649605083  
GCTGGCCC -1.80817095266  
GCTGGCGA -0.744929701062  
GCTGGCTA -1.32506196654  
GCTGGGAA -0.716188442382  
GCTGGGAC -1.57254015066  
GCTGGGCA -1.13210144835  
GCTGGGCC -0.90978281093  
GCTGGGGA -0.241344080878  
GCTGGGTA 0.405816880526  
GCTGGTAA 0.0916871741137  
GCTGGTAC -0.803496429273  
GCTGGTCA -1.31622831419  
GCTGGTCC -1.2292980237  
GCTGGTGA -0.758438685978  
GCTGGTTA 0.609965315071  
GCTGTAAA -0.316683927348  
GCTGTAAAC 0.169188646365  
GCTGTACA 0.26552187831  
GCTGTACC -0.384874987226  
GCTGTAGA -0.0722500546493  
GCTGTATA 0.885531042506  
GCTGTCAA -0.0116126614521  
GCTGTCAC -0.716610050893  
GCTGTCCA -0.705655025531  
GCTGTCCC -0.569243108273  
GCTGT CGA -0.444259055681  
GCTGTCTA -0.821733023076  
GCTGTGAA 1.23966337219  
GCTGTGAC -0.541275800493

GCTGTGCA 0.0944167820984  
GCTGTGCC -0.933161826211  
GCTGTGGA 0.101903796473  
GCTGTGTA 0.48992764776  
GCTGTTAA -0.385822756885  
GCTGTTAC -0.742208457288  
GCTGTTC A -1.01049026385  
GCTGTTC C -1.02512292824  
GCTGTTGA -0.265595326538  
GCTGTTTA -0.197270962047  
GCTTAAAA 0.676813657701  
GCTTAAAC -0.261429426695  
GCTTAAACA -0.0177433667362  
GCTTAAACC -0.905731134843  
GCTTAAAGA 0.344837861586  
GCTTAAAGC -0.219899812154  
GCTTAAATA -0.0302967405447  
GCTTACAA 0.351582290852  
GCTTACAC 0.706728519737  
GCTTACCA -0.745582632283  
GCTTACCC -1.01038074496  
GCTTACGA -0.352014093246  
GCTTACTA -0.332663491089  
GCTTAGAA -0.118418669718  
GCTTAGAC -0.934395024571  
GCTTAGCA -0.501709945867  
GCTTAGCC -0.517438321896  
GCTTAGGA 0.46080738577  
GCTTAGTA -0.0499897525895  
GCTTATAA 0.695767482599  
GCTTATAC 0.306176125893  
GCTTATCA 0.293833164268  
GCTTATCC -0.448836108771  
GCTTATGA -0.209452389847  
GCTTATTA 0.073920283034  
GCTTCAA 0.546793043176  
GCTTCAAC -0.74829943257  
GCTTCACA -0.824245422957  
GCTTCACC -1.03006408589  
GCTTCAGA 0.209738341311  
GCTTCATA 0.368385990759  
GCTTCCAA -0.0447135037358  
GCTTCCAC -0.769013401121  
GCTTCCCA -1.07692091869  
GCTTCCC -1.44380187423  
GCTTCCGA -0.342315529205  
GCTTCCTA -0.490128911588  
GCTTCGAA 0.536321835145  
GCTTCGAC -0.739912219986  
GCTTCGCA -0.2241153745  
GCTTCGCC -0.398833809865  
GCTTCGGA 0.0969568884276  
GCTTCGTA -0.00199434156118  
GCTTCTAA -0.0687742022141

GCTTCTAC -0.842939957313  
GCTTCTCA -0.0888566728338  
GCTTCTCC -0.518474438534  
GCTTCTGA -0.218823965513  
GCTTCTTA -0.481163261536  
GCTTGAAA -0.305911084957  
GCTTGAAC -0.112739109065  
GCTTGACA 0.197787452076  
GCTTGACC -1.43979672407  
GCTTGAGA -0.887716715394  
GCTTGATA 1.60383327784  
GCTTGCAA -0.279934982159  
GCTTGCAC -0.0873354319575  
GCTTGCCA 0.159839549516  
GCTTGCCC -0.887362281953  
GCTTGCGA -0.0239049150483  
GCTTGCTA -0.714019759298  
GCTTGCAA 0.371551060479  
GCTTGGAC -1.19122256692  
GCTTGGCA -0.39457747199  
GCTTGGCC -0.803396842885  
GCTTGGGA -1.04315851959  
GCTTGGTA -0.301740480245  
GCTTGTAA 1.424750554  
GCTTGTAC -1.13677887198  
GCTTGTCA -0.584183680178  
GCTTGTCC -0.829672750372  
GCTTGTGA 0.629896707129  
GCTTGTTA -0.354329934167  
GCTTTAAA 0.838291808429  
GCTTTAAC -0.791053097115  
GCTTTACA 0.97697382483  
GCTTTACC 0.554805434555  
GCTTTAGA -0.877249689468  
GCTTTATA -0.357170629329  
GCTTTCAA -0.338173415087  
GCTTTCAC 0.324229752581  
GCTTTCOA -0.297970834898  
GCTTTCOC -1.28972369781  
GCTTTCOA -0.503017115218  
GCTTTCOA 0.0607320133341  
GCTTTGAA 1.08546522161  
GCTTTGAC -0.281233787299  
GCTTTGCA -0.454135881968  
GCTTTGCC -1.73112140918  
GCTTTGGA -0.139626910863  
GCTTTGTA -0.034302152089  
GCTTTTAA 0.478103528599  
GCTTTTAC 0.542224354297  
GCTTTTCA 0.129213990926  
GCTTTTCC -0.14825250346  
GCTTTTGA 0.345004361661  
GCTTTTTA 0.288873709906  
GGAAAAAA 1.26477011981

GGAAAAAC 0.781463790581  
GGAAAACA -0.0382521507355  
GGAAAACC -0.277338417405  
GGAAAAGA 1.13163435945  
GGAAAATA 3.98636257656  
GGAAACAA 1.67969458059  
GGAAACAC -0.10267905428  
GGAAACCA 0.214235673015  
GGAAACCC -0.162763364025  
GGAAACGA -0.459718992813  
GGAAACTA 0.538986097731  
GGAAAGAA 0.296692156141  
GGAAAGAC 0.662969058819  
GGAAAGCA -0.259331578022  
GGAAAGCC -0.845256843761  
GGAAAGGA 0.740074276574  
GGAAAGTA 0.561910570421  
GGAAATAA 1.00367787537  
GGAAATAC 1.32983061233  
GGAAATCA 12.2207908229  
GGAAATCC 29.2895238239  
GGAAATGA 0.934205784297  
GGAAATTA 2.06210839873  
GGAACAAA 0.0603848985774  
GGAACAAC -0.0340483505614  
GGAACACA -0.91978640729  
GGAACACC -0.855595269943  
GGAACAGA 0.0663872654989  
GGAACATA 0.31418172135  
GGAACCAA -0.128882559065  
GGAACCAC -0.95931017948  
GGAACCCA -0.0827016590615  
GGAACCCC -0.415573732662  
GGAACCGA 0.483530856014  
GGAACCTA -0.829322499036  
GGAACGAA -0.480856660927  
GGAACGAC -0.629720797317  
GGAACGCA -0.140917613173  
GGAACGCC -1.06966810222  
GGAACGGA -1.0257539034  
GGAACGTA -0.0119095909428  
GGAACTAA -0.25840132093  
GGAACTAC -0.411876751398  
GGAACTCA -0.096062701995  
GGAACTCC -1.19458184317  
GGAACTGA -0.11130987451  
GGAACTTA 0.0652489486576  
GGAAGAAA 0.0447325845921  
GGAAGAAC -0.716030045137  
GGAAGACA -0.941466703593  
GGAAGACC -1.1935760468  
GGAAGAGA -0.639505355901  
GGAAGATA 0.894742652637  
GGAAGCAA -1.05988720298

GGAAGCAC -0.243575756926  
GGAAGCCA -1.25434203974  
GGAAGCCC -1.14868846292  
GGAAGCGA 0.234666303918  
GGAAGCTA 0.276682872368  
GGAAGGAA -0.415624963454  
GGAAGGAC -1.06951127327  
GGAAGGCA -1.18670537022  
GGAAGGCC -1.72175506115  
GGAAGGGA -1.07598412706  
GGAAGGTA -0.023494545946  
GGAAGTAA 0.643774501474  
GGAAGTAC 0.000813419520102  
GGAAGTCA -0.268291216297  
GGAAGTCC -1.35105113841  
GGAAGTGA -0.543239299026  
GGAAGTTA 0.878260974855  
GGAATAAA 0.510389121691  
GGAATAAC 0.454035250054  
GGAATACA 1.20190000503  
GGAATACC 0.759809893819  
GGAATAGA 1.42637556337  
GGAATATA 4.32773660926  
GGAATCAA 6.34713656246  
GGAATCAC 5.51610776438  
GGAATCCA 17.2564619666  
GGAATCCC 10.8791724235  
GGAATCGA 4.00967886026  
GGAATCTA 22.8938889522  
GGAATGAA 0.0345962063821  
GGAATGAC -0.553195323936  
GGAATGCA 0.0962887970737  
GGAATGCC -1.37434442053  
GGAATGGA 0.216436506035  
GGAATGTA 0.871832033172  
GGAATTAA 0.433070093792  
GGAATTAC 3.11305373738  
GGAATTCA 0.930406341449  
GGAATTCC 2.17913390455  
GGAATTGA 2.70723607271  
GGAATTTA 3.30814739075  
GGACAAAA 0.15269834299  
GGACAAAC 0.406530452278  
GGACAACA 0.737971723033  
GGACAACC -0.87814701248  
GGACAAGA -0.055158050845  
GGACAATA 0.825181430444  
GGACACAA 0.30903407224  
GGACACAC -0.975750297589  
GGACACCA -0.432991417932  
GGACACCC -1.03901692824  
GGACACGA 0.372075653338  
GGACACTA -0.654417175831  
GGACAGAA 0.0141242771876

GGACAGAC -1.70543491719  
GGACAGCA 0.0607320133341  
GGACAGCC -0.864239159252  
GGACAGGA -0.505410847854  
GGACAGTA -0.293099988897  
GGACATAA 1.22220674106  
GGACATAC -0.479229821887  
GGACATCA 0.352691071574  
GGACATCC 0.687891009649  
GGACATGA -0.0431943539123  
GGACATTA -0.0905342199032  
GGACCAA -0.180301023447  
GGACCAAC -0.730735634989  
GGACCACA -0.119678267619  
GGACCACC -1.40956715859  
GGACCAGA -0.373232266891  
GGACCATA 1.05820965591  
GGACCCAA -1.17513270015  
GGACCCAC -1.02854389054  
GGACCCCA -1.39487908131  
GGACCCCC -1.32291158016  
GGACCCGA -0.775158482392  
GGACCCTA -0.745389209904  
GGACCGAA -0.0791821559001  
GGACCGAC -0.28120947881  
GGACCGCA -1.0763129451  
GGACCGCC -1.20825053224  
GGACCGGA -0.407582251811  
GGACCGTA 0.358682460468  
GGACCTAA -0.373017149839  
GGACCTAC -0.140599511773  
GGACCTCA -0.0296072159001  
GGACCTCC -0.861020244924  
GGACCTGA -1.52439653627  
GGACCTTA -1.80227758186  
GGACGAAA -0.129251368494  
GGACGAAC -0.183905475626  
GGACGACA -0.7319411269  
GGACGACC -1.22954058582  
GGACGAGA -0.412804917438  
GGACGATA 0.704043869387  
GGACGCAA 0.44236482327  
GGACGCAC -0.467285467192  
GGACGCCA -0.88774389908  
GGACGCC -1.58949780432  
GGACGCGA -0.0189485972655  
GGACGCTA -1.12673450009  
GGACGGAA 1.92699188865  
GGACGGAC -1.23656234096  
GGACGGCA -0.721583881243  
GGACGGCC -1.14338503038  
GGACGGGA -0.892550967973  
GGACGGTA -0.204771045501  
GGACGTAA 0.237511181185

GGACGTAC -0.317539429305  
GGACGTCA -0.790084155547  
GGACGTCC -1.29291072358  
GGACGTGA -0.258559195413  
GGACGTTA 0.187005461329  
GGACTAAA -0.16731819968  
GGACTAAC -0.651942676282  
GGACTACA -0.275660870336  
GGACTACC -0.560119583739  
GGACTAGA 0.073171163386  
GGACTATA -0.419603191313  
GGACTCAA 0.166798050308  
GGACTCAC -0.870007328265  
GGACTCCA -0.867775913599  
GGACTCCC -1.10070664373  
GGACTCGA -0.664246430668  
GGACTCTA -1.31381131859  
GGACTGAA 0.280795188984  
GGACTGAC -1.02708642677  
GGACTGCA -0.738422344901  
GGACTGCC -1.26595156461  
GGACTGGA -0.497753151299  
GGACTGTA 0.0624566090904  
GGACTTAA -0.79302025499  
GGACTTAC -0.171341385172  
GGACTTCA -0.270481332672  
GGACTTGA 0.0713702442043  
GGACTTTA -0.865148244435  
GGAGAAAA -0.0949369314702  
GGAGAAAC -1.19731014425  
GGAGAAC A 0.0661068030487  
GGAGAAC C -0.100980858065  
GGAGAA G A -0.560234330259  
GGAGAA T A 2.4627243083  
GGAGAA C A A -0.774782877042  
GGAGAA C A C -0.654515193929  
GGAGAA C C A -0.585785687967  
GGAGAA C C C -1.24775182561  
GGAGAA C G A -0.759603140978  
GGAGAA C T A -0.894950189623  
GGAGAA G A A 0.212221466453  
GGAGAA G A C -0.847804268775  
GGAGAA G A C A -1.05374316724  
GGAGAA G A C C -1.46814695588  
GGAGAA G A G A -1.20517250259  
GGAGAA G A T A -0.66080455784  
GGAGAA T A A 1.58516331335  
GGAGAA T A C 3.73505175413  
GGAGAA T C A 2.93665200455  
GGAGAA T C C 6.71478885509  
GGAGAA T G A -0.508858209696  
GGAGAA T T A 2.93423971382  
GGAGAA C A A A 0.60838108123  
GGAGAA C A A C -0.872727265131

GGAGCACA -0.519849305718  
GGAGCACC -1.95784772442  
GGAGCAGA -0.281932198917  
GGAGCATA -0.325935006099  
GGAGCCAA -0.974156131248  
GGAGCCAC -0.162914442586  
GGAGCCCA -1.20231141966  
GGAGCCCC -1.19955933286  
GGAGCCGA -0.810619077705  
GGAGCCTA -0.306104507336  
GGAGCGAA 0.321626391906  
GGAGCGAC -0.658955021682  
GGAGCGCA 0.29592944465  
GGAGCGCC -1.82088298509  
GGAGCGGA 0.823572888116  
GGAGCGTA -0.746595224578  
GGAGCTAA 0.0298489938744  
GGAGCTAC -1.1272057711  
GGAGCTCA -1.42939060005  
GGAGCTCC -0.0182998481495  
GGAGCTGA -0.629416810523  
GGAGCTTA -0.365403888154  
GGAGGAAA -0.0171220626876  
GGAGGAAC -0.941879163748  
GGAGGACA -1.74016887167  
GGAGGACC -1.56891165137  
GGAGGAGA -0.291341152152  
GGAGGATA 1.86794761627  
GGAGGCAA -0.443812354537  
GGAGGCAC -1.20300068293  
GGAGGCCA -0.602975709869  
GGAGGCCC -1.49178578447  
GGAGGCCG -0.690199270505  
GGAGGCTA -1.22283823899  
GGAGGGAA 0.604641494767  
GGAGGGAC -1.8388738802  
GGAGGGCA -0.620754624502  
GGAGGGCC -1.60176104456  
GGAGGGGA -1.26601220514  
GGAGGGTA -0.490405191932  
GGAGGTAA 0.373362173543  
GGAGGTAC -0.465998946987  
GGAGGTCA -0.799980324072  
GGAGGTGA 0.0186009597457  
GGAGGTTA -0.904063520275  
GGAGTAAA 0.0462316080329  
GGAGTAAC -0.211077137835  
GGAGTACA 0.380808935152  
GGAGTACC -0.597896281356  
GGAGTAGA 0.716573196089  
GGAGTATA 0.542000611653  
GGAGTCAA -1.14039587047  
GGAGTCAC -0.299888330271  
GGAGTCCA -0.633759927087



GGAGTCCC -1.23213558229  
GGAGTCGA -0.322183134701  
GGAGTCTA 0.0953621993234  
GGAGTGAA -0.316408169766  
GGAGTGAC -0.894148270893  
GGAGTGCA -0.812556960842  
GGAGTGCC -1.47699655251  
GGAGTGGA -0.551840321754  
GGAGTGTA 0.0439186423088  
GGAGTTAA 0.142469697077  
GGAGTTAC -0.809776122065  
GGAGTTCA 0.0656350092718  
GGAGTTGA -0.631643520321  
GGAGTTTA 0.00678442065031  
GGATAAAA 0.737125630814  
GGATAAAC 0.333575190088  
GGATAACA 1.85725946151  
GGATAACC 0.350495204804  
GGATAAGA 1.18687004062  
GGATAATA 1.70938099511  
GGATACAA 0.929879657537  
GGATACAC 3.09507172925  
GGATACCA 2.49280096554  
GGATACCC 4.89134302347  
GGATACGA 2.61716005474  
GGATACTA 2.25231944392  
GGATAGAA 0.241294418375  
GGATAGAC -1.01897392624  
GGATAGCA 0.281429039349  
GGATAGCC 1.38765841478  
GGATAGGA 1.80394911715  
GGATAGTA 0.936131905262  
GGATATAA 2.36173273359  
GGATATAC 3.46754363709  
GGATATCA 10.0395629904  
GGATATCC 29.6211721089  
GGATATGA 3.37719813469  
GGATATTA 4.80724506393  
GGATCAAA 0.99132158328  
GGATCAAC 0.146774129165  
GGATCACA 2.55316443083  
GGATCACC 1.36635503073  
GGATCAGA 1.71569675856  
GGATCATA 1.32428670873  
GGATCCAA 1.78711405146  
GGATCCAC 3.96454505492  
GGATCCCA 3.07329446038  
GGATCCCC 7.57608198239  
GGATCCGA 2.89313196918  
GGATCCTA 3.86793109914  
GGATCGAA 0.358541314407  
GGATCGAC -0.144832325304  
GGATCGCA 4.79992585654  
GGATCGCC 5.06133515685

GGATCGGA 1.0290697903  
GGATCGTA 2.48236791922  
GGATCTAA 1.44821007481  
GGATCTAC 3.47697637604  
GGATCTCA 5.4892027114  
GGATCTGA 3.41468548289  
GGATCTTA 3.72927234571  
GGATGAAA 1.73795915168  
GGATGAAC -0.141552509065  
GGATGACA -0.327444223422  
GGATGACC -0.0860324447121  
GGATGAGA -0.430915525314  
GGATGATA 0.884017120315  
GGATGCAA 0.0845768106158  
GGATGCAC 0.410685374094  
GGATGCCA -0.522375820204  
GGATGCCC -0.297076387084  
GGATGCGA 0.439334887834  
GGATGCTA -0.194596505578  
GGATGGAA 0.13111528064  
GGATGGAC -0.256014906978  
GGATGGCA -0.337096784302  
GGATGGCC -1.42253064012  
GGATGGGA 0.472082342202  
GGATGGTA 0.129255811981  
GGATGTAA 1.99370065351  
GGATGTAC 0.889134449159  
GGATGTCA 1.37347558811  
GGATGTGA 1.80088102  
GGATGTTA 1.11895264727  
GGATTAAC -0.413489737214  
GGATTAAA 0.962459304923  
GGATTACA 19.041406028  
GGATTACC 13.0995612305  
GGATTAGA 2.24525011734  
GGATTATA 2.57181714413  
GGATTCAA 1.64371279038  
GGATTCAC 2.93832955162  
GGATTCCA 8.43832026555  
GGATTCCC 23.9767515973  
GGATTCGA 5.07650417627  
GGATTCTA 6.90252252554  
GGATTGAA 0.151274597448  
GGATTGAC 0.73551133809  
GGATTGCA 16.3755341153  
GGATTGCC 11.6122986545  
GGATTGGA 1.50312817735  
GGATTGTA 4.69816555856  
GGATTTAA 1.76912289497  
GGATTTAC 2.82090021124  
GGATTTCA 12.3160194562  
GGATTTGA 5.2154954071  
GGATTTTA 8.61773233019  
GGCAAAA -0.263144351332

GGCAAAAC -0.489729259131  
GGCAAACA -0.490008414673  
GGCAAACC -0.0781949176201  
GGCAAAGA 0.370483316668  
GGCAAATA 2.05778828374  
GGCAACAA 0.196905027815  
GGCAACAC -0.779026929981  
GGCAACCA -0.478036614911  
GGCAACCC -0.756724545485  
GGCAACGA -0.576246566699  
GGCAACTA 0.0624330847469  
GGCAAGAA -0.207761250935  
GGCAAGAC 0.314202631877  
GGCAAGCA -0.889375965752  
GGCAAGCC -1.40877543375  
GGCAAGGA 0.0984943349627  
GGCAAGTA -0.0571552676037  
GGCAATAA 0.910318120434  
GGCAATAC 0.50760932844  
GGCAATCA 5.01056622573  
GGCAATGA -0.490734794122  
GGCAATTA 0.292749476179  
GGCACAAA -0.764484703625  
GGCACAAC -0.934886944731  
GGCACACA -0.993593512094  
GGCACACC -1.18293598625  
GGCACAGA 0.55129037488  
GGCACATA -0.586585254263  
GGCACCAA -0.308673365641  
GGCACCCAC -0.851976964539  
GGCACCCA -1.20772776905  
GGCACCCC -2.01186092389  
GGCACCGA -1.93363620876  
GGCACCTA -0.482126191328  
GGCACGAA -1.39960015566  
GGCACGAC -1.04003736198  
GGCACGCA -0.586062491075  
GGCACGCC -0.948496822942  
GGCACGGA -1.51005113025  
GGCACGTA -0.289417906384  
GGCACTAA -0.619885269321  
GGCACTAC -0.490222224817  
GGCACTCA -0.828583311888  
GGCACTGA -0.798496722145  
GGCACTTA -0.875773144844  
GGCAGAAA 0.898697356153  
GGCAGAAC 0.252615377968  
GGCAGACA -0.504076233436  
GGCAGACC -1.43846890557  
GGCAGAGA 0.102414536107  
GGCAGATA 2.7505216488  
GGCAGCAA 0.670855202888  
GGCAGCAC -1.2075751222  
GGCAGCCA -0.592846388962

GGCAGCCC -1.34643618499  
GGCAGCGA -0.347775006556  
GGCAGCTA -1.10187031459  
GGCAGGAA 0.140006436937  
GGCAGGAC -1.19611902832  
GGCAGGCA -0.239609291239  
GGCAGGCC -0.786621894954  
GGCAGGGA -0.50539699463  
GGCAGGTA -0.890079605003  
GGCAGTAA 0.999957631141  
GGCAGTAC -0.127115358109  
GGCAGTCA 0.244411916645  
GGCAGTGA -0.724196390274  
GGCAGTTA -0.70213055612  
GGCATAAA 0.180673230836  
GGCATAAC -0.460215617841  
GGCATAACA 1.05587499552  
GGCATAACC -0.595759748208  
GGCATAGA -0.0893527750989  
GGCATATA -1.27672780496  
GGCATCAA -0.559377521395  
GGCATCAC 0.802779982324  
GGCATCCA 0.681335559275  
GGCATCCC -0.3381689716  
GGCATCGA 0.1206001605  
GGCATCTA 0.337527279787  
GGCATGAA 0.910658177888  
GGCATGAC -1.28473444594  
GGCATGCA -0.379292399144  
GGCATGCC -1.23201377846  
GGCATGGA 0.324673055764  
GGCATGTA -0.310096849801  
GGCATTAA 0.403386554467  
GGCATTAC -0.218424574438  
GGCATTCA 0.519816110255  
GGCATTGA 0.746350832788  
GGCATTTA 0.775350597864  
GGCCAAAA 0.0265971454651  
GGCCAAAC -0.424464627577  
GGCCAACA -0.73794009586  
GGCCAACC -1.12652565619  
GGCCAAGA 0.355271430668  
GGCCAATA -0.231447912352  
GGCCACAA -0.295255080138  
GGCCACAC -1.40470546095  
GGCCACCA -1.30385398677  
GGCCACCC -1.06493003807  
GGCCACGA -0.657672422201  
GGCCACTA -0.874345478579  
GGCCAGAA 0.815929828929  
GGCCAGAC -1.00156068446  
GGCCAGCA -1.5446151867  
GGCCAGCC -1.66016153408  
GGCCAGGA -0.21602247759

GGCCAGTA -0.734096479523  
GGCCATAA -0.431503372518  
GGCCATAC -1.1443659955  
GGCCATCA -1.6056770636  
GGCCATGA -0.643872780953  
GGCCATTA -0.591180342683  
GGCCCAAA -1.05243599789  
GGCCCAAC -1.2077682832  
GGCCCACA -1.39833663703  
GGCCCACC -1.19672360395  
GGCCCAGA -0.675492635126  
GGCCCATA -0.0200056244311  
GGCCCCAA -0.474148825084  
GGCCCCAC -0.906620877789  
GGCCCCCA -1.69929454079  
GGCCCCCC -1.49127922694  
GGCCCCGA -0.509076724708  
GGCCCCCTA -1.48145964322  
GGCCCGAA -0.384449457991  
GGCCCGAC -1.29909004584  
GGCCCGCA -1.30439478529  
GGCCCGCC -1.44690447375  
GGCCCGGA -0.977823837773  
GGCCCGTA -0.773209098465  
GGCCCTAA -1.37125096937  
GGCCCTAC -1.60297594621  
GGCCCTCA -1.19429066407  
GGCCCTGA -0.527749564392  
GGCCCTTA -0.373275394854  
GGCCGAAA 0.0114602759829  
GGCCGAAC -1.16095457836  
GGCCGACA -0.68113952308  
GGCCGACC -1.50870867438  
GGCCGAGA -0.481176853379  
GGCCGATA 1.65944639404  
GGCCGCAA -0.216546286305  
GGCCGCAC -1.31752973315  
GGCCGCCA -1.13681389711  
GGCCGCCC -0.970599773282  
GGCCGCGA 0.0325153475134  
GGCCGCTA -0.356057143739  
GGCCGGAA -0.385439310087  
GGCCGGAC -1.30774334489  
GGCCGGCA -0.643626820873  
GGCCGGCC -1.37200348698  
GGCCGGGA -0.929847768983  
GGCCGGTA -1.08259708138  
GGCCGTAA -0.858586259521  
GGCCGTAC -1.23306505523  
GGCCGTCA -0.707673152818  
GGCCGTGA 0.0348583721208  
GGCCGTTA -0.316813834  
GGCCTAAA 0.740889787147  
GGCCTAAC -1.0698602177

GGCCTACA -1.34217540363  
GGCCTACC -1.35661281597  
GGCCTAGA -0.430728114711  
GGCCTATA 0.038323246529  
GGCCTCAA -1.02444699543  
GGCCTCAC -0.644404431115  
GGCCTCCA -0.987112294093  
GGCCTCCC -0.908066318003  
GGCCTCGA -0.647751683806  
GGCCTCTA -0.719092914653  
GGCCTGAA -1.17524587838  
GGCCTGAC -0.950426341868  
GGCCTGCA -1.43299113151  
GGCCTGGA -0.78750353507  
GGCCTGTA -0.777004359208  
GGCCTTAA -0.541316576022  
GGCCTTAC -1.23673067071  
GGCCTTCA -0.688973652211  
GGCCTTGA -1.30608853802  
GGCCTTTA -1.18409782744  
GGCGAAAA 0.0677574278139  
GGCGAAAC -0.26126632458  
GGCGAACA -0.336375893866  
GGCGAACC -0.639878347436  
GGCGAAGA -0.309924337949  
GGCGAATA 1.7138487907  
GGCGACAA -0.778393602379  
GGCGACAC 0.0719761267389  
GGCGACCA -0.672238434282  
GGCGACCC -1.43366601879  
GGCGACGA -0.263241585285  
GGCGACTA -1.18458922484  
GGCGAGAA -0.411543228485  
GGCGAGAC -0.558793072151  
GGCGAGCA -0.964901131773  
GGCGAGCC -1.32260628646  
GGCGAGGA 0.0404438354  
GGCGAGTA 0.5151988044  
GGCGATAA 0.0346539717144  
GGCGATAC 0.641846289456  
GGCGATCA 2.37719371625  
GGCGATGA -1.12457757917  
GGCGATTA 1.38418439201  
GGCGCAAA 0.606794233574  
GGCGCAAC -0.518890558031  
GGCGCACA -0.144967459588  
GGCGCACC -1.38266681048  
GGCGCAGA 0.44245996617  
GGCGCATA 1.18765523093  
GGCGCCAA -0.535604342669  
GGCGCCAC -0.893915641274  
GGCGCCCA 0.120100137511  
GGCGCCCC -1.36959773079  
GGCGCCGA 0.344698022433

GGCGCCTA -0.0763155839602  
GGCGCGAA 0.113126215206  
GGCGCGAC 0.072416293343  
GGCGCGCA -0.277762901114  
GGCGCGCC 0.0206088931497  
GGCGCGGA -0.0610689342086  
GGCGCGTA 0.259928312201  
GGCGCTAA -0.421778408937  
GGCGCTAC -1.2964720478  
GGCGCTCA -1.1230079827  
GGCGCTGA -0.520406048513  
GGCGCTTA -0.636029242084  
GGCGGAAA 0.2108319619  
GGCGGAAC -1.10109819336  
GGCGGACA -0.772359608285  
GGCGGACC -1.54949387415  
GGCGGAGA -1.02688385603  
GGCGGATA 1.33405401613  
GGCGGCAA -1.23690867157  
GGCGGCAC -0.867275890609  
GGCGGCCA -0.979038216658  
GGCGGCCC -1.25436608684  
GGCGGCGA -0.833642352638  
GGCGGCTA -0.233457936809  
GGCGGGAA 0.209184735095  
GGCGGGAC -0.739054365595  
GGCGGGCA -0.0922399961847  
GGCGGGGA 0.614186889193  
GGCGGGTA 0.316798412486  
GGCGGTAA 0.568128054394  
GGCGGTAC -1.46991363408  
GGCGGTCA -0.145772514897  
GGCGGTGA -0.188384510619  
GGCGGTTA -0.413082766073  
GGCGTAAA 0.76169105715  
GGCGTAAC -0.419504389071  
GGCGTACA 0.172143303902  
GGCGTACC -1.41177008267  
GGCGTAGA -0.529435737054  
GGCGTATA -0.30203976217  
GGCGTCAA -0.339594546813  
GGCGTCAC -0.996850326754  
GGCGTCCA -0.804872341983  
GGCGTCCC -1.18353376596  
GGCGTCGA -0.122654358447  
GGCGTCTA -1.28486409122  
GGCGTGAA -0.633302509297  
GGCGTGAC -0.611861638534  
GGCGTGCA -0.93224646787  
GGCGTGGA -0.823053522889  
GGCGTGTA -0.285957214081  
GGCGTTAA -0.00730221758775  
GGCGTTAC -1.19339752317  
GGCGTTCA -1.33140282262

GGCGTTGA -0.925758715328  
GGCGTTTA 0.325991464524  
GGCTAAAA 0.331512105168  
GGCTAAAC 0.5517331553  
GGCTAACA 0.41782004608  
GGCTAACC -1.37942201937  
GGCTAAGA -0.902878938891  
GGCTAATA -1.00115737266  
GGCTACAA -0.33518425518  
GGCTACAC -1.22283823899  
GGCTACCA -1.56754619393  
GGCTACCC -1.63115863242  
GGCTACGA -0.197198559345  
GGCTACTA -1.03924851233  
GGCTAGAA -0.291479684396  
GGCTAGAC -0.41468451248  
GGCTAGCA -0.708201927782  
GGCTAGCC -0.266765531933  
GGCTAGGA -0.152869809316  
GGCTAGTA -0.657373401658  
GGCTATAA 0.283547014404  
GGCTATAC 0.275054465038  
GGCTATCA 0.607589356383  
GGCTATGA 0.122059453939  
GGCTATTA -0.27675710474  
GGCTCAAA -0.231036497724  
GGCTCAAC -0.978521203866  
GGCTCACA -0.76823605226  
GGCTCACC -1.2175128504  
GGCTCAGA -0.677855001971  
GGCTCATA -0.863748546  
GGCTCCAA -0.542315576474  
GGCTCCAC -0.190912593394  
GGCTCCCA -0.826736128164  
GGCTCCCC -1.22806273429  
GGCTCCGA -1.13974973517  
GGCTCCTA -1.26952935587  
GGCTCGAA -1.14483020921  
GGCTCGAC -1.40165827433  
GGCTCGCA -0.854808772727  
GGCTCGGA -0.569097780107  
GGCTCGTA 0.236977962734  
GGCTCTAA -0.771499924223  
GGCTCTAC -0.620306093687  
GGCTCTCA -1.41701235191  
GGCTCTGA -0.640265453576  
GGCTCTTA -0.530582156725  
GGCTGAAA 0.0436873195983  
GGCTGAAC -0.575678845877  
GGCTGACA -0.586870421582  
GGCTGACC -1.15504813848  
GGCTGAGA -0.23594916478  
GGCTGATA 1.18838683801  
GGCTGCAA -0.321803608627



GGCTGCAC -1.98552359172  
GGCTGCCA -1.17273295574  
GGCTGCCC -1.49568089298  
GGCTGCGA -1.09990106566  
GGCTGCTA -1.01317047071  
GGCTGGAA 0.13559875912  
GGCTGGAC -0.635264962304  
GGCTGGCA -1.21753349954  
GGCTGGGA -0.654491146822  
GGCTGGTA -0.485437373359  
GGCTGTAA 0.313864404095  
GGCTGTAC -0.563012816602  
GGCTGTCA -0.598943898784  
GGCTGTGA -1.0957283699  
GGCTGTTA -1.09246109997  
GGCTTAAA -0.161845130486  
GGCTTAAC -0.905731134843  
GGCTTACA -0.616991252314  
GGCTTACC -1.19658716276  
GGCTTAGA -0.54810726983  
GGCTTATA -0.646725499668  
GGCTTCAA -1.19180858446  
GGCTTCAC -1.51121689216  
GGCTTCCA -0.656721254581  
GGCTTCCC -1.83614531774  
GGCTTCGA -0.336781819482  
GGCTTCTA -0.962140157997  
GGCTTGAA -0.622684666191  
GGCTTGAC -1.6458582105  
GGCTTGCA -1.19621547813  
GGCTTGGA -0.288511173635  
GGCTTGTA -0.911143040744  
GGCTTTAA -0.269702415522  
GGCTTTAC 0.499936471753  
GGCTTTCA -0.749468331058  
GGCTTTGA 0.263374367135  
GGCTTTTA 0.211001859936  
GGGAAAAA 0.299982427645  
GGGAAAAC 0.152894901949  
GGGAAACA 0.089960225923  
GGGAAACC 0.116177845314  
GGGAAAGA 0.608080231016  
GGGAAATA 1.86779104869  
GGGAACAA 0.324803746561  
GGGAACAC -1.51961351448  
GGGAACCA -1.0359245226  
GGGAACCC -0.952193804205  
GGGAACGA 0.0838255999151  
GGGAACTA -0.543609676745  
GGGAAGAA -0.521985838866  
GGGAAGAC -0.3933163058  
GGGAAGCA -0.926691324855  
GGGAAGGA -0.522952950763  
GGGAAGTA 0.0998090843798

GGGAATAA 0.713363168734  
GGGAATAC 1.26010654941  
GGGAATCA 14.2962605259  
GGGAATGA -0.175678228578  
GGGAATTA 2.90686365121  
GGGACAAA 0.90910713951  
GGGACAAC -0.224399757674  
GGGACACA -0.931674826324  
GGGACACC -1.02219649991  
GGGACAGA -1.46378292879  
GGGACATA -0.89408867589  
GGGACCAA -0.90277700007  
GGGACCAC -0.849383013602  
GGGACCCA -1.19873781051  
GGGACCCC -1.74330911014  
GGGACCGA -1.26243310697  
GGGACCTA -0.467613762474  
GGGACGAA -0.556307333193  
GGGACGAC -0.845682895759  
GGGACGCA -1.08718537388  
GGGACGGA -0.758810631986  
GGGACGTA -0.448502063094  
GGGACTAA -1.30864092928  
GGGACTAC -0.641192051326  
GGGACTCA -1.23865574614  
GGGACTGA -0.698048037005  
GGGACTTA -0.0957362363842  
GGGAGAAA 0.283360649328  
GGGAGAAC -0.627372545077  
GGGAGACA -0.753626389453  
GGGAGACC -0.791255406469  
GGGAGAGA -0.488460774256  
GGGAGATA 2.28670157878  
GGGAGCAA 0.712080569253  
GGGAGCAC -0.988709858394  
GGGAGCCA -0.557625741952  
GGGAGCCC -1.57558968971  
GGGAGCGA 0.679827126097  
GGGAGCTA -1.0257539034  
GGGAGGAA 0.253407102816  
GGGAGGAC -0.896310419437  
GGGAGGCA -1.10121163297  
GGGAGGGA 1.93895323315  
GGGAGGTA 0.657474033571  
GGGAGTAA -0.300234399501  
GGGAGTAC -0.600011381213  
GGGAGTCA -0.204737588657  
GGGAGTGA 0.227084930788  
GGGAGTTA -0.21580108738  
GGGATAAA 0.140566839074  
GGGATAAC 0.794825094896  
GGGATACA 0.490248362976  
GGGATACC 2.75849065083  
GGGATAGA 0.267870653312

GGGATATA 1.03970749841  
GGGATCAA 1.10515954057  
GGGATCAC 1.01303533643  
GGGATCCA 1.63273894554  
GGGATCCC 3.46492250246  
GGGATCGA 1.73495221782  
GGGATCTA 4.54010261974  
GGGATGAA 1.20584738986  
GGGATGAC -0.682693959418  
GGGATGCA 0.0712693509091  
GGGATGGA -0.758490439533  
GGGATGTA 0.839256045129  
GGGATTAA -0.231058976541  
GGGATTAC 9.28336774265  
GGGATTCA 1.726505933  
GGGATTGA 0.529454556529  
GGGATTTA 3.52263085352  
GGGCAAAA -0.0625789356763  
GGGCAAAC 0.0064059401024  
GGGCAACA -0.652127995832  
GGGCAACC -0.994982493884  
GGGCAAGA -0.503880458622  
GGGCAATA 0.666266387626  
GGGCACAA -0.751335379783  
GGGCACAC -0.753457536943  
GGGCACCA -0.764516330798  
GGGCACCC -1.4076428673  
GGGCACGA -0.699292474773  
GGGCACTA -1.60506595344  
GGGCAGAA 1.54129093559  
GGGCAGAC -1.30440184259  
GGGCAGCA -0.299839190531  
GGGCAGGA -0.734899705161  
GGGCAGTA -0.198789066344  
GGGCATAA -0.0288552210545  
GGGCATAC -0.811025264702  
GGGCATCA -0.537315085201  
GGGCATGA -0.967948841157  
GGGCATTA -0.922467398298  
GGGCCAAA -0.789343661491  
GGGCCAAC -1.1138201583  
GGGCCACA -0.919510649709  
GGGCCACC -1.65033175648  
GGGCCAGA -0.424555849754  
GGGCCATA -0.215239901098  
GGGCCCAA -1.1950031903  
GGGCCCAC -1.17924292571  
GGGCCCCA -0.997214431314  
GGGCCCCC -0.993047747326  
GGGCCCGA -0.051358346615  
GGGCCCTA -1.18068993422  
GGGCCGAA -1.43520241979  
GGGCCGAC -1.25926908278  
GGGCCGCA -1.95626244505

GGGCCGGA -1.0874449258  
GGGCCGTA -1.02886329884  
GGGCCTAA -0.340938309587  
GGGCCTAC -1.26306068418  
GGGCCTCA -1.13081832611  
GGGCCTGA -1.23211284209  
GGGCCTTA -0.211822075377  
GGGCGAAA -0.23095233285  
GGGCGAAC -0.886921069823  
GGGCGACA -0.306887867973  
GGGCGACC -1.34335972363  
GGGCGAGA -0.594945805924  
GGGCGATA 0.559415160344  
GGGCGCAA 0.356913429841  
GGGCGCAC -0.463016321619  
GGGCGCCA -0.604856611819  
GGGCGCCC -0.339857496697  
GGGCGCGA -0.136070552896  
GGGCGCTA -1.25018345858  
GGGCGGAA -0.246530675845  
GGGCGGAC -1.60419293891  
GGGCGGCA -1.2175128504  
GGGCGGGA 0.283281973468  
GGGCGGTA -0.703259463224  
GGGCGTAA -0.0262468941294  
GGGCGTAC -1.09872537125  
GGGCGTCA -1.3082005013  
GGGCGTGA -0.791206266729  
GGGCGTTA -0.105462768255  
GGGCTAAA -0.00199434156118  
GGGCTAAC -0.292429022345  
GGGCTACA -0.784937813345  
GGGCTACC -1.44406613102  
GGGCTAGA -0.571084541602  
GGGCTATA -0.739317315479  
GGGCTCAA -1.05528714831  
GGGCTCAC -0.724553960294  
GGGCTCCA -1.07581004692  
GGGCTCGA -1.08868256765  
GGGCTCTA -1.02693247301  
GGGCTGAA -0.24161016734  
GGGCTGAC -1.21972361592  
GGGCTGCA -0.935861375313  
GGGCTGGA 0.348479691333  
GGGCTGTA -0.388578764411  
GGGCTTAA -0.777737273197  
GGGCTTAC -0.802819450944  
GGGCTTCA -1.15024838827  
GGGCTTGA -0.950426341868  
GGGCTTTA -0.724336229426  
GGGGAAAA 0.532066804178  
GGGGAAAC 0.316848074989  
GGGGAAACA 0.238072106086  
GGGGAAACC -0.692626198604

GGGAAGA -0.611018682894  
GGGAATA 2.57701288745  
GGGACAA -0.247442113462  
GGGACAC -0.971829312299  
GGGACCA -0.71834457915  
GGGACCC -0.645369974723  
GGGACGA -0.551194709217  
GGGACTA -1.49773430678  
GGGAGAA 0.0369753016495  
GGGAGAC -0.941940327041  
GGGAGCA -0.120052043298  
GGGAGGA -0.193964484884  
GGGAGTA -0.580283866798  
GGGATAA 0.508787375284  
GGGATAC 2.16986400632  
GGGATCA 2.86807227025  
GGGATGA -0.950423728052  
GGGATTA 1.70470618531  
GGGCAAA 0.0173583516484  
GGGCAAC -0.461293032771  
GGGCACA 0.123219465453  
GGGCACC -0.885233328871  
GGGCAGA 1.50268748799  
GGGCATA -0.597967899912  
GGGCCAA -0.0495352099978  
GGGCCAC -1.52299422401  
GGGCCCA -1.17187876069  
GGGCCCC -1.54462721025  
GGGCCGA -0.0597831981484  
GGGCCTA -1.00267181761  
GGGCGAA -0.177228482811  
GGGCGAC -1.26387462646  
GGGCGCA 0.140485549398  
GGGCGGA -0.878352197031  
GGGCGTA -0.0537980824121  
GGGCTAA 0.297862100155  
GGGCTAC -0.998773049758  
GGGCTCA -0.739130689021  
GGGCTGA -0.672609596146  
GGGCTTA -0.777737273197  
GGGGAAA 0.202631375774  
GGGGAAC -0.948155981343  
GGGGACA -0.424097386438  
GGGGACC -1.55305728941  
GGGGAGA -0.295403283502  
GGGGATA 1.37439277613  
GGGGCAA -0.0608637496574  
GGGGCAC -1.59175797097  
GGGGCCA -1.30243233228  
GGGGCGA 0.378355868893  
GGGGGCTA -0.961774746528  
GGGGGAA -0.724251803171  
GGGGGAC -1.21582484807  
GGGGGCA -0.625125970278

GGGGGGA -0.139870518508  
GGGGGTA -1.0621931114  
GGGGGTAA -0.472979926596  
GGGGGTAC -1.24163053006  
GGGGGTCA -1.09688655174  
GGGGGTGA 0.705977047655  
GGGGGTTA -1.51147827375  
GGGGTAAA -0.0446549542588  
GGGGTAAC -0.549392744509  
GGGGTACA -1.13102743138  
GGGGTACC -0.400785807608  
GGGGTAGA -0.260717945996  
GGGGTATA -0.316662755439  
GGGGTCAA -1.13436893368  
GGGGTCAC -0.864919012778  
GGGGTCCA -0.681351764934  
GGGGTCGA -0.674140508141  
GGGGTCTA -0.929914159908  
GGGGTGAA 0.234666303918  
GGGGTGAC -0.454545728307  
GGGGTGCA -0.392177727577  
GGGGTGGA 0.0587915163812  
GGGGTGTA -0.492831335887  
GGGGTTAA -0.167735364703  
GGGGTTAC 0.0787161125182  
GGGGTTCA -0.556590932222  
GGGGTTGA -0.400843311558  
GGGGTTTA -0.916951462523  
GGGTAAAA 0.714319302605  
GGGTAAAC -0.803780289683  
GGGTAAACA -0.694249378301  
GGGTAAACC -0.290356789069  
GGGTAAAGA 0.453534965684  
GGGTAAATA 1.63166701962  
GGGTACAA -1.14026857764  
GGGTACAC -0.259881786277  
GGGTACCA -0.379923374312  
GGGTACCC -0.932283322674  
GGGTACGA 0.9876972661  
GGGTACTA -0.349355319673  
GGGTAGAA 1.55616590071  
GGGTAGAC -0.672369125079  
GGGTAGCA -1.1747314794  
GGGTAGGA 0.0344584582822  
GGGTAGTA -0.131685353896  
GGGTATAA 0.909086228982  
GGGTATAC -0.674142860575  
GGGTATCA 2.19303914396  
GGGTATGA -0.398470228068  
GGGTATTA 1.29973435147  
GGGTCAAA -0.360524939323  
GGGTCAAC -1.11545849813  
GGGTCACA -0.0385002018681  
GGGTCACC -0.671038431385

GGGTCAGA -0.488150775685  
GGGTCATA -0.832110395116  
GGGTCCAA -0.987503320957  
GGGTCCAC -1.20063988437  
GGGTCCCA -1.46996198967  
GGGTCCGA -1.30921230945  
GGGTCCCTA -1.19694969903  
GGGTCCGAA -0.654756971903  
GGGTCCGAC -0.0435519239327  
GGGTCCGA 0.0757557045862  
GGGTCCGA -1.15776310909  
GGGTCCGTAA -0.938658158367  
GGGTCCCTAA -0.517816018299  
GGGTCCCTAC -1.2494432259  
GGGTCCCTCA -0.871246538402  
GGGTCCCTGA -0.300280664043  
GGGTCCCTTA -0.688002358208  
GGGTGAAA 0.779854986871  
GGGTGAAC -0.722460032346  
GGGTGACA 0.0604946788469  
GGGTGACC -0.323971246185  
GGGTGAGA -1.00312296224  
GGGTGATA 0.668416512617  
GGGTGCAA -0.18174960024  
GGGTGCAC -0.521908469914  
GGGTGCCA -0.828036240212  
GGGTGCGA -0.111260473389  
GGGTGCTA -0.690827631856  
GGGTGGAA -0.126059899233  
GGGTGGAC -0.504723152881  
GGGTGGCA 0.301066115733  
GGGTGGGA 0.768264804236  
GGGTGGTA -0.407076217046  
GGGTGTAA -0.0792127375466  
GGGTGTAC -1.02140947993  
GGGTGTCA -0.829672750372  
GGGTGTGA -0.720595597437  
GGGTGTTA 0.0037139710672  
GGGTTAAA -0.402028938468  
GGGTTAAC -0.366701647768  
GGGTTACA 0.526877334014  
GGGTTACC -0.388107232016  
GGGTTAGA 0.491308003957  
GGGTTATA 0.307814727105  
GGGTTCAA -0.767001285611  
GGGTTCAC -0.640021584549  
GGGTTCCTA -0.326666351799  
GGGTTCGA -0.956288085492  
GGGTTCCTA -0.649510781933  
GGGTTGAA -0.491024404928  
GGGTTGAC -0.700922450393  
GGGTTGCA 0.0473848236251  
GGGTTGGA 0.434074844639  
GGGTTGTA -0.260992658051

GGGTTTAA -0.459470680299  
GGGTTTAC -0.117982423838  
GGGTTTCA 1.07828872857  
GGGTTTGA -0.60887953593  
GGGTTTTA 0.625066898038  
GGTAAAAA 1.96213412118  
GGTAAAAC -0.225033608039  
GGTAAACA 1.97564702682  
GGTAAACC -0.786506102908  
GGTAAAGA 0.916155294188  
GGTAAATA 0.176537651258  
GGTAACAA -0.0582342508231  
GGTAACAC -0.218063867839  
GGTAACCA -0.212380386462  
GGTAACGA 0.696123222948  
GGTAACTA 0.869123074333  
GGTAAGAA 0.561557705269  
GGTAAGAC -0.164115752392  
GGTAAGCA -0.374938043172  
GGTAAGGA 1.1901749495  
GGTAAGTA 1.26152088521  
GGTAATAA 2.59532528192  
GGTAATAC 1.32592243474  
GGTAATCA 4.55931782623  
GGTAATGA -0.597232894871  
GGTAATTA 1.82977780073  
GGTACAAA -0.477010953536  
GGTACAAC -0.596989287225  
GGTACACA -0.194294348456  
GGTACACC -0.268510776836  
GGTACAGA -0.111061039232  
GGTACATA -0.505579961746  
GGTACCAA 0.582836780825  
GGTACCAC 0.106241424023  
GGTACCCA -1.22851518583  
GGTACCGA -0.629492088422  
GGTACCTA -0.390780120195  
GGTACGAA 1.04637168353  
GGTACGAC -0.469199825985  
GGTACGCA -0.659226074395  
GGTACGGA 0.0675587778026  
GGTACGTA 1.24767576357  
GGTACTAA 0.333240621648  
GGTACTAC -0.177317613934  
GGTACTCA -0.4990553544  
GGTACTGA 0.0767730017495  
GGTACTTA 0.592072699444  
GGTAGAAA 1.50561574598  
GGTAGAAC 0.225105226596  
GGTAGACA -0.0623039622396  
GGTAGACC -1.21718873722  
GGTAGAGA 0.226745396097  
GGTAGATA 3.29766912542  
GGTAGCAA -0.397069484106



GGTAGCAC -0.405669722689  
GGTAGCCA -1.38275045259  
GGTAGCGA -0.79325968053  
GGTAGCTA 0.156572279593  
GGTAGGAA 0.339057407638  
GGTAGGAC -0.039524817716  
GGTAGGCA -0.612898016554  
GGTAGGGA -0.343873363505  
GGTAGGTA -0.269444693271  
GGTAGTAA -0.306382355971  
GGTAGTAC -0.0801929185236  
GGTAGTCA 0.120962174008  
GGTAGTGA -0.192088287804  
GGTAGTTA -0.449380828012  
GGTATAAA 1.22930691068  
GGTATAAC 1.41534369182  
GGTATACA -0.0861304628098  
GGTATACC 0.337879099413  
GGTATAGA 1.73118178833  
GGTATATA 0.98999324202  
GGTATCAA 2.00400117936  
GGTATCAC 1.29259340633  
GGTATCCA 4.19533716085  
GGTATCGA 1.89644003967  
GGTATCTA 6.15200187218  
GGTATGAA 0.324834066826  
GGTATGAC -0.465336606028  
GGTATGCA 0.437808942089  
GGTATGGA -0.388207079785  
GGTATGTA -0.126916446716  
GGTATTAA 1.68417570663  
GGTATTAC 1.41566675947  
GGTATTCA 0.0842560954002  
GGTATTGA 1.0451891932  
GGTATTTA 0.758334394722  
GGTCAAAA 0.186944298036  
GGTCAAAC 0.0740933176492  
GGTCAACA -1.42295303278  
GGTCAACC -0.85614913754  
GGTCAAGA 0.308794123937  
GGTCAATA -0.131614780866  
GGTCACAA 0.264415450023  
GGTCACAC -1.03472504247  
GGTCACCA -0.976078070108  
GGTCACGA -0.420050153839  
GGTCACTA -0.832345115787  
GGTCAGAA 1.05933777887  
GGTCAGAC -0.980713149912  
GGTCAGCA -0.356860630759  
GGTCAGGA -0.125096969441  
GGTCAGTA 0.513283661462  
GGTCATAA 0.369990873745  
GGTCATAC -0.194787836905  
GGTCATCA -0.791013367113

GGTCATGA -0.671506565819  
GGTCATTA -0.521032318812  
GGTCCAAA -0.110475544462  
GGTCCAAC -0.779365157764  
GGTCCACA 0.195722276103  
GGTCCACC -0.558793072151  
GGTCCAGA -1.13317520394  
GGTCCATA -0.486265953012  
GGTCCCAA -0.516601900796  
GGTCCCAC -1.44361577054  
GGTCCCCA -1.68908628264  
GGTCCCGA 0.30794672481  
GGTCCCTA -0.725963329848  
GGTCCGAA -0.022811033078  
GGTCCGAC -1.55110189371  
GGTCCGCA -0.594698538936  
GGTCCGGA -0.545373218359  
GGTCCGTA -0.872850898625  
GGTCCTAA -0.341177735127  
GGTCCTAC -1.26895483912  
GGTCCTCA -1.26128799421  
GGTCCTGA -0.867680247935  
GGTCCTTA -0.394157170387  
GGTCGAAA -0.553547404943  
GGTCGAAC -0.489607193926  
GGTCGACA -0.390299178062  
GGTCGACC -1.16660381874  
GGTCGAGA 0.30903407224  
GGTCGATA 1.05824572657  
GGTCGCAA -0.321142835958  
GGTCGCAC -0.0175005432355  
GGTCGCCA -0.476179498686  
GGTCGCGA 0.0266112600712  
GGTCGCTA -0.434969292453  
GGTCGGAA -0.676480918932  
GGTCGGAC -1.41331406374  
GGTCGGCA -0.352014093246  
GGTCGGGA -1.044487645  
GGTCGGTA -0.52513182773  
GGTCGTAA 0.307921893558  
GGTCGTAC -0.394790236608  
GGTCGTCA -0.337093386341  
GGTCGTGA -0.289275192034  
GGTCGTTA -0.645133162999  
GGTCTAAA 0.194084197654  
GGTCTAAC 0.375422383266  
GGTCTACA 0.541618994526  
GGTCTAGA -0.34809049414  
GGTCTATA -0.718184352233  
GGTCTCAA -0.495747831711  
GGTCTCAC -0.540896797182  
GGTCTCCA -0.725347514813  
GGTCTCGA -0.435049797984  
GGTCTCTA -0.419808114483

GGTCTGAA -0.173708456886  
GGTCTGAC -1.15910478082  
GGTCTGCA -0.579158880418  
GGTCTGGA -0.652920766206  
GGTCTGTA -0.834549085387  
GGTCTTAA -0.499435403237  
GGTCTTAC -0.976061341686  
GGTCTTCA -0.87633825185  
GGTCTTGA -0.374577859336  
GGTCTTTA -0.216187670758  
GGTGAAAA 0.742760233833  
GGTGAAAC -0.439712584237  
GGTGAAACA -0.573836628404  
GGTGAAACC -1.51132249032  
GGTGGAAGA 0.614197605839  
GGTGGAATA 0.813865698483  
GGTGACAA 0.458601325117  
GGTGACAC 0.140482674201  
GGTGACCA -1.25674309106  
GGTGACGA -0.751091249374  
GGTGACTA -0.879405564854  
GGTGAGAA -0.017259549406  
GGTGAGAC -0.685133433834  
GGTGAGCA -0.0535069033165  
GGTGAGGA -0.47468125939  
GGTGAGTA 1.07370383403  
GGTGATAA -0.219629543586  
GGTGATAC 1.17283384903  
GGTGATCA 0.21547462177  
GGTGATGA 1.52417017981  
GGTGATTA 0.821675519126  
GGTGCAAA 1.24255372985  
GGTGCAAC -0.659931543317  
GGTGCAACA -1.41556665032  
GGTGCAACC -0.246943397381  
GGTGCAAGA -0.00515575193895  
GGTGCAATA 0.414417380491  
GGTGCCAA -0.648919014004  
GGTGCCAC -0.851976964539  
GGTGCCCA -0.250911692739  
GGTGCCGA -0.346273107918  
GGTGCCTA -0.947494424529  
GGTGCGAA -0.2241153745  
GGTGCGAC -0.959804190692  
GGTGCGCA 0.384627720238  
GGTGCGGA 1.11455986821  
GGTGCGTA -0.234316052582  
GGTGCTAA 0.29592944465  
GGTGCTAC -0.129094800919  
GGTGCTCA -0.904450626415  
GGTGCTGA -0.0786343000794  
GGTGCTTA -0.803931106863  
GGTGGAAA 0.103761174079  
GGTGGAAC -0.631580527357

GGTGGACA -0.443480399912  
GGTGGAGA -0.58995969064  
GGTGGATA 2.51533336584  
GGTGGCAA 0.481160124957  
GGTGGCAC -0.522841340823  
GGTGGCCA -1.16478878496  
GGTGGCGA -0.914543876662  
GGTGGCTA -0.0992774342179  
GGTGGGAA 0.613518275076  
GGTGGGAC -0.682969717  
GGTGGGCA -1.00025874274  
GGTGGGGA -0.120052043298  
GGTGGGTA -0.458847023816  
GGTGGTAA 0.763482305213  
GGTGGTAC -0.407076217046  
GGTGGTCA -1.34164401485  
GGTGGTGA 0.104731422555  
GGTGGTTA -1.09370919708  
GGTGTAAC -0.117982423838  
GGTGTAAC 0.865054408443  
GGTGTAACA -0.885975129834  
GGTGTAGA 1.40501964162  
GGTGTTAA 1.30351837281  
GGTGTTAC -0.815113795593  
GGTGTTCA -1.04953230976  
GGTGTTGA -0.47002213248  
GGTGTTTA -0.950592841943  
GGTGTTTA -1.18434823101  
GGTGTTTA 0.411916742782  
GGTGTTTA -0.506313398498  
GGTGTTTA -0.922410939874  
GGTGTTTA -0.156051607458  
GGTGTTTA 0.357035756427  
GGTGTTTA 0.562080207075  
GGTGTTTA -0.220831898918  
GGTGTTTA -0.762415084165  
GGTGTTTA 0.750996106474  
GGTGTTTA 0.303811145232  
GGTTAAAA 2.49935641592  
GGTTAAAC -0.415526683975  
GGTTAAACA 0.666241556374  
GGTTAAACC -0.383729874463  
GGTTAAGA 1.31526878236  
GGTTAATA 0.166456163183  
GGTTACAA 0.592286248207  
GGTTACAC -0.69177618566  
GGTTACCA -0.763472634094  
GGTTACGA 0.71980413397  
GGTTACTA -0.470884953121  
GGTTAGAA 0.679485500354  
GGTTAGAC 0.621895293778  
GGTTAGCA -0.409363305992  
GGTTAGGA 0.496950709806  
GGTTAGTA -0.490023052042

GGTTATAA 0.0935009009935  
GGTTATAC -0.24344036126  
GGTTATCA 0.354126579287  
GGTTATGA -0.280488588374  
GGTTATTA 0.582101514402  
GGTTCAAA 0.0626651916023  
GGTTC AAC -0.718300144279  
GGTTCACA -0.0180494445826  
GGTTCAGA -0.46820030277  
GGTTCATA 0.0820346132339  
GGTTCCAA 0.206534848496  
GGTTCAC -0.446267250466  
GGTTC CCA -0.989331423825  
GGTTC CGA -0.588062060268  
GGTTCCTA -0.671410900156  
GGTTCGAA -0.281596846332  
GGTTCGAC -0.966415053964  
GGTTCGCA -0.322043818312  
GGTTCGGA -0.530293330064  
GGTTCGTA 0.0289189981634  
GGTTCTAA 0.0537468516197  
GGTTCTAC -0.662971411253  
GGTTCTCA 0.176288031836  
GGTTCTGA 1.0076777979  
GGTTCTTA -0.263289156735  
GGTTGAAA 0.239279689049  
GGTTGAAC -1.41006378362  
GGTTGACA -0.337438932809  
GGTTGAGA 0.582856907208  
GGTTGATA 0.295918989387  
GGTTGCAA 1.65161278767  
GGTTGCAC -0.0790318614836  
GGTTGCCA -0.285516524714  
GGTTGCGA 0.481794236704  
GGTTGCTA 0.684921714743  
GGTTGGAA 0.805305189902  
GGTTGGAC -0.221705436204  
GGTTGGCA -0.172903662959  
GGTTGGGA 0.50760932844  
GGTTGGTA -0.031756818128  
GGTTGTAA 0.661042415091  
GGTTGTAC -0.0383865008747  
GGTTGTCA 0.236807541934  
GGTTGTGA -0.189212306126  
GGTTGTTA -0.416009717161  
GGTTTAAA -0.027649467762  
GGTTTAAC -0.31337980262  
GGTTTACA 1.31329874929  
GGTTTAGA 0.687250101981  
GGTTTATA 0.653480122817  
GGTTTCAA 0.261461838012  
GGTTTCAC 0.169094026228  
GGTTTCCA -0.792375426598  
GGTTTCGA -0.0401769647927

GGTTTCTA 0.663198290477  
GGTTTGAA 0.733300833951  
GGTTTGAC 0.694313678174  
GGTTTGCA -0.463836798442  
GGTTTGGA -0.388578764411  
GGTTTGTA 0.421993264607  
GGTTTTAA 0.272262386852  
GGTTTTAC -0.250712519965  
GGTTTTCA 0.379709564168  
GGTTTTGA -0.734281537691  
GGTTTTTA 1.63635698956  
GTAAAAAA 1.56505967082  
GTAAAAAC 0.976470926643  
GTAAAACA 1.09340625582  
GTAAAAGA 1.50643517728  
GTAAAATA 1.60947127882  
GTAAACAA 0.525018910881  
GTAAACAC -0.0947225985632  
GTAAACCA 0.0462316080329  
GTAAACGA -0.656624543391  
GTAAACTA -0.0350674773959  
GTAAAGAA -0.141898055532  
GTAAAGAC -0.277338417405  
GTAAAGCA 1.60668808761  
GTAAAGGA 0.442863539351  
GTAAAGTA 1.13161449444  
GTAAATAA 2.33864176082  
GTAAATAC 0.779519895667  
GTAAATCA 2.78941261615  
GTAAATGA 0.808627872723  
GTAAATTA 3.13792315051  
GTAACAAA 1.4940532698  
GTAACAAC -0.0124208533404  
GTAACACA 0.388026987866  
GTAACAGA -0.252483118882  
GTAACATA 1.13139990016  
GTAACCAA -0.212380386462  
GTAACCAC 1.16780565131  
GTAACCCA 0.627886421291  
GTAACCGA 0.663674004978  
GTAACCTA 0.0314504789  
GTAACGAA 1.13433965894  
GTAACGAC 0.0660592315986  
GTAACGCA 0.746516287337  
GTAACGGA 0.240356058453  
GTAACGTA 0.72380379512  
GTAACATA 0.0220781190888  
GTAACACT 0.55438983782  
GTAACACTA 1.09571896016  
GTAACACTGA 0.446179687632  
GTAACACTTA 1.18842264729  
GTAAGAAA 2.23834127905  
GTAAGAAC 0.263521002209  
GTAAGACA 0.568128054394

GTAAGAGA 0.773130161224  
GTAAGATA 2.03341549564  
GTAAGCAA 0.00748962819055  
GTAAGCAC -0.536220680468  
GTAAGCCA -0.256752003073  
GTAAGCGA 2.61485048698  
GTAAGCTA 0.160739224962  
GTAAGGAA 0.112361674043  
GTAAGGAC -0.124500235262  
GTAAGGCA 0.201007150549  
GTAAGGGA 1.96972046056  
GTAAGGTA 0.660978115219  
GTAAGTAA 0.920321978176  
GTAAGTAC 0.656654863656  
GTAAGTCA 0.522728162593  
GTAAGTGA 0.576913089764  
GTAAGTTA 1.41336268072  
GTAATAAA 2.20138662654  
GTAATAAC 0.609509726953  
GTAATACA 1.29474326994  
GTAATAGA 1.21593201452  
GTAATATA 3.88984977546  
GTAATCAA 7.67841967231  
GTAATCAC 7.67119064157  
GTAATCCA 16.4977574555  
GTAATCGA 10.6703954436  
GTAATCTA 13.4270112043  
GTAATGAA -0.839991050171  
GTAATGAC -0.14109744371  
GTAATGCA 0.738424958717  
GTAATGGA 1.7320270964  
GTAATGTA 0.60073410132  
GTAATTAA 1.03375165741  
GTAATTAC 3.84061489291  
GTAATTCA 1.66431305793  
GTAATTGA 1.56804438724  
GTAATTTA 3.12146395155  
GTACAAAA 1.96538387854  
GTACAAAC 0.741058639657  
GTACAACA 0.0461443065806  
GTACAAGA 0.556079931206  
GTACAATA 1.204118612  
GTACACAA 0.762149781847  
GTACACAC 0.283535252233  
GTACACCA -0.188503700625  
GTACACGA -0.287692265101  
GTACACTA 0.265741438849  
GTACAGAA 0.284126497398  
GTACAGAC -0.805398764513  
GTACAGCA 0.207765955804  
GTACAGGA -0.0857660968679  
GTACAGTA 0.742639214155  
GTACATAA 0.656946042752  
GTACATAC -0.378343061195

GTACATCA 0.835121511077  
GTACATGA -0.027649467762  
GTACATTA 1.10305646426  
GTACCAAA 1.5825866136  
GTACCAAC -1.33159101737  
GTACCACA -0.522720321145  
GTACCAGA -1.03968554236  
GTACCATA 1.31972664544  
GTACCCAA -0.398489308924  
GTACCCAC -0.405348223329  
GTACCCCA -0.483571631542  
GTACCCGA 0.266931247864  
GTACCCTA -0.834379710114  
GTACCGAA -0.733021155646  
GTACCGAC -0.629492088422  
GTACCGCA 0.241540901218  
GTACCGGA 0.656688059119  
GTACCGTA -0.0255746206699  
GTACCTAA 0.802828337919  
GTACCTAC 0.40291815865  
GTACCTCA 0.529970001032  
GTACCTGA 0.710339245075  
GTACCTTA -0.595781181498  
GTACGAAA 1.70005071774  
GTACGAAC 0.363403534817  
GTACGACA 0.427906239024  
GTACGAGA 0.719498578887  
GTACGATA 1.9160096796  
GTACGCAA 0.957141757777  
GTACGCAC -0.479747096061  
GTACGCCA -0.111618827554  
GTACGCGA 1.03772570317  
GTACGCTA -0.163949252316  
GTACGGAA -0.0766274122017  
GTACGGAC -1.03257491748  
GTACGGCA 0.301401206936  
GTACGGGA 1.0977391785  
GTACGGTA 0.304603131461  
GTACGTAA 0.560329211778  
GTACGTAC -0.625566136882  
GTACGTCA -0.488759010654  
GTACGTGA 0.442175060233  
GTACGTTA -0.271179744291  
GTACTAAA 0.422777409389  
GTACTAAC -0.146217909133  
GTACTACA 1.36635503073  
GTACTAGA -0.42326462468  
GTACTATA 1.31579180693  
GTACTCAA -0.0709021097697  
GTACTCAC -0.824063762749  
GTACTCCA -0.417801226605  
GTACTCGA -0.0394087642883  
GTACTCTA 0.797211247466  
GTACTGAA 0.28239667401



GTACTGAC 0.592677013689  
GTACTGCA 0.618665662804  
GTACTGGA 0.902617034534  
GTACTGTA -0.130791428845  
GTACTTAA 2.09465485065  
GTACTTCA -0.102073694509  
GTACTTGA 0.0014438719245  
GTACTTTA 1.73781905114  
GTAGAAAA 1.00383548847  
GTAGAAAC 1.80747959834  
GTAGAACA -0.279586821876  
GTAGAAGA 0.490345074166  
GTAGAATA 1.29072348241  
GTAGACAA -0.554120614779  
GTAGACAC -0.631310258789  
GTAGACCA -1.27912049207  
GTAGACGA 0.762398094361  
GTAGACTA 0.521388320542  
GTAGAGAA 0.273791469177  
GTAGAGAC -0.798310879832  
GTAGAGCA -0.780121334715  
GTAGAGGA -0.969146230238  
GTAGAGTA 0.642726884046  
GTAGATAA 1.92975050999  
GTAGATAC 5.07735000711  
GTAGATCA 1.54733956705  
GTAGATGA -0.221997138063  
GTAGATTA 3.97071000119  
GTAGCAA 0.536427171927  
GTAGCAAC -0.287478977721  
GTAGCACA 0.423844369055  
GTAGCAGA -0.12521485254  
GTAGCATA 1.00908716745  
GTAGCCAA 0.293360586346  
GTAGCCAC -0.992716838228  
GTAGCCCA -1.39482575946  
GTAGCCGA -0.897596155498  
GTAGCCTA -0.746655342345  
GTAGCGAA -0.873944519214  
GTAGCGAC -0.450114526146  
GTAGCGCA -0.17186911461  
GTAGCGGA -0.494245933073  
GTAGCGTA 0.505693401357  
GTAGCTAA 0.592656625925  
GTAGCTAC 0.830043389472  
GTAGCTCA -0.183779489698  
GTAGCTGA 0.332955715711  
GTAGCTTA -0.183738714169  
GTAGGAAA 0.14741451407  
GTAGGAAC -0.158020856386  
GTAGGACA -0.767055130219  
GTAGGAGA -0.704030800307  
GTAGGATA 4.8606489829  
GTAGGCAA -0.659952453844

GTAGGCAC -0.719547718627  
GTAGGCCA -0.697851739428  
GTAGGCGA -0.342083683731  
GTAGGCTA -0.607413185188  
GTAGGGAA -0.380300547952  
GTAGGGAC -1.23568148499  
GTAGGGCA -0.358673834876  
GTAGGGGA 0.0819561987558  
GTAGGGTA 0.122026519858  
GTAGGTAA 0.819257216619  
GTAGGTCA -1.03472504247  
GTAGGTGA -0.443748838809  
GTAGGTTA -0.456623189215  
GTAGTAAA 0.194640417686  
GTAGTAAC 0.370483316668  
GTAGTACA -0.467835936829  
GTAGTAGA -0.639049506402  
GTAGTATA 1.83617982011  
GTAGTCAA 0.466764272294  
GTAGTCAC -0.895338079908  
GTAGTCCA 0.225177106534  
GTAGTCGA 0.111734880981  
GTAGTCTA 0.495579240583  
GTAGTGAA 0.893614268297  
GTAGTGAC 0.415894186496  
GTAGTGCA 0.171503180379  
GTAGTGGA -0.568108189393  
GTAGTGTA 0.584059785303  
GTAGTTAA 1.87206594466  
GTAGTTCA -0.952119049069  
GTAGTTGA -0.581782628857  
GTAGTTTA -0.0212346406854  
GTATAAAA 0.82631713347  
GTATAAAC -0.220597962391  
GTATAACA 0.815929828929  
GTATAAGA 1.28959849603  
GTATAATA 3.98629200353  
GTATACAA 0.67782206789  
GTATACAC 0.805305189902  
GTATACCA 0.719339397496  
GTATACGA 1.8709278892  
GTATACTA 2.6070482464  
GTATAGAA 0.5674960337  
GTATAGAC -0.232613935643  
GTATAGCA 0.545217957692  
GTATAGGA -0.535611138591  
GTATAGTA 0.00705233678402  
GTATATAA 0.715840543481  
GTATATAC 0.948904055465  
GTATATCA 0.735493825524  
GTATATGA 1.68085720592  
GTATATTA 2.85341503599  
GTATCAAA 2.18104355847  
GTATCAAC 1.23840455843

GTATCACA 1.67854763815  
GTATCAGA 3.01181228187  
GTATCATA 2.38902463133  
GTATCCAA 5.0266817079  
GTATCCAC 4.47407057183  
GTATCCCA 1.75930801612  
GTATCCGA 4.18810630044  
GTATCCTA 3.34149759108  
GTATCGAA 2.34435817628  
GTATCGAC 0.386400932971  
GTATCGCA 2.63621425017  
GTATCGGA 0.648675929122  
GTATCGTA 1.5696469178  
GTATCTAA 4.58371884354  
GTATCTCA 3.13590815981  
GTATCTGA 3.78684791491  
GTATCTTA 1.7907388914  
GTATGAAA 0.999230467547  
GTATGAAC 0.356024732422  
GTATGACA -0.327634770604  
GTATGAGA 2.04041921545  
GTATGATA 1.65843118793  
GTATGCAA -0.199986978189  
GTATGCAC -0.00372573323892  
GTATGCCA 0.218781098932  
GTATGCCG -0.181450579697  
GTATGCTA 0.134449725633  
GTATGGAA 1.10900969144  
GTATGGAC -0.459718992813  
GTATGGCA -0.217345068455  
GTATGGGA -0.484442816395  
GTATGGTA -0.261763472372  
GTATGTAA 1.7025704363  
GTATGTCA -0.145345155991  
GTATGTGA 1.44380004456  
GTATGTTA 0.388486496708  
GTATTTAA 0.563959017972  
GTATTTAA 0.96955476967  
GTATTTACA 1.41566675947  
GTATTTAGA 1.29809757993  
GTATTTATA 0.963251291152  
GTATTTCAA 1.09844124946  
GTATTTCAC 1.08438127214  
GTATTTCCA 0.228429739088  
GTATTTCGA 1.49262142143  
GTATTTCTA 1.03890218172  
GTATTTGAA 1.55551898127  
GTATTTGAC 1.44959226068  
GTATTTGCA 0.615033504176  
GTATTTGGA 0.461576893182  
GTATTTGTA 1.26687842374  
GTATTTTAA 1.98090811554  
GTATTTTCA 1.06301071303  
GTATTTTGA 1.55091134653

GTATTTTA 1.51482082157  
GTCAAAAA 0.527683957612  
GTCAAAAC -0.650548205479  
GTCAAACA 0.263636271492  
GTCAAAGA 0.622988914367  
GTCAAATA 1.48015744012  
GTCAACAA 0.149441005567  
GTCAACAC 0.643692166272  
GTCAACCA 0.717657145558  
GTCAACGA -0.570103315099  
GTCAACTA -0.775576170179  
GTCAAGAA 1.22838527918  
GTCAAGAC -0.010604251263  
GTCAAGCA 0.700031923303  
GTCAAGGA -0.234658985233  
GTCAAGTA 0.292663481635  
GTCAATAA 0.972592546554  
GTCAATCA 1.28639003696  
GTCAATGA -0.158970717098  
GTCAATTA -0.414850751173  
GTCACAAA 1.08527571996  
GTCACAAC -0.683846390866  
GTCACACA 0.609288336743  
GTCACAGA 0.839894338981  
GTCACATA 0.30095738099  
GTCACCAA -0.976470926643  
GTCACCAC -0.678849558936  
GTCACCCA -0.738657588336  
GTCACCGA -0.431716137136  
GTCACCTA -0.38141534045  
GTCACGAA 0.321342531495  
GTCACGAC -0.621623979683  
GTCACGCA 0.266931247864  
GTCACGGA 1.3868614623  
GTCACGTA 0.35482394538  
GTCACTAA -0.0792995162357  
GTCACTCA -0.250331948364  
GTCACTGA -0.426791185144  
GTCACTTA 0.0829024001256  
GTCAGAAA 0.485218335584  
GTCAGAAC -0.461674127135  
GTCAGACA -0.735373067227  
GTCAGAGA -1.05159983817  
GTCAGATA 3.27299653263  
GTCAGCAA -0.357238327162  
GTCAGCAC -0.603880874329  
GTCAGCCA -0.892503919286  
GTCAGCGA -0.302921140905  
GTCAGCTA -0.305128508465  
GTCAGGAA 0.653080208978  
GTCAGGAC 0.100993143  
GTCAGGCA -0.170943039623  
GTCAGGGA -0.265144181907  
GTCAGGTA -0.650459597118

GTCAGTAA 0.558782616887  
GTCAGTCA -0.116662969552  
GTCAGTGA -0.517519088808  
GTCAGTTA 0.24129363423  
GTCATAAA 0.782269630035  
GTCATAAC -0.68440627024  
GTCATACA -0.215547808616  
GTCATAGA -0.195854012426  
GTCATATA 0.686613899182  
GTCATCAA 0.0198291918552  
GTCATCAC -0.681245121244  
GTCATCCA -0.0734199986634  
GTCATCGA -0.406581160307  
GTCATCTA -0.221273111048  
GTCATGAA -0.234869658798  
GTCATGAC -0.64543349045  
GTCATGCA -0.261260835567  
GTCATGGA 0.777810460044  
GTCATGTA 0.0144381964818  
GTCATTAA 0.514639186407  
GTCATTCA -0.195747630118  
GTCATTGA 0.460863844194  
GTCATTTA 0.473541897023  
GTCCAAAA -0.486502241973  
GTCCAAAC 0.0770511117653  
GTCCAACA 0.242539117525  
GTCCAAGA -0.233510474509  
GTCCAATA 0.388936857195  
GTCCACAA -0.335310763871  
GTCCACAC -0.766238051357  
GTCCACCA -0.558793072151  
GTCCACGA -0.334898303716  
GTCCACTA -0.593300931554  
GTCCAGAA -0.215805008104  
GTCCAGAC -1.4369050595  
GTCCAGCA -0.297516292307  
GTCCAGGA -0.655368604833  
GTCCAGTA 0.322874227635  
GTCCATAA 0.349384071648  
GTCCATCA -0.866085558831  
GTCCATGA -0.298147528856  
GTCCATTA -0.607348362553  
GTCCCAAA 0.620851335692  
GTCCCAAC 0.70696507008  
GTCCACA 0.115078997093  
GTCCAGA -0.348023841834  
GTCCATA -0.303953859582  
GTCCCAA -0.464490252427  
GTCCCCAC -0.709162243758  
GTCCCCCA -0.660868857712  
GTCCCCGA -1.10449772237  
GTCCCCTA -1.30480018814  
GTCCCGAA -0.313684050795  
GTCCCGAC -0.352385777872

GTCCCGCA -0.730031472975  
GTCCCGGA -0.598344550789  
GTCCCGTA 0.0112482955103  
GTCCCTAA -0.065276393725  
GTCCCTCA -1.24601416077  
GTCCCTGA -0.46341492855  
GTCCCTTA -0.406936116511  
GTCCGAAA 0.216706774603  
GTCCGAAC -0.679422768771  
GTCCGACA 0.539333212488  
GTCCGAGA -0.320983393185  
GTCCGATA 0.118705405327  
GTCCGCAA -0.389149621812  
GTCCGCAC -0.432278630326  
GTCCGCCA -1.19484531582  
GTCCGCGA 0.398443828527  
GTCCGCTA -1.12504336117  
GTCCGGAA -0.71679484768  
GTCCGGAC 0.0313668367899  
GTCCGGCA -0.0792297273502  
GTCCGGGA -0.27824122943  
GTCCGGTA 0.464648649673  
GTCCGTAA 0.366742684678  
GTCCGTCA -0.510810730202  
GTCCGTGA -0.468305378171  
GTCCGTTA -0.608029522987  
GTCCTAAA 0.353819194533  
GTCCTAAC -0.0835976751652  
GTCCTACA -0.187670416104  
GTCCTAGA -0.184583499481  
GTCCTATA -0.356706938382  
GTCCTCAA 0.629588015467  
GTCCTCAC -1.01077412426  
GTCCTCCA -1.88102793537  
GTCCTCGA -0.514465367647  
GTCCTCTA 0.269892178559  
GTCCTGAA 0.619343425277  
GTCCTGCA 0.971062418703  
GTCCTGGA -0.016789062537  
GTCCTGTA -0.409600117716  
GTCCTTAA -0.130645577916  
GTCCTTCA -0.465607658741  
GTCCTTGA -0.855488364871  
GTCCTTTA -0.544754266744  
GTCGAAAA 1.04999234137  
GTCGAAAC -0.370253300865  
GTCGAACA 0.441478216903  
GTCGAAGA 0.0288643694103  
GTCGAATA 0.436802622952  
GTCGACAA -0.639450465766  
GTCGACAC -0.175310203294  
GTCGACCA -1.10051949451  
GTCGACGA -0.829634065896  
GTCGACTA 0.0421459523393

GTCGAGAA 1.67036351907  
GTCGAGAC -0.861015540055  
GTCGAGCA -0.551568223515  
GTCGAGGA -0.400112488622  
GTCGAGTA 0.0819561987558  
GTCGATAA 0.358626002044  
GTCGATCA -0.0817044882809  
GTCGATGA -0.338645731627  
GTCGATTA 0.705261384851  
GTCGCAA 0.660191618003  
GTCGCAAC -0.480489419788  
GTCGCACA 1.12606849979  
GTCGCAGA -0.194479929387  
GTCGCATA -0.478727969226  
GTCGCCAA -0.702403961267  
GTCGCCAC -1.05125167788  
GTCGCCCA -0.35278882829  
GTCGCCGA -1.32992706214  
GTCGCCTA -0.884459900735  
GTCGCGAA -0.369580504643  
GTCGCGAC 0.0583884659635  
GTCGCGCA 0.239945166587  
GTCGCGGA -0.24621675655  
GTCGCGTA 1.03122305187  
GTCGCTAA 0.681663854557  
GTCGCTCA -1.02284603317  
GTCGCTGA 0.627694828583  
GTCGCTTA 0.306861991195  
GTCGGAAA -0.432038682023  
GTCGGAAC -0.882164447577  
GTCGGACA -0.0487021868581  
GTCGGAGA -0.723599656095  
GTCGGATA 1.01467994942  
GTCGGCAA -0.829643475633  
GTCGGCAC -0.653048843187  
GTCGGCCA -0.777900898075  
GTCGGCGA 0.0244990354112  
GTCGGCTA 0.0892623370674  
GTCGGGAA -0.44809639886  
GTCGGGCA -0.620576362255  
GTCGGGGA -0.331844843937  
GTCGGGTA -0.42812370851  
GTCGGTAA -0.4974023772  
GTCGGTCA -1.11393150686  
GTCGGTGA -0.188195270345  
GTCGGTTA 0.0496651166499  
GTCGTAAA 0.728427112752  
GTCGTAAAC 0.350847285811  
GTCGTACA 0.252285514397  
GTCGTAGA -0.0390953677573  
GTCGTATA 0.457416220971  
GTCGTCAA -0.85447629534  
GTCGTACAC -1.16419989222  
GTCGTCCA -0.767087018774

GTGTCGA -0.93649235048  
GTGTCCTA -0.571997286128  
GTGTCGAA -0.417754700681  
GTGTCGCA 0.114665752793  
GTGTCGGA 2.07174292428  
GTGTCGTA 0.369113154353  
GTGTCGTTAA 0.905198439155  
GTGTCGTTCA 1.05545652358  
GTGTCGTTGA 0.779764287458  
GTGTCGTTTA 1.07054163951  
GTCTAAAA 0.807320441991  
GTCTAAAC 0.128119586193  
GTCTAACA 0.427359690111  
GTCTAAGA 0.276652552103  
GTCTAATA 1.29336944828  
GTCTACAA 0.20605495189  
GTCTACAC -0.522628837587  
GTCTACCA -0.382644879467  
GTCTACGA -0.50604312993  
GTCTACTA -0.711381112108  
GTCTAGAA -1.14455236058  
GTCTAGAC -0.317129582965  
GTCTAGCA 0.0427256967145  
GTCTAGGA -0.709184722575  
GTCTAGTA -0.591945929371  
GTCTATAA 0.623252648395  
GTCTATCA -0.189219102048  
GTCTATGA 0.0507393950007  
GTCTATTA -0.701004785595  
GTCTCAA 0.348987294389  
GTCTCAAC 0.221264224074  
GTCTCACA -1.11747427298  
GTCTCAGA -0.412301235107  
GTCTCATA 0.966526402523  
GTCTCCAA -0.266229699666  
GTCTCCAC -0.749818321012  
GTCTCCCA -0.865843780857  
GTCTCCGA -0.577880201661  
GTCTCCTA -1.62469283594  
GTCTCGAA 0.192509634933  
GTCTCGCA -0.827788973225  
GTCTCGGA -0.278667281428  
GTCTCGTA 0.222230290445  
GTCTCTAA -0.135002809086  
GTCTCTCA -0.298302266759  
GTCTCTGA 0.445174152641  
GTCTCTTA -0.620525654226  
GTCTGAAA 0.286841206632  
GTCTGAAC 0.119778899533  
GTCTGACA -0.373014536023  
GTCTGAGA -0.518522271366  
GTCTGATA 2.04245851464  
GTCTGCAA -0.861556861336  
GTCTGCAC -0.414583096421



GTCTGCCA -0.665037371371  
GTCTGCGA -0.148448016892  
GTCTGCTA -0.322017941534  
GTCTGGAA -0.0910995882907  
GTCTGGCA -0.608763482502  
GTCTGGGA -1.02102498761  
GTCTGGTA -0.66248210491  
GTCTGTAA 0.481026297581  
GTCTGTCA -0.19519533081  
GTCTGTGA 0.326788678385  
GTCTGTTA -0.119410612867  
GTCTTAAA -0.233519884247  
GTCTTAAC -0.706131785559  
GTCTTACA 0.112771520383  
GTCTTAGA -0.192910071535  
GTCTTATA -0.509266487745  
GTCTTCAA 0.305217378207  
GTCTTCAC -0.402220269795  
GTCTTCCA -0.774196598127  
GTCTTCGA 0.0723195821532  
GTCTTCTA -0.324762971033  
GTCTTGAA -0.482791146103  
GTCTTGCA -0.900826047853  
GTCTTGGA -0.910751229735  
GTCTTGTA 0.362321415018  
GTCTTTAA -0.0352358071423  
GTCTTTCA 0.820201588318  
GTCTTTGA -0.32060700369  
GTCTTTTA 0.844327893576  
GTGAAAAA -0.338275353909  
GTGAAAAC 0.643291468288  
GTGAAACA 0.601730749338  
GTGAAAGA 0.701204219751  
GTGAAATA 0.827022079628  
GTGAACAA -0.181745940898  
GTGAACAC -0.0787422506776  
GTGAACCA -0.767097996801  
GTGAACGA 1.87878136057  
GTGAACTA -0.312661526  
GTGAAGAA 0.481300225492  
GTGAAGCA -0.617327389044  
GTGAAGGA -1.0355695664  
GTGAAGTA -0.308356048386  
GTGAATAA 0.10016011986  
GTGAATCA 1.24757068817  
GTGAATGA 0.167690407069  
GTGAATTA 1.74806102752  
GTGACAAA -0.0783886013811  
GTGACAAC 0.37923750901  
GTGACACA 0.596463126077  
GTGACAGA -0.89280790608  
GTGACATA 0.205154230918  
GTGACCAA -0.893410652035  
GTGACCAC -1.23404209963

GTGACCCA -1.02880109002  
GTGACCGA -0.281134462293  
GTGACCTA -0.856351969657  
GTGACGAA -0.718432926129  
GTGACGCA -0.224078781077  
GTGACGGA -0.598276068812  
GTGACGTA 0.346638519386  
GTGACTAA 0.0301456619834  
GTGACTCA -0.646839200662  
GTGACTGA 0.710271024479  
GTGACTTA 0.58130090258  
GTGAGAAA 0.61197899887  
GTGAGAAC -0.307554129656  
GTGAGACA -0.949106364819  
GTGAGAGA -0.0889204499427  
GTGAGATA 1.07087254861  
GTGAGCAA -0.191222591965  
GTGAGCAC -0.371006864  
GTGAGCCA -1.03159003163  
GTGAGCGA -0.240180410022  
GTGAGCTA -0.839514812907  
GTGAGGAA 1.37624571025  
GTGAGGCA -0.145492836592  
GTGAGGGA -0.187598013403  
GTGAGGTA 0.512800889658  
GTGAGTAA 0.70581394554  
GTGAGTCA -0.45209449172  
GTGAGTGA 1.21753323816  
GTGAGTTA 0.437807635181  
GTGATAAA 0.952827393189  
GTGATAAC 0.426664415071  
GTGATACA 0.113636432077  
GTGATAGA 0.800105264474  
GTGATATA 1.43758308335  
GTGATCAA 0.36432908704  
GTGATCAC 1.72787870913  
GTGATCCA 1.58185108579  
GTGATCGA 0.327859297393  
GTGATCTA 1.80207448836  
GTGATGAA 0.240036388763  
GTGATGCA 0.398305819045  
GTGATGGA -0.95644857379  
GTGATGTA -0.596951125512  
GTGATTAA 0.846139790785  
GTGATTCA 1.16652932499  
GTGATTGA 0.359516267753  
GTGATTTA 1.55998991343  
GTGCAAAA 0.00223585815391  
GTGCAAAC -0.0459035741326  
GTGCAACA -0.172911243025  
GTGCAAGA -0.0737545671035  
GTGCAATA 0.925630115584  
GTGCACAA -0.122525758702  
GTGCACAC -0.272543110684

GTGCACCA -0.488759010654  
GTGCACGA 0.865554692814  
GTGCACTA -0.289536573628  
GTGCAGAA 0.153464975205  
GTGCAGCA -0.374285896095  
GTGCAGGA 0.00114432861793  
GTGCAGTA 1.54898914629  
GTGCATAA 0.435591642028  
GTGCATCA -0.206311367234  
GTGCATGA -0.375063767719  
GTGCATTA 1.63249429237  
GTGCCAAA -0.837143036324  
GTGCCAAC -0.730092113505  
GTGCCACA -0.844739046823  
GTGCCAGA -0.606908718712  
GTGCCATA -0.0193741265003  
GTGCCCAA -0.448886294037  
GTGCCCAC -1.06833087399  
GTGCCCCA -0.466763749531  
GTGCCCGA -0.38492804769  
GTGCCCTA -1.30162231072  
GTGCCGAA -0.464468034992  
GTGCCGCA -1.54705858184  
GTGCCGGA -0.586579503868  
GTGCCGTA 0.106938005971  
GTGCCTAA -1.24498039657  
GTGCCTCA -1.10717296298  
GTGCCTGA 0.206169959791  
GTGCCTTA -0.274643573173  
GTGCGAAA 0.272630673518  
GTGCGAAC -0.325315008959  
GTGCGACA 0.48172967545  
GTGCGAGA 0.367942687576  
GTGCGATA 0.707313230363  
GTGCGCAA 1.52190060343  
GTGCGCAC 1.82949315618  
GTGCGCCA -0.0184990209241  
GTGCGCGA 1.54347739262  
GTGCGCTA -1.38373533844  
GTGCGGAA 1.26636245648  
GTGCGGCA -1.0142442263  
GTGCGGGA 0.737528158469  
GTGCGGTA 0.306143453194  
GTGCGTAA 1.09904112022  
GTGCGTCA 0.277017440808  
GTGCGTGA 0.257220398889  
GTGCGTTA 0.746516287337  
GTGCTAAA 0.959832942668  
GTGCTAAC 0.143977868874  
GTGCTACA 0.26552187831  
GTGCTAGA 2.04181107244  
GTGCTATA 0.443923180332  
GTGCTCAA -0.933424514713  
GTGCTCCA -0.960188944398

GTGCTCGA 0.112441656811  
GTGCTCTA -0.113005718291  
GTGCTGAA -0.318798504442  
GTGCTGCA -0.359810583427  
GTGCTGGA -0.415652669903  
GTGCTGTA -0.23890434508  
GTGCTTAA 1.54984203443  
GTGCTTCA -0.538744319757  
GTGCTTGA 0.536915955507  
GTGCTTTA 0.898391016924  
GTGGAAAA 0.809133384726  
GTGGAAAC 0.322700670257  
GTGGAAACA -0.544978009389  
GTGGAAGA -0.50605463072  
GTGGAATA 1.61899680824  
GTGGACAA 0.307791464143  
GTGGACAC -0.0741544809421  
GTGGACCA -0.44418194811  
GTGGACGA -0.67074411571  
GTGGACTA -0.245536641643  
GTGGAGAA -0.741374388622  
GTGGAGCA -0.360730385256  
GTGGAGGA -1.27420965469  
GTGGAGTA 1.08591218414  
GTGGATAA 0.431111822891  
GTGGATCA 0.646091387922  
GTGGATGA -0.261675386775  
GTGGATTA 3.03817470666  
GTGGCAA 1.1921530854  
GTGGCAAC -1.24852917447  
GTGGCACA -0.764484703625  
GTGGCAGA -1.14252325526  
GTGGCATA -0.0215409799134  
GTGGCCAA -0.858037358174  
GTGGCCAC -1.3157878862  
GTGGCCCA -0.628339918356  
GTGGCCGA -0.655860263611  
GTGGCCTA -0.516887852259  
GTGGCGAA 0.672155837699  
GTGGCGCA -0.580703645638  
GTGGCGGA -0.615587371773  
GTGGCGTA 0.693068979024  
GTGGCTAA 0.162113046619  
GTGGCTCA -0.841871429357  
GTGGCTGA -0.180071791789  
GTGGCTTA -0.987172934622  
GTGGGAAA 0.73015536785  
GTGGGAAC -0.602839007296  
GTGGGACA -0.125290130439  
GTGGGAGA 0.103301926619  
GTGGGATA 0.814343765418  
GTGGGCAA 0.209887328819  
GTGGGCCA -0.384922558676  
GTGGGCGA -0.61753178945

GTGGGCTA -0.885353825786  
GTGGGGAA 0.321291823466  
GTGGGGCA -0.464234621228  
GTGGGGGA -0.714207692664  
GTGGGGTA -0.316239055875  
GTGGGTAA 0.0172747095384  
GTGGGTCA -1.30482318972  
GTGGGTGA -0.328420222294  
GTGGGTTA -0.668522633544  
GTGGTAAA -0.220946384056  
GTGGTAAC 0.822569444177  
GTGGTACA -0.249470957394  
GTGGTAGA -0.182660515095  
GTGGTATA 0.779430503162  
GTGGTCAA 0.223693765989  
GTGGTCCA -0.338871826706  
GTGGTCGA 0.118586738083  
GTGGTCTA -0.2493473239  
GTGGTGAA 1.16189032446  
GTGGTGCA -0.61257599443  
GTGGTGGA 0.628764402065  
GTGGTGTA -0.206273466903  
GTGGTTAA -0.147653416847  
GTGGTTCA -1.20663467122  
GTGGTTGA 0.338977686252  
GTGGTTTA 0.0462316080329  
GTGTAAAA 0.744711447431  
GTGTAAAC 0.125221648462  
GTGTAACA 0.927839835579  
GTGTAAGA 2.03032309  
GTGTAATA 3.73043287998  
GTGTACAA 0.235404968302  
GTGTACAC -1.20545322642  
GTGTACCA 0.00155156114117  
GTGTACGA 0.548206072073  
GTGTACTA -0.174860104189  
GTGTAGAA 0.0276878908563  
GTGTAGCA 0.315521040637  
GTGTAGGA -0.757958789371  
GTGTAGTA 0.608199159641  
GTGTATAA 0.492027326104  
GTGTATCA 2.45946435706  
GTGTATGA 1.59876874808  
GTGTATTA 0.88202879053  
GTGTCAA -0.742754744819  
GTGTCAAC -0.781274288925  
GTGTCACA -0.527538629446  
GTGTCAGA 0.370590744503  
GTGTCATA 0.239028762719  
GTGTCCAA -0.0986224119437  
GTGTCCCA -0.952266468288  
GTGTCCGA 0.237654156917  
GTGTCCTA -0.735864464624  
GTGTCGAA 0.262392095105

GTGTCGCA -0.550049335073  
GTGTCGGA 0.817153878933  
GTGTCGTA 0.550497343125  
GTGTCTAA -0.097593091227  
GTGTCTCA 0.384797618274  
GTGTCTGA -0.466701540711  
GTGTCTTA -0.19804726538  
GTGTGAAA -0.482628043988  
GTGTGAAC -0.777294231396  
GTGTGACA -0.558732431621  
GTGTGAGA -0.0236043262154  
GTGTGATA 1.14157626975  
GTGTGCAA 0.508039039781  
GTGTGCCA -0.809653272716  
GTGTGCGA 0.869091185779  
GTGTGCTA 0.203275681403  
GTGTGGAA 0.640579111489  
GTGTGGCA -0.647922104605  
GTGTGGGA -0.126596515645  
GTGTGGTA 0.457032774173  
GTGTGTAA 2.33941440481  
GTGTGTCA 0.479212047938  
GTGTGTGA 0.530415133887  
GTGTGTTA -0.218063867839  
GTGTTAAA 0.0779544465537  
GTGTTAAC 0.783051683764  
GTGTTACA 0.575994594843  
GTGTTAGA 0.175590404362  
GTGTTATA 2.03909061281  
GTGTTCAA -0.00214123801693  
GTGTTCCA -1.02545801944  
GTGTTCGA 0.554729372511  
GTGTTCTA 0.174754506025  
GTGTTGAA 0.997668712524  
GTGTTGCA 0.422768522415  
GTGTTGGA -0.422350311865  
GTGTTGTA 0.858209870026  
GTGTTTAA 0.109336443476  
GTGTTTCA 0.302654270297  
GTGTTTGA 0.22704755322  
GTGTTTTA 1.93751877096  
GTTAAAAA 2.32345810404  
GTTAAAAC 0.832343024734  
GTTAAACA 0.448147629652  
GTTAAAGA 1.04355477409  
GTTAAATA 1.70358146031  
GTTAACAA 0.652864307782  
GTTAACCA -0.765147305966  
GTTAACGA 0.0377534346544  
GTTAACTA 0.60583757694  
GTTAAGAA 0.516298175384  
GTTAAGCA 0.348724605887  
GTTAAGGA 1.15001314484  
GTTAAGTA 1.47037549535

GTTAATAA 1.75922254434  
GTTAATCA 0.505564801613  
GTTAATGA 1.17527175516  
GTTAATTA 0.572641068993  
GTTACAAA 2.32731400531  
GTTACAAC -0.979957234342  
GTTACACA 0.262162079302  
GTTACAGA 0.70295547643  
GTTACATA 2.30504167969  
GTTACCAA 0.883109080658  
GTTACCCA 0.0370461360614  
GTTACCGA 0.247666901633  
GTTACCTA 0.799386465091  
GTTACGAA 0.855893767723  
GTTACGCA 0.616762020656  
GTTACGGA -0.275710532839  
GTTACGTA 1.41552953413  
GTTACTAA 0.466936522764  
GTTACTCA -0.42388619011  
GTTACTGA 0.132067755168  
GTTACTTA 0.641966524989  
GTTAGAAA 0.377862380444  
GTTAGAAC 0.222381369006  
GTTAGACA -0.00674730446398  
GTTAGAGA 0.635771519833  
GTTAGATA 2.58322017754  
GTTAGCAA 0.54888775527  
GTTAGCCA -0.542641780703  
GTTAGCGA 0.684638115714  
GTTAGCTA -0.460882663669  
GTTAGGAA 0.358838766661  
GTTAGGCA -0.446389315671  
GTTAGGGA -0.609971065466  
GTTAGGTA 0.958037773881  
GTTAGTAA -0.20340480391  
GTTAGTCA 0.396626180923  
GTTAGTGA -0.0792995162357  
GTTAGTTA -0.0696069639721  
GTTATAAA 1.6262838657  
GTTATAAC 1.35198923695  
GTTATACA 0.0192716649155  
GTTATAGA 0.502641509867  
GTTATATA 1.3752252765  
GTTATCAA 2.26836722826  
GTTATCCA 2.04491628577  
GTTATCGA 0.805200637264  
GTTATCTA 0.665373508101  
GTTATGAA 1.21619052091  
GTTATGCA 1.21924607175  
GTTATGGA -0.0380597738824  
GTTATGTA 0.815573304435  
GTTATTAA 1.03787207686  
GTTATTCA 0.500609529357  
GTTATTGA -0.100409739283

GTTATTTA 0.966771578458  
GTTCAAAA -0.60628035736  
GTTCAAAC -0.317440888444  
GTTCAACA 0.35265108019  
GTTCAAGA 0.462536686395  
GTTCAATA 0.570112202073  
GTTCACAA 0.0772168276958  
GTTCACCA -0.607951108508  
GTTCACGA -0.525655113681  
GTTCACTA 0.0170669111713  
GTTCAGAA 0.31369136948  
GTTCAGCA -0.385615481281  
GTTCAGGA 0.51479209464  
GTTCAGTA 0.433683817774  
GTTCATAA -0.102153677277  
GTTCATCA -0.835626500317  
GTTCATGA 0.387772140812  
GTTCATT A -0.282448166184  
GTTCCAAA 0.71278185607  
GTTCCAAC -0.539985620946  
GTTCCACA -0.0383674200184  
GTTCCAGA 0.0840187609129  
GTTCCATA 0.30659538197  
GTTCCCAA -0.315725963806  
GTTCCCCA -0.0504518752475  
GTTCCCGA 0.324803746561  
GTTCCCTA -0.359339835177  
GTTCCGAA -0.443897042173  
GTTCCGCA -0.128882559065  
GTTCCGGA 1.00373877728  
GTTCCGTA 0.491771172142  
GTTCCCTAA -0.336885326593  
GTTCCCTCA -0.196603654838  
GTTCCCTGA 0.574441465412  
GTTCCCTTA 0.251621082385  
GTTCGAAA 0.733904625433  
GTTCGAAC 0.33802625725  
GTTCGACA 0.403515415592  
GTTCGAGA 1.25260045418  
GTTCGATA 0.15019090936  
GTTCGCAA 1.04188585261  
GTTCGCCA -0.72827760248  
GTTCGCGA 1.14595179763  
GTTCGCTA -0.857375017216  
GTTCGGAA -0.423366040738  
GTTCGGCA -0.279855522154  
GTTCGGGA 0.277622277816  
GTTCGGTA -0.781787642376  
GTTCGTAA 0.474872852099  
GTTCGTCA -0.733432047511  
GTTCGTGA 0.55298935524  
GTTCGTTA 0.914637451273  
GTTCTAAA 0.0764211821241  
GTTCTACA -0.261981203239



GTTCTAGA -0.284506807617  
GTTCTATA 0.143341666075  
GTTCTCAA 0.859239974888  
GTTCTCCA 0.110448360776  
GTTCTCGA -0.131796441074  
GTTCTCTA 0.236156179003  
GTTCTGAA -0.0299679224996  
GTTCTGCA 1.54886943352  
GTTCTGGA 0.708310401143  
GTTCTGTA 0.474605458728  
GTTCTTAA 1.30045576467  
GTTCTTCA -0.601989255734  
GTTCTTGA -0.240802498215  
GTTCTTTA 0.120737385837  
GTTGAAAA 0.980285268243  
GTTGAAAC 1.04671827552  
GTTGAACA 0.0486582747504  
GTTGAAGA 1.12379238887  
GTTGAATA 1.29841019232  
GTTGACAA 0.249231009091  
GTTGACCA -0.404753580202  
GTTGACGA 1.44007823205  
GTTGACTA -0.139187789785  
GTTGAGAA 2.24414551872  
GTTGAGCA -0.54090307034  
GTTGAGGA -0.125256673595  
GTTGAGTA 1.24424225495  
GTTGATAA 0.26915273003  
GTTGATCA -0.594206618777  
GTTGATGA 0.362900113867  
GTTGATTA 1.35444936052  
GTTGCAA 1.30910488161  
GTTGCAAC 0.661764873816  
GTTGCACA 0.23243149129  
GTTGCAGA 0.124228921168  
GTTGCATA 0.437808942089  
GTTGCCAA 0.203091407379  
GTTGCCCA -0.888723557294  
GTTGCCGA -0.733773934636  
GTTGCCTA -1.03288308638  
GTTGCGAA 0.979423231746  
GTTGCGCA 0.280156372369  
GTTGCGGA 0.546217480907  
GTTGCGTA 0.453405843176  
GTTGCTAA 1.26442875544  
GTTGCTCA -0.398490615832  
GTTGCTGA 0.977001531279  
GTTGCTTA 0.132730096127  
GTTGGAAA 0.496055739228  
GTTGGACA 0.0985040060816  
GTTGGAGA 0.908761070279  
GTTGGATA 4.02773091866  
GTTGGCAA -0.741903424968  
GTTGGCCA -0.756681417522

GTTGGCGA 0.083388047127  
GTTGGCTA -0.748037528213  
GTTGGGAA 0.708696984521  
GTTGGGCA -0.799903477883  
GTTGGGGA -0.336467377424  
GTTGGGTA 0.579196780749  
GTTGGTAA 0.710997142547  
GTTGGTCA -0.862766012589  
GTTGGTGA -0.546098813663  
GTTGGTTA 0.836644843006  
GTTGTAAA 1.31579964838  
GTTGTACA 0.308058073369  
GTTGTAGA 1.10080910532  
GTTGTATA 0.904386587925  
GTTGTCAA 0.833187287283  
GTTGTCCA -0.676189478455  
GTTGTCTA 0.124360134728  
GTTGTCTA -0.471254808076  
GTTGTGAA -0.313046541088  
GTTGTGCA 0.312457648357  
GTTGTGGA 0.97243937694  
GTTGTGTA 1.95431515218  
GTTGTTAA -0.165320198776  
GTTGTTCA 0.278107402054  
GTTGTTGA 0.245334855053  
GTTGTTTA 0.542134700411  
GTTTAAAA 0.935521317859  
GTTTAAAC 1.32667939584  
GTTTAAACA 0.193769755597  
GTTTAAAGA 1.57671911958  
GTTTAAATA 0.258631336732  
GTTTACAA -0.00639156411473  
GTTTACCA 0.354693515964  
GTTTACGA 0.0594880983289  
GTTTACTA -0.486351424793  
GTTTAGAA 1.17794176814  
GTTTAGCA 0.00726091929592  
GTTTAGGA 0.898371936068  
GTTTAGTA 1.19162718563  
GTTTATAA 0.653480122817  
GTTTATCA 0.469975083793  
GTTTATGA 0.181281988569  
GTTTATTA 0.774326766161  
GTTTCAAA 1.00536247974  
GTTTCACA -0.14721612544  
GTTTCAGA 0.644092341492  
GTTTCATA 1.47755564774  
GTTTCCAA 0.139514255396  
GTTTCCCA -0.0699901493887  
GTTTCCGA 0.571103361077  
GTTTCCTA 0.571222551084  
GTTTCGAA 1.53754795116  
GTTTCGCA -0.314112716609  
GTTTCGGA -0.0482588836749

GTTTCGTA 1.04637168353  
GTTTCTAA -0.141324061551  
GTTTCTCA 0.903303945363  
GTTTCTGA 0.433750208699  
GTTTCTTA 1.44240348271  
GTTTGAAA 0.401288705794  
GTTTGACA -0.228908067405  
GTTTGAGA 0.159839549516  
GTTTGATA 1.09622159696  
GTTTGCAA 0.380808935152  
GTTTGCCA -0.186703304207  
GTTTGCGA 0.418211595707  
GTTTGCTA -0.303216763487  
GTTTGCAA 2.02252006528  
GTTTGCCA -0.827713956707  
GTTTGGA -0.386617095549  
GTTTGGA 2.02252006528  
GTTTGGA -0.827713956707  
GTTTGGA -0.386617095549  
GTTTGGA -0.118529495514  
GTTTGTA 0.681009355046  
GTTTGTA -0.444095692184  
GTTTGTA 0.773368541237  
GTTTGTA 1.53631658247  
GTTTAAA 1.51322064346  
GTTTACA 0.39512846439  
GTTTAGA 0.232258456675  
GTTTATA 0.104718353476  
GTTTCAA 0.227450342256  
GTTTCCA 0.194036364823  
GTTTCGA 1.07772440571  
GTTTCTA 0.496202635684  
GTTTGAA 1.8622042785  
GTTTGCA -0.0263425597927  
GTTTGGA 0.00420928918757  
GTTTGTA 1.58516880237  
GTTTTAA 0.223767214217  
GTTTTCA -0.0695910196949  
GTTTTGA 1.10719413489  
GTTTTTA 0.0178487035185  
TAAAAAA 2.36755187201  
TAAAAACA 1.01698716474  
TAAAAAGA 1.71254815588  
TAAAAATA 2.52509283179  
TAAAACAA 1.5726290204  
TAAAACCA 0.906165812434  
TAAAACGA 1.35317773906  
TAAAACTA 0.669751127035  
TAAAAGAA 0.0551593577529  
TAAAAGCA 0.87216294227  
TAAAAGGA -0.459881833546  
TAAAAGTA 0.661948886458  
TAAAATA 1.80501241748  
TAAAATCA 3.84356928907  
TAAAATGA 1.26686430914  
TAAAATTA 1.63195323247  
TAAACAAA 1.89968247834

TAAACACA 1.37692896173  
TAAACAGA 0.455016476558  
TAAACATA 0.952382521716  
TAAACCAA -0.311317240463  
TAAACCCA 0.118863802572  
TAAACCGA 0.326869706679  
TAAACCTA -0.35863854836  
TAAACGAA 0.334452386717  
TAAACGCA 0.427786264872  
TAAACGGA 1.284969428  
TAAACGTA 0.545726867655  
TAAACTAA -0.167366816656  
TAAACTCA 1.11563283965  
TAAACTGA 1.08690517281  
TAAACTTA 0.449434411239  
TAAAGAAA 0.917192717734  
TAAAGACA 0.320999860226  
TAAAGAGA 1.3812861929  
TAAAGATA 3.11018716544  
TAAAGCAA 1.31278121373  
TAAAGCCA 0.0200414337095  
TAAAGCGA 0.137160514143  
TAAAGCTA 0.0168842054372  
TAAAGGAA -0.470126685117  
TAAAGGCA -0.247902667831  
TAAAGGGA 0.889365510488  
TAAAGGTA 0.757410672169  
TAAAGTAA 1.47327630828  
TAAAGTCA 0.771897485627  
TAAAGTGA 0.24669560763  
TAAAGTTA 0.521032841575  
TAAATAAA 2.20355923035  
TAAATACA 1.06086267909  
TAAATAGA 0.569966089762  
TAAATATA 2.33634003451  
TAAATCAA 1.87308742393  
TAAATCCA 4.31045902453  
TAAATCGA 1.10945221048  
TAAATCTA 3.47115227137  
TAAATGAA 2.61579146072  
TAAATGCA 1.25778861743  
TAAATGGA -0.465083850027  
TAAATGTA 1.72060393661  
TAAATTAA 0.95984967109  
TAAATTCA 1.48097242793  
TAAATTGA 0.887687440656  
TAAATTTA 2.79028693758  
TAACAAA 1.36614278888  
TAACAACA 1.17908766505  
TAACAAGA 0.86873884339  
TAACAATA 1.65468140758  
TAACACAA 2.10899032417  
TAACACCA -0.436144464099  
TAACACGA 2.00989219772

TAACACTA 0.113991911044  
TAACAGAA 1.09449883088  
TAACAGCA 1.07575672507  
TAACAGGA 0.124283027158  
TAACAGTA 2.61990299319  
TAACATAA 0.895250517074  
TAACATCA 2.32852132689  
TAACATGA 1.59921989271  
TAACATTA 1.5803172986  
TAACCAAA 0.588138645075  
TAACCACA -0.410061717611  
TAACCAGA 0.112097678634  
TAACCATA 0.890081173292  
TAACCCAA 0.45891498303  
TAACCCCA 0.155535640191  
TAACCCGA 0.560502507774  
TAACCCTA -0.44107595063  
TAACCGAA 1.16912641251  
TAACCGCA 0.411996986932  
TAACCGGA -0.18530987893  
TAACCGTA 0.858209870026  
TAACCTAA 0.695849556419  
TAACCTCA 0.624590138011  
TAACCTGA 0.701666865172  
TAACCTTA 0.566672158916  
TAACGAAA 3.26916755366  
TAACGACA 2.06318058602  
TAACGAGA 2.41081261685  
TAACGATA 1.60025104309  
TAACGCAA 2.58645189957  
TAACGCCA -0.571879141647  
TAACGCGA 0.615445702949  
TAACGCTA -0.403599841847  
TAACGGAA 0.634230675337  
TAACGGCA -0.565101255537  
TAACGGGA 0.41818911689  
TAACGGTA 1.09793965818  
TAACGTAA 2.16127552991  
TAACGTCA 0.237511181185  
TAACGTGA 1.03063807987  
TAACGTTA 1.25059957808  
TAACTAAA 0.480701138879  
TAACTACA 1.52413802987  
TAACTAGA 1.03144208965  
TAACTATA -0.261231038065  
TAACTCAA 0.820483096294  
TAACTCCA 0.909350485774  
TAACTCGA -0.270201131603  
TAACTCTA 1.23067079983  
TAACTGAA 1.7966790495  
TAACTGCA 0.742760233833  
TAACTGGA 0.773860722779  
TAACTGTA 0.827069389697  
TAACTTAA 1.05922956689

TAAC TTCA 0.231994461265  
TAAC TTGA 0.00302157122506  
TAAGAAAA 1.26870548108  
TAAGAACA 0.680112554797  
TAAGAAGA 1.42494136256  
TAAGAATA 2.39934737462  
TAAGACAA -0.191222591965  
TAAGACCA -1.1236470607  
TAAGACGA -0.435000396863  
TAAGACTA 0.207087931949  
TAAGAGAA 1.39784419411  
TAAGAGCA 0.222115282543  
TAAGAGGA -0.640673993007  
TAAGAGTA 0.804558945452  
TAAGATAA 2.28252496229  
TAAGATCA 2.22175713968  
TAAGATGA 1.47724120568  
TAAGATTA 5.75864714329  
TAAGCAAA 0.857976456263  
TAAGCACA 0.335554371517  
TAAGCAGA 0.397909564549  
TAAGCATA -0.349810123646  
TAAGCCAA -0.0897354377523  
TAAGCCCA 0.0860729588591  
TAAGCCGA -0.326739015882  
TAAGCCTA -0.629141314323  
TAAGCGAA 1.25304898499  
TAAGCGCA 0.028391530107  
TAAGCGGA -0.24617075339  
TAAGCGTA 1.50134032725  
TAAGCTAA -0.476455517649  
TAAGCTCA 0.220695457726  
TAAGCTGA -0.365945209435  
TAAGCTTA 0.695767482599  
TAAGGAAA 0.225177106534  
TAAGGACA -0.528615521613  
TAAGGAGA 0.351433564726  
TAAGGATA 3.10115094236  
TAAGGCAA 0.366362635841  
TAAGGCCA -0.915798769694  
TAAGGCCG 0.276795789216  
TAAGGCTA -0.486931953313  
TAAGGGAA 0.689904693448  
TAAGGGCA -0.93311242509  
TAAGGGGA -0.814076110666  
TAAGGGTA 0.0060907139002  
TAAGGTAA 1.5412339544  
TAAGGTCA 0.275045578064  
TAAGGTGA 0.470418386976  
TAAGTAAA 2.94154297694  
TAAGTACA 1.12629799282  
TAAGTAGA 0.442088020162  
TAAGTATA 1.27363539932  
TAAGTCAA -0.803339077553

TAAGTCCA -0.442924179881  
TAAGTCGA 0.422673379515  
TAAGTCTA 0.458327135825  
TAAGTGAA 1.06539137659  
TAAGTGCA -0.105629006949  
TAAGTGGA 0.0603289629164  
TAAGTGTA 0.705942545285  
TAAGTTAA 0.350353274598  
TAAGTTCA 0.228387918033  
TAAGTTGA 0.414417380491  
TAATAAAA 2.0928066214  
TAATAACA 1.4198669003  
TAATAAGA 2.22706240189  
TAATAATA 2.81046402834  
TAATACAA 3.21800419771  
TAATACCA 1.05655876977  
TAATACGA 2.23998589204  
TAATACTA 1.35212541676  
TAATAGAA 0.501363092492  
TAATAGCA 1.10335234823  
TAATAGGA 0.220730482859  
TAATAGTA 2.59331421193  
TAATATAA 2.10366650386  
TAATATCA 4.4422029279  
TAATATGA 1.42558723648  
TAATATTA 3.225239763  
TAATCAAA 2.84951914333  
TAATCACA 3.42782565837  
TAATCAGA 3.95805599547  
TAATCATA 2.53237701405  
TAATCCAA 3.71936650606  
TAATCCCA 2.50558252548  
TAATCCGA 8.19755409937  
TAATCCTA 3.57453104418  
TAATCGAA 4.4388303212  
TAATCGCA 2.23993884335  
TAATCGGA 1.74475899384  
TAATCGTA 2.59758388027  
TAATCTAA 4.66253689488  
TAATCTCA 4.59961764037  
TAATCTGA 5.03647933556  
TAATGAAA 0.709779627082  
TAATGACA 1.42397477343  
TAATGAGA -0.372429041253  
TAATGATA 1.53048594326  
TAATGCAA 0.889410468123  
TAATGCCA -0.140471696174  
TAATGCGA 0.913289245012  
TAATGCTA 0.917408618931  
TAATGGAA 1.72828149816  
TAATGGCA 0.156320307736  
TAATGGGA 0.130422619416  
TAATGGTA 1.80447188034  
TAATGTAA 3.21672055271

TAATGTCA 0.00604183554215  
TAATGTGA 1.65424908243  
TAATTAAA 1.59347629356  
TAATTACA 2.4075286185  
TAATTAGA 0.880760305655  
TAATTATA 1.31683994712  
TAATTCAA 1.74228135771  
TAATTCCA 0.551633830295  
TAATTCGA 0.647506507871  
TAATTCTA 2.04778102804  
TAATTGAA 0.944788340888  
TAATTGCA 2.22124744557  
TAATTGGA 2.0708976162  
TAATTGTA 1.17279621008  
TAATTTAA 2.84320128883  
TAATTTCA 4.55487669157  
TAATTTGA 2.19078890982  
TACAAAAA 1.01263646811  
TACAAACA 2.15728057363  
TACAAAGA 0.422658742145  
TACAAATA 3.30072049414  
TACAACAA 0.998604981393  
TACAACCA 0.155909938634  
TACAACGA -0.356659628313  
TACAACCTA 0.596903554062  
TACAAGAA 0.76446745244  
TACAAGCA 0.16506509034  
TACAAGGA 1.39229819945  
TACAAGTA 0.136502355289  
TACAATAA 0.349469282048  
TACAATCA 3.56973077121  
TACAATGA 0.0650887217406  
TACACAAA 2.02910322211  
TACACACA 0.096707530387  
TACACAGA 4.20706692126  
TACACATA 0.607438539203  
TACACCAA 1.88789652089  
TACACCCA -0.101613140141  
TACACCGA 0.705942545285  
TACACCTA -0.461792532997  
TACACGAA 1.56479280022  
TACACGCA 0.815002447034  
TACACGGA 1.35935575441  
TACACGTA 0.233943845192  
TACACTAA 1.25608911431  
TACACTCA -0.225588259781  
TACACTGA 0.203846800185  
TACAGAAA 0.668612026049  
TACAGACA 0.242577279237  
TACAGAGA 0.964546698331  
TACAGATA 3.35910530077  
TACAGCAA 0.369990873745  
TACAGCCA -0.0881603522677  
TACAGCGA 1.29283047943



TACAGCTA 0.0693847896173  
TACAGGAA 1.73871637415  
TACAGGCA -0.316650209122  
TACAGGGA 0.170577105392  
TACAGGTA -0.0219246880932  
TACAGTAA 0.8142588164  
TACAGTCA -0.522348375137  
TACAGTGA 0.222749917053  
TACATAAA 2.03908486241  
TACATACA 2.15883161201  
TACATAGA 0.714155154964  
TACATATA 1.65895865598  
TACATCAA 1.32319465643  
TACATCCA 1.34784006553  
TACATCGA 2.81589396957  
TACATCTA 2.9108897119  
TACATGAA 0.364177747098  
TACATGCA 0.784422891605  
TACATGGA -0.307238903454  
TACATGTA 0.488740713943  
TACATTAA 1.03299940118  
TACATTCA 1.08314755102  
TACATTGA 0.508107260377  
TACCAAAA 1.77962651432  
TACCAACA 0.770388791067  
TACCAAGA 0.660738689679  
TACCAATA 0.801986166423  
TACCACAA 1.06464121141  
TACCACCA 0.453224705732  
TACCACGA -0.684792592236  
TACCACTA 0.488740713943  
TACCAGAA 1.43423034165  
TACCAGCA 0.681007263993  
TACCAGGA 0.745823626113  
TACCAGTA 1.17758681194  
TACCATAA 0.593608054927  
TACCATCA 0.768387914966  
TACCATGA 2.45209025953  
TACCCAAA 0.38666806496  
TACCCACA 0.344415207549  
TACCCAGA 2.29837801734  
TACCCATA 1.01920420342  
TACCCCAA 0.00573993980123  
TACCCCCA 0.23673461647  
TACCCCGA -0.71129119684  
TACCCCTA 0.377847743075  
TACCCGAA 1.83251289773  
TACCCGCA 0.363321722378  
TACCCGGA 0.431574991075  
TACCCGTA -0.028282795364  
TACCCTAA 0.557499756024  
TACCCTCA -0.434427448409  
TACCCTGA 0.491133139671  
TACCGAAA 1.71300191433

TACCGACA 1.2299739565  
TACCGAGA 1.89616036136  
TACCGATA 2.07125021997  
TACCGCAA 1.95841413834  
TACCGCCA 0.3486775572  
TACCGCGA 0.718317918228  
TACCGCTA 0.208325835178  
TACCGGAA -0.169228899131  
TACCGGCA -0.427330676754  
TACCGGGA 0.148270277408  
TACCGGTA 0.664448740022  
TACCGTAA 2.49390817797  
TACCGTCA 0.0722040514887  
TACCGTGA 0.597500026859  
TACCTAAA 1.74879760085  
TACCTACA 0.900626352315  
TACCTAGA -0.389943176331  
TACCTATA 1.47734262174  
TACCTCAA 1.50434203348  
TACCTCCA -0.212716000428  
TACCTCGA 0.927794355181  
TACCTCTA 0.372228822952  
TACCTGAA -0.273115274993  
TACCTGCA 0.229306412954  
TACCTGGA -0.414850751173  
TACCTTAA -0.0769925622883  
TACCTTCA 0.12188093031  
TACCTTGA 0.386561159888  
TACGAAAA 2.38090481212  
TACGAACA 0.520006657437  
TACGAAGA 2.35322450133  
TACGAATA 1.67306568199  
TACGACAA 1.43237374819  
TACGACCA -0.420616567752  
TACGACGA 1.57177377982  
TACGACTA 1.15763346382  
TACGAGAA 1.42444369201  
TACGAGCA 0.63296349737  
TACGAGGA 1.13698536343  
TACGAGTA 0.592744450141  
TACGATAA 1.9160096796  
TACGATCA 3.18898561316  
TACGATGA 0.98890589459  
TACGCAAA 1.37064168887  
TACGCACA 1.23610753699  
TACGCAGA 2.1496069328  
TACGCATA 1.70410866698  
TACGCCAA 1.28340532054  
TACGCCCA 0.127924072761  
TACGCCGA -0.529411167184  
TACGCCTA -0.556525848205  
TACGCGAA 2.80712540124  
TACGCGCA 0.665492698108  
TACGCGGA 0.0535045508822

TACGCGTA 1.64842785295  
TACGCTAA 0.701516309374  
TACGCTCA -0.469279808753  
TACGCTGA 1.20697760388  
TACGGAAA 0.129313838695  
TACGGACA -0.180281681209  
TACGGAGA -0.182775261614  
TACGGATA 2.73568667506  
TACGGCAA 0.724570427334  
TACGGCCA -0.183553133238  
TACGGCGA 0.0246592623282  
TACGGCTA 0.280666327858  
TACGGGAA 1.54896248537  
TACGGGCA -0.374606872693  
TACGGGGA -0.312523255137  
TACGGTAA 1.21812526747  
TACGGTCA 1.83911069192  
TACGGTGA 0.946080088725  
TACGTAAA 0.310193560991  
TACGTACA 0.903817298813  
TACGTAGA 0.035750206119  
TACGTATA 0.744203582994  
TACGTCAA 0.499673260487  
TACGTCCA 0.449389714986  
TACGTCGA 0.830233675272  
TACGTCTA 1.32609651488  
TACGTGAA 0.491907613334  
TACGTGCA 1.81173985694  
TACGTGGA 0.425234919134  
TACGTTAA 0.855100474586  
TACGTTCA 1.4701235235  
TACGTTGA 0.320334121306  
TACTAAAA 1.69499690462  
TACTAACA 0.100499654551  
TACTAAGA 0.373370537754  
TACTAATA 1.33285061527  
TACTACAA 0.233371942265  
TACTACCA -0.174598461213  
TACTACGA 0.612108121377  
TACTACTA 0.552960080502  
TACTAGAA 0.91110304936  
TACTAGCA -0.061436175348  
TACTAGGA 1.58010767056  
TACTAGTA 0.201893756916  
TACTATAA 2.52896702978  
TACTATCA 1.51545310365  
TACTATGA 1.03386509702  
TACTCAA 2.0758664803  
TACTCACA 0.439151397955  
TACTCAGA 1.3649780725  
TACTCATA 0.857891507245  
TACTCCAA 0.426978857129  
TACTCCCA 0.28095358623  
TACTCCGA 0.55067037774

TACTCCTA -0.0109231368075  
TACTCGAA 2.36908226124  
TACTCGCA 0.177771895145  
TACTCGGA 0.33948084582  
TACTCTAA 1.09855913256  
TACTCTCA 1.12059177125  
TACTCTGA -0.706969513567  
TACTGAAA 2.08602376904  
TACTGACA 1.87591112929  
TACTGAGA -0.570143567864  
TACTGATA 2.7929621782  
TACTGCAA 1.26006943322  
TACTGCCA 0.574544711142  
TACTGCGA 0.274097285641  
TACTGCTA 0.948793229669  
TACTGGAA 1.75332734387  
TACTGGCA -0.0727989559964  
TACTGGGA 0.522543888569  
TACTGTAA 1.92328889561  
TACTGTCA 0.0989488775544  
TACTGTGA 0.215241469388  
TACTTAAA 3.02573189727  
TACTTACA 1.20929030822  
TACTTAGA 0.308636249454  
TACTTATA 1.90136917376  
TACTTCAA 2.88364799942  
TACTTCCA 0.646170325163  
TACTTCGA 1.30451449806  
TACTTCTA 0.52979748918  
TACTTGAA 1.00894602139  
TACTTGCA 1.51909806998  
TACTTGGA 1.09526572447  
TACTTTAA 1.97367673236  
TACTTTCA 0.838875473528  
TACTTTGA 0.423015789403  
TAGAAAAA 0.0237752697778  
TAGAAACA 0.305332908871  
TAGAAAGA 1.46759648625  
TAGAAATA 2.83734503422  
TAGAACAA 0.966880574583  
TAGAACCA -0.796267137149  
TAGAACGA -0.223163422735  
TAGAACTA -0.0749948227664  
TAGAAGAA 0.29769716837  
TAGAAGCA -0.211846645247  
TAGAAGGA 0.642726884046  
TAGAATAA 1.92370762892  
TAGAATCA 3.53815639743  
TAGAATGA 0.0611727027013  
TAGACAAA -0.335544439016  
TAGACACA -0.193000248185  
TAGACAGA 0.126793074604  
TAGACATA 0.273539235938  
TAGACCAA -0.128160623103

TAGACCCA -1.06767010132  
TAGACCGA 0.300796369928  
TAGACCTA 0.371709719106  
TAGACGAA 0.508039039781  
TAGACGCA -0.354387438118  
TAGACGGA 0.138045029456  
TAGACTAA 0.346213774296  
TAGACTCA -0.204783591818  
TAGACTGA 0.621895293778  
TAGAGAAA 1.12441918193  
TAGAGACA 0.625882669992  
TAGAGAGA 0.590286417632  
TAGAGATA 2.4708841189  
TAGAGCAA 0.380113137349  
TAGAGCCA -0.84450563306  
TAGAGCGA -0.712987563384  
TAGAGCTA -0.506855503924  
TAGAGGAA 0.646578603213  
TAGAGGCA 0.462795976936  
TAGAGGGA -0.395123236758  
TAGAGTAA 0.451013417448  
TAGAGTCA -0.260808645409  
TAGAGTGA -0.00742323726571  
TAGATAAA 0.356229655591  
TAGATACA 2.09240095717  
TAGATAGA 0.358541314407  
TAGATATA 4.20233434612  
TAGATCAA 0.250359916195  
TAGATCCA 1.21890862811  
TAGATCGA 0.576572770928  
TAGATCTA 1.16271236957  
TAGATGAA 0.114847413001  
TAGATGCA 0.366914151004  
TAGATGGA -0.902676629537  
TAGATTAA 1.23070843878  
TAGATTCA 3.77782319262  
TAGATTGA 0.609166271538  
TAGCAAAA 0.506077109537  
TAGCAACA 1.37420484276  
TAGCAAGA 0.134748484795  
TAGCAATA 1.85287452389  
TAGCACAA 0.169478257171  
TAGCACCA -0.342851100091  
TAGCACGA 1.05333201399  
TAGCACTA 0.485644910345  
TAGCAGAA 0.166166552377  
TAGCAGCA -0.28702129855  
TAGCAGGA 0.00420928918757  
TAGCATAA 1.07595380679  
TAGCATCA 0.909032384374  
TAGCATGA -0.124147631492  
TAGCCAAA 1.11150954501  
TAGCCACA 0.192978292131  
TAGCCAGA 0.801986166423

TAGCCATA -0.213627176664  
TAGCCCAA -0.52599778495  
TAGCCCCA -0.00199434156118  
TAGCCCGA -0.256397046868  
TAGCCCTA -0.109806407582  
TAGCCGAA 0.110763064215  
TAGCCGCA -0.200267179257  
TAGCCGGA 0.257254901259  
TAGCCTAA 0.833426712823  
TAGCCTCA -1.32949813495  
TAGCCTGA -0.382238431089  
TAGCGAAA 2.12273063179  
TAGCGACA -0.604872033333  
TAGCGAGA 1.67402416829  
TAGCGATA 1.24908356483  
TAGCGCAA 1.56012504771  
TAGCGCCA 0.0832759144232  
TAGCGCGA 0.253451014924  
TAGCGCTA -0.596716666223  
TAGCGGAA 2.46777132549  
TAGCGGCA -0.372127406893  
TAGCGGGA 0.500797985486  
TAGCGTAA 2.29570591331  
TAGCGTCA -0.484674139105  
TAGCGTGA 0.733695781539  
TAGCTAAA 0.315030688767  
TAGCTACA 1.15294793737  
TAGCTAGA 0.323626745244  
TAGCTATA 0.847330906708  
TAGCTCAA 0.227844244318  
TAGCTCCA -0.398155263247  
TAGCTCGA 1.80595025464  
TAGCTGAA 1.42051538804  
TAGCTGCA -0.226636661354  
TAGCTGGA -0.392916653343  
TAGCTTAA -0.295307095075  
TAGCTTCA -0.938069788399  
TAGCTTGA -0.0563232899904  
TAGGAAAA -0.595830321238  
TAGGAACA 0.627545318311  
TAGGAAGA 0.80181835944  
TAGGAATA 1.5366357294  
TAGGACAA -0.356706938382  
TAGGACCA -0.625853656635  
TAGGACGA 0.261816532835  
TAGGACTA -0.674157236563  
TAGGAGAA 0.846124630652  
TAGGAGCA 0.537348019282  
TAGGAGGA -0.197050355982  
TAGGATAA 0.964736984132  
TAGGATCA 1.1655052319  
TAGGATGA 0.366415957686  
TAGGCAAA -0.158752724849  
TAGGCACA 0.0132768780603

TAGGCAGA -0.96791486155  
TAGGCATA -0.163364018928  
TAGGCCAA -0.534819936506  
TAGGCCCA -1.19697505304  
TAGGCCGA -0.902646832036  
TAGGCCTA -0.0603114503496  
TAGGCGAA -0.135025287903  
TAGGCGCA -0.718736128778  
TAGGCGGA -0.234006576775  
TAGGCTAA 0.632268483712  
TAGGCTCA -0.186784593883  
TAGGCTGA -0.593445998339  
TAGGGAAA 0.937927596812  
TAGGGACA -0.492296287764  
TAGGGAGA -0.86707096744  
TAGGGATA 1.17228076558  
TAGGGCAA 1.040315472  
TAGGGCCA -0.867870533735  
TAGGGCGA 0.0361378350227  
TAGGGGAA 0.532066804178  
TAGGGGCA 0.183547905606  
TAGGGGGA -0.036014724292  
TAGGGTAA -0.20131558083  
TAGGGTCA 0.369990873745  
TAGGGTGA -1.16746716215  
TAGGTAAA 0.0947189392209  
TAGGTACA 0.211916695514  
TAGGTAGA -0.106187840796  
TAGGTATA 1.10716381463  
TAGGTCAA 0.0379045132156  
TAGGTCCA -0.558793072151  
TAGGTCGA 0.42811717397  
TAGGTGAA -0.824662065217  
TAGGTGCA -0.00918860855066  
TAGGTGGA -0.311340242043  
TAGGTTAA -0.456623189215  
TAGGTTCA -0.623754762437  
TAGGTTGA 0.0871318156959  
TAGTAAAA 1.36647500489  
TAGTAACA 0.104432924775  
TAGTAAGA 0.822309108109  
TAGTAATA 0.364956664247  
TAGTACAA 0.264305931135  
TAGTACCA -0.462231131311  
TAGTACGA 1.3688094039  
TAGTACTA 0.355818763726  
TAGTAGAA 1.97408056693  
TAGTAGCA 0.461492728309  
TAGTAGGA -0.103510770512  
TAGTATAA 3.00155932747  
TAGTATCA 0.397224744773  
TAGTATGA -0.323996600199  
TAGTCAAA 1.41657401498  
TAGTCACA 0.147469926968

TAGTCAGA -0.0481543310374  
TAGTCATA 0.780265878736  
TAGTCCAA 1.06638880875  
TAGTCCCA -0.576513698688  
TAGTCCGA -0.700391322994  
TAGTCGAA 0.0596454500484  
TAGTCGCA 0.0613517490931  
TAGTCGGA 0.224115635881  
TAGTCTAA 1.15873544862  
TAGTCTCA -0.657764951285  
TAGTCTGA 0.416346376654  
TAGTGAAA 0.224193266215  
TAGTGACA 0.654712537032  
TAGTGAGA 0.197011148742  
TAGTGATA 1.53902763236  
TAGTGCAA 0.938936268383  
TAGTGCCA -0.748581986073  
TAGTGCGA 1.24019057886  
TAGTGGA 0.251655584755  
TAGTGGCA -0.158093781851  
TAGTGGGA -0.685872620981  
TAGTGTA 3.37736019128  
TAGTGTCA 0.455571389681  
TAGTGTGA 0.229540088099  
TAGTTAAA -0.1622837288  
TAGTTACA 0.79385981267  
TAGTTAGA -0.780850850743  
TAGTTATA 1.93587363521  
TAGTTCAA 0.0577695143492  
TAGTTCCA 0.459980374407  
TAGTTCGA 0.717679362994  
TAGTTGAA 1.15902636634  
TAGTTGCA 0.128527602861  
TAGTTGGA -0.497255480744  
TAGTTTAA -0.078929922662  
TAGTTTCA 0.233752513865  
TAGTTTGA 1.1760650483  
TATAAAAA 1.66888070129  
TATAAACA 0.672604107132  
TATAAAGA -0.0434228014253  
TATAAATA 3.46942035693  
TATAACAA 1.1525286813  
TATAACCA 0.755652619569  
TATAACGA 1.01316472032  
TATAAGAA 1.93697535863  
TATAAGCA 0.267753031595  
TATAAGGA 1.22024951569  
TATAATA 2.80438716766  
TATAATCA 2.64394644048  
TATAATGA 1.89509392446  
TATACAAA 1.78595247165  
TATACACA -0.0637656081125  
TATACAGA 2.94246408567  
TATACATA 2.42584284264



TATACCAA 2.67055038187  
TATACCCA 1.3929777916  
TATACCGA 1.48611275836  
TATACGAA 2.433770285  
TATACGCA 0.51610893511  
TATACGGA 0.47098976714  
TATACTAA 1.59549990986  
TATACTCA 0.880398030766  
TATACTGA 1.52682843062  
TATAGAAA 2.11990718781  
TATAGACA 0.97078483145  
TATAGAGA 1.46225227818  
TATAGATA 4.32941598601  
TATAGCAA 0.66255764419  
TATAGCCA 0.0210401727796  
TATAGCGA 0.451868396641  
TATAGGAA 0.175881583458  
TATAGGCA -0.891351487839  
TATAGGGA 0.176198377949  
TATAGTAA 0.606075434191  
TATAGTCA 0.221115759328  
TATAGTGA 0.849740060859  
TATATAAA 2.22518332961  
TATATACA 1.05998130036  
TATATAGA 4.88546925629  
TATATATA 2.12590406572  
TATATCAA 1.54817363571  
TATATCCA 3.41138371059  
TATATCGA 1.28123716022  
TATATGAA 2.20913763633  
TATATGCA 2.59204807949  
TATATGGA 2.05712019239  
TATATTAA 1.65158769504  
TATATTCA 1.62711192259  
TATATTGA 2.6582534234  
TATCAAAA 1.37347558811  
TATCAACA 1.83531673809  
TATCAAGA 1.90080171432  
TATCAATA 5.9183348301  
TATCACAA 2.14155899352  
TATCACCA 0.579834551838  
TATCACGA 3.08571060885  
TATCAGAA 2.03580243236  
TATCAGCA 1.52142227511  
TATCAGGA 2.85460876573  
TATCATAA 1.66078048569  
TATCATCA 1.7633356451  
TATCATGA 3.25930614889  
TATCCAAA 3.25903875552  
TATCCACA 2.88416004597  
TATCCAGA 0.678677308466  
TATCCATA 1.46365171523  
TATCCCAA 2.72697691759  
TATCCCCA 1.28401826038

TATCCCGA 1.54499314448  
TATCCGAA 1.70446963496  
TATCCGCA 4.09886801048  
TATCCGGA 5.03487968021  
TATCCTAA 2.9782710116  
TATCCTCA 3.30153705024  
TATCCTGA 2.65876311751  
TATCGAAA 2.60701374403  
TATCGACA 0.752055486074  
TATCGAGA 0.980627416749  
TATCGATA 3.52981780182  
TATCGCAA 3.14173409415  
TATCGCCA 0.0962197923329  
TATCGCGA 2.2196551089  
TATCGGAA 3.13178747898  
TATCGGCA 0.32202055535  
TATCGGGA 2.85133522265  
TATCGTAA 1.91588343229  
TATCGTCA 2.00655644582  
TATCGTGA 1.20854432515  
TATCTAAA 3.77948427265  
TATCTACA 4.40366038222  
TATCTAGA 2.40277800804  
TATCTCAA 3.7225015169  
TATCTCCA 3.7785903476  
TATCTCGA 3.01399847752  
TATCTGAA 3.9400219724  
TATCTGCA 5.44791382931  
TATCTGGA 3.05419661422  
TATCTTAA 2.84689487213  
TATCTTCA 2.57395838215  
TATCTTGA 3.94945810932  
TATGAAAA 1.26518519378  
TATGAACA 0.168716591207  
TATGAAGA 2.08666154013  
TATGAATA 0.799693327082  
TATGACAA 0.857302875896  
TATGACCA 0.234314484292  
TATGACGA 0.750258748998  
TATGAGAA 0.524342978079  
TATGAGCA -0.909002848254  
TATGAGGA 1.78711405146  
TATGATAA 2.41096866166  
TATGATCA 2.55514883989  
TATGATGA 0.69816199938  
TATGCAA 2.30385945075  
TATGCACA 0.997851941021  
TATGCAGA 0.762882957218  
TATGCATA 1.60240613434  
TATGCCAA 0.982380764481  
TATGCCCA -0.332572007531  
TATGCCGA 0.57795547956  
TATGCGAA 1.32097578808  
TATGCGCA 2.02206761374

TATGCGGA 2.20544353026  
TATGCTAA 1.36614278888  
TATGCTCA -0.597735793057  
TATGCTGA 1.95536381514  
TATGGAAA 1.74374300359  
TATGGACA 0.15118625047  
TATGGAGA -0.224542994787  
TATGGCAA 1.21361852603  
TATGGCCA -0.294846279325  
TATGGCGA 0.656428768577  
TATGGGAA 0.648773685838  
TATGGGCA 0.152008034201  
TATGGGGA 1.49075698652  
TATGGTAA 0.600107831021  
TATGGTCA 0.712536680135  
TATGGTGA 0.190290505201  
TATGTAAA 2.09626208607  
TATGTACA 0.579202792526  
TATGTAGA 1.11145831421  
TATGTCAA 2.27040757298  
TATGTCCA 0.92514891207  
TATGT CGA 2.12152618541  
TATGTGAA 1.76290122889  
TATGTGCA -0.182775261614  
TATGTGGA 1.35721085705  
TATGTTAA 0.826945494821  
TATGTTCA 0.189275821854  
TATGTTGA 1.1121572486  
TATTA AAA 2.24979711154  
TATTAACA 1.65340351297  
TATTAAGA 2.76956329791  
TATTAATA 1.43992244862  
TATTACAA 2.41738610255  
TATTACCA 1.83920112995  
TATTACGA 5.49345382164  
TATTAGAA 2.58052637884  
TATTAGCA 0.0900705289557  
TATTAGGA 1.03484580076  
TATTATAA 2.80933825781  
TATTATCA 1.1181329546  
TATTATGA 1.78162085588  
TATTCAAA 2.79064895109  
TATTCACA 1.23468091625  
TATTCAGA 0.920529776543  
TATTCCAA 1.97970053258  
TATTCCCA 2.90210807449  
TATTC CGA 2.07028859709  
TATTCGAA 2.16099663575  
TATTCGCA 2.8714101132  
TATTCGGA 1.23328226334  
TATTCTAA 2.38889550882  
TATTCTCA 1.61961915782  
TATTCTGA 2.45160565806  
TATTGAAA 1.55551898127

TATTGACA 1.58791121805  
TATTGAGA 2.45372572417  
TATTGCAA 1.17567088485  
TATTGCCA -0.208607343154  
TATTGCGA 3.24182808447  
TATTGGAA 1.17725172073  
TATTGGCA 0.12830934923  
TATTGGGA 0.737027089953  
TATTGTAA 2.15906293472  
TATTGTCA 1.04690385645  
TATTGTGA 1.01859570707  
TATTTAAA 3.46114815225  
TATTTACA 0.889569910895  
TATTTAGA 2.18039036587  
TATTTCAA 2.10086187936  
TATTTCCA 2.88702844758  
TATTTCGA 0.541935527636  
TATTTGAA 2.44782973955  
TATTTGCA 2.87634682736  
TATTTGGA 1.62569993922  
TATTTTAA 2.01225587147  
TATTTTCA 2.41741485453  
TATTTTGA 2.54921077284  
TCAAAAAA 2.83117198511  
TCAAAACA -0.639776408614  
TCAAAAGA -0.0582342508231  
TCAAACAA 0.838895338529  
TCAAACCA 0.208266501556  
TCAAACGA 0.0740933176492  
TCAAAGAA 1.44582705882  
TCAAAGCA 1.07003847994  
TCAAAGGA 0.93800914787  
TCAAATAA 0.700502671553  
TCAAATCA 3.00702115725  
TCAAATGA 1.35935575441  
TCAACAAA 2.06512291265  
TCAACACA 0.728726133295  
TCAACAGA 0.653568469796  
TCAACCAA 1.2064603297  
TCAACCCA -0.566790564778  
TCAACCGA -0.13758813443  
TCAACGAA -0.219899812154  
TCAACGCA 0.527697026692  
TCAACGGA 0.459573664647  
TCAACTAA 1.52070086191  
TCAACTCA 0.278621801031  
TCAACTGA -0.226586476088  
TCAAGAAA 1.18103469654  
TCAAGACA 0.214637677906  
TCAAGAGA 1.27573795287  
TCAAGCAA 0.888257775294  
TCAAGCCA -0.585874296328  
TCAAGCGA -1.17102456564  
TCAAGGAA -0.109539275593

TCAAGGCA -0.804215228656  
TCAAGGGA -0.00152359331063  
TCAAGTAA 2.31735013895  
TCAAGTCA -0.188153972053  
TCAAGTGA 0.623302833661  
TCAATAAA 1.747599689  
TCAATACA 1.761434094  
TCAATAGA 0.793786625824  
TCAATCAA 1.19802345462  
TCAATCCA 0.387936549835  
TCAATCGA 0.912796802089  
TCAATGAA 0.32139742163  
TCAATGCA 0.791285726734  
TCAATGGA 0.129132178487  
TCAATTAA 1.50169946556  
TCAATTCA -0.230236147283  
TCAATTGA 1.94284781889  
TCACAAAA 0.642199415989  
TCACAACA 2.00899670438  
TCACAAGA 0.588651475762  
TCACACAA 1.32947617889  
TCACACCA 1.42619886941  
TCACACGA -0.684167106081  
TCACAGAA 2.2829423887  
TCACAGCA 0.408374499422  
TCACAGGA 0.420934146389  
TCACATAA 1.491846425  
TCACATCA 0.760241957594  
TCACATGA 1.24850120664  
TCACCAA 1.2260574147  
TCACCACA 0.731351972787  
TCACCAGA 0.81750595994  
TCACCCAA 2.06262541152  
TCACCCCA -0.486122715898  
TCACCCGA -0.825588401586  
TCACCGAA -0.303216763487  
TCACCGCA 1.2877256969  
TCACCGGA -0.61148211246  
TCACCTAA 0.304241379335  
TCACCTCA 0.341409580601  
TCACCTGA 0.404544736309  
TCACGAAA 0.507259077105  
TCACGACA 0.339833188208  
TCACGAGA 0.151820884979  
TCACGCAA 1.33428769127  
TCACGCCA 0.527922337626  
TCACGCGA 1.36475642091  
TCACGGAA 0.296692156141  
TCACGGCA -0.405080829958  
TCACGGGA -0.468100455002  
TCACGTAA 0.497900570518  
TCACGTCA 0.505564801613  
TCACGTGA 0.874145260278  
TCACTAAA 0.651231718347

TCACTACA 0.138388484871  
TCACTAGA -0.524537707367  
TCACTCAA 2.16217102325  
TCACTCCA 0.442251383658  
TCACTCGA 0.553713382255  
TCACTGAA 0.554544575724  
TCACTGCA 0.550107100405  
TCACTGGA 0.114984376956  
TCACTTAA 0.517959255413  
TCACTTCA 0.350526309213  
TCAGAAAA 0.461010479268  
TCAGAACA 0.711172790978  
TCAGAAGA 0.885201701698  
TCAGACAA 0.3225339088  
TCAGACCA -0.732212179613  
TCAGACGA 0.27018753976  
TCAGAGAA 0.841005733518  
TCAGAGCA -0.820948878295  
TCAGAGGA -0.211300619097  
TCAGATAA 1.82073112239  
TCAGATCA 0.686132957049  
TCAGATGA 0.614679070735  
TCAGCAAA 1.11461057624  
TCAGCACA 0.897820420905  
TCAGCAGA 1.39181359798  
TCAGCCAA 1.01610055838  
TCAGCCCA 0.0485545062576  
TCAGCCGA 0.43787481025  
TCAGCGAA 1.60492794395  
TCAGCGCA -0.029270033644  
TCAGCGGA 0.47440079694  
TCAGCTAA 0.6998544452  
TCAGCTCA -0.0574932340045  
TCAGCTGA 0.398477023989  
TCAGGAAA 1.7762980811  
TCAGGACA 0.746423235489  
TCAGGAGA 0.718060718739  
TCAGGCAA -0.16437138359  
TCAGGCCA -0.285198684696  
TCAGGCGA 0.347462132788  
TCAGGGAA -0.124772594883  
TCAGGGCA 0.994778093477  
TCAGGGGA -0.162329993342  
TCAGGTAA 0.570246290831  
TCAGGTCA -0.668522633544  
TCAGTAAA 2.66066179341  
TCAGTACA 0.165375088911  
TCAGTAGA 0.977924208305  
TCAGTCAA -1.05270234573  
TCAGTCCA -0.977424708079  
TCAGTCGA 0.134748484795  
TCAGTGAA -0.275034077274  
TCAGTGCA -0.739648224576  
TCAGTGGA 0.532597670195

TCAGTTAA 1.8780126373  
TCAGTTCA -0.255608719981  
TCATAAAA 1.52441640127  
TCATAACA 1.11377990553  
TCATAAGA 1.38947841482  
TCATACAA -0.605063626041  
TCATACCA 0.336754374414  
TCATACGA 0.734911728714  
TCATAGAA 0.678224334163  
TCATAGCA -0.0313354709987  
TCATAGGA 1.06757391289  
TCATATAA 3.41710143296  
TCATATCA 2.18527297404  
TCATATGA 1.27526328389  
TCATCAAA 1.08102931458  
TCATCACA 0.447744579235  
TCATCAGA 1.00736806071  
TCATCCAA 1.2711648205  
TCATCCCA 1.18632427586  
TCATCCGA 0.774757261646  
TCATCGAA 0.591756950479  
TCATCGCA 0.413969372439  
TCATCGGA -0.0638597054863  
TCATCTAA 0.133643102034  
TCATCTCA -0.600530485059  
TCATGAAA 1.27071132343  
TCATGACA 1.0927475742  
TCATGAGA 3.04473799848  
TCATGCAA 0.125113436482  
TCATGCCA -0.48378936241  
TCATGCGA 1.05098350037  
TCATGGAA 1.00330802041  
TCATGGCA -1.03764310658  
TCATGGGA 0.455534534877  
TCATGTAA 1.18939916893  
TCATGTCA 0.626521747989  
TCATTAAA 0.215772074024  
TCATTACA 2.26850523774  
TCATTAGA 1.08747446193  
TCATTCAA 0.140422556434  
TCATTCCA -0.333552711271  
TCATTCGA 0.57436409646  
TCATTGAA 1.10245580936  
TCATTGCA 0.242673990427  
TCATTGGA 0.62271394093  
TCATTTAA 1.91471348828  
TCATTTCA 0.304431403754  
TCCAAAAA 1.65984944446  
TCCAAACA 1.19978908728  
TCCAAAGA 0.166201054747  
TCCAACAA 1.30654883101  
TCCAACCA 0.240219878642  
TCCAACGA 0.0862449479479  
TCCAAGAA 0.813422656681

TCCAAGCA 0.292372041158  
TCCAAGGA 0.495264014381  
TCCAATAA 0.388936857195  
TCCAATCA 1.01466139132  
TCCACAAA 0.863361178478  
TCCACACA 0.171876694677  
TCCACAGA -0.183324162961  
TCCACCAA 0.0864621560524  
TCCACCCA -0.513684882208  
TCCACCGA -0.294642401682  
TCCACGAA 0.399730610113  
TCCACGCA -0.374967579292  
TCCACGGA 0.702433236005  
TCCACTAA 1.89710551721  
TCCACTCA 0.303404958235  
TCCAGAAA 0.171487758865  
TCCAGACA -0.40923993388  
TCCAGAGA 0.0801871681285  
TCCAGCAA 2.65516807507  
TCCAGCCA -0.0900501411913  
TCCAGCGA -0.287195640073  
TCCAGGAA -0.615757792572  
TCCAGGCA 0.0471035770301  
TCCAGGGA 0.73660678835  
TCCAGTAA 0.582377010602  
TCCAGTCA 0.462477614154  
TCCATAAA 1.74374300359  
TCCATACA 0.469609410943  
TCCATAGA 0.639564689523  
TCCATCAA 1.5723179763  
TCCATCCA 0.494582069802  
TCCATCGA 0.378459898768  
TCCATGAA 0.519611448467  
TCCATGCA 0.2037344061  
TCCATGGA 0.383535406557  
TCCATTAA 1.47240904415  
TCCATTCA 0.00180771510316  
TCCCAAAA 0.831662909827  
TCCCAACA 0.706603317954  
TCCCAAGA 0.228731112066  
TCCCACAA 1.02831910237  
TCCCACCA -0.162432454927  
TCCCACGA 1.28569580745  
TCCCAGAA 0.529560677456  
TCCCAGCA 0.177323102948  
TCCCAGGA 0.404363076101  
TCCCATAA -0.683186663723  
TCCCATCA 0.956384273918  
TCCCCAAA 1.74114487054  
TCCCCACA 0.250949331689  
TCCCCAGA -0.495747831711  
TCCCCCAA -0.288875278195  
TCCCCCCA -0.664749067473  
TCCCCCGA 0.890663531484



TCCCCGAA -0.252709998105  
TCCCCGCA 1.45622560277  
TCCCCGGA 1.20403575404  
TCCCCTAA 3.39813689141  
TCCCCTCA -0.705192902873  
TCCCGAAA 0.670898069469  
TCCCGACA -0.0918442644516  
TCCCGAGA 1.17425132142  
TCCCGCAA 0.934111948305  
TCCCGCCA 0.523594903958  
TCCCGCGA 0.449440423016  
TCCCGGAA 0.524340887027  
TCCCGGCA -0.633368900222  
TCCCGGGA 0.733687155947  
TCCCGTAA 0.877683844295  
TCCCGTCA 0.0598514187444  
TCCCTAAA 1.3098150554  
TCCCTACA -0.642466025215  
TCCCTAGA 0.00700319704437  
TCCCTCAA -0.303713388516  
TCCCTCCA -0.0331502434049  
TCCCTCGA 0.0467995902364  
TCCCTGAA 0.142671745049  
TCCCTGCA -0.283402731764  
TCCCTTAA -0.256629415105  
TCCCTTCA 0.151314327451  
TCCGAAAA 0.98688384658  
TCCGAACA 1.14200781076  
TCCGAAGA 1.05173340416  
TCCGACAA 0.897425473317  
TCCGACCA -0.332971398606  
TCCGACGA 0.528595133848  
TCCGAGAA 0.646502541169  
TCCGAGCA -0.810074881227  
TCCGAGGA 0.125513873083  
TCCGATAA 1.21253562209  
TCCGATCA 1.02612898599  
TCCGAAA 0.0534478310763  
TCCGCACA 0.509778795669  
TCCGCAGA -0.0659410871182  
TCCGCCAA 0.78928772583  
TCCGCCCA -0.101540737439  
TCCGCCGA -0.37441135926  
TCCGCGAA 1.60209456748  
TCCGCGCA 1.14096097748  
TCCGCGGA 3.18087807888  
TCCGCTAA 0.615516537361  
TCCGCTCA -0.412073571739  
TCCGGAAA 2.87909734587  
TCCGGACA 0.46088945959  
TCCGGAGA 2.96716621458  
TCCGGCAA 0.69054455559  
TCCGGCCA -0.952034100051  
TCCGGCGA 0.891881569711

TCCGGGAA -0.344639472956  
TCCGGGCA -1.00373250412  
TCCGGTAA 0.787719436267  
TCCGGTCA 0.194249390822  
TCCGTAAA 0.145389852244  
TCCGTACA -0.0606295517493  
TCCGTAGA 0.0647060590872  
TCCGTCAA 0.501230572024  
TCCGTCCA 0.0116576190863  
TCCGTCTA 1.19403085077  
TCCGTGAA 0.679674217864  
TCCGTGCA 0.0123873964964  
TCCGTTAA 0.311582281399  
TCCGTTCA 0.392184000735  
TCCTAAAA 0.768289374106  
TCCTAACA 0.143635720368  
TCCTAAGA 0.587137030808  
TCCTACAA 2.02838494549  
TCCTACCA -0.690070409379  
TCCTACGA 0.401221007961  
TCCTAGAA 0.392625474247  
TCCTAGCA 0.111556618734  
TCCTAGGA 1.89700985154  
TCCTATAA 1.18059008645  
TCCTATCA 0.806998419867  
TCCTCAAA 1.84968645259  
TCCTCACA 0.891192045066  
TCCTCAGA 0.321142835958  
TCCTCCAA -0.159054359208  
TCCTCCCA -0.186366644714  
TCCTCCGA -0.889605720173  
TCCTCGAA -0.0423495686009  
TCCTCGCA 0.736418593603  
TCCTCTAA 1.9726651856  
TCCTCTCA -0.263144351332  
TCCTGAAA 0.807936257026  
TCCTGACA -0.0278543909316  
TCCTGAGA 1.23942263974  
TCCTGCAA -0.203938806506  
TCCTGCCA -0.957074059944  
TCCTGCGA 0.333951840965  
TCCTGGAA 1.10313043525  
TCCTGGCA -0.0106800519252  
TCCTGTAA 1.36567752964  
TCCTGTCA 0.941230414632  
TCCTTAAA 0.331417746412  
TCCTTACA 0.0908732318304  
TCCTTAGA 1.45809814051  
TCCTTCAA 1.36697084577  
TCCTTCCA -0.308815557228  
TCCTTCGA 0.178407575181  
TCCTTGAA 0.211008655857  
TCCTTGCA 0.583286095785  
TCCTTTAA 0.208650732499

TCCTTTCA 0.190852998391  
TCGAAAAA 1.68915999225  
TCGAAACA -0.0701804351891  
TCGAAAGA 0.249646344443  
TCGAACAA 0.365552614281  
TCGAACCA 0.246885893431  
TCGAACGA 0.703615203573  
TCGAAGAA -0.0957362363842  
TCGAAGCA 0.622260705246  
TCGAATAA 0.238072106086  
TCGAATCA 2.88543689505  
TCGACAAA 0.576572770928  
TCGACACA 0.507033243407  
TCGACAGA 0.237783540806  
TCGACCAA -0.275692497509  
TCGACCCA -0.385753229381  
TCGACCGA -1.31587283522  
TCGACGAA -0.291413293472  
TCGACGCA -0.245429997953  
TCGACTAA 0.592677013689  
TCGACTCA 1.56038381549  
TCGAGAAA 3.10073482286  
TCGAGACA 0.254546987947  
TCGAGAGA 0.458882571712  
TCGAGCAA 0.478268721766  
TCGAGCCA -0.824177986505  
TCGAGCGA 0.616623749793  
TCGAGGAA -0.306768939348  
TCGAGGCA 0.045736028531  
TCGAGTAA 1.34085411967  
TCGAGTCA 0.666500324152  
TCGATAAA 1.83576657581  
TCGATACA 0.344167417798  
TCGATAGA 0.666862860423  
TCGATCAA 1.46748095558  
TCGATCCA 0.455767425877  
TCGATCGA 2.52804513689  
TCGATGAA 0.0826763050469  
TCGATGCA -0.459889936375  
TCGATTAA 0.606075434191  
TCGATTCA 0.300398024379  
TCGCAAAA 2.1929604681  
TCGCAACA 0.979423231746  
TCGCAAGA 1.30344623149  
TCGCACAA 1.38449073124  
TCGCACCA -0.729862097702  
TCGCACGA 0.229526496256  
TCGCAGAA 0.159839549516  
TCGCAGCA 0.000206491459152  
TCGCATAA 0.578942195077  
TCGCATCA 2.24141512659  
TCGCCAAA 0.122712907924  
TCGCCACA 0.275311664526  
TCGCCAGA -0.368531318925

TCGCCCAA 0.060275118308  
TCGCCCA 0.347704956289  
TCGCCCGA -0.566074640592  
TCGCCGAA 0.0628167929267  
TCGCCGCA -0.0617195129957  
TCGCCTAA 0.351767349021  
TCGCCTCA 0.457948655278  
TCGCGAAA 1.28762428085  
TCGCGACA 0.557680632087  
TCGCGAGA 1.87929445264  
TCGCGCAA 0.296274991117  
TCGCGCCA 0.0491541156339  
TCGCGCGA 1.56394749214  
TCGCGGAA 0.523899152133  
TCGCGGCA 0.317289025738  
TCGCGTAA 3.06131638746  
TCGCGTCA 0.196232231593  
TCGCTAAA 2.07043810736  
TCGCTACA -0.0728078429706  
TCGCTAGA 0.605159030323  
TCGCTCAA -0.0696069639721  
TCGCTCCA -0.899509730146  
TCGCTGAA -0.215875842516  
TCGCTGCA -0.246777942832  
TCGCTTAA 1.06226682101  
TCGCTTCA 1.01381320805  
TCGGA AAA 0.697178420442  
TCGGAACA -0.507414337771  
TCGGAAGA 0.438268450931  
TCGGAACA 0.208073863321  
TCGGACCA -0.836959546445  
TCGGACGA -0.29384335815  
TCGGAGAA 0.766895164684  
TCGGAGCA -0.120860235186  
TCGGATAA 0.200199220043  
TCGGATCA 1.11021988822  
TCGGCAAA 1.09094142739  
TCGGCACA -0.124050658921  
TCGGCAGA -0.201153001479  
TCGGCCAA -0.15852662977  
TCGGCCCA -1.13233198692  
TCGGCCGA 1.8079247312  
TCGGCGAA 0.559415160344  
TCGGCGCA -4.07755286425E-5  
TCGGCTAA 0.219283997119  
TCGGCTCA -0.421382677204  
TCGGGAAA 0.0680067858545  
TCGGGACA 0.212010008743  
TCGGGAGA 0.134449464251  
TCGGGCAA 1.7701875022  
TCGGGCCA -0.556181347265  
TCGGGGAA 0.920392812588  
TCGGGGCA 0.126227706216  
TCGGGTAA 1.18687004062

TCGGGTCA -0.653462087487  
TCGGTAAA 1.07370383403  
TCGGTACA -0.724381971205  
TCGGTAGA 0.504229141669  
TCGGTCAA -0.180222608969  
TCGGTCCA -0.126192419701  
TCGGTGAA -0.895810396448  
TCGGTGCA -0.171937073825  
TCGGTTAA 0.648063250666  
TCGGTTCA -0.364292232236  
TCGTAAAA 0.493064488268  
TCGTAACA 0.336719087899  
TCGTAAGA 0.898249870864  
TCGTACAA 0.623951844158  
TCGTACCA 0.426721134877  
TCGTACGA -0.170692636056  
TCGTAGAA -0.217109302258  
TCGTAGCA 0.634613599372  
TCGTATAA 0.384457822202  
TCGTATCA 2.59665832805  
TCGTCAAA 0.576906293842  
TCGTCACA 0.484391324221  
TCGTCAGA 0.200731654349  
TCGTCCAA 0.163900373958  
TCGTCCCA -0.591840592589  
TCGTCGAA 0.614658160207  
TCGTCGCA 0.539346281567  
TCGTCTAA 0.396783009879  
TCGTCTCA -0.407206385079  
TCGTGAAA 1.0173925676  
TCGTGACA 0.612820647602  
TCGTGAGA 2.00312006201  
TCGTGCAA -0.0482907722294  
TCGTGCCA -0.411236105112  
TCGTGGAA 1.24076143626  
TCGTGGCA 0.352738120261  
TCGTGTAA 2.2172467389  
TCGTGTCA -0.195472918063  
TCGTTAAA 1.50601539844  
TCGTTACA 0.962130486878  
TCGTTAGA 0.269988105604  
TCGTTCAA 1.61723117558  
TCGTTCCA -0.368533932741  
TCGTTGAA -0.219899812154  
TCGTTGCA 0.711205202295  
TCGTTTAA 2.14865759485  
TCGTTTCA 0.914339737637  
TCTAAAAA 1.76339001247  
TCTAAACA 1.06303136217  
TCTAAAGA 0.276361895771  
TCTAACAA 1.13556031098  
TCTAACCA -0.173094994286  
TCTAAGAA 1.99671229223  
TCTAAGCA 1.46759648625

TCTAATAA 2.0928066214  
TCTAATCA 1.29446934203  
TCTACAAA 1.29334121907  
TCTACACA 0.840371883153  
TCTACAGA 1.81709661132  
TCTACCAA 0.0603914331173  
TCTACCCA 1.14877053674  
TCTACGAA -0.0904921374666  
TCTACGCA -0.298147528856  
TCTACTAA -0.159837458463  
TCTACTCA 0.234091003029  
TCTAGAAA 2.03509199718  
TCTAGACA 1.36288806527  
TCTAGAGA 1.502014169  
TCTAGCAA 1.86940089793  
TCTAGCCA 1.01106530335  
TCTAGGAA 2.69595588865  
TCTAGGCA -0.414095096986  
TCTAGTAA 1.69345344631  
TCTAGTCA 0.541510521164  
TCTATAAA 0.97078483145  
TCTATACA 0.140049826281  
TCTATAGA 0.343232717218  
TCTATCAA 0.738788540514  
TCTATCCA -0.187987471977  
TCTATGAA 0.397381050966  
TCTATGCA 0.0652588811582  
TCTATTAA 0.695018362951  
TCTATTCA 0.536455662521  
TCTCAAAA 1.86719640556  
TCTCAACA 0.942472499966  
TCTCAAGA 1.26639225398  
TCTCACAA 1.29749352707  
TCTCACCA 0.127986020198  
TCTCAGAA 1.27332644628  
TCTCAGCA 0.931524270526  
TCTCATAA 0.952081671502  
TCTCATCA 1.00672506199  
TCTCCAAA 0.226151014353  
TCTCCACA -0.664476707853  
TCTCCAGA 0.394007660116  
TCTCCCAA -0.685619080835  
TCTCCCCA -0.483481977656  
TCTCCGAA -0.480901357179  
TCTCCGCA -0.496033783175  
TCTCCTAA 0.450796470725  
TCTCCTCA -0.330744166045  
TCTCGAAA 1.31470184568  
TCTCGACA 0.18530491268  
TCTCGAGA 0.827819032108  
TCTCGCAA 1.24784775266  
TCTCGCCA -0.272826448332  
TCTCGGAA 0.657659614503  
TCTCGGCA 0.965730756951

TCTCGTAA 1.68208831323  
TCTCGTCA -0.224198232465  
TCTCTAAA 0.929819539771  
TCTCTACA 3.19690129335  
TCTCTCAA 0.767057744035  
TCTCTCCA -0.44652366581  
TCTCTGAA 0.542601005174  
TCTCTGCA 0.0970420988272  
TCTCTTAA 0.56158253652  
TCTCTTCA 0.107791678256  
TCTGAAAA 0.73660678835  
TCTGAACA 1.08148176612  
TCTGAAGA 1.41116106355  
TCTGACAA -0.433598084612  
TCTGACCA -0.323129597453  
TCTGAGAA 3.75434302266  
TCTGAGCA 0.109671534679  
TCTGATAA 1.11957212165  
TCTGATCA 3.01484038763  
TCTGCAA 1.25341152126  
TCTGCACA -0.232918706581  
TCTGCAGA 2.01968302946  
TCTGCCAA -0.0380597738824  
TCTGCCCA -0.0624503359321  
TCTGCGAA 1.7431904429  
TCTGCGCA 1.94286376317  
TCTGCTAA 0.509101294578  
TCTGCTCA 0.345492099715  
TCTGGAAA 2.39421357873  
TCTGGACA -0.189367828175  
TCTGGCAA 1.08220265656  
TCTGGCCA 0.184684392776  
TCTGGGAA 0.718697705683  
TCTGGGCA 0.464142614907  
TCTGGTAA 0.677084187651  
TCTGGTCA 0.256217739095  
TCTGTAAA 2.95939377151  
TCTGTACA -0.496527271624  
TCTGTCAA 0.326788678385  
TCTGTCCA 0.0487168242274  
TCTGTGAA 1.30191035324  
TCTGTGCA 1.75216315025  
TCTGTTAA 0.421665492089  
TCTGTTCA -0.159314695275  
TCTTAAAA 2.68687784451  
TCTTAACA 0.557111865739  
TCTTAAGA 1.87357751442  
TCTTACAA 0.31189567793  
TCTTACCA 1.33190650495  
TCTTAGAA 1.5274946923  
TCTTAGCA 2.2124524777  
TCTTATAA 0.706970820475  
TCTTATCA -0.0468732998459  
TCTTCAA 1.41733751062

TCTTCACA 0.995507870888  
TCTTCCAA -0.343635767636  
TCTTCCCA 0.0404817357311  
TCTTCGAA 1.084459948  
TCTTCGCA 0.534406169443  
TCTTCTAA 0.174760779183  
TCTTCTCA 0.122059453939  
TCTTGAAA 0.574024823151  
TCTTGACA 1.03827538866  
TCTTGCAA 2.25804736017  
TCTTGCCA -1.08194415016  
TCTTGCAA 0.53469421196  
TCTTGCA 1.70243634754  
TCTTGTA 1.53420958544  
TCTTGTC -0.19236482953  
TCTTTAAA 2.74895492753  
TCTTTACA -0.0381496891507  
TCTTTCAA 2.03356500591  
TCTTTCCA 0.526233812529  
TCTTTGAA 1.37227950594  
TCTTTGCA 1.53527184024  
TCTTTTAA 1.00680426061  
TCTTTTCA 0.404109535955  
TGAAAAAA 1.66662001188  
TGAAAACA 1.24529510001  
TGAAACAA 0.530675208572  
TGAAACCA 0.400811423004  
TGAAAGAA 1.48649228443  
TGAAAGCA 1.11835460619  
TGAAATA 2.23248659273  
TGAAATCA 7.59353207898  
TGAACAAA 0.173801508734  
TGAACACA 0.105553990431  
TGAACCAA -0.335310763871  
TGAACCCA -0.295049634205  
TGAACGAA 1.55070694612  
TGAACGCA 0.679933508406  
TGAACTAA 0.671909093474  
TGAACTCA -0.282300485583  
TGAAGAAA 1.16794705875  
TGAAGACA 0.739558832071  
TGAAGCAA 0.720409493742  
TGAAGCCA -0.0812002831863  
TGAAGGAA 0.0469007449132  
TGAAGGCA -1.04757560715  
TGAAGTAA 0.471082818988  
TGAAGTCA -0.638264054712  
TGAATAAA 0.785255653363  
TGAATACA 0.888218568055  
TGAATCAA 0.300811007297  
TGAATCCA 1.56088436124  
TGAATGAA 0.0236341237171  
TGAATGCA 0.773949331139  
TGAATTAA 1.59254028608



TGAATTCA 1.1384030972  
TGACAAAA 2.27772442794  
TGACAACA 0.849061514241  
TGACACAA 0.9607171966  
TGACACCA -0.680786396546  
TGACAGAA 0.277709056505  
TGACAGCA 0.32499873723  
TGACATAA 0.36524078604  
TGACATCA 0.4959297533  
TGACCAA 0.628847521411  
TGACCACA -0.381775001523  
TGACCCAA 0.0247010833832  
TGACCCCA -0.868521896667  
TGACCGAA -0.0776810414065  
TGACCGCA -0.778784890625  
TGACCTAA -0.168729398905  
TGACCTCA 0.431589628444  
TGACGAAA 1.60311918332  
TGACGACA -0.812525595051  
TGACGCAA 1.41135344041  
TGACGCCA -0.901901894493  
TGACGGAA 0.876486977977  
TGACGGCA -0.332572007531  
TGACGTAA 1.04023392094  
TGACGTCA 1.48649228443  
TGACTAAA 0.071341492229  
TGACTACA 0.375496615638  
TGACTCAA -0.289068700575  
TGACTCCA -0.16672460208  
TGACTGAA 0.546195263471  
TGACTGCA -0.117801025012  
TGACTTAA 0.50701390117  
TGAGAAAA 1.51581459439  
TGAGAACA 0.292925908755  
TGAGACAA -0.0957926948085  
TGAGACCA 0.300675088869  
TGAGAGAA -0.121249955143  
TGAGAGCA 0.639395575632  
TGAGATAA 0.58554181894  
TGAGATCA 2.94564719072  
TGAGCAA 0.805483452149  
TGAGCACA -0.137036619267  
TGAGCCAA -1.12558389831  
TGAGCCCA -1.11522142502  
TGAGCGAA 0.435508784063  
TGAGCGCA 0.577257067941  
TGAGCTAA -0.814862869263  
TGAGCTCA -0.285448042736  
TGAGGAAA 0.679367878636  
TGAGGACA 0.75831609801  
TGAGGCAA -0.0252102547281  
TGAGGCCA -1.07427416867  
TGAGGGAA -0.133862662573  
TGAGGGCA -0.552096998479

TGAGGTAA 0.964800238477  
TGAGTAAA 0.351176103856  
TGAGTACA 0.435186761939  
TGAGTCAA 0.0687344722118  
TGAGTCCA -0.557609536294  
TGAGTGAA -0.262628122684  
TGAGTGCA -0.24414713709  
TGAGTTAA 0.215836373896  
TGATAAAA 1.85057697968  
TGATAACA 0.199244915844  
TGATACAA 1.12269719999  
TGATACCA 1.06597242787  
TGATAGAA 0.287091087435  
TGATAGCA 1.43773468468  
TGATATAA 1.58110196615  
TGATATCA 6.60107819064  
TGATCAAA 1.75300218517  
TGATCACA 1.28122252285  
TGATCCAA 0.715403513456  
TGATCCCA 0.948284058324  
TGATCGAA 0.742440302762  
TGATCGCA 2.9454799065  
TGATCTAA 0.35171141336  
TGATGAAA 0.231187314903  
TGATGACA 0.776608104712  
TGATGCAA 1.51780449247  
TGATGCCA -0.440580109747  
TGATGGAA 1.12792038838  
TGATGGCA -0.047888767338  
TGATGTAA 0.460894687222  
TGATTAAA 0.471458162956  
TGATTACA 6.71452512106  
TGATTCAA 0.634982408801  
TGATTCCA 3.58920683653  
TGATTGAA -0.0304028614718  
TGATTGCA 4.65426416744  
TGATTTAA 1.02697298716  
TGCAAAAA 0.512955888943  
TGCAAACA 0.259066014323  
TGCAACAA 0.684595510514  
TGCAACCA 0.245623420332  
TGCAAGAA 1.03953054307  
TGCAAGCA -0.663295001667  
TGCAATAA 0.530952273062  
TGACAAA 1.00495655412  
TGACACA -0.306207230303  
TGACCAA 0.213739309368  
TGACCCA -0.023620009111  
TGACGAA 0.694811871491  
TGACGCA -1.30650439613  
TGCACTAA -0.0312586248101  
TGCAGAAA 0.397539970975  
TGCAGACA -0.182613205026  
TGCAGCAA 0.180453147534

TGCAGCCA -1.06531348487  
TGCAGGAA -0.16986667022  
TGCAGGCA 0.852687661093  
TGCAGTAA 2.44432565791  
TGCATAAA 0.880563223933  
TGCATACA -0.0714536249328  
TGCATCAA 1.70255501479  
TGCATCCA 0.0659834309364  
TGCATGAA 0.707866575197  
TGCATGCA 0.674519772834  
TGCATTAA 1.41876021063  
TGCCAAAA 0.0624566090904  
TGCCAACA 0.40755088602  
TGCCACAA 0.246706847039  
TGCCACCA 0.448568454019  
TGCCAGAA -0.478110585902  
TGCCAGCA 0.515442412045  
TGCCATAA 0.766883141131  
TGCCCAA 1.02996476088  
TGCCACA 0.11680202456  
TGCCCAA -0.554185698796  
TGCCCCA -0.853423450279  
TGCCCGAA 0.401555053638  
TGCCCGCA -1.04063017544  
TGCCCTAA -0.280907844451  
TGCCGAAA -1.04286864741  
TGCCGACA -0.365234512882  
TGCCGCAA -0.410582389746  
TGCCGCCA -0.707023619557  
TGCCGGAA -0.465154161676  
TGCCGGCA -0.266046993932  
TGCCGTAA 0.0951251262178  
TGCCTAAA 0.417906563387  
TGCCTACA -0.834391210904  
TGCCTCAA -0.882868609591  
TGCCTCCA -0.533458399784  
TGCCTGAA 0.32499873723  
TGCCTTAA 0.220441394816  
TGCGAAAA 0.101420763288  
TGCGAACA 0.137655048118  
TGCGACAA 0.00302157122506  
TGCGACCA -0.775450184251  
TGCGAGAA 0.463408916773  
TGCGAGCA -0.8029564149  
TGCGATAA 0.460401198773  
TGCGCAA 1.99970537286  
TGCGCACA 1.10855671714  
TGCGCCAA 0.544642395422  
TGCGCCCA -0.0164411636356  
TGCGCGAA 0.435808327369  
TGCGCGCA 0.565940813216  
TGCGCTAA 1.3106770919  
TGCGGAAA -0.297879351341  
TGCGGACA -0.647907205854

TGCGGCAA 0.161862120289  
TGCGGCCA 0.0590202252759  
TGCGGGAA -0.551652649769  
TGCGGTAA 0.137644854236  
TGCGTAAA 0.928708406615  
TGCGTACA -0.273267921844  
TGCGTCAA 0.277017440808  
TGCGTCCA -0.808365968366  
TGCGTGAA 0.712431604734  
TGCGTTAA 0.653364069389  
TGCTAAAA 0.236843089831  
TGCTAACA 0.191027339914  
TGCTACAA 0.45816220404  
TGCTACCA -0.213291301316  
TGCTAGAA 1.38418439201  
TGCTAGCA 0.364280208682  
TGCTATAA 1.90652100498  
TGCTCAAA -0.612272269018  
TGCTCACA -0.769902882684  
TGCTCCAA -0.239264006154  
TGCTCCCA -0.473026713901  
TGCTCGAA -0.124674315404  
TGCTCTAA 0.184546906057  
TGCTGAAA 0.602763206633  
TGCTGACA 0.684481548139  
TGCTGCAA -0.884712395354  
TGCTGCCA -0.431603220287  
TGCTGGAA -0.106369762386  
TGCTGTAA 0.369990873745  
TGCTTAAA 1.21782624693  
TGCTTACA 0.023363855149  
TGCTTCAA 0.29653611133  
TGCTTCCA -0.994028189685  
TGCTTGAA 0.514990221888  
TGCTTTAA 0.803814269291  
TGGA AAAA 1.50312817735  
TGGA AACA -0.0907584853107  
TGGA ACAA 0.522691569169  
TGGA ACCA -0.576061508531  
TGGA AGAA 0.390253697665  
TGGA ATAA 2.67104648413  
TGGA CAAA 1.41779858775  
TGGA CACA -0.00784040228952  
TGGA CCAA -0.998948698189  
TGGA CCCA -1.19837344457  
TGGA CGAA -0.123525804681  
TGGA CTAA 0.146203010383  
TGGA GAAA 0.158239110017  
TGGA GACA -0.919448963652  
TGGA GCAA -0.49582154132  
TGGA GCCA -1.30828492755  
TGGA GGAA -0.868671929702  
TGGA GTAA -0.462153500978  
TGGA TAAA 1.51546721826

TGGATACA 1.0869550967  
TGGATCAA -0.432610062187  
TGGATCCA 0.906643356606  
TGGATGAA 0.156555551171  
TGGATTAA 0.507578485412  
TGGCAAAA 0.00564531966425  
TGGCAACA -1.04491291285  
TGGCACAA -0.764484703625  
TGGCACCA -0.475770436492  
TGGCAGAA -0.881893133483  
TGGCATAA -0.317063714804  
TGGCCAAA -0.388207079785  
TGGCCACA -0.216626269072  
TGGCCCAA -1.46765346744  
TGGCCCCA -1.14521417877  
TGGCCGAA 1.20787361998  
TGGCCTAA 0.147996872261  
TGGCGAAA 0.862846256738  
TGGCGACA 0.213781914568  
TGGCGCAA 1.04894263288  
TGGCGCCA -0.473572478669  
TGGCGGAA 0.2108319619  
TGGCGTAA 1.1101406896  
TGGCTAAA 0.331512105168  
TGGCTACA -0.715571320439  
TGGCTCAA -0.973635981876  
TGGCTGAA 1.44092066492  
TGGCTTAA -0.418082211818  
TGGGAAAA 1.74418003361  
TGGGAACA -0.79325968053  
TGGGACAA 0.70696507008  
TGGGACCA -0.820397885895  
TGGGAGAA 0.562241218137  
TGGGATAA 0.73000768725  
TGGGCAAA 0.236738798575  
TGGGCACA -0.794221564796  
TGGGCCAA -0.747400279887  
TGGGCCCA -1.23143873896  
TGGGCGAA 0.20236842589  
TGGGCTAA -0.357563747246  
TGGGGAAA 0.486116965503  
TGGGGACA 0.130389685335  
TGGGGCAA -0.176104019194  
TGGGGGAA -0.378706381611  
TGGGGTAA 0.109152430834  
TGGGTAAA 0.422412520684  
TGGGTACA -0.483374549821  
TGGGTCAA -0.415340057517  
TGGGTGAA 0.401247146121  
TGGGTTAA 0.124853361796  
TGGTAAAA 0.0290013333655  
TGGTAACA 0.851855944861  
TGGTACAA 0.0623588523743  
TGGTACCA 0.924373131499

TGGTAGAA 1.23793511709  
TGGTATAA 0.890382023507  
TGGTCAAA 0.695367307378  
TGGTCACA -0.868327428762  
TGGTCCAA 0.587954371052  
TGGTCGAA -0.469163232562  
TGGTCTAA 0.200699243032  
TGGTGAAA 0.556259500361  
TGGTGACA 0.576913089764  
TGGTGCAA -0.128703251292  
TGGTGCAA -0.349929836416  
TGGTGTA 3.63050852632  
TGGTTAAA 1.26760741701  
TGGTTACA -0.0930910546543  
TGGTTCAA -0.10521602403  
TGGTTGAA 0.955858896914  
TGGTTTAA 0.218034070337  
TGTA AAAA 1.28118828186  
TGTA AACA -0.374285896095  
TGTA ACAA 0.605087150385  
TGTA AGAA 1.70731660328  
TGTA ATAA 2.68063762034  
TGTA CAAA 1.68195553138  
TGTA CACA -0.370769790895  
TGTA CCAA 1.11375847224  
TGTA CGAA 0.690048976088  
TGTA CTA 0.451763844004  
TGTA GAAA 0.745226891934  
TGTA GACA -0.366326826562  
TGTA GCAA 0.906915193464  
TGTA GGAA 0.582768560229  
TGTA GTAA 0.40795602749  
TGTA TAAA 1.25825283114  
TGTA TACA 1.24459956359  
TGTA TCAA 1.63999986484  
TGTA TGAA 0.772283807623  
TGTA TTAA 1.52960273485  
TGTA CAAA 0.943298465803  
TGTA AACA 0.760537057413  
TGTA CCAA 1.43478786859  
TGTA CAGAA 0.715727626632  
TGTA CATA 0.224638660451  
TGTA CCAA -0.0835932316781  
TGTA CCACA 0.0020999397251  
TGTA CCAA -0.269161355623  
TGTA CCGAA 0.516528713949  
TGTA CCTAA 0.772466251975  
TGTA CGAAA 0.562352043933  
TGTA CGACA -0.421403064968  
TGTA CGCAA 1.7633356451  
TGTA CGGAA 1.05647904838  
TGTA CGTAA 2.48131481278  
TGTA CTA 1.28475326542  
TGTA CCAA 0.30725144977

TGTCTGAA 0.497124789947  
TGTCTTAA -0.103964528959  
TGTGAAAA 0.590564004885  
TGTGAACA 0.116332060454  
TGTGACAA -0.258900559774  
TGTGAGAA 1.12667621199  
TGTGATAA 0.926296638649  
TGTGCAAA 0.310996002484  
TGTGCACA 1.39906693721  
TGTGCCAA -0.529264270729  
TGTGCGAA 1.22440391474  
TGTGCTAA 0.221675115939  
TGTGGAAA 0.47042073941  
TGTGGCAA -0.791047869483  
TGTGGGAA 0.833941111799  
TGTGGTAA 0.821752103933  
TGTGTAAA 2.14014596463  
TGTGTCAA -0.161277148282  
TGTGTGAA -0.0790093826666  
TGTGTTAA 0.347048104344  
TGTTAAAA 1.20072823135  
TGTTAACA 0.653106347138  
TGTTACAA 0.850975873035  
TGTTAGAA 0.575569588371  
TGTTATAA 1.84018575442  
TGTTCAAA 0.106940619787  
TGTTCCAA -0.60178198013  
TGTTCGAA 1.04884696722  
TGTTCTAA 1.02519611508  
TGTTGAAA 1.69461215091  
TGTTGCAA 1.06725607288  
TGTTGGAA 0.308005274287  
TGTTGTAA 0.845568410621  
TGTTTAAA 2.77146275796  
TGTTTCAA 1.46748095558  
TGTTTGAA 0.0474606242873  
TGTTTTAA 1.88385294763  
TTAAAAAA 2.07803124266  
TTAAACAA 0.503967760075  
TTAAAGAA 1.17441390077  
TTAAATAA 1.06333744002  
TTAACAAA 1.20728917074  
TTAACCAA 0.963909450005  
TTAACGAA 0.914637451273  
TTAACTAA 0.574066644206  
TTAAGAAA 1.25529529841  
TTAAGCAA 1.96468677383  
TTAAGGAA 0.331417746412  
TTAAGTAA 3.21432420625  
TTAATAAA 1.8152622353  
TTAATCAA 0.880412668135  
TTAATGAA 0.576219383013  
TTAATTAA 0.07388682619  
TTACAAAA 0.79713806062

TTACACAA 1.56835752239  
TTACAGAA 4.88439916004  
TTACATAA 3.2011069232  
TTACCAA 1.95677501436  
TTACCCAA 1.31453220903  
TTACCGAA 1.48879453351  
TTACCTAA 0.917248914777  
TTACGAAA 4.18424935364  
TTACGCAA 1.198162771  
TTACGGAA 0.340188928558  
TTACGTAA 3.96692728677  
TTACTAAA 1.71863730149  
TTACTCAA 1.80280374301  
TTACTGAA 2.46969901475  
TTAGAAAA 1.09922042799  
TTAGACAA 1.77369681148  
TTAGAGAA 0.734377987499  
TTAGATAA 0.396666433688  
TTAGCAA 0.600808595075  
TTAGCCAA 0.224615136107  
TTAGCGAA 2.26154360037  
TTAGCTAA -0.0850577527485  
TTAGGAAA 0.626819984388  
TTAGGCAA 0.0655294111079  
TTAGGGAA 1.12958382084  
TTAGTAAA 0.0538163791237  
TTAGTCAA 0.625311028446  
TTAGTGAA -0.0835610817421  
TTATAAAA 1.95199565192  
TTATACAA 1.81218708085  
TTATAGAA 1.52321430732  
TTATATAA 2.68572933379  
TTATCAA 0.806559560171  
TTATCCAA 2.58571637176  
TTATCGAA 1.22749501347  
TTATGAAA 1.79267912697  
TTATGCAA 0.990278670721  
TTATGGAA 1.34327686567  
TTATTAAA 1.2420006464  
TTATTCAA 0.689535099875  
TTATTGAA 0.183779751079  
TTCAAAAA 0.985573279268  
TTCAACAA 0.326869706679  
TTCAAGAA -0.0133087666147  
TTCACAAA 1.97919841853  
TTACCAA 0.775745806834  
TTACCGAA 0.650052887358  
TTCAGAAA 0.528608725691  
TTCAGCAA 1.18121818642  
TTCAGGAA 2.26890645849  
TTCATAAA 0.606942175556  
TTCATCAA 0.352548879987  
TTCATGAA -0.607375023476  
TTCAAAA 0.772774682256



TTCCACAA 0.765944781209  
TTCCAGAA 0.893318122951  
TTCCCAA 1.25767204124  
TTCCCCAA 1.48611275836  
TTCCCGAA 1.23630906219  
TTCCGAAA -0.031311423892  
TTCCGCAA 0.929240056777  
TTCCGGAA 3.20057919376  
TTCCTAAA 0.969838630081  
TTCCTCAA -0.0594434020763  
TTCGAAAA 1.87851239891  
TTCGACAA 0.588386173445  
TTCGAGAA 3.53418444273  
TTCGCAA 1.51767536996  
TTCGCCAA 2.73982643674  
TTCGCGAA 2.58790021498  
TTCGAAA 1.70047990631  
TTCGGCAA 0.818983811472  
TTCGTAAA 1.59873267742  
TTCGTCAA 0.794765761274  
TTCTAAAA 1.00718091149  
TTCTACAA 1.29334121907  
TTCTAGAA -0.814562019049  
TTCTCAA 1.39349166781  
TTCTCAA 0.84052060928  
TTCTGAAA 1.48840899566  
TTCTGCAA 2.19045512552  
TTCTTAAA 1.20465078493  
TTCTTCAA 1.33444870233  
TTGAAAA 1.19078083203  
TTGAACAA 0.532779069021  
TTGACAAA 0.55742029602  
TTGACCAA 0.232843951445  
TTGAGAAA 2.17914305291  
TTGAGCAA -0.0226042802373  
TTGATAAA 1.00535228586  
TTGATCAA -0.248755033208  
TTGAAAA 2.99083954554  
TTGCACAA 1.64668051699  
TTGCCAAA 0.0956886649341  
TTGCCCAA 0.335685062314  
TTGCGAAA 0.589579903184  
TTGCGCAA 1.94719250375  
TTGCTAAA 0.166936059789  
TTGAAAA 1.50312817735  
TTGACAA -0.0455311053614  
TTGGCAA 0.0956886649341  
TTGGCAA -0.770983956957  
TTGGGAAA 1.18073436909  
TTGGTAAA 0.96096655464  
TTGTAAAA 1.54434700918  
TTGTACAA 1.44240348271  
TTGTCAA 0.635634555878  
TTGTGAAA 0.129213990926

TTGTTAAA 2.16591636011  
TTTAAAAA 1.42169421902  
TTTACAAA 0.569250426958  
TTTAGAAA 1.86104661942  
TTTATAAA 1.58232314095  
TTTCAAAA 1.26107575236  
TTTCCAAA 1.14877053674  
TTTCGAAA 2.11530268966  
TTTGAAAA 0.630613154078  
TTTGCAAA 2.86273668777  
TTTTAAAA 2.2667435258
