# Supplementary material for: The intracellular immune receptor Rx1 regulates the DNA-binding activity of a Golden2-like transcription factor
Source: PubMed Central journal article supplement (PMC5836133; doi:10.1074/jbc.ra117.000485), 2017-12-07
Supplement: supp_RA117.000485_133217_1_supp_23412_zzzjtw.pdf [file supp_RA117.000485_133217_1_supp_23412_zzzjtw.pdf]

The intracellular immune receptor Rx1 regulates the DNA-binding activity of a Golden2-like transcription factor\*

Philip D. Townsend<sup>1,2,7</sup>, Christopher H. Dixon<sup>1,2,7</sup>, Erik J. Sloatweg<sup>4</sup>, Octavina C.A. Sukarta<sup>4</sup>, Ally W.H. Yang<sup>5</sup>, Timothy R. Hughes<sup>5</sup>, Gary J. Sharples<sup>1,2</sup>, Lars-Olof Pålsson<sup>3</sup>, Frank L.W. Takken<sup>6</sup>, Aska Goverse<sup>4</sup>, and Martin J. Cann<sup>1,2</sup>

**Figure S1.** **A.** cDNA sequence for *NbGlk1*. **B.** *NbGlk1* open reading frame. The AREAEAA motif typical of GARP family transcription factors is indicated in red. The GCT-box typical of GLK-like transcription factors is shown in blue. **C.** *NbGlk1* *E. coli* optimized open reading frame.

### A.

```
ATGCTAACTATATCACCTTTGAGCTACAAAACCACCAAAAATGACAGGGATAATCACATGGAAAGTTTCACGATGCGAGG
AGTTGATGATTTTCCAGAGTTTGGTGATGGGAATTTGCTCGAAAGCATTGATTTTGGATGACATTTTCTTGGGGATTAACG
TCGACGATGGTGTCTTACCAGATTTGGAGATGGACTCAGAGATTCTTGCTGAATTATCAGTTAGCAGTGGCGACGAATCT
GATCGTATGAATAGTTATAATACTACTACACCACCCTCCAAGTAGAAGAACGCAACTCTTCTACAAAAGAAGAAGTGGA
AAAAGTAGTATCACATTTGAATAAGAAGAGTGAAAAAACTAAACCTAAGTCAAAGGAGAAGTCCAAGAATCCAGAAGGGA
AGAGAAAAGTGAAGGTGGATTGGACGCCAGAGCTACATCGAAGATTTGTGCAAGCAGTAGAGCAATTAGGTGTAGATAAA
GCAGTCCCATCTAGGATTTTAGAACCTTATGGGTGTTGAAGGTCTCACTCGCCATAACATAGCTAGCCATCTTCAAAAATA
TAGAGCCCATCGAAACATTTGCTTGCAGAGAGAAGCGGAGGCGCAAGTTGGAGCCAAAGAAAACAAATGTACGGCAGTG
CAGCCGTGGTTGGAGGTGGCGGAAAGAGAGACATAAACCCATGGCCGTGAGCACCACCAACCATGGGTTTTCCGCCTATGACG
GCACCACCCATGGTGCCGCTCATTTTAGACCTCTACATGTCTGGGGTCAATCCGCCACCGATCAATCTATGATGCATAT
GTGGCCGAAACATATGATGCCCTCCCACCAGCATGGGCACCGATTGTTTCTCCTCATTCTTACCACCTTACAGATCATC
CTTCTTTTGGCATTACACCATCAAAGAGTACTAACTCTCTGCACCAGGCACCCCTTGCCTTCTTCCACCATGATAGCG
CCCCGAGATTTCCAGTTCAGGGCATCCACCCCTGCCATTGGTCAAAGCTGTTCCCAAGAACGACGACAAGATCTGCC
AAAACCTCCTTCTGATTTTTCATCCTTCAAAGGAGAGCATAAATGCGCCATTGGAAATGTTTTAGCAAAGCCATGGCTAC
CACCACCACCCCTCGGATTGAAACCTCCCTCATTCACAGTGTGTTGAATGAATTACAACGTCAAGGGATTAATAAAAATA
CCTCCA
```

### B.

```
MLTISPLSYKTTKNDRDNHMESFTMRGVDDFPEFGDGNLLESIDFDDIFLGINVDDGVLDPDLEMDSEILAEHSVSSGDES
DRMNSYNTTTPPLQVEERNSSTKEEVEKVVSHLNKKSEKTKPKSKEKSKNPEGKRKVKVDWTPELHRRFVQAVEQLGVDK
AVPSRILELMGVEGLTRHNIASHLQKYRAHRKHLAREAEAA SWSQRKQMYGSAAVVGGGKRDINPWPSAPTMGFPPMT
APPMVPPHFRPLHVWGHPPTDQSMHMWPKHMPLPPAWAPIVSPHSSPLTDHPSFWHSHHQRVLNSLAPGTPCFSPVA
PPRFVQGIPPPAMVKAAPTGARQDLPKPPSDFHP SKESIDAAIGDVLAKPCLPPPPLGLKPPSIDSVLNELQRQGINKI
PP
```

### C.

```
ATGCTGACGATCTCCCCGCTGAGCTACAAAACGACGAAAAACGACCGCGACAATCACATGGAATCATTTACGATGCGTGG
CGTGGACGATTTTCCGGAATTTGGCGACGGTAACCTGCTGGAATCCATTGATTTTGGATGACATTTTCTTGGGCATCAATG
TTGATGACGGTGTCTTCCGCGATCTGGAAATGGACAGCGAAATCCTGGCGAACTGAGCGTGAGCAGCGGCGATGAAAGT
GACCGTATGAACTCCTATAATACCACGACCCCGCCGCTGCAAGTGGAAAGAACGCAACAGTTCCACGAAAAGAAGAAGTTGA
AAAAGTGGTTTTACATCTGAACAAAAATCGGAAAAACCAAAACCGAAATCAAAGAAAAATCGAAAAACCCGGAAGGCA
AACGCAAAGTTAAAGTCGATTGGACGCCGGAACGACCCGTCGCTTTGTGAGGCAGTTGAACAACCTGGGTGTGGACAAA
GCTGTTCCGAGCCGATTTCTGGAACGATGGGCGTTGAAGGTCTGACCCGCCATAACATCGCGTCTCATCTGCAAAAATA
TCGTGCCATCGAAACACCTGCTGGCGCGTGAAGCGGAAGCCGCAAGCTGGTCTCAGCGCAAACAAATGTATGGCTCAG
CAGCTGTCTGGGCGGTGGCGGTAACCGGATATTAATCCGTGGCCGAGCGCCCCGACGATGGGCTTTCCGCCGATGACC
GCCCCGCCGATGGTTCCGCCGATTTTTCGCCGCTGCATGTCTGGGGTCAACCGCCGACCGATCAGAGTATGATGCACAT
GTGGCCGAAACACATGATGCCGCTGCCGCCGCGATGGGCTCCGATTGTGACCCGCACTCATCGCCGCTGACGGATCATC
CGAGCTTTTGGCACTCTCATCACCACAGTGTCTGAATAGTCTGGCACCAGGACCCCGTGGCTTCCGAGCCCGGTTGCT
CCGCCGCGTCTCCGAGTGCAGGGCATCCGCCGCCGCAATGGTCAAAGCTGTGCCAGCCGCGCGCTCAGGATCTGCC
GAAACCGCGTCTGACTTCCATCCGAGTAAAGAATCCATTGATGCCGCAATTTGGTGTGCTGCTGGCAAACCCGTCGCTGC
CGCCGCCGCGTGGTCTGAAACCGCGTCAATCGACTCCGTGCTGAACGAACTGCAACGCCAAGGCATCAATAAAAATT
CCGCCGTAA
```

**Figure S2.** Oligonucleotide sequences and associated *E*- and *Z*-scores for PBM with *NbG1k1* DNA-binding domain.

See attached files.

**Figure S2a**

Oligonucleotide sequence and associated *E*-score (first experiment)

**Figure S2b**

Oligonucleotide sequence and associated *E*-score (second experiment)

**Figure S2c**

Oligonucleotide sequence and associated *Z*-score (first experiment)

**Figure S2d**

Oligonucleotide sequence and associated *Z*-score (second experiment)

**Supplementary Table 1.** The oligonucleotides used for this study.

| <b>Primer Name</b> | <b>Orientation</b> | <b>Sequence</b>                                                                                                            |
|--------------------|--------------------|----------------------------------------------------------------------------------------------------------------------------|
| <i>NbGlk1-1</i>    | Sense              | 5'-GGC CAT ATG AAC TCC TAT AAT ACC ACG AC-3'                                                                               |
| <i>NbGlk1-2</i>    | Antisense          | 5'-GGC CTC GAG AGT TGG GGT ATT TTA TTA ATC CC-3'                                                                           |
| <i>NbGlk1-3</i>    | Sense              | 5'-GGC CAT ATG AAC TCC TAT AAT ACC ACG AC-3'                                                                               |
| <i>NbGlk1-4</i>    | Antisense          | 5'-GCC GGA TCC TTA CGG CGG GGC GGT CAT C-3'                                                                                |
| <i>NbGlk1-5</i>    | Sense              | 5'-GGC CAT ATG CTG ACG ATC TCC CC-3'                                                                                       |
| <i>NbGlk1-6</i>    | Antisense          | 5'-GCC GGA TCC TTA CGG CGG GGC GGT CAT C-3'                                                                                |
| <i>NbGlk1-7</i>    | Sense              | 5'-CTA CAA GTC AGC GGC CGC ATA AGG TAC-3'                                                                                  |
| <i>NbGlk1-8</i>    | Antisense          | 5'-CTT ATG CGG CCG CTG ACT TGT AGA GCT-3'                                                                                  |
| <i>NbGlk1-9</i>    | Sense              | 5'-GGC CGC TAG CTA CCC TTA TGA TGT GCC AGA CTA<br>TGC TGG AGG TTA TCC TTA CGA TGT ACC TGA TTA TGC<br>TAC TAG TTA AT-3'     |
| <i>NbGlk1-10</i>   | Antisense          | 5'-CTA GAT TAA CTA GTA GCA TAA TCA GGT ACA TCG<br>TAA GGA TAA CCT CCA GCA TAG TCT GGC ACA TCA<br>TAA GGG TAG CTA GC-3'     |
| <i>NbGlk1-11</i>   | Sense              | 5'-GGC TCA TGA TCA CTA TAT CAC CTT TGA GC-3'                                                                               |
| <i>NbGlk1-12</i>   | Antisense          | 5'-GGC GCG GCC GCA GTT GGA GGT ATT TTA TTA ATC<br>CC-3'                                                                    |
| <i>NbGlk1-13</i>   | Sense              | 5'-GGG GAC AAG TTT GTA CAA AAA AGC AGG CTA CAT<br>GCT AAC TAT ATC ACC TTT G-3'                                             |
| <i>NbGlk1-14</i>   | Antisense          | 5'-GGG GAC CAC TTT GTA AAG AAA GCT GGG TCA TGG<br>AGG TAT TTT ATT AAT C-3'                                                 |
| Rx1-9              | Sense              | 5'-CTC GAG TTA GCC AAC CAT TAT ATT CTC GGG-3'                                                                              |
| Rx1-10             | Antisense          | 5'-GG CCA TAT GCA GAT CTT CGT TCA AGA C-3'                                                                                 |
| Rx1-1              | Sense              | 5'-GGC CCA TGG CTT ATG CTG CTG TTA C-3'                                                                                    |
| Rx1-2              | Antisense          | 5'-GGC GCG GCC GCA CCA ACC ATT ATA TTC TC-3'                                                                               |
| Rx1-3              | Sense              | 5'-GCC CAT ATG GCT TAT GCT GCT GTT AC-3'                                                                                   |
| Rx1-4              | Antisense          | 5'-GCCCTCGAGTGCACATGAATTTTGATCACTC-3'                                                                                      |
| Rx1-5              | Sense              | 5'-GGC CGC TAG CGA GCA AAA GCT CAT TAG TGA GGA<br>AGA CTT AGG TGA ACA GAA GCT AAT CTC TGA AGA<br>GGA TCT TAC TAG TTA AT-3' |
| Rx1-6              | Antisense          | 5'-CTA GAT TAA CTA GTA AGA TCC TCT TCA GAG ATT<br>AGC TTC TGT TCA CCT AAG TCT TCC TCA CTA ATG AGC<br>TTT TGC TCG CTA GC-3' |
| Rx1-7              | Sense              | 5'-TTT TTT GGA TCC ATG GCT TAT GCT GCT GTT ACT<br>TCC C-3'                                                                 |
| Rx1-8              | Antisense          | 5'-GTG GTA CCT TAA GCG GCC GCA CCA ACC ATT ATA<br>TTC TCG GGC TGC-3'                                                       |
| Rx1-9              | Sense              | 5'-GGA TCC ATG GCT TAT GCT GCT GTT AC-3'                                                                                   |
| Rx1-10             | Antisense          | 5'-CTC GAG TTA GCC AAC CAT TAT ATT CTC GGG-3'                                                                              |
| FA-1               | Sense              | 5'-CAC TGT GAC ACA CTG TGA CAC ACT GTG ACA CAC<br>TGT GAC ACA CTG TGA CC-3'                                                |
| FA-2               | Antisense          | 5'-GGT CAC AGT GTG TCA CAG TGT GTC ACA GTG TGT<br>CAC AGT GTG TCA CAG TG-3'                                                |
| FA-3               | Sense              | 5'-CAG ATT TCC ACA GAT TTC CAC AGA TTT CCA CAG<br>ATT TCC ACA GAT TTC CC-3'                                                |
| FA-4               | Antisense          | 5'-GGG AAA TCT GTG GAA ATC TGT GGA AAT CTG TGG<br>AAA TCT GTG GAA ATC TG-3'                                                |
| FA-5               | Sense              | 5'-CGG ATA TCC ACG GAT ATC CAC GGA TAT CCA CGG<br>ATA TCC ACG GAT ATC CC-3'                                                |
| FA-6               | Antisense          | 5'-GGG ATA TCC GTG GAT ATC CGT GGA TAT CCG TGG<br>ATA TCC GTG GAT ATC CG-3'                                                |
