# Supplementary material for: The intracellular immune receptor Rx1 regulates the DNA-binding activity of a Golden2-like transcription factor
Source: PubMed Central journal article supplement (PMC5836133; doi:10.1074/jbc.ra117.000485), 2017-12-07
Supplement: supp_RA117.000485_133217_1_supp_23413_vzvjtw.pdf [file supp_RA117.000485_133217_1_supp_23413_vzvjtw.pdf]

#8mers all  
AAAAAAA 0.290610112187  
AAAAAAC 0.147253497596  
AAAAAAG -0.0871898978976  
AAAAAAT 0.320754579925  
AAAAACA 0.167701266768  
AAAAACC 0.0541528046141  
AAAAACG 0.029248577156  
AAAAACT -0.0286641858219  
AAAAAGA 0.0259686487586  
AAAAAGC -0.0785751918074  
AAAAAGG -0.0504249415251  
AAAAAGT 0.0360335885404  
AAAAATA 0.233454631276  
AAAAATC 0.450610898842  
AAAAATG 0.0812104860219  
AAAAATT 0.244080474862  
AAAACAA 0.162893215848  
AAAACAC -0.000946782585787  
AAAAACAG 0.101339473799  
AAAAACAT 0.0511207710378  
AAAAACCA 0.14291546206  
AAAAACCC 0.046593104309  
AAAAACCG 0.0813258175584  
AAAAACCT 0.082653669025  
AAAAACGA 0.0110293310501  
AAAAACGC 0.0909816900481  
AAAAACGG -0.332132349311  
AAAAACGT -0.0299256643288  
AAAAACTA 0.0842226838871  
AAAAACTC 0.0119716497191  
AAAAACTG -0.152398230268  
AAAAACTT -0.0829121461067  
AAAAAGAA 0.161872379196  
AAAAAGAC -0.190014818474  
AAAAAGAG -0.101639668115  
AAAAAGAT 0.21628434036  
AAAAAGCA -0.123047035775  
AAAAAGCC -0.11522989452  
AAAAAGCG -0.102747247958  
AAAAAGCT -0.123388490985  
AAAAAGGA 0.0661403104349  
AAAAAGGC -0.118942175247  
AAAAAGGG -0.00843704728039  
AAAAAGGT -0.223258070514  
AAAAAGTA -0.108548225415  
AAAAAGTC 0.0223116774781  
AAAAAGTG 0.0472462336379  
AAAAAGTT 0.123674690919  
AAAAATAA 0.202686211556  
AAAAATAC 0.276200369009  
AAAAATAG -0.0851640928043  
AAAAATAT 0.333787898091  
AAAAATCA 0.352105821336

AAAAATCC 0.440706711454  
AAAAATCG 0.380038529935  
AAAAATCT 0.446812773058  
AAAAATGA 0.0578223451667  
AAAAATGC -0.0344573975279  
AAAAATGG 0.00683055610442  
AAAAATGT 0.025659389509  
AAAAATTA 0.166551406178  
AAAAATTC 0.136212091277  
AAAAATTG 0.0195146984566  
AAAAATTT 0.251492897758  
AAAACAAA 0.00913246164366  
AAAACAAC 0.108535244152  
AAAACAAG 0.00356079206195  
AAAACAAT 0.11982479334  
AAAACACA 0.111058969461  
AAAACACC -0.0499048421542  
AAAACACG 0.050233089021  
AAAACACT 0.0170572254587  
AAAACAGA 0.122050469978  
AAAACAGC 0.102406199917  
AAAACAGG 0.104699780628  
AAAACAGT -0.0239986634318  
AAAACATA 0.184246926163  
AAAACATC 0.0234774638302  
AAAACATG -0.103886124015  
AAAACATT -0.0403238386422  
AAAACCAA 0.189348284265  
AAAACCAC 0.0211889645955  
AAAACCAG -0.0365682158267  
AAAACCAT -0.0209361788677  
AAAACCCA 0.086365551407  
AAAACCCC -0.244427437362  
AAAACCCG -0.0111380025684  
AAAACCCCT -0.104747714226  
AAAACCGA 0.036170150945  
AAAACCGC -0.144097908229  
AAAACCGG 0.110300292011  
AAAACCGT -0.0228860677512  
AAAACCTA 0.00623102291052  
AAAACCTC -0.15357346679  
AAAACCTG -0.101348154541  
AAAACCTT -0.168903269007  
AAAACGAA 0.176894662891  
AAAACGAC -0.0735032653915  
AAAACGAG -0.04806473387  
AAAACGAT 0.0428028057696  
AAAACGCA 0.158527834183  
AAAACGCC -0.286618765211  
AAAACGCG 0.100979165295  
AAAACGCT -0.105110704955  
AAAACGGA 0.032191474537  
AAAACGGC -0.196865204672  
AAAACGGG -0.251154320988

AAAACGGT -0.0970109113263  
AAAACGTA 0.229637313662  
AAAACGTC 0.0185623086042  
AAAACGTG -0.138329052229  
AAAACGTT -0.109580020085  
AAAACATA 0.00313948681416  
AAAACATC -0.01309029836  
AAAACATG 0.0117483369558  
AAAACATC -0.0970952921998  
AAAACATC -0.0509217962315  
AAAACATC -0.0865705364037  
AAAACATC -0.110551975408  
AAAACATC -0.0876613934296  
AAAACATG 0.18738831665  
AAAACATG -0.0163744134354  
AAAACATG -0.0796614634789  
AAAACATG -0.0671903688382  
AAAACATG 0.186883905245  
AAAACATC -0.0849345517412  
AAAACATG 0.012327848223  
AAAACATC -0.0694414475309  
AAAAGAAA 0.200284309205  
AAAAGAAC -0.0958500751019  
AAAAGAAG -0.123835569485  
AAAAGAAAT 0.247653625766  
AAAAGACA 0.0203571977431  
AAAAGACC -0.241593964335  
AAAAGACG 0.112229599175  
AAAAGACT -0.193156187748  
AAAAGAGA 0.00860112899805  
AAAAGAGC -0.0782919321119  
AAAAGAGG 0.00921397835298  
AAAAGAGT 0.172636671364  
AAAAGATA 0.145648093262  
AAAAGATC 0.309457946387  
AAAAGATG -0.202140701211  
AAAAGATT 0.380323936859  
AAAAGCAA 0.0848948385255  
AAAAGCAC 0.0308556968498  
AAAAGCAG 0.0471854486377  
AAAAGCAT -0.159122804469  
AAAAGCCA -0.103965827432  
AAAAGCCC -0.0661086223438  
AAAAGCCG -0.119414944705  
AAAAGCCT -0.0343174383631  
AAAAGCGA -0.0251115017506  
AAAAGCGC 0.101650371188  
AAAAGCGG -0.0926779306437  
AAAAGCGT -0.254022314076  
AAAAGCTA -0.0761820780866  
AAAAGCTC -0.0777228945419  
AAAAGCTG 0.145875869942  
AAAAGCTT -0.113209239448  
AAAAGGAA 0.0670925816154

AAAAGGAC -0.0809624946491  
AAAAGGAG -0.111256985512  
AAAAGGAT 0.0152906309474  
AAAAGGCA -0.0994566559644  
AAAAGGCC -0.266495014537  
AAAAGGCG -0.0693170426975  
AAAAGGCT -0.185081842176  
AAAAGGGA 0.0413130329929  
AAAAGGGC -0.249295709199  
AAAAGGGG -0.0599512685007  
AAAAGGGT -0.135929602739  
AAAAGGTA 0.0650343586028  
AAAAGGTC -0.119345120506  
AAAAGGTG -0.186799109004  
AAAAGGTT -0.0428371378185  
AAAAGTAA 0.063158631364  
AAAAGTAC -0.0948209620409  
AAAAGTAG 0.174089462903  
AAAAGTAT -0.0453343599727  
AAAAGTCA -0.221850399419  
AAAAGTCC -0.0590733848733  
AAAAGTCG 0.0967666688621  
AAAAGTCT -0.0899348923152  
AAAAGTGA -0.0562690376225  
AAAAGTGC -0.0592437090091  
AAAAGTGG 0.103319666057  
AAAAGTGT -0.06457863667  
AAAAGTTA 0.0295570438598  
AAAAGTTC -0.0437607344121  
AAAAGTTG -0.0310534191449  
AAAAGTTT -0.171908496732  
AAAATAAA 0.111686255139  
AAAATAAC 0.1872081705  
AAAATAAG 0.0645664143652  
AAAATAAT 0.170323984639  
AAAATACA 0.260771722865  
AAAATACC 0.18238490259  
AAAATACG 0.238806011109  
AAAATACT 0.155082987552  
AAAATAGA 0.0604376605414  
AAAATAGC -0.014532273764  
AAAATAGG 0.108719006223  
AAAATAGT 0.112771411008  
AAAATATA 0.288999462467  
AAAATATC 0.411376772218  
AAAATATG 0.191453227376  
AAAATATT 0.31541897524  
AAAATCAA 0.307691078407  
AAAATCAC 0.381786352476  
AAAATCAG 0.394591538782  
AAAATCAT 0.359657463203  
AAAATCCA 0.465624046606  
AAAATCCC 0.423010765185  
AAAATCCG 0.439277255036

AAAATCCT 0.413205077546  
AAAATCGA 0.392900207749  
AAAATCGC 0.398963204461  
AAAATCGG 0.353305827147  
AAAATCGT 0.394243013019  
AAAATCTA 0.4608571644  
AAAATCTC 0.452079079672  
AAAATCTG 0.480021210756  
AAAATCTT 0.433568794046  
AAAATGAA 0.182805879383  
AAAATGAC -0.154135775211  
AAAATGAG 0.186888556361  
AAAATGAT 0.107414648858  
AAAATGCA 0.074892856624  
AAAATGCC -0.139937942876  
AAAATGCG 0.0451193468249  
AAAATGCT 0.0511048479654  
AAAATGGA -0.107302590782  
AAAATGGC -0.128157844186  
AAAATGGG 0.0220065204505  
AAAATGGT -0.061022195877  
AAAATGTA 0.0927984148939  
AAAATGTC -0.0391901829717  
AAAATGTG 0.0886507924978  
AAAATGTT 0.0342735296055  
AAAATTAA 0.160906386529  
AAAATTAC 0.233323866443  
AAAATTAG 0.0050440185295  
AAAATTAT 0.200626857367  
AAAATTCA 0.0325928578485  
AAAATTCC 0.21253613819  
AAAATTCT 0.294951590595  
AAAATTGA 0.0832318800575  
AAAATTGC 0.13829849055  
AAAATTGG 0.0292804751556  
AAAATTGT 0.0978726206942  
AAAATTTA 0.267061296626  
AAAATTTT 0.279442999724  
AAAATTTG 0.263425102637  
AAAATTTT 0.260195905028  
AAACAAAA 0.085716439991  
AAACAAAC 0.019791379135  
AAACAAAG 0.0190504554501  
AAACAAAT 0.17868668906  
AAACAACA 0.0208170499615  
AAACAACC 0.00697017096128  
AAACAACG 0.0539174523848  
AAACAACT 0.0398805805355  
AAACAAGA 0.0760736533026  
AAACAAGC -0.0950075392433  
AAACAAGG 0.0640558628865  
AAACAAGT 0.108495795736  
AAACAATA 0.193725393343

AAACAATC 0.190471140296  
AAACAATG -0.0532666017753  
AAACAATT 0.0339963555731  
AAACACAA 0.100159807069  
AAACACAC 0.107404248902  
AAACACAG 0.0874159601606  
AAACACAT -0.0267023084858  
AAACACCA -0.200571209418  
AAACACCC -0.118810744846  
AAACACCG 0.0779545105271  
AAACACCT -0.0267851176035  
AAACACGA 0.0922440668291  
AAACACGC -0.068116204527  
AAACACGG -0.226008604416  
AAACACGT 0.0713736854816  
AAACACTA 0.153039257235  
AAACACTC -0.159772991723  
AAACACTG -0.116941037009  
AAACACTT -0.0796173347086  
AAACAGAA 0.03927089508  
AAACAGAC -0.167418604141  
AAACAGAG -0.212512072523  
AAACAGAT 0.297720586621  
AAACAGCA 0.0354288787899  
AAACAGCC -0.169368191721  
AAACAGCG -0.129466809363  
AAACAGCT 0.0858774134499  
AAACAGGA -0.0738371965407  
AAACAGGC -0.130595323866  
AAACAGGG -0.127710507356  
AAACAGGT -0.0483577172473  
AAACAGTA 0.0662167855534  
AAACAGTC -0.227684446291  
AAACAGTG -0.118171839412  
AAACAGTT -0.117538110221  
AAACATAA 0.184628092823  
AAACATAC 0.0513342141658  
AAACATAG 0.0575610535644  
AAACATAT 0.158332485872  
AAACATCA 0.0448549387648  
AAACATCC -0.0650284020746  
AAACATCG -0.0460636613252  
AAACATCT -0.142437265363  
AAACATGA -0.0303996629524  
AAACATGC -0.0263221437469  
AAACATGG -0.0521689487767  
AAACATGT -0.137727010404  
AAACATTA 0.138082065468  
AAACATTC -0.0340490752982  
AAACATTG 0.0082726843619  
AAACATTT 0.0457584140157  
AAACCAAA 0.255759592056  
AAACCAAC 0.0387532143013  
AAACCAAG 0.0121484042699

AAACCAAT -0.00091247886891  
AAACCACA 0.0743759467826  
AAACCACC -0.14477914952  
AAACCACG -0.0711734010717  
AAACCACT -0.0541423820343  
AAACCAGA 0.17607686228  
AAACCAGC 0.0224323356547  
AAACCAGG -0.178890096141  
AAACCAGT -0.0241827482491  
AAACCATA 0.104343846701  
AAACCATC -0.107913836284  
AAACCATG -0.167401597676  
AAACCATT -0.0317778820508  
AAACCCAA 0.0061743640405  
AAACCCAC -0.0758604157889  
AAACCCAG 0.0957884596384  
AAACCCAT -0.182174690992  
AAACCCCA -0.195270837448  
AAACCCCC -0.355881619225  
AAACCCCG -0.17268672892  
AAACCCCT -0.303007778693  
AAACCCGA -0.0463493474706  
AAACCCGC 0.00316272718028  
AAACCCGG -0.0238499432071  
AAACCCGT -0.140971604816  
AAACCCCTA -0.0372539334331  
AAACCCCTC -0.221723367603  
AAACCCCTG -0.131565082815  
AAACCCCTT -0.160046639232  
AAACCGAA 0.151391015509  
AAACCGAC -0.16246323368  
AAACCGAG -0.207192576754  
AAACCGAT 0.118342334629  
AAACCGCA -0.0793149053632  
AAACCGCC -0.15568089056  
AAACCGCG -0.0597218106386  
AAACCGCT -0.183041239809  
AAACCGGA 0.181428965758  
AAACCGGC 0.0854683966717  
AAACCGGG 0.0309429313561  
AAACCGGT -0.108386023842  
AAACCGTA -0.0365000960457  
AAACCGTC -0.209867854223  
AAACCGTG -0.0193425058684  
AAACCGTT -0.0651523633889  
AAACCTAA -0.102907763916  
AAACCTAC 0.0374046289463  
AAACCTAG -0.0328333964428  
AAACCTAT -0.115478255312  
AAACCTCA -0.223027716692  
AAACCTCC -0.405534470292  
AAACCTCG -0.0064628202595  
AAACCTCT -0.183005406222  
AAACCTGA -0.0854644127235

AAACCTGC -0.242035644991  
AAACCTGG -0.106753597418  
AAACCTGT -0.13182854632  
AAACCTTA 0.0286010669828  
AAACCTTC -0.176271575455  
AAACCTTG -0.145915287156  
AAACCTTT 0.0464152368777  
AAACGAAA 0.202704772256  
AAACGAAC -0.199432277109  
AAACGAAG 0.0263638080572  
AAACGAAT 0.226116833496  
AAACGACA 0.124023360888  
AAACGACC -0.200063619699  
AAACGACG -0.173342202418  
AAACGACT 0.0693983990237  
AAACGAGA 0.19979225081  
AAACGAGC -0.226048926163  
AAACGAGG 0.0665974169366  
AAACGAGT 0.0947394418375  
AAACGATA 0.109560583108  
AAACGATC 0.1777301585  
AAACGATG -0.0683930672788  
AAACGATT 0.132141560008  
AAACGCAA 0.245895137507  
AAACGCAC -0.278832941641  
AAACGCAG -0.0740987727502  
AAACGCAT 0.0147792483257  
AAACGCCA -0.120330477507  
AAACGCCC -0.2453321921  
AAACGCCG -0.286226874712  
AAACGCCT -0.0432577218956  
AAACGCGA 0.0210189879854  
AAACGCGC -0.0103564666173  
AAACGCGG -0.111465055534  
AAACGCGT -0.0282443083273  
AAACGCTA -0.040298015971  
AAACGCTC -0.18027090501  
AAACGCTG -0.0576248579756  
AAACGCTT -0.0739505806933  
AAACGGAA 0.084742783258  
AAACGGAC -0.112773908892  
AAACGGAG -0.0598250495272  
AAACGGAT 0.247115743485  
AAACGGCA -0.0306115927208  
AAACGGCC -0.151052982421  
AAACGGCG -0.134508990318  
AAACGGCT -0.129309217884  
AAACGGGA -0.00548873851625  
AAACGGGC -0.016924318006  
AAACGGGG -0.104788400912  
AAACGGGT -0.183315127711  
AAACGGTA 0.0636685891941  
AAACGGTC -0.14721739153  
AAACGGTG 0.0563014635339



AAACGGTT -0.206112834326  
AAACGTAA 0.117848996847  
AAACGTAC -0.00209918008496  
AAACGTAG -0.0280576684558  
AAACGTAT 0.193225633054  
AAACGTCA -0.105996354815  
AAACGTCC -0.0373469120916  
AAACGTCCG -0.0940025916521  
AAACGTCT -0.222958956883  
AAACGTGA -0.00517848909965  
AAACGTGC -0.10648526143  
AAACGTGG -0.0788189641924  
AAACGTGT -0.189600037438  
AAACGTTA -0.0430023214462  
AAACGTTC -0.150071317974  
AAACGTTG -0.164707528687  
AAACGTTT 0.024247960819  
AAACTAAA 0.0854226896983  
AAACTAAC 0.0543782519924  
AAACTAAG 0.0699164635887  
AAACTAAT 0.0442505774846  
AAACTACA 0.0221532069565  
AAACTACC -0.134392358287  
AAACTACG -0.0108682527922  
AAACTACT 0.113789897288  
AAACTAGA 0.153484021535  
AAACTAGC -0.111421216712  
AAACTAGG 0.0272616332282  
AAACTAGT 0.00486015060704  
AAACTATA -0.0170979036218  
AAACTATC -0.127234030189  
AAACTATG -0.00687315677073  
AAACTATT 0.0787572821176  
AAACTCAA 0.220825374871  
AAACTCAC -0.189972165889  
AAACTCAG -0.0621922201982  
AAACTCAT 0.0327367230894  
AAACTCCA -0.209272666  
AAACTCCC -0.153596869615  
AAACTCCG -0.0809129601656  
AAACTCCT -0.179061728395  
AAACTCGA -0.108619858098  
AAACTCGC -0.136616979572  
AAACTCGG 0.0430856712437  
AAACTCGT -0.11131967771  
AAACTCTA -0.160845996752  
AAACTCTC -0.000306508734773  
AAACTCTG -0.0185496174827  
AAACTCTT -0.0486205744338  
AAACTGAA 0.0852267114492  
AAACTGAC -0.00757049670943  
AAACTGAG -0.14809881679  
AAACTGAT 0.227505702207  
AAACTGCA -0.0273687850511

AAACTGCC -0.0944713359017  
AAACTGCG -0.0989072207952  
AAACTGCT -0.198048188937  
AAACTGGA 0.0715049467552  
AAACTGGC -0.193345534141  
AAACTGGG -0.0451469498642  
AAACTGGT -0.146286783672  
AAACTGTA -0.169366655142  
AAACTGTC -0.165518163014  
AAACTGTG 0.0839611814101  
AAACTGTT -0.0679558102012  
AAACTTAA 0.129244693679  
AAACTTAC 0.117089562888  
AAACTTAG -0.130557556883  
AAACTTAT 0.06679761945  
AAACTTCA 0.0347696599015  
AAACTTCC -0.109791495199  
AAACTTCG -0.155481329645  
AAACTTCT -0.00197040549738  
AAACTTGA -0.00127700376273  
AAACTTGC -0.00915985065303  
AAACTTGG -0.216174985732  
AAACTTGT -0.0218885156644  
AAACTTTA 0.0463600307992  
AAACTTTC -0.048251897342  
AAACTTTG -0.0217779643716  
AAAGAAAA 0.200147094338  
AAAGAAAC 0.00988495905508  
AAAGAAAG 0.0674080746154  
AAAGAAAT 0.246262267009  
AAAGAACA -0.254530640462  
AAAGAACC 0.0622693807346  
AAAGAACG 0.0937355628841  
AAAGAACT -0.0157659882764  
AAAGAAGA -0.080302706025  
AAAGAAGC -0.105032056775  
AAAGAAGG -0.331018861403  
AAAGAAGT 0.066536399692  
AAAGAATA 0.127911699488  
AAAGAATC 0.436900371029  
AAAGAATG 0.0936077172287  
AAAGAATT 0.0710022808827  
AAAGACAA 0.0138436505746  
AAAGACAC 0.141624953347  
AAAGACAG -0.035445344574  
AAAGACAT 0.0432501262377  
AAAGACCA -0.129139436241  
AAAGACCC -0.292562168317  
AAAGACCG -0.115565208548  
AAAGACCT -0.056201240684  
AAAGACGA 0.225929767942  
AAAGACGC -0.121965406734  
AAAGACGG -0.102007077651  
AAAGACGT -0.122388801071

AAAGACTA -0.106506701065  
AAAGACTC -0.168559857764  
AAAGACTG -0.0225058759613  
AAAGACTT -0.148160493827  
AAAGAGAA 0.100614173747  
AAAGAGAC -0.202823378351  
AAAGAGAG -0.170025889497  
AAAGAGAT 0.264351401217  
AAAGAGCA -0.132172086496  
AAAGAGCC -0.315022740606  
AAAGAGCG 0.022055393666  
AAAGAGCT -0.184496732026  
AAAGAGGA -0.0224730056134  
AAAGAGGC -0.125004115226  
AAAGAGGG -0.175330484769  
AAAGAGGT 0.0151453517935  
AAAGAGTA 0.174087246701  
AAAGAGTC -0.168152314764  
AAAGAGTG -0.0620208077304  
AAAGAGTT 0.181045428791  
AAAGATAA 0.171311725481  
AAAGATAC 0.162304417939  
AAAGATAG 0.0352203121913  
AAAGATAT 0.320603353466  
AAAGATCA 0.203944329028  
AAAGATCC 0.309658280094  
AAAGATCG 0.312799093458  
AAAGATCT 0.396754433631  
AAAGATGA -0.0749538738686  
AAAGATGC -0.0247739959492  
AAAGATGG 0.0439454912615  
AAAGATGT -0.0912467015897  
AAAGATTA 0.342872510922  
AAAGATTC 0.394951549402  
AAAGATTG 0.347112450328  
AAAGATTT 0.432915651277  
AAAGCAAA 0.10283074795  
AAAGCAAC -0.0772376621679  
AAAGCAAG -0.0567519510027  
AAAGCAAT 0.328716166156  
AAAGCACA 0.0298011128383  
AAAGCACC -0.247472222222  
AAAGCACG 0.058264043248  
AAAGCACT -0.182251965998  
AAAGCAGA 0.184691935554  
AAAGCAGC -0.100805268525  
AAAGCAGG -0.155050180805  
AAAGCAGT -0.32060769405  
AAAGCATA -0.0511513372946  
AAAGCATC -0.0538651518894  
AAAGCATG -0.0459380865356  
AAAGCATT -0.0242107709965  
AAAGCCAA -0.132269413915  
AAAGCCAC -0.0266537880541

AAAGCCAG -0.201192447349  
AAAGCCAT -0.289772290809  
AAAGCCCA -0.189159383076  
AAAGCCCC -0.254421047434  
AAAGCCCG -0.352368566898  
AAAGCCCT -0.216013620701  
AAAGCCGA 0.146320885452  
AAAGCCGC -0.1954745719  
AAAGCCGG -0.0508121755147  
AAAGCCGT -0.272545953361  
AAAGCCTA -0.0766905778996  
AAAGCCTC -0.197193041579  
AAAGCCTG 0.00115206369038  
AAAGCCTT -0.166283244041  
AAAGCGAA 0.0620208007464  
AAAGCGAC -0.21187248172  
AAAGCGAG -0.0641661050038  
AAAGCGAT 0.163052427057  
AAAGCGCA -0.26469426289  
AAAGCGCC -0.201769547325  
AAAGCGCG -0.0136473907221  
AAAGCGCT -0.0557723550462  
AAAGCGGA 0.195260792255  
AAAGCGGC -0.258637917663  
AAAGCGGG 0.0541992939433  
AAAGCGGT 0.0801577731611  
AAAGCGTA -0.0203850098344  
AAAGCGTC -0.073878323866  
AAAGCGTG -0.0345050002615  
AAAGCGTT -0.0789611310295  
AAAGCTAA -0.0779099727781  
AAAGCTAC -0.165582614101  
AAAGCTAG -0.0392881644302  
AAAGCTAT 0.0134141254473  
AAAGCTCA -0.122278746371  
AAAGCTCC -0.243018536863  
AAAGCTCG -0.1305708061  
AAAGCTCT -0.192762688615  
AAAGCTGA -0.196399934925  
AAAGCTGC -0.00536806473639  
AAAGCTGG 0.0263638080572  
AAAGCTGT 0.0293236935691  
AAAGCTTA -0.00496031746032  
AAAGCTTC -0.317534657175  
AAAGCTTG 0.0198732066174  
AAAGCTTT -0.200870353663  
AAAGGAAA -0.0464231117212  
AAAGGAAC -0.0985662476765  
AAAGGAAG -0.109608240116  
AAAGGAAT 0.230254780566  
AAAGGACA -0.0310267048635  
AAAGGACC -0.0723819245503  
AAAGGACG 0.0664681184897  
AAAGGACT -0.0743785684192

AAAGGAGA -0.0983999209838  
AAAGGAGC -0.293235286857  
AAAGGAGG -0.084809473638  
AAAGGAGT 0.0365035923986  
AAAGGATA 0.0972935739533  
AAAGGATC 0.145993874728  
AAAGGATG -0.108309183517  
AAAGGATT 0.329050019613  
AAAGGCAA -0.0183803957081  
AAAGGCAC -0.219931526015  
AAAGGCAG -0.0383859649123  
AAAGGCAT -0.313451021054  
AAAGGCCA -0.263549802915  
AAAGGCCC -0.494610964481  
AAAGGCCG -0.261397242386  
AAAGGCCT -0.305770887166  
AAAGGCCG -0.0740216049383  
AAAGGCCG -0.221460411933  
AAAGGCCG -0.171825708061  
AAAGGCCG -0.172098333604  
AAAGGCTA -0.123938800261  
AAAGGCTC -0.284838460146  
AAAGGCTG -0.273627867262  
AAAGGCTT -0.123252227929  
AAAGGGAA -0.015451611841  
AAAGGGAC -0.225286825354  
AAAGGGAG -0.178174039576  
AAAGGGAT 0.165945113536  
AAAGGGCA 0.0482526096822  
AAAGGGCC -0.338101508916  
AAAGGGCG -0.268353853169  
AAAGGGCT -0.279604757829  
AAAGGGGA 0.0279769363149  
AAAGGGGC -0.212894386017  
AAAGGGGG -0.0359570734655  
AAAGGGGT -0.160756034114  
AAAGGGTA -0.0881219931671  
AAAGGGTC -0.268133763701  
AAAGGGTG -0.266161148179  
AAAGGGTT -0.162925027744  
AAAGGTAA 0.0132857786236  
AAAGGTAC -0.0165268305873  
AAAGGTAG -0.0438547047783  
AAAGGTAT 0.0371550418231  
AAAGGTCA -0.246565493236  
AAAGGTCC -0.294627934843  
AAAGGTCC -0.133590941348  
AAAGGTCT -0.0515337815458  
AAAGGTGA 0.0491755408017  
AAAGGTGC -0.137345602801  
AAAGGTGG -0.161408151231  
AAAGGTGT -0.144952483883  
AAAGGTTA -0.0837518180072  
AAAGGTTC -0.202087848871

AAAGGTTG 0.0760585969051  
AAAGTAAA 0.123247766142  
AAAGTAAC 0.0421135211309  
AAAGTAAG 0.0367788699002  
AAAGTAAT 0.20100969012  
AAAGTACA 0.120147189568  
AAAGTACC -0.162990680271  
AAAGTACG 0.139680513342  
AAAGTACT -0.170814106147  
AAAGTAGA -0.0911407336816  
AAAGTAGC -0.0576873209523  
AAAGTAGG 0.0968968372728  
AAAGTAGT -0.0104250706622  
AAAGTATA 0.110806494105  
AAAGTATC 0.234480998485  
AAAGTATG -0.0345052518414  
AAAGTATT -0.0678351953278  
AAAGTCAA -0.00602922127818  
AAAGTCAC -0.168730497237  
AAAGTCAG -0.173305268173  
AAAGTCAT -0.172552796493  
AAAGTCCA -0.13580426244  
AAAGTCCC -0.339445717555  
AAAGTCCG -0.0232540270574  
AAAGTCCT -0.274705893245  
AAAGTCGA -0.0590811147881  
AAAGTCGC 0.00150380066409  
AAAGTCGG -0.16188430133  
AAAGTCGT -0.0310270258403  
AAAGTCTA -0.160728593851  
AAAGTCTC -0.185571428156  
AAAGTCTG -0.137430196814  
AAAGTCTT -0.102854021893  
AAAGTGAA 0.0764357789697  
AAAGTGAC -0.186592592593  
AAAGTGAG -0.0912069277753  
AAAGTGAT 0.0981014879738  
AAAGTGCA -0.150631369256  
AAAGTGCC -0.118765810109  
AAAGTGCG -0.106246113975  
AAAGTGCT -0.0730560768433  
AAAGTGGA 0.238759025467  
AAAGTGGC -0.138743809388  
AAAGTGGG -0.180805213508  
AAAGTGGT 0.0432539624889  
AAAGTGTA 0.0600205273442  
AAAGTGTC 0.0993737513447  
AAAGTGTG -0.184495690199  
AAAGTGTT -0.0159236331207  
AAAGTTAA -0.0501653195112  
AAAGTTAC 0.0318859909109  
AAAGTTAG 0.00985339963556  
AAAGTTAT 0.126426278093  
AAAGTTCA 0.0342505927097

AAAGTTCC -0.162521423384  
AAAGTTCG 0.0583571833278  
AAAGTTCT 0.0237436606731  
AAAGTTGA 0.0795330727994  
AAAGTTGC 0.0438292679383  
AAAGTTGG -0.0214521723858  
AAAGTTGT -0.143317309803  
AAAGTTTA -0.081911787306  
AAAGTTTC -0.201330217275  
AAAGTTTG 0.111882220576  
AAATAAAA 0.284606220853  
AAATAAAC 0.12002237299  
AAATAAAG 0.145051065623  
AAATAAAT 0.167836648119  
AAATAACA 0.135584754879  
AAATAACC 0.186126479176  
AAATAACG 0.0881858992053  
AAATAACT 0.121508569594  
AAATAAGA 0.150293668767  
AAATAAGC -0.0148555124905  
AAATAAGG 0.0940926602786  
AAATAAGT 0.0327641660629  
AAATAATA 0.235307775911  
AAATAATC 0.20982231058  
AAATAATG 0.116390394142  
AAATAATT 0.15080737228  
AAATACAA 0.212886122637  
AAATACAC 0.102935849305  
AAATACAG 0.169277817326  
AAATACAT 0.173864958616  
AAATACCA 0.121826740081  
AAATACCC 0.104468786774  
AAATACCG 0.19519288019  
AAATACCT 0.163010474627  
AAATACGA 0.139298011128  
AAATACGC 0.205100751093  
AAATACGG 0.161503929801  
AAATACGT 0.228542995366  
AAATACTA 0.107147734372  
AAATACTC 0.082194449933  
AAATACTG 0.103018178226  
AAATACTT 0.0742661748886  
AAATAGAA 0.0486234800169  
AAATAGAC 0.0309255734895  
AAATAGAG 0.012547353987  
AAATAGAT 0.23106794706  
AAATAGCA -0.0542794572878  
AAATAGCC -0.0180480292883  
AAATAGCG 0.0907676348548  
AAATAGCT 0.0476995045981  
AAATAGGA 0.204031496521  
AAATAGGC -0.0856086470152  
AAATAGGG -0.201862217407  
AAATAGGT 0.158230790464

AAATAGTA -0.0333404685064  
AAATAGTC 0.0920773132753  
AAATAGTG -0.0309306639446  
AAATAGTT 0.0533685666304  
AAATATAA 0.155967341246  
AAATATAC 0.241712222003  
AAATATAG 0.241542574056  
AAATATAT 0.342609661039  
AAATATCA 0.387818612922  
AAATATCC 0.427748139366  
AAATATCG 0.366613397644  
AAATATCT 0.389536543064  
AAATATGA 0.264404816791  
AAATATGC 0.176856242728  
AAATATGG 0.230924530117  
AAATATGT 0.230946343498  
AAATATTA 0.326554123749  
AAATATTC 0.325347428045  
AAATATTG 0.253795363235  
AAATATTT 0.304647133026  
AAATCAAA 0.290237240858  
AAATCAAC 0.34219778304  
AAATCAAG 0.300173988452  
AAATCAAT 0.289187685412  
AAATCACA 0.345725160897  
AAATCACC 0.33888484145  
AAATCACG 0.36809233943  
AAATCACT 0.287816890154  
AAATCAGA 0.33548588613  
AAATCAGC 0.365456975579  
AAATCAGG 0.373276581264  
AAATCAGT 0.326538453094  
AAATCATA 0.352329551233  
AAATCATC 0.191162897116  
AAATCATG 0.32276128618  
AAATCATT 0.226622404951  
AAATCCAA 0.455704213178  
AAATCCAC 0.453146611342  
AAATCCAG 0.425585111792  
AAATCCAT 0.414079002804  
AAATCCCA 0.402492370853  
AAATCCCC 0.378367252849  
AAATCCCG 0.439604550143  
AAATCCCT 0.349426832407  
AAATCCGA 0.434680234473  
AAATCCGC 0.418085468397  
AAATCCGG 0.459702468293  
AAATCCGT 0.366706376302  
AAATCCTA 0.410598114277  
AAATCCTC 0.377529673267  
AAATCCTG 0.424649514041  
AAATCCTT 0.379056356811  
AAATCGAA 0.293230916156  
AAATCGAC 0.337142068485



AAATCGAG 0.336924149754  
AAATCGAT 0.289534347626  
AAATCGCA 0.3801853762  
AAATCGCC 0.339173071056  
AAATCGCG 0.425728336517  
AAATCGCT 0.330912498366  
AAATCGGA 0.310660584313  
AAATCGGC 0.310654460032  
AAATCGGG 0.340399227115  
AAATCGGT 0.340547411852  
AAATCGTA 0.356897127831  
AAATCGTC 0.374173724812  
AAATCGTG 0.385171762323  
AAATCGTT 0.188269775407  
AAATCTAA 0.450345129902  
AAATCTAC 0.454923989319  
AAATCTAG 0.463121754889  
AAATCTAT 0.435757558148  
AAATCTCA 0.455484752684  
AAATCTCC 0.446174073482  
AAATCTCG 0.464273807172  
AAATCTCT 0.407956266877  
AAATCTGA 0.468756265164  
AAATCTGC 0.453580404748  
AAATCTGG 0.46083274011  
AAATCTGT 0.450247700957  
AAATCTTA 0.412701756425  
AAATCTTC 0.430906825616  
AAATCTTG 0.423536921145  
AAATGAAA 0.208465059606  
AAATGAAC 0.0973704473145  
AAATGAAG -0.0223802536574  
AAATGAAT 0.267386150351  
AAATGACA -0.0944619586536  
AAATGACC -0.207700709043  
AAATGACG -0.0424433028167  
AAATGACT -0.0243851059811  
AAATGAGA 0.132944740829  
AAATGAGC -0.136898097841  
AAATGAGG 0.103276142177  
AAATGAGT 0.101757877762  
AAATGATA 0.213788996465  
AAATGATC -0.0120941184219  
AAATGATG 0.00863081516608  
AAATGATT 0.181510322084  
AAATGCAA 0.12713088199  
AAATGCAC -0.0675649761016  
AAATGCAG -0.15412654321  
AAATGCAT 0.0851587423333  
AAATGCCA -0.151506392473  
AAATGCCC -0.0449653509218  
AAATGCCG -0.0683988784449  
AAATGCCT -0.0883892824145  
AAATGCGA 0.220750221551

AAATGCGC 0.0823863553819  
AAATGCGG 0.00337274144328  
AAATGCGT 0.0756026476981  
AAATGCTA 0.0278974859231  
AAATGCTC -0.0985239637964  
AAATGCTG 0.0149056411895  
AAATGCTT -0.0578225560414  
AAATGGAA -0.0193112219698  
AAATGGAC -0.112030844146  
AAATGGAG -0.141101618187  
AAATGGAT 0.187112286258  
AAATGGCA -0.0427460979947  
AAATGGCC -0.10847458612  
AAATGGCG -0.0027530399663  
AAATGGCT -0.301396147377  
AAATGGGA -0.0598334924869  
AAATGGGC -0.121382716049  
AAATGGGG 0.0496394349501  
AAATGGGT 0.0287260470995  
AAATGGTA 0.143743550901  
AAATGGTC -0.191927293905  
AAATGGTG -0.129578520464  
AAATGGTT -0.0709993752996  
AAATGTAA 0.127431447452  
AAATGTAC -0.0625906178722  
AAATGTAG 0.0593042657358  
AAATGTAT 0.0209216509523  
AAATGTCA 0.216670782909  
AAATGTCC -0.181129000395  
AAATGTCC -0.217869012481  
AAATGTCT 0.0020295497799  
AAATGTGA 0.0680503413906  
AAATGTGC -0.0990032712024  
AAATGTGG 0.0423503261517  
AAATGTGT -0.0626029111506  
AAATGTTA 0.0373701567562  
AAATGTTC -0.0334634001778  
AAATGTTG 0.0279973215658  
AAATTAAG 0.104576293348  
AAATTAAC 0.208904147182  
AAATTAAG 0.19388229483  
AAATTAAT 0.0113476695427  
AAATTACA 0.319918131977  
AAATTACC 0.216798628565  
AAATTACG 0.31194194645  
AAATTACT 0.211173419726  
AAATTAGA 0.201137535775  
AAATTAGC 0.0183338684185  
AAATTAGG -0.00814049688827  
AAATTAGT 0.115178216251  
AAATTATA 0.260274868159  
AAATTATC 0.0376955820609  
AAATTATG 0.101130101649  
AAATTATT 0.235981508878

AAATTCAA 0.175885361281  
AAATTCAC 0.118863751125  
AAATTCAG 0.208418926968  
AAATTCAT -0.00266368881251  
AAATTCCA 0.143749364404  
AAATTCCC 0.335399789238  
AAATTCCG 0.119615591359  
AAATTCCT 0.23785538913  
AAATTCGA 0.178012000058  
AAATTCGC 0.265914604913  
AAATTCGG 0.176378734989  
AAATTCGT 0.23285197507  
AAATTCTA 0.306620342927  
AAATTCTC 0.278902939691  
AAATTCTG 0.280799907021  
AAATTCTT 0.11193877803  
AAATTGAA 0.109977716306  
AAATTGAC -0.0565208548225  
AAATTGAG 0.00405332718611  
AAATTGAT 0.0953801229062  
AAATTGCA 0.0699795156393  
AAATTGCC 0.204922171727  
AAATTGCG 0.301720105182  
AAATTGCT 0.211615068354  
AAATTGGA -0.0411013414125  
AAATTGGC -0.0794517164732  
AAATTGGG -0.0586215913879  
AAATTGGT 0.11760347723  
AAATTGTA 0.172694783026  
AAATTGTC 0.0809883598489  
AAATTGTG 0.149155305276  
AAATTGTT 0.114309996659  
AAATTTAA 0.210449616112  
AAATTTAC 0.172471575619  
AAATTTAG 0.144243013019  
AAATTTAT 0.181691532457  
AAATTTCA 0.262596324837  
AAATTTCC 0.27794533263  
AAATTTCG 0.281899712398  
AAATTTCT 0.15777344136  
AAATTTGA 0.103081297065  
AAATTTGC 0.249120640253  
AAATTTGG 0.189079343125  
AAATTTGT 0.18795711058  
AAATTTTA 0.255343146941  
AAATTTTC 0.26803428515  
AAATTTTG 0.275967922363  
AACAAAAA 0.114211020314  
AACAAAAC -0.124047651388  
AACAAAAG 0.0380322038921  
AACAAAAT 0.311267851176  
AACAAACA 0.103730323388  
AACAAACC -0.144115613251  
AACAAACG 0.0993020226218

AACAAACT -0.0389740386152  
AACAAAGA 0.0308579472488  
AACAAAGC 0.104074732705  
AACAAAGG -0.116028728986  
AACAAAGT -0.00965121703576  
AACAAATA 0.193202388389  
AACAAATC 0.271644414743  
AACAAATG 0.0164878307511  
AACAAATT 0.0859224499877  
AACAACAA 0.0636144176627  
AACAACAC -0.0845771650226  
AACAACAG -0.0487030450723  
AACAACAT -0.00660787224694  
AACAACCA -0.172788670486  
AACAACCC -0.0819282078695  
AACAACCG -0.169561706466  
AACAACCT -0.126159865233  
AACAACGA 0.0806517222844  
AACAACGC 0.029231082683  
AACAACGG -0.150667379468  
AACAACGT 0.112950183778  
AACAACTA -0.00979326776401  
AACAACTC -0.177820509655  
AACAACTG -0.0862542594696  
AACAACTT -0.0609423451607  
AACAAAGAA 0.15274214403  
AACAAAGAC -0.195973366877  
AACAAAGAG -0.136546114742  
AACAAAGAT 0.251369404378  
AACAAAGCA -0.0363793529266  
AACAAAGCC -0.187163237311  
AACAAAGCG -0.124895035811  
AACAAAGCT -0.263248285322  
AACAAAGGA 0.0979719030116  
AACAAAGGC -0.0531271337876  
AACAAAGGG -0.0117321649592  
AACAAAGGT -0.0737625848067  
AACAAAGTA 0.0146792465257  
AACAAAGTC -0.110705963705  
AACAAAGTG -0.14411882716  
AACAAAGTT -0.0495154940218  
AACAAATAA 0.0320209783098  
AACAAATAC 0.205929328855  
AACAAATAG 0.154038034082  
AACAAATAT 0.209957957365  
AACAAATCA 0.128675199396  
AACAAATCC 0.275400079028  
AACAAATCG 0.10061555369  
AACAAATCT 0.269089332367  
AACAAATGA -0.0764572238734  
AACAAATGC -0.096712948033  
AACAAATGG -0.084909854285  
AACAAATGT 0.0392736393774  
AACAAATTA 0.171744657359

AACAATTC 0.0989072207952  
AACAATTG 0.0328171080732  
AACACAAA 0.110332253425  
AACACAAC -0.147372580008  
AACACAAG 0.110732398077  
AACACAAT 0.179528714425  
AACACACA -0.0935998877082  
AACACACC 0.0233013234931  
AACACACG -0.0491697296355  
AACACACT 0.00223111374564  
AACACAGA 0.11925820464  
AACACAGC -0.112219642965  
AACACAGG -0.0403247052625  
AACACAGT -0.0610167072823  
AACACATA -0.0316058834829  
AACACATC -0.152150829712  
AACACATG -0.137374186396  
AACACATT 0.0496580605502  
AACACCAA -0.127119776641  
AACACCAC -0.113694403528  
AACACCAG -0.220239616985  
AACACCAT -0.146039215686  
AACACCCA -0.0703842734367  
AACACCCC -0.18238722367  
AACACCCG -0.203496092893  
AACACCCCT -0.203261905315  
AACACCGA 0.136758531518  
AACACCGC -0.0533504963698  
AACACCGG -0.10371083782  
AACACCGT -0.0902009210698  
AACACCTA -0.0771156276786  
AACACCTC -0.046463104855  
AACACCTG -0.000306539014717  
AACACCTT -0.0207743309403  
AACACGAA 0.0757155819946  
AACACGAC -0.155861435843  
AACACGAG 0.0740697889069  
AACACGAT 0.252981854634  
AACACGCA -0.0230950270946  
AACACGCC -0.234884796939  
AACACGCG -0.137491972534  
AACACGCT -0.0175976639112  
AACACGGA 0.151013322098  
AACACGGC -0.31246057215  
AACACGGG 0.136624843575  
AACACGGT -0.278562091503  
AACACGTA 0.104511075984  
AACACGTC -0.094846768337  
AACACGTG -0.00515292380328  
AACACGTT -0.282431670811  
AACACTAA 0.0580172301077  
AACACTAC 0.00330500938642  
AACACTAG -0.251440258094  
AACACTAT 0.0999280994094

AACACTCA -0.0825987413636  
AACACTCC -0.185429953656  
AACACTCG -0.116663546834  
AACACTCT -0.0403469266195  
AACACTGA -0.082084678039  
AACACTGC -0.0642090276466  
AACACTGG -0.210013275892  
AACACTGT 0.0146574384388  
AACACTTA -0.00965379977627  
AACACTTC -0.258082461589  
AACACTTG -0.000852704394841  
AACAGAAA 0.180670608574  
AACAGAAC -0.0940429050198  
AACAGAAG -0.0149390553949  
AACAGAAT 0.226006608268  
AACAGACA -0.127080657908  
AACAGACC -0.17099695398  
AACAGACG 0.00076565896068  
AACAGACT -0.280664426158  
AACAGAGA -0.0397841839492  
AACAGAGC -0.166807096246  
AACAGAGG -0.248393451979  
AACAGAGT -0.0558217523985  
AACAGATA 0.274288495344  
AACAGATC 0.285928340908  
AACAGATG -0.077750080622  
AACAGATT 0.422095506516  
AACAGCAA 0.0264847887639  
AACAGCAC -0.238851851852  
AACAGCAG -0.0635409463598  
AACAGCAT 0.0657097613064  
AACAGCCA -0.226372263389  
AACAGCCC -0.315150223737  
AACAGCCG -0.260037993766  
AACAGCCT -0.180323702243  
AACAGCGA -0.184690311504  
AACAGCGC -0.157047060889  
AACAGCGG -0.12197794735  
AACAGCGT -0.141867059463  
AACAGCTA -0.121042846768  
AACAGCTC -0.100005865356  
AACAGCTG -0.0940295476747  
AACAGCTT -0.022923597693  
AACAGGAA 0.156265843683  
AACAGGAC -0.100178966238  
AACAGGAG -0.263249345711  
AACAGGAT 0.254050582889  
AACAGGCA -0.0835807799362  
AACAGGCC -0.215400657597  
AACAGGCG -0.0777558244834  
AACAGGCT -0.258137340421  
AACAGGGA -0.0510234857014  
AACAGGGC -0.265557050021  
AACAGGGG -0.197084456412

AACAGGGT -0.0348014598941  
AACAGGTA 0.0853050135836  
AACAGGTC -0.0986306632639  
AACAGGTG -0.0906132349874  
AACAGGTT -0.14527523602  
AACAGTAA 0.168626966717  
AACAGTAC 0.0645170194529  
AACAGTAG -0.0267415338573  
AACAGTAT 0.119777602143  
AACAGTCA -0.0577893032573  
AACAGTCC -0.24415308292  
AACAGTCG -0.0971976898227  
AACAGTCT -0.218781213299  
AACAGTGA -0.262054144847  
AACAGTGC -0.114057638169  
AACAGTGG -0.0198814522104  
AACAGTGT -0.0453052454806  
AACAGTTA 0.028515993765  
AACAGTTC -0.138198983297  
AACAGTTG -0.0191812066887  
AACATAAA 0.028845309447  
AACATAAC 0.0478440800018  
AACATAAG 0.0672598898784  
AACATAAT 0.173848492832  
AACATACA 0.239353694714  
AACATACC 0.0137884444961  
AACATACG -0.190288088562  
AACATACT -0.139301299894  
AACATAGA 0.14000581791  
AACATAGC -0.12961542596  
AACATAGG 0.0188267255532  
AACATAGT -0.0606845553731  
AACATATA 0.129599442359  
AACATATC 0.255941403763  
AACATATG 0.00519867816555  
AACATATT 0.194934115904  
AACATCAA 0.0855534698896  
AACATCAC -0.00225032382709  
AACATCAG 0.167325265498  
AACATCAT -0.0459313047487  
AACATCCA 0.132528002557  
AACATCCC -0.0467987738439  
AACATCCG 0.0403948687403  
AACATCCT -0.00602647698083  
AACATCGA 0.11964464719  
AACATCGC -0.00926445164383  
AACATCGG 0.0668181518804  
AACATCGT -0.0455726177851  
AACATCTA 0.058775587291  
AACATCTC -0.152140688333  
AACATCTG 0.071886869086  
AACATCTT 0.0462161058924  
AACATGAA -0.0151512656699  
AACATGAC 0.01766778634

AACATGAG -0.0116455769762  
AACATGAT 0.0733326920027  
AACATGCA -0.0522717631951  
AACATGCC -0.113668255864  
AACATGCG -0.0805176842521  
AACATGCT -0.180920474999  
AACATGGA 0.20945912571  
AACATGGC -0.25218115102  
AACATGGG -0.118209205847  
AACATGGT -0.148542791606  
AACATGTA -0.0491290514724  
AACATGTC -0.222202694105  
AACATGTG -0.184241871383  
AACATGTT 0.00861685842674  
AACATTAA 0.101650371188  
AACATTAC 0.121942963404  
AACATTAG 0.0704735559507  
AACATTAT -0.00730027748318  
AACATTCA -0.0142703462206  
AACATTCC -0.11054035365  
AACATTCT -0.0858358852778  
AACATTCT 0.114094162331  
AACATTGA 0.0685296296834  
AACATTGC 0.0357123011953  
AACATTGG -0.0168297293151  
AACATTGT -0.0896534501306  
AACATTTA 0.0436142547906  
AACATTTT 0.0886275478332  
AACATTTG 0.0426541208527  
AACCAAAA 0.192608509517  
AACCAAAC -0.0347074738096  
AACCAAAG -0.0487290782367  
AACCAAAT 0.271007596215  
AACCAACA 0.04657794953  
AACCAACC -0.1337396307  
AACCAACG -0.0154586269731  
AACCAACT -0.0994212364389  
AACCAAGA 0.12416161716  
AACCAAGC -0.149444115194  
AACCAAGG -0.190858710562  
AACCAAGT 0.0302394125008  
AACCAATA -0.0894585445934  
AACCAATC 0.0782284154895  
AACCAATG -0.0347725654846  
AACCAATT -0.045459300045  
AACCACAA 0.0227318292098  
AACCACAC -0.123265946705  
AACCACAG -0.131282823793  
AACCACAT -0.153511155018  
AACCACCA -0.0790898738002  
AACCACCC -0.0905711521533  
AACCACCG -0.117380591773  
AACCACCT -0.299551159267  
AACCACGA 0.0328464949834



AACCACGC -0.0120828672294  
AACCACGG 0.0560879229439  
AACCACGT -0.0918440283004  
AACCACCTA -0.0327648075778  
AACCACCTC -0.0848920942282  
AACCACCTG -0.0268565604884  
AACCACCTT -0.146329702251  
AACCAGAA 0.146506762745  
AACCAGAC -0.042723831272  
AACCAGAG -0.112732265047  
AACCAGAT 0.29876753606  
AACCAGCA 0.00800052300495  
AACCAGCC -0.0857907732294  
AACCAGCG -0.132640551282  
AACCAGCT -0.216720177822  
AACCAGGA -0.0468496202643  
AACCAGGC -0.224959547748  
AACCAGGG -0.0280580304619  
AACCAGGT -0.196717954378  
AACCAGTA 0.0276680058838  
AACCAGTC -0.221065335917  
AACCAGTG -0.178647892561  
AACCAGTT -0.226035477169  
AACCATAA 0.0821971942304  
AACCATAC 0.0255439197348  
AACCATAG -0.187535668818  
AACCATAT 0.222763790624  
AACCATCA -0.139067268217  
AACCATCC -0.17575450349  
AACCATCG -0.0432616319273  
AACCATCT -0.0141735956752  
AACCATGA 0.096805089025  
AACCATGC -0.201972403776  
AACCATGG -0.248356400035  
AACCATGT -0.159867828613  
AACCATTA -0.0462844856392  
AACCATTC -0.0969938965759  
AACCATTG -0.206632037055  
AACCCAAA -0.00167652143594  
AACCCAAC 0.0925907631514  
AACCCAAG -0.0306639473096  
AACCCAAT 0.0167786339986  
AACCCACA -0.158288740704  
AACCCACC -0.136825988516  
AACCCACG -0.0874682580728  
AACCCACT -0.164280214432  
AACCCAGA 0.102337592483  
AACCCAGC -0.113885781529  
AACCCAGG -0.0481692825308  
AACCCAGT -0.171304300102  
AACCCATA -0.0336107817954  
AACCCATC -0.300971339106  
AACCCATG -0.139377373817  
AACCCATT 0.00163729606439

AACCCCAA -0.112065985084  
AACCCAC -0.0484670568479  
AACCCAG -0.23965969955  
AACCCAT -0.141755568726  
AACCCCA -0.332134030826  
AACCCCC -0.339296784564  
AACCCCG -0.136959838432  
AACCCCT -0.318948633124  
AACCCCGA -0.0811703590845  
AACCCCGC -0.139823898348  
AACCCCGG -0.363041350446  
AACCCCGT -0.175133895254  
AACCCCTA -0.128157699757  
AACCCCTC -0.146587105624  
AACCCCTG -0.114427430641  
AACCCCTT -0.16111220883  
AACCCGAA -0.0321309604166  
AACCCGAC -0.17500308642  
AACCCGAG -0.0767698632923  
AACCCGAT 0.134785640608  
AACCCGCA -0.0580624711849  
AACCCGCC -0.104185462421  
AACCCGCG 0.0586099690555  
AACCCGCT -0.219334785766  
AACCCGGA 0.183641213079  
AACCCGGC -0.245170707021  
AACCCGGG -0.144962491014  
AACCCGGT -0.17044649185  
AACCCGTA -0.0100496168961  
AACCCGTC -0.282932784636  
AACCCGTG -0.17501042627  
AACCCGTT -0.111825723127  
AACCCCTAA -0.0981229933317  
AACCCCTAC -0.0879302530969  
AACCCCTAG -0.0618152978111  
AACCCCTAT -0.0940607916749  
AACCCCTCA -0.211714677641  
AACCCCTCC -0.149940592564  
AACCCCTCG -0.216091517811  
AACCCCTCT -0.19871534153  
AACCCCTGA -0.0389039817788  
AACCCCTGC -0.18686223193  
AACCCCTGG -0.228233493012  
AACCCCTGT -0.15066003941  
AACCCCTTA -0.242544213432  
AACCCCTTC -0.243580246914  
AACCCCTTG -0.169979986464  
AACCGAAA 0.0091772841515  
AACCGAAC -0.0222059186727  
AACCGAAG -0.0491104498988  
AACCGAAT 0.263903941423  
AACCGACA 0.0860015558629  
AACCGACC -0.0521050322633  
AACCGACG -0.00656887440115

AACCGACT -0.057566988864  
AACCGAGA -0.0519267600687  
AACCGAGC -0.131223395755  
AACCGAGG -0.101962818021  
AACCGAGT -0.255980096843  
AACCGATA 0.0746859863189  
AACCGATC -0.0594671160635  
AACCGATG -0.257870073145  
AACCGATT 0.213974401813  
AACCGCAA 0.0840919326486  
AACCGCAC -0.0721442995742  
AACCGCAG 0.00719806976811  
AACCGCAT -0.207253033072  
AACCGCCA -0.2512389252  
AACCGCCC -0.0827214759208  
AACCGCCG -0.122595603984  
AACCGCCT -0.10898184459  
AACCGCGA 0.0020295497799  
AACCGCGC 0.043070910755  
AACCGCGG 0.000996179938089  
AACCGCGT 0.0129661644851  
AACCGCTA -0.29643718228  
AACCGCTC -0.0803987422005  
AACCGCTG -0.279277989036  
AACCGCTT -0.020387023666  
AACCGGAA -0.101073163363  
AACCGGAC -0.147323205471  
AACCGGAG -0.173421781177  
AACCGGAT 0.293157351852  
AACCGGCA -0.133378884169  
AACCGGCC -0.11473066052  
AACCGGCG -0.0435849305144  
AACCGGCT -0.132018105805  
AACCGGGA -0.171072702332  
AACCGGGC -0.282566942763  
AACCGGGG -0.135287888016  
AACCGGGT -0.0128139696965  
AACCGGTA -0.17155676533  
AACCGGTC -0.229905591866  
AACCGGTG -0.293407407407  
AACCGGTT 0.0405120481928  
AACCGTAA 0.00792827504446  
AACCGTAC -0.108336900567  
AACCGTAG -0.175495634901  
AACCGTAT 0.246602646986  
AACCGTCA -0.186228829837  
AACCGTCC -0.179211735072  
AACCGTCG 0.0461348481106  
AACCGTCT -0.150617459686  
AACCGTGA -0.0332340186566  
AACCGTGC -0.177899051758  
AACCGTGG -0.117679552266  
AACCGTGT -0.100816888561  
AACCGTTA 0.0566082622453

AACCGTTC -0.168641975309  
AACCGTTG -0.154138680363  
AACCTAAA 0.0139626345945  
AACCTAAC -0.0956113196777  
AACCTAAG -0.244358303294  
AACCTAAT 0.0483351447485  
AACCTACA -0.178710460873  
AACCTACC -0.162837274557  
AACCTACG -0.090919787681  
AACCTACT -0.123802536574  
AACCTAGA -0.0607496455714  
AACCTAGC -0.233382716049  
AACCTAGG 0.0765450971828  
AACCTAGT -0.119724242917  
AACCTATA -0.0406485323498  
AACCTATC -0.0136967880744  
AACCTATG -0.0114956887536  
AACCTATT 0.106813592318  
AACCTCAA -0.0444626850493  
AACCTCAC -0.143622334178  
AACCTCAG -0.150980585824  
AACCTCAT -0.129929742678  
AACCTCCA -0.332180443267  
AACCTCCC -0.301087947769  
AACCTCCG -0.278144249513  
AACCTCCT -0.196992592593  
AACCTCGA -0.0423939054644  
AACCTCGC -0.103577398081  
AACCTCGG -0.170200649656  
AACCTCGT -0.329583888807  
AACCTCTA -0.156848218618  
AACCTCTC -0.317959881958  
AACCTCTG -0.173866761932  
AACCTCTT -0.166949273454  
AACCTGAA -0.0871573760394  
AACCTGAC -0.250921614139  
AACCTGAG -0.196942756952  
AACCTGAT 0.241070056423  
AACCTGCA -0.2310048717  
AACCTGCC -0.263396987432  
AACCTGCG -0.23073018695  
AACCTGCT -0.071704514435  
AACCTGGA -0.188672229065  
AACCTGGC -0.176381985458  
AACCTGGG -0.180230452675  
AACCTGGT -0.184442326911  
AACCTGTA -0.0954384289447  
AACCTGTC -0.16226213956  
AACCTGTG -0.018870720743  
AACCTTAA -0.183254789617  
AACCTTAC -0.0965423561373  
AACCTTAG 0.0126116833496  
AACCTTAT -0.025182688536  
AACCTTCA -0.0388723432075

AACCTTCC -0.285898491084  
AACCTTCG -0.148511094013  
AACCTTCT -0.249756753538  
AACCTTGA -0.0510082548464  
AACCTTGC -0.139493432578  
AACCTTGG -0.171489711934  
AACCTTGT -0.0915113394367  
AACCTTTA 0.0762817253352  
AACCTTTC -0.258423328504  
AACCTTTG 0.070528670841  
AACGAAAA -0.00554896924192  
AACGAAAC 0.0448421910501  
AACGAAAG 0.113405343696  
AACGAAAT 0.379243967283  
AACGAACA -0.0992271149013  
AACGAACC -0.088769921404  
AACGAACG -0.0687998233667  
AACGAACT -0.0830649145341  
AACGAAGA 0.106941437973  
AACGAAGC -0.0527645344699  
AACGAAGG -0.166496264712  
AACGAAGT -0.144536901988  
AACGAATA 0.0998692487615  
AACGAATC 0.40752400738  
AACGAATG -0.101781122427  
AACGAATT 0.200863456373  
AACGACAA 0.123495581319  
AACGACAC 0.0698313309023  
AACGACAG -0.0643785199091  
AACGACAT 0.0211914641375  
AACGACCA -0.142310117112  
AACGACCC -0.235172125338  
AACGACCG -0.0923218352954  
AACGACCT -0.18593946542  
AACGACGA -0.0410498059358  
AACGACGC -0.276653458747  
AACGACGG 0.0536634559974  
AACGACGT -0.0235702010052  
AACGACTA 0.07634635228  
AACGACTC -0.00755467742378  
AACGACTG -0.0978372976098  
AACGACTT -0.0734922830359  
AACGAGAA 0.139373556288  
AACGAGAC -0.119910768674  
AACGAGAG 0.04187671611  
AACGAGAT 0.335435465104  
AACGAGCA -0.140031606499  
AACGAGCC -0.226419177191  
AACGAGCG -0.293590155031  
AACGAGCT -0.20956330527  
AACGAGGA 0.0131962445758  
AACGAGGC -0.114998628258  
AACGAGGG -0.164912724669  
AACGAGGT -0.108968344116

AACGAGTA -0.118552542764  
AACGAGTC -0.0845096199377  
AACGAGTG 0.158322435046  
AACGAGTT -0.113664957215  
AACGATAA 0.09306146761  
AACGATAC 0.0804308979705  
AACGATAG -0.133436508721  
AACGATAT 0.300540438452  
AACGATCA 0.0955864193047  
AACGATCC 0.189836769194  
AACGATCG 0.0505320877652  
AACGATCT 0.161551296406  
AACGATGA 0.0501794770467  
AACGATGC -0.286572631126  
AACGATGG 0.114195701333  
AACGATGT 0.0305536588555  
AACGATTA 0.0150378452196  
AACGATTC 0.168013888687  
AACGATTG 0.0318321154098  
AACGCAAA 0.150019612686  
AACGCAAC 0.0869713654788  
AACGCAAG 0.0302077330479  
AACGCAAT 0.356144581814  
AACGCACA 0.00574187493826  
AACGCACC -0.213859256333  
AACGCACG -0.187406495019  
AACGCACT -0.0699768381304  
AACGCAGA -0.0137544183187  
AACGCAGC -0.0367488858153  
AACGCAGG -0.161822091148  
AACGCAGT -0.233568712656  
AACGCATA -0.121796026521  
AACGCATC -0.0698286460735  
AACGCATG -0.134062623469  
AACGCATT 0.052769747069  
AACGCCAA -0.137387570595  
AACGCCAC -0.185620527679  
AACGCCAG -0.221196159122  
AACGCCAT 0.160168170542  
AACGCCCA -0.163139701105  
AACGCCCC -0.294945309738  
AACGCCCG -0.410820904191  
AACGCCCT -0.112249882007  
AACGCCGA -0.0273591836231  
AACGCCGC -0.301085048011  
AACGCCGG -0.148570166631  
AACGCCGT -0.0939681285394  
AACGCCTA -0.108208218096  
AACGCCTC -0.116061578991  
AACGCCTG -0.0830295177975  
AACGCCTT -0.267311546841  
AACGCGAA -0.0325583557536  
AACGCGAC -0.0779948302545  
AACGCGAG -0.0645589470045

AACGCGAT 0.304213594151  
AACGCGCA 0.0762613862537  
AACGCGCC -0.209479480468  
AACGCGCG 0.103163666713  
AACGCGCT -0.0544550923182  
AACGCGGA 0.0694471887418  
AACGCGGC -0.198794830756  
AACGCGGG -0.219185980649  
AACGCGGT -0.191219315241  
AACGCGTA 0.0282931152209  
AACGCGTC -0.183944444444  
AACGCGTG -0.0533191741579  
AACGCGTT -0.0579004542761  
AACGCTAA 0.00233253752641  
AACGCTAC -0.0384146743068  
AACGCTAG -0.252765748575  
AACGCTAT 0.0198819229361  
AACGCTCA -0.0148424380124  
AACGCTCC -0.125141303393  
AACGCTCG -0.282993110339  
AACGCTCT -0.121990637845  
AACGCTGA -0.0831040344021  
AACGCTGC -0.0574707912832  
AACGCTGG -0.113418818068  
AACGCTGT -0.167006909117  
AACGCTTA -0.0547789577673  
AACGCTTC -0.165785437051  
AACGCTTG 0.158403587345  
AACGAAA 0.0454419472572  
AACGGAAC -0.232691100937  
AACGGAAG -0.182769766013  
AACGGAAT 0.330142713401  
AACGGACA -0.0655833684425  
AACGGACC -0.196735834369  
AACGGACG -0.307653768069  
AACGGACT -0.197775273262  
AACGGAGA 0.201927854372  
AACGGAGC -0.077385362641  
AACGGAGG 0.0293007123492  
AACGGAGT -0.173150480455  
AACGGATA 0.2344093676  
AACGGATC 0.239261564469  
AACGGATG -0.112924500071  
AACGGATT 0.378979559223  
AACGGCAA 0.0516685310825  
AACGGCAC 0.040096475198  
AACGGCAG -0.171392183003  
AACGGCAT -0.184065407255  
AACGGCCA -0.0858177819716  
AACGGCCC -0.245320078127  
AACGGCCG -0.127293779358  
AACGGCCT -0.274749419839  
AACGGCGA -0.0707068212255  
AACGGCGC -0.142901139513

AACGGCGG -0.141355524825  
AACGGCGT -0.10507180762  
AACGGCTA -0.0982751902888  
AACGGCTC -0.157582990398  
AACGGCTG -0.140045324598  
AACGGCTT -0.107257293752  
AACGGGAA 0.187766042451  
AACGGGAC -0.171333563797  
AACGGGAG -0.0866771198578  
AACGGGAT 0.166200136117  
AACGGGCA -0.236577011142  
AACGGGCC -0.360497083241  
AACGGGCG 0.0171035156464  
AACGGGCT -0.254106995885  
AACGGGGA 0.0932764807578  
AACGGGGC -0.191082860492  
AACGGGGG -0.160539558673  
AACGGGGT -0.222330514506  
AACGGGTA -0.114416210028  
AACGGGTC -0.450907311634  
AACGGGTG -0.205435025721  
AACGGTAA 0.134079583921  
AACGGTAC 0.189884212514  
AACGGTAG -0.165015005854  
AACGGTAT 0.071760638066  
AACGGTCA -0.275599054924  
AACGGTCC -0.159245908295  
AACGGTCG -0.218112279893  
AACGGTCT -0.182701449597  
AACGGTGA 0.162517289073  
AACGGTGC -0.326069304541  
AACGGTGG 0.00713721228885  
AACGGTGT 0.0179724841283  
AACGGTTA -0.260626361387  
AACGGTTC -0.107754835452  
AACGGTTG 0.011397149623  
AACGTAAC 0.184802347711  
AACGTAAC -0.0395900222277  
AACGTAAG -0.0413099080112  
AACGTAAT 0.371303008731  
AACGTACA -0.0453269765455  
AACGTACC -0.265777566087  
AACGTACG -0.138385506346  
AACGTACT -0.151492086364  
AACGTAGA 0.273529339129  
AACGTAGC -0.259550068587  
AACGTAGG -0.0347702474258  
AACGTAGT 0.0731945267734  
AACGTATA 0.199400645459  
AACGTATC 0.302600496855  
AACGTATG 0.0629491627976  
AACGTATT 0.118229818437  
AACGTCAA -0.072951927128  
AACGTCAC -0.259171566691



AACGTCAG -0.164363170401  
AACGTCAT -0.0313234099541  
AACGTCCA -0.185694447672  
AACGTCCC -0.0135937704299  
AACGTCCG -0.0866520641542  
AACGTCCT -0.202843563344  
AACGTCGA 0.0820133263079  
AACGTCGC -0.0670913660599  
AACGTCGG -0.0215533269807  
AACGTCGT -0.0744599247454  
AACGTCTA -0.204196097802  
AACGTCTC -0.19962962963  
AACGTCTG -0.379963354289  
AACGTCTT -0.130600148185  
AACGTGAA -0.0399111323732  
AACGTGAC -0.298349438381  
AACGTGAG -0.0316777837172  
AACGTGAT 0.21526542844  
AACGTGCA -0.00366829863583  
AACGTGCC -0.241238044618  
AACGTGCG -0.138551406998  
AACGTGCT -0.0533712027661  
AACGTGGA -0.00825040314965  
AACGTGGC -0.290819334993  
AACGTGGG -0.11096022693  
AACGTGGT -0.0438166112373  
AACGTGTA -0.0968737653102  
AACGTGTC -0.155947137844  
AACGTGTG 0.0150320340534  
AACGTTAA -0.0364077155985  
AACGTTAC 0.0183456277855  
AACGTTAG -0.0581544051461  
AACGTTAT 0.0820215592  
AACGTTCA -0.202044835911  
AACGTTCC 0.0947059022352  
AACGTTCCG -0.0203046147206  
AACGTTCT -0.190338211971  
AACGTTGA -0.0993796732495  
AACGTTGC -0.2352187488  
AACGTTGG -0.00113328284325  
AACGTTGT 0.0133290522295  
AACGTTTA -0.0103695287027  
AACGTTTC 0.0024036899045  
AACGTTTG -0.132613589689  
AACTAAAA 0.167804686706  
AACTAAAC -0.0546252387539  
AACTAAAG -0.228176171035  
AACTAAAT 0.121716327924  
AACTAACA 0.00941293991087  
AACTAACC -0.169630215022  
AACTAACG 0.16399097675  
AACTAACT -0.0200092978658  
AACTAAGA 0.049971670565  
AACTAAGC 0.0573460404167

AACTAAGG -0.0139453459823  
AACTAAGT -0.151345254561  
AACTAATA 0.0749916464487  
AACTAATC -0.123160402714  
AACTAATG -0.0860011387952  
AACTAATT 0.10864701524  
AACTACAA 0.104357395332  
AACTACAC 0.0668675492327  
AACTACAG -0.0919311957927  
AACTACAT 0.105322015851  
AACTACCA -0.147079316549  
AACTACCC -0.130195889823  
AACTACCG -0.0452266890557  
AACTACCT -0.12907480029  
AACTACGA -0.127678550677  
AACTACGC -0.213111133062  
AACTACGG -0.166378572369  
AACTACGT 0.045651386419  
AACTACTA 0.0959872884147  
AACTACTC -0.0205863831679  
AACTACTG 0.175501576279  
AACTACTT -0.0605098949587  
AACTAGAA 0.174040593646  
AACTAGAC -0.0110564535629  
AACTAGAG -0.111589815697  
AACTAGAT 0.266580435642  
AACTAGCA 0.0626269376607  
AACTAGCC -0.122246505655  
AACTAGCG -0.230429978766  
AACTAGCT -0.245636130629  
AACTAGGA -0.0298098295876  
AACTAGGC -0.0374367501948  
AACTAGGG -0.198138268678  
AACTAGGT -0.0299812589891  
AACTAGTA -0.124940320377  
AACTAGTC -0.04665384526  
AACTAGTG -0.125194149447  
AACTAGTT -0.196438511123  
AACTATAA -0.106249019414  
AACTATAC -0.0536869659703  
AACTATAG -0.0831851412764  
AACTATAT -0.0211134194354  
AACTATCA 0.0260906832479  
AACTATCC -0.143652989089  
AACTATCG -0.144756699209  
AACTATCT 0.125437773161  
AACTATGA 0.0218721490374  
AACTATGC -0.0588788996465  
AACTATGG -0.237496440837  
AACTATGT 0.043996344957  
AACTATTA 0.0202330277628  
AACTATTC -0.0126658468034  
AACTATTG 0.119100977923  
AACTCAA 0.01505795956

AACTCAAC 0.000729983095128  
AACTCAAG 0.0268617602097  
AACTCAAT 0.119280884322  
AACTCACA -0.0466999840193  
AACTCACC -0.177078703475  
AACTCACG -0.136561157474  
AACTCACT -0.129389972833  
AACTCAGA 0.123866459402  
AACTCAGC -0.0376737140223  
AACTCAGG 0.0999994800022  
AACTCAGT -0.1814037717  
AACTCATA 0.0524490109552  
AACTCATC -0.161133058985  
AACTCATG 0.0267328171081  
AACTCATT 0.0350035127006  
AACTCCAA -0.0824444670434  
AACTCCAC -0.271858215792  
AACTCCAG 0.00712594249851  
AACTCCAT -0.0142969215347  
AACTCCCA -0.155411549714  
AACTCCCC -0.219248564483  
AACTCCCG -0.0799499489611  
AACTCCCT -0.15805274279  
AACTCCGA -0.124297459878  
AACTCCGC -0.160830699328  
AACTCCGG -0.157003160806  
AACTCCGT -0.0955544578908  
AACTCCTA -0.0058128766176  
AACTCCTC -0.0151764596127  
AACTCCTG -0.236279509087  
AACTCCTT -0.170788060447  
AACTCGAA -0.144813530418  
AACTCGAC -0.133598340823  
AACTCGAG -0.118111730333  
AACTCGAT 0.0709785066632  
AACTCGCA 0.0367708401941  
AACTCGCC -0.0886457681627  
AACTCGCG -0.152142338417  
AACTCGCT -0.22322085048  
AACTCGGA -0.048708533667  
AACTCGGC -0.0426599147586  
AACTCGGG -0.0856689549585  
AACTCGGT -0.0951115005317  
AACTCGTA -0.0431689186905  
AACTCGTC -0.153246297119  
AACTCGTG -0.200605242509  
AACTCTAA 0.0645239192957  
AACTCTAC -0.075939473883  
AACTCTAG -0.144854889953  
AACTCTAT -0.00342059767844  
AACTCTCA 0.0395123932468  
AACTCTCC 0.0942858240576  
AACTCTCG -0.200424110385  
AACTCTCT -0.107817956779

AACTCTGA 0.0496055670972  
AACTCTGC -0.0964836601307  
AACTCTGG -0.0617722592791  
AACTCTGT -0.052810969332  
AACTCTTA -0.0549000694197  
AACTCTTC -0.211625555946  
AACTCTTG -0.188465315842  
AACTGAAA 0.0576535708797  
AACTGAAC -0.0915399051758  
AACTGAAG 0.0338924972834  
AACTGAAT 0.167060857438  
AACTGACA -0.172612926652  
AACTGACC -0.12043028457  
AACTGACG -0.169963828947  
AACTGACT -0.222518577058  
AACTGAGA -0.0580062130892  
AACTGAGC -0.226988125027  
AACTGAGG -0.0155523726423  
AACTGAGT -0.233899919834  
AACTGATA 0.255323754594  
AACTGATC 0.0330146877225  
AACTGATG 0.0337274144328  
AACTGATT 0.308896895384  
AACTGCAA 0.194989321982  
AACTGCAC 0.065824730811  
AACTGCAG -0.0725262903686  
AACTGCAT -0.0849030714176  
AACTGCCA -0.217239070543  
AACTGCCC -0.15452432825  
AACTGCCG -0.143689179375  
AACTGCCT -0.0805204285495  
AACTGCGA 0.125839350312  
AACTGCGC -0.186716049383  
AACTGCGG -0.011447431882  
AACTGCGT -0.00877077433094  
AACTGCTA -0.100592592593  
AACTGCTC -0.115585954862  
AACTGCTG -0.143084574802  
AACTGCTT -0.0203094721368  
AACTGGAA -0.0731730742845  
AACTGGAC 0.0274998910406  
AACTGGAG -0.0598997782608  
AACTGGAT 0.168379108213  
AACTGGCA -0.123740917318  
AACTGGCC -0.0487881182902  
AACTGGCG -0.17607986451  
AACTGGCT -0.22119742965  
AACTGGGA -0.190535189828  
AACTGGGC -0.286538148738  
AACTGGGG -0.151280864198  
AACTGGGT -0.117517766763  
AACTGGTA 0.0566457948949  
AACTGGTC -0.0285197947597  
AACTGGTG -0.136059734295

AACTGTAA 0.0169740287091  
AACTGTAC -0.228244764915  
AACTGTAG 0.0451919864019  
AACTGTAT 0.00277174032361  
AACTGTCA 0.0789970858441  
AACTGTCC -0.162646668203  
AACTGTCCG -0.172280389833  
AACTGTCT -0.120545683795  
AACTGTGA 0.147421095525  
AACTGTGC -0.177475308642  
AACTGTGG -0.092186496765  
AACTGTGT -0.0654899119629  
AACTGTTA 0.188515682885  
AACTGTTC -0.165908411434  
AACTGTTG -0.177344834587  
AACTTAAA 0.100129479456  
AACTTAAC 0.007685267241  
AACTTAAG 0.0025851281038  
AACTTAAT -0.0663271977104  
AACTTACA 0.0809718654636  
AACTTACC -0.0320451601572  
AACTTACG 0.0118273373398  
AACTTACT -0.0344172772427  
AACTTAGA 0.203524472273  
AACTTAGC -0.0344587625122  
AACTTAGG -0.124520505095  
AACTTAGT -0.206939776256  
AACTTATA 0.123896792465  
AACTTATC 0.0489837723185  
AACTTATG -0.0206508375596  
AACTTATT -0.0747665859803  
AACTTCAA 0.0620869832488  
AACTTCAC -0.18485776373  
AACTTCAG -0.0574957737821  
AACTTCAT -0.0302638728917  
AACTTCCA -0.160309699793  
AACTTCCC -0.0549555097855  
AACTTCCG 0.015103866524  
AACTTCCT -0.0016381027642  
AACTTCGA -0.0616201531242  
AACTTCGC -0.0606932721224  
AACTTCGG -0.177143097844  
AACTTCGT 0.122878561155  
AACTTCTA -0.0876249903959  
AACTTCTC 0.0642438946436  
AACTTCTG -0.00291444378581  
AACTTCTT -0.100601455697  
AACTTGAA 0.0648214462116  
AACTTGAC -0.0052800281016  
AACTTGAG -0.122715823785  
AACTTGAT 0.100040615601  
AACTTGCA -0.0725865966262  
AACTTGCC 0.0286650298549  
AACTTGCG -0.0110457968342

AACTTGCT -0.104601635181  
AACTTGGA 0.140638891633  
AACTTGGC -0.18246887778  
AACTTGGG -0.231539554765  
AACTTGGT -0.236909386179  
AACTTGTA 0.0113065050824  
AACTTGTC -0.193794610046  
AACTTGTG -0.172662364033  
AACTTTAA 0.0240480583441  
AACTTTAC -0.0343192945244  
AACTTTAG -0.0441496037372  
AACTTTAT 0.115512964061  
AACTTTCA 0.0033574012465  
AACTTTCC 0.0658448709195  
AACTTTCG 0.130015203407  
AACTTTCT -0.0926959509149  
AACTTTGA -0.0291386533869  
AACTTTGC -0.130505716735  
AACTTTGG 0.0923113021142  
AACTTTGT -0.0692612445863  
AACTTTTA -0.107985496762  
AACTTTTC -0.00723718328641  
AACTTTTG -0.223635802469  
AAGAAAAA 0.190039847198  
AAGAAAAC -0.172952100923  
AAGAAAAG -0.0339701573253  
AAGAAAAT 0.355906324002  
AAGAAACA 0.160313618301  
AAGAAACC -0.0284171990604  
AAGAAACG 0.0471053021577  
AAGAAACT 0.0131325868291  
AAGAAAGA 0.0821479549786  
AAGAAAGC -0.2310781893  
AAGAAAGG -0.111194714946  
AAGAAAGT 0.0941016663519  
AAGAAATA 0.160441939186  
AAGAAATC 0.447369233429  
AAGAAATG -0.0560358075918  
AAGAAATT 0.151295163657  
AAGAACAA -0.179040576468  
AAGAACAC -0.0212480243011  
AAGAACAG -0.169287564917  
AAGAACAT -0.0851815263028  
AAGAACCA -0.0732344435115  
AAGAACCC -0.170993141289  
AAGAACCG -0.109118562227  
AAGAACCT -0.066051167318  
AAGAACGA -0.0585431406447  
AAGAACGC -0.129155252402  
AAGAACGG -0.16382441701  
AAGAACGT 0.062120295367  
AAGAACTA -0.04888482773  
AAGAACTC -0.121183933971  
AAGAACTG -0.0594079781367

AAGAACTT -0.108594714744  
AAGAAGAA -0.297246086999  
AAGAAGAC 0.0383611605085  
AAGAAGAG -0.12253562098  
AAGAAGAT 0.338269434719  
AAGAAGCA -0.100344568113  
AAGAAGCC -0.301335908345  
AAGAAGCG -0.127484877187  
AAGAAGCT -0.181634377452  
AAGAAGGA -0.212407003396  
AAGAAGGC -0.350773304039  
AAGAAGGG -0.129617741785  
AAGAAGGT -0.200287581699  
AAGAAGTA 0.0435209424084  
AAGAAGTC -0.118929747036  
AAGAAGTG 0.166805166127  
AAGAATAA 0.193588223671  
AAGAATAC 0.151835602109  
AAGAATAG -0.059994421556  
AAGAATAT 0.33628556258  
AAGAATCA 0.32641432906  
AAGAATCC 0.443728182836  
AAGAATCG 0.351470423824  
AAGAATCT 0.459592056136  
AAGAATGA 0.0255618671277  
AAGAATGC 0.0221804828021  
AAGAATGG -0.0670788601287  
AAGAATGT 0.108734549606  
AAGAATTA 0.106948012031  
AAGAATTC 0.234203636004  
AAGAATTG 0.0222836944829  
AAGACAAA -0.153838977517  
AAGACAAC -0.198343663572  
AAGACAAG -0.133836263664  
AAGACAAT 0.196963709412  
AAGACACA 0.0065695233391  
AAGACACC -0.0801737431609  
AAGACACG -0.00398500719132  
AAGACACT -0.178220683365  
AAGACAGA 0.00943878662851  
AAGACAGC -0.166661178343  
AAGACAGG -0.123122085048  
AAGACAGT -0.0395460831769  
AAGACATA -0.0936388779139  
AAGACATC -0.136049569247  
AAGACATG -0.0499818876375  
AAGACATT 0.0690300555446  
AAGACCAA -0.231220244752  
AAGACCAC -0.214935477968  
AAGACCAG -0.258696308861  
AAGACCAT -0.0295586508172  
AAGACCCA -0.240000987557  
AAGACCCC -0.286256792748  
AAGACCCG -0.443928771272

AAGACCCT -0.209185185185  
AAGACCGA -0.21530527178  
AAGACCGC -0.249084105416  
AAGACCGG -0.0754928758041  
AAGACCGT -0.0335888274166  
AAGACCTA -0.213684822077  
AAGACCTC -0.19712920892  
AAGACCTG -0.130826939752  
AAGACCTT -0.311436456064  
AAGACGAA 0.241394389319  
AAGACGAC -0.150794826631  
AAGACGAG -0.0498069430765  
AAGACGAT 0.228361215394  
AAGACGCA -0.0671045916267  
AAGACGCC -0.169375103491  
AAGACGCG -0.0690321544997  
AAGACGCT -0.170342935528  
AAGACGGA -0.0924553980562  
AAGACGGC -0.236532194351  
AAGACGGG -0.0708417707973  
AAGACGGT -0.135657933725  
AAGACGTA -0.152331415059  
AAGACGTC -0.0439489154146  
AAGACGTG -0.0765079051492  
AAGACTAA -0.0491098937384  
AAGACTAC 0.0369604695422  
AAGACTAG -0.101899782135  
AAGACTAT -0.0654090334578  
AAGACTCA -0.186768031189  
AAGACTCC 0.0140857824977  
AAGACTCG -0.0902517687737  
AAGACTCT -0.127880016968  
AAGACTGA 0.186455794858  
AAGACTGC -0.0228734039317  
AAGACTGG -0.17778600823  
AAGACTGT -0.0165981433324  
AAGACTTA -0.0443101419377  
AAGACTTC -0.0236209376317  
AAGACTTG 0.0247168062661  
AAGAGAAA 0.0112049660805  
AAGAGAAC -0.00952246000567  
AAGAGAAG -0.0407939801093  
AAGAGAAT 0.357873403745  
AAGAGACA -0.107344807151  
AAGAGACC -0.327314077912  
AAGAGACG -0.236059673322  
AAGAGACT -0.0496388504687  
AAGAGAGA -0.249932465209  
AAGAGAGC -0.122747951686  
AAGAGAGG -0.278908571279  
AAGAGAGT -0.22147780647  
AAGAGATA 0.299909926925  
AAGAGATC 0.389435004062  
AAGAGATG -0.0475872968835



AAGAGATT 0.425160266965  
AAGAGCAA -0.13543240291  
AAGAGCAC -0.100529100529  
AAGAGCAG -0.179088549811  
AAGAGCAT -0.077299759732  
AAGAGCCA -0.0469199435183  
AAGAGCCC -0.350633716506  
AAGAGCCG -0.237739772978  
AAGAGCCT -0.217103638967  
AAGAGCGA 0.0809842148016  
AAGAGCGC -0.0685451342586  
AAGAGCGG -0.179189811049  
AAGAGCGT 0.0254868005137  
AAGAGCTA 0.0350616710008  
AAGAGCTC -0.317998482281  
AAGAGCTG -0.120526349431  
AAGAGCTT -0.158626308513  
AAGAGGAA 0.0356700815266  
AAGAGGAC -0.212352934721  
AAGAGGAG -0.192034560918  
AAGAGGAT 0.27008411663  
AAGAGGCA -0.0912640116537  
AAGAGGCC -0.233159041394  
AAGAGGCG -0.270612280962  
AAGAGGCT -0.247448927722  
AAGAGGGA -0.159368562953  
AAGAGGGC -0.294833590376  
AAGAGGGG -0.179766959613  
AAGAGGGT -0.110597342947  
AAGAGGTA -0.0205235860706  
AAGAGGTC -0.210758246764  
AAGAGGTG -0.100048022831  
AAGAGTAA 0.167155151595  
AAGAGTAC -0.191651509957  
AAGAGTAG -0.0613002943065  
AAGAGTAT 0.168676361629  
AAGAGTCA -0.229623259814  
AAGAGTCC -0.313059986064  
AAGAGTCG -0.134927505498  
AAGAGTCT -0.199711199307  
AAGAGTGA -0.0686322933797  
AAGAGTGC -0.0105391188383  
AAGAGTGG -0.200006390073  
AAGAGTGT -0.137957983608  
AAGAGTTA 0.0164191310457  
AAGAGTTC -0.0111685096838  
AAGAGTTG -0.209761316872  
AAGATAAA 0.146986183952  
AAGATAAC 0.15129806924  
AAGATAAG 0.107233418955  
AAGATAAT 0.257350217327  
AAGATACA 0.0942440399227  
AAGATACC 0.17530623333  
AAGATACG 0.302355704845

AAGATACT 0.28237473305  
AAGATAGA 0.0747795859257  
AAGATAGC 0.0968654635667  
AAGATAGG -0.0598225163818  
AAGATAGT -0.0437358668686  
AAGATATA 0.308903402606  
AAGATATC 0.472408834442  
AAGATATG 0.330803091177  
AAGATATT 0.355929877714  
AAGATCAA 0.257596215065  
AAGATCAC 0.29087690161  
AAGATCAG 0.281965045836  
AAGATCAT 0.198731712987  
AAGATCCA 0.173769848764  
AAGATCCC 0.388977670594  
AAGATCCG 0.341395842111  
AAGATCCT 0.344408931762  
AAGATCGA 0.231972325716  
AAGATCGC 0.393243066552  
AAGATCGG 0.11461661861  
AAGATCGT 0.279434282975  
AAGATCTA 0.36144317109  
AAGATCTC 0.409059474412  
AAGATCTG 0.373081225575  
AAGATCTT 0.387828362631  
AAGATGAA -0.0441923819773  
AAGATGAC -0.00983281740543  
AAGATGAG -0.0197773271118  
AAGATGAT 0.131551726643  
AAGATGCA -0.0876062043074  
AAGATGCC -0.133284814889  
AAGATGCG 0.0246355573119  
AAGATGCT 0.028670841021  
AAGATGGA -0.0880704267088  
AAGATGGC -0.0536821001554  
AAGATGGG 0.0377391658071  
AAGATGGT -0.171465494534  
AAGATGTA -0.170269751105  
AAGATGTC -0.0365485521087  
AAGATGTG 0.000123493380755  
AAGATTAA 0.12184131375  
AAGATTAC 0.47308558395  
AAGATTAG 0.160819664986  
AAGATTAT 0.316036027136  
AAGATTCA 0.22713088199  
AAGATTCC 0.452557639504  
AAGATTCCG 0.399844551305  
AAGATTCT 0.45272398955  
AAGATTGA -0.00542822015851  
AAGATTGC 0.42363649837  
AAGATTGG 0.215060999704  
AAGATTGT 0.326342016184  
AAGATTTA 0.285315183124  
AAGATTTTC 0.473934663769

AAGATTTG 0.392874057501  
AAGCAAAA -0.109031447369  
AAGCAAAC 0.0131342071176  
AAGCAAAG -0.134061812784  
AAGCAAAT 0.176203099958  
AAGCAACA -0.0143027327009  
AAGCAACC -0.250871099259  
AAGCAACG -0.162380074206  
AAGCAACT -0.0846527101826  
AAGCAAGA 0.123354613257  
AAGCAAGC -0.303867347146  
AAGCAAGG -0.0754194002011  
AAGCAAGT -0.0367488858153  
AAGCAATA 0.141120002635  
AAGCAATC 0.403293478419  
AAGCAATG -0.129281155507  
AAGCAATT 0.179032470526  
AAGCACAA -0.087110124417  
AAGCACAC -0.0485768073942  
AAGCACAG -0.115133021753  
AAGCACAT 0.0277119836097  
AAGCACCA -0.338128566657  
AAGCACCC -0.203668949471  
AAGCACCG -0.0910742313982  
AAGCACCT -0.266534587469  
AAGCACGA 0.0292432325627  
AAGCACGC 0.189201464357  
AAGCACGG -0.214948438635  
AAGCACGT 0.131943072296  
AAGCACTA -0.055007046039  
AAGCACTC -0.219385179332  
AAGCACTG -0.152860090434  
AAGCACTT -0.15687678875  
AAGCAGAA 0.201175308355  
AAGCAGAC 0.0767698632923  
AAGCAGAG -0.0710193599368  
AAGCAGAT 0.266362064707  
AAGCAGCA -0.0671295694536  
AAGCAGCC -0.24778167391  
AAGCAGCG -0.119625481577  
AAGCAGCT -0.151476687851  
AAGCAGGA -0.139176954733  
AAGCAGGC -0.235883747139  
AAGCAGGG -0.189326706039  
AAGCAGGT -0.149190672154  
AAGCAGTA 0.0247715485305  
AAGCAGTC -0.264934156379  
AAGCAGTG -0.419675377392  
AAGCATAA -0.046008106766  
AAGCATAC -0.160872824041  
AAGCATAG -0.119638836023  
AAGCATAT 0.232578123172  
AAGCATCA -0.072773308464  
AAGCATCC -0.101423084298

AAGCATCG -0.00994258929944  
AAGCATCT -0.0186200575205  
AAGCATGA -0.167989026063  
AAGCATGC 0.021675038218  
AAGCATGG -0.226621977434  
AAGCATGT -0.0421224349867  
AAGCATT A 0.16144547071  
AAGCATTC -0.24201016703  
AAGCATTG -0.0144350040616  
AAGCCAAA -0.170888694063  
AAGCCAAC -0.115340481592  
AAGCCAAG -0.162178649237  
AAGCCAAT -0.0230877736064  
AAGCCACA -0.228357721704  
AAGCCACC -0.270664625716  
AAGCCACG -0.118608883285  
AAGCCACT -0.218389006876  
AAGCCAGA -0.13159801113  
AAGCCAGC -0.205498768236  
AAGCCAGG -0.200724002568  
AAGCCAGT -0.0931842215353  
AAGCCATA -0.112038683615  
AAGCCATC -0.136203991812  
AAGCCATG -0.16443884746  
AAGCCATT -0.243535712718  
AAGCCCAA -0.259096471156  
AAGCCCAC -0.237654320988  
AAGCCCAG -0.325678774612  
AAGCCCAT -0.14440767994  
AAGCCCCA -0.303201646091  
AAGCCCCC -0.437479090226  
AAGCCCCG -0.159109658678  
AAGCC CCT -0.22816417123  
AAGCCCGA -0.186543707315  
AAGCCCGC -0.408063627671  
AAGCCCGG -0.407775463911  
AAGCCCGT -0.350225206691  
AAGCCCTA -0.189111165994  
AAGCCCTC -0.297860916362  
AAGCCCTG -0.328535216368  
AAGCCCTT -0.285183162738  
AAGCCGAA 0.0140376445015  
AAGCCGAC -0.0739441427779  
AAGCCGAG -0.0351574718888  
AAGCCGAT -0.00961475961801  
AAGCCGCA -0.158298213267  
AAGCCGCC -0.241923491364  
AAGCCGCG -0.126888888889  
AAGCCGCT -0.182039765728  
AAGCCGGA -0.159394997091  
AAGCCGGC -0.264537433419  
AAGCCGGG -0.18876103621  
AAGCCGGT -0.244140496412  
AAGCCGTA -0.0948856838662

AAGCCGTC -0.370228672667  
AAGCCGTG -0.197136234376  
AAGCCTAA -0.193618492542  
AAGCCTAC -0.0517556985748  
AAGCCTAG -0.234312160168  
AAGCCTAT 0.0528283364615  
AAGCCTCA -0.123159313604  
AAGCCTCC -0.214117969822  
AAGCCTCG -0.116120630498  
AAGCCTCT -0.20748696845  
AAGCCTGA -0.0779758152829  
AAGCCTGC -0.158022104847  
AAGCCTGG -0.268159597057  
AAGCCTGT -0.201937197678  
AAGCCTTA -0.137080486265  
AAGCCTTC -0.238123844478  
AAGCCTTG -0.211602315873  
AAGCGAAA 0.126643066875  
AAGCGAAC -0.0896192765266  
AAGCGAAG -0.0981297551368  
AAGCGAAT 0.325342495605  
AAGCGACA 0.0704124475179  
AAGCGACC -0.333064511705  
AAGCGACG 0.0301816681629  
AAGCGACT -0.08615015908  
AAGCGAGA -0.0257260334864  
AAGCGAGC -0.182602759622  
AAGCGAGG -0.0938021163222  
AAGCGAGT -0.0983163486497  
AAGCGATA 0.0923292606744  
AAGCGATC 0.262732991443  
AAGCGATG -0.0714660781454  
AAGCGATT 0.320493077448  
AAGCGCAA -0.00998794183023  
AAGCGCAC -0.323089669097  
AAGCGCAG -0.0243971870897  
AAGCGCAT -0.191774770622  
AAGCGCCA -0.329137599545  
AAGCGCCC -0.235271604938  
AAGCGCCG -0.238375857339  
AAGCGCCT -0.0855450184947  
AAGCGCGA 0.205176296253  
AAGCGCGC -0.0609069353883  
AAGCGCGG -0.212023781517  
AAGCGCGT -0.225391430646  
AAGCGCTA -0.219428410408  
AAGCGCTC -0.0558874377116  
AAGCGCTG -0.130190674581  
AAGCGCTT -0.156581617079  
AAGCGGAA 0.0392762192553  
AAGCGGAC -0.15447531178  
AAGCGGAG -0.083060672659  
AAGCGGAT 0.252821137676  
AAGCGGCA -0.209205355146

AAGCGGCC -0.207714677641  
AAGCGGCG -0.156420761476  
AAGCGGCT -0.243576348278  
AAGCGGGA -0.104372448308  
AAGCGGGC -0.275101883131  
AAGCGGGG 0.0531620007845  
AAGCGGGT -0.0667544798441  
AAGCGGTA 0.00494522382489  
AAGCGGTC -0.0748179012346  
AAGCGGTG -0.163111903856  
AAGCGTAA 0.153959583339  
AAGCGTAC -0.160609783199  
AAGCGTAG -0.163383362332  
AAGCGTAT 0.176142818334  
AAGCGTCA -0.0806359555248  
AAGCGTCC -0.265246080658  
AAGCGTCG -0.181361501249  
AAGCGTCT -0.276367557246  
AAGCGTGA -0.038063404246  
AAGCGTGC -0.17844574399  
AAGCGTGG -0.157162767983  
AAGCGTGT -0.202459929434  
AAGCGTTA -0.0104612614986  
AAGCGTTC -0.124477513093  
AAGCGTTG 0.124154112126  
AAGCTAAA 0.118089514558  
AAGCTAAC -0.312154519603  
AAGCTAAG -0.236089506173  
AAGCTAAT -0.0356965409033  
AAGCTACA -0.0448986032216  
AAGCTACC -0.236611796982  
AAGCTACG -0.17975617284  
AAGCTACT -0.163234398407  
AAGCTAGA -0.0278642188743  
AAGCTAGC -0.0594297379165  
AAGCTAGG -0.16491679643  
AAGCTAGT -0.231126147632  
AAGCTATA 0.0434559485389  
AAGCTATC -0.0735361305937  
AAGCTATG -0.318205381387  
AAGCTATT 0.0624327647149  
AAGCTCAA -0.132213282032  
AAGCTCAC -0.175279475678  
AAGCTCAG -0.17973275236  
AAGCTCAT -0.31600188761  
AAGCTCCA -0.150044446639  
AAGCTCCC -0.20651303155  
AAGCTCCG 0.00343860457968  
AAGCTCCT -0.339761499544  
AAGCTCGA -0.227255332807  
AAGCTCGC -0.13619629209  
AAGCTCGG -0.12287654321  
AAGCTCGT -0.19639153622  
AAGCTCTA -0.181589467079

AAGCTCTC -0.231539211813  
AAGCTCTG -0.299146354175  
AAGCTGAA -0.244627381253  
AAGCTGAC -0.257077328437  
AAGCTGAG -0.159796303613  
AAGCTGAT 0.0589746122691  
AAGCTGCA -0.156423647924  
AAGCTGCC -0.190745862417  
AAGCTGCG -0.0516634272616  
AAGCTGCT -0.208752360203  
AAGCTGGA 0.0800401765132  
AAGCTGGC -0.30247210703  
AAGCTGGG -0.128349640923  
AAGCTGGT -0.237841649245  
AAGCTGTA -0.155637739094  
AAGCTGTC -0.133633450417  
AAGCTGTG -0.132878396251  
AAGCTTAA -0.176168940871  
AAGCTTAC -0.0561961639761  
AAGCTTAG 0.095564666228  
AAGCTTAT -0.0954274517553  
AAGCTTCA -0.240219324244  
AAGCTTCC -0.0451323217092  
AAGCTTCG -0.213239611284  
AAGCTTCT 0.020541668725  
AAGCTTGA -0.278389251997  
AAGCTTGC 0.0877769313369  
AAGCTTGG -0.18774841237  
AAGCTTGT -0.147102407276  
AAGCTTTA -0.153947280498  
AAGCTTTC -0.240089828997  
AAGCTTTG -0.0153545537751  
AAGGAAAA 0.0870079474851  
AAGGAAAC -0.0945591447419  
AAGGAAAG -0.325899314006  
AAGGAAAT 0.348649435672  
AAGGAACA 0.072756811346  
AAGGAACC -0.149255399911  
AAGGAACG -0.141798641292  
AAGGAACT -0.108853161968  
AAGGAAGA -0.0941010868713  
AAGGAAGC -0.136351488744  
AAGGAAGG -0.282538082146  
AAGGAAGT -0.108150160533  
AAGGAATA 0.148471975235  
AAGGAATC 0.349029034078  
AAGGAATG -0.0583340353772  
AAGGAATT 0.149175673462  
AAGGACAA -0.0404980293056  
AAGGACAC -0.32626647904  
AAGGACAG -0.170071169208  
AAGGACAT -0.0481498699752  
AAGGACCA -0.198437782936  
AAGGACCC -0.254694777728

AAGGACCG -0.24997531108  
AAGGACCT -0.286417608718  
AAGGACGA -0.120014992068  
AAGGACGC -0.0629850066405  
AAGGACGG -0.157234102096  
AAGGACGT -0.127269017112  
AAGGACTA -0.144633140925  
AAGGACTC -0.343868312757  
AAGGACTG -0.30755829904  
AAGGACTT -0.178042353406  
AAGGAGAA -0.0166626958993  
AAGGAGAC -0.22945467562  
AAGGAGAG -0.168932834108  
AAGGAGAT 0.30908197765  
AAGGAGCA -0.22231824417  
AAGGAGCC -0.151305946844  
AAGGAGCG -0.115970785786  
AAGGAGCT -0.240718792867  
AAGGAGGA -0.152888888889  
AAGGAGGC -0.352425741159  
AAGGAGGG -0.284384403574  
AAGGAGGT -0.0387536284371  
AAGGAGTA -0.0859892883796  
AAGGAGTC -0.132753852232  
AAGGAGTG -0.178685501663  
AAGGATAA 0.0543014116666  
AAGGATAC 0.164748013308  
AAGGATAG -0.0523560209424  
AAGGATAT 0.392548632197  
AAGGATCA 0.0685690135898  
AAGGATCC 0.262470036175  
AAGGATCG 0.0484084668691  
AAGGATCT 0.337545829766  
AAGGATGA -0.101777755823  
AAGGATGC -0.0583517183092  
AAGGATGG -0.164427651833  
AAGGATGT 0.0355029748183  
AAGGATTA 0.254481437573  
AAGGATTC 0.372165140837  
AAGGATTG 0.265051646739  
AAGGCAAA 0.0159363360083  
AAGGCAAC -0.19608248568  
AAGGCAAG 0.0121891696373  
AAGGCAAT 0.176945651069  
AAGGCACA -0.175228658118  
AAGGCACC -0.22316425212  
AAGGCACG -0.300464654444  
AAGGCACT -0.330474481593  
AAGGCAGA 0.136186712769  
AAGGCAGC -0.217867236767  
AAGGCAGG -0.178572154752  
AAGGCAGT 0.104111400055  
AAGGCATA -0.144182115534  
AAGGCATC -0.0926247628786



AAGGCATG -0.15941504769  
AAGGCATT -0.122372056136  
AAGGCCAA -0.319628369841  
AAGGCCAC -0.183922304599  
AAGGCCAG -0.29711277882  
AAGGCCAT -0.203354401211  
AAGGCCCA -0.206672476398  
AAGGCCCC -0.441575751592  
AAGGCCCG -0.24919405898  
AAGGCCCT -0.483075060322  
AAGGCCGA -0.120196204315  
AAGGCCGC -0.280320306304  
AAGGCCGG -0.224480831709  
AAGGCCGT -0.353475513428  
AAGGCCTA -0.179579101494  
AAGGCCTC -0.236086989353  
AAGGCCTG -0.34717045174  
AAGGCCTT -0.138028851764  
AAGGCGAA -0.0272066449932  
AAGGCGAC -0.302957296087  
AAGGCGAG -0.19355165692  
AAGGCGAT 0.154646644273  
AAGGCGCA -0.0949170124481  
AAGGCGCC -0.337684069612  
AAGGCGCG -0.133587267878  
AAGGCGCT -0.168043413839  
AAGGCGGA 0.0487421874188  
AAGGCGGC -0.198399419027  
AAGGCGGG -0.266015912068  
AAGGCGGT -0.0697539319681  
AAGGCGTA -0.0818322026828  
AAGGCGTC -0.21472628298  
AAGGCGTG -0.00361954940863  
AAGGCTAA -0.209809925254  
AAGGCTAC -0.16030801396  
AAGGCTAG -0.0855218816092  
AAGGCTAT -0.284228520305  
AAGGCTCA -0.229888162672  
AAGGCTCC -0.334897684637  
AAGGCTCG -0.212716489351  
AAGGCTCT -0.238168902054  
AAGGCTGA -0.26689030713  
AAGGCTGC -0.099040623856  
AAGGCTGG -0.172536336281  
AAGGCTGT -0.333301389276  
AAGGCTTA -0.239144525656  
AAGGCTTC -0.24833358021  
AAGGCTTG -0.142277091907  
AAGGAAA 0.102738259896  
AAGGGAAC -0.289073596947  
AAGGGAAG -0.338555476498  
AAGGGAAT 0.255993545413  
AAGGGACA -0.0499978208127  
AAGGGACC -0.256976798225

AAGGGACG -0.236494607722  
AAGGGACT -0.207087931721  
AAGGGAGA -0.185055675277  
AAGGGAGC -0.0387426539582  
AAGGGAGG -0.148775429587  
AAGGGAGT -0.126581414333  
AAGGGATA 0.197278921448  
AAGGGATC 0.165302750884  
AAGGGATG -0.161623644585  
AAGGGATT 0.319534235033  
AAGGGCAA -0.151433119169  
AAGGGCAC -0.299260891712  
AAGGGCAG -0.208303839421  
AAGGGCAT -0.0393251244981  
AAGGGCCA -0.304729001658  
AAGGGCCC -0.327591230063  
AAGGGCCG -0.325541838134  
AAGGGCCT -0.238972282573  
AAGGGCGA -0.127917718522  
AAGGGCGC -0.153318956766  
AAGGGCGG -0.036722762742  
AAGGGCGT -0.266213358739  
AAGGGCTA -0.116803153678  
AAGGGCTC -0.258966434688  
AAGGGCTG -0.348602164278  
AAGGGGAA 0.0486662056019  
AAGGGGAC -0.228416397832  
AAGGGGAG -0.117732756592  
AAGGGGAT 0.185517245165  
AAGGGGCA -0.258738428784  
AAGGGGCC -0.375407266624  
AAGGGGCG -0.207754172427  
AAGGGGCT -0.308257220439  
AAGGGGGA 0.0178940333851  
AAGGGGGC -0.184137919017  
AAGGGGGG -0.165544637028  
AAGGGGGT -0.231622730072  
AAGGGGTA -0.020727350554  
AAGGGGTC -0.388948262593  
AAGGGGTG -0.171602682295  
AAGGGTAA 0.047877390851  
AAGGGTAC -0.16178350589  
AAGGGTAG -0.198286883852  
AAGGGTAT 0.0475998375376  
AAGGGTCA -0.201645815602  
AAGGGTCC -0.295207294393  
AAGGGTCG -0.286277897977  
AAGGGTCT -0.198449168814  
AAGGGTGA -0.207032566137  
AAGGGTGC -0.389317089462  
AAGGGTGG 0.00866289088654  
AAGGGTGT -0.28467776603  
AAGGGTTA -0.132803481733  
AAGGGTTC -0.260854981341

AAGGGTTG -0.226002370136  
AAGGTAAA 0.123720482166  
AAGGTAAC -0.224581590774  
AAGGTAAG -0.0707474533822  
AAGGTAAT 0.257473886072  
AAGGTACA -0.0299346405229  
AAGGTACC -0.0309455587393  
AAGGTACG -0.122980596163  
AAGGTACT -0.122838310098  
AAGGTAGA -0.0636874754841  
AAGGTAGC -0.293718287196  
AAGGTAGG -0.0648340248963  
AAGGTAGT -0.00916185113844  
AAGGTATA -0.00117455926585  
AAGGTATC 0.204691063879  
AAGGTATG -0.0332438780774  
AAGGTATT -0.0296006276059  
AAGGTCAA -0.269887127485  
AAGGTCAC -0.263682411112  
AAGGTCAG -0.0754324746791  
AAGGTCAT -0.195801473493  
AAGGTCCA -0.252496543722  
AAGGTCCC -0.279371824776  
AAGGTCCG -0.283776478233  
AAGGTCCT -0.393598359656  
AAGGTCGA 0.0343942786889  
AAGGTCGC -0.186440910488  
AAGGTCGG -0.192536445388  
AAGGTCGT -0.155678836952  
AAGGTCTA -0.0778806736801  
AAGGTCTC -0.272451323846  
AAGGTCTG -0.168203321369  
AAGGTGAA -0.085541011498  
AAGGTGAC -0.244525865449  
AAGGTGAG -0.163064099547  
AAGGTGAT 0.110669301062  
AAGGTGCA -0.0827859271332  
AAGGTGCC -0.198081871345  
AAGGTGCG -0.290689905592  
AAGGTGCT -0.212695608719  
AAGGTGGA -0.144284402817  
AAGGTGGC -0.285435861091  
AAGGTGGG -0.296763899862  
AAGGTGGT -0.214466775303  
AAGGTGTA -0.126413943355  
AAGGTGTC -0.205250162443  
AAGGTGTG -0.0861651684283  
AAGGTTAA 0.135324046631  
AAGGTTAC -0.110528915522  
AAGGTTAG -0.0622536632037  
AAGGTTAT -0.0753293315746  
AAGGTTCA -0.0682021443651  
AAGGTTCC -0.247776296223  
AAGGTTCCG 0.0467580956809

AAGGTTCT -0.231092229484  
AAGGTTGA 0.00466393334651  
AAGGTTGC -0.247534857688  
AAGGTTGG -0.221783178021  
AAGGTTGT -0.083319533177  
AAGGTTTA 0.0776328214664  
AAGGTTTC -0.0394327343825  
AAGGTTTG -0.136742117205  
AAGTAAAA 0.108048475268  
AAGTAAAC 0.0522987803451  
AAGTAAAG 0.10382374733  
AAGTAAAT 0.174333531882  
AAGTAACA 0.0327998419285  
AAGTAACC -0.10727318686  
AAGTAACG -0.073673406661  
AAGTAACT -0.131888674865  
AAGTAAGA 0.0884648351808  
AAGTAAGC 0.0320238838929  
AAGTAAGG 0.0179449603723  
AAGTAAGT 0.0561350642327  
AAGTAATA 0.0765286998969  
AAGTAATC 0.363399822759  
AAGTAATG 0.0440843926321  
AAGTAATT 0.118970551916  
AAGTACAA -0.0458325100441  
AAGTACAC -0.0351764415324  
AAGTACAG 0.124322635945  
AAGTACAT 0.0302863452123  
AAGTACCA -0.00324408350646  
AAGTACCC -0.202706707498  
AAGTACCG -0.314448998853  
AAGTACCT -0.133202782249  
AAGTACGA 0.229452442869  
AAGTACGC -0.197625671501  
AAGTACGG -0.00378288231226  
AAGTACGT 0.0501024218035  
AAGTACTA 0.0411425058728  
AAGTACTC -0.132777942419  
AAGTACTG -0.0947583281275  
AAGTACTT 0.106596307253  
AAGTAGAA 0.0924484447634  
AAGTAGAC -0.16183079484  
AAGTAGAG -0.152092955701  
AAGTAGAT 0.265453138378  
AAGTAGCA 0.0068905902692  
AAGTAGCC -0.258765432099  
AAGTAGCG 0.0440113151525  
AAGTAGCT -0.136165953936  
AAGTAGGA 0.0333734000746  
AAGTAGGC -0.179307771247  
AAGTAGGG 0.107263957695  
AAGTAGGT -0.0507667566796  
AAGTAGTA -0.046453170879  
AAGTAGTC 0.00235949009014

AAGTAGTG -0.0435312325068  
AAGTATAA 0.0844580361164  
AAGTATAC 0.00713047005203  
AAGTATAG 0.0397758457924  
AAGTATAT 0.141869452152  
AAGTATCA 0.1196189976  
AAGTATCC 0.112369067163  
AAGTATCG 0.0911670274432  
AAGTATCT 0.229667500933  
AAGTATGA 0.102960789156  
AAGTATGC 0.0977133061177  
AAGTATGG -0.118032048581  
AAGTATGT -0.00735746119564  
AAGTATTA 0.000751093225633  
AAGTATTC 0.094441619572  
AAGTATTG 0.0409876076882  
AAGTCAAA -0.0271812950706  
AAGTCAAC -0.224621641249  
AAGTCAAG -0.195374577462  
AAGTCAAT -0.00826307932117  
AAGTCACA -0.0731495067773  
AAGTCACC -0.20899896597  
AAGTCACG -0.12915171502  
AAGTCACT -0.0865428755716  
AAGTCAGA 0.0275725306176  
AAGTCAGC -0.272436647173  
AAGTCAGG -0.0265936275236  
AAGTCAGT -0.145390537967  
AAGTCATA -0.101553829079  
AAGTCATC -0.17423362075  
AAGTCATG -0.20526390878  
AAGTCATT -0.136312133388  
AAGTCCAA -0.18288453159  
AAGTCCAC -0.265687581506  
AAGTCCAG -0.0469659048497  
AAGTCCAT -0.124358615542  
AAGTCCCA -0.250857020011  
AAGTCCCC -0.21360486527  
AAGTCCCG -0.260200274348  
AAGTCCCT -0.164548705836  
AAGTCCGA -0.167738562092  
AAGTCCGC -0.0518975878818  
AAGTCCGG -0.210578300163  
AAGTCCGT 0.00217590534675  
AAGTCCTA -0.180168482208  
AAGTCCTC -0.180282524943  
AAGTCCTG -0.152046296296  
AAGTCGAA -0.0216218964741  
AAGTCGAC -0.129919153  
AAGTCGAG -0.198618108378  
AAGTCGAT 0.0721740242081  
AAGTCGCA -0.021317973033  
AAGTCGCC -0.257902417081  
AAGTCGCG -0.0615040168576

AAGTCGCT -0.106624628184  
AAGTCGGA -0.113944624716  
AAGTCGGC -0.27659450062  
AAGTCGGG -0.272031953522  
AAGTCGGT -0.108861009582  
AAGTCGTA -0.0882785571582  
AAGTCGTC -0.0982323668873  
AAGTCGTG -0.0472781950518  
AAGTCTAA -0.18042271646  
AAGTCTAC -0.271000702401  
AAGTCTAG -0.07370000878  
AAGTCTAT -0.0132371826534  
AAGTCTCA -0.0628986096785  
AAGTCTCC -0.415223034618  
AAGTCTCG -0.253555906756  
AAGTCTCT -0.195192447349  
AAGTCTGA -0.115952051637  
AAGTCTGC -0.170423214478  
AAGTCTGG -0.216272544275  
AAGTCTGT -0.23608282762  
AAGTCTTA 0.0915999593218  
AAGTCTTC 0.0405552262399  
AAGTCTTG -0.155502044401  
AAGTGAAA 0.00718506982271  
AAGTGAAC -0.162139246967  
AAGTGAAG -0.137557007988  
AAGTGAAT 0.174232694461  
AAGTGACA -0.0331199608962  
AAGTGACC -0.215086419753  
AAGTGACG -0.0560055758613  
AAGTGACT -0.179390266577  
AAGTGAGA 0.0543514717238  
AAGTGAGC -0.172881803949  
AAGTGAGG -0.157565203752  
AAGTGAGT -0.0992116894661  
AAGTGATA 0.110791335551  
AAGTGATC 0.100294502618  
AAGTGATG 0.0365507823282  
AAGTGATT 0.244509174379  
AAGTGCAA -0.0119716497191  
AAGTGCAC -0.167267578736  
AAGTGCAG -0.126426581694  
AAGTGCAT -0.136871849258  
AAGTGCCA -0.262167352538  
AAGTGCCC -0.0403316939399  
AAGTGCCG -0.0384807552651  
AAGTGCCT -0.294797318493  
AAGTGCGA 0.0288727524205  
AAGTGCGC 0.0799601935118  
AAGTGCGG 0.086422210277  
AAGTGCGT -0.152008078413  
AAGTGCTA -0.202909732853  
AAGTGCTC -0.230703657555  
AAGTGCTG -0.197163237311

AAGTGGAA 0.0282470526246  
AAGTGGAC -0.0599050520019  
AAGTGGAG -0.187173037207  
AAGTGGAT 0.276458965903  
AAGTGGCA -0.146324074074  
AAGTGGCC -0.123478864606  
AAGTGGCG -0.230655505339  
AAGTGGCT -0.200583354638  
AAGTGGGA -0.0703025115095  
AAGTGGGC -0.188626598844  
AAGTGGGG -0.235826488678  
AAGTGGGT -0.141365005679  
AAGTGGTA 0.139257332965  
AAGTGGTC -0.211244457614  
AAGTGGTG -0.0243298999027  
AAGTGTA 0.0820260630802  
AAGTGTAC -0.0957510978454  
AAGTGTAG 0.0182339866053  
AAGTGTAT 0.0384530944697  
AAGTGTCA -0.221141342814  
AAGTGTCC -0.0353932029243  
AAGTGTCCG 0.19402456695  
AAGTGTCT 0.0563582625305  
AAGTGTGA -0.00351544490549  
AAGTGTGC -0.0798966825691  
AAGTGTGG -0.0315677073497  
AAGTGTGT -0.083566587086  
AAGTGTTA -0.0453385365211  
AAGTGTTT -0.172433755302  
AAGTGTTG 0.0191920626297  
AAGTTAAA 0.0176595534479  
AAGTTAAC 0.0440692989967  
AAGTTAAG -0.142849049532  
AAGTTAAT -6.53756192523E-5  
AAGTTACA -0.059916028649  
AAGTTACC 0.0731931546247  
AAGTTACG -0.045596500472  
AAGTTACT -0.0557279364554  
AAGTTAGA -0.0550057818247  
AAGTTAGC -0.0294117647059  
AAGTTAGG -0.0268860132914  
AAGTTAGT 0.0620979604382  
AAGTTATA 0.0355948454956  
AAGTTATC -0.0272383885636  
AAGTTATG 0.0794953002194  
AAGTTATT 0.164926782147  
AAGTTCAA -0.0135359559441  
AAGTTCAC -0.124739389717  
AAGTTCAG 0.0510247206305  
AAGTTCAT 0.1174394608  
AAGTTCCA -0.246538852578  
AAGTTCCC -0.112958605664  
AAGTTCCG -0.000466530549518  
AAGTTCCT -0.229903219435

AAGTTCGA 0.029449054864  
AAGTTCGC -0.000751937473929  
AAGTTCGG -0.241887035816  
AAGTTCGT -0.0709730180685  
AAGTTCTA -0.00576031845191  
AAGTTCTC -0.138478395062  
AAGTTCTG 0.023178335419  
AAGTTGAA 0.0135668247148  
AAGTTGAC 0.0220943379657  
AAGTTGAG -0.0939381086295  
AAGTTGAT 0.194374814778  
AAGTTGCA 0.125785597025  
AAGTTGCC -0.166430727023  
AAGTTGCG 0.0307965048629  
AAGTTGCT -0.0752833347054  
AAGTTGGA 0.0456394461959  
AAGTTGGC -0.0949461648639  
AAGTTGGG -0.198154647082  
AAGTTGGT -0.194325096987  
AAGTTGTA 0.0763889791663  
AAGTTGTC -0.098293131363  
AAGTTGTG -0.0713603661448  
AAGTTTAA -0.0858318926484  
AAGTTTAC -0.161738556926  
AAGTTTAG 0.0279040154559  
AAGTTTAT 0.00988334083942  
AAGTTTCA 0.0155560495291  
AAGTTTCC -0.116116462227  
AAGTTTCG 0.0176121918266  
AAGTTTCT -0.0745585112409  
AAGTTTGA 0.157636556236  
AAGTTTGC 0.0693017409822  
AAGTTTGG -0.00720148765854  
AAGTTTGT -0.16249320887  
AAGTTTTA 0.0332526509912  
AAGTTTTC 0.0965224263979  
AAGTTTTG -0.0692928444818  
AATAAAAA 0.227526041288  
AATAAAAC 0.0650535686843  
AATAAAAG 0.0949609212057  
AATAAAAT 0.304606028672  
AATAAACA 0.213965685064  
AATAAACC -0.178247176779  
AATAAACG 0.0689029971089  
AATAAACT -0.0207304221827  
AATAAAGA 0.187986866764  
AATAAAGC 0.0234417879646  
AATAAAGG -0.0164712726953  
AATAAAGT 0.131272790667  
AATAAATA 0.167822120204  
AATAAATC 0.237886671497  
AATAAATG 0.0889268228902  
AATAAATT 0.115411212645  
AATAACAA 0.110797146717



AATAACAC 0.0843447183764  
AATAACAG 0.0934246654947  
AATAACAT 0.0304232804233  
AATAACCA 0.0582148097569  
AATAACCC 0.0143948395417  
AATAACCG 0.0133407967161  
AATAACCT -0.0326143629428  
AATAACGA 0.158361541702  
AATAACGC -0.092864022523  
AATAACGG 0.0309254868383  
AATAACGT 0.143148038376  
AATAACTA -0.050275527454  
AATAACTC -0.0267328171081  
AATAACTG 0.148414344991  
AATAAGAA 0.204977057674  
AATAAGAC -0.121570818312  
AATAAGAG -0.143493849184  
AATAAGAT 0.309979362884  
AATAAGCA -0.0876890984576  
AATAAGCC -0.033606377432  
AATAAGCG -0.136803634927  
AATAAGCT -0.0150442380733  
AATAAGGA 0.121414147284  
AATAAGGC 0.0741199715253  
AATAAGGG -0.0264277308849  
AATAAGGT -0.0673225213359  
AATAAGTA 0.158988122681  
AATAAGTC -0.00639632520004  
AATAAGTG 0.0526164130936  
AATAATAA 0.282100046104  
AATAATAC 0.120510510947  
AATAATAG 0.199422108071  
AATAATAT 0.310005680134  
AATAATCA 0.147930498453  
AATAATCC 0.305856712437  
AATAATCG 0.097573492283  
AATAATCT 0.254242683703  
AATAATGA 0.156775093342  
AATAATGC 0.205391446574  
AATAATGG 0.0886740371624  
AATAATGT 0.178769017981  
AATAATTA 0.162259325122  
AATAATTC 0.112691826385  
AATAATTG 0.0364171255067  
AATACAAA 0.228505291005  
AATACAAC 0.125128981975  
AATACAAG 0.234253221805  
AATACAAT 0.165953830285  
AATACACA 0.210560341697  
AATACACC 0.116364243895  
AATACACG -0.00208566598608  
AATACACT -0.0115325727268  
AATACAGA 0.104653291299  
AATACAGC -0.0589420184856

AATACAGG 0.113554545058  
AATACAGT -0.114127292642  
AATACATA 0.0939128034518  
AATACATC 0.14009912402  
AATACATG -0.0143554194384  
AATACATT 0.162327932556  
AATACCAA 0.0201129552789  
AATACCAC 0.211321604463  
AATACCAG -0.0732119768134  
AATACCAT -0.000455553360118  
AATACCCA 0.0459230718567  
AATACCCC -0.107623110738  
AATACCCG -0.0578864788691  
AATACCCCT -0.0596190496  
AATACCGA 0.0706107708182  
AATACCGC 0.0744363213243  
AATACCGG -0.0762492796575  
AATACCGT 0.0265328885619  
AATACCTA 0.0352587323542  
AATACCTC 0.0122252408002  
AATACCTG 0.0159635776856  
AATACGAA 0.158902232611  
AATACGAC 0.164825007735  
AATACGAG 0.138048610405  
AATACGAT 0.274322707414  
AATACGCA 0.169777577615  
AATACGCC 0.0331512501271  
AATACGCG 0.185375321424  
AATACGCT 0.089326878746  
AATACGGA 0.194019078355  
AATACGGC 0.106796158819  
AATACGGG -0.054697532846  
AATACGGT 0.045235570148  
AATACGTA 0.125791371676  
AATACGTC 0.0983380064795  
AATACGTG 0.17723871382  
AATACTAA 0.183457062746  
AATACTAC -0.0272674443944  
AATACTAG 0.0158922259545  
AATACTAT 0.0341033831698  
AATACTCA 0.0557531449648  
AATACTCC 0.150577067576  
AATACTCG -0.00661241726761  
AATACTCT -0.0919681137339  
AATACTGA 0.117867571187  
AATACTGC 0.0521334243749  
AATACTGG 0.0200034866997  
AATACTGT -0.0936338674764  
AATACTTA 0.16867274803  
AATACTTC 0.0682973281521  
AATACTTG -0.0145546253766  
AATAGAAA 0.159082126306  
AATAGAAC -0.0938195489596  
AATAGAAG -0.0672846824299

AATAGAAT 0.254135371116  
AATAGACA -0.00086441096567  
AATAGACC -0.18399811239  
AATAGACG -0.0980459940409  
AATAGACT -0.0466593058562  
AATAGAGA 0.263476820711  
AATAGAGC -0.0466233089103  
AATAGAGG 0.0792745175525  
AATAGAGT -0.0531517885563  
AATAGATA 0.193711717052  
AATAGATC 0.207820149729  
AATAGATG -0.0273057586336  
AATAGATT 0.389846439934  
AATAGCAA 0.12282626066  
AATAGCAC -0.215138175442  
AATAGCAG -0.0559270922909  
AATAGCAT 0.0901007705987  
AATAGCCA -0.175244492739  
AATAGCCC -0.106700274578  
AATAGCCG -0.037508189561  
AATAGCCT -0.0439389625256  
AATAGCGA 0.0693402873622  
AATAGCGC -0.153113920994  
AATAGCGG 0.0773644865969  
AATAGCGT 0.00154778370546  
AATAGCTA -0.0447608931924  
AATAGCTC -0.0239020321255  
AATAGCTG -0.0243117302246  
AATAGGAA 0.121791916398  
AATAGGAC -0.0331654072208  
AATAGGAG -0.0130823878082  
AATAGGAT 0.323514883849  
AATAGGCA -0.189070534455  
AATAGGCC -0.292310013717  
AATAGGCG -0.103938226481  
AATAGGCT -0.0186146179885  
AATAGGGA 0.058513908099  
AATAGGGC -0.177121278141  
AATAGGGG -0.0399445033632  
AATAGGGT -0.0974372757253  
AATAGGTA 0.0312277541296  
AATAGGTC -0.0131317827205  
AATAGGTG -0.0837641880173  
AATAGTAA 0.19059693956  
AATAGTAC -0.0354421494586  
AATAGTAG 0.158306335624  
AATAGTAT -0.079742274781  
AATAGTCA 0.0602922127818  
AATAGTCC -0.0509653799776  
AATAGTCG -0.0238467660053  
AATAGTCT -0.08921631072  
AATAGTGA -0.0968394305597  
AATAGTGC -0.074374665301  
AATAGTGG 0.0894905060073

AATAGTGT -0.00721530277543  
AATAGTTA 0.134596807833  
AATAGTTC -0.082650763442  
AATAGTTG -0.019640288815  
AATATAAA 0.17912774396  
AATATAAC 0.210715383433  
AATATAAG 0.0912193279386  
AATATAAT 0.18002316187  
AATATAACA 0.216865456976  
AATATAACC 0.251904542361  
AATATAACG 0.219266613976  
AATATAACT 0.262930571092  
AATATAGA 0.274828933796  
AATATAGC 0.115716298868  
AATATAGG 0.224632080543  
AATATAGT 0.122818283607  
AATATATA 0.279105952087  
AATATATC 0.314771984368  
AATATATG 0.248010401987  
AATATATT 0.215798546424  
AATATCAA 0.356080658986  
AATATCAC 0.335247628318  
AATATCAG 0.358737293903  
AATATCAT 0.305514796682  
AATATCCA 0.416842301697  
AATATCCC 0.321310550496  
AATATCCG 0.416778289483  
AATATCCT 0.392286329008  
AATATCGA 0.361495981717  
AATATCGC 0.321760348607  
AATATCGG 0.355172009286  
AATATCGT 0.348556504989  
AATATCTA 0.414796681824  
AATATCTC 0.415752618657  
AATATCTG 0.447684976683  
AATATGAA 0.218629145904  
AATATGAC 0.15168829173  
AATATGAG 0.285324878988  
AATATGAT 0.218138102364  
AATATGCA 0.168225427562  
AATATGCC -0.0277587834131  
AATATGCG 0.163145414789  
AATATGCT 0.0863740147973  
AATATGGA 0.131092340117  
AATATGGC 0.217164482206  
AATATGGG 0.0154300989351  
AATATGGT 0.188105995671  
AATATGTA 0.18864352854  
AATATGTC 0.102043952666  
AATATGTG 0.158383005115  
AATATTAA 0.27466848888  
AATATTAC 0.294897261432  
AATATTAG 0.23843329858  
AATATTAT 0.270914962157

AATATTCA 0.211917385673  
AATATTCC 0.354851368856  
AATATTCT 0.292416871849  
AATATTCT 0.356054204572  
AATATTGA 0.289289084986  
AATATTGC 0.209477705328  
AATATTGG 0.276704757514  
AATATTGT 0.205487496981  
AATATTTA 0.230798151441  
AATATTTT 0.357042200423  
AATATTTG 0.252010441556  
AATCAAAA 0.262732796522  
AATCAAAC 0.284167477809  
AATCAAAG 0.239296558337  
AATCAAAT 0.307740016246  
AATCAACA 0.186672594349  
AATCAACC 0.135099443581  
AATCAACG 0.240156610928  
AATCAACT 0.267347057371  
AATCAAGA 0.284314694066  
AATCAAGC 0.249422725477  
AATCAAGG 0.238265384531  
AATCAAGT 0.161642621101  
AATCAATA 0.252014314255  
AATCAATC 0.251766042583  
AATCAATG 0.193106045639  
AATCAATT 0.131084949443  
AATCACAA 0.383099676027  
AATCACAC 0.267094271643  
AATCACAG 0.310683828977  
AATCACAT 0.281317100809  
AATCACCA 0.264569319948  
AATCACCC 0.150069156293  
AATCACCG 0.292012552119  
AATCACCT 0.193418077236  
AATCACGA 0.320272253134  
AATCACGC 0.255665160606  
AATCACGG 0.258663746734  
AATCACGT 0.344214472327  
AATCACTA 0.232999321403  
AATCACTC 0.0768869788579  
AATCACTG 0.27315241236  
AATCAGAA 0.359699389263  
AATCAGAC 0.214898377232  
AATCAGAG 0.295618454851  
AATCAGAT 0.376469135444  
AATCAGCA 0.346108697863  
AATCAGCC 0.206321763376  
AATCAGCG 0.27668829173  
AATCAGCT 0.120751674342  
AATCAGGA 0.4035026804  
AATCAGGC 0.288650792498  
AATCAGGG 0.257190919798  
AATCAGGT 0.347022251309

AATCAGTA 0.317110978746  
AATCAGTC 0.219030604404  
AATCAGTG 0.280088039167  
AATCATAA 0.282546162451  
AATCATAC 0.290118882961  
AATCATAG 0.179816367149  
AATCATAT 0.321741421326  
AATCATCA 0.191862060638  
AATCATCC 0.14884287486  
AATCATCG 0.194059535397  
AATCATCT 0.191461393225  
AATCATGA 0.223451667435  
AATCATGC 0.0486234604492  
AATCATGG 0.287849349053  
AATCATGT 0.257730417532  
AATCATTA 0.312259211696  
AATCATTC 0.15853878227  
AATCATTG 0.0437624395276  
AATCCAAA 0.413146310636  
AATCCAAC 0.338788996465  
AATCCAAG 0.398609190103  
AATCCAAT 0.415784580071  
AATCCACA 0.415105161474  
AATCCACC 0.39266778634  
AATCCACG 0.422635944968  
AATCCACT 0.394872829261  
AATCCAGA 0.335054007772  
AATCCAGC 0.36949864164  
AATCCAGG 0.411487222698  
AATCCAGT 0.390598586138  
AATCCATA 0.37935437944  
AATCCATC 0.327172385782  
AATCCATG 0.38978901842  
AATCCATT 0.351994555314  
AATCCCAA 0.373249749393  
AATCCCAC 0.344637094118  
AATCCCAG 0.353663088103  
AATCCCAT 0.33614349382  
AATCCCCA 0.342451061706  
AATCCCCC 0.286698240669  
AATCCCCG 0.390822715849  
AATCCCCT 0.260469542225  
AATCCCGA 0.401718479001  
AATCCCGC 0.385741179828  
AATCCCGG 0.344278180524  
AATCCCGT 0.346692572834  
AATCCCTA 0.290411575843  
AATCCCTC 0.277458486482  
AATCCCTG 0.254264638082  
AATCCGAA 0.401927045599  
AATCCGAC 0.408753069022  
AATCCGAG 0.397676986329  
AATCCGAT 0.426145889326  
AATCCGCA 0.375839754989

AATCCGCC 0.417033980794  
AATCCGCG 0.369258929944  
AATCCGCT 0.363201373111  
AATCCGGA 0.396411007926  
AATCCGGC 0.387292551615  
AATCCGGG 0.40888338269  
AATCCGGT 0.374165008063  
AATCCGTA 0.305930295062  
AATCCGTC 0.413168033192  
AATCCGTG 0.279816717716  
AATCCTAA 0.379241578583  
AATCCTAC 0.34113806722  
AATCCTAG 0.358132000639  
AATCCTAT 0.385639640826  
AATCCTCA 0.358428370113  
AATCCTCC 0.369181933084  
AATCCTCG 0.311184109421  
AATCCTCT 0.386272572749  
AATCCTGA 0.408596142448  
AATCCTGC 0.343182616523  
AATCCTGG 0.364983365537  
AATCCTGT 0.353602713561  
AATCCTTA 0.359044655206  
AATCCTTC 0.319315462469  
AATCCTTG 0.324573536791  
AATCGAAA 0.280004523981  
AATCGAAC 0.185267241004  
AATCGAAG 0.273886364135  
AATCGAAT 0.325839350312  
AATCGACA 0.0452181366496  
AATCGACC 0.282740836517  
AATCGACG 0.258229337672  
AATCGACT 0.293888298923  
AATCGAGA 0.272211003443  
AATCGAGC 0.243829267938  
AATCGAGG 0.245329324311  
AATCGAGT 0.222644844014  
AATCGATA 0.288107313004  
AATCGATC 0.22284514695  
AATCGATG 0.212545070631  
AATCGATT 0.364235660641  
AATCGCAA 0.395228215768  
AATCGCAC 0.310347098729  
AATCGCAG 0.279470902085  
AATCGCAT 0.245078668662  
AATCGCCA 0.284775736021  
AATCGCCC 0.268201298796  
AATCGCCG 0.329145903854  
AATCGCCT 0.134236485407  
AATCGCGA 0.362505214165  
AATCGCGC 0.352483547136  
AATCGCGG 0.333898658587  
AATCGCGT 0.301941315945  
AATCGCTA 0.251746981826

AATCGCTC 0.130046634608  
AATCGCTG 0.229946391992  
AATCGGAA 0.312174393096  
AATCGGAC 0.171689451281  
AATCGGAG 0.308335528771  
AATCGGAT 0.326661328022  
AATCGGCA 0.289387357808  
AATCGGCC 0.168016860963  
AATCGGCG 0.289756635711  
AATCGGCT 0.197496103098  
AATCGGGA 0.303543985598  
AATCGGGC 0.233035026804  
AATCGGGG 0.342944517891  
AATCGGGT 0.231471823108  
AATCGGTA 0.313141952261  
AATCGGTC 0.181628575819  
AATCGGTG 0.17350819996  
AATCGTAA 0.375255219654  
AATCGTAC 0.258328127497  
AATCGTAG 0.303905103657  
AATCGTAT 0.348319941162  
AATCGTCA 0.295911844609  
AATCGTCC 0.291492452748  
AATCGTCG 0.291788822222  
AATCGTCT 0.223391396569  
AATCGTGA 0.344315953104  
AATCGTGC 0.317607833452  
AATCGTGG 0.336848778239  
AATCGTGT 0.295874072029  
AATCGTTA 0.0624816585068  
AATCGTTC 0.137150723967  
AATCGTTG 0.143418127933  
AATCTAAA 0.377793761731  
AATCTAAC 0.432245875729  
AATCTAAG 0.419837868464  
AATCTAAT 0.404168058925  
AATCTACA 0.422190937232  
AATCTACC 0.410231289381  
AATCTACG 0.368185318089  
AATCTACT 0.398589980022  
AATCTAGA 0.464535445345  
AATCTAGC 0.399859079221  
AATCTAGG 0.430604952908  
AATCTAGT 0.445064830728  
AATCTATA 0.379045094294  
AATCTATC 0.390062061739  
AATCTATG 0.40387275242  
AATCTCAA 0.411194537751  
AATCTCAC 0.418406551187  
AATCTCAG 0.423016970735  
AATCTCAT 0.421315506378  
AATCTCCA 0.353202046148  
AATCTCCC 0.371378553891  
AATCTCCG 0.430109104645



AATCTCCT 0.398853432567  
AATCTCGA 0.432790957825  
AATCTCGC 0.430421441272  
AATCTCGG 0.435263609025  
AATCTCGT 0.413971766669  
AATCTCTA 0.379360688489  
AATCTCTC 0.349731959961  
AATCTCTG 0.376129182224  
AATCTGAA 0.427205505737  
AATCTGAC 0.439206485261  
AATCTGAG 0.384427527494  
AATCTGAT 0.42951546686  
AATCTGCA 0.420067409527  
AATCTGCC 0.434066508797  
AATCTGCG 0.447778765725  
AATCTGCT 0.340613577991  
AATCTGGA 0.446568530593  
AATCTGGC 0.399951151507  
AATCTGGG 0.459716996208  
AATCTGGT 0.435473336407  
AATCTGTA 0.420590414481  
AATCTGTC 0.38359429023  
AATCTGTG 0.40377580521  
AATCTTAA 0.418658201735  
AATCTTAC 0.405222785582  
AATCTTAG 0.376303517208  
AATCTTAT 0.350408960818  
AATCTTCA 0.380932111051  
AATCTTCC 0.330302899338  
AATCTTCG 0.393577208606  
AATCTTCT 0.390802376767  
AATCTTGA 0.379165507505  
AATCTTGC 0.348694666802  
AATCTTGG 0.398699751573  
AATCTTGT 0.376314518431  
AATCTTTA 0.360874871065  
AATCTTTC 0.406719160868  
AATCTTTG 0.389237380223  
AATGAAAA 0.0350374578085  
AATGAAAC -0.00769834236485  
AATGAAAG -0.107054755713  
AATGAAAT 0.241034097017  
AATGAACA -0.0435547432435  
AATGAACC -0.210202424262  
AATGAACG -0.0077614984355  
AATGAACT 0.01613325004  
AATGAAGA 0.155182833815  
AATGAAGC -0.11745529034  
AATGAAGG -0.169385593802  
AATGAAGT -0.208235294118  
AATGAATA 0.197569479755  
AATGAATC 0.300299275057  
AATGAATG -0.0225026478546  
AATGAATT 0.136517815978

AATGACAA 0.0835979835253  
AATGACAC -0.202917160543  
AATGACAG -0.18802438004  
AATGACAT 0.1447808953  
AATGACCA -0.221895121564  
AATGACCC -0.297481481481  
AATGACCG -0.134899468809  
AATGACCT -0.207270810156  
AATGACGA -0.0658309188287  
AATGACGC -0.241578583424  
AATGACGG -0.0538622463063  
AATGACGT 0.01239284795  
AATGACTA -0.0882761292403  
AATGACTC -0.119775293304  
AATGACTG -0.0582801044822  
AATGAGAA 0.190119431821  
AATGAGAC -0.196511557728  
AATGAGAG -0.107189510198  
AATGAGAT 0.354434209227  
AATGAGCA -0.0953090444126  
AATGAGCC -0.173009269884  
AATGAGCG -0.251967078189  
AATGAGCT -0.266865649964  
AATGAGGA -0.0398355439978  
AATGAGGC -0.134725445975  
AATGAGGG -0.0324976473585  
AATGAGGT 0.155639010358  
AATGAGTA 0.110257634635  
AATGAGTC -0.0181555358622  
AATGAGTG -0.0868787218591  
AATGATAA 0.098882522119  
AATGATAC 0.175871159735  
AATGATAG 0.0498474170673  
AATGATAT 0.25077663615  
AATGATCA 0.0843048145953  
AATGATCC 0.0965743175512  
AATGATCG 0.0861055017216  
AATGATCT 0.133684424622  
AATGATGA 0.00774844413711  
AATGATGC -0.113794901347  
AATGATGG -0.0349437216356  
AATGATGT 0.121876989616  
AATGATTA 0.0940882346484  
AATGATTC 0.233726555577  
AATGATTG 0.136130925573  
AATGCAAA 0.0787166039545  
AATGCAAC 0.0545827021449  
AATGCAAG -0.059856464196  
AATGCAAT 0.319499330391  
AATGCACA 0.0860721420887  
AATGCACC -0.0621996501851  
AATGCACG -0.0545363415803  
AATGCACT -0.00584037141305  
AATGCAGA 0.135491448769

AATGCAGC -0.167220987349  
AATGCAGG -0.113882851435  
AATGCAGT 0.0123136622099  
AATGCATA 0.104660555257  
AATGCATC -0.182268106531  
AATGCATG -0.0867822336362  
AATGCATT 0.065323373481  
AATGCCAA -0.143959849408  
AATGCCAC -0.203531968425  
AATGCCAG 0.102644080601  
AATGCCAT -0.088932599613  
AATGCCCA -0.163892730146  
AATGCCCC -0.0486932623701  
AATGCCCG -0.23665775005  
AATGCCCT -0.0984890967995  
AATGCCGA -0.0735403077012  
AATGCCGC -0.176151053014  
AATGCCGG -0.0392055177383  
AATGCCGT -0.129276655093  
AATGCCTA -0.0513249530772  
AATGCCTC -0.28068239244  
AATGCCTG -0.051518893554  
AATGCGAA 0.14079148083  
AATGCGAC -0.0583397498293  
AATGCGAG 0.0592331963903  
AATGCGAT 0.348926948533  
AATGCGCA -0.0705763552746  
AATGCGCC -0.0070097191754  
AATGCGCG 0.0484491450322  
AATGCGCT 0.0716206722431  
AATGCGGA 0.0275274101146  
AATGCGGC -0.0299787042526  
AATGCGGG -0.0567445847195  
AATGCGGT -0.0948057641016  
AATGCGTA 0.100069679707  
AATGCGTC 0.0354729510136  
AATGCGTG -0.0767341116037  
AATGCTAA 0.094951316165  
AATGCTAC -0.197730415885  
AATGCTAG -0.175614485641  
AATGCTAT 0.176573736435  
AATGCTCA -0.153277901265  
AATGCTCC -0.334206237605  
AATGCTCG -0.190374284601  
AATGCTCT -0.178700182725  
AATGCTGA 0.104470239565  
AATGCTGC -0.116028888837  
AATGCTGG -0.191701925663  
AATGCTGT 0.0846207487688  
AATGCTTA -0.132377957768  
AATGCTTC 0.0525111501751  
AATGCTTG -0.061621191345  
AATGAAA 0.174008106577  
AATGGAAC -0.0764002085563

AATGGAAG -0.214864479237  
AATGGAAT 0.196349875331  
AATGGACA -0.0744912072713  
AATGGACC -0.22454335015  
AATGGACG -0.154028058971  
AATGGACT -0.102341899961  
AATGGAGA 0.12917407627  
AATGGAGC -0.102928830182  
AATGGAGG -0.139455390406  
AATGGAGT -0.0443670552592  
AATGGATA 0.231207051746  
AATGGATC 0.102556913109  
AATGGATG 0.0424484720293  
AATGGCAA -0.119200092979  
AATGGCAC 0.0294466282587  
AATGGCAG -0.00857582845438  
AATGGCAT -0.240091740188  
AATGGCCA -0.197604938272  
AATGGCCC -0.198660016132  
AATGGCCG -0.220260727865  
AATGGCCT -0.139059336264  
AATGGCGA -0.0945478789076  
AATGGCGC -0.0419836016991  
AATGGCGG -0.15597139147  
AATGGCGT -0.0464906648227  
AATGGCTA -0.092425144916  
AATGGCTC -0.107455783578  
AATGGCTG -0.210300435418  
AATGGGAA -0.0659259259259  
AATGGGAC -0.217031550069  
AATGGGAG 0.0202737059259  
AATGGGAT 0.181997007249  
AATGGGCA -0.292936025939  
AATGGGCC -0.28091829178  
AATGGGCG -0.195975308642  
AATGGGCT -0.0582497901131  
AATGGGGA 0.0750817195241  
AATGGGGC -0.100671189691  
AATGGGGG -0.206899005714  
AATGGGGT 0.064645485528  
AATGGGTA -0.0287525931048  
AATGGGTC -0.356660027763  
AATGGGTG 0.0516830589979  
AATGGTAA 0.104234862214  
AATGGTAC 0.137535522351  
AATGGTAG 0.151106300757  
AATGGTAT 0.0839700103186  
AATGGTCA -0.0397033399677  
AATGGTCC -0.102664998299  
AATGGTCG -0.246975159267  
AATGGTCT -0.269603002173  
AATGGTGA 0.181495794168  
AATGGTGC -0.252758850541  
AATGGTGG -0.218078736853

AATGGTGT -0.0100663925733  
AATGGTTA -0.00118233231256  
AATGGTTC -0.147631786936  
AATGGTTG -0.184351488744  
AATGTAAA 0.0704708116534  
AATGTAAC -0.0600928104405  
AATGTAAG 0.122093789106  
AATGTAAT 0.37260446508  
AATGTACA 0.00716536038113  
AATGTACC -0.0533770139323  
AATGTACG -0.0880522604656  
AATGTACT -0.071760638066  
AATGTAGA 0.0298505077506  
AATGTAGC -0.0776361720345  
AATGTAGG 0.0541469934479  
AATGTAGT 0.0457337153395  
AATGTATA 0.0583476549398  
AATGTATC -0.080556104415  
AATGTATG 0.0901587901152  
AATGTCAA -0.0361666614669  
AATGTCAC 0.117791786032  
AATGTCAG 0.0193037404629  
AATGTCAT 0.160206586957  
AATGTCCA -0.130705719664  
AATGTCCC -0.133695121668  
AATGTCCG -0.151114416529  
AATGTCCT -0.0109963994819  
AATGTCGA -0.0398434413275  
AATGTCGC -0.0613268128828  
AATGTCGG -0.0286630692482  
AATGTCGT -0.15743602854  
AATGTCTA 0.0605035236778  
AATGTCTC -0.010615547775  
AATGTCTG -0.184802565831  
AATGTGAA 0.138725611262  
AATGTGAC -0.0222057572514  
AATGTGAG -0.0538796798047  
AATGTGAT 0.150426394317  
AATGTGCA 0.118458967266  
AATGTGCC -0.103564293398  
AATGTGCG 0.0388400403961  
AATGTGCT 0.0139395348161  
AATGTGGA 0.157298098296  
AATGTGGC -0.0443573458228  
AATGTGGG -0.000326845807222  
AATGTGGT -0.0441924658231  
AATGTGTA 0.115982238908  
AATGTGTC -0.050385299348  
AATGTGTG -0.0333213968191  
AATGTTAA 0.15800996615  
AATGTTAC -0.0857277759214  
AATGTTAG -0.0241155129641  
AATGTTAT 0.211853326166  
AATGTTCA 0.0458254035128

AATGTTCC -0.115958915055  
AATGTTCCG -0.0446079642032  
AATGTTCT 0.0365101319458  
AATGTTGA -0.0261106171376  
AATGTTGC -0.0475586730773  
AATGTTGG -0.0315237436607  
AATGTTGT -0.0200005811166  
AATGTTTA 0.151262925641  
AATGTTTC 0.0673238127061  
AATGTTTG -0.00341824964699  
AATTA AAA 0.0961519462557  
AATTA AAC 0.0223248589431  
AATTA AAG 0.208915781674  
AATTA AAT 0.204938637511  
AATTA ACA 0.0543535533162  
AATTA ACC -0.0113390379614  
AATTA ACG 0.0812639586914  
AATTA ACT 0.0311532635184  
AATTA AGA 0.22193860503  
AATTA AGC -0.0806683061501  
AATTA AGG -0.0238165802256  
AATTA AGT 0.134034226877  
AATTA ATA -0.0158833698953  
AATTA ATC 0.192057588657  
AATTA ATG -0.0064024457178  
AATTA ATT 0.184644080427  
AATTA CAA 0.200312350181  
AATTA CAC 0.253630234753  
AATTA CAG 0.137505266369  
AATTA CAT 0.257665417805  
AATTA CCA 0.107040227798  
AATTA CCC 0.0504840940526  
AATTA CCG 0.182471075106  
AATTA CCT 0.245045317594  
AATTA CGA 0.297852044848  
AATTA CGC 0.300645039443  
AATTA CGG 0.202670475751  
AATTA CGT 0.31329998414  
AATTA CTA 0.0655228435311  
AATTA CTC 0.0981113709994  
AATTA CTG 0.112500227499  
AATTA GAA 0.0940553030802  
AATTA GAC -0.0158412389406  
AATTA GAG 0.0650622345155  
AATTA GAT 0.219454599348  
AATTA GCA 0.172784130199  
AATTA GCC -0.139766530408  
AATTA GCG -0.0458071601653  
AATTA GCT -0.10271931991  
AATTA GGA 0.169078904037  
AATTA GGC 0.134050692661  
AATTA GGG 0.0797904454543  
AATTA GGT -0.0216168302268  
AATTA GTA 0.090158400843

AATTAGTC -0.0090973457156  
AATTAGTG 0.12889602371  
AATTATAA 0.176655909021  
AATTATAC 0.238709630555  
AATTATAG 0.128181250272  
AATTATAT 0.247249139221  
AATTATCA 0.0807170979036  
AATTATCC 0.210717243183  
AATTATCG 0.146515291225  
AATTATCT 0.203537547397  
AATTATGA 0.12904711403  
AATTATGC 0.0457624077979  
AATTATGG 0.206283323406  
AATTATGT 0.0848317196865  
AATTATTA 0.217799624543  
AATTATTC 0.125419573238  
AATTATTG 0.0860909738062  
AATTCAAA 0.151393953482  
AATTCAAC -0.00281564908121  
AATTCAAG 0.15699027421  
AATTCAAT -0.0375282423814  
AATTCACA 0.089182514201  
AATTCACC 0.0255535247755  
AATTCACG 0.0806219675514  
AATTCACT 0.152196730218  
AATTCAGA 0.244857844348  
AATTCAGC -0.029949274213  
AATTCAGG -0.0238797169811  
AATTCAGT 0.0817616550201  
AATTCATA 0.0689131666497  
AATTCATC -0.0515987970886  
AATTCATG 0.0829793189752  
AATTCCAA 0.199475542254  
AATTCAC 0.0227297984787  
AATTCAG 0.0672221172984  
AATTCAT 0.159903228406  
AATTCAC 0.196067293304  
AATTCAC 0.25362979966  
AATTCAC 0.346418143099  
AATTCAC 0.257132428813  
AATTCAC 0.11176425388  
AATTCAC 0.122306161289  
AATTCAC 0.110368236453  
AATTCAC 0.215279008615  
AATTCAC 0.142098503186  
AATTCAC 0.0220751674342  
AATTCAC 0.208272958792  
AATTCAC 0.122330786211  
AATTCAC -0.0395288590309  
AATTCAC 0.087799456656  
AATTCAC 0.22175059271  
AATTCAC 0.313382291598  
AATTCAC 0.185957316985  
AATTCAC 0.163262029444

AATTCGCT 0.218992343789  
AATTCGGA 0.19623291154  
AATTCGGC 0.0664695712812  
AATTCGGG 0.0797974808595  
AATTCGGT 0.169902517688  
AATTCGTA 0.192021229884  
AATTCGTC 0.163193526361  
AATTCGTG -0.0585838188078  
AATTCTAA 0.135514941961  
AATTCTAC 0.166447122879  
AATTCTAG -0.00311477749237  
AATTCTAT 0.300671189691  
AATTCTCA 0.304861040489  
AATTCTCC 0.186484680313  
AATTCTCG 0.298932911768  
AATTCTCT 0.258328942458  
AATTCTGA 0.171688730817  
AATTCTGC 0.21227610844  
AATTCTGG 0.0724637891709  
AATTCTGT 0.23149216219  
AATTCTTA 0.179581329996  
AATTCTTC 0.122859448067  
AATTCTTG 0.159937649564  
AATTGAAA 0.189029971089  
AATTGAAC 0.0541724296911  
AATTGAAG 0.123759577598  
AATTGAAT 0.0546773804035  
AATTGACA 0.109794720556  
AATTGACC -0.245442622591  
AATTGACG 0.0814362297154  
AATTGACT -0.124409803437  
AATTGAGA 0.189537640782  
AATTGAGC -0.139801322686  
AATTGAGG -0.0323744758392  
AATTGAGT -0.034191200685  
AATTGATA 0.0232025336684  
AATTGATC -0.051208588553  
AATTGATG 0.125798672149  
AATTGCAA 0.0670562578077  
AATTGCAC 0.0582312454719  
AATTGCAG 0.0228160881688  
AATTGCAT 0.159150036225  
AATTGCCA 0.0123950202549  
AATTGCCC 0.0666322839336  
AATTGCCG 0.0313038685238  
AATTGCCT 0.00218198511253  
AATTGCGA 0.355717461102  
AATTGCGC 0.236719905776  
AATTGCGG 0.239421498409  
AATTGCGT 0.224546642078  
AATTGCTA 0.197487870206  
AATTGCTC 0.0795269929087  
AATTGCTG 0.0486060465184  
AATTGGAA -0.036563211767



AATTGGAC 0.0365333488298  
AATTGGAG -0.00339541800559  
AATTGGAT 0.241660903073  
AATTGGCA -0.165920438957  
AATTGGCC -0.125583964852  
AATTGGCG 0.052956705965  
AATTGGCT -0.0312767568992  
AATTGGGA 0.104272322115  
AATTGGGC -0.247403252303  
AATTGGGG 0.0301323493092  
AATTGGGT 0.0414388899866  
AATTGGTA 0.0502694888681  
AATTGGTC -0.113641712551  
AATTGGTG 0.00846832188049  
AATTGTAA 0.237791466303  
AATTGTAC -0.0125901590752  
AATTGTAG 0.0861142184708  
AATTGTAT 0.197374805689  
AATTGTCA -0.218167552768  
AATTGTCC 0.0681903005554  
AATTGTCCG -0.00464609541373  
AATTGTCT 0.105055714556  
AATTGTGA 0.0974488980576  
AATTGTGC -0.001363915783  
AATTGTGG 0.0792251202002  
AATTGTGT 0.135116877079  
AATTGTTA 0.117151607963  
AATTGTTT 0.183358272921  
AATTGTTG -0.0197245507242  
AATTTAAA 0.174720566174  
AATTTAAC 0.108728371566  
AATTTAAG 0.164899103628  
AATTTAAT 0.200583437617  
AATTTACA 0.170884651694  
AATTTACC 0.153296449977  
AATTTACG 0.26042140623  
AATTTACT 0.181532525412  
AATTTAGA 0.289165080703  
AATTTAGC 0.105608794924  
AATTTAGG 0.156894222248  
AATTTAGT 0.11404704139  
AATTTATA 0.19054479791  
AATTTATC 0.0239870410995  
AATTTATG 0.155932474249  
AATTTCAA 0.27801345285  
AATTTCAC 0.168414859152  
AATTTCAG 0.190816483348  
AATTTCAT 0.296660054028  
AATTTCCA 0.269684844892  
AATTTCCC 0.106561066105  
AATTTCCG 0.261262596325  
AATTTCCT 0.258002371073  
AATTTCGA 0.27372771781  
AATTTCGC 0.124687150102

AATTTCCG 0.177218489978  
AATTTCGT 0.295505938659  
AATTTCTA 0.165914729193  
AATTTCTC 0.118270306394  
AATTTCTG 0.219596377695  
AATTTGAA 0.132851434719  
AATTTGAC 0.150257870498  
AATTTGAG 0.0903779446311  
AATTTGAT 0.0688405270728  
AATTTGCA 0.201760453206  
AATTTGCC 0.174996004823  
AATTTGCG 0.268843432656  
AATTTGCT 0.186041405958  
AATTTGGA 0.145667662748  
AATTTGGC 0.0682744132475  
AATTTGGG 0.158826209137  
AATTTGGT 0.194021822653  
AATTTGTA 0.25462962963  
AATTTGTC 0.122280011041  
AATTTGTG 0.0705620850464  
AATTTTAA 0.224395957537  
AATTTTAC 0.182556148324  
AATTTTAG 0.230568186771  
AATTTTAT 0.212704662008  
AATTTTCA 0.205269274912  
AATTTTCC 0.156286955385  
AATTTTCG 0.206909043009  
AATTTTCT 0.281164119111  
AATTTTGA 0.173813432511  
AATTTTGC 0.0867785355302  
AATTTTGG 0.262555750875  
AATTTTGT 0.188248369241  
AATTTTTA 0.117645605888  
AATTTTTC 0.0886653204132  
AATTTTTG 0.0543329507649  
ACAAAAAA 0.210144569584  
ACAAAAAC 0.0148823245296  
ACAAAAAG -0.00470098136073  
ACAAAAAT 0.205929328855  
ACAAAAACA 0.122133693075  
ACAAAAACC -0.00789592201415  
ACAAAAACG -0.058099085889  
ACAAAAACT -0.102291810728  
ACAAAAAGA -0.0131026476981  
ACAAAAAGC 0.00447895631456  
ACAAAAAGG -0.206614342937  
ACAAAAAGT -0.057767349963  
ACAAAAATA 0.220741504801  
ACAAAAATC 0.460086005259  
ACAAAAATG 0.0511222814638  
ACAAACAA 0.179987486004  
ACAAACAC 0.153782190608  
ACAAACAG -0.0369561111676  
ACAAACAT 0.0512956262966

ACAAACCA 0.0814681911293  
ACAAACCC -0.161799655316  
ACAAACCG 0.0914399939567  
ACAAACCT -0.190755223464  
ACAAACGA 0.13799699225  
ACAAACGC -0.182034583623  
ACAAACGG -0.0415030097381  
ACAAACGT -0.0200369009051  
ACAAACTA 0.0702595007574  
ACAAACTC -0.0541641967991  
ACAAACTG -0.132436460188  
ACAAAGAA 0.0329864541483  
ACAAAGAC -0.0693693431929  
ACAAAGAG -0.0619581183138  
ACAAAGAT 0.156973808426  
ACAAAGCA 0.157963476821  
ACAAAGCC -0.0668993600931  
ACAAAGCG 0.0881655635681  
ACAAAGCT -0.0891731980944  
ACAAAGGA 0.146994900702  
ACAAAGGC -0.399633823021  
ACAAAGGG -0.0471264462447  
ACAAAGGT -0.204766451556  
ACAAAGTA -0.0649115773143  
ACAAAGTC -0.241299068027  
ACAAAGTG 0.0403878241015  
ACAAATAA 0.288798977235  
ACAAATAC 0.132344950823  
ACAAATAG 0.0567735602094  
ACAAATAT 0.335898478927  
ACAAATCA 0.233454631276  
ACAAATCC 0.323750236079  
ACAAATCG 0.271350950852  
ACAAATCT 0.34971162088  
ACAAATGA 0.0607746284486  
ACAAATGC -0.218366484445  
ACAAATGG 0.0375474763442  
ACAAATGT 0.0530930770091  
ACAAATTA 0.203499774817  
ACAAATTC 0.142370030077  
ACAAATTG 0.0668008077521  
ACAACAAA 0.0958421106155  
ACAACAAC 0.0832180728446  
ACAACAAG -0.0185898702496  
ACAACAAT 0.128589540934  
ACAACACA 0.113972949022  
ACAACACC -0.0483067714614  
ACAACACG -0.0128121685819  
ACAACACT -0.0590646928072  
ACAACAGA -0.00908240407691  
ACAACAGC -0.1067294793  
ACAACAGG -0.109179316628  
ACAACAGT -0.0521663483282  
ACAACATA 0.0460026564798

ACAACATC 0.222439000296  
ACAACATG -0.142791592466  
ACAACCAA 0.124880507896  
ACAACCAC -0.0327733582814  
ACAACCAG -0.257496940864  
ACAACCAT -0.261181889509  
ACAACCCA -0.205167039817  
ACAACCCC -0.0432713959874  
ACAACCCG -0.108866608496  
ACAACCCCT -0.312444444444  
ACAACCGA -0.0979457527639  
ACAACCGC -0.125185221772  
ACAACCGG -0.0864999396314  
ACAACCGT -0.0528644728661  
ACAACCTA -0.198632579935  
ACAACCTC -0.0790663725071  
ACAACCTG -0.150964155582  
ACAACGAA -0.06707021229  
ACAACGAC -0.059859369779  
ACAACGAG 0.0415309517237  
ACAACGAT 0.207858149434  
ACAACGCA 0.019416558918  
ACAACGCC -0.144641617204  
ACAACGCG -0.0187206717708  
ACAACGCT -0.171587026751  
ACAACGGA 0.04984009187  
ACAACGGC -0.111612460849  
ACAACGGG -0.167405507316  
ACAACGGT -0.202936819172  
ACAACGTA 0.0740618598637  
ACAACGTC -0.0525096864127  
ACAACGTG -0.233745824256  
ACAACHTAA -0.142418055281  
ACAACHTAC 0.0508869292345  
ACAACHTAG -0.150866563491  
ACAACHTAT 0.120031089739  
ACAACHTCA -0.0310782636726  
ACAACHTCC -0.324743465747  
ACAACHTCG -0.212651024161  
ACAACHTCT -0.0151250127119  
ACAACHTGA 0.00985331160172  
ACAACHTGC 0.0693519096945  
ACAACHTGG -0.142985315422  
ACAACHTGT -0.077167928174  
ACAACHTTA 0.127069200202  
ACAACHTTC -0.0561927838256  
ACAACHTTG -0.0737216485196  
ACAAGAAA -0.0332089866618  
ACAAGAAC -0.00679079415251  
ACAAGAAG -0.205127125167  
ACAAGAAT 0.288694592637  
ACAAGACA -0.223845175785  
ACAAGACC -0.0738918474487  
ACAAGACG -0.137317365826

ACAAGACT -0.176316930355  
ACAAGAGA 0.308876556303  
ACAAGAGC -0.140095860566  
ACAAGAGG -0.198476753274  
ACAAGAGT -0.143514712419  
ACAAGATA 0.327594322491  
ACAAGATC 0.296469187029  
ACAAGATG -0.0287363793072  
ACAAGCAA -0.0142403086587  
ACAAGCAC -0.192793674677  
ACAAGCAG -0.014445981251  
ACAAGCAT -0.163963906384  
ACAAGCCA -0.294899336593  
ACAAGCCC -0.301849941134  
ACAAGCCG -0.267488149904  
ACAAGCCT -0.0421427720592  
ACAAGCGA 0.0971158859526  
ACAAGCGC -0.141306376019  
ACAAGCGG 0.00417366393362  
ACAAGCGT -0.202925391808  
ACAAGCTA -0.195313929809  
ACAAGCTC -0.18766504083  
ACAAGCTG -0.196403308224  
ACAAGGAA -0.0335171921737  
ACAAGGAC -0.098529193889  
ACAAGGAG -0.103015980455  
ACAAGGAT 0.228903287667  
ACAAGGCA -0.221566561871  
ACAAGGCC -0.241889289418  
ACAAGGCG -0.100403920665  
ACAAGGCT -0.270355647732  
ACAAGGGA -0.168428244514  
ACAAGGGC -0.16070203165  
ACAAGGGG 0.107669932219  
ACAAGGGT -0.182207296194  
ACAAGGTA -0.0429125776636  
ACAAGGTC -0.143932416138  
ACAAGGTG -0.190056458117  
ACAAGTAA -0.0853681293049  
ACAAGTAC -0.216249818446  
ACAAGTAG -0.0072497173653  
ACAAGTAT -0.0205410656655  
ACAAGTCA -0.0897228791744  
ACAAGTCC -0.348666877743  
ACAAGTCG -0.0558364197531  
ACAAGTCT -0.199455838047  
ACAAGTGA -0.0478878988708  
ACAAGTGC 0.00119096621937  
ACAAGTGG -0.21651303155  
ACAAGTGT -0.111878878379  
ACAAGTTA 0.00169323146502  
ACAAGTTC -0.0992459415852  
ACAAGTTG -0.146613322796  
ACAATAAA 0.0185596829788

ACAATAAC -0.0978314562339  
ACAATAAG -0.115229231389  
ACAATAAT 0.096121046591  
ACAATACA 0.153985733587  
ACAATACC -0.0233271020262  
ACAATACG 0.125079584623  
ACAATACT 0.131432597737  
ACAATAGA 0.148293595908  
ACAATAGC 0.0150436563857  
ACAATAGG 0.00964071659092  
ACAATAGT 0.121451919864  
ACAATATA 0.178870556983  
ACAATATC 0.389190761597  
ACAATATG 0.162014419539  
ACAATCAA 0.218890645239  
ACAATCAC 0.21855243011  
ACAATCAG 0.186359744451  
ACAATCAT 0.20991239667  
ACAATCCA 0.332510044128  
ACAATCCC 0.277344178796  
ACAATCCG 0.320448857275  
ACAATCCT 0.27743573477  
ACAATCGA 0.176374618543  
ACAATCGC 0.188375708822  
ACAATCGG 0.169001786934  
ACAATCGT 0.127774484621  
ACAATCTA 0.378073613032  
ACAATCTC 0.340131913472  
ACAATCTG 0.411033951738  
ACAATGAA 0.00485191771499  
ACAATGAC -0.381577495222  
ACAATGAG -0.00220668134882  
ACAATGAT 0.113525489228  
ACAATGCA -0.0355454505833  
ACAATGCC -0.0969018413326  
ACAATGCG -0.177219643474  
ACAATGCT -0.159252673922  
ACAATGGA -0.0983621558654  
ACAATGGC -0.100186679216  
ACAATGGG -0.148311850791  
ACAATGGT -0.108883071841  
ACAATGTA 0.0665077206676  
ACAATGTC -0.102762276326  
ACAATGTG -0.0836393073736  
ACAATTAA 0.00363583478767  
ACAATTAC 0.144222974445  
ACAATTAG 0.172918512923  
ACAATTAT 0.180106925457  
ACAATTCA -0.0728712164869  
ACAATTCC 0.0175713721229  
ACAATTCT 0.158321258425  
ACAATTCT 0.0984159915695  
ACAATTGA 0.00621068382898  
ACAATTGC -0.0464810607308

ACAATTGG 0.025696982418  
ACAATTGT -0.178601730105  
ACAATTTA 0.0863822476893  
ACAATTTTC 0.241969694768  
ACAATTTG 0.0943581448187  
ACACAAAA 0.190473446179  
ACACAAAC -0.00273270088475  
ACACAAAG 0.167162552845  
ACACAAAT 0.209354211948  
ACACAACA 0.0535455377508  
ACACAACC -0.182151894689  
ACACAACG -0.0397389882226  
ACACAACT 0.0195095375765  
ACACAAGA 0.0736615906213  
ACACAAGC -0.120112482853  
ACACAAGG -0.0742302452118  
ACACAAGT -0.0169160863338  
ACACAATA 0.254713582148  
ACACAATC 0.376051065885  
ACACAATG -0.193386965326  
ACACACAA -0.0948411016674  
ACACACAC -0.0389503227943  
ACACACAG 0.100178879249  
ACACACAT -0.204074074074  
ACACACCA -0.140787942655  
ACACACCC -0.241273055542  
ACACACCG 0.139399328196  
ACACACCT -0.124887414217  
ACACACGA 0.0555794459053  
ACACACGC -0.290150384238  
ACACACGG -0.268521719092  
ACACACGT -0.187754200851  
ACACACTA 0.131327996746  
ACACACTC -0.110382366015  
ACACACTG -0.118778783432  
ACACAGAA 0.171549983293  
ACACAGAC 0.0121676134025  
ACACAGAG 0.047157313066  
ACACAGAT 0.338333357547  
ACACAGCA -0.000351270060814  
ACACAGCC -0.202204429777  
ACACAGCG -0.101687659504  
ACACAGCT -0.11969168121  
ACACAGGA -0.0296529281013  
ACACAGGC -0.153652392947  
ACACAGGG -0.13099706938  
ACACAGGT -0.196478838461  
ACACAGTA 0.0344732904276  
ACACAGTC -0.119765342465  
ACACAGTG 0.0431755117458  
ACACATAA -0.0461724177002  
ACACATAC 0.0553353769268  
ACACATAG -0.0432983131018  
ACACATAT 0.163611930324

ACACATCA -0.0821258424993  
ACACATCC -0.122902479838  
ACACATCG 0.0417430592884  
ACACATCT -0.0711048224486  
ACACATGA -0.0624814778228  
ACACATGC -0.151007120881  
ACACATGG -0.158074696084  
ACACATGT -0.163645060493  
ACACATTA 0.0939784627544  
ACACATTC 0.0912367614371  
ACACATTG -0.0243041835424  
ACACAAA 0.122184350919  
ACACCAAC -0.0845802511462  
ACACCAAG -0.110424849513  
ACACCAAT 0.0644763412898  
ACACCACA -0.160506110687  
ACACCACC -0.110696804074  
ACACCACG 0.0612801999041  
ACACCACT -0.127042140674  
ACACCAGA 0.144702395653  
ACACCAGC -0.109565614659  
ACACCAGG -0.137668916724  
ACACCAGT -0.278677596168  
ACACCATA -0.00311477749237  
ACACCATC -0.0820847823497  
ACACCATG -0.00171574680749  
ACACCCAA -0.154245073344  
ACACCCAC -0.123283054826  
ACACCCAG -0.230003166147  
ACACCCAT -0.187570079884  
ACACCCCA -0.0966556738774  
ACACCCCC -0.26812149834  
ACACCCCG -0.16426724764  
ACACCCCT -0.175201161946  
ACACCCGA -0.191619550122  
ACACCCGC -0.0950464243382  
ACACCCGG -0.165879247809  
ACACCCGT -0.167934281575  
ACACCCTA -0.0600260159389  
ACACCCTC -0.128812461327  
ACACCCTG -0.225852318114  
ACACCGAA 0.168882686777  
ACACCGAC -0.147488764877  
ACACCGAG 0.0385116014202  
ACACCGAT 0.120946348408  
ACACCGCA -0.0203215422874  
ACACCGCC -0.0796813951447  
ACACCGCG -0.131312118861  
ACACCGCT -0.104736108367  
ACACCGGA -0.0287157990913  
ACACCGGC -0.443740580598  
ACACCGGG -0.125469862019  
ACACCGGT -0.066523414345  
ACACCGTA -0.12037037037



ACACCGTC -0.162626937661  
ACACCGTG -0.227410312273  
ACACCTAA 0.0729516564579  
ACACCTAC -0.211923578497  
ACACCTAG -0.0100489590749  
ACACCTAT 0.0800291993238  
ACACCTCA -0.122298506152  
ACACCTCC 0.00638017617519  
ACACCTCG -0.106111001339  
ACACCTCT -0.236232296592  
ACACCTGA 0.100183051734  
ACACCTGC -0.161793998058  
ACACCTGG -0.173592592593  
ACACCTGT -0.070919729575  
ACACCTTA -0.0585633054513  
ACACCTTC -0.11168278058  
ACACCTTG -0.137549382716  
ACACGAAA 0.17908997138  
ACACGAAC -0.136465674329  
ACACGAAG -0.254608364476  
ACACGAAT 0.268294173164  
ACACGACA -0.0559479900766  
ACACGACC -0.118519250187  
ACACGACG -0.14634541194  
ACACGACT -0.0719735488782  
ACACGAGA 0.159264863403  
ACACGAGC -0.145357197743  
ACACGAGG -0.0816876215435  
ACACGAGT -0.0553426408845  
ACACGATA 0.1589629974  
ACACGATC 0.273059433702  
ACACGATG -0.149850443182  
ACACGCAA 0.0851865800652  
ACACGCAC -0.0564556406246  
ACACGCAG -0.114468095614  
ACACGCAT -0.174251904542  
ACACGCCA -0.137945691594  
ACACGCCC -0.170515613653  
ACACGCCG -0.183944946576  
ACACGCCT -0.11253980059  
ACACGCGA 0.0289207211657  
ACACGCGC -0.278645873944  
ACACGCGG -0.276675006035  
ACACGCGT 0.0817616550201  
ACACGCTA -0.0546220562811  
ACACGCTC -0.188326474623  
ACACGCTG -0.126047376825  
ACACGGAA 0.0742625065174  
ACACGGAC 0.00866620738064  
ACACGGAG -0.170393009041  
ACACGGAT 0.219008780163  
ACACGGCA -0.0162485183722  
ACACGGCC -0.303865781159  
ACACGGCG -0.170595336077

ACACGGCT -0.300709908546  
ACACGGGA 0.0616359949097  
ACACGGGC -0.0960003834612  
ACACGGGG -0.0588537122098  
ACACGGGT -0.0812861691496  
ACACGGTA -0.0823645635088  
ACACGGTC -0.368208467045  
ACACGGTG -0.161549008956  
ACACGTAA 0.145623394586  
ACACGTAC -0.0954353591899  
ACACGTAG 0.035682012988  
ACACGTAT 0.0231334028397  
ACACGTCA -0.226650643136  
ACACGTCC -0.2940845704  
ACACGTCCG -0.0422189292281  
ACACGTCT -0.0997914203461  
ACACGTGA -0.0236597441723  
ACACGTGC -0.0983093681917  
ACACGTGG -0.0972267413485  
ACACGTGT 0.108305352558  
ACACGTTA 0.0575731008594  
ACACGTTC -0.155935654594  
ACACGTTG -0.156043451608  
ACACTAAA 0.149139221013  
ACACTAAC -0.0260049616896  
ACACTAAG 0.0299278285448  
ACACTAAT 0.169048716767  
ACACTACA 0.176919361567  
ACACTACC -0.114162769764  
ACACTACG 0.00207448384866  
ACACTACT -0.0624502825769  
ACACTAGA 0.222960438209  
ACACTAGC -0.238370593529  
ACACTAGG -0.063530483655  
ACACTAGT -0.17758186398  
ACACTATA 0.0665654555228  
ACACTATC 0.136993883748  
ACACTATG -0.0107017023939  
ACACTCAA 0.0869481208141  
ACACTCAC -0.102879085681  
ACACTCAG -0.0786211946005  
ACACTCAT -0.0987427120584  
ACACTCCA -0.307453952891  
ACACTCCC -0.0876317868951  
ACACTCCG -0.158201184257  
ACACTCCT -0.130425475861  
ACACTCGA -0.106694463411  
ACACTCGC -0.0719228919421  
ACACTCGG -0.132083703777  
ACACTCGT -0.0353013816048  
ACACTCTA -0.0675453906782  
ACACTCTC -0.0302108000523  
ACACTCTG -0.0538360960586  
ACACTGAA -0.0372277831854

ACACTGAC -0.133871797938  
ACACTGAG -0.165925889344  
ACACTGAT 0.156479834903  
ACACTGCA -0.126150170169  
ACACTGCC -0.288942884447  
ACACTGCG -0.159532932636  
ACACTGCT -0.164002217173  
ACACTGGA -0.0494350651803  
ACACTGGC -0.234766910567  
ACACTGGG -0.148087196753  
ACACTGGT -0.232386347131  
ACACTGTA 0.120818502753  
ACACTGTC -0.0586971615156  
ACACTGTG -0.00959568811471  
ACACTTAA 0.0284151497102  
ACACTTAC -0.100875387613  
ACACTTAG -0.0210266661243  
ACACTTAT 0.0203462205537  
ACACTTCA -0.0795799896566  
ACACTTCC -0.0336269587668  
ACACTTCG -0.0613726038974  
ACACTTCT 0.097873113187  
ACACTTGA 0.0382609936552  
ACACTTGC -0.162078881371  
ACACTTGG 0.0579823631107  
ACACTTTA 0.0889762178025  
ACACTTTC -0.0407562909909  
ACACTTTG 0.0527494079874  
ACAGAAAA 0.182306417265  
ACAGAAAC 0.0595594853894  
ACAGAAAG -0.0859147365302  
ACAGAAAT 0.264894917515  
ACAGAACA -0.160972921914  
ACAGAACC -0.127475193584  
ACAGAACG -0.046954808793  
ACAGAACT 0.0313962779481  
ACAGAAGA 0.100618889196  
ACAGAAGC -0.00695451309692  
ACAGAAGG -0.160816980552  
ACAGAAGT -0.0450633676369  
ACAGAATA 0.277839117865  
ACAGAATC 0.454167489956  
ACAGAATG -0.161816998629  
ACAGACAA -0.0597741529191  
ACAGACAC -0.169729968447  
ACAGACAG 0.00684634550583  
ACAGACAT -0.0409257063821  
ACAGACCA -0.130579156513  
ACAGACCC -0.235340590908  
ACAGACCG -0.202559186638  
ACAGACCT -0.163206962209  
ACAGACGA 0.120449954994  
ACAGACGC -0.0348172294387  
ACAGACGG -0.0192255975412

ACAGACGT -0.15125137282  
ACAGACTA 0.100438743045  
ACAGACTC -0.262149348084  
ACAGACTG -0.28972329197  
ACAGAGAA 0.0974266521782  
ACAGAGAC -0.100080591699  
ACAGAGAG -0.285234567901  
ACAGAGAT 0.269662807084  
ACAGAGCA -0.0529305629218  
ACAGAGCC -0.228175876998  
ACAGAGCG 0.082241076228  
ACAGAGCT -0.037342553717  
ACAGAGGA -0.0201198160223  
ACAGAGGC -0.2199505051  
ACAGAGGG -0.265981666922  
ACAGAGGT -0.127510051828  
ACAGAGTA 0.179609552504  
ACAGAGTC -0.252290809328  
ACAGAGTG -0.0204920652446  
ACAGATAA 0.155888890503  
ACAGATAC 0.271155788272  
ACAGATAG 0.0685993636773  
ACAGATAT 0.405061398742  
ACAGATCA 0.0383043391218  
ACAGATCC 0.198539217623  
ACAGATCG 0.200338500429  
ACAGATCT 0.353042876902  
ACAGATGA 0.0752833893115  
ACAGATGC -0.0832647258996  
ACAGATGG -0.154580263555  
ACAGATGT 0.0718539375178  
ACAGATTA 0.371082559518  
ACAGATTC 0.448033646652  
ACAGATTG 0.316556012378  
ACAGCAAA 0.155854023506  
ACAGCAAC -0.040348379411  
ACAGCAAG -0.118846886838  
ACAGCAAT 0.203367245858  
ACAGCACA -0.220504631459  
ACAGCACC -0.12280456212  
ACAGCACG -0.195827123263  
ACAGCACT -0.112148548699  
ACAGCAGA 0.0547570700203  
ACAGCAGC -0.0802807548992  
ACAGCAGG -0.164373919486  
ACAGCAGT -0.211943099872  
ACAGCATA -0.0342173617447  
ACAGCATC -0.105708017957  
ACAGCATG -0.0853202046148  
ACAGCCAA -0.100730282977  
ACAGCCAC -0.24831243973  
ACAGCCAG -0.111744949869  
ACAGCCAT -0.0101797103134  
ACAGCCCA -0.177760221213

ACAGCCCC -0.261046238132  
ACAGCCCG -0.290579870107  
ACAGCCCT -0.282918559484  
ACAGCCGA -0.157328756976  
ACAGCCGC -0.27101929607  
ACAGCCGG -0.281508040929  
ACAGCCGT -0.226406106586  
ACAGCCTA -0.0524105907923  
ACAGCCTC -0.220897603486  
ACAGCCTG -0.158313384619  
ACAGCGAA -0.0132712507082  
ACAGCGAC -0.167582638988  
ACAGCGAG -0.167558460421  
ACAGCGAT 0.0340704516016  
ACAGCGCA 0.0431546884004  
ACAGCGCC -0.215431589467  
ACAGCGCG -0.0225033338272  
ACAGCGCT -0.15148696845  
ACAGCGGA 0.19750947046  
ACAGCGGC -0.221093731843  
ACAGCGGG -0.221991746784  
ACAGCGGT -0.188778875011  
ACAGCGTA -0.0224735750272  
ACAGCGTC -0.287041609059  
ACAGCGTG -0.202526901713  
ACAGCTAA -0.170094916022  
ACAGCTAC -0.225871664091  
ACAGCTAG -0.188845546119  
ACAGCTAT 0.0601934180772  
ACAGCTCA -0.130117426267  
ACAGCTCC -0.195250544662  
ACAGCTCG -0.183425724727  
ACAGCTCT -0.145247281961  
ACAGCTGA 0.206521581218  
ACAGCTGC -0.276095298126  
ACAGCTGG -0.0972703186371  
ACAGCTGT -0.028356346399  
ACAGCTTA -0.128975604402  
ACAGCTTC -0.108863400662  
ACAGCTTG -0.21080053336  
ACAGGAAA 0.0941074447299  
ACAGGAAC 0.0707191705636  
ACAGGAAG 0.00503682826551  
ACAGGAAT 0.13309842148  
ACAGGACA -0.104456864972  
ACAGGACC -0.298269947454  
ACAGGACG -0.287399813498  
ACAGGACT -0.144722965494  
ACAGGAGA -0.0403988012909  
ACAGGAGC -0.227416122004  
ACAGGAGG -0.224233096857  
ACAGGAGT -0.122900767794  
ACAGGATA 0.218743825941  
ACAGGATC 0.30246393445

ACAGGATG -0.154835916982  
ACAGGCAA -0.0884386447552  
ACAGGCAC -0.233754121474  
ACAGGCAG -0.16652189323  
ACAGGCAT 0.0582806428242  
ACAGGCCA -0.321092831109  
ACAGGCCC -0.229933982184  
ACAGGCCG -0.235004746462  
ACAGGCCT -0.271078231354  
ACAGGCCGA 0.00674756056066  
ACAGGCCG -0.198587875073  
ACAGGCCG -0.145324618736  
ACAGGCCG -0.251963059904  
ACAGGCTA -0.063838952544  
ACAGGCTC -0.238905579176  
ACAGGCTG -0.223689913804  
ACAGGGAA 0.202154489852  
ACAGGGAC -0.208388669565  
ACAGGGAG -0.156261319108  
ACAGGGAT 0.108606337077  
ACAGGGCA -0.138613544983  
ACAGGGCC -0.246269229925  
ACAGGGCG -0.156433470508  
ACAGGGCT -0.267915283429  
ACAGGGGA -0.108608122986  
ACAGGGGC -0.159001778129  
ACAGGGGG -0.337527292277  
ACAGGGGT -0.0551652178208  
ACAGGGTA 0.066460854532  
ACAGGGTC -0.266131254061  
ACAGGGTG -0.254993773213  
ACAGGTAA -0.0441442776241  
ACAGGTAC 0.00139821949988  
ACAGGTAG -0.120012955061  
ACAGGTAT 0.176980518065  
ACAGGTCA 0.0186173132231  
ACAGGTCC -0.243703703704  
ACAGGTCC -0.360085734699  
ACAGGTCT -0.0299333168684  
ACAGGTGA -0.126122417616  
ACAGGTGC -0.0249481952176  
ACAGGTGG -0.0954403292181  
ACAGGTTA -0.0826373415681  
ACAGGTTC -0.181203081786  
ACAGGTTG 0.034754868064  
ACAGTAAA -0.00577484636729  
ACAGTAAC -0.0254198879137  
ACAGTAAG 0.105421818023  
ACAGTAAT 0.238301060396  
ACAGTACA -0.0185404728973  
ACAGTACC -0.00938364282892  
ACAGTACG -0.156925208963  
ACAGTACT -0.0445252134486  
ACAGTAGA 0.0250773891853

ACAGTAGC -0.081475811054  
ACAGTAGG -0.0382467700371  
ACAGTAGT -0.0746890070323  
ACAGTATA 0.117757405419  
ACAGTATC 0.281281118619  
ACAGTATG -0.10306773843  
ACAGTCAA 0.00695673142572  
ACAGTCAC -0.18716872428  
ACAGTCAG -0.0163866116845  
ACAGTCAT -0.0804298667369  
ACAGTCCA -0.107799071422  
ACAGTCCC -0.256470994896  
ACAGTCCG -0.237305555556  
ACAGTCCT -0.288855967078  
ACAGTCGA 0.021133758517  
ACAGTCGC -0.246448250922  
ACAGTCGG 0.0213512682889  
ACAGTCGT -0.225276225442  
ACAGTCTA -0.0838652971685  
ACAGTCTC -0.314850101811  
ACAGTCTG -0.237594544039  
ACAGTGAA -0.202133080293  
ACAGTGAC -0.125469182141  
ACAGTGAG -0.0620514727673  
ACAGTGAT -0.0227282706536  
ACAGTGCA -0.0689954188006  
ACAGTGCC -0.19974691358  
ACAGTGCG -0.0136120924071  
ACAGTGCT -0.159536703263  
ACAGTGGA 0.050385299348  
ACAGTGGC -0.0997304151549  
ACAGTGGG -0.306786472738  
ACAGTGGT -0.197295994098  
ACAGTGTA 0.255329565761  
ACAGTGTC -0.0307196645371  
ACAGTGTG -0.269001966497  
ACAGTTAA 0.0621257245798  
ACAGTTAC -0.0777528046719  
ACAGTTAG 0.00331511119893  
ACAGTTAT 0.127634525456  
ACAGTTCA 0.0453906781708  
ACAGTTCC -0.0277067836315  
ACAGTTCG 0.0523618318215  
ACAGTTCT -0.169229080933  
ACAGTTGA 0.00984485865159  
ACAGTTGC -0.113767409127  
ACAGTTGG -0.293636810141  
ACAGTTTA -0.120867579511  
ACAGTTTC -0.0411452501701  
ACAGTTTG -0.129686011109  
ACATAAAA 0.0740531431145  
ACATAAAC 0.0260214274737  
ACATAAAG -0.0622716049383  
ACATAAAT 0.165446806038

ACATAACA 0.00320921650952  
ACATAACC -0.0740960284529  
ACATAACG 0.197970866539  
ACATAACT -0.099720315124  
ACATAAGA 0.111892551538  
ACATAAGC -0.0515132055588  
ACATAAGG -0.0628488171087  
ACATAAGT -0.144319399941  
ACATAATA 0.149031811895  
ACATAATC 0.311575842982  
ACATAATG -0.120130244352  
ACATACAA 0.252855438007  
ACATACAC 0.0398252431447  
ACATACAG 0.144363762102  
ACATACAT 0.107367849055  
ACATACCA 0.019716312881  
ACATACCC -0.11533732903  
ACATACCG -0.0183968606789  
ACATACCT -0.0441198262461  
ACATACGA -0.0910157997803  
ACATACGC -0.233190579403  
ACATACGG 0.0531542953742  
ACATACGT -0.0347100954484  
ACATACTA -0.0571594599303  
ACATACTC -0.14527360727  
ACATACTG -0.00853622076926  
ACATAGAA 0.0701451338747  
ACATAGAC 0.066306650422  
ACATAGAG -0.0463780790396  
ACATAGAT 0.212475120945  
ACATAGCA -0.0969571532317  
ACATAGCC -0.164588822048  
ACATAGCG 0.0109854222925  
ACATAGCT -0.155953826754  
ACATAGGA 0.0559687940377  
ACATAGGC -0.258230297255  
ACATAGGG -0.0460191222639  
ACATAGGT 0.0642828503524  
ACATAGTA 0.0538273793093  
ACATAGTC 0.0424268370326  
ACATAGTG -0.102909944538  
ACATATAA 0.0344994406753  
ACATATAC 0.0617421876135  
ACATATAG -0.205551132831  
ACATATAT 0.20290704779  
ACATATCA 0.176563958431  
ACATATCC 0.233615518815  
ACATATCG 0.182692894397  
ACATATCT 0.334532854881  
ACATATGA 0.0947468660124  
ACATATGC 0.0137659322201  
ACATATGG -0.0557750776559  
ACATATGT 0.0306673968962  
ACATATTA 0.183560561154



ACATATTC 0.133594351546  
ACATATTG 0.0766194098663  
ACATCAAA -0.166500324886  
ACATCAAC 0.106390919669  
ACATCAAG 0.111369075062  
ACATCAAT 0.0748725175425  
ACATCACA -0.142736013698  
ACATCACC -0.138386463529  
ACATCACG -0.0236256558871  
ACATCACT -0.0809392886738  
ACATCAGA 0.108702943448  
ACATCAGC -0.0293362195459  
ACATCAGG 0.0167923554853  
ACATCAGT -0.116923604372  
ACATCATA -0.0999884739511  
ACATCATC 0.00868624061133  
ACATCATG -0.132595775506  
ACATCCAA 0.0214068833263  
ACATCCAC 0.121335696541  
ACATCCAG 0.20437864161  
ACATCCAT -0.0175902261211  
ACATCCCA -0.00213506333838  
ACATCCCC -0.204535748215  
ACATCCCG 0.0648065819228  
ACATCCCT -0.0673527071156  
ACATCCGA 0.0352155520947  
ACATCCGC -0.0667344296729  
ACATCCGG 0.209953074833  
ACATCCGT 0.0879679804745  
ACATCCTA -0.053725109223  
ACATCCTC -0.0290834338181  
ACATCCTG 0.093657112141  
ACATCGAA 0.0775318887352  
ACATCGAC -0.120845954607  
ACATCGAG 0.0716920239742  
ACATCGAT 0.205174647083  
ACATCGCA 0.00277174032361  
ACATCGCC -0.123197078723  
ACATCGCG -0.0124141037003  
ACATCGCT -0.0720511963738  
ACATCGGA 0.160828064803  
ACATCGGC -0.11704569224  
ACATCGGG 0.0026862115555  
ACATCGGT 0.0127994028409  
ACATCGTA -0.0425599354541  
ACATCGTC -0.0227177933638  
ACATCGTG -0.113495905508  
ACATCTAA 0.154814046412  
ACATCTAC 0.0369601967112  
ACATCTAG 0.120992837738  
ACATCTAT -0.0964580942281  
ACATCTCA -0.168267805986  
ACATCTCC -0.13605247483  
ACATCTCG -0.13853529557

ACATCTCT 0.0629322268326  
ACATCTGA 0.18041201168  
ACATCTGC 0.0796805653416  
ACATCTGG 0.0698313309023  
ACATCTTA 0.135799689103  
ACATCTTC -0.0892900207749  
ACATCTTG -0.185169874895  
ACATGAAA 0.08302257236  
ACATGAAC 0.0413538476736  
ACATGAAG -0.121774872912  
ACATGAAT 0.104666366423  
ACATGACA 0.00957759775187  
ACATGACC -0.0952686685105  
ACATGACG -0.0606452535389  
ACATGACT -0.138952684348  
ACATGAGA 0.204412127904  
ACATGAGC -0.127154170637  
ACATGAGG -0.0775089410486  
ACATGAGT 0.0683406598834  
ACATGATA 0.240147972513  
ACATGATC 0.146794415469  
ACATGATG -0.0963228231937  
ACATGCAA 0.0934653436578  
ACATGCAC -0.159295686662  
ACATGCAG -0.0928021939712  
ACATGCAT 0.0502672945619  
ACATGCCA -0.148776987498  
ACATGCCC -0.13612654321  
ACATGCCG -0.223089163237  
ACATGCCT -0.164595233784  
ACATGCGA 0.0572185997497  
ACATGCGC -0.0903069316168  
ACATGCGG -0.190569879373  
ACATGCGT -0.194940623148  
ACATGCTA 0.0266773145404  
ACATGCTC -0.222137178411  
ACATGCTG -0.0920590414481  
ACATGGAA -0.0941336277658  
ACATGGAC -0.164196380068  
ACATGGAG 0.00580332888823  
ACATGGAT 0.341525060923  
ACATGGCA -0.183655030562  
ACATGGCC -0.343035670205  
ACATGGCG 0.102974044256  
ACATGGCT -0.0786904537068  
ACATGGGA 0.176132087807  
ACATGGGC -0.129088115035  
ACATGGGG -0.0730248895475  
ACATGGGT -0.0929217681343  
ACATGGTA -0.0691058800286  
ACATGGTC -0.389378834913  
ACATGGTG -0.0766022369302  
ACATGTAA 0.234615469055  
ACATGTAC -0.0954475842308

ACATGTAG -0.152062543227  
ACATGTAT -0.158840317225  
ACATGTCA -0.143653816542  
ACATGTCC -0.0936097116577  
ACATGTCCG -0.164785946196  
ACATGTCT -0.196213125406  
ACATGTGA 0.213406166985  
ACATGTGC -0.135829299615  
ACATGTGG -0.281223764137  
ACATGTTA 0.0694028085082  
ACATGTTC -0.135702759665  
ACATGTTG -0.112903137281  
ACATTAAG 0.0208467104613  
ACATTAAC 0.0392379635118  
ACATTAAG -0.0188935539639  
ACATTAAT -0.00324608636644  
ACATTACA 0.148052532942  
ACATTACC 0.112982145192  
ACATTACG 0.121864512661  
ACATTACT 0.117744395857  
ACATTAGA 0.0839178686689  
ACATTAGC 0.0469247403895  
ACATTAGG 0.0867486170108  
ACATTAGT -0.0425976235559  
ACATTATA -0.0491668313245  
ACATTATC 0.193370052032  
ACATTATG 0.0741932883882  
ACATTCAA 0.129901315067  
ACATTCAC -0.0733907440339  
ACATTCAG 0.0381292673824  
ACATTCAT 0.0872648293696  
ACATTCBA -0.111367881638  
ACATTCBC 0.0743418453028  
ACATTCBG 0.0884096291023  
ACATTCCT -0.0126727005942  
ACATTCGA 0.0896369843465  
ACATTCGC -0.0139235270878  
ACATTCGG 0.0450197860434  
ACATTCGT -0.235693977914  
ACATTCTA 0.0925181235744  
ACATTCTC 0.110713187995  
ACATTCTG -0.0210274116849  
ACATTGAA 0.0184060023272  
ACATTGAC -0.0441692211585  
ACATTGAG 0.129648839711  
ACATTGAT 0.0865297168509  
ACATTGCA 0.0255539926732  
ACATTGCC -0.0409977772289  
ACATTGCG 0.00857318492173  
ACATTGCT -0.0451629014907  
ACATTGGA 0.120148082285  
ACATTGGC -0.108963804506  
ACATTGGG -0.0497962136111  
ACATTGGT 0.00923830139613

ACATTGTA -0.140423782729  
ACATTGTC -0.0623888559573  
ACATTGTG -0.138494918321  
ACATTTAA 0.0417188083163  
ACATTTAC 0.0372277831854  
ACATTTAG -0.0850188136504  
ACATTTAT 0.0110005159279  
ACATTTCA -0.0358157166848  
ACATTTCC 0.105953539727  
ACATTTCT 0.139540113932  
ACATTTCT -0.146147127178  
ACATTTGA -0.143062965158  
ACATTTGC -0.0517179259948  
ACATTTGG -0.00798002250213  
ACATTTTA 0.193953215219  
ACATTTTC 0.109162659993  
ACATTTTG -0.034229221449  
ACCAAAAA 0.177076402307  
ACCAAAAC -0.0159059474412  
ACCAAAAG -0.108317692384  
ACCAAAAT 0.281136797734  
ACCAACA 0.0132799674575  
ACCAACC -0.125042532407  
ACCAACG -0.157611380026  
ACCAAACT 0.103829558497  
ACCAAAGA 0.303118426903  
ACCAAAGC -0.181480201062  
ACCAAAGG -0.182534195842  
ACCAAAGT 0.0343512559383  
ACCAAATA 0.0596559789636  
ACCAAATC 0.403520113899  
ACCAAATG 0.00630333964491  
ACCAACAA 0.00989652788067  
ACCAACAC -0.0436047309349  
ACCAACAG 0.0496038916637  
ACCAACAT 0.0758749437043  
ACCAACCA -0.249196159122  
ACCAACCC -0.305378914863  
ACCAACCG -0.139568627451  
ACCAACCT -0.0804018421397  
ACCAACGA -0.208601548652  
ACCAACGC -0.148888979267  
ACCAACGG -0.159988696287  
ACCAACGT -0.0232634086369  
ACCAACTA -0.0708259002504  
ACCAACTC -0.1224086039  
ACCAACTG -0.188949891068  
ACCAAGAA -0.0438387780193  
ACCAAGAC -0.27815632252  
ACCAAGAG -0.00101980928695  
ACCAAGAT 0.243015763244  
ACCAAGCA 0.00407808287205  
ACCAAGCC -0.260032645853  
ACCAAGCG -0.13222003701

ACCAAGCT -0.242065574378  
ACCAAGGA -0.0753848686919  
ACCAAGGC -0.20825  
ACCAAGGG -0.220424110385  
ACCAAGGT -0.149492860545  
ACCAAGTA -0.084159285236  
ACCAAGTC -0.192689104677  
ACCAAGTG -0.16627741467  
ACCAATAA -0.140542244457  
ACCAATAC -0.132968833523  
ACCAATAG -0.207100640424  
ACCAATAT 0.226453928736  
ACCAATCA -0.142151293711  
ACCAATCC 0.0967893306989  
ACCAATCG 0.0140854408411  
ACCAATCT 0.192571989529  
ACCAATGA -0.00607218709869  
ACCAATGC -0.181622295762  
ACCAATGG -0.135197671345  
ACCAATTA -0.0734566071703  
ACCAATTC 0.00997003227294  
ACCAATTG -0.175227182932  
ACCACAAA 0.0868028416603  
ACCACAAC 0.0438234567722  
ACCACAAG 0.0431623087225  
ACCACAAT 0.0466302500254  
ACCACACA -0.0193033875606  
ACCACACC -0.027975367187  
ACCACACG -0.216893611089  
ACCACACT -0.122851639668  
ACCACAGA -0.188727063587  
ACCACAGC -0.284362139918  
ACCACAGG 0.0739703339968  
ACCACAGT -0.0700123771725  
ACCACATA -0.0248151322767  
ACCACATC -0.0970767744627  
ACCACATG -0.118033605514  
ACCACCAA -0.0551261749452  
ACCACCAC -0.294004566774  
ACCACCAG -0.0519673693262  
ACCACCAT -0.115542713513  
ACCACCCA -0.0642097869094  
ACCACCCC -0.0961711563371  
ACCACCCG -0.208403651817  
ACCACCCCT -0.11046090535  
ACCACCGA -0.115491732657  
ACCACCGC -0.0470444268844  
ACCACCGG -0.0354193235396  
ACCACCGT -0.201242433721  
ACCACCTA -0.0132597897972  
ACCACCTC -0.216029999971  
ACCACCTG -0.0787947139078  
ACCACGAA -0.0871371464429  
ACCACGAC -0.202753967124

ACCACGAG -0.00454779175733  
ACCACGAT -0.0544415359203  
ACCACGCA -0.27743853727  
ACCACGCC -0.25948696845  
ACCACGCG 0.107708518555  
ACCACGCT -0.147021056546  
ACCACGGA 0.187365071986  
ACCACGGC -0.246968449931  
ACCACGGG -0.199494237914  
ACCACGGT -0.00782909360336  
ACCACGTA -0.0427151153838  
ACCACGTC -0.204203703704  
ACCACGTG -0.0954282264482  
ACCACTAA 0.00444118373455  
ACCACTAC -0.0855115320032  
ACCACTAG -0.164087664137  
ACCACTAT -0.0863410410838  
ACCACTCA 0.0917655775573  
ACCACTCC -0.197333941479  
ACCACTCG -0.0955370792126  
ACCACTCT -0.210951844191  
ACCACTGA 0.0835631165284  
ACCACTGC -0.14913147108  
ACCACTGG -0.182481729297  
ACCACTTA -9.05618125535E-5  
ACCACTTC -0.0798746590716  
ACCACTTG -0.108443616078  
ACCAGAAA 0.131320116797  
ACCAGAAC -0.0189494024101  
ACCAGAAG -0.18866500952  
ACCAGAAT 0.0521101797103  
ACCAGACA -0.185135802469  
ACCAGACC -0.0998082788671  
ACCAGACG -0.130833546378  
ACCAGACT -0.147028319427  
ACCAGAGA 0.0627562361077  
ACCAGAGC -0.0955878722038  
ACCAGAGG -0.302779423706  
ACCAGAGT -0.221849108368  
ACCAGATA 0.270601440207  
ACCAGATC 0.112358897622  
ACCAGATG 0.122298897331  
ACCAGCAA -0.0314426669611  
ACCAGCAC -0.0905365159153  
ACCAGCAG -0.128282379283  
ACCAGCAT 0.00906578629608  
ACCAGCCA -0.0464949055634  
ACCAGCCC -0.115551301751  
ACCAGCCG 0.0107201487659  
ACCAGCCT -0.223434722497  
ACCAGCGA 0.0624179378447  
ACCAGCGC -0.236492315557  
ACCAGCGG -0.17652546605  
ACCAGCGT -0.153242135414

ACCAGCTA -0.0820023555901  
ACCAGCTC -0.330994179224  
ACCAGCTG -0.187231441695  
ACCAGGAA -0.0167338986307  
ACCAGGAC -0.131324211358  
ACCAGGAG -0.0897488038625  
ACCAGGAT 0.296275042494  
ACCAGGCA -0.275996148719  
ACCAGGCC -0.334049796099  
ACCAGGCG 0.150662867216  
ACCAGGCT -0.201463302224  
ACCAGGGA -0.0427088992049  
ACCAGGGC -0.350503384451  
ACCAGGGG -0.147625272331  
ACCAGGGT -0.223108323869  
ACCAGGTA -0.139514514878  
ACCAGGTC -0.399409847873  
ACCAGGTG -0.244442249874  
ACCAGTAA -0.0930672115975  
ACCAGTAC -0.152944662654  
ACCAGTAG -0.130858710562  
ACCAGTAT 0.100581116616  
ACCAGTCA -0.237261775452  
ACCAGTCC -0.112728635508  
ACCAGTCG -0.208322681107  
ACCAGTCT -0.116654998213  
ACCAGTGA -0.198831895838  
ACCAGTGC -0.20422093388  
ACCAGTGG -0.239825079005  
ACCAGTTA -0.0917394273096  
ACCAGTTC -0.190328934181  
ACCAGTTG 0.0860866154316  
ACCATAAA 0.120931820493  
ACCATAAC 0.0073313139295  
ACCATAAG -0.0832376912237  
ACCATAAT 0.246668423017  
ACCATACA 0.0328083913239  
ACCATACC 0.0625782124745  
ACCATACG 0.0494504923079  
ACCATACT -0.101664899104  
ACCATAGA 0.00746686424632  
ACCATAGC -0.305047960841  
ACCATAGG -0.052435605015  
ACCATAGT -0.24730014487  
ACCATATA 0.0919689683727  
ACCATATC 0.33461711679  
ACCATATG 0.0394899341423  
ACCATCAA -0.182104951221  
ACCATCAC -0.128664647063  
ACCATCAG -0.0734840501438  
ACCATCAT 0.0624660426751  
ACCATCCA -0.096416203779  
ACCATCCC 0.0689887118097  
ACCATCCG -0.152078927185

ACCATCCT -0.197437881382  
ACCATCGA -0.104985153204  
ACCATCGC 0.0759717968982  
ACCATCGG -0.274318756618  
ACCATCGT -0.202799681564  
ACCATCTA 0.0701716832422  
ACCATCTC -0.0302576180363  
ACCATCTG -0.0221307331586  
ACCATGAA 0.135050048669  
ACCATGAC -0.0829272174476  
ACCATGAG -0.0605507279219  
ACCATGAT 0.0490535063124  
ACCATGCA -0.0878750196117  
ACCATGCC -0.139636891794  
ACCATGCG -0.245953921762  
ACCATGCT -0.139728560923  
ACCATGGA -0.0403716142061  
ACCATGGC -0.312663221191  
ACCATGGG -0.244049382716  
ACCATGGT -0.149229781772  
ACCATGTA 0.0330016125986  
ACCATGTC -0.218326797386  
ACCATGTG -0.224403292181  
ACCATTAA -0.0378321444656  
ACCATTAC -0.029937675243  
ACCATTAG -0.0593072612065  
ACCATTAT 0.167849458825  
ACCATTCA 0.080463424874  
ACCATTCC 0.0291967515581  
ACCATTCG -0.113590577421  
ACCATTCT 0.00617101024569  
ACCATTGA -0.166773188928  
ACCATTGC -0.0333924135226  
ACCATTGG -0.264127403303  
ACCATTTA 0.0450097417744  
ACCATTTTC -0.0874662451426  
ACCATTTG -0.103112960585  
ACCCAAAA 0.193780599422  
ACCCAAAC 0.0671996092121  
ACCCAAAG -0.0674153385731  
ACCCAAAT 0.00706027034686  
ACCCAACA -0.0502851324947  
ACCCAACC -0.156277783266  
ACCCAACG 0.0615652698883  
ACCCAACT -0.0951909164337  
ACCCAAGA 0.117065970911  
ACCCAAGC -0.267607699838  
ACCCAAGG -0.295895866245  
ACCCAAGT -0.262814721424  
ACCCAATA 0.118531691146  
ACCCAATC 0.160684098443  
ACCCAATG -0.0210779067534  
ACCCACAA -0.0606101982476  
ACCCACAC -0.09574876083



ACCCACAG -0.145835754294  
ACCCACAT -0.151039275732  
ACCCACCA -0.161991076867  
ACCCACCC -0.056685926877  
ACCCACCG -0.219449415483  
ACCCACCT -0.0749159080558  
ACCCACGA 0.0348645535689  
ACCCACGC -0.277670781893  
ACCCACGG -0.169797136758  
ACCCACGT -0.138524059668  
ACCCACTA -0.0207647494661  
ACCCACTC -0.285405103274  
ACCCACTG -0.254974582426  
ACCCAGAA 0.0677841445476  
ACCCAGAC -0.114862332546  
ACCCAGAG 0.0187261600944  
ACCCAGAT 0.302368050208  
ACCCAGCA -0.200765767639  
ACCCAGCC -0.143996893762  
ACCCAGCG -0.112749132973  
ACCCAGCT -0.141172984405  
ACCCAGGA -0.0950773975121  
ACCCAGGC -0.240660061981  
ACCCAGGG -0.263597408084  
ACCCAGGT -0.263866541976  
ACCCAGTA -0.128443515428  
ACCCAGTC -0.093041698223  
ACCCAGTG -0.0846039430064  
ACCCATAA 0.0774413269227  
ACCCATAC -0.063034779172  
ACCCATAG -0.121034801355  
ACCCATAT 0.0508070256999  
ACCCATCA -0.249982169994  
ACCCATCC -0.195529653227  
ACCCATCG -0.165363285914  
ACCCATCT -0.132128507056  
ACCCATGA -0.0938837476211  
ACCCATGC -0.195467380947  
ACCCATGG -0.194839781332  
ACCCATTA 0.0866220487998  
ACCCATTC -0.221216505568  
ACCCATTG -0.193387291701  
ACCCCAAA -0.0823156425961  
ACCCCAAC -0.0908706579693  
ACCCCAAG -0.000939863276767  
ACCCCAAT -0.361803185851  
ACCCCACA -0.163353824343  
ACCCCACC -0.156600823045  
ACCCCACG -0.19863033591  
ACCCCACT -0.0991998814639  
ACCCCAGA -0.137509115366  
ACCCCAGC -0.157869752995  
ACCCCAGG -0.320268342312  
ACCCCAGT -0.19735160507

ACCCATA -0.0758229334738  
ACCCATC -0.297464052288  
ACCCATG -0.123605962451  
ACCCCAA -0.154800061348  
ACCCCAC -0.235665294925  
ACCCCAG -0.167123721433  
ACCCCAT -0.0926249444417  
ACCCCCA -0.361301412136  
ACCCCCC -0.320450862284  
ACCCCCG -0.201275690999  
ACCCCCCT -0.296181995743  
ACCCCCGA -0.112450262067  
ACCCCCGC -0.248364722148  
ACCCCCGG -0.302545902334  
ACCCCCGT -0.209873244182  
ACCCCCTA -0.172332402762  
ACCCCCTC -0.212223048414  
ACCCCCTG -0.405404306484  
ACCCCGAA -0.0870471894327  
ACCCCGAC -0.195576187576  
ACCCCGAG -0.295860146919  
ACCCCGAT 0.244433629219  
ACCCCGCA -0.121343585015  
ACCCCGCC -0.248848010105  
ACCCCGCG -0.196223681828  
ACCCCGCT -0.0961580364847  
ACCCCGGA -0.0611737978479  
ACCCCGGC -0.32776550311  
ACCCCGGG -0.169588910291  
ACCCCGGT -0.251647986026  
ACCCCGTA 0.00159508632061  
ACCCCGTC -0.256567252617  
ACCCCGTG -0.0915592811587  
ACCCCTAA -0.158868336561  
ACCCCTAC -0.245398193844  
ACCCCTAG -0.219334661956  
ACCCCTAT -0.0506040408853  
ACCCCTCA -0.133068299669  
ACCCCTCC -0.294167024898  
ACCCCTCG -0.192005486968  
ACCCCTCT -0.204302668181  
ACCCCTGA -0.133675446573  
ACCCCTGC -0.249833688229  
ACCCCTGG -0.213724715642  
ACCCCTTA -0.124260312056  
ACCCCTTC -0.337728338682  
ACCCCTTG -0.0829708976493  
ACCCGAAA -0.104608732393  
ACCCGAAC -0.247239092151  
ACCCGAAG -0.211532595655  
ACCCGAAT 0.128701349643  
ACCCGACA -0.201585632277  
ACCCGACC -0.303602080737  
ACCCGACG -0.235760279523

ACCCGACT -0.203359544736  
ACCCGAGA 0.0860324261583  
ACCCGAGC -0.0748700072622  
ACCCGAGG -0.200504801097  
ACCCGAGT -0.160770466515  
ACCCGATA 0.193045486903  
ACCCGATC -0.005181233397  
ACCCGATG -0.178433115727  
ACCCGCAA 0.0810104597561  
ACCCGCAC -0.214804113641  
ACCCGCAG -0.188751147309  
ACCCGCAT -0.0820904736036  
ACCCGCCA -0.160719066892  
ACCCGCCC 0.101539001954  
ACCCGCCG -0.143142677853  
ACCCGCCT -0.194240064962  
ACCCGCGA -0.068846305808  
ACCCGCGC -0.125725091281  
ACCCGCGG -0.104923331906  
ACCCGCGT -0.178134877519  
ACCCGCTA -0.180535664313  
ACCCGCTC -0.270733478577  
ACCCGCTG -0.147032828775  
ACCCGGAA -0.0447720649973  
ACCCGGAC -0.165901756486  
ACCCGGAG -0.0973840714238  
ACCCGGAT 0.234264088446  
ACCCGGCA -0.341482212897  
ACCCGGCC -0.0548156734912  
ACCCGGCG -0.265286418046  
ACCCGGCT -0.246621081893  
ACCCGGGA -0.23348166049  
ACCCGGGC -0.243961069418  
ACCCGGGG -0.110935528121  
ACCCGGGT -0.192483795091  
ACCCGGTA -0.0107733699031  
ACCCGGTC -0.288562914427  
ACCCGGTG -0.213571152623  
ACCCGTAA -0.0203265459844  
ACCCGTAC -0.264039087233  
ACCCGTAG -0.262254377445  
ACCCGTAT 0.0859596258974  
ACCCGTCA -0.238063798374  
ACCCGTCC -0.349539779709  
ACCCGTCC -0.209510171835  
ACCCGTCT -0.213497942387  
ACCCGTGA -0.157005427416  
ACCCGTGC -0.181762183236  
ACCCGTGG -0.185638344227  
ACCCGTTA -0.133628590558  
ACCCGTTC -0.0531544139842  
ACCCGTTG -0.338452400661  
ACCCTAAA -0.0186804320622  
ACCCTAAC -0.188972294928

ACCCTAAG -0.0203709192298  
ACCCTAAT -0.0417126268363  
ACCCTACA -0.0880980995813  
ACCCTACC -0.168390374276  
ACCCTACG -0.191800259682  
ACCCTACT 0.0414466898145  
ACCCTAGA 0.119792831927  
ACCCTAGC -0.160324405359  
ACCCTAGG 0.00939280187033  
ACCCTAGT -0.0382849771342  
ACCCTATA 0.106786098487  
ACCCTATC -0.048214560144  
ACCCTATG -0.181527256035  
ACCCTCAA -0.0925608526783  
ACCCTCAC -0.190342691798  
ACCCTCAG -0.0777070211728  
ACCCTCAT -0.0472369005877  
ACCCTCCA -0.333311550068  
ACCCTCCC -0.0777844280061  
ACCCTCCG -0.157779643531  
ACCCTCCT -0.225552154307  
ACCCTCGA -0.170076985969  
ACCCTCGC -0.287299927378  
ACCCTCGG 0.108147845779  
ACCCTCGT 0.0441735740081  
ACCCTCTA -0.171426039921  
ACCCTCTC -0.322937581603  
ACCCTCTG -0.133835222073  
ACCCTGAA -0.122423601467  
ACCCTGAC -0.0999495676859  
ACCCTGAG -0.146381956407  
ACCCTGAT -0.0131721925579  
ACCCTGCA -0.163149576415  
ACCCTGCC -0.071803751133  
ACCCTGCG -0.191266274916  
ACCCTGCT -0.348273979287  
ACCCTGGA -0.0652937617307  
ACCCTGGC -0.0860070420899  
ACCCTGGG -0.220474881636  
ACCCTGTA -0.173472551473  
ACCCTGTC -0.260478220554  
ACCCTGTG -0.139825350852  
ACCCTTAA -0.18601016703  
ACCCTTAC -0.238455907769  
ACCCTTAG -0.168072982872  
ACCCTTAT -0.140833696442  
ACCCTTCA -0.324978939724  
ACCCTTCC 0.00473595539531  
ACCCTTCG -0.250821551814  
ACCCTTCT -0.19878420787  
ACCCTTGA -0.193932784636  
ACCCTTGC -0.0968298652267  
ACCCTTGG -0.127439198384  
ACCCTTTA -0.174056883271

ACCCTTTC -0.330141831614  
ACCCTTTG -0.159845501457  
ACCGAAAA 0.147961478562  
ACCGAAAC -0.0265510884854  
ACCGAAAG 0.0108556387439  
ACCGAAAT 0.315786032862  
ACCGAACA -0.25109475833  
ACCGAACC -0.0984035255249  
ACCGAACG -0.160083747681  
ACCGAACT -0.112614837499  
ACCGAAGA 0.0190747213095  
ACCGAAGC -0.194314606676  
ACCGAAGG -0.132384891543  
ACCGAAGT -0.0488438374313  
ACCGAATA 0.140782764081  
ACCGAATC 0.374956091242  
ACCGAATG -0.0688124306326  
ACCGACAA 0.15474409077  
ACCGACAC -0.051452429238  
ACCGACAG -0.0740842959072  
ACCGACAT -0.05675060067  
ACCGACCA -0.176791560039  
ACCGACCC -0.33269671505  
ACCGACCG -0.083724337762  
ACCGACCT -0.173340440922  
ACCGACGA -0.105790181389  
ACCGACGC -0.2158155538  
ACCGACGG -0.390537315889  
ACCGACGT 0.049721686383  
ACCGACTA -0.0771571403486  
ACCGACTC -0.170374302504  
ACCGACTG -0.197068990559  
ACCGAGAA 0.0604535615185  
ACCGAGAC -0.107201646091  
ACCGAGAG 0.0499913563173  
ACCGAGAT 0.248457861781  
ACCGAGCA -0.0373110831234  
ACCGAGCC -0.377734443567  
ACCGAGCG 0.00252349890314  
ACCGAGCT -0.30034215938  
ACCGAGGA -0.0958613196365  
ACCGAGGC -0.013190534207  
ACCGAGGG -0.133276260406  
ACCGAGGT -0.222827271063  
ACCGAGTA -0.0510097356471  
ACCGAGTC -0.151213837306  
ACCGAGTG -0.211675227183  
ACCGATAA 0.0545758414016  
ACCGATAC 0.104074732705  
ACCGATAG -0.0427419214253  
ACCGATAT 0.356923313355  
ACCGATCA -0.0570512112778  
ACCGATCC 0.0237848251334  
ACCGATCG -0.0770633271832

ACCGATCT 0.0580538561738  
ACCGATGA 0.105246257966  
ACCGATGC -0.0446312088678  
ACCGATGG -0.215297668038  
ACCGATTA 0.149057864687  
ACCGATTC 0.276487958023  
ACCGATTG 0.108278006189  
ACCGCAAA 0.114578188284  
ACCGCAAC 0.0341885432859  
ACCGCAAG -0.0323038255325  
ACCGCAAT 0.299291037729  
ACCGCACA 0.000965895943237  
ACCGCACC -0.118809708024  
ACCGCACG -0.0965971491827  
ACCGCACT -0.0805656913101  
ACCGCAGA 0.0525332527558  
ACCGCAGC -0.0451107598411  
ACCGCAGG -0.256839506173  
ACCGCAGT -0.147273783588  
ACCGCATA -0.125621702652  
ACCGCATC -0.176708810747  
ACCGCATG -0.245389347073  
ACCGCCAA -0.125939183339  
ACCGCCAC -0.189188188238  
ACCGCCAG -0.152497777558  
ACCGCCAT -0.0746567223155  
ACCGCCCA -0.275890838207  
ACCGCCCC -0.279023697852  
ACCGCCCG -0.00312786018334  
ACCGCCCT -0.0130550479107  
ACCGCCGA -0.0562718171639  
ACCGCCGC -0.139047454447  
ACCGCCGG -0.0678546422273  
ACCGCCGT -0.117396743872  
ACCGCCTA -0.0490980508369  
ACCGCCTC -0.282261460496  
ACCGCCTG -0.188274796389  
ACCGCGAA 0.0169439077187  
ACCGCGAC -0.0732403205281  
ACCGCGAG -0.250566392862  
ACCGCGAT 0.279419755059  
ACCGCGCA -0.175656096678  
ACCGCGCC 0.0725575422306  
ACCGCGCG 0.0357407498889  
ACCGCGCT -0.184320599999  
ACCGCGGA 0.0405951244142  
ACCGCGGC -0.166373231764  
ACCGCGGG -0.000867069469825  
ACCGCGGT -0.0519306735137  
ACCGCGTA 0.0290340389058  
ACCGCGTC -0.122266128811  
ACCGCGTG -0.281760348584  
ACCGCTAA -0.131645673829  
ACCGCTAC -0.257863809195

ACCGCTAG -0.128817370488  
ACCGCTAT -0.191680247584  
ACCGCTCA 0.0143979057592  
ACCGCTCC -0.0885308641975  
ACCGCTCG -0.0825270228817  
ACCGCTCT -0.105098074898  
ACCGCTGA -0.194534997311  
ACCGCTGC -0.210428565942  
ACCGCTGG -0.241757938548  
ACCGCTTA -0.138990019322  
ACCGCTTC -0.139778511167  
ACCGCTTG -0.0172991959606  
ACCGGAAA -0.123225502786  
ACCGGAAC -0.220705075446  
ACCGGAAG -0.229373426159  
ACCGGAAT 0.206908023768  
ACCGGACA -0.0553266601775  
ACCGGACC -0.192694957527  
ACCGGACG -0.238194482771  
ACCGGACT -0.241514403292  
ACCGGAGA 0.0803669751427  
ACCGGAGC -0.276469426404  
ACCGGAGG -0.225539578794  
ACCGGAGT -0.136121464241  
ACCGGATA 0.207597428091  
ACCGGATC 0.249774967617  
ACCGGATG 0.101956135151  
ACCGGCAA -0.176119360299  
ACCGGCAC -0.139278440669  
ACCGGCAG -0.279754505002  
ACCGGCAT -0.112533309069  
ACCGGCCA -0.16217350516  
ACCGGCCC -0.394423873392  
ACCGGCCG -0.0944655734466  
ACCGGCCT -0.23075804469  
ACCGGCGA 0.0746421436255  
ACCGGCGC -0.154708468066  
ACCGGCGG -0.0463745587146  
ACCGGCGT -0.108156086747  
ACCGGCTA -0.279105689719  
ACCGGCTC -0.31523814226  
ACCGGCTG -0.1560229991  
ACCGGAA -0.188504588462  
ACCGGAC -0.264797920728  
ACCGGAG -0.341378906057  
ACCGGAT 0.159734229116  
ACCGGCA -0.123124453495  
ACCGGCC -0.268088598402  
ACCGGCG -0.29311631173  
ACCGGCT -0.326196197185  
ACCGGGA -0.0769776801146  
ACCGGGC -0.177194975387  
ACCGGGG -0.154590396301  
ACCGGTA -0.0137153206553

ACCGGGTC -0.246297027748  
ACCGGGTG -0.0282360754352  
ACCGGTAA 0.0552674043338  
ACCGGTAC -0.292743781297  
ACCGGTAG -0.1699128179  
ACCGGTAT 0.0610698435067  
ACCGGTCA -0.0121709587477  
ACCGGTCC -0.127893575686  
ACCGGTCCG -0.255875962868  
ACCGGTCT -0.139836996789  
ACCGGTGA -0.171449504429  
ACCGGTGC -0.19375308642  
ACCGGTGG -0.272077943451  
ACCGGTGA -0.135725315462  
ACCGGTTC -0.0911754537346  
ACCGGTTG -0.286368231347  
ACCGTAAA -0.0795567461401  
ACCGTAAC -0.00693237879959  
ACCGTAAG 0.112671247803  
ACCGTAAT 0.317009283338  
ACCGTACA 0.0712858679664  
ACCGTACC -0.0257654380531  
ACCGTACG -0.0521779032644  
ACCGTACT -0.0913964123632  
ACCGTAGA -0.0645106464574  
ACCGTAGC -0.281833113299  
ACCGTAGG -0.0535415397617  
ACCGTAGT -0.145383999034  
ACCGTATA 0.0388880655997  
ACCGTATC 0.311343396336  
ACCGTATG -0.0523490771327  
ACCGTCAA -0.180150145701  
ACCGTCAC -0.211885985852  
ACCGTCAG -0.0417383270969  
ACCGTCAT -0.14445277296  
ACCGTCCA -0.157364877101  
ACCGTCCC -0.128240174533  
ACCGTCCG 0.0759098107013  
ACCGTCCT -0.175288307916  
ACCGTCGA -0.121436371918  
ACCGTCGC -0.183961894137  
ACCGTCGG -0.111528161904  
ACCGTCGT -0.162976820932  
ACCGTCTA -0.24110906772  
ACCGTCTC -0.22636051557  
ACCGTCTG -0.228134138781  
ACCGTGAA -0.157714768711  
ACCGTGAC -0.278798303513  
ACCGTGAG -0.104469523606  
ACCGTGAT 0.0976057995438  
ACCGTGCA 0.0323717315419  
ACCGTGCC -0.169335813198  
ACCGTGCG -0.121642163722  
ACCGTGCT -0.0820231574971



ACCGTGGA -0.113040066292  
ACCGTGGC -0.343215851537  
ACCGTGGG -0.241627370136  
ACCGTGTA 0.0704051835602  
ACCGTGTC -0.163654469738  
ACCGTGTG -0.269220323919  
ACCGTTAA 0.139315532062  
ACCGTTAC -0.0413275609083  
ACCGTTAG 0.117631078117  
ACCGTTAT 0.0336725284858  
ACCGTTCA -0.125551198257  
ACCGTTCC -0.0593828541543  
ACCGTTCCG -0.352207520051  
ACCGTTCT -0.151827860841  
ACCGTTGA -0.0518742625065  
ACCGTTGC -0.134898455407  
ACCGTTGG -0.0943495105141  
ACCGTTTA 0.123294059535  
ACCGTTTC -0.209295753006  
ACCGTTTG -0.0923058149467  
ACCTAAAA 0.178378103526  
ACCTAAAC -0.0781224579915  
ACCTAAAG -0.0714078193138  
ACCTAAAT 0.19240044746  
ACCTAACA -0.0699631166436  
ACCTAACC 0.0152473160772  
ACCTAACG -0.160103775682  
ACCTAACT -0.0943887111816  
ACCTAAGA -0.157481399835  
ACCTAAGC -0.170788194101  
ACCTAAGG -0.0886446584891  
ACCTAAGT -0.0588119076535  
ACCTAATA -0.00276625172891  
ACCTAATC 0.0674320167855  
ACCTAATG 0.0725482447474  
ACCTACAA -0.106039827766  
ACCTACAC -0.307430634427  
ACCTACAG -0.258729845236  
ACCTACAT 0.108486207878  
ACCTACCA -0.114068264343  
ACCTACCC -0.0947089332152  
ACCTACCG -0.164867118748  
ACCTACCT -0.288401073304  
ACCTACGA -0.0114760846299  
ACCTACGC -0.198462959681  
ACCTACGG -0.0685219023162  
ACCTACGT -0.197719278027  
ACCTACTA -0.00145714991356  
ACCTACTC -0.0616610139726  
ACCTACTG 0.0244269907133  
ACCTAGAA -0.0220766167102  
ACCTAGAC -0.234656594085  
ACCTAGAG -0.232880174292  
ACCTAGAT 0.306116252379

ACCTAGCA -0.167247085556  
ACCTAGCC -0.0665160606105  
ACCTAGCG -0.251700785263  
ACCTAGCT -0.145713282185  
ACCTAGGA -0.133185712012  
ACCTAGGC -0.0525038969022  
ACCTAGGG 0.0360765138771  
ACCTAGGT 0.0295810307908  
ACCTAGTA -0.070735831624  
ACCTAGTC -0.179952795858  
ACCTAGTG -0.217159041394  
ACCTATAA 0.00349623482404  
ACCTATAC -0.0313806842504  
ACCTATAG 0.0815714944346  
ACCTATAT 0.0691165574652  
ACCTATCA -0.0331953605795  
ACCTATCC -0.168702432493  
ACCTATCG -0.0744344561889  
ACCTATCT 0.0806640817939  
ACCTATGA -0.12971130073  
ACCTATGC -0.187577503429  
ACCTATGG -0.23298986607  
ACCTATTA -0.026748662715  
ACCTATTC -0.0782097301807  
ACCTATTG -0.123781531977  
ACCTCAAA 0.114780701117  
ACCTCAAC -0.0940002085357  
ACCTCAAG -0.000856220773233  
ACCTCAAT -0.0261965326484  
ACCTCACA -0.132804010669  
ACCTCACC -0.129665675041  
ACCTCACG -0.0829830376518  
ACCTCACT -0.152790406498  
ACCTCAGA -0.0867192679154  
ACCTCAGC -0.198265795207  
ACCTCAGG -0.144729006225  
ACCTCAGT -0.150635802469  
ACCTCATA -0.0233507184054  
ACCTCATC -0.184999694974  
ACCTCATG -0.184148527306  
ACCTCCAA -0.188070596369  
ACCTCCAC -0.208617283951  
ACCTCCAG -0.317889276773  
ACCTCCAT -0.180628698074  
ACCTCCCA -0.34261162996  
ACCTCCCC -0.0167544466223  
ACCTCCCG -0.15317707486  
ACCTCCCT -0.250360876094  
ACCTCCGA -0.257454046639  
ACCTCCGC -0.229053016225  
ACCTCCGG -0.125467580642  
ACCTCCGT -0.243677559913  
ACCTCCTA -0.262273177505  
ACCTCCTC -0.22722285313

ACCTCCTG -0.216375308642  
ACCTCGAA 0.00688269775407  
ACCTCGAC -0.202826434277  
ACCTCGAG -0.190451105953  
ACCTCGAT 0.137703352434  
ACCTCGCA -0.0172700482376  
ACCTCGCC -0.260657099457  
ACCTCGCG -0.171341794657  
ACCTCGCT -0.255648834019  
ACCTCGGA -0.0461248031258  
ACCTCGGC -0.276746278647  
ACCTCGGG -0.0790174063831  
ACCTCGTA -0.0302166112185  
ACCTCGTC -0.238609053498  
ACCTCGTG -0.124911751632  
ACCTCTAA -0.186020160118  
ACCTCTAC -0.158253066601  
ACCTCTAG -0.197693211066  
ACCTCTAT -0.0786149085468  
ACCTCTCA -0.206720282543  
ACCTCTCC -0.202143975461  
ACCTCTCG -0.13182646297  
ACCTCTCT -0.368283314448  
ACCTCTGA -0.0199109773318  
ACCTCTGC -0.201615192811  
ACCTCTGG -0.391489326684  
ACCTCTTA -0.141713445383  
ACCTCTTC -0.243185858187  
ACCTCTTG -0.137566268234  
ACCTGAAA 0.052993476966  
ACCTGAAC -0.21815311141  
ACCTGAAG -0.140346544948  
ACCTGAAT 0.0578254616245  
ACCTGACA -0.13698032436  
ACCTGACC -0.0689121699947  
ACCTGACG -0.247182098765  
ACCTGACT -0.337225184308  
ACCTGAGA 0.00577674592197  
ACCTGAGC -0.329712954653  
ACCTGAGG -0.209397587561  
ACCTGAGT -0.135462563655  
ACCTGATA -0.00220367077214  
ACCTGATC 0.0274504961283  
ACCTGATG 0.141312103449  
ACCTGCAA -0.0710342422966  
ACCTGCAC -0.167568321411  
ACCTGCAG -0.217141973496  
ACCTGCAT 0.0645112082867  
ACCTGCCA -0.248562414266  
ACCTGCCC -0.346836172139  
ACCTGCCG -0.247116882832  
ACCTGCCT -0.330738381694  
ACCTGCGA -0.108536500337  
ACCTGCGC -0.127484690602

ACCTGCGG -0.275609846427  
ACCTGCGT -0.0821364752372  
ACCTGCTA -0.167395895979  
ACCTGCTC -0.12545136579  
ACCTGCTG -0.237296923609  
ACCTGGAA -0.0921124117153  
ACCTGGAC -0.315837554481  
ACCTGGAG -0.0814404778159  
ACCTGGAT 0.237134804527  
ACCTGGCA -0.115072897976  
ACCTGGCC -0.134079086  
ACCTGGCG -0.177843205038  
ACCTGGCT -0.379794512592  
ACCTGGGA -0.276535163515  
ACCTGGGC -0.237818445897  
ACCTGGGG -0.253918276772  
ACCTGGTA -0.225163382554  
ACCTGGTC -0.275872185911  
ACCTGGTG -0.293493646718  
ACCTGTAA -0.0743683160032  
ACCTGTAC -0.0852544603558  
ACCTGTAG -0.169158319195  
ACCTGTAT 0.180359711185  
ACCTGTCA -0.148575301568  
ACCTGTCC -0.208148148148  
ACCTGTCCG -0.0464344122845  
ACCTGTCT 0.00931093331577  
ACCTGTGA -0.132075422654  
ACCTGTGC -0.138064026915  
ACCTGTGG -0.0950425253176  
ACCTGTTA 0.0746516932285  
ACCTGTTC -0.162997821351  
ACCTGTTG -0.145437748391  
ACCTTAAA -0.0397527348801  
ACCTTAAC -0.0922111917815  
ACCTTAAG -0.184090372785  
ACCTTAAT 0.000507024247091  
ACCTTACA -0.177156305842  
ACCTTACC -0.0106852817689  
ACCTTACG -0.183921219992  
ACCTTACT -0.0377944631057  
ACCTTAGA -0.0637175006319  
ACCTTAGC -0.111562481136  
ACCTTAGG 0.020066302224  
ACCTTAGT -0.185883224616  
ACCTTATA 0.041968241977  
ACCTTATC -0.165997513189  
ACCTTATG -0.185336206045  
ACCTTCAA -0.171480164219  
ACCTTCAC -0.0816003951593  
ACCTTCAG -0.226549608385  
ACCTTCAT -0.0705225788458  
ACCTTCCA -0.19844516234  
ACCTTCCC -0.265580849231

ACCTTCCG -0.106681929909  
ACCTTCCT -0.157552812071  
ACCTTCGA -0.0654339603021  
ACCTTCGC -0.0203530515777  
ACCTTCGG -0.208331154684  
ACCTTCGT -0.289126919469  
ACCTTCTA -0.105078144289  
ACCTTCTC -0.230483816986  
ACCTTCTG -0.162400176625  
ACCTTGAA -0.0374980024116  
ACCTTGAC -0.0667454307721  
ACCTTGAG -0.073918579253  
ACCTTGAT 0.163649702904  
ACCTTGCA -0.117516314043  
ACCTTGCC -0.175784972227  
ACCTTGCG -0.00855397484028  
ACCTTGCT -0.236400762161  
ACCTTGGA 0.00936614705156  
ACCTTGGC -0.245559890047  
ACCTTGGG -0.120186556927  
ACCTTGTA -0.0424867875136  
ACCTTGTC -0.201963334266  
ACCTTGTG -0.12899490759  
ACCTTTAA 0.179444115129  
ACCTTTAC 0.0306030537678  
ACCTTTAG -0.157630075881  
ACCTTTAT 0.0355441392786  
ACCTTTCA -0.0286156349425  
ACCTTTCC -0.26715177923  
ACCTTTCCG -0.177833104795  
ACCTTTCT -0.131667949966  
ACCTTTGA 0.15341719906  
ACCTTTGC -0.167525805018  
ACCTTTGG -0.204743701836  
ACCTTTTA 0.0097483577814  
ACCTTTTC 0.107061271362  
ACCTTTTG -0.134770639937  
ACGAAAAA 0.0945739752794  
ACGAAAAC -0.0895848426969  
ACGAAAAG 0.04638908663  
ACGAAAAT 0.253070868735  
ACGAAACA 0.0518980721456  
ACGAAACC -0.0950017286512  
ACGAAACG -0.0821148653099  
ACGAAACT 0.00179710313367  
ACGAAAGA 0.252846241233  
ACGAAAGC -0.231839981124  
ACGAAAGG -0.0451367803234  
ACGAAAGT 0.184468923577  
ACGAAATA 0.210248852884  
ACGAAATC 0.484003490746  
ACGAAATG 0.113932270858  
ACGAACAA 0.0585742826407  
ACGAACAC -0.025906166985

ACGAACAG -0.180529086388  
ACGAACAT -0.0785015908067  
ACGAACCA 0.0107860546986  
ACGAACCC -0.186963897208  
ACGAACCG -0.0649767283585  
ACGAACCT -0.0720726654044  
ACGAACGA -0.0142388098732  
ACGAACGC -0.235440196692  
ACGAACGG -0.17207133059  
ACGAACGT -0.265196828892  
ACGAACTA -0.0846527101826  
ACGAACTC -0.128880174292  
ACGAACTG -0.0073380500632  
ACGAAGAA 0.017554080165  
ACGAAGAC -0.162140885984  
ACGAAGAG 0.100616918044  
ACGAAGAT 0.305462496186  
ACGAAGCA -0.168588287577  
ACGAAGCC -0.00129530834925  
ACGAAGCG -0.108553825955  
ACGAAGCT -0.214850116055  
ACGAAGGA -0.0357491740481  
ACGAAGGC -0.25221161833  
ACGAAGGG -0.252858105518  
ACGAAGTA 0.0136265115549  
ACGAAGTC -0.244887879087  
ACGAAGTG -0.106824730386  
ACGAATAA 0.0971438118344  
ACGAATAC 0.149677471355  
ACGAATAG -0.00372641029739  
ACGAATAT 0.281485323498  
ACGAATCA 0.234678914349  
ACGAATCC 0.366097499396  
ACGAATCG 0.251281117258  
ACGAATCT 0.423092121511  
ACGAATGA 0.160682974415  
ACGAATGC -0.208104465429  
ACGAATGG -0.17158720557  
ACGAATTA 0.112428373839  
ACGAATTC 0.124105359064  
ACGAATTG 0.127148784825  
ACGACAAA -0.0486865792882  
ACGACAAC 0.136095194186  
ACGACAAG -0.0925706447188  
ACGACAAT 0.14488835297  
ACGACACA -0.16204847048  
ACGACACC 0.0777548559557  
ACGACACG -0.194190548386  
ACGACACT -0.0495348645756  
ACGACAGA -0.0177667629336  
ACGACAGC -0.102636647424  
ACGACAGG -0.0158127454854  
ACGACAGT -0.0852268985049  
ACGACATA 0.00458297657468

ACGACATC 0.0997058113241  
ACGACATG -0.104957328284  
ACGACCAA -0.0458544593436  
ACGACCAC -0.239543726236  
ACGACCAG -0.184317307804  
ACGACCAT -0.118185185185  
ACGACCCA -0.105140976515  
ACGACCCC -0.37420317523  
ACGACCCG -0.204659404503  
ACGACCCT -0.227371487828  
ACGACCGA -0.0286240096488  
ACGACCGC -0.182335478844  
ACGACCGG -0.181233821133  
ACGACCGT -0.112957840781  
ACGACCTA -0.0239268366375  
ACGACCTC -0.240516678464  
ACGACCTG -0.123047204067  
ACGACGAA -0.195023810019  
ACGACGAC -0.146703317806  
ACGACGAG -0.2590015713  
ACGACGAT 0.211414583121  
ACGACGCA -0.109544194726  
ACGACGCC -0.0715273319836  
ACGACGCG -0.149714909753  
ACGACGCT -0.0467202274137  
ACGACGGA 0.0166853278886  
ACGACGGC 0.00797179001674  
ACGACGGG -0.246831104553  
ACGACGTA -0.0534557347726  
ACGACGTC 0.0871921897927  
ACGACGTG -0.00645025426637  
ACGACTAA 0.0262072231471  
ACGACTAC 0.0208621484555  
ACGACTAG -0.144810457516  
ACGACTAT -0.0421801391445  
ACGACTCA -0.0118718303366  
ACGACTCC -0.0564397339911  
ACGACTCG -0.0579478737997  
ACGACTCT -0.184855019975  
ACGACTGA -0.147881062926  
ACGACTGC -0.00610606160399  
ACGACTGG -0.161148429868  
ACGACTTA 0.0117307122395  
ACGACTTC -0.188304443579  
ACGACTTG -0.100883297256  
ACGAGAAA 0.0639475251696  
ACGAGAAC 0.0331144250668  
ACGAGAAG -0.111315198064  
ACGAGAAT 0.340707260313  
ACGAGACA -0.0265653884254  
ACGAGACC -0.157130490104  
ACGAGACG -0.144896637636  
ACGAGACT -0.256243106655  
ACGAGAGA 0.0543939680095

ACGAGAGC -0.129413798212  
ACGAGAGG -0.0837517766692  
ACGAGAGT -0.141818731789  
ACGAGATA 0.273255175745  
ACGAGATC 0.405469933478  
ACGAGATG -0.1161843145  
ACGAGCAA -0.0754463702003  
ACGAGCAC -0.203186770733  
ACGAGCAG -0.0154024270843  
ACGAGCAT -0.00193366553833  
ACGAGCCA -0.145913580247  
ACGAGCCC -0.276943882113  
ACGAGCCG -0.334628345018  
ACGAGCCT -0.0999163030652  
ACGAGCGA -0.0739986170791  
ACGAGCGC -0.0507046795604  
ACGAGCGG -0.371619208039  
ACGAGCGT -0.25027017919  
ACGAGCTA -0.164548592249  
ACGAGCTC -0.222161718188  
ACGAGCTG -0.13387879721  
ACGAGGAA 0.116138663857  
ACGAGGAC -0.306223560976  
ACGAGGAG -0.10478803601  
ACGAGGAT 0.249896125405  
ACGAGGCA -0.14888879852  
ACGAGGCC -0.175483789552  
ACGAGGCG -0.126693666551  
ACGAGGCT -0.0648811189579  
ACGAGGGA -0.180514802388  
ACGAGGGC -0.215163857039  
ACGAGGGG -0.184835390947  
ACGAGGTA -0.0994863943898  
ACGAGGTC -0.0976674624736  
ACGAGGTG -0.0220482509577  
ACGAGTAA -0.0272467562405  
ACGAGTAC -0.0382505484288  
ACGAGTAG -0.143723096758  
ACGAGTAT -0.00487992677931  
ACGAGTCA -0.0644929853156  
ACGAGTCC -0.151484224966  
ACGAGTCG -0.130978468545  
ACGAGTCT -0.166475904402  
ACGAGTGA 0.131104266849  
ACGAGTGC -0.0959550470391  
ACGAGTGG -0.0855846956751  
ACGAGTTA -0.0792168873082  
ACGAGTTC -0.220271604938  
ACGAGTTG -0.0955023188167  
ACGATAAA 0.0704735559507  
ACGATAAC 0.0822497929772  
ACGATAAG 0.0684096126796  
ACGATAAT 0.0742195218336  
ACGATACA 0.0717286766522



ACGATACC 0.00732178533008  
ACGATACG 0.215555039007  
ACGATACT 0.246797463451  
ACGATAGA -0.0251789573988  
ACGATAGC -0.112711954728  
ACGATAGG -0.18140281551  
ACGATAGT 0.0627097467784  
ACGATATA 0.151608966629  
ACGATATC 0.452776398339  
ACGATATG 0.12187322941  
ACGATCAA 0.0339444743074  
ACGATCAC 0.147822991879  
ACGATCAG 0.094406573141  
ACGATCAT 0.154627434192  
ACGATCCA 0.214875012351  
ACGATCCC 0.0741262157237  
ACGATCCG 0.224670135459  
ACGATCCT 0.254504380166  
ACGATCGA 0.188151770621  
ACGATCGC 0.193388345706  
ACGATCGG 0.168623350677  
ACGATCGT 0.160070658688  
ACGATCTA 0.233521436333  
ACGATCTC 0.311607804396  
ACGATCTG 0.242211082713  
ACGATGAA -0.169666720896  
ACGATGAC -0.0242787273985  
ACGATGAG 0.0218078537911  
ACGATGAT 0.184186364099  
ACGATGCA -0.141993907961  
ACGATGCC -0.230265360446  
ACGATGCG -0.128807753654  
ACGATGCT 0.0236412767132  
ACGATGGA 0.131159472927  
ACGATGGC -0.0726574074074  
ACGATGGG -0.100184186673  
ACGATGTA -0.125301817442  
ACGATGTC -0.0308863481179  
ACGATGTG 0.070191623204  
ACGATTAA -0.0552763508841  
ACGATTAC 0.376147116292  
ACGATTAG -0.00429208105557  
ACGATTAT 0.127143957114  
ACGATTCA 0.0509392297299  
ACGATTCC 0.388523897341  
ACGATTCG 0.341997297808  
ACGATTCT 0.378055583804  
ACGATTGA -0.0353420597678  
ACGATTGC 0.393934595325  
ACGATTGG -0.00642569697674  
ACGATTTA 0.239651039472  
ACGATTTTC 0.394588794485  
ACGATTTTG 0.285440123197  
ACGCAAAA 0.17902614809

ACGCAAAC 0.0716647538245  
ACGCAAAG -0.0822413187585  
ACGCAAAT 0.150554239972  
ACGCAACA 0.0127133787573  
ACGCAACC -0.0357355499107  
ACGCAACG -0.0852778487926  
ACGCAACT 0.0604822459746  
ACGCAAGA 0.0376160837779  
ACGCAAGC 0.15838769195  
ACGCAAGG 0.0012700946656  
ACGCAAGT -0.142470749403  
ACGCAATA 0.281518255066  
ACGCAATC 0.480648281277  
ACGCAATG 0.0808936529891  
ACGCACAA -0.0349410893031  
ACGCACAC 0.028325238056  
ACGCACAG -0.203895130433  
ACGCACAT 0.162721957424  
ACGCACCA -0.327923605504  
ACGCACCC -0.101077884235  
ACGCACCG -0.0576796417045  
ACGCACCT -0.20378804823  
ACGCACGA 0.0485363125245  
ACGCACGC -0.176254165057  
ACGCACGG -0.0612448545026  
ACGCACGT -0.0674509093703  
ACGCACTA 0.0752357154272  
ACGCACTC -0.141295637665  
ACGCACTG -0.0718323153499  
ACGCAGAA -0.0999983536656  
ACGCAGAC 0.0120017780412  
ACGCAGAG 0.030126538143  
ACGCAGAT 0.257380907414  
ACGCAGCA -0.185372665866  
ACGCAGCC -0.222586980268  
ACGCAGCG -0.0991935296442  
ACGCAGCT -0.27175797884  
ACGCAGGA -0.0715571359586  
ACGCAGGC -0.296072428576  
ACGCAGGG -0.222336324524  
ACGCAGTA -0.0504319524029  
ACGCAGTC -0.158782282356  
ACGCAGTG -0.146638820371  
ACGCATAA -0.0328403527378  
ACGCATAC 0.128155941953  
ACGCATAG -0.236142338417  
ACGCATAT 0.101945157962  
ACGCATCA -0.0303958374498  
ACGCATCC -0.149670555698  
ACGCATCG -0.200847945995  
ACGCATCT -0.139751970405  
ACGCATGA -0.121561042524  
ACGCATGC -0.10456902939  
ACGCATGG -0.141699346405

ACGCATTA 0.034752226403  
ACGCATTC -0.0934816131882  
ACGCATTG -0.0307903276883  
ACGCCAAA -0.196112482853  
ACGCCAAC -0.165582991235  
ACGCCAAG 0.0475865097006  
ACGCCAAT 0.0552859820144  
ACGCCACA -0.0492830473755  
ACGCCACC -0.119475762057  
ACGCCACG -0.129456790123  
ACGCCACT -0.351044673819  
ACGCCAGA 0.0398922028678  
ACGCCAGC -0.240293486552  
ACGCCAGG -0.380328588277  
ACGCCAGT -0.293363290702  
ACGCCATA -0.0244736437682  
ACGCCATC 0.0189923437886  
ACGCCATG -0.0854941472811  
ACGCCCAA -0.15843580753  
ACGCCCAC -0.0598584012513  
ACGCCCAG -0.180301727643  
ACGCCCAT -0.23756840283  
ACGCCCCA -0.0905426024721  
ACGCCCCC -0.375212578037  
ACGCCCCG -0.262407553712  
ACGCCCCCT -0.196862945221  
ACGCCCGA -0.0159949290395  
ACGCCCGC -0.330192509203  
ACGCCCGG -0.39291290235  
ACGCCCGT -0.142501314387  
ACGCCCTA -0.100285816584  
ACGCCCTC -0.110576615832  
ACGCCCTG -0.201308641975  
ACGCCGAA -0.0301392456475  
ACGCCGAC -0.279399420856  
ACGCCGAG -0.17229961311  
ACGCCGAT 0.0908125463077  
ACGCCGCA -0.272912127814  
ACGCCGCC -0.212334378168  
ACGCCGCG -0.248852464731  
ACGCCGCT -0.190879778272  
ACGCCGGA -0.192412693709  
ACGCCGGC -0.125395806237  
ACGCCGGG -0.247626584576  
ACGCCGTA -0.0391211477677  
ACGCCGTC -0.0999719256654  
ACGCCGTG -0.139395031027  
ACGCCTAA -0.0778540541727  
ACGCCTAC -0.293140304559  
ACGCCTAG -0.113638234471  
ACGCCTAT -0.10730552263  
ACGCCTCA -0.121346953361  
ACGCCTCC -0.177361246855  
ACGCCTCG -0.182491865168

ACGCCTCT -0.292056950169  
ACGCCTGA -0.0408353088371  
ACGCCTGC -0.189398054417  
ACGCCTGG -0.0847366948162  
ACGCCTTA -0.0752531489257  
ACGCCTTC -0.139417087854  
ACGCCTTG -0.131749637824  
ACGCGAAA 0.0153261936998  
ACGCGAAC 0.00108216933553  
ACGCGAAG -0.0121496956402  
ACGCGAAT 0.222548793607  
ACGCGACA 0.0639531054469  
ACGCGACC -0.0842710940932  
ACGCGACG -0.0396267661298  
ACGCGACT -0.136213583148  
ACGCGAGA -0.0623262098122  
ACGCGAGC -0.0858120378307  
ACGCGAGG -0.0742505802756  
ACGCGAGT -0.25621247462  
ACGCGATA 0.249517003666  
ACGCGATC 0.428563334447  
ACGCGATG -0.00312301038442  
ACGCGCAA 0.187007685267  
ACGCGCAC 0.0210262519431  
ACGCGCAG -0.149359359281  
ACGCGCAT 0.0490707809173  
ACGCGCCA -0.0648957595913  
ACGCGCCC -0.197135802469  
ACGCGCCG -0.152671301125  
ACGCGCCT -0.251708871607  
ACGCGCGA -0.00376907690028  
ACGCGCGC -0.0526548332565  
ACGCGCGG -0.00794946661224  
ACGCGCGT 0.00659675616468  
ACGCGCTA -0.0535774991646  
ACGCGCTC -0.0880473302012  
ACGCGCTG -0.118502668514  
ACGCGGAA 0.00336093414764  
ACGCGGAC -0.344182851633  
ACGCGGAG -0.138948038102  
ACGCGGAT 0.250930512981  
ACGCGGCA -0.063213033386  
ACGCGGCC -0.0379732493551  
ACGCGGCG -0.281907342485  
ACGCGGCT -0.175231601851  
ACGCGGGA 0.00841085590406  
ACGCGGGC -0.235398672158  
ACGCGGGG -0.184221231096  
ACGCGGTA -0.213074074074  
ACGCGGTC -0.179497910125  
ACGCGGTG -0.180797703912  
ACGCGTAA 0.0732013875167  
ACGCGTAC -0.13758343904  
ACGCGTAG -0.0113010164877

ACGCGTAT 0.180434806472  
ACGCGTCA 0.00167127708621  
ACGCGTCC -0.137812018152  
ACGCGTCG -0.0505286038929  
ACGCGTCT -0.188255051107  
ACGCGTGA 0.125411644603  
ACGCGTGC -0.0421894036682  
ACGCGTGG -0.0732357567171  
ACGCGTTA 0.017621133285  
ACGCGTTC -0.195915444263  
ACGCGTTG -0.0957294689005  
ACGCTAAA 0.0433847137274  
ACGCTAAC -0.113575368404  
ACGCTAAG -0.179016774415  
ACGCTAAT -0.0965656008019  
ACGCTACA 0.0366555797054  
ACGCTACC -0.0774207139018  
ACGCTACG -0.102003492166  
ACGCTACT 0.102895413537  
ACGCTAGA 0.026963544754  
ACGCTAGC -0.111223616188  
ACGCTAGG -0.158408362604  
ACGCTAGT -0.22658430811  
ACGCTATA -0.00183849759074  
ACGCTATC 0.210200049395  
ACGCTATG -0.089987268347  
ACGCTCAA -0.0604923026262  
ACGCTCAC -0.00178684533183  
ACGCTCAG -0.164582703884  
ACGCTCAT -0.153560395301  
ACGCTCCA -0.112666897153  
ACGCTCCC -0.203451303155  
ACGCTCCG -0.16812345679  
ACGCTCCT -0.149913267322  
ACGCTCGA -0.0678081574903  
ACGCTCGC -0.216473877833  
ACGCTCGG -0.15949103801  
ACGCTCTA -0.0668995975767  
ACGCTCTC -0.274627923459  
ACGCTCTG -0.125232740867  
ACGCTGAA 0.00210226711449  
ACGCTGAC -0.280258533043  
ACGCTGAG -0.0986991369218  
ACGCTGAT 0.159018203478  
ACGCTGCA -0.020238838929  
ACGCTGCC -0.284107510579  
ACGCTGCG -0.0270151519879  
ACGCTGCT 0.0716182644952  
ACGCTGGA -0.146210868062  
ACGCTGGC 0.110831192781  
ACGCTGGG -0.264874339604  
ACGCTGTA -0.080513017179  
ACGCTGTC -0.116265726993  
ACGCTGTG -0.32826926875

ACGCTTAA -0.180979507612  
ACGCTTAC -0.155436869795  
ACGCTTAG -0.0503965313795  
ACGCTTAT 0.154656923278  
ACGCTTCA -0.132779998606  
ACGCTTCC -0.210374284021  
ACGCTTCG -0.0237353769104  
ACGCTTCT -0.119846476573  
ACGCTTGA -0.00772862215798  
ACGCTTGC 0.0282873040547  
ACGCTTGG -0.10763880819  
ACGCTTTA 0.0782284659974  
ACGCTTTC -0.0457445325028  
ACGCTTTG -0.0640025027992  
ACGGAAAA 0.108596167536  
ACGGAAAC -0.279144899285  
ACGGAAAG -0.169432371922  
ACGGAAAT 0.298370985093  
ACGGAAACA -0.0579321170607  
ACGGAAACC -0.0880856639801  
ACGGAACG -0.141783587509  
ACGGAACT -0.0833465499445  
ACGGAAGA 0.021095985937  
ACGGAAGC -0.165786354468  
ACGGAAGG -0.18614266118  
ACGGAAGT -0.0684429737917  
ACGGAATA 0.251870238644  
ACGGAATC 0.460466636642  
ACGGAATG 0.102285450833  
ACGGACAA -0.0073380500632  
ACGGACAC -0.0760023007672  
ACGGACAG -0.200372764776  
ACGGACAT -0.245895747599  
ACGGACCA -0.250780825638  
ACGGACCC -0.0861930727153  
ACGGACCG -0.196414071587  
ACGGACCT -0.320334848331  
ACGGACGA -0.0365653102436  
ACGGACGC -0.254807077878  
ACGGACGG -0.180124548338  
ACGGACGT -0.154603132181  
ACGGACTA -0.127959407203  
ACGGACTC -0.236198212434  
ACGGACTG -0.210869514703  
ACGGAGAA 0.164936901116  
ACGGAGAC -0.223500685871  
ACGGAGAG -0.121692207244  
ACGGAGAT 0.335189667095  
ACGGAGCA -0.128640156181  
ACGGAGCC 0.035461188674  
ACGGAGCG -0.0554393609296  
ACGGAGCT -0.216456586091  
ACGGAGGA -0.149790123457  
ACGGAGGC -0.136325874975

ACGGAGGG -0.266477924273  
ACGGAGTA -0.105722452709  
ACGGAGTC -0.314324801617  
ACGGAGTG -0.275793944782  
ACGGATAA 0.0232743858263  
ACGGATAC 0.261602719626  
ACGGATAG 0.0667252625921  
ACGGATAT 0.359583374494  
ACGGATCA 0.136026324583  
ACGGATCC 0.209641019508  
ACGGATCG 0.159026542844  
ACGGATCT 0.302327372045  
ACGGATGA -0.135171422407  
ACGGATGC -0.00765766420176  
ACGGATGG -0.226257973069  
ACGGATTA 0.315971990179  
ACGGATTC 0.398591079719  
ACGGATTG 0.342996818387  
ACGGCAAA -0.0288974765011  
ACGGCAAC -0.0668535192152  
ACGGCAAG -0.0186287609768  
ACGGCAAT 0.141336802125  
ACGGCACA 0.0530254383798  
ACGGCACC -0.187625177649  
ACGGCACG -0.095386720191  
ACGGCACT -0.156014524328  
ACGGCAGA -0.0106900368682  
ACGGCAGC -0.281815066305  
ACGGCAGG -0.243468892296  
ACGGCAGT -0.22175313275  
ACGGCATA -0.116210883906  
ACGGCATC 0.0648709031694  
ACGGCATG -0.345934226157  
ACGGCCAA -0.0257045635411  
ACGGCCAC -0.300054019831  
ACGGCCAG -0.152125659865  
ACGGCCAT -0.212720597919  
ACGGCCCA -0.240393267057  
ACGGCCCC -0.105140376973  
ACGGCCCG -0.271724103881  
ACGGCCCT -0.0498001255026  
ACGGCCGA -0.0475931074756  
ACGGCCGC -0.228121726609  
ACGGCCGG -0.0811328416524  
ACGGCCGT 0.0488840608335  
ACGGCCTA -0.0124518762803  
ACGGCCTC -0.235914275838  
ACGGCCTG -0.0815208232854  
ACGGCGAA 0.0230840298781  
ACGGCGAC -0.235702271427  
ACGGCGAG -0.0468647401665  
ACGGCGAT 0.0711795214505  
ACGGCGCA -0.111948039119  
ACGGCGCC -0.219648961094

ACGGCGCG -0.0963145234388  
ACGGCGCT -0.188964064069  
ACGGCGGA -0.0399487531085  
ACGGCGGC -0.235125668713  
ACGGCGGG -0.0727101582911  
ACGGCGTA 0.0834556099545  
ACGGCGTC -0.190480109739  
ACGGCGTG 0.0168774287032  
ACGGCTAA -0.103289051311  
ACGGCTAC -0.172939898393  
ACGGCTAG -0.0536758047254  
ACGGCTAT 0.063972513089  
ACGGCTCA -0.284067965852  
ACGGCTCC -0.0848945336444  
ACGGCTCG -0.217273512713  
ACGGCTCT -0.139094402013  
ACGGCTGA -0.137517831255  
ACGGCTGC -0.188751993169  
ACGGCTGG -0.00994267590438  
ACGGCTTA -0.0487194087433  
ACGGCTTC -0.330442849496  
ACGGCTTG -0.0927626886145  
ACGGGAAA 0.21731291677  
ACGGGAAC -0.176519491637  
ACGGGAAG -0.146340192044  
ACGGGAAT 0.329686342307  
ACGGGACA -0.0030303734652  
ACGGGACC -0.324075445613  
ACGGGACG -0.28247116337  
ACGGGACT -0.21895069815  
ACGGGAGA -0.103876635601  
ACGGGAGC -0.27128884223  
ACGGGAGG -0.125350566669  
ACGGGAGT -0.269013372681  
ACGGGATA 0.105497363183  
ACGGGATC 0.204670724798  
ACGGGATG 0.0369924309561  
ACGGGCAA -0.0257335069783  
ACGGGCAC -0.201528174353  
ACGGGCAG -0.0632768640622  
ACGGGCAT -0.132379812511  
ACGGGCCA -0.235988277699  
ACGGGCCC -0.232704762103  
ACGGGCCG -0.333180373957  
ACGGGCCT -0.242752430487  
ACGGGCGA 0.00409998024106  
ACGGGCGC -0.1311282984  
ACGGGCGG 0.0218545953361  
ACGGGCTA -0.0530719277091  
ACGGGCTC -0.259206700113  
ACGGGCTG -0.215262002743  
ACGGGGAA 0.139569474632  
ACGGGGAC -0.21871434549  
ACGGGGAG -0.163064633261



ACGGGGAT 0.295440659149  
ACGGGGCA -0.0366071169208  
ACGGGGCC -0.155453949968  
ACGGGGCG -0.217056819271  
ACGGGGCT -0.0392048822048  
ACGGGGGA -0.134406743386  
ACGGGGGC -0.242779217158  
ACGGGGGG -0.0603051572269  
ACGGGGTA -0.113442887774  
ACGGGGTC -0.119873799726  
ACGGGGTG -0.212610847711  
ACGGGTAA -0.157752205979  
ACGGGTAC -0.311188595409  
ACGGGTAG -0.0522699867796  
ACGGGTAT 0.065933115985  
ACGGGTCA -0.314404287768  
ACGGGTCC -0.419061018957  
ACGGGTCCG -0.286561012238  
ACGGGTCT -0.388413300849  
ACGGGTGA -0.093361872616  
ACGGGTGC -0.222145089519  
ACGGGTGG -0.0202368397352  
ACGGGTTA -0.193224785016  
ACGGGTTC -0.187988388428  
ACGGGTTG -0.137728280434  
ACGGTAAA 0.100905734466  
ACGGTAAC -0.0622049880349  
ACGGTAAG -0.166996885676  
ACGGTAAT 0.222820479045  
ACGGTACA -0.0736884767242  
ACGGTACC 0.0117442205098  
ACGGTACG 0.0718264945443  
ACGGTACT -0.133728395062  
ACGGTAGA 0.00457584130111  
ACGGTAGC -0.163714823411  
ACGGTAGG -0.157584191322  
ACGGTAGT 0.0202529144438  
ACGGTATA 0.0196273337943  
ACGGTATC 0.313746313541  
ACGGTATG -0.148708787219  
ACGGTCAA -0.00738380994715  
ACGGTCAC -0.180171387073  
ACGGTCAG -0.121567045835  
ACGGTCAT -0.0272704557473  
ACGGTCCA -0.175977599982  
ACGGTCCC -0.12739869281  
ACGGTCCG -0.35470979608  
ACGGTCCT -0.2245944407  
ACGGTCGA -0.0515617418993  
ACGGTCGC -0.21799382716  
ACGGTCGG -0.226571289025  
ACGGTCTA -0.196740740741  
ACGGTCTC -0.249814805669  
ACGGTCTG -0.170842592593

ACGGTGAA 0.0816889756001  
ACGGTGAC -0.15751763124  
ACGGTGAG -0.078157279212  
ACGGTGAT 0.199644066073  
ACGGTGCA -0.0813095140089  
ACGGTGCC -0.304657322591  
ACGGTGCG -0.273262771433  
ACGGTGCT -0.248328249818  
ACGGTGGA 0.160877776648  
ACGGTGGC -0.230813966248  
ACGGTGGG -0.109437337767  
ACGGTGTA -0.114192832408  
ACGGTGTC -0.253522633745  
ACGGTGTG -0.0240745988867  
ACGGTTAA -0.00831247667347  
ACGGTTAC -0.108769926699  
ACGGTTAG -0.211328707079  
ACGGTTAT 0.0373527232577  
ACGGTTCA -0.0751487115326  
ACGGTTCC -0.299079241225  
ACGGTTCG -0.0505847485944  
ACGGTTCT -0.0353798323479  
ACGGTTGA -0.0137564830822  
ACGGTTGC -0.0742318364738  
ACGGTTGG 0.00513347656443  
ACGGTTTA -0.0926365013502  
ACGGTTTC -0.22640034237  
ACGGTTTG -3.63944534853E-5  
ACGTAAAA 0.0594365771598  
ACGTAAAC 0.00577629915883  
ACGTAAAG 0.0958359240169  
ACGTAAAT 0.161421120683  
ACGTAAACA 0.0690991239667  
ACGTAAACC 0.0090863685262  
ACGTAAACG 0.0398279327227  
ACGTAAACT -0.0275023461424  
ACGTAAAGA 0.140474772275  
ACGTAAAGC 0.00342213879558  
ACGTAAAGG -0.17173228438  
ACGTAAAGT -0.0350049529792  
ACGTAAATA 0.293369459416  
ACGTAAATC 0.474883927689  
ACGTAAATG 0.0458370258452  
ACGTACAA 0.0617567155289  
ACGTACAC -0.00154770725282  
ACGTACAG -0.085681665001  
ACGTACAT 0.0227421044832  
ACGTACCA -0.149684822077  
ACGTACCC -0.145777714513  
ACGTACCG -0.193744855967  
ACGTACCT -0.00712523859744  
ACGTACGA -0.0842114217349  
ACGTACGC -0.21684822077  
ACGTACGG -0.155262002743

ACGTACGT -0.11310141063  
ACGTACTA -0.0535896749234  
ACGTACTC -0.101711005751  
ACGTACTG -0.146646618027  
ACGTAGAA 0.230789918549  
ACGTAGAC -0.193800316096  
ACGTAGAG 0.109993949422  
ACGTAGAT 0.287596873696  
ACGTAGCA -0.0938832633572  
ACGTAGCC -0.166309978489  
ACGTAGCG -0.0521311799279  
ACGTAGCT -0.0883658774847  
ACGTAGGA -0.00511527900862  
ACGTAGGC -0.208449437501  
ACGTAGGG -0.154504715817  
ACGTAGTA 0.0355795991634  
ACGTAGTC -0.257115577724  
ACGTAGTG 0.034358519896  
ACGTATAA 0.221409910207  
ACGTATAC -0.0171299040594  
ACGTATAG -0.00763076011261  
ACGTATAT 0.154456251284  
ACGTATCA 0.166212427179  
ACGTATCC 0.28984288266  
ACGTATCG 0.222581725175  
ACGTATCT 0.303036334316  
ACGTATGA 0.0133206456206  
ACGTATGC -0.0812009089562  
ACGTATGG -0.248007890005  
ACGTATTA 0.0516318831461  
ACGTATTC 0.0540598259556  
ACGTATTG 0.176883705423  
ACGTCAAA -0.0629548355897  
ACGTCAAC -0.0314012644473  
ACGTCAAG -0.00317984654226  
ACGTCAAT 0.0414334013919  
ACGTCACA -0.02437369357  
ACGTCACC -0.187056951907  
ACGTCACG -0.191965584034  
ACGTCACT -0.107252335362  
ACGTCAGA -0.0589557203827  
ACGTCAGC -0.208364889635  
ACGTCAGG -0.107398810308  
ACGTCAGT -0.206294521826  
ACGTCATA 0.0110018880766  
ACGTCATC -0.0171381369514  
ACGTCATG -0.0824828296168  
ACGTCCAA -0.12970925233  
ACGTCCAC -0.169216422246  
ACGTCCAG -0.0582077291421  
ACGTCCAT -0.0472677775582  
ACGTCCCA -0.295420402859  
ACGTCCCC -0.151500801822  
ACGTCCCG -0.288021947874

ACGTCCCT -0.156100286462  
ACGTCCGA -0.185968868478  
ACGTCCGC -0.153127087872  
ACGTCCGG -0.0229258600628  
ACGTCCTA 0.104195481789  
ACGTCCTC -0.302336964415  
ACGTCCTG -0.162723695692  
ACGTCGAA 0.0376055089855  
ACGTCGAC -0.0960261793035  
ACGTCGAG -0.105176075468  
ACGTCGAT 0.174409077042  
ACGTCGCA -0.0516303716271  
ACGTCGCC -0.0839175976639  
ACGTCGCG -0.0604139907124  
ACGTCGCT -0.0535250764174  
ACGTCGGA 0.21908822803  
ACGTCGGC -0.175807667316  
ACGTCGGG 0.0121587803352  
ACGTCGTA 0.00641982017587  
ACGTCGTC -0.0422596184577  
ACGTCGTG 0.0511600540438  
ACGTCTAA 0.0347464152369  
ACGTCTAC -0.203685412002  
ACGTCTAG -0.0351215174867  
ACGTCTAT -0.00608864933971  
ACGTCTCA -0.19922941525  
ACGTCTCC -0.3137148406  
ACGTCTCG -0.118052540588  
ACGTCTCT -0.244734877208  
ACGTCTGA -0.149258024031  
ACGTCTGC -0.109094251814  
ACGTCTGG -0.112451450035  
ACGTCTTA -0.0413922369317  
ACGTCTTC -0.13646954238  
ACGTCTTG -0.148498932915  
ACGTGAAA 0.16463314233  
ACGTGAAC -0.0260022173923  
ACGTGAAG -0.0993661896145  
ACGTGAAT 0.106470852822  
ACGTGACA -0.0927731424454  
ACGTGACC -0.2613281908  
ACGTGACG -0.267209026715  
ACGTGACT -0.280377100719  
ACGTGAGA -0.103934738652  
ACGTGAGC -0.0754037583586  
ACGTGAGG -0.0649593335309  
ACGTGAGT -0.0360416503244  
ACGTGATA 0.1604739006  
ACGTGATC 0.221621769189  
ACGTGATG -0.107179794083  
ACGTGCAA 0.133356093734  
ACGTGCAC 0.0687281828361  
ACGTGCAG -0.0927098920576  
ACGTGCAT -0.121021893568

ACGTGCCA -0.0255548969242  
ACGTGCCC -0.181105072516  
ACGTGCCG -0.137496296296  
ACGTGCCT -0.30329537101  
ACGTGCGA -0.0148411600694  
ACGTGCGC -0.0693770686163  
ACGTGCGG -0.0973964678894  
ACGTGCTA -0.214411615604  
ACGTGCTC -0.222026886205  
ACGTGCTG -0.129201519243  
ACGTGGAA -0.063428944653  
ACGTGGAC -0.152408381489  
ACGTGGAG -0.124069433758  
ACGTGGAT 0.252980306922  
ACGTGGCA -0.151057443259  
ACGTGGCC -0.345041798315  
ACGTGGCG -0.0680629108772  
ACGTGGCT -0.141336318539  
ACGTGGGA 0.0724711054035  
ACGTGGGC -0.0872090789856  
ACGTGGGG -0.232948654653  
ACGTGGTA -0.0321724955542  
ACGTGGTC -0.167735657226  
ACGTGGTG -0.214055434053  
ACGTGTAA 0.21439548618  
ACGTGTAC -0.214243382062  
ACGTGTAG -0.13903017135  
ACGTGTAT -0.0521003422608  
ACGTGTCA -0.116680659127  
ACGTGTCC -0.147981668999  
ACGTGTCT -0.0291298606092  
ACGTGTCT 0.0347929045661  
ACGTGTGA 0.00547266572719  
ACGTGTGC -0.00846890162243  
ACGTGTGG -0.220768175583  
ACGTGTTA -0.162835267967  
ACGTGTTC -0.255206618825  
ACGTGTTG 0.0373294785931  
ACGTTAAA 0.0987012043642  
ACGTTAAC -0.139019013502  
ACGTTAAG 0.042661223541  
ACGTTAAT -0.0624025774441  
ACGTTACA 0.0643250298349  
ACGTTACC 0.0140063632269  
ACGTTACG 0.0898153636743  
ACGTTACT -0.194977021772  
ACGTTAGA 0.0174756742073  
ACGTTAGC -0.22881100573  
ACGTTAGG 0.0102445799025  
ACGTTAGT -0.0334831719686  
ACGTTATA 0.107679577117  
ACGTTATC 0.162319100069  
ACGTTATG 0.0301817822565  
ACGTTCAA 0.00811409115207

ACGTTCAC -0.10301235974  
ACGTTCAG -0.195264827253  
ACGTTCAT -0.133833769569  
ACGTTCCA 0.0273371783883  
ACGTTCCC -0.389171208791  
ACGTTCCG 0.0721272601522  
ACGTTCCCT -0.0703820968928  
ACGTTCGA 0.0496492441458  
ACGTTCGC -0.178714707771  
ACGTTCGG 0.00693758370107  
ACGTTCTA 0.026164990107  
ACGTTCTC -0.311166303558  
ACGTTCTG -0.198062068425  
ACGTTGAA -0.0652869989685  
ACGTTGAC -0.302237797988  
ACGTTGAG -0.131616924841  
ACGTTGAT 0.0162311466772  
ACGTTGCA 0.0637993404326  
ACGTTGCC -0.143290741054  
ACGTTGCG -0.2103190281  
ACGTTGCT -0.0943612318483  
ACGTTGGA -0.0899461754975  
ACGTTGGC -0.135124281641  
ACGTTGGG -0.0956210829025  
ACGTTGTA -0.022967499753  
ACGTTGTC -0.20687300997  
ACGTTGTG -0.0346769413159  
ACGTTTAA -0.110634708901  
ACGTTTAC -0.0150799761742  
ACGTTTAG -0.176348159338  
ACGTTTAT -0.0165866303362  
ACGTTTCA -0.0787419692837  
ACGTTTCC 0.0408917234466  
ACGTTTCG 0.00214889097466  
ACGTTTCT -0.0349980241059  
ACGTTTGA -0.0394292255352  
ACGTTTGC -0.133777887544  
ACGTTTGG -0.0169378032449  
ACGTTTTA 0.13667149663  
ACGTTTTC 0.0737200597159  
ACGTTTTG -0.0664880789815  
ACTAAAAA 0.044785204771  
ACTAAAAC 0.0143317885317  
ACTAAAAG 0.0647434630837  
ACTAAAAT 0.303480888527  
ACTAAACA -0.0768101385321  
ACTAAACC -0.0980852184794  
ACTAAACG 0.0184751500007  
ACTAAACT -0.0462932023884  
ACTAAAGA 0.166456496157  
ACTAAAGC -0.248890231715  
ACTAAAGG -0.24395095716  
ACTAAAGT -0.153967940381  
ACTAAATA 0.0981872876134

ACTAAATC 0.215095956881  
ACTAAATG 0.0785306466375  
ACTAACAA -0.0769540295004  
ACTAACAC -0.330808286182  
ACTAACAG -0.00692255168306  
ACTAACAT 0.0755907825187  
ACTAACCA -0.240704697109  
ACTAACCC -0.273187701999  
ACTAACCG -0.093129608253  
ACTAACCT 0.0263549298867  
ACTAACGA 0.0661540319217  
ACTAACGC -0.064142461964  
ACTAACGG 0.152503348043  
ACTAACTA 0.0328380413848  
ACTAACTC 0.00262629256405  
ACTAACTG -0.118561878417  
ACTAAGAA 0.119548797895  
ACTAAGAC -0.0907743974714  
ACTAAGAG -0.200571734027  
ACTAAGAT 0.251160837779  
ACTAAGCA 0.0744207874327  
ACTAAGCC -0.0910121115337  
ACTAAGCG -0.119231897827  
ACTAAGCT -0.110891460145  
ACTAAGGA 0.0910420873709  
ACTAAGGC -0.151476616129  
ACTAAGGG -0.26011335517  
ACTAAGTA 0.0152555489692  
ACTAAGTC -0.0890881248765  
ACTAAGTG -0.158284494491  
ACTAATAA 0.110340970174  
ACTAATAC 0.0132066445321  
ACTAATAG -0.0383707655492  
ACTAATAT 0.208578923969  
ACTAATCA -0.0231069836879  
ACTAATCC -0.0160541394981  
ACTAATCG -0.063439048131  
ACTAATCT -0.0282524370578  
ACTAATGA -0.0667583080908  
ACTAATGC -0.0744116226481  
ACTAATGG 0.0252771199861  
ACTAATTA 0.0465707260313  
ACTAATTC 0.164814841718  
ACTAATTG 0.00814446579324  
ACTACAAA 0.0148460767364  
ACTACAAC -0.00983104034402  
ACTACAAG -0.0753924328659  
ACTACAAT 0.148685950053  
ACTACACA -0.101715565215  
ACTACACC -0.153687422481  
ACTACACG 0.0465241962431  
ACTACACT -0.078635560385  
ACTACAGA 0.197389091987  
ACTACAGC -0.219305322313

ACTACAGG -0.152259105579  
ACTACAGT -0.151949442905  
ACTACATA -0.0091138114997  
ACTACATC 0.141997297808  
ACTACATG 0.0381196623417  
ACTACCAA -0.0428823903928  
ACTACCAC -0.103402760627  
ACTACCAG -0.275234819058  
ACTACCAT 0.0426515208636  
ACTACCCA -0.243360112384  
ACTACCCC -0.066574172272  
ACTACCCG -0.200031274176  
ACTACCCT -0.0528356780902  
ACTACCGA -0.0442563886508  
ACTACCGC -0.134514994205  
ACTACCGG -0.171306815064  
ACTACCTA -0.0841933689306  
ACTACCTC -0.171583003151  
ACTACCTG -0.145426994865  
ACTACGAA -0.0571862333474  
ACTACGAC -0.215808278867  
ACTACGAG -0.0336588069991  
ACTACGAT 0.240121743931  
ACTACGCA -0.0908732903028  
ACTACGCC -0.321232343648  
ACTACGCG 0.0305381717397  
ACTACGCT -0.200748694796  
ACTACGGA 0.13768541252  
ACTACGGC -0.149004987408  
ACTACGGG -0.114920686087  
ACTACGTA -0.00282113767591  
ACTACGTC -0.0494610732435  
ACTACGTG -0.0191357325268  
ACTACTAA 0.138993172188  
ACTACTAC -0.0111937588075  
ACTACTAG -0.209791495199  
ACTACTAT 0.237587688964  
ACTACTCA 0.0538598310861  
ACTACTCC -0.0303448143392  
ACTACTCG 0.075695953808  
ACTACTCT -0.0195037264103  
ACTACTGA 0.0975186320515  
ACTACTGC -0.173009288979  
ACTACTGG 0.1373454593  
ACTACTTA 0.117881292674  
ACTACTTC 0.00537157743937  
ACTACTTG -0.219575495606  
ACTAGAAA 0.00571092353958  
ACTAGAAC -0.0273109503112  
ACTAGAAG 0.0828135521831  
ACTAGAAT 0.113438321735  
ACTAGACA -0.0982964871548  
ACTAGACC -0.14283473168  
ACTAGACG -0.0974513484145



ACTAGACT -0.14126623537  
ACTAGAGA -0.0427272328142  
ACTAGAGC -0.188151952634  
ACTAGAGG -0.215401583617  
ACTAGAGT -0.0247583960147  
ACTAGATA 0.355368791132  
ACTAGATC 0.279867214853  
ACTAGATG -0.0126000610172  
ACTAGCAA -0.124154112126  
ACTAGCAC -0.113393495302  
ACTAGCAG -0.10800969111  
ACTAGCAT 0.00885035895409  
ACTAGCCA -0.182785249231  
ACTAGCCC -0.209836002612  
ACTAGCCG -0.0404379078511  
ACTAGCCT -0.322714536118  
ACTAGCGA -0.191243289098  
ACTAGCGC -0.235201171126  
ACTAGCGG -0.12715754549  
ACTAGCTA -0.118200064477  
ACTAGCTC -0.0728254187798  
ACTAGCTG -0.236772694263  
ACTAGGAA 0.139868603043  
ACTAGGAC -0.096603373382  
ACTAGGAG -0.135559177491  
ACTAGGAT 0.172218267401  
ACTAGGCA -0.0469954849469  
ACTAGGCC -0.244852106069  
ACTAGGCG -0.0177678699094  
ACTAGGCT -0.0823496970894  
ACTAGGGA -0.0474476439791  
ACTAGGGC -0.176972211247  
ACTAGGGG -0.140476464906  
ACTAGGTA -0.180754447282  
ACTAGGTC -0.231934806415  
ACTAGGTG -0.0152829919427  
ACTAGTAA 0.0405552262399  
ACTAGTAC -0.0713192077839  
ACTAGTAG -0.25714951989  
ACTAGTAT 0.185226349645  
ACTAGTCA -0.138697365821  
ACTAGTCC -0.235575308642  
ACTAGTCG -0.134207063239  
ACTAGTCT -0.0287739577159  
ACTAGTGA -0.0193325637746  
ACTAGTGC -0.068179809397  
ACTAGTGG -0.168639170165  
ACTAGTTA -0.218658774659  
ACTAGTTC -0.206995132819  
ACTAGTTG -0.135868081821  
ACTATAAA 0.160140727568  
ACTATAAC -0.0962150650947  
ACTATAAG -0.0274301570468  
ACTATAAT 0.187914227188

ACTATACA 0.0943913035565  
ACTATACC -0.129614996268  
ACTATACG -0.211495198903  
ACTATACT -0.0754768973208  
ACTATAGA -0.0511586851335  
ACTATAGC -0.173123703448  
ACTATAGG -0.134572229629  
ACTATAGT 0.0531354231665  
ACTATATA 0.186538123779  
ACTATATC 0.129648569727  
ACTATATG -0.121940057821  
ACTATCAA 0.0269972251682  
ACTATCAC 0.110499132802  
ACTATCAG -0.0842333739449  
ACTATCAT 0.0759868493271  
ACTATCCA 0.153119856897  
ACTATCCC -0.0936848229379  
ACTATCCG 0.0741490273561  
ACTATCCT -0.13112134929  
ACTATCGA 0.0545886420757  
ACTATCGC -0.00985477178423  
ACTATCGG 0.0543864848844  
ACTATCTA 0.0951941655892  
ACTATCTC 0.201189927331  
ACTATCTG 0.0935612278994  
ACTATGAA 0.17911194773  
ACTATGAC -0.126006008449  
ACTATGAG -0.168908808275  
ACTATGAT 0.0862159138785  
ACTATGCA 0.12429939128  
ACTATGCC 0.0270230960065  
ACTATGCG 0.0340567301148  
ACTATGCT -0.267849108368  
ACTATGGA 0.0510494855922  
ACTATGGC -0.242533757873  
ACTATGGG -0.119473217788  
ACTATGTA 0.0621696388875  
ACTATGTC 0.0443842343062  
ACTATGTG 0.0373440065085  
ACTATTAA -0.0393372364999  
ACTATTAC 0.109971961123  
ACTATTAG -0.0381429888691  
ACTATTAT 0.0218857713671  
ACTATTCA -0.088412525931  
ACTATTCC 0.00241724834277  
ACTATTCCG 0.165500559325  
ACTATTCT 0.0453425095615  
ACTATTGA -0.00851481120974  
ACTATTGC 0.101978702076  
ACTATTGG -0.232799382716  
ACTATTTA -0.129621236552  
ACTATTTTC -0.0285633763532  
ACTATTTG 0.0859376715186  
ACTCAAAA 0.231439861694

ACTCAAAC -0.182253008863  
ACTCAAAG 0.164158179943  
ACTCAAAT 0.122700278821  
ACTCAACA -0.0531814766378  
ACTCAACC 0.00668138828759  
ACTCAACG -0.14784543544  
ACTCAACT -0.112814576174  
ACTCAAGA 0.195429647193  
ACTCAAGC -0.0836077088546  
ACTCAAGG 0.104622518028  
ACTCAAGT 0.0934086847878  
ACTCAATA 0.109518040024  
ACTCAATC 0.125513925007  
ACTCAATG 0.205418889548  
ACTCACAA -0.0954785549506  
ACTCACAC -0.106421338602  
ACTCACAG -0.122279553398  
ACTCACAT -0.00127494319866  
ACTCACCA -0.0566051167318  
ACTCACCC -0.185478945029  
ACTCACCG -0.0955218639055  
ACTCACCT -0.0136144591539  
ACTCACGA -0.10397909349  
ACTCACGC -0.0427935583776  
ACTCACGG -0.221177806563  
ACTCACTA -0.0422444574214  
ACTCACTC -0.112191914452  
ACTCACTG -0.197632127077  
ACTCAGAA 0.174265568085  
ACTCAGAC -0.0862377416682  
ACTCAGAG -0.151426922537  
ACTCAGAT 0.263200794557  
ACTCAGCA -0.0173988451997  
ACTCAGCC -0.15300550946  
ACTCAGCG -0.10033995322  
ACTCAGCT 0.0861187951437  
ACTCAGGA 0.0517080506707  
ACTCAGGC -0.100602528645  
ACTCAGGG -0.119681551735  
ACTCAGTA 0.139950484046  
ACTCAGTC -0.30210233412  
ACTCAGTG -0.0162481819928  
ACTCATAA -0.00965718237502  
ACTCATAC 0.0579376056554  
ACTCATAG 0.0275290398684  
ACTCATAT 0.144420293435  
ACTCATCA 0.0563598982515  
ACTCATCC -0.0380878357764  
ACTCATCG -0.127479062147  
ACTCATCT -0.113924657315  
ACTCATGA -0.0656549375414  
ACTCATGC -0.0587249058799  
ACTCATGG -0.133107796655  
ACTCATTAA 0.0145119346825

ACTCATTG -0.0519468045402  
ACTCATTG 0.0519468045402  
ACTCCAAA 0.00744954704197  
ACTCCAAC -0.207808564232  
ACTCCAAG -0.124690949131  
ACTCCAAT 0.0201486311445  
ACTCCACA -0.117271145794  
ACTCCACC -0.200731449015  
ACTCCACG -0.0939437421528  
ACTCCACT -0.15430543894  
ACTCCAGA -0.161683268846  
ACTCCAGC -0.13332771615  
ACTCCAGG -0.188097887187  
ACTCCAGT -0.0102906067342  
ACTCCATA 0.00986590734096  
ACTCCATC -0.201045665673  
ACTCCATG -0.15128561178  
ACTCCCAA -0.155610438791  
ACTCCCAC -0.04683891434  
ACTCCCAG -0.171286694102  
ACTCCCAT 0.0976132845946  
ACTCCCCA -0.10011795502  
ACTCCCCC -0.26443470748  
ACTCCCCG -0.125999587529  
ACTCCCCT -0.185634986798  
ACTCCCGA 0.114568593553  
ACTCCCGC 0.086176425388  
ACTCCCGG -0.169247814923  
ACTCCCTA -0.142831617756  
ACTCCCTC -0.205251965965  
ACTCCCTG -0.153679339285  
ACTCCGAA 0.0322359914576  
ACTCCGAC -0.124970580971  
ACTCCGAG -0.202415123457  
ACTCCGAT 0.0458050670706  
ACTCCGCA 0.0255531503785  
ACTCCGCC -0.176617298441  
ACTCCGCG -0.0595310388912  
ACTCCGCT -0.306487951212  
ACTCCGGA 0.00485160480628  
ACTCCGGC -0.0440843926321  
ACTCCGGG -0.121983213199  
ACTCCGTA -0.115559397382  
ACTCCGTC -0.234453719253  
ACTCCGTG -0.251245399646  
ACTCCTAA -0.053160547993  
ACTCCTAC -0.114524174033  
ACTCCTAG -0.242934854171  
ACTCCTAT 0.0280769061889  
ACTCCTCA -0.353325976157  
ACTCCTCC -0.228148440801  
ACTCCTCG -0.0467842459286  
ACTCCTCT -0.0358789435553  
ACTCCTGA -0.0275239553492

ACTCCTGC -0.375314799269  
ACTCCTGG -0.26188277118  
ACTCCTTA -0.0613734659378  
ACTCCTTC -0.252200291315  
ACTCCTTG -0.192856292104  
ACTCGAAA 0.0505197699181  
ACTCGAAC -0.0832153402044  
ACTCGAAG -0.120855148342  
ACTCGAAT 0.0801403396627  
ACTCGACA -0.0761353336277  
ACTCGACC -0.271169050637  
ACTCGACG -0.172007041742  
ACTCGACT -0.0260483552307  
ACTCGAGA 0.238405343696  
ACTCGAGC -0.119726927995  
ACTCGAGG -0.164276812508  
ACTCGAGT -0.180848676356  
ACTCGATA 0.0706942890765  
ACTCGATC 0.0456815736899  
ACTCGATG -0.0506748216698  
ACTCGCAA 0.100652598044  
ACTCGCAC -0.27199200502  
ACTCGCAG -0.0718210059496  
ACTCGCAT -0.141312999274  
ACTCGCCA -0.0978293080456  
ACTCGCCC -0.141574111628  
ACTCGCCG -0.0563280033467  
ACTCGCCT -0.018311176703  
ACTCGCGA 0.209063821932  
ACTCGCGC 0.00995631078619  
ACTCGCGG -0.239432711891  
ACTCGCTA -0.085847258698  
ACTCGCTC -0.138607640089  
ACTCGCTG -0.034638908663  
ACTCGGAA 0.0347246233638  
ACTCGGAC -0.219320261438  
ACTCGGAG -0.114995925524  
ACTCGGAT 0.224684381038  
ACTCGGCA -0.172234295938  
ACTCGGCC -0.24177536516  
ACTCGGCG -0.264264429975  
ACTCGGCT -0.132836601307  
ACTCGGGA 0.00794868128583  
ACTCGGGC -0.357751295391  
ACTCGGGG -0.108326337103  
ACTCGGTA -0.0576933631913  
ACTCGGTC -0.197721376297  
ACTCGGTG -0.0888249530772  
ACTCGTAA 0.202888647391  
ACTCGTAC -0.204479164246  
ACTCGTAG -0.068962561562  
ACTCGTAT -0.0200063922828  
ACTCGTCA -0.138490682255  
ACTCGTCC -0.166421762323

ACTCGTCG -0.231433932451  
ACTCGTCT -0.14336873302  
ACTCGTGA 0.00367992096814  
ACTCGTGC -0.0173705441673  
ACTCGTGG 0.00995305273433  
ACTCGTTA -0.0484201780277  
ACTCGTTC -0.0702642627809  
ACTCGTTG -0.163450980392  
ACTCTAAA 0.161726931436  
ACTCTAAC -0.103804775726  
ACTCTAAG -0.227182441701  
ACTCTAAT 0.187671518584  
ACTCTACA 0.0320958460931  
ACTCTACC -0.165132983247  
ACTCTACG -0.213718906484  
ACTCTACT -0.0719946891188  
ACTCTAGA 0.128968558332  
ACTCTAGC -0.236966855438  
ACTCTAGG -0.254554379524  
ACTCTATA 0.0320229960758  
ACTCTATC -0.0461321039488  
ACTCTATG -0.158666857314  
ACTCTCAA -0.132786174498  
ACTCTCAC -0.0841878168902  
ACTCTCAG -0.0104365628225  
ACTCTCAT 0.0947029572548  
ACTCTCCA -0.000515690051395  
ACTCTCCC -0.153848475371  
ACTCTCCG -0.0839726914507  
ACTCTCCT -0.0357975906259  
ACTCTCGA -0.161239518855  
ACTCTCGC -0.19164565273  
ACTCTCGG -0.048254470966  
ACTCTCTA -0.0995824210798  
ACTCTCTC -0.251687250689  
ACTCTCTG -0.0702378738931  
ACTCTGAA -0.029190940392  
ACTCTGAC -0.0589150462378  
ACTCTGAG -0.11068050294  
ACTCTGAT 0.118797887989  
ACTCTGCA -0.234605596486  
ACTCTGCC -0.17584220077  
ACTCTGCG 0.063328635974  
ACTCTGCT -0.259844097607  
ACTCTGGA 0.0298716766559  
ACTCTGGC -0.168653243553  
ACTCTGGG 0.126693567887  
ACTCTGTA 0.164563370542  
ACTCTGTC -0.102276219325  
ACTCTGTG -0.157049804645  
ACTCTTAA -0.0190737001148  
ACTCTTAC 0.03574270739  
ACTCTTAG -0.102677494806  
ACTCTTAT -0.0925011114953

ACTCTTCA -0.138067376299  
ACTCTTCC -0.272079690635  
ACTCTTCG -0.101416945172  
ACTCTTCT -0.18242267517  
ACTCTTGA -0.18278462553  
ACTCTTGC -0.217548293391  
ACTCTTGG -0.148999369613  
ACTCTTTA -0.0691165574652  
ACTCTTTC 0.0615875211311  
ACTCTTTG 0.0603580759182  
ACTGAAAA 0.056163468104  
ACTGAAAC -0.0255822062092  
ACTGAAAG 0.0725498246567  
ACTGAAAT 0.264807577761  
ACTGAACA -0.0694487218971  
ACTGAACC -0.134568338844  
ACTGAACG -0.0577208606337  
ACTGAACT -0.123552526151  
ACTGAAGA 0.032991942743  
ACTGAAGC -0.181523367409  
ACTGAAGG -0.147410493827  
ACTGAAGT -0.0566408179393  
ACTGAATA 0.199463764298  
ACTGAATC 0.167743669461  
ACTGAATG -0.116300321067  
ACTGACAA 0.0968983951349  
ACTGACAC -0.170339506173  
ACTGACAG 0.0297517011349  
ACTGACAT 0.0136494607722  
ACTGACCA -0.0161227589272  
ACTGACCC -0.214971909496  
ACTGACCG -0.129388131463  
ACTGACCT -0.117764734938  
ACTGACGA -0.0957745374042  
ACTGACGC -0.196836419753  
ACTGACGG -0.0272773854208  
ACTGACTA -0.0616361338312  
ACTGACTC -0.241665625808  
ACTGACTG -0.246398999128  
ACTGAGAA -0.0658169224422  
ACTGAGAC -0.133578794481  
ACTGAGAG -0.103501870918  
ACTGAGAT 0.261166882164  
ACTGAGCA -0.220213125406  
ACTGAGCC -0.323898275056  
ACTGAGCG -0.066295581844  
ACTGAGCT -0.10572980983  
ACTGAGGA -0.000857104671366  
ACTGAGGC -0.202779956427  
ACTGAGGG -0.102402323893  
ACTGAGTA -0.0203764078245  
ACTGAGTC -0.141816475701  
ACTGAGTG -0.11884537508  
ACTGATAA 0.162981075325

ACTGATAC 0.17182045709  
ACTGATAG -0.0996773184505  
ACTGATAT 0.325083898711  
ACTGATCA -0.0598998484206  
ACTGATCC 0.0543649121788  
ACTGATCG 0.122840788575  
ACTGATCT 0.0647516959758  
ACTGATGA -0.087055627388  
ACTGATGC 0.0187293961044  
ACTGATGG -0.0430135075069  
ACTGATTA 0.255320849011  
ACTGATTC 0.337721464796  
ACTGATTG 0.232782241076  
ACTGCAAA 0.150153269356  
ACTGCAAC 0.0836851510177  
ACTGCAAG -0.0447466747244  
ACTGCAAT 0.255801444598  
ACTGCACA 0.0460493095348  
ACTGCACC -0.117046146754  
ACTGCACG -0.0699019704691  
ACTGCACT -0.178454421231  
ACTGCAGA 0.147733759248  
ACTGCAGC -0.123047084974  
ACTGCAGG -0.278477297167  
ACTGCAGT 0.0670202593811  
ACTGCATA 0.0163453576046  
ACTGCATC -0.031189802924  
ACTGCATG 0.00408351445696  
ACTGCCAA -0.0333047926409  
ACTGCCAC -0.101880662704  
ACTGCCAG -0.189698547205  
ACTGCCAT -0.177914430285  
ACTGCCCA -0.199169768554  
ACTGCCCC -0.12841355428  
ACTGCCCG -0.179921093497  
ACTGCCCT -0.132217864924  
ACTGCCGA -0.0457813340358  
ACTGCCGC -0.0239471727055  
ACTGCCGG -0.238104436382  
ACTGCCTA -0.123395394542  
ACTGCCTC -0.281055593957  
ACTGCCTG -0.190451800102  
ACTGCGAA -0.119326319949  
ACTGCGAC -0.106153145441  
ACTGCGAG -0.132689521175  
ACTGCGAT 0.243468572307  
ACTGCGCA -0.138205693841  
ACTGCGCC -0.106248456409  
ACTGCGCG -0.0417854206433  
ACTGCGCT 0.0336974997458  
ACTGCGGA 0.00828228940262  
ACTGCGGC -0.087937809389  
ACTGCGGG -0.16812085693  
ACTGCGTA 0.168086528264



ACTGCGTC -0.0953901701593  
ACTGCGTG -0.103979871115  
ACTGCTAA -0.0697296354946  
ACTGCTAC -0.067240196482  
ACTGCTAG -0.0724893671416  
ACTGCTAT -0.07036825207  
ACTGCTCA -0.140682328539  
ACTGCTCC -0.0874277813441  
ACTGCTCG -0.0284706786312  
ACTGCTCT -0.10932947306  
ACTGCTGA -0.0371660190125  
ACTGCTGC -0.25079471111  
ACTGCTGG -0.111714737258  
ACTGCTTA -0.148642131685  
ACTGCTTC -0.116725988988  
ACTGCTTG -0.0839039255388  
ACTGAAA 0.0987232045836  
ACTGGAAC -0.206964953002  
ACTGGAAG -0.116465906846  
ACTGGAAT 0.244706250412  
ACTGGACA -0.0673707490273  
ACTGGACC -0.102209078021  
ACTGGACG -0.00903813852386  
ACTGGACT -0.179953241793  
ACTGGAGA -0.12249058799  
ACTGGAGC -0.188030916634  
ACTGGAGG -0.176614735075  
ACTGGATA 0.309713166041  
ACTGGATC 0.0820517553826  
ACTGGATG -0.0218550896429  
ACTGGCAA -0.0162122319086  
ACTGGCAC -0.374171954637  
ACTGGCAG -0.297110963293  
ACTGGCAT -0.00759347076774  
ACTGGCCA -0.0607080733754  
ACTGGCCC -0.154833434847  
ACTGGCCG -0.0912743839015  
ACTGGCCT -0.245330589849  
ACTGGCGA -0.033215602977  
ACTGGCGC -0.20875728539  
ACTGGCGG -0.139202455742  
ACTGGCTA -0.252059462663  
ACTGGCTC -0.270531967415  
ACTGGCTG -0.169585878041  
ACTGGGAA 0.0741751776038  
ACTGGGAC -0.229681296308  
ACTGGGAG -0.265215983847  
ACTGGGAT 0.161978992634  
ACTGGGCA -0.162781317397  
ACTGGGCC -0.348243252271  
ACTGGGCG -0.191632489456  
ACTGGGCT -0.158577902874  
ACTGGGGA -0.0140152164377  
ACTGGGGC -0.190783950345

ACTGGGGG -0.179000726216  
ACTGGGTA 0.0404989681442  
ACTGGGTC -0.204993464052  
ACTGGGTG -0.193379193744  
ACTGGTAA 0.249367309285  
ACTGGTAC -0.188764340856  
ACTGGTAG -0.144733430462  
ACTGGTAT -0.0473464762541  
ACTGGTCA -0.238545164955  
ACTGGTCC -0.125377669835  
ACTGGTCG -0.279971594622  
ACTGGTCT -0.0811550876092  
ACTGGTGA -0.0746769470333  
ACTGGTGC -0.183831002904  
ACTGGTGG -0.169953843964  
ACTGGTTA -0.0791499846012  
ACTGGTTC -0.180426148827  
ACTGGTTG -0.281703477362  
ACTGTAAG 0.202232940595  
ACTGTAAC -0.0685887117862  
ACTGTAAG -0.10166066723  
ACTGTAAT 0.355255473392  
ACTGTACA -0.123979464353  
ACTGTACC -0.128969331819  
ACTGTACG -0.250571178304  
ACTGTACT -0.1997557696  
ACTGTAGA 0.10857538036  
ACTGTAGC 0.0455141715515  
ACTGTAGG -0.185574333452  
ACTGTATA 0.0824277152078  
ACTGTATC 0.105416006857  
ACTGTATG 0.020239192957  
ACTGTCAA 0.228369184036  
ACTGTCAC -0.134714220553  
ACTGTCAG -0.139212393931  
ACTGTCAT -0.0690913528308  
ACTGTCCA -0.194545963387  
ACTGTCCC -0.112338880932  
ACTGTCCG -0.142351507968  
ACTGTCCT -0.0388868711229  
ACTGTCGA -0.0891523284213  
ACTGTCGC 0.035782893148  
ACTGTCGG -0.271835684383  
ACTGTCTA -0.216420044135  
ACTGTCTC -0.293706628867  
ACTGTCTG -0.163261363999  
ACTGTGAA 0.0582038024984  
ACTGTGAC -0.158219317357  
ACTGTGAG -0.182876772466  
ACTGTGAT 0.165674894309  
ACTGTGCA -0.208078862605  
ACTGTGCC -0.222304841352  
ACTGTGCG -0.112903694449  
ACTGTGCT -0.240291692204

ACTGTGGA -0.133415553212  
ACTGTGGC 0.00619570526223  
ACTGTGGG -0.161397984704  
ACTGTGTA 0.0441941645261  
ACTGTGTC -0.187624142661  
ACTGTGTG 0.0487280810077  
ACTGTTAA -0.0523234119145  
ACTGTTAC 0.150737291706  
ACTGTTAG -0.0330757049671  
ACTGTTAT 0.188812052359  
ACTGTTCA -0.0785509679968  
ACTGTTCC -0.151044925198  
ACTGTTCCG -0.0790724428847  
ACTGTTCT -0.157506202112  
ACTGTTGA -0.17795221605  
ACTGTTGC -0.233684822077  
ACTGTTGG -0.0719959902954  
ACTGTTTA -0.183011055744  
ACTGTTTC -0.064583278859  
ACTGTTTG -0.0621916552795  
ACTTAAAA 0.179050800158  
ACTTAAAC 0.0106475091889  
ACTTAAAG -0.0149125118005  
ACTTAAAT 0.151774584865  
ACTTAAACA 0.0593701288722  
ACTTAAACC -0.0268149873771  
ACTTAAACG 0.0691276708253  
ACTTAACT -0.0253352316476  
ACTTAAAGA 0.0421056301608  
ACTTAAAGC -0.154977114821  
ACTTAAAGG -0.136725887698  
ACTTAAAGT 0.0094706695635  
ACTTAAATA 0.0587465314602  
ACTTAAATC 0.126821437392  
ACTTAAATG -0.0184169795166  
ACTTACAA -0.0315347208501  
ACTTACAC 0.0128883483157  
ACTTACAG -0.198216412491  
ACTTACAT 0.0962216958689  
ACTTACCA 0.124882692878  
ACTTACCC -0.0706898893609  
ACTTACCG -0.0808238838579  
ACTTACCT -0.0846958096649  
ACTTACGA 0.102943355658  
ACTTACGC -0.0933868929147  
ACTTACGG 0.0134812395767  
ACTTACTA 0.0870207603911  
ACTTACTC -0.0380405818201  
ACTTACTG -0.0303025313399  
ACTTAGAA 0.0783025583659  
ACTTAGAC -0.0966398314154  
ACTTAGAG -0.12051476762  
ACTTAGAT 0.341111094969  
ACTTAGCA -0.119572007613

ACTTAGCC -0.132752320758  
ACTTAGCG -0.103180875235  
ACTTAGCT -0.20004967075  
ACTTAGGA -0.00823482279078  
ACTTAGGC -0.0399928106512  
ACTTAGGG -0.037753281694  
ACTTAGTA -0.0309446969198  
ACTTAGTC -0.212589687727  
ACTTAGTG -0.0204509464937  
ACTTATAA -0.155723489962  
ACTTATAC 0.174618279023  
ACTTATAG -0.0603114228633  
ACTTATAT 0.0895689567504  
ACTTATCA -0.0641550110116  
ACTTATCC 0.183601725614  
ACTTATCG -0.00381938895588  
ACTTATCT 0.192629290957  
ACTTATGA 0.116210247992  
ACTTATGC -0.124767587794  
ACTTATGG -0.0599523484375  
ACTTATTA 0.134152936558  
ACTTATTC 0.00817485798963  
ACTTATTG -0.11689277443  
ACTTCAAA 0.0335812764226  
ACTTCAAC -0.0866273741515  
ACTTCAAG -0.0519560721873  
ACTTCAAT 0.111174872518  
ACTTCACA 0.188085656589  
ACTTCACC -0.140067389956  
ACTTCACG -0.28982095924  
ACTTCACT -0.268131687243  
ACTTCAGA 0.0402569309209  
ACTTCAGC -0.0562826865983  
ACTTCAGG 0.0211585325693  
ACTTCATA -0.00239565324772  
ACTTCATC -0.151820845887  
ACTTCATG -0.193903978052  
ACTTCCAA -0.0588162654541  
ACTTCCAC -0.177265414017  
ACTTCCAG -0.224139233409  
ACTTCCAT -0.00997727946261  
ACTTCCCA -0.235143064633  
ACTTCCCC -0.208020591576  
ACTTCCCG -0.173426277989  
ACTTCCCT -0.168881251943  
ACTTCCGA -0.104909222948  
ACTTCCGC -0.178148230995  
ACTTCCGG -0.163379970716  
ACTTCCTA 0.00448418187007  
ACTTCCTC -0.0795513641818  
ACTTCCTG 0.0463882480781  
ACTTCGAA 0.140197911169  
ACTTCGAC -0.0605042431849  
ACTTCGAG -0.180217337614

ACTTCGAT 0.155855045409  
ACTTCGCA -0.214085693537  
ACTTCGCC -0.147111118859  
ACTTCGCG -0.125118673274  
ACTTCGCT 0.025259891569  
ACTTCGGA -0.102522308933  
ACTTCGGC -0.152025988849  
ACTTCGGG -0.201086419753  
ACTTCGTA 0.145604184505  
ACTTCGTC -0.107996141957  
ACTTCGTG 0.0315237436607  
ACTTCTAA 0.0279647843331  
ACTTCTAC -0.067949615522  
ACTTCTAG -0.163555555556  
ACTTCTAT -0.00874435227289  
ACTTCTCA -0.00053608007787  
ACTTCTCC -0.0625531681348  
ACTTCTCG -0.0647535315618  
ACTTCTCT -0.0346824299106  
ACTTCTGA 0.107310649295  
ACTTCTGC -0.143682702756  
ACTTCTGG -0.164740645629  
ACTTCTTA 0.0942809690803  
ACTTCTTC -0.111198754209  
ACTTCTTG -0.00400118553646  
ACTTGAAA 0.0760181023412  
ACTTGAAC 0.0502700388593  
ACTTGAAG -0.0889289457367  
ACTTGAAT -0.035225800786  
ACTTGACA -0.0733953513899  
ACTTGACC 0.0530856879405  
ACTTGACG -0.0679015394748  
ACTTGACT -0.201109368827  
ACTTGAGA -0.0814840529525  
ACTTGAGC -0.223993074116  
ACTTGAGG 0.0136228262607  
ACTTGATA 0.158310281236  
ACTTGATC 0.0312669795011  
ACTTGATG -0.103608572761  
ACTTGCAA -0.0359987215434  
ACTTGCAC -0.0417517398845  
ACTTGCAG 0.0174262817347  
ACTTGCAT 0.0607862507809  
ACTTGCCA 0.0757616259643  
ACTTGCCC -0.185978169605  
ACTTGCCG -0.15593696981  
ACTTG CCT 0.0530196272137  
ACTTGCGA 0.030876089486  
ACTTGCGC 0.0588859994479  
ACTTGCGG -0.0915271571436  
ACTTGCTA -0.184985590443  
ACTTGCTC -0.0792502222661  
ACTTGCTG -0.155841483091  
ACTTGCAA 0.126623368182

ACTTGGAC 0.0722560399808  
ACTTGGAG -0.125  
ACTTGGAT 0.294007552306  
ACTTGGCA -0.318894375857  
ACTTGGCC -0.222271604938  
ACTTGGCG 0.160678609849  
ACTTGGCT -0.129275584615  
ACTTGGGA 0.0136180700714  
ACTTGGGC -0.353006519814  
ACTTGGGG -0.0290136998242  
ACTTGGTA -0.0610545841703  
ACTTGGTC -0.23922085048  
ACTTGGTG -0.28412220357  
ACTTGTA -0.00382482226851  
ACTTGTAC -0.127121746027  
ACTTGTAG -0.174024449764  
ACTTGTAT 0.0331069609508  
ACTTGTCA -0.0122862192364  
ACTTGTCC -0.286010967689  
ACTTGTCCG -0.267157750343  
ACTTGTCT -0.144548895661  
ACTTGTGA -0.0816920626297  
ACTTGTGC -0.188826202152  
ACTTGTGG -0.169665739232  
ACTTGTTA -0.126231604027  
ACTTGTTTC -0.167792302106  
ACTTGTTG -0.0691062265031  
ACTTTAAA 0.109774638302  
ACTTTAAC -0.00375546612817  
ACTTTAAG -0.0412577663615  
ACTTTAAT 0.125072276379  
ACTTTACA -0.0481453126544  
ACTTTACC -0.0785472787547  
ACTTTACG 0.0981462379963  
ACTTTACT -0.0503988442161  
ACTTTAGA 0.0159471119015  
ACTTTAGC -0.0924645317088  
ACTTTAGG -0.138427188923  
ACTTTATA 0.105916156227  
ACTTTATC -0.0940745131617  
ACTTTATG -0.0393333507651  
ACTTTCAA 0.0217439309633  
ACTTTCAC -0.0368504248172  
ACTTTCAG -0.0514912905147  
ACTTTCAT -0.140583408798  
ACTTTCCA -0.0337875728212  
ACTTTCCC 0.0241642816672  
ACTTTCCG -0.0403137280731  
ACTTTCCT -0.212351488744  
ACTTTCGA 0.0478289863663  
ACTTTCGC -0.0730082485429  
ACTTTCGG -0.0257647006834  
ACTTTCTA 0.0494065346563  
ACTTTCTC 0.0637250059562

ACTTTCTG -0.0162588397999  
ACTTTGAA -0.062276339766  
ACTTTGAC -0.266169790057  
ACTTTGAG -0.0852170143176  
ACTTTGAT 0.135927534758  
ACTTTGCA 0.0225874051329  
ACTTTGCC -0.298829339143  
ACTTTGCG 0.0024973105886  
ACTTTGCT -0.101790574652  
ACTTTGGA -0.027021910547  
ACTTTGGC -0.117276633575  
ACTTTGGG 0.00192059041448  
ACTTTGTA -0.0333898658587  
ACTTTGTC -0.173554853015  
ACTTTGTG -0.0217274545634  
ACTTTTAA 0.000158354277745  
ACTTTTAC 0.0581218310985  
ACTTTTAG -0.134277780522  
ACTTTTAT 0.130683439812  
ACTTTTCA -0.0594002876527  
ACTTTTCC -0.151594759459  
ACTTTTCG 0.0952856914561  
ACTTTTCT -0.107318221174  
ACTTTTGA -0.00731335260703  
ACTTTTGC -0.11929323366  
ACTTTTGG -0.176309344304  
ACTTTTTA 0.0678816846571  
ACTTTTTC 0.0996317152956  
ACTTTTTG -0.0631318706858  
AGAAAAAA 0.0222495024189  
AGAAAAAC -0.12201016703  
AGAAAAAG -0.00218935684919  
AGAAAAAT 0.227074139937  
AGAAAACA 0.0788175920437  
AGAAAACC 0.0192910382226  
AGAAAACG -0.11031772551  
AGAAAACT -0.163471314452  
AGAAAAGA 0.183593492722  
AGAAAAGC 0.0313371314409  
AGAAAAGG -0.140137420835  
AGAAAATA 0.146863816988  
AGAAAATC 0.478374936881  
AGAAAATG 0.18401784028  
AGAAACAA 0.0111997431591  
AGAAACAC -0.0443624424331  
AGAAACAG -0.0139629849173  
AGAAACAT 0.0991076837477  
AGAAACCA 0.0688386108778  
AGAAACCC -0.141631730481  
AGAAACCG -0.0776615831518  
AGAAACCT -0.00537287743391  
AGAAACGA 0.0809471667874  
AGAAACGC 0.00683633357252  
AGAAACGG -0.0543803179823

AGAAACTA 0.12244853486  
AGAAACTC -0.171962403044  
AGAAACTG -0.0669969896588  
AGAAAGAA 0.211775610542  
AGAAAGAC -0.0490999837311  
AGAAAGAG -0.0207044758423  
AGAAAGAT 0.203278337614  
AGAAAGCA -0.15917312821  
AGAAAGCC -0.135163398693  
AGAAAGCG -0.0879899458878  
AGAAAGCT -0.132456815772  
AGAAAGGA 0.0279764066654  
AGAAAGGC -0.138482853224  
AGAAAGGG -0.181217388442  
AGAAAGTA 0.25347870934  
AGAAAGTC 0.131439861694  
AGAAAGTG -0.0977447978105  
AGAAATAA 0.229153167812  
AGAAATAC 0.130162857932  
AGAAATAG 0.14675248364  
AGAAATAT 0.363448335474  
AGAAATCA 0.377451222524  
AGAAATCC 0.457439019075  
AGAAATCG 0.293865065767  
AGAAATCT 0.460943152267  
AGAAATGA -0.0948774570337  
AGAAATGC 0.00814289657577  
AGAAATGG -0.0405198088126  
AGAAATTA 0.231202728949  
AGAAATTC 0.139870410995  
AGAAATTG 0.108509088215  
AGAACAAA -0.0158538057916  
AGAACAAC -0.217160712262  
AGAACAAG -0.104100810037  
AGAACAAT 0.148738250548  
AGAACACA -0.0780737720902  
AGAACACC -0.186464341232  
AGAACACG -0.0511288527857  
AGAACACT -0.0878518189203  
AGAACAGA 0.129835377794  
AGAACAGC -0.193969498911  
AGAACAGG -0.237687726943  
AGAACATA 0.0775510988167  
AGAACATC 0.0280082987552  
AGAACATG 0.0566422973062  
AGAACCAA 0.00541175437441  
AGAACCAC 0.0209307558893  
AGAACCAG -0.0848929560255  
AGAACCAT -0.166559232295  
AGAACCCA -0.0635332469449  
AGAACCCC -0.15820134567  
AGAACCCG -0.211628460955  
AGAACCCT -0.292615085831  
AGAACCGA 0.177824979692



AGAACCGC -0.229240377633  
AGAACCGG -0.277837172008  
AGAACCTA -0.076421193323  
AGAACCTC -0.168950972161  
AGAACCTG -0.300361347443  
AGAACGAA 0.0727823875142  
AGAACGAC -0.158414504129  
AGAACGAG -0.16625512371  
AGAACGAT -0.0326543941689  
AGAACGCA -0.125011661536  
AGAACGCC -0.205299575836  
AGAACGCG -0.128170938483  
AGAACGCT -0.125708061002  
AGAACGGA 0.0239492685195  
AGAACGGC -0.217387725537  
AGAACGGG -0.0365442665435  
AGAACGTA -0.104220180465  
AGAACGTC 0.0169822942513  
AGAACGTG -0.168680682461  
AGAATAA 0.0506899163538  
AGAATAAC 0.0109344045483  
AGAATAG 0.0438072185997  
AGAATAT -0.0480718566818  
AGAATCA 0.0654130716371  
AGAATCC -0.202588235294  
AGAATCG -0.115800910811  
AGAATCT -0.150440421131  
AGAATGA 0.0469556753301  
AGAATGC -0.0287120725704  
AGAATGG -0.0212260914904  
AGAATTA -0.0462029901864  
AGAATTC -0.00880601520266  
AGAATTG -0.151956104252  
AGAAGAAA -0.0897227984677  
AGAAGAAC -0.230230452675  
AGAAGAAG -0.117281045752  
AGAAGAAT 0.251200732207  
AGAAGACA 0.0228893750418  
AGAAGACC -0.252248213125  
AGAAGACG -0.10057904094  
AGAAGACT -0.101958605019  
AGAAGAGA 0.0741426815078  
AGAAGAGC -0.177221458926  
AGAAGAGG -0.260711620352  
AGAAGATA 0.271276537355  
AGAAGATC 0.402659772992  
AGAAGATG -0.0353822257349  
AGAAGCAA -0.102698572267  
AGAAGCAC -0.187970234273  
AGAAGCAG -0.152304751835  
AGAAGCAT -0.043869776746  
AGAAGCCA -0.266716148655  
AGAAGCCC -0.375117260788  
AGAAGCCG -0.252411560679

AGAAGCCT -0.324313609313  
AGAAGCGA 0.0306785989278  
AGAAGCGC -0.211678491668  
AGAAGCGG -0.276378208946  
AGAAGCTA -0.24389336928  
AGAAGCTC -0.213695473251  
AGAAGCTG -0.0320838889163  
AGAAGGAA -0.0187662341436  
AGAAGGAC -0.338742949942  
AGAAGGAG -0.236700901969  
AGAAGGAT 0.165977917202  
AGAAGGCA -0.106369038107  
AGAAGGCC -0.309076941397  
AGAAGGCG -0.18024691358  
AGAAGGCT -0.231253848567  
AGAAGGGA -0.141758228991  
AGAAGGGC -0.249973938187  
AGAAGGGG -0.133111111111  
AGAAGGTA -0.127491168336  
AGAAGGTC -0.193981118373  
AGAAGGTG -0.234264928567  
AGAAGTAA 0.0224064039051  
AGAAGTAC -0.236641367994  
AGAAGTAG -0.14509513435  
AGAAGTAT 0.244811355019  
AGAAGTCA -0.219838487577  
AGAAGTCC -0.0458819073964  
AGAAGTCG -0.136333948056  
AGAAGTCT 0.0285255618671  
AGAAGTGA 0.00487242214875  
AGAAGTGC -0.267731940947  
AGAAGTGG -0.122267219808  
AGAAGTTA -0.00528967778335  
AGAAGTTC -0.0121320260792  
AGAAGTTG -0.105878511494  
AGAATAAA 0.0527784783304  
AGAATAAC 0.148563296454  
AGAATAAG 0.14083797016  
AGAATAAT 0.247191027559  
AGAATACA 0.128518297909  
AGAATACC -0.134975520868  
AGAATACG 0.120182180059  
AGAATACT 0.0538979999561  
AGAATAGA -0.0246151313081  
AGAATAGC -0.235150333898  
AGAATAGG -0.0106780609893  
AGAATATA 0.290401406302  
AGAATATC 0.432139015127  
AGAATATG 0.288674306036  
AGAATCAA 0.371608094954  
AGAATCAC 0.334880072058  
AGAATCAG 0.400944587148  
AGAATCAT 0.382162616084  
AGAATCCA 0.437592462112

AGAATCCC 0.426947830256  
AGAATCCG 0.480637194369  
AGAATCCT 0.43471154824  
AGAATCGA 0.334079782213  
AGAATCGC 0.384020745863  
AGAATCGG 0.372404224718  
AGAATCTA 0.473523019166  
AGAATCTC 0.460646782793  
AGAATCTG 0.482180058983  
AGAATGAA -0.141433892534  
AGAATGAC -0.0525227725074  
AGAATGAG -0.0935984706522  
AGAATGAT 0.15637702846  
AGAATGCA 0.0958479217817  
AGAATGCC -0.114144724418  
AGAATGCG 0.186865311696  
AGAATGCT -0.268460552953  
AGAATGGA -0.0424765232584  
AGAATGGC -0.175877907838  
AGAATGGG -0.229723762684  
AGAATGTA 0.0187737381721  
AGAATGTC -0.107821186129  
AGAATGTG 0.130565435026  
AGAATTAA 0.137560472448  
AGAATTAC 0.21571000461  
AGAATTAG 0.115155521334  
AGAATTAT 0.17950714607  
AGAATTCA 0.147718390888  
AGAATTCC 0.22083448346  
AGAATTCCG 0.262959626923  
AGAATTCT 0.245417734702  
AGAATTGA -0.101646029551  
AGAATTGC 0.131041796813  
AGAATTGG 0.0550533491405  
AGAATTTA 0.224661136374  
AGAATTTTC 0.255312427688  
AGAATTTG 0.343783617643  
AGACAAAA -0.116884418607  
AGACAAAC -0.211778458296  
AGACAAAG -0.183541031227  
AGACAAAT 0.0966091845481  
AGACAACA -0.170677713994  
AGACAACC -0.297940450254  
AGACAACG -0.248677509987  
AGACAACT -0.193863143124  
AGACAAGA -0.0290950717934  
AGACAAGC -0.106738210891  
AGACAAGG -0.1965817242  
AGACAATA 0.149807505121  
AGACAATC 0.318572487034  
AGACAATG -0.145172088327  
AGACACAA -0.0800660050666  
AGACACAC -0.0769796212469  
AGACACAG -0.0998588095847

AGACACAT -0.135170630366  
AGACACCA -0.0764595502909  
AGACACCC -0.287020264107  
AGACACCG -0.253239596249  
AGACACCT -0.149280348549  
AGACACGA -0.0457527639359  
AGACACGC -0.10720001976  
AGACACGG 0.132475465982  
AGACACTA -0.122736383442  
AGACACTC -0.23296151053  
AGACACTG -0.10236955947  
AGACAGAA -0.0502253057098  
AGACAGAC -0.030835500414  
AGACAGAG -0.0889413508056  
AGACAGAT 0.156276756899  
AGACAGCA -0.164482207698  
AGACAGCC -0.202127265544  
AGACAGCG -0.138246850169  
AGACAGCT -0.231922355033  
AGACAGGA -0.194486564996  
AGACAGGC -0.276538552023  
AGACAGGG -0.140967621062  
AGACAGTA 0.0511339037961  
AGACAGTC -0.355176139483  
AGACAGTG -0.338603358607  
AGACATAA -0.166648267367  
AGACATAC -0.0840246454615  
AGACATAG -0.0313525983346  
AGACATAT 0.0134772442864  
AGACATCA 0.0347742317953  
AGACATCC -0.116968605175  
AGACATCG -0.0336919584938  
AGACATCT -0.0876440079613  
AGACATGA 0.032835517794  
AGACATGC 0.0222562515094  
AGACATGG 0.0278281967699  
AGACATTA 0.119769587262  
AGACATTC -0.0966004677989  
AGACATTG -0.0715916749948  
AGACCAA 0.0185487057894  
AGACCAAC -0.258292733777  
AGACCAAG -0.232425596515  
AGACCAAT -0.24337149547  
AGACCACA 0.00940101404849  
AGACCACC -0.383081882469  
AGACCACG -0.254322714134  
AGACCACT -0.180256486237  
AGACCAGA -0.20328843601  
AGACCAGC -0.117873660725  
AGACCAGG -0.243830674676  
AGACCATA 0.0171352546056  
AGACCATC -0.191629907609  
AGACCATG -0.274633744856  
AGACCAA -0.143384309788

AGACCCAC -0.331172237583  
AGACCCAG -0.195946873028  
AGACCCAT -0.223855644287  
AGACCCCA -0.28203374373  
AGACCCCC -0.411396363038  
AGACCCCG -0.129371992732  
AGACCCCT -0.248244821606  
AGACCCGA -0.274840083071  
AGACCCGC -0.18421603  
AGACCCGG -0.295138717447  
AGACCCTA -0.0578008146853  
AGACCCTC -0.265070636298  
AGACCCTG -0.310155924243  
AGACCGAA -0.100021400234  
AGACCGAC -0.210255734971  
AGACCGAG -0.0405895428065  
AGACCGAT -0.0210734593515  
AGACCGCA -0.088749531521  
AGACCGCC -0.294623018812  
AGACCGCG -0.144199294363  
AGACCGCT -0.28624691358  
AGACCGGA -0.0265333004034  
AGACCGGC -0.106336741246  
AGACCGGG -0.269619058592  
AGACCGTA 0.0479784405736  
AGACCGTC -0.195202216775  
AGACCGTG -0.349821631363  
AGACCTAA 0.0690053568684  
AGACCTAC -0.14507437953  
AGACCTAG -0.221382107444  
AGACCTAT -0.109206944993  
AGACCTCA -0.235468481666  
AGACCTCC -0.20645751634  
AGACCTCG -0.193846372796  
AGACCTCT -0.266652142338  
AGACCTGA -0.0982629455833  
AGACCTGC -0.18079974977  
AGACCTGG -0.0733667232203  
AGACCTTA -0.204441244359  
AGACCTTC -0.347839445213  
AGACCTTG -0.141527686189  
AGACGAAA 0.180089491959  
AGACGAAC 0.0842546453009  
AGACGAAG -0.0364578036698  
AGACGAAT 0.112398745431  
AGACGACA -0.090634032731  
AGACGACC -0.341264171545  
AGACGACG -0.200270520904  
AGACGACT -0.0813594771242  
AGACGAGA 0.0749685122987  
AGACGAGC -0.290336168164  
AGACGAGG -0.182030178326  
AGACGATA 0.0466331556085  
AGACGATC 0.268454084523

AGACGATG -0.0455041873841  
AGACGCAA 0.0560440404839  
AGACGCAC -0.129737109659  
AGACGCAG -0.22510681061  
AGACGCAT -0.0965136124419  
AGACGCCA -0.339659052957  
AGACGCCC -0.30549118344  
AGACGCCG -0.270510288066  
AGACGCCT -0.299764232459  
AGACGCGA 0.0715388224835  
AGACGCGC -0.160631696377  
AGACGCGG -0.240267970306  
AGACGCTA -0.0815473025779  
AGACGCTC -0.220875104943  
AGACGCTG -0.0420624546115  
AGACGGAA -0.148893772532  
AGACGGAC -0.328050947867  
AGACGGAG -0.225523122767  
AGACGGAT 0.280901602429  
AGACGGCA -0.151654320988  
AGACGGCC -0.253611975351  
AGACGGCG -0.195241387257  
AGACGGCT -0.31119560208  
AGACGGGA -0.128435185185  
AGACGGGC -0.249630374099  
AGACGGGG -0.18679542332  
AGACGGTA -0.249468462084  
AGACGGTC -0.25874904678  
AGACGGTG -0.194656843377  
AGACGTAA 0.0657446283033  
AGACGTAC -0.217718812548  
AGACGTAG -0.0739753967378  
AGACGTAT -0.0816134702831  
AGACGTCA 0.132159871786  
AGACGTCC -0.288654618474  
AGACGTCCG 0.00667687545281  
AGACGTCT 0.0186006527175  
AGACGTGA -0.101784925744  
AGACGTGC -0.18769699593  
AGACGTGG -0.127314929132  
AGACGTTA -0.297094217024  
AGACGTTC -0.218594045025  
AGACGTTG -0.143158172001  
AGACTAAA 0.0296732671829  
AGACTAAC -0.358831662232  
AGACTAAG 0.145250913761  
AGACTAAT -0.0847137149004  
AGACTACA -0.229535701568  
AGACTACC -0.104483601699  
AGACTACG -0.0684366510249  
AGACTACT 0.0450873854111  
AGACTAGA 0.138551276277  
AGACTAGC -0.301587140214  
AGACTAGG -0.144292981676

AGACTATA 0.0957985268694  
AGACTATC -0.0198673957383  
AGACTATG -0.0828613141891  
AGACTCAA -0.0893509278063  
AGACTCAC -0.373419339099  
AGACTCAG -0.0611259288529  
AGACTCAT -0.21087298844  
AGACTCCA -0.209528265107  
AGACTCCC -0.0835185276639  
AGACTCCG -0.0404050382811  
AGACTCCT -0.159946896434  
AGACTCGA -0.363931412894  
AGACTCGC -0.0295202344496  
AGACTCGG -0.19759122085  
AGACTCTA -0.117134324716  
AGACTCTC -0.197155274595  
AGACTCTG -0.202803043288  
AGACTGAA 0.148973602778  
AGACTGAC -0.267940614919  
AGACTGAG -0.134560401267  
AGACTGAT 0.102201670753  
AGACTGCA 0.0738352243837  
AGACTGCC -0.291340853987  
AGACTGCG -0.0498496360757  
AGACTGCT -0.23251983395  
AGACTGGA -0.0865709644848  
AGACTGGC -0.186100684841  
AGACTGGG -0.227939361019  
AGACTGTA -0.146747987555  
AGACTGTC -0.155707025805  
AGACTGTG -0.153273736027  
AGACTTAA 0.138330451963  
AGACTTAC -0.062002237299  
AGACTTAG -0.236267507676  
AGACTTAT -0.19485493837  
AGACTTCA -0.200822132867  
AGACTTCC -0.250292650762  
AGACTTCG -0.252684631889  
AGACTTGA -0.0887160731249  
AGACTTGC -0.174496634547  
AGACTTGG -0.205493062496  
AGACTTTA -0.0934014208301  
AGACTTTC -0.222614521094  
AGACTTTG -0.180259171442  
AGAGAAAA 0.111888193163  
AGAGAAAC -0.185494540341  
AGAGAAAG -0.0800066828411  
AGAGAAAT 0.234917341764  
AGAGAACA -0.0873026019496  
AGAGAACC 0.0108654279197  
AGAGAACG -0.178629116601  
AGAGAACT 0.0644501910421  
AGAGAAGA -0.0268927855986  
AGAGAAGC -0.0597438490758

AGAGAAGG -0.270712254684  
AGAGAATA 0.282804759345  
AGAGAATC 0.477595556434  
AGAGAATG 0.116387488559  
AGAGACAA -0.0051019518743  
AGAGACAC -0.185590864327  
AGAGACAG -0.0525303473162  
AGAGACAT -0.0564938627258  
AGAGACCA -0.224577145065  
AGAGACCC -0.327591787917  
AGAGACCG -0.256306209909  
AGAGACCT -0.140480908357  
AGAGACGA -0.190863843891  
AGAGACGC -0.174822158383  
AGAGACGG -0.331249019801  
AGAGACTA -0.103451777207  
AGAGACTC -0.145824255628  
AGAGACTG -0.128515779336  
AGAGAGAA -0.0323783650284  
AGAGAGAC -0.308168482208  
AGAGAGAG -0.248365206125  
AGAGAGAT 0.203156916014  
AGAGAGCA -0.107903667246  
AGAGAGCC -0.345265890716  
AGAGAGCG -0.117750670815  
AGAGAGCT -0.155736670234  
AGAGAGGA 0.00399081835747  
AGAGAGGC -0.387846622233  
AGAGAGGG -0.137376906318  
AGAGAGTA -0.143521033255  
AGAGAGTC -0.244218392507  
AGAGAGTG -0.152285451149  
AGAGATAA 0.113702729795  
AGAGATAC 0.237428268418  
AGAGATAG 0.11739863147  
AGAGATAT 0.365054666403  
AGAGATCA 0.102891940548  
AGAGATCC 0.332420495983  
AGAGATCG 0.330744344562  
AGAGATCT 0.400022619905  
AGAGATGA 0.0855292403438  
AGAGATGC -0.07589298685  
AGAGATGG -0.182027596224  
AGAGATTA 0.28054421571  
AGAGATTC 0.453528104252  
AGAGATTG 0.290732078925  
AGAGCAAA -0.0779302089779  
AGAGCAAC -0.1239872412  
AGAGCAAG -0.048916745088  
AGAGCAAT 0.123057037476  
AGAGCACA 0.0166061302543  
AGAGCACC -0.238065061259  
AGAGCACG -0.0915037521899  
AGAGCACT -0.0461814988612



AGAGCAGA -0.101808641975  
AGAGCAGC -0.057904210018  
AGAGCAGG -0.221981118373  
AGAGCATA 0.0685804773873  
AGAGCATC -0.0708918687258  
AGAGCATG -0.208621776529  
AGAGCCAA -0.23133697704  
AGAGCCAC -0.288022689449  
AGAGCCAG -0.178097312999  
AGAGCCAT -0.174015491804  
AGAGCCCA -0.311811864323  
AGAGCCCC -0.249753110804  
AGAGCCCG -0.295009264691  
AGAGCCCT -0.215254439142  
AGAGCCGA -0.151512202491  
AGAGCCGC -0.320727185083  
AGAGCCGG -0.273380623995  
AGAGCCTA -0.00235764775609  
AGAGCCTC -0.316660906203  
AGAGCCTG -0.231644951225  
AGAGCGAA -0.0741975308642  
AGAGCGAC -0.15198265373  
AGAGCGAG -0.0651811242269  
AGAGCGAT 0.0958226305737  
AGAGCGCA -0.00309008760333  
AGAGCGCC -0.285411602058  
AGAGCGCG 0.0259830073108  
AGAGCGCT -0.0888773645478  
AGAGCGGA -0.0419791761449  
AGAGCGGC -0.280137174211  
AGAGCGGG -0.278750214223  
AGAGCGTA -0.0352165462421  
AGAGCGTC -0.137476064282  
AGAGCGTG -0.21136571902  
AGAGCTAA -0.00164601281362  
AGAGCTAC -0.192179524054  
AGAGCTAG -0.00394336050054  
AGAGCTAT -0.0781277691103  
AGAGCTCA -0.276946502058  
AGAGCTCC -0.331259566484  
AGAGCTCG 0.0278108675061  
AGAGCTCT -0.279289064429  
AGAGCTGA -0.178687219653  
AGAGCTGC -0.0985508200679  
AGAGCTGG -0.119249491008  
AGAGCTTA -0.246750907771  
AGAGCTTC -0.265771862764  
AGAGCTTG -0.254567450128  
AGAGGAAA 0.0799809403165  
AGAGGAAC -0.31428337522  
AGAGGAAG -0.257682264057  
AGAGGAAT 0.184213703923  
AGAGGACA -0.0732590177611  
AGAGGACC -0.184912638834

AGAGGACG -0.161474903666  
AGAGGACT -0.184254717398  
AGAGGAGA -0.057520504127  
AGAGGAGC -0.220547325103  
AGAGGAGG -0.129136687513  
AGAGGATA 0.238290083207  
AGAGGATC 0.362827422893  
AGAGGATG 0.0432638477244  
AGAGGCAA 0.0270320921651  
AGAGGCAC -0.246487141924  
AGAGGCAG -0.26859782574  
AGAGGCAT -0.0160239522273  
AGAGGCCA -0.278245023015  
AGAGGCCC -0.194658639906  
AGAGGCCG -0.119629923387  
AGAGGCCT -0.301328977903  
AGAGGCCG -0.125320955955  
AGAGGCCG -0.318603489389  
AGAGGCCG -0.222705653021  
AGAGGCTA -0.0540181697216  
AGAGGCTC -0.246029578803  
AGAGGCTG -0.267282498184  
AGAGGGAA -0.0344585132285  
AGAGGGAC -0.284498318493  
AGAGGGAG -0.237715203607  
AGAGGGAT 0.0892308283387  
AGAGGGCA -0.221509168662  
AGAGGGCC -0.243065701912  
AGAGGGCG -0.211026361957  
AGAGGGCT -0.356917152167  
AGAGGGGA -0.0500954826814  
AGAGGGGC -0.0532473644305  
AGAGGGGG -0.306311068769  
AGAGGGTA 0.00575160170267  
AGAGGGTC -0.31827025834  
AGAGGGTG -0.305400556351  
AGAGGTAA 0.0813107861863  
AGAGGTAC -0.264371789806  
AGAGGTAG -0.0934127874206  
AGAGGTAT -0.109534019564  
AGAGGTCA -0.366024849831  
AGAGGTCC -0.351654448072  
AGAGGTCC -0.131561328702  
AGAGGTGA -0.00375382791663  
AGAGGTGC -0.103952664329  
AGAGGTGG -0.188036310821  
AGAGGTTA -0.16805644732  
AGAGGTTC -0.230800250181  
AGAGGTTG -0.179272331155  
AGAGTAAA 0.0154119739182  
AGAGTAAC -0.229237166992  
AGAGTAAG 0.189975797688  
AGAGTAAT 0.204436431096  
AGAGTACA 0.0143637499455

AGAGTACC -0.236024655282  
AGAGTACG -0.167522802858  
AGAGTACT -0.158651761852  
AGAGTAGA -0.0302310986629  
AGAGTAGC -0.119130065973  
AGAGTAGG -0.228850627794  
AGAGTATA 0.190142809408  
AGAGTATC 0.370207603911  
AGAGTATG -0.0874624853646  
AGAGTCAA -0.214602437673  
AGAGTCAC -0.294553333876  
AGAGTCAG -0.160214701961  
AGAGTCAT 0.0553411880929  
AGAGTCCA -0.19582441701  
AGAGTCCC -0.216225127088  
AGAGTCCG -0.325858815268  
AGAGTCCT -0.344804884873  
AGAGTCGA 0.0261478261824  
AGAGTCGC -0.303818940177  
AGAGTCGG -0.276119099492  
AGAGTCTA -0.308633097966  
AGAGTCTC -0.0211698029338  
AGAGTCTG -0.291055918664  
AGAGTGAA -0.0930384287467  
AGAGTGAC -0.123052362151  
AGAGTGAG -0.14319186506  
AGAGTGAT 0.0857977123537  
AGAGTGCA 0.0951011869307  
AGAGTGCC -0.085838629304  
AGAGTGCG -0.077569952266  
AGAGTGCT 0.0159923202292  
AGAGTGGA 0.102066457572  
AGAGTGGC -0.269835368475  
AGAGTGGG -0.28935001641  
AGAGTGTA 0.0187163133962  
AGAGTGTC -0.163878873688  
AGAGTGTG -0.103584731334  
AGAGTTAA -0.0219763331797  
AGAGTTAC 0.0585578632816  
AGAGTTAG 0.0799304046192  
AGAGTTAT -0.0168538346433  
AGAGTTCA 0.0361178504496  
AGAGTTCC -0.202493430475  
AGAGTTCG -0.178448871772  
AGAGTTGA -0.0980159767611  
AGAGTTGC -0.113525615699  
AGAGTTGG -0.0434451042369  
AGAGTTTA -0.023499418209  
AGAGTTTC -0.0845546475788  
AGAGTTTG -0.0740066537852  
AGATAAAA 0.137599069134  
AGATAAAC -0.092913282873  
AGATAAAG -0.171356439176  
AGATAAAT -0.0160942284896

AGATAACA 0.172188192935  
AGATAACC 0.18106286229  
AGATAACG 0.126946377464  
AGATAACT 0.0472404224718  
AGATAAGA -0.0267322004874  
AGATAAGC 0.157797858585  
AGATAAGG -0.00155578604238  
AGATAATA 0.110410704168  
AGATAATC 0.357527058772  
AGATAATG 0.138800111569  
AGATACAA 0.0295423609739  
AGATACAC 0.221681595644  
AGATACAG 0.213670991679  
AGATACAT 0.123092583011  
AGATACCA 0.111067202354  
AGATACCC 0.358726993347  
AGATACCG 0.318508564206  
AGATACCT 0.169850051593  
AGATACGA 0.298932505186  
AGATACGC 0.439012056149  
AGATACGG 0.385080482662  
AGATACTA 0.109774638302  
AGATACTC 0.379075281565  
AGATACTG 0.333097323761  
AGATAGAA 0.096226895847  
AGATAGAC -0.351269690386  
AGATAGAG -0.0561087208018  
AGATAGAT 0.310651715735  
AGATAGCA 0.11690758793  
AGATAGCC -0.0280082987552  
AGATAGCG 0.308978251711  
AGATAGCT 0.0667817099674  
AGATAGGA 0.164001278457  
AGATAGGC -0.0600162712652  
AGATAGGG -0.091829500385  
AGATAGTA 0.0873713330404  
AGATAGTC -0.00519902730688  
AGATAGTG 0.183151660849  
AGATATAA 0.223937646187  
AGATATAC 0.238180311313  
AGATATAG 0.190331672308  
AGATATAT 0.328667219598  
AGATATCA 0.418672341576  
AGATATCC 0.47929772057  
AGATATCG 0.460023820501  
AGATATCT 0.476239108282  
AGATATGA 0.320507605364  
AGATATGC 0.40662139219  
AGATATGG 0.351754667589  
AGATATTA 0.379793122485  
AGATATTC 0.458728512152  
AGATATTG 0.409830621968  
AGATCAAA 0.177748073694  
AGATCAAC 0.106025928121

AGATCAAG 0.175154359101  
AGATCAAT 0.171413420888  
AGATCACA 0.183113240686  
AGATCACC 0.297538971133  
AGATCACG 0.258296010889  
AGATCACT 0.0816323565732  
AGATCAGA 0.322680981506  
AGATCAGC 0.0174611015065  
AGATCAGG 0.230310925615  
AGATCATA 0.15870723343  
AGATCATC 0.0783795563175  
AGATCATG 0.122692045929  
AGATCCAA 0.171945142591  
AGATCCAC 0.278783432365  
AGATCCAG 0.207622797205  
AGATCCAT 0.191925179477  
AGATCCCA 0.210650414772  
AGATCCCC 0.368890768547  
AGATCCCG 0.345998285706  
AGATCCCT 0.304576293348  
AGATCCGA 0.293302267887  
AGATCCGC 0.377436694609  
AGATCCGG 0.298489096799  
AGATCCTA 0.308167594032  
AGATCCTC 0.376451733298  
AGATCCTG 0.399719611233  
AGATCGAA 0.177679531933  
AGATCGAC 0.143637696722  
AGATCGAG 0.0347675031285  
AGATCGAT 0.174374210045  
AGATCGCA 0.407672166782  
AGATCGCC 0.333890425695  
AGATCGCG 0.460364941235  
AGATCGCT 0.350726689938  
AGATCGGA 0.301830517339  
AGATCGGC 0.056467862835  
AGATCGGG 0.265486069947  
AGATCGTA 0.261915739094  
AGATCGTC 0.333745441867  
AGATCGTG 0.325351303961  
AGATCTAA 0.281024281543  
AGATCTAC 0.37747535621  
AGATCTAG 0.356665349404  
AGATCTAT 0.346025590357  
AGATCTCA 0.401998611606  
AGATCTCC 0.430291692775  
AGATCTCG 0.415245555969  
AGATCTGA 0.284616904609  
AGATCTGC 0.390709398108  
AGATCTGG 0.350713827002  
AGATCTTA 0.336689608993  
AGATCTTC 0.439136448967  
AGATCTTG 0.340040871828  
AGATGAAA 0.155632775683

AGATGAAC 0.0547426379789  
AGATGAAG -0.125688918329  
AGATGAAT 0.031393372365  
AGATGACA -0.0193088761553  
AGATGACC -0.041019569102  
AGATGACG -0.0138449801313  
AGATGACT -0.155472976507  
AGATGAGA 0.114132756091  
AGATGAGC -0.27360260715  
AGATGAGG -0.259506429603  
AGATGATA 0.131391468528  
AGATGATC 0.0878202595008  
AGATGATG -0.00454592856045  
AGATGCAA 0.116737565445  
AGATGCAC -0.166865205037  
AGATGCAG 0.0381812394703  
AGATGCAT -0.0944816806557  
AGATGCCA 0.13120886784  
AGATGCCC -0.0641927817259  
AGATGCCG -0.061143408319  
AGATGCCT -0.269591142634  
AGATGCGA -0.0185201865384  
AGATGCGC -0.10291720541  
AGATGCGG 0.0662230218633  
AGATGCTA -0.0655891796086  
AGATGCTC 0.201128819026  
AGATGCTG 0.0496286303467  
AGATGGAA -0.168409844305  
AGATGGAC -0.325612097587  
AGATGGAG -0.216763979666  
AGATGGAT 0.100024149817  
AGATGGCA -0.179480326307  
AGATGGCC -0.224119302587  
AGATGGCG 0.0591387851757  
AGATGGCT -0.161275187673  
AGATGGGA 0.00598985951506  
AGATGGGC -0.233301576605  
AGATGGGG -0.324952655366  
AGATGGTA 0.0574477358244  
AGATGGTC -0.0413510788817  
AGATGGTG -0.10589281149  
AGATGTAA 0.00349686923423  
AGATGTAC -0.0213533776812  
AGATGTAG 0.0335930554184  
AGATGTAT 0.0443435561431  
AGATGTCA 0.0639887813124  
AGATGTCC -0.0375648308224  
AGATGTCCG 0.0402031002571  
AGATGTGA -0.0613993288103  
AGATGTGC 0.136619063531  
AGATGTGG -0.16277544524  
AGATGTGA 0.0682187322941  
AGATGTTC 0.031965575534  
AGATGTTG 0.0405991349975

AGATTAAG 0.131251348744  
AGATTAAT 0.191557443632  
AGATTACA 0.485663790643  
AGATTACC 0.446596224296  
AGATTACG 0.487249994511  
AGATTACT 0.429086339401  
AGATTAGA 0.23434258619  
AGATTAGC -0.00211090610608  
AGATTAGG 0.164284616567  
AGATTATA 0.305508902501  
AGATTATC 0.390009152587  
AGATTATG 0.331901980638  
AGATTCAA 0.255044818619  
AGATTCAC 0.312206732194  
AGATTCAG 0.191537489286  
AGATTCAT 0.225817251751  
AGATTCCA 0.425015617509  
AGATTCCC 0.496484244476  
AGATTCCG 0.462486016881  
AGATTCCT 0.457351851583  
AGATTCGA 0.38307849107  
AGATTCGC 0.487508898348  
AGATTCGG 0.406719160868  
AGATTCTA 0.450529542516  
AGATTCTC 0.487743968034  
AGATTCTG 0.472565484579  
AGATTGAA 0.0238737233594  
AGATTGAC -0.0677553294255  
AGATTGAG 0.0565133153307  
AGATTGAT 0.149804599538  
AGATTGCA 0.462452459745  
AGATTGCC 0.446723228684  
AGATTGCG 0.493753979231  
AGATTGCT 0.421252387539  
AGATTGGA 0.150665563568  
AGATTGGC 0.150376517596  
AGATTGGG 0.229174898745  
AGATTGTA 0.334313047487  
AGATTGTC 0.395962692313  
AGATTGTG 0.401199806801  
AGATTTAA 0.259504888644  
AGATTTAC 0.35527388126  
AGATTTAG 0.227380745001  
AGATTTAT 0.190594195262  
AGATTTCA 0.474387472831  
AGATTTCC 0.496454367824  
AGATTTCG 0.488081298215  
AGATTTGA 0.388768139805  
AGATTTGC 0.466280708381  
AGATTTGG 0.425823369605  
AGATTTTA 0.396881833096  
AGATTTTC 0.486135809787

AGATTTTG 0.467027443232  
AGCAAAA -0.0579811549585  
AGCAAAAC -0.11169275849  
AGCAAAAG -0.0731337877441  
AGCAAAAT 0.262250664652  
AGCAAACA -0.0357636830666  
AGCAAACC -0.0499812608404  
AGCAAACG -0.024565252132  
AGCAAAC T 0.0123642480702  
AGCAAAGA 0.0939318096994  
AGCAAAGC -0.200241426612  
AGCAAAGG -0.134317341148  
AGCAAATA 0.173839582758  
AGCAAATC 0.419358447256  
AGCAAATG -0.0828657765897  
AGCAACAA 0.0853936338675  
AGCAACAC -0.0193618492542  
AGCAACAG -0.0887033927141  
AGCAACAT -0.174835148874  
AGCAACCA -0.00874058706009  
AGCAACCC -0.201101180189  
AGCAACCG -0.193005854886  
AGCAACCT -0.226177748855  
AGCAACGA -0.0908838945144  
AGCAACGC -0.082486843044  
AGCAACGG -0.172240686081  
AGCAACTA -0.00109976319498  
AGCAACTC -0.0156834098483  
AGCAACTG -0.163162545139  
AGCAAGAA -0.010464457455  
AGCAAGAC -0.0712839506173  
AGCAAGAG -0.0691445936798  
AGCAAGAT 0.324218034954  
AGCAAGCA -0.147564320078  
AGCAAGCC -0.243775487679  
AGCAAGCG 0.00714738132732  
AGCAAGCT -0.250942340296  
AGCAAGGA -0.113553294478  
AGCAAGGC -0.114999012248  
AGCAAGGG -0.122701305543  
AGCAAGTA -0.144738069757  
AGCAAGTC -0.189001345019  
AGCAAGTG -0.0937724656053  
AGCAATAA 0.036094605785  
AGCAATAC 0.150507750643  
AGCAATAG -0.0877384639522  
AGCAATAT 0.299647083361  
AGCAATCA 0.31395036115  
AGCAATCC 0.421911018903  
AGCAATCG 0.32820740052  
AGCAATGA -0.073465498408  
AGCAATGC -0.137066085694  
AGCAATGG -0.243779230211  
AGCAATTA 0.077389185273



AGCAATTC 0.132937689771  
AGCAATTG 0.11213102905  
AGCACAAA 0.128835155547  
AGCACAAC -0.0259099664164  
AGCACAAG -0.0411672045489  
AGCACAAAT 0.0178928187227  
AGCACACA -0.0680037191463  
AGCACACC -0.283234190378  
AGCACACG -0.142355794823  
AGCACACT -0.251584604212  
AGCACAGA -0.148485183001  
AGCACAGC -0.119838996444  
AGCACAGG -0.18278109723  
AGCACATA 0.00173318030596  
AGCACATC 0.00425640519002  
AGCACATG -0.111893197223  
AGCACCAA -0.044663439373  
AGCACCCAC -0.33568677792  
AGCACCCAG -0.239432098765  
AGCACCCAT -0.128587105624  
AGCACCCA -0.0630411782902  
AGCACCCC -0.183839144607  
AGCACCCG -0.201653495052  
AGCACCCCT -0.227601929123  
AGCACCGA -0.0544580712761  
AGCACCGC -0.0900211859755  
AGCACCGG -0.191936092956  
AGCACCTA -0.0892113771777  
AGCACCTC -0.325489905635  
AGCACCTG -0.251930136468  
AGCACGAA 0.0471827043404  
AGCACGAC -0.15495676321  
AGCACGAG -0.169031666859  
AGCACGAT 0.165601879295  
AGCACGCA -0.033223324889  
AGCACGCC -0.248509137192  
AGCACGCG -0.0247310961294  
AGCACGCT -0.213237472767  
AGCACGGA -0.0568216815522  
AGCACGGC -0.349532807708  
AGCACGGG -0.207136547441  
AGCACGTA -0.109942594185  
AGCACGTC -0.222321002288  
AGCACGTG -0.202834847886  
AGCACTAA -0.0481789258059  
AGCACTAC -0.016621387997  
AGCACTAG -0.103753933045  
AGCACTAT -0.106110441213  
AGCACTCA 0.00147596329849  
AGCACTCC -0.239004686797  
AGCACTCG -0.127421975537  
AGCACTGA 0.0345232606643  
AGCACTGC -0.123642137252  
AGCACTGG -0.133641716189

AGCACTTA -0.149511135647  
AGCACTTC -0.263660337246  
AGCACTTG -0.263724263576  
AGCAGAAA -0.00232579200422  
AGCAGAAC 0.0801801356781  
AGCAGAAG -0.155619885368  
AGCAGAAT 0.287498078992  
AGCAGACA -0.0987218325705  
AGCAGACC -0.192274401366  
AGCAGACG -0.06589827475  
AGCAGACT -0.0420645504736  
AGCAGAGA 0.052257073077  
AGCAGAGC -0.139826088978  
AGCAGAGG -0.163665294925  
AGCAGATA 0.227764299101  
AGCAGATC 0.325880028475  
AGCAGATG -0.110733770225  
AGCAGCAA 0.111699330263  
AGCAGCAC -0.133249914935  
AGCAGCAG -0.0787441606433  
AGCAGCAT -0.129891188042  
AGCAGCCA -0.194382713001  
AGCAGCCC -0.242988679825  
AGCAGCCG -0.260139917695  
AGCAGCCT -0.228620767222  
AGCAGCGA 0.0157380907414  
AGCAGCGC -0.0972229082627  
AGCAGCGG -0.352211141829  
AGCAGCTA -0.27808776088  
AGCAGCTC -0.185985328571  
AGCAGCTG -0.233822111449  
AGCAGGAA -0.0900887814628  
AGCAGGAC -0.278336397513  
AGCAGGAG -0.370670704971  
AGCAGGAT 0.22155216248  
AGCAGGCA -0.236547505279  
AGCAGGCC -0.293534426014  
AGCAGGCG -0.124421205519  
AGCAGGCT -0.163432098765  
AGCAGGGA -0.224063009234  
AGCAGGGC -0.183649445158  
AGCAGGGG -0.0970280919533  
AGCAGGTA -0.170126361656  
AGCAGGTC -0.272154674629  
AGCAGGTG -0.17678140886  
AGCAGTAA -0.0803228391403  
AGCAGTAC -0.0252660888033  
AGCAGTAG -0.164910750051  
AGCAGTAT 0.150379261894  
AGCAGTCA -0.0706332718318  
AGCAGTCC -0.145679012346  
AGCAGTCG -0.285330428468  
AGCAGTGA -0.0728639950085  
AGCAGTGC -0.324478240832

AGCAGTGG -0.184678927862  
AGCAGTTA -0.0409533658888  
AGCAGTTC -0.131741093718  
AGCAGTTG 0.0255384311401  
AGCATAAA 0.0382679819273  
AGCATAAC -0.0552234955762  
AGCATAAG -0.29668592878  
AGCATAAT 0.193867766914  
AGCATACA -0.131387656559  
AGCATACC -0.0184722444176  
AGCATACG -0.130204793028  
AGCATACT -0.141142188095  
AGCATAGA -0.070331407122  
AGCATAGC -0.222801125982  
AGCATAGG 0.0640572309596  
AGCATATA 0.205324211289  
AGCATATC 0.362533959002  
AGCATATG 0.130320552654  
AGCATCAA -0.000695887147153  
AGCATCAC -0.093357837084  
AGCATCAG -0.00278271751301  
AGCATCAT 0.106822309067  
AGCATCCA -0.0968421745859  
AGCATCCC -0.202876004214  
AGCATCCG -0.0886188310839  
AGCATCCT -0.0293784253164  
AGCATCGA 0.0636482501126  
AGCATCGC -0.130609053498  
AGCATCGG -0.0127033524336  
AGCATCTA 0.136006803813  
AGCATCTC 0.129528090628  
AGCATCTG -0.13758260335  
AGCATGAA 0.0538273793093  
AGCATGAC -0.341955252705  
AGCATGAG -0.223528249704  
AGCATGAT 0.18316581053  
AGCATGCA -0.0671761568473  
AGCATGCC -0.195886216603  
AGCATGCG -0.0879273479443  
AGCATGCT -0.101598117151  
AGCATGGA 0.0159021380074  
AGCATGGC -0.3068659602  
AGCATGGG -0.24296846368  
AGCATGTA 0.0692531198698  
AGCATGTC -0.0811915150517  
AGCATGTG -0.140322571794  
AGCATTAA 0.0331639583128  
AGCATTAC 0.0745151308239  
AGCATTAG -0.0656364220093  
AGCATTAT -0.00510027662517  
AGCATTCA -0.0573417552341  
AGCATTCC -0.180185009253  
AGCATTCCG -0.11772630493  
AGCATTGA -0.131728706036

AGCATTGC -0.0166039544986  
AGCATTGG -0.117662874984  
AGCATTTA 0.0603073064173  
AGCATTTT -0.109013118708  
AGCATTTG -0.0608114782437  
AGCCAAAA 0.0235715427193  
AGCCAAAC -0.192661003556  
AGCCAAAG -0.210808275317  
AGCCAAAT 0.0527764054935  
AGCCAACA -0.120923747277  
AGCCAACC -0.114192652595  
AGCCAACG -0.289674897119  
AGCCAACT -0.093328026588  
AGCCAAGA 0.0345768031959  
AGCCAAGC -0.264237976776  
AGCCAAGG -0.262135583966  
AGCCAATA -0.128393842101  
AGCCAATC 0.0737248122267  
AGCCAATG -0.0789264271681  
AGCCACAA -0.0839916900324  
AGCCACAC -0.137635802469  
AGCCACAG -0.221140858694  
AGCCACAT -0.0313988890697  
AGCCACCA -0.0212847702474  
AGCCACCC -0.303754112594  
AGCCACCG -0.129006205406  
AGCCACCT -0.259990298707  
AGCCACGA -0.019308818903  
AGCCACGC -0.197795775923  
AGCCACGG -0.363411409039  
AGCCACTA -0.103964960811  
AGCCACTC -0.269236889613  
AGCCACTG -0.265595504631  
AGCCAGAA 0.0119492104078  
AGCCAGAC -0.12366422416  
AGCCAGAG -0.191773794435  
AGCCAGAT 0.0924338616652  
AGCCAGCA -0.205661299209  
AGCCAGCC -0.35136522008  
AGCCAGCG -0.0483027359293  
AGCCAGCT -0.329558671846  
AGCCAGGA -0.0787528761011  
AGCCAGGC -0.205150290646  
AGCCAGGG -0.235945808023  
AGCCAGTA -0.147660493827  
AGCCAGTC -0.241298527443  
AGCCAGTG -0.22991483775  
AGCCATAA -0.0139931721882  
AGCCATAC -0.203447955309  
AGCCATAG -0.292702331962  
AGCCATAT 0.105273633286  
AGCCATCA -0.0402902677495  
AGCCATCC -0.286267603702  
AGCCATCG -0.174137061512

AGCCATGA -0.0494167041971  
AGCCATGC -0.286278188937  
AGCCATGG -0.217597726487  
AGCCATTA -0.131070189609  
AGCCATTC -0.216808631789  
AGCCATTG -0.060406681191  
AGCCCAAA -0.148287158214  
AGCCCAAC -0.150173954081  
AGCCCAAG -0.264476431959  
AGCCCAAT -0.103049398749  
AGCCCACA -0.275004501653  
AGCCCACC -0.238054828676  
AGCCCACG -0.166085693537  
AGCCCACT -0.38206249764  
AGCCCAGA -0.10440000416  
AGCCCAGC -0.399404039289  
AGCCCAGG -0.337319670869  
AGCCCATA 0.0541504753123  
AGCCCATC -0.266123015481  
AGCCCATG -0.126422657952  
AGCCCCAA -0.300699155296  
AGCCCCAC -0.224106995885  
AGCCCCAG -0.204508419337  
AGCCCCAT -0.253419246531  
AGCCCCCA -0.401501812816  
AGCCCCCC -0.287422132516  
AGCCCCCG -0.247941320079  
AGCCCCCT -0.358984064291  
AGCCCCGA -0.0364429284506  
AGCCCCGC -0.256594033552  
AGCCCCGG -0.227742938969  
AGCCCCCTA -0.242345301003  
AGCCCCCTC -0.298797983289  
AGCCCCCTG -0.149482365601  
AGCCCCGAA -0.178690124805  
AGCCCCGAC -0.274154943692  
AGCCCCGAG -0.0970699588477  
AGCCCCGAT 0.149869109948  
AGCCCCGCA -0.184073049739  
AGCCCCGCC -0.339960936643  
AGCCCCGCG -0.2609890562  
AGCCCCGCT -0.337000466277  
AGCCCCGGA -0.321348234468  
AGCCCCGGC -0.371978298059  
AGCCCCGGG -0.348253670419  
AGCCCCGTA -0.262892367455  
AGCCCCGTC -0.28023331742  
AGCCCCGTG -0.192190368838  
AGCCCTAA -0.136607569098  
AGCCCTAC -0.18355265069  
AGCCCTAG -0.30355171893  
AGCCCTAT -0.285327160494  
AGCCCTCA -0.193559068978  
AGCCCTCC -0.266714398578

AGCCCTCG -0.245253918277  
AGCCCTGA -0.220171387073  
AGCCCTGC -0.284691594177  
AGCCCTGG -0.380741218288  
AGCCCTTA -0.337743718432  
AGCCCTTC -0.195451495496  
AGCCCTTG -0.268031625054  
AGCCGAAA 0.0340741568885  
AGCCGAAC -0.147724653429  
AGCCGAAG -0.17945805347  
AGCCGAAT 0.121308920064  
AGCCGACA -0.177033950617  
AGCCGACC -0.222631041749  
AGCCGACG -0.221368998628  
AGCCGACT -0.190594045025  
AGCCGAGA -0.0387643746622  
AGCCGAGC -0.225761290098  
AGCCGAGG -0.106360541056  
AGCCGATA 0.145327689624  
AGCCGATC -0.0568042108499  
AGCCGATG -0.0703767734146  
AGCCGCAA -0.0495252148573  
AGCCGCAC -0.136533455737  
AGCCGCAG -0.283884170562  
AGCCGCAT -0.114335501221  
AGCCGCCA -0.23606927091  
AGCCGCCC -0.312306673521  
AGCCGCCG -0.359900161826  
AGCCGCCT -0.205975299462  
AGCCGCGA -0.0862033012863  
AGCCGCGC -0.369975919853  
AGCCGCGG 0.0947476743229  
AGCCGCTA -0.295268505717  
AGCCGCTC -0.259156845963  
AGCCGCTG -0.255785920926  
AGCCGGAA -0.0538767742217  
AGCCGGAC -0.196996714425  
AGCCGGAG -0.30368212589  
AGCCGGAT 0.241908677524  
AGCCGGCA -0.205246155947  
AGCCGGCC -0.403257130631  
AGCCGGCG -0.242856893918  
AGCCGGCT -0.166392898176  
AGCCGGGA -0.00999180666043  
AGCCGGGC -0.354616870199  
AGCCGGGG -0.189049076726  
AGCCGGTA -0.339432529368  
AGCCGGTC -0.301062494917  
AGCCGGTG -0.202758402029  
AGCCGTAA -0.00153697752933  
AGCCGTAC -0.0691433024371  
AGCCGTAG -0.102113067312  
AGCCGTAT 0.0577470108814  
AGCCGTCA -0.25495311617

AGCCGTCC -0.258345916641  
AGCCGTCG -0.31039249568  
AGCCGTGA -0.0991633986928  
AGCCGTGC -0.0858331412515  
AGCCGTGG -0.244619728292  
AGCCGTTA -0.104147116445  
AGCCGTTC -0.214302908355  
AGCCGTTG -0.0080831028579  
AGCCTAAA -0.0689909717077  
AGCCTAAC -0.165047768157  
AGCCTAAG 0.0685858063466  
AGCCTAAT -0.141299635026  
AGCCTACA -0.141764195137  
AGCCTACC -0.00201685929731  
AGCCTACG -0.178847003045  
AGCCTACT -0.142822692645  
AGCCTAGA -0.107637173872  
AGCCTAGC -0.262230012563  
AGCCTAGG -0.360055078284  
AGCCTATA 0.0896415963273  
AGCCTATC -0.0826521288156  
AGCCTATG -0.310594683777  
AGCCTCAA -0.0126987262859  
AGCCTCAC -0.175276145324  
AGCCTCAG -0.208659815979  
AGCCTCAT -0.10857415901  
AGCCTCCA -0.33132549949  
AGCCTCCC -0.364908527387  
AGCCTCCG -0.225176808827  
AGCCTCCT -0.120073100859  
AGCCTCGA -0.0793604912951  
AGCCTCGC -0.158230036051  
AGCCTCGG -0.191975387547  
AGCCTCTA -0.126408999001  
AGCCTCTC -0.269296342445  
AGCCTCTG -0.152849650604  
AGCCTGAA -0.18207697894  
AGCCTGAC -0.192583877996  
AGCCTGAG -0.186484618044  
AGCCTGAT 0.0176476399114  
AGCCTGCA -0.283519606714  
AGCCTGCC -0.305288454557  
AGCCTGCG -0.170161220044  
AGCCTGGA -0.129199968623  
AGCCTGGC -0.0832057676164  
AGCCTGGG -0.303624377423  
AGCCTGTA -0.149485849155  
AGCCTGTC -0.155264746228  
AGCCTGTG -0.0601490555062  
AGCCTTAA -0.157426611797  
AGCCTTAC -0.00493650323246  
AGCCTTAG -0.123710965868  
AGCCTTAT -0.112140978891  
AGCCTTCA -0.273480181585

AGCCTTCC -0.393642598712  
AGCCTTCG -0.20202643752  
AGCCTTGA 0.00178653757492  
AGCCTTGC -0.42568549692  
AGCCTTGG -0.247219273122  
AGCCTTTA -0.194237301156  
AGCCTTTC -0.198074845186  
AGCCTTTG -0.314823957956  
AGCGAAAA 0.230050992983  
AGCGAAAC -0.125801822112  
AGCGAAAG -0.10646867729  
AGCGAAAT 0.388368844541  
AGCGAACA 0.143027289293  
AGCGAACCC -0.245009355743  
AGCGAACG -0.173268896403  
AGCGAACT -0.283069436215  
AGCGAAGA 0.0613470283149  
AGCGAAGC -0.368935774754  
AGCGAAGG -0.301617434194  
AGCGAATA 0.113586506472  
AGCGAATC 0.462329030275  
AGCGAATG -0.0451962382227  
AGCGACAA -0.174068501586  
AGCGACAC -0.143380718712  
AGCGACAG 0.049515357088  
AGCGACAT 0.0841907224732  
AGCGACCA -0.238123583356  
AGCGACCC -0.3050214783  
AGCGACCG -0.223606092644  
AGCGACCT -0.277120665065  
AGCGACGA 0.0826623857743  
AGCGACGC -0.0781393902946  
AGCGACGG -0.295028806584  
AGCGACTA -0.100602528645  
AGCGACTC -0.170727713198  
AGCGACTG -0.215293652892  
AGCGAGAA 0.109096796856  
AGCGAGAC -0.220305778955  
AGCGAGAG -0.0226670652923  
AGCGAGAT 0.330113463019  
AGCGAGCA -0.0571290991703  
AGCGAGCC -0.289024216669  
AGCGAGCG -0.202713301013  
AGCGAGCT -0.258652004763  
AGCGAGGA -0.0537663620647  
AGCGAGGC -0.197461147422  
AGCGAGGG -0.228225476157  
AGCGAGTA 0.00136707683814  
AGCGAGTC 0.00442344438523  
AGCGAGTG -0.131922978595  
AGCGATAA -0.118666767379  
AGCGATAC 0.126807967407  
AGCGATAG -0.16677916063  
AGCGATAT 0.35793442099



AGCGATCA 0.159715543417  
AGCGATCC 0.264392079381  
AGCGATCG 0.206052822235  
AGCGATGA -0.0915408717029  
AGCGATGC -0.0663493357041  
AGCGATGG -0.26237037037  
AGCGATTA 0.160441939186  
AGCGATTC 0.294610143391  
AGCGATTG 0.104541426351  
AGCGCAAA 0.0160547992968  
AGCGCAAC -0.0886284550704  
AGCGCAAG -0.0282181722395  
AGCGCAAT 0.321338602124  
AGCGCACA -0.162522950705  
AGCGCACC -0.280545816667  
AGCGCACG -0.318326474623  
AGCGCACT -0.134915285751  
AGCGCAGA 0.000713068602756  
AGCGCAGC -0.33660515922  
AGCGCAGG -0.182589849108  
AGCGCATA 0.141852018654  
AGCGCATC 0.0222585724994  
AGCGCATG -0.203404624899  
AGCGCCAA -0.13065795207  
AGCGCCAC -0.271041081486  
AGCGCCAG -0.115750181554  
AGCGCCAT -0.238011485272  
AGCGCCCA -0.249253523254  
AGCGCCCC -0.269463653208  
AGCGCCCCG -0.311485312996  
AGCGCCCT -0.268357298475  
AGCGCCGA -0.0641014032257  
AGCGCCGC -0.262326474623  
AGCGCCGG -0.201969498911  
AGCGCCTA -0.220572983996  
AGCGCCTC -0.335311092458  
AGCGCCTG -0.188158934476  
AGCGCGAA 0.0667514128398  
AGCGCGAC 0.0156813355065  
AGCGCGAG -0.0963563988203  
AGCGCGAT 0.365230340098  
AGCGCGCA 0.00573878790872  
AGCGCGCC -0.240912682734  
AGCGCGCG 0.0178296998836  
AGCGCGCT 0.170292376134  
AGCGCGGA -0.0634818729046  
AGCGCGGC -0.312207922719  
AGCGCGGG -0.220129357164  
AGCGCGTA -0.0265584821234  
AGCGCGTC -0.240321881465  
AGCGCGTG -0.0934904555926  
AGCGCTAA -0.254689077659  
AGCGCTAC -0.18465932474  
AGCGCTAG -0.176951267057

AGCGCTAT -0.241147710998  
AGCGCTCA -0.111266646391  
AGCGCTCC -0.148651244477  
AGCGCTCG -0.204161772197  
AGCGCTGA -0.125461173063  
AGCGCTGC -0.176474219676  
AGCGCTGG -0.120629345233  
AGCGCTTA -0.136622323202  
AGCGCTTC -0.238763117603  
AGCGCTTG -0.128807336429  
AGCGGAAA 0.244752049788  
AGCGGAAC -0.102738673472  
AGCGGAAG 0.0240916420903  
AGCGGAAT 0.246122307844  
AGCGGACA -0.280923182442  
AGCGGACC -0.185832743397  
AGCGGACG -0.184135137805  
AGCGGACT -0.181076025294  
AGCGGAGA 0.198975781965  
AGCGGAGC 0.0184663768689  
AGCGGAGG -0.240897672325  
AGCGGATA 0.285271599378  
AGCGGATC 0.325665015327  
AGCGGATG -0.149798059616  
AGCGGCAA -0.171209876543  
AGCGGCAC -0.168594719595  
AGCGGCAG -0.271967882887  
AGCGGCAT -0.15594123106  
AGCGGCCA -0.268769065332  
AGCGGCCC -0.287303658118  
AGCGGCCG -0.222555388323  
AGCGGCCT -0.241242694984  
AGCGGCGA -0.0290543779873  
AGCGGCGC -0.186342296697  
AGCGGCGG -0.104334035735  
AGCGGCTA -0.289140728304  
AGCGGCTC -0.32151125155  
AGCGGCTG -0.351909447955  
AGCGGGAA -0.0311315300973  
AGCGGGAC -0.264460469682  
AGCGGGAG -0.179598139448  
AGCGGGAT 0.235353685042  
AGCGGGCA -0.0891300165855  
AGCGGGCC -0.36906276136  
AGCGGGCG -0.25955461189  
AGCGGGGA -0.0993782343612  
AGCGGGGC -0.280288178077  
AGCGGGGG -0.261109190767  
AGCGGGTA -0.170321348611  
AGCGGGTC -0.195761801017  
AGCGGGTG -0.212108094917  
AGCGGTAA 0.0749538738686  
AGCGGTAC -0.127245193745  
AGCGGTAG -0.0861027014777

AGCGGTAT 0.000780149056412  
AGCGGTCA -0.142671342256  
AGCGGTCC -0.276025037578  
AGCGGTCCG -0.140319256489  
AGCGGTGA -0.0821919311647  
AGCGGTGC -0.195650910866  
AGCGGTGG -0.118859900126  
AGCGGTTA -0.00336568586412  
AGCGGTTC -0.180384765228  
AGCGGTTG -0.255866812677  
AGCGTAAA 0.236963375125  
AGCGTAAC -0.146215001728  
AGCGTAAG -0.0875001815989  
AGCGTAAT 0.376734395925  
AGCGTACA -0.0897406346384  
AGCGTACC -0.25653223594  
AGCGTACG -0.177828262874  
AGCGTACT -0.0261504094492  
AGCGTAGA 0.0478912730812  
AGCGTAGC -0.179959504173  
AGCGTAGG -0.187767845874  
AGCGTATA -0.128712971976  
AGCGTATC 0.388521153044  
AGCGTATG -0.0387585412036  
AGCGTCAA -0.095522496477  
AGCGTCAC -0.208020792723  
AGCGTCAG -0.216295782053  
AGCGTCAT -0.179883040936  
AGCGTCCA -0.0853214260813  
AGCGTCCC -0.281231123966  
AGCGTCCG -0.168274167761  
AGCGTCCT -0.392410504243  
AGCGTCGA -0.0766233992609  
AGCGTCGC -0.146923753947  
AGCGTCGG -0.228696844993  
AGCGTCTA -0.0338079119027  
AGCGTCTC -0.397487588798  
AGCGTCTG -0.0311693942288  
AGCGTGAA -0.0874470350611  
AGCGTGAC -0.251702416032  
AGCGTGAG -0.265440849657  
AGCGTGAT 0.154074353871  
AGCGTGCA -0.115394112999  
AGCGTGCC -0.208821312541  
AGCGTGCG -0.077019743437  
AGCGTGGA 0.0067081604426  
AGCGTGGC -0.288409586057  
AGCGTGGG -0.0503251186872  
AGCGTGTA -0.103624035475  
AGCGTGTC -0.305266146553  
AGCGTGTG -0.128319943808  
AGCGTTAA 0.12062673427  
AGCGTTAC 0.0367687010591  
AGCGTTAG -0.0466082121099

AGCGTTAT 0.0135829299615  
AGCGTTCA -0.350219962261  
AGCGTTCC -0.254717188177  
AGCGTTCG -0.209682641598  
AGCGTTGA -0.0568641011708  
AGCGTTGC -0.0196388314314  
AGCGTTGG -0.0248441881074  
AGCGTTTA -0.0343076721921  
AGCGTTTC -0.180691358025  
AGCGTTTG -0.0266073927719  
AGCTAAAA -0.0191769121714  
AGCTAAAC 0.0203393598103  
AGCTAAAG -0.126052702675  
AGCTAAAT 0.141786504497  
AGCTAACA -0.151612938633  
AGCTAACC -0.18353121287  
AGCTAACG -0.04583067944  
AGCTAACT -0.25944216724  
AGCTAAGA -0.200189867861  
AGCTAAGC -0.0965648944274  
AGCTAAGG -0.264667314097  
AGCTAATA 0.100961475962  
AGCTAATC -0.0955728995148  
AGCTAATG -0.10895715689  
AGCTACAA 0.00979036218093  
AGCTACAC 0.0215976201453  
AGCTACAG -0.163018844111  
AGCTACAT -0.138512920152  
AGCTACCA -0.305911976719  
AGCTACCC -0.0399308471227  
AGCTACCG -0.165412770534  
AGCTACCT -0.250589506173  
AGCTACGA -0.0497217904203  
AGCTACGC -0.0543561954295  
AGCTACGG -0.129295822565  
AGCTACTA -0.157270893552  
AGCTACTC -0.29207797271  
AGCTACTG -0.0472108694974  
AGCTAGAA 0.0839094475803  
AGCTAGAC -0.140015144781  
AGCTAGAG -0.193670900783  
AGCTAGAT 0.210744985673  
AGCTAGCA -0.0752504047639  
AGCTAGCC -0.237430874438  
AGCTAGCG -0.194561048282  
AGCTAGCT -0.230746445498  
AGCTAGGA -0.0297781729176  
AGCTAGGC -0.237598515253  
AGCTAGGG -0.235838134431  
AGCTAGTA -0.129766844497  
AGCTAGTC -0.152145996938  
AGCTAGTG -0.17291831292  
AGCTATAA -0.0541668724991  
AGCTATAC -0.0429330125886

AGCTATAG -0.0817059650047  
AGCTATAT 0.0729588560703  
AGCTATCA -0.177114111314  
AGCTATCC -0.0301461063909  
AGCTATCG -0.126772816088  
AGCTATGA 0.0303007853015  
AGCTATGC -0.14766349066  
AGCTATGG -0.156609003376  
AGCTATTA 0.0311959689769  
AGCTATTC -0.0316895804177  
AGCTATTG -0.106767262417  
AGCTCAAA -0.181652868555  
AGCTCAAC 0.0231325955933  
AGCTCAAG -0.273754092027  
AGCTCAAT -0.201985739278  
AGCTCACA -0.349492500036  
AGCTCACC -0.231385473757  
AGCTCACG -0.045785184126  
AGCTCACT -0.141065951131  
AGCTCAGA -0.102260752157  
AGCTCAGC -0.379496187888  
AGCTCAGG -0.19729189984  
AGCTCATA -0.0107288549388  
AGCTCATC -0.163447266221  
AGCTCATG -0.25251121729  
AGCTCCAA -0.183871056241  
AGCTCCAC -0.223914951989  
AGCTCCAG -0.275259507977  
AGCTCCAT -0.188260709068  
AGCTCCCA -0.209651577503  
AGCTCCCC -0.246071025062  
AGCTCCCG -0.192798933175  
AGCTCCCT -0.122344044954  
AGCTCCGA 0.0162087952  
AGCTCCGC -0.240957432902  
AGCTCCGG -0.172919916004  
AGCTCCTA -0.105246257966  
AGCTCCTC -0.287755600666  
AGCTCCTG -0.338838690564  
AGCTCGAA -0.0618362886496  
AGCTCGAC -0.176608187135  
AGCTCGAG 0.061351511559  
AGCTCGAT 0.0545538870228  
AGCTCGCA -0.138692810458  
AGCTCGCC -0.216036258971  
AGCTCGCG -0.158501654403  
AGCTCGGA -0.0124082925341  
AGCTCGGC -0.12730573711  
AGCTCGGG -0.16816349293  
AGCTCGTA -0.0722650248035  
AGCTCGTC -0.169185558354  
AGCTCGTG -0.300954350339  
AGCTCTAA -0.200155731561  
AGCTCTAC -0.137576873803

AGCTCTAG -0.121868266399  
AGCTCTAT -0.168706184504  
AGCTCTCA -0.0843075588926  
AGCTCTCC -0.301458244994  
AGCTCTCG -0.248573247289  
AGCTCTGA -0.212569122149  
AGCTCTGC -0.270059747185  
AGCTCTGG -0.155349719521  
AGCTCTTA -0.0218555478708  
AGCTCTTC -0.338459892696  
AGCTCTTG -0.0799302832244  
AGCTGAAA 0.0743819766868  
AGCTGAAC -0.286084637796  
AGCTGAAG -0.0351736591363  
AGCTGAAT -0.0478387358438  
AGCTGACA -0.191023950078  
AGCTGACC -0.280723988852  
AGCTGACG -0.201301427372  
AGCTGACT -0.218946016694  
AGCTGAGA 0.0555857398444  
AGCTGAGC -0.0853200083418  
AGCTGAGG -0.300425251331  
AGCTGATA 0.103033428733  
AGCTGATC 0.0361204417221  
AGCTGATG -0.220855832126  
AGCTGCAA -0.0525946049779  
AGCTGCAC -0.0547152378683  
AGCTGCAG -0.0858014630425  
AGCTGCAT -0.213713484011  
AGCTGCCA -0.147196838726  
AGCTGCCC -0.229283388663  
AGCTGCCG -0.340156426613  
AGCTGCCT -0.342078208721  
AGCTGCGA -0.16116194626  
AGCTGCGC -0.118760233918  
AGCTGCGG -0.315383602456  
AGCTGCTA -0.331276024951  
AGCTGCTC -0.316032323749  
AGCTGCTG -0.133154151677  
AGCTGGAA 0.049240927353  
AGCTGGAC -0.285598249166  
AGCTGGAG -0.23139688654  
AGCTGGAT 0.209834463984  
AGCTGGCA -0.112989336765  
AGCTGGCC -0.30483141876  
AGCTGGCG -0.137084958928  
AGCTGGGA -0.311201623742  
AGCTGGGC -0.247075445816  
AGCTGGGG -0.101729727845  
AGCTGGTA -0.186921645283  
AGCTGGTC -0.265263533943  
AGCTGGTG -0.230965198209  
AGCTGTAA -0.0208065790773  
AGCTGTAC -0.128166919142

AGCTGTAG 0.00475723945641  
AGCTGTAT -0.101695530783  
AGCTGTCA -0.102938997283  
AGCTGTCC -0.292528999355  
AGCTGTCCG 0.0562167867802  
AGCTGTGA -0.0453029493109  
AGCTGTGC -0.157251028807  
AGCTGTGG -0.257372749768  
AGCTGTGA -0.200078508035  
AGCTGTTC -0.0591184460942  
AGCTGTTG -0.165953002763  
AGCTTAAA 0.0224325541528  
AGCTTAAC -0.167901417494  
AGCTTAAG -0.189015182036  
AGCTTAAT -0.15448586155  
AGCTTACA -0.112516052554  
AGCTTACC -0.18799492929  
AGCTTACG -0.163878735992  
AGCTTACT -0.0258408031032  
AGCTTAGA -0.159524527439  
AGCTTAGC -0.109081822989  
AGCTTAGG -0.129257806826  
AGCTTATA -0.091416916049  
AGCTTATC 0.00467067568902  
AGCTTATG -0.153351384015  
AGCTTCAA -0.254145876777  
AGCTTCAC -0.159053931124  
AGCTTCAG -0.180177562926  
AGCTTCAT -0.244639809464  
AGCTTCCA -0.0299815929866  
AGCTTCCC -0.124234567901  
AGCTTCCG -0.0650649414786  
AGCTTCCT -0.272743645606  
AGCTTCGA -0.189442578691  
AGCTTCGC -0.273492667029  
AGCTTCGG -0.165957879448  
AGCTTCTA -0.0272550149557  
AGCTTCTC -0.0783751979428  
AGCTTCTG -0.0985003248863  
AGCTTGAA -0.0955352487583  
AGCTTGAC -0.332169253779  
AGCTTGAG -0.177280965714  
AGCTTGAT 0.0132563283497  
AGCTTGCA -0.0102089714455  
AGCTTGCC -0.259607339577  
AGCTTGCG 0.0958471698058  
AGCTTGGA -0.207638441224  
AGCTTGGC -0.255587654321  
AGCTTGGG -0.150784574157  
AGCTTGTA -0.0910667632659  
AGCTTGTC -0.10320992963  
AGCTTGTG -0.205689561525  
AGCTTTAA -0.0620269347551  
AGCTTTAC 0.0250032931568

AGCTTTAG -0.255794194622  
AGCTTTAT -0.177672981855  
AGCTTTCA -0.294717956315  
AGCTTTCC -0.102783402754  
AGCTTTTC -0.210063700558  
AGCTTTGA 0.0733358580869  
AGCTTTGC -0.05362077706  
AGCTTTGG -0.32413362382  
AGCTTTTA 0.168538277459  
AGCTTTTC -0.128631718748  
AGCTTTTG -0.0517319827257  
AGGAAAAA 0.219875847988  
AGGAAAAC -0.18018173737  
AGGAAAAG -0.117005020104  
AGGAAAAT 0.241513518225  
AGGAAACA -0.0555068063284  
AGGAAACC 0.0187814877013  
AGGAAACG -0.202457347204  
AGGAAACT -0.285029164678  
AGGAAAGA -0.0784826969112  
AGGAAAGC -0.0512556069445  
AGGAAAGG -0.235002193065  
AGGAAATA 0.183438329559  
AGGAAATC 0.4885041384  
AGGAAATG -0.130922012191  
AGGAACAA 0.168228901835  
AGGAACAC -0.0508719654067  
AGGAACAG -0.175201161946  
AGGAACAT 0.0181302004435  
AGGAACCA -0.0425379810753  
AGGAACCC -0.112262092569  
AGGAACCG -0.10971861956  
AGGAACCT -0.302444444444  
AGGAACGA -0.0538249675333  
AGGAACGC -0.217862879684  
AGGAACGG 0.000921947284371  
AGGAACTA 0.10725830795  
AGGAACTC -0.336342141419  
AGGAACTG -0.162146025991  
AGGAAGAA -0.0589876786394  
AGGAAGAC -0.278477366255  
AGGAAGAG -0.249927225471  
AGGAAGAT 0.273628400184  
AGGAAGCA -0.0741207202164  
AGGAAGCC -0.223475808797  
AGGAAGCG -0.181279185255  
AGGAAGGA -0.254025864292  
AGGAAGGC -0.259656052004  
AGGAAGGG -0.122669980959  
AGGAAGTA 0.0542712243957  
AGGAAGTC -0.292993892703  
AGGAAGTG 0.0420316582142  
AGGAATAA 0.226477125797  
AGGAATAC 0.061845485082



AGGAATAG -0.197208852431  
AGGAATAT 0.358814704139  
AGGAATCA 0.294862929118  
AGGAATCC 0.412838371863  
AGGAATCG 0.283532569321  
AGGAATGA -0.0154940217628  
AGGAATGC -0.220905576195  
AGGAATGG -0.189954974582  
AGGAATTA 0.160741728688  
AGGAATTC 0.0273057586336  
AGGAATTG 0.0116797295221  
AGGACAAA -0.0195000137208  
AGGACAAC -0.207614601857  
AGGACAAG -0.22427154693  
AGGACAAT 0.155135582337  
AGGACACA -0.200193783247  
AGGACACC -0.163472124985  
AGGACACG -0.144643631236  
AGGACACT -0.119117388823  
AGGACAGA -0.070415353101  
AGGACAGC -0.119102540265  
AGGACAGG -0.218025197637  
AGGACATA 0.105331620892  
AGGACATC -0.0430415596391  
AGGACATG -0.19244734931  
AGGACCAA -0.198556521167  
AGGACCAC -0.132803239826  
AGGACCAG -0.24074773359  
AGGACCAT -0.240516463778  
AGGACCCA -0.147561985965  
AGGACCCC -0.353697707175  
AGGACCCG -0.288978248684  
AGGACCCT -0.376213571086  
AGGACCGA -0.0584864984223  
AGGACCGC -0.217197521752  
AGGACCGG -0.238296148048  
AGGACCTA -0.0300771432307  
AGGACCTC -0.198939865343  
AGGACCTG -0.296805436566  
AGGACGAA -0.214382539212  
AGGACGAC -0.233445444538  
AGGACGAG -0.294486421826  
AGGACGAT 0.171526738628  
AGGACGCA -0.00806411776329  
AGGACGCC -0.193289760349  
AGGACGCG -0.119714483304  
AGGACGGA -0.116669426698  
AGGACGGC -0.301839396896  
AGGACGGG -0.271128223152  
AGGACGTA 0.0346934071  
AGGACGTC -0.127825242399  
AGGACGTG -0.22576808117  
AGGACTAA -0.239694554496  
AGGACTAC -0.337856284017

AGGACTAG -0.129717371664  
AGGACTAT -0.0929597204386  
AGGACTCA -0.135557641016  
AGGACTCC -0.401715891965  
AGGACTCG -0.156853060299  
AGGACTGA -0.115151532758  
AGGACTGC -0.148508351489  
AGGACTGG -0.195427225164  
AGGACTTA -0.19881702187  
AGGACTTC -0.218902936675  
AGGACTTG -0.0286621242718  
AGGAGAAA 0.0176924776748  
AGGAGAAC -0.106357635903  
AGGAGAAG -0.0163955568727  
AGGAGAAT 0.308266383857  
AGGAGACA -0.121968686719  
AGGAGACC -0.292756919091  
AGGAGACG -0.233195075384  
AGGAGACT -0.310818580987  
AGGAGAGA -0.0387386863859  
AGGAGAGC -0.37954803515  
AGGAGAGG -0.280706013375  
AGGAGATA 0.264643788496  
AGGAGATC 0.375187773306  
AGGAGATG -0.130874559108  
AGGAGCAA -0.126972676914  
AGGAGCAC -0.313625292123  
AGGAGCAG -0.134928958002  
AGGAGCAT -0.244919363508  
AGGAGCCA -0.133668975295  
AGGAGCCC -0.35026003094  
AGGAGCCG -0.159162800966  
AGGAGCCT -0.409744870548  
AGGAGCGA -0.194609247433  
AGGAGCGC -0.107782442853  
AGGAGCGG -0.181020835572  
AGGAGCTA -0.206799574169  
AGGAGCTC -0.289548487642  
AGGAGCTG -0.184594446204  
AGGAGGAA 0.0284616859685  
AGGAGGAC -0.379193616076  
AGGAGGAG -0.2292198138  
AGGAGGAT 0.283170862813  
AGGAGGCA -0.432801239017  
AGGAGGCC -0.267930128321  
AGGAGGCG -0.263392818236  
AGGAGGGA -0.265850286391  
AGGAGGGC -0.41236583496  
AGGAGGGG -0.317756249419  
AGGAGGTA -0.0497020428992  
AGGAGGTC -0.274387090907  
AGGAGGTG -0.13081321031  
AGGAGTAA 0.0316490636759  
AGGAGTAC -0.19586297653

AGGAGTAG -0.107571666886  
AGGAGTAT -0.0229862346045  
AGGAGTCA -0.262446008476  
AGGAGTCC -0.351798506834  
AGGAGTCG -0.0523810353894  
AGGAGTGA -0.141917902144  
AGGAGTGC -0.376180406487  
AGGAGTGG -0.21177280683  
AGGAGTTA -0.0805736499875  
AGGAGTTC -0.143409951891  
AGGAGTTG -0.100874648166  
AGGATAAA 0.0158281638168  
AGGATAAC 0.0924718435092  
AGGATAAG 0.144166172693  
AGGATAAT 0.186728242616  
AGGATACA 0.0614835907196  
AGGATACC 0.21869305583  
AGGATACG 0.348327037026  
AGGATACT 0.234187358669  
AGGATAGA -0.101149335123  
AGGATAGC 0.0503331576983  
AGGATAGG 0.0395973278672  
AGGATATA 0.243633230148  
AGGATATC 0.474305143911  
AGGATATG 0.283115656734  
AGGATCAA 0.0267239675953  
AGGATCAC 0.171828919268  
AGGATCAG 0.138994116225  
AGGATCAT 0.0473055013169  
AGGATCCA 0.218061867439  
AGGATCCC 0.349874585611  
AGGATCCG 0.223318756992  
AGGATCCT 0.323637860082  
AGGATCGA -0.100531844826  
AGGATCGC 0.367557712144  
AGGATCGG 0.0340663351555  
AGGATCTA 0.341975263704  
AGGATCTC 0.410217482893  
AGGATCTG 0.318873630596  
AGGATGAA -0.214381344307  
AGGATGAC -0.0430744912073  
AGGATGAG -0.0462125952271  
AGGATGAT 0.0188094140376  
AGGATGCA -0.096942466422  
AGGATGCC -0.104787379973  
AGGATGCG -0.11767030234  
AGGATGGA -0.0705051479304  
AGGATGGC -0.162469135802  
AGGATGGG -0.14379310946  
AGGATGTA -0.0440061151743  
AGGATGTC -0.055082591199  
AGGATGTG 0.0984861912164  
AGGATTAA -0.0594826450636  
AGGATTAC 0.442957593015

AGGATTAG 0.121694990614  
AGGATTAT 0.260693272122  
AGGATTCA 0.138883400294  
AGGATTCC 0.443977452675  
AGGATTCCG 0.369699126872  
AGGATTGA -0.100395159299  
AGGATTGC 0.456913108538  
AGGATTGG 0.0721180247846  
AGGATTTA 0.129064547528  
AGGATTTTC 0.460701988872  
AGGATTTG 0.370977583427  
AGGCAAAA -0.0867447356721  
AGGCAAAC -0.194938440492  
AGGCAAAG -0.349721605091  
AGGCAAAT 0.232968890645  
AGGCAACA 0.000265458316871  
AGGCAACC -0.23404272829  
AGGCAACG -0.0230927457663  
AGGCAACT -0.187576793593  
AGGCAAGA 0.126135719786  
AGGCAAGC -0.2721292227  
AGGCAAGG -0.267408497046  
AGGCAATA 0.0444768271532  
AGGCAATC 0.422025772522  
AGGCAATG -0.21703723718  
AGGCACAA -0.10882309366  
AGGCACAC -0.1630260631  
AGGCACAG -0.336361840806  
AGGCACAT -0.081762611048  
AGGCACCA -0.0169148518879  
AGGCACCC -0.191416836351  
AGGCACCG -0.323676804582  
AGGCACCT -0.29751891539  
AGGCACGA -0.234878721859  
AGGCACGC -0.0802980252703  
AGGCACGG -0.185498825905  
AGGCACTA -0.169763221569  
AGGCACTC -0.424172680674  
AGGCACTG -0.327026997372  
AGGCAGAA -0.0737850651916  
AGGCAGAC -0.392122496987  
AGGCAGAG 0.0912643526751  
AGGCAGAT 0.252226403033  
AGGCAGCA -0.162380285942  
AGGCAGCC -0.0962359396433  
AGGCAGCG -0.246432274949  
AGGCAGGA 0.0245194877635  
AGGCAGGC -0.193650627099  
AGGCAGGG -0.20721865713  
AGGCAGTA 0.0822727544544  
AGGCAGTC -0.193608929718  
AGGCAGTG -0.225857518341  
AGGCATAA -0.169371875703  
AGGCATAC -0.0516895749261

AGGCATAG -0.175106874544  
AGGCATAT 0.0171989277645  
AGGCATCA 0.0495968503479  
AGGCATCC -0.0795222573423  
AGGCATCG 0.051424015895  
AGGCATGA -0.284832669279  
AGGCATGC -0.310611121115  
AGGCATGG -0.0672146482179  
AGGCATTA -0.113637948265  
AGGCATTC -0.152914965538  
AGGCATTG -0.121871587623  
AGGCCAAA -0.18024564757  
AGGCCAAC -0.379055440352  
AGGCCAAG -0.145240467428  
AGGCCAAT -0.111380644711  
AGGCCACA -0.105681144748  
AGGCCACC -0.136284676834  
AGGCCACG -0.285964494429  
AGGCCACT -0.152590234039  
AGGCCAGA -0.0487418018166  
AGGCCAGC -0.16179375167  
AGGCCAGG -0.198465507876  
AGGCCATA -0.156870008338  
AGGCCATC -0.194133331784  
AGGCCATG -0.318118982967  
AGGCCCAA -0.316896845379  
AGGCCCAC -0.232361800579  
AGGCCCAG -0.226985159774  
AGGCCCAT -0.19215660456  
AGGCCCCA -0.339692594561  
AGGCCCCC -0.406796188407  
AGGCCCCG -0.366346854682  
AGGCCCCCT -0.407726885986  
AGGCCCGA -0.140961898333  
AGGCCCGC -0.126848856734  
AGGCCCGG -0.321823153269  
AGGCCCTA -0.382419736594  
AGGCCCTC -0.273308641975  
AGGCCCTG -0.35360477442  
AGGCCGAA -0.107374301063  
AGGCCGAC -0.245737786777  
AGGCCGAG -0.141937545389  
AGGCCGAT -0.000581791038223  
AGGCCGCA -0.293434069099  
AGGCCGCC -0.309593565519  
AGGCCCGC -0.0839191540036  
AGGCCGGA -0.171657064472  
AGGCCGGC -0.19168627451  
AGGCCGGG -0.418382280348  
AGGCCGTA -0.230235148243  
AGGCCGTC -0.130832824219  
AGGCCGTG -0.180142548192  
AGGCCTAA -0.115145028951  
AGGCCTAC -0.146980078604

AGGCCTAG -0.0763289200672  
AGGCCTAT -0.233905133203  
AGGCCTCA -0.276037763253  
AGGCCTCC -0.191893004115  
AGGCCTCG -0.166393762183  
AGGCCTGA -0.263770010735  
AGGCCTGC -0.41843352457  
AGGCCTGG -0.375230384413  
AGGCCTTA -0.128428838736  
AGGCCTTC -0.250109728532  
AGGCCTTG -0.1909735941  
AGGCGAAA -0.0535771604938  
AGGCGAAC -0.249629556456  
AGGCGAAG -0.15523271182  
AGGCGAAT 0.230347362457  
AGGCGACA -0.124290018274  
AGGCGACC -0.293644200718  
AGGCGACG -0.130804014861  
AGGCGACT -0.142135076253  
AGGCGAGA -0.0154054742666  
AGGCGAGC -0.168148970036  
AGGCGAGG -0.263570723278  
AGGCGATA 0.119763880656  
AGGCGATC 0.319458689873  
AGGCGATG -0.184056270279  
AGGCGCAA -0.131134270693  
AGGCGCAC -0.193972565158  
AGGCGCAG -0.127183235386  
AGGCGCAT -0.101980671681  
AGGCGCCA -0.213128021113  
AGGCGCCC -0.347482471733  
AGGCGCCG -0.0835342929032  
AGGCGCCT -0.23694037387  
AGGCGCGA 0.0503029704275  
AGGCGCGC -0.0299814485499  
AGGCGCGG -0.0303677015385  
AGGCGCTA -0.342347977329  
AGGCGCTC -0.31969200722  
AGGCGCTG -0.262380583952  
AGGCGGAA -0.0801901018105  
AGGCGGAC -0.104285469435  
AGGCGGAG -0.290536478256  
AGGCGGAT 0.245845742594  
AGGCGGCA -0.0888511560484  
AGGCGGCC -0.243626531288  
AGGCGGCG -0.17645315732  
AGGCGGGA -0.168726521576  
AGGCGGGC -0.177541242715  
AGGCGGGG -0.129995786905  
AGGCGGTA -0.074695046669  
AGGCGGTC -0.399881516588  
AGGCGGTG -0.106889783221  
AGGCGTAA -0.144518518519  
AGGCGTAC -0.186833267483

AGGCGTAG -0.346406519555  
AGGCGTAT 0.0694042101899  
AGGCGTCA -0.241036107956  
AGGCGTCC -0.191375402666  
AGGCGTCG -0.12667373724  
AGGCGTGA 0.0268345125158  
AGGCGTGC -0.0841935430763  
AGGCGTGG -0.259396574509  
AGGCGTTA -0.165870859746  
AGGCGTTC -0.174663923182  
AGGCGTTG -0.212089744297  
AGGCTAAA 0.019605421818  
AGGCTAAC -0.108444079005  
AGGCTAAG -0.114955112165  
AGGCTAAT -0.202437352404  
AGGCTACA -0.251808374068  
AGGCTACC -0.309185857723  
AGGCTACG -0.068463777885  
AGGCTACT -0.320919571296  
AGGCTAGA 0.0984890967995  
AGGCTAGC -0.236646254136  
AGGCTAGG -0.160909222948  
AGGCTATA -0.108087835836  
AGGCTATC 0.00836461832312  
AGGCTATG -0.209493941788  
AGGCTCAA -0.254103285921  
AGGCTCAC -0.174384894699  
AGGCTCAG -0.160551018452  
AGGCTCAT -0.205110057717  
AGGCTCCA -0.0495382031906  
AGGCTCCC -0.381082860199  
AGGCTCCG -0.225670441328  
AGGCTCGA -0.210068057641  
AGGCTCGC -0.313005603209  
AGGCTCGG -0.153234262941  
AGGCTCTA -0.129703442025  
AGGCTCTC -0.334016292274  
AGGCTCTG -0.115870996599  
AGGCTGAA -0.344825783365  
AGGCTGAC -0.142647462277  
AGGCTGAG -0.144257936064  
AGGCTGAT 0.08145947438  
AGGCTGCA -0.288798173691  
AGGCTGCC -0.258983095485  
AGGCTGCG -0.209343671292  
AGGCTGGA -0.0405419539278  
AGGCTGGC -0.273249887464  
AGGCTGGG -0.0991420701159  
AGGCTGTA -0.0564482152456  
AGGCTGTC -0.186328728608  
AGGCTGTG -0.341914487614  
AGGCTTAA -0.129197945476  
AGGCTTAC -0.317313614357  
AGGCTTAG -0.0883901674157

AGGCTTAT -0.0596108257606  
AGGCTTCA -0.239587790615  
AGGCTTCC -0.373121108633  
AGGCTTCG -0.100302701949  
AGGCTTGA -0.131838134431  
AGGCTTGC -0.143371742112  
AGGCTTGG -0.314289490425  
AGGCTTTA -0.138338711625  
AGGCTTTC -0.119230283773  
AGGCTTTG -0.179178808383  
AGGGAAAA 0.0588729218844  
AGGGAAAC -0.114306133358  
AGGGAAAG 0.00865783046568  
AGGGAAAT 0.299145758575  
AGGGAAACA -0.124106177596  
AGGGAAACC -0.23671888389  
AGGGAAACG -0.292398136422  
AGGGAAACT -0.137989385097  
AGGGAAGA -0.161144517066  
AGGGAAGC -0.00269175680348  
AGGGAAGG -0.305179772445  
AGGGAATA 0.209508520622  
AGGGAATC 0.485567460617  
AGGGAATG 0.0516888405893  
AGGGACAA 0.109307440909  
AGGGACAC -0.295118323859  
AGGGACAG -0.248330659097  
AGGGACAT -0.172571873475  
AGGGACCA -0.278358595833  
AGGGACCC -0.390117545101  
AGGGACCG -0.226566720299  
AGGGACCT -0.26353231663  
AGGGACGA -0.222236283273  
AGGGACGC -0.205512670565  
AGGGACGG -0.280234527271  
AGGGACTA -0.234373366174  
AGGGACTC -0.185855282267  
AGGGACTG -0.156168482208  
AGGGAGAA -0.264854015871  
AGGGAGAC -0.270578360701  
AGGGAGAG -0.255357760111  
AGGGAGAT 0.286157398139  
AGGGAGCA -0.180849736569  
AGGGAGCC -0.258862158402  
AGGGAGCG -0.2510307115  
AGGGAGGA -0.177412363724  
AGGGAGGC -0.313397882109  
AGGGAGGG 6.39196704069E-5  
AGGGAGTA -0.0957898101201  
AGGGAGTC -0.20828087197  
AGGGAGTG -0.217184627048  
AGGGATAA 0.0181452940789  
AGGGATAC 0.252590616699  
AGGGATAG -0.00376273008586



AGGGATAT 0.349601208723  
AGGGATCA 0.106848266324  
AGGGATCC 0.123498181308  
AGGGATCG 0.109854222925  
AGGGATGA 0.0218386082778  
AGGGATGC -0.268545033628  
AGGGATGG -0.344409397591  
AGGGATTA 0.137255386225  
AGGGATTC 0.351100489591  
AGGGATTG 0.216627199163  
AGGGCAAA 0.088239652277  
AGGGCAAC -0.183438413968  
AGGGCAAG -0.226193173566  
AGGGCAAT 0.147522448352  
AGGGCACA -0.251513285543  
AGGGCACC -0.37661269089  
AGGGCACG -0.211204389575  
AGGGCACT -0.18939256772  
AGGGCAGA -0.0975156180552  
AGGGCAGC -0.256046905454  
AGGGCAGG -0.157738691861  
AGGGCATA -0.0291607670102  
AGGGCATC -0.118180180651  
AGGGCATG -0.256661935325  
AGGGCCAA -0.311312991672  
AGGGCCAC -0.235483632055  
AGGGCCAG -0.116297386097  
AGGGCCAT -0.26261479214  
AGGGCCCA -0.241212489144  
AGGGCCCC -0.138465382202  
AGGGCCCCG -0.197998452751  
AGGGCCCT -0.413600911873  
AGGGCCGA -0.191230210603  
AGGGCCGC -0.344184413504  
AGGGCCGG -0.229397142105  
AGGGCCTA -0.246988093474  
AGGGCCTC -0.23524005487  
AGGGCCTG -0.233676268861  
AGGGCGAA -0.252366372002  
AGGGCGAC -0.224566448802  
AGGGCGAG -0.193340381778  
AGGGCGAT 0.192661949937  
AGGGCGCA -0.23955829904  
AGGGCGCC -0.260202729045  
AGGGCGCG 0.0531670973344  
AGGGCGGA 0.154052561998  
AGGGCGGC -0.195107674163  
AGGGCGGG -0.0488540305011  
AGGGCGTA -0.0598423301067  
AGGGCGTC -0.223708897008  
AGGGCGTG -0.264201615204  
AGGGCTAA -0.201643347051  
AGGGCTAC -0.252651285194  
AGGGCTAG -0.224866941015

AGGGCTAT -0.136409783617  
AGGGCTCA -0.311135422243  
AGGGCTCC -0.253101049502  
AGGGCTCG -0.246003165522  
AGGGCTGA -0.272472342514  
AGGGCTGC -0.222169934641  
AGGGCTGG -0.351254690432  
AGGGCTTA -0.256863858575  
AGGGCTTC -0.224989615618  
AGGGCTTG -0.366115362462  
AGGGGAAA -0.0133788828919  
AGGGGAAC -0.0706242591861  
AGGGGAAG -0.119699245063  
AGGGGAAT 0.285389086478  
AGGGGACA -0.189283950617  
AGGGGACC -0.280048136263  
AGGGGACG -0.2705327551  
AGGGGACT -0.331119888093  
AGGGGAGA -0.0407528156491  
AGGGGAGC -0.196243992363  
AGGGGAGG -0.0726527386773  
AGGGGATA 0.104999560912  
AGGGGATC 0.351280635742  
AGGGGATG -0.383155977904  
AGGGGCAA -0.0869106753813  
AGGGGCAC -0.213261560242  
AGGGGCAG -0.185251946598  
AGGGGCAT -0.108639633254  
AGGGGCCA -0.245848970421  
AGGGGCCC -0.348763146201  
AGGGGCCG -0.299145472924  
AGGGGCGA -0.18203490637  
AGGGGCGC -0.19019869294  
AGGGGCGG -0.280603490841  
AGGGGCTA -0.144240964695  
AGGGGCTC -0.328958069501  
AGGGGCTG -0.226987419003  
AGGGGGAA 0.11463251638  
AGGGGGAC -0.350309403904  
AGGGGGAG -0.153520539452  
AGGGGGAT 0.112653814304  
AGGGGGCA -0.0818158868144  
AGGGGGCC -0.162408891652  
AGGGGGCG -0.367176334239  
AGGGGGGA -0.226754537586  
AGGGGGGC -0.281953495261  
AGGGGGGG -0.289764436106  
AGGGGGTA -0.25308009481  
AGGGGGTC -0.290211789411  
AGGGGGTG -0.102909950707  
AGGGGTAA 0.140538695103  
AGGGGTAC -0.224488340192  
AGGGGTAG -0.127373203851  
AGGGGTAT -0.063600643168

AGGGGTCA -0.333624232216  
AGGGGTCC -0.337202818325  
AGGGGTCCG -0.198027434842  
AGGGGTGA -0.181002787655  
AGGGGTGC -0.335618317177  
AGGGGTGG -0.224031953522  
AGGGGTTA -0.0296827753323  
AGGGGTTC -0.191681482945  
AGGGGTTG -0.0835548621582  
AGGGTAAA 0.0527481393664  
AGGGTAAC 0.014673033122  
AGGGTAAG -0.217629049546  
AGGGTAAT 0.215449296362  
AGGGTACA -0.0693606264437  
AGGGTACC -0.250805093347  
AGGGTACG -0.246512708787  
AGGGTACT -0.0981564708723  
AGGGTAGA 0.0252544913659  
AGGGTAGC -0.265600404277  
AGGGTAGG -0.161418122157  
AGGGTATA -0.00920300116358  
AGGGTATC 0.348784739878  
AGGGTATG -0.00930512980692  
AGGGTCAA -0.0685814481873  
AGGGTCAC -0.000423756353096  
AGGGTCAG -0.116265432099  
AGGGTCAT -0.204293552812  
AGGGTCCA -0.313204628121  
AGGGTCCC -0.100808173534  
AGGGTCCG -0.223100093823  
AGGGTCGA -0.156968928832  
AGGGTCGC -0.303445013878  
AGGGTCGG -0.143067341016  
AGGGTCTA -0.310694711895  
AGGGTCTC -0.188527828535  
AGGGTCTG -0.183376403909  
AGGGTGAA -0.28126405758  
AGGGTGAC -0.213833061742  
AGGGTGAG -0.233079324325  
AGGGTGAT -0.0811866977355  
AGGGTGCA -0.206258332922  
AGGGTGCC -0.234617350792  
AGGGTGCG -0.144728891161  
AGGGTGGA 0.00458478363192  
AGGGTGGC -0.17257481112  
AGGGTGGG -0.0152622740294  
AGGGTGTA 0.0527446672993  
AGGGTGTC -0.208081444835  
AGGGTGTTG -0.331685871722  
AGGGTTAA -0.139973990485  
AGGGTTAC -0.209430528656  
AGGGTTAG -0.170708018503  
AGGGTTAT -0.133670865234  
AGGGTTCA -0.233543696765

AGGGTTCC -0.11900805559  
AGGGTTCG -0.293194334738  
AGGGTTGA -0.108616668039  
AGGGTTGC -0.0625375835553  
AGGGTTGG -0.0475117591858  
AGGGTTTA -0.0429155808123  
AGGGTTTC -0.157720733493  
AGGGTTTG -0.189391077976  
AGGTAAAA 0.086552394125  
AGGTAAAC -0.043137061206  
AGGTAAAG -0.0747797810159  
AGGTAAAT 0.256918919704  
AGGTAACA -0.164122847025  
AGGTAACC -0.182319790158  
AGGTAACG -0.204911870583  
AGGTAACT 0.110340970174  
AGGTAAGA 0.00277678833749  
AGGTAAGC -0.118185938013  
AGGTAAGG -0.13535396379  
AGGTAATA 0.11836154471  
AGGTAATC 0.416729785506  
AGGTAATG 0.017157710165  
AGGTACAA -0.0610864197531  
AGGTACAC -0.245410811863  
AGGTACAG -0.220612199252  
AGGTACAT -0.0987966850526  
AGGTACCA -0.0377468251616  
AGGTACCC -0.104666837102  
AGGTACCG -0.163588477366  
AGGTACCT -0.163740051979  
AGGTACGA -0.00827364781428  
AGGTACGC -0.201770557284  
AGGTACGG -0.0599869390801  
AGGTACTA -0.24208426621  
AGGTACTC -0.21775308642  
AGGTACTG -0.104864335342  
AGGTAGAA 0.142049664131  
AGGTAGAC -0.220540305011  
AGGTAGAG -0.175375453885  
AGGTAGAT 0.280106314079  
AGGTAGCA -0.172032748497  
AGGTAGCC -0.335113590853  
AGGTAGCG -0.0770068794013  
AGGTAGGA -0.103257096211  
AGGTAGGC -0.2435764489  
AGGTAGGG 0.00485740630969  
AGGTAGTA -0.0213447259676  
AGGTAGTC -0.0998460040969  
AGGTAGTG -0.0776658270361  
AGGTATAA -0.00790593013364  
AGGTATAC -0.122120134361  
AGGTATAG -0.159702672001  
AGGTATAT 0.102155942644  
AGGTATCA 0.10407626288

AGGTATCC 0.21736756021  
AGGTATCG 0.0739625531074  
AGGTATGA 0.122192583811  
AGGTATGC -0.0861725339121  
AGGTATGG -0.153496641644  
AGGTATTA -0.0164092804324  
AGGTATTG -0.167007571576  
AGGTATTG 0.0636018353861  
AGGTCAAA 0.0189807214563  
AGGTCAAC -0.317062145149  
AGGTCAAG -0.178049460685  
AGGTCAAT -0.0321082789962  
AGGTCACA -0.138122132836  
AGGTCACC -0.402736153703  
AGGTCACG -0.268009336393  
AGGTCACT -0.144469686992  
AGGTCAGA -0.156227709191  
AGGTCAGC -0.249970951344  
AGGTCAGG -0.259927688898  
AGGTCATA -0.0184307010033  
AGGTCATC -0.199340090869  
AGGTCATG -0.0870645754474  
AGGTCCAA -0.236765650104  
AGGTCCAC -0.203429012346  
AGGTCCAG -0.242205761317  
AGGTCCAT -0.17009958863  
AGGTCCCA -0.30115600158  
AGGTCCCC -0.282548971205  
AGGTCCCG -0.302322845282  
AGGTCCGA -0.128666302554  
AGGTCCGC -0.332419888412  
AGGTCCGG -0.330872186915  
AGGTCCTA -0.0980372789179  
AGGTCCTC -0.150785811493  
AGGTCCTG -0.326303010589  
AGGTCGAA -0.165258981198  
AGGTCGAC -0.128493370038  
AGGTCGAG -0.0357811256552  
AGGTCGAT -0.0931595277384  
AGGTCGCA -0.295435185185  
AGGTCGCC -0.317801299573  
AGGTCGCG -0.132958554881  
AGGTCGGA -0.0369880284575  
AGGTCGGC -0.286138769156  
AGGTCGGG -0.315399090395  
AGGTCGTA 0.0243684935491  
AGGTCGTC -0.237757200451  
AGGTCGTG -0.116245253473  
AGGTCTAA -0.0307416189159  
AGGTCTAC -0.200566601689  
AGGTCTAG -0.0536072969146  
AGGTCTAT 0.0104600018593  
AGGTCTCA -0.274348591839  
AGGTCTCC -0.174929633105



AGGTGTGA 0.00640826347827  
AGGTGTGC -0.262937081217  
AGGTGTGG 0.00324924806253  
AGGTGTTA -0.0266311217003  
AGGTGTTC -0.0652405096393  
AGGTGTTG 0.0250499462118  
AGGTTAAA 0.0287712134185  
AGGTTAAC -0.0397830676276  
AGGTTAAG -0.112222441744  
AGGTTAAT 0.0678745619235  
AGGTTACA 0.0642028365057  
AGGTTACC -0.15656523649  
AGGTTACG -0.151977732711  
AGGTTACT -0.075200039514  
AGGTTAGA 0.0637749431987  
AGGTTAGC -0.23338580939  
AGGTTAGG -0.128628710066  
AGGTTATA -0.0934999506075  
AGGTTATC 0.0665470957226  
AGGTTATG -0.283314144331  
AGGTTCAA -0.087187623469  
AGGTTCAC -0.116436476973  
AGGTTCAG -0.0801000633386  
AGGTTCAT -0.241753900849  
AGGTTCCA -0.158766010231  
AGGTTCCC -0.134738071444  
AGGTTCCG -0.280742898522  
AGGTTCGA -0.0135322746701  
AGGTTCGC -0.3203296854  
AGGTTCGG -0.140623415788  
AGGTTCTA -0.231915016216  
AGGTTCTC -0.290469135802  
AGGTTCTG -0.160828929824  
AGGTTGAA -0.175019536186  
AGGTTGAC -0.141996038213  
AGGTTGAG -0.068057016346  
AGGTTGAT -0.0480145989408  
AGGTTGCA -0.18042072843  
AGGTTGCC -0.239548025536  
AGGTTGCG -0.213085499346  
AGGTTGGA -0.121718811734  
AGGTTGGC -0.263680566044  
AGGTTGGG -0.224886276963  
AGGTTGTA 0.0488704545785  
AGGTTGTC -0.287615105301  
AGGTTGTG -0.120084241104  
AGGTTTAA -0.145746900775  
AGGTTTAC -0.0843679334343  
AGGTTTAG -0.0392239187599  
AGGTTTAT -0.105718566818  
AGGTTTCA -0.200924142397  
AGGTTTCC -0.302148544736  
AGGTTTCG -0.0869456654758  
AGGTTTGA -0.0907594977154

AGGTTTGC 0.0583920503247  
AGGTTTGG -0.16831308242  
AGGTTTTA -0.16522875817  
AGGTTTTTC -0.167593456111  
AGGTTTTTG -0.202580648701  
AGTAAAAA 0.130960613844  
AGTAAAAC 0.0779801724833  
AGTAAAAG 0.14028573624  
AGTAAAAT 0.282942545391  
AGTAAACA -0.131581546972  
AGTAAACC -0.109535872824  
AGTAAACG 0.133989510845  
AGTAAACT -0.14473445937  
AGTAAAGA -0.00605378234277  
AGTAAAGC -0.0696588310832  
AGTAAAGG -0.0674138229048  
AGTAAATA 0.146399256171  
AGTAAATC 0.287958115183  
AGTAAATG 0.145609009187  
AGTAACAA -0.166837603361  
AGTAACAC -0.161156832727  
AGTAACAG 0.038632309761  
AGTAACAT -0.0186035917364  
AGTAACCA 0.0505624567816  
AGTAACCC -0.29226897395  
AGTAACCG -0.290334619998  
AGTAACGA 0.0994886173783  
AGTAACGC -0.225577342048  
AGTAACGG -0.1432599613  
AGTAACTA 0.0323812706115  
AGTAACTC -0.10195855714  
AGTAACTG -0.0565440994872  
AGTAAGAA 0.19862130083  
AGTAAGAC -0.116752183438  
AGTAAGAG 0.0643562297038  
AGTAAGAT 0.259153313091  
AGTAAGCA 0.0329262570384  
AGTAAGCC -0.299479193738  
AGTAAGCG -0.0348724502395  
AGTAAGGA 0.0854314064475  
AGTAAGGC -0.0317593598736  
AGTAAGGG -0.176290809328  
AGTAAGTA 0.213372946116  
AGTAAGTC -0.145392873609  
AGTAAGTG 0.0113339480559  
AGTAATAA 0.00642569697674  
AGTAATAC -0.127041966424  
AGTAATAG -0.0272245134841  
AGTAATAT 0.281017825752  
AGTAATCA 0.326546685987  
AGTAATCC 0.376297706042  
AGTAATCG 0.289045862697  
AGTAATGA 0.0320122615606  
AGTAATGC 0.0405113174823



AGTAATGG -0.0373759679224  
AGTAATTA 0.149909987047  
AGTAATTC -0.0357334957957  
AGTAATTG 0.125978818299  
AGTACAAA 0.159186727296  
AGTACAAC -0.0775355743506  
AGTACAAG -0.0643149200077  
AGTACAAT 0.155511097938  
AGTACACA 0.0563794632063  
AGTACACC -0.0889558075416  
AGTACACG -0.151624496294  
AGTACACT -0.110099806779  
AGTACAGA 0.0128268458144  
AGTACAGC -0.0474321909549  
AGTACAGG 0.0531895189173  
AGTACATA -0.0559863676776  
AGTACATC 0.0450829793539  
AGTACATG -0.0557395576396  
AGTACCAA -0.188870780999  
AGTACCAC -0.0959518635585  
AGTACCAG -0.145385372996  
AGTACCAT 0.0334505251841  
AGTACCCA -0.0475338863626  
AGTACCCC -0.303189083821  
AGTACCCG -0.286130758813  
AGTACCGA -0.147817105802  
AGTACCGC -0.292477769418  
AGTACCGG -0.252147094494  
AGTACCTA -0.0725701991262  
AGTACCTC -0.119502757883  
AGTACCTG -0.299986832576  
AGTACGAA 0.206604426003  
AGTACGAC -0.0435735765398  
AGTACGAG -0.0486618806121  
AGTACGAT 0.203442995455  
AGTACGCA -0.0970802399021  
AGTACGCC -0.189148248307  
AGTACGCG -0.226422796115  
AGTACGGA -0.125883489179  
AGTACGGC -0.147924601757  
AGTACGGG 0.0559777919169  
AGTACGTA -0.0796395091001  
AGTACGTC -0.18904658303  
AGTACGTG 0.152367323813  
AGTACTAA -0.132061751567  
AGTACTAC 0.0246081143384  
AGTACTAG -0.0531163571711  
AGTACTAT 0.0509584859744  
AGTACTCA -0.137322323246  
AGTACTCC -0.153211781862  
AGTACTCG -0.137531900881  
AGTACTGA 0.0918091613034  
AGTACTGC 0.0553140573887  
AGTACTGG -0.101654907792

AGTACTTA 0.0771449428088  
AGTACTTC 0.00496467914835  
AGTACTTG -0.0313468830358  
AGTAGAAA 0.21647320326  
AGTAGAAC -0.181285192137  
AGTAGAAG -0.0713027444395  
AGTAGAAT 0.307612627664  
AGTAGACA -0.134632716049  
AGTAGACC -0.226589095049  
AGTAGACG -0.259410835241  
AGTAGACT -0.125804483315  
AGTAGAGA -0.0603514274425  
AGTAGAGC -0.186763085113  
AGTAGAGG -0.210096021948  
AGTAGATA 0.302844189774  
AGTAGATC 0.200980634289  
AGTAGATG 0.0952388597965  
AGTAGCAA 0.0204916683132  
AGTAGCAC -0.0397265846324  
AGTAGCAG -0.165168428332  
AGTAGCAT -0.0819708570017  
AGTAGCCA -0.192696975289  
AGTAGCCC -0.215711934156  
AGTAGCCG -0.214254357083  
AGTAGCGA 0.0168930600148  
AGTAGCGC -0.271348326029  
AGTAGCGG -0.192927297668  
AGTAGCTA -0.100609997036  
AGTAGCTC -0.183200374184  
AGTAGCTG -0.177475308642  
AGTAGGAA 0.0168060769721  
AGTAGGAC -0.233038712226  
AGTAGGAG 0.133581942112  
AGTAGGAT 0.223658710212  
AGTAGGCA -0.241658219623  
AGTAGGCC -0.146600823045  
AGTAGGCG -0.168902495899  
AGTAGGGA -0.0876413255361  
AGTAGGGC -0.260389678289  
AGTAGGGG -0.122620252852  
AGTAGGTA 0.108568564497  
AGTAGGTC -0.0844787463066  
AGTAGGTG -0.0908931256654  
AGTAGTAA 0.238917563963  
AGTAGTAC 0.00256973436878  
AGTAGTAG -0.15595283169  
AGTAGTAT 0.179563581422  
AGTAGTCA -0.0418825272762  
AGTAGTCC -0.15792463081  
AGTAGTCG -0.189637385311  
AGTAGTGA -0.00554896924192  
AGTAGTGC -0.0346029171313  
AGTAGTGG -0.0092818851423  
AGTAGTTA 0.184491450322

AGTAGTTC -0.0448562456243  
AGTAGTTG -0.132518946565  
AGTATAAA 0.111651737689  
AGTATAAC 0.0870730608865  
AGTATAAG 0.0149506777273  
AGTATAAT 0.273951447707  
AGTATACA 0.132357461196  
AGTATACC -0.1501652067  
AGTATACG -0.056631662147  
AGTATACT 0.171410231088  
AGTATAGA 0.150368282655  
AGTATAGC -0.149684726955  
AGTATAGG 0.129788798876  
AGTATATA 0.21610719235  
AGTATATC 0.194257832225  
AGTATATG 0.0630816614124  
AGTATCAA 0.118857234175  
AGTATCAC 0.14174570243  
AGTATCAG 0.206815736899  
AGTATCAT 0.0972331994116  
AGTATCCA 0.270743683989  
AGTATCCC 0.150208475586  
AGTATCCG 0.356771090586  
AGTATCGA 0.0712949471501  
AGTATCGC 0.153590574288  
AGTATCGG 0.172317174911  
AGTATCTA 0.288174276873  
AGTATCTC 0.282651649872  
AGTATCTG 0.309891545369  
AGTATGAA -0.0760237316304  
AGTATGAC -0.128530189777  
AGTATGAG -0.0485373286965  
AGTATGAT 0.175954847239  
AGTATGCA 0.031576317181  
AGTATGCC -0.130706527265  
AGTATGCG -0.0230199792552  
AGTATGGA -0.097876672484  
AGTATGGC -0.223575093988  
AGTATGGG -0.106762367119  
AGTATGTA -0.116297721335  
AGTATGTC -0.222967928962  
AGTATGTG 0.180130189466  
AGTATTAA 0.0134688303575  
AGTATTAC -0.149615610346  
AGTATTAG 0.0390495837752  
AGTATTAT 0.100537677742  
AGTATTCA 0.0865645838479  
AGTATTCC -0.0843784773136  
AGTATTCCG 0.0397603330066  
AGTATTGA 0.0874188252728  
AGTATTGC 0.149615071617  
AGTATTGG -0.199919878391  
AGTATTTA 0.0236997519155  
AGTATTTTC 0.0563930091671

AGTATTTG 0.169696370941  
AGTCAAAA 0.047286911801  
AGTCAAAC -0.0750894640936  
AGTCAAAG 0.0452968340989  
AGTCAAAT 0.0756802696381  
AGTCAACA -0.266141178213  
AGTCAACC -0.170711161599  
AGTCAACG -0.125279118674  
AGTCAACT -0.181013054143  
AGTCAAGA -0.0956056662096  
AGTCAAGC -0.228776242869  
AGTCAAGG -0.241655145171  
AGTCAATA 0.122840237985  
AGTCAATC -0.0256461290369  
AGTCAATG -0.332030694073  
AGTCACAA 0.0267541548662  
AGTCACAC -0.11520782183  
AGTCACAG -0.188863128597  
AGTCACAT -0.00144949391213  
AGTCACCA -0.194062454611  
AGTCACCC -0.188296903461  
AGTCACCG -0.005383779512  
AGTCACGA -0.016633186239  
AGTCACGC -0.305436274408  
AGTCACGG -0.100750528251  
AGTCACTA -0.160412490922  
AGTCACTC -0.158501089325  
AGTCACTG -0.286173382053  
AGTCAGAA 0.00838341428611  
AGTCAGAC -0.218923091719  
AGTCAGAG -0.106630116237  
AGTCAGAT 0.242271875409  
AGTCAGCA -0.216072663078  
AGTCAGCC -0.213844035137  
AGTCAGCG -0.0948974670378  
AGTCAGGA 0.149447212819  
AGTCAGGC -0.0182659480191  
AGTCAGGG -0.220476616274  
AGTCAGTA -0.109844115468  
AGTCAGTC -0.226242798354  
AGTCAGTG -0.151028034306  
AGTCATAA 0.0228435311423  
AGTCATAC -0.0510631407934  
AGTCATAG -0.0947086134661  
AGTCATAT 0.0231755911216  
AGTCATCA -0.102652854317  
AGTCATCC -0.0851674529946  
AGTCATCG -0.106537561925  
AGTCATGA -0.0746494587166  
AGTCATGC -0.127783813145  
AGTCATGG 0.0156087922944  
AGTCATTA -0.0377226780645  
AGTCATTC -0.191623864085  
AGTCATTG -0.169487291213

AGTCCAAA 0.046343285425  
AGTCCAAC -0.211305359387  
AGTCCAAG 0.0431987564104  
AGTCCAAT 0.0128993360743  
AGTCCACA -0.261176993387  
AGTCCACC -0.282605033719  
AGTCCACG -0.207212650021  
AGTCCACT -0.211773420479  
AGTCCAGA 0.0742798963753  
AGTCCAGC -0.144540572017  
AGTCCAGG -0.122129709252  
AGTCCATA -0.161802472866  
AGTCCATC -0.300585686778  
AGTCCATG -0.149530864198  
AGTCCCAA 0.00209938747283  
AGTCCCAC -0.218694275728  
AGTCCCAG -0.241251892817  
AGTCCCAT -0.164033560527  
AGTCCCCA -0.213704769844  
AGTCCCCC -0.26034777709  
AGTCCCCG -0.31837796085  
AGTCCCCGA -0.0982038572616  
AGTCCCCGC -0.220901929802  
AGTCCCCGG -0.296663384655  
AGTCCCTA -0.0329478662452  
AGTCCCTC -0.357222920762  
AGTCCCTG -0.121150511436  
AGTCCGAA -0.19749268664  
AGTCCGAC -0.156009921419  
AGTCCGAG -0.277541215973  
AGTCCGAT 0.00492381211103  
AGTCCGCA -0.0648715246907  
AGTCCGCC -0.240782590257  
AGTCCGCG -0.200391240171  
AGTCCGGA -0.103639625119  
AGTCCGGC -0.257568274977  
AGTCCGGG -0.363824298973  
AGTCCGTA -0.0340561098489  
AGTCCGTC -0.266694907326  
AGTCCGTG 0.0222910063778  
AGTCCTAA -0.107718118734  
AGTCCTAC -0.27263381656  
AGTCCTAG -0.136043209877  
AGTCCTAT -0.119203244537  
AGTCCTCA -0.0400367955747  
AGTCCTCC -0.333048053238  
AGTCCTCG -0.242735285404  
AGTCCTGA -0.126194621425  
AGTCCTGC -0.349575102086  
AGTCCTGG -0.284130746062  
AGTCCTTA -0.212837086976  
AGTCCTTC -0.245828738224  
AGTCCTTG -0.337929587201  
AGTCGAAA -0.149156654512

AGTCGAAC -0.17436838755  
AGTCGAAG -0.116094178077  
AGTCGAAT 0.0351706303662  
AGTCGACA 0.0683305972426  
AGTCGACC -0.168110095771  
AGTCGACG -0.158084489176  
AGTCGACT -0.24411198341  
AGTCGAGA -0.0816614124039  
AGTCGAGC -0.29868577388  
AGTCGAGG -0.232774022247  
AGTCGATA 0.0569111714827  
AGTCGATC 0.0285807679456  
AGTCGATG -0.139171495676  
AGTCGCAA 0.196514753098  
AGTCGCAC -0.141126531777  
AGTCGCAG -0.138508959491  
AGTCGCAT -0.267736106148  
AGTCGCCA -0.321506756868  
AGTCGCCC -0.339657645298  
AGTCGCCG -0.22633147265  
AGTCGCGA -0.125208932837  
AGTCGCGC -0.129899458878  
AGTCGCGG -0.0978025837751  
AGTCGCTA -0.028458296289  
AGTCGCTC -0.327056861325  
AGTCGCTG -0.204213489718  
AGTCGGAA -0.11164086802  
AGTCGGAC -0.0680805717999  
AGTCGGAG -0.0844706760398  
AGTCGGAT 0.0603814024457  
AGTCGGCA -0.071050712744  
AGTCGGCC -0.137603503054  
AGTCGGCG -0.174548307628  
AGTCGGGA -0.025088257086  
AGTCGGGC -0.285606908508  
AGTCGGGG -0.254505891649  
AGTCGGTA -0.0712198154647  
AGTCGGTC -0.254982816871  
AGTCGGTG -0.138338847464  
AGTCGTAA 0.00792788342801  
AGTCGTAC -0.133790488107  
AGTCGTAG -0.20659121017  
AGTCGTAT 0.118336846034  
AGTCGTCA -0.156064272896  
AGTCGTCC -0.240721591091  
AGTCGTCCG -0.253567725051  
AGTCGTGA -0.0786158588491  
AGTCGTGC -0.0659552229881  
AGTCGTGG -0.129319961884  
AGTCGTTA 0.0556462662857  
AGTCGTTC -0.108568717422  
AGTCGTTG -0.254829009175  
AGTCTAAA -0.0222611247512  
AGTCTAAC -0.147915885868

AGTCTAAG -0.0328833618899  
AGTCTAAT -0.174364420734  
AGTCTACA -0.0766013394738  
AGTCTACC -0.25931320113  
AGTCTACG -0.148883619838  
AGTCTAGA -0.0714683082298  
AGTCTAGC -0.107617514881  
AGTCTAGG -0.297634918284  
AGTCTATA -0.0508607789868  
AGTCTATC -0.209020382665  
AGTCTATG -0.106507317234  
AGTCTCAA -0.018150280956  
AGTCTCAC -0.228550068587  
AGTCTCAG -0.210709993909  
AGTCTCAT -0.104030608688  
AGTCTCCA -0.151114216243  
AGTCTCCC -0.314331518787  
AGTCTCCG -0.251450039355  
AGTCTCGA 0.0381711202213  
AGTCTCGC -0.284483430799  
AGTCTCGG -0.210420884982  
AGTCTCTA -0.180087791495  
AGTCTCTC -0.238408133624  
AGTCTCTG -0.109322182712  
AGTCTGAA -0.156254115633  
AGTCTGAC -0.289888162672  
AGTCTGAG -0.0244943881891  
AGTCTGAT 0.0966890880828  
AGTCTGCA -0.215085421793  
AGTCTGCC -0.280293055967  
AGTCTGCG -0.271496787536  
AGTCTGGA -0.1936944444444  
AGTCTGGC -0.331876131026  
AGTCTGGG -0.129505950323  
AGTCTGTA 0.0170397919603  
AGTCTGTC -0.247387073348  
AGTCTGTG -0.14355213118  
AGTCTTAA -0.0603930349078  
AGTCTTAC 0.00581843011346  
AGTCTTAG 0.0388529368177  
AGTCTTAT 0.0504384881583  
AGTCTTCA -0.0439177069415  
AGTCTTCC 0.134580342049  
AGTCTTCG -0.009108322905  
AGTCTTGA -0.0412839771621  
AGTCTTGC 0.0123397330348  
AGTCTTGG -0.189310094408  
AGTCTTTA -0.0776475816735  
AGTCTTTC -0.126536044565  
AGTCTTTG 0.00713721228885  
AGTGAAAA 0.117686447562  
AGTGAAAC -0.199481353421  
AGTGAAAG -0.104769039935  
AGTGAAAT 0.230071332065

AGTGAACA -0.152168375304  
AGTGAACC -0.0295693614499  
AGTGAACG 0.158326674705  
AGTGAACT -0.303896394368  
AGTGAAGA -0.0133083659227  
AGTGAAGC -0.265824034759  
AGTGAAGG -0.207518598986  
AGTGAATA 0.0998198538492  
AGTGAATC 0.1306429513  
AGTGAATG -0.0904480157224  
AGTGACAA -0.0864687656595  
AGTGACAC -0.0777227735644  
AGTGACAG -0.103793922983  
AGTGACAT -0.0409196424162  
AGTGACCA -0.242787560884  
AGTGACCC -0.246819087123  
AGTGACCG -0.258615582107  
AGTGACGA -0.000820215517802  
AGTGACGC -0.0314395612058  
AGTGACGG -0.116907508065  
AGTGACTA -0.0922861611921  
AGTGACTC -0.311317467002  
AGTGACTG -0.29783066693  
AGTGAGAA -0.0763093283745  
AGTGAGAC -0.0473175818446  
AGTGAGAG 0.0100715712749  
AGTGAGAT 0.289499222757  
AGTGAGCA -0.0428261791726  
AGTGAGCC -0.295527750428  
AGTGAGCG -0.109638344227  
AGTGAGGA -0.22957560722  
AGTGAGGC -0.186516605852  
AGTGAGGG -0.0372320723034  
AGTGAGTA -0.0472388227611  
AGTGAGTC -0.236172709344  
AGTGAGTG -0.0418202841961  
AGTGATAA 0.029119739182  
AGTGATAC 0.0952929554138  
AGTGATAG 0.0408043564161  
AGTGATAT 0.28378136422  
AGTGATCA -0.116829209317  
AGTGATCC 0.0253613818953  
AGTGATCG 0.232066016817  
AGTGATGA 0.00955564337307  
AGTGATGC 0.00341390590353  
AGTGATGG -0.0961535668536  
AGTGATTA 0.267501053274  
AGTGATTC 0.227461344662  
AGTGATTG 0.046521328679  
AGTGCAAA 0.0147471254905  
AGTGCAAC -0.117708067028  
AGTGCAAG 0.0408955191113  
AGTGCAAT 0.17131276208  
AGTGCACA -0.139688904529



AGTGCACC -0.206607511304  
AGTGCACG -0.0302543837985  
AGTGCACT -0.116627916371  
AGTGCAGA 0.177878343237  
AGTGCAGC -0.103247897015  
AGTGCAGG -0.157937545389  
AGTGCATA -0.0904578456068  
AGTGCATC -0.167030815092  
AGTGCATG -0.137455205984  
AGTGCCAA -0.0855614139082  
AGTGCCAC -0.292159960962  
AGTGCCAG -0.303835407966  
AGTGCCAT -0.102543877234  
AGTGCCCA -0.222326474623  
AGTGCCCC -0.240575311833  
AGTGCCCG -0.166164633845  
AGTGCCGA 0.0658005979099  
AGTGCCGC -0.219968046478  
AGTGCCGG -0.193647663006  
AGTGCCTA -0.360222397771  
AGTGCCTC -0.284424255392  
AGTGCCTG -0.197168455242  
AGTGCGAA 0.0652616558272  
AGTGCGAC -0.194935432219  
AGTGCGAG -0.143036869138  
AGTGCGAT 0.319175503304  
AGTGCGCA 0.232140112846  
AGTGCGCC -0.117807576431  
AGTGCGCG -0.035833103308  
AGTGCGGA 0.081979573751  
AGTGCGGC -0.257969034608  
AGTGCGGG -0.177982720152  
AGTGCGTA 0.0058532971104  
AGTGCGTC -0.213593538227  
AGTGCGTG -0.0438699461014  
AGTGCTAA 0.113955515523  
AGTGCTAC -0.0954807446487  
AGTGCTAG -0.0443763925933  
AGTGCTAT -0.00939510197809  
AGTGCTCA -0.190987672968  
AGTGCTCC -0.280621402308  
AGTGCTCG -0.000706929763904  
AGTGCTGA -0.239824031929  
AGTGCTGC -0.300392060058  
AGTGCTGG 0.0212703209217  
AGTGCTTA 0.0587471733737  
AGTGCTTC -0.248228993476  
AGTGCTTG -0.198949974142  
AGTGGA 0.117305652812  
AGTGGAAC -0.206150891632  
AGTGGAAG -0.152688773056  
AGTGGAAT 0.206546795758  
AGTGGACA 0.00436617708402  
AGTGGACC -0.0872020281839

AGTGGACG -0.193952658837  
AGTGGAGA 0.0818340659883  
AGTGGAGC -0.00724184297906  
AGTGGAGG -0.0641147616411  
AGTGGATA 0.310218116753  
AGTGGATC 0.199813060785  
AGTGGATG 0.105529210301  
AGTGGCAA -0.188542626981  
AGTGGCAC -0.433641061085  
AGTGGCAG -0.0775176569368  
AGTGGCAT -0.142930397822  
AGTGGCCA -0.134020335709  
AGTGGCCC -0.328093795949  
AGTGGCCG -0.159769547325  
AGTGGCGA 0.0391556345913  
AGTGGCGC -0.211581297869  
AGTGGCGG -0.0989398129856  
AGTGGCTA -0.284142338417  
AGTGGCTC -0.221511589622  
AGTGGCTG -0.0904173870091  
AGTGGGAA -0.086532790624  
AGTGGGAC -0.198295763172  
AGTGGGAG 0.0555775099344  
AGTGGGAT 0.0413044194165  
AGTGGGCA 0.0331522186548  
AGTGGGCC -0.205021620791  
AGTGGGCG -0.097541417041  
AGTGGGGA -0.110551329755  
AGTGGGGC -0.320400359874  
AGTGGGGG -0.19929557008  
AGTGGGTA -0.105376379491  
AGTGGGTC -0.416322767073  
AGTGGGTG -0.153050754458  
AGTGGTAA 0.10390800924  
AGTGGTAC -0.0686302350849  
AGTGGTAG -0.065561879599  
AGTGGTAT 0.151085918461  
AGTGGTCA -0.266573526507  
AGTGGTCC -0.248660196882  
AGTGGTCG -0.197626571861  
AGTGGTGA -0.00586181913983  
AGTGGTGC -0.200649592907  
AGTGGTGG -0.0304781663703  
AGTGGTTA -0.0872823772201  
AGTGGTTC -0.0765013828526  
AGTGGTTG -0.0577043403807  
AGTGTAAG 0.0740960284529  
AGTGTAAC -0.0133454774709  
AGTGTAAG 0.00487411561315  
AGTGTAAT 0.352410907559  
AGTGTAACA 0.0424570243035  
AGTGTAACC -0.0104150625427  
AGTGTAACG -0.177413263691  
AGTGTAGA 0.0187493281503

AGTGTAGC -0.135989645525  
AGTGTAGG -0.143884256275  
AGTGTATA 0.0754945829228  
AGTGTATC 0.145173100112  
AGTGTATG 0.010612642192  
AGTGTCAA 0.0887582732392  
AGTGTCCAC -0.23252391785  
AGTGTCCAG 0.0375639421283  
AGTGTCCAT -0.127480844804  
AGTGTCCA -0.0823167878202  
AGTGTCCC -0.26028892949  
AGTGTCCG -0.0196262442545  
AGTGTCCGA 0.0510670753854  
AGTGTCCG -0.0132741562913  
AGTGTCCG -0.00747106862151  
AGTGTCTA -0.0647637006003  
AGTGTCTC -0.0343037168763  
AGTGTCTG -0.0779684849048  
AGTGTGAA -0.0244794582195  
AGTGTGAC -0.112631301656  
AGTGTGAG -0.123150960636  
AGTGTGAT 0.0884761465674  
AGTGTGCA -0.0472067030991  
AGTGTGCC -0.255206502572  
AGTGTGCG -0.0166405971296  
AGTGTGGA -0.0861403687185  
AGTGTGGC -0.166021947874  
AGTGTGGG -0.12421383191  
AGTGTGTA 0.07455871457  
AGTGTGTC -0.120225509081  
AGTGTGTG -0.0498263914111  
AGTGTTAA -0.121985689925  
AGTGTTAC -0.155956203178  
AGTGTTAG -0.110192785437  
AGTGTTAT 0.0589906004387  
AGTGTTCA -0.184869850835  
AGTGTTCC -0.211906202163  
AGTGTTCCG -0.128654681944  
AGTGTTGA -0.0632647131463  
AGTGTTGC 0.158587455268  
AGTGTTGG -0.188212342279  
AGTGTTTA -0.11862319009  
AGTGTTTC -0.0622768148998  
AGTGTTTG -0.0370727129026  
AGTTAAAA 0.151661267125  
AGTTAAAC -0.0684765369904  
AGTTAAAG -0.00434147840787  
AGTTAAAT 0.156342161463  
AGTTAACA 0.00669882178606  
AGTTAACC -0.244934414611  
AGTTAACG -0.141237543351  
AGTTAACT -0.115861842962  
AGTTAAGA 0.0889701200905  
AGTTAAGC -0.188364282892

AGTTAAGG -0.0268112678512  
AGTTAATA 0.105950459944  
AGTTAATC -0.0610523831478  
AGTTAATG -0.0644066072959  
AGTTACAA -0.0193410137579  
AGTTACAC 0.0463193526361  
AGTTACAG -0.0671349498061  
AGTTACAT 0.164989176703  
AGTTACCA 0.031094097308  
AGTTACCC -0.102410233615  
AGTTACCG -0.0587801049419  
AGTTACGA 0.0583163186898  
AGTTACGC -0.00279952929554  
AGTTACGG -0.112013362624  
AGTTACTA -0.05116586521  
AGTTACTC 0.0315676524183  
AGTTACTG 0.0199865187604  
AGTTAGAA -0.103385914071  
AGTTAGAC -0.213604087098  
AGTTAGAG -0.032257705987  
AGTTAGAT 0.212792816527  
AGTTAGCA -0.0411459619659  
AGTTAGCC -0.186390548779  
AGTTAGCG 0.00359193036759  
AGTTAGGA -0.0387774491403  
AGTTAGGC -0.119953977837  
AGTTAGGG -0.000581704834187  
AGTTAGTA 0.141035107653  
AGTTAGTC -0.184432824982  
AGTTAGTG -0.0991120769606  
AGTTATAA 0.0557788657288  
AGTTATAC 0.0623339700103  
AGTTATAG 0.00521142066785  
AGTTATAT 0.109283409076  
AGTTATCA 0.00394432902823  
AGTTATCC -0.102365035456  
AGTTATCG 0.0172606162742  
AGTTATGA -0.000502641044564  
AGTTATGC 0.102243110136  
AGTTATGG -0.0848426875169  
AGTTATTA 0.0528017084828  
AGTTATTC 0.0759100563074  
AGTTATTG 0.0301643107231  
AGTTCAAA -0.0526977126604  
AGTTCAAC -0.119109947644  
AGTTCAAG -0.0948251565383  
AGTTCAAT 0.0837694129269  
AGTTCACA 0.0390787942655  
AGTTCACC -0.312521058196  
AGTTCACG -0.11109739098  
AGTTCAGA 0.126562840498  
AGTTCAGC 0.0216909262552  
AGTTCAGG -0.102672423311  
AGTTCATA 0.0324655325207

AGTTCATC -0.170911853309  
AGTTCATG -0.00996760274868  
AGTTCCAA -0.0565572240883  
AGTTCCAC -0.329098021144  
AGTTCCAG -0.120553305454  
AGTTCCAT -0.144173722042  
AGTTCCCA -0.16331138546  
AGTTCCCC -0.200491902434  
AGTTCCCG -0.154506343562  
AGTTCCGA -0.0413250353979  
AGTTCCGC -0.12167234652  
AGTTCCGG -0.00940200242895  
AGTTCCTA -0.0382119064843  
AGTTCCTC -0.290820079484  
AGTTCCTG -0.0905158388919  
AGTTCCGAA 0.0221449014281  
AGTTCCGAC -0.180768820852  
AGTTCCGAG -0.0206563261543  
AGTTCCGAT -0.00346055895848  
AGTTCCGCA -0.0654170252485  
AGTTCCGCC -0.169913658865  
AGTTCCGCG -0.0351070719045  
AGTTCCGGA -0.139182441701  
AGTTCCGGC -0.23820943826  
AGTTCCGGG -0.1067231964  
AGTTCCGTA 0.0082049613286  
AGTTCCGTC -0.0693470315124  
AGTTCCGTG -0.130390316751  
AGTTCTAA 0.00357888496868  
AGTTCTAC -0.0777947204662  
AGTTCTAG 0.0564714599102  
AGTTCTAT -0.152424466947  
AGTTCTCA -0.237899782135  
AGTTCTCC -0.231464564164  
AGTTCTCG 0.018265718631  
AGTTCTGA 0.0508335706109  
AGTTCTGC 0.0077663615008  
AGTTCTGG 0.1156904141  
AGTTCTTA -0.0475863001375  
AGTTCTTC -0.186273541611  
AGTTCTTG -0.0650723086633  
AGTTGAAA 0.181864803219  
AGTTGAAC -0.180191187367  
AGTTGAAG -0.0742494202311  
AGTTGAAT 0.0788848273288  
AGTTGACA -0.00152199286184  
AGTTGACC -0.336290486565  
AGTTGACG -0.00765002237188  
AGTTGAGA 0.127757035143  
AGTTGAGC -0.161715318289  
AGTTGAGG -0.217076046831  
AGTTGATA 0.203793238708  
AGTTGATC -0.0163807108828  
AGTTGATG 0.0115249952784

AGTTGCAA 0.153866053763  
AGTTGCAC -0.0580942640812  
AGTTGCAG -0.121372733004  
AGTTGCAT -0.0605693456087  
AGTTGCCA -0.292964206553  
AGTTGCCC -0.105290602586  
AGTTGCCG -0.18920905317  
AGTTGCGA 0.00983845469815  
AGTTGCGC -0.168524646844  
AGTTGCGG -0.000774299643793  
AGTTGCTA -0.120708787219  
AGTTGCTC -0.224054869684  
AGTTGCTG 0.19260576522  
AGTTGGAA 0.00663812738399  
AGTTGGAC -0.282375594654  
AGTTGGAG -0.223799647754  
AGTTGGAT 0.324960482118  
AGTTGGCA -0.143880586608  
AGTTGGCC -0.210871056241  
AGTTGGCG -0.0226308036921  
AGTTGGGA 0.0200625668889  
AGTTGGGC -0.288426147352  
AGTTGGGG -0.21070442992  
AGTTGGTA -0.0278747112577  
AGTTGGTC -0.325730756385  
AGTTGGTG -0.179315219002  
AGTTGTAA 0.0117538255505  
AGTTGTAC 0.00278820610771  
AGTTGTAG 0.00232990845024  
AGTTGTAT 0.139298011128  
AGTTGTCA 0.0709819418012  
AGTTGTCC -0.24751839597  
AGTTGTCCG -0.0103220838842  
AGTTGTGA -0.214175744372  
AGTTGTGC -0.128955558387  
AGTTGTGG -0.09645106561  
AGTTGTTA 0.0482021704706  
AGTTGTTC -0.337781386445  
AGTTGTTG -0.0441634099923  
AGTTTAAA 0.0574052119695  
AGTTTAAAC -0.103085700674  
AGTTTAAAG -0.0548821059666  
AGTTTAAAT -0.0757069309974  
AGTTTACA -0.0232414542581  
AGTTTACC -0.0312945825404  
AGTTTACG -0.0238644097565  
AGTTTAGA 0.157179630727  
AGTTTAGC -0.161630322665  
AGTTTAGG -0.0795304886079  
AGTTTATA 0.0843901264447  
AGTTTATC -0.101445527581  
AGTTTATG -0.0260845463128  
AGTTTCAA -0.0165414844624  
AGTTTCAC -0.13052523706

AGTTTCAG -0.00810512399576  
AGTTTCAT 0.0102814057211  
AGTTTCCA 0.044004808009  
AGTTTCCC -0.0974397266562  
AGTTTCCG -0.212294434293  
AGTTTCGA 0.0534150036225  
AGTTTCGC 0.0526186567489  
AGTTTCGG -0.272735004746  
AGTTTCTA -0.160093599393  
AGTTTCTC -0.0890625771719  
AGTTTCTG 0.0500477507739  
AGTTTGAA 0.101006608268  
AGTTTGAC -0.00234916391847  
AGTTTGAG -0.00309498121693  
AGTTTGAT 0.126573010039  
AGTTTGCA -0.0331338166287  
AGTTTGCC -0.0483590719568  
AGTTTGCG -0.0667275900678  
AGTTTGGA 0.1544128543  
AGTTTGGC -0.294263374486  
AGTTTGGG -0.0956630355846  
AGTTTGTA -0.0442847098338  
AGTTTGTC -0.259320536459  
AGTTTGTG 0.0165110650069  
AGTTTTAA -0.061676389244  
AGTTTTAC 0.088039530234  
AGTTTTAG 0.00915985065303  
AGTTTTAT -0.00319468859413  
AGTTTCA 0.0045254456438  
AGTTTCC 0.0517469818256  
AGTTTTCG 0.0386720679775  
AGTTTGA 0.0468767151858  
AGTTTGC -0.0869046685202  
AGTTTGG -0.0882001042781  
AGTTTTTA 0.0770313657693  
AGTTTTTC -0.0941601914044  
AGTTTTTG -0.0202058151356  
ATAAAAAA 0.184545763903  
ATAAAAAAC 0.0495910391818  
ATAAAAAAG 0.0901391907616  
ATAAAAAAT 0.312672873654  
ATAAAACA 0.08591518603  
ATAAAACC 0.0707814565688  
ATAAAACG 0.114911962941  
ATAAAAGA 0.179188895475  
ATAAAAGC 0.132807525961  
ATAAAAGG -0.170626585202  
ATAAAATA 0.222178313465  
ATAAAATC 0.413067859893  
ATAAAATG 0.0834979911743  
ATAAACAA 0.0180073511252  
ATAAACAC 0.122916333735  
ATAAACAG -0.024437897844  
ATAAACAT 0.0242825743357

ATAAACCA -0.117920170143  
ATAAACCC -0.0864191432727  
ATAAACCG -0.111128383188  
ATAAACGA 0.0903752560545  
ATAAACGC -0.0704763002481  
ATAAACGG -0.00295228760039  
ATAAACTA -0.058271468627  
ATAAACTC -0.0494295169416  
ATAAACTG -0.0299347696599  
ATAAAGAA 0.00970610027167  
ATAAAGAC 0.0334721947792  
ATAAAGAG -0.0418679993608  
ATAAAGAT 0.33480597969  
ATAAAGCA -0.108907875675  
ATAAAGCC -0.260207697894  
ATAAAGCG 0.150309268701  
ATAAAGGA 0.0887909270781  
ATAAAGGC -0.287343834872  
ATAAAGGG 0.0200155731561  
ATAAAGTA 0.177953888397  
ATAAAGTC -0.208160330074  
ATAAAGTG -0.0678700623248  
ATAAATAA 0.116521145381  
ATAAATAC -0.000920396134336  
ATAAATAG 0.0131040198468  
ATAAATAT 0.336283887608  
ATAAATCA 0.168688591508  
ATAAATCC 0.230961893278  
ATAAATCG 0.253500235299  
ATAAATGA 0.199774817311  
ATAAATGC 0.0179594090044  
ATAAATGG -0.0851445170661  
ATAAATTA 0.0596269231328  
ATAAATTC 0.125993346215  
ATAAATTG 0.147515000073  
ATAACAAA 0.104387430448  
ATAACAAC 0.151768773699  
ATAACAAG 0.00703293929116  
ATAACAAT 0.17214153988  
ATAACACA 0.0790536515915  
ATAACACC 0.0605770487993  
ATAACACG 0.0737044731451  
ATAACAGA 0.128521203493  
ATAACAGC -0.0596938901511  
ATAACAGG -0.0826058233725  
ATAACATA 0.0598448923138  
ATAACATC 0.112834529847  
ATAACATG 0.0221217809392  
ATAACCAA 0.0607310447024  
ATAACCAC -0.0302790812546  
ATAACCAG -0.0962287865815  
ATAACCAT 0.0602043952666  
ATAACCCA -0.0661046345694  
ATAACCCC -0.198086959385



ATAACCCG 0.0891347779315  
ATAACCGA -0.0269613896435  
ATAACCGC 0.0387853371016  
ATAACCGG -0.190666510296  
ATAACCTA -0.141321348019  
ATAACCTC -0.0828575588348  
ATAACCTG -0.0471176748219  
ATAACGAA 0.187037585897  
ATAACGAC -0.00992983016867  
ATAACGAG 0.0787983819623  
ATAACGAT 0.202654250142  
ATAACGCA 0.173231025928  
ATAACGCC -0.127144940758  
ATAACGCG 0.15593371973  
ATAACGGA 0.167827504446  
ATAACGGC 0.117538099458  
ATAACGGG 0.0624739291752  
ATAACGTA 0.241646358866  
ATAACGTC 0.037890940858  
ATAACGTG 0.0994846821643  
ATAACTAA 0.0419383521043  
ATAACTAC -0.16969013559  
ATAACTAG -0.00632286109465  
ATAACTAT 0.0485300961736  
ATAACTCA 0.0149798370847  
ATAACTCC 0.0388290632067  
ATAACTCG 0.0899635557312  
ATAACTGA 0.0139629849173  
ATAACTGC 0.0897839698982  
ATAACTGG 0.000408900305166  
ATAACTTA 0.0933591078917  
ATAACTTC -0.100778696265  
ATAACTTG 0.0850623973966  
ATAAGAAA 0.14720410986  
ATAAGAAC -0.0206518644206  
ATAAGAAG 0.0214446559063  
ATAAGAAT 0.312183109846  
ATAAGACA 0.0306640091579  
ATAAGACC -0.207133058985  
ATAAGACG -0.0719044639819  
ATAAGAGA -0.0799414931166  
ATAAGAGC 0.109277526768  
ATAAGAGG -0.0192393183502  
ATAAGATA 0.288159454653  
ATAAGATC 0.330438099629  
ATAAGATG -0.00400079027956  
ATAAGCAA 0.064371740299  
ATAAGCAC -0.0786783227145  
ATAAGCAG -0.00561040379799  
ATAAGCAT 0.126208359363  
ATAAGCCA -0.319323997003  
ATAAGCCC -0.256533042847  
ATAAGCCG -0.0719382014764  
ATAAGCGA 0.0172664274403

ATAAGCGC -0.108682325049  
ATAAGCGG -0.147249111023  
ATAAGCTA -0.0880974335331  
ATAAGCTC -0.0747008566872  
ATAAGCTG -0.00525474699635  
ATAAGGAA 0.199329293728  
ATAAGGAC -0.23025828436  
ATAAGGAG -0.00574107005642  
ATAAGGAT 0.273187279357  
ATAAGGCA -0.0555390897715  
ATAAGGCC -0.0588785713502  
ATAAGGCG 0.0159457330279  
ATAAGGGA 0.0318931326544  
ATAAGGGC -0.20679210496  
ATAAGGGG -0.10769754245  
ATAAGGTA 0.0269509789395  
ATAAGGTC -0.279260696772  
ATAAGGTG -0.196446257145  
ATAAGTAA 0.227258727645  
ATAAGTAC 0.0477452852972  
ATAAGTAG 0.0250766347537  
ATAAGTAT 0.0925130079694  
ATAAGTCA -0.195241544701  
ATAAGTCC -0.0422660642424  
ATAAGTCG -0.0717523985159  
ATAAGTGA 0.0179812008775  
ATAAGTGC 0.0183390229761  
ATAAGTGG 0.187778546181  
ATAAGTTA 0.0533334301861  
ATAAGTTC -0.0215899350602  
ATAAGTTG 0.028595295861  
ATAATAAA 0.203512498765  
ATAATAAC 0.175019249488  
ATAATAAG 0.131159472927  
ATAATAAT 0.252978949051  
ATAATACA 0.161180816264  
ATAATACC -0.0344994406753  
ATAATACG 0.118511402252  
ATAATAGA 0.0193686167972  
ATAATAGC 0.0313316428462  
ATAATAGG 0.0713443396226  
ATAATATA 0.269876945707  
ATAATATC 0.366877805704  
ATAATATG 0.0826856304389  
ATAATCAA 0.221549256897  
ATAATCAC 0.240812092472  
ATAATCAG 0.20258951898  
ATAATCAT 0.238108959582  
ATAATCCA 0.329609321829  
ATAATCCC 0.246487299392  
ATAATCCG 0.312764226461  
ATAATCGA 0.214131200649  
ATAATCGC 0.265540784729  
ATAATCGG 0.110840730464

ATAATCTA 0.355441430709  
ATAATCTC 0.301192122769  
ATAATCTG 0.348124237878  
ATAATGAA 0.0442738221493  
ATAATGAC 0.132253424956  
ATAATGAG 0.0257420132785  
ATAATGAT 0.150597823718  
ATAATGCA 0.233961907806  
ATAATGCC 0.0539419884196  
ATAATGCG 0.069362985548  
ATAATGGA 0.218229269578  
ATAATGGC -0.124756669437  
ATAATGGG 0.0954288239039  
ATAATGTA 0.147396399289  
ATAATGTC 0.154479651185  
ATAATGTG 0.110982129136  
ATAATTAA 0.126312960353  
ATAATTAC 0.186162160592  
ATAATTAG 0.118926968169  
ATAATTAT 0.22158052801  
ATAATTCA 0.132324611741  
ATAATTCC 0.216891607223  
ATAATTCG 0.107083811544  
ATAATTGA 0.126901798064  
ATAATTGC 0.140966207942  
ATAATTGG 0.066477859009  
ATAATTTA 0.202395653248  
ATAATTTT 0.205718017959  
ATAATTTG 0.070601310418  
ATACAAA 0.243201678553  
ATACAAAC 0.0812012249333  
ATACAAAG -0.000126392863888  
ATACAAAT 0.293218369096  
ATACAACA 0.137917407627  
ATACAACC -0.0446991152385  
ATACAACG -0.0924627086832  
ATACAAGA 0.129975411096  
ATACAAGC -0.0390132639868  
ATACAAGG 0.139045313838  
ATACAATA 0.17443028387  
ATACAATC 0.266597416937  
ATACAATG -0.190731800672  
ATACACAA 0.181205954028  
ATACACAC 0.0495823224326  
ATACACAG 0.143576148763  
ATACACAT 0.170239565325  
ATACACCA 0.125987535049  
ATACACCC 0.110513835842  
ATACACCG 0.110169540773  
ATACACGA 0.141029738643  
ATACACGC -0.0886037278643  
ATACACGG 0.0664216291604  
ATACACTA 0.189500675548  
ATACACTC 0.00245667049235

ATACACTG -0.094915868155  
ATACAGAA 0.260745949817  
ATACAGAC 0.00493924725872  
ATACAGAG 0.120092195613  
ATACAGAT 0.256555721819  
ATACAGCA 0.0172616303322  
ATACAGCC -0.0787935482372  
ATACAGCG 0.052407846495  
ATACAGGA 0.189537640782  
ATACAGGC 0.0977133061177  
ATACAGGG -0.213595152121  
ATACAGTA 0.118073393488  
ATACAGTC -0.145902515696  
ATACAGTG 0.136786725496  
ATACATAA 0.061463251638  
ATACATAC 0.0862807086873  
ATACATAG 0.215103514896  
ATACATAT 0.185489720943  
ATACATCA 0.0550396276537  
ATACATCC -0.0854314064475  
ATACATCG 0.126813980548  
ATACATGA 0.147844018572  
ATACATGC 0.0223646512547  
ATACATGG -0.106734389235  
ATACATTA 0.0989566181475  
ATACATTC 0.124058706009  
ATACATTG 0.0444658499638  
ATACCAA 0.0563552365871  
ATACCAAC 0.0900541891244  
ATACCAAG 0.053903410527  
ATACCAAT 0.169866386561  
ATACCACA -0.0475147643197  
ATACCACC 0.153647720038  
ATACCACG -0.0403686140201  
ATACCAGA -0.165188052551  
ATACCAGC 0.0817498737623  
ATACCAGG 0.0143143550332  
ATACCATA 0.180569277042  
ATACCATC 0.0162352631232  
ATACCATG 0.09250203078  
ATACCCAA 0.220262793914  
ATACCCAC 0.0601806472413  
ATACCCAG 0.20847703863  
ATACCCAT 0.145013293043  
ATACCCCA 0.000842499286483  
ATACCCCC -0.0110746299014  
ATACCCCG 0.0249170497004  
ATACCCGA 0.0226706404092  
ATACCCGC 0.0917130452919  
ATACCCGG 0.0539614733618  
ATACCCTA 0.189235768074  
ATACCCTC 0.0580980559882  
ATACCCTG 0.0690584458036  
ATACCGAA 0.100759621507

ATACCGAC 0.0522212342752  
ATACCGAG 0.0473857016257  
ATACCGAT 0.293267764009  
ATACCGCA 0.140077169641  
ATACCGCC 0.131938169192  
ATACCGCG -0.0128762431667  
ATACCGGA -0.152706719078  
ATACCGGC -0.148346613109  
ATACCGGG 0.141081582472  
ATACCGTA 0.270357241439  
ATACCGTC 0.0102145773103  
ATACCGTG 0.0701882470611  
ATACCTAA 0.0670419711476  
ATACCTAC 0.0665480220243  
ATACCTAG 0.054979253112  
ATACCTAT 0.108053963863  
ATACCTCA 0.0420394287624  
ATACCTCC -0.141403993959  
ATACCTCG 0.12809408278  
ATACCTGA -0.0153109700289  
ATACCTGC -0.0588312529087  
ATACCTGG -0.0891495842595  
ATACCTTA 0.127184965823  
ATACCTTC 0.106148213793  
ATACCTTG -0.0701256893155  
ATACGAAA 0.236324146848  
ATACGAAC 0.140990907838  
ATACGAAG 0.119050363345  
ATACGAAT 0.312726404531  
ATACGACA 0.106467827931  
ATACGACC -0.0467076664691  
ATACGACG 0.191535489253  
ATACGAGA 0.22242964857  
ATACGAGC 0.00837451590504  
ATACGAGG -0.0440457374296  
ATACGATA 0.314265955345  
ATACGATC 0.214881226811  
ATACGATG 0.0655756245824  
ATACGCAA 0.384802347711  
ATACGCAC 0.251319861113  
ATACGCAG 0.164653408456  
ATACGCAT 0.166633736725  
ATACGCCA 0.0124954600264  
ATACGCCC 0.149075298185  
ATACGCCG 0.0800706056688  
ATACGCGA 0.218754085976  
ATACGCGC 0.184787262069  
ATACGCGG 0.224652419624  
ATACGCTA 0.199431958508  
ATACGCTC 0.0997326863568  
ATACGCTG 0.105973786472  
ATACGGAA 0.179169685394  
ATACGGAC 0.182273485697  
ATACGGAG 0.0228422413668

ATACGGAT 0.37560100112  
ATACGGCA 0.0380002854069  
ATACGGCC 0.11162978331  
ATACGGCG 0.229101937772  
ATACGGGA 0.142848909965  
ATACGGGC -0.0809241165721  
ATACGGGG 0.126540427739  
ATACGGTA 0.164413871254  
ATACGGTC 0.0427259654438  
ATACGGTG 0.0589121496956  
ATACGTAA 0.294589804309  
ATACGTAC 0.177926518694  
ATACGTAG 0.0207938052969  
ATACGTAT 0.204194181208  
ATACGTCA -0.0624046605553  
ATACGTCC 0.0325967639246  
ATACGTCCG 0.222775412956  
ATACGTGA 0.199155928116  
ATACGTGC 0.0788996556884  
ATACGTGG 0.0928929437915  
ATACGTTA 0.270099233792  
ATACGTTC 0.0545236997519  
ATACGTTG 0.0861517267119  
ATACTAAA 0.167485072567  
ATACTAAC -0.0185843816549  
ATACTAAG -0.00231893126084  
ATACTAAT 0.147266744048  
ATACTACA 0.0585386067751  
ATACTACC 0.00490898261009  
ATACTACG 0.0859541373027  
ATACTAGA 0.0622892383852  
ATACTAGC -0.105512744517  
ATACTAGG 0.225924279348  
ATACTATA 0.146399256171  
ATACTATC 0.219198006542  
ATACTATG 0.0657344587625  
ATACTCAA 0.147934092955  
ATACTCAC 0.0843708686241  
ATACTCAG 0.222565259391  
ATACTCAT 0.234647625412  
ATACTCCA 0.179772783403  
ATACTCCC 0.140869931574  
ATACTCCG 0.00559727299674  
ATACTCGA 0.183841327866  
ATACTCGC 0.038863336774  
ATACTCGG 0.0352909216635  
ATACTCTA 0.209008760333  
ATACTCTC 0.167975696503  
ATACTCTG 0.114775217944  
ATACTGAA 0.0161971728677  
ATACTGAC 0.000126392863888  
ATACTGAG 0.054187671611  
ATACTGAT 0.191546466443  
ATACTGCA 0.213624338624

ATACTGCC 0.0708934334453  
ATACTGCG 0.0782481968185  
ATACTGGA -0.033135753684  
ATACTGGC -0.0190257802182  
ATACTGGG -0.0380994581088  
ATACTGTA 0.208451669466  
ATACTGTC 0.0587746163472  
ATACTGTG 0.0650270268865  
ATACTTAA 0.0539610361309  
ATACTTAC 0.187578212474  
ATACTTAG 0.0979631825068  
ATACTTCA -0.0195158375511  
ATACTTCC 0.00696228237722  
ATACTTCG 0.0148526070509  
ATACTTGA 0.0970333996775  
ATACTTGC 0.0542328042328  
ATACTTGG 0.0181180239043  
ATACTTTA 0.0811443591937  
ATACTTTC 0.0629706469955  
ATACTTTG 0.136301016488  
ATAGAAAA 0.133603372193  
ATAGAAAC -0.154723100224  
ATAGAAAG 0.109861548966  
ATAGAAAT 0.263543649122  
ATAGAACA 0.00116078043961  
ATAGAACC -0.17140513192  
ATAGAACG -0.0176238141589  
ATAGAAGA 0.0882648356715  
ATAGAAGC -0.116967441656  
ATAGAAGG -0.0221146670179  
ATAGAATA 0.251059298777  
ATAGAATC 0.419372975172  
ATAGAATG -0.0371852290939  
ATAGACAA 0.0132770618744  
ATAGACAC 0.0104969373642  
ATAGACAG -0.112105722376  
ATAGACAT -0.0557668664515  
ATAGACCA -0.239694610417  
ATAGACCC -0.248664422063  
ATAGACCG -0.309108016767  
ATAGACGA -0.126631686902  
ATAGACGC -0.226935368942  
ATAGACGG -0.132914752803  
ATAGACTA -0.0236530988606  
ATAGACTC -0.151494945504  
ATAGACTG -0.218222024682  
ATAGAGAA 0.279320965235  
ATAGAGAC 0.0428659246087  
ATAGAGAG -0.178421687272  
ATAGAGAT 0.292827670124  
ATAGAGCA -0.0056938544788  
ATAGAGCC -0.234915696893  
ATAGAGCG -0.169039268955  
ATAGAGGA 0.12726426549

ATAGAGGC -0.156779464057  
ATAGAGGG -0.00762570278791  
ATAGAGTA -0.0150756177996  
ATAGAGTC -0.0898133513341  
ATAGAGTG -0.0489369642289  
ATAGATAA 0.00764286812005  
ATAGATAC 0.251973617306  
ATAGATAG 0.121136029331  
ATAGATAT 0.383515554677  
ATAGATCA 0.100621794779  
ATAGATCC 0.210727814943  
ATAGATCG 0.162371841314  
ATAGATGA 0.0200141605743  
ATAGATGC -0.0736085732629  
ATAGATGG -0.0716089020609  
ATAGATTA 0.342378537399  
ATAGATTC 0.422984614938  
ATAGATTG 0.345466564003  
ATAGCAAA 0.0656820127774  
ATAGCAAC -0.0356268069095  
ATAGCAAG 0.0243880115642  
ATAGCAAT 0.310332905265  
ATAGCACA -0.0850856420612  
ATAGCACC -0.162873131076  
ATAGCACG -0.122979024663  
ATAGCAGA 0.181385382012  
ATAGCAGC -0.24213795071  
ATAGCAGG -0.216162938087  
ATAGCATA 0.0595100880371  
ATAGCATC 0.158521348772  
ATAGCATG -0.00556817932337  
ATAGCCAA -0.112145948967  
ATAGCCAC 0.0988552002673  
ATAGCCAG -0.0585882768857  
ATAGCCAT -0.0991219761638  
ATAGCCCA 0.0609867360132  
ATAGCCCC -0.0439593006026  
ATAGCCCG -0.254434966175  
ATAGCCGA 0.130120353495  
ATAGCCGC -0.093591516828  
ATAGCCGG -0.246135229911  
ATAGCCTA -0.0050330413401  
ATAGCCTC 0.0847327867233  
ATAGCCTG -0.136645758219  
ATAGCGAA 0.0966324292127  
ATAGCGAC -0.149695702518  
ATAGCGAG -0.14292535151  
ATAGCGAT 0.253938066697  
ATAGCGCA 0.129868383499  
ATAGCGCC -0.0625837010692  
ATAGCGCG 0.0820179555246  
ATAGCGGA 0.125617466904  
ATAGCGGC -0.0724521943402  
ATAGCGGG -0.0663692289118



ATAGCGTA 0.257541613158  
ATAGCGTC 0.0486351023492  
ATAGCGTG 0.0398210160824  
ATAGCTAA -0.0957265801664  
ATAGCTAC -0.00723344907239  
ATAGCTAG 0.17064040923  
ATAGCTAT -0.046186271385  
ATAGCTCA -0.0719785567969  
ATAGCTCC -0.176733517529  
ATAGCTCG 0.0636100682781  
ATAGCTGA -0.101308480977  
ATAGCTGC -0.105522081742  
ATAGCTGG -0.1262533959  
ATAGCTTA -0.0891213656541  
ATAGCTTC -0.177955121203  
ATAGCTTG -0.0295839757473  
ATAGGAAA 0.197647039452  
ATAGGAAC -0.136148843336  
ATAGGAAG -0.0519066436157  
ATAGGAAT 0.310526927491  
ATAGGACA -0.015070133847  
ATAGGACC -0.119102540265  
ATAGGACG -0.128579147977  
ATAGGAGA 0.103300840853  
ATAGGAGC -0.10634311014  
ATAGGAGG -0.285363246622  
ATAGGATA 0.340373076867  
ATAGGATC 0.268694153549  
ATAGGATG -0.0208237282926  
ATAGGCAA -0.121111282184  
ATAGGCAC -0.0747098048901  
ATAGGCAG -0.157189268095  
ATAGGCAT -0.16019108455  
ATAGGCCA -0.134238210729  
ATAGGCCC -0.256392156863  
ATAGGCCG -0.172718067766  
ATAGGCCG 0.0169729635495  
ATAGGCCG -0.109706492495  
ATAGGCCG -0.00783458192695  
ATAGGCTA -0.0335380579157  
ATAGGCTC -0.0457831080276  
ATAGGCTG -0.242982983681  
ATAGGGAA -0.0321488239652  
ATAGGGAC -0.212799382716  
ATAGGGAG -0.0755204625688  
ATAGGGAT 0.164030334287  
ATAGGGCA -0.0115438815684  
ATAGGGCC -0.309604138552  
ATAGGGCG -0.0658778689462  
ATAGGGGA -0.0443950495321  
ATAGGGGC -0.324996296479  
ATAGGGGG -0.1949112258  
ATAGGGTA -0.0253057764169  
ATAGGGTC -0.0546336786135

ATAGGGTG -0.0451464357066  
ATAGGTAA 0.0984845990033  
ATAGGTAC -0.0918609245358  
ATAGGTAG -0.025806114207  
ATAGGTCA 0.052635623175  
ATAGGTCC -0.157191495295  
ATAGGTCCG -0.198871712133  
ATAGGTGA -0.137732338947  
ATAGGTGC -0.112332142485  
ATAGGTGG -0.134682576917  
ATAGGTTA 0.0293628261525  
ATAGGTTC 0.0464036145453  
ATAGGTTG -0.0164712726953  
ATAGTAAA 0.151828250895  
ATAGTAAC -0.0551755698575  
ATAGTAAG 0.013200070254  
ATAGTAAT 0.274738860721  
ATAGTACA 0.0116536586972  
ATAGTACC -0.234970737851  
ATAGTACG -0.133991618049  
ATAGTAGA 0.122815539309  
ATAGTAGC -0.0920503246989  
ATAGTAGG 0.15088257086  
ATAGTATA 0.142508680429  
ATAGTATC 0.197570199126  
ATAGTATG -0.000924296117956  
ATAGTCAA 0.131880057531  
ATAGTCAC -0.11592550085  
ATAGTCAG -0.0362989304314  
ATAGTCAT -0.130364752468  
ATAGTCCA -0.0202282157676  
ATAGTCCC -0.332082366303  
ATAGTCCG -0.255931412894  
ATAGTCGA -0.115992656137  
ATAGTCGC -0.11702448769  
ATAGTCGG -0.0810857538036  
ATAGTCTA 0.0900815605172  
ATAGTCTC -0.225967448088  
ATAGTCTG 0.111463375482  
ATAGTGAA 0.00579518544884  
ATAGTGAC -0.0759958863039  
ATAGTGAG 0.134152223497  
ATAGTGAT 0.12657446283  
ATAGTGCA 0.0345052518414  
ATAGTGCC -0.14268861454  
ATAGTGCG 0.112105029159  
ATAGTGGA 0.153404616972  
ATAGTGGC -0.246044244034  
ATAGTGGG -0.0136974836036  
ATAGTGTA 0.102211148722  
ATAGTGTC 0.0809820458362  
ATAGTGTG -0.0234911853169  
ATAGTTAA 0.0432074731597  
ATAGTTAC 0.0150739652277

ATAGTTAG 0.0238781734664  
ATAGTTCA -0.122571296845  
ATAGTTCC 0.0716869999012  
ATAGTTCG -0.121031746032  
ATAGTTGA -0.0863989656124  
ATAGTTGC -0.048219603969  
ATAGTTGG -0.124950612406  
ATAGTTTA -0.142421741985  
ATAGTTTC -0.0997907980184  
ATAGTTTG 0.0932320138752  
ATATAAAA 0.199766100562  
ATATAAAC 0.0489386792453  
ATATAAAG 0.102655702933  
ATATAAAT 0.292390871958  
ATATAACA 0.166137017278  
ATATAACC -0.101009352565  
ATATAACG 0.184686324317  
ATATAAGA 0.158187206718  
ATATAAGC -0.0219768363859  
ATATAAGG 0.130510075109  
ATATAATA 0.24555698259  
ATATAATC 0.292565071227  
ATATAATG 0.0854876067532  
ATATACAA 0.184968385695  
ATATACAC 0.0705009989242  
ATATACAG 0.322202463281  
ATATACAT 0.0581552557479  
ATATACCA 0.227218049482  
ATATACCC 0.0214960811434  
ATATACCG 0.119047619048  
ATATACGA 0.227902917737  
ATATACGC 0.0556488662748  
ATATACGG 0.0341418033327  
ATATACTA 0.188646107686  
ATATACTC 0.220144789128  
ATATACTG 0.210951393005  
ATATAGAA 0.284681904336  
ATATAGAC 0.0555637884476  
ATATAGAG 0.229554138277  
ATATAGAT 0.386424509868  
ATATAGCA 0.110245085933  
ATATAGCC 0.114684816876  
ATATAGCG 0.10798567735  
ATATAGGA 0.106508924455  
ATATAGGC -0.119365541446  
ATATAGGG 0.0346505309953  
ATATAGTA 0.153887955736  
ATATAGTC 0.0400897825171  
ATATAGTG 0.00843636046664  
ATATATAA 0.222894541862  
ATATATAC 0.225970932402  
ATATATAG 0.205759235811  
ATATATAT 0.276904395294  
ATATATCA 0.303340907594

ATATATCC 0.213220926914  
ATATATCG 0.316895563679  
ATATATGA 0.230734730914  
ATATATGC 0.134906913434  
ATATATGG 0.283428286022  
ATATATTA 0.206510632655  
ATATATTC 0.244479573186  
ATATATTG 0.286488896747  
ATATCAAA 0.223574448302  
ATATCAAC 0.348649256844  
ATATCAAG 0.29780047361  
ATATCAAT 0.275884212606  
ATATCACA 0.347442360496  
ATATCACC 0.291688621045  
ATATCACG 0.354485722755  
ATATCAGA 0.383457062746  
ATATCAGC 0.236342752692  
ATATCAGG 0.299073118998  
ATATCATA 0.320036900905  
ATATCATC 0.300305714725  
ATATCATG 0.368162353718  
ATATCCAA 0.412248347933  
ATATCCAC 0.392847907254  
ATATCCAG 0.397241148868  
ATATCCAT 0.434610274637  
ATATCCCA 0.371391248985  
ATATCCCC 0.352403455619  
ATATCCCG 0.268323288213  
ATATCCGA 0.402953525199  
ATATCCGC 0.408895584313  
ATATCCGG 0.445235154629  
ATATCCTA 0.447932446376  
ATATCCTC 0.397293449363  
ATATCCTG 0.341846207488  
ATATCGAA 0.367527278316  
ATATCGAC 0.313784086121  
ATATCGAG 0.245222178313  
ATATCGAT 0.370304507234  
ATATCGCA 0.36675613076  
ATATCGCC 0.344458326675  
ATATCGCG 0.409411125383  
ATATCGGA 0.35787624716  
ATATCGGC 0.34240872467  
ATATCGGG 0.35517794024  
ATATCGTA 0.399020834705  
ATATCGTC 0.31797393692  
ATATCGTG 0.336105073657  
ATATCTAA 0.453802498408  
ATATCTAC 0.376083997453  
ATATCTAG 0.406792684801  
ATATCTCA 0.388315330743  
ATATCTCC 0.416400563683  
ATATCTCG 0.427525304394  
ATATCTGA 0.405452326646

ATATCTGC 0.429108697743  
ATATCTGG 0.394129269391  
ATATCTTA 0.399684621325  
ATATCTTC 0.395431293772  
ATATCTTG 0.42342587104  
ATATGAAA 0.29138400404  
ATATGAAC 0.138894135081  
ATATGAAG 0.17271802769  
ATATGAAT 0.119494939516  
ATATGACA 0.05439047156  
ATATGACC 0.111692902149  
ATATGACG 0.167374695383  
ATATGAGA 0.16396641146  
ATATGAGC 0.136548003249  
ATATGAGG 0.119955544579  
ATATGATA 0.219198640187  
ATATGATC 0.238428098602  
ATATGATG 0.169959823487  
ATATGCAA 0.298993940591  
ATATGCAC 0.216182644952  
ATATGCAG 0.183335028257  
ATATGCAT 0.161814544017  
ATATGCCA 0.0730655447979  
ATATGCCC 0.135774111397  
ATATGCCG 0.0936738457485  
ATATGCCA 0.187324393823  
ATATGCGC 0.187008114566  
ATATGCGG 0.0976640540956  
ATATGCTA 0.261900800017  
ATATGCTC 0.154514918  
ATATGCTG 0.206527585677  
ATATGGAA 0.206895321522  
ATATGGAC 0.0411123186019  
ATATGGAG -0.0459177704696  
ATATGGAT 0.363092493798  
ATATGGCA 0.151002049788  
ATATGGCC -0.0646586642956  
ATATGGCG 0.130096160179  
ATATGGGA 0.223794704604  
ATATGGGC 0.0942041043428  
ATATGGGG 0.0117714505599  
ATATGGTA 0.203146246786  
ATATGGTC 0.165887286219  
ATATGGTG 0.152495169468  
ATATGTAA 0.132353744114  
ATATGTAC 0.0882209269139  
ATATGTAG 0.187333300405  
ATATGTCA 0.161523853433  
ATATGTCC 0.0449421062572  
ATATGTCC 0.200490131507  
ATATGTGA 0.11425002015  
ATATGTGC 0.0170928560451  
ATATGTGG 0.100262903686  
ATATGTTA 0.170509784551

ATATGTTTC 0.139986607829  
ATATGTTG 0.171387270641  
ATATTA AAA 0.126975433295  
ATATTAAC 0.113591955916  
ATATTAAG 0.186380079322  
ATATTAAT 0.249665195723  
ATATTACA 0.320638213792  
ATATTACC 0.170928560451  
ATATTACG 0.356256792807  
ATATTAGA 0.201535708797  
ATATTAGC 0.232546923303  
ATATTAGG 0.0873665247774  
ATATTATA 0.280946819978  
ATATTATC 0.193769756989  
ATATTATG 0.222548777476  
ATATTCAA 0.291128784386  
ATATTCAC 0.30117016839  
ATATTCAG 0.281632117145  
ATATTCAT 0.147709279621  
ATATTCCA 0.334195807244  
ATATTCCC 0.377478884718  
ATATTCCG 0.354626336473  
ATATTCGA 0.309899198423  
ATATTCGC 0.337128696569  
ATATTCGG 0.217707853081  
ATATTCTA 0.254854662012  
ATATTCTC 0.426411389904  
ATATTCTG 0.37032920591  
ATATTGAA 0.198773843941  
ATATTGAC 0.222784309851  
ATATTGAG 0.21882381997  
ATATTGAT 0.303782739467  
ATATTGCA 0.146037940915  
ATATTGCC 0.306796158819  
ATATTGCG 0.308105007794  
ATATTGGA 0.27478535005  
ATATTGGC 0.176498958704  
ATATTGGG 0.193501663446  
ATATTGTA 0.229429536396  
ATATTGTC 0.272294527314  
ATATTGTG 0.301574033389  
ATATTTAA 0.298867702913  
ATATTTAC 0.250293267806  
ATATTTAG 0.277923225537  
ATATTTCA 0.307196645371  
ATATTTCC 0.362173666701  
ATATTTCCG 0.34323105843  
ATATTTGA 0.235849056604  
ATATTTGC 0.290423499967  
ATATTTGG 0.136460185734  
ATATTTTA 0.294078264871  
ATATTTTC 0.352445774556  
ATATTTTG 0.219093723243  
ATCAAAAA 0.141299957869

ATCAAAAC -0.0869818766603  
ATCAAAAG 0.185300445674  
ATCAAAAT 0.260782344289  
ATCAAACA 0.122104766296  
ATCAAACC -0.0526415436032  
ATCAAACG 0.198775296733  
ATCAAAGA 0.178535005012  
ATCAAAGC 0.154064853235  
ATCAAAGG 0.0043162436622  
ATCAAATA 0.134085395087  
ATCAAATC 0.365896349896  
ATCAAATG 0.0660689587038  
ATCAACAA -0.000530268911714  
ATCAACAC 0.0826198160223  
ATCAACAG -0.0203434399198  
ATCAACAT 0.15166906299  
ATCAACCA 0.0866197899263  
ATCAACCC -0.118298425871  
ATCAACCG -0.0572651683543  
ATCAACGA 0.156934900411  
ATCAACGC 0.181999055962  
ATCAACGG 0.16146470443  
ATCAACTA 0.0666809370129  
ATCAACTC 0.101249400723  
ATCAACTG 0.172336384992  
ATCAAGAA 0.0726991811017  
ATCAAGAC 0.154339986167  
ATCAAGAG 0.192218492682  
ATCAAGAT 0.301741702065  
ATCAAGCA 0.138167739311  
ATCAAGCC 0.0235433564971  
ATCAAGCG 0.112247566088  
ATCAAGGA 0.0244983424444  
ATCAAGGC 0.13063404246  
ATCAAGGG -0.0647886914707  
ATCAAGTA 0.10197289091  
ATCAAGTC 0.123254834164  
ATCAAGTG 0.00971481261938  
ATCAATAA -0.0223523019166  
ATCAATAC 0.18954038508  
ATCAATAG 0.248845450953  
ATCAATCA 0.169234046231  
ATCAATCC 0.0043848815835  
ATCAATCG 0.0454592856045  
ATCAATGA 0.154758618686  
ATCAATGC 0.0901090034907  
ATCAATGG -0.0305769035201  
ATCAATTA 0.167935437944  
ATCAATTC -0.0323652899046  
ATCAATTG 0.0585946539025  
ATCACAAA 0.280137123424  
ATCACAAAC 0.0603416101341  
ATCACAAAG 0.198455682594  
ATCACAAAT 0.265385788793

ATCACACA 0.260646782793  
ATCACACC -0.00284309205471  
ATCACACG 0.161309798239  
ATCACAGA 0.116710008281  
ATCACAGC 0.182265252805  
ATCACAGG 0.0822207371464  
ATCACATA 0.190093414496  
ATCACATC 0.18561300539  
ATCACATG 0.24532920591  
ATCACCAA 0.0395987389769  
ATCACACC 0.0702512678654  
ATCACACG 0.16987636744  
ATCACCAT 0.208819897433  
ATCACCCA 0.039003094446  
ATCACCCC -0.0457091801897  
ATCACCCG 0.0779918223978  
ATCACCGA 0.199828755845  
ATCACCGC 0.187367977569  
ATCACCGG 0.0686705525917  
ATCACCTA 0.0921891808821  
ATCACCTC 0.179371812939  
ATCACCTG 0.0466912672701  
ATCACGAA 0.241815698865  
ATCACGAC 0.13491929743  
ATCACGAG 0.0583165051647  
ATCACGAT 0.267859887154  
ATCACGCA 0.234458762512  
ATCACGCC 0.170020198028  
ATCACGCG 0.16656180044  
ATCACGGA 0.0427831423491  
ATCACGGC 0.128712971976  
ATCACGGG 0.0420783112692  
ATCACGTA 0.265033260884  
ATCACGTC 0.0807301730275  
ATCACGTG 0.206929230897  
ATCACTAA 0.0734067916915  
ATCACTAC 0.182486597998  
ATCACTAG 0.0492659367196  
ATCACTCA 0.189099705083  
ATCACTCC 0.0673697890941  
ATCACTCG 0.045862697315  
ATCACTGA 0.106610201502  
ATCACTGC 0.0810265425014  
ATCACTGG 0.131708628129  
ATCACTTA 0.200329783679  
ATCACTTC 0.00926726266917  
ATCACTTG 0.123497450351  
ATCAGAAA 0.348168756265  
ATCAGAAC 0.104395815495  
ATCAGAAG 0.208218441736  
ATCAGAAT 0.328974409643  
ATCAGACA 0.179787311319  
ATCAGACC -0.0166010489155  
ATCAGACG 0.0957520375401



ATCAGAGA 0.228089529957  
ATCAGAGC 0.174025116072  
ATCAGAGG 0.0299732156579  
ATCAGATA 0.331689499221  
ATCAGATC 0.335436291168  
ATCAGATG 0.192859529586  
ATCAGCAA 0.152064260467  
ATCAGCAC 0.0258485367407  
ATCAGCAG 0.181628575819  
ATCAGCAT 0.236579838159  
ATCAGCCA 0.0415321960965  
ATCAGCCC -0.0232611105623  
ATCAGCCG 0.101754972179  
ATCAGCGA 0.195001536807  
ATCAGCGC 0.0592932885464  
ATCAGCGG 0.0722371536908  
ATCAGCTA -0.0820682122549  
ATCAGCTC -0.0519742475137  
ATCAGCTG 0.0783524336429  
ATCAGGAA 0.333077157759  
ATCAGGAC -0.0213109990847  
ATCAGGAG 0.0771647623124  
ATCAGGAT 0.377913210233  
ATCAGGCA 0.0912425726033  
ATCAGGCC -0.125887852411  
ATCAGGCG -0.00196949172813  
ATCAGGGA 0.0160946824645  
ATCAGGGC 0.0619744670575  
ATCAGGGG 0.0906239193795  
ATCAGGTA 0.188815890579  
ATCAGGTC 0.034741430406  
ATCAGGTG 0.138323188006  
ATCAGTAA 0.2793571267  
ATCAGTAC 0.161038112802  
ATCAGTAG 0.0944587147907  
ATCAGTCA 0.0396912098831  
ATCAGTCC -0.138494433728  
ATCAGTCG 0.110814726997  
ATCAGTGA 0.15186392676  
ATCAGTGC 0.0716371380272  
ATCAGTGG 0.0943704929369  
ATCAGTTA 0.167256690597  
ATCAGTTC 0.127400764917  
ATCAGTTG 0.133496344596  
ATCATAAA 0.225187046911  
ATCATAAC 0.118770066683  
ATCATAAG 0.0416558917961  
ATCATAAT 0.213230572545  
ATCATACA -0.0445893073013  
ATCATACC 0.0273112472283  
ATCATACG 0.276199806801  
ATCATAGA 0.213207205427  
ATCATAGC 0.146917909711  
ATCATAGG 0.00630887350273

ATCATATA 0.258887412673  
ATCATATC 0.308072076226  
ATCATATG 0.141751191025  
ATCATCAA 0.0261778524227  
ATCATCAC 0.115436123735  
ATCATCAG 0.0435648598783  
ATCATCAT 0.0432393044166  
ATCATCCA 0.170505426176  
ATCATCCC 0.0436123734879  
ATCATCCG 0.0357115414169  
ATCATCGA 0.144355293708  
ATCATCGC -0.00669301061991  
ATCATCGG 0.169109091308  
ATCATCTA 0.193239697908  
ATCATCTC 0.0293812560836  
ATCATCTG 0.134783420053  
ATCATGAA 0.203629607675  
ATCATGAC 0.0212238315924  
ATCATGAG 0.0409628239323  
ATCATGAT 0.201047310795  
ATCATGCA 0.0264249728341  
ATCATGCC 0.0321342960499  
ATCATGCG 0.0201022765243  
ATCATGGA 0.193511383345  
ATCATGGC 0.155592446512  
ATCATGGG 0.00535051321249  
ATCATGTA 0.16566617756  
ATCATGTC 0.176298759545  
ATCATGTG 0.186343278667  
ATCATTAA 0.23132780083  
ATCATTAC 0.217248993942  
ATCATTAG 0.147721296471  
ATCATTCA 0.00108232969651  
ATCATTCC 0.0650539368214  
ATCATT CG 0.0424157858342  
ATCATTGA 0.093433382244  
ATCATTGC -0.00215929093098  
ATCATTGG 0.21954149899  
ATCATTTA 0.237797277469  
ATCATTTT -0.0220610026091  
ATCATTTG 0.0899030988044  
ATCCAAAA 0.239308180669  
ATCCAAAC 0.147305798091  
ATCCAAAG 0.295653247715  
ATCCAAAT 0.343860457968  
ATCCAACA 0.181280050056  
ATCCAACC -0.00575160170267  
ATCCAACG 0.279416123296  
ATCCAAGA 0.229089244984  
ATCCAAGC 0.174487527785  
ATCCAAGG 0.0984324573536  
ATCCAATA 0.338761553492  
ATCCAATC 0.207634419537  
ATCCAATG 0.237422457252

ATCCACAA 0.292913282873  
ATCCACAC 0.138892716651  
ATCCACAG 0.17677712725  
ATCCACAT 0.320312931297  
ATCCACCA 0.172871522975  
ATCCACCC 0.222327953162  
ATCCACCG 0.276559309754  
ATCCACGA 0.228746386181  
ATCCACGC 0.278399895399  
ATCCACGG 0.281046235922  
ATCCACTA 0.178248973633  
ATCCACTC 0.29829140047  
ATCCACTG 0.339232275224  
ATCCAGAA 0.238358055003  
ATCCAGAC 0.121902285241  
ATCCAGAG 0.143098513794  
ATCCAGAT 0.337930031395  
ATCCAGCA 0.223379774236  
ATCCAGCC 0.247411851873  
ATCCAGCG 0.0462084787811  
ATCCAGGA 0.357867592579  
ATCCAGGC 0.0714352127613  
ATCCAGGG 0.21686981535  
ATCCAGTA 0.26588673736  
ATCCAGTC 0.0854662734444  
ATCCAGTG 0.308153066117  
ATCCATAA 0.300184965641  
ATCCATAC 0.234865544143  
ATCCATAG 0.057459758669  
ATCCATCA 0.0733807918007  
ATCCATCC 0.140710124504  
ATCCATCG 0.138193889559  
ATCCATGA 0.166342839579  
ATCCATGC 0.252502433426  
ATCCATGG 0.162651416864  
ATCCATTA 0.261251619135  
ATCCATTC 0.181060456386  
ATCCATTG 0.212183582516  
ATCCCAA 0.190619325033  
ATCCCAAC 0.188044743024  
ATCCCAAG 0.152624097126  
ATCCCAAT 0.257015420535  
ATCCCACA 0.180566532745  
ATCCCACC 0.0973370911842  
ATCCCACG 0.184156747012  
ATCCCAGA 0.280965525257  
ATCCCAGC 0.161685528743  
ATCCCAGG -0.00614997036159  
ATCCCATA 0.254034117105  
ATCCCATC 0.199437769674  
ATCCCATG 0.113756613757  
ATCCCAA 0.241815884373  
ATCCCCAC 0.168985597928  
ATCCCCAG 0.266180377176

ATCCCAT 0.281726788023  
ATCCCCA 0.216464486511  
ATCCCCCC 0.101495093196  
ATCCCCCCG 0.269375154359  
ATCCCCGA 0.296947545194  
ATCCCCGC 0.22675315619  
ATCCCCGG 0.245941184219  
ATCCCCTA 0.273448781834  
ATCCCCTC 0.138802109059  
ATCCCCTG 0.173290427557  
ATCCCGAA 0.244387911919  
ATCCCGAC 0.289183665909  
ATCCCGAG 0.229615155521  
ATCCCGAT 0.33746898944  
ATCCCGCA 0.283201002667  
ATCCCGCC 0.234017212233  
ATCCCGCG 0.283735647325  
ATCCCGGA 0.295106998097  
ATCCGGC 0.036103153435  
ATCCGGG 0.0148987903137  
ATCCGTA 0.276633405783  
ATCCGTC 0.0866256010925  
ATCCGTG 0.20821263057  
ATCCCTAA 0.28964450191  
ATCCCTAC 0.135317362312  
ATCCCTAG 0.146029550594  
ATCCCTCA 0.107362747519  
ATCCCTCC 0.0504394694405  
ATCCCTCG 0.120869973323  
ATCCCTGA 0.152056270374  
ATCCCTGC 0.00271949143186  
ATCCCTGG 0.0479493847428  
ATCCCTTA 0.162242859338  
ATCCCTTC 0.0737335289759  
ATCCCTTG 0.133002371073  
ATCCGAAA 0.205091038618  
ATCCGAAC 0.164457455  
ATCCGAAG 0.203543358563  
ATCCGAAT 0.306082460647  
ATCCGACA 0.275170695295  
ATCCGACC 0.129152599497  
ATCCGACG 0.235545785857  
ATCCGAGA 0.293261952842  
ATCCGAGC 0.183568794046  
ATCCGAGG 0.248937956926  
ATCCGATA 0.356808052866  
ATCCGATC 0.322008647564  
ATCCGATG 0.253481614923  
ATCCGCAA 0.346410878503  
ATCCGCAC 0.259970032273  
ATCCGCAG 0.219027210786  
ATCCGCAT 0.301127366234  
ATCCGCCA 0.225550244795  
ATCCGCC 0.189425130388

ATCCGCCG 0.260745572618  
ATCCGCGA 0.290737001148  
ATCCGCGC 0.188881753716  
ATCCGCGG 0.332531370418  
ATCCGCTA 0.329677625558  
ATCCGCTC 0.253394695822  
ATCCGCTG 0.244802638269  
ATCCGGAA 0.350975549518  
ATCCGGAC 0.236399692008  
ATCCGGAG 0.200030252889  
ATCCGGAT 0.405637860082  
ATCCGGCA 0.217661586739  
ATCCGGCC 0.253121322621  
ATCCGGCG -0.0354976509099  
ATCCGGGA 0.21926382331  
ATCCGGGC 0.12014259369  
ATCCGGGG 0.270011477053  
ATCCGGTA 0.222258219168  
ATCCGGTC 0.184232853428  
ATCCGGTG 0.364865567565  
ATCCGTAA 0.265567889954  
ATCCGTAC 0.183041888955  
ATCCGTAG 0.0650151485214  
ATCCGTCA 0.159528829979  
ATCCGTCC 0.0492412081399  
ATCCGTCCG 0.211791147994  
ATCCGTGA 0.154081319019  
ATCCGTGC 0.197092964131  
ATCCGTGG 0.0461217729868  
ATCCGTTA 0.292689552976  
ATCCGTTC 0.14560603199  
ATCCGTTG 0.244415563568  
ATCCTAAA 0.239549344065  
ATCCTAAC 0.205533682972  
ATCCTAAG 0.155467189181  
ATCCTAAT 0.252290325861  
ATCCTACA 0.285670376957  
ATCCTACC 0.0628492147662  
ATCCTACG 0.197177764605  
ATCCTAGA 0.204827626284  
ATCCTAGC 0.250090799471  
ATCCTAGG 0.159361347121  
ATCCTATA 0.26711892687  
ATCCTATC 0.330956082112  
ATCCTATG 0.194115128762  
ATCCTCAA 0.30703904475  
ATCCTCAC 0.0704967094272  
ATCCTCAG 0.277871079279  
ATCCTCAT 0.269440529978  
ATCCTCCA 0.221755553296  
ATCCTCCC 0.0994505916705  
ATCCTCCG 0.237527058242  
ATCCTCGA 0.163514613239  
ATCCTCGC 0.268180959714

ATCCTCGG 0.233648104833  
ATCCTCTA 0.329812514787  
ATCCTCTC 0.242011350414  
ATCCTCTG 0.295286723303  
ATCCTGAA 0.152791538942  
ATCCTGAC 0.23973871382  
ATCCTGAG 0.223831759907  
ATCCTGCA 0.172394015236  
ATCCTGCC 0.175003842016  
ATCCTGCG 0.240078287069  
ATCCTGGA 0.272911248965  
ATCCTGGC 0.327707523766  
ATCCTGGG 0.120214141473  
ATCCTGTA 0.315322509825  
ATCCTGTC 0.165971263783  
ATCCTGTG 0.234877166475  
ATCCTTAA 0.177156755942  
ATCCTTAC 0.291641967991  
ATCCTTAG 0.191406738047  
ATCCTTCA 0.238221475773  
ATCCTTCC 0.0701635213912  
ATCCTTCG 0.0986766998178  
ATCCTTGA 0.230635015182  
ATCCTTGC 0.188796680498  
ATCCTTGG 0.258271312213  
ATCCTTTA 0.281925915911  
ATCCTTTC 0.119205904145  
ATCCTTTG 0.150033669859  
ATCGAAAA 0.176454607528  
ATCGAAAC 0.142732900522  
ATCGAAAG 0.149326472829  
ATCGAAAT 0.4160199323  
ATCGAACA 0.147183763602  
ATCGAACC 0.0331303608525  
ATCGAACG 0.103570961603  
ATCGAAGA 0.0922508099313  
ATCGAAGC 0.14712565194  
ATCGAAGG 0.168089433847  
ATCGAATA 0.244440053569  
ATCGAATC 0.358207545799  
ATCGAATG 0.0338115579915  
ATCGACAA -0.0591169933026  
ATCGACAC 0.0893077644967  
ATCGACAG 0.0440529978353  
ATCGACAT 0.000276016758575  
ATCGACCA 0.105209858119  
ATCGACCC 0.0795187600167  
ATCGACCG -0.00624845640899  
ATCGACGA -0.0182541642655  
ATCGACGC 0.136548003249  
ATCGACGG -0.0258183494698  
ATCGACTA -0.0250130347685  
ATCGACTC 0.137102351314  
ATCGACTG 0.124444670434

ATCGAGAA 0.223176383421  
ATCGAGAC -0.0200039513978  
ATCGAGAG 0.0362863742682  
ATCGAGAT 0.334307558893  
ATCGAGCA 0.154967727063  
ATCGAGCC 0.00648751893565  
ATCGAGCG 0.124894375444  
ATCGAGGA -0.100169597576  
ATCGAGGC -0.131201161946  
ATCGAGGG 0.0897955922305  
ATCGAGTA 0.156987200907  
ATCGAGTC -0.0333255851118  
ATCGAGTG 0.0760225251926  
ATCGATAA 0.110238612785  
ATCGATAC 0.29096961514  
ATCGATAG 0.0867811355192  
ATCGATCA 0.160506425873  
ATCGATCC 0.0503396885733  
ATCGATCG 0.189677599947  
ATCGATGA 0.0568051575931  
ATCGATGC 0.0787195095376  
ATCGATGG -0.00496207915927  
ATCGATTA 0.139909593914  
ATCGATTC 0.334833093701  
ATCGATTG 0.267758348153  
ATCGCAAA 0.285706052822  
ATCGCAAC 0.113412171488  
ATCGCAAG 0.284012821357  
ATCGCAAT 0.416364793958  
ATCGCACA 0.289932154635  
ATCGCACC 0.158063294474  
ATCGCACG 0.172227176646  
ATCGCAGA 0.237849577964  
ATCGCAGC 0.032130233375  
ATCGCAGG 0.0463456936486  
ATCGCATA 0.233209361789  
ATCGCATC 0.242774541281  
ATCGCATG 0.340712748908  
ATCGCCAA 0.212585533102  
ATCGCCAC 0.176137898973  
ATCGCCAG 0.114577158664  
ATCGCCAT 0.128048914356  
ATCGCCCA 0.189205580803  
ATCGCCCC 0.223885345692  
ATCGCCCG 0.197903289539  
ATCGCCGA 0.23873191508  
ATCGCCGC 0.208154954006  
ATCGCCGG 0.163600412878  
ATCGCCTA 0.155453053041  
ATCGCCTC 0.111296907007  
ATCGCCTG 0.136159981404  
ATCGCGAA 0.341439425857  
ATCGCGAC 0.197910491998  
ATCGCGAG 0.325407802586

ATCGCGAT 0.423209179345  
ATCGCGCA 0.384381038165  
ATCGCGCC 0.299683291445  
ATCGCGCG 0.320400554318  
ATCGCGGA 0.297262288964  
ATCGCGGC 0.270299567499  
ATCGCGGG 0.30350007684  
ATCGCGTA 0.326224529857  
ATCGCGTC 0.256625455813  
ATCGCGTG 0.291091482283  
ATCGCTAA 0.157803669751  
ATCGCTAC 0.172857495678  
ATCGCTAG 0.0440651825507  
ATCGCTCA -0.0242313659634  
ATCGCTCC 0.240272834251  
ATCGCTCG 0.0790165536016  
ATCGCTGA 0.139846648664  
ATCGCTGC 0.205562738803  
ATCGCTGG 0.17726788733  
ATCGCTTA 0.212888866935  
ATCGCTTC 0.223164761088  
ATCGCTTG 0.187317504226  
ATCGGAAA 0.19860205493  
ATCGGAAC 0.0546444488353  
ATCGGAAG 0.221979283193  
ATCGGAAT 0.257950401697  
ATCGGACA 0.145818239698  
ATCGGACC -0.0971117806204  
ATCGGACG -0.0996543209877  
ATCGGAGA 0.264938328999  
ATCGGAGC 0.103196141386  
ATCGGAGG -0.0657254191707  
ATCGGATA 0.342765483326  
ATCGGATC 0.304517834206  
ATCGGATG -0.0116961953062  
ATCGGCAA 0.219483413467  
ATCGGCAC 0.0392942216075  
ATCGGCAG 0.0582036716885  
ATCGGCAT 0.21201718858  
ATCGGCCA -0.0550067231964  
ATCGGCCC 0.0578972389608  
ATCGGCCG 0.164877384794  
ATCGGCGA 0.106347010911  
ATCGGCGC 0.136169290215  
ATCGGCGG 0.0313497886188  
ATCGGCTA 0.106045138203  
ATCGGCTC -0.0853723462645  
ATCGGCTG 0.138438824123  
ATCGGGAA 0.297088605756  
ATCGGGAC 0.174452238249  
ATCGGGAG 0.1190970164  
ATCGGGCA 0.211426205454  
ATCGGGCC -0.0730219933076  
ATCGGGCG 0.0738831315605



ATCGGGGA 0.315292083739  
ATCGGGGC -0.0398103329053  
ATCGGGGG -0.0932556457166  
ATCGGGTA 0.0964086993157  
ATCGGGTC 0.0210515049727  
ATCGGGTG 0.104576293348  
ATCGGTAA 0.2342205047  
ATCGGTAC 0.0318530593427  
ATCGGTAG 0.139164354307  
ATCGGTCA -0.0149170042486  
ATCGGTCC -0.125225523607  
ATCGGTCCG 0.17535236778  
ATCGGTGA 0.200289105516  
ATCGGTGC -0.0274853631252  
ATCGGTGG 0.00445399459922  
ATCGGTTA 0.0610166979547  
ATCGGTTC 0.00945746027867  
ATCGGTTG -0.104059660213  
ATCGTAAA 0.219774893806  
ATCGTAAC 0.237343300621  
ATCGTAAG 0.120141595405  
ATCGTAAT 0.42030566734  
ATCGTACA 0.13574941272  
ATCGTACC -0.0106588509078  
ATCGTACG 0.13086181914  
ATCGTAGA 0.265780948092  
ATCGTAGC 0.132350761989  
ATCGTAGG 0.0499270734669  
ATCGTATA 0.197493870526  
ATCGTATC 0.378559353663  
ATCGTATG 0.100275980441  
ATCGTCAA 0.293458692836  
ATCGTCAC 0.110149837371  
ATCGTCAG 0.154659828861  
ATCGTCAT 0.257969439505  
ATCGTCCA 0.0295367047782  
ATCGTCCC 0.021281943254  
ATCGTCCG 0.144135806953  
ATCGTCGA 0.178823903928  
ATCGTCGC 0.162946551799  
ATCGTCGG 0.0612918222364  
ATCGTCTA 0.173941798942  
ATCGTCTC 0.112215071259  
ATCGTCTG 0.151685547432  
ATCGTGAA 0.186598587375  
ATCGTGAC 0.100171079281  
ATCGTGAG 0.119981694827  
ATCGTGCA 0.137088324229  
ATCGTGCC 0.10550317435  
ATCGTGCG 0.228615634943  
ATCGTGGA 0.213884328738  
ATCGTGGC 0.10101484116  
ATCGTGGG 0.20862697315  
ATCGTGTA 0.180711286737

ATCGTGTC 0.145870381348  
ATCGTGTG 0.15630694417  
ATCGTTAA 0.163350183319  
ATCGTTAC 0.00799413818086  
ATCGTTAG -0.0150801392868  
ATCGTTCA 0.154392515218  
ATCGTTCC 0.144301425189  
ATCGTTCCG -0.00463081321031  
ATCGTTGA 0.164611450903  
ATCGTTGC 0.141114000552  
ATCGTTGG -0.182521464995  
ATCGTTTA 0.162166019012  
ATCGTTTC 0.103486699693  
ATCGTTTG 0.032250519373  
ATCTAAAA 0.201313254484  
ATCTAAAC 0.193414495954  
ATCTAAAG 0.148703383551  
ATCTAAAT 0.363577063327  
ATCTAACA 0.223838613361  
ATCTAACC 0.253545537751  
ATCTAACG 0.304136753826  
ATCTAAGA 0.267629366177  
ATCTAAGC 0.261517815978  
ATCTAAGG 0.274702410353  
ATCTAATA 0.22815074165  
ATCTAATC 0.380220166947  
ATCTAATG 0.203633431639  
ATCTACAA 0.0993782052213  
ATCTACAC 0.316634283958  
ATCTACAG 0.316375866227  
ATCTACAT 0.334245036057  
ATCTACCA 0.219121166217  
ATCTACCC 0.197392470952  
ATCTACCG 0.333045196345  
ATCTACGA 0.3172972439  
ATCTACGC 0.251796376738  
ATCTACGG 0.23831737684  
ATCTACTA 0.322674482426  
ATCTACTC 0.242848080038  
ATCTACTG 0.182023157497  
ATCTAGAA 0.243482293793  
ATCTAGAC 0.280909021054  
ATCTAGAG 0.175760173173  
ATCTAGAT 0.459658305353  
ATCTAGCA 0.33908549837  
ATCTAGCC 0.169924147621  
ATCTAGCG 0.126732567723  
ATCTAGGA 0.23922369526  
ATCTAGGC 0.147983490307  
ATCTAGGG 0.232985631892  
ATCTAGTA 0.359130068426  
ATCTAGTC 0.247225894556  
ATCTAGTG 0.33847340227  
ATCTATAA 0.236451992504

ATCTATAC 0.144783751979  
ATCTATAG 0.277668005884  
ATCTATCA 0.298571905917  
ATCTATCC 0.219047549867  
ATCTATCG 0.111056661164  
ATCTATGA 0.239418592826  
ATCTATGC 0.114437199499  
ATCTATGG 0.212372939033  
ATCTATTA 0.166903955951  
ATCTATTC 0.201132297087  
ATCTATTG 0.255941403763  
ATCTCAA 0.342286403324  
ATCTCAAC 0.274413435416  
ATCTCAAG 0.297050978068  
ATCTCAAT 0.296609146194  
ATCTCACA 0.230150497267  
ATCTCACC 0.321321168626  
ATCTCACG 0.160217567894  
ATCTCAGA 0.300552060785  
ATCTCAGC 0.239061230762  
ATCTCAGG 0.351876280273  
ATCTCATA 0.261470515596  
ATCTCATC 0.347581828483  
ATCTCATG 0.31765236586  
ATCTCCAA 0.384256098092  
ATCTCCAC 0.260948963433  
ATCTCCAG 0.275030744871  
ATCTCCAT 0.363537069969  
ATCTCCCA 0.264534452951  
ATCTCCCC 0.284306461174  
ATCTCCCG 0.123994305057  
ATCTCCGA 0.292994639199  
ATCTCCGC 0.228890864783  
ATCTCCGG 0.362161578921  
ATCTCCTA 0.324656736442  
ATCTCCTC 0.284775736021  
ATCTCCTG 0.31312158335  
ATCTCGAA 0.324281957782  
ATCTCGAC 0.271156276786  
ATCTCGAG 0.335545236998  
ATCTCGCA 0.309812154054  
ATCTCGCC 0.295560269057  
ATCTCGCG 0.338920722738  
ATCTCGGA 0.357257420133  
ATCTCGGC 0.310576322403  
ATCTCGGG 0.325525547339  
ATCTCGTA 0.355833684425  
ATCTCGTC 0.321299589453  
ATCTCGTG 0.301580637194  
ATCTCTAA 0.200317240774  
ATCTCTAC 0.280950185515  
ATCTCTAG 0.311664361457  
ATCTCTCA 0.303681200465  
ATCTCTCC 0.194140891723

ATCTCTCG 0.274072656327  
ATCTCTGA 0.167668335199  
ATCTCTGC 0.289701749764  
ATCTCTGG 0.192295659619  
ATCTCTTA 0.326057269042  
ATCTCTTC 0.291147994467  
ATCTCTTG 0.362175898483  
ATCTGAAA 0.257058332784  
ATCTGAAC 0.305356613652  
ATCTGAAG 0.195381575698  
ATCTGAAT 0.289889682463  
ATCTGACA 0.200538985661  
ATCTGACC 0.322556477639  
ATCTGACG 0.230344456874  
ATCTGAGA 0.313092709671  
ATCTGAGC 0.162838616078  
ATCTGAGG 0.243008440719  
ATCTGATA 0.34136314738  
ATCTGATC 0.382574260686  
ATCTGATG 0.276261386254  
ATCTGCAA 0.326924216975  
ATCTGCAC 0.339049704714  
ATCTGCAG 0.288878460559  
ATCTGCAT 0.346776981971  
ATCTGCCA 0.293378176166  
ATCTGCCC 0.230620487266  
ATCTGCCG 0.2370475044  
ATCTGCGA 0.326891171386  
ATCTGCGC 0.361462381172  
ATCTGCGG 0.219878592285  
ATCTGCTA 0.291905420536  
ATCTGCTC 0.0652264594173  
ATCTGCTG 0.280041823092  
ATCTGGAA 0.310352237921  
ATCTGGAC 0.275423170651  
ATCTGGAG 0.177525954391  
ATCTGGCA 0.0969491377682  
ATCTGGCC 0.112483259786  
ATCTGGCG 0.342708460624  
ATCTGGGA 0.275245727551  
ATCTGGGC 0.155592521029  
ATCTGGGG 0.37340556324  
ATCTGGTA 0.176046675009  
ATCTGGTC 0.285003512701  
ATCTGGTG 0.332452457397  
ATCTGTAA 0.313511273574  
ATCTGTAC 0.344757843202  
ATCTGTAG 0.338517311028  
ATCTGTCA 0.0631290348581  
ATCTGTCC 0.259014812138  
ATCTGTCC 0.334884430433  
ATCTGTGA 0.275349033167  
ATCTGTGC 0.268191947134  
ATCTGTGG -0.00242894747546

ATCTGTTA 0.222275652667  
ATCTGTTC 0.178391677095  
ATCTGTTG 0.251429778919  
ATCTTAAA 0.28647445608  
ATCTTAAC 0.312526070825  
ATCTTAAG 0.212212408708  
ATCTTAAT 0.316044629756  
ATCTTACA 0.307162262287  
ATCTTACC 0.302416429851  
ATCTTACG 0.248701947353  
ATCTTAGA 0.133103308006  
ATCTTAGC 0.302118319668  
ATCTTAGG 0.198453862873  
ATCTTATA 0.34002667457  
ATCTTATC 0.247823644177  
ATCTTATG 0.141174888582  
ATCTTCAA 0.290308239478  
ATCTTCAC 0.345620559906  
ATCTTCAG 0.281796522017  
ATCTTCAT 0.326280499852  
ATCTTCCA 0.282208522671  
ATCTTCCC 0.193461985993  
ATCTTCCG 0.27090880151  
ATCTTCGA 0.246726053261  
ATCTTCGC 0.251094974643  
ATCTTCGG 0.257572483454  
ATCTTCTA 0.244832312556  
ATCTTCTC 0.320176368893  
ATCTTCTG 0.343662656617  
ATCTTGAA 0.299869248761  
ATCTTGAC 0.234319294524  
ATCTTGAG 0.255518428661  
ATCTTGCA 0.310923594121  
ATCTTGCC 0.248332921709  
ATCTTGCG 0.14042247178  
ATCTTGGA 0.258562207732  
ATCTTGGC 0.246824924092  
ATCTTGGG 0.262625484869  
ATCTTGTA 0.277104236162  
ATCTTGTC 0.321653603811  
ATCTTGTG 0.266029582676  
ATCTTTAA 0.219442249007  
ATCTTTAC 0.230239855883  
ATCTTTAG 0.287541987749  
ATCTTTCA 0.316942454927  
ATCTTTCC 0.280663344617  
ATCTTTCCG 0.25150581843  
ATCTTTGA 0.36381532114  
ATCTTTGC 0.226205549937  
ATCTTTGG 0.294635996399  
ATCTTTTA 0.204778231372  
ATCTTTTC 0.310471196021  
ATCTTTTG 0.178020716807  
ATGAAAAA 0.0882004271207

ATGAAAAC 0.139083734001  
ATGAAAAG 0.0985297749626  
ATGAAAAT 0.270469713934  
ATGAAACA 0.0433033574012  
ATGAAACC -0.0678225647105  
ATGAAACG 0.118008803917  
ATGAAAGA 0.209598593698  
ATGAAAGC -0.205532777888  
ATGAAAGG -0.287494553377  
ATGAAATA 0.182265773684  
ATGAAATC 0.450545607708  
ATGAAATG -0.0500597038341  
ATGAACAA 0.0795022942326  
ATGAACAC -0.102489380618  
ATGAACAG -0.101364327032  
ATGAACAT -0.0836708819074  
ATGAACCA -0.142879483761  
ATGAACCC -0.207564270153  
ATGAACCG -0.145574290562  
ATGAACGA 0.0554265735801  
ATGAACGC -0.0226190084187  
ATGAACGG -0.0154024270843  
ATGAACTA -0.206631993375  
ATGAACTC -0.149374458862  
ATGAACTG 0.119193066807  
ATGAAGAA 0.12100229675  
ATGAAGAC -0.0804191774507  
ATGAAGAG -0.142898850488  
ATGAAGCA -0.0594671160635  
ATGAAGCC -0.174127674054  
ATGAAGCG -0.0382341319418  
ATGAAGGA 0.0347208500735  
ATGAAGGC -0.11946414202  
ATGAAGGG -0.202265616603  
ATGAAGTA -0.255200266121  
ATGAAGTC -0.130744453773  
ATGAAGTG -0.15936280804  
ATGAATAA 0.158236185207  
ATGAATAC 0.0439338689291  
ATGAATAG -0.0416669087866  
ATGAATCA 0.0706546795758  
ATGAATCC 0.0840890270655  
ATGAATCG 0.117459648715  
ATGAATGA -0.0323754594453  
ATGAATGC -0.00459395376408  
ATGAATGG 0.0940031614305  
ATGAATTA 0.199609199076  
ATGAATTC -0.0338399306242  
ATGAATTG 0.100133656822  
ATGACAAA 0.202250374094  
ATGACAAC 0.0189022707132  
ATGACAAG -0.0665432823332  
ATGACAAT 0.0780410558889  
ATGACACA -0.0751572646841

ATGACACC -0.0986343759534  
ATGACACG -0.112203179621  
ATGACAGA -0.187992423362  
ATGACAGC -0.0895339614583  
ATGACAGG -0.252030178326  
ATGACATA -0.00754956201014  
ATGACATC 0.0360074382927  
ATGACATG -0.0243705780658  
ATGACCAA -0.111810906935  
ATGACCAC -0.374502721875  
ATGACCAG -0.122768148998  
ATGACCAT -0.133101781237  
ATGACCCA -0.226864690243  
ATGACCCC -0.279571750687  
ATGACCCG -0.235254903897  
ATGACCGA -0.0671861108367  
ATGACCGC -0.0960634199348  
ATGACCGG -0.101820297108  
ATGACCTA -0.154733485894  
ATGACCTC -0.0685189973071  
ATGACCTG -0.0323125051453  
ATGACGAA -0.160517730723  
ATGACGAC -0.218094720727  
ATGACGAG -0.15615240021  
ATGACGCA -0.186852720836  
ATGACGCC -0.21174982578  
ATGACGCG -0.00296065809475  
ATGACGGA 0.0399111323732  
ATGACGGC -0.141726704748  
ATGACGGG -0.196290012869  
ATGACGTA 0.0758429822905  
ATGACGTC 0.0107576456124  
ATGACGTG -0.0309342902387  
ATGACTAA 0.134614211207  
ATGACTAC 0.0380181017826  
ATGACTAG -0.0802588677008  
ATGACTCA -0.1216387229  
ATGACTCC -0.142225127088  
ATGACTCG -0.0310213770204  
ATGACTGA -0.0864891249397  
ATGACTGC -0.116726034482  
ATGACTGG -0.229885791962  
ATGACTTA -0.307046026964  
ATGACTTC -0.262214842978  
ATGACTTG -0.0119041738701  
ATGAGAAA 0.0874333135744  
ATGAGAAC -0.0978987861074  
ATGAGAAG -0.031935263609  
ATGAGAAT 0.3847355193  
ATGAGACA -0.0363991652672  
ATGAGACC -0.20070761216  
ATGAGACG -0.218778682715  
ATGAGAGA 0.0521087180838  
ATGAGAGC -0.0677335440745

ATGAGAGG -0.210957403851  
ATGAGATA 0.209124983656  
ATGAGATC 0.366517376891  
ATGAGATG 0.0442447663185  
ATGAGCAA 0.03095963338  
ATGAGCAC 0.0339207841975  
ATGAGCAG -0.253926990508  
ATGAGCAT -0.11055415631  
ATGAGCCA -0.274654555912  
ATGAGCCC -0.265029379814  
ATGAGCCG -0.230067586211  
ATGAGCGA -0.0510762527233  
ATGAGCGC 0.0834156622538  
ATGAGCGG -0.0789412520083  
ATGAGCTA -0.0774889951041  
ATGAGCTC -0.218856183327  
ATGAGCTG -0.123717917058  
ATGAGGAA -0.114880031172  
ATGAGGAC -0.0620006395973  
ATGAGGAG -0.114171558703  
ATGAGGCA -0.17465831646  
ATGAGGCC -0.203458691177  
ATGAGGCG -0.244829903978  
ATGAGGGA -0.133355895571  
ATGAGGGC -0.165214233842  
ATGAGGGG -0.0963315544994  
ATGAGGTA 0.15490389784  
ATGAGGTC -0.120919632959  
ATGAGGTG -0.130873120069  
ATGAGTAA 0.0800291993238  
ATGAGTAC 0.0204528140982  
ATGAGTAG 0.0952871442477  
ATGAGTCA -0.108271043937  
ATGAGTCC -0.200681000044  
ATGAGTCG -0.0250913760743  
ATGAGTGA -0.0638032837262  
ATGAGTGC -0.047289731937  
ATGAGTGG -0.00391033537081  
ATGAGTTA 0.0469576719577  
ATGAGTTC -0.074629282053  
ATGAGTTG -0.0835583434862  
ATGATAAA 0.191864804935  
ATGATAAC 0.0680311313091  
ATGATAAG -0.00979165294518  
ATGATAAT 0.193644037017  
ATGATACA 0.0623029651475  
ATGATACC 0.176618220883  
ATGATACG 0.198874086557  
ATGATAGA 0.138349318933  
ATGATAGC 0.0578991854925  
ATGATAGG -0.0367379086259  
ATGATATA 0.160401640154  
ATGATATC 0.421956127784  
ATGATATG 0.235504621397



ATGATCAA -0.082791388148  
ATGATCAC 0.0783795563175  
ATGATCAG 0.104736100417  
ATGATCAT 0.165300411523  
ATGATCCA 0.147573111734  
ATGATCCC 0.0888570581843  
ATGATCCG 0.0803815030581  
ATGATCGA 0.0292157895892  
ATGATCGC 0.243890768547  
ATGATCGG -0.00407756321612  
ATGATCTA 0.0657606090102  
ATGATCTC 0.219077257459  
ATGATCTG 0.0209971961123  
ATGATGAA 0.0316938900964  
ATGATGAC -0.138037433683  
ATGATGAG -0.182093788768  
ATGATGCA -0.135255455737  
ATGATGCC -0.0759069051182  
ATGATGCG 0.00613899317219  
ATGATGGA -0.0174748223155  
ATGATGGC -0.113200942385  
ATGATGGG -0.00877409626808  
ATGATGTA 0.0731073758226  
ATGATGTC -0.119955544579  
ATGATGTG -0.0479188761205  
ATGATTAA -0.00304891435597  
ATGATTAC 0.314449464646  
ATGATTAG 0.0560181889501  
ATGATTCA 0.0299677270632  
ATGATTCC 0.341384219778  
ATGATTCCG 0.193623697936  
ATGATTGA 0.0345573477262  
ATGATTGC 0.343437836176  
ATGATTGG -0.00956953786701  
ATGATTTA 0.0374980789919  
ATGATTTT 0.395971409063  
ATGATTTG 0.218319783057  
ATGCAAAA 0.0708852005533  
ATGCAAAC -0.0924951844718  
ATGCAAAG 0.182111777781  
ATGCAAAT 0.309002393027  
ATGCAACA -0.0202998561736  
ATGCAACC -0.0516010230741  
ATGCAACG 0.0857887931661  
ATGCAAGA 0.137249171222  
ATGCAAGC -0.110831234257  
ATGCAAGG -0.0496811122572  
ATGCAATA 0.0670075083975  
ATGCAATC 0.453263696192  
ATGCAATG -0.0571174169061  
ATGCACAA 0.00958308634657  
ATGCACAC -0.319681034908  
ATGCACAG 0.00449790335682  
ATGCACAT 0.0726305736679

ATGCACCA 0.00594918135197  
ATGCACCC -0.18044028318  
ATGCACCG 0.0326763485477  
ATGCACGA -0.0178364934831  
ATGCACGC -0.0271930753037  
ATGCACGG 0.0195763659872  
ATGCACTA -0.0706751402197  
ATGCACTC -0.19150475283  
ATGCACTG -0.106641431821  
ATGCAGAA 0.222749262708  
ATGCAGAC -0.25724982863  
ATGCAGAG -0.0446716161566  
ATGCAGCA -0.177651401906  
ATGCAGCC -0.180603371887  
ATGCAGCG -0.107962979813  
ATGCAGGA 0.0286024391315  
ATGCAGGC -0.0578115454108  
ATGCAGGG -0.160281119015  
ATGCAGTA 0.217769093313  
ATGCAGTC -0.183722378609  
ATGCAGTG -0.0730916156227  
ATGCATAA 0.0472145016991  
ATGCATAC -0.0301693147828  
ATGCATAG 0.0362905881578  
ATGCATCA -0.045102526949  
ATGCATCC -0.147607312844  
ATGCATCG -0.0567634451368  
ATGCATGA -0.0244187578212  
ATGCATGC -0.197178028285  
ATGCATGG -0.185943451107  
ATGCATTA -0.117963621594  
ATGCATTC 0.107071505412  
ATGCATTG -0.0741567718189  
ATGCCAAA -0.182510877378  
ATGCCAAC -0.0210843636047  
ATGCCAAG -0.0104857313863  
ATGCCAAT 0.0295991748144  
ATGCCACA -0.0750499363449  
ATGCCACC -0.0272316626051  
ATGCCACG -0.0958471698058  
ATGCCAGA -0.235918602084  
ATGCCAGC 0.0767295777358  
ATGCCAGG 0.0478313417529  
ATGCCATA 0.0370113172461  
ATGCCATC -0.149017186524  
ATGCCATG -0.245365569984  
ATGCCCAA -0.0626186791355  
ATGCCCAC -0.0672347081584  
ATGCCCAG -0.163583331397  
ATGCCCAT -0.0859788359788  
ATGCCCCA -0.226063366291  
ATGCCCCC -0.18522085048  
ATGCCCCG 0.0443835210433  
ATGCCCGA -0.0515110606235

ATGCCCGC -0.025618442425  
ATGCCCGG -0.0779257745787  
ATGCCCTA -0.0831179379112  
ATGCCCTC -0.272469821426  
ATGCCCTG -0.032722513089  
ATGCCGAA -0.132104283974  
ATGCCGAC -0.229162551034  
ATGCCGAG -0.108772969769  
ATGCCGCA -0.0805375135829  
ATGCCGCC -0.0502705609887  
ATGCCGCG -0.00976598944099  
ATGCCGGA -0.0427964636736  
ATGCCGGC -0.167206437745  
ATGCCGGG -0.17162262287  
ATGCCGTA -0.0533450525184  
ATGCCGTC -0.112535190399  
ATGCCGTG -0.180400564005  
ATGCCTAA -0.0122789940871  
ATGCCTAC -0.0414745658522  
ATGCCTAG -0.228763011616  
ATGCCTCA 0.00409190740698  
ATGCCTCC -0.324247099482  
ATGCCTCG -0.159785668428  
ATGCCTGA 0.0862889415794  
ATGCCTGC -0.181502312501  
ATGCCTGG -0.152148399485  
ATGCCTTA -0.0781161479261  
ATGCCTTC 0.0422951107598  
ATGCCTTG -0.167855434715  
ATGCGAAA 0.097053738759  
ATGCGAAC 0.0117455926585  
ATGCGAAG -0.15600749668  
ATGCGAAT 0.36653933127  
ATGCGACA -0.134870504559  
ATGCGACC -0.103713947056  
ATGCGACG 0.0874449755205  
ATGCGAGA 0.102466840033  
ATGCGAGC -0.242365637413  
ATGCGAGG -0.036460361088  
ATGCGATA 0.264147856367  
ATGCGATC 0.377753403164  
ATGCGATG 0.0497876123679  
ATGCGCAA 0.109428617088  
ATGCGCAC -0.0231618696349  
ATGCGCAG -0.097854720274  
ATGCGCAT 0.156326735829  
ATGCGCCA -0.090170030183  
ATGCGCCC -0.204307604698  
ATGCGCCG -0.0342728051952  
ATGCGCGA 0.128875684628  
ATGCGCGC 0.0120704493041  
ATGCGCGG -0.0102389734132  
ATGCGCTA 0.230854330412  
ATGCGCTC -0.0491610128863

ATGCGCTG 0.0599087646914  
ATGCGGAA 0.095010318558  
ATGCGGAC -0.0964074883213  
ATGCGGAG -0.0960286887045  
ATGCGGCA -0.0102649179794  
ATGCGGCC -0.338991552956  
ATGCGGCG -0.0874421091167  
ATGCGGGA 0.016111207152  
ATGCGGGC -0.129436167988  
ATGCGGGG -0.0113448335474  
ATGCGGTA -0.0876948823588  
ATGCGGTC -0.240562872059  
ATGCGGTG -0.163509077705  
ATGCGTAA 0.147891278857  
ATGCGTAC -0.0755945717547  
ATGCGTAG -0.0063969571231  
ATGCGTCA 0.0975709325469  
ATGCGTCC -0.167256515775  
ATGCGTCG -0.0432642810345  
ATGCGTGA 0.00403440210364  
ATGCGTGC -0.105294350059  
ATGCGTGG -0.316532281489  
ATGCGTTA 0.0076699322192  
ATGCGTTC -0.136306505082  
ATGCGTTG -0.170708850954  
ATGCTAAA 0.0940406491073  
ATGCTAAC -0.103561633152  
ATGCTAAG -0.00371577861204  
ATGCTAAT 0.156843454302  
ATGCTACA 0.0254012162726  
ATGCTACC -0.071397029772  
ATGCTACG -0.055939738207  
ATGCTAGA -0.0855532505735  
ATGCTAGC -0.0144032210256  
ATGCTAGG -0.0795892944359  
ATGCTATA 0.205267953193  
ATGCTATC 0.0837984687577  
ATGCTATG -0.0501605334651  
ATGCTCAA -0.108765170187  
ATGCTCAC -0.130542215404  
ATGCTCAG -0.0519444170042  
ATGCTCCA -0.153092527445  
ATGCTCCC -0.266978201245  
ATGCTCCG -0.0876600739071  
ATGCTCGA 0.0625480252036  
ATGCTCGC -0.123188363696  
ATGCTCGG -0.20377072417  
ATGCTCTA -0.234347037906  
ATGCTCTC -0.091999476995  
ATGCTCTG 0.06508070257  
ATGCTGAA 0.080273441788  
ATGCTGAC -0.0718187497276  
ATGCTGAG -0.0868551170818  
ATGCTGCA -0.00725965813655

ATGCTGCC -0.160401530359  
ATGCTGCG -0.195693614499  
ATGCTGGA -0.0709413107665  
ATGCTGGC -0.0272182661774  
ATGCTGGG -0.148709429175  
ATGCTGTA 0.018710619333  
ATGCTGTC -0.137738173408  
ATGCTGTG 0.00738453939244  
ATGCTTAA -0.0356360732398  
ATGCTTAC -0.217295312252  
ATGCTTAG -0.0344056458296  
ATGCTTCA -0.0666661178614  
ATGCTTCC -0.103465945572  
ATGCTTCG -0.0175017563503  
ATGCTTGA 0.0738061685529  
ATGCTTGC -0.0855917358301  
ATGCTTGG -0.0311038661661  
ATGCTTTA 0.0320238838929  
ATGCTTTC 0.0261894730725  
ATGCTTTG 0.0265410486249  
ATGGA AAA 0.0673093811061  
ATGGA AAC -0.0991011013977  
ATGGA AAG -0.00823207876453  
ATGGA AAT 0.363814244001  
ATGGA ACA -0.0617814436158  
ATGGA ACC -0.075733187674  
ATGGA ACG -0.0885722918168  
ATGGA AGA 0.133123647088  
ATGGA AGC -0.274439606468  
ATGGA AGG -0.241332033788  
ATGGA ATA 0.118264495228  
ATGGA ATC 0.410246538724  
ATGGA ATG 0.0163024213933  
ATGGA CAA -0.113635901385  
ATGGA CAC -0.115744183885  
ATGGA CAG -0.107395699562  
ATGGA CAT 0.0386342180948  
ATGGA CCA -0.243290423023  
ATGGA CCC -0.279493670228  
ATGGA CCG -0.298947961567  
ATGGA CGA -0.106979338555  
ATGGA CGC -0.0726629072136  
ATGGA CGG -0.120109217639  
ATGGA CTA -0.10618832801  
ATGGA CTC -0.325649440225  
ATGGA CTG -0.194222200272  
ATGGA GAA -0.100004648474  
ATGGA GAC -0.131872081475  
ATGGA GAG -0.0525029049138  
ATGGA GCA -0.19298066953  
ATGGA GCC -0.38474026917  
ATGGA GCG -0.236304498099  
ATGGA GGA -0.099950617284  
ATGGA GGC -0.156529362375

ATGGAGGG -0.205995631514  
ATGGAGTA -0.159907678811  
ATGGAGTC -0.0912204439175  
ATGGAGTG -0.113640457665  
ATGGATAA 0.147384248834  
ATGGATAC 0.218027690207  
ATGGATAG 0.0064518430701  
ATGGATCA 0.0147211366641  
ATGGATCC 0.0749989022811  
ATGGATCG 0.133088816439  
ATGGATGA -0.0805896877269  
ATGGATGC -0.122674884688  
ATGGATGG -0.260665613273  
ATGGATTA 0.31756656622  
ATGGATTC 0.417028169628  
ATGGATTG 0.253230037981  
ATGGCAAA 0.0772580012494  
ATGGCAAC -0.17032631241  
ATGGCAAG -0.116742148487  
ATGGCAAT 0.18982319527  
ATGGCACA -0.195232063588  
ATGGCACC -0.0905739419434  
ATGGCACG -0.086605503521  
ATGGCAGA -0.107771480364  
ATGGCAGC -0.11477836233  
ATGGCAGG -0.0967731158837  
ATGGCATA -0.149993172554  
ATGGCATC -0.201112799077  
ATGGCATG -0.170357883817  
ATGGCCAA -0.168387400395  
ATGGCCAC -0.285599065067  
ATGGCCAG -0.351767464824  
ATGGCCAT 0.198701362828  
ATGGCCCA -0.242942628903  
ATGGCCCC -0.165951030748  
ATGGCCCG -0.330093598437  
ATGGCCGA -0.129152347393  
ATGGCCGC -0.223810542717  
ATGGCCGG -0.306046590735  
ATGGCCTA -0.155391624199  
ATGGCCTC -0.315644285362  
ATGGCCTG -0.12891347415  
ATGGCGAA -0.0361259303168  
ATGGCGAC -0.137976868033  
ATGGCGAG -0.0336041069265  
ATGGCGCA 0.0153819084309  
ATGGCGCC -0.228030465153  
ATGGCGCG -0.10937148439  
ATGGCGGA -0.153397866456  
ATGGCGGC -0.132261437908  
ATGGCGGG -0.230005548567  
ATGGCGTA -0.0799112097669  
ATGGCGTC -0.284759255602  
ATGGCGTG 0.066158130001

ATGGCTAA -0.136288359066  
ATGGCTAC -0.351064551962  
ATGGCTAG -0.105285255619  
ATGGCTCA -0.0777014976156  
ATGGCTCC -0.0871737338703  
ATGGCTCG -0.10102857641  
ATGGCTGA -0.0735134318471  
ATGGCTGC -0.257396687074  
ATGGCTGG -0.214364495366  
ATGGCTTA -0.124772694263  
ATGGCTTC -0.185368129305  
ATGGCTTG -0.0961566961419  
ATGGGAAA 0.0407144828789  
ATGGGAAC -0.101500788863  
ATGGGAAG -0.276819086064  
ATGGGAAT 0.327644404927  
ATGGGACA -0.084856434795  
ATGGGACC -0.302805242184  
ATGGGACG -0.0440991257964  
ATGGGAGA 0.00603690705836  
ATGGGAGC -0.258715753574  
ATGGGAGG -0.251530713016  
ATGGGATA 0.255966102439  
ATGGGATC 0.194322323212  
ATGGGATG -0.116950687413  
ATGGGCAA -0.0916021996729  
ATGGGCAC -0.192977834851  
ATGGGCAG -0.287459588137  
ATGGGCCA -0.182265347665  
ATGGGCCC -0.330047450561  
ATGGGCCG -0.0631036261469  
ATGGGCGA 0.00558601725614  
ATGGGCGC -0.131942837983  
ATGGGCGG -0.166617283951  
ATGGGCTA -0.00900105176912  
ATGGGCTC -0.136276494697  
ATGGGCTG -0.121376722137  
ATGGGGAA -0.10666282484  
ATGGGGAC -0.104777868326  
ATGGGGAG -0.0979264044993  
ATGGGGCA -0.0431661156016  
ATGGGGCC -0.208704407899  
ATGGGGCG -0.118009584033  
ATGGGGGA -0.144039857757  
ATGGGGGC -0.279930180821  
ATGGGGGG -0.271626582383  
ATGGGGTA 0.0999593218369  
ATGGGGTC -0.390097540719  
ATGGGGTG -0.0729864712823  
ATGGGTAA 0.0519547071026  
ATGGGTAC -0.282203673521  
ATGGGTAG -0.110200094395  
ATGGGTCA -0.279563697815  
ATGGGTCC -0.321738343291

ATGGGTTCG -0.116315112148  
ATGGGTGA -0.0530198248041  
ATGGGTGC -0.107701586278  
ATGGGTGG 0.0761981602231  
ATGGGTTA -0.0315778768904  
ATGGGTTC -0.197568216876  
ATGGGTTG -0.159129198839  
ATGGTAAA 0.0957210915717  
ATGGTAAC -0.0545264440493  
ATGGTAAG -0.0714587586994  
ATGGTAAT 0.311660104892  
ATGGTACA -0.017608129779  
ATGGTACC 0.0982071360975  
ATGGTACG -0.0448896532291  
ATGGTAGA 0.088470646347  
ATGGTAGC -0.246031423285  
ATGGTAGG -0.204357373783  
ATGGTATA 0.0884529284977  
ATGGTATC 0.243855418186  
ATGGTATG -0.00712013133236  
ATGGTCAA -0.140367265701  
ATGGTCAC -0.142709810119  
ATGGTCAG -0.029350750475  
ATGGTCCA -0.0328432502442  
ATGGTCCC -0.0203680247287  
ATGGTCCG -0.203982939957  
ATGGTCGA -0.0958144311136  
ATGGTCGC -0.151043381853  
ATGGTCGG -0.0746915409778  
ATGGTCTA -0.254390729676  
ATGGTCTC -0.307327671341  
ATGGTCTG -0.189563623583  
ATGGTGAA -0.0193787863379  
ATGGTGAC -0.218907127317  
ATGGTGAG 0.0145991021748  
ATGGTGCA 0.00940371504792  
ATGGTGCC -0.271073347858  
ATGGTGCG -0.0429030421661  
ATGGTGGA -0.153841255319  
ATGGTGGC -0.0199208544644  
ATGGTGGG -0.16424691358  
ATGGTGTA 0.139090315821  
ATGGTGTC -0.0670749777734  
ATGGTGTG -0.129692153473  
ATGGTTAA 0.196968672732  
ATGGTTAC -0.189732609757  
ATGGTTAG -0.0422515363271  
ATGGTTCA -0.225659807956  
ATGGTTCC -0.050872794045  
ATGGTTCCG -0.0859255837466  
ATGGTTGA -0.0442476719016  
ATGGTTGC -0.224408671177  
ATGGTTGG -0.141948407752  
ATGGTTTA 0.0726305736679



ATGGTTTC -0.0384248834135  
ATGGTTTG -0.111790271225  
ATGTAAAA 0.236882258666  
ATGTAAAC -0.0697812903049  
ATGTAAAG 0.0733509517223  
ATGTAAAT 0.190596080368  
ATGTAACA 0.0159808328805  
ATGTAACC 0.0431711533712  
ATGTAACG -0.106134823169  
ATGTAAGA 0.130510549079  
ATGTAAGC 0.12422384612  
ATGTAAGG -0.0724302399614  
ATGTAATA 0.213900276598  
ATGTAATC 0.46892083251  
ATGTAATG 0.159701299022  
ATGTACAA -0.0609663969317  
ATGTACAC -0.0660813174425  
ATGTACAG 0.0517135392654  
ATGTACAT 0.189736625514  
ATGTACCA -0.0233193588593  
ATGTACCC -0.254326047359  
ATGTACCG 0.0371115598623  
ATGTACGA 0.01852163933  
ATGTACGC -0.0902023096006  
ATGTACGG -0.0796983801669  
ATGTACTA 0.0334212713041  
ATGTACTC -0.107147734372  
ATGTACTG -0.122886760275  
ATGTAGAA 0.0141770401107  
ATGTAGAC -0.0209335001866  
ATGTAGAG -0.0260790577181  
ATGTAGCA -0.0909518801099  
ATGTAGCC -0.136811866193  
ATGTAGCG -0.152128565161  
ATGTAGGA 0.0519568817811  
ATGTAGGC -0.256957475995  
ATGTAGGG -0.0469963534932  
ATGTAGTA 0.169943195851  
ATGTAGTC -0.0943573576627  
ATGTAGTG 0.00765185303561  
ATGTATAA 0.186243516918  
ATGTATAC 0.0652676238776  
ATGTATAG -0.113578191686  
ATGTATCA 0.0929041098027  
ATGTATCC 0.0815059637093  
ATGTATCG -0.194448271828  
ATGTATGA -0.0567317617266  
ATGTATGC 0.0792221754101  
ATGTATGG 0.0108952542399  
ATGTATTA 0.0183385875961  
ATGTATTC 0.210046053492  
ATGTATTG -0.094809654403  
ATGTCAAA 0.0585193966937  
ATGTCAAC -0.0145924387118

ATGTCAAG -0.00708346165691  
ATGTCAAT 0.142563503041  
ATGTCACA 0.103071201313  
ATGTCACC -0.00844217163279  
ATGTCACG -0.0781356341522  
ATGTCAGA 0.0073380500632  
ATGTCAGC 0.00437277733873  
ATGTCAGG -0.109448718247  
ATGTCATA 0.0882242171293  
ATGTCATC -0.0754229384745  
ATGTCATG 0.0272097082263  
ATGTCCAA 0.12755768513  
ATGTCCAC -0.0959815786033  
ATGTCCAG -0.265051476034  
ATGTCCCA -0.226647462277  
ATGTCCCC -0.139347406041  
ATGTCCCG 0.0224895167841  
ATGTCCGA 0.0113008525364  
ATGTCCGC -0.133249269282  
ATGTCCGG 0.0039051351292  
ATGTCCTA -0.00623229928209  
ATGTCCTC -0.105811872928  
ATGTCCTG 0.0630206441678  
ATGTCGAA 0.0501779669635  
ATGTCGAC 0.0580693319283  
ATGTCGAG -0.1428320081  
ATGTCGCA 0.0026862115555  
ATGTCGCC -0.0681332480579  
ATGTCGCG 0.0743238051329  
ATGTCGGA -0.01177196984  
ATGTCGGC -0.113648992394  
ATGTCGGG -0.154683504012  
ATGTCGTA 0.0910585303739  
ATGTCGTC -0.214893871388  
ATGTCGTG -0.044507721587  
ATGTCTAA -0.0326747345023  
ATGTCTAC -0.146355741882  
ATGTCTAG 0.000779888063125  
ATGTCTCA -0.0243103576015  
ATGTCTCC 0.0310517245165  
ATGTCTCG -0.0389478883675  
ATGTCTGA 0.0435430680052  
ATGTCTGC -0.0922852768311  
ATGTCTGG -0.0444714017986  
ATGTCTTA -0.129270843927  
ATGTCTTC -0.114124039342  
ATGTCTTG -0.025759446777  
ATGTGAAA 0.241509143999  
ATGTGAAC -0.03817317614  
ATGTGAAG 0.162173666701  
ATGTGAAT 0.199208228611  
ATGTGACA 0.0221361846789  
ATGTGACC -0.230081528299  
ATGTGACG -0.129756930926

ATGTGAGA 0.0144712565194  
ATGTGAGC -0.22771714977  
ATGTGAGG 0.0264888925045  
ATGTGATA 0.247449624453  
ATGTGATC 0.222445965727  
ATGTGATG -0.0679954554436  
ATGTGCAA 0.0708206819403  
ATGTGCAC -0.00404783859141  
ATGTGCAG -0.136126734376  
ATGTGCCA -0.102426263606  
ATGTGCCC -0.115457219369  
ATGTGCCG -0.00573009286702  
ATGTGCGA 0.0992914224242  
ATGTGCGC 0.059684049327  
ATGTGCGG -0.0792486485003  
ATGTGCTA -0.130749785713  
ATGTGCTC 0.0802871632747  
ATGTGCTG -0.0471634942589  
ATGTGGAA -0.0162204175323  
ATGTGGAC -0.174999862805  
ATGTGGAG -0.0374660409978  
ATGTGGCA -0.122043790107  
ATGTGGCC -0.114209252573  
ATGTGGCG -0.0219821887757  
ATGTGGGA -0.0412735266512  
ATGTGGGC -0.368387272798  
ATGTGGGG -0.109463484085  
ATGTGGTA -0.0386553376476  
ATGTGGTC -0.053568880547  
ATGTGGTG -0.0803887022767  
ATGTGTAA 0.0960174756855  
ATGTGTAC -0.152021947874  
ATGTGTAG 0.0199279415397  
ATGTGTCA -0.0768814902632  
ATGTGTCC -0.0503745111598  
ATGTGTCCG 0.122933767234  
ATGTGTGA 0.0990614966658  
ATGTGTGC -0.214786645595  
ATGTGTGG 0.0171734487818  
ATGTGTTA -0.0854343411758  
ATGTGTTC -0.122310588597  
ATGTGTTG -0.014492332545  
ATGTTAAA 0.116506617465  
ATGTTAAC 0.067286417397  
ATGTTAAG -0.0426153200316  
ATGTTAAT 0.189047404588  
ATGTTACA 0.00339517382651  
ATGTTACC -0.0379457670651  
ATGTTACG 0.0354699054233  
ATGTTAGA 0.165423499967  
ATGTTAGC -0.0548488989879  
ATGTTAGG -0.112877544201  
ATGTTATA 0.120739592894  
ATGTTATC 0.155034649078

ATGTTATG 0.113519423218  
ATGTTCAA 0.0166304419416  
ATGTTCAC -0.0759344319872  
ATGTTCAG 0.0891534583703  
ATGTTCCA -0.0813271604938  
ATGTTCCC 0.0261998068015  
ATGTTCCG -0.143582999951  
ATGTTCGA 0.104860973896  
ATGTTCGC -0.235012977321  
ATGTTCGG -0.0703456191071  
ATGTTCTA 0.134160736525  
ATGTTCTC -0.0801548675781  
ATGTTCTG 0.0661179957288  
ATGTTGAA 0.150127269465  
ATGTTGAC -0.13786668862  
ATGTTGAG 0.0194703122049  
ATGTTGCA -0.0160760938769  
ATGTTGCC -0.0815594079781  
ATGTTGCG 0.00883733093138  
ATGTTGGA 0.0874042973574  
ATGTTGGC -0.210144569584  
ATGTTGGG 0.0774289747983  
ATGTTGTA 0.0977114896117  
ATGTTGTC 0.0702032455363  
ATGTTGTG 0.0602126281587  
ATGTTTAA 0.121078399087  
ATGTTTAC 0.0776800807921  
ATGTTTAG -0.0885421811716  
ATGTTTCA 0.00024973105886  
ATGTTTCC -0.0329476846552  
ATGTTTCG 0.0396355335308  
ATGTTTGA 0.105517702265  
ATGTTTGC -0.196157834955  
ATGTTTGG -0.138654995308  
ATGTTTTA 0.0191608676071  
ATGTTTTC 0.187038958045  
ATGTTTTG -0.0506611012316  
ATTA AAAA 0.212971195855  
ATTA AAAAC 0.0243880115642  
ATTA AAAAG 0.0504873390629  
ATTA AAAAT 0.13848735345  
ATTA AAACA -0.00194664450785  
ATTA AAACC -0.126215200098  
ATTA AAACG -0.148253018174  
ATTA AAAGA 0.0440581149559  
ATTA AAAGC 0.0805180654628  
ATTA AAAGG -0.0384366286856  
ATTA AAATA 0.099067307832  
ATTA AAATC 0.169327212238  
ATTA AAATG -0.00724096958793  
ATTA ACAA 0.045699010649  
ATTA ACAC 0.147459793994  
ATTA ACAG 0.0683509363241  
ATTA ACCA 0.0209636874575

ATTAACCC -0.0863525692802  
ATTAACCG -0.13435559854  
ATTAACGA 0.20481514413  
ATTAACGC 0.00643887295673  
ATTAACGG -0.0170333876624  
ATTAACTA 0.0651664172708  
ATTAACTC -0.166016816684  
ATTAACTG 0.0200394158345  
ATTAAGAA 0.218094799008  
ATTAAGAC -0.0773103017448  
ATTAAGAG -0.0443011921228  
ATTAAGCA -0.156694488345  
ATTAAGCC -0.122481710258  
ATTAAGCG -0.0249017541549  
ATTAAGGA -0.0699356736701  
ATTAAGGC -0.0603653584442  
ATTAAGGG -0.0149125118005  
ATTAAGTA 0.162237589528  
ATTAAGTC 0.144981229006  
ATTAAGTG 0.0529004983075  
ATTAATAA 0.0673313354849  
ATTAATAC 0.101543873516  
ATTAATAG -0.136098214188  
ATTAATCA 0.150563129816  
ATTAATCC 0.164364809668  
ATTAATCG 0.0412330676853  
ATTAATGA 0.129808008957  
ATTAATGC 0.0350153529355  
ATTAATGG 0.00520647813279  
ATTAATTA 0.11535241552  
ATTAATTC 0.0903146922241  
ATTAATTG 0.171093581407  
ATTACAAA 0.344425783222  
ATTACAAC 0.241164921466  
ATTACAAG 0.167918066258  
ATTACAAT 0.359442418607  
ATTACACA 0.338849371007  
ATTACACC 0.366878025289  
ATTACACG 0.280607153443  
ATTACAGA 0.347945026368  
ATTACAGC 0.218388817544  
ATTACAGG 0.213382840458  
ATTACATA 0.332306966124  
ATTACATC 0.242361948484  
ATTACATG 0.334145645349  
ATTACCAA 0.295045980852  
ATTACCAC 0.318758444351  
ATTACCAG 0.232282480787  
ATTACCCA 0.259112911192  
ATTACCCC 0.186722068557  
ATTACCCG 0.159053070475  
ATTACCGA 0.155421091628  
ATTACCGC 0.278487108565  
ATTACCGG 0.181304748732

ATTACCTA 0.279243232563  
ATTACCTC 0.299265904376  
ATTACCTG 0.144516438336  
ATTACGAA 0.391098859034  
ATTACGAC 0.37279357285  
ATTACGAG 0.355622516411  
ATTACGCA 0.370483634303  
ATTACGCC 0.237957084538  
ATTACGCG 0.303160026728  
ATTACGGA 0.346932430666  
ATTACGGC 0.312502723984  
ATTACGGG 0.251633664086  
ATTACGTA 0.375738215987  
ATTACGTC 0.345481091918  
ATTACGTG 0.350628027362  
ATTACTAA 0.117479996049  
ATTACTAC 0.0708453793965  
ATTACTAG 0.160346549869  
ATTACTCA 0.145771650226  
ATTACTCC 0.118555053535  
ATTACTCG 0.209331280055  
ATTACTGA 0.173846969843  
ATTACTGC 0.152662517289  
ATTACTGG 0.110041695117  
ATTACTTA 0.225523611934  
ATTACTTC 0.201675068644  
ATTACTTG 0.044122812795  
ATTAGAAA 0.270071790819  
ATTAGAAC -0.125953710537  
ATTAGAAG 0.0800647945026  
ATTAGAAT 0.184042526919  
ATTAGACA 0.0224920972044  
ATTAGACC -0.0491201782696  
ATTAGACG -0.0134445435329  
ATTAGAGA 0.0965830343004  
ATTAGAGC -0.00127409817965  
ATTAGAGG 0.0198436796304  
ATTAGATA 0.321812773058  
ATTAGATC 0.0678322897447  
ATTAGATG 0.0935757558148  
ATTAGCAA 0.129180770851  
ATTAGCAC -0.0428936701873  
ATTAGCAG 0.0264335420511  
ATTAGCCA -0.180548171261  
ATTAGCCC -0.133639261009  
ATTAGCCG -0.00743102872169  
ATTAGCGA 0.148822512458  
ATTAGCGC -0.0716896330321  
ATTAGCGG 0.14692419153  
ATTAGCTA -0.161182455794  
ATTAGCTC 0.0728803047268  
ATTAGCTG 0.0153400258597  
ATTAGGAA 0.0512277986344  
ATTAGGAC 0.0114107883817

ATTAGGAG -0.0661470515596  
ATTAGGCA 0.062333300405  
ATTAGGCC 0.0839289474984  
ATTAGGCG -0.0153912432634  
ATTAGGGA 0.0464442927084  
ATTAGGGC -0.0838868596535  
ATTAGGGG -0.0803175802304  
ATTAGGTA 0.122031787466  
ATTAGGTC -0.0786032862145  
ATTAGGTG -0.0544840410849  
ATTAGTAA 0.0626152604887  
ATTAGTAC -0.0303025313399  
ATTAGTAG 0.0409339392742  
ATTAGTCA 0.0632240349832  
ATTAGTCC -0.213261560242  
ATTAGTCG -0.0446277635074  
ATTAGTGA -0.0142998271178  
ATTAGTGC 0.0915650923249  
ATTAGTGG 0.190947098022  
ATTAGTTA -0.0807218274053  
ATTAGTTC -0.161496921203  
ATTAGTTG 0.0644966803713  
ATTATAAA 0.133655368791  
ATTATAAC 0.0430580254232  
ATTATAAG 0.237606753167  
ATTATAAT 0.235995079929  
ATTATAACA 0.228487453073  
ATTATAACC 0.0778605729856  
ATTATACG 0.165587726817  
ATTATAGA 0.145268984353  
ATTATAGC 0.104739006  
ATTATAGG 0.108853311638  
ATTATATA 0.296784853504  
ATTATATC 0.278059942179  
ATTATATG 0.139835671475  
ATTATCAA 0.187553934886  
ATTATCAC 0.135615184577  
ATTATCAG 0.210352116521  
ATTATCCA 0.103693275374  
ATTATCCC 0.21514244621  
ATTATCCG 0.271804221812  
ATTATCGA 0.145288689788  
ATTATCGC 0.211829568157  
ATTATCGG 0.191697402797  
ATTATCTA 0.21213080935  
ATTATCTC 0.0387561198844  
ATTATCTG 0.303172896721  
ATTATGAA 0.154049656415  
ATTATGAC 0.182558892621  
ATTATGAG 0.0752321675558  
ATTATGCA 0.0848220437474  
ATTATGCC 0.154360553804  
ATTATGCG 0.153227842543  
ATTATGGA 0.299171908823

ATTATGGC 0.103974837651  
ATTATGGG -0.03035026804  
ATTATGTA 0.193241613761  
ATTATGTC 0.162687954905  
ATTATGTG 0.0572487870206  
ATTATTAA 0.151314099397  
ATTATTAC 0.291553469993  
ATTATTAG 0.0702235846178  
ATTATTCA 0.194685882319  
ATTATTCC 0.28229047114  
ATTATTCCG 0.174065292323  
ATTATTGA 0.148755684047  
ATTATTGC 0.221322621417  
ATTATTGG 0.0500588897527  
ATTATTTA 0.207227637906  
ATTATTTTC 0.261542001524  
ATTATTTG 0.0981250960504  
ATTCAAAA 0.213842510264  
ATTCAAAC 0.259295686662  
ATTCAAAG -0.0155462807468  
ATTCAAAT 0.206916740517  
ATTCACA 0.110167072823  
ATTCACC -0.00906396641146  
ATTCACG 0.00471470284748  
ATTCAGA 0.0382472721684  
ATTCAGC 0.0504722880164  
ATTCAGG -0.0145059517929  
ATTCATA 0.0267122878084  
ATTCATC 0.129154620603  
ATTCATG 0.0456376649323  
ATTCACAA 0.20176514172  
ATTCACAC 0.0677945171647  
ATTCACAG 0.0902544512503  
ATTCACCA 0.166545917583  
ATTCACCC 0.00596047496601  
ATTCACCG 0.112722013656  
ATTCACGA 0.0618990890997  
ATTCACGC 0.100252785728  
ATTCACGG 0.0734044655206  
ATTCACTA 0.135477169381  
ATTCACTC 0.00536705026259  
ATTCACTG -0.0696166405971  
ATTCAGAA 0.05582932605  
ATTCAGAC -0.0351475883115  
ATTCAGAG -0.0736259273893  
ATTCAGCA 0.168706164181  
ATTCAGCC -0.205728995148  
ATTCAGCG -0.154334403556  
ATTCAGGA 0.14845640899  
ATTCAGGC -0.103778710793  
ATTCAGGG 0.0415643659291  
ATTCAGTA 0.0781543267806  
ATTCAGTC 0.0443337137984  
ATTCAGTG 0.0554254500022



ATTCATAA 0.149514808229  
ATTCATAC 0.039538674306  
ATTCATAG 0.127170181764  
ATTCATCA 0.0714697358888  
ATTCATCC -0.0824112494237  
ATTCATCG 0.00401987418825  
ATTCATGA 0.0315374651474  
ATTCATGC 0.0336510104165  
ATTCATGG 0.00648671422138  
ATTCATTA 0.223761773036  
ATTCATTC 0.182716139061  
ATTCATTG -0.00681067139518  
ATTCCAAA 0.243850029638  
ATTCCAAC 0.214574404719  
ATTCCAAG 0.255675330147  
ATTCCAAT 0.200882566028  
ATTCCACA 0.151328788777  
ATTCCACC 0.21780396031  
ATTCCACG 0.179183406881  
ATTCCAGA 0.166839999272  
ATTCCAGC -0.0192969457479  
ATTCCAGG 0.154827767898  
ATTCCATA 0.254410231477  
ATTCCATC 0.163861994775  
ATTCCATG 0.25931901086  
ATTCCCAA 0.35495016356  
ATTCCCAC 0.313596346791  
ATTCCCAG 0.327071317537  
ATTCCCCA 0.30868478782  
ATTCCCCC 0.38629291183  
ATTCCCCG 0.363951883544  
ATTCCCGA 0.381083201371  
ATTCCCGC 0.192467275871  
ATTCCCGG 0.30663101215  
ATTCCCTA 0.364733583613  
ATTCCCTC 0.379544556412  
ATTCCCTG 0.361807563233  
ATTCCGAA 0.18327515423  
ATTCCGAC 0.190245669499  
ATTCCGAG 0.304067816309  
ATTCCGCA 0.28437667979  
ATTCCGCC 0.16980065424  
ATTCCGCG 0.249055961712  
ATTCCGGA 0.213064501965  
ATTCCGGC 0.10334142054  
ATTCCGGG 0.223254562331  
ATTCCGTA 0.326735722691  
ATTCCGTC 0.254786221725  
ATTCCGTG 0.325345401188  
ATTCCTAA 0.243973523019  
ATTCCTAC 0.183925552701  
ATTCCTAG 0.183204330542  
ATTCCTCA 0.218572306747  
ATTCCTCC 0.220122615606

ATTCCTCG 0.235606160399  
ATTCCTGA 0.237284525338  
ATTCCTGC 0.199789345227  
ATTCCTGG 0.0359231763834  
ATTCCTTA 0.211989921944  
ATTCCTTC 0.194479392152  
ATTCCTTG 0.146358578008  
ATTCGAAA 0.228723462645  
ATTCGAAC 0.0867966365892  
ATTCGAAG 0.0784429954554  
ATTCGAAT 0.36395733544  
ATTCGACA 0.227315638104  
ATTCGACC -0.0382331149303  
ATTCGACG 0.194454694696  
ATTCGAGA 0.163855999303  
ATTCGAGC 0.210310461552  
ATTCGAGG 0.085442141143  
ATTCGATA 0.273056528119  
ATTCGATC 0.210191222639  
ATTCGATG 0.124191884706  
ATTCGCAA 0.333467803903  
ATTCGCAC 0.302260430506  
ATTCGCAG 0.253644426881  
ATTCGCCA 0.271632792411  
ATTCGCCC 0.280452095545  
ATTCGCCG 0.291650200883  
ATTCGCGA 0.277160310874  
ATTCGCGC 0.212872805934  
ATTCGCGG 0.22429601818  
ATTCGCTA 0.267323377023  
ATTCGCTC 0.269962018925  
ATTCGCTG 0.268679615727  
ATTCGGAA 0.249573989924  
ATTCGGAC -0.0349469004693  
ATTCGGAG 0.236123802233  
ATTCGGCA 0.173967428414  
ATTCGGCC 0.0207734662153  
ATTCGGCG 0.0631266669959  
ATTCGGGA 0.248817667687  
ATTCGGGC 0.179416672155  
ATTCGGGG 0.187751711443  
ATTCGGTA 0.202770473465  
ATTCGGTC 0.210454675185  
ATTCGGTG 0.160835034798  
ATTCGTAA 0.205553360118  
ATTCGTAC 0.15624764376  
ATTCGTAG 0.0511701683901  
ATTCGTCA 0.244785204771  
ATTCGTCC -0.072147875252  
ATTCGTCC 0.244593436288  
ATTCGTGA 0.0991459746646  
ATTCGTGC 0.0493353478709  
ATTCGTGG 0.131368541934  
ATTCGTTA 0.236826812721

ATTCGTTTC 0.138196795142  
ATTCGTTG 0.188063953105  
ATTCTAAA 0.232076184388  
ATTCTAAC 0.0813656721333  
ATTCTAAG 0.218733746895  
ATTCTACA 0.171140296079  
ATTCTACC 0.100740923685  
ATTCTACG 0.134761465674  
ATTCTAGA 0.168948549913  
ATTCTAGC 0.10538113986  
ATTCTAGG 0.180193308305  
ATTCTATA 0.340108471544  
ATTCTATC 0.325218446069  
ATTCTATG 0.2268199846  
ATTCTCAA 0.339146475585  
ATTCTCAC 0.310820391382  
ATTCTCAG 0.34058651123  
ATTCTCCA 0.270022393466  
ATTCTCCC 0.239383725829  
ATTCTCCG 0.376466229861  
ATTCTCGA 0.319154480783  
ATTCTCGC 0.230266006131  
ATTCTCGG 0.283234785641  
ATTCTCTA 0.372659916029  
ATTCTCTC 0.235446991152  
ATTCTCTG 0.341796812575  
ATTCTGAA 0.273521421411  
ATTCTGAC 0.170964236317  
ATTCTGAG 0.263617203451  
ATTCTGCA 0.321412105644  
ATTCTGCC 0.130023389944  
ATTCTGCG 0.205373875903  
ATTCTGGA 0.209552104369  
ATTCTGGC 0.102285636669  
ATTCTGGG 0.144992206196  
ATTCTGTA 0.344638472826  
ATTCTGTC 0.320166194648  
ATTCTGTG 0.317114535994  
ATTCTTAA 0.299339722058  
ATTCTTAC 0.139876222161  
ATTCTTAG 0.244102392748  
ATTCTTCA 0.272328484639  
ATTCTTCC 0.290827074223  
ATTCTTCG 0.22713088199  
ATTCTTGA 0.252369240049  
ATTCTTGC 0.142818722694  
ATTCTTGG 0.257808028126  
ATTCTTTA 0.203935612279  
ATTCTTTC 0.222864387802  
ATTCTTTG 0.331476507799  
ATTGAAAA 0.201817442215  
ATTGAAAC -0.169108850033  
ATTGAAAG 0.104837795825  
ATTGAAAT 0.239531882841

ATTGAACA -0.0255631298162  
ATTGAACC -0.0459560034249  
ATTGAACG -0.0623381184424  
ATTGAAGA 0.165423005223  
ATTGAAGC -0.0910551269521  
ATTGAAGG 0.0257071462816  
ATTGAATA 0.12096668749  
ATTGAATC 0.136360466637  
ATTGAATG 0.0174167572374  
ATTGACAA 0.138902610376  
ATTGACAC 0.0386369909782  
ATTGACAG 0.125786171698  
ATTGACCA -0.0948149869975  
ATTGACCC -0.238896684767  
ATTGACCG -0.0503166919142  
ATTGACGA -0.0508325125872  
ATTGACGC 0.00300774989572  
ATTGACGG -0.0108102218413  
ATTGACTA -0.166488313769  
ATTGACTC -0.100178370517  
ATTGACTG -0.0906815534037  
ATTGAGAA 0.194683198314  
ATTGAGAC -0.131982497632  
ATTGAGAG -0.00776542279957  
ATTGAGCA 0.00492052514874  
ATTGAGCC -0.269694522084  
ATTGAGCG -0.0783950563482  
ATTGAGGA 0.00464457455  
ATTGAGGC -0.198498913688  
ATTGAGGG -0.114885332807  
ATTGAGTA -0.0153810268653  
ATTGAGTC 0.180031394762  
ATTGAGTG 0.12702773379  
ATTGATAA 0.159792201805  
ATTGATAC 0.128185814482  
ATTGATAG 0.145695446014  
ATTGATCA -0.133965501553  
ATTGATCC -0.0441173242003  
ATTGATCG -0.0417132429018  
ATTGATGA 0.00476079787311  
ATTGATGC 0.065189526204  
ATTGATGG -0.13639295489  
ATTGATTA 0.096606278965  
ATTGATTC 0.256285502593  
ATTGATTG 0.0839837318053  
ATTGCAAA 0.224254173664  
ATTGCAAC 0.115709181321  
ATTGCAAG 0.117100291416  
ATTGCAAT 0.347262312523  
ATTGCACA 0.286852958609  
ATTGCACC 0.218484489231  
ATTGCACG 0.218492583499  
ATTGCAGA 0.224055358967  
ATTGCAGC 0.186881160948

ATTGCAGG 0.210119870908  
ATTGCATA 0.247231003974  
ATTGCATC 0.218472139893  
ATTGCATG 0.191379064304  
ATTGCCAA 0.0287361401776  
ATTGCCAC 0.0246777963533  
ATTGCCAG 0.188374058706  
ATTGCCCA 0.111605084634  
ATTGCCCC 0.183547135821  
ATTGCCCG 0.264124898461  
ATTGCCGA 0.202656754265  
ATTGCCGC 0.139504307527  
ATTGCCGG 0.0378960021076  
ATTGCCTA 0.115516129407  
ATTGCCTC 0.155856879405  
ATTGCCTG 0.148540582669  
ATTGCGAA 0.326343607983  
ATTGCGAC 0.367272058662  
ATTGCGAG 0.277275434748  
ATTGCGCA 0.336840545347  
ATTGCGCC 0.220593320065  
ATTGCGCG 0.37225570265  
ATTGCGGA 0.380908472195  
ATTGCGGC 0.170538870228  
ATTGCGGG 0.327375463786  
ATTGCGTA 0.341536038113  
ATTGCGTC 0.270560275747  
ATTGCGTG 0.391907615974  
ATTGCTAA 0.27816454317  
ATTGCTAC 0.160104891549  
ATTGCTAG 0.192287426727  
ATTGCTCA 0.0971990179129  
ATTGCTCC 0.212001809592  
ATTGCTCG 0.051639443237  
ATTGCTGA 0.11820720353  
ATTGCTGC 0.0238136402555  
ATTGCTGG 0.208017956503  
ATTGCTTA 0.236675722401  
ATTGCTTC 0.19996871501  
ATTGCTTG 0.0823755735581  
ATTGAAA -0.0487064660235  
ATTGAAAC -0.0298305121957  
ATTGAAAG -0.100597477491  
ATTGACA -0.121142302619  
ATTGACC -0.0728298963176  
ATTGACG -0.121780939208  
ATTGAGA 0.172627280511  
ATTGAGC -0.0228189967022  
ATTGAGG -0.070455892522  
ATTGATA 0.282378314011  
ATTGATC 0.114777817933  
ATTGATG 0.0780366975143  
ATTGCAA -0.0438906999462  
ATTGCAC -0.0871777141164

ATTGGCAG -0.227672967417  
ATTGGCCA -0.20709370849  
ATTGGCCC -0.174906570521  
ATTGGCCG -0.14047760162  
ATTGGCGA 0.0312791686275  
ATTGGCGC -0.0230736030909  
ATTGGCGG 0.0135019429625  
ATTGGCTA -0.0350953463097  
ATTGGCTC -0.16269725986  
ATTGGCTG 0.105389856609  
ATTGGGAA 0.112874625927  
ATTGGGAC -0.110246904254  
ATTGGGAG 0.0744599247454  
ATTGGGCA -0.182358977736  
ATTGGGCC -0.271257559731  
ATTGGGCG -0.173410816981  
ATTGGGGA -0.0153698354467  
ATTGGGGC -0.0173361614342  
ATTGGGGG -0.166625943563  
ATTGGGTA 0.250424941525  
ATTGGGTC 0.00795403367571  
ATTGGGTG -0.0281666831341  
ATTGGTAA 0.0145213869406  
ATTGGTAC 0.0734895387385  
ATTGGTAG -0.00990026934556  
ATTGGTCA -0.00771287028024  
ATTGGTCC -0.149765374166  
ATTGGTCG 0.0601034387576  
ATTGGTGA 0.0105161474456  
ATTGGTGC -0.0578312727907  
ATTGGTGG -0.104978212432  
ATTGGTTA -0.0639476168522  
ATTGGTTC -0.0859212057345  
ATTGGTTG 0.143732573712  
ATTGTAAG 0.224388011564  
ATTGTAAC -0.0365998221871  
ATTGTAAG -0.00121165909315  
ATTGTACA 0.0682692132693  
ATTGTACC 0.0656589136025  
ATTGTACG 0.1115364772  
ATTGTAGA 0.122294538957  
ATTGTAGC 0.0749604821182  
ATTGTAGG 0.0979439724253  
ATTGTATA 0.160104891549  
ATTGTATC 0.136183226069  
ATTGTATG 0.183418946952  
ATTGTCAA 0.113429604986  
ATTGTCAC 0.0322550989045  
ATTGTCAG 0.113563261808  
ATTGTCCA 0.171953859341  
ATTGTCCC -0.00367701538506  
ATTGTCCG 0.0951571384663  
ATTGTCEG 0.115214616099  
ATTGTCGC 0.111585874553

ATTGTCGG 0.0287609140964  
ATTGTCTA 0.143441372597  
ATTGTCTC 0.186882594093  
ATTGTCTG 0.00461248031258  
ATTGTGAA 0.164987156688  
ATTGTGAC 0.15095282004  
ATTGTGAG 0.0763436079826  
ATTGTGCA 0.133961565063  
ATTGTGCC 0.121077099647  
ATTGTGCG 0.141965903743  
ATTGTGGA 0.0892464370288  
ATTGTGGC 0.0395947221673  
ATTGTGGG 0.230781685657  
ATTGTGTA 0.253742034283  
ATTGTGTC 0.19456244923  
ATTGTGTG 0.172183400404  
ATTGTTAA 0.21022861704  
ATTGTTAC 0.0103308006334  
ATTGTTAG 0.10961115776  
ATTGTTCA 0.10083971351  
ATTGTTCC 0.182155480911  
ATTGTTCG 0.141460295506  
ATTGTTGA -0.0943131734839  
ATTGTTGC 0.134681881051  
ATTGTTGG 0.0451919864019  
ATTGTTTA 0.0457062746067  
ATTGTTTC 0.119656269522  
ATTGTTTG 0.159248830929  
ATTTAAAA 0.158606665349  
ATTTAAAC 0.024221168412  
ATTTAAAG 0.206937079598  
ATTTAAAT 0.247796966255  
ATTTAACA 0.187309271334  
ATTTAACC 0.0545741141604  
ATTTAACG 0.171425043221  
ATTTAAGA 0.250491769936  
ATTTAAGC 0.0187773306408  
ATTTAAGG 0.0979236639336  
ATTTAATA -0.00907849432685  
ATTTAATC 0.0578603286214  
ATTTAATG 0.213344420295  
ATTTACAA 0.283112751151  
ATTTACAC 0.163250016466  
ATTTACAG 0.135831741641  
ATTTACCA 0.0600287602362  
ATTTACCC 0.0502798888245  
ATTTACCG 0.113419065183  
ATTTACGA 0.201146018573  
ATTTACGC 0.151142176557  
ATTTACGG 0.0606758386239  
ATTTACTA 0.237808899801  
ATTTACTC 0.184000406782  
ATTTACTG 0.139012027067  
ATTTAGAA 0.303027617567

ATTTAGAC 0.144467043424  
ATTTAGAG -0.0340406747012  
ATTTAGCA 0.160654046751  
ATTTAGCC -0.0778607340241  
ATTTAGCG 0.205792279866  
ATTTAGGA 0.168048755684  
ATTTAGGC -0.0447711893707  
ATTTAGGG 0.0795846231531  
ATTTAGTA 0.234132472722  
ATTTAGTC 0.0380112625963  
ATTTAGTG 0.0973762584807  
ATTTATAA 0.19474906145  
ATTTATAC 0.17412978331  
ATTTATAG 0.151547949385  
ATTTATCA 0.0796928798687  
ATTTATCC -0.0337759504889  
ATTTATCG 0.1841689306  
ATTTATGA 0.0818267140881  
ATTTATGC 0.121347318873  
ATTTATGG 0.0481036979645  
ATTTATTA 0.244090770415  
ATTTATTC 0.0371879733913  
ATTTATTG 0.182335507678  
ATTTCAAA 0.357428849534  
ATTTCAAC 0.128936701873  
ATTTCAAG 0.235063123792  
ATTTCACA 0.261779960194  
ATTTCACC 0.107201859536  
ATTTCACG 0.183875127724  
ATTTCAGA 0.285454651112  
ATTTCAGC 0.222606423851  
ATTTCAGG 0.201264023359  
ATTTCATA 0.345623048383  
ATTTCATC 0.261136358647  
ATTTCATG 0.345477448995  
ATTTCCAA 0.336125114407  
ATTTCCAC 0.332016619935  
ATTTCCAG 0.34821384471  
ATTTCCCA 0.325854489776  
ATTTCCCC 0.302084019408  
ATTTCCCG 0.309411293332  
ATTTCCGA 0.332641770401  
ATTTCCGC 0.316747780861  
ATTTCCGG 0.328305780588  
ATTTCCTA 0.334250696147  
ATTTCCTC 0.233659718629  
ATTTCCTG 0.361174146122  
ATTTCGAA 0.359741693664  
ATTTCGAC 0.160099080383  
ATTTCGAG 0.225323278228  
ATTTCGCA 0.210909011666  
ATTTCGCC 0.211656011045  
ATTTCGCG 0.318225976421  
ATTTCGGA 0.296054798129



ATTTCGGC 0.31283031216  
ATTTCGGG 0.226250850732  
ATTTCGTA 0.413451396859  
ATTTCGTC 0.310329347842  
ATTTCGTG 0.35192594788  
ATTTCTAA 0.326615140993  
ATTTCTAC 0.245835467491  
ATTTCTAG 0.222903563805  
ATTTCTCA 0.171488966048  
ATTTCTCC 0.265963999826  
ATTTCTCG 0.234159915695  
ATTTCTGA 0.197380616855  
ATTTCTGC 0.184147840787  
ATTTCTGG 0.206370490898  
ATTTCTTA 0.314946319353  
ATTTCTTC 0.169609053797  
ATTTCTTG 0.183050281115  
ATTTGAAA 0.205800346879  
ATTTGAAC 0.133389316999  
ATTTGAAG 0.206248456409  
ATTTGACA 0.218193308442  
ATTTGACC 0.0918062557204  
ATTTGACG 0.203561000241  
ATTTGAGA 0.128149081209  
ATTTGAGC 0.0692327807883  
ATTTGAGG 0.156780904508  
ATTTGATA 0.197421295018  
ATTTGATC 0.172115377115  
ATTTGATG 0.110064939782  
ATTTGCAA 0.302203339591  
ATTTGCAC 0.247396760934  
ATTTGCAG 0.273006619899  
ATTTGCCA 0.322445629277  
ATTTGCCC 0.220229862346  
ATTTGCCG 0.221918265948  
ATTTGCGA 0.330517339067  
ATTTGCGC 0.275159718106  
ATTTGCGG 0.136583679115  
ATTTGCTA 0.156811894882  
ATTTGCTC 0.309210698357  
ATTTGCTG 0.260631729724  
ATTTGGAA 0.214341958072  
ATTTGGAC 0.0924542007467  
ATTTGGAG 0.0761597400602  
ATTTGGCA 0.163974510966  
ATTTGGCC 0.0786405848647  
ATTTGGCG 0.133615899437  
ATTTGGGA 0.206745311115  
ATTTGGGC 0.0944329028228  
ATTTGGGG 0.17473096613  
ATTTGGTA 0.118808865178  
ATTTGGTC 0.18254470966  
ATTTGGTG 0.254684515577  
ATTTGTAA 0.301148214011

ATTTGTAC 0.246314408659  
ATTTGTAG 0.121444189934  
ATTTGTCA 0.159796899743  
ATTTGTCC 0.138382752459  
ATTTGTCCG 0.181350515015  
ATTTGTGA 0.262285531649  
ATTTGTGC 0.074127235483  
ATTTGTGG 0.118659654526  
ATTTGTGA 0.179499658594  
ATTTGTTC 0.107737567736  
ATTTGTTG 0.192089837318  
ATTTTAAA 0.237074359481  
ATTTTAAC 0.202962743419  
ATTTTAAG 0.224974752464  
ATTTTACA 0.277069749061  
ATTTTACC 0.100113879522  
ATTTTACG 0.271046016378  
ATTTTAGA 0.237596102096  
ATTTTAGC 0.0987854662734  
ATTTTAGG 0.202199828756  
ATTTTATA 0.331328308421  
ATTTTATC 0.220546830735  
ATTTTATG 0.12225095521  
ATTTTCAA 0.205289613993  
ATTTTCAC 0.325205933201  
ATTTTCAG 0.238503902005  
ATTTTCCA 0.289103403141  
ATTTTCCC 0.289807214563  
ATTTTCCG 0.31969895288  
ATTTTCGA 0.322249116336  
ATTTTCGC 0.234101375794  
ATTTTCGG 0.280500631964  
ATTTTCTA 0.380220243197  
ATTTTCTC 0.354314811878  
ATTTTCTG 0.277602142747  
ATTTTGAA 0.281713100178  
ATTTTGAC 0.181861897636  
ATTTTGAG 0.151965465762  
ATTTTGCA 0.223572416518  
ATTTTGCC 0.26549620095  
ATTTTGCG 0.310255729527  
ATTTTGGA 0.244558569291  
ATTTTGGC 0.211434922203  
ATTTTGGG 0.26030483655  
ATTTTGTA 0.249747940668  
ATTTTGTC 0.316721630613  
ATTTTGTG 0.35687678875  
ATTTTTAA 0.201370454244  
ATTTTTAC 0.278888033356  
ATTTTTAG 0.232986321457  
ATTTTTCA 0.156039980823  
ATTTTTCC 0.274981345078  
ATTTTTCCG 0.179762453621  
ATTTTTGA 0.203923989947

ATTTTTGC 0.112798853981  
ATTTTTGG 0.272693330234  
ATTTTTTA 0.303683944763  
ATTTTTTC 0.313461876221  
ATTTTTTG 0.329856714602  
CAAAAAAA 0.217952145047  
CAAAAAAC 0.102565669224  
CAAAAAAG -0.023224988474  
CAAAAACA -0.00336725284858  
CAAAAACC 0.186597998053  
CAAAAACG -0.00673078319992  
CAAAAAGA -0.0455086949574  
CAAAAAGC -0.319964706096  
CAAAAAGG -0.000354463626802  
CAAAAATA 0.142171632792  
CAAAAATC 0.394666802261  
CAAAAATG -0.0246370846025  
CAAAACAA 0.0623641707004  
CAAAACAC -0.00998018490217  
CAAAACAG 0.0594716678742  
CAAAACCA -0.143327570594  
CAAAACCC -0.0172923221741  
CAAAACCG -0.107940958552  
CAAAACGA 0.0938988781312  
CAAAACGC -0.0954473353941  
CAAAACGG 0.0173390670173  
CAAAACTA -0.00585084195043  
CAAAACTC -0.052023012218  
CAAAACTG -0.0660377358491  
CAAAAGAA 0.0504627141052  
CAAAAGAC -0.10642971072  
CAAAAGAG -0.0200413778722  
CAAAAGCA -0.0924489885519  
CAAAAGCC 0.0136257318437  
CAAAAGCG -0.112176656518  
CAAAAGGA -0.0105254746996  
CAAAAGGC -0.204325191159  
CAAAAGGG -0.0184896779161  
CAAAAGTA 0.0499311181365  
CAAAAGTC -0.170471259069  
CAAAAGTG -0.131617941426  
CAAAATAA 0.152495115151  
CAAAATAC 0.241344486158  
CAAAATAG 0.17140606819  
CAAAATCA 0.317224296486  
CAAAATCC 0.416699598235  
CAAAATCG 0.407930789011  
CAAAATGA 0.0718285983199  
CAAAATGC 0.0431485872357  
CAAAATGG -0.0469353362486  
CAAAATTA 0.131066494269  
CAAAATTC 0.192940885912  
CAAAATTG 0.0295615710553  
CAAACAAA 0.116399110892

CAAACAAC 0.0385710992557  
CAAACAAG 0.112825243706  
CAAACACA 0.0624511498845  
CAAACACC -0.0687220438517  
CAAACACG -0.0113913384568  
CAAACAGA 0.00665492107401  
CAAACAGC 0.0293972367905  
CAAACAGG -0.167039780521  
CAAACATA 0.0825749530772  
CAAACATC -0.164673633567  
CAAACATG -0.129202476209  
CAAACCAA 0.1437970647  
CAAACCAC -0.104192509144  
CAAACCAG 0.0315825581076  
CAAACCCA -0.0983446398384  
CAAACCCC -0.264463338049  
CAAACCCG -0.116140662814  
CAAACCGA 0.0325381720977  
CAAACCGC -0.129619569691  
CAAACCGG 0.0324974939346  
CAAACCTA 0.0555955860562  
CAAACCTC -0.0924187138309  
CAAACCTG -0.180730784091  
CAAACGAA 0.0654954005576  
CAAACGAC 0.0309721398933  
CAAACGAG 0.106659596415  
CAAACGCA -0.137312517975  
CAAACGCC -0.233345402876  
CAAACGCG -0.1833314128  
CAAACGGA 0.0261023055802  
CAAACGGC -0.0941992778147  
CAAACGGG 0.00832594830968  
CAAACGTA 0.0594716240245  
CAAACGTC -0.101981607659  
CAAACGTG -0.0308362971745  
CAAACCTAA 0.117049961501  
CAAACCTAC 0.0539583744978  
CAAACCTAG -0.116384582976  
CAAACCTCA 0.087799456656  
CAAACCTCC -0.139754548466  
CAAACCTCG -0.126096382911  
CAAACCTGA -0.0662279185394  
CAAACCTGC -0.143508685272  
CAAACCTGG -0.0819160437727  
CAAACCTTA 0.0782851248674  
CAAACCTTC -0.0664142037815  
CAAACCTTG -0.12600787413  
CAAAGAAA 0.0104552564419  
CAAAGAAC 0.00279643899976  
CAAAGAAG -0.0716170006304  
CAAAGACA 0.00414114470131  
CAAAGACC -0.103550622521  
CAAAGACG -0.049169707393  
CAAAGAGA -0.153853852293

CAAAGAGC -0.164671893746  
CAAAGAGG -0.134786852954  
CAAAGATA 0.169789677051  
CAAAGATC 0.356083558366  
CAAAGATG -0.0216887248849  
CAAAGCAA 0.164875160526  
CAAAGCAC -0.0705042722379  
CAAAGCAG -0.0642674086147  
CAAAGCCA -0.192723387885  
CAAAGCCC -0.305708131727  
CAAAGCCG -0.070191468695  
CAAAGCGA -0.00109814767472  
CAAAGCGC -0.219750464998  
CAAAGCGG 0.017876988047  
CAAAGCTA 0.0809883598489  
CAAAGCTC -0.280681854491  
CAAAGCTG -0.194477850399  
CAAAGGAA 0.0939866956464  
CAAAGGAC 0.0612220882426  
CAAAGGAG -0.087416666667  
CAAAGGCA -0.214930256855  
CAAAGGCC -0.34257430631  
CAAAGGCG -0.208310700706  
CAAAGGGA -0.0907774281738  
CAAAGGGC -0.251170428169  
CAAAGGGG -0.0105283802827  
CAAAGGTA -0.137168218732  
CAAAGGTC -0.122231618192  
CAAAGGTG -0.224187734545  
CAAAGTAA 0.0788531663592  
CAAAGTAC -0.119436632812  
CAAAGTAG -0.246585110122  
CAAAGTCA -0.207747460897  
CAAAGTCC -0.253169521463  
CAAAGTCG -0.263494613193  
CAAAGTGA 0.0195763659872  
CAAAGTGC -0.160542302563  
CAAAGTGG -0.0218372837627  
CAAAGTTA 0.0378603262421  
CAAAGTTC -0.0675152034073  
CAAAGTTG -0.0796429825717  
CAAATAAA 0.199800967559  
CAAATAAC 0.0826304243604  
CAAATAAG 0.040606976305  
CAAATACA 0.169841818701  
CAAATACC 0.138716894513  
CAAATACG 0.266309764212  
CAAATAGA 0.12737640376  
CAAATAGC -0.025236441823  
CAAATAGG -0.0678445190893  
CAAATATA 0.238189024993  
CAAATATC 0.362354277811  
CAAATATG 0.168551421557  
CAAATCAA 0.254294825353

CAAATCAC 0.224645436782  
CAAATCAG 0.280706928363  
CAAATCCA 0.380133075705  
CAAATCCC 0.32536574027  
CAAATCCG 0.383134097346  
CAAATCGA 0.246215613954  
CAAATCGC 0.347108688136  
CAAATCGG 0.248661252597  
CAAATCTA 0.422368631325  
CAAATCTC 0.456573155318  
CAAATCTG 0.425140557581  
CAAATGAA 0.181074939485  
CAAATGAC -0.0463237392698  
CAAATGAG 0.0380878357764  
CAAATGCA -0.0449478354092  
CAAATGCC -0.0542812720187  
CAAATGCG 0.127727979312  
CAAATGGA -0.0923272015246  
CAAATGGC -0.10078808434  
CAAATGGG 0.0190389945391  
CAAATGTA -0.1465162866  
CAAATGTC 0.0482914004698  
CAAATGTG -0.00898482952425  
CAAATTAA -0.0382198291949  
CAAATTAC 0.284588787355  
CAAATTAG 0.0934460690685  
CAAATTCA 0.169805180655  
CAAATTCC 0.146435284972  
CAAATTCT 0.142341214955  
CAAATTGA 0.00243968034424  
CAAATTGC 0.117148565281  
CAAATTGG -0.120586056107  
CAAATTTA -0.0171491141408  
CAAATTTT 0.234888788808  
CAAATTTG 0.207498170685  
CAACAAAA 0.179720345175  
CAACAAAC 0.0611895980153  
CAACAAAG 0.0607971634943  
CAACAACA -0.0107795999912  
CAACAACC -0.0919500965802  
CAACAACG 0.0292374297212  
CAACAAGA -0.0700724942978  
CAACAAGC -0.179972922641  
CAACAAGG 0.0183400424775  
CAACAATA 0.0954178954862  
CAACAATC 0.158608433845  
CAACAATG -0.0318873214882  
CAACACAA 0.0628724594308  
CAACACAC -0.115601851852  
CAACACAG 0.0103065377877  
CAACACCA -0.106649060573  
CAACACCC -0.244458161866  
CAACACCG -0.0138386086431  
CAACACGA 0.1145380569

CAACACGC -0.136210454675  
CAACACGG 0.00603745417023  
CAACACTA 0.00827405651057  
CAACACTC 0.0178548080136  
CAACACTG -0.0871834730435  
CAACAGAA -0.0132557048306  
CAACAGAC -0.162927798904  
CAACAGAG -0.0454263540363  
CAACAGCA -0.0866264901535  
CAACAGCC -0.225651408161  
CAACAGCG -0.115554128521  
CAACAGGA 0.0016029440822  
CAACAGGC -0.259161596024  
CAACAGGG -0.032869237787  
CAACAGTA 0.0517731320733  
CAACAGTC -0.169771306389  
CAACAGTG -0.28719383166  
CAACATAA 0.00945410437112  
CAACATAC 0.0969999341369  
CAACATAG -0.105398573359  
CAACATCA 0.0840309154039  
CAACATCC 0.123971060393  
CAACATCG 0.0348795318987  
CAACATGA 0.0316275671642  
CAACATGC -0.106242053783  
CAACATGG -0.124282437134  
CAACATTA -0.0917295391682  
CAACATTC -0.136682473819  
CAACATTG 0.00385716153589  
CAACCAA 0.0503406796159  
CAACCAAC -0.0175569857481  
CAACCAAG -0.127564286939  
CAACCACA -0.0476239594381  
CAACCACC -0.184443840759  
CAACCACG 0.032773524327  
CAACCAGA 0.042704011065  
CAACCAGC -0.358527857892  
CAACCAGG -0.0421777668011  
CAACCATA -0.0852919384598  
CAACCATC -0.131717376272  
CAACCATG -0.22636882716  
CAACCCAA 0.0512007322069  
CAACCCAC -0.0711606351605  
CAACCCAG -0.286668486959  
CAACCCCA -0.0728618540526  
CAACCCCC -0.271723691205  
CAACCCCG -0.19700462963  
CAACCCGA 0.0310254932631  
CAACCCGC -0.108432002092  
CAACCCGG -0.129392303067  
CAACCCTA -0.0144624470351  
CAACCCTC -0.176926790995  
CAACCCTG -0.126456934018  
CAACCGAA -0.0245914023797

CAACCGAC -0.080000878045  
CAACCGAG -0.111391647442  
CAACCGCA 0.0154256694528  
CAACCGCC -0.200046766028  
CAACCGCG -0.0616637368704  
CAACCGGA 0.0248331467211  
CAACCGGC -0.137017128412  
CAACCGGG -0.182936331561  
CAACCGTA -0.0537467752806  
CAACCGTC -0.0137216160853  
CAACCGTG 0.0256658243118  
CAACCTAA -0.201247249521  
CAACCTAC -0.296802976426  
CAACCTAG -0.275127702884  
CAACCTCA -0.0680821698894  
CAACCTCC -0.355004777796  
CAACCTCG -0.100025792573  
CAACCTGA 0.0455224044436  
CAACCTGC -0.236726619593  
CAACCTGG -0.238935186933  
CAACCTTA -0.110002469746  
CAACCTTC -0.237325583813  
CAACCTTG -0.266714410365  
CAACGAAA -0.018187497276  
CAACGAAC -0.198387799564  
CAACGAAG -0.164463918993  
CAACGACA 0.0161419667892  
CAACGACC -0.165670683524  
CAACGACG 0.0817635952491  
CAACGAGA 0.125204480409  
CAACGAGC -0.201196159122  
CAACGAGG -0.169523945078  
CAACGATA 0.130026295527  
CAACGATC 0.177007179082  
CAACGATG -0.0903852132052  
CAACGCAA 0.149057864687  
CAACGCAC -0.108220922677  
CAACGCAG -0.0854231064215  
CAACGCCA 0.132147371174  
CAACGCCC -0.217853304285  
CAACGCCG -0.230054096166  
CAACGCGA 0.0065445026178  
CAACGCGC 0.0220156029811  
CAACGCGG -0.157738959696  
CAACGCTA -0.0582787863997  
CAACGCTC -0.216392156863  
CAACGCTG -0.156541709883  
CAACGGAA 0.0679053887188  
CAACGGAC -0.103644615672  
CAACGGAG -0.0792917819044  
CAACGGCA -0.167905811154  
CAACGGCC -0.277255360624  
CAACGGCG -0.120176119047  
CAACGGGA 0.106912336165



CAACGGGC -0.208649382716  
CAACGGGG 0.0123026850205  
CAACGGTA 0.129277079423  
CAACGGTC -0.253959681003  
CAACGGTG -0.177335023153  
CAACGTAA 0.152275571363  
CAACGTAC -0.158799124925  
CAACGTAG 0.122284369416  
CAACGTCA -0.0550157627882  
CAACGTCC -0.138674139088  
CAACGTCCG -0.142006264128  
CAACGTGA -0.106795397304  
CAACGTGC -0.254798394643  
CAACGTGG -0.125200788923  
CAACGTTA -0.0793458692836  
CAACGTTC -0.220764714597  
CAACGTTG 0.126016223666  
CAACTAAA 0.0547978440574  
CAACTAAC 0.0932881030901  
CAACTAAG -0.301927764044  
CAACTACA -0.0618482293793  
CAACTACC -0.0711201950035  
CAACTACG 0.0171385817849  
CAACTAGA 0.0135568289095  
CAACTAGC -0.192883093505  
CAACTAGG 0.0221794111836  
CAACTATA -0.0789291711943  
CAACTATC -0.122939610437  
CAACTATG 0.0484200582831  
CAACTCAA -0.0988248918747  
CAACTCAC -0.0427327208667  
CAACTCAG 0.104936442073  
CAACTCCA -0.0654697224143  
CAACTCCC -0.115333750384  
CAACTCCG -0.157799725652  
CAACTCGA -0.0706297851321  
CAACTCGC -0.210178861411  
CAACTCGG -0.189863341623  
CAACTCTA 0.0845744402671  
CAACTCTC -0.032212746793  
CAACTCTG -0.086822007187  
CAACTGAA -0.0106199061497  
CAACTGAC -0.179528120713  
CAACTGAG -0.0566640326617  
CAACTGCA 0.123089128717  
CAACTGCC -0.194445977947  
CAACTGCG 0.0109311764415  
CAACTGGA -0.133000790202  
CAACTGGC -0.112033058395  
CAACTGGG -0.177499675114  
CAACTGTA -0.128800108138  
CAACTGTC -0.12960757199  
CAACTGTG -0.190241011458  
CAACTTAA -0.153249703674

CAACTTAC 0.0213654102653  
CAACTTAG 0.124309560821  
CAACTTCA -0.0438538716547  
CAACTTCC -0.0647224417226  
CAACTTCG 0.0744033897561  
CAACTTGA -0.0770214494281  
CAACTTGC 0.0505992765098  
CAACTTGG -0.162740740741  
CAACTTTA 0.0122717301294  
CAACTTTC 0.101270060814  
CAAGAAAA -0.01859718449  
CAAGAAAC 0.107546268853  
CAAGAAAG -0.0967324135357  
CAAGAACA -0.0503401906549  
CAAGAACC -0.230189068368  
CAAGAACG -0.171164386944  
CAAGAAGA -0.0659276273903  
CAAGAAGC -0.160516078767  
CAAGAAGG -0.269646893585  
CAAGAATA 0.163181904029  
CAAGAATC 0.387831271109  
CAAGAATG -0.0622943063477  
CAAGACAA -0.104966803059  
CAAGACAC -0.215796879629  
CAAGACAG -0.212946637348  
CAAGACCA -0.235631758258  
CAAGACCC -0.33620374189  
CAAGACCG -0.147373360056  
CAAGACGA 0.212224746976  
CAAGACGC -0.152526590722  
CAAGACGG -0.101701402608  
CAAGACTA -0.108197099159  
CAAGACTC 0.000450064765417  
CAAGACTG -0.0468396671716  
CAAGAGAA 0.196277075636  
CAAGAGAC -0.178416218085  
CAAGAGAG -0.0465986114541  
CAAGAGCA -0.10984840608  
CAAGAGCC -0.0725795206972  
CAAGAGCG -0.0414350674822  
CAAGAGGA 0.0347807518325  
CAAGAGGC -0.26014859825  
CAAGAGGG -0.240287516666  
CAAGAGTA -0.0907253788154  
CAAGAGTC -0.312139267452  
CAAGAGTG -0.128011702533  
CAAGATAA 0.10098208708  
CAAGATAC 0.279004256679  
CAAGATAG 0.0031859718449  
CAAGATCA 0.165220907834  
CAAGATCC 0.339466837911  
CAAGATCG 0.30103569782  
CAAGATGA 0.0707143562889  
CAAGATGC -0.0755582351488

CAAGATGG -0.0682055165904  
CAAGATTA 0.312180204262  
CAAGATTC 0.402154610951  
CAAGATTG 0.298204349658  
CAAGCAAA 0.0812215630103  
CAAGCAAC -0.137365798382  
CAAGCAAG -0.0874509416587  
CAAGCACA -0.112617432723  
CAAGCACC -0.18342594556  
CAAGCACG -0.149853718343  
CAAGCAGA 0.210696904101  
CAAGCAGC -0.0138079401144  
CAAGCAGG -0.170395614165  
CAAGCATA 0.114016021133  
CAAGCATC -0.0638515664449  
CAAGCATG -0.111240067606  
CAAGCCAA -0.0537901039805  
CAAGCCAC -0.211056556399  
CAAGCCAG -0.149069189114  
CAAGCCCA -0.232063100137  
CAAGCCCC -0.257303444757  
CAAGCCCG -0.365758114425  
CAAGCCGA -0.158478896736  
CAAGCCGC -0.170445004198  
CAAGCCGG -0.176987654321  
CAAGCCTA -0.113027409917  
CAAGCCTC -0.260038454724  
CAAGCCTG -0.18800259909  
CAAGCGAA 0.0609149035427  
CAAGCGAC -0.236550732748  
CAAGCGAG -0.0972277097326  
CAAGCGCA -0.111532863256  
CAAGCGCC -0.315531637098  
CAAGCGCG -0.137074238419  
CAAGCGGA 0.0118388987684  
CAAGCGGC -0.112724359502  
CAAGCGGG -0.197041280502  
CAAGCGTA -0.213706447188  
CAAGCGTC -0.235701160956  
CAAGCGTG -0.143172313873  
CAAGCTAA -0.105201776528  
CAAGCTAC -0.248239012162  
CAAGCTAG -0.159858925791  
CAAGCTCA -0.135096644605  
CAAGCTCC -0.218351093956  
CAAGCTCG -0.109961098086  
CAAGCTGA -0.0979987049475  
CAAGCTGC -0.125727341655  
CAAGCTGG -0.271720164609  
CAAGCTTA -0.223599383295  
CAAGCTTC -0.0892043060741  
CAAGCTTG -0.235319968398  
CAAGGAAA 0.120536793745  
CAAGGAAC -0.224940235341

CAAGGAAG -0.147676198943  
CAAGGACA -0.242095040574  
CAAGGACC -0.206654970896  
CAAGGACG -0.300293928859  
CAAGGAGA 0.104336261788  
CAAGGAGC -0.155492991757  
CAAGGAGG -0.290047482829  
CAAGGATA 0.261246130541  
CAAGGATC 0.215865936397  
CAAGGATG 0.0425454410748  
CAAGGCAA -0.0510540825545  
CAAGGCAC -0.258852867106  
CAAGGCAG -0.0924529086557  
CAAGGCCA -0.281867908794  
CAAGGCCC -0.257883026803  
CAAGGCCG -0.265562648482  
CAAGGCCA -0.17636536235  
CAAGGCCG -0.151015836769  
CAAGGCCG -0.224510062106  
CAAGGCTA -0.303259372651  
CAAGGCTC -0.177370058399  
CAAGGCTG -0.266717700514  
CAAGGGAA -0.0072450714047  
CAAGGGAC -0.141554103123  
CAAGGGAG -0.273745652436  
CAAGGGCA -0.194430727023  
CAAGGGCC -0.179770841565  
CAAGGGCG -0.118424951845  
CAAGGGGA -0.00698354681858  
CAAGGGGC -0.321183041224  
CAAGGGGG -0.0775720588961  
CAAGGGTA -0.069541907924  
CAAGGGTC -0.0945509126631  
CAAGGGTG -0.178685277545  
CAAGGTAA 0.198300182221  
CAAGGTAC 0.0455004500648  
CAAGGTAG -0.0693683014768  
CAAGGTCA -0.12331225713  
CAAGGTCC -0.132094314671  
CAAGGTCC -0.109983260613  
CAAGGTGA -0.233480369566  
CAAGGTGC -0.235823261858  
CAAGGTGG -0.311002582043  
CAAGGTTA 0.0643698032436  
CAAGGTTC -0.109725446294  
CAAGTAAA 0.0359638545465  
CAAGTAAC -0.157610485411  
CAAGTAAG -0.11419554897  
CAAGTACA -0.164043209877  
CAAGTACC -0.215280864198  
CAAGTACG 0.0337614225735  
CAAGTAGA 0.1451237052  
CAAGTAGC -0.110017429194  
CAAGTAGG 0.0711630011154

CAAGTATA 0.115806371944  
CAAGTATC 0.0256316011216  
CAAGTATG 0.0544736712106  
CAAGTCAA -0.0264249728341  
CAAGTCAC -0.0839548552801  
CAAGTCAG -0.15474691358  
CAAGTCCA -0.196496732026  
CAAGTCCC -0.199623538192  
CAAGTCCG -0.142248841073  
CAAGTCGA -0.0285081283687  
CAAGTCGC -0.109136643004  
CAAGTCGG -0.179271155321  
CAAGTCTA -0.200019136747  
CAAGTCTC -0.242080330873  
CAAGTCTG -0.278343342078  
CAAGTGAA -0.0717935629761  
CAAGTGAC -0.0839553702439  
CAAGTGAG 0.00893915448439  
CAAGTGCA -0.0683810292213  
CAAGTGCC -0.0558025179185  
CAAGTGCG 0.173585040286  
CAAGTGGA -0.147000717608  
CAAGTGGC -0.17641104143  
CAAGTGGG -0.242877643921  
CAAGTGTA -0.140091966133  
CAAGTGTC -0.0552701627288  
CAAGTGTG -0.0334403556434  
CAAGTTAA -0.0888257731676  
CAAGTTAC 0.0082445919835  
CAAGTTAG -0.151088071161  
CAAGTTCA 0.0574189334563  
CAAGTTCC -0.248070054154  
CAAGTTCG -0.0900278617893  
CAAGTTGA 0.0105719640289  
CAAGTTGC -0.11973918198  
CAAGTTGG -0.158237654321  
CAAGTTTA -0.0358140555967  
CAAGTTTC -0.0758668378939  
CAATAAAA 0.133173042  
CAATAAAC -0.0142911103686  
CAATAAAG -0.0655941952622  
CAATAACA -0.105028205804  
CAATAACC -0.0788628090146  
CAATAACG 0.0606700274578  
CAATAAGA -0.043996344957  
CAATAAGC -0.1919476272  
CAATAAGG -0.0731182920664  
CAATAATA 0.223792367033  
CAATAATC 0.154363824953  
CAATAATG 0.0329562668774  
CAATACAA 0.051107049551  
CAATACAC 0.145669954818  
CAATACAG -0.0575553050421  
CAATACCA -0.0113682517728

CAATACCC -0.07903331251  
CAATACCG -0.128146867539  
CAATACGA 0.252151529122  
CAATACGC 0.0421880831632  
CAATACGG 0.0381009109003  
CAATACTA 0.147395871166  
CAATACTC 0.0120102276524  
CAATACTG -0.0237522479728  
CAATAGAA 0.0432830183197  
CAATAGAC -0.130654237101  
CAATAGAG 0.0958188659509  
CAATAGCA 0.0398021297924  
CAATAGCC -0.0340512415201  
CAATAGCG -0.00162567373208  
CAATAGGA 0.0179147731015  
CAATAGGC -0.309092176418  
CAATAGGG 0.0321662574637  
CAATAGTA 0.0301378734989  
CAATAGTC -0.146094312873  
CAATAGTG -0.0236528990455  
CAATATAA 0.165859843246  
CAATATAC 0.23989275286  
CAATATAG 0.0966905408743  
CAATATCA 0.292536608927  
CAATATCC 0.313048973603  
CAATATCG 0.340018441678  
CAATATGA 0.186932140107  
CAATATGC 0.0755698574811  
CAATATGG 0.178317086281  
CAATATTA 0.238808755406  
CAATATTC 0.340550469688  
CAATATTG 0.108813930625  
CAATCAAA 0.238959691761  
CAATCAAC 0.141860735403  
CAATCAAG 0.234555094514  
CAATCACA 0.289715471251  
CAATCACC 0.175270038859  
CAATCACG 0.227038674306  
CAATCAGA 0.278068658928  
CAATCAGC 0.176262839045  
CAATCAGG 0.324100144899  
CAATCATA 0.256995213945  
CAATCATC 0.129436462162  
CAATCATG 0.244258929944  
CAATCAA 0.343805572021  
CAATCCAC 0.37112286258  
CAATCCAG 0.285192869218  
CAATCCCA 0.275996978194  
CAATCCCC 0.251476431974  
CAATCCCG 0.319558157856  
CAATCCGA 0.345545014746  
CAATCCGC 0.38087399939  
CAATCCGG 0.324354597359  
CAATCCTA 0.284001859573

CAATCCTC 0.202209695931  
CAATCCTG 0.330046634608  
CAATCGAA 0.28145947438  
CAATCGAC 0.0504374409976  
CAATCGAG 0.161839524647  
CAATCGCA 0.246166216602  
CAATCGCC 0.0642824211289  
CAATCGCG 0.258775587291  
CAATCGGA 0.218077085119  
CAATCGGC 0.204373441632  
CAATCGGG 0.102641175018  
CAATCGTA 0.266481980776  
CAATCGTC 0.0602290939428  
CAATCGTG 0.231538651519  
CAATCTAA 0.342425664329  
CAATCTAC 0.354417769874  
CAATCTAG 0.373614530819  
CAATCTCA 0.30823151686  
CAATCTCC 0.310739035056  
CAATCTCG 0.408205997936  
CAATCTGA 0.339420045618  
CAATCTGC 0.34430485392  
CAATCTGG 0.41322531779  
CAATCTTA 0.31302827724  
CAATCTTC 0.264261328142  
CAATGAAA 0.0441953714062  
CAATGAAC -0.067347801269  
CAATGAAG -0.00381126422021  
CAATGACA -0.161519958865  
CAATGACC -0.213803549672  
CAATGACG -0.132089863471  
CAATGAGA 0.0195532178765  
CAATGAGC -0.211935495114  
CAATGAGG -0.122688958035  
CAATGATA 0.114222829166  
CAATGATC 0.119505916705  
CAATGATG 0.106072581176  
CAATGCAA 0.0465140267023  
CAATGCAC -0.00536806473639  
CAATGCAG -0.216558398515  
CAATGCCA -0.0839412665348  
CAATGCCC -0.247340263316  
CAATGCCG -0.16668573137  
CAATGCGA -0.0624197411962  
CAATGCGC 0.0296296834367  
CAATGCGG -0.143700798838  
CAATGCTA -0.0682418155374  
CAATGCTC -0.245530154655  
CAATGCTG -0.0580419661691  
CAATGGAA -0.0488927946503  
CAATGGAC -0.176356652949  
CAATGGAG -0.0664976513455  
CAATGGCA -0.133036459019  
CAATGGCC -0.253476780797

CAATGGCG -0.118904530611  
CAATGGGA 0.0422951107598  
CAATGGGC -0.320425030202  
CAATGGGG -0.123821117897  
CAATGGTA -0.0758825660278  
CAATGGTC -0.293982577476  
CAATGGTG -0.0993545707256  
CAATGTAA 0.159231131229  
CAATGTAC -0.0995176001844  
CAATGTAG -0.04188072186  
CAATGTCA 0.0389847152374  
CAATGTCC -0.0794376944733  
CAATGTCCG 0.0489053215754  
CAATGTGA 0.00946784245929  
CAATGTGC -0.0519181690952  
CAATGTGG -0.148610098393  
CAATGTTA 0.0144812555567  
CAATGTTC -0.0905228294153  
CAATTTAAA 0.0648504906804  
CAATTTAAC -0.00728062086983  
CAATTTAAG -0.0687268815788  
CAATTTACA 0.059658280094  
CAATTTACC 0.0556760157656  
CAATTTACG 0.258585029142  
CAATTTAGA 0.0503261517005  
CAATTTAGC -0.0405360161584  
CAATTTAGG 0.0144747384943  
CAATTTATA 0.250751937474  
CAATTTATC 0.173813432511  
CAATTTATG -0.0297604346752  
CAATTTCAA -0.0280228959947  
CAATTTCAC -0.0771846629021  
CAATTTCAG -0.0663881342444  
CAATTTCCA 0.083028746419  
CAATTTCCC 0.180560141647  
CAATTTCCG 0.152195894411  
CAATTTCGA -0.0860416872469  
CAATTTCGC 0.236046626494  
CAATTTCGG 0.0101648773848  
CAATTTCTA -0.0681601132846  
CAATTTCTC 0.179403774352  
CAATTTCTG 0.0169163046794  
CAATTTGAA 0.0576357329469  
CAATTTGAC -0.000430298192748  
CAATTTGAG 0.0215845105206  
CAATTTGCA 0.0243995975217  
CAATTTGCC -0.027137386023  
CAATTTGCG 0.165930003094  
CAATTTGGA 0.0498612905826  
CAATTTGGC -0.0402478649367  
CAATTTGGG 0.0420659224867  
CAATTTGTA 0.0499418902441  
CAATTTGTC -0.149164398624  
CAATTTGTG -0.137706213573



CAATTTAA 0.020761843883  
CAATTTAC 0.12233803157  
CAATTTAG 0.21935263609  
CAATTTCA 0.224350238984  
CAATTTCC 0.10781141954  
CAATTTCCG 0.089938857055  
CAATTTGA -0.0499106533204  
CAATTTGC 0.0322043294035  
CAATTTGG 0.0952600496169  
CAATTTTA 0.183799315023  
CAATTTTC 0.0944724362774  
CACAAAAA 0.188706118685  
CACAAAAC 0.0311028140572  
CACAAAAG -0.110602472651  
CACAAACA 0.0942446595974  
CACAAACC 0.10287943283  
CACAAACG -0.193577417797  
CACAAAGA 0.118261589645  
CACAAAGC 0.0339357575581  
CACAAAGG -0.128746728557  
CACAAATA 0.140204553049  
CACAAATC 0.286483227522  
CACAAATG 0.0296209666875  
CACAAACA 0.235696540903  
CACAAACAC 0.196690086931  
CACAAACAG -0.110881408627  
CACAAACCA -0.183667506214  
CACAAACC -0.1011331774  
CACAAACCG -0.185360899842  
CACAAACGA 0.238661340512  
CACAAACGC -0.0476829886522  
CACAAACGG -0.0095356923944  
CACAAACTA -0.0840880151046  
CACAAACTC -0.151933428811  
CACAAACTG -0.0977201488527  
CACAAAGAA -0.0189123617147  
CACAAAGAC -0.166683128385  
CACAAAGAG 0.103582583935  
CACAAAGCA -0.0273346394253  
CACAAAGCC -0.304182012525  
CACAAAGCG 0.0994725460493  
CACAAAGGA -0.119619075839  
CACAAAGGC -0.162652751027  
CACAAAGGG -0.192702977487  
CACAAAGTA 0.00205263302324  
CACAAAGTC -0.117060160032  
CACAAAGTG -0.166273502684  
CACAAATA 0.155362979966  
CACAAATAC 0.100915976153  
CACAAATAG 0.0349541153483  
CACAAATCA 0.192813040257  
CACAAATCC 0.325591670509  
CACAAATCG 0.263628180641  
CACAAATGA -0.0970072494298

CACAATGC -0.163845668341  
CACAATGG -0.0449078485602  
CACAATTA 0.100682812023  
CACAATTC 0.0837984687577  
CACACAAA 0.107562848236  
CACACAAC -0.0900949570285  
CACACAAG -0.0229219743604  
CACACACA -0.0626865021138  
CACACACC -0.169775494861  
CACACACG -0.301618633518  
CACACAGA 0.191273081226  
CACACAGC -0.0530670771183  
CACACAGG -0.178726105029  
CACACATA 0.0378263332994  
CACACATC -0.131912106044  
CACACATG -0.295026780216  
CACACCAA 0.0191250082329  
CACACCAC -0.108950055055  
CACACCAG 0.0691525486516  
CACACCCA -0.265112583628  
CACACCCC -0.191115474434  
CACACCCG -0.214671023965  
CACACCGA 0.168707707695  
CACACCGC -0.0783333744937  
CACACCGG -0.136198603479  
CACACCTA 0.0534180756441  
CACACCTC -0.124017735634  
CACACCTG -0.173728923712  
CACACGAA -0.0380579156513  
CACACGAC -0.176209876543  
CACACGAG -0.0639034611125  
CACACGCA -0.214145404664  
CACACGCC -0.141556464546  
CACACGCG -0.19880098988  
CACACGGA -0.104106649985  
CACACGGC -0.24517856457  
CACACGGG -0.128885984023  
CACACGTA 0.00988043525635  
CACACGTC -0.260279260054  
CACACGTG -0.210564582064  
CACACTAA 0.0981258989148  
CACACTAC 0.0276800371915  
CACACTAG 0.0231795968412  
CACACTCA 0.0175168499857  
CACACTCC -0.252919067215  
CACACTCG -0.0635780464208  
CACACTGA -0.0257307545925  
CACACTGC -0.161443157687  
CACACTGG -0.273440329218  
CACACTTA -0.141189545712  
CACACTTC 0.14545494167  
CACAGAAA -0.0195758833021  
CACAGAAC -0.0724767866844  
CACAGAAG 0.00537043977467

CACAGACA 0.0127889239173  
CACAGACC -0.167445854665  
CACAGACG -0.0359493266311  
CACAGAGA 0.120818502753  
CACAGAGC -0.157397348959  
CACAGAGG -0.102998397489  
CACAGATA 0.233391512437  
CACAGATC 0.136528990455  
CACAGATG 0.0778478346142  
CACAGCAA 0.0882672555315  
CACAGCAC -0.160610301583  
CACAGCAG -0.126168326885  
CACAGCCA -0.00986687275918  
CACAGCCC -0.306718692747  
CACAGCCG -0.141167755991  
CACAGCGA 0.0343454447721  
CACAGCGC -0.169332598621  
CACAGCGG 0.0654032222916  
CACAGCTA -0.242599130907  
CACAGCTC -0.261885954085  
CACAGCTG 0.0507502908955  
CACAGGAA -0.0300738417465  
CACAGGAC -0.213443718228  
CACAGGAG -0.0402521211323  
CACAGGCA -0.073842426496  
CACAGGCC -0.336627769823  
CACAGGCG -0.143407227082  
CACAGGGA 0.0124660097148  
CACAGGGC -0.201771968046  
CACAGGGG -0.18815192859  
CACAGGTA -0.0334592419334  
CACAGGTC -0.158081456605  
CACAGGTG -0.292470750892  
CACAGTAA 0.0453056049529  
CACAGTAC -0.178510288066  
CACAGTAG -0.237548554875  
CACAGTCA -0.0154614035954  
CACAGTCC -0.249275720165  
CACAGTCG -0.206318596353  
CACAGTGA -0.0927155502983  
CACAGTGC -0.201562062779  
CACAGTGG -0.0923462880485  
CACAGTTA -0.0203347231706  
CACAGTTC -0.0134216953432  
CACATAAA 0.0330506846684  
CACATAAC -0.121660725336  
CACATAAG -0.0057341682042  
CACATACA 0.11190970164  
CACATACC -0.105806384333  
CACATACG 0.0355423835789  
CACATAGA -0.0155744902719  
CACATAGC -0.160953886172  
CACATAGG -0.193278463649  
CACATATA -0.133161823221

CACATATC 0.18492173264  
CACATATG 0.0857437398763  
CACATCAA 0.0455663132012  
CACATCAC -0.112514346316  
CACATCAG -0.146847928951  
CACATCCA 0.012659443676  
CACATCCC 0.0242093182049  
CACATCCG 0.194732595666  
CACATCGA -0.0726851394514  
CACATCGC -0.0624097945923  
CACATCGG 0.0545554386923  
CACATCTA 0.0235049068037  
CACATCTC -0.0375411846058  
CACATCTG 0.00638501881365  
CACATGAA 0.235850536806  
CACATGAC -0.129870610894  
CACATGAG 0.0482254151352  
CACATGCA -0.0745213945421  
CACATGCC -0.208674897119  
CACATGCG -0.122981581156  
CACATGGA -0.0317536646667  
CACATGGC -0.196720406681  
CACATGGG 0.068177047318  
CACATGTA -0.135359196279  
CACATGTC -0.0278573427494  
CACATGTG -0.114949056014  
CACATTAA -0.0576742577681  
CACATTAC 0.178354858861  
CACATTAG -0.0521004851918  
CACATTCA 0.168610466265  
CACATTCC 0.177731673582  
CACATTCG 0.0719727456307  
CACATTGA 0.064522830619  
CACATTGC -0.0177632821466  
CACATTGG -0.0220842461256  
CACATTTA -0.11140200663  
CACATTTTC 0.0599683856945  
CACCAAAA 0.143136286374  
CACCAAAC -0.0794923946363  
CACCAAAG 0.0999061450306  
CACCAACA 0.102452312118  
CACCAACC -0.260270152505  
CACCAACG -0.249085002826  
CACCAAGA -0.0200525807372  
CACCAAGC -0.145806684762  
CACCAAGG -0.129704299123  
CACCAATA 0.0576302443522  
CACCAATC 0.0215812093589  
CACCAATG -0.209946422399  
CACCACAA 0.0828948324205  
CACCACAC -0.221877333085  
CACCACAG -0.119416458141  
CACCACCA -0.29891693409  
CACCACCC -0.0635187197471

CACCACCG -0.0328766725263  
CACCACGA -0.0838546468238  
CACCACGC -0.158607428751  
CACCACGG -0.174518518519  
CACCACTA -0.249910832359  
CACCACTC 0.0147380381002  
CACCACTG -0.156263888203  
CACCAGAA -0.16983409493  
CACCAGAC -0.14420043573  
CACCAGAG -0.0507506726807  
CACCAGCA 0.0205898335227  
CACCAGCC -0.0735395808032  
CACCAGCG -0.201435878018  
CACCAGGA 0.176639443237  
CACCAGGC -0.0777826883831  
CACCAGGG -0.213870643818  
CACCAGTA -0.0862756515907  
CACCAGTC -0.265482274231  
CACCAGTG -0.256860227672  
CACCATAA 0.0564336873302  
CACCATAC -0.0381429888691  
CACCATAG -0.0477654264314  
CACCATCA -0.148865182844  
CACCATCC 0.0450750839755  
CACCATCG -0.100861710813  
CACCATGA -0.0489527761312  
CACCATGC -0.111741461218  
CACCATGG -0.224739698329  
CACCATTA -0.036913980213  
CACCATTC -0.00617344922955  
CACCCAAA -0.00842100064207  
CACCCAAC -0.0368297183037  
CACCCAAG -0.274824435551  
CACCCACA -0.119372889925  
CACCCACC -0.0791978107851  
CACCCACG -0.0254475217977  
CACCCAGA -0.147900103699  
CACCCAGC -0.165123520972  
CACCCAGG -0.340643202685  
CACCCATA 0.0189370204645  
CACCCATC -0.172540123457  
CACCCATG -0.208852906316  
CACCCCAA -0.0703499283845  
CACCCCAC -0.132766582704  
CACCCCAG -0.2404444444444  
CACCCCCA -0.059001882309  
CACCCCCC -0.201136505558  
CACCCCCG -0.0847521977479  
CACCCCGA 0.125406156008  
CACCCCGC -0.0872184907151  
CACCCCGG -0.315005020328  
CACCCCTA -0.29723360712  
CACCCCTC -0.211221496006  
CACCCCTG -0.221166246471

CACCCGAA -0.175659161606  
CACCCGAC -0.273638473313  
CACCCGAG -0.155162090761  
CACCCGCA -0.0510404833638  
CACCCGCC -0.155917695473  
CACCCGCG -0.269052799136  
CACCCGGA -0.0463176825034  
CACCCGGC -0.0608716619797  
CACCCGGG -0.264524659962  
CACCCGTA -0.176787879786  
CACCCGTC -0.123931668365  
CACCCGTG -0.13535396379  
CACCCCTAA 0.0787064480011  
CACCCCTAC -0.162663330096  
CACCCCTAG -0.117282516187  
CACCCCTCA -0.0475050549655  
CACCCCTCC -0.138554150753  
CACCCCTCG 0.067136490373  
CACCCCTGA -0.166353863124  
CACCCCTGC -0.198660500301  
CACCCCTGG -0.211688032575  
CACCCCTTA -0.251071277687  
CACCCCTTC -0.176108950321  
CACCGAAA 0.196777573534  
CACCGAAC -0.280297202615  
CACCGAAG 0.0163932997254  
CACCGACA -0.0939291119678  
CACCGACC -0.078731601304  
CACCGACG -0.342597029924  
CACCGAGA 0.156815771505  
CACCGAGC -0.227494938522  
CACCGAGG -0.154200889942  
CACCGATA 0.202508970988  
CACCGATC -0.0303574172869  
CACCGATG -0.0102998567406  
CACCGCAA 0.1632143406  
CACCGCAC -0.0232951894844  
CACCGCAG -0.0688308217049  
CACCGCCA -0.119000296282  
CACCGCCC -0.0920667061767  
CACCGCCG 0.072721009736  
CACCGCGA -0.0329852788648  
CACCGCGC 0.106124722826  
CACCGCGG -0.0532659449454  
CACCGCTA -0.0748861180189  
CACCGCTC -0.150502406392  
CACCGCTG -0.164853050136  
CACCGGAA -0.00759772445973  
CACCGGAC -0.221598252692  
CACCGGAG -0.202873383482  
CACCGGCA -0.286677201126  
CACCGGCC -0.255128000348  
CACCGGCG -0.209350762527  
CACCGGGA -0.133974865439

CACCGGC -0.250303140037  
CACCGGG 0.031544462685  
CACCGGTA -0.0221547291773  
CACCGGTC -0.129764080275  
CACCGGTG -0.28056378357  
CACCGTAA 0.140361454535  
CACCGTAC 0.0119230601601  
CACCGTAG -0.322350152781  
CACCGTCA -0.0908053168253  
CACCGTCC -0.0351758720972  
CACCGTCG -0.222701525054  
CACCGTGA -0.216715131902  
CACCGTGC -0.198850915317  
CACCGTGG -0.197877221289  
CACCGTTA 0.0538665737604  
CACCGTTC -0.116329991274  
CACCTAAA 0.00066957547817  
CACCTAAC 0.0104165153342  
CACCTAAG -0.0512984409411  
CACCTACA -0.230413214019  
CACCTACC -0.314890710383  
CACCTACG -0.169058085548  
CACCTAGA 0.106331265527  
CACCTAGC -0.185776065505  
CACCTAGG -0.00953094469692  
CACCTATA 0.000119123022122  
CACCTATC -0.162902234514  
CACCTATG -0.047927216523  
CACCTCAA -0.0152486882259  
CACCTCAC -0.195718729939  
CACCTCAG -0.174988476228  
CACCTCCA -0.258536879759  
CACCTCCC -0.20995437132  
CACCTCCG -0.0218264954132  
CACCTCGA -0.201756552087  
CACCTCGC -0.243092614595  
CACCTCGG -0.162084470435  
CACCTCTA -0.198983297023  
CACCTCTC -0.142771453552  
CACCTCTG -0.0754665179155  
CACCTGAA -0.0592666308311  
CACCTGAC -0.209692729767  
CACCTGAG -0.227462535873  
CACCTGCA -0.0335692433737  
CACCTGCC -0.299001371742  
CACCTGCG -0.0789940037651  
CACCTGGA -0.0681141975309  
CACCTGGC -0.11768773096  
CACCTGGG -0.292195368816  
CACCTGTA 0.12233521712  
CACCTGTC -0.133650542768  
CACCTTAA -0.0770769534723  
CACCTTAC -0.0805093487136  
CACCTTAG -0.107060566879

CACCTTCA -0.0973968909331  
CACCTTCC -0.113115020801  
CACCTTCG -0.267352084283  
CACCTTGA -0.185800670541  
CACCTTGC -0.220683127572  
CACCTTGG -0.23694702281  
CACCTTTA 0.0524385105981  
CACCTTTC -0.0945885129387  
CACGAAAA 0.125618525998  
CACGAAAC -0.107616524162  
CACGAAAG 0.00899132683451  
CACGAACA -0.102741437366  
CACGAACC -0.0319279125028  
CACGAACG -0.23154367941  
CACGAAGA 0.0411973918198  
CACGAAGC -0.105179375454  
CACGAAGG -0.141257778546  
CACGAATA 0.145047092143  
CACGAATC 0.319586757736  
CACGAATG 0.00194238228757  
CACGACAA 0.0525196335079  
CACGACAC -0.16702062857  
CACGACAG -0.115620986069  
CACGACCA -0.133792957211  
CACGACCC -0.18682156582  
CACGACCG -0.189461151438  
CACGACGA -0.243782200056  
CACGACGC -0.109710181979  
CACGACGG -0.211665294925  
CACGACTA -0.217599223007  
CACGACTC -0.0452902977586  
CACGACTG -0.0423472524095  
CACGAGAA 0.0507425335046  
CACGAGAC -0.194101041818  
CACGAGAG -0.150185743055  
CACGAGCA -0.0313380711368  
CACGAGCC -0.278325452243  
CACGAGCG -0.178348862141  
CACGAGGA -0.0879910878429  
CACGAGGC -0.271275715145  
CACGAGGG -0.0707364200311  
CACGAGTA 0.0105370970319  
CACGAGTC -0.0166697654961  
CACGAGTG -0.00267645460832  
CACGATAA 0.029524350489  
CACGATAC 0.00630639531054  
CACGATAG 0.0121804537491  
CACGATCA 0.0677364055032  
CACGATCC 0.104258600628  
CACGATCG 0.1684285926  
CACGATGA -0.0164099226572  
CACGATGC -0.146120686293  
CACGATGG 0.0412694492467  
CACGATTA 0.178575683175



CACGATTC 0.370765475862  
CACGCAAA -0.0807098339459  
CACGCAAC -0.0636178328051  
CACGCAAG -0.0800074956638  
CACGCACA -0.0639993414012  
CACGCACC -0.178118210547  
CACGCACG -0.113535861841  
CACGCAGA 0.115739543533  
CACGCAGC -0.280371822803  
CACGCAGG -0.155946815049  
CACGCATA -0.0971612453329  
CACGCATC -0.174934987579  
CACGCATG -0.208350480957  
CACGCCAA -0.0300198687128  
CACGCCAC -0.123629011462  
CACGCCAG -0.216021335441  
CACGCCCA -0.275824513467  
CACGCCCC -0.372801196509  
CACGCCCG -0.127629136688  
CACGCCGA -0.0928053248266  
CACGCCGC -0.348270129699  
CACGCCGG -0.155992296677  
CACGCCTA -0.0693539005224  
CACGCCTC -0.23950617284  
CACGCCTG -0.16162962963  
CACGCGAA -0.0331826714088  
CACGCGAC 0.0103532110595  
CACGCGAG -0.0313179213594  
CACGCGCA 0.0928348321299  
CACGCGCC -0.136027434842  
CACGCGCG -0.172843469766  
CACGCGGA -0.147424711357  
CACGCGGC -0.0508644708439  
CACGCGGG -0.155595614382  
CACGCGTA 0.0344272102571  
CACGCGTC -0.0649762630005  
CACGCGTG 0.125790045428  
CACGCTAA -0.192181883044  
CACGCTAC 0.147119036642  
CACGCTAG -0.0942655339326  
CACGCTCA -0.127852859832  
CACGCTCC -0.161703213486  
CACGCTCG -0.214583607709  
CACGCTGA -0.0921682879858  
CACGCTGC -0.129590250446  
CACGCTGG -0.128327324806  
CACGCTTA -0.0886812466852  
CACGCTTC -0.254665249302  
CACGAAA 0.0119870908253  
CACGGAAC 0.00984508196245  
CACGGAAG -0.202497778107  
CACGGACA -0.155272097643  
CACGGACC -0.184395937248  
CACGGACG -0.120770862359

CACGGAGA -0.0674877604338  
CACGGAGC -0.116431072305  
CACGGAGG -0.331205455422  
CACGGATA 0.220828772519  
CACGGATC 0.179065402094  
CACGGATG -0.0828570598405  
CACGGCAA 0.0390897714549  
CACGGCAC -0.191680464779  
CACGGCAG -0.191663737738  
CACGGCCA -0.183143064633  
CACGGCCC -0.206117612206  
CACGGCCG -0.19495742533  
CACGGCGA -0.0529905713829  
CACGGCGC -0.354441317336  
CACGGCGG -0.0719783950617  
CACGGCTA -0.0591227896869  
CACGGCTC -0.271860666711  
CACGGCTG -0.239472560542  
CACGGGAA -0.0786587981438  
CACGGGAC -0.33975989685  
CACGGGAG -0.210873311483  
CACGGGCA -0.0577036484009  
CACGGGCC -0.295171634381  
CACGGGCG -0.0207565081874  
CACGGGGA -0.0510663286026  
CACGGGGC -0.0388273642132  
CACGGGGG -0.331260255275  
CACGGGTA -0.0489016205419  
CACGGGTC -0.216996142852  
CACGGTAA -0.0141894149608  
CACGGTAC 0.0589008540253  
CACGGTAG -0.148702977487  
CACGGTCA -0.0932527404205  
CACGGTCC -0.232945417784  
CACGGTCG -0.10757457895  
CACGGTGA -0.15942446596  
CACGGTGC -0.256317873024  
CACGGTGG -0.125878175152  
CACGGTTA -0.0342234954504  
CACGGTTC -0.275525488453  
CACGTAAA -0.138916329151  
CACGTAAAC -0.0393076918607  
CACGTAAAG 0.090225618526  
CACGTACA -0.0493910198674  
CACGTACC -0.230342299851  
CACGTACG -0.149629704726  
CACGTAGA 0.0310795693926  
CACGTAGC -0.0828219912094  
CACGTAGG -0.224951719446  
CACGTATA 0.0862973659285  
CACGTATC 0.184099196606  
CACGTATG -0.164902315062  
CACGTCAA -0.0720574434456  
CACGTCAC -0.104464751242

CACGTCAG -0.183640374706  
CACGTCCA -0.0741358923181  
CACGTCCC -0.237196373495  
CACGTCCG -0.180199606055  
CACGTCGA 0.00629141862702  
CACGTCGC -0.188068571296  
CACGTCGG -0.218481793547  
CACGTCTA -0.206917079541  
CACGTCTC -0.220987654321  
CACGTCTG -0.0545162917171  
CACGTGAA -0.000661310327417  
CACGTGAC -0.275169110749  
CACGTGAG -0.0174689007032  
CACGTGCA 0.000902873828185  
CACGTGCC -0.0902264922939  
CACGTGCG -0.0507889465163  
CACGTGGA -0.00763854588561  
CACGTGGC -0.127437983015  
CACGTGGG -0.219950729456  
CACGTGTA 0.0818129926014  
CACGTGTC 0.053709274421  
CACGTTAA -0.00713791740763  
CACGTTAC -0.00392983380535  
CACGTTAG 0.0166390892028  
CACGTTCA -0.186218513215  
CACGTTCC -0.0851456731587  
CACGTTCG -0.169651752855  
CACGTTGA -0.198095476029  
CACGTTGC 0.0348771664754  
CACGTTGG -0.22959049312  
CACGTTTA -0.102201670753  
CACGTTTC -0.054379624141  
CACTAAAA 0.180417822847  
CACTAAAC -0.140609563327  
CACTAAAG 0.0646576520562  
CACTAACA 8.02588037734E-5  
CACTAACC -0.171387772771  
CACTAACG -0.172434324975  
CACTAAGA 0.0264976088232  
CACTAAGC -0.0968474089789  
CACTAAGG -0.293574759945  
CACTAATA 0.202273924784  
CACTAATC 0.0820899859079  
CACTAATG -0.00547761751081  
CACTACAA 0.0780423280423  
CACTACAC -0.110617694996  
CACTACAG -0.199685016902  
CACTACCA -0.00425914948737  
CACTACCC -0.15253530661  
CACTACCG -0.194331950481  
CACTACGA 0.0488762657446  
CACTACGC -0.069358702094  
CACTACGG 0.162201694878  
CACTACTA 0.054759709324

CACTACTC -0.131141492551  
CACTACTG -0.0619899793111  
CACTAGAA -0.0627006569199  
CACTAGAC -0.0320059045612  
CACTAGAG -0.0436903860296  
CACTAGCA -0.15138357032  
CACTAGCC -0.11589049665  
CACTAGCG -0.130330128792  
CACTAGGA -0.117761818018  
CACTAGGC -0.12153069345  
CACTAGGG -0.0232773524327  
CACTAGTA -0.0680831653021  
CACTAGTC -0.109337185756  
CACTAGTG -0.121654981732  
CACTATAA 0.0241904319149  
CACTATAC 0.0222910063778  
CACTATAG -0.0892532160276  
CACTATCA 0.0447334189554  
CACTATCC 0.198089579126  
CACTATCG 0.165767872968  
CACTATGA -0.0922852312894  
CACTATGC 0.0864810423939  
CACTATGG 0.0315429537421  
CACTATTA -0.107586515444  
CACTATTC 0.0892377202795  
CACTCAAA 0.179533072799  
CACTCAAC -0.1355247127  
CACTCAAG 0.160025467079  
CACTCACA 0.000773496751314  
CACTCACC 0.0151221071288  
CACTCACG -0.0163545996418  
CACTCAGA -0.0472084610579  
CACTCAGC -0.0225080993128  
CACTCAGG -0.188568498662  
CACTCATA 0.115390873564  
CACTCATC -0.0360298799095  
CACTCATG -0.0932519970951  
CACTCCAA -0.160536512013  
CACTCCAC -0.157765897171  
CACTCCAG -0.161693522613  
CACTCCCA -0.0478119134644  
CACTCCCC -0.126981314059  
CACTCCCG -0.0950994916485  
CACTCCGA -0.31248354072  
CACTCCGC -0.126898523165  
CACTCCGG -0.0263610531637  
CACTCCTA -0.170310212192  
CACTCCTC -0.237582038298  
CACTCCTG -0.244614995309  
CACTCGAA 0.0188848372147  
CACTCGAC -0.185072745021  
CACTCGAG -0.0140430598377  
CACTCGCA -0.111801891835  
CACTCGCC -0.287141193316

CACTCGCG -0.175013438322  
CACTCGGA 0.0849723243212  
CACTCGGC -0.273965679497  
CACTCGGG -0.0737281373219  
CACTCGTA 0.0511862042915  
CACTCGTC -0.245132897603  
CACTCTAA 0.0553305231728  
CACTCTAC -0.074990533577  
CACTCTAG -0.02691889756  
CACTCTCA -0.148438975491  
CACTCTCC -0.00297095869714  
CACTCTCG -0.178668661834  
CACTCTGA 0.00866331878928  
CACTCTGC -0.0873520404902  
CACTCTGG -0.0712231716084  
CACTCTTA 0.0716197172868  
CACTCTTC -0.281221775306  
CACTGAAA 0.0743175511746  
CACTGAAC -0.0742924528302  
CACTGAAG -0.382213542045  
CACTGACA -0.101161271911  
CACTGACC -0.0477899612543  
CACTGACG -0.0124206898066  
CACTGAGA 0.000354481135502  
CACTGAGC -0.213783587509  
CACTGAGG -0.21181670041  
CACTGATA 0.0799427600134  
CACTGATC 0.0703833916871  
CACTGATG -0.130906175192  
CACTGCAA 0.0481614923075  
CACTGCAC -0.0879734817303  
CACTGCAG -0.0460552674186  
CACTGCCA -0.144461455727  
CACTGCCC -0.256195887516  
CACTGCCG -0.145083676269  
CACTGCGA -0.015170186878  
CACTGCGC 0.0492330067781  
CACTGCGG -0.0925288975781  
CACTGCTA -0.10431815523  
CACTGCTC -0.185999529435  
CACTGCTG -0.128823367319  
CACTGGAA -0.186793860877  
CACTGGAC -0.0535535826342  
CACTGGAG -0.238274509804  
CACTGGCA -0.293941928719  
CACTGGCC -0.10129621398  
CACTGGCG -0.159131964931  
CACTGGGA -0.0830627445373  
CACTGGGC -0.149385391131  
CACTGGGG -0.232998592732  
CACTGGTA -0.170368616606  
CACTGGTC -0.238765089287  
CACTGTAA 0.144142670157  
CACTGTAC -0.189655456237

CACTGTAG -0.127901301282  
CACTGTCA -0.077037037037  
CACTGTCC -0.131874340926  
CACTGTCCG -0.12995365595  
CACTGTGA -0.112644386083  
CACTGTGC -0.366477125066  
CACTGTGG 0.12865540407  
CACTGTTA -0.0435684647303  
CACTGTTC -0.0928113614309  
CACTTAAA 0.0116824738194  
CACTTAAC -0.0426352961972  
CACTTAAG -0.131095854325  
CACTTACA -0.121390741198  
CACTTACC -0.186046296296  
CACTTACG -0.00622406639004  
CACTTAGA 0.122082757088  
CACTTAGC -0.224662309368  
CACTTAGG -0.0276748717104  
CACTTATA 0.0178461656677  
CACTTATC 0.16418801041  
CACTTATG 0.0701334054397  
CACTTCAA -0.122693645933  
CACTTCAC 0.0323630456496  
CACTTCAG -0.0120048649183  
CACTTCCA -0.15893910705  
CACTTCCC -0.288996874673  
CACTTCCG -0.0509067158445  
CACTTCGA -0.0665454205092  
CACTTCGC -0.19411387092  
CACTTCGG -0.135200092186  
CACTTCTA -0.139604938272  
CACTTCTC -0.185913266818  
CACTTCTG -0.124392156863  
CACTTGAA -0.0944997348142  
CACTTGAC -0.0889500322504  
CACTTGAG -0.0169845858818  
CACTTGCA -0.0512751974246  
CACTTGCC -0.00471674816022  
CACTTGCG -0.145543538501  
CACTTGGA 0.223617697425  
CACTTGGC -0.0402366679318  
CACTTGGG -0.0926587889564  
CACTTGTA 0.0167813782959  
CACTTGTC -0.0749697122885  
CACTTTAA 0.0296587392675  
CACTTTAC 0.0882033327038  
CACTTTAG -0.130179268112  
CACTTTCA 0.00273057586336  
CACTTTCC 0.0509381664352  
CACTTTCCG 0.0145179258381  
CACTTTGA -0.119286190547  
CACTTTGC -0.0957356572259  
CACTTTGG -0.0424342700976  
CACTTTTA 0.0724376389232

CACTTTTC -0.0570868734769  
CAGAAAAA -0.10437456773  
CAGAAAAC 0.124470820682  
CAGAAAAG -0.0464936876208  
CAGAAACA 0.0566022111487  
CAGAAACC -0.133456899156  
CAGAAACG 0.050548428806  
CAGAAAGA 0.0553515291328  
CAGAAAGC -0.234567972953  
CAGAAAGG -0.153254901961  
CAGAAATA 0.200624602077  
CAGAAATC 0.379116446025  
CAGAAATG -0.0817616550201  
CAGAACAA -0.153720009412  
CAGAACAC -0.11468555841  
CAGAACAG -0.0725292635946  
CAGAACCA -0.0285230711634  
CAGAACCC -0.0593654206558  
CAGAACCG 0.0483325649301  
CAGAACGA -0.112245653892  
CAGAACGC 0.00476492088488  
CAGAACGG 0.0159169246306  
CAGAACTA 0.150012350558  
CAGAACTC -0.0282250982458  
CAGAACTG 0.104045183346  
CAGAAGAA 0.126429778919  
CAGAAGAC -0.201327160494  
CAGAAGAG -0.196150157627  
CAGAAGCA -0.196452227671  
CAGAAGCC -0.247304393633  
CAGAAGCG -0.0161482515065  
CAGAAGGA -0.0904543982968  
CAGAAGGC -0.207283212888  
CAGAAGGG -0.185956942524  
CAGAAGTA 0.000480252036269  
CAGAAGTC -0.0826569642691  
CAGAATAA 0.169419268004  
CAGAATAC 0.00916869744671  
CAGAATAG -0.0377609576802  
CAGAATCA 0.367206136591  
CAGAATCC 0.43056104415  
CAGAATCG 0.345017250928  
CAGAATGA -0.0569712201996  
CAGAATGC -0.0290136998242  
CAGAATGG -0.239894970431  
CAGAATTA 0.11702090567  
CAGAATTC 0.224467057455  
CAGACAAA -0.0824743682627  
CAGACAAC -0.190154845402  
CAGACAAG -0.148332894332  
CAGACACA -0.103003314456  
CAGACACC -0.168496732026  
CAGACACG -0.0363154300989  
CAGACAGA 0.0115258787502

CAGACAGC -0.100983733247  
CAGACAGG -0.245072868685  
CAGACATA -0.0520898406288  
CAGACATC 0.0394726009353  
CAGACATG 0.00199490708727  
CAGACCAA -0.0869890452107  
CAGACCAC -0.254185805304  
CAGACCAG -0.263315557311  
CAGACCCA -0.224744577074  
CAGACCCC -0.248144990891  
CAGACCCG -0.253741638857  
CAGACCGA -0.0611418411695  
CAGACCGC -0.041703465266  
CAGACCGG -0.0892264207898  
CAGACCTA -0.111129670892  
CAGACCTC -0.176986176427  
CAGACCTG -0.125880261231  
CAGACGAA 0.0682942774541  
CAGACGAC -0.0983450485895  
CAGACGAG -0.200132455333  
CAGACGCA -0.171711435908  
CAGACGCC -0.371418281937  
CAGACGCG -0.0307859018756  
CAGACGGA 0.0573694287316  
CAGACGGC -0.159986752504  
CAGACGGG -0.184017429194  
CAGACGTA -0.00691092935075  
CAGACGTC -0.0146262385698  
CAGACTAA -0.130729767338  
CAGACTAC -0.213216048432  
CAGACTAG -0.029770137654  
CAGACTCA -0.134148817657  
CAGACTCC -0.244425650649  
CAGACTCG -0.30703818913  
CAGACTGA -0.0861995466739  
CAGACTGC -0.139354103906  
CAGACTGG -0.214145803499  
CAGACTTA -0.180048621744  
CAGACTTC -0.171108367627  
CAGAGAAA 0.0793848880624  
CAGAGAAC -0.0168027017683  
CAGAGAAG -0.0233102020972  
CAGAGACA -0.144058278476  
CAGAGACC -0.191851595768  
CAGAGACG -0.1614291939  
CAGAGAGA -0.0868841979864  
CAGAGAGC -0.310002120447  
CAGAGAGG -0.237020974999  
CAGAGATA 0.206277854618  
CAGAGATC 0.268743550901  
CAGAGATG -0.135718228032  
CAGAGCAA -0.022945547543  
CAGAGCAC -0.00157023826546  
CAGAGCAG -0.277549929709



CAGAGCCA -0.209039920094  
CAGAGCCC -0.170689905592  
CAGAGCCG -0.177026897479  
CAGAGCGA -0.0662995703492  
CAGAGCGC -0.079118925326  
CAGAGCGG -0.0746832178155  
CAGAGCTA -0.0845  
CAGAGCTC -0.1465753211  
CAGAGCTG -0.224041144085  
CAGAGGAA -0.206568162741  
CAGAGGAC -0.183752558425  
CAGAGGAG -0.177052985038  
CAGAGGCA -0.0603463887654  
CAGAGGCC -0.147490740741  
CAGAGGCG -0.243860749751  
CAGAGGGA -0.0256784592634  
CAGAGGGC -0.195895424837  
CAGAGGGG -0.177516339869  
CAGAGGTA -0.0510965128914  
CAGAGGTC -0.412472229079  
CAGAGTAA 0.0512634745  
CAGAGTAC -0.252422959158  
CAGAGTAG -0.0188412534685  
CAGAGTCA -0.0886013433426  
CAGAGTCC -0.104792629603  
CAGAGTCG -0.214383746803  
CAGAGTGA -0.0127460019537  
CAGAGTGC 0.0681325577747  
CAGAGTGG -0.144633685614  
CAGAGTTA -0.0626122226032  
CAGAGTTC -0.0453926862461  
CAGATAAA -0.0503348684497  
CAGATAAC 0.148168756265  
CAGATAAG 0.0630787558293  
CAGATACA 0.174531822872  
CAGATACC 0.271223105197  
CAGATACG 0.405785527673  
CAGATAGA -0.0107330715662  
CAGATAGC 0.177308848953  
CAGATAGG -0.102762958572  
CAGATATA 0.153141397177  
CAGATATC 0.46540714529  
CAGATATG 0.357649673848  
CAGATCAA -0.00316288671588  
CAGATCAC 0.144092076665  
CAGATCAG 0.0216964148499  
CAGATCCA 0.184909854285  
CAGATCCC 0.248876265745  
CAGATCCG 0.27672046838  
CAGATCGA -0.0672627280511  
CAGATCGC 0.413989761243  
CAGATCGG 0.274661546422  
CAGATCTA 0.235208237283  
CAGATCTC 0.402654250142

CAGATCTG 0.345978425308  
CAGATGAA 0.131962866648  
CAGATGAC -0.132794524368  
CAGATGAG -0.159046296296  
CAGATGCA -0.0483689747136  
CAGATGCC -0.102687782607  
CAGATGCG 0.0273620167292  
CAGATGGA -0.0807970014383  
CAGATGGC -0.272701184893  
CAGATGGG -0.198794830756  
CAGATGTA 0.0574710751059  
CAGATGTC 0.132215944693  
CAGATTAA 0.0891854197841  
CAGATTAC 0.476630395305  
CAGATTAG 0.05571600831  
CAGATTCA 0.303714132034  
CAGATTCC 0.484216872721  
CAGATTCCG 0.446486342981  
CAGATTGA 0.0862930580254  
CAGATTGC 0.472062818706  
CAGATTGG 0.0373178562608  
CAGATTTA 0.268117036886  
CAGATTTTC 0.48725611262  
CAGCAAAA 0.041364152714  
CAGCAAAC 0.0801911128675  
CAGCAAAG -0.117740023706  
CAGCAACA -0.111184866065  
CAGCAACC -0.0642321665734  
CAGCAACG -0.131916318175  
CAGCAAGA 0.105694942833  
CAGCAAGC -0.108334979261  
CAGCAAGG -0.195740333811  
CAGCAATA 0.230835500414  
CAGCAATC 0.347965638544  
CAGCAATG -0.212946043975  
CAGCACAA 0.0241846207488  
CAGCACAC -0.274527777778  
CAGCACAG -0.248251115171  
CAGCACCA -0.158668960027  
CAGCACCC -0.123680464779  
CAGCACCG -0.116336717318  
CAGCACGA -0.0532892137495  
CAGCACGC -0.298402273687  
CAGCACGG -0.0525547339212  
CAGCACTA -0.106591861283  
CAGCACTC -0.176234567901  
CAGCACTG -0.127782135076  
CAGCAGAA 0.0200074630142  
CAGCAGAC -0.192699416129  
CAGCAGAG -0.0783000670698  
CAGCAGCA -0.0416282465038  
CAGCAGCC -0.187554524056  
CAGCAGCG -0.144384087791  
CAGCAGGA -0.100376180102

CAGCAGGC -0.129351595768  
CAGCAGGG -0.198926589947  
CAGCAGTA -0.138588432854  
CAGCAGTC -0.180894442798  
CAGCATAA -0.0550170689283  
CAGCATAC -0.0838354653364  
CAGCATAG -0.0479734365138  
CAGCATCA 0.0783301614051  
CAGCATCC -0.0767553353769  
CAGCATCG 0.0217846091264  
CAGCATGA -0.103900522411  
CAGCATGC -0.195606974574  
CAGCATGG -0.185497942387  
CAGCATTAA 0.0451019133265  
CAGCATTC -0.0478170192915  
CAGCCAAA -0.0194688662781  
CAGCCAAC -0.143875910286  
CAGCCAAG 0.0293565668069  
CAGCCACA -0.0686574708904  
CAGCCACC -0.170461338532  
CAGCCACG -0.23982615567  
CAGCCAGA -0.0134429846225  
CAGCCAGC -0.173387225613  
CAGCCAGG -0.238889711975  
CAGCCATA 0.0463155063777  
CAGCCATC -0.232996416833  
CAGCCATG -0.167772255609  
CAGCCCAA -0.0103996888428  
CAGCCCAC -0.233302680952  
CAGCCCAG -0.190610235896  
CAGCCCCA -0.176114293239  
CAGCCCCC -0.295752279385  
CAGCCCCG -0.0989651066445  
CAGCCCGA -0.141410649017  
CAGCCCGC -0.111452126902  
CAGCCCGG -0.364086028141  
CAGCCCTA -0.218094168189  
CAGCCCTC -0.171564027853  
CAGCCCTG -0.427139202425  
CAGCCGAA 0.0581625092615  
CAGCCGAC -0.308170757564  
CAGCCGAG -0.0956868240407  
CAGCCGCA -0.152419624308  
CAGCCGCC -0.361687019908  
CAGCCGCG -0.0806132498932  
CAGCCGGA -0.00887966896067  
CAGCCGGC -0.424603958224  
CAGCCGGG -0.101053013798  
CAGCCGTA 0.0236605697415  
CAGCCGTC -0.248646157391  
CAGCCTAA -0.149951926847  
CAGCCTAC -0.0262377975069  
CAGCCTAG -0.285244804354  
CAGCCTCA 0.100197579649

CAGCCTCC -0.240643163591  
CAGCCTCG -0.239334178368  
CAGCCTGA -0.137435855218  
CAGCCTGC -0.276562654291  
CAGCCTGG -0.0774770770573  
CAGCCTTA -0.0843581259054  
CAGCCTTC -0.233117727415  
CAGCGAAA 0.053050135836  
CAGCGAAC -0.0602391457044  
CAGCGAAG -0.102583098731  
CAGCGACA -0.0971999833642  
CAGCGACC -0.304834619641  
CAGCGACG -0.227781344836  
CAGCGAGA -0.0116410259077  
CAGCGAGC -0.252166196586  
CAGCGAGG -0.214993566676  
CAGCGATA 0.0253011717571  
CAGCGATC 0.225019756989  
CAGCGATG -0.0797746541074  
CAGCGCAA 0.133995806714  
CAGCGCAC -0.199274586948  
CAGCGCAG -0.0765661953128  
CAGCGCCA -0.179590413943  
CAGCGCCC -0.139378625008  
CAGCGCCG -0.184145549058  
CAGCGCGA 0.0426496012087  
CAGCGCGC -0.195756088994  
CAGCGCGG -0.157621805402  
CAGCGCTA -0.217313886557  
CAGCGCTC -0.177362352722  
CAGCGCTG -0.0143737757806  
CAGCGGAA 0.123352171197  
CAGCGGAC -0.160129206692  
CAGCGGAG -0.113523398396  
CAGCGGCA -0.193170660857  
CAGCGGCC -0.319765263534  
CAGCGGCG -0.206263578906  
CAGCGGGA -0.0322708584545  
CAGCGGGC -0.407092426187  
CAGCGGGG -0.304067288858  
CAGCGGTA -0.141556464546  
CAGCGGTC -0.279259289378  
CAGCGTAA 0.122471779524  
CAGCGTAC -0.240091740188  
CAGCGTAG -0.0981258989148  
CAGCGTCA -0.183880136742  
CAGCGTCC -0.19429779321  
CAGCGTCG -0.11110331384  
CAGCGTGA -0.108087487945  
CAGCGTGC -0.149043042741  
CAGCGTGG -0.19803669826  
CAGCGTTA 0.135510658851  
CAGCGTTC -0.382459431882  
CAGCTAAA -0.102302042903

CAGCTAAC -0.116589288948  
CAGCTAAG -0.278208462264  
CAGCTACA -0.245671939904  
CAGCTACC -0.252581571861  
CAGCTACG -0.263923866585  
CAGCTAGA 0.0673343645605  
CAGCTAGC -0.301079502192  
CAGCTAGG -0.322812268576  
CAGCTATA -0.0210291575262  
CAGCTATC -0.173271211647  
CAGCTATG -0.0120857728125  
CAGCTCAA -0.129028374574  
CAGCTCAC -0.156510789591  
CAGCTCAG -0.250850357426  
CAGCTCCA -0.264537408465  
CAGCTCCC -0.23038126523  
CAGCTCCG -0.213826832881  
CAGCTCGA -0.17813295277  
CAGCTCGC -0.338498871627  
CAGCTCGG -0.173948952657  
CAGCTCTA -0.145542184077  
CAGCTCTC -0.081003655043  
CAGCTGAA 0.0183845119508  
CAGCTGAC -0.176817253051  
CAGCTGAG -0.0603238066519  
CAGCTGCA -0.0446579402322  
CAGCTGCC -0.364449642625  
CAGCTGCG -0.279501959521  
CAGCTGGA -0.0663120456744  
CAGCTGGC -0.16472702332  
CAGCTGGG -0.14514739453  
CAGCTGTA 0.0533381632967  
CAGCTGTC -0.140266394242  
CAGCTTAA -0.204485712561  
CAGCTTAC -0.263614513368  
CAGCTTAG -0.167688271605  
CAGCTTCA -0.198352569335  
CAGCTTCC -0.209852462704  
CAGCTTCG -0.248962287992  
CAGCTTGA -0.114563621618  
CAGCTTGC -0.0988213396278  
CAGCTTGG -0.231336076818  
CAGCTTTA -0.0483503552075  
CAGCTTTC -0.0874463128776  
CAGGAAAA 0.0407143954862  
CAGGAAAC -0.0632090738207  
CAGGAAAG -0.126904859699  
CAGGAACA 0.0652177702373  
CAGGAACC -0.135078206015  
CAGGAACG 0.0892696816934  
CAGGAAGA -0.0294241935307  
CAGGAAGC -0.156627266342  
CAGGAAGG -0.181227070849  
CAGGAATA 0.153439483968

CAGGAATC 0.322792487212  
CAGGAATG -0.194452676523  
CAGGACAA -0.0167714458363  
CAGGACAC -0.181859114016  
CAGGACAG -0.0631318706858  
CAGGACCA -0.217139701105  
CAGGACCC -0.3117728379  
CAGGACCG -0.23111155009  
CAGGACGA -0.130036310821  
CAGGACGC -0.29914086802  
CAGGACGG -0.245954048566  
CAGGACTA -0.24702512376  
CAGGACTC -0.30953874662  
CAGGACTG -0.198408502703  
CAGGAGAA 0.0277270107846  
CAGGAGAC -0.136084771061  
CAGGAGAG -0.182138744401  
CAGGAGCA -0.3288493298  
CAGGAGCC -0.222243137158  
CAGGAGCG -0.184618736383  
CAGGAGGA -0.15749691358  
CAGGAGGC -0.216213429528  
CAGGAGGG -0.304846539949  
CAGGAGTA 0.00951726002751  
CAGGAGTC -0.281047849489  
CAGGATAA 0.142217721575  
CAGGATAC 0.310945331454  
CAGGATAG -0.0225785340314  
CAGGATCA 0.090001888629  
CAGGATCC 0.278500027055  
CAGGATCG 0.212112230784  
CAGGATGA 0.0486577641661  
CAGGATGC -0.0965382201873  
CAGGATGG -0.22895886826  
CAGGATTA 0.222397857253  
CAGGATTC 0.408471227464  
CAGGCAAA -0.15373388203  
CAGGCAAC 0.0252887000812  
CAGGCAAG -0.173835875091  
CAGGCACA -0.187129304743  
CAGGCACC -0.0973841037798  
CAGGCACG -0.0459566087128  
CAGGCAGA -0.0563855005185  
CAGGCAGC -0.279294861183  
CAGGCAGG -0.148118994783  
CAGGCATA 0.0134360798261  
CAGGCATC 0.00125449473112  
CAGGCATG -0.173045751634  
CAGGCCAA -0.321476178721  
CAGGCCAC -0.205443718228  
CAGGCCAG -0.0619872405699  
CAGGCCCA -0.0656823535221  
CAGGCCCC -0.348251208066  
CAGGCCCG -0.286115532525

CAGGCCGA -0.136325355071  
CAGGCCGC -0.274006231965  
CAGGCCGG -0.273106085544  
CAGGCCTA -0.21313253957  
CAGGCCTC -0.399758096367  
CAGGCCTG -0.334370063191  
CAGGCGAA -0.0689102191647  
CAGGCGAC -0.0421523229602  
CAGGCGAG -0.0679731783737  
CAGGCGCA -0.131235238922  
CAGGCGCC -0.172908093278  
CAGGCGCG -0.072094013928  
CAGGCGGA 0.0289236508591  
CAGGCGGC -0.228870958841  
CAGGCGGG -0.148306648189  
CAGGCGTA -0.125721531637  
CAGGCGTC -0.148495673312  
CAGGCTAA -0.0960145243282  
CAGGCTAC -0.215423894227  
CAGGCTAG -0.214520143711  
CAGGCTCA -0.238242410687  
CAGGCTCC -0.258385045457  
CAGGCTCG -0.167344340736  
CAGGCTGA -0.159381416504  
CAGGCTGC -0.259487403165  
CAGGCTGG -0.204402470054  
CAGGCTTA -0.24919405898  
CAGGCTTC -0.346948627225  
CAGGGAAA 0.145832667471  
CAGGGAAC -0.0698852578068  
CAGGGAAG -0.153266069743  
CAGGGACA -0.203077322937  
CAGGGACC -0.28216374269  
CAGGGACG -0.15131798756  
CAGGGAGA -0.0497554831061  
CAGGGAGC -0.149194110675  
CAGGGAGG -0.20451203722  
CAGGGATA 0.093603366097  
CAGGGATC 0.181257536356  
CAGGGATG -0.282469827541  
CAGGGCAA -0.127724266623  
CAGGGCAC -0.214079479009  
CAGGGCAG -0.102268700073  
CAGGGCCA -0.197234567901  
CAGGGCCC -0.0880503144654  
CAGGGCCG -0.212884324182  
CAGGGCGA -0.220846054852  
CAGGGCGC -0.20495583806  
CAGGGCGG -0.124047109954  
CAGGGCTA -0.115816883708  
CAGGGCTC -0.308992559907  
CAGGGGAA -0.0408840491437  
CAGGGGAC -0.382304112768  
CAGGGGAG -0.138095943632

CAGGGGCA -0.187212475634  
CAGGGGCC -0.303489733259  
CAGGGGCG -0.167198257081  
CAGGGGGA -0.00249694056184  
CAGGGGGC -0.135466119669  
CAGGGGGG -0.359703687536  
CAGGGGTA -0.0974143040601  
CAGGGGTC -0.210669098767  
CAGGGTAA -0.00805451272256  
CAGGGTAC -0.134525590923  
CAGGGTAG -0.0395484265121  
CAGGGTCA -0.120887596483  
CAGGGTCC -0.283858742213  
CAGGGTCG -0.262161435617  
CAGGGTGA -0.322649229782  
CAGGGTGC -0.255181331161  
CAGGGTGG -0.0923996246728  
CAGGGTTA -0.184484055858  
CAGGGTTC -0.170781689793  
CAGGTAAA 0.03960164456  
CAGGTAAAC -0.240755373379  
CAGGTAAAG -0.148439900786  
CAGGTACA -0.24497864303  
CAGGTACC -0.127575557485  
CAGGTACG 0.0715163889438  
CAGGTAGA 0.0592186691925  
CAGGTAGC -0.0323112501779  
CAGGTAGG -0.227097152953  
CAGGTATA -0.224708187221  
CAGGTATC 0.187248848663  
CAGGTATG -0.0413208852006  
CAGGTCAA -0.0798006001749  
CAGGTCCAC -0.282897259239  
CAGGTCCAG -0.219805143322  
CAGGTCCA -0.27543010571  
CAGGTCCC -0.368927725118  
CAGGTCCG -0.306532656019  
CAGGTCCGA -0.196968121608  
CAGGTCCG -0.32700892533  
CAGGTCCG -0.194730573711  
CAGGTCTA 0.0644319853345  
CAGGTCTC -0.188599162647  
CAGGTGAA -0.161525225581  
CAGGTGAC -0.0754715264328  
CAGGTGAG -0.168632470191  
CAGGTGCA -0.10304721454  
CAGGTGCC -0.37406781433  
CAGGTGCG -0.135767404846  
CAGGTGGA -0.00294451756106  
CAGGTGGC -0.163264242165  
CAGGTGGG -0.0393489155524  
CAGGTGTA 0.0703939713276  
CAGGTGTC -0.240145976921  
CAGGTTAA -0.00975162623947



CAGGTTAC -0.13234640426  
CAGGTTAG -0.0891737510968  
CAGGTTCA -0.0673673964523  
CAGGTTCC -0.272339492313  
CAGGTTCG -0.171347744247  
CAGGTTGA -0.111693830661  
CAGGTTGC -0.140495435554  
CAGGTTGG 0.0445142395593  
CAGGTTTA -0.138609387939  
CAGGTTTC -0.108279921669  
CAGTAAAA 0.225085351503  
CAGTAAAC -0.0939812070517  
CAGTAAAG 0.086942309648  
CAGTAACA -0.109787556684  
CAGTAACC -0.194249666683  
CAGTAACG -0.0573926004265  
CAGTAAGA 0.178180523877  
CAGTAAGC -0.200427852523  
CAGTAAGG 0.00729737190011  
CAGTAATA 0.0533741083492  
CAGTAATC 0.377634274258  
CAGTAATG -0.016358756504  
CAGTACAA 0.238572745834  
CAGTACAC -0.192046745358  
CAGTACAG -0.049546824064  
CAGTACCA -0.161278197552  
CAGTACCC -0.128610021786  
CAGTACCG -0.165659596843  
CAGTACGA 0.0412879536324  
CAGTACGC -0.170702730585  
CAGTACGG -0.104504474844  
CAGTACTA 0.000257144102393  
CAGTACTC 0.096091571714  
CAGTACTG -0.025320955955  
CAGTAGAA 0.189721508705  
CAGTAGAC -0.260941362373  
CAGTAGAG -0.106427359565  
CAGTAGCA -0.0205305537717  
CAGTAGCC -0.197601398845  
CAGTAGCG -0.181892252234  
CAGTAGGA 0.0739231377198  
CAGTAGGC -0.200229763527  
CAGTAGGG -0.227533607682  
CAGTAGTA 0.0854749901937  
CAGTAGTC -0.210563430522  
CAGTATAA 0.0805931524293  
CAGTATAC -0.00945486028959  
CAGTATAG 0.0427911063967  
CAGTATCA 0.134550288379  
CAGTATCC 0.259498410107  
CAGTATCG 0.156229443836  
CAGTATGA -0.0964964272778  
CAGTATGC -0.185551933799  
CAGTATGG -0.122507379088

CAGTATTA 0.0630749302948  
CAGTATTC -0.0327970976311  
CAGTCAAA 0.130127990935  
CAGTCAAC -0.255072201374  
CAGTCAAG -0.246374180505  
CAGTCACA -0.101274262854  
CAGTCACC 0.0777322224418  
CAGTCACG -0.095708785967  
CAGTCAGA -0.0864956673965  
CAGTCAGC -0.110794918056  
CAGTCAGG -0.216302106028  
CAGTCATA -0.09548762948  
CAGTCATC -0.223661008677  
CAGTCATG -0.035508463413  
CAGTCCAA -0.0462197325833  
CAGTCCAC -0.179360141337  
CAGTCCAG -0.254141614222  
CAGTCCCA -0.130297405983  
CAGTCCCC -0.261429679263  
CAGTCCCG -0.197533455138  
CAGTCCGA -0.0722125863236  
CAGTCCGC -0.232852173722  
CAGTCCGG -0.37735093379  
CAGTCCTA -0.0908886062821  
CAGTCCTC -0.141670297749  
CAGTCGAA -0.168881251943  
CAGTCGAC -0.0867231675137  
CAGTCGAG -0.167108476716  
CAGTCGCA -0.0243763892319  
CAGTCGCC -0.185673291684  
CAGTCGCG -0.117220082093  
CAGTCGGA -0.0161409372033  
CAGTCGGC -0.0405053149163  
CAGTCGGG -0.21014266118  
CAGTCGTA -0.129147673294  
CAGTCGTC -0.254018881627  
CAGTCTAA -0.185373868024  
CAGTCTAC -0.218506994177  
CAGTCTAG -0.0404339135891  
CAGTCTCA -0.139200385804  
CAGTCTCC -0.274876264944  
CAGTCTCG -0.243889615105  
CAGTCTGA -0.153122431136  
CAGTCTGC -0.179491648511  
CAGTCTGG -0.0857800770446  
CAGTCTTA 0.0911957452414  
CAGTCTTC 0.0231289380667  
CAGTGAAA -0.0211420667852  
CAGTGAAC -0.244081486839  
CAGTGAAG -0.344633449311  
CAGTGACA -0.174588049364  
CAGTGACC -0.213988467531  
CAGTGACG -0.0817664943418  
CAGTGAGA -0.0903445390603

CAGTGAGC -0.085182129546  
CAGTGAGG -0.237942033448  
CAGTGATA 0.0819708570017  
CAGTGATC 0.0363415803466  
CAGTGATG -0.14688967909  
CAGTGCAA 0.0277283853052  
CAGTGCAC -0.00187101714173  
CAGTGCAG -0.170696882635  
CAGTGCCA -0.11899156528  
CAGTGCCC -0.298540883718  
CAGTGCCG -0.129632716049  
CAGTGCGA -0.149147789631  
CAGTGCGC -0.0376361790291  
CAGTGCGG -0.0657700923013  
CAGTGCTA -0.0805306053476  
CAGTGCTC -0.0769976295126  
CAGTGGAA 0.000613047747994  
CAGTGGAC -0.149922539458  
CAGTGGAG 0.0250683470899  
CAGTGGCA -0.115882972768  
CAGTGGCC -0.134709397067  
CAGTGGCG -0.117097689323  
CAGTGGGA -0.0862834529847  
CAGTGGGC -0.119915982987  
CAGTGGGG -0.182610324983  
CAGTGGTA -0.0652445508481  
CAGTGGTC -0.23317533205  
CAGTGTA 0.180832729588  
CAGTGTAC 0.0536547524275  
CAGTGTAG 0.0412721934085  
CAGTGTC 0.198592965116  
CAGTGTC -0.168485112564  
CAGTGTCG -0.127102344864  
CAGTGTGA -0.0761075984105  
CAGTGTGC -0.245250030495  
CAGTGTGG -0.303252646405  
CAGTGTTA -0.0591533293815  
CAGTGTT -0.108263478274  
CAGTTAAA 0.246795868261  
CAGTTAAC -0.28651317414  
CAGTTAAG -0.0525721674197  
CAGTTACA -0.0190562666163  
CAGTTACC -0.0376026034024  
CAGTTACG -0.0332558511179  
CAGTTAGA 0.0447677226723  
CAGTTAGC -0.102632488764  
CAGTTAGG -0.0601701341375  
CAGTTATA -0.0240539472384  
CAGTTATC 0.0293283057806  
CAGTTATG 0.0198698298781  
CAGTTCAA -0.0256619245208  
CAGTTCAC -0.127372537398  
CAGTTCAG -0.199675752189  
CAGTTCCA -0.115951185016

CAGTTCCC -0.270988176044  
CAGTTCCG -0.023745877704  
CAGTTCGA 0.0103714787965  
CAGTTCGC -0.29699673009  
CAGTTCGG -0.189147421932  
CAGTTCTA -0.00116368602269  
CAGTTCTC -0.135821370561  
CAGTTGAA 0.00415761048541  
CAGTTGAC -0.140711355589  
CAGTTGAG -0.0809023662145  
CAGTTGCA -0.0933198133546  
CAGTTGCC -0.30248907731  
CAGTTGCG 0.123944817669  
CAGTTGGA 0.0972167336275  
CAGTTGGC -0.0438656126253  
CAGTTGGG -0.0423403251122  
CAGTTGTA 0.0741426815078  
CAGTTGTC -0.0659087937472  
CAGTTTAA 0.0236151264655  
CAGTTTAC -0.0995072861227  
CAGTTTAG 0.00665523803989  
CAGTTTCA -0.0645048358653  
CAGTTTCC -0.120787838992  
CAGTTTCG 0.00108523527959  
CAGTTTGA -0.0620527659871  
CAGTTTGC -0.133532285064  
CAGTTTGG -0.0691436507429  
CAGTTTTA 0.0834323652899  
CAGTTTTC 0.0642275351819  
CATAAAAA 0.101833422922  
CATAAAAC 0.080007244945  
CATAAAAG 0.122272168434  
CATAAACA -0.0780163584327  
CATAAACC -0.0773002936253  
CATAAACG -0.0543343432348  
CATAAAGA 0.106165647291  
CATAAAGC -0.085784343983  
CATAAAGG -0.119103670047  
CATAAATA 0.0454374091629  
CATAAATC 0.208102218413  
CATAAATG -0.102598610562  
CATAACAA 0.149273310062  
CATAACAC -0.0783337709982  
CATAACAG 0.00939098553206  
CATAACCA -0.10840776101  
CATAACCC -0.119032723641  
CATAACCG -0.0227118210714  
CATAACGA -0.002798076504  
CATAACGC 0.0789566114569  
CATAACGG 0.132938674487  
CATAACTA -0.132825663401  
CATAACTC -0.030099453336  
CATAAGAA 0.201808725466  
CATAAGAC -0.0669690882346

CATAAGAG 0.0142319260577  
CATAAGCA 0.107851447024  
CATAAGCC -0.34928467289  
CATAAGCG -0.144775373603  
CATAAGGA 0.0231934290544  
CATAAGGC -0.103358854038  
CATAAGGG -0.253879286694  
CATAAGTA -0.0466302500254  
CATAAGTC -0.272104209814  
CATAATAA 0.177500617436  
CATAATAC 0.157799837241  
CATAATAG -0.0995874072029  
CATAATCA 0.233555719066  
CATAATCC 0.264496680371  
CATAATCG 0.218778129048  
CATAATGA -0.00726826947327  
CATAATGC 0.104211462312  
CATAATGG 0.0337713231904  
CATAATTA 0.163356013905  
CATAATTC 0.13594787384  
CATACAAA 0.130825224736  
CATACAAC -0.00300774989572  
CATACAAG 0.0480423634013  
CATACACA 0.0860996905554  
CATACACC 0.126287075457  
CATACACG -0.0490817581067  
CATACAGA 0.196508474664  
CATACAGC -0.196538323012  
CATACAGG 0.0700783771323  
CATACATA 0.0994533359679  
CATACATC -0.082947778601  
CATACATG 0.0592381511998  
CATACCAA 0.117132099497  
CATACCAC -0.0422271617135  
CATACCAG -0.0308063068167  
CATACCCA 0.135611599644  
CATACCCC -0.179237336137  
CATACCCG -0.0507114870118  
CATACCGA -0.0937413740502  
CATACCGC -0.144277777778  
CATACCGG -0.151764060357  
CATACCTA 0.0408801011143  
CATACCTC -0.100547653541  
CATACGAA 0.245555184287  
CATACGAC 0.0212463500845  
CATACGAG -0.0121447373773  
CATACGCA 0.0731657116512  
CATACGCC -0.200536608183  
CATACGCG -0.172603448176  
CATACGGA 0.060603199047  
CATACGGC -0.0183948820305  
CATACGGG -0.0605837670339  
CATACGTA -0.0603690531076  
CATACGTC -0.20555111647

CATACTAA -0.208758699423  
CATACTAC -0.151297441142  
CATACTAG -0.0675041253167  
CATACTCA 0.0705009989242  
CATACTCC -0.239400873612  
CATACTCG -0.0891970278176  
CATACTGA -0.195728268264  
CATACTGC 0.00335078706448  
CATACTGG -0.0977373877063  
CATACTTA -0.054297762521  
CATACTTC 0.108463963506  
CATAGAAA -0.0776513005558  
CATAGAAC -0.0600133656822  
CATAGAAG 0.0128844760588  
CATAGACA -0.0340029088115  
CATAGACC -0.0867863492691  
CATAGACG -0.194526757101  
CATAGAGA -0.0485711795215  
CATAGAGC -0.169780682643  
CATAGAGG 0.00871314086733  
CATAGATA 0.23550477242  
CATAGATC 0.126597181058  
CATAGATG -0.168885234853  
CATAGCAA 0.0075211017971  
CATAGCAC -0.145182752509  
CATAGCAG -0.133289161056  
CATAGCCA -0.203810699588  
CATAGCCC -0.103047204067  
CATAGCCG -0.0270619863397  
CATAGCGA -0.046858873536  
CATAGCGC -0.174602575127  
CATAGCGG -0.193770259437  
CATAGCTA -0.00764698456607  
CATAGCTC -0.11820544799  
CATAGGAA 0.04195226127  
CATAGGAC 0.0957898101201  
CATAGGAG -0.129090454831  
CATAGGCA -0.0980498689647  
CATAGGCC -0.232247214509  
CATAGGCG -0.0796463905394  
CATAGGGA -0.203145751699  
CATAGGGC -0.205077665418  
CATAGGGG -0.132967320261  
CATAGGTA -0.201740014524  
CATAGGTC -0.218274509804  
CATAGTAA 0.154604613257  
CATAGTAC -0.0193088761553  
CATAGTAG -0.0344766076094  
CATAGTCA 0.0501550451415  
CATAGTCC -0.157024481234  
CATAGTCG -0.222543225729  
CATAGTGA -0.063363502971  
CATAGTGC -0.191325102881  
CATAGTGG 0.138202814551

CATAGTTA -0.0874308505384  
CATAGTTC -0.107802158451  
CATATAAA -0.0385848207425  
CATATAAC 0.0564035434367  
CATATAAG 0.0337109486487  
CATATACA 0.10067990644  
CATATACC -0.0319875299128  
CATATACG 0.0509334185638  
CATATAGA 0.128243759468  
CATATAGC -0.146913558726  
CATATAGG -0.0951011869307  
CATATATA 0.209804276713  
CATATATC 0.25770461481  
CATATATG 0.11080709819  
CATATCAA 0.121197776021  
CATATCAC 0.161458021876  
CATATCAG 0.181797974809  
CATATCCA 0.367960877297  
CATATCCC 0.211705141429  
CATATCCG 0.332812749699  
CATATCGA 0.189244984237  
CATATCGC 0.203851895761  
CATATCGG 0.264641959525  
CATATCTA 0.375013438322  
CATATCTC 0.325792004215  
CATATGAA 0.067187617812  
CATATGAC -0.104973259112  
CATATGAG 0.0825539528859  
CATATGCA -0.00352916639224  
CATATGCC 0.00502343629937  
CATATGCG -0.0194338783777  
CATATGGA 0.0971457859895  
CATATGGC -0.0175880572801  
CATATGGG 0.0111389684814  
CATATGTA 0.0231289380667  
CATATGTC -0.0180842240463  
CATATTAA -0.0547600714773  
CATATTAC 0.206088498101  
CATATTAG 0.0401051614745  
CATATTCA 0.126036929961  
CATATTCC 0.230963346069  
CATATTCT 0.156869380496  
CATATTGA 0.0629775077389  
CATATTGC 0.186922725477  
CATATTGG -0.016955530051  
CATATTTA 0.240342817625  
CATATTTT 0.308711497508  
CATCAAAA -0.0457172495554  
CATCAAAC -0.0184444224901  
CATCAAAG 0.158184301135  
CATCAACA 0.0208054276292  
CATCAACC -0.194083821626  
CATCAACG 0.0996152495115  
CATCAAGA 0.123150343586

CATCAAGC -0.199236348532  
CATCAAGG -0.24915076582  
CATCAATA 0.0291416935608  
CATCAATC -0.105433159894  
CATCAATG 0.00537451842339  
CATCACAA 0.0145662483944  
CATCACAC -0.149446976894  
CATCACAG -0.123733008457  
CATCACCA 0.10494665613  
CATCACCC -0.105266912507  
CATCACCG 0.0666962067613  
CATCACGA -0.169495897478  
CATCACGC -0.00598907484589  
CATCACGG -0.169389781432  
CATCACTA -0.1126078228  
CATCACTC 0.0311477749237  
CATCAGAA 0.109492539915  
CATCAGAC -0.0714200626413  
CATCAGAG -0.0932241802624  
CATCAGCA 0.0597021888516  
CATCAGCC -0.190935528121  
CATCAGCG -0.0289966910312  
CATCAGGA -0.0242083794549  
CATCAGGC -0.373975785264  
CATCAGGG -0.197277443906  
CATCAGTA -0.0793296819839  
CATCAGTC -0.0437114570659  
CATCATAA 0.0237284442055  
CATCATAC -0.178909825229  
CATCATAG -0.154165500513  
CATCATCA 0.0251899524937  
CATCATCC -0.0207089503456  
CATCATCG 0.117079957848  
CATCATGA -0.0877626292564  
CATCATGC -0.0985925925926  
CATCATGG -0.135564665273  
CATCATT A 0.026282451731  
CATCATTC -0.159741428509  
CATCCAAA 0.031468917525  
CATCCAAC 0.0490158949703  
CATCCAAG 0.0125245158572  
CATCCACA 0.0259860822571  
CATCCACC 0.00913370040533  
CATCCACG 0.0261952842387  
CATCCAGA 0.129470460383  
CATCCAGC -0.0449979082901  
CATCCAGG -0.129104414742  
CATCCATA -0.173830065359  
CATCCATC -0.239546469584  
CATCCATG -0.00215669811165  
CATCCCAA 0.0744424912469  
CATCCCAC -0.188181957892  
CATCCCAG -0.0580085133584  
CATCCCCA -0.0637697959611



CATCCCC -0.168555109108  
CATCCCCG 0.127059695204  
CATCCCGA 0.144336292185  
CATCCCGC 0.143084919537  
CATCCCGG -0.343607381078  
CATCCCTA -0.144386347131  
CATCCCTC -0.109212244943  
CATCCGAA -0.132240349832  
CATCCGAC -0.0980208883123  
CATCCGAG -0.0158891810614  
CATCCGCA 0.0465065267476  
CATCCGCC -0.258960219479  
CATCCGCG -0.0610490961178  
CATCCGGA 0.153879053708  
CATCCGGC -0.169213517094  
CATCCGGG 0.0159772991723  
CATCCGTA 0.049131155459  
CATCCGTC -0.156534479069  
CATCCTAA -0.164580917868  
CATCCTAC -0.125440416214  
CATCCTAG -0.114503373215  
CATCCTCA -0.00775153116665  
CATCCTCC -0.197500685871  
CATCCTCG -0.11586892981  
CATCCTGA -0.0339554233388  
CATCCTGC -0.00442309480094  
CATCCTGG -0.0475742121901  
CATCCTTA 0.0631956793783  
CATCCTTC -0.150346810659  
CATCGAAA 0.127437421004  
CATCGAAC -0.0152520510377  
CATCGAAG 0.023371057487  
CATCGACA -0.07796172941  
CATCGACC -0.223368942  
CATCGACG -0.194836782063  
CATCGAGA 0.122384612032  
CATCGAGC 0.00569716129882  
CATCGAGG -0.107073233798  
CATCGATA 0.0738642802144  
CATCGATC 0.0753170717534  
CATCGATG -0.0858247337843  
CATCGCAA 0.117927945729  
CATCGCAC -0.0136851348756  
CATCGCAG 0.00419130358985  
CATCGCCA -0.170460124392  
CATCGCCC -0.19896945545  
CATCGCCG -0.18225617284  
CATCGCGA 0.146293003139  
CATCGCGC 0.0658070983395  
CATCGCGG 0.0566340111413  
CATCGCTA -0.0899727469769  
CATCGCTC -0.199715627696  
CATCGGAA 0.0037953632352  
CATCGGAC -0.178625998548

CATCGGAG -0.1926920094  
CATCGGCA 0.0693606264437  
CATCGGCC -0.192809166337  
CATCGGCG -0.18479006492  
CATCGGGA -0.0754526227717  
CATCGGGC -0.0213553787199  
CATCGGGG -0.0911647404554  
CATCGGTA 0.0566377309098  
CATCGGTC 0.0363427298075  
CATCGTAA 0.117297861306  
CATCGTAC -0.0768760016685  
CATCGTAG -0.108112387953  
CATCGTCA 0.0323689872445  
CATCGTCC -0.230891031656  
CATCGTCG -0.039634715225  
CATCGTGA -0.0150349396365  
CATCGTGC -0.00501939476704  
CATCGTGG -0.0297536718699  
CATCGTTA 0.0713916290152  
CATCGTTC 0.0299976950179  
CATCTAAA -0.00780646721284  
CATCTAAC -0.00501882402011  
CATCTAAG 0.0836502840207  
CATCTACA -0.190209667418  
CATCTACC -0.0303937062775  
CATCTACG 0.16584757483  
CATCTAGA -0.0471666529459  
CATCTAGC 0.0538944511915  
CATCTAGG -0.0439745470922  
CATCTATA 0.0590956991372  
CATCTATC -0.070548725219  
CATCTCAA 0.00297095869714  
CATCTCAC -0.21485048011  
CATCTCAG -0.0515496729444  
CATCTCCA -0.0125085073218  
CATCTCCC -0.318864197531  
CATCTCCG -0.0600447825085  
CATCTCGA 0.042138218587  
CATCTCGC -0.129506477358  
CATCTCGG -0.073226897812  
CATCTCTA 0.0170338536521  
CATCTCTC 0.0297342844275  
CATCTGAA -0.0750592768228  
CATCTGAC 0.00310928889767  
CATCTGAG 0.165971263783  
CATCTGCA -0.0272975257415  
CATCTGCC -0.156095499915  
CATCTGCG 0.042995365595  
CATCTGGA 0.0209320099617  
CATCTGGC 0.0217439309633  
CATCTGGG -0.0945607484782  
CATCTGTA 0.01624656778  
CATCTGTC -0.104671199574  
CATCTTAA 0.187229686711

CATCTTAC -0.0571048770212  
CATCTTAG -0.0151605363257  
CATCTTCA 0.0111559862275  
CATCTTCC -0.0730094444719  
CATCTTCG -0.251938463058  
CATCTTGA -0.125873629359  
CATCTTGC 0.10753384053  
CATCTTGG -0.159255051752  
CATCTTTA 0.000440698149068  
CATCTTTC 0.0501520340732  
CATGAAAA 0.214046960416  
CATGAAAC 0.00784652710183  
CATGAAAG -0.124644464394  
CATGAACA 0.023112460593  
CATGAACC -0.21430355846  
CATGAACG 0.0656588242329  
CATGAAGA 0.154534128082  
CATGAAGC -0.170120883885  
CATGAAGG 0.0651916238641  
CATGAATA 0.0654679575841  
CATGAATC 0.0596559789636  
CATGAATG -0.0496230005956  
CATGACAA 0.0446646230732  
CATGACAC -0.0474873213462  
CATGACAG -0.181781872791  
CATGACCA -0.141516066153  
CATGACCC -0.244418401341  
CATGACCG -0.107601848194  
CATGACGA -0.0476582950561  
CATGACGC -0.172159122085  
CATGACGG -0.329379777328  
CATGACTA -0.0516755024312  
CATGACTC -0.094327399075  
CATGAGAA 0.140898987404  
CATGAGAC -0.0259179465653  
CATGAGAG 0.0541063152848  
CATGAGCA -0.0339764357212  
CATGAGCC -0.217439101252  
CATGAGCG -0.0758867102397  
CATGAGGA -0.153223557301  
CATGAGGC -0.216855702065  
CATGAGGG -0.0364618736383  
CATGAGTA 0.0884919283339  
CATGAGTC -0.168430814142  
CATGATAA 0.114263020095  
CATGATAC 0.201044479571  
CATGATAG 0.0859898131682  
CATGATCA 0.0667001470943  
CATGATCC 0.173019715032  
CATGATCG 0.0258901980155  
CATGATGA -0.16169133991  
CATGATGC -0.0587855935366  
CATGATGG -0.0689644153958  
CATGATTA 0.159633032558

CATGATTC 0.243887681517  
CATGCAAA 0.0374139019237  
CATGCAAC 0.0767785800415  
CATGCAAG 0.10962095765  
CATGCACA -0.126040873724  
CATGCACC -0.222731874753  
CATGCACG -0.101248466385  
CATGCAGA 0.111966924476  
CATGCAGC -0.214705446645  
CATGCAGG -0.165041071987  
CATGCATA -0.0731382686777  
CATGCATC -0.193383151937  
CATGCATG -0.0580452727542  
CATGCCAA 0.0305234472766  
CATGCCAC -0.0776299158834  
CATGCCAG -0.267435352987  
CATGCCCA -0.0968394305597  
CATGCCCC -0.195318399926  
CATGCCCG -0.0452357825302  
CATGCCGA 0.061845485082  
CATGCCGC -0.141949698995  
CATGCCGG -0.0593749512574  
CATGCCTA -0.27603557926  
CATGCCTC -0.105124183007  
CATGCGAA 0.105289316408  
CATGCGAC -0.0775641416739  
CATGCGAG -0.0519475308642  
CATGCGCA -0.0796311655491  
CATGCGCC -0.328022996829  
CATGCGCG -0.11352640678  
CATGCGGA 0.024706909043  
CATGCGGC -0.296864402155  
CATGCGGG -0.132159031819  
CATGCGTA -0.149070827778  
CATGCGTC -0.0620586419753  
CATGCTAA 0.0311434922203  
CATGCTAC -0.120776406036  
CATGCTAG -0.0708930001352  
CATGCTCA -0.166533042847  
CATGCTCC -0.222075438568  
CATGCTCG -0.0480724980955  
CATGCTGA -0.141832938233  
CATGCTGC -0.205844285792  
CATGCTGG -0.115650935329  
CATGCTTA -0.0747572209861  
CATGCTTC -0.110949229554  
CATGGAAA 0.134308935902  
CATGGAAC -0.327740197611  
CATGGAAG -0.0960671012775  
CATGGACA -0.0550177264096  
CATGGACC -0.280281055594  
CATGGACG -0.0773480208128  
CATGGAGA 0.0849826560407  
CATGGAGC -0.339395236058

CATGGAGG -0.0267239071155  
CATGGATA 0.304933680066  
CATGGATC 0.103772859997  
CATGGCAA 0.0117272275631  
CATGGCAC -0.153224345994  
CATGGCAG -0.202108746111  
CATGGCCA -0.0967324457562  
CATGGCCC -0.297801923317  
CATGGCCG -0.110143673007  
CATGGCGA -0.16017481463  
CATGGCGC -0.213721004236  
CATGGCGG -0.205827160494  
CATGGCTA -0.213055788763  
CATGGCTC -0.102321126699  
CATGGGAA 0.134278469341  
CATGGGAC -0.171180827887  
CATGGGAG -0.0552556496272  
CATGGGCA -0.0426492740024  
CATGGGCC -0.262104977286  
CATGGGCG -0.06683960989  
CATGGGGA -0.0864051190025  
CATGGGGC -0.218034346185  
CATGGGGG -0.0492137976455  
CATGGGTA -0.0689607859279  
CATGGGTC -0.21369932349  
CATGGTAA 0.129095957797  
CATGGTAC -0.0483426563247  
CATGGTAG -0.272213477076  
CATGGTCA -0.281755633467  
CATGGTCC -0.3138702136  
CATGGTCG -0.180720902909  
CATGGTGA -0.144287760545  
CATGGTGC -0.0738762102351  
CATGGTGG -0.257531885915  
CATGGTTA -0.000886320480314  
CATGGTTC -0.1477046401  
CATGTAAG 0.195041622478  
CATGTAAC 0.0887670420865  
CATGTAAG 0.0363344969154  
CATGTACA -0.0219790534532  
CATGTACC -0.0228054477421  
CATGTACG -0.238328858345  
CATGTAGA 0.121690377396  
CATGTAGC -0.150948595434  
CATGTAGG 0.0127033524336  
CATGTATA -0.0283211486531  
CATGTATC -0.0608355836572  
CATGTCAA -0.0951796376738  
CATGTCAC -0.133208193374  
CATGTCAG -0.130462940095  
CATGTCCA -0.018820914387  
CATGTCCC -0.0811269182638  
CATGTCCG -0.0779391105843  
CATGTCGA -0.249787348469

CATGTCGC -0.0328505222786  
CATGTCGG -0.215895919334  
CATGTCTA -0.0855230662847  
CATGTCTC 0.00983684663119  
CATGTGAA 0.152108461144  
CATGTGAC -0.169317003309  
CATGTGAG -0.206164110995  
CATGTGCA -0.00686103224867  
CATGTGCC -0.103777557689  
CATGTGCG 0.0881748246567  
CATGTGGA 0.0525576395043  
CATGTGGC -0.0769102023794  
CATGTGGG -0.207061844888  
CATGTGTA -0.0422793007876  
CATGTGTC -0.11247947932  
CATGTTAA 0.0631681652011  
CATGTTAC -0.0543481243654  
CATGTTAG -0.0877921926983  
CATGTTCA -0.115214113696  
CATGTTCC -0.0106397572445  
CATGTTCG -0.270691329975  
CATGTTGA 0.0472760104503  
CATGTTGC -0.15766190782  
CATGTTGG -0.0310380030297  
CATGTTTA 0.0140261037564  
CATGTTTC -0.0362453585603  
CATTAAAA -0.0722889706609  
CATTAAAC -0.0833454393315  
CATTAAAG -0.0599519199104  
CATTAAACA 0.113444132901  
CATTAAACC 0.0332936135533  
CATTAAACG 0.0345699137193  
CATTAAAGA -0.00585575202784  
CATTAAAGC -0.0970588923527  
CATTAAAGG -0.180796296296  
CATTAAATA 0.0377275434748  
CATTAAATC 0.135177894324  
CATTAAATG 0.0818092040292  
CATTACAA 0.102934638909  
CATTACAC 0.077539842808  
CATTACAG 0.000210654773147  
CATTACCA 0.235103801955  
CATTACCC -0.118921031148  
CATTACCG -0.151929311827  
CATTACGA 0.262663257449  
CATTACGC 0.0273925839413  
CATTACGG -0.0570045445564  
CATTACTA 0.0466418723577  
CATTACTC -0.062785707622  
CATTAGAA 0.139574041521  
CATTAGAC -0.217043949148  
CATTAGAG 0.0867213357704  
CATTAGCA -0.0292129035091  
CATTAGCC -0.197977432775

CATTAGCG 0.00672061365915  
CATTAGGA 0.0176238141589  
CATTAGGC -0.196897603486  
CATTAGGG -0.243867405241  
CATTAGTA -0.00893422665915  
CATTAGTC -0.160151619913  
CATTATAA -0.0373397431731  
CATTATAC -0.0273167585961  
CATTATAG 0.0959263725248  
CATTATCA 0.149820580245  
CATTATCC 0.0805064431305  
CATTATCG 0.0271076373251  
CATTATGA 0.172848778929  
CATTATGC 0.0526302790813  
CATTATGG -0.00706287033594  
CATTATTA 0.189904551596  
CATTATTC 0.271287514545  
CATTCAAA 0.162876792026  
CATTCAAC 0.0570450604107  
CATTCAAG -0.0296493885706  
CATTCACA 0.00301323849042  
CATTCACC -0.0503496234824  
CATTCACG -0.0949225010428  
CATTCAGA 0.0383687924718  
CATTCAGC -0.278322639661  
CATTCAGG -0.123456198304  
CATTCATA 0.142824211289  
CATTCATC -0.013027179521  
CATTCCAA 0.00633676368898  
CATTCCAC -0.201705362408  
CATTCCAG -0.186255952773  
CATTCCCA -0.0249577258543  
CATTCCCC -0.189099286495  
CATTCCCG -0.115016313237  
CATTCCGA 0.0467683154405  
CATTCCGC -0.0150434949645  
CATTCCGG -0.0329362369794  
CATTCCCTA -0.0301378734989  
CATTCCCTC -0.0345664987323  
CATTCGAA 0.143453097497  
CATTCGAC -0.219070114507  
CATTCGAG 0.0569247308704  
CATTCGCA -0.0122053957639  
CATTCGCC -0.127029774873  
CATTCGCG -0.0602075728741  
CATTCGGA -0.0652610259037  
CATTCGGC -0.115308641975  
CATTCGGG 0.133916337551  
CATTCGTA -0.0385357381499  
CATTCGTC -0.178778208484  
CATTCTAA -0.00643731930905  
CATTCTAC 0.128492147662  
CATTCTAG 0.0269129632589  
CATTCTCA -0.0472850604235

CATTCTCC -0.0248386353158  
CATTCTCG 0.0153080644458  
CATTCTGA 0.00690332440395  
CATTCTGC -0.134552169594  
CATTCTGG -0.0846394898306  
CATTCTTA -0.0161142246201  
CATTCTTC 0.0721470806154  
CATTGAAA 0.014994840721  
CATTGAAC 0.00314529368181  
CATTGAAG 0.0104854422217  
CATTGACA 0.0983720828119  
CATTGACC -0.0437138817544  
CATTGACG -0.175296629238  
CATTGAGA -0.112400288946  
CATTGAGC -0.189170660857  
CATTGAGG -0.0779011560173  
CATTGATA 0.160170527512  
CATTGATC -0.0349204781191  
CATTGCAA -0.0556625725795  
CATTGCAC -0.0287985555446  
CATTGCAG 0.138984208156  
CATTGCCA -0.0555055174297  
CATTGCCC -0.146367499644  
CATTGCCG -0.17705503696  
CATTGCGA 0.0918701785481  
CATTGCGC -0.0685443149136  
CATTGCGG -0.14136678628  
CATTGCTA -0.078160843843  
CATTGCTC -0.0764101550924  
CATTGGAA 0.0613558423055  
CATTGGAC -0.124479977688  
CATTGGAG 0.0830616478957  
CATTGGCA 0.0328011273662  
CATTGGCC -0.322954305167  
CATTGGCG -0.187474762733  
CATTGGGA 0.156109844339  
CATTGGGC -0.333827062967  
CATTGGGG -0.385570420102  
CATTGGTA -0.0136053927622  
CATTGGTC -0.106431517337  
CATTGTAA -0.0470739318151  
CATTGTAC 0.0310764231926  
CATTGTAG -0.101575095938  
CATTGTCA -0.1860358031  
CATTGTCC -0.18922085048  
CATTGTCT -0.0375425423213  
CATTGTGA -0.03730139129  
CATTGTGC -0.105293972368  
CATTGTGG -0.215825860949  
CATTGTTA -0.0420614237694  
CATTGTTC -0.140385688056  
CATTTAAA 0.0533374759826  
CATTTAAC 0.109003490746  
CATTTAAG 0.124066944634



CATTTACA 0.144876730638  
CATTTACC -0.116157624654  
CATTTACG -0.100505449636  
CATTTAGA 0.139635607033  
CATTTAGC 0.0060558546101  
CATTTAGG 0.104025335353  
CATTTATA 0.055643707399  
CATTTATC 0.0879607165168  
CATTTCAA 0.0173623116819  
CATTTCAC -0.186203810775  
CATTTCAG -0.096867781442  
CATTTCCA -0.133897832359  
CATTTCCC 0.0543617862083  
CATTTCCG 0.0578042572221  
CATTTCGA -0.0828147123712  
CATTTCGC 0.0975172341874  
CATTTCGG -0.1319063692  
CATTTCTA -0.120302630585  
CATTTCTC 0.0437852642209  
CATTTGAA 0.146500951578  
CATTTGAC -0.254179688862  
CATTTGAG 0.00164020164747  
CATTTGCA -0.00335594845496  
CATTTGCC -0.0644196359964  
CATTTGCG 0.017588947162  
CATTTGGA 0.0885639640826  
CATTTGGC -0.0927563194925  
CATTTGGG 0.165889907457  
CATTTGTA 0.0487716525061  
CATTTGTC -0.121761161246  
CATTTTAA -0.0383954642253  
CATTTTAC 0.170399384323  
CATTTTAG 0.198269725277  
CATTTTCA -0.0995461703401  
CATTTTCC -0.121365103958  
CATTTTCG 0.0285489253332  
CATTTTGA 0.121410390076  
CATTTTGC -0.171751400941  
CATTTTGG -0.0332005605576  
CATTTTTA 0.0138407449915  
CATTTTTTTC -0.0367053458375  
CCAAAAAA 0.0831999186437  
CCAAAAAC 0.154386704052  
CCAAAAAG -0.0625970747235  
CCAAAACA 0.0652608487208  
CCAAAACC -0.182424110385  
CCAAAACG 0.030711431645  
CCAAAAGA 0.0283431030319  
CCAAAAGC -0.134059244839  
CCAAAAGG -0.115838512024  
CCAAAATA 0.224562346549  
CCAAAATC 0.362236978605  
CCAAACAA 0.124456292767  
CCAAACAC 0.0646622986068

CCAAACAG 0.107362747519  
CCAAACCA -0.0131246775769  
CCAAACCC -0.192599542409  
CCAAACCG -0.104292542654  
CCAAACGA 0.0438583237691  
CCAAACGC -0.184891632373  
CCAAACGG -0.136177790949  
CCAAACTA 0.124788689104  
CCAAACTC -0.281291846154  
CCAAAGAA 0.067764331385  
CCAAAGAC -0.104320602037  
CCAAAGAG 0.072185176038  
CCAAAGCA -0.0303588912228  
CCAAAGCC -0.301690406833  
CCAAAGCG -0.090033494755  
CCAAAGGA -0.0187518520348  
CCAAAGGC -0.260452498121  
CCAAAGGG -0.14405152832  
CCAAAGTA -0.0420096360683  
CCAAAGTC -0.212708683197  
CCAAATAA 0.0655688405271  
CCAAATAC 0.125225032383  
CCAAATAG -0.258167029775  
CCAAATCA 0.165807701596  
CCAAATCC 0.375016465784  
CCAAATCG 0.183072076226  
CCAAATGA 0.0807737567736  
CCAAATGC 0.152327713012  
CCAAATGG -0.036342832683  
CCAAATTA 0.158750889835  
CCAAATTC 0.144791872489  
CCAACAAA 0.218157917847  
CCAACAAC -0.0361849327098  
CCAACAAG -0.204116369044  
CCAACACA -0.171898329702  
CCAACACC -0.176139433551  
CCAACACG -0.0857151481225  
CCAACAGA -0.001175308355  
CCAACAGC -0.10907768722  
CCAACAGG -0.142944159094  
CCAACATA 0.0475806274561  
CCAACATC 0.0303217414213  
CCAACCAA -0.126069096149  
CCAACCAC -0.0965676832298  
CCAACCAG -0.109649173775  
CCAACCCA -0.0360641836264  
CCAACCCC -0.319435003631  
CCAACCCG -0.189794412505  
CCAACCGA -0.130057676583  
CCAACCGC -0.225621870316  
CCAACCGG -0.17111544603  
CCAACCTA -0.306262890341  
CCAACCTC -0.218596322041  
CCAACGAA -0.0329672440668

CCAACGAC -0.227103362746  
CCAACGAG -0.209937996428  
CCAACGCA -0.18628220591  
CCAACGCC -0.146103949556  
CCAACGCG -0.0911580219582  
CCAACGGA -0.0334140077052  
CCAACGGC -0.318706808501  
CCAACGGG -0.119157738164  
CCAACGTA 0.0563733561659  
CCAACGTC -0.113048297965  
CCAACCTAA 0.0205991312307  
CCAACCTAC -0.21090065874  
CCAACCTAG -0.137811266157  
CCAACCTCA -0.0147915928201  
CCAACCTCC -0.0160225777308  
CCAACCTCG -0.214067781729  
CCAACCTGA -0.0657052073558  
CCAACCTGC 0.0460218665613  
CCAACCTGG 0.103938463458  
CCAACCTTA -0.13231590231  
CCAACCTTC -0.154342760516  
CCAAGAAA 0.0763049699999  
CCAAGAAC -0.238949710544  
CCAAGAAG -0.181683869162  
CCAAGACA -0.0726107933668  
CCAAGACC -0.328096797731  
CCAAGACG -0.0780735722606  
CCAAGAGA 0.0096886667732  
CCAAGAGC -0.0922171183334  
CCAAGAGG -0.146472098616  
CCAAGATA 0.250354014358  
CCAAGATC 0.285193148635  
CCAAGCAA -0.0659058881641  
CCAAGCAC -0.101713749506  
CCAAGCAG -0.00398726708927  
CCAAGCCA -0.191238841429  
CCAAGCCC -0.27407462269  
CCAAGCCG -0.121039978924  
CCAAGCGA -0.102438100882  
CCAAGCGC -0.404952480869  
CCAAGCGG -0.132465123426  
CCAAGCTA -0.220964262508  
CCAAGCTC -0.15097622831  
CCAAGGAA 0.024709154957  
CCAAGGAC -0.368517032831  
CCAAGGAG -0.25651206562  
CCAAGGCA -0.17536523227  
CCAAGGCC -0.205882352941  
CCAAGGCG -0.250184458969  
CCAAGGGA -0.0769760348584  
CCAAGGGC -0.29425706684  
CCAAGGGG -0.111558460421  
CCAAGGTA 0.0268201126148  
CCAAGGTC -0.129556143659

CCAAGTAA -0.0797355595073  
CCAAGTAC -0.113751249216  
CCAAGTAG -0.0703038068094  
CCAAGTCA -0.0189603823747  
CCAAGTCC -0.132945592303  
CCAAGTCG -0.120916465011  
CCAAGTGA 0.107749678949  
CCAAGTGC -0.074154288552  
CCAAGTGG -0.205001371742  
CCAAGTTA -0.0322509824585  
CCAAGTTC -0.153971938258  
CCAATAAA 0.0952408395354  
CCAATAAC -0.113155249258  
CCAATAAG -0.0531997733645  
CCAATACA -0.0787649809035  
CCAATACC -0.0488484928319  
CCAATACG -0.0434029795245  
CCAATAGA -0.100196398014  
CCAATAGC -0.0239714373532  
CCAATAGG -0.201360426646  
CCAATATA 0.196991152385  
CCAATATC 0.308016503712  
CCAATCAA -0.161244470787  
CCAATCAC 0.0639678642512  
CCAATCAG -0.0474516454807  
CCAATCCA 0.0064134229072  
CCAATCCC -0.0775414274758  
CCAATCCG 0.207753548443  
CCAATCGA -0.00366539305275  
CCAATCGC -0.0908299798062  
CCAATCGG -0.11887160067  
CCAATCTA 0.217658681156  
CCAATCTC 0.183294350094  
CCAATGAA -0.0839497707608  
CCAATGAC -0.0908265830287  
CCAATGAG -0.091834422658  
CCAATGCA -0.173834063244  
CCAATGCC -0.263037037037  
CCAATGCG 0.0485768073942  
CCAATGGA -0.055075350961  
CCAATGGC -0.153945224066  
CCAATGGG -0.21030355846  
CCAATGTA -0.0340142083013  
CCAATGTC 0.103358854038  
CCAATTAA -0.0492539915448  
CCAATTAC 0.0572211794922  
CCAATTAG -0.153831556071  
CCAATTCA -0.113571491705  
CCAATTCC 0.12308448045  
CCAATTCCG -0.095605662096  
CCAATTGA -0.0141378689182  
CCAATTGC 0.00296805311406  
CCAATTGG -0.146180363852  
CCAATTTA -0.0201458602705

CCAATTC -0.0146630250025  
CCACAAA 0.0389943776967  
CCACAAAC -0.133592395003  
CCACAAAG -0.145157495069  
CCACAACA 0.148253018174  
CCACAACC -0.148819172113  
CCACAACG 0.0816565570425  
CCACAAGA 0.0527133900088  
CCACAAGC -0.200357298475  
CCACAAGG -0.25466071938  
CCACAATA 0.122881466738  
CCACAATC 0.284353435126  
CCACACAA 0.165596443566  
CCACACAC -0.300232087304  
CCACACAG 0.0226322202463  
CCACACCA 0.0691370831412  
CCACACCC -0.158868914351  
CCACACCG -0.0210789479462  
CCACACGA -0.0747627708596  
CCACACGC -0.218044424821  
CCACACGG -0.281078729077  
CCACACTA -0.00823797371093  
CCCACTC -0.0917303652829  
CCACAGAA -0.00960731044702  
CCACAGAC -0.115216778666  
CCACAGAG -0.220204506525  
CCACAGCA -0.13852512603  
CCACAGCC -0.177546250576  
CCACAGCG -0.227184533699  
CCACAGGA 0.0623145874798  
CCACAGGC -0.10975223024  
CCACAGGG -0.201605238471  
CCACAGTA -0.247626115776  
CCACAGTC -0.208242323198  
CCACATAA -0.129067453111  
CCACATAC 0.0693072295769  
CCACATAG -0.0659356941769  
CCACATCA -0.17578002799  
CCACATCC 0.108369532056  
CCACATCG -0.283268031959  
CCACATGA 0.1638908663  
CCACATGC -0.266183534696  
CCACATGG 0.0507640123823  
CCACATTA -0.0804757729922  
CCACATTC 0.231500878939  
CCACCAA 0.107702693802  
CCACCAAC -0.081099683935  
CCACCAAG -0.124508723409  
CCACCACA -0.106720452238  
CCACCACC -0.12527491364  
CCACCACG -0.298957733344  
CCACCAGA -0.0615545077121  
CCACCAGC -0.0848764400796  
CCACCAGG -0.186409115207

CCACCATA 0.122066346133  
CCACCATC -0.125047332115  
CCACCCAA -0.168983551332  
CCACCCAC 0.0338016670589  
CCACCCAG -0.234987729972  
CCACCCCA -0.106998222047  
CCACCCCC 0.0794065354312  
CCACCCCG -0.113379389686  
CCACCCGA -0.18104788941  
CCACCCGC -0.25256824697  
CCACCCGG -0.00957534903317  
CCACCCTA 0.0407691287697  
CCACCCTC -0.205430547577  
CCACCGAA -0.0170692153183  
CCACCGAC -0.241359324237  
CCACCGAG -0.112112581764  
CCACCGCA -0.0527651329187  
CCACCGCC 0.00166892773209  
CCACCGCG -0.156855481858  
CCACCGGA 0.125208838784  
CCACCGGC -0.104949891068  
CCACCGGG -0.131524691358  
CCACCGTA 0.000461041954818  
CCACCGTC -0.169327129459  
CCACCTAA -0.115095240447  
CCACCTAC -0.19696934483  
CCACCTAG 0.0468888469194  
CCACCTCA 0.0509467358195  
CCACCTCC -0.338501555095  
CCACCTCG -0.172334145324  
CCACCTGA -0.0465227434515  
CCACCTGC -0.187377444928  
CCACCTGG -0.0656361122086  
CCACCTTA -0.161998593767  
CCACCTTC -0.255605837042  
CCACGAAA 0.0453700731009  
CCACGAAC -0.204313648023  
CCACGAAG -0.0137485400166  
CCACGACA -0.0958502090948  
CCACGACC -0.055892519971  
CCACGACG -0.0130560769205  
CCACGAGA 0.0137167097458  
CCACGAGC -0.384668334046  
CCACGAGG -0.127868596075  
CCACGATA 0.0687882265774  
CCACGATC 0.0956445309663  
CCACGCAA 0.115674877604  
CCACGCAC -0.249175925926  
CCACGCAG -0.231707852466  
CCACGCCA -0.128279835391  
CCACGCCC -0.291296332872  
CCACGCCG -0.29454028414  
CCACGCGA 0.0768793835819  
CCACGCGC -0.0854996350625

CCACGCGG -0.0905  
CCACGCTA 0.0868405453468  
CCACGCTC -0.175090411199  
CCACGGAA 0.0903418418491  
CCACGGAC 0.0322427495664  
CCACGGAG -0.13457412072  
CCACGGCA -0.0762636988745  
CCACGGCC -0.12202679264  
CCACGGCG -0.129436680767  
CCACGGGA -0.0577674592197  
CCACGGGC -0.163643149454  
CCACGGGG -0.112233306993  
CCACGGTA -0.138264926674  
CCACGGTC -0.241128828439  
CCACGTAA 0.0814565687969  
CCACGTAC -0.0636636377105  
CCACGTAG -0.219034935094  
CCACGTCA -0.0375502206415  
CCACGTCC -0.221227368861  
CCACGTCCG -0.187333366249  
CCACGTGA -0.116135175033  
CCACGTGC -0.326573260025  
CCACGTGG 0.0478930041152  
CCACGTTA 0.0828256383236  
CCACGTTC -0.308892169194  
CCACTAAA 0.019769337153  
CCACTAAC -0.143005690267  
CCACTAAG -0.146657994687  
CCACTACA -0.243031208335  
CCACTACC -0.203378235091  
CCACTACG -0.108758744509  
CCACTAGA 0.149883050281  
CCACTAGC -0.16295581844  
CCACTAGG -0.217365853942  
CCACTATA -0.22319355954  
CCACTATC -0.0741193549804  
CCACTCAA 0.0865276954489  
CCACTCAC 0.13627911031  
CCACTCAG -0.147340489754  
CCACTCCA -0.105804487161  
CCACTCCC -0.146320951216  
CCACTCCG -0.210453836298  
CCACTCGA -0.119382161201  
CCACTCGC -0.163626090468  
CCACTCGG 0.0516278035767  
CCACTCTA -0.0285866198697  
CCACTCTC -0.241445474432  
CCACTGAA -0.146410942507  
CCACTGAC 0.175160266965  
CCACTGAG -0.0574650548256  
CCACTGCA -0.047535307375  
CCACTGCC -0.0466837498075  
CCACTGCG -0.10988196948  
CCACTGGA -0.0189749102901

CCACTGGC -0.17126394924  
CCACTGGG -0.0805354989613  
CCACTGTA -0.10634109919  
CCACTGTC -0.278040803523  
CCACTTAA -0.0557119496027  
CCACTTAC 0.0760883883291  
CCACTTAG -0.137045701447  
CCACTTCA 0.0210257676793  
CCACTTCC -0.217864332045  
CCACTTCG -0.267986766086  
CCACTTGA -0.106459111182  
CCACTTGC -0.140511739949  
CCACTTTA 0.0063585369602  
CCACTTTC -0.0816622213441  
CCAGAAAA 0.0499736547454  
CCAGAAAC -0.0800049968624  
CCAGAAAG -0.125457471158  
CCAGAACA -0.132376907502  
CCAGAACC -0.0794199653121  
CCAGAACG -0.0293739995875  
CCAGAAGA 0.00267239272735  
CCAGAAGC -0.116314980578  
CCAGAAGG -0.231348442206  
CCAGAATA -0.0483188434433  
CCAGAATC 0.403482341319  
CCAGACAA -0.175485095922  
CCAGACAC -0.137558167611  
CCAGACAG -0.201330877996  
CCAGACCA -0.32894538147  
CCAGACCC -0.22261018949  
CCAGACCG -0.0571333706521  
CCAGACGA -0.162022525441  
CCAGACGC -0.147692203239  
CCAGACGG -0.140938271605  
CCAGACTA -0.254988614051  
CCAGACTC -0.263720147943  
CCAGAGAA 0.183518079991  
CCAGAGAC -0.170088129417  
CCAGAGAG -0.158356961908  
CCAGAGCA 0.0865037376634  
CCAGAGCC -0.0532502846566  
CCAGAGCG -0.226855051951  
CCAGAGGA -0.216097756503  
CCAGAGGC -0.298104695369  
CCAGAGGG -0.167430003457  
CCAGAGTA -0.000623966555393  
CCAGAGTC -0.110337372141  
CCAGATAA 0.029449054864  
CCAGATAC 0.344135878692  
CCAGATAG -0.0703171310018  
CCAGATCA -0.0236470878794  
CCAGATCC 0.192908924498  
CCAGATCG 0.311212645098  
CCAGATGA 0.109201981608



CCAGATGC -0.0277187812133  
CCAGATGG -0.182326797386  
CCAGATTA 0.298398428066  
CCAGATTC 0.475787776212  
CCAGCAAA 0.00668429387067  
CCAGCAAC -0.00761225165755  
CCAGCAAG 0.102875474763  
CCAGCACA -0.112916858767  
CCAGCACC -0.379695907588  
CCAGCACG -0.174092603407  
CCAGCAGA 0.106703180161  
CCAGCAGC -0.203713647361  
CCAGCAGG -0.195176604192  
CCAGCATA 0.0384188815334  
CCAGCATC -0.0506215526467  
CCAGCCAA 0.0488259405693  
CCAGCCAC -0.0512417332126  
CCAGCCAG -0.311697326309  
CCAGCCCA -0.144040966179  
CCAGCCCC -0.038118506984  
CCAGCCCG -0.256854256854  
CCAGCCGA 0.0425722847922  
CCAGCCGC -0.232322733557  
CCAGCCGG -0.051440125987  
CCAGCCTA -0.206399393494  
CCAGCCTC -0.144166241406  
CCAGCGAA 0.0300484595037  
CCAGCGAC -0.333134379511  
CCAGCGAG -0.0444394180472  
CCAGCGCA 0.0503786884095  
CCAGCGCC -0.219937238379  
CCAGCGCG -0.231228557402  
CCAGCGGA 0.0387096305551  
CCAGCGGC -0.176746227709  
CCAGCGGG -0.250343517327  
CCAGCGTA -0.0891737510968  
CCAGCGTC -0.135177336281  
CCAGCTAA -0.0804175285286  
CCAGCTAC -0.202346660522  
CCAGCTAG -0.311163844179  
CCAGCTCA -0.238913580247  
CCAGCTCC -0.298765736855  
CCAGCTCG -0.13939518674  
CCAGCTGA -0.0814054644449  
CCAGCTGC -0.162570962174  
CCAGCTGG -0.18321978673  
CCAGCTTA -0.107981616194  
CCAGCTTC -0.281883921181  
CCAGGAAA -0.0187243408198  
CCAGGAAC -0.00330154285034  
CCAGGAAG -0.127628330084  
CCAGGACA -0.017017771696  
CCAGGACC -0.365369529201  
CCAGGACG -0.144628824795

CCAGGAGA 0.0013968473512  
CCAGGAGC -0.324644770015  
CCAGGAGG -0.153634473033  
CCAGGATA 0.256070489445  
CCAGGATC 0.346964258271  
CCAGGCAA -0.0492927056732  
CCAGGCAC -0.325274568535  
CCAGGCAG -0.26595727171  
CCAGGCCA -0.196490296775  
CCAGGCCC -0.282786637919  
CCAGGCCG -0.149549223281  
CCAGGCGA 0.0713572196975  
CCAGGCGC -0.216257508336  
CCAGGCGG -0.0175650164908  
CCAGGCTA -0.05522630493  
CCAGGCTC -0.306630336766  
CCAGGGAA 0.0701730684865  
CCAGGGAC -0.136377353107  
CCAGGGAG -0.154885984023  
CCAGGGCA -0.25815315263  
CCAGGGCC -0.300230031281  
CCAGGGCG -0.172525391034  
CCAGGGGA -0.129643518519  
CCAGGGGC -0.132232538742  
CCAGGGGG -0.225691610043  
CCAGGGTA -0.130521878332  
CCAGGGTC -0.125873638344  
CCAGGTAA -0.135147697957  
CCAGGTAC -0.119219421263  
CCAGGTAG -0.133481669405  
CCAGGTCA -0.283258343088  
CCAGGTCC -0.353908855538  
CCAGGTCCG -0.389473913485  
CCAGGTGA -0.119061728395  
CCAGGTGC -0.347829441098  
CCAGGTTA -0.0717516650462  
CCAGGTTC -0.28569644154  
CCAGTAAA 0.0345691746691  
CCAGTAAC -0.194581632205  
CCAGTAAG -0.16833903727  
CCAGTACA 0.041205526419  
CCAGTACC -0.185903152806  
CCAGTACG -0.174705969495  
CCAGTAGA -0.0268231459127  
CCAGTAGC -0.0274539826797  
CCAGTAGG -0.0223078316129  
CCAGTATA -0.174915916361  
CCAGTATC 0.188219313411  
CCAGTCAA -0.103801025168  
CCAGTCAC -0.176134430727  
CCAGTCAG -0.393461599653  
CCAGTCCA -0.0684618491047  
CCAGTCCC -0.237909819994  
CCAGTCCG -0.117533924858

CCAGTCGA -0.106580499986  
CCAGTCGC -0.109116302552  
CCAGTCGG -0.256008386767  
CCAGTCTA -0.139768219007  
CCAGTCTC -0.173566870243  
CCAGTGAA -0.131933125895  
CCAGTGAC -0.356021330173  
CCAGTGAG -0.249392186878  
CCAGTGCA -0.0903939290933  
CCAGTGCC -0.245266819182  
CCAGTGCG -0.0912064945294  
CCAGTGGA -0.0017663327678  
CCAGTGGC -0.180360587538  
CCAGTGGG -0.176472040883  
CCAGTGTA -0.0845228099636  
CCAGTGTC -0.0655464467381  
CCAGTTAA -0.175955195539  
CCAGTTAC -0.0464397288353  
CCAGTTAG 0.00294066791819  
CCAGTTCA -0.0924334469304  
CCAGTTCC -0.182539290575  
CCAGTTCG -0.273369047342  
CCAGTTGA -0.0235143049713  
CCAGTTGC -0.108155217145  
CCAGTTTA -0.0272500108959  
CCAGTTTC -0.229179698217  
CCATAAAA 0.115251405576  
CCATAAAC -0.10590995598  
CCATAAAG -0.00197569890349  
CCATAACA -0.0415606192562  
CCATAACC -0.0444559693547  
CCATAACG 0.0820086295817  
CCATAAGA -0.0143471865464  
CCATAAGC -0.225304284677  
CCATAAGG -0.257840667753  
CCATAATA 0.143383260936  
CCATAATC 0.280105472666  
CCATACAA 0.0888977670594  
CCATACAC -0.00292267667786  
CCATACAG -0.0646922604153  
CCATACCA 0.0361533732903  
CCATACCC -0.000362229357043  
CCATACCG -0.181347775747  
CCATACGA 0.111468336408  
CCATACGC -0.161928201414  
CCATACGG -0.110585583829  
CCATACTA -0.187940051475  
CCATACTC -0.148871817817  
CCATAGAA -0.020396004149  
CCATAGAC -0.182433708407  
CCATAGAG -0.112016595051  
CCATAGCA -0.126647787766  
CCATAGCC -0.0412961865244  
CCATAGCG -0.0692811425948

CCATAGGA 0.0102499506026  
CCATAGGC -0.181526111029  
CCATAGGG -0.311770919067  
CCATAGTA -0.0862330830781  
CCATAGTC -0.263643996641  
CCATATAA -0.00819996048212  
CCATATAC 0.0432803135085  
CCATATAG -0.17784802138  
CCATATCA 0.199804057169  
CCATATCC 0.290757340229  
CCATATCG 0.255013335968  
CCATATGA 0.135568289095  
CCATATGC -0.0575975550236  
CCATATGG 0.0683724279835  
CCATATTA 0.00652727258546  
CCATATTC 0.186316156495  
CCATCAAA 0.0566283613964  
CCATCAAC -0.0983699678933  
CCATCAAG -0.208395309922  
CCATCACA -0.201184812016  
CCATCACC -0.037490994027  
CCATCACG -0.181098496293  
CCATCAGA -0.00489294181567  
CCATCAGC -0.223299067294  
CCATCAGG -0.0911548282704  
CCATCATA 0.0816890154432  
CCATCATC -0.000229137509948  
CCATCCAA -0.0812241221507  
CCATCCAC -0.113619274992  
CCATCCAG -0.0110746299014  
CCATCCCA -0.186911514685  
CCATCCCC -0.00380303254803  
CCATCCCG -0.0514234602046  
CCATCCGA -0.184349419536  
CCATCCGC -0.0564170946925  
CCATCCGG -0.0707446414461  
CCATCCTA -0.220677564324  
CCATCCTC 0.019791379135  
CCATCGAA -0.01276921557  
CCATCGAC -0.179182146415  
CCATCGAG -0.141213308744  
CCATCGCA 0.106058140717  
CCATCGCC -0.135805374001  
CCATCGCG 0.0683213962295  
CCATCGGA -0.177368103078  
CCATCGGC -0.200769284403  
CCATCGGG -0.2481315027  
CCATCGTA -0.180871093807  
CCATCGTC -0.0350604234581  
CCATCTAA -0.0587993150234  
CCATCTAC -0.182490064378  
CCATCTAG -0.163763517851  
CCATCTCA 0.0216264352675  
CCATCTCC -0.148505518065

CCATCTCG -0.144686157341  
CCATCTGA -0.0685244642024  
CCATCTGC -0.0926388529833  
CCATCTTA 0.0053273865733  
CCATCTTC -0.160803100379  
CCATGAAA 0.188504060552  
CCATGAAC -0.122811404159  
CCATGAAG 0.0313728395492  
CCATGACA -0.181105019674  
CCATGACC -0.255620808537  
CCATGACG -0.09751580403  
CCATGAGA -0.0858933941569  
CCATGAGC 0.0223838535266  
CCATGAGG -0.131308018961  
CCATGATA 0.220589869604  
CCATGATC 0.0497156907945  
CCATGCAA 0.091977685122  
CCATGCAC -0.124783918605  
CCATGCAG -0.0958959481977  
CCATGCCA -0.239128729669  
CCATGCCC -0.0528348531373  
CCATGCCG -0.222079568087  
CCATGCGA 0.0163316376089  
CCATGCGC -0.341970755224  
CCATGCGG -0.197072655903  
CCATGCTA -0.0572236763407  
CCATGCTC -0.227234815437  
CCATGGAA 0.0125185258374  
CCATGGAC -0.157906433326  
CCATGGAG -0.0768553272751  
CCATGGCA -0.0871243928542  
CCATGGCC -0.109179602834  
CCATGGCG -0.245287383809  
CCATGGGA 0.0329041252278  
CCATGGGC -0.16261768385  
CCATGGGG -0.360539179381  
CCATGGTA -0.119236638046  
CCATGGTC -0.204357455924  
CCATGTAA 0.169437624395  
CCATGTAC -0.172704243928  
CCATGTAG 0.0656771228272  
CCATGTCA -0.0866343178417  
CCATGTCC -0.117177946187  
CCATGTCCG -0.157847801869  
CCATGTGA -0.205586071276  
CCATGTGC -0.100031378747  
CCATGTTA 0.000629058736362  
CCATGTTC -0.099262890162  
CCATTAAC -0.0876019082927  
CCATTAAC 0.128760559206  
CCATTAAG -0.0792051879529  
CCATTACA -0.00515595717171  
CCATTACC 0.0743665415391  
CCATTACG 0.0256564359261

CCATTAGA -0.0320695653078  
CCATTAGC -0.08374828596  
CCATTAGG -0.182069440289  
CCATTATA 0.0333624228852  
CCATTATC 0.14427320029  
CCATTCAA -0.0462094021316  
CCATTCAC -0.0261489356448  
CCATTCAG -0.0422072932446  
CCATTCCA 0.0197690870688  
CCATTCCC -0.142832035278  
CCATTCCG -0.118093021769  
CCATTCGA 0.114950383104  
CCATTCGC -0.162131427061  
CCATTCGG -0.282498395141  
CCATTCTA -0.000991895834038  
CCATTCTC -0.0424726845678  
CCATTGAA 0.0348031789941  
CCATTGAC -0.139774872912  
CCATTGAG -0.154153206126  
CCATTGCA 0.0454207367033  
CCATTGCC -0.0830989843587  
CCATTGCG -0.0911683022679  
CCATTGGA -0.0609364235484  
CCATTGGC -0.197680059727  
CCATTGGG -0.249617302849  
CCATTGTA -0.121814342866  
CCATTGTC -0.250801130029  
CCATTTAA -0.00320808360227  
CCATTTAC -0.0703711020023  
CCATTTAG 0.134422442724  
CCATTTCA -0.0788189641924  
CCATTTCC -0.334398199172  
CCATTTCG -0.0725180574766  
CCATTTGA -0.284969676198  
CCATTTGC 0.0160083099676  
CCATTTTA -0.098920124573  
CCATTTTC -0.153645894259  
CCCAAAAA 0.226434348976  
CCCAAAAC -0.101873427431  
CCCAAAAG -0.165519663692  
CCCAAAACA 0.110910777405  
CCCAAAACC -0.205585455104  
CCCAAAACG -0.00770873125645  
CCCAAAGA 0.0127627736696  
CCCAAAGC -0.178216049383  
CCCAAAGG -0.0699130100711  
CCCAAATA -0.0539309315243  
CCCAAATC 0.201414959714  
CCCAACAA 0.0182528728953  
CCCAACAC -0.168581256773  
CCCAACAG -0.214617715327  
CCCAACCA -0.160087789375  
CCCAACCC -0.0124562346549  
CCCAACCG -0.0791267410847

CCCAACGA -0.198809005084  
CCCAACGC -0.0957927157032  
CCCAACGG 0.0271950238089  
CCCAACTA -0.108827855716  
CCCAACTC -0.131637143861  
CCCAAGAA 0.00482900917512  
CCCAAGAC -0.279448796257  
CCCAAGAG -0.216156378601  
CCCAAGCA -0.211146229443  
CCCAAGCC -0.248950669103  
CCCAAGCG -0.272497092194  
CCCAAGGA -0.128127713832  
CCCAAGGC -0.230150108631  
CCCAAGGG -0.0895946369857  
CCCAAGTA -0.147587509078  
CCCAAGTC -0.162451082078  
CCCAATAA 0.0756427823003  
CCCAATAC -0.0742121900622  
CCCAATAG -0.0386350539228  
CCCAATCA 0.0179065402094  
CCCAATCC 0.0749015733732  
CCCAATCG -0.0811231293525  
CCCAATGA -0.0664727961513  
CCCAATGC -0.248366335819  
CCCAATTA -0.0636191942818  
CCCAATTC -0.0590984434345  
CCCACAAA -0.168690889544  
CCCACAAC -0.11902527373  
CCCACAAG -0.264447846197  
CCCACACA 0.102666908165  
CCCACACC -0.0561839996487  
CCCACACG -0.199227962961  
CCCACAGA -0.123680180543  
CCCACAGC -0.273935907565  
CCCACAGG 0.0331401347999  
CCCACATA -0.229777777778  
CCCACATC -0.193506021821  
CCCACCAA -0.170415694795  
CCCACCAC -0.0428755716452  
CCCACCAG -0.183489090238  
CCCACCCA -0.0738728653584  
CCCACCCC -0.127455822074  
CCCACCCG -0.167176929534  
CCCACCGA -0.136610862857  
CCCACCGC 0.0242458931612  
CCCACCGG -0.145382798816  
CCCACCTA -0.133618923936  
CCCACCTC -0.118852578068  
CCCACGAA -0.0545210576575  
CCCACGAC -0.160318225651  
CCCACGAG 0.0218728937644  
CCCACGCA -0.112239480443  
CCCACGCC -0.284205282528  
CCCACGCG -0.293756044856

CCCACGGA -0.113100495038  
CCCACGGC -0.0661230857731  
CCCACGGG -0.166308417594  
CCCACGTA -0.166834172314  
CCCACGTC 0.0348364883123  
CCCCTAA -0.0387895551385  
CCCCTAC -0.145221475921  
CCCCTAG -0.108958770944  
CCCCTCA -0.0493100928976  
CCCCTCC -0.266522338014  
CCCCTCG 0.0197855679689  
CCCCTGA -0.0473857823443  
CCCCTGC -0.0563641962934  
CCCCTTA -0.00501673979496  
CCCCTTC -0.257355119395  
CCCAGAAA -0.106669397645  
CCCAGAAC -0.180689697241  
CCCAGAAG -0.00853908687845  
CCCAGACA -0.0827907692933  
CCCAGACC -0.0396562973592  
CCCAGACG -0.143712583547  
CCCAGAGA -0.134339742746  
CCCAGAGC -0.141030284074  
CCCAGAGG -0.2678686563  
CCCAGATA 0.260739761452  
CCCAGATC 0.304898813069  
CCCAGCAA 0.0375038135778  
CCCAGCAC -0.15893450076  
CCCAGCAG -0.0542491407587  
CCCAGCCA -0.263326139305  
CCCAGCCC -0.259841193315  
CCCAGCCG -0.0978704023793  
CCCAGCGA -0.0745715414629  
CCCAGCGC -0.21975308642  
CCCAGCGG -0.0466132156753  
CCCAGCTA -0.215630280686  
CCCAGCTC -0.279481474597  
CCCAGGAA -0.134861454047  
CCCAGGAC -0.32553657481  
CCCAGGAG -0.285605358632  
CCCAGGCA -0.201353891021  
CCCAGGCC -0.35110310251  
CCCAGGCG -0.0941060275962  
CCCAGGGA -0.0159757208557  
CCCAGGGC -0.34047556112  
CCCAGGGG -0.209392883079  
CCCAGGTA -0.18421572501  
CCCAGGTC -0.301800572117  
CCCAGTAA -0.0825225136234  
CCCAGTAC -0.157911401598  
CCCAGTAG 0.114344863656  
CCCAGTCA -0.269608085197  
CCCAGTCC -0.15602315935  
CCCAGTCG -0.0769050323473



CCCAGTGA -0.153456137752  
CCCAGTGC -0.0803386994152  
CCCAGTTA -0.286504370155  
CCCAGTTC -0.231270878722  
CCCATAAA -0.104552730273  
CCCATAAC 0.00799101682457  
CCCATAAG -0.169555840906  
CCCATACA -0.00164108981536  
CCCATACC -0.0486841744189  
CCCATACG -0.122585818207  
CCCATAGA 0.0307383708988  
CCCATAGC -0.133109808183  
CCCATAGG -0.167552768313  
CCCATATA -0.033311380039  
CCCATATC 0.291800444554  
CCCATCAA -0.186357799071  
CCCATCAC -0.109848561875  
CCCATCAG -0.235586042229  
CCCATCCA -0.180241476282  
CCCATCCC -0.122263346271  
CCCATCCG -0.173073424301  
CCCATCGA -0.0802064809326  
CCCATCGC -0.104888451158  
CCCATCGG -0.243399176955  
CCCATCTA -0.276947430805  
CCCATCTC -0.187009259259  
CCCATGAA 0.0456376649323  
CCCATGAC -0.25244916512  
CCCATGAG 0.0778536457804  
CCCATGCA -0.0360393997065  
CCCATGCC -0.192222222222  
CCCATGCG -0.142455066166  
CCCATGGA -0.0209187453692  
CCCATGGC -0.232614776024  
CCCATGGG -0.200222167366  
CCCATGTA -0.007854179016  
CCCATGTC -0.0894612685058  
CCCATTAA -0.0160498095646  
CCCATTAC -0.0197332674735  
CCCATTAG 0.110534808668  
CCCATTCA -0.0922685185185  
CCCATTCC -0.125028806584  
CCCATTCT -0.206269751136  
CCCATTGA -0.0432713959874  
CCCATTGC -0.188824139464  
CCCATTTA 0.0327605256659  
CCCATTTT -0.285043851112  
CCCCAAAA 0.0624135546335  
CCCCAAAC 0.0152855175459  
CCCCAAAG -0.181480749922  
CCCCAACA -0.1657794953  
CCCCAACC -0.223884932207  
CCCCAACG -0.122801997484  
CCCCAAGA -0.0419712234953

CCCCAAGC -0.153595416831  
CCCCAAGG -0.0168766504083  
CCCCAATA -0.104893147618  
CCCCAATC 0.0264934466179  
CCCCACAA -0.269859623027  
CCCCACAC 0.0151539800077  
CCCCACAG -0.117740023706  
CCCCACCA -0.0673495873392  
CCCCACCC -0.118466230937  
CCCCACCG -0.0811764705882  
CCCCACGA 0.124308573686  
CCCCACGC -0.142342935528  
CCCCACGG -0.126849673203  
CCCCACTA -0.178156696216  
CCCCACTC -0.100554320683  
CCCCAGAA -0.137923472189  
CCCCAGAC -0.0479969431679  
CCCCAGAG -0.221508916324  
CCCCAGCA 0.010876782843  
CCCCAGCC -0.180512347813  
CCCCAGCG -0.226990969219  
CCCCAGGA -0.254577616154  
CCCCAGGC -0.135882178658  
CCCCAGGG -0.25324577432  
CCCCAGTA -0.0826995258791  
CCCCAGTC -0.245870296307  
CCCCATAA -0.255373191447  
CCCCATAC 0.0619019946828  
CCCCATAG -0.103893965588  
CCCCATCA -0.141501266647  
CCCCATCC -0.311066479621  
CCCCATCG -0.0840823468541  
CCCCATGA 0.00200189269855  
CCCCATGC -0.0641486740884  
CCCCATTA 0.0919873061345  
CCCCATTC -0.173056268826  
CCCCCAA -0.0154379725247  
CCCCCAAC -0.106306463326  
CCCCCAAG -0.261815019641  
CCCCCACA -0.151903900171  
CCCCCACC -0.22464407902  
CCCCCACG -0.00935666738008  
CCCCCAGA 0.0510798276666  
CCCCCAGC -0.116843820917  
CCCCCAGG -0.187573048875  
CCCCCATA -0.2293141564  
CCCCCATC -0.288076123201  
CCCCCCAA -0.238684245177  
CCCCCCAC -0.221344039961  
CCCCCCAG -0.116139433551  
CCCCCCCA -0.0962560242626  
CCCCCCCC -0.158541910331  
CCCCCCCCG -0.360258116157  
CCCCCCGA -0.185771124051

CCCCCGC -0.237621374738  
CCCCCGG -0.22275048066  
CCCCCCTA -0.231533607682  
CCCCCCTC -0.305572663699  
CCCCCGAA 0.0366986071323  
CCCCCGAC -0.327956900761  
CCCCCGAG -0.104674579266  
CCCCCGCA -0.109577200435  
CCCCCGCC -0.222366651465  
CCCCCGCG -0.0128400460718  
CCCCCGGA -0.0799197530864  
CCCCCGGC -0.320224490685  
CCCCCGGG -0.161218973359  
CCCCCGTA 0.0143581637358  
CCCCCGTC -0.141690631808  
CCCCCTAA -0.261702399591  
CCCCCTAC -0.203534989658  
CCCCCTAG -0.107445170661  
CCCCCTCA -0.349032385466  
CCCCCTCC -0.164178410847  
CCCCCTCG -0.252066403731  
CCCCCTGA -0.149028127941  
CCCCCTGC -0.21022437322  
CCCCCTTA -0.387540262735  
CCCCCTTC -0.0403311546841  
CCCCGAAA 0.0695852702295  
CCCCGAAC -0.0849987927477  
CCCCGAAG -0.235327521952  
CCCCGACA -0.163729259435  
CCCCGACC -0.277185624917  
CCCCGACG -0.129716515211  
CCCCGAGA -0.0727000726216  
CCCCGAGC -0.227750926561  
CCCCGAGG -0.150592592593  
CCCCGATA 0.148749872881  
CCCCGATC 0.108259786164  
CCCCGCAA -0.00952848927297  
CCCCGCAC -0.167728826754  
CCCCGCAG -0.160918499495  
CCCCGCCA 0.00321019359937  
CCCCGCCC -0.297219430875  
CCCCGCCG -0.212942050945  
CCCCGCGA 0.092989215778  
CCCCGCGC -0.185485393604  
CCCCGCGG -0.0596061384443  
CCCCGCTA -0.279021137437  
CCCCGCTC -0.196885095405  
CCCCGGAA 0.0293545638645  
CCCCGGAC -0.141983772619  
CCCCGGAG -0.225923946509  
CCCCGGCA -0.210568132631  
CCCCGGCC -0.320935879042  
CCCCGGCG -0.28665725769  
CCCCGGGA -0.223997095134

CCCCGGGC -0.236604889503  
CCCCGGGG -0.0937260112856  
CCCCGGTA -0.197446623094  
CCCCGGTC -0.345838407777  
CCCCGTAA -0.0597299370163  
CCCCGTAC -0.10936238199  
CCCCGTAG -0.00393532240005  
CCCCGTCA 0.00702424709078  
CCCCGTCC -0.171451539445  
CCCCGTCCG -0.293265153187  
CCCCGTGA -0.139432798011  
CCCCGTGC -0.169438271605  
CCCCGTTA -0.0809698663405  
CCCCGTTC -0.248466392318  
CCCCTAAA 0.0119008418673  
CCCCTAAC -0.0761210165566  
CCCCTAAG -0.0623649104051  
CCCCTACA -0.0732250519373  
CCCCTACC -0.181487951212  
CCCCTACG -0.105469950393  
CCCCTAGA 0.0570174355428  
CCCCTAGC -0.223271501306  
CCCCTAGG -0.323384204336  
CCCCTATA -0.163747166933  
CCCCTATC -0.277668032989  
CCCCTCAA -0.31331211264  
CCCCTCAC -0.234554938847  
CCCCTCAG -0.240950139355  
CCCCTCCA -0.296196202959  
CCCCTCCC -0.246751714678  
CCCCTCCG -0.304003045683  
CCCCTCGA -0.121931735657  
CCCCTCGC -0.148894607964  
CCCCTCGG -0.277723561651  
CCCCTCTA -0.166803854427  
CCCCTCTC -0.1244155007  
CCCCTGAA -0.363606662117  
CCCCTGAC -0.231168367214  
CCCCTGAG -0.178946863917  
CCCCTGCA -0.232446037523  
CCCCTGCC -0.283102575944  
CCCCTGCG -0.0578854640058  
CCCCTGGA -0.184791164997  
CCCCTGGC -0.203686166056  
CCCCTGTA -0.00794531692647  
CCCCTGTC -0.24236566386  
CCCCTTAA -0.105945978925  
CCCCTTAC -0.291867717505  
CCCCTTAG -0.243507455317  
CCCCTTCA -0.128897955657  
CCCCTTCC -0.309781172405  
CCCCTTCG -0.282915816271  
CCCCTTGA -0.193886117833  
CCCCTTGC -0.269905578869

CCCCTTTA -0.0691048879669  
CCCCTTTC -0.0849442438572  
CCCGAAAA 0.0247167961895  
CCCGAAAC -0.110652903991  
CCCGAAAG -0.190483036645  
CCCGAACA -0.141653021442  
CCCGAACCC 0.0453522580079  
CCCGAACG -0.135608891523  
CCCGAAGA 0.0676090338832  
CCCGAAGC -0.276638481179  
CCCGAAGG -0.297184882248  
CCCGAATA 0.100854241425  
CCCGAATC 0.32795675689  
CCCGACAA -0.124879437418  
CCCGACAC -0.232275278051  
CCCGACAG -0.0396484353562  
CCCGACCA -0.290591488422  
CCCGACCC -0.118519927847  
CCCGACCG -0.329523010073  
CCCGACGA -0.175399176955  
CCCGACGC -0.28195241954  
CCCGACGG -0.0537743742301  
CCCGACTA -0.191814944667  
CCCGACTC -0.101626819469  
CCCGAGAA 0.187205264917  
CCCGAGAC -0.2768243834  
CCCGAGAG -0.0622648525998  
CCCGAGCA -0.030547735467  
CCCGAGCC -0.250913399822  
CCCGAGCG -0.175336504958  
CCCGAGGA 0.0951208803271  
CCCGAGGC -0.18441143063  
CCCGAGGG -0.23022632926  
CCCGAGTA -0.119320707195  
CCCGAGTC -0.201202684092  
CCCGATAA 0.0840047651562  
CCCGATAC 0.139972106402  
CCCGATAG -0.00739616172475  
CCCGATCA 0.103501174559  
CCCGATCC 0.118755538768  
CCCGATCG 0.14723088163  
CCCGATGA -0.0191688206209  
CCCGATGC -0.0853694008144  
CCCGATTA 0.288665320413  
CCCGATTC 0.309829587552  
CCCGCAAA 0.0554704907417  
CCCGCAAC -0.109832879116  
CCCGCAAG -0.216040391072  
CCCGCACA -0.12320579375  
CCCGCACC -0.178053250801  
CCCGCACG -0.188140544952  
CCCGCAGA -0.0790521068166  
CCCGCAGC -0.250258507511  
CCCGCAGG -0.0957576169078

CCCGCATA -0.00780323982616  
CCCGCATC -0.0251839869604  
CCCGCCAA -0.108817331753  
CCCGCCAC -0.0817568123817  
CCCGCCAG -0.0687407575269  
CCCGCCCA -0.0299717351335  
CCCGCCCC -0.294034854299  
CCCGCCCG 0.20532448099  
CCCGCCGA -0.118178649237  
CCCGCCGC -0.10226427592  
CCCGCCGG -0.267766081871  
CCCGCCTA -0.092250611595  
CCCGCCTC -0.250095870035  
CCCGCGAA -0.137759284868  
CCCGCGAC -0.215574759945  
CCCGCGAG -0.146869997937  
CCCGCGCA -0.141702470904  
CCCGCGCC -0.263506591291  
CCCGCGCG -0.0144334358916  
CCCGCGGA -0.0260161999309  
CCCGCGGC -0.0890313038515  
CCCGCGGG -0.113763168644  
CCCGCGTA 0.0790914241715  
CCCGCGTC -0.2050781893  
CCCGCTAA -0.191251267185  
CCCGCTAC -0.24303627238  
CCCGCTAG -0.0822426367692  
CCCGCTCA -0.105616704014  
CCCGCTCC -0.176754458162  
CCCGCTCG -0.271911786489  
CCCGCTGA 0.0152390831851  
CCCGCTGC -0.43047430391  
CCCGCTTA -0.179802469136  
CCCGCTTC -0.117001953554  
CCCGGAAA 0.0420539566778  
CCCGGAAC -0.1862696686  
CCCGGAAG -0.097  
CCCGGACA -0.130455876543  
CCCGGACC -0.239584019137  
CCCGGACG 0.0708905462807  
CCCGGAGA 0.0776967442942  
CCCGGAGC -0.235541006843  
CCCGGAGG -0.281110617357  
CCCGGATA 0.254425929423  
CCCGGATC 0.0418477902918  
CCCGGCAA -0.182673316216  
CCCGGCAC -0.264648399429  
CCCGGCAG -0.263576348278  
CCCGGCCA -0.158977060118  
CCCGGCCC -0.125356110545  
CCCGGCCG -0.0470746513109  
CCCGGCGA -0.234562477906  
CCCGGCGC -0.221103046462  
CCCGGCGG -0.284487014911

CCCGGCTA -0.237521599605  
CCCGGCTC -0.302633031093  
CCCGGGAA 0.0530651057103  
CCCGGGAC -0.185965287723  
CCCGGGAG -0.252504553734  
CCCGGGCA -0.0456594415011  
CCCGGGCC -0.237174739545  
CCCGGGCG -0.181537625913  
CCCGGGGA -0.125160525536  
CCCGGGGC -0.175174211248  
CCCGGGTA -0.0600255743247  
CCCGGGTC -0.285814599037  
CCCGGTAA -0.17321149255  
CCCGGTAC -0.249761086598  
CCCGGTAG -0.144003357527  
CCCGGTCA -0.146771901525  
CCCGGTCC -0.176573716059  
CCCGGTCCG -0.439640327672  
CCCGGTGA -0.16262531483  
CCCGGTGC -0.195000027436  
CCCGGTTA -0.19402608376  
CCCGGTTC -0.199575048733  
CCCGTAAA 0.0113637354176  
CCCGTAAC -0.0677897159061  
CCCGTAAG -0.200278867102  
CCCGTACA -0.154367097985  
CCCGTACC -0.145466721286  
CCCGTACG -0.144068587106  
CCCGTAGA -0.143113821162  
CCCGTAGC -0.199244734931  
CCCGTAGG 0.0130823878082  
CCCGTATA 0.107371003326  
CCCGTATC 0.242938922918  
CCCGTCAA -0.133379338399  
CCCGTCAC -0.165428388714  
CCCGTCAG -0.118975336014  
CCCGTCCA -0.191463501627  
CCCGTCCC -0.250801663743  
CCCGTCCG -0.204769899269  
CCCGTCGA -0.25422813178  
CCCGTCGC -0.297406920108  
CCCGTCGG -0.186524787675  
CCCGTCTA -0.270953631304  
CCCGTCTC -0.237696204296  
CCCGTGAA -0.0736339972575  
CCCGTGAC -0.21102712407  
CCCGTGAG -0.29983736768  
CCCGTGCA -0.0524141297337  
CCCGTGCC -0.235988380537  
CCCGTGCG -0.17175186701  
CCCGTGGA -0.0888163820304  
CCCGTGGC -0.146349425817  
CCCGTGTA -0.0702154396593  
CCCGTGTC -0.157805555556

CCCGTTAA 0.00560922813186  
CCCGTTAC -0.326096932626  
CCCGTTAG -0.195196084886  
CCCGTTCA -0.0985044862812  
CCCGTTCC -0.198476967981  
CCCGTTCG -0.146748971193  
CCCGTTGA 0.0199603698043  
CCCGTTGC -0.126405073809  
CCCGTTTA -0.248942334601  
CCCGTTTC 0.0861694245493  
CCCTAAAA 0.0958101492017  
CCCTAAAC -0.032462476248  
CCCTAAAG 0.0143632389984  
CCCTAACA -0.0564940588897  
CCCTAACC -0.283577971526  
CCCTAACG -0.0929677876682  
CCCTAAGA 0.0800008716749  
CCCTAAGC -0.131911647359  
CCCTAAGG -0.0304662309368  
CCCTAATA -0.0505005598367  
CCCTAATC 0.00996953980407  
CCCTACAA -0.0793663013134  
CCCTACAC -0.0663362539801  
CCCTACAG -0.193966594045  
CCCTACCA -0.299825144358  
CCCTACCC -0.120026378785  
CCCTACCG -0.110857301219  
CCCTACGA -0.113997256516  
CCCTACGC -0.244498727794  
CCCTACGG -0.173319615912  
CCCTACTA -0.164175459968  
CCCTACTC -0.0978580246914  
CCCTAGAA 0.163861810469  
CCCTAGAC -0.0500460443943  
CCCTAGAG -0.076893018283  
CCCTAGCA -0.129095538326  
CCCTAGCC -0.326078250661  
CCCTAGCG -0.0836560951869  
CCCTAGGA -0.000924691175099  
CCCTAGGC -0.206631771271  
CCCTAGGG -0.319092928794  
CCCTAGTA -0.0181826039712  
CCCTAGTC -0.118743808088  
CCCTATAA 0.0544580712761  
CCCTATAC -0.0396975288016  
CCCTATAG -0.0533737291815  
CCCTATCA -0.0117208939823  
CCCTATCC -0.253357693067  
CCCTATCG -0.0646003128344  
CCCTATGA -0.144359936784  
CCCTATGC -0.219979313107  
CCCTATTA -0.0929479170904  
CCCTATTC -0.0473665722628  
CCCTCAA -0.106207536194



CCCTCAAC -0.0836859232918  
CCCTCAAG -0.10821879611  
CCCTCACA -0.110090622189  
CCCTCACC -0.256029905543  
CCCTCACG -0.138375751308  
CCCTCAGA -0.0563539883226  
CCCTCAGC -0.265042813491  
CCCTCAGG -0.151444304393  
CCCTCATA -0.205827160494  
CCCTCATC -0.179764705882  
CCCTCCAA -0.292851125635  
CCCTCCAC -0.203111247956  
CCCTCCAG -0.150196231319  
CCCTCCCA -0.0915124680781  
CCCTCCCC -0.0484262232101  
CCCTCCCG -0.072956342116  
CCCTCCGA -0.151510162869  
CCCTCCGC -0.220233392587  
CCCTCCGG -0.173680602556  
CCCTCCTA -0.326534250483  
CCCTCCTC -0.230883732548  
CCCTCGAA -0.00404469469964  
CCCTCGAC -0.303010589048  
CCCTCGAG -0.311485285404  
CCCTCGCA -0.132298784336  
CCCTCGCC -0.361924273091  
CCCTCGCG -0.241592385732  
CCCTCGGA 0.148359459044  
CCCTCGGC -0.0977688884499  
CCCTCGTA -0.138601689409  
CCCTCGTC -0.103898491084  
CCCTCTAA -0.177587564237  
CCCTCTAC -0.262449458791  
CCCTCTAG -0.163151916239  
CCCTCTCA -0.248611659862  
CCCTCTCC -0.29818946439  
CCCTCTCG -0.0850775385223  
CCCTCTGA -0.0619937521608  
CCCTCTGC -0.0342445811258  
CCCTCTTA -0.153312999274  
CCCTCTTC -0.189686927169  
CCCTGAAA -0.143360564297  
CCCTGAAC -0.265246779468  
CCCTGAAG -0.0724027969879  
CCCTGACA -0.0808598402324  
CCCTGACC -0.326465216091  
CCCTGACG -0.0904316979422  
CCCTGAGA 0.0928522656284  
CCCTGAGC -0.293820455855  
CCCTGAGG -0.0887813818925  
CCCTGATA 0.1514083734  
CCCTGATC -0.0947396095087  
CCCTGCAA 0.0384132610812  
CCCTGCAC -0.0838519542955

CCCTGCAG -0.223415461084  
CCCTGCCA -0.0977254901961  
CCCTGCCC -0.0869889836614  
CCCTGCCG -0.324963990335  
CCCTGCGA -0.167442265795  
CCCTGCGC -0.158059506563  
CCCTGCGG -0.00804313822343  
CCCTGCTA -0.392670871666  
CCCTGCTC -0.0637177423572  
CCCTGGAA -0.0299405547065  
CCCTGGAC -0.270048619342  
CCCTGGAG -0.220315688985  
CCCTGGCA -0.320694822809  
CCCTGGCC -0.203997002031  
CCCTGGCG -0.211314128944  
CCCTGGGA -0.0328387306716  
CCCTGGGC -0.284949796835  
CCCTGGTA -0.334178924594  
CCCTGGTC -0.188157310028  
CCCTGTAA -0.0671563300812  
CCCTGTAC 0.0170851513405  
CCCTGTAG -0.125729847495  
CCCTGTCA -0.343327244001  
CCCTGTCC -0.164148521207  
CCCTGTCCG -0.0661376122534  
CCCTGTGA -0.101088173318  
CCCTGTGC -0.110049330282  
CCCTGTTA -0.024974939346  
CCCTGTTC -0.276465649232  
CCCTTAAA -0.0809457946387  
CCCTTAAC -0.121704676629  
CCCTTAAG -0.217121833177  
CCCTTACA -0.104455818433  
CCCTTACC -0.0790603691469  
CCCTTACG -0.211073860599  
CCCTTAGA 0.0506748216698  
CCCTTAGC -0.255142407234  
CCCTTAGG -0.333766696838  
CCCTTATA 0.00376870462739  
CCCTTATC -0.186948505202  
CCCTTCAA -0.218375126017  
CCCTTCAC -0.376055086628  
CCCTTCAG -0.0841184895947  
CCCTTCCA -0.0681231958027  
CCCTTCCC -0.256416214521  
CCCTTCCG -0.12923051899  
CCCTTCGA -0.113577625233  
CCCTTCGC -0.379374091445  
CCCTTCGG -0.246785516162  
CCCTTCTA -0.240190269274  
CCCTTCTC -0.139688815424  
CCCTTGAA -0.0828694773049  
CCCTTGAC -0.252438634713  
CCCTTGAG -0.0188399144723

CCCTTGCA 0.0848796771635  
CCCTTGCC -0.30512001394  
CCCTTGCG -0.0914395191629  
CCCTTGGA -0.17835739165  
CCCTTGGC -0.176554183813  
CCCTTGTA -0.00051592790182  
CCCTTGTC -0.22074144426  
CCCTTTAA -0.0460168491534  
CCCTTTAC -0.076287369946  
CCCTTTAG -0.240166307969  
CCCTTTCA -0.263718130476  
CCCTTTCC -0.230832318445  
CCCTTTCCG -0.200392808747  
CCCTTTGA -0.215560409429  
CCCTTTGC -0.126369826765  
CCCTTTTA -0.11452303009  
CCCTTTTC -0.236655114414  
CCGAAAAA -0.0927993194479  
CCGAAAAC 0.0575349033167  
CCGAAAAG 0.0447485125908  
CCGAAACA -0.0596527914993  
CCGAAACC -0.209466966226  
CCGAAACG 0.0560167361585  
CCGAAAGA 0.0865239902145  
CCGAAAGC -0.258130889976  
CCGAAAGG -0.281742459006  
CCGAAATA 0.17662603693  
CCGAAATC 0.460969302515  
CCGAACAA -0.00386652397025  
CCGAACAC -0.271986942303  
CCGAACAG -0.146296296296  
CCGAACCA -0.129073023915  
CCGAACCC -0.17343660589  
CCGAACCG -0.0330650277145  
CCGAACGA -0.176929602343  
CCGAACGC -0.155268784717  
CCGAACGG -0.153341070723  
CCGAACTA -0.152641625652  
CCGAACTC -0.0457403350553  
CCGAAGAA 0.0437973065245  
CCGAAGAC 0.0228792070078  
CCGAAGAG -0.304855967078  
CCGAAGCA -0.0622928055501  
CCGAAGCC -0.228371438447  
CCGAAGCG -0.102575288643  
CCGAAGGA -0.166663923318  
CCGAAGGC -0.138471616609  
CCGAAGTA -0.0966247400164  
CCGAAGTC -0.147764937003  
CCGAATAA 0.0422072932446  
CCGAATAC 0.0985878866241  
CCGAATAG -0.0762263053333  
CCGAATCA 0.209370677732  
CCGAATCC 0.362667615824

CCGAATCG 0.253077738875  
CCGAATGA -0.0125774471747  
CCGAATGC 0.0486184958023  
CCGAATTA 0.0863670041986  
CCGAATTC 0.189411403104  
CCGACAAA 0.0429111036857  
CCGACAAC -0.0102801378735  
CCGACAAG -0.0734843774515  
CCGACACA -0.207067655193  
CCGACACC -0.20911450189  
CCGACACG -0.0220543044032  
CCGACAGA 0.121647485923  
CCGACAGC -0.170930462268  
CCGACAGG 0.0412605106589  
CCGACATA 0.00289250795403  
CCGACATC -0.167734794431  
CCGACCAA -0.179685286603  
CCGACCAC -0.253064330611  
CCGACCAG -0.229051033834  
CCGACCCA -0.139526843483  
CCGACCCC -0.346537858091  
CCGACCCG -0.133023898874  
CCGACCGA -0.15510043877  
CCGACCGC -0.319697493375  
CCGACCGG -0.194746227709  
CCGACCTA -0.130482841564  
CCGACCTC -0.261627180868  
CCGACGAA 0.0728528617533  
CCGACGAC -0.264777689995  
CCGACGAG -0.277348329092  
CCGACGCA -0.294877156906  
CCGACGCC -0.374714062371  
CCGACGCG -0.211791433286  
CCGACGGA 0.0234625833539  
CCGACGGC -0.119352383387  
CCGACGTA 0.254414307091  
CCGACGTC 0.0582645852887  
CCGACTAA 0.0984776142338  
CCGACTAC -0.214259067244  
CCGACTAG -0.209050340707  
CCGACTCA 0.072693692507  
CCGACTCC -0.215695150927  
CCGACTCG -0.0178627286347  
CCGACTGA -0.0222013655624  
CCGACTGC -0.225325111033  
CCGACTTA -0.117908735647  
CCGACTTC -0.269628900294  
CCGAGAAA 0.107672192117  
CCGAGAAC 0.0162443126021  
CCGAGAAG -0.0473653625441  
CCGAGACA -0.144171728645  
CCGAGACC -0.257224757529  
CCGAGACG -0.276966109375  
CCGAGAGA 0.0276830281653

CCGAGAGC -0.125694444444  
CCGAGAGG -0.151937627223  
CCGAGATA 0.324362225296  
CCGAGATC 0.309475400203  
CCGAGCAA -0.0681819502473  
CCGAGCAC -0.138866293258  
CCGAGCAG 0.0172763430457  
CCGAGCCA -0.217621626367  
CCGAGCCC -0.129477408186  
CCGAGCCG -0.23975220581  
CCGAGCGA 0.0270961293734  
CCGAGCGC -0.14400245207  
CCGAGCGG -0.0799761830285  
CCGAGCTA -0.134537722908  
CCGAGCTC -0.127503171203  
CCGAGGAA 0.12053230282  
CCGAGGAC -0.243220474968  
CCGAGGAG -0.151944869643  
CCGAGGCA -0.067360929557  
CCGAGGCC -0.1191040648  
CCGAGGCG -0.0716978647042  
CCGAGGGA -0.00774299643793  
CCGAGGGC -0.104323234553  
CCGAGGTA -0.0461101506545  
CCGAGGTC -0.248781165144  
CCGAGTAA 0.0500819253027  
CCGAGTAC -0.102445799025  
CCGAGTAG -0.197331273019  
CCGAGTCA -0.142259748484  
CCGAGTCC -0.297412728978  
CCGAGTCG -0.305883696243  
CCGAGTGA -0.183915758896  
CCGAGTGC -0.23583851775  
CCGAGTTA 0.0376781485625  
CCGAGTTC -0.193526794287  
CCGATAAA 0.0984426074703  
CCGATAAC 0.102784912951  
CCGATAAG -0.173181628576  
CCGATACA -0.0876339572325  
CCGATACC 0.173853981427  
CCGATACG 0.202285241091  
CCGATAGA 0.137483808646  
CCGATAGC 0.0262882628972  
CCGATAGG -0.164049382716  
CCGATATA 0.23444714018  
CCGATATC 0.435579488193  
CCGATCAA -0.0536278771115  
CCGATCAC 0.011451952842  
CCGATCAG 0.0529897642765  
CCGATCCA 0.131025816106  
CCGATCCC 0.123556499594  
CCGATCCG -0.0149855447242  
CCGATCGA -0.00835350192631  
CCGATCGC 0.258159603678

CCGATCGG -0.180493957948  
CCGATCTA 0.0527152077982  
CCGATCTC 0.282066741243  
CCGATGAA 0.0629028358081  
CCGATGAC -0.133331299626  
CCGATGAG -0.162811132057  
CCGATGCA -0.00844969154098  
CCGATGCC -0.0326193699845  
CCGATGCG 0.0315735185158  
CCGATGGA -0.139467878429  
CCGATGGC -0.255990101998  
CCGATGTA 0.0775648203034  
CCGATGTC -0.155323574439  
CCGATTAA 0.0131782720497  
CCGATTAC 0.42932169163  
CCGATTAG 0.0140877195531  
CCGATTCA -0.00992788699002  
CCGATTCC 0.366732934901  
CCGATTCCG 0.244365348016  
CCGATTGA -0.0180108235087  
CCGATTGC 0.375746448879  
CCGATTTA 0.176636758126  
CCGATTTC 0.401219016883  
CCGCAAAA 0.14078888495  
CCGCAAAC -0.0231572939989  
CCGCAAAG -0.262904320988  
CCGCAACA 0.0280403294931  
CCGCAACC -0.0239275285956  
CCGCAACG -0.133310962554  
CCGCAAGA -0.0430330567628  
CCGCAAGC -0.0144712565194  
CCGCAAGG -0.29181202826  
CCGCAATA 0.230486830445  
CCGCAATC 0.477580520971  
CCGCACAA -0.0416713249804  
CCGCACAC -0.0306175816832  
CCGCACAG -0.0847521881981  
CCGCACCA -0.0474908623926  
CCGCACCC -0.213535540123  
CCGCACCG -0.0651206291979  
CCGCACGA 0.0700042811039  
CCGCACGC -0.0876616708479  
CCGCACGG -0.229208843571  
CCGCACTA -0.132927786284  
CCGCACTC -0.381305027565  
CCGCAGAA -0.101169033398  
CCGCAGAC -0.164454018063  
CCGCAGAG -0.197452849097  
CCGCAGCA -0.099023432394  
CCGCAGCC -0.252260407751  
CCGCAGCG 0.131944726918  
CCGCAGGA -0.150562091503  
CCGCAGGC -0.07475986542  
CCGCAGTA -0.183101760393

CCGCAGTC -0.118058158217  
CCGCATAA -0.00295323344925  
CCGCATAC 0.094554937312  
CCGCATAG -0.210329805387  
CCGCATCA -0.0923786555867  
CCGCATCC -0.0711753956287  
CCGCATCG -0.12903033701  
CCGCATGA -0.200392156863  
CCGCATGC -0.0855711589554  
CCGCATTA 0.0464471982915  
CCGCATTC -0.0190901906549  
CCGCCAAA -0.15611507865  
CCGCCAAC -0.00124062269381  
CCGCCAAG -0.148069666857  
CCGCCACA -0.124193982099  
CCGCCACC -0.209330428468  
CCGCCACG -0.105037451116  
CCGCCAGA 0.00540901007706  
CCGCCAGC -0.0438457866232  
CCGCCAGG -0.243188770405  
CCGCCATA -0.0852920838394  
CCGCCATC -0.227393091699  
CCGCCCAA -0.0490084941643  
CCGCCCAC -0.13124204311  
CCGCCCAG -0.311752474378  
CCGCCCCA -0.248807726194  
CCGCCCCC -0.148972940944  
CCGCCCCG -0.251611394644  
CCGCCCGA -0.082201590202  
CCGCCCGC 0.0946081942112  
CCGCCCGG -0.187805555556  
CCGCCCTA 0.00750839754989  
CCGCCCTC -0.00175077522571  
CCGCCGAA -0.135962236747  
CCGCCGAC -0.246909796562  
CCGCCGAG -0.0692153635117  
CCGCCGCA -0.186016957768  
CCGCCGCC 0.078795861804  
CCGCCGCG -0.135102986926  
CCGCCGGA -0.208193401817  
CCGCCGGC -0.292726075866  
CCGCCGTA 0.0408283666458  
CCGCCGTC -0.233603485839  
CCGCCTAA -0.23988671024  
CCGCCTAC -0.0434998572965  
CCGCCTAG -0.0529144490669  
CCGCCTCA -0.0949770336346  
CCGCCTCC -0.345673285569  
CCGCCTCG -0.170463648834  
CCGCCTGA 0.00257263966484  
CCGCCTGC -0.351014064888  
CCGCCTTA 0.053856919404  
CCGCCTTC -0.242724030161  
CCGCGAAA 0.0848564183626

CCGCGAAC -0.230784636488  
CCGCGAAG -0.261568472517  
CCGCGACA -0.0925488065949  
CCGCGACC -0.26402330634  
CCGCGACG -0.0950914542032  
CCGCGAGA -0.046477473787  
CCGCGAGC 0.0531230569873  
CCGCGAGG -0.313831502087  
CCGCGATA 0.251514852137  
CCGCGATC 0.371552888876  
CCGCGCAA 0.0600095501548  
CCGCGCAC -0.2361652976  
CCGCGCAG -0.0837991261301  
CCGCGCCA -0.132381986964  
CCGCGCCC -0.0988222803812  
CCGCGCCG -0.185066085694  
CCGCGCGA -0.0247002003238  
CCGCGCGC -0.0519388460779  
CCGCGCGG -0.179901423877  
CCGCGCTA -0.148516994077  
CCGCGCTC -0.211142383743  
CCGCGGAA 0.0582230125799  
CCGCGGAC -0.0981578427499  
CCGCGGAG -0.124965015393  
CCGCGGCA -0.00549133899756  
CCGCGGCC -0.234371059781  
CCGCGGCG -0.163075268463  
CCGCGGGA -0.0355877344634  
CCGCGGGC -0.109125214608  
CCGCGGTA -0.0297699408388  
CCGCGGTC -0.142096655581  
CCGCGTAA 0.0237720279517  
CCGCGTAC -0.0633924945394  
CCGCGTAG -0.0502794756781  
CCGCGTCA -0.108114782437  
CCGCGTCC -0.373857887186  
CCGCGTCG -0.0188216190853  
CCGCGTGA -0.142281191346  
CCGCGTGC -0.145420720765  
CCGCGTTA -0.205385547314  
CCGCGTTC -0.0117734536196  
CCGCTAAA -0.0490467252791  
CCGCTAAC -0.0882003446837  
CCGCTAAG -0.0708822222158  
CCGCTACA -0.254820148482  
CCGCTACC -0.10544166306  
CCGCTACG -0.0701350133347  
CCGCTAGA -0.0745844377494  
CCGCTAGC -0.144684272339  
CCGCTAGG -0.193125827968  
CCGCTATA -0.127710545814  
CCGCTATC -0.0285179802245  
CCGCTCAA 0.0683686798832  
CCGCTCAC -0.255123203792



CCGCTCAG -0.00338097433533  
CCGCTCCA -0.134379084967  
CCGCTCCC -0.249385893448  
CCGCTCCG 0.00891868725757  
CCGCTCGA -0.0234291691485  
CCGCTCGC -0.101092592593  
CCGCTCTA -0.17303960304  
CCGCTCTC -0.20722085048  
CCGCTGAA 0.026940767086  
CCGCTGAC -0.243512623299  
CCGCTGAG -0.221399258235  
CCGCTGCA -0.199509707102  
CCGCTGCC -0.295394272469  
CCGCTGCG -0.180910133382  
CCGCTGGA -0.0960102503908  
CCGCTGGC -0.269652624271  
CCGCTGTA -0.158032502235  
CCGCTGTC -0.177278300434  
CCGCTTAA -0.0624046605553  
CCGCTTAC -0.0606481454579  
CCGCTTAG -0.145637840774  
CCGCTTCA -0.122348816064  
CCGCTTCC -0.240873262507  
CCGCTTCG -0.118313112856  
CCGCTTGA -0.0433238533203  
CCGCTTGC -0.112510241674  
CCGCTTTA 0.051277185357  
CCGCTTTC 0.0419813171008  
CCGAAAA 0.0902662966891  
CCGAAAC -0.163618354625  
CCGAAAG -0.190351407256  
CCGAAACA -0.0459059451104  
CCGAAACC -0.167826733637  
CCGAAACG -0.113026491254  
CCGGAAGA 0.0211922761795  
CCGGAAGC -0.19937238379  
CCGGAAGG -0.148467291053  
CCGGAATA 0.143298974731  
CCGGAATC 0.38305725702  
CCGGACAA -0.0761004717968  
CCGGACAC -0.154633517192  
CCGGACAG 0.00327023375416  
CCGGACCA -0.275461537568  
CCGGACCC -0.18457152891  
CCGGACCG -0.155748725463  
CCGGACGA -0.122442820141  
CCGGACGC -0.208452241715  
CCGGACGG -0.082540351285  
CCGGACTA -0.168994700193  
CCGGACTC -0.251400479537  
CCGGAGAA 0.0742710618453  
CCGGAGAC 0.0440117801047  
CCGGAGAG -0.0714609431287  
CCGGAGCA -0.293673913878

CCGGAGCC -0.348514598413  
CCGGAGCG -0.187268121058  
CCGGAGGA -0.109045369502  
CCGGAGGC -0.261205977908  
CCGGAGTA 0.00345114453211  
CCGGAGTC -0.0932147256374  
CCGGATAA 0.134256514962  
CCGGATAC 0.307362747519  
CCGGATAG -0.0792149567584  
CCGGATCA -0.120836420515  
CCGGATCC 0.281034119657  
CCGGATCG 0.0984489231377  
CCGGATGA -0.0186154741129  
CCGGATGC 0.0289770357198  
CCGGATTA 0.227769443368  
CCGGATTC 0.453585698918  
CCGGCAAA -0.0401221228885  
CCGGCAAC -0.0612414427859  
CCGGCAAG -0.291929155013  
CCGGCACA -0.104901777265  
CCGGCACC -0.367138757537  
CCGGCACG -0.174593892138  
CCGGCAGA -0.0575148870777  
CCGGCAGC -0.274171751718  
CCGGCAGG -0.2046403851  
CCGGCATA -0.0979150888516  
CCGGCATC -0.222316953981  
CCGGCAA -0.103634378155  
CCGGCCAC -0.359427592316  
CCGGCCAG -0.00386966323471  
CCGGCCCA -0.155970951344  
CCGGCCCC -0.272018528468  
CCGGCCCG -0.273500231273  
CCGGCCGA 0.0784704384289  
CCGGCCGC -0.0341175373032  
CCGGCCGG -0.22178811068  
CCGGCCTA -0.299274472046  
CCGGCCTC -0.247478986986  
CCGGCGAA 0.0410142421997  
CCGGCGAC -0.256311235175  
CCGGCGAG -0.042227025645  
CCGGCGCA -0.0316110738265  
CCGGCGCC -0.0928540230244  
CCGGCGCG -0.116126136334  
CCGGCGGA -0.240187122205  
CCGGCGGC -0.379601744425  
CCGGCGTA -0.101578037462  
CCGGCGTC -0.265867713864  
CCGGCTAA -0.0773969257448  
CCGGCTAC -0.236135034726  
CCGGCTAG 0.0490073732048  
CCGGCTCA -0.260366013072  
CCGGCTCC -0.323948914803  
CCGGCTCG -0.189049076726

CCGGCTGA -0.148863318353  
CCGGCTGC -0.23083750013  
CCGGCTTA -0.289348799656  
CCGGCTTC -0.289208576998  
CCGGGAAA 0.0419932380513  
CCGGGAAC -0.349337460077  
CCGGGAAG -0.210821770689  
CCGGGACA -0.16320421859  
CCGGGACC -0.0697014951392  
CCGGGACG -0.23945698031  
CCGGGAGA -0.00314788828556  
CCGGGAGC -0.261867131403  
CCGGGAGG -0.192794967194  
CCGGGATA 0.175588377352  
CCGGGATC 0.239797346734  
CCGGGCAA -0.0574938977314  
CCGGGCAC -0.286031699008  
CCGGGCAG -0.217761493577  
CCGGGCCA -0.23573275236  
CCGGGCCC -0.284216835083  
CCGGGCCG -0.31756291494  
CCGGGCGA -0.030838194622  
CCGGGCGC -0.188310013717  
CCGGGCTA -0.289598434385  
CCGGGCTC -0.305324753294  
CCGGGGAA 0.189330608515  
CCGGGGAC -0.297757997299  
CCGGGGAG -0.186286128119  
CCGGGGCA -0.187667316439  
CCGGGGCC -0.240744398358  
CCGGGGCG -0.209472621419  
CCGGGGGA -0.135762916662  
CCGGGGGC -0.0626512569763  
CCGGGGTA 0.046082241103  
CCGGGGTC -0.220664000132  
CCGGGTAA -0.141363756091  
CCGGGTAC -0.061652835408  
CCGGGTAG -0.215679497159  
CCGGGTCA -0.274166095433  
CCGGGTCC -0.264178269313  
CCGGGTCCG -0.0934847984696  
CCGGGTGA 0.0373910513952  
CCGGGTGC -0.196498418532  
CCGGGTTA -0.0534530537546  
CCGGGTTC -0.22910331367  
CCGGTAAA 0.0405924483896  
CCGGTAAC -0.202193355738  
CCGGTAAG -0.249045751634  
CCGGTACA -0.179014594034  
CCGGTACC -0.227775034294  
CCGGTACG -0.139701040432  
CCGGTAGA -0.0585199259731  
CCGGTAGC -0.216589849108  
CCGGTAGG -0.0660595036243

CCGGTATA -0.0843442825389  
CCGGTATC 0.141589277481  
CCGGTCAA -0.0799731072144  
CCGGTCAC -0.07370000878  
CCGGTCAG -0.0370232644618  
CCGGTCCA -0.127098972738  
CCGGTCCC -0.283185725033  
CCGGTCCG 0.0406759753233  
CCGGTCGA -0.253534455801  
CCGGTCGC -0.263157665417  
CCGGTCTA -0.193544581619  
CCGGTCTC -0.234631873686  
CCGGTGAA -0.182094963627  
CCGGTGAC -0.180043578095  
CCGGTGAG -0.240790123457  
CCGGTGCA -0.233410150892  
CCGGTGCC -0.0519197752685  
CCGGTGCG -0.0918146236665  
CCGGTGGA -0.0985185185185  
CCGGTGGC -0.161039946765  
CCGGTGTA -0.14266571006  
CCGGTGTC -0.345179072962  
CCGGTTAA -0.100997208025  
CCGGTTAC -0.108004857415  
CCGGTTAG -0.121366922985  
CCGGTTCA -0.186928927742  
CCGGTTCC -0.0732436718411  
CCGGTTCCG -0.247307137252  
CCGGTTGA -0.249746215177  
CCGGTTGC -0.104253211811  
CCGGTTTA -0.0076785439856  
CCGGTTTC -0.0413147626809  
CCGTAAAA -0.0115191841123  
CCGTAAAC -0.0724675358438  
CCGTAAAG -0.165390946502  
CCGTAAACA 0.0603608202156  
CCGTAAACC -0.0936409141803  
CCGTAAACG -0.0912016013992  
CCGTAAAGA 0.0391222233522  
CCGTAAAGC -0.0604753533915  
CCGTAAAGG -0.222524005487  
CCGTAAATA 0.184512832334  
CCGTAAATC 0.467553353769  
CCGTACAA -0.0230209347261  
CCGTACAC -0.202113240265  
CCGTACAG -0.0272881853896  
CCGTACCA -0.150106328584  
CCGTACCC -0.142196649161  
CCGTACCG -0.0566038771433  
CCGTACGA -0.0283568245187  
CCGTACGC -0.0648742599086  
CCGTACGG 0.0405145170847  
CCGTACTA -0.114102772678  
CCGTACTC -0.0756221579766

CCGTAGAA 0.0413827669868  
CCGTAGAC -0.298744156956  
CCGTAGAG -0.241536351166  
CCGTAGCA -0.0727979758063  
CCGTAGCC -0.289428436165  
CCGTAGCG -0.288315311312  
CCGTAGGA -0.179985624853  
CCGTAGGC 0.0229700870222  
CCGTAGTA -0.0892899686794  
CCGTAGTC -0.120186009274  
CCGTATAA 0.0480105549128  
CCGTATAC 0.09653065929  
CCGTATAG -0.0248924341708  
CCGTATCA 0.226571933522  
CCGTATCC 0.336762285598  
CCGTATCG 0.2387706478  
CCGTATGA 0.103614545349  
CCGTATGC -0.0238280614498  
CCGTATTA 0.0494254209463  
CCGTATTC 0.109268810018  
CCGTCAAA -0.000444576170717  
CCGTCAAC -0.0388631596074  
CCGTCAAG -0.238290338603  
CCGTCACA -0.113651218797  
CCGTCACC -0.21902912565  
CCGTCACG -0.154879909548  
CCGTCAGA -0.170895355548  
CCGTCAGC -0.383675245878  
CCGTCAGG -0.089465162866  
CCGTCATA -0.00221728273099  
CCGTCATC -0.0780430121273  
CCGTCCAA -0.25436950482  
CCGTCCAC -0.211299872147  
CCGTCCAG -0.0748450693793  
CCGTCCCA 0.0454286619078  
CCGTCCCC -0.19387541715  
CCGTCCCG -0.15798800753  
CCGTCCGA -0.0966187363834  
CCGTCCGC -0.0626599728645  
CCGTCCTA -0.199869952426  
CCGTCCTC -0.267585507008  
CCGT CGAA 0.0587032646161  
CCGT CGAC -0.215411064821  
CCGT CGAG -0.184298521858  
CCGT CGCA -0.167319357613  
CCGT CGCC -0.307245539073  
CCGT CGCG -0.224007819512  
CCGT CGGA 0.0187206717708  
CCGT CGGC -0.056883795473  
CCGT CGTA -0.0628521203493  
CCGT CGTC -0.0718169934641  
CCGTCTAA -0.118643624594  
CCGTCTAC -0.184572503964  
CCGTCTAG -0.274579033134

CCGTCTCA -0.149451288762  
CCGTCTCC -0.302392942958  
CCGTCTCG -0.251225732244  
CCGTCTGA -0.0501141514922  
CCGTCTGC -0.3210956151  
CCGTCTTA -0.101493755683  
CCGTCTTC -0.201493751107  
CCGTGAAA -0.0856357988101  
CCGTGAAC -0.0795230646799  
CCGTGAAG -0.318362421253  
CCGTGACA -0.174235222952  
CCGTGACC -0.160168812495  
CCGTGACG -0.0957422083808  
CCGTGAGA -0.0847258578774  
CCGTGAGC -0.280458161866  
CCGTGAGG -0.200039780521  
CCGTGATA 0.0862807086873  
CCGTGATC 0.142829100118  
CCGTGCAA 0.0277497711853  
CCGTGCAC -0.15140872531  
CCGTGCAG -0.191358741907  
CCGTGCCA -0.176122085048  
CCGTGCCC -0.188455203307  
CCGTGCCG -0.248201250773  
CCGTGCGA -0.0899535473741  
CCGTGCGC -0.0407508026673  
CCGTGCTA -0.198925886768  
CCGTGCTC -0.199957104418  
CCGTGGAA -0.0217944084635  
CCGTGGAC -0.256401281563  
CCGTGGAG -0.0674432644549  
CCGTGGCA -0.196574170629  
CCGTGGCC -0.209807020245  
CCGTGGCG -0.131330841881  
CCGTGGGA -0.253215936056  
CCGTGGGC -0.0317740037482  
CCGTGGTA 0.117639794866  
CCGTGGTC -0.192811425948  
CCGTGTAA 0.0833525434148  
CCGTGTAC 0.0429713195205  
CCGTGTAG -0.134265417434  
CCGTGTCA -0.219947712418  
CCGTGTCC -0.189061106641  
CCGTGTCT -0.142295314334  
CCGTGTGA -0.095244734931  
CCGTGTGC -0.131267194023  
CCGTGTTA 0.135805500269  
CCGTGTTC -0.0875871712963  
CCGTTAAA 0.0642618388988  
CCGTTAAC -0.20443964408  
CCGTTAAG 0.198557378002  
CCGTTACA -0.0583208635393  
CCGTTACC -0.237750060273  
CCGTTACG -0.106510519557

CCGTTAGA 0.0623930382229  
CCGTTAGC -0.160214310404  
CCGTTAGG -0.212375944305  
CCGTTATA 0.051017680473  
CCGTTATC 0.179072537882  
CCGTTCAA -0.141001281236  
CCGTTCAC -0.0318032642936  
CCGTTCAG -0.139173850011  
CCGTTCCA -0.0369368531765  
CCGTTCCC -0.335502676702  
CCGTTCCG -0.244996626014  
CCGTTCGA -0.127173095301  
CCGTTCGC -0.211381043299  
CCGTTCTA -0.177455337691  
CCGTTCTC -0.103059578981  
CCGTTGAA -0.16081885788  
CCGTTGAC -0.142357167547  
CCGTTGAG 0.0481157654394  
CCGTTGCA 0.0407379289007  
CCGTTGCC -0.0369241182571  
CCGTTGCG -0.0855777250977  
CCGTTGGA -0.0792541368239  
CCGTTGGC -0.317665067212  
CCGTTGTA -0.124816845294  
CCGTTGTC -0.163925817705  
CCGTTTAA -0.134914685981  
CCGTTTAC -0.113659933824  
CCGTTTAG 0.0554850144553  
CCGTTTCA -0.118339971935  
CCGTTTCC -0.0262160968694  
CCGTTTCG 0.0371056444708  
CCGTTTGA 0.0968532535267  
CCGTTTGC -0.0844668725756  
CCGTTTTA -0.0999000578154  
CCGTTTTC -0.111909985036  
CCTAAAAA 0.0685827350765  
CCTAAAAC 0.0363317526181  
CCTAAAAG 0.00160796324655  
CCTAAACA 0.0186785408162  
CCTAAACC -0.144527305852  
CCTAAACG 0.0160809495445  
CCTAAAGA 0.151132451005  
CCTAAAGC -0.191801078393  
CCTAAAGG -0.0622009306818  
CCTAAATA 0.130496999985  
CCTAAATC 0.0372675580144  
CCTAACAA 0.0165464783167  
CCTAACAC -0.183918547418  
CCTAACAG 0.00173971264557  
CCTAACCA -0.131301275943  
CCTAACCC -0.0704246832814  
CCTAACCG -0.158485596708  
CCTAACGA -0.128167978311  
CCTAACGC 0.0162218703238

CCTAACTA -0.174088668926  
CCTAACTC -0.0312548025204  
CCTAAGAA 0.0432336604536  
CCTAAGAC -0.109654105135  
CCTAAGAG -0.168800227786  
CCTAAGCA -0.178243713436  
CCTAAGCC -0.0531422229582  
CCTAAGCG -0.123075604519  
CCTAAGGA -0.0115233045731  
CCTAAGGC -0.0383281183269  
CCTAAGTA 0.108678976654  
CCTAAGTC -0.141279022474  
CCTAATAA 0.0589097846488  
CCTAATAC -0.0112983597984  
CCTAATAG -0.129482650429  
CCTAATCA -0.129290285049  
CCTAATCC 0.13358854038  
CCTAATCG 0.0204889240159  
CCTAATGA -0.0300742376476  
CCTAATGC -0.226452942919  
CCTAATTA 0.194899081424  
CCTAATTC 0.104780017124  
CCTACAAA -0.186046917038  
CCTACAAC -0.0726584632371  
CCTACAAG 0.0970280727752  
CCTACACA -0.0523514887436  
CCTACACC -0.153092527445  
CCTACACG -0.22286458651  
CCTACAGA -0.0459254675348  
CCTACAGC 0.0154006980113  
CCTACAGG -0.264023349074  
CCTACATA -0.0151554769189  
CCTACATC -0.157606786953  
CCTACCAA -0.194251270879  
CCTACCAC -0.178927297668  
CCTACCAG -0.0974533432496  
CCTACCCA -0.146129359787  
CCTACCCC -0.183583104288  
CCTACCCG -0.0797662031802  
CCTACCGA 0.0974513484145  
CCTACCGC -0.249838134431  
CCTACCTA -0.171466215765  
CCTACCTC -0.142286129267  
CCTACGAA -0.16752461269  
CCTACGAC -0.17221744486  
CCTACGAG 0.160648422578  
CCTACGCA 0.0675765984339  
CCTACGCC -0.273242860919  
CCTACGCG -0.124330213838  
CCTACGGA -0.140743667413  
CCTACGGC -0.213407842685  
CCTACGTA -0.166506373599  
CCTACGTC -0.123383565902  
CCTACTAA -0.0968091991547



CCTACTAC -0.181786492375  
CCTACTAG -0.177351377159  
CCTACTCA 0.0721674196969  
CCTACTCC -0.0414841889207  
CCTACTCG 0.0552338502568  
CCTACTGA 0.00276756788168  
CCTACTGC -0.119235771555  
CCTACTTA 0.01341138115  
CCTACTTC -0.150643136222  
CCTAGAAA 0.122848470878  
CCTAGAAC 0.0404311078181  
CCTAGAAG -0.238279835391  
CCTAGACA -0.2014324331  
CCTAGACC -0.230465016978  
CCTAGACG -0.0817417981055  
CCTAGAGA -0.0831071932873  
CCTAGAGC -0.185240972119  
CCTAGAGG 0.00962844512496  
CCTAGATA 0.18753331236  
CCTAGATC 0.290786678696  
CCTAGCAA -0.00282374248786  
CCTAGCAC -0.090242791443  
CCTAGCAG -0.199249894371  
CCTAGCCA -0.242603290596  
CCTAGCCC -0.135745041867  
CCTAGCCG -0.187260324912  
CCTAGCGA -0.138342935337  
CCTAGCGC -0.10272935289  
CCTAGCTA -0.0547726699548  
CCTAGCTC -0.174764965651  
CCTAGGAA -0.105847198859  
CCTAGGAC 0.0150178444976  
CCTAGGAG -0.150155563238  
CCTAGGCA -0.143662714988  
CCTAGGCC -0.142231597664  
CCTAGGCG -0.194906744366  
CCTAGGGA -0.0786146026959  
CCTAGGGC -0.166315483343  
CCTAGGTA -0.128426950261  
CCTAGGTC -0.112936267564  
CCTAGTAA -0.0610781505134  
CCTAGTAC -0.207575483241  
CCTAGTAG -0.124370245975  
CCTAGTCA 0.0185042058315  
CCTAGTCC -0.130060856491  
CCTAGTCG -0.0882309363888  
CCTAGTGA -0.119188166155  
CCTAGTGC -0.162870897359  
CCTAGTTA -0.22949555808  
CCTAGTTC -0.158585110178  
CCTATAAA 0.151177852423  
CCTATAAC 0.119046097076  
CCTATAAG -0.0186523905685  
CCTATACA -0.0125423473221

CCTATACC -0.0959720975366  
CCTATACG -0.0710570069304  
CCTATAGA 0.0886740371624  
CCTATAGC 0.00941943506633  
CCTATAGG 0.0337340419801  
CCTATATA -0.0702183362972  
CCTATATC 0.0183678257434  
CCTATCAA 0.00237918827694  
CCTATCAC -0.121632066015  
CCTATCAG 0.0954027530791  
CCTATCCA -0.123397040183  
CCTATCCC -0.139624538081  
CCTATCCG -0.0402556208602  
CCTATCGA 0.06893126084  
CCTATCGC -0.0748007955181  
CCTATCTA 0.0590574288495  
CCTATCTC 0.121219473218  
CCTATGAA -0.000367556259352  
CCTATGAC -0.172608494465  
CCTATGAG -0.215191527925  
CCTATGCA -0.0825348216932  
CCTATGCC -0.128341460625  
CCTATGCG -0.245551198257  
CCTATGGA -0.146652344264  
CCTATGGC -0.28472751091  
CCTATGTA 0.0124460651141  
CCTATGTC 0.0342553716967  
CCTATTAA -0.11773856661  
CCTATTAC -0.000530268911714  
CCTATTAG -0.138274691358  
CCTATTCA -0.0274759050693  
CCTATTCC 0.0355101007606  
CCTATTCCG -0.0329042755655  
CCTATTGA -0.0734356306321  
CCTATTGC -0.145458005398  
CCTATTTA -0.079276246031  
CCTATTTT 0.166927200616  
CCTCAAAA 0.104032063065  
CCTCAAAC -0.0128523950078  
CCTCAAAG 0.000107027596654  
CCTCAACA 0.00288960237096  
CCTCAACC -0.0632061685246  
CCTCAACG -0.0904012467624  
CCTCAAGA -0.0100624929183  
CCTCAAGC -0.0534756717502  
CCTCAAGG -0.1205182972  
CCTCAATA -0.200941335923  
CCTCAATC -0.0550012074908  
CCTCACAA -0.0184344718376  
CCTCACAC -0.166888932793  
CCTCACAG -0.0580556104415  
CCTCACCA -0.0530713273061  
CCTCACCC -0.145241740333  
CCTCACCG -0.106783995434

CCTCACGA -0.109939354024  
CCTCACGC -0.233599379613  
CCTCACTA -0.129787509878  
CCTCACTC -0.140777573439  
CCTCAGAA 0.0316017672402  
CCTCAGAC -0.277032098765  
CCTCAGAG -0.233458423859  
CCTCAGCA -0.158718954248  
CCTCAGCC -0.252379855041  
CCTCAGCG -0.107496049188  
CCTCAGGA -0.0178399704822  
CCTCAGGC -0.170609148261  
CCTCAGTA -0.107417006119  
CCTCAGTC -0.0986967485532  
CCTCATAA -0.169509345491  
CCTCATAC -0.0402541093823  
CCTCATAG 0.0123821422864  
CCTCATCA -0.20288423548  
CCTCATCC -0.0895339138833  
CCTCATCG -0.0851075884271  
CCTCATGA -0.187094217024  
CCTCATGC -0.186817800168  
CCTCATT A 0.178880769398  
CCTCATTC -0.165904015714  
CCTCCAAA -0.200058672491  
CCTCCAAC -0.159326676989  
CCTCCAAG -0.290323731139  
CCTCCACA -0.195796848597  
CCTCCACC -0.331200933195  
CCTCCACG -0.185716559111  
CCTCCAGA -0.10053449528  
CCTCCAGC -0.261657860517  
CCTCCAGG -0.206630567762  
CCTCCATA -0.210826525546  
CCTCCATC -0.202358141143  
CCTCCCAA -0.100375327177  
CCTCCCAC -0.0847161859608  
CCTCCCAG -0.242234265948  
CCTCCCCA -0.124504332821  
CCTCCCCC -0.207113955157  
CCTCCCCG -0.12511665146  
CCTCCCCGA 0.0365275376636  
CCTCCCCGC -0.246322177776  
CCTCCCTA -0.152275962237  
CCTCCCTC -0.161537037037  
CCTCCGAA -0.100157499328  
CCTCCGAC -0.236078353917  
CCTCCGAG -0.422738941548  
CCTCCGCA -0.0905112923055  
CCTCCGCC -0.210209226771  
CCTCCGCG -0.0906369199528  
CCTCCGGA 0.180322290281  
CCTCCGGC -0.385394725294  
CCTCCGTA -0.14567694701

CCTCCGTC -0.369935935417  
CCTCCTAA -0.281943706234  
CCTCCTAC -0.21289209312  
CCTCCTAG -0.0832427938828  
CCTCCTCA -0.181302432253  
CCTCCTCC -0.189100664955  
CCTCCTCG -0.155497874986  
CCTCCTGA -0.103473251029  
CCTCCTGC -0.443569618587  
CCTCCTTA -0.115784856021  
CCTCCTTC -0.268200090623  
CCTCGAAA -0.029211309178  
CCTCGAAC -0.0353798323479  
CCTCGAAG -0.00188136504293  
CCTCGACA -0.079139710603  
CCTCGACC -0.282813920591  
CCTCGACG -0.158114381667  
CCTCGAGA 0.0655129408278  
CCTCGAGC -0.0921545385082  
CCTCGAGG -0.379879906834  
CCTCGATA 0.0436549329537  
CCTCGATC -0.203901234568  
CCTCGCAA 0.122639904279  
CCTCGCAC -0.0278038473148  
CCTCGCAG -0.230219950152  
CCTCGCCA -0.169799382716  
CCTCGCCC -0.169193540422  
CCTCGCCG -0.245437858153  
CCTCGCGA -0.184189152851  
CCTCGCGC -0.229094982172  
CCTCGCTA -0.192765589049  
CCTCGCTC -0.117002114951  
CCTCGGAA -0.0459915559725  
CCTCGGAC -0.104086750849  
CCTCGGAG -0.150069139217  
CCTCGGCA -0.0589019607843  
CCTCGGCC -0.202377270518  
CCTCGGCG -0.0512951983104  
CCTCGGGA -0.0724376389232  
CCTCGGGC -0.0304999259186  
CCTCGGTA -0.104741860084  
CCTCGGTC -0.176331154684  
CCTCGTAA 0.163106414953  
CCTCGTAC -0.0281838936635  
CCTCGTAG -0.0528666754467  
CCTCGTCA -0.052789527506  
CCTCGTCC -0.31868529194  
CCTCGTCG -0.156829826539  
CCTCGTGA -0.197540835953  
CCTCGTGC -0.158575478384  
CCTCGTTA -0.0207136432408  
CCTCGTTC -0.220152548477  
CCTCTAAA -0.0426031118795  
CCTCTAAC -0.135718892911

CCTCTAAG -0.116391908932  
CCTCTACA -0.174148033454  
CCTCTACC -0.100884953181  
CCTCTACG -0.222285319243  
CCTCTAGA -0.14674708505  
CCTCTAGC -0.125055555556  
CCTCTATA 0.104207284297  
CCTCTATC -0.226386625626  
CCTCTCAA -0.164193293496  
CCTCTCAC -0.150489808725  
CCTCTCAG -0.21321625299  
CCTCTCCA -0.132048641472  
CCTCTCCC -0.308088053785  
CCTCTCCG -0.199005604661  
CCTCTCGA -0.039592424938  
CCTCTCGC -0.176511260371  
CCTCTCTA -0.171212262068  
CCTCTCTC -0.216656499637  
CCTCTGAA -0.0310995749972  
CCTCTGAC -0.19186637618  
CCTCTGAG -0.0367164005637  
CCTCTGCA -0.0464673405995  
CCTCTGCC 0.0125965801835  
CCTCTGCG -0.0813909465021  
CCTCTGGA -0.0891171693226  
CCTCTGGC -0.318338641189  
CCTCTGTA -0.172469135802  
CCTCTGTC -0.111193581092  
CCTCTTAA -0.158513274439  
CCTCTTAC -0.0253410824635  
CCTCTTAG -0.256243553449  
CCTCTTCA -0.0607692054398  
CCTCTTCC -0.219367283951  
CCTCTTCG -0.198655760942  
CCTCTTGA -0.147898454092  
CCTCTTGC -0.101533134695  
CCTCTTTA 0.0778129676173  
CCTCTTTC -0.0746275594394  
CCTGAAAA -0.0107143375997  
CCTGAAAC -0.163061194251  
CCTGAAAG -0.0894398621469  
CCTGAACA -0.157815541031  
CCTGAACC -0.228660529351  
CCTGAACG -0.228068289452  
CCTGAAGA 0.0333157698303  
CCTGAAGC -0.279333102915  
CCTGAAGG -0.256207891676  
CCTGAATA 0.187394127817  
CCTGAATC 0.104738852664  
CCTGACAA -0.213896877269  
CCTGACAC -0.214392704887  
CCTGACAG -0.037550302907  
CCTGACCA -0.165057371097  
CCTGACCC -0.259625117267

CCTGACCG -0.0254233841685  
CCTGACGA -0.0668422930216  
CCTGACGC -0.0902833255382  
CCTGACTA -0.119234646301  
CCTGACTC -0.142784921931  
CCTGAGAA 0.0731657116512  
CCTGAGAC -0.20120589665  
CCTGAGAG -0.160898970414  
CCTGAGCA -0.197669569416  
CCTGAGCC -0.170653882016  
CCTGAGCG -0.189835513319  
CCTGAGGA -0.0279271584171  
CCTGAGGC -0.149027488211  
CCTGAGTA -0.185741335309  
CCTGAGTC -0.0821780509912  
CCTGATAA 0.0512472215362  
CCTGATAC 0.219378786338  
CCTGATAG -0.0610029857955  
CCTGATCA 0.0448942792214  
CCTGATCC -0.0534177479198  
CCTGATCG 0.00873854110674  
CCTGATGA -0.154069464338  
CCTGATGC -0.130970883094  
CCTGATTA 0.147293299524  
CCTGATTC 0.39492368863  
CCTGCAAA -0.0890517629625  
CCTGCAAC -0.132925954223  
CCTGCAAG -0.252945824715  
CCTGCACA -0.0235970472819  
CCTGCACC -0.161093748185  
CCTGCACG -0.122715347808  
CCTGCAGA -0.0491208139879  
CCTGCAGC -0.286245175007  
CCTGCAGG -0.143971561173  
CCTGCATA 0.196112977233  
CCTGCATC 0.0581886595092  
CCTGCCAA -0.160864197531  
CCTGCCAC -0.181700540569  
CCTGCCAG -0.0981797927916  
CCTGCCCA -0.284771935599  
CCTGCCCC -0.236785941581  
CCTGCCCG -0.25482450535  
CCTGCCGA -0.0825266693007  
CCTGCCGC -0.317110770969  
CCTGCCTA -0.153888888889  
CCTGCCTC -0.198741165108  
CCTGCGAA -0.0667157661702  
CCTGCGAC -0.263076333195  
CCTGCGAG -0.176396503186  
CCTGCGCA 0.0102691606841  
CCTGCGCC -0.222129764363  
CCTGCGCG -0.0195163263112  
CCTGCGGA 0.0817361522756  
CCTGCGGC -0.249320954121

CCTGCGTA -0.0834993223259  
CCTGCGTC -0.236192039899  
CCTGCTAA -0.245330394045  
CCTGCTAC -0.0777847054176  
CCTGCTAG -0.202988604129  
CCTGCTCA -0.134416201669  
CCTGCTCC -0.339365845583  
CCTGCTCG -0.127565555532  
CCTGCTGA -0.0820714040827  
CCTGCTGC -0.26256531349  
CCTGCTTA -0.0566158315178  
CCTGCTTC -0.284689651389  
CCTGGAAA 0.0886947274821  
CCTGGAAC -0.179996598248  
CCTGGAAG -0.0645675391799  
CCTGGACA -0.256579272207  
CCTGGACC -0.284461235397  
CCTGGACG -0.143797874359  
CCTGGAGA -0.0131587357851  
CCTGGAGC -0.191522115463  
CCTGGATA 0.248228320718  
CCTGGATC 0.213317740037  
CCTGGCAA -0.268497945435  
CCTGGCAC -0.157523504143  
CCTGGCAG -0.237359273158  
CCTGGCCA -0.170414266118  
CCTGGCCC 0.0152528583674  
CCTGGCCG -0.0492678650798  
CCTGGCGA -0.00114705963064  
CCTGGCGC -0.139424836601  
CCTGGCTA -0.213688408407  
CCTGGCTC -0.191583898116  
CCTGGGAA -0.192079677821  
CCTGGGAC -0.273741580768  
CCTGGGAG -0.117983878491  
CCTGGGCA -0.300342508023  
CCTGGGCC -0.173712282088  
CCTGGGCG -0.335807124519  
CCTGGGGA -0.0903065656111  
CCTGGGGC -0.279647035587  
CCTGGGTA -0.105091609462  
CCTGGGTC -0.31657587079  
CCTGGTAA -0.185840028096  
CCTGGTAC -0.111520697168  
CCTGGTAG -0.294456013779  
CCTGGTCA -0.0327762637209  
CCTGGTCC -0.159073347858  
CCTGGTCG -0.348855644427  
CCTGGTGA -0.00551742973194  
CCTGGTGC -0.0913029639508  
CCTGGTTA 0.0216053955867  
CCTGGTTC -0.287894964206  
CCTGTAAA -0.0438291729786  
CCTGTAAC -0.0672725476637

CCTGTAAG -0.143549919103  
CCTGTACA -0.0196481984578  
CCTGTACC -0.15708882931  
CCTGTACG -0.112749086844  
CCTGTAGA 0.0182612384115  
CCTGTAGC -0.282047669947  
CCTGTATA 0.0850827364781  
CCTGTATC 0.0432226832642  
CCTGTCAA -0.154748771988  
CCTGTCAC -0.0802926069677  
CCTGTCAG -0.0933586332554  
CCTGTCCA -0.269293019071  
CCTGTCCC -0.0511615678915  
CCTGTCCG -0.226621212958  
CCTGTCGA -0.208697167756  
CCTGTCGC -0.0843046226788  
CCTGTCTA -0.0584191546396  
CCTGTCTC -0.166466260627  
CCTGTGAA -0.0827214759208  
CCTGTGAC -0.105261169962  
CCTGTGAG -0.172249932781  
CCTGTGCA 0.0779778370546  
CCTGTGCC -0.175565767268  
CCTGTGCG -0.0931139318308  
CCTGTGGA -0.179009746589  
CCTGTGGC -0.377458562324  
CCTGTGTA -0.0340287362166  
CCTGTGTC -0.239877415071  
CCTGTTAA 0.0409778480318  
CCTGTTAC -0.0537968084639  
CCTGTTAG 0.0924396728313  
CCTGTTCA 0.00459640539017  
CCTGTTCC -0.231880240572  
CCTGTTCG -0.0481133887654  
CCTGTTGA -0.0860364662232  
CCTGTTGC -0.214014294997  
CCTGTTTA -0.129613382295  
CCTGTTTC -0.182895126783  
CCTTAAAA -0.0852602709479  
CCTTAAAC -0.134627434565  
CCTTAAAG 0.00568767887496  
CCTTAAACA -0.160740740741  
CCTTAAACC -0.0769380642683  
CCTTAAACG 0.00656984785615  
CCTTAAAGA -0.0723441095126  
CCTTAAAGC -0.318161369783  
CCTTAAAGG -0.0234594114162  
CCTTAAATA 0.0201603881859  
CCTTAAATC -0.00362417267608  
CCTTACAA -0.179854387583  
CCTTACAC -0.125644909877  
CCTTACAG 0.110058777042  
CCTTACCA -0.0683659743346  
CCTTACCC -0.106962553229



CCTTACCG -0.0055239976949  
CCTTACGA 0.0442215216539  
CCTTACGC -0.242914332861  
CCTTACTA 0.00428966963878  
CCTTACTC -0.202086068478  
CCTTAGAA 0.0614385541819  
CCTTAGAC -0.171626485549  
CCTTAGAG -0.178087225803  
CCTTAGCA -0.154162756622  
CCTTAGCC -0.135875469089  
CCTTAGCG -0.234688333498  
CCTTAGGA -0.0609547745994  
CCTTAGGC -0.143348642731  
CCTTAGTA -0.100999520579  
CCTTAGTC -0.0144953786033  
CCTTATAA 0.0700893543217  
CCTTATAC -0.154436817935  
CCTTATAG -0.0498292969942  
CCTTATCA 0.050389415794  
CCTTATCC -0.232238531431  
CCTTATCG -0.223640813728  
CCTTATGA -0.186884990253  
CCTTATGC -0.105818430113  
CCTTATTA 0.0264771257972  
CCTTATTC 0.080785379106  
CCTTCAAA -0.0999774967617  
CCTTCAAC -0.0918855135699  
CCTTCAAG -0.185476923415  
CCTTCACA -0.0619762315706  
CCTTCACC -0.331342342892  
CCTTCACG -0.0718892911309  
CCTTCAGA -0.278707334786  
CCTTCAGC -0.0643693678861  
CCTTCATA -0.0568643914325  
CCTTCATC -0.137708841028  
CCTTCCAA -0.260223231924  
CCTTCCAC -0.137666465243  
CCTTCCAG -0.0805930801146  
CCTTCCCA -0.324528053457  
CCTTCCCC -0.211979364853  
CCTTCCCG -0.157296296296  
CCTTCCGA -0.156809975978  
CCTTCCGC -0.177864197531  
CCTTCCTA -0.0851723797293  
CCTTCCTC -0.220009526548  
CCTTCGAA -0.140497212368  
CCTTCGAC -0.219264892269  
CCTTCGAG -0.0339024443786  
CCTTCGCA 0.0930124700872  
CCTTCGCC -0.269506676967  
CCTTCGCG -0.312726315096  
CCTTCGGA -0.116976034858  
CCTTCGGC -0.245530800085  
CCTTCGTA -0.259390584111

CCTTCGTC -0.253523806204  
CCTTCTAA -0.12492129241  
CCTTCTAC -0.125515216377  
CCTTCTAG -0.0844556400716  
CCTTCTCA -0.14350261923  
CCTTCTCC -0.236897649847  
CCTTCTCG -0.151706257099  
CCTTCTGA -0.122295209716  
CCTTCTGC -0.0498823529412  
CCTTCTTA -0.0388486324096  
CCTTCTTC -0.258197042704  
CCTTGAAA 0.0931631630177  
CCTTGAAC -0.340135494665  
CCTTGAAG -0.0971056011064  
CCTTGACA -0.103681220834  
CCTTGACC -0.0894442798029  
CCTTGACG -0.215139602054  
CCTTGAGA 0.0601685749644  
CCTTGAGC -0.266041988591  
CCTTGATA 0.0669900844611  
CCTTGATC 0.0674749030262  
CCTTGCAA 0.00209528067922  
CCTTGCAC -0.126832828482  
CCTTG CAG -0.171119825708  
CCTTGCCA -0.197998547567  
CCTTGCCC -0.285443451254  
CCTTGCCG -0.160816454557  
CCTTGCGA 0.0258704911195  
CCTTGCGC 0.0148954716488  
CCTTGCTA 0.0259252372291  
CCTTGCTC -0.331310394103  
CCTTGCAA 0.0326104854113  
CCTTG GAC -0.24375308642  
CCTTG GAG -0.108571362168  
CCTTG GCA -0.125504850959  
CCTTG GCC -0.222068602278  
CCTTG GCG -0.126784214945  
CCTTG GGA -0.164469728438  
CCTTG GGC -0.146219441709  
CCTTG GTA -0.100766454957  
CCTTG GTC -0.206268861454  
CCTTG TAA -0.0408510452835  
CCTTG TAC -0.173656046761  
CCTTG TAG -0.202134891193  
CCTTG TCA -0.147212620027  
CCTTG TCC -0.146006189912  
CCTTG TCG -0.21564658252  
CCTTG TGA -0.0415678866005  
CCTTG TGC -0.185579244291  
CCTTG TTA -0.0142689365252  
CCTTG TTC -0.112473668153  
CCTTTAAA -0.0726163950111  
CCTTTAAC 0.0507229823175  
CCTTTAAG -0.0536539453609

CCTTTACA 0.19388229483  
CCTTTACC -0.134543941974  
CCTTTACG -0.0703889418272  
CCTTTAGA -0.0484464857983  
CCTTTAGC -0.200993160832  
CCTTTATA 0.0822759432249  
CCTTTATC -0.10216175381  
CCTTTCAA -0.163412735075  
CCTTTCAC -0.0714028400772  
CCTTTCAG -0.138677609303  
CCTTTCCA -0.0559041394336  
CCTTTCCC -0.163253435182  
CCTTTCCG -0.213216776514  
CCTTTCGA -0.164438957476  
CCTTTCGC -0.193576734363  
CCTTTCTA -0.0286215632045  
CCTTTCTC -0.199229224954  
CCTTTGAA -0.100519692904  
CCTTTGAC 0.0116807428261  
CCTTTGAG 0.0131325868291  
CCTTTGCA -0.0683582002818  
CCTTTGCC -0.31166188887  
CCTTTGCG -0.142358971959  
CCTTTGGA -0.177777777778  
CCTTTGGC -0.231655039818  
CCTTTGTA -0.0392820304215  
CCTTTGTC -0.146210674219  
CCTTTTAA 0.144719829152  
CCTTTTAC -0.16469165062  
CCTTTTAG -0.0677582403108  
CCTTTTCA -0.00484663637262  
CCTTTTCC -0.0918903402637  
CCTTTTCG -0.043343347415  
CCTTTTGA 0.00305231502332  
CCTTTTGC -0.0742023509656  
CCTTTTTA 0.033343559957  
CCTTTTTC -0.291361473986  
CGAAAAAA 0.0493369777602  
CGAAAAAC -0.09508810063  
CGAAAAAG 0.10378597475  
CGAAAAACA 0.160502956431  
CGAAAAACC 0.0346185695815  
CGAAAAACG -0.133754815766  
CGAAAAAGA 0.0820050934159  
CGAAAAAGC -0.0467518496564  
CGAAAAATA 0.250562580957  
CGAAAAATC 0.421623329182  
CGAAACAA 0.0806411776329  
CGAAACAC -0.0977617599121  
CGAAACAG -0.14883968206  
CGAAACCA -0.107525200147  
CGAAACCC -0.151777336033  
CGAAACCG -0.227854039107  
CGAAACGA -0.0107109925575

CGAAACGC -0.179622678783  
CGAAACTA -0.0493482615735  
CGAAACTC -0.134471419068  
CGAAAGAA 0.0977408944214  
CGAAAGAC -0.117263578683  
CGAAAGAG -0.0534884801864  
CGAAAGCA -0.0618579612801  
CGAAAGCC -0.310694711895  
CGAAAGCG -0.154692670519  
CGAAAGGA -0.185135802469  
CGAAAGGC -0.211413217139  
CGAAAGTA 0.112340556324  
CGAAAGTC -0.180378891965  
CGAAATAA 0.183453533557  
CGAAATAC 0.12800059271  
CGAAATAG 0.0637413901924  
CGAAATCA 0.426375430389  
CGAAATCC 0.478975200848  
CGAAATCG 0.450786515621  
CGAAATGA -0.0547561149219  
CGAAATGC -0.0884299681839  
CGAAATTA 0.099105080412  
CGAAATTC 0.32913181409  
CGAACAAA 0.110561794488  
CGAACAAC -0.236649304396  
CGAACAAAG -0.0758369431637  
CGAACACA -0.116061578991  
CGAACACC 0.0541005041187  
CGAACACG -0.147923182442  
CGAACAGA 0.190915694507  
CGAACAGC -0.151456529136  
CGAACATA 0.0765839059753  
CGAACATC -0.00359565905888  
CGAACCAA 0.0254357513693  
CGAACCCAC -0.13954582678  
CGAACCCAG -0.171391879878  
CGAACCCA -0.212770129534  
CGAACCCC -0.0985277777778  
CGAACCCG -0.115307073988  
CGAACCGA -0.0348983534269  
CGAACCGC -0.0179999231711  
CGAACCTA -0.0664495549306  
CGAACCTC -0.290452914651  
CGAACGAA -0.0296732671829  
CGAACGAC -0.197666581449  
CGAACGAG -0.134173199063  
CGAACGCA -0.108861009582  
CGAACGCC -0.279023965142  
CGAACGCG 0.0435184270329  
CGAACGGA -0.0816515775034  
CGAACGGC -0.0563063390204  
CGAACGTA -0.0150963797229  
CGAACGTC -0.242802855325  
CGAACTAA -0.0702083127531

CGAACTAC 0.0222291633374  
CGAACTAG -0.136486256559  
CGAACTCA -0.138109739369  
CGAACTCC -0.118215044204  
CGAACTCG -0.104205456811  
CGAACTGA -0.208084241104  
CGAACTGC -0.127341563786  
CGAACTTA -0.179629345557  
CGAACTTC -0.115855063875  
CGAAGAAA 0.143371638604  
CGAAGAAC -0.282779396513  
CGAAGAAG -0.0632352214852  
CGAAGACA 0.0504830531867  
CGAAGACC -0.185112391378  
CGAAGACG -0.0976584793011  
CGAAGAGA -0.0108031872717  
CGAAGAGC -0.210210655122  
CGAAGATA 0.256934839404  
CGAAGATC 0.312625286974  
CGAAGCAA 0.0376926764779  
CGAAGCAC -0.179095523229  
CGAAGCAG -0.299251236563  
CGAAGCCA -0.0579128090567  
CGAAGCCC -0.256264342774  
CGAAGCCG -0.151454319381  
CGAAGCGA -0.0607641713343  
CGAAGCGC -0.173266734773  
CGAAGCTA -0.233262063777  
CGAAGCTC -0.228587419955  
CGAAGGAA -0.0108213096559  
CGAAGGAC -0.251629468694  
CGAAGGAG -0.183641993238  
CGAAGGCA -0.0840106463997  
CGAAGGCC -0.347220165117  
CGAAGGCG -0.0548695489918  
CGAAGGGA -0.138255081435  
CGAAGGGC -0.314154820161  
CGAAGGTA -0.0217189206777  
CGAAGGTC -0.270216140379  
CGAAGTAA 0.058031758023  
CGAAGTAC -0.0967790619821  
CGAAGTAG 0.0198249167353  
CGAAGTCA -0.062778546181  
CGAAGTCC -0.0572240059274  
CGAAGTCG -0.177724223487  
CGAAGTGA -0.0926111022329  
CGAAGTGC -0.0895371082784  
CGAAGTTA -0.117566559492  
CGAAGTTC 0.0150414937759  
CGAATAAA -0.0458042547257  
CGAATAAC 0.0065067290171  
CGAATAAG 0.0818322026828  
CGAATACA 0.204112604009  
CGAATACC 0.122277105458

CGAATACG 0.0804627983051  
CGAATAGA 0.120147313062  
CGAATAGC -0.00211026042095  
CGAATATA 0.103948863415  
CGAATATC 0.408285582559  
CGAATCAA 0.122399139947  
CGAATCAC 0.258307615108  
CGAATCAG 0.345268282509  
CGAATCCA 0.395763353751  
CGAATCCC 0.39828322721  
CGAATCCG 0.425810665437  
CGAATCGA 0.273171752679  
CGAATCGC 0.325786575126  
CGAATCTA 0.426993457595  
CGAATCTC 0.464631495752  
CGAATGAA 0.00404602443595  
CGAATGAC -0.00706547032502  
CGAATGAG 0.0978063568112  
CGAATGCA 0.0739341149092  
CGAATGCC -0.125228428903  
CGAATGCG -0.0833548788175  
CGAATGGA 0.0444191013032  
CGAATGGC -0.230733928966  
CGAATGTA 0.0308384059971  
CGAATGTC -0.118969033825  
CGAATTAA -0.00770246764964  
CGAATTAC 0.150873466331  
CGAATTAG 0.091977685122  
CGAATTCA 0.0305508902501  
CGAATTCC 0.160914619421  
CGAATTCCG 0.185690044487  
CGAATTGA -0.0210872691877  
CGAATTGC 0.12494785835  
CGAATTTA 0.179659465663  
CGAATTTTC 0.178442446596  
CGACAAAA 0.10659674197  
CGACAAAC -0.154469867757  
CGACAAAG -0.189232485251  
CGACAACA -0.0553924945731  
CGACAACC 0.101785988715  
CGACAACG -0.135825032244  
CGACAAGA -0.0834047410876  
CGACAAGC -0.214008636062  
CGACAATA 0.118196186901  
CGACAATC 0.279243430801  
CGACACAA 0.0513705020966  
CGACACAC -0.179388023034  
CGACACAG -0.130534979424  
CGACACCA -0.1367265962  
CGACACCC 0.0189401422363  
CGACACCG -0.24845137963  
CGACACGA 0.0114145854255  
CGACACGC -0.219325407315  
CGACACTA -0.103298096555

CGACACTC -0.0409957522474  
CGACAGAA 0.0191762026289  
CGACAGAC -0.22244961988  
CGACAGAG -0.118508479107  
CGACAGCA -0.0600484494361  
CGACAGCC -0.268231319038  
CGACAGCG -0.0562690728666  
CGACAGGA 0.104834890242  
CGACAGGC -0.305164941382  
CGACAGTA 0.138748855927  
CGACAGTC -0.225424358959  
CGACATAA 0.120230411206  
CGACATAC -0.0470361611008  
CGACATAG -0.0539348858832  
CGACATCA -0.0815030678214  
CGACATCC 0.0324650376518  
CGACATCG 0.00436321725529  
CGACATGA -0.0162291342815  
CGACATGC -0.281335056412  
CGACATTA 0.02292119431  
CGACATTC -0.19291375183  
CGACCAAA 0.0489386792453  
CGACCAAC -0.0271893229832  
CGACCAAG -0.240561831369  
CGACCACA -0.0593114134729  
CGACCACC -0.196194625999  
CGACCACG -0.200555857354  
CGACCAGA 0.0687097758343  
CGACCAGC -0.107960375071  
CGACCATA 0.12660541395  
CGACCATC -0.0608053963863  
CGACCCAA -0.0901585051247  
CGACCCAC -0.0186822215347  
CGACCCAG -0.236680961663  
CGACCCCA -0.345410508761  
CGACCCCC -0.365514113663  
CGACCCCG -0.320660313698  
CGACCCGA -0.0877559439422  
CGACCCGC -0.223717609884  
CGACCCTA -0.130794976162  
CGACCCTC -0.13394270741  
CGACCGAA -0.0304532033762  
CGACCGAC -0.193917211329  
CGACCGAG -0.291396486839  
CGACCGCA -0.299272535756  
CGACCGCC -0.243217070213  
CGACCGCG -0.197606461812  
CGACCGGA 0.0767233739631  
CGACCGGC -0.284928357013  
CGACCGTA -0.114199737427  
CGACCGTC -0.192029939857  
CGACCTAA -0.108320597823  
CGACCTAC -0.208601038677  
CGACCTAG 0.0390947358021

CGACCTCA -0.174968772694  
CGACCTCC -0.370026605228  
CGACCTCG -0.212683598615  
CGACCTGA 0.0485746968062  
CGACCTGC -0.170169372555  
CGACCTTA -0.12591019584  
CGACCTTC -0.116659258162  
CGACGAAA -0.0818000633355  
CGACGAAC -0.191394609901  
CGACGAAG -0.173128705336  
CGACGACA -0.178010413752  
CGACGACC -0.282942483337  
CGACGACG -0.00597619400405  
CGACGAGA -0.123177190527  
CGACGAGC -0.240453159041  
CGACGATA 0.184858613801  
CGACGATC 0.0755093415882  
CGACGCAA 0.147462073811  
CGACGCAC -0.201792504074  
CGACGCAG -0.184307140152  
CGACGCCA -0.346570119861  
CGACGCCC -0.172233632452  
CGACGCCG -0.172312478396  
CGACGCGA -0.131466688068  
CGACGCGC -0.273659807956  
CGACGCTA -0.116280090649  
CGACGCTC -0.0652209106425  
CGACGGAA 0.166026469862  
CGACGGAC -0.264755260192  
CGACGGAG -0.132084927615  
CGACGGCA -0.122475422409  
CGACGGCC -0.103802036211  
CGACGGCG -0.0404728973194  
CGACGGGA -0.200880668285  
CGACGGGC -0.254847257884  
CGACGGTA -0.107699816394  
CGACGGTC -0.193802405725  
CGACGTAA 0.229316230872  
CGACGTAC -0.043456546198  
CGACGTAG -0.0969125563209  
CGACGTCA -0.0852397859272  
CGACGTCC -0.155523602033  
CGACGTCT 0.181376003879  
CGACGTGA -0.0489342202026  
CGACGTGC -0.109064209416  
CGACGTTA 0.112656150519  
CGACGTTC 0.0302531339876  
CGACTAAA -0.00173745285924  
CGACTAAC -0.0810163464862  
CGACTAAG 0.0161794335183  
CGACTACA -0.043817645606  
CGACTACC -0.0608951078209  
CGACTACG -0.179777941104  
CGACTAGA -0.213714257494



CGACTAGC -0.235085120208  
CGACTATA -0.0701239996048  
CGACTATC -0.0378404448809  
CGACTCAA 0.0166263254956  
CGACTCAC -0.176787249866  
CGACTCAG 0.0155539090585  
CGACTCCA -0.164750328992  
CGACTCCC -0.0434785134915  
CGACTCCG -0.177835942516  
CGACTCGA -0.0446610748809  
CGACTCGC 0.0780143011585  
CGACTCTA -0.218894047149  
CGACTCTC -0.186614379085  
CGACTGAA -0.0707374140464  
CGACTGAC -0.307229720506  
CGACTGAG -0.0777843640914  
CGACTGCA -0.0400868715804  
CGACTGCC -0.153847553495  
CGACTGCG -0.0571978556797  
CGACTGGA -0.0232664564962  
CGACTGGC -0.30319065515  
CGACTGTA -0.00295384957282  
CGACTGTC -0.142174535757  
CGACTTAA 0.0587662531817  
CGACTTAC -0.130502658226  
CGACTTAG -0.026244679151  
CGACTTCA -0.214820301783  
CGACTTCC -0.311151710668  
CGACTTGA -0.11255186722  
CGACTTGC -0.125511760897  
CGACTTTA -0.12458768969  
CGACTTTC 0.070738380645  
CGAGAAAA 0.150985751608  
CGAGAAAC 0.0550201211628  
CGAGAAAG 0.042919820435  
CGAGAACA 0.211748725175  
CGAGAACC -0.262510288066  
CGAGAACG -0.094584267969  
CGAGAAGA 0.0542051051095  
CGAGAAGC -0.110356578427  
CGAGAATA 0.175103511397  
CGAGAATC 0.437147357791  
CGAGACAA -0.0187569915593  
CGAGACAC -0.0785866368146  
CGAGACAG -0.179451569228  
CGAGACCA -0.197425435781  
CGAGACCC -0.189784406363  
CGAGACCG -0.257958847737  
CGAGACGA -0.168024274256  
CGAGACGC -0.244668119099  
CGAGACTA -0.109564852317  
CGAGACTC -0.124979423868  
CGAGAGAA 0.041289325781  
CGAGAGAC -0.273551198257

CGAGAGAG -0.142556059413  
CGAGAGCA 0.0082968924789  
CGAGAGCC -0.222354582263  
CGAGAGCG -0.0520452637298  
CGAGAGGA 0.0259619184036  
CGAGAGGC -0.253853840188  
CGAGAGTA 0.0182029243233  
CGAGAGTC -0.20293856235  
CGAGATAA -0.0203338712156  
CGAGATAC 0.321312451876  
CGAGATAG -0.00305361698171  
CGAGATCA 0.283384377264  
CGAGATCC 0.405494632154  
CGAGATCG 0.320706821225  
CGAGATGA -0.0238405998695  
CGAGATGC 0.0250746448879  
CGAGATTA 0.367578051225  
CGAGATTC 0.444441700147  
CGAGCAAA 0.133684424622  
CGAGCAAC -0.190062883764  
CGAGCAAG -0.0509346153424  
CGAGCACA -0.149165116522  
CGAGCACC -0.133485329865  
CGAGCACG -0.313876021897  
CGAGCAGA -0.039524691358  
CGAGCAGC -0.0947015250545  
CGAGCATA 0.00742231197246  
CGAGCATC 0.03948832682  
CGAGCCAA -0.109801016703  
CGAGCCAC -0.280154537375  
CGAGCCAG -0.138192735734  
CGAGCCCA -0.194513831604  
CGAGCCCC -0.378310565933  
CGAGCCCG -0.190286078047  
CGAGCCGA -0.220278094939  
CGAGCCGC -0.191055894846  
CGAGCCTA -0.18310943185  
CGAGCCTC -0.257452791002  
CGAGCGAA -0.0713808392072  
CGAGCGAC -0.141899527355  
CGAGCGAG 0.0298469779798  
CGAGCGCA -0.157920116195  
CGAGCGCC -0.279625251246  
CGAGCGCG 0.180703747612  
CGAGCGGA -0.0192974300118  
CGAGCGGC -0.174040788109  
CGAGCGTA -0.00145173329821  
CGAGCGTC -0.205694444444  
CGAGCTAA -0.0284994566828  
CGAGCTAC -0.0157946151229  
CGAGCTAG -0.202288985007  
CGAGCTCA -0.283118550338  
CGAGCTCC -0.337420640222  
CGAGCTCG 0.0960019931676

CGAGCTGA -0.139787226625  
CGAGCTGC -0.350647640679  
CGAGCTTA -0.228910483913  
CGAGCTTC -0.245890021029  
CGAGGAAA 0.00137674717242  
CGAGGAAC -0.08174340571  
CGAGGAAG -0.048476828503  
CGAGGACA -0.142268463512  
CGAGGACC -0.213718519551  
CGAGGACG -0.269806787137  
CGAGGAGA -0.0205297904216  
CGAGGAGC -0.324804521848  
CGAGGATA 0.228856798338  
CGAGGATC 0.328036722246  
CGAGGCAA 0.0703747612461  
CGAGGCAC -0.321676564973  
CGAGGCAG -0.0199854756718  
CGAGGCCA -0.129419028664  
CGAGGCCC -0.308809006518  
CGAGGCCG -0.275552921941  
CGAGGCGA 0.0237562086661  
CGAGGCGC -0.143346339375  
CGAGGCTA 0.0536908169047  
CGAGGCTC -0.303059079082  
CGAGGGAA 0.167912193279  
CGAGGGAC -0.314052239174  
CGAGGGAG -0.326925450506  
CGAGGGCA -0.231178967121  
CGAGGGCC -0.204392618989  
CGAGGGCG -0.229863739481  
CGAGGGGA 0.0479936442073  
CGAGGGGC -0.345006650829  
CGAGGGTA -0.0562928915516  
CGAGGGTC -0.113574034908  
CGAGGTAA 0.0825142010373  
CGAGGTAC -0.270744526188  
CGAGGTAG -0.1392105783  
CGAGGTCA -0.0655707567102  
CGAGGTCC -0.186421696932  
CGAGGTGA -0.020572980983  
CGAGGTGC -0.370970130832  
CGAGGTTA -0.139986983631  
CGAGGTTC -0.356535415233  
CGAGTAAA 0.146290258842  
CGAGTAAC -0.022271294292  
CGAGTAAG -0.0628364197531  
CGAGTACA -0.0254311158892  
CGAGTACC -0.18974793236  
CGAGTACG -0.0785868058885  
CGAGTAGA 0.102063162748  
CGAGTAGC -0.312581949451  
CGAGTATA 0.0954576390261  
CGAGTATC 0.177593596095  
CGAGTCAA -0.0486783463962

CGAGTCAC -0.199401277623  
CGAGTCAG -0.142984550369  
CGAGTCCA -0.287699161821  
CGAGTCCC -0.230067424853  
CGAGTCCG -0.238364883402  
CGAGTCGA -0.0908676851486  
CGAGTCGC -0.20353824212  
CGAGTCTA -0.0509092563466  
CGAGTCTC -0.334791699943  
CGAGTGAA 0.0545512915494  
CGAGTGAC -0.173872314221  
CGAGTGAG 0.00695970809049  
CGAGTGCA -0.245172601116  
CGAGTGCC -0.158205761317  
CGAGTGCG -0.150998015879  
CGAGTGGA -0.10328979478  
CGAGTGGC -0.142431144022  
CGAGTGTA -0.115329856319  
CGAGTGTC -0.0444082197194  
CGAGTTAA -0.126422021369  
CGAGTTAC -0.0672241929814  
CGAGTTAG -0.162143865745  
CGAGTTCA -0.113996554319  
CGAGTTCC -0.183481135282  
CGAGTTGA -0.076383420743  
CGAGTTGC -0.121210874051  
CGAGTTTA -0.0490273560647  
CGAGTTTC -0.0077978366097  
CGATAAAA 0.16658143623  
CGATAAAC 0.0116194267285  
CGATAAAG -0.0216159470408  
CGATAACA 0.113598128804  
CGATAACC -0.187770972593  
CGATAACG 0.194244110738  
CGATAAGA 0.0157962024029  
CGATAAGC -0.0276158642341  
CGATAATA 0.011295527893  
CGATAATC 0.333948832682  
CGATACAA 0.0706167086018  
CGATACAC 0.199466508595  
CGATACAG -0.0299231473276  
CGATACCA 0.00389690223715  
CGATACCC 0.212768584836  
CGATACCG 0.187742797786  
CGATACGA 0.175803756919  
CGATACGC 0.271884758084  
CGATACTA 0.137014718957  
CGATACTC 0.273242485436  
CGATAGAA 0.125101539002  
CGATAGAC -0.131646227909  
CGATAGAG -0.19871371603  
CGATAGCA -0.11210531515  
CGATAGCC -0.0946582692537  
CGATAGCG -0.155603299254

CGATAGGA -0.1156250343  
CGATAGGC -0.0789693896823  
CGATAGTA 0.167569540495  
CGATAGTC -0.201102495294  
CGATATAA 0.286860953322  
CGATATAC 0.154360553804  
CGATATAG 0.077842373062  
CGATATCA 0.396028845204  
CGATATCC 0.472829892639  
CGATATCG 0.441057905109  
CGATATGA 0.0903395244682  
CGATATGC 0.262225844695  
CGATATTA 0.234990484215  
CGATATTC 0.395384640717  
CGATCAAA 0.165972359437  
CGATCAAC -0.108718320217  
CGATCAAG 0.0907660569785  
CGATCACA 0.114341149092  
CGATCACC 0.0575755814798  
CGATCACG 0.111912445937  
CGATCAGA 0.180380050267  
CGATCAGC -0.00249338952776  
CGATCATA 0.228147160201  
CGATCATC 0.0891594766076  
CGATCCAA 0.214697891999  
CGATCCAC 0.204861797185  
CGATCCAG 0.255343627557  
CGATCCCA 0.177779553412  
CGATCCCC 0.266388943775  
CGATCCCG 0.185040605524  
CGATCCGA 0.228556060506  
CGATCCGC 0.2507040166  
CGATCCTA 0.0821539087356  
CGATCCTC 0.326660574327  
CGATCGAA 0.286194537751  
CGATCGAC 0.1444046935  
CGATCGAG 0.106344266614  
CGATCGCA 0.324211288942  
CGATCGCC 0.326063689653  
CGATCGCG 0.399032024065  
CGATCGGA 0.190062740836  
CGATCGGC 0.043404801897  
CGATCGTA 0.225847248296  
CGATCGTC 0.166765461371  
CGATCTAA 0.18936992431  
CGATCTAC 0.192804323508  
CGATCTAG 0.297015302202  
CGATCTCA 0.272836354087  
CGATCTCC 0.379028573545  
CGATCTGA 0.273405198088  
CGATCTGC 0.235326311629  
CGATCTTA 0.224928450017  
CGATCTTC 0.338896024062  
CGATGAAA -0.134166214014

CGATGAAC -0.115877995643  
CGATGAAG -0.0390245360969  
CGATGACA 0.0783442007508  
CGATGACC -0.246712096522  
CGATGACG -0.156018314082  
CGATGAGA 0.113092557349  
CGATGAGC -0.0331725333948  
CGATGATA 0.185470631819  
CGATGATC 0.0803539625134  
CGATGCAA 0.000211310895958  
CGATGCAC -0.0972318253655  
CGATGCAG -0.0312742434588  
CGATGCCA -0.214443144899  
CGATGCCC -0.0976610056223  
CGATGCCG -0.311316507246  
CGATGCGA 0.164891106281  
CGATGCGC 0.174530678787  
CGATGCTA 0.0493644037017  
CGATGCTC -0.0761429676825  
CGATGGAA 0.0932764807578  
CGATGGAC -0.108615053826  
CGATGGAG -0.124339408307  
CGATGGCA -0.154988667731  
CGATGGCC -0.124866261748  
CGATGGCG -0.0824720946313  
CGATGGGA -0.115075998791  
CGATGGGC -0.144586782861  
CGATGGTA -0.208049489735  
CGATGGTC -0.194986201888  
CGATGTAA 0.144404926563  
CGATGTAC 0.0955196988173  
CGATGTAG 0.0100698903487  
CGATGTCA -0.123525844707  
CGATGTCC -0.114307091076  
CGATGTGA 0.0930002150025  
CGATGTGC -0.0437135080557  
CGATGTTA 0.15677347472  
CGATGTTC -0.0130417096451  
CGATTAAC 0.0775430949323  
CGATTAAC -0.0694663988232  
CGATTAAG -0.0985118338553  
CGATTACA 0.400107576456  
CGATTACC 0.419207356936  
CGATTACG 0.441295599494  
CGATTAGA -0.0195841188962  
CGATTAGC -0.0702210805945  
CGATTATA 0.184769523968  
CGATTATC 0.276694737882  
CGATTCAA 0.0274272514637  
CGATTCAC 0.163548007496  
CGATTCAG -0.0587114975082  
CGATTCCA 0.265403741026  
CGATTCCC 0.457562185778  
CGATTCCG 0.356205003939

CGATTCGA 0.200890561213  
CGATTCGC 0.381899670216  
CGATTCTA 0.262465425269  
CGATTCTC 0.426162910116  
CGATTGAA 0.1138392922  
CGATTGAC 0.0780203736635  
CGATTGAG -0.115316015673  
CGATTGCA 0.309917498271  
CGATTGCC 0.305357895196  
CGATTGCG 0.456549910653  
CGATTGGA -0.187844260581  
CGATTGGC 0.0111240248137  
CGATTGTA 0.0956771828141  
CGATTGTC 0.24255662255  
CGATTTAA 0.145702979209  
CGATTTAC 0.258483157167  
CGATTTAG 0.135686930115  
CGATTTCA 0.307018266043  
CGATTTCC 0.468323989924  
CGATTTGA 0.273887524879  
CGATTTGC 0.359355251115  
CGATTTTA 0.286860953322  
CGATTTTC 0.420097038354  
CGCAAAAA 0.248660782893  
CGCAAAAC 0.0332149850951  
CGCAAAAG 0.0282891811854  
CGCAAACA -0.0154096208092  
CGCAAACC -0.100606459757  
CGCAAACG -0.0439593006026  
CGCAAAGA 0.0500588897527  
CGCAAAGC -0.212278275697  
CGCAAATA 0.121391248985  
CGCAAATC 0.423115366176  
CGCAACAA 0.107490368468  
CGCAACAC 0.0446405125098  
CGCAACAG -0.10679142008  
CGCAACCA -0.0398050353755  
CGCAACCC 0.0890110847994  
CGCAACCG -0.0321399724564  
CGCAACGA -0.0125743704582  
CGCAACGC -0.0590908298516  
CGCAACTA -0.215220504716  
CGCAACTC -0.0127527970738  
CGCAAGAA 0.00276756788168  
CGCAAGAC 0.065565934944  
CGCAAGAG -0.066524890118  
CGCAAGCA -0.0200855123054  
CGCAAGCC -0.0278457327809  
CGCAAGCG -0.0564206886691  
CGCAAGGA -0.016518060773  
CGCAAGGC -0.162024232846  
CGCAAGTA -1.37214867505E-5  
CGCAAGTC -0.0187783811109  
CGCAATAA 0.245986861602

CGCAATAC 0.085133592395  
CGCAATAG 0.129870201147  
CGCAATCA 0.434847636611  
CGCAATCC 0.48350791045  
CGCAATGA 0.0694361716037  
CGCAATGC 0.0614504099575  
CGCAATTA 0.229619335599  
CGCAATTC 0.283098223236  
CGCACAAA 0.163162198951  
CGCACAAAC -0.0639444581653  
CGCACAAAG -0.120802054524  
CGCACACA -0.0229206921099  
CGCACACC -0.119197034274  
CGCACACG 0.0491493905539  
CGCACAGA 0.0151805562417  
CGCACAGC -0.113631741346  
CGCACATA -0.00143519397219  
CGCACATC 0.0881578080748  
CGCACCAA -0.0399091178504  
CGCACCCAC -0.204488086282  
CGCACCCAG -0.236491193412  
CGCACCCA -0.11626911617  
CGCACCCC -0.133644459809  
CGCACCCG -0.240844767692  
CGCACCGA -0.0677045599245  
CGCACCGC 0.00371303431469  
CGCACCTA -0.113775751818  
CGCACCTC -0.189845381637  
CGCACGAA 0.0761844387363  
CGCACGAC -0.156315177062  
CGCACGAG -0.0778353615139  
CGCACGCA 0.0367512675606  
CGCACGCC -0.254175438596  
CGCACGCG 0.0274359682129  
CGCACGGA -0.0135153196868  
CGCACGGC -0.0592664995483  
CGCACGTA -0.0303612008977  
CGCACGTC -0.123706053765  
CGCACTAA 0.0530603053768  
CGCACTAC -0.170565205863  
CGCACTAG 0.0318115392549  
CGCACTCA -0.133487961379  
CGCACTCC -0.262530030532  
CGCACTGA -0.0960761579935  
CGCACTGC -0.100315045336  
CGCACTTA -0.064266601588  
CGCACTTC -0.0568683617264  
CGCAGAAA -0.0895589139119  
CGCAGAAC -0.170118785822  
CGCAGAAAG -0.136007077301  
CGCAGACA -0.0619326725718  
CGCAGACC -0.102803363295  
CGCAGACG 0.0532578850261  
CGCAGAGA -0.0560995452762



CGCAGAGC -0.261202787371  
CGCAGATA 0.325869698702  
CGCAGATC 0.316365342818  
CGCAGCAA -0.0831666666667  
CGCAGCAC 0.0769180480293  
CGCAGCAG -0.177632419746  
CGCAGCCA -0.196599770611  
CGCAGCCC -0.284702919829  
CGCAGCCG -0.14662962963  
CGCAGCGA 0.0543462470437  
CGCAGCGC -0.138936418066  
CGCAGCTA -0.204128050219  
CGCAGCTC -0.330159435556  
CGCAGGAA -0.101697286975  
CGCAGGAC -0.336813643202  
CGCAGGAG -0.173051561365  
CGCAGGCA -0.0537518341493  
CGCAGGCC -0.231636384428  
CGCAGGCG -0.0962693842534  
CGCAGGGA -0.0237834001097  
CGCAGGGC -0.283366879562  
CGCAGGTA -0.111028467497  
CGCAGGTC -0.146530007409  
CGCAGTAA -0.0160780439615  
CGCAGTAC -0.121703703704  
CGCAGTAG -0.231572617194  
CGCAGTCA -0.296453786906  
CGCAGTCC -0.260015219241  
CGCAGTGA 0.0692056048972  
CGCAGTGC -0.028455369097  
CGCAGTTA 0.0462935519989  
CGCAGTTC 0.0354318354824  
CGCATAAA -0.0728887623409  
CGCATAAC 0.0619689784628  
CGCATAAG 0.0961849694187  
CGCATACA 0.0949413798614  
CGCATACC 0.0655388161686  
CGCATACG 0.0590490460822  
CGCATAGA -0.10601058091  
CGCATAGC -0.0571039764176  
CGCATATA 0.0665922203127  
CGCATATC 0.2816191172  
CGCATCAA 0.0913713802718  
CGCATCAC -0.00230601106391  
CGCATCAG 0.0355276734945  
CGCATCCA -0.0939343590876  
CGCATCCC -0.118347269758  
CGCATCCG 0.0148576990688  
CGCATCGA 0.0508636845699  
CGCATCGC 0.116145412189  
CGCATCTA -0.140869931574  
CGCATCTC -0.0672600925001  
CGCATGAA -0.0701921915989  
CGCATGAC -0.067410920108

CGCATGAG -0.0298330118298  
CGCATGCA 0.0585838188078  
CGCATGCC -0.14991055358  
CGCATGCG -0.0397450457568  
CGCATGGA -0.0985816186557  
CGCATGGC -0.236718792867  
CGCATGTA -0.0414862380286  
CGCATGTC -0.0996526586175  
CGCATTAA 0.0333633576918  
CGCATTAC -0.0800328330888  
CGCATTAG 0.00283730187555  
CGCATTCA -0.00658259846295  
CGCATTCC -0.0146790083643  
CGCATTGA -0.000353028343963  
CGCATTGC -0.114409745924  
CGCATTTA 0.0505554457837  
CGCATTTC 0.123552656429  
CGCCAAAA -0.0560101614974  
CGCCAAAC -0.146773458894  
CGCCAAAG -0.247853541588  
CGCCAACA -0.133018836857  
CGCCAACC -0.0140913818852  
CGCCAACG -0.138664590861  
CGCCAAGA 0.0569262773765  
CGCCAAGC -0.216529211319  
CGCCAATA 0.0892329252217  
CGCCAATC 0.0778362122819  
CGCCACAA 0.00356860614442  
CGCCACAC -0.0446538822483  
CGCCACAG -0.129242137305  
CGCCACCA -0.233125366959  
CGCCACCC -0.0835611344642  
CGCCACCG -0.158561523469  
CGCCACGA -0.0140281551  
CGCCACGC -0.206272392584  
CGCCACTA -0.266510071209  
CGCCACTC -0.00790201501383  
CGCCAGAA -0.00271368055273  
CGCCAGAC -0.243523602033  
CGCCAGAG -0.09864177409  
CGCCAGCA -0.158400140473  
CGCCAGCC -0.17350102337  
CGCCAGCG 0.029668598652  
CGCCAGGA -0.095519986692  
CGCCAGGC -0.273687646762  
CGCCAGTA -0.102371307183  
CGCCAGTC -0.299576426953  
CGCCATAA -0.0966212211025  
CGCCATAC -0.205095679012  
CGCCATAG -0.181557761644  
CGCCATCA -0.0870469106388  
CGCCATCC -0.0150564720603  
CGCCATGA -0.154534150303  
CGCCATGC -0.291033763954

CGCCATTA -0.0758092992247  
CGCCATTC -0.0762076566367  
CGCCCAAA 0.00128572051196  
CGCCCAAC -0.13998988907  
CGCCCAAG -0.10393858075  
CGCCCACA -0.128438248077  
CGCCCACC -0.238328099992  
CGCCCACG -0.0624375734027  
CGCCCAGA -0.080339869281  
CGCCCAGC -0.207163461957  
CGCCCATA -0.196729766804  
CGCCCATC -0.12757211301  
CGCCCCAA -0.0248180378597  
CGCCCCAC -0.202021595838  
CGCCCCAG -0.109812927986  
CGCCCCCA 0.011531433651  
CGCCCCCC -0.131228087502  
CGCCCCCG -0.257180118739  
CGCCCCGA -0.195740804759  
CGCCCCGC -0.251239506173  
CGCCCCTA -0.197827558261  
CGCCCCTC -0.269300541364  
CGCCCGAA 0.0180608241445  
CGCCCGAC -0.333610706911  
CGCCCGAG -0.0728283476839  
CGCCCGCA -0.168301864015  
CGCCCGCC -0.113745246209  
CGCCCGCG -0.122458722241  
CGCCCGGA 0.0300460584807  
CGCCCGGC -0.323990859162  
CGCCCGTA 0.0482255373334  
CGCCCGTC -0.31726547254  
CGCCCTAA 0.000680484900369  
CGCCCTAC -0.144203542737  
CGCCCTAG -0.033415460425  
CGCCCTCA -0.0277695448857  
CGCCCTCC -0.0367544162921  
CGCCCTGA -0.205725490196  
CGCCCTGC -0.11855487417  
CGCCCTTA 0.0258409794818  
CGCCCTTC -0.301819667994  
CGCCGAAA 0.0335270807263  
CGCCGAAC -0.213245541838  
CGCCGAAG -0.177223022753  
CGCCGACA -0.189953946508  
CGCCGACC -0.266178503793  
CGCCGACG -0.153420181893  
CGCCGAGA -0.0973918828236  
CGCCGAGC -0.0927318040939  
CGCCGATA 0.210896507058  
CGCCGATC -0.0628542310132  
CGCCGCAA -0.0369208732589  
CGCCGCAC -0.109292091242  
CGCCGCAG -0.185570206485

CGCCGCCA -0.153743394736  
CGCCGCCC -0.131713807609  
CGCCGCCG -0.0335920728111  
CGCCGCGA 0.0457501811236  
CGCCGCGC -0.0254081940671  
CGCCGCTA 0.0471868207864  
CGCCGCTC -0.225179990342  
CGCCGGAA 0.0539290747171  
CGCCGGAC -0.117926935678  
CGCCGGAG -0.220913709483  
CGCCGGCA -0.155721897336  
CGCCGGCC -0.155767932698  
CGCCGGCG -0.00221751387068  
CGCCGGGA -0.0677180217404  
CGCCGGGC -0.361451936097  
CGCCGGTA 0.0511376732853  
CGCCGGTC -0.0561620452699  
CGCCGTAA 0.0484084668691  
CGCCGTAC -0.125246239869  
CGCCGTAG -0.136871459695  
CGCCGTCA -0.0997820812692  
CGCCGTCC -0.218957959589  
CGCCGTGA -0.0639039414234  
CGCCGTGC -0.3420858493  
CGCCGTTA -0.042723831272  
CGCCGTTC -0.160149781774  
CGCCTAAA -0.157454970529  
CGCCTAAC -0.0512120296558  
CGCCTAAG -0.0378778524153  
CGCCTACA 0.0310269696867  
CGCCTACC -0.150038688859  
CGCCTACG -0.133081444165  
CGCCTAGA -0.0626877640318  
CGCCTAGC -0.119837937645  
CGCCTATA -0.0278251098928  
CGCCTATC 0.0692124417067  
CGCCTCAA -0.0588320847397  
CGCCTCAC -0.0509143781488  
CGCCTCAG -0.139347096009  
CGCCTCCA -0.115747360102  
CGCCTCCC -0.224329010029  
CGCCTCCG -0.313560863791  
CGCCTCGA -0.0692104758529  
CGCCTCGC -0.250474913398  
CGCCTCTA -0.199249894371  
CGCCTCTC -0.244616178076  
CGCCTGAA -0.090509270691  
CGCCTGAC -0.155448005663  
CGCCTGAG 0.0020056850608  
CGCCTGCA -0.214645899839  
CGCCTGCC -0.152636165577  
CGCCTGGA -0.0278367714284  
CGCCTGGC -0.232459528691  
CGCCTGTA 0.0459532491683

CGCCTGTC -0.410122652273  
CGCCTTAA 0.0229410311914  
CGCCTTAC -0.139771049758  
CGCCTTAG -0.17951503778  
CGCCTTCA -0.103609361564  
CGCCTTCC -0.208596681809  
CGCCTTGA -0.0281180538405  
CGCCTTGC -0.250942340296  
CGCCTTTA -0.266776949286  
CGCCTTTC -0.138071633167  
CGCGAAAA 0.188184446414  
CGCGAAAC -0.117404974731  
CGCGAAAG -0.131768727821  
CGCGAACA -0.0896939861921  
CGCGAACC -0.0408203896681  
CGCGAACG -0.132499108147  
CGCGAAGA 0.113232452963  
CGCGAAGC -0.119996568184  
CGCGAATA 0.235379832348  
CGCGAATC 0.421531823399  
CGCGACAA -0.0255027552745  
CGCGACAC 0.000912551087262  
CGCGACAG 0.0868158466706  
CGCGACCA -0.0194717649964  
CGCGACCC -0.185732294992  
CGCGACCG -0.0755677390321  
CGCGACGA -0.0465661255447  
CGCGACGC -0.171214233842  
CGCGACTA -0.0838094454049  
CGCGACTC -0.246486564996  
CGCGAGAA 0.0549847417067  
CGCGAGAC -0.15216448791  
CGCGAGAG -0.280957475995  
CGCGAGCA -0.0110688187352  
CGCGAGCC -0.0822245334325  
CGCGAGCG 2.7442973501E-5  
CGCGAGGA -0.144446090616  
CGCGAGGC -0.207987688459  
CGCGAGTA 0.186894882434  
CGCGAGTC -0.129687726943  
CGCGATAA 0.198445629981  
CGCGATAC 0.139890750076  
CGCGATAG 0.00364717117829  
CGCGATCA 0.318947307251  
CGCGATCC 0.443379657073  
CGCGATGA 0.00783597050398  
CGCGATGC 0.128188561608  
CGCGATTA 0.285365759951  
CGCGATTC 0.37438873796  
CGCGCAAA 0.0968901622429  
CGCGCAAC -0.0491648726463  
CGCGCAAG 0.186636918483  
CGCGCACA 0.0463721052372  
CGCGCACC -0.0432007288854

CGCGCACG -0.0308706008913  
CGCGCAGA 0.0546612816527  
CGCGCAGC -0.194824360726  
CGCGCATA 0.190286833959  
CGCGCATC -0.108977242296  
CGCGCCAA -0.0555465173031  
CGCGCCAC -0.0173422459306  
CGCGCCAG 0.0044503709557  
CGCGCCCA -0.204508555014  
CGCGCCCC -0.188649838917  
CGCGCCCG -0.178798953035  
CGCGCCGA -0.13945819363  
CGCGCCGC -0.156008230453  
CGCGCCTA 0.0873976377088  
CGCGCCTC -0.0829674719974  
CGCGCGAA 0.00404234999671  
CGCGCGAC 0.000315594195262  
CGCGCGAG 0.0166048302597  
CGCGCGCA 0.153911172583  
CGCGCGCC -0.156211410225  
CGCGCGCG 0.179009480545  
CGCGCGGA -0.0249154756416  
CGCGCGGC -0.161745859686  
CGCGCGTA 0.0822805544217  
CGCGCGTC -0.150670667183  
CGCGCTAA 0.0677451222524  
CGCGCTAC -0.112198714243  
CGCGCTAG 0.106366220993  
CGCGCTCA -0.118868090197  
CGCGCTCC -0.0963820501023  
CGCGCTGA -0.000702540121627  
CGCGCTGC -0.0846614420407  
CGCGCTTA 0.0499691901294  
CGCGCTTC -0.0875786972071  
CGCGGAAA 0.201999777734  
CGCGGAAC -0.0691047936631  
CGCGGAAG -0.218205761317  
CGCGGACA -0.166047930283  
CGCGGACC -0.224348752981  
CGCGGACG -0.103894322061  
CGCGGAGA -0.019957931313  
CGCGGAGC -0.0754452402514  
CGCGGATA 0.337758052097  
CGCGGATC 0.292815619405  
CGCGGCAA 0.0304374355324  
CGCGGCAC -0.237450063655  
CGCGGCAG -0.0371481860227  
CGCGGCCA -0.14252432825  
CGCGGCCC -0.276332032986  
CGCGGCCG -0.11395796233  
CGCGGCGA 0.0730681504511  
CGCGGCGC -0.108609533218  
CGCGGCTA -0.0669526224505  
CGCGGCTC -0.304203151403

CGCGGGAA -0.0635653681934  
CGCGGGAC -0.17435719411  
CGCGGGAG -0.130410945372  
CGCGGGCA -0.191643404683  
CGCGGGCC -0.203571115061  
CGCGGGGA -0.0159839529345  
CGCGGGGC -0.169698241802  
CGCGGGTA -0.00639077315875  
CGCGGGTC -0.236480397966  
CGCGGTAA 0.0555445789084  
CGCGGTAC -0.157999143948  
CGCGGTAG -0.151831914882  
CGCGGTCA -0.164693534845  
CGCGGTCC -0.14546106852  
CGCGGTGA 0.207449669587  
CGCGGTGC -0.130118042179  
CGCGGTTA 0.164242610181  
CGCGGTTC -0.0254311158892  
CGCGTAAA 0.0474815858672  
CGCGTAAC 0.022888730696  
CGCGTAAG -0.0642479850777  
CGCGTACA 0.0111006827812  
CGCGTACC -0.0935424836601  
CGCGTACG -0.0720785365904  
CGCGTAGA 0.0970304940944  
CGCGTAGC -0.0451635213912  
CGCGTATA 0.0992896829833  
CGCGTATC 0.356931994828  
CGCGTCAA -0.138351221156  
CGCGTCAC -0.0187151834472  
CGCGTCAG -0.0336187980324  
CGCGTCCA -0.0835648148148  
CGCGTCCC -0.221807956104  
CGCGTCCG -0.2748080396  
CGCGTCGA -0.0347281074364  
CGCGTCGC -0.128713878123  
CGCGTCTA -0.228217623461  
CGCGTCTC -0.203782472343  
CGCGTGAA 0.0436607441198  
CGCGTGAC -0.120968140282  
CGCGTGAG -0.0031209868616  
CGCGTGCA 0.126758719494  
CGCGTGCC -0.106773448346  
CGCGTGGA 0.108347740183  
CGCGTGGC -0.21371539961  
CGCGTGTA -0.0292377441678  
CGCGTGTC -0.169254155623  
CGCGTTAA 0.0196234175816  
CGCGTTAC -0.180991812634  
CGCGTTAG -0.272240731758  
CGCGTTCA 0.074070576613  
CGCGTTCC -0.0451542138219  
CGCGTTGA 0.135824029246  
CGCGTTGC -0.285453288564

CGCGTTTA -0.00668785264221  
CGCGTTTC -0.0833388211148  
CGCTAAAA -0.0902462183583  
CGCTAAAC -0.102913394577  
CGCTAAAG 0.0165481130211  
CGCTAACA 0.0250794946661  
CGCTAACC -0.0551130998213  
CGCTAACG -0.0712848182537  
CGCTAAGA 0.117311463978  
CGCTAAGC -0.220994816095  
CGCTAATA 0.149630671551  
CGCTAATC 0.0486546725279  
CGCTACAA -0.0589106925987  
CGCTACAC -0.127283151998  
CGCTACAG 0.0142847342279  
CGCTACCA 0.0266071075768  
CGCTACCC -0.310874786887  
CGCTACCG -0.207789464443  
CGCTACGA -0.0359585281784  
CGCTACGC -0.0893904927792  
CGCTACTA -0.112644139001  
CGCTACTC -0.024620931496  
CGCTAGAA 0.00350849156655  
CGCTAGAC -0.145315139701  
CGCTAGAG 0.00830973237612  
CGCTAGCA -0.0610971481702  
CGCTAGCC -0.206631808279  
CGCTAGCG 0.0502518269801  
CGCTAGGA 0.00643781811421  
CGCTAGGC -0.21462962963  
CGCTAGTA -0.0850990270163  
CGCTAGTC -0.326410146693  
CGCTATAA 0.0386475376803  
CGCTATAC -0.126491083676  
CGCTATAG -0.252261891045  
CGCTATCA 0.0819968605238  
CGCTATCC 0.176277959633  
CGCTATGA -0.140175744372  
CGCTATGC -0.241258375665  
CGCTATTA -0.0773063773508  
CGCTATTC 0.0579342833152  
CGCTCAAA 0.0263833891898  
CGCTCAAC 0.00616824819427  
CGCTCAAG -0.171424573188  
CGCTCACA -0.126510220633  
CGCTCACC -0.0490254184353  
CGCTCACG -0.167118902085  
CGCTCAGA 0.050769500977  
CGCTCAGC -0.100844486147  
CGCTCATA 0.185952518999  
CGCTCATC -0.133535822468  
CGCTCCAA -0.141410649017  
CGCTCCAC -0.267854290287  
CGCTCCAG 0.0277132867901



CGCTCCCA -0.00127990934581  
CGCTCCCC -0.102411038489  
CGCTCCCG -0.188983808756  
CGCTCCGA -0.0475163527811  
CGCTCCGC -0.0952130895252  
CGCTCCTA -0.0838798250839  
CGCTCCTC -0.174747998529  
CGCTCGAA 0.0759484291642  
CGCTCGAC -0.261719827924  
CGCTCGAG -0.0364955491894  
CGCTCGCA -0.14549946911  
CGCTCGCC -0.204333333333  
CGCTCGGA -0.196690450182  
CGCTCGGC -0.0881307137898  
CGCTCGTA -0.106562806887  
CGCTCGTC -0.233982635571  
CGCTCTAA -0.0596261174495  
CGCTCTAC -0.0697645024915  
CGCTCTAG -0.240172839506  
CGCTCTCA -0.317498910675  
CGCTCTCC -0.238207410161  
CGCTCTGA -0.0829631612737  
CGCTCTGC -0.157998715859  
CGCTCTTA -0.123691527285  
CGCTCTTC -0.0233876333168  
CGCTGAAA 0.0934296032844  
CGCTGAAC 0.000463440500923  
CGCTGAAG -0.0751085208783  
CGCTGACA -0.219337690632  
CGCTGACC -0.217248920279  
CGCTGACG -0.238832593488  
CGCTGAGA -0.114081512315  
CGCTGAGC -0.161657957341  
CGCTGATA 0.141572811697  
CGCTGATC -0.0847808786806  
CGCTGCAA 0.0321110513852  
CGCTGCAC -0.269706826201  
CGCTGCAG -0.179300411523  
CGCTGCCA -0.251707892321  
CGCTGCCC -0.184552977776  
CGCTGCCG -0.234065602147  
CGCTGCGA -0.0681509824259  
CGCTGCGC -0.196359733088  
CGCTGCTA -0.0137609348081  
CGCTGCTC -0.092869725556  
CGCTGGAA -0.180849779709  
CGCTGGAC -0.18288453159  
CGCTGGAG 0.0342960498598  
CGCTGGCA -0.211591402894  
CGCTGGCC -0.231104055864  
CGCTGGGA -0.0253928845329  
CGCTGGGC -0.294618612688  
CGCTGGTA -0.042649125118  
CGCTGGTC -0.209511543442

CGCTGTAA 0.0402184352789  
CGCTGTAC -0.00326151700492  
CGCTGTAG -0.12712092278  
CGCTGTCA -0.155906190155  
CGCTGTCC -0.25147356587  
CGCTGTGA -0.00433948832682  
CGCTGTGC -0.0346176010538  
CGCTGTGA -0.122001075552  
CGCTGTTC -0.17979956427  
CGCTTAAA 0.0927418534714  
CGCTTAAC 0.0169430314105  
CGCTTAAG -0.269165555501  
CGCTTACA 0.130254124271  
CGCTTACC -0.136871459695  
CGCTTACG 0.152421019122  
CGCTTAGA -0.187060798936  
CGCTTAGC -0.0690370977254  
CGCTTATA 0.105243803377  
CGCTTATC 0.0282525412193  
CGCTTCAA 0.0765635668938  
CGCTTCAC -0.1289218107  
CGCTTCAG -0.105375694331  
CGCTTCCA -0.148999369613  
CGCTTCCC -0.0675149938817  
CGCTTCCG -0.0891503094675  
CGCTTCGA -0.000586506642959  
CGCTTCGC -0.175934614055  
CGCTTCTA -0.168697346396  
CGCTTCTC -0.218027596224  
CGCTTGAA -0.12066581053  
CGCTTGAC -0.114395223907  
CGCTTGAG -0.103198121076  
CGCTTGCA -0.0815030581262  
CGCTTGCC -0.224576131687  
CGCTTGGA -0.161801988674  
CGCTTGGC -0.297924285511  
CGCTTGTA 0.000439044200775  
CGCTTGTC -0.177416666667  
CGCTTTAA 0.14652077982  
CGCTTTAC -0.144161274921  
CGCTTTAG -0.180211248285  
CGCTTTCA -0.111942510001  
CGCTTTCC -0.0192824981845  
CGCTTTGA 0.120042712071  
CGCTTTGC -0.317443712981  
CGCTTTTA 0.0658768323333  
CGCTTTTC -0.0280796504863  
CGGAAAAA -0.0310419582339  
CGGAAAAC 0.0232083448346  
CGGAAAAG -0.0192102625194  
CGGAAACA -0.0807425355681  
CGGAAACC -0.189513916326  
CGGAAACG -0.118185938013  
CGGAAAGA 0.0467628268458

CGGAAAGC -0.232637749189  
CGGAAATA 0.118122790841  
CGGAAATC 0.47428593383  
CGGAACAA -0.12775412956  
CGGAACAC -0.029237743968  
CGGAACAG -0.0412674699985  
CGGAACCA -0.153987766036  
CGGAACCC -0.235915628207  
CGGAACCG -0.117591860925  
CGGAACGA 0.0604788250016  
CGGAACGC -0.225113854595  
CGGAACTA -0.0763717387248  
CGGAACTC -0.132924453226  
CGGAAGAA -0.0103045045935  
CGGAAGAC -0.0572952682011  
CGGAAGAG -0.0938638658413  
CGGAAGCA -0.00164003962824  
CGGAAGCC -0.380909508071  
CGGAAGGA -0.068276861273  
CGGAAGGC -0.346712085308  
CGGAAGTA -0.0121098721026  
CGGAAGTC -0.407189671544  
CGGAATAA 0.110983104034  
CGGAATAC 0.00119514149597  
CGGAATAG 0.123849179833  
CGGAATCA 0.318954978761  
CGGAATCC 0.456544099487  
CGGAATGA -0.130263468388  
CGGAATGC 0.0811805384045  
CGGAATTA 0.0950240400448  
CGGAATTC 0.170626687743  
CGGACAAA -0.0246175526274  
CGGACAAC -0.0119099616261  
CGGACAAG -0.336124756335  
CGGACACA -0.10030513572  
CGGACACC -0.198527500858  
CGGACACG -0.281177472717  
CGGACAGA 0.164617262069  
CGGACAGC -0.244438696999  
CGGACATA -0.0523368151904  
CGGACATC -0.149525785418  
CGGACCAA -0.0808434907675  
CGGACCAC -0.277303947174  
CGGACCAG -0.30906961178  
CGGACCCA -0.153156136529  
CGGACCCC -0.107416666667  
CGGACCCG -0.269276786544  
CGGACCGA -0.0635477741428  
CGGACCGC -0.243662118644  
CGGACCTA -0.214742193174  
CGGACCTC -0.312738304888  
CGGACGAA -0.131661514863  
CGGACGAC -0.0590216031087  
CGGACGAG -0.304967165358

CGGACGCA -0.330813376007  
CGGACGCC -0.222521423384  
CGGACGGA -0.140939058719  
CGGACGGC -0.0987519464522  
CGGACGTA -0.0604077621439  
CGGACGTC -0.183944093244  
CGGACTAA -0.0543636796811  
CGGACTAC -0.161498143699  
CGGACTAG -0.153988399976  
CGGACTCA -0.0465493183839  
CGGACTCC -0.276248108486  
CGGACTGA -0.252012873093  
CGGACTGC -0.237598691971  
CGGACTTA -0.0263302324305  
CGGACTTC -0.164797366861  
CGGAGAAA 0.0953670772136  
CGGAGAAC -0.206811909949  
CGGAGAAG -0.089353132271  
CGGAGACA 0.053826648225  
CGGAGACC -0.134959384722  
CGGAGACG -0.245874967762  
CGGAGAGA 0.0108235087488  
CGGAGAGC -0.228277348265  
CGGAGATA 0.224849999274  
CGGAGATC 0.379495706118  
CGGAGCAA 0.0444740828558  
CGGAGCAC -0.255147857504  
CGGAGCAG -0.246326185835  
CGGAGCCA -0.108070579841  
CGGAGCCC -0.264313802938  
CGGAGCCG -0.0687762740514  
CGGAGCGA -0.0714808564283  
CGGAGCGC -0.103800664087  
CGGAGCTA -0.129277533398  
CGGAGCTC -0.310986014408  
CGGAGGAA -0.151305392086  
CGGAGGAC -0.304441385559  
CGGAGGAG -0.180930041152  
CGGAGGCA -0.239537707242  
CGGAGGCC -0.208969614437  
CGGAGGGA -0.158225308642  
CGGAGGGC -0.189431840923  
CGGAGGTA -0.233142377401  
CGGAGGTC -0.290976680384  
CGGAGTAA -0.15679414783  
CGGAGTAC -0.0810144020725  
CGGAGTAG 0.0328560620045  
CGGAGTCA -0.0554751756978  
CGGAGTCC -0.11696397469  
CGGAGTGA -0.19289051061  
CGGAGTGC -0.217056241427  
CGGAGTTA -0.056201240684  
CGGAGTTC -0.22412090083  
CGGATAAA -0.122374208994

CGGATAAC 0.0206601484753  
CGGATAAG -0.0133054441171  
CGGATACA 0.105369517528  
CGGATACC 0.351849107555  
CGGATACG 0.341012305144  
CGGATAGA 0.10291720541  
CGGATAGC 0.101220344893  
CGGATATA 0.246034605494  
CGGATATC 0.476736591363  
CGGATCAA -0.143865426306  
CGGATCAC 0.187435509012  
CGGATCAG 0.0174669126727  
CGGATCCA 0.120213945421  
CGGATCCC 0.346277221681  
CGGATCCG 0.355347210688  
CGGATCGA 0.0335541590725  
CGGATCGC 0.364972337483  
CGGATCTA 0.225007684033  
CGGATCTC 0.369776946937  
CGGATGAA -0.106015706031  
CGGATGAC -0.114600554966  
CGGATGAG -0.1468438847  
CGGATGCA -0.0290743778876  
CGGATGCC -0.0836127397714  
CGGATGGA -0.00508493180758  
CGGATGGC -0.182496968899  
CGGATGTA -0.115949068357  
CGGATGTC 0.122611585031  
CGGATTAA 0.0782961755472  
CGGATTAC 0.466164485058  
CGGATTAG 0.124567773167  
CGGATTCA 0.13776921557  
CGGATTCC 0.442073371534  
CGGATTGA 0.116506617465  
CGGATTGC 0.452362965438  
CGGATTTA 0.144545527512  
CGGATTTTC 0.486325166304  
CGGCAAAA 0.0291589789781  
CGGCAAAC -0.0339415687243  
CGGCAAAG -0.224640122689  
CGGCAACA -0.0883515002208  
CGGCAACC -0.170663321678  
CGGCAACG -0.032215652376  
CGGCAAGA 0.0974939076599  
CGGCAAGC -0.237966066253  
CGGCAATA 0.0290660173978  
CGGCAATC 0.357842652967  
CGGCACAA -0.245905147579  
CGGCACAC -0.105584642234  
CGGCACAG -0.188178326475  
CGGCACCA -0.244220565076  
CGGCACCC -0.263297161646  
CGGCACCG -0.328796282581  
CGGCACGA -0.239574932657

CGGCACGC -0.169386723527  
CGGCACTA -0.173147093685  
CGGCACTC -0.0876107171596  
CGGCAGAA 0.052198582436  
CGGCAGAC -0.18506215267  
CGGCAGAG -0.206320599966  
CGGCAGCA -0.242972912174  
CGGCAGCC -0.179807949251  
CGGCAGGA -0.107450980392  
CGGCAGGC -0.207581699346  
CGGCAGTA -0.106066356131  
CGGCAGTC -0.129108772256  
CGGCATAA 0.082092891491  
CGGCATAC -0.0791059520869  
CGGCATAG -0.0226249930999  
CGGCATCA -0.142628996674  
CGGCATCC 0.079458385475  
CGGCATGA 0.0804163700551  
CGGCATGC -0.144859890019  
CGGCATTA 0.0737044731451  
CGGCATTC -0.273684701441  
CGGCCAAA 0.204035763683  
CGGCCAAC -0.309183626057  
CGGCCAAG -0.158487532376  
CGGCCACA -0.392577438736  
CGGCCACC -0.176142338417  
CGGCCACG -0.320294190251  
CGGCCAGA -0.050824386924  
CGGCCAGC -0.189421124829  
CGGCCATA -0.320940107638  
CGGCCATC -0.272230726603  
CGGCCCAA -0.25243482447  
CGGCCCAC -0.199556180363  
CGGCCCAG -0.221126335083  
CGGCCCCA -0.21238025874  
CGGCCCCC -0.130975898854  
CGGCCCCG -0.210712190475  
CGGCCCGA -0.203820102009  
CGGCCCGC -0.198621945734  
CGGCCCTA -0.176092812975  
CGGCCCTC -0.210350477607  
CGGCCGAA -0.104948636902  
CGGCCGAC 0.132157127489  
CGGCCGAG 0.049584554425  
CGGCCGCA -0.206434654726  
CGGCCGCC -0.211366791215  
CGGCCGGA 0.0825258233696  
CGGCCGGC -0.196051136881  
CGGCCGTA 0.0230034033857  
CGGCCGTC -0.12472706856  
CGGCCTAA -0.196096528052  
CGGCCTAC -0.197383975068  
CGGCCTAG -0.0218416633742  
CGGCCTCA -0.190315500686

CGGCCTCC -0.27000899774  
CGGCCTGA -0.22110008176  
CGGCCTGC -0.144289170905  
CGGCCTTA -0.245388525781  
CGGCCTTC -0.323319384783  
CGGCGAAA 0.0924685195623  
CGGCGAAC -0.0973669624581  
CGGCGAAG -0.162142437761  
CGGCGACA -0.153857552109  
CGGCGACC -0.331418286774  
CGGCGACG -0.213071895425  
CGGCGAGA 0.0656188939384  
CGGCGAGC -0.156772685368  
CGGCGATA 0.155994094272  
CGGCGATC 0.286438780215  
CGGCGCAA -0.0944642488793  
CGGCGCAC 0.0824008832973  
CGGCGCAG -0.103344992679  
CGGCGCCA -0.130537220815  
CGGCGCCC -0.271083676269  
CGGCGCCG -0.13149656841  
CGGCGCGA 0.0298185463368  
CGGCGCGC -0.215993772272  
CGGCGCTA -0.0954137302685  
CGGCGCTC -0.219462711018  
CGGCGGAA -0.244298311859  
CGGCGGAC -0.232183620955  
CGGCGGAG -0.0950867892637  
CGGCGGCA -0.205327551  
CGGCGGCC -0.340571958351  
CGGCGGGA 0.0563029360917  
CGGCGGGC -0.303498447426  
CGGCGGTA -0.0650277891569  
CGGCGGTC -0.317476269591  
CGGCGTAA -0.0576793269785  
CGGCGTAC -0.00732640730457  
CGGCGTAG -0.167355281207  
CGGCGTCA -0.213902745537  
CGGCGTCC -0.26140644378  
CGGCGTGA -0.0151126037139  
CGGCGTGC -0.117284432002  
CGGCGTTA 0.101496465345  
CGGCGTTC -0.175416069929  
CGGCTAAA -0.00751663044194  
CGGCTAAC -0.165306408893  
CGGCTAAG -0.0906255144033  
CGGCTACA -0.0552482094344  
CGGCTACC -0.399917231766  
CGGCTACG -0.224254357809  
CGGCTAGA -0.0733798420195  
CGGCTAGC -0.0116268155321  
CGGCTATA -0.0109003490746  
CGGCTATC -0.0856769632703  
CGGCTCAA -0.377222948439

CGGCTCAC -0.380253241756  
CGGCTCAG -0.105916052711  
CGGCTCCA -0.307540172375  
CGGCTCCC -0.360724394418  
CGGCTCGA -0.0377827495533  
CGGCTCGC -0.217214233842  
CGGCTCTA -0.223408581288  
CGGCTCTC -0.307759400971  
CGGCTGAA -0.170879099453  
CGGCTGAC -0.174721536351  
CGGCTGAG -0.12715031195  
CGGCTGCA -0.224855100715  
CGGCTGCC -0.306516909405  
CGGCTGGA 0.0605973878808  
CGGCTGGC -0.212158383318  
CGGCTGTA -0.172116476571  
CGGCTGTC -0.293477124183  
CGGCTTAA -0.164595497458  
CGGCTTAC -0.173283950617  
CGGCTTAG -0.0880871532851  
CGGCTTCA -0.273973128809  
CGGCTTCC -0.214045428532  
CGGCTTGA -0.100325344953  
CGGCTTGC -0.212678111918  
CGGCTTTA -0.0488498296044  
CGGCTTTC -0.177782303856  
CGGGAAAA 0.0525634506705  
CGGGAAAC -0.103786307054  
CGGGAAAG -0.111229075107  
CGGGAAACA -0.209339655258  
CGGGAAACC -0.141881841634  
CGGGAAACG -0.124203988193  
CGGGAAAGA 0.0281372807306  
CGGGAAAGC -0.111459694989  
CGGGAAATA 0.0723012579859  
CGGGAAATC 0.470773233221  
CGGGACAA -0.111468946743  
CGGGACAC -0.182643427741  
CGGGACAG -0.103410312273  
CGGGACCA 0.0213026828829  
CGGGACCC -0.0917329250827  
CGGGACCG -0.228487803864  
CGGGACGA -0.0659362068776  
CGGGACGC -0.435011571889  
CGGGACTA -0.278491083676  
CGGGACTC -0.132787379973  
CGGGAGAA -0.0302310986629  
CGGGAGAC -0.196888888889  
CGGGAGAG -0.168505446623  
CGGGAGCA -0.391177487241  
CGGGAGCC -0.256808332656  
CGGGAGGA -0.141193610142  
CGGGAGGC -0.179401734284  
CGGGAGTA 0.0182804759345



CGGGAGTC -0.102692047333  
CGGGATAA 0.0757703427135  
CGGGATAC 0.213143405053  
CGGGATAG -0.018931326544  
CGGGATCA 0.120513073833  
CGGGATCC 0.348575160816  
CGGGATGA -0.106641431821  
CGGGATGC 0.0555329565761  
CGGGATTA 0.134490935138  
CGGGATTC 0.431908885983  
CGGGCAAA -0.0942995455444  
CGGGCAAC -0.0935224971601  
CGGGCAAG -0.141558562711  
CGGGCACA -0.166579520697  
CGGGCACC -0.205745851219  
CGGGCACG -0.132972434369  
CGGGCAGA -0.041203196672  
CGGGCAGC -0.133624142661  
CGGGCATA 0.0231101775426  
CGGGCATC -0.0394582784959  
CGGGCCAA -0.195593242365  
CGGGCCAC -0.223684282713  
CGGGCCAG -0.246321714229  
CGGGCCCA -0.336617501851  
CGGGCCCC -0.271474184894  
CGGGCCCG -0.154320572036  
CGGGCCGA -0.294858241509  
CGGGCCGC -0.164371669916  
CGGGCCTA -0.165733743819  
CGGGCCTC -0.199671136728  
CGGGCGAA 0.104427308808  
CGGGCGAC -0.211228538035  
CGGGCGAG -0.124250470635  
CGGGCGCA -0.0962684377351  
CGGGCGCC -0.319300762667  
CGGGCGGA -0.0675737969411  
CGGGCGGC -0.267796201579  
CGGGCGTA -0.149089324619  
CGGGCGTC -0.217851260795  
CGGGCTAA -0.160543209877  
CGGGCTAC -0.231844760026  
CGGGCTAG 0.0657780631847  
CGGGCTCA -0.277463880926  
CGGGCTCC -0.304442949541  
CGGGCTGA -0.0713976016026  
CGGGCTGC -0.236207927225  
CGGGCTTA -0.28005716292  
CGGGCTTC -0.347048368078  
CGGGGAAA 0.234413587869  
CGGGGAAC -0.201664979257  
CGGGGAAG -0.111226337449  
CGGGGACA -0.073605966316  
CGGGGACC -0.166787397859  
CGGGGACG -0.0843311546841

CGGGGAGA -0.103474219317  
CGGGGAGC -0.281297655599  
CGGGGATA 0.12086955448  
CGGGGATC 0.336999694914  
CGGGGCAA -0.26326704575  
CGGGGCAC -0.17219919423  
CGGGGCAG -0.113353091298  
CGGGGCCA -0.0578882083031  
CGGGGCCC -0.17276513094  
CGGGGCGA -0.153493418702  
CGGGGCGC -0.106334584609  
CGGGGCTA 0.0701480394578  
CGGGGCTC -0.32857682199  
CGGGGGAA -0.0461964890668  
CGGGGGAC -0.192731376713  
CGGGGGAG -0.173489729917  
CGGGGGCA -0.210924950692  
CGGGGGCC -0.0847314869214  
CGGGGGGA 0.0371320442535  
CGGGGGGC -0.238969680599  
CGGGGGTA -0.305319501159  
CGGGGGTC -0.324020188644  
CGGGGTAA -0.0638743866194  
CGGGGTAC -0.114997855221  
CGGGGTAG -0.0662638038157  
CGGGGTCA -0.220489436519  
CGGGGTCC -0.140920842411  
CGGGGTGA -0.0435208508256  
CGGGGTGC -0.132252703512  
CGGGGTTA -0.27821998472  
CGGGGTTC -0.125519992975  
CGGGTAAA -0.184432552099  
CGGGTAAC -0.0744038626909  
CGGGTAAG -0.0396537334543  
CGGGTACA -0.177793689201  
CGGGTACC 0.0551274451689  
CGGGTACG 0.0409953278196  
CGGGTAGA 0.0694013046068  
CGGGTAGC -0.180902179628  
CGGGTATA 0.0492764587818  
CGGGTATC 0.234542414922  
CGGGTCAA -0.313117010987  
CGGGTCAC -0.158043205429  
CGGGTCAG -0.316675282733  
CGGGTCCA -0.319236868244  
CGGGTCCC -0.359206877024  
CGGGTCGA -0.161280409169  
CGGGTCGC -0.207246281391  
CGGGTCTA -0.141832712146  
CGGGTCTC -0.239415077618  
CGGGTGAA -0.0568201298796  
CGGGTGAC -0.238242701891  
CGGGTGAG -0.0468009186092  
CGGGTGCA -0.232381846017

CGGGTGCC -0.0844181121508  
CGGGTGGA 0.0608218621704  
CGGGTGGC -0.0861261533456  
CGGGTGTA -0.123335196475  
CGGGTGTC -0.158260538647  
CGGGTTAA -0.0762696442266  
CGGGTTAC -0.120780165199  
CGGGTTAG -0.228551825941  
CGGGTTCA -0.170133936741  
CGGGTTCC -0.251297022513  
CGGGTTGA -0.117208337449  
CGGGTTGC 0.150532821298  
CGGGTTTA -0.201341823707  
CGGGTTTC 0.0705723506553  
CGGTAAAA 0.0124777036854  
CGGTAAAC 0.0181718394117  
CGGTAAAG -0.0637221810598  
CGGTAAAC -0.0264041847357  
CGGTAAAC -0.143917276521  
CGGTAAAC -0.25468218099  
CGGTAAAG -0.00676469296801  
CGGTAAAC -0.13913027057  
CGGTAAAT 0.079405227144  
CGGTAAAT 0.402264902009  
CGGTACAA -0.255326534347  
CGGTACAC -0.0710620890822  
CGGTACAG -0.131025286448  
CGGTACCA -0.0764098089892  
CGGTACCC -0.141937039533  
CGGTACCG -0.18977878728  
CGGTACGA -0.0768597834423  
CGGTACGC -0.138161865569  
CGGTACTA -0.0650088269629  
CGGTACTC -0.273807025773  
CGGTAGAA -0.0102160301018  
CGGTAGAC -0.191798745865  
CGGTAGAG -0.149441892626  
CGGTAGCA -0.0796004543659  
CGGTAGCC -0.0893802711794  
CGGTAGGA 0.0403795912095  
CGGTAGGC -0.102298169367  
CGGTAGTA -0.194350663312  
CGGTAGTC 0.031765286999  
CGGTATAA 0.138323563635  
CGGTATAC -0.113158934681  
CGGTATAG 0.0178864465849  
CGGTATCA 0.201643107231  
CGGTATCC 0.290466880039  
CGGTATGA -0.0938805191954  
CGGTATGC -0.213591647052  
CGGTATTA 0.00056368311711  
CGGTATTC 0.0698615776417  
CGGTCAAA 0.00177050510093  
CGGTCAAC -0.155354722593

CGGTCAAG -0.104621489018  
CGGTCACA -0.0251235477151  
CGGTCACC -0.178047229903  
CGGTCACG -0.123212962963  
CGGTCAGA 0.102631232299  
CGGTCAGC -0.303230313011  
CGGTCATA 0.0457013080545  
CGGTCATC -0.0658713692946  
CGGTCCAA -0.321377225161  
CGGTCCAC -0.168063076673  
CGGTCCAG -0.0366080542659  
CGGTCCCA -0.215327003974  
CGGTCCCC -0.375275181663  
CGGTCCGA -0.101817553218  
CGGTCCGC -0.102517729569  
CGGTCCTA -0.0324705262465  
CGGTCCTC -0.184991590829  
CGGT CGAA -0.0818568500593  
CGGT CGAC -0.222189302037  
CGGT CGAG -0.286788788492  
CGGT CGCA -0.112889064489  
CGGT CGCC -0.293006590815  
CGGT CGGA -0.189737109659  
CGGT CGGC -0.325134041464  
CGGT CGTA 0.077577615388  
CGGT CGTC -0.28418460551  
CGGTCTAA -0.0128378230038  
CGGTCTAC 0.000499735605  
CGGTCTAG -0.229317222798  
CGGTCTCA -0.213737044536  
CGGTCTCC -0.182031134265  
CGGTCTGA -0.106391385953  
CGGTCTGC 0.0073024691358  
CGGTCTTA -0.00906969277882  
CGGTCTTC -0.35843784976  
CGGTGAAA 0.0950751006846  
CGGTGAAC -0.131122730574  
CGGTGAAG -0.173300083946  
CGGTGACA -0.0859401102269  
CGGTGACC -0.267441725382  
CGGTGACG -0.0419465849964  
CGGTGAGA 0.0920009297866  
CGGTGAGC -0.199703703704  
CGGTGATA 0.143871398893  
CGGTGATC 0.214982639141  
CGGTGCAA -0.182719571432  
CGGTGCAC -0.252870919708  
CGGTGCAG -0.108424444005  
CGGTGCCA -0.290823855999  
CGGTGCCC -0.122107538918  
CGGTGCGA -0.0891475120273  
CGGTGCGC -0.158804688069  
CGGTGCTA -0.145358250322  
CGGTGCTC -0.270857780205

CGGTGGAA 0.0949239463629  
CGGTGGAC -0.119938207581  
CGGTGGAG -0.236399255303  
CGGTGGCA -0.154975525703  
CGGTGGCC -0.290741852409  
CGGTGGGA 0.0599532006322  
CGGTGGGC -0.154998213419  
CGGTGGTA 0.0872494456519  
CGGTGGTC -0.278501914574  
CGGTGTAA -0.015471465678  
CGGTGTAC -0.140111292208  
CGGTGTAG -0.0867369616752  
CGGTGTCA -0.275750443051  
CGGTGTCC -0.195041122798  
CGGTGTGA 0.07330155437  
CGGTGTGC -0.276514733473  
CGGTGTTA -0.0999574654922  
CGGTGTTC -0.0889904228753  
CGGTTAAA 0.116108552584  
CGGTTAAC 0.07863509627  
CGGTTAAG -0.102098682223  
CGGTTACA -0.157100137174  
CGGTTACC -0.119772492845  
CGGTTACG 0.216317420725  
CGGTTAGA 0.0458983731805  
CGGTTAGC -0.208028836658  
CGGTTATA -0.1690938301  
CGGTTATC -0.0307425217556  
CGGTTCAA -0.0157143339998  
CGGTTCAC 0.0423405389245  
CGGTTCAG -0.150159122085  
CGGTTCCA -0.107066216624  
CGGTTCCC -0.175112362325  
CGGTTCGA -0.116483896463  
CGGTTCGC -0.106214154139  
CGGTTCTA -0.114272890746  
CGGTTCTC -0.0808202461029  
CGGTTGAA -0.0937962962963  
CGGTTGAC -0.213932928335  
CGGTTGAG 0.0322409364813  
CGGTTGCA 0.0132092445212  
CGGTTGCC -0.233577342048  
CGGTTGGA -0.104687985729  
CGGTTGGC -0.130627441942  
CGGTTGTA 0.041175437441  
CGGTTGTC -0.0803357941191  
CGGTTTAA -0.156962732839  
CGGTTTAC 0.0139849392961  
CGGTTTAG 0.012608800641  
CGGTTTCA 0.0177830468287  
CGGTTTCC -0.1541902687  
CGGTTTGA 0.0466393334651  
CGGTTTGC -0.0642328840129  
CGGTTTTA -0.00176514171981

CGGTTTTTC -0.0100426518528  
CGTAAAAA 0.125771147555  
CGTAAAAC -0.0761230482149  
CGTAAAAG -0.00972009581193  
CGTAAACA -0.0210611100134  
CGTAAACC 0.0387933873411  
CGTAAACG -0.136032316917  
CGTAAAGA 0.0678778845958  
CGTAAAGC -0.0130271817297  
CGTAAATA 0.117259163483  
CGTAAATC 0.178956314558  
CGTAAACA -0.00219516801534  
CGTAAACAC -0.0746586094096  
CGTAAACAG 0.0958116533843  
CGTAAACCA -0.151541434145  
CGTAAACCC -0.0529786603438  
CGTAAACGA 0.153169264742  
CGTAAACGC -0.0644510026672  
CGTAAACTA 0.00215427341983  
CGTAAACTC -0.00841311580201  
CGTAAGAA 0.1172562579  
CGTAAGAC -0.0607484782009  
CGTAAGAG -0.054001714294  
CGTAAGCA -0.205378408523  
CGTAAGCC -0.121203928521  
CGTAAGGA -0.0475280751965  
CGTAAGGC -0.208848074314  
CGTAAGTA -0.00879272870974  
CGTAAGTC 0.0216278074162  
CGTAATAA 0.266416386748  
CGTAATAC 0.113290624179  
CGTAATAG 0.190334577891  
CGTAATCA 0.421584447518  
CGTAATCC 0.482450237084  
CGTAATGA 0.108704362335  
CGTAATGC 0.12929756965  
CGTAATTA 0.259303410926  
CGTAATTC 0.266944634114  
CGTACAAA 0.0288837296099  
CGTACAAC -0.0517944238189  
CGTACAAG -0.14562665404  
CGTACACA 0.090115206369  
CGTACACC -0.0446084089893  
CGTACACG 0.0455553360118  
CGTACAGA 0.0648340248963  
CGTACAGC -0.0762684887901  
CGTACATA 0.0562745614613  
CGTACATC 0.1091544271  
CGTACCAA 0.0138668952392  
CGTACCAC -0.170994375625  
CGTACCAG -0.0929034132171  
CGTACCCA -0.0273865733006  
CGTACCCC -0.106602575835  
CGTACCGA -0.0966407307762

CGTACCGC -0.262873899971  
CGTACCTA -0.0324884732379  
CGTACCTC -0.108556675008  
CGTACGAA -0.0150323942637  
CGTACGAC -0.0303743724276  
CGTACGAG -0.103299640019  
CGTACGCA 0.115491305207  
CGTACGCC -0.0539289094105  
CGTACGGA 0.0290224165734  
CGTACGGC 0.0535357527059  
CGTACGTA -0.119439996673  
CGTACGTC -0.130983638094  
CGTACTAA 0.0470921425278  
CGTACTAC 0.114630667786  
CGTACTAG -0.14488399403  
CGTACTCA -0.0128661036203  
CGTACTCC -0.222520161759  
CGTACTGA -0.0542584452785  
CGTACTGC 0.0747070607283  
CGTACTTA 0.160796420322  
CGTACTTC -0.13101902159  
CGTAGAAA 0.193968285333  
CGTAGAAC -0.244814386701  
CGTAGAAG 0.00383101128819  
CGTAGACA -0.165165832565  
CGTAGACC -0.297639423763  
CGTAGACG -0.256273057371  
CGTAGAGA 0.118043670914  
CGTAGAGC -0.00450591366867  
CGTAGATA 0.212508026277  
CGTAGATC 0.246487299392  
CGTAGCAA 0.0551465140267  
CGTAGCAC -0.105632301637  
CGTAGCAG -0.180254736359  
CGTAGCCA -0.252776736713  
CGTAGCCC -0.142239014004  
CGTAGCGA -0.112892573206  
CGTAGCGC -0.141515123942  
CGTAGCTA 0.00730318306626  
CGTAGCTC -0.0204542945302  
CGTAGGAA -0.0357938703374  
CGTAGGAC -0.104092172645  
CGTAGGAG -0.210194193403  
CGTAGGCA 0.0664811936135  
CGTAGGCC -0.0479467465688  
CGTAGGGA -0.165037037037  
CGTAGGGC -0.303254549573  
CGTAGGTA 0.00896227100373  
CGTAGGTC -0.197041796277  
CGTAGTAA -0.0385793321478  
CGTAGTAC -0.197815314203  
CGTAGTAG 0.00396137118353  
CGTAGTCA -0.148106562703  
CGTAGTCC -0.186870095497

CGTAGTGA 0.249986278513  
CGTAGTGC -0.0543892291818  
CGTAGTTA -0.379043260648  
CGTAGTTC -0.0631749637824  
CGTATAAA -0.0976145792177  
CGTATAAC 0.106238286868  
CGTATAAG 0.0948222509552  
CGTATACA 0.0130817112934  
CGTATACC -0.128429920116  
CGTATACG 0.199431228985  
CGTATAGA 0.00467218037684  
CGTATAGC 0.0455031943621  
CGTATATA 0.0753831039101  
CGTATATC 0.179952929554  
CGTATCAA 0.226012096863  
CGTATCAC 0.24468704033  
CGTATCAG 0.323659685174  
CGTATCCA 0.350603196558  
CGTATCCC 0.327737711036  
CGTATCGA 0.341130267253  
CGTATCGC 0.230152688391  
CGTATCTA 0.391877428703  
CGTATCTC 0.361299086194  
CGTATGAA -0.0363328635974  
CGTATGAC 0.0883993062416  
CGTATGAG -0.0234416761568  
CGTATGCA -0.0750765658961  
CGTATGCC -0.0386079351474  
CGTATGGA 0.00232301367077  
CGTATGGC -0.246294741578  
CGTATGTA 0.00571382912266  
CGTATGTC -0.0988402021652  
CGTATTAA -0.0839081475858  
CGTATTAC 0.136970639083  
CGTATTAG 0.0311173419726  
CGTATTCA 0.15379977627  
CGTATTCC 0.220401551581  
CGTATTGA 0.177291415455  
CGTATTGC 0.161583833336  
CGTATTTA 0.141005041187  
CGTATTTT 0.0714003457644  
CGTCAAAA -0.0807679456075  
CGTCAAAC 0.0393038266482  
CGTCAAAG 0.0231211652233  
CGTCAACA -0.0725102785001  
CGTCAACC 0.0161378405673  
CGTCAACG -0.0789034831595  
CGTCAAGA 0.0349376495642  
CGTCAAGC -0.0438830444016  
CGTCAATA 0.0690497290544  
CGTCAATC -0.0315100221739  
CGTCACAA 0.110326442259  
CGTCACAC -0.0305292142046  
CGTCACAG -0.0889558431295



CGTCACCA -0.196168940871  
CGTCACCC -0.298698167792  
CGTCACGA -0.110167374106  
CGTCACGC -0.0661293332455  
CGTCACTA -0.0251085961675  
CGTCACTC -0.126906775353  
CGTCAGAA -0.0934493911126  
CGTCAGAC -0.29337320397  
CGTCAGAG -0.171248155592  
CGTCAGCA -0.181622243076  
CGTCAGCC -0.288981660302  
CGTCAGGA 0.101258117473  
CGTCAGGC -0.0165555281139  
CGTCAGTA -0.0737734686881  
CGTCAGTC -0.252271380604  
CGTCATAA 0.0544026847588  
CGTCATAC 0.0583300401765  
CGTCATAG -0.174153265408  
CGTCATCA -0.230868221904  
CGTCATCC -0.0169059457561  
CGTCATGA -0.229967843189  
CGTCATGC -0.229484583601  
CGTCATTA 0.00554073634986  
CGTCATTC -0.166578849151  
CGTCCAAA -0.0730907337253  
CGTCCAAC -0.291138967067  
CGTCCAAG -0.259390946502  
CGTCCACA -0.238690544774  
CGTCCACC -0.180045555042  
CGTCCACG -0.164320387644  
CGTCCAGA -0.101174211248  
CGTCCAGC -0.0537038625605  
CGTCCATA 0.00371928437901  
CGTCCATC -0.176506900849  
CGTCCCAA -0.151739024334  
CGTCCCAC -0.0387585637831  
CGTCCCAG -0.40183010408  
CGTCCCCA -0.0778295514956  
CGTCCCCC -0.149191180909  
CGTCCCCG -0.116964408749  
CGTCCCCG -0.271055291562  
CGTCCCTA -0.272725820366  
CGTCCCTC -0.217506477211  
CGTCCGAA -0.190064544975  
CGTCCGAC -0.244393425716  
CGTCCGAG -0.19601920439  
CGTCCGCA -0.0527648808544  
CGTCCGCC -0.245729238669  
CGTCCGGA -0.0786041698625  
CGTCCGGC -0.181269653117  
CGTCCGTA 0.0342401282915  
CGTCCGTC -0.18971307225  
CGTCCTAA -0.0296987859229  
CGTCCTAC -0.00707073642003

CGTCCTAG -0.00786241190805  
CGTCCTCA -0.228110611723  
CGTCCTCC -0.371902685208  
CGTCCTGA -0.202849673203  
CGTCCTGC -0.227547606046  
CGTCCTTA -0.0427687301149  
CGTCCTTC -0.199528120713  
CGTCGAAA 0.180214432031  
CGTCGAAC -0.208708508092  
CGTCGAAG -0.00745171636414  
CGTCGACA -0.101007606441  
CGTCGACC -0.202256827136  
CGTCGACG -0.209536119489  
CGTCGAGA -0.102442216515  
CGTCGAGC -0.236868237979  
CGTCGATA 0.166458100068  
CGTCGATC 0.0470655073609  
CGTCGCAA -0.02550423973  
CGTCGCAC -0.0926355299549  
CGTCGCAG -0.172872734456  
CGTCGCCA -0.0465263030822  
CGTCGCCC -0.271265496123  
CGTCGCGA -0.0435903769204  
CGTCGCGC -0.152641975309  
CGTCGCTA 0.0622419479029  
CGTCGCTC -0.173878323866  
CGTCGGAA 0.0427658245318  
CGTCGGAC -0.249551418177  
CGTCGGAG -0.122548051224  
CGTCGGCA -0.302402323893  
CGTCGGCC -0.158933227275  
CGTCGGGA 0.163736870396  
CGTCGGGC -0.274704512615  
CGTCGGTA -0.0950170378784  
CGTCGGTC -0.216441415488  
CGTCGTAA 0.17397323958  
CGTCGTAC -0.0326562231916  
CGTCGTAG -0.0989016895966  
CGTCGTCA -0.0834626572358  
CGTCGTCC -0.046812769258  
CGTCGTGA -0.135560797483  
CGTCGTGC -0.210756476804  
CGTCGTTA -0.115037424821  
CGTCGTTC -0.0998535730784  
CGTCTAAA -0.0473857016257  
CGTCTAAC -0.0845214696492  
CGTCTAAG -0.174439423124  
CGTCTACA 0.0274233848218  
CGTCTACC -0.00811303925927  
CGTCTAGA -0.0263148720571  
CGTCTAGC -0.0807202106615  
CGTCTATA -0.113033373714  
CGTCTATC -0.13146455915  
CGTCTCAA -0.11894414539

CGTCTCAC -0.14665216242  
CGTCTCAG -0.184788891116  
CGTCTCCA -0.219040094805  
CGTCTCCC -0.20118174801  
CGTCTCGA -0.297514403292  
CGTCTCGC -0.0754185805304  
CGTCTCTA -0.188685820916  
CGTCTCTC -0.314900584795  
CGTCTGAA -0.0388810599567  
CGTCTGAC -0.0866259985476  
CGTCTGAG -0.345372591616  
CGTCTGCA -0.116705627991  
CGTCTGCC -0.338259980599  
CGTCTGGA -0.217178259809  
CGTCTGGC -0.0437049338206  
CGTCTGTA 0.171109787457  
CGTCTGTC -0.138192297859  
CGTCTTAA -0.0723901959612  
CGTCTTAC -0.0817882939252  
CGTCTTAG -0.264508855093  
CGTCTTCA -0.0655615772061  
CGTCTTCC -0.180557734205  
CGTCTTGA -0.0447677226723  
CGTCTTGC 0.151293690658  
CGTCTTTA -0.00169323146502  
CGTCTTTC -0.135764822106  
CGTGAAAA 0.0740274210191  
CGTGAAAC 0.0170969724912  
CGTGAAAG -0.0411323079069  
CGTGAACA -0.0884553113252  
CGTGAACC -0.139203208792  
CGTGAACG -0.0549572987332  
CGTGAAGA -0.0473688759384  
CGTGAAGC -0.232385105565  
CGTGAATA 0.0651232264824  
CGTGAATC 0.222804468787  
CGTGACAA -0.0518277923233  
CGTGACAC -0.338843904633  
CGTGACAG -0.177625329355  
CGTGACCA -0.0807189219657  
CGTGACCC -0.143817153547  
CGTGACGA -0.065871565674  
CGTGACGC -0.127235223932  
CGTGACTA -0.227542626342  
CGTGACTC -0.26784635229  
CGTGAGAA 0.0937067815865  
CGTGAGAC -0.121359843819  
CGTGAGAG -0.13665971056  
CGTGAGCA -0.0970304940944  
CGTGAGCC -0.230906206794  
CGTGAGGA -0.089115555349  
CGTGAGGC -0.297554183813  
CGTGAGTA -0.0518331000796  
CGTGAGTC -0.236226090437

CGTGATAA 0.0491813934381  
CGTGATAC 0.102000043909  
CGTGATAG 0.119354980351  
CGTGATCA 0.148372276836  
CGTGATCC 0.217713887234  
CGTGATGA -0.0727756041128  
CGTGATGC -0.133411812484  
CGTGATTA 0.153979922421  
CGTGATTC 0.356090419109  
CGTGCAA 0.136064097163  
CGTGCAAC -0.196375470482  
CGTGCAAG -0.0733057150162  
CGTGCACA -0.0931137681054  
CGTGCACC -0.161063180828  
CGTGCACG 0.13982025579  
CGTGCAGA -0.0342115508655  
CGTGCAGC -0.213313733237  
CGTGCATA 0.180252204611  
CGTGCATC -0.111927418535  
CGTGCCAA -0.132246752605  
CGTGCCAC -0.205705631554  
CGTGCCAG -0.144322440087  
CGTGCCCA -0.254772343926  
CGTGCCCC -0.133031260803  
CGTGCCGA -0.25670885937  
CGTGCCGC -0.258225447109  
CGTGCCTA -0.163370449666  
CGTGCCTC -0.255465582602  
CGTGCGAA -0.12011526074  
CGTGCGAC -0.0721653078894  
CGTGCGAG -0.0919366413034  
CGTGCGCA -0.00294188675931  
CGTGCGCC -0.0635786920422  
CGTGCGGA 0.105284967837  
CGTGCGGC -0.204137120755  
CGTGCGTA 0.076439792097  
CGTGCGTC -0.0312160426751  
CGTGCTAA -0.261803921569  
CGTGCTAC -0.0750700971918  
CGTGCTAG 0.0600161183398  
CGTGCTCA -0.14856336977  
CGTGCTCC -0.306272457134  
CGTGCTGA 0.0171170281085  
CGTGCTGC -0.106864972602  
CGTGCTTA 0.240188572342  
CGTGCTTC 0.0917363718194  
CGTGGA 0.139547520253  
CGTGGAAC -0.323204477336  
CGTGGAAG -0.200743391831  
CGTGGAACA -0.119807359842  
CGTGGAACC -0.195725308642  
CGTGGAAGA 0.0539215686275  
CGTGGAAGC -0.315887517147  
CGTGGAATA 0.271109135217

CGTGGATC 0.221499569702  
CGTGGCAA -0.0166427971752  
CGTGGCAC -0.0952784274984  
CGTGGCAG -0.211974157039  
CGTGGCCA -0.233296027475  
CGTGGCCC -0.290276474687  
CGTGGCGA 0.0210623561949  
CGTGGCGC -0.226773662551  
CGTGGCTA -0.0231534478851  
CGTGGCTC -0.339809740121  
CGTGGGAA 0.0254719886572  
CGTGGGAC -0.225952992297  
CGTGGGAG -0.229733140211  
CGTGGGCA -0.236829263333  
CGTGGGCC -0.17420823889  
CGTGGGGA 0.0680607008589  
CGTGGGGC -0.205472827555  
CGTGGGTA -0.0820097017215  
CGTGGGTC -0.339549147726  
CGTGGTAA 0.0711807270572  
CGTGGTAC 0.0101052267562  
CGTGGTAG -0.209052055215  
CGTGGTCA -0.238892483765  
CGTGGTCC -0.237436834395  
CGTGGTGA -0.037933418947  
CGTGGTGC -0.293394549763  
CGTGGTTA 0.0548036552235  
CGTGGTTC -0.199883805374  
CGTGTAAC 0.12657385453  
CGTGTAAC 0.0477178423237  
CGTGTAAG 0.080637194369  
CGTGTAACA -0.166246438895  
CGTGTAACC -0.201033653287  
CGTGTAGA -0.0414420015339  
CGTGTAGC -0.187024052494  
CGTGATATA -0.130137324639  
CGTGATATC 0.186457167007  
CGTGATCAA -0.151080246914  
CGTGATCAC -0.138067879008  
CGTGATCAG -0.266746227709  
CGTGATCCA -0.0260761553325  
CGTGATCCC -0.22851458522  
CGTGATCGA -0.0529516032554  
CGTGATCGC -0.0678728810304  
CGTGATCTA 0.0569166598063  
CGTGATCTC -0.0534002585969  
CGTGATGAA 0.0169764833722  
CGTGATGAC -0.266381824308  
CGTGATGAG -0.278835262751  
CGTGATGCA 0.112683593493  
CGTGATGCC -0.268827479639  
CGTGATGGA -0.150042562587  
CGTGATGGC -0.235183732752  
CGTGATGTA -0.0894642343528

CGTGTGTC -0.280379763381  
CGTGTTAA 0.127963841138  
CGTGTTAC 0.0344747432191  
CGTGTTAG -0.284700960219  
CGTGTTCA -0.249193899782  
CGTGTTCC -0.00588409594664  
CGTGTTGA -0.00974085908839  
CGTGTTGC 0.0243095608211  
CGTGTTTA 0.0435954200913  
CGTGTTTC -0.132933763639  
CGTTAAAA 0.105198088126  
CGTTAAAC -0.0981909591868  
CGTTAAAG 0.0239405517702  
CGTTAACA -0.0700125139959  
CGTTAACC -0.0480995519812  
CGTTAACG 0.110358186577  
CGTTAAGA 0.0951157148461  
CGTTAAGC 0.0267376890821  
CGTTAATA 0.101640073112  
CGTTAATC -0.0444801185478  
CGTTACAA 0.173284228984  
CGTTACAC -0.0113413833379  
CGTTACAG 0.0179449026968  
CGTTACCA 0.111404413581  
CGTTACCC 0.0607339502855  
CGTTACGA 0.177262359624  
CGTTACGC -0.075244734931  
CGTTACTA -0.0262819896156  
CGTTACTC -0.241381864876  
CGTTAGAA -0.159273894789  
CGTTAGAC -0.0547256093132  
CGTTAGAG -0.186351976713  
CGTTAGCA -0.213389267204  
CGTTAGCC -0.130644054773  
CGTTAGGA 0.0881800880392  
CGTTAGGC -0.112948670654  
CGTTAGTA -0.0262217611803  
CGTTAGTC 0.020450503853  
CGTTATAA 0.0777349667391  
CGTTATAC 0.070742368863  
CGTTATAG 0.0329665615404  
CGTTATCA 0.228450016707  
CGTTATCC 0.170780003777  
CGTTATGA 0.0482258974512  
CGTTATGC -0.000470704458617  
CGTTATTA 0.0821829645664  
CGTTATTC -0.0869946101434  
CGTTCAAA 0.151937297517  
CGTTCAAC -0.139830803914  
CGTTCAAG -0.101843028796  
CGTTCACA -0.29804563835  
CGTTCACC 0.0207551208589  
CGTTCAGA -0.0598578658965  
CGTTCAGC -0.149386496334

CGTTCATA 0.00527976729508  
CGTTCATC -0.107014684578  
CGTTCCAA 0.0720105182107  
CGTTCCAC -0.360923173161  
CGTTCCAG 0.0890779132102  
CGTTCCCA -0.132213662129  
CGTTCCCC -0.22137037037  
CGTTCCGA 0.0233251553272  
CGTTCCGC -0.101162746034  
CGTTCCTA -0.272806829841  
CGTTCCTC -0.0372794020809  
CGTTCGAA -0.0115738513898  
CGTTCGAC -0.158422404292  
CGTTCGAG -0.0941119590759  
CGTTCGCA -0.0263728250227  
CGTTCGCC -0.339185091378  
CGTTCGGA 0.0012760982678  
CGTTCGGC -0.140330661048  
CGTTCGTA 0.0232112504177  
CGTTCGTC -0.331090777052  
CGTTCTAA -0.0364422339461  
CGTTCTAC -0.168420012841  
CGTTCTAG -0.010196801563  
CGTTCTCA -0.143842978448  
CGTTCTCC -0.242649479784  
CGTTCTGA -0.0733459564776  
CGTTCTGC -0.0697746069467  
CGTTCTTA 0.104478144416  
CGTTCTTC -0.341263157895  
CGTTGAAA -0.0576249763921  
CGTTGAAC -0.125656757354  
CGTTGAAG -0.138410706208  
CGTTGACA -0.236434311886  
CGTTGACC -0.221893614146  
CGTTGAGA 0.174383630815  
CGTTGAGC -0.0263303754191  
CGTTGATA 0.0999709441692  
CGTTGATC 0.0792177672854  
CGTTGCAA -0.0552344727656  
CGTTGCAC -0.209626354986  
CGTTGCAG -0.0218583283936  
CGTTGCCA -0.142979989309  
CGTTGCCC -0.275272218204  
CGTTGCGA 0.0287841587611  
CGTTGCGC -0.0984004765156  
CGTTGCTA -0.0514331788532  
CGTTGCTC -0.199349309808  
CGTTGGAA -0.06798599449  
CGTTGGAC -0.324583669747  
CGTTGGAG -0.0579207893625  
CGTTGGCA -0.163053803674  
CGTTGGCC -0.334961422219  
CGTTGGGA -0.00793660017724  
CGTTGGGC -0.26976250432

CGTTGGTA 0.0210988915201  
CGTTGGTC -0.28828873309  
CGTTGTAA 0.00112785049807  
CGTTGTAC -0.127274523363  
CGTTGTAG -0.0324623255733  
CGTTGTCA -0.158392383476  
CGTTGTCC -0.260852501624  
CGTTGTGA 0.0516615899673  
CGTTGTGC 0.0347804866712  
CGTTGTTA -0.108054265863  
CGTTGTTC 0.0030552206064  
CGTTTAAA -0.0800983104436  
CGTTTAAC -0.106344502072  
CGTTTAAG 0.109887699214  
CGTTTACA -0.0494021195993  
CGTTTACC -0.212936411785  
CGTTTAGA -0.117620909867  
CGTTTAGC 0.0602182092891  
CGTTTATA -0.214930624163  
CGTTTATC 0.128974474453  
CGTTTCAA -0.09988668226  
CGTTTCAC -0.0552414762823  
CGTTTCAG -0.185439477512  
CGTTTCCA 0.0682385044698  
CGTTTCCC -0.101916993026  
CGTTTCGA 0.0575104584561  
CGTTTCGC -0.189872183793  
CGTTTCTA -0.0672107368733  
CGTTTCTC -0.068103987619  
CGTTTGAA 0.0445964559907  
CGTTTGAC -0.0549490957987  
CGTTTGAG -0.178451902294  
CGTTTGCA -0.070844036093  
CGTTTGCC -0.225668456149  
CGTTTGGA 0.0383929219996  
CGTTTGGC -0.132431575308  
CGTTTGTA 0.0847768337395  
CGTTTGTC -0.117956442293  
CGTTTTAA 0.233935317472  
CGTTTTAC -0.105733892312  
CGTTTTAG -0.126242377229  
CGTTTTCA 0.0107411798283  
CGTTTTCC 0.0148424380124  
CGTTTTGA 0.0379396510395  
CGTTTTGC -0.0181583041138  
CGTTTTTA -0.0961279877062  
CGTTTTTC -0.150868042945  
CTAAAAAA 0.186818822367  
CTAAAAAC 0.140803103163  
CTAAAAAG -0.0170009220839  
CTAAAACA 0.0196548167303  
CTAAAACC -0.0414157801142  
CTAAAAGA 0.0835309227425  
CTAAAAGC 0.0559348650736



CTAAAATA -0.00465619688231  
CTAAAATC 0.347468510743  
CTAAACAA 0.158248223962  
CTAAACAC -0.0389851880691  
CTAAACAG -0.0939244257841  
CTAAACCA 0.0244984237212  
CTAAACCC -0.216606587329  
CTAAACGA 0.066051167318  
CTAAACGC 0.0322737640376  
CTAAACTA -0.0407210066186  
CTAAACTC -0.0774939745253  
CTAAAGAA 0.0761446705522  
CTAAAGAC 0.102587744573  
CTAAAGAG -0.0637841408604  
CTAAAGCA -0.10835871683  
CTAAAGCC -0.108050391944  
CTAAAGGA 0.0173816892752  
CTAAAGGC -0.111484243392  
CTAAAGTA -0.104604060663  
CTAAAGTC -0.135697993695  
CTAAATAA 0.171573470329  
CTAAATAC 0.136613252364  
CTAAATAG 0.0127366234219  
CTAAATCA -0.0015443174059  
CTAAATCC 0.248526312323  
CTAAATGA 0.201400894004  
CTAAATGC 0.0793790768963  
CTAAATTA 0.156394461959  
CTAAATTC 0.194751805748  
CTAACAAA 0.0814246073831  
CTAACAAC -0.158187206718  
CTAACAAG -0.0866925527187  
CTAACACA -0.183117410462  
CTAACACC -0.147928916727  
CTAACAGA 0.0763921374922  
CTAACAGC -0.229976297467  
CTAACATA 0.174717068848  
CTAACATC 0.0673878169712  
CTAACCAA -0.159963329712  
CTAACCCAC -0.210413260944  
CTAACCCAG 0.0550464579786  
CTAACCCA -0.118867867571  
CTAACCCC -0.120627394163  
CTAACCGA -0.0013669417982  
CTAACCGC -0.0638935214509  
CTAACCTA 0.131609838304  
CTAACCTC -0.221042407481  
CTAACGAA 0.189489053216  
CTAACGAC -0.0710411921921  
CTAACGAG -0.144637576197  
CTAACGCA 0.00257528918379  
CTAACGCC -0.0652256654909  
CTAACGGA 0.0378288231227  
CTAACGGC -0.165072623614

CTAACGTA 0.00994433727659  
CTAACGTC -0.264384087791  
CTAACTAA 0.0559088651828  
CTAACTAC -0.179890260631  
CTAACTAG -0.275037443013  
CTAACTCA -0.0677102552555  
CTAACTCC -0.00100426400619  
CTAACTGA -0.0414170409841  
CTAACTGC -0.240770919067  
CTAACTTA 0.065751892261  
CTAACTTC -0.0898767053246  
CTAAGAAA 0.089829085161  
CTAAGAAC 0.0480022983903  
CTAAGAAG -0.106625071338  
CTAAGACA -0.128637353834  
CTAAGACC -0.238713144517  
CTAAGAGA 0.0384018001701  
CTAAGAGC -0.344359961818  
CTAAGATA 0.164387721006  
CTAAGATC 0.23171879767  
CTAAGCAA -0.0642944721107  
CTAAGCAC 0.225604952459  
CTAAGCAG -0.190549714873  
CTAAGCCA -0.297082722938  
CTAAGCCC -0.0904104938272  
CTAAGCGA -0.113621523148  
CTAAGCGC -0.133938506504  
CTAAGCTA -0.221323856193  
CTAAGCTC -0.208694679531  
CTAAGGAA 0.0557658657834  
CTAAGGAC -0.243783715557  
CTAAGGAG 0.0355688379547  
CTAAGGCA -0.156561577614  
CTAAGGCC -0.0421262910644  
CTAAGGGA -0.0525249846608  
CTAAGGGC -0.223832567939  
CTAAGGTA 0.00280810733856  
CTAAGGTC -0.267392617723  
CTAAGTAA 0.111416035913  
CTAAGTAC 0.0109671233275  
CTAAGTAG -0.0219575113368  
CTAAGTCA -0.124406563969  
CTAAGTCC -0.241301353702  
CTAAGTGA 0.0964764947987  
CTAAGTGC -0.211909949165  
CTAAGTTA 0.0922914880944  
CTAAGTTC -0.231417000049  
CTAATAAA 0.209575348217  
CTAATAAC 0.00685937963054  
CTAATAAG -0.0107608269289  
CTAATACA 0.122204465881  
CTAATACC -0.0578690453707  
CTAATAGA 0.0819364859821  
CTAATAGC 0.0840425377363

CTAATATA 0.0997056812361  
CTAATATC 0.274868822587  
CTAATCAA -0.139164354307  
CTAATCAC -0.129487592933  
CTAATCAG 0.0650637971506  
CTAATCCA 0.136030128673  
CTAATCCC -0.0649081209247  
CTAATCGA -0.0863078577936  
CTAATCGC 0.0349822187099  
CTAATCTA 0.0632038427344  
CTAATCTC 0.143598274084  
CTAATGAA 0.0292141850566  
CTAATGAC -0.138637202128  
CTAATGAG -0.0502415276515  
CTAATGCA -0.159632716049  
CTAATGCC -0.159571315686  
CTAATGGA -0.0531763672786  
CTAATGGC -0.229163398693  
CTAATGTA 0.158804254759  
CTAATGTC 0.020689271955  
CTAATTAA 0.0864425493586  
CTAATTAC 0.0899786439644  
CTAATTAG 0.0302192376062  
CTAATTCA 0.0469760144117  
CTAATTCC 0.122897732886  
CTAATTGA -0.0222041098597  
CTAATTGC 0.0338021007366  
CTAATTTA 0.188829485857  
CTAATTTTC 0.0523135705258  
CTACAAA 0.0810884981009  
CTACAAAC 0.00990270163481  
CTACAAAG -0.087211025489  
CTACAACA -0.0453762471599  
CTACAACC 0.101678961119  
CTACAAGA 0.0895862148456  
CTACAAGC -0.151884281962  
CTACAATA -0.0141084326769  
CTACAATC 0.292045073411  
CTACACAA 0.177538155685  
CTACACAC -0.330227039712  
CTACACAG -0.0276190199468  
CTACACCA -0.147226200864  
CTACACCC -0.0174988740866  
CTACACGA -0.0949850443182  
CTACACGC -0.0945580359103  
CTACACTA -0.0560955911404  
CTACACTC -0.264074750767  
CTACAGAA 0.0450438016649  
CTACAGAC 0.0706861163248  
CTACAGAG -0.0491752349508  
CTACAGCA -0.196932027112  
CTACAGCC 0.00461964890668  
CTACAGGA -0.15977057852  
CTACAGGC -0.266282011183

CTACAGTA -0.0358066371861  
CTACAGTC -0.0640056368312  
CTACATAA 0.0856879404597  
CTACATAC 0.0211256010011  
CTACATAG -0.0799048418696  
CTACATCA 0.0687068702512  
CTACATCC -0.202564186983  
CTACATGA 0.185339079324  
CTACATGC -0.160500535112  
CTACATTA 0.0704066363517  
CTACATTC -0.117755488306  
CTACCAA -0.087689044499  
CTACCAAC -0.0590471574632  
CTACCAAG -0.154363060645  
CTACCACA -0.0591387851757  
CTACCACC -0.0815319690709  
CTACCAGA 0.0340073327625  
CTACCAGC -0.100119084858  
CTACCATA -0.0604945588647  
CTACCATC -0.189143288829  
CTACCCAA -0.162385017229  
CTACCCAC -0.28762959763  
CTACCCAG -0.00642860255982  
CTACCCCA -0.108919118373  
CTACCCCC -0.14625708061  
CTACCCGA -0.00543290364005  
CTACCCGC -0.138699002272  
CTACCCTA -0.0442985017388  
CTACCCTC -0.240556694683  
CTACCGAA 0.0457584140157  
CTACCGAC -0.111851888433  
CTACCGAG 0.127292141851  
CTACCGCA -0.0688424428891  
CTACCGCC -0.195476064092  
CTACCGGA 0.0169903970479  
CTACCGGC -0.187216679289  
CTACCGTA 0.146945505789  
CTACCGTC -0.152589141523  
CTACCTAA -0.107870576162  
CTACCTAC 0.0206343717755  
CTACCTAG -0.132827183913  
CTACCTCA -0.0538678737549  
CTACCTCC -0.222631630939  
CTACCTGA -0.00694856028054  
CTACCTGC -0.170524915477  
CTACCTTA -0.149581618656  
CTACCTTC -0.218485527268  
CTACGAAA 0.121908096407  
CTACGAAC -0.253079713127  
CTACGAAG -0.0671108864349  
CTACGACA -0.176926607103  
CTACGACC -0.235685164151  
CTACGAGA 0.0672715122107  
CTACGAGC -0.158238954971

CTACGATA 0.158036116398  
CTACGATC 0.255735581462  
CTACGCAA 0.0766372477991  
CTACGCAC -0.162631296035  
CTACGCAG 0.0552921030099  
CTACGCCA -0.170833625774  
CTACGCCC -0.0537425297575  
CTACGCGA 0.0281391193178  
CTACGCGC -0.0696658659096  
CTACGCTA -0.0577266717999  
CTACGCTC -0.155121233546  
CTACGGAA 0.153866604681  
CTACGGAC -0.267898167303  
CTACGGAG -0.0593841684822  
CTACGGCA -0.158043572985  
CTACGGCC -0.24888970315  
CTACGGGA 0.0408621020274  
CTACGGGC -0.199526193015  
CTACGGTA 0.0573431348336  
CTACGGTC -0.0122581707417  
CTACGTAA -2.90543956395E-5  
CTACGTAC -0.122844545906  
CTACGTAG -0.0282746979947  
CTACGTCA 0.105801763311  
CTACGTCC -0.0339967748028  
CTACGTGA -0.0353528017291  
CTACGTGC -0.00786027850168  
CTACGTTA 0.00715438319173  
CTACGTTC -0.00369444888353  
CTACTAAA 0.137148123978  
CTACTAAC 0.0224935713974  
CTACTAAG -0.202527233115  
CTACTACA 0.0144712565194  
CTACTACC -0.289628459192  
CTACTAGA -0.0079612976334  
CTACTAGC -0.172636783161  
CTACTATA 0.166650200883  
CTACTATC 0.131126549268  
CTACTCAA -0.0425564611289  
CTACTCAC 0.0237354277811  
CTACTCAG -0.137010397028  
CTACTCCA 0.0255473392123  
CTACTCCC -0.0405864340995  
CTACTCGA 0.243599726875  
CTACTCGC -0.05007244945  
CTACTCTA -0.115555555556  
CTACTCTC -0.253169939482  
CTACTGAA 0.156722792846  
CTACTGAC -0.120475364542  
CTACTGAG -0.0220735106897  
CTACTGCA 0.0204882720318  
CTACTGCC -0.183944069431  
CTACTGGA 0.153888422404  
CTACTGGC -0.14090006146

CTACTGTA 0.0457033690236  
CTACTGTC 0.0505946887471  
CTACTTAA 0.0991719088228  
CTACTTAC 0.0249581515326  
CTACTTCA -0.0119047619048  
CTACTTCC -0.0113613910294  
CTACTTGA -0.1200687427  
CTACTTGC 0.0155002387185  
CTACTTTA 0.0312685240071  
CTACTTTC -0.0483922750173  
CTAGAAAA 0.198338602384  
CTAGAAAC -0.19456515775  
CTAGAAAG 0.0322214635422  
CTAGAACA -0.0478084041362  
CTAGAACC -0.103734204793  
CTAGAAGA 0.0501602669652  
CTAGAAGC -0.166723855126  
CTAGAATA 0.0279808557817  
CTAGAATC 0.358177037177  
CTAGACAA -0.0993557026354  
CTAGACAC -0.101954199626  
CTAGACAG -0.0647549124511  
CTAGACCA -0.0832532034988  
CTAGACCC -0.247561365287  
CTAGACGA 0.130241308675  
CTAGACGC -0.0728292008298  
CTAGACTA -0.178484730344  
CTAGACTC -0.31144523449  
CTAGAGAA 0.0994505916705  
CTAGAGAC -0.0764478912819  
CTAGAGAG -0.130203340595  
CTAGAGCA -0.104613898766  
CTAGAGCC -0.156253168111  
CTAGAGGA 0.00517048508709  
CTAGAGGC -0.0493000220977  
CTAGAGTA -0.056562712683  
CTAGAGTC -0.151916238641  
CTAGATAA 0.12388169883  
CTAGATAC 0.335520538321  
CTAGATAG -0.0156189618352  
CTAGATCA 0.101967079744  
CTAGATCC 0.292871869938  
CTAGATGA 0.0810526927491  
CTAGATGC -0.10190536565  
CTAGATTA 0.323186552962  
CTAGATTC 0.481701025269  
CTAGCAAA 0.0632792410617  
CTAGCAAC -0.0132502483221  
CTAGCAAG -0.109017729271  
CTAGCACA 0.00624264524283  
CTAGCACC -0.166589199757  
CTAGCAGA 0.13584472564  
CTAGCAGC -0.114618828913  
CTAGCATA 0.116843948275

CTAGCATC -0.0578799754111  
CTAGCCAA 0.0374253628347  
CTAGCCAC -0.213259259259  
CTAGCCAG -0.274683433186  
CTAGCCCA -0.160504192458  
CTAGCCCC -0.18580804838  
CTAGCCGA -0.0697243627742  
CTAGCCGC -0.247830516492  
CTAGCCTA -0.13323741269  
CTAGCCTC -0.229855349225  
CTAGCGAA -0.0461508288176  
CTAGCGAC -0.187148165523  
CTAGCGAG -0.0465762538531  
CTAGCGCA -0.0546691612243  
CTAGCGCC -0.318861523178  
CTAGCGGA 0.0111879476414  
CTAGCGGC -0.383242798354  
CTAGCGTA 0.0814478520477  
CTAGCGTC -0.180405034465  
CTAGCTAA -0.204958468793  
CTAGCTAC -0.183767960135  
CTAGCTAG -0.0555550069129  
CTAGCTCA -0.231106501602  
CTAGCTCC -0.0460337844512  
CTAGCTGA 0.0175779093619  
CTAGCTGC -0.295417510246  
CTAGCTTA -0.0954372331434  
CTAGCTTC -0.248939695708  
CTAGGAAA 0.161271378076  
CTAGGAAC -0.155116522931  
CTAGGAAG 0.0127548796857  
CTAGGACA 0.00896227100373  
CTAGGACC -0.309557124906  
CTAGGAGA 0.00861069545131  
CTAGGAGC -0.0805619616398  
CTAGGATA 0.219543788009  
CTAGGATC 0.183518079991  
CTAGGCAA -0.0969368998628  
CTAGGCAC -0.233369549114  
CTAGGCAG -0.131398464122  
CTAGGCCA -0.202934575644  
CTAGGCCC -0.444713226259  
CTAGGCCG -0.0715493547019  
CTAGGCCG -0.135987721836  
CTAGGCTA -0.180156064797  
CTAGGCTC -0.121175715174  
CTAGGGAA -0.0014955681787  
CTAGGGAC -0.0382646390572  
CTAGGGAG -0.183236209196  
CTAGGGCA -0.055664019942  
CTAGGGCC -0.115787876864  
CTAGGGGA -0.0667396792289  
CTAGGGGC -0.284553849193  
CTAGGGTA -0.0472219478196

CTAGGGTC 0.0611188266673  
CTAGGTAA -0.0180921721647  
CTAGGTAC -0.313845546119  
CTAGGTCA -0.171156605461  
CTAGGTCC -0.217496579352  
CTAGGTGA -0.0702530049374  
CTAGGTGC -0.081094747241  
CTAGGTTA -0.00649965161867  
CTAGGTTC -0.0560274581461  
CTAGTAAA -0.025200882566  
CTAGTAAC -0.12686456584  
CTAGTAAG -0.113564068523  
CTAGTACA -0.051246143029  
CTAGTACC -0.188634829704  
CTAGTAGA 0.0720158510615  
CTAGTAGC -0.232783024386  
CTAGTATA 0.180430142193  
CTAGTATC 0.129130167512  
CTAGTCAA -0.230120551924  
CTAGTCAC -0.151297650487  
CTAGTCAG -0.0356235944936  
CTAGTCCA 0.00452086396151  
CTAGTCCC -0.280291852076  
CTAGTCGA -0.0856604974862  
CTAGTCGC -0.216757201646  
CTAGTCTA -0.105987761038  
CTAGTCTC -0.180276338113  
CTAGTGAA -0.10853232418  
CTAGTGAC -0.176906275052  
CTAGTGAG -0.162292904847  
CTAGTGCA 0.0897165231906  
CTAGTGCC -0.278625616929  
CTAGTGGA -0.0385788793166  
CTAGTGGC -0.174604119884  
CTAGTGTA 0.104071062902  
CTAGTGTC -0.106130211421  
CTAGTTAA -0.0673258468902  
CTAGTTAC 0.0475949036073  
CTAGTTCA -0.186598902488  
CTAGTTCC -0.0315386515189  
CTAGTTGA 0.0531542953742  
CTAGTTGC -0.0468999030204  
CTAGTTTA 0.0290327780623  
CTAGTTTC 0.0854930953479  
CTATAAAA 0.193336487987  
CTATAAAC 0.0300829875519  
CTATAAAG -0.091440959359  
CTATAACA 0.138117741334  
CTATAACC -0.089891476472  
CTATAAGA 0.167876901798  
CTATAAGC -0.0849030714176  
CTATAATA 0.113635901385  
CTATAATC 0.203764078245  
CTATACAA 0.137958572087



CTATACAC -0.0573281965162  
CTATACAG -0.0606333053401  
CTATACCA 0.033854401232  
CTATACCC 0.0183193443328  
CTATACGA -0.0585373294786  
CTATACGC -0.0159662554757  
CTATACTA 0.0627315386515  
CTATACTC -0.0461611650384  
CTATAGAA 0.17095051483  
CTATAGAC -0.307435172285  
CTATAGAG -0.206713808478  
CTATAGCA 0.0851535423551  
CTATAGCC -0.208209876543  
CTATAGGA 0.152676929832  
CTATAGGC -0.18308835229  
CTATAGTA -0.0131884446085  
CTATAGTC -0.227416150841  
CTATATAA 0.0899931718798  
CTATATAC 0.204304704823  
CTATATAG 0.171336164329  
CTATATCA 0.193896822745  
CTATATCC 0.187015336363  
CTATATGA -0.0135184087466  
CTATATGC 0.134300408234  
CTATATTA 0.200248427353  
CTATATTC 0.204611404722  
CTATCAAA -0.225162898386  
CTATCAAC -0.0169896286436  
CTATCAAG 0.0164558838059  
CTATCACA 0.0601731727514  
CTATCACC -0.119519222853  
CTATCAGA 0.101987418825  
CTATCAGC -0.0442215216539  
CTATCATA 0.0307004544556  
CTATCATC 0.015055236768  
CTATCCAA 0.0642796768315  
CTATCCAC 0.00470372565808  
CTATCCAG 0.0155327230016  
CTATCCCA -0.00361149531274  
CTATCCCC -0.172314151642  
CTATCCGA 0.146488812605  
CTATCCGC 0.141343541615  
CTATCCTA 0.0525605450874  
CTATCCTC -0.0535440849592  
CTATCGAA 0.047274770325  
CTATCGAC -0.0877233416743  
CTATCGAG -0.141805788798  
CTATCGCA -0.087090494385  
CTATCGCC -0.178864197531  
CTATCGGA 0.108298206327  
CTATCGGC 0.0106396408264  
CTATCGTA -0.0178765998867  
CTATCGTC -0.102142747371  
CTATCTAA 0.104338861777

CTATCTAC 0.0662225967196  
CTATCTCA 0.156847570748  
CTATCTCC 0.0790961382248  
CTATCTGA 0.230280534046  
CTATCTGC -0.10670824703  
CTATCTTA 0.130356868427  
CTATCTTC -0.0133915095634  
CTATGAAA 0.0716892796768  
CTATGAAC -0.0286767611035  
CTATGAAG 0.00172446355672  
CTATGACA -0.111753389401  
CTATGACC -0.242193173566  
CTATGAGA -0.0314965205643  
CTATGAGC -0.255526506899  
CTATGATA 0.122376451733  
CTATGATC 0.155725153132  
CTATGCAA 0.103736579838  
CTATGCAC -0.14136238199  
CTATGCAG -0.0101709391777  
CTATGCCA -0.146596927081  
CTATGCCC -0.249384087791  
CTATGCGA 0.0281180706492  
CTATGCGC 0.0572269115105  
CTATGCTA -0.134420462839  
CTATGCTC -0.222112477434  
CTATGGAA 0.193115220897  
CTATGGAC -0.210829583451  
CTATGGAG -0.0170451443501  
CTATGGCA -0.128209262665  
CTATGGCC -0.212226721981  
CTATGGGA 0.029414670289  
CTATGGGC -0.172347106407  
CTATGGTA -0.0970479275929  
CTATGGTC -0.276569213294  
CTATGTAA 0.138548596017  
CTATGTAC -0.118512115474  
CTATGTCA 0.105139976465  
CTATGTCC 0.0149317218819  
CTATGTGA 0.0215234962898  
CTATGTGC -0.215321677861  
CTATGTTA 0.0901181119521  
CTATGTTC -0.181307055668  
CTATTTAA -0.0295657453973  
CTATTTAAC 0.0641886885651  
CTATTTAAG -0.228377204829  
CTATTTACA 0.18798711278  
CTATTTACC -0.0308416344228  
CTATTTAGA 0.221125041768  
CTATTTAGC -0.0531424263301  
CTATTTATA 0.0901196532648  
CTATTTATC -0.132242200707  
CTATTTCAA 0.029080528235  
CTATTTCAC -0.180141744402  
CTATTTCAG 0.0360248717911

CTATTCCA 0.0981665770779  
CTATTCCC 0.00350721201344  
CTATTCGA 0.145933147288  
CTATTCGC 0.163754967178  
CTATTCTA 0.0377444685895  
CTATTCTC -0.0590490460822  
CTATTGAA 0.038892682289  
CTATTGAC -0.037256580825  
CTATTGAG -0.130536404812  
CTATTGCA 0.11887224637  
CTATTGCC -0.11225800079  
CTATTGGA 0.0133668378939  
CTATTGGC -0.302252321599  
CTATTGTA 0.165114116775  
CTATTGTC -0.0298113021142  
CTATTTAA -0.051718228032  
CTATTTAC -0.102655702933  
CTATTTCA -0.138566481728  
CTATTTCC 0.0615910972934  
CTATTTGA 0.0786061917975  
CTATTTGC 0.136961922334  
CTATTTTA -0.00453997355919  
CTATTTTC 0.171683640114  
CTCAAAAA 0.248443256538  
CTCAAAAC 0.0724027719263  
CTCAAAAAG -0.13491436317  
CTCAAACA -0.0506682033973  
CTCAAACC -0.112156862745  
CTCAAAGA 0.0710616015413  
CTCAAAGC 0.0516830589979  
CTCAAATA -0.014255198301  
CTCAAATC 0.20026675888  
CTCAACAA -0.0292696705522  
CTCAACAC -0.023859195444  
CTCAACAG -0.113950069582  
CTCAACCA -0.129311246427  
CTCAACCC -0.0341181636069  
CTCAACGA 0.0562780636321  
CTCAACGC -0.106730573711  
CTCAACTA 0.0124120378172  
CTCAACTC -0.195249234643  
CTCAAGAA 0.18042657358  
CTCAAGAC -0.182891292537  
CTCAAGAG -0.11367610748  
CTCAAGCA -0.165333135773  
CTCAAGCC -0.170927473345  
CTCAAGGA -0.0562392685627  
CTCAAGGC -0.0717398224066  
CTCAAGTA 0.0468089433847  
CTCAAGTC -0.121711934156  
CTCAATAA 0.0265526709572  
CTCAATAC 0.0662006849766  
CTCAATCA -0.0798700300775  
CTCAATCC 0.074762892709

CTCAATGA -0.0636889282757  
CTCAATGC -0.0592724198244  
CTCAATTA -0.0084014934697  
CTCAATTC -0.065511851288  
CTCACAAA -0.132094314671  
CTCACAAC 0.108187933113  
CTCACAAAG -0.191848946986  
CTCACACA 0.0468888469194  
CTCACACC -0.0569610506588  
CTCACAGA 0.00372350471431  
CTCACAGC -0.248765554019  
CTCACATA -0.00426933256634  
CTCACATC -0.00997502812766  
CTCACCAA -0.0851870146264  
CTCACACC -0.0065441793846  
CTCACACAG -0.172013453382  
CTCACCCA -0.0764231531115  
CTCACCCC -0.211117146478  
CTCACCGA 0.121061933303  
CTCACCGC -0.12724713552  
CTCACCTA -0.115655667523  
CTCACCTC -0.153165152673  
CTCACGAA -0.086503585911  
CTCACGAC -0.101016867529  
CTCACGAG 0.069205690575  
CTCACGCA -0.0647896599984  
CTCACGCC -0.0977942386831  
CTCACGGA -0.179321573081  
CTCACGGC -0.178626211449  
CTCACGTA -0.0959259926434  
CTCACGTC -0.151615682659  
CTCACTAA -0.177575837394  
CTCACTAC -0.0286037296805  
CTCACTCA -0.0999345582062  
CTCACTCC -0.0235921692593  
CTCACTGA -0.127196295349  
CTCACTGC -0.0936275236128  
CTCACTTA -0.189313622196  
CTCACTTC -0.100072983889  
CTCAGAAA -0.0342638487777  
CTCAGAAC 0.0612362510703  
CTCAGAAAG -0.0729773782476  
CTCAGACA -0.0622070751973  
CTCAGACC -0.177634574973  
CTCAGAGA -0.059821597199  
CTCAGAGC -0.196204128881  
CTCAGATA 0.225526356232  
CTCAGATC 0.141731980944  
CTCAGCAA 0.156051724516  
CTCAGCAC -0.0755595826498  
CTCAGCAG -0.0707860859561  
CTCAGCCA -0.185345679012  
CTCAGCCC -0.211647789631  
CTCAGCGA 0.0137370423044

CTCAGCGC -0.149382945592  
CTCAGCTA -0.0218781213299  
CTCAGCTC -0.0739230988256  
CTCAGGAA -0.0275170952836  
CTCAGGAC -0.208374604595  
CTCAGGAG -0.166745098039  
CTCAGGCA 0.047781043169  
CTCAGGCC -0.155941327539  
CTCAGGGA 0.00940688404955  
CTCAGGGC -0.125231172794  
CTCAGGTA -0.0110813464969  
CTCAGGTC -0.173645466879  
CTCAGTAA 0.078696264873  
CTCAGTAC -0.194186786276  
CTCAGTCA -0.173884188544  
CTCAGTCC -0.188312555913  
CTCAGTGA -0.203478339182  
CTCAGTGC -0.0431045251327  
CTCAGTTA -0.0673170330123  
CTCAGTTC -0.244058691513  
CTCATAAA -0.0102968047805  
CTCATAAC -0.114145070345  
CTCATAAG -0.232620540932  
CTCATACA 0.0852584579244  
CTCATACC 0.0720366684584  
CTCATAGA 0.137589464094  
CTCATAGC -0.0617693541265  
CTCATATA 0.0834787810929  
CTCATATC 0.101528273581  
CTCATCAA -0.00861898646646  
CTCATCAC 0.0778710792788  
CTCATCAG 0.0630886517816  
CTCATCCA -0.022777530852  
CTCATCCC -0.103165588424  
CTCATCGA -0.181917562491  
CTCATCGC -0.0260983507588  
CTCATCTA -0.141728896294  
CTCATCTC -0.168235468418  
CTCATGAA 0.0458215328547  
CTCATGAC -0.0265264399989  
CTCATGAG -0.195519855644  
CTCATGCA -0.034090721989  
CTCATGCC -0.141267996455  
CTCATGGA -0.138769541431  
CTCATGGC -0.153544886672  
CTCATGTA 0.156827393837  
CTCATGTC -0.0883318240443  
CTCATTAA -0.0622245144044  
CTCATTAC 0.12908077016  
CTCATTCA -0.232265107212  
CTCATTCC -0.0442244272369  
CTCATTGA 0.0204971569079  
CTCATTGC -0.076793672748  
CTCATTTA 0.125246611364

CTCATTTTC -0.147039938172  
CTCCAAAA -0.0467774155663  
CTCCAAAC -0.0254346108258  
CTCCAAAG -0.274284237246  
CTCCAACA 0.0618756723529  
CTCCAACC -0.225170660857  
CTCCAAGA -0.00714738132732  
CTCCAAGC -0.308272574159  
CTCCAATA 0.0233987458272  
CTCCAATC -0.0980104826981  
CTCCACAA -0.118384010107  
CTCCACAC -0.164024952268  
CTCCACAG -0.314279993856  
CTCCACCA -0.190014409557  
CTCCACCC -0.0439288121412  
CTCCACGA -0.0751369256025  
CTCCACGC -0.265205469903  
CTCCACTA 0.0922130373513  
CTCCACTC -0.123481769615  
CTCCAGAA -0.12921530213  
CTCCAGAC -0.273300106593  
CTCCAGAG -0.232807552651  
CTCCAGCA -0.215511991177  
CTCCAGCC -0.235209876543  
CTCCAGGA -0.0684408664109  
CTCCAGGC -0.3133096308  
CTCCAGTA -0.0879564270153  
CTCCAGTC -0.0565790773486  
CTCCATAA -0.0819563290863  
CTCCATAC -0.228989729409  
CTCCATCA -0.0647528304585  
CTCCATCC -0.320224327511  
CTCCATGA -0.135596382633  
CTCCATGC -0.217950828217  
CTCCATTA 0.0522695841154  
CTCCATTC -0.0339531910566  
CTCCCAA -0.0988715830087  
CTCCCAAC -0.184502057613  
CTCCCAAG -0.333720126407  
CTCCCACA -0.0995735446631  
CTCCCACC 0.020739639279  
CTCCCAGA -0.00483266350208  
CTCCCAGC -0.262635019939  
CTCCCATA -0.259833986507  
CTCCCATC -0.108439632458  
CTCCCCAA -0.12638635079  
CTCCCCAC -0.0343810281916  
CTCCCCAG -0.151244321548  
CTCCCCCA -0.278493917812  
CTCCCCCC -0.150141650422  
CTCCCCGA -0.105404382109  
CTCCCCGC -0.19567364678  
CTCCCCTA -0.107615056047  
CTCCCCTC -0.13948746075

CTCCCGAA 0.0525854405373  
CTCCCGAC -0.11571284314  
CTCCCGAG -0.165337140832  
CTCCCGCA -0.0791262911685  
CTCCCGCC -0.193739299355  
CTCCCGGA 0.0857181277306  
CTCCCGGC -0.148502470466  
CTCCCGTA -0.148081437237  
CTCCCGTC -0.369212317628  
CTCCCTAA -0.207307189542  
CTCCCTAC -0.251693850568  
CTCCCTCA -0.0670984478536  
CTCCCTCC -0.0427347261323  
CTCCCTGA -0.0242432430077  
CTCCCTGC -0.222422657952  
CTCCCTTA -0.0356933124777  
CTCCCTTC -0.0929758007593  
CTCCGAAA 0.104541426351  
CTCCGAAC -0.270018094632  
CTCCGAAG -0.187608040697  
CTCCGACA -0.222254175744  
CTCCGACC -0.236110425206  
CTCCGAGA -0.0337092834994  
CTCCGAGC -0.241176470588  
CTCCGATA -0.101035389707  
CTCCGATC 0.176288173176  
CTCCGCAA -9.05483940008E-5  
CTCCGCAC -0.0384298036891  
CTCCGCAG -0.153748068455  
CTCCGCCA -0.136230250275  
CTCCGCCC -0.187621465693  
CTCCGCGA 0.0306620342927  
CTCCGCGC -0.0490883733093  
CTCCGCTA -0.0985858415666  
CTCCGCTC -0.116592696727  
CTCCGGAA -0.136335905362  
CTCCGGAC -0.176141321348  
CTCCGGAG 0.303866026818  
CTCCGGCA -0.230618505489  
CTCCGGCC -0.138979423868  
CTCCGGGA 0.0509643460888  
CTCCGGGC -0.312683714608  
CTCCGGTA -0.155739172305  
CTCCGGTC 0.00683125895194  
CTCCGTAA 0.0643467700228  
CTCCGTAC -0.169060275962  
CTCCGTCA -0.15156578377  
CTCCGTCC -0.233511659808  
CTCCGTGA -0.159932826237  
CTCCGTGC -0.282806336038  
CTCCGTTA 0.0711678631803  
CTCCGTTC 0.0901337021669  
CTCCTAAA -0.092614007816  
CTCCTAAC -0.0761835308064

CTCCTAAG -0.14196616234  
CTCCTACA -0.0952029584613  
CTCCTACC -0.16932932869  
CTCCTAGA -0.0681477639465  
CTCCTAGC -0.0787896747004  
CTCCTATA 0.112235410341  
CTCCTATC -0.143954361355  
CTCCTCAA 0.00715367644638  
CTCCTCAC -0.312864724182  
CTCCTCAG -0.404674227133  
CTCCTCCA -0.120713305898  
CTCCTCCC -0.234361839927  
CTCCTCGA -0.187356202311  
CTCCTCGC -0.110576052419  
CTCCTCTA -0.174254521709  
CTCCTCTC -0.0776465359219  
CTCCTGAA -0.0926459692299  
CTCCTGAC -0.0143369279755  
CTCCTGCA -0.336631808279  
CTCCTGCC -0.194275728496  
CTCCTGGA -0.121233823965  
CTCCTGGC -0.202611635736  
CTCCTGTA -0.0280590543618  
CTCCTGTC -0.124774498668  
CTCCTTAA 0.00806880420728  
CTCCTTAC -0.167374520552  
CTCCTTCA -0.188184754447  
CTCCTTCC -0.352238407211  
CTCCTTGA -0.0413682390714  
CTCCTTGC -0.0683522140991  
CTCCTTTA -0.18030072217  
CTCCTTTC -0.0642654320988  
CTCGAAAA 0.0785807699608  
CTCGAAAC -0.0279037670885  
CTCGAAAG -0.0278573624009  
CTCGAACA -0.0191797538971  
CTCGAACC -0.151680008365  
CTCGAAGA -0.0538789555138  
CTCGAAGC -0.253425070916  
CTCGAATA 0.185598477474  
CTCGAATC 0.225001089594  
CTCGACAA 0.0835216328345  
CTCGACAC -0.0739862244468  
CTCGACAG -0.138398960364  
CTCGACCA -0.11796953076  
CTCGACCC -0.30526141532  
CTCGACGA -0.232057127494  
CTCGACGC -0.116507278104  
CTCGACTA -0.192880194955  
CTCGACTC -0.0604518674321  
CTCGAGAA 0.19810486796  
CTCGAGAC -0.106391385953  
CTCGAGAG -0.167085120208  
CTCGAGCA 0.0475993000829



CTCGAGCC -0.287804985821  
CTCGAGGA 0.113962436058  
CTCGAGGC -0.242668686071  
CTCGAGTA 0.0578450745974  
CTCGAGTC -0.191656789148  
CTCGATAA -0.0358130804189  
CTCGATAC 0.129479279858  
CTCGATCA 0.00490405936464  
CTCGATCC -0.0133665232481  
CTCGATGA 0.0808057181875  
CTCGATGC 0.0126959452588  
CTCGATTA 0.160922852313  
CTCGATTC 0.281877878343  
CTCGCAA 0.0590325802981  
CTCGCAAC 0.125606903665  
CTCGCAAG -0.231556823431  
CTCGCACA -0.106465015697  
CTCGCACC -0.187438945416  
CTCGCAGA -0.20214379085  
CTCGCAGC -0.0487767735138  
CTCGCATA -0.109247433044  
CTCGCATC -0.109413630396  
CTCGCCAA -0.234897119342  
CTCGCCAC -0.0556653111846  
CTCGCCAG 0.0332732846164  
CTCGCCCA -0.21078140886  
CTCGCCCC -0.209885257807  
CTCGCCGA -0.129515312142  
CTCGCCGC -0.0899858964017  
CTCGCCTA 0.0697257071356  
CTCGCCTC -0.278155534384  
CTCGCGAA 0.0856493251783  
CTCGCGAC -0.217687718836  
CTCGCGAG 0.0210732784545  
CTCGCGCA -0.0180724457593  
CTCGCGCC -0.274496732672  
CTCGCGGA -0.0779819535006  
CTCGCGGC -0.0996525437516  
CTCGCGTA -0.0602167564976  
CTCGCGTC -0.276784832626  
CTCGCTAA 0.0490898261009  
CTCGCTAC -0.246479650521  
CTCGCTCA -0.0942918916546  
CTCGCTCC -0.202007453517  
CTCGCTGA -0.21595734176  
CTCGCTGC -0.0244571779841  
CTCGCTTA -0.096573260013  
CTCGCTTC -0.1625171404  
CTCGGAAA 0.041888954752  
CTCGGAAC -0.129968333697  
CTCGGAAG -0.325958975118  
CTCGGACA -0.00773978514752  
CTCGGACC -0.104092094215  
CTCGGAGA 0.163992561707

CTCGGAGC -0.108372817249  
CTCGGATA 0.244764865689  
CTCGGATC 0.177889965569  
CTCGGCAA -0.00211005196929  
CTCGGCAC -0.105982779342  
CTCGGCAG 0.0068905902692  
CTCGGCCA -0.186495591439  
CTCGGCCC -0.12176325345  
CTCGGCGA -0.0428114419916  
CTCGGCGC -0.180212586154  
CTCGGCTA -0.105639793001  
CTCGGCTC -0.240713421559  
CTCGGGAA -0.00260011155786  
CTCGGGAC -0.170697785657  
CTCGGGCA -0.192151053014  
CTCGGGCC -0.184548408057  
CTCGGGGA -0.0595555555556  
CTCGGGGC -0.0793455272271  
CTCGGGTA 0.0189962783157  
CTCGGGTC -0.215685144951  
CTCGGTAA -0.103765635669  
CTCGGTAC -0.0944858771944  
CTCGGTCA -0.0528406845797  
CTCGGTCC -0.265632488737  
CTCGGTGA 0.0631702284127  
CTCGGTGC -0.140764338201  
CTCGGTTA -0.106014524328  
CTCGGTTC -0.0160518937138  
CTCGTAAA 0.125220461116  
CTCGTAAC 0.000686074337527  
CTCGTAAG 0.0321112812407  
CTCGTACA -0.183570781137  
CTCGTACC 0.0904108761993  
CTCGTAGA -0.175042776259  
CTCGTAGC -0.256457746827  
CTCGTATA 0.0591943140968  
CTCGTATC 0.0848097653077  
CTCGTCAA -0.0627832523764  
CTCGTCAC -0.0643392339896  
CTCGTCAG -0.162282574906  
CTCGTCCA -0.246246372728  
CTCGTCCC -0.107173048488  
CTCGTCGA -0.226128172213  
CTCGTCGC 0.0137818612922  
CTCGTCTA -0.130654066098  
CTCGTCTC -0.130609037214  
CTCGTGAA -0.284349553936  
CTCGTGAC -0.210649291323  
CTCGTGCA -0.0771797251315  
CTCGTGCC -0.12339100418  
CTCGTGGA -0.242288343344  
CTCGTGGC -0.209244236874  
CTCGTGTA -0.0479332696656  
CTCGTGTC -0.152836601307

CTCGTTAA -0.0107906563287  
CTCGTTAC 0.09479077477  
CTCGTTCA -0.0884114047364  
CTCGTTCC -0.0907746482965  
CTCGTTGA -0.0411713699277  
CTCGTTGC -0.191927173358  
CTCGTTTA 0.106139497044  
CTCGTTTC -0.0393813891575  
CTCTAAAA 0.120762804891  
CTCTAAAC -0.0543300451818  
CTCTAAAG -0.00455278930383  
CTCTAACA -0.02546017172  
CTCTAACC -0.162061772405  
CTCTAAGA -0.0858473766315  
CTCTAAGC -0.213242354904  
CTCTAATA 0.118265494303  
CTCTAATC 0.0740502375314  
CTCTACAA 0.101569014862  
CTCTACAC 0.154956198335  
CTCTACAG -0.205037037037  
CTCTACCA -0.133104938272  
CTCTACCC -0.0321282165259  
CTCTACGA -0.0822412108839  
CTCTACGC -0.149190994916  
CTCTACTA -0.235793754539  
CTCTACTC -0.0279987155419  
CTCTAGAA 0.113749753013  
CTCTAGAC -0.113549341111  
CTCTAGAG 0.0126723646724  
CTCTAGCA -0.0344059686402  
CTCTAGCC -0.099079157589  
CTCTAGGA 0.0819476123371  
CTCTAGGC -0.312164863242  
CTCTAGTA -0.139289556302  
CTCTAGTC -0.143012145843  
CTCTATAA -0.0836359832879  
CTCTATAC 0.19313404246  
CTCTATCA -0.097793036071  
CTCTATCC -0.149580371434  
CTCTATGA -0.0428508309732  
CTCTATGC -0.183862383909  
CTCTATTA 0.103598564642  
CTCTATTC 0.022363279106  
CTCTCAA -0.0190882280302  
CTCTCAAC -0.113967501358  
CTCTCAAG -0.251659158701  
CTCTCACA -0.139156808516  
CTCTCACC -0.229411764706  
CTCTCAGA 0.0102773935761  
CTCTCAGC -0.0892346666047  
CTCTCATA 0.00475861160508  
CTCTCATC -0.0881063312535  
CTCTCCAA -0.10808910684  
CTCTCCAC -0.125935683641

CTCTCCAG -0.194599854757  
CTCTCCCA -0.386590530104  
CTCTCCCC -0.121176360498  
CTCTCCGA -0.140059273895  
CTCTCCGC -0.196935528121  
CTCTCCTA -0.117392807746  
CTCTCCTC -0.250065346569  
CTCTCGAA -0.0929890472192  
CTCTCGAC -0.179612343118  
CTCTCGCA -0.0846120320195  
CTCTCGCC -0.251168839721  
CTCTCGGA -0.0936003160338  
CTCTCGGC -0.168288225998  
CTCTCGTA -0.0112024755568  
CTCTCGTC -0.257180715356  
CTCTCTAA 0.0408655731989  
CTCTCTAC -0.0430653075097  
CTCTCTCA -0.123567184345  
CTCTCTCC -0.204046568506  
CTCTCTGA -0.196998835091  
CTCTCTGC -0.0551208225553  
CTCTCTTA -0.22802383186  
CTCTCTTC -0.324949750787  
CTCTGAAA 0.0698720090654  
CTCTGAAC -0.168696399935  
CTCTGAAG -0.114678169057  
CTCTGACA -0.169154322799  
CTCTGACC -0.260884236169  
CTCTGAGA 0.128423515756  
CTCTGAGC -0.139844617092  
CTCTGATA 0.143139805484  
CTCTGATC 0.156568796943  
CTCTGCAA 0.00463237392698  
CTCTGCAC -0.0996202642785  
CTCTGCAG -0.0784747948739  
CTCTGCCA -0.112517066086  
CTCTGCCC -0.108329702251  
CTCTGCGA 0.0216223188215  
CTCTGCGC -0.0802301461873  
CTCTGCTA -0.0782221912324  
CTCTGCTC -0.250605544874  
CTCTGGAA 0.0610915717208  
CTCTGGAC -0.114595852335  
CTCTGGCA -0.0181904028591  
CTCTGGCC -0.117610739035  
CTCTGGGA -0.0454031598646  
CTCTGGGC -0.146587577201  
CTCTGGTA -0.205574452387  
CTCTGGTC -0.233593570742  
CTCTGTAA 0.284873534497  
CTCTGTAC -0.116534385386  
CTCTGTCA -0.0617128463476  
CTCTGTCC -0.164067651852  
CTCTGTGA -0.028144141474

CTCTGTGC -0.145069088818  
CTCTGTTA -0.0927158451052  
CTCTGTTC -0.152503079462  
CTCTTAAA -0.00795846231531  
CTCTTAAC -0.0752095651795  
CTCTTAAG -0.102907688171  
CTCTTACA 0.013049944299  
CTCTTACC -0.114381990407  
CTCTTAGA -0.0775876261504  
CTCTTAGC -0.168389863548  
CTCTTATA 0.083362145609  
CTCTTATC 0.0420618454851  
CTCTTCAA 0.0777083666265  
CTCTTCAC -0.160583761359  
CTCTTCAG -0.0252771199861  
CTCTTCCA -0.229772663671  
CTCTTCCC -0.337176679697  
CTCTTCGA -0.201179607688  
CTCTTCGC -0.0374332871391  
CTCTTCTA 0.0119152076518  
CTCTTCTC -0.215166633735  
CTCTTGAA -0.130750851978  
CTCTTGAC -0.24875994513  
CTCTTGCA -0.0912918165389  
CTCTTGCC -0.140139775233  
CTCTTGGA -0.11268917109  
CTCTTGGC 0.0447372626502  
CTCTTGTA -0.00977873984862  
CTCTTGTC -0.138360796709  
CTCTTTAA 0.0665073438612  
CTCTTTAC 0.137848800193  
CTCTTTCA 0.144824430143  
CTCTTTCC -0.158968772694  
CTCTTTGA -0.163399560407  
CTCTTTGC -0.146251111331  
CTCTTTTA 0.21217860885  
CTCTTTTC -0.00086586375721  
CTGAAAAA -0.0507941996531  
CTGAAAAC -0.0262437155591  
CTGAAAAG -0.0801637816081  
CTGAAACA -0.103378445125  
CTGAAACC 0.0990005269051  
CTGAAAGA 0.142098993215  
CTGAAAGC -0.163632350037  
CTGAAATA 0.178758734909  
CTGAAATC 0.397368994523  
CTGAACAA -0.0751766332768  
CTGAACAC -0.260635964594  
CTGAACAG 0.0869307517534  
CTGAACCA -0.158111291527  
CTGAACCC -0.226839288516  
CTGAACGA 0.0283831882963  
CTGAACGC -0.173597392335  
CTGAACTA -0.0967806139497

CTGAACTC 0.0303683944763  
CTGAAGAA 0.0288974765011  
CTGAAGAC -0.225698216735  
CTGAAGCA -0.203052874071  
CTGAAGCC -0.260405177759  
CTGAAGGA -0.122119057026  
CTGAAGGC -0.25891415227  
CTGAAGTA 0.0432556148324  
CTGAAGTC -0.0588454698152  
CTGAATAA 0.125500098785  
CTGAATAC -0.0074949515494  
CTGAATCA 0.0748891303871  
CTGAATCC 0.0916667877326  
CTGAATGA -0.283809508136  
CTGAATGC -0.0754679705635  
CTGAATTA 0.0625233265275  
CTGAATTC -0.0443181138639  
CTGACAAA -0.0903796144291  
CTGACAAC -0.0279706666822  
CTGACAAG -0.136918939015  
CTGACACA -0.0512828956395  
CTGACACC -0.2677789267  
CTGACAGA 0.115928406433  
CTGACAGC -0.0889848605022  
CTGACATA -0.066205522114  
CTGACATC 0.0450074818764  
CTGACCAA -0.1077191902  
CTGACCAC -0.179268518519  
CTGACCAG -0.0519325074953  
CTGACCCA -0.242713305898  
CTGACCCC -0.200639231824  
CTGACCGA -0.0930188523915  
CTGACCGC -0.185363538082  
CTGACCTA -0.126995839822  
CTGACCTC -0.238673761935  
CTGACGAA -0.0655446897483  
CTGACGAC -0.165988925657  
CTGACGCA 0.0371551436084  
CTGACGCC -0.242985442251  
CTGACGGA -0.162232818622  
CTGACGGC -0.293821409279  
CTGACGTA -0.124290669213  
CTGACGTC 0.014324524574  
CTGACTAA -0.151482725317  
CTGACTAC -0.12830718436  
CTGACTCA -0.141129407116  
CTGACTCC -0.154184458969  
CTGACTGA -0.0961095195759  
CTGACTGC -0.217580824616  
CTGACTTA 0.0428413200665  
CTGACTTC -0.205382716049  
CTGAGAAA 0.0744628303285  
CTGAGAAC -0.17731739839  
CTGAGAAG -0.0823455814566

CTGAGACA -0.0931550901917  
CTGAGACC -0.236652236652  
CTGAGAGA 0.0251075764561  
CTGAGAGC -0.198739288308  
CTGAGATA 0.250441831873  
CTGAGATC 0.281271268304  
CTGAGCAA -0.0708711971553  
CTGAGCAC -0.158992600942  
CTGAGCAG -0.142220674167  
CTGAGCCA -0.11825483062  
CTGAGCCC -0.286206423654  
CTGAGCGA -0.0690912967065  
CTGAGCGC -0.0368547656123  
CTGAGCTA -0.0698177127218  
CTGAGCTC -0.297330589849  
CTGAGGAA 0.13748929724  
CTGAGGAC -0.149794271842  
CTGAGGCA -0.116220487998  
CTGAGGCC -0.401428409642  
CTGAGGGA -0.0555552126031  
CTGAGGGC -0.276051830685  
CTGAGGTA -0.0794158488661  
CTGAGGTC -0.214602671077  
CTGAGTAA -0.0268751906789  
CTGAGTAC -0.111091902927  
CTGAGTCA -0.109110518343  
CTGAGTCC -0.163070442992  
CTGAGTGA -0.0167149938114  
CTGAGTGC -0.101423543052  
CTGAGTTA -0.08384786367  
CTGAGTTC 0.0615475135473  
CTGATAAA -0.034024757096  
CTGATAAC 0.0742158557669  
CTGATAAG 0.0363811499704  
CTGATACA 0.0624286482689  
CTGATACC 0.1974933588  
CTGATAGA -0.0265121360211  
CTGATAGC -0.111489786734  
CTGATATA 0.179008615054  
CTGATATC 0.407934312499  
CTGATCAA -0.0680037191463  
CTGATCAC 0.0344506471693  
CTGATCAG 0.118181069959  
CTGATCCA -0.132714974238  
CTGATCCC 0.176117559891  
CTGATCGA -0.0138628180641  
CTGATCGC 0.214277481394  
CTGATCTA 0.080375691892  
CTGATCTC 0.235339154185  
CTGATGAA -0.250512746528  
CTGATGAC -0.168795715563  
CTGATGCA -0.0265142160979  
CTGATGCC -0.0643401945543  
CTGATGGA -0.0651364259651

CTGATGGC -0.0472511636285  
CTGATGTA 0.0132000639228  
CTGATGTC 0.0178242251383  
CTGATTAA 0.0861970076182  
CTGATTAC 0.375560715344  
CTGATTCA 0.166136882019  
CTGATTCC 0.386169290215  
CTGATTGA 0.141915941482  
CTGATTGC 0.39901902412  
CTGATTTA 0.168455948539  
CTGATTTT 0.429763340258  
CTGCAAAA 0.122266435345  
CTGCAAAC -0.0537373062339  
CTGCAAAG -0.151524043043  
CTGCAACA 0.0624931392566  
CTGCAACC -0.115852788479  
CTGCAAGA -0.0481353420598  
CTGCAAGC -0.137376428175  
CTGCAATA 0.15322385646  
CTGCAATC 0.397363279106  
CTGCACAA 0.156202693476  
CTGCACAC -0.1209112271  
CTGCACAG -0.0261431451964  
CTGCACCA -0.0715365907856  
CTGCACCC -0.183269090561  
CTGCACGA 0.029229511076  
CTGCACGC -0.192258533043  
CTGCACTA 0.0800735112519  
CTGCACTC -0.141757060008  
CTGCAGAA 0.102596869093  
CTGCAGAC -0.0413073265092  
CTGCAGCA -0.143328054857  
CTGCAGCC -0.178237037037  
CTGCAGGA -0.062040009879  
CTGCAGGC -0.301247126342  
CTGCAGTA -0.00262629256405  
CTGCAGTC 0.0589996487299  
CTGCATAA 0.173607136112  
CTGCATAC 0.0327415629131  
CTGCATCA -0.0308911831215  
CTGCATCC -0.0231008382607  
CTGCATGA -0.13218664583  
CTGCATGC 0.000106589021331  
CTGCATTA 0.0877558729098  
CTGCATTC 0.0854711409691  
CTGCCAAA 0.0389113921272  
CTGCCAAC -0.106774903975  
CTGCCAAG -0.279986230257  
CTGCCACA -0.0932672669008  
CTGCCACC -0.0975632783609  
CTGCCAGA 0.0921491145236  
CTGCCAGC -0.176998628258  
CTGCCATA -0.162287633347  
CTGCCATC -0.188039525508



CTGCCCAA -0.0370132578252  
CTGCCCAC -0.205383224009  
CTGCCCAG -0.092956711774  
CTGCCCCA 0.093090283629  
CTGCCCCC -0.21734091622  
CTGCCCGA -0.141159234201  
CTGCCCGC -0.266506632278  
CTGCCCTA 0.0270277337905  
CTGCCCTC -0.371956089274  
CTGCCGAA -0.234150302591  
CTGCCGAC -0.102528220916  
CTGCCGCA -0.133447785596  
CTGCCGCC -0.199913443552  
CTGCCGGA -0.137773803272  
CTGCCGGC -0.120380407234  
CTGCCGTA -0.167271787245  
CTGCCGTC -0.20003862899  
CTGCCTAA -0.0390694458165  
CTGCCTAC -0.120849999177  
CTGCCTCA -0.254966539905  
CTGCCTCC -0.322371506863  
CTGCCTGA -0.116418057888  
CTGCCTGC -0.0847440361535  
CTGCCTTA -0.0453393843955  
CTGCCTTC -0.0712317442822  
CTGCGAAA 0.0215345013063  
CTGCGAAC -0.159981806368  
CTGCGAAG -0.0105322184193  
CTGCGACA -0.201016136377  
CTGCGACC -0.234342821124  
CTGCGAGA -0.0881557212866  
CTGCGAGC -0.118034461896  
CTGCGATA 0.207991806256  
CTGCGATC 0.180359711185  
CTGCGCAA 0.137011631927  
CTGCGCAC -0.121246542868  
CTGCGCAG 0.0701895753745  
CTGCGCCA -0.101614036243  
CTGCGCCC -0.128059891545  
CTGCGCGA 0.205037432216  
CTGCGCGC -0.124318612504  
CTGCGCTA -0.0899057568503  
CTGCGCTC -0.26328540305  
CTGCGGAA -0.024818199281  
CTGCGGAC -0.111550133627  
CTGCGGCA -0.171034724966  
CTGCGGCC -0.300870792718  
CTGCGGGA -0.169627400634  
CTGCGGGC -0.103681990378  
CTGCGGTA -0.0400710153995  
CTGCGGTC -0.336091094711  
CTGCGTAA 0.116335211392  
CTGCGTAC -0.140611111111  
CTGCGTCA -0.157508464067

CTGCGTCC -0.265861064481  
CTGCGTGA 0.0937177545061  
CTGCGTGC -0.207565556343  
CTGCGTTA -0.092716994594  
CTGCGTTC -0.125624265973  
CTGCTAAA -0.0144363895225  
CTGCTAAC -0.225539422275  
CTGCTAAG -0.191497360247  
CTGCTACA -0.0311446979925  
CTGCTACC -0.0788150709366  
CTGCTAGA 0.196009181643  
CTGCTAGC -0.10201511335  
CTGCTATA -0.000937050542618  
CTGCTATC -0.0340155656546  
CTGCTCAA -0.172367908429  
CTGCTCAC -0.0589499222757  
CTGCTCCA -0.152128815569  
CTGCTCCC -0.273639086361  
CTGCTCGA -0.0806923385083  
CTGCTCGC -0.126874820253  
CTGCTCTA -0.0353248492232  
CTGCTCTC -0.0505369794153  
CTGCTGAA -0.0436515286215  
CTGCTGAC -0.119284274018  
CTGCTGCA -0.291391565268  
CTGCTGCC -0.169978213508  
CTGCTGGA -0.0757298474946  
CTGCTGGC -0.193023600276  
CTGCTGTA -0.0641092307412  
CTGCTGTC -0.132311963235  
CTGCTTAA -0.214126361656  
CTGCTTAC 0.0259603748889  
CTGCTTCA -0.126993925626  
CTGCTTCC -0.216539778718  
CTGCTTGA -0.069289858483  
CTGCTTGC -0.047929207242  
CTGCTTTA -0.0454772584656  
CTGCTTTC -0.176063100137  
CTGGAAAA 0.176321104744  
CTGGAAAC -0.102221097338  
CTGGAAAG 0.0584698553827  
CTGGAAACA -0.133680595905  
CTGGAAACC -0.201180072088  
CTGGAAGA 0.121014629611  
CTGGAAGC -0.251124071987  
CTGGAATA 0.266934464574  
CTGGAATC 0.342871878314  
CTGGACAA 0.0184032580298  
CTGGACAC -0.0747290140227  
CTGGACAG -0.222487009913  
CTGGACCA -0.107028846796  
CTGGACCC -0.359104084015  
CTGGACGA -0.0311666502025  
CTGGACGC -0.132262575641

CTGGACTA 0.0988219895288  
CTGGACTC -0.10834384134  
CTGGAGAA 0.0577564820303  
CTGGAGAC -0.207665670831  
CTGGAGCA -0.242281816585  
CTGGAGCC -0.301781482944  
CTGGAGGA -0.080067686997  
CTGGAGGC -0.209160493827  
CTGGAGTA -0.0489308217524  
CTGGAGTC -0.341884719822  
CTGGATAA -0.057956212863  
CTGGATAC 0.357815292084  
CTGGATCA 0.0193468249241  
CTGGATCC 0.128929558496  
CTGGATGA -0.0608409586057  
CTGGATGC -0.232466049383  
CTGGATTA 0.338504786948  
CTGGATTC 0.424037849349  
CTGGCAAA -0.195822383043  
CTGGCAAC -0.306976399724  
CTGGCAAG 0.0426244264419  
CTGGCACA -0.145851849109  
CTGGCACC -0.316564575764  
CTGGCAGA -0.114230914868  
CTGGCAGC -0.207130315501  
CTGGCATA 0.00254920039075  
CTGGCATC -0.0115534918439  
CTGGCAA -0.136944035282  
CTGGCCAC -0.150021125872  
CTGGCCAG 0.0278737902429  
CTGGCCCA -0.189056540192  
CTGGCCCC -0.0643003353034  
CTGGCCGA -0.0108421832551  
CTGGCCGC -0.224285424246  
CTGGCCTA -0.244111401906  
CTGGCCTC -0.0783974169013  
CTGGCGAA -0.076458168708  
CTGGCGAC -0.210283224401  
CTGGCGCA -0.0530540771729  
CTGGCGCC -0.114774024321  
CTGGCGGA -0.034301861026  
CTGGCGGC -0.0930605142447  
CTGGCGTA -0.130781747127  
CTGGCGTC -0.344377265124  
CTGGCTAA -0.313923314516  
CTGGCTAC -0.181629735721  
CTGGCTCA -0.217992737836  
CTGGCTCC -0.288255044278  
CTGGCTGA -0.0852344197099  
CTGGCTGC -0.0391646771494  
CTGGCTTA -0.133509491118  
CTGGCTTC -0.196108927944  
CTGGGAAA 0.113642818334  
CTGGGAAC -0.290265777997

CTGGGAAG -0.234444279819  
CTGGGACA -0.203743654657  
CTGGGACC -0.266654566048  
CTGGGAGA -0.115421711948  
CTGGGAGC -0.132618736383  
CTGGGATA 0.183608153066  
CTGGGATC 0.090449348423  
CTGGGCAA -0.0940302149204  
CTGGGCAC -0.291059104923  
CTGGGCCA -0.290591114623  
CTGGGCCC -0.213175551496  
CTGGGCGA -0.123131445171  
CTGGGCGC -0.235519233618  
CTGGGCTA -0.0902966438901  
CTGGGCTC -0.353439101193  
CTGGGGAA 0.0274857436678  
CTGGGGAC -0.274772158296  
CTGGGGCA -0.0482681417095  
CTGGGGCC -0.252324758472  
CTGGGGGA 0.0255370927442  
CTGGGGGC -0.296313074993  
CTGGGGTA -0.0841157877612  
CTGGGGTC -0.220521604938  
CTGGGTAA 0.164334013919  
CTGGGTAC -0.0217891890557  
CTGGGTCA -0.219337026203  
CTGGGTCC -0.121710237499  
CTGGGTGA -0.206901960784  
CTGGGTGC -0.195673525377  
CTGGGTTA -0.0713538564351  
CTGGGTTC -0.0101506544826  
CTGGTAAA -0.11272382656  
CTGGTAAC 0.00927416308813  
CTGGTAAG -0.0610092160507  
CTGGTACA -0.193990420226  
CTGGTACC -0.168339697087  
CTGGTAGA 0.0904435372568  
CTGGTAGC -0.292329613953  
CTGGTATA -0.0373389097455  
CTGGTATC 0.0138350953463  
CTGGTCAA -0.161647767716  
CTGGTCAC -0.238602432875  
CTGGTCCA -0.190103901913  
CTGGTCCC 0.00471698113208  
CTGGTCGA -0.10365370033  
CTGGTCGC -0.193909517853  
CTGGTCTA -0.112856053248  
CTGGTCTC 0.016060610463  
CTGGTGAA 0.0522363279106  
CTGGTGAC -0.161539578794  
CTGGTGCA -0.19977692835  
CTGGTGCC -0.0433854762887  
CTGGTGGA -0.119782135076  
CTGGTGGC -0.197730578195

CTGGTGTA -0.0474751964529  
CTGGTGTC -0.146721842473  
CTGGTTAA -0.0282729448951  
CTGGTTAC 0.117371950015  
CTGGTTCA -0.0765254041951  
CTGGTTCC -0.173647462277  
CTGGTTGA -0.0467107518697  
CTGGTTGC -0.223693843401  
CTGGTTTA -0.00646637513983  
CTGGTTTC -0.0446535392451  
CTGTAAAA 0.011489237929  
CTGTAAAC 0.173406660959  
CTGTAAAG -0.0411411856389  
CTGTAACA -0.102645790115  
CTGTAACC 0.00545523222873  
CTGTAAGA 0.23250784869  
CTGTAAGC 0.000630355846042  
CTGTAATA 0.184265126086  
CTGTAATC 0.451462634594  
CTGTACAA -0.0280025569131  
CTGTACAC -0.20063161245  
CTGTACAG -0.0498422231499  
CTGTACCA -0.199814687874  
CTGTACCC 0.0494709194554  
CTGTACGA -0.0936939161933  
CTGTACGC -0.146259635258  
CTGTACTA -0.0790071681699  
CTGTACTC -0.14236831418  
CTGTAGAA 0.0756136248875  
CTGTAGAC 0.0480022983903  
CTGTAGCA 0.00375837171124  
CTGTAGCC -0.203349435177  
CTGTAGGA -0.030819380649  
CTGTAGGC -0.114575778608  
CTGTAGTA -0.0233311494504  
CTGTAGTC -0.0310475358521  
CTGTATAA 0.0212600715713  
CTGTATAC 0.111702030851  
CTGTATCA 0.032326064533  
CTGTATCC 0.0105923031104  
CTGTATGA 0.014232998707  
CTGTATGC -0.0332953809921  
CTGTATTA 0.00597533159967  
CTGTATTC -0.11141298382  
CTGTCAA -0.0154417212674  
CTGTCAAC -0.0855628177197  
CTGTCAAG 0.0117298507346  
CTGTCACA -0.0380458781695  
CTGTCACC -0.156401332818  
CTGTCAGA -0.0412975951354  
CTGTCAGC -0.159689984691  
CTGTCATA -0.219777777778  
CTGTCATC -0.014764037991  
CTGTCCAA -0.263602142417

CTGTCCAC -0.172483140457  
CTGTCCCA -0.0439949729439  
CTGTCCCC -0.0674005688008  
CTGTCCGA -0.0625531681348  
CTGTCCGC -0.195075383501  
CTGTCCTA -0.0404093966557  
CTGTCCTC -0.218619559818  
CTGTGCGAA 0.027401101216  
CTGTGCGAC -0.193962794784  
CTGTGCGA 0.0118504205832  
CTGTGCGC -0.175304227079  
CTGTGCGA 0.00821658308686  
CTGTGCGC -0.182743432254  
CTGTGCGTA 0.0432264474911  
CTGTGCGTC -0.116755603266  
CTGTCTAA -0.10450004939  
CTGTCTAC -0.080985702917  
CTGTCTCA -0.132735713933  
CTGTCTCC -0.155741038206  
CTGTCTGA -0.103059555592  
CTGTCTGC -0.185571532317  
CTGTCTTA 0.0588075479154  
CTGTCTTC -0.057484254073  
CTGTGAAA 0.0275253024216  
CTGTGAAC -0.0132522119037  
CTGTGAAG 0.153934499111  
CTGTGACA -0.121343079633  
CTGTGACC 0.0122456413296  
CTGTGAGA -0.0904890469292  
CTGTGAGC -0.260769855378  
CTGTGATA 0.128701348415  
CTGTGATC 0.144152451206  
CTGTGCAA 0.152198799994  
CTGTGCAC 0.0292914769758  
CTGTGCCA -0.0214462499245  
CTGTGCCC -0.1211111111111  
CTGTGCGA 0.0863040847575  
CTGTGCGC -0.102217282731  
CTGTGCTA -0.0827240993216  
CTGTGCTC -0.19233405955  
CTGTGGAA -0.14667224715  
CTGTGGAC -0.157760348584  
CTGTGGCA -0.238690544774  
CTGTGGCC -0.164144773146  
CTGTGGGA -0.0153617529394  
CTGTGGGC -0.248355038593  
CTGTGGTA -0.154745477627  
CTGTGGTC -0.175331880901  
CTGTGTAA 0.163343322576  
CTGTGTAC -0.0118039312539  
CTGTGTCA -0.1398684095  
CTGTGTCC -0.191701925663  
CTGTGTGA 0.0742797785946  
CTGTGTGC -0.15408929277

CTGTGTTA -0.0231508924455  
CTGTGTTC -0.102079628532  
CTGTTAAA 0.0936399067124  
CTGTTAAC -0.190264405581  
CTGTTAAG -0.0784649498342  
CTGTTACA -0.172650205761  
CTGTTACC -0.168883262191  
CTGTTAGA -0.0196586858184  
CTGTTAGC 0.000538985660948  
CTGTTATA 0.217493578979  
CTGTTATC -0.121398465541  
CTGTTCAA -0.0732476119646  
CTGTTCAC -0.206925148213  
CTGTTCCA -0.1816621388  
CTGTTCCC -0.197445789853  
CTGTTCGA 0.145632182238  
CTGTTCGC 0.0988158154697  
CTGTTCTA -0.118839052449  
CTGTTCTC -0.100977922655  
CTGTTGAA 0.048379217985  
CTGTTGAC -0.262699016607  
CTGTTGCA -0.0923548004741  
CTGTTGCC -0.187244114138  
CTGTTGGA -0.0718158441445  
CTGTTGGC -0.137060275962  
CTGTTGTA -0.0736594237636  
CTGTTGTC -0.0336972880627  
CTGTTTAA -0.0077114174887  
CTGTTTAC -0.154352569299  
CTGTTTCA -0.0889294984717  
CTGTTTCC -0.272222222222  
CTGTTTGA -0.176577110497  
CTGTTTGC -0.033422239784  
CTGTTTTA 0.0605668792585  
CTGTTTTTC 0.037843860458  
CTTAAAAA 0.0747462461721  
CTTAAAAC -0.0709354524719  
CTTAAAAG 0.039190991258  
CTTAAACA -0.0515749522492  
CTTAAACC -0.0810006805857  
CTTAAAGA 0.116213153575  
CTTAAAGC -0.0717276998397  
CTTAAATA 0.118482413958  
CTTAAATC 0.054155963907  
CTTAAACA -0.0150716810468  
CTTAAACAC 0.0459893840482  
CTTAAACCA 0.0369958725768  
CTTAAACCC 0.0313206656568  
CTTAAACGA -0.0728684895531  
CTTAAACGC -0.055396732704  
CTTAAACTA 0.0723214156001  
CTTAAACTC -0.022665000799  
CTTAAAGAA 0.16538385535  
CTTAAAGAC -0.175233516634

CTTAAGCA 0.0380894750708  
CTTAAGCC -0.345405022876  
CTTAAGGA -0.00654724664406  
CTTAAGGC -0.12166960263  
CTTAAGTA -0.100907085473  
CTTAAGTC -0.0165788303689  
CTTAATAA 0.109489231377  
CTTAATAC 0.0178998445513  
CTTAATCA 0.0300422762338  
CTTAATCC -0.0321069068476  
CTTAATGA -0.115438440515  
CTTAATGC -0.0263815409109  
CTTAATTA 0.0395514277245  
CTTAATTC 0.052816466637  
CTTACAAA 0.00397629044208  
CTTACAAC -0.14488380645  
CTTACAAG -0.0786090973806  
CTTACACA 0.0246146470443  
CTTACACC 0.0961123298418  
CTTACAGA 0.32691441605  
CTTACAGC -0.0702854884916  
CTTACATA 0.121476322202  
CTTACATC 0.0664674208368  
CTTACCAA -0.0533327910382  
CTTACCAC 0.0882411052838  
CTTACCCA -0.118119169434  
CTTACCCC -0.123823841747  
CTTACCGA 0.0965278282219  
CTTACCGC 0.0728893938645  
CTTACCTA -0.00216677366784  
CTTACCTC -0.0855607048945  
CTTACGAA 0.100360292302  
CTTACGAC -0.0804412725068  
CTTACGCA -0.0660903926896  
CTTACGCC -0.251478249062  
CTTACGGA 0.034583635206  
CTTACGGC -0.137497804996  
CTTACGTA 0.0442106303102  
CTTACGTC -0.106753812636  
CTTACTAA 0.0506196155914  
CTTACTAC -0.0574654921654  
CTTACTCA -0.0022009791815  
CTTACTCC -0.219821673525  
CTTACTGA 0.11465399899  
CTTACTGC -0.00231618696349  
CTTACTTA 0.169934479102  
CTTACTTC 0.0991206836931  
CTTAGAAA 0.0117025325466  
CTTAGAAC -0.00289768782971  
CTTAGAAG -0.0884096118815  
CTTAGACA -0.170062454611  
CTTAGACC -0.180346061775  
CTTAGAGA -0.0543026654503  
CTTAGAGC -0.194259268404



CTTAGATA 0.286044484477  
CTTAGATC 0.206129662561  
CTTAGCAA 0.0456714076097  
CTTAGCAC -0.0239268366375  
CTTAGCCA -0.311669108247  
CTTAGCCC -0.14973116796  
CTTAGCGA 0.0862536864585  
CTTAGCGC -0.221426289034  
CTTAGCTA -0.0138592417912  
CTTAGCTC -0.198067878443  
CTTAGGAA 0.0683631912885  
CTTAGGAC -0.0470294800392  
CTTAGGCA -0.12556021285  
CTTAGGCC -0.247283414008  
CTTAGGGA 0.0234169823599  
CTTAGGGC 0.00108923400074  
CTTAGGTA -0.114244789094  
CTTAGGTC -0.174582791415  
CTTAGTAA -0.050381357779  
CTTAGTAC -0.00591474859231  
CTTAGTCA -0.0404846189731  
CTTAGTCC -0.225890079502  
CTTAGTGA -0.139592338543  
CTTAGTGC -0.192475702848  
CTTAGTTA 0.109216509523  
CTTAGTTC 0.0128964304912  
CTTATAAA 0.0462391262589  
CTTATAAC 0.0659604229662  
CTTATAAG -0.0718609588703  
CTTATACA 0.158073888978  
CTTATACC 0.0401143468055  
CTTATAGA 0.0212298843004  
CTTATAGC 0.0516229774529  
CTTATATA 0.0676816157372  
CTTATATC 0.146596858639  
CTTATCAA 0.0241174987065  
CTTATCAC -0.0900072621641  
CTTATCCA 0.0625198941903  
CTTATCCC -0.083471913504  
CTTATCGA -0.0279424356188  
CTTATCGC -0.044080604534  
CTTATCTA 0.18738611166  
CTTATCTC 0.0164795055874  
CTTATGAA 0.192781078843  
CTTATGAC -0.0870350247511  
CTTATGCA 0.0716531314922  
CTTATGCC -0.115860301744  
CTTATGGA -0.120456341367  
CTTATGGC -0.137752749786  
CTTATGTA -0.079194459293  
CTTATGTC -0.103817849558  
CTTATTAA 0.0204606140654  
CTTATTAC 0.201277744846  
CTTATTCA 0.000745282059477

CTTATTCC 0.137920764749  
CTTATTGA -0.207470121981  
CTTATTGC -0.0819915044947  
CTTATTTA 0.15863685262  
CTTATTTTC 0.100293090957  
CTTCAAAA 0.0988493891012  
CTTCAAAC -0.0535137983271  
CTTCAAAG -0.0270262809989  
CTTCAACA -0.100264936831  
CTTCAACC -0.0243679216229  
CTTCAAGA -0.0495812202244  
CTTCAAGC -0.199046176474  
CTTCAATA 0.214264960121  
CTTCAATC -0.070509207338  
CTTCACAA 0.0828863798804  
CTTCACAC -0.0838802553174  
CTTCACCA -0.0450641067861  
CTTCACCC -0.114337127869  
CTTCACGA -0.127511982571  
CTTCACGC -0.0746908038664  
CTTCACTA -0.13862962963  
CTTCACTC -0.153104954428  
CTTCAGAA -0.0603415466053  
CTTCAGAC -0.244861303212  
CTTCAGCA 0.0217268770592  
CTTCAGCC -0.251099491649  
CTTCAGGA -0.024600356788  
CTTCAGGC -0.228375523314  
CTTCAGTA -0.0202725229675  
CTTCAGTC -0.111408551766  
CTTCATAA 0.0639421282575  
CTTCATAC -0.126736383442  
CTTCATCA -0.204145903357  
CTTCATCC -0.218037582184  
CTTCATGA -0.107470003535  
CTTCATGC 0.05099498392  
CTTCATTA -0.0706655161694  
CTTCATTC -0.164714460622  
CTTCCAAA -0.0711546840959  
CTTCCAAC -0.0948439457827  
CTTCCAAG -0.197486047316  
CTTCCACA -0.0837173355957  
CTTCCACC -0.243016629976  
CTTCCAGA -0.052021773366  
CTTCCAGC -0.135093900578  
CTTCCATA 0.0991137971612  
CTTCCATC -0.178232302254  
CTTCCCAA -0.144316572821  
CTTCCCAC -0.169128177717  
CTTCCCCA -0.268409584712  
CTTCCCCC -0.282708461619  
CTTCCCGA 0.0653305827147  
CTTCCCGC -0.253235460316  
CTTCCCTA -0.0457810112092

CTTCCCTC -0.113694793933  
CTTCCGAA -0.0768350700446  
CTTCCGAC -0.130601785548  
CTTCCGCA -0.0350282113768  
CTTCCGCC -0.270329146867  
CTTCCGGA -0.024319103516  
CTTCCGGC -0.17300308642  
CTTCCGTA -0.118374548608  
CTTCCGTC 0.0505450877106  
CTTCCTAA -0.0176019232036  
CTTCCTAC -0.0516586533184  
CTTCCTCA -0.104413580247  
CTTCCTCC -0.187971835813  
CTTCCTGA 0.0344639279932  
CTTCCTGC -0.209886298784  
CTTCCTTA -0.136869950232  
CTTCCTTC -0.216496570645  
CTTCGAAA -0.0493963651156  
CTTCGAAC -0.145316926474  
CTTCGAAG 0.1415755002  
CTTCGACA -0.0784398459107  
CTTCGACC -0.286265506054  
CTTCGAGA -0.0334359972688  
CTTCGAGC -0.244202460759  
CTTCGATA 0.120527944445  
CTTCGATC 0.156029770138  
CTTCGCAA 0.122686792672  
CTTCGCAC -0.203849047396  
CTTCGCCA -0.0932553977735  
CTTCGCCC -0.0596574695992  
CTTCGCGA -0.0167809136116  
CTTCGCGC -0.0616753592027  
CTTCGCTA -0.0643740975424  
CTTCGCTC -0.29722394068  
CTTCGGAA -0.0189996077463  
CTTCGGAC -0.193913501589  
CTTCGGCA -0.198753154802  
CTTCGGCC -0.146213271226  
CTTCGGGA -0.0289381546642  
CTTCGGGC -0.199587819919  
CTTCGGTA -0.0328048338767  
CTTCGGTC -0.252705940436  
CTTCGTAA -0.0122725767181  
CTTCGTAC 0.0768156271268  
CTTCGTCA -0.196445842446  
CTTCGTCC -0.248403292181  
CTTCGTGA 0.0652539023908  
CTTCGTGC 0.0286915385206  
CTTCGTTA -0.0142367113965  
CTTCGTTC -0.14222101503  
CTTCTAAA 0.0197130846148  
CTTCTAAC -0.188414850283  
CTTCTACA -0.0682246031562  
CTTCTACC -0.110153587831

CTTCTAGA -0.0829044208447  
CTTCTAGC -0.0624653549573  
CTTCTATA 0.122412127599  
CTTCTATC -0.0844103104438  
CTTCTCAA -0.0328054857409  
CTTCTCAC -0.160865472337  
CTTCTCCA -0.153776356723  
CTTCTCCC -0.283576930674  
CTTCTCGA 0.0462414103493  
CTTCTCGC -0.184147389946  
CTTCTCTA -0.0522378639445  
CTTCTCTC -0.2058097313  
CTTCTGAA -0.105746804739  
CTTCTGAC -0.00872874751666  
CTTCTGCA -0.0103985681994  
CTTCTGCC -0.170140885984  
CTTCTGGA -0.100456790123  
CTTCTGGC -0.129343364502  
CTTCTGTA 0.0652230761408  
CTTCTGTC -0.176692821432  
CTTCTTAA -0.0037404772882  
CTTCTTAC 0.110340970174  
CTTCTTCA -0.013596676013  
CTTCTTCC -0.272106383658  
CTTCTTGA 0.0257739746924  
CTTCTTGC -0.113867871318  
CTTCTTTA -0.124870363969  
CTTCTTTC -0.0570791761336  
CTTGAAAA 0.0497376451733  
CTTGAAAC -0.148558837411  
CTTGAAAG -0.11840247311  
CTTGAACA -0.112167509041  
CTTGAACC -0.214875534267  
CTTGAAGA 0.00818062827225  
CTTGAAGC -0.178826989771  
CTTGAATA -0.198230181049  
CTTGAATC 0.00496999985472  
CTTGACAA -0.0495968503479  
CTTGACAC -0.111725772992  
CTTGACCA -0.115954556681  
CTTGACCC -0.219831517792  
CTTGACGA 0.0620509865262  
CTTGACGC -0.111078508843  
CTTGACTA -0.102110982569  
CTTGACTC -0.264788662848  
CTTGAGAA 0.12229744454  
CTTGAGAC -0.239566529492  
CTTGAGCA -0.11391824997  
CTTGAGCC -0.357261201358  
CTTGAGGA 0.131002571441  
CTTGAGGC -0.206169934641  
CTTGAGTA 0.15874113592  
CTTGAGTC -0.0389629255169  
CTTGATAA 0.186917612192

CTTGATAC 0.18210078534  
CTTGATCA -0.0772707067714  
CTTGATCC -0.158157020938  
CTTGATGA -0.17664489739  
CTTGATGC -0.0756602779424  
CTTGATTA 0.157928823904  
CTTGATTC 0.230661165429  
CTTGCAAA 0.0203148334311  
CTTGCAAC 0.09067307832  
CTTGCAAG -0.0432773241277  
CTTGCAACA 0.0715688695829  
CTTGCAACC -0.283230669266  
CTTGCAAGA 0.115817994276  
CTTGCAAGC -0.202224965706  
CTTGCAATA 0.086286197282  
CTTGCAATC -0.157539578794  
CTTGCCAA -0.0899523240916  
CTTGCCAC -0.209565904489  
CTTGCCCA -0.114943758573  
CTTGCCCC -0.265908479951  
CTTGCCGA 0.0433860571937  
CTTGCCGC -0.13826966666  
CTTGCCTA -0.235448075527  
CTTGCCTC -0.0122630533329  
CTTGCGAA 0.0631978847355  
CTTGCGAC 0.0513105469393  
CTTGCGCA 0.0957217666239  
CTTGCGCC -0.320057613169  
CTTGCGGA 0.0618146794429  
CTTGCGGC -0.227913051591  
CTTGCGTA 0.147363279106  
CTTGCGTC -0.081966673253  
CTTGCTAA -0.162603221472  
CTTGCTAC -0.0451848558695  
CTTGCTCA -0.0885781529208  
CTTGCTCC -0.131952030121  
CTTGCTGA -0.123069105427  
CTTGCTGC -0.247632768296  
CTTGCTTA -0.0867622362587  
CTTGCTTC -0.138293435192  
CTTGAAA 0.0472229889733  
CTTGAAAC -0.0327916090364  
CTTGACA -0.0362542477322  
CTTGACC -0.212220456797  
CTTGAGA 0.14962732442  
CTTGAGC -0.218456895375  
CTTGATA 0.246914997167  
CTTGATC 0.108757427397  
CTTGCAA 0.0297619047619  
CTTGCCAC -0.262445958698  
CTTGCCA -0.164526053408  
CTTGCCC -0.225001234507  
CTTGCGA 0.0768156271268  
CTTGCGC -0.126545541172

CTTGGCTA -0.139313150745  
CTTGGCTC -0.338593974175  
CTTGGGAA -0.0256141676231  
CTTGGGAC -0.142681190995  
CTTGGGCA -0.214955809016  
CTTGGGCC -0.41167178689  
CTTGGGGA 0.0769116775341  
CTTGGGGC -0.11289756044  
CTTGGGTA -0.244035721756  
CTTGGGTC -0.143590756468  
CTTGGTAA 0.11165003107  
CTTGGTAC -0.130171978577  
CTTGGTCA -0.23816309751  
CTTGGTCC -0.230078144289  
CTTGGTGA -0.203322359396  
CTTGGTGC -0.183915041718  
CTTGGTTA 0.0380194954884  
CTTGGTTC -0.00843334815034  
CTTGTA AA 0.057955892522  
CTTGTA AC 0.0635372419243  
CTTGTA CA -0.134393729829  
CTTGTA CC -0.161396750136  
CTTGTA GA -0.145511269159  
CTTGTA GC -0.256257281398  
CTTGTA TA 0.0205836022745  
CTTGTA TC -0.159296061731  
CTTGTA CA 0.0487666951799  
CTTGTA CC -0.186939822603  
CTTGTA CA -0.0645583006019  
CTTGTA CC -0.12959990121  
CTTGTA CGA -0.272013080931  
CTTGTA CGC -0.279538101406  
CTTGTA CTA -0.104611155011  
CTTGTA CTC -0.0166039544986  
CTTGTA GAA 0.0752129574744  
CTTGTA GAC 0.126780759229  
CTTGTA GCA -0.178422075142  
CTTGTA GCC -0.287402311517  
CTTGTA GGA -0.0227938271318  
CTTGTA GGC -0.249358024691  
CTTGTA GTA -0.156128423351  
CTTGTA GTC -0.101025066948  
CTTGTA TAA -0.00299420336176  
CTTGTA TAC -0.0950808478491  
CTTGTA TCA -0.125907223504  
CTTGTA TCC -0.0291706370419  
CTTGTA TGA -0.187256499874  
CTTGTA TGC 0.0918004445542  
CTTGTA TTA 0.0276103031976  
CTTGTA TTC 0.0310387305018  
CTTTA AAA 0.147788124882  
CTTTA AAC -0.00728865515087  
CTTTA AAG 0.0583427978865  
CTTTA ACA -0.0381160317142

CTTTAACC -0.0245131936011  
CTTTAAGA -0.196092141654  
CTTTAAGC 0.158716437243  
CTTTAATA 0.0603031899712  
CTTTAATC 0.0453256432235  
CTTTACAA 0.111758894716  
CTTTACAC 0.113163845529  
CTTTACCA -0.0245202968232  
CTTTACCC -0.0014586027051  
CTTTACGA -0.00861650661747  
CTTTACGC 0.101868289919  
CTTTACTA -0.154020256725  
CTTTACTC -0.278082788671  
CTTTAGAA -0.0686350366566  
CTTTAGAC -0.165351665877  
CTTTAGCA -0.037083690092  
CTTTAGCC -0.00679454460635  
CTTTAGGA -0.0170833757064  
CTTTAGGC -0.152708494537  
CTTTAGTA -0.0123858888611  
CTTTAGTC -0.326692029564  
CTTTATAA 0.050967668133  
CTTTATAC 0.0720378054403  
CTTTATCA 0.0865210001017  
CTTTATCC -0.0045295802802  
CTTTATGA 0.131297488123  
CTTTATGC -0.135167446739  
CTTTATTA 0.236998104608  
CTTTATTC 0.0175964346089  
CTTTCAA 0.0114542518921  
CTTTCAAC 0.00984507992954  
CTTTCACA -0.0498973734181  
CTTTCACC 0.0486124832598  
CTTTCAGA -0.115970541589  
CTTTCAGC -0.0203167703909  
CTTTCATA 0.0189233023777  
CTTTCATC -0.183524691358  
CTTTCCAA -0.260534127886  
CTTTCAC 0.158386013433  
CTTTCCCA -0.21942260039  
CTTTCCCC 0.0553121322621  
CTTTCCGA -0.0300160662872  
CTTTCCGC 0.00927343672824  
CTTTCCTA 0.0323405924484  
CTTTCCTC -0.131391659671  
CTTTCGAA -0.0832297926761  
CTTTCGAC -0.201565509408  
CTTTCGCA -0.064560603199  
CTTTCGCC -0.267221247575  
CTTTCGGA -0.0593689986283  
CTTTCGGC -0.283462525921  
CTTTCGTA 0.104291546206  
CTTTCGTC 0.0259267492151  
CTTTCCTAA -0.036813371995

CTTTCTAC 0.0883046279831  
CTTTCTCA 0.068994379679  
CTTTCTCC -0.0933372459919  
CTTTCTGA 0.0741015170476  
CTTTCTGC -0.167048191196  
CTTTCTTA -0.0591313750027  
CTTTCTTC 0.0345932529882  
CTTTGAAA 0.0825665532205  
CTTTGAAC 0.0533990737459  
CTTTGACA -0.0809639836903  
CTTTGACC -0.167624237236  
CTTTGAGA 0.154377987303  
CTTTGAGC -0.273008123056  
CTTTGATA 0.0725335231648  
CTTTGATC 0.0215015697381  
CTTTGCAA 0.0330783610709  
CTTTGCAC -0.0285105051703  
CTTTGCCA -0.138781893004  
CTTTGCCC -0.202915752619  
CTTTGCGA 0.0233375046653  
CTTTGCGC 0.0615902654284  
CTTTGCTA 0.0751950372641  
CTTTGCTC -0.135587338475  
CTTTGGAA 0.0216464397508  
CTTTGGAC -0.197932128261  
CTTTGGCA -0.0994254576584  
CTTTGGCC -0.0851183732752  
CTTTGGGA 0.0635610826203  
CTTTGGGC -0.155498479809  
CTTTGGTA 0.0521305187919  
CTTTGGTC -0.0702202029181  
CTTTGTAA 0.212373425537  
CTTTGTAC -0.169620915033  
CTTTGTCA -0.134858280185  
CTTTGTCC -0.0118676501559  
CTTTGTGA 0.105349178446  
CTTTGTGC -0.168781684114  
CTTTGTTA -0.106261531533  
CTTTGTTC -0.0451338747403  
CTTTTAAA 0.12034136943  
CTTTTAAC 0.0367873059782  
CTTTTACA 0.0752925420975  
CTTTTACC -0.136509908711  
CTTTTAGA 0.0607093459791  
CTTTTAGC -0.219352112521  
CTTTTATA -0.0341156713599  
CTTTTATC 0.0526070344166  
CTTTTCAA 0.0711097253779  
CTTTTCAC -0.137978052126  
CTTTTCCA -0.0540384520399  
CTTTTCCC -0.025907631514  
CTTTTCGA -0.00429070890689  
CTTTTCGC 0.0195531186195  
CTTTTCTA 0.132286144398



CTTTTCTC -0.0742623450961  
CTTTTGAA 0.056672484577  
CTTTTGAC -0.0760746668423  
CTTTTGCA 0.0969134887703  
CTTTTGCC -0.198465132089  
CTTTTGGA -0.0126029666003  
CTTTTGGC -0.138320556135  
CTTTTGTA 0.0438168236405  
CTTTTGTC -0.201472226338  
CTTTTAA 0.0970653610913  
CTTTTAC 0.154776049941  
CTTTTCA -0.0893191309549  
CTTTTCC -0.127043310781  
CTTTTGA -0.116160618235  
CTTTTGC -0.194020638918  
CTTTTTA -0.102760626767  
CTTTTTC 0.0776095768018  
GAAAAAAA 0.049787331399  
GAAAAAAC -0.106923727046  
GAAAAACA 0.000551576520952  
GAAAAACC 0.0255933170871  
GAAAAAGA -0.0387140632626  
GAAAAAGC -0.0441605044092  
GAAAAATA 0.249618542668  
GAAAAATC 0.405357417287  
GAAAACAA 0.0944532419043  
GAAAACAC 0.00710560341697  
GAAAACCA 0.0198117182166  
GAAAACCC -0.0491970185954  
GAAAACGA -0.0915717139784  
GAAAACGC -0.0787783691308  
GAAAACTA 0.0103569781993  
GAAAACTC -0.261500685871  
GAAAAGAA 0.131259148712  
GAAAAGAC 0.0175366466666  
GAAAAGCA 0.0464936876208  
GAAAAGCC -0.113254407342  
GAAAAGGA 0.0366582889021  
GAAAAGGC -0.186940758129  
GAAAAGTA 0.0944154693243  
GAAAAGTC -0.223716049383  
GAAAATAA 0.0828393598103  
GAAAATAC 0.123397330348  
GAAAATCA 0.421897297416  
GAAAATCC 0.464297006225  
GAAAATGA 0.0328519835781  
GAAAATGC -0.00637162896375  
GAAAATTA 0.20418395574  
GAAAATTC 0.227003036334  
GAAACAAA 0.119452878706  
GAAACAAC -0.0350940745132  
GAAACACA -0.108378248805  
GAAACACC -0.101370786386  
GAAACAGA -0.06508070257

GAAACAGC -0.201292891854  
GAAACATA 0.184290965089  
GAAACATC -0.11173406661  
GAAACCAA 0.0561518457717  
GAAACCAC -0.014078245406  
GAAACCCA -0.0988028997719  
GAAACCCC -0.249237386705  
GAAACCGA -0.130771088172  
GAAACCGC -0.0619543087316  
GAAACCTA -0.124285988227  
GAAACCTC -0.288240522101  
GAAACGAA 0.12517687737  
GAAACGAC -0.156457920519  
GAAACGCA -0.0654652132868  
GAAACGCC -0.161669217855  
GAAACGGA -0.0467856476451  
GAAACGGC -0.0617574437182  
GAAACGTA 0.0908139990993  
GAAACGTC -0.223761231491  
GAAACTAA 0.0851640928043  
GAAACTAC 0.0316984585882  
GAAACTCA -0.131580935006  
GAAACTCC -0.292274348422  
GAAACTGA -0.041131581547  
GAAACTGC -0.00881973601164  
GAAACTTA 0.0404833053443  
GAAACTTC -0.0813558928115  
GAAAGAAA 0.213181177633  
GAAAGAAC 0.0186612219807  
GAAAGACA 0.104372468636  
GAAAGACC -0.0716780118478  
GAAAGAGA -0.0283308878009  
GAAAGAGC -0.144110384895  
GAAAGATA 0.212280446879  
GAAAGATC 0.304268301541  
GAAAGCAA 0.0480087378428  
GAAAGCAC -0.203410312273  
GAAAGCCA -0.198052287582  
GAAAGCCC -0.366751084753  
GAAAGCGA -0.00608106253945  
GAAAGCGC -0.283708332467  
GAAAGCTA -0.0976004471539  
GAAAGCTC -0.264850385147  
GAAAGGAA -0.0936371585525  
GAAAGGAC -0.0107288549388  
GAAAGGCA -0.307084670452  
GAAAGGCC -0.367440874454  
GAAAGGGA -0.204924554184  
GAAAGGGC -0.228674897119  
GAAAGGTA -0.00305440295067  
GAAAGGTC -0.319448559671  
GAAAGTAA 0.182297735098  
GAAAGTAC 0.10693853239  
GAAAGTCA -0.0995845884154

GAAAGTCC -0.25534815839  
GAAAGTGA 0.140790686953  
GAAAGTGC -0.0634211604334  
GAAAGTTA 0.0911801025671  
GAAAGTTC 0.023101149973  
GAAATAAA 0.212556477271  
GAAATAAC 0.0799907791609  
GAAATACA 0.134346897564  
GAAATACC 0.143139191957  
GAAATAGA -0.00432226832642  
GAAATAGC 0.0403640944571  
GAAATATA 0.264322345387  
GAAATATC 0.39839513491  
GAAATCAA 0.392486662715  
GAAATCAC 0.439996803859  
GAAATCCA 0.476819258205  
GAAATCCC 0.467317618295  
GAAATCGA 0.428275681722  
GAAATCGC 0.451612549123  
GAAATCTA 0.487023665974  
GAAATCTC 0.484140705614  
GAAATGAA 0.112488196069  
GAAATGAC -0.176254122296  
GAAATGCA -0.0838391469208  
GAAATGCC -0.157975906259  
GAAATGGA -0.00676743726536  
GAAATGGC -0.21317197662  
GAAATGTA 0.00321906079167  
GAAATGTC -0.0472183802059  
GAAATTAA 0.246537271367  
GAAATTAC 0.301875452809  
GAAATTCA 0.205586291686  
GAAATTCC 0.293994159778  
GAAATTGA -0.0226624075172  
GAAATTGC 0.26367440036  
GAAATTTA 0.131941074775  
GAAATTTTC 0.308202513007  
GAACAAAA 0.113560356224  
GAACAAAC -0.184392939317  
GAACAACA -0.146818144398  
GAACAACC -0.134772933274  
GAACAAGA 0.0624783907932  
GAACAAGC -0.116845236712  
GAACAATA 0.19049265626  
GAACAATC 0.25586535612  
GAACACAA -0.0913852806726  
GAACACAC -0.0775950488864  
GAACACCA -0.183771236665  
GAACACCC -0.204776564978  
GAACACGA 0.025255768513  
GAACACGC -0.131326848057  
GAACACTA -0.254763979666  
GAACACTC -0.0221129400142  
GAACAGAA 0.217839579354

GAACAGAC -0.0261697783924  
GAACAGCA -0.215286009043  
GAACAGCC -0.263207193706  
GAACAGGA 0.115758013816  
GAACAGGC -0.118209845253  
GAACAGTA -0.0589223143569  
GAACAGTC -0.128298274715  
GAACATAA 0.064463544754  
GAACATAC -0.126150247701  
GAACATCA -0.0556695189807  
GAACATCC 0.0457748797998  
GAACATGA 0.00500834266394  
GAACATGC -0.099633333527  
GAACATTA 0.0270999363323  
GAACATTC 0.0196722502288  
GAACCAAA 0.161408592944  
GAACCAAC -0.288633802326  
GAACCACA -0.28776325345  
GAACCACC -0.13611090894  
GAACCAGA 0.0337556582262  
GAACCAGC -0.0963468807289  
GAACCATA -0.0105970673942  
GAACCATC -0.118746981869  
GAACCCAA -0.0977123698791  
GAACCCAC -0.179295988658  
GAACCCCA -0.246279409586  
GAACCCCC -0.251473396549  
GAACCCGA -0.0747895839326  
GAACCCGC -0.222696868432  
GAACCCCTA -0.243421124829  
GAACCCCTC -0.213216120111  
GAACCGAA -0.0132392892944  
GAACCGAC 0.05590487121  
GAACCGCA -0.0652671441508  
GAACCGCC -0.0767755991285  
GAACCGGA -0.203715109118  
GAACCGGC -0.294842249657  
GAACCGTA 0.0888396553978  
GAACCGTC -0.203070442992  
GAACCTAA -0.127009213985  
GAACCTAC -0.217770824436  
GAACCTCA -0.11881771968  
GAACCTCC -0.225982981945  
GAACCTGA -0.112514346316  
GAACCTGC -0.235744188216  
GAACCTTA -0.0869976379943  
GAACCTTC -0.185424759146  
GAACGAAA 0.132498946726  
GAACGAAC -0.0223511978266  
GAACGACA -0.0673296238723  
GAACGACC -0.0616771757682  
GAACGAGA 0.0543956715382  
GAACGAGC -0.335703235575  
GAACGATA 0.162647276742

GAACGATC -0.0493808865178  
GAACGCAA 0.0278518738062  
GAACGCAC -0.179098428525  
GAACGCCA -0.266583256508  
GAACGCCC -0.353938339258  
GAACGCGA 0.150264001405  
GAACGCGC 0.0347071285868  
GAACGCTA -0.137245379516  
GAACGCTC -0.239462599855  
GAACGGAA 0.0123591294571  
GAACGGAC -0.312182903277  
GAACGGCA -0.164947462007  
GAACGGCC -0.227342166253  
GAACGGGA 0.0378661762527  
GAACGGGC -0.308762371892  
GAACGGTA -0.037305064262  
GAACGGTC -0.421680765391  
GAACGTAA 0.118226722648  
GAACGTAC -0.206768175583  
GAACGTCA -0.177439408773  
GAACGTCC -0.296431029826  
GAACGTGA -0.0252502799183  
GAACGTGC -0.0728997510407  
GAACGTTA 0.112093129507  
GAACGTTC -0.0453692522479  
GAACTAAA 0.00382006191135  
GAACTAAC -0.0711157215307  
GAACTACA 0.099038947068  
GAACTACC -0.163868866557  
GAACTAGA 0.128114421862  
GAACTAGC -0.0957244345009  
GAACTATA -0.0412142431682  
GAACTATC 0.0703833613279  
GAACTCAA -0.00567707615628  
GAACTCAC -0.226139917695  
GAACTCCA -0.125826597082  
GAACTCCC -0.268549019608  
GAACTCGA -0.0950682129825  
GAACTCGC -0.0644292981676  
GAACTCTA -0.26573877448  
GAACTCTC -0.0929706928208  
GAACTGAA 0.0333322356144  
GAACTGAC -0.295881917319  
GAACTGCA -0.0435227876897  
GAACTGCC -0.313535743121  
GAACTGGA -0.0594859041997  
GAACTGGC -0.10126780275  
GAACTGTA -0.0119986053201  
GAACTGTC -0.0454767624455  
GAACTTAA 0.0379755867308  
GAACTTAC -0.0495933754774  
GAACTTCA -0.0418239814821  
GAACTTCC -0.280528949014  
GAACTTGA -0.0161942672846

GAAC TTGC -0.0856148464917  
GAAC TTTA 0.0286185405256  
GAAG AAAA 0.0129771458124  
GAAG AAAC 0.00657969287987  
GAAG AACA -0.184417240648  
GAAG AAC C -0.180107571142  
GAAG AAGA 0.207811660105  
GAAG AAG C -0.350120830477  
GAAG AATA 0.21431144945  
GAAG AAT C 0.414740169927  
GAAG ACA A -0.0235892638197  
GAAG ACAC -0.00710415062543  
GAAG ACCA -0.246765432099  
GAAG ACC C -0.313448614362  
GAAG AC GA 0.0908909970508  
GAAG AC GC -0.0800635034991  
GAAG ACTA 0.017327444685  
GAAG ACT C -0.0542959230719  
GAAG AGAA -0.053900989447  
GAAG AGAC -0.0889475503843  
GAAG AGCA -0.121277593955  
GAAG AGCC -0.259979432536  
GAAG AG GA 0.00360051812334  
GAAG AG GC -0.218233787038  
GAAG AG TA -0.0213284325832  
GAAG AG TC -0.203851873803  
GAAG ATAA 0.135828997344  
GAAG ATAC 0.248718413138  
GAAG ATCA 0.326922626925  
GAAG ATCC 0.359985949198  
GAAG ATGA -0.056104333701  
GAAG ATGC -0.00871050781273  
GAAG ATTA 0.32718754086  
GAAG ATTC 0.412181657054  
GAAG CAAA -0.0608631479857  
GAAG CAAC -0.253279917261  
GAAG CACA -0.200255144033  
GAAG CACC -0.244346684405  
GAAG CAGA 0.03649162154  
GAAG CAG C -0.349929425705  
GAAG CATA -0.0139533798766  
GAAG CATC -0.214112243742  
GAAG CCAA -0.0642469998518  
GAAG CCAC -0.223639796659  
GAAG CCCA -0.412268625418  
GAAG CCC C -0.336256647526  
GAAG CCGA -0.0109725309404  
GAAG CCG C -0.234348630569  
GAAG CCTA -0.185658678286  
GAAG CCT C -0.216642250863  
GAAG CGAA 0.162624032078  
GAAG CGAC -0.167187928669  
GAAG CGCA 0.0558235148838  
GAAG CGCC -0.165235292894

GAAGCGGA -0.141751633987  
GAAGCGGC -0.292041782562  
GAAGCGTA 0.134305912314  
GAAGCGTC -0.188063027078  
GAAGCTAA -0.0505312434829  
GAAGCTAC -0.158499314384  
GAAGCTCA -0.409118461834  
GAAGCTCC -0.124720406681  
GAAGCTGA -0.0458602705098  
GAAGCTGC -0.274481729099  
GAAGCTTA -0.0289207211657  
GAAGCTTC -0.0794489433142  
GAAGGAAA -0.17427741467  
GAAGGAAC -0.0557778436409  
GAAGGACA -0.119208809728  
GAAGGACC -0.434976267858  
GAAGGAGA -0.13805708941  
GAAGGAGC -0.284067840911  
GAAGGATA 0.0965813654777  
GAAGGATC 0.216210247992  
GAAGGCAA -0.0736789538093  
GAAGGCAC -0.359142021329  
GAAGGCCA -0.264445102848  
GAAGGCCC -0.371350387482  
GAAGGCCG -0.0693236848298  
GAAGGCCG -0.141561306466  
GAAGGCTA -0.285005083515  
GAAGGCTC -0.352520116503  
GAAGGGAA -0.173276846169  
GAAGGGAC -0.217634436926  
GAAGGGCA -0.31141231593  
GAAGGGCC -0.35115448218  
GAAGGGGA -0.126968772694  
GAAGGGGC -0.3396328116  
GAAGGGTA -0.0163931330422  
GAAGGGTC -0.302528868044  
GAAGGTAA -0.108007617417  
GAAGGTAC -0.185543209877  
GAAGGTCA -0.183481283026  
GAAGGTCC -0.383451222111  
GAAGGTGA -0.116459651549  
GAAGGTGC -0.212308550445  
GAAGGTTA -0.0669808009775  
GAAGTAAA -0.0292403522381  
GAAGTAAC -0.191893004115  
GAAGTACA 0.00142947626546  
GAAGTACC -0.240836601307  
GAAGTAGA 0.0661423316734  
GAAGTAGC -0.085148342377  
GAAGTATA -0.130684095861  
GAAGTATC 0.177791175744  
GAAGTCAA -0.15378655043  
GAAGTCAC -0.223015250545  
GAAGTCCA -0.144560727645

GAAGTCCC -0.146144391218  
GAAGTCGA -0.0299100968188  
GAAGTCGC -0.413122785074  
GAAGTCTA -0.197794807587  
GAAGTCTC -0.258499314129  
GAAGTGAA -0.170493531997  
GAAGTGAC -0.0271686545698  
GAAGTGCA -0.180953238664  
GAAGTGCC -0.258737267681  
GAAGTGGA -0.00152308502931  
GAAGTGGC -0.211921568627  
GAAGTGTA 0.0709180189735  
GAAGTGTC -0.101880202589  
GAAGTTAA 0.101703659795  
GAAGTTAC -0.109253313575  
GAAGTTCA -0.0595780993618  
GAAGTTCC -0.182983573915  
GAAGTTGA 0.0454039663474  
GAAGTTGC -0.00483987967251  
GAAGTTTA -0.0201836328505  
GAATAAAA 0.142360495692  
GAATAAAC 0.0190010605378  
GAATAACA 0.0906265193686  
GAATAACC -0.100174334985  
GAATAAGA 0.184215419929  
GAATAAGC 0.0342941118356  
GAATAATA 0.228708613601  
GAATAATC 0.281302572894  
GAATACAA 0.247686429474  
GAATACAC 0.0830372059913  
GAATACCA 0.0774846367295  
GAATACCC -0.145903312916  
GAATACGA 0.214318645854  
GAATACGC 0.172825534264  
GAATACTA -0.017702264902  
GAATACTC 0.0726854596149  
GAATAGAA 0.130192210586  
GAATAGAC -0.159458014735  
GAATAGCA -0.10127607464  
GAATAGCC -0.178126766205  
GAATAGGA 0.186700037322  
GAATAGGC -0.105478946328  
GAATAGTA 0.0533079760258  
GAATAGTC -0.0400698011326  
GAATATAA 0.17723039821  
GAATATAC 0.237332323432  
GAATATCA 0.343298999027  
GAATATCC 0.447019598158  
GAATATGA 0.318621881946  
GAATATGC 0.172749989104  
GAATATTA 0.230976530769  
GAATATTC 0.351698597669  
GAATCAAA 0.344508112143  
GAATCAAC 0.0415716298868



GAATCACA 0.34757623658  
GAATCACC 0.269967507519  
GAATCAGA 0.367955398597  
GAATCAGC 0.230932330084  
GAATCATA 0.348325429757  
GAATCATC 0.235472811006  
GAATCCAA 0.403130765766  
GAATCCAC 0.437073787282  
GAATCCCA 0.382725197041  
GAATCCCC 0.382541804077  
GAATCCGA 0.46129472782  
GAATCCGC 0.417156475353  
GAATCCTA 0.388334540824  
GAATCCTC 0.411814748952  
GAATCGAA 0.230869677961  
GAATCGAC 0.225452260203  
GAATCGCA 0.36159998128  
GAATCGCC 0.323294059535  
GAATCGGA 0.319019078355  
GAATCGGC 0.255048134976  
GAATCGTA 0.407788864739  
GAATCGTC 0.343489977826  
GAATCTAA 0.437695582061  
GAATCTAC 0.443617160374  
GAATCTCA 0.459260905838  
GAATCTCC 0.433575465256  
GAATCTGA 0.443042039223  
GAATCTGC 0.468290032599  
GAATCTTA 0.429833074252  
GAATGAAA -0.0164353452534  
GAATGAAC -0.209253131842  
GAATGACA -0.0283686603809  
GAATGACC -0.246176765931  
GAATGAGA 0.147593969179  
GAATGAGC -0.164222222222  
GAATGATA 0.170355002305  
GAATGATC -0.0429352499593  
GAATGCAA 0.138946519133  
GAATGCAC -0.226209598945  
GAATGCCA 0.0455929568666  
GAATGCCC -0.144365880087  
GAATGCGA 0.209026193831  
GAATGCGC -0.0356526488893  
GAATGCTA -0.0773771301556  
GAATGCTC -0.270722238681  
GAATGGAA -0.0227666962068  
GAATGGAC -0.176968449931  
GAATGGCA -0.183893972404  
GAATGGCC -0.155245139194  
GAATGGGA -0.109592661872  
GAATGGGC -0.159170890188  
GAATGGTA 0.193522360535  
GAATGGTC -0.176833215057  
GAATGTAA 0.0915552481943

GAATGTAC 0.0142566247338  
GAATGTCA 0.101173855563  
GAATGTCC -0.0283948608585  
GAATGTGA 0.0876483663359  
GAATGTGC 0.178113695466  
GAATGTTA 0.155339326287  
GAATTTAA 0.180446878677  
GAATTAAC -0.0570210103405  
GAATTACA 0.278777621199  
GAATTACC 0.185078378104  
GAATTAGA 0.168961590361  
GAATTAGC -0.0997437402305  
GAATTATA 0.18648177473  
GAATTATC 0.215575378089  
GAATTCAA 0.047496926387  
GAATTCAC 0.0879574743683  
GAATTCCA 0.076181694439  
GAATTCCC 0.240226184988  
GAATTCGA 0.231382128195  
GAATTCGC 0.176112538146  
GAATTCTA 0.223067363117  
GAATTCTC 0.263921820457  
GAATTGAA 0.0892231923641  
GAATTGAC -0.0132509116267  
GAATTGCA -0.0222073714643  
GAATTGCC -0.0632066014848  
GAATTGGA 0.19113482184  
GAATTGGC -0.138552536779  
GAATTGTA 0.103714931344  
GAATTGTC -0.121377527498  
GAATTTAA 0.113664957215  
GAATTTAC 0.237474757747  
GAATTTCA 0.149841379613  
GAATTTCC 0.304221827043  
GAATTTGA 0.256770734967  
GAATTTGC 0.308132727035  
GAATTTTA 0.240526685547  
GACAAAAA 0.132164804672  
GACAAAAC -0.0348388548596  
GACAAACA -0.0675359202708  
GACAAACC -0.00979326776401  
GACAAAGA -0.0957582842153  
GACAAAGC -0.107000726216  
GACAAATA 0.226204000988  
GACAAATC 0.258377522409  
GACAACAA -0.0593399416014  
GACAACAC -0.148190436346  
GACAACCA -0.100173133614  
GACAACCC -0.184436516606  
GACAACGA -0.167769710739  
GACAACGC -0.155187440444  
GACAAC TA -0.147933404036  
GACAAC TC -0.115078903944  
GACAAGAA -0.276364285901

GACAAGAC -0.185055494718  
GACAAGCA -0.250138700485  
GACAAGCC -0.234784636488  
GACAAGGA 0.0372611973908  
GACAAGGC -0.407632170007  
GACAAGTA -0.186855569017  
GACAAGTC -0.315635183174  
GACAATAA -0.0983292897302  
GACAATAC 0.0520757865156  
GACAATCA 0.233912512894  
GACAATCC 0.344612395442  
GACAATGA -0.011502154167  
GACAATGC -0.190346848404  
GACAATTA 0.164195952523  
GACACAAA 0.139632153182  
GACACAAC -0.187017333852  
GACACACA 0.0352311520292  
GACACACC -0.156469361434  
GACACAGA 0.0404083103089  
GACACAGC -0.169108850033  
GACACATA -0.00294188675931  
GACACATC -0.0251042377929  
GACACCAA -0.0683241403913  
GACACCAC -0.13344143195  
GACACCCA -0.242189587666  
GACACCCC -0.306422287475  
GACACCGA -0.11207615362  
GACACCGC -0.298824284565  
GACACCTA -0.0682894515111  
GACACCTC -0.277906721536  
GACACGAA -0.0761742187613  
GACACGAC -0.0852117120825  
GACACGCA -0.129603804776  
GACACGCC -0.203090501313  
GACACGGA 0.0336198096743  
GACACGGC -0.133090248627  
GACACGTA 0.104217436168  
GACACGTC -0.263401662082  
GACACTAA 0.0883253671931  
GACACTAC -0.225632373114  
GACACTCA -0.0607949675301  
GACACTCC -0.109297309757  
GACACTGA -0.0701015501286  
GACACTGC -0.399208857287  
GACACTTA 0.00354545704015  
GACAGAAA -0.0357783814934  
GACAGAAC -0.135752528084  
GACAGACA -0.149992042717  
GACAGACC -0.164195472253  
GACAGAGA -0.038331904755  
GACAGAGC -0.0926748057714  
GACAGATA 0.202419372544  
GACAGATC 0.154229511076  
GACAGCAA 0.107116040113

GACAGCAC -0.134964430392  
GACAGCCA -0.128381597602  
GACAGCCC -0.31481390041  
GACAGCGA -0.206366060846  
GACAGCGC -0.157749462224  
GACAGCTA -0.164758169935  
GACAGCTC -0.154789663446  
GACAGGAA -0.0499561278626  
GACAGGAC -0.178720740037  
GACAGGCA -0.206636969195  
GACAGGCC -0.303126760727  
GACAGGGA -0.00152175523508  
GACAGGGC -0.19771257965  
GACAGGTA 0.0849414915805  
GACAGGTC -0.199382716049  
GACAGTAA 0.029234541646  
GACAGTAC -0.036579838159  
GACAGTCA -0.148002858247  
GACAGTCC -0.290071169208  
GACAGTGA -0.102864182322  
GACAGTGC -0.15807643486  
GACAGTTA 0.0170650283269  
GACATAAA 0.0208301250854  
GACATAAC 0.0540859762033  
GACATACA -0.0683330040177  
GACATACC -0.0202124973932  
GACATAGA 0.120666754484  
GACATAGC -0.178573710966  
GACATATA 0.127870535028  
GACATATC 0.225363106412  
GACATCAA 0.0639504307527  
GACATCAC -0.207643347051  
GACATCCA 0.142931238886  
GACATCCC -0.108221812878  
GACATCGA -0.0133345408242  
GACATCGC -0.164328987225  
GACATCTA 0.0320151671437  
GACATCTC -0.145575523368  
GACATGAA -0.151056905845  
GACATGAC -0.10055193362  
GACATGCA -0.000748187642555  
GACATGCC -0.19234038571  
GACATGGA 0.0256286955385  
GACATGGC -0.112586283032  
GACATGTA -0.115230301434  
GACATGTC -0.19195036018  
GACATTAA -0.183318470838  
GACATTAC 0.144467043424  
GACATTCA -0.0374340795839  
GACATTCC 0.0343956830979  
GACATTGA 0.0029735705217  
GACATTGC -0.0885889964441  
GACATTTA -0.116574467385  
GACCAAAA -0.120373948542

GACCAAAC -0.00529100529101  
GACCAACA -0.138658413451  
GACCAACC -0.157673726807  
GACCAAGA -0.127335974792  
GACCAAGC -0.253718595301  
GACCAATA -0.135681439045  
GACCAATC -0.0243766379416  
GACCACAA 0.0327531852454  
GACCACAC 0.0421019163333  
GACCACCA -0.292947101811  
GACCACCC -0.180085515022  
GACCACGA -0.202929203151  
GACCACGC -0.293340748672  
GACCACTA -0.168136528686  
GACCACTC -0.215033938576  
GACCAGAA -0.0634020498757  
GACCAGAC -0.21823437097  
GACCAGCA -0.241554412273  
GACCAGCC -0.148737835875  
GACCAGGA -0.0734328106706  
GACCAGGC -0.275010012234  
GACCAGTA -0.252525780683  
GACCAGTC -0.163587052839  
GACCATAA 0.0662342190519  
GACCATAC 0.104326413203  
GACCATCA -0.227964334705  
GACCATCC -0.167185720594  
GACCATGA -0.139822088456  
GACCATGC -0.268600537875  
GACCATTA 0.0585053680647  
GACCCAAA -0.0155535246752  
GACCCAAC -0.376657905818  
GACCCACA -0.177514835869  
GACCCACC -0.0374557349237  
GACCCAGA 0.026345254561  
GACCCAGC -0.316709551657  
GACCCATA -0.100187091826  
GACCCATC -0.238131891113  
GACCCCAA -0.128854030501  
GACCCCAC -0.369123863616  
GACCCCCA -0.241315904139  
GACCCCCC -0.407919423324  
GACCCCGA -0.0966302862693  
GACCCCGC -0.277506993119  
GACCCCTA -0.275108235798  
GACCCCTC -0.263811360428  
GACCCGAA -0.342787846862  
GACCCGAC -0.300685220845  
GACCCGCA -0.244060290124  
GACCCGCC -0.179534444828  
GACCCGGA -0.0412798991281  
GACCCGGC -0.356948703652  
GACCCGTA -0.284953701014  
GACCCGTC -0.400923137681

GACCCTAA -0.200381930726  
GACCCTAC -0.135103530225  
GACCCTCA -0.220913580247  
GACCCTCC -0.254069840053  
GACCCTGA -0.256709237133  
GACCCTGC -0.22326539859  
GACCCTTA -0.313221570661  
GACCGAAA 0.122303255706  
GACCGAAC -0.17320810189  
GACCGACA -0.0609880818869  
GACCGACC -0.415377288356  
GACCGAGA -0.0961547400469  
GACCGAGC -0.124100536555  
GACCGATA 0.018334217286  
GACCGATC -0.0216393910457  
GACCGCAA 0.114173444412  
GACCGCAC -0.279570048618  
GACCGCCA -0.140015804811  
GACCGCCC -0.31929184057  
GACCGCGA -0.169506937504  
GACCGCGC -0.192877450658  
GACCGCTA -0.328913798496  
GACCGCTC -0.115803830545  
GACCGGAA -0.00740813907546  
GACCGGAC -0.29613362382  
GACCGGCA -0.0846817660134  
GACCGGCC -0.291043302227  
GACCGGGA -0.235111025626  
GACCGGGC -0.262963221135  
GACCGGTA -0.106375963248  
GACCGGTC -0.0107835876166  
GACCGTAA -0.0129001516639  
GACCGTAC -0.00362384465082  
GACCGTCA -0.314220696426  
GACCGTCC -0.214159520243  
GACCGTGA -0.101290078887  
GACCGTGC -0.0963937684132  
GACCGTTA -0.0559658280094  
GACCTAAA 0.0574796972382  
GACCTAAC -0.159178588872  
GACCTACA -0.315020218926  
GACCTACC -0.20353789481  
GACCTAGA -0.0913236238339  
GACCTAGC -0.149476388066  
GACCTATA -0.04176339837  
GACCTATC -0.0417482974158  
GACCTCAA -0.0605073148054  
GACCTCAC -0.0706814952978  
GACCTCCA -0.157798642199  
GACCTCCC -0.238502677966  
GACCTCGA 0.0442023974182  
GACCTCGC -0.29633835267  
GACCTCTA -0.227160015699  
GACCTCTC -0.267229836684

GACCTGAA -0.0750115237719  
GACCTGAC -0.18765155197  
GACCTGCA -0.155952640938  
GACCTGCC -0.311413848432  
GACCTGGA 0.0349403938616  
GACCTGGC -0.435106108725  
GACCTGTA -0.126045854928  
GACCTTAA -0.14772416919  
GACCTTAC -0.242105624143  
GACCTTCA -0.334613831706  
GACCTTCC -0.292035971756  
GACCTTGA -0.0192328800202  
GACCTTGC -0.103949264415  
GACCTTTA -0.154661958615  
GACGAAAA 0.0507722452743  
GACGAAAC -0.119367886112  
GACGAACA -0.100145440575  
GACGAACC -0.161228543834  
GACGAAGA 0.0495338452465  
GACGAAGC -0.277515074764  
GACGAATA 0.155139250069  
GACGAATC 0.266475382447  
GACGACAA -0.0268117373907  
GACGACAC -0.298220927553  
GACGACCA -0.0832441612889  
GACGACCC -0.286776686678  
GACGACGA -0.138730984962  
GACGACGC -0.0661027487006  
GACGACTA -0.0942460807392  
GACGACTC -0.235888074679  
GACGAGAA -0.0393148038376  
GACGAGAC -0.165521068167  
GACGAGCA -0.216234352895  
GACGAGCC -0.364644317443  
GACGAGGA -0.0164176589694  
GACGAGGC -0.146715301908  
GACGAGTA -0.119728909099  
GACGAGTC -0.196365673407  
GACGATAA -0.0416936643761  
GACGATAC 0.19869536104  
GACGATCA 0.0636656836111  
GACGATCC 0.246907176886  
GACGATGA -0.152419992098  
GACGATGC -0.0842226838871  
GACGATTA 0.18239361934  
GACGCAA 0.0849305143911  
GACGCAAC -0.0184548109192  
GACGCACA -0.131049681466  
GACGCACC -0.202725097678  
GACGCAGA -0.198940066867  
GACGCAGC -0.319914196525  
GACGCATA 0.0635918329143  
GACGCATC -0.215859768109  
GACGCCAA -0.166013396373

GACGCCAC -0.3640480927  
GACGCCCA -0.198942971589  
GACGCCCC -0.380431562315  
GACGCCGA -0.229509276178  
GACGCCGC -0.266498200097  
GACGCCTA -0.287445829606  
GACGCCTC -0.161173565723  
GACGCGAA 0.0202682148735  
GACGCGAC -0.147863712191  
GACGCGCA -0.105156574138  
GACGCGCC -0.326517928194  
GACGCGGA -0.114241581203  
GACGCGGC -0.266927885118  
GACGCGTA -0.0544633791608  
GACGCGTC -0.112850807103  
GACGCTAA -0.205012840774  
GACGCTAC -0.159257806826  
GACGCTCA -0.192327950883  
GACGCTCC -0.237928525016  
GACGCTGA -0.0176964537359  
GACGCTGC -0.115655675081  
GACGCTTA -0.253827160494  
GACGGAAA -0.0350864195605  
GACGGAAC -0.186126528968  
GACGGACA -0.224335141918  
GACGGACC -0.384418554903  
GACGGAGA -0.0296209356915  
GACGGAGC -0.129036147028  
GACGGATA 0.219799007662  
GACGGATC 0.0812135730515  
GACGGCAA -0.194301842829  
GACGGCAC -0.191339127  
GACGGCCA -0.328473004845  
GACGGCCC -0.202814971939  
GACGGCGA -0.0725256815488  
GACGGCGC -0.0873492663399  
GACGGCTA -0.207849108368  
GACGGCTC -0.195294142112  
GACGGGAA 0.0157232704403  
GACGGGAC -0.358567345564  
GACGGGCA -0.14617904649  
GACGGGCC -0.233557179538  
GACGGGGA 0.0190097477442  
GACGGGGC -0.178896955529  
GACGGGTA -0.240561036207  
GACGGTAA -0.0179114668836  
GACGGTAC -0.267589844272  
GACGGTCA -0.229733576144  
GACGGTCC -0.379825759695  
GACGGTGA -0.00551878197106  
GACGGTGC -0.229339143065  
GACGGTTA -0.0786483844466  
GACGTAAA 0.117075595179  
GACGTAAC -0.0676296159556



GACGTACA -0.00911917248994  
GACGTACC -0.103728167656  
GACGTAGA -0.011451952842  
GACGTAGC 0.0677276887539  
GACGTATA -0.0371173710284  
GACGTATC 0.216078043961  
GACGTCAA 0.0198110825704  
GACGTCCAC -0.0985962255039  
GACGTCCA -0.237634749524  
GACGTCCC -0.354072720889  
GACGTCCGA -0.0469855382673  
GACGTCCG -0.128899754696  
GACGTCTA 0.0343421370392  
GACGTCTC -0.151216581062  
GACGTGAA 0.127309575349  
GACGTGAC -0.289378310566  
GACGTGCA -0.04430287798  
GACGTGCC -0.363399531828  
GACGTGGA -0.060007554516  
GACGTGGC -0.370077833177  
GACGTGTA -0.0469983903865  
GACGTTAA -0.0882034988366  
GACGTTAC 0.048515973443  
GACGTTCA -0.190629475088  
GACGTTCC -0.259756968849  
GACGTTGA -0.118180180651  
GACGTTGC -0.258092133426  
GACGTTTA -0.221220241035  
GACTAAAA 0.116687523327  
GACTAAAC -0.0379392298261  
GACTAACA -0.204463648834  
GACTAACC -0.184327346755  
GACTAAGA 0.187564490988  
GACTAAGC -0.105294924554  
GACTAATA -0.00444301740982  
GACTAATC -0.0731233565296  
GACTACAA -0.221740128292  
GACTACAC -0.273891607692  
GACTACCA -0.056930448528  
GACTACCC -0.170337811142  
GACTACGA 0.0107329469363  
GACTACGC -0.159941722639  
GACTACTA -0.0407987447881  
GACTACTC 0.0747770368541  
GACTAGAA 0.00839277672047  
GACTAGAC -0.338957475995  
GACTAGCA -0.22550617284  
GACTAGCC -0.208401927214  
GACTAGGA 0.121636589126  
GACTAGGC -0.143089128584  
GACTAGTA -0.013379549192  
GACTAGTC -0.249107128162  
GACTATAA -0.0175936903115  
GACTATAC -0.156210054152

GACTATCA -0.0349369422767  
GACTATCC -0.162177217969  
GACTATGA -0.0127225625151  
GACTATGC -0.263396530726  
GACTATTA -0.0595826497529  
GACTCAAA 0.00785814943414  
GACTCAAC -0.116804122014  
GACTCACA -0.22862745098  
GACTCACC -0.232931098819  
GACTCAGA 0.0212024413269  
GACTCAGC -0.155918315826  
GACTCATA -0.0753499832623  
GACTCATC -0.207343500363  
GACTCCAA -0.125188834918  
GACTCCAC -0.271611338787  
GACTCCCA -0.0317126455481  
GACTCCCC -0.233427695211  
GACTCCGA 0.154880653175  
GACTCCGC -0.102714805486  
GACTCCTA -0.0932248936714  
GACTCCTC -0.318696669939  
GACTCGAA -0.20291953629  
GACTCGAC -0.267178045103  
GACTCGCA -0.146838021029  
GACTCGCC -0.0242764002766  
GACTCGGA -0.172682269273  
GACTCGGC -0.38105485085  
GACTCGTA -0.210628830401  
GACTCTAA -0.225558134303  
GACTCTAC -0.222864197531  
GACTCTCA -0.0899031811895  
GACTCTCC -0.320226907399  
GACTCTGA -0.0662418494369  
GACTCTGC -0.218046728863  
GACTCTTA -0.228359699519  
GACTGAAA 0.0938488806241  
GACTGAAC -0.1202616437  
GACTGACA -0.0158171580975  
GACTGACC -0.347984112093  
GACTGAGA 0.0377136013433  
GACTGAGC -0.169182441701  
GACTGATA 0.0621967551428  
GACTGATC -0.0298301480031  
GACTGCAA 0.0949911084766  
GACTGCAC -0.337647981743  
GACTGCCA -0.0771666627931  
GACTGCCC -0.282897985705  
GACTGCGA -0.0283134543024  
GACTGCGC -0.255387530508  
GACTGCTA -0.157174564808  
GACTGCTC -0.183521801393  
GACTGGAA 0.0439542080107  
GACTGGAC -0.327809079285  
GACTGGCA -0.305452679977

GACTGGCC -0.192247586902  
GACTGGGA -0.0850412366043  
GACTGGGC -0.291670660265  
GACTGGTA -0.0797966594045  
GACTGTAA 0.0422954800963  
GACTGTAC -0.328782117756  
GACTGTCA -0.147506283323  
GACTGTCC -0.0911455760809  
GACTGTGA -0.186077643909  
GACTGTGC -0.179137650022  
GACTGTTA -0.0653113759581  
GACTTAAA -0.0607630061163  
GACTTAAC -0.0628965509671  
GACTTACA -0.163317582623  
GACTTACC -0.00466507505283  
GACTTAGA -0.0944764865689  
GACTTAGC -0.251198902606  
GACTTATA -0.0519686144823  
GACTTATC -0.169383818518  
GACTTCAA -0.267468782233  
GACTTCAC -0.269220323919  
GACTTCCA -0.192833052032  
GACTTCCC -0.346698092657  
GACTTCGA 0.113641712551  
GACTTCGC -0.200868307222  
GACTTCTA -0.133299341369  
GACTTCTC -0.0496713947853  
GACTTGAA -0.0186090803311  
GACTTGAC -0.243083676269  
GACTTGCA -0.0748946189818  
GACTTGCC -0.17535221496  
GACTTGGA 0.111558409484  
GACTTGGC -0.20327384872  
GACTTGTA -0.191567175018  
GACTTTAA -0.0857864928052  
GACTTTAC -0.0198378684643  
GACTTTCA -0.203808278867  
GACTTTCC -0.187271250706  
GACTTTGA -0.26393605494  
GACTTTGC -0.167061786931  
GACTTTTA 0.0824545589252  
GAGAAAAA 0.0915360364941  
GAGAAAAC -0.174107093857  
GAGAAACA -0.0941989043646  
GAGAAACC -0.00872643451058  
GAGAAAGA 0.0626321509732  
GAGAAAGC -0.0232867955777  
GAGAAATA 0.19732831636  
GAGAAATC 0.454191568705  
GAGAACAA 0.0863582874493  
GAGAACAC -0.00588525852425  
GAGAACCA 0.0166097656647  
GAGAACCC -0.271185510729  
GAGAACGA -0.0672457714506

GAGAACGC -0.289435515726  
GAGAACTA 0.0411773270552  
GAGAACTC -0.0925872126804  
GAGAAGAA 0.112964883971  
GAGAAGAC -0.254180636777  
GAGAAGCA -0.0690479326506  
GAGAAGCC -0.347862699275  
GAGAAGGA -0.159667316439  
GAGAAGGC -0.182114771461  
GAGAAGTA -0.0418040765331  
GAGAATAA 0.106735141575  
GAGAATAC 0.11113306549  
GAGAATCA 0.458752342626  
GAGAATCC 0.487875001816  
GAGAATGA -0.0161160323127  
GAGAATGC 0.0396539450554  
GAGAATTA 0.316398274386  
GAGACAAA -0.0303327186107  
GAGACAAC -0.313393126526  
GAGACACA -0.114102772678  
GAGACACC -0.186053372356  
GAGACAGA 0.0614777795534  
GAGACAGC -0.256427424063  
GAGACATA -0.0231620027196  
GAGACATC 0.0281201818952  
GAGACCAA -0.208929707495  
GAGACCAC -0.277128614831  
GAGACCCA -0.113410605113  
GAGACCCC -0.323521828336  
GAGACCGA -0.220935528121  
GAGACCGC -0.255335538986  
GAGACCTA -0.126990952461  
GAGACCTC -0.289467416435  
GAGACGAA -0.0801789081316  
GAGACGAC -0.338610522158  
GAGACGCA -0.0545703860367  
GAGACGCC -0.309516894884  
GAGACGGA -0.2190865746  
GAGACGGC -0.34391887073  
GAGACGTA -0.213224521376  
GAGACTAA -0.0231838240137  
GAGACTAC -0.202994773889  
GAGACTCA -0.0930651194589  
GAGACTCC -0.233454571388  
GAGACTGA -0.142678014838  
GAGACTGC -0.10602209078  
GAGACTTA -0.218737825188  
GAGAGAAA 0.0235897009233  
GAGAGAAC -0.105217524913  
GAGAGACA -0.158112929091  
GAGAGACC -0.245960784314  
GAGAGAGA -0.0574885458703  
GAGAGAGC -0.167062716242  
GAGAGATA 0.165157700522

GAGAGATC 0.308574375663  
GAGAGCAA -0.0321486887751  
GAGAGCAC -0.127754730234  
GAGAGCCA -0.328073315231  
GAGAGCCC -0.377564472993  
GAGAGCGA -0.022005007579  
GAGAGCGC -0.181047300819  
GAGAGCTA -0.182406401264  
GAGAGCTC -0.312227596298  
GAGAGGAA -0.267671457285  
GAGAGGAC -0.167003798584  
GAGAGGCA -0.298483551693  
GAGAGGCC -0.341946436403  
GAGAGGGA -0.0597788205593  
GAGAGGGC -0.270741299038  
GAGAGGTA -0.215572698847  
GAGAGTAA -0.00716810467848  
GAGAGTAC -0.164307063994  
GAGAGTCA -0.13683900149  
GAGAGTCC -0.333443701877  
GAGAGTGA -0.118221585545  
GAGAGTGC -0.117523583741  
GAGAGTTA 0.0193618492542  
GAGATAAA -0.144089464295  
GAGATAAC 0.16707247977  
GAGATACA 0.194431450031  
GAGATACC 0.25794336868  
GAGATAGA -0.0110122537485  
GAGATAGC 0.0741659885028  
GAGATATA 0.310112881903  
GAGATATC 0.456626982167  
GAGATCAA 0.209626196737  
GAGATCAC 0.286447013107  
GAGATCCA 0.359715543417  
GAGATCCC 0.341451048189  
GAGATCGA 0.298445513053  
GAGATCGC 0.412725855672  
GAGATCTA 0.425047578923  
GAGATCTC 0.424300155373  
GAGATGAA -0.071908822803  
GAGATGAC -0.0440580855478  
GAGATGCA -0.0571972690009  
GAGATGCC 0.0292774621992  
GAGATGGA -0.152761919703  
GAGATGGC -0.0423282546424  
GAGATGTA -0.0289441041516  
GAGATTAA 0.140712980342  
GAGATTAC 0.459572769794  
GAGATTCA 0.206340141262  
GAGATTCC 0.461344122732  
GAGATTGA 0.0107400454501  
GAGATTGC 0.472457978005  
GAGATTTA 0.292505309691  
GAGCAAAA -0.0363592960274

GAGCAAAC -0.0623623548007  
GAGCAACA -0.0648767137615  
GAGCAACC -0.216909767512  
GAGCAAGA 0.0999857296538  
GAGCAAGC -0.0616637368704  
GAGCAATA -0.0193966936706  
GAGCAATC 0.378924345211  
GAGCACAA -0.013350943926  
GAGCACAC -0.237536096649  
GAGCACCA -0.124972039287  
GAGCACCC -0.259463117659  
GAGCACGA -0.119573270114  
GAGCACGC -0.328623288367  
GAGCACTA -0.0706129327503  
GAGCACTC -0.0968888230323  
GAGCAGAA -0.0476864294742  
GAGCAGAC -0.149154580602  
GAGCAGCA -0.0230526997702  
GAGCAGCC -0.260803583957  
GAGCAGGA -0.248861566485  
GAGCAGGC -0.371837019182  
GAGCAGTA 0.0531910566153  
GAGCATAA 0.0185013002484  
GAGCATAC -0.08490308411  
GAGCATCA 0.0699246964807  
GAGCATCC -0.268268861454  
GAGCATGA -0.14501797426  
GAGCATGC -0.0726952689836  
GAGCATT A -0.195832921729  
GAGCCAAA -0.100807131111  
GAGCCAAC -0.229246784631  
GAGCCACA -0.134294843863  
GAGCCACC -0.252080932785  
GAGCCAGA -0.0752253783422  
GAGCCAGC -0.312836043628  
GAGCCATA -0.126192987196  
GAGCCATC -0.101691049351  
GAGCCCAA -0.29074704982  
GAGCCCAC -0.344455072822  
GAGCCCCA -0.305102925363  
GAGCCCCC -0.267439627838  
GAGCCCGA -0.0728640182633  
GAGCCCGC -0.379705971091  
GAGCCCTA -0.211771966254  
GAGCCCTC -0.226523742027  
GAGCCGAA -0.145967777339  
GAGCCGAC -0.289731768133  
GAGCCGCA -0.244929581965  
GAGCCGCC -0.309553591512  
GAGCCGGA -0.183707703614  
GAGCCGGC -0.272631255521  
GAGCCGTA -0.163654889892  
GAGCCTAA -0.0577616437003  
GAGCCTAC -0.200513630976

GAGCCTCA -0.145327160494  
GAGCCTCC -0.273073560634  
GAGCCTGA -0.170006128964  
GAGCCTGC -0.180411508407  
GAGCCTTA -0.131047204067  
GAGCGAAA 0.0595833393866  
GAGCGAAC -0.150075178893  
GAGCGACA -0.105595628542  
GAGCGACC -0.150679662118  
GAGCGAGA 0.0794297631788  
GAGCGAGC -0.0901999198784  
GAGCGATA -0.00135836008891  
GAGCGATC 0.298276989235  
GAGCGCAA 0.149944742171  
GAGCGCAC -0.173131592523  
GAGCGCCA -0.0893478576616  
GAGCGCCC -0.386880508807  
GAGCGCGA 0.160566879258  
GAGCGCGC 0.0714567998814  
GAGCGCTA -0.188000636425  
GAGCGCTC -0.1663584749  
GAGCGGAA -0.0137896608742  
GAGCGGAC -0.275261754247  
GAGCGGCA -0.161391430646  
GAGCGGCC -0.390753813497  
GAGCGGGA -0.124865649964  
GAGCGGGC -0.296747353595  
GAGCGGTA 0.0637063617741  
GAGCGTAA 0.165224528932  
GAGCGTAC -0.292117283951  
GAGCGTCA -0.317383910694  
GAGCGTCC -0.20998703118  
GAGCGTGA -0.203662400927  
GAGCGTGC -0.250050835149  
GAGCGTTA 0.0488617378292  
GAGCTAAA -0.0619612491611  
GAGCTAAC -0.159132041379  
GAGCTACA -0.0831837765155  
GAGCTACC -0.240518551435  
GAGCTAGA 0.0375401333663  
GAGCTAGC -0.214698473848  
GAGCTATA -0.112538075245  
GAGCTATC 0.0203517091484  
GAGCTCAA -0.221961183821  
GAGCTCAC -0.28539331391  
GAGCTCCA -0.297890024523  
GAGCTCCC -0.236822739171  
GAGCTCGA 0.138943774836  
GAGCTCGC -0.188240813908  
GAGCTCTA -0.159775034294  
GAGCTGAA -0.227196404761  
GAGCTGAC -0.170463648834  
GAGCTGCA -0.116930615918  
GAGCTGCC -0.189082269289

GAGCTGGA -0.0217320907155  
GAGCTGGC -0.193814845906  
GAGCTGTA -0.0955650837161  
GAGCTTAA -0.0951992887835  
GAGCTTAC -0.147779265788  
GAGCTTCA -0.280677910975  
GAGCTTCC -0.265267353567  
GAGCTTGA -0.15060435973  
GAGCTTGC -0.263359334184  
GAGCTTTA -0.156345169309  
GAGGAAAA 0.142543547426  
GAGGAAAC -0.16899199921  
GAGGAACA -0.207097979185  
GAGGAACC -0.154431372549  
GAGGAAGA -0.0876894750129  
GAGGAAGC -0.261130698947  
GAGGAATA 0.26744000966  
GAGGAATC 0.398946738677  
GAGGACAA -0.0944136457922  
GAGGACAC -0.133268028734  
GAGGACCA -0.150515442956  
GAGGACCC -0.366921057523  
GAGGACGA -0.239407813698  
GAGGACGC -0.200397153972  
GAGGACTA -0.208551440329  
GAGGACTC -0.258196399887  
GAGGAGAA 0.117806805211  
GAGGAGAC -0.277089299233  
GAGGAGCA -0.303984013988  
GAGGAGCC -0.41811376876  
GAGGAGGA 0.0331692567716  
GAGGAGGC -0.241956104252  
GAGGAGTA -0.164657070968  
GAGGATAA 0.23152993477  
GAGGATAC 0.113940987608  
GAGGATCA 0.0671996092121  
GAGGATCC 0.343792656071  
GAGGATGA -0.0503720899602  
GAGGATGC -0.190365650878  
GAGGATTA 0.329942033618  
GAGGCAAA -0.0867115633713  
GAGGCAAC -0.180017226529  
GAGGCACA -0.179816662988  
GAGGCACC -0.293383918186  
GAGGCAGA -0.085837133622  
GAGGCAGC -0.26114777335  
GAGGCATA -0.0957593014978  
GAGGCATC -0.108970225127  
GAGGCCAA -0.179614950024  
GAGGCCAC -0.194570632256  
GAGGCCCA -0.377424357716  
GAGGCCCC -0.362069366109  
GAGGCCGA -0.0659773672714  
GAGGCCGC -0.249470507545



GAGGCCTA -0.14273102188  
GAGGCCTC -0.138648370836  
GAGGCGAA 0.0354699693767  
GAGGCGAC -0.155395376263  
GAGGCGCA -0.208482207698  
GAGGCGCC -0.326289109432  
GAGGCGGA -0.155307189542  
GAGGCGGC -0.152309304712  
GAGGCGTA -0.268094234863  
GAGGCTAA -0.151149359059  
GAGGCTAC -0.264456113244  
GAGGCTCA -0.145375537011  
GAGGCTCC -0.214625889531  
GAGGCTGA -0.0905480910668  
GAGGCTGC -0.253224649362  
GAGGCTTA -0.00448501086527  
GAGGGAAA -0.0332903349516  
GAGGGAAC -0.213407407407  
GAGGGACA -0.245876950425  
GAGGGACC -0.382140948797  
GAGGGAGA -0.0628409586057  
GAGGGAGC -0.220854730397  
GAGGGATA 0.198040184214  
GAGGGATC 0.0913941310147  
GAGGGCAA -0.01392559024  
GAGGGCAC -0.292888551618  
GAGGGCCA -0.211871729041  
GAGGGCCC -0.393246994032  
GAGGGCGA -0.125354428615  
GAGGGCGC -0.220683524299  
GAGGGCTA -0.32056979213  
GAGGGGAA -0.0569411764706  
GAGGGGAC -0.256633089736  
GAGGGGCA -0.182314600737  
GAGGGGCC -0.32209164527  
GAGGGGGA -0.131238305321  
GAGGGGGC -0.351673578199  
GAGGGGTA -0.155588772774  
GAGGGTAA 0.0849054959104  
GAGGGTAC -0.105683640505  
GAGGGTCA -0.104301783265  
GAGGGTCC -0.327619502186  
GAGGGTGA -0.0454904672528  
GAGGGTGC -0.101515251298  
GAGGGTTA -0.272043572985  
GAGGTAAA 0.0693086017256  
GAGGTAAAC -0.0371724156856  
GAGGTACA -0.199034908313  
GAGGTACC -0.0711592914527  
GAGGTAGA 0.082578123865  
GAGGTAGC -0.28150056941  
GAGGTATA -0.0420423465302  
GAGGTATC -0.0431663187015  
GAGGTCAA -0.0785740548668

GAGGTCAC -0.178227858396  
GAGGTCCA -0.0759853558613  
GAGGTCCC -0.316892444269  
GAGGTCGA -0.139148160952  
GAGGTCGC -0.216092451498  
GAGGTCTA -0.237886887977  
GAGGTGAA -0.0241584705011  
GAGGTGAC -0.154852962964  
GAGGTGCA -0.256595191683  
GAGGTGCC -0.177005486968  
GAGGTGGA -0.145873799726  
GAGGTGGC -0.124243682955  
GAGGTGTA 0.0378553891302  
GAGGTTAA -0.140354776406  
GAGGTTAC -0.0501396847351  
GAGGTTCA -0.340938386182  
GAGGTTCC -0.232780080577  
GAGGTTGA -0.210514403292  
GAGGTTGC -0.266119561877  
GAGGTTTA -0.283366807147  
GAGTAAAA 0.21332936237  
GAGTAAAC -0.0477761411277  
GAGTAACA -0.07295343682  
GAGTAACC -0.213850399419  
GAGTAAGA 0.118775877849  
GAGTAAGC -0.000429097105601  
GAGTAATA 0.111819911961  
GAGTAATC 0.365637121729  
GAGTACAA 0.0816338093647  
GAGTACAC 0.0147211366641  
GAGTACCA -0.203735551211  
GAGTACCC -0.166358205833  
GAGTACGA -0.150505150283  
GAGTACGC -0.149438143491  
GAGTACTA -0.208864962162  
GAGTACTC -0.291870517159  
GAGTAGAA 0.0631368674909  
GAGTAGAC -0.147309743691  
GAGTAGCA -0.167330622637  
GAGTAGCC -0.240768066646  
GAGTAGGA 0.1786455246  
GAGTAGGC -0.217029575865  
GAGTAGTA 0.212422820449  
GAGTATAA 0.10767559024  
GAGTATAC 0.0521828141123  
GAGTATCA 0.249407987448  
GAGTATCC 0.305064431305  
GAGTATGA 0.0358418200572  
GAGTATGC -0.134915538872  
GAGTATTA -0.0326818371424  
GAGTCAAA -0.0906672671538  
GAGTCAAC -0.137785790334  
GAGTCACA -0.0633901374825  
GAGTCACC -0.189438175893

GAGTCAGA 0.049570243035  
GAGTCAGC -0.225276172602  
GAGTCATA 0.0270553368297  
GAGTCATC -0.0387829799377  
GAGTCCAA 0.00801701570681  
GAGTCCAC -0.341841520612  
GAGTCCCA -0.163956427015  
GAGTCCCC -0.320356472795  
GAGTCCGA -0.201281882436  
GAGTCCGC -0.238880933963  
GAGTCCTA -0.139135622431  
GAGTCGAA -0.0798703721997  
GAGTCGAC -0.199367318929  
GAGTCGCA -0.112074976178  
GAGTCGCC -0.350475877013  
GAGTCGGA -0.181338673334  
GAGTCGGC 0.0669635996399  
GAGTCGTA -0.103123250683  
GAGTCTAA -0.146524196243  
GAGTCTAC -0.0977733810964  
GAGTCTCA -0.226497600818  
GAGTCTCC -0.185978257397  
GAGTCTGA -0.0745396668588  
GAGTCTGC -0.38603757807  
GAGTCTTA -0.132534351815  
GAGTGAAA 0.0578166331895  
GAGTG AAC 0.108391323929  
GAGTGACA -0.187056034445  
GAGTGACC -0.283753169465  
GAGTGAGA 0.12639842438  
GAGTGAGC -0.155171136465  
GAGTGATA 0.186525358476  
GAGTGATC 0.0935928889767  
GAGTGCAA -0.000852788633359  
GAGTG CAC -0.150099295057  
GAGTGCCA -0.17758186398  
GAGTGCCC -0.214471192388  
GAGTGCGA 0.00593116191505  
GAGTGCGC -0.0988832230344  
GAGTGCTA 0.195927825316  
GAGTG GAA 0.184360699083  
GAGTG GAC -0.265589079277  
GAGTG GCA -0.359307384453  
GAGTG GCC -0.196278102664  
GAGTG GGA 0.0326434169795  
GAGTG GGC -0.234782367174  
GAGTG GTA -0.0425561275478  
GAGTG TAA 0.0562622579286  
GAGTG TAC -0.101077971322  
GAGTG TCA 0.0413455838767  
GAGTG TCC -0.281069958848  
GAGTG TGA -0.109413580247  
GAGTG TGC -0.125047213393  
GAGTG TTA -0.227375249008

GAGTTAAA 0.0900513732464  
GAGTTAAC -0.133562151217  
GAGTTACA 0.118150233814  
GAGTTACC -0.0707706968987  
GAGTTAGA 0.0553305231728  
GAGTTAGC -0.19697985705  
GAGTTATA 0.110335159008  
GAGTTATC 0.0146455915041  
GAGTTCAA -0.0531463005038  
GAGTTCAC -0.191772723707  
GAGTTCCA -0.140030178326  
GAGTTCCC -0.150913770615  
GAGTTCGA -0.258604266194  
GAGTTCGC -0.125410150892  
GAGTTCTA -0.109856507427  
GAGTTGAA -0.108994659802  
GAGTTGAC -0.193511659808  
GAGTTGCA -0.0875422538303  
GAGTTGCC -0.142903002766  
GAGTTGGA 0.0938253598387  
GAGTTGGC -0.124427469136  
GAGTTGTA -0.0013467377566  
GAGTTTAA -0.0553469992591  
GAGTTTAC 0.0405401478942  
GAGTTTCA -0.0891907466864  
GAGTTTCC -0.171416122004  
GAGTTTGA 0.111400432118  
GAGTTTGC 0.0169148518879  
GAGTTTTA -0.0545157236846  
GATAAAAA 0.123973965976  
GATAAAAC 0.0877132319041  
GATAAACA -0.0586815330666  
GATAAACC -0.219969437795  
GATAAAGA 0.170789382685  
GATAAAGC -0.115075837394  
GATAAATA 0.0359502952864  
GATAAATC 0.149002658609  
GATAACAA 0.102760303924  
GATAACAC 0.145521855584  
GATAACCA -0.0123795253463  
GATAACCC -0.000754681771279  
GATAACGA 0.22689552976  
GATAACGC 0.138551340315  
GATAACTA -0.0414618937074  
GATAAGAA -0.122840958606  
GATAAGAC -0.0235021006328  
GATAAGCA 0.0502389842082  
GATAAGCC -0.0356915494967  
GATAAGGA -0.0415413757739  
GATAAGGC -0.0217359087092  
GATAAGTA 0.159166388215  
GATAATAA 0.0410791020448  
GATAATAC 0.0353565876832  
GATAATCA 0.27893587126

GATAATCC 0.345937268461  
GATAATGA 0.0533454139089  
GATAATGC 0.0651678700623  
GATAATTA 0.220987288415  
GATACAAA 0.121265962547  
GATACAAC -0.015127918295  
GATACACA 0.250238984208  
GATACACC 0.176400689367  
GATACAGA 0.060584312757  
GATACAGC 0.00202373861375  
GATACATA 0.194463654526  
GATACATC -0.00882566027794  
GATACCAA 0.0996619025665  
GATACCAC 0.0703935612279  
GATACCCA 0.284960701989  
GATACCCC 0.325808469999  
GATACCGA 0.290431732859  
GATACCGC 0.244077806318  
GATACCTA 0.197285871399  
GATACGAA 0.272908343382  
GATACGAC 0.178758040791  
GATACGCA 0.431187075966  
GATACGCC 0.372947265582  
GATACGGA 0.371144262223  
GATACGGC 0.305317217033  
GATACGTA 0.332833871216  
GATACTAA -0.0380587799457  
GATACTAC 0.164731937035  
GATACTCA 0.325002542385  
GATACTCC 0.31539668473  
GATACTGA 0.13328635974  
GATACTGC 0.278746514742  
GATACTTA 0.177121406698  
GATAGAAA 0.171249643241  
GATAGAAC -0.1081559717  
GATAGACA -0.222743432747  
GATAGACC -0.28293639037  
GATAGAGA 0.0710778260427  
GATAGAGC -0.290608569354  
GATAGATA 0.216601901249  
GATAGATC 0.171593567039  
GATAGCAA 0.065278601067  
GATAGCAC 0.0032905728357  
GATAGCCA 0.0902052794445  
GATAGCCC -0.1395515385  
GATAGCGA 0.14784627544  
GATAGCGC 0.137398735428  
GATAGCTA 0.0694314083881  
GATAGGAA 0.152913573431  
GATAGGAC -0.173725308642  
GATAGGCA -0.125084249425  
GATAGGCC -0.275761416446  
GATAGGGA -0.0231389206873  
GATAGGGC -0.098409138448

GATAGGTA -0.0390678170761  
GATAGTAA 0.0724055412852  
GATAGTAC -0.0814315352697  
GATAGTCA -0.0444164526115  
GATAGTCC -0.239961591221  
GATAGTGA 0.216471772202  
GATAGTGC 0.183008957387  
GATAGTTA 0.0792594833547  
GATATAAA 0.282618802028  
GATATAAC 0.0861752357154  
GATATACA 0.206480903055  
GATATACC 0.211758216426  
GATATAGA 0.253060305377  
GATATAGC 0.184067526916  
GATATATA 0.272396955933  
GATATATC 0.346904009481  
GATATCAA 0.360861080921  
GATATCAC 0.427036506447  
GATATCCA 0.478586247777  
GATATCCC 0.469585327742  
GATATCGA 0.436711014512  
GATATCGC 0.458001273354  
GATATCTA 0.472227710817  
GATATGAA 0.247118487782  
GATATGAC 0.262727596544  
GATATGCA 0.373592608197  
GATATGCC 0.281573141013  
GATATGGA 0.262994247953  
GATATGGC 0.183094030604  
GATATGTA 0.260899568521  
GATATTAA 0.239485421237  
GATATTAC 0.355310679471  
GATATTCA 0.405126896309  
GATATTCC 0.430019031569  
GATATTGA 0.281197172276  
GATATTGC 0.379854504611  
GATATTTA 0.40783490477  
GATCAAAA 0.172127818393  
GATCAAAC 0.00619760870513  
GATCAACA -0.284029560866  
GATCAACC -0.193866641876  
GATCAAGA 0.0892966914751  
GATCAAGC -0.0854732510288  
GATCAATA -0.0562826865983  
GATCAATC 0.0461014511844  
GATCACAA 0.0726799710202  
GATCACAC 0.184601862479  
GATCACCA 0.148268897232  
GATCACCC -0.026134266994  
GATCACGA 0.180705475571  
GATCACGC 0.227171560153  
GATCACTA 0.0390650727788  
GATCAGAA 0.26724245638  
GATCAGAC 0.0418285802103

GATCAGCA 0.0321125041768  
GATCAGCC 0.0346642546676  
GATCAGGA 0.209999564163  
GATCAGGC -0.0105326132297  
GATCAGTA 0.0868367750222  
GATCATAA 0.177207512788  
GATCATAC 0.0472694783026  
GATCATCA -0.0357334957957  
GATCATCC 0.0462496432413  
GATCATGA 0.105968297877  
GATCATGC 0.116769852247  
GATCATTAA 0.226514303278  
GATCCAAA 0.152758567696  
GATCCAAC 0.113317526181  
GATCCACA 0.1705185013  
GATCCACC 0.175600366103  
GATCCAGA 0.230565281188  
GATCCAGC 0.0881279298627  
GATCCATA 0.207494950493  
GATCCATC -0.0299289584937  
GATCCCAA 0.102697095436  
GATCCCAC 0.119461595456  
GATCCCCA 0.362949457382  
GATCCCCC 0.32187322941  
GATCCCGA 0.325284383944  
GATCCCGC 0.302333183212  
GATCCCTA 0.202932556148  
GATCCGAA 0.238257151639  
GATCCGAC 0.178626314518  
GATCCGCA 0.256726272805  
GATCCGCC 0.314202490085  
GATCCGGA 0.243844481771  
GATCCGGC 0.167675096315  
GATCCGTA 0.285483764737  
GATCCTAA 0.209165661819  
GATCCTAC 0.223469847312  
GATCCTCA 0.321569902742  
GATCCTCC 0.287931677973  
GATCCTGA 0.233854835523  
GATCCTGC 0.206832202683  
GATCCTTA 0.191030297673  
GATCGAAA 0.155887066675  
GATCGAAC -0.0170194528787  
GATCGACA -0.0645564062457  
GATCGACC -0.0386075714921  
GATCGAGA 0.158477683374  
GATCGAGC 0.114450219309  
GATCGATA 0.223978572526  
GATCGATC 0.0784070709066  
GATCGCAA 0.30545668502  
GATCGCAC 0.377765025496  
GATCGCCA 0.281075937414  
GATCGCCC 0.360268611825  
GATCGCGA 0.443117438907

GATCGCGC 0.435421194757  
GATCGCTA 0.2235916266  
GATCGGAA 0.172200833902  
GATCGGAC -0.073153231663  
GATCGGCA 0.175237107291  
GATCGGCC -0.0513108497385  
GATCGGGA 0.333366264902  
GATCGGGC 0.146290258842  
GATCGGTA 0.0987041427913  
GATCGTAA 0.281775116545  
GATCGTAC 0.133846137846  
GATCGTCA 0.28824691645  
GATCGTCC 0.192273705241  
GATCGTGA 0.131328349689  
GATCGTGC 0.194737882101  
GATCGTTA 0.161172583372  
GATCTAAA 0.197317071268  
GATCTAAC 0.173540171131  
GATCTACA 0.325040314965  
GATCTACC 0.258409068458  
GATCTAGA 0.321384662671  
GATCTAGC 0.200764561242  
GATCTATA 0.260603964961  
GATCTCAA 0.313632022657  
GATCTCAC 0.351262424698  
GATCTCCA 0.429518211157  
GATCTCCC 0.337320797383  
GATCTCGA 0.341980463682  
GATCTCGC 0.404817618295  
GATCTCTA 0.354019846758  
GATCTGAA 0.257201036247  
GATCTGAC 0.103727863089  
GATCTGCA 0.322847144042  
GATCTGCC 0.293313868082  
GATCTGGA 0.272796878087  
GATCTGGC 0.170168390085  
GATCTGTA 0.326403739699  
GATCTTAA 0.225531844826  
GATCTTAC 0.328059215783  
GATCTTCA 0.420772135502  
GATCTTCC 0.351165777514  
GATCTTGA 0.291939912542  
GATCTTGC 0.304894179894  
GATCTTTA 0.313614582819  
GATGAAAA 0.260353318902  
GATGAAAC -0.161268626579  
GATGAACA -0.112658894817  
GATGAACC -0.214593184696  
GATGAAGA -0.0868146043423  
GATGAAGC -0.168730956021  
GATGAATA 0.0822294538957  
GATGAATC -0.0266253105342  
GATGACAA 0.0854662734444  
GATGACAC -0.0582065467958



GATGACCA -0.27623311988  
GATGACCC -0.158999546886  
GATGACGA -0.163670485974  
GATGACGC -0.152401135278  
GATGACTA -0.000900129530835  
GATGAGAA -0.014866415818  
GATGAGAC -0.269519482444  
GATGAGCA 0.0449315524314  
GATGAGCC -0.279184492639  
GATGAGGA -0.00629267382379  
GATGAGGC -0.244700842927  
GATGAGTA 0.143720308573  
GATGATAA 0.0536181773277  
GATGATAC -0.0543974620738  
GATGATCA -0.00731355243803  
GATGATCC 0.0406679935496  
GATGATGA 0.00466507505283  
GATGATGC 0.0744424912469  
GATGATTA 0.170286394871  
GATGCAAA 0.189641924082  
GATGCAAC -0.0478389725858  
GATGCACA -0.157883956665  
GATGCACC 0.0515871747563  
GATGCAGA 0.0985036247149  
GATGCAGC -0.236943918393  
GATGCATA 0.188254180408  
GATGCATC -0.0721109170815  
GATGCCAA -0.11476853681  
GATGCCAC 0.0142497733981  
GATGCCCA -0.0209461869872  
GATGCCCC -0.130893773497  
GATGCCGA -0.137425609937  
GATGCCGC -0.0851699039705  
GATGCCTA -0.0276995653033  
GATGCGAA 0.140756613833  
GATGCGAC -0.0875495765113  
GATGCGCA 0.231989176491  
GATGCGCC -0.15031872672  
GATGCGGA 0.0907660569785  
GATGCGGC -0.116786318031  
GATGCGTA 0.0702306856353  
GATGCTAA 0.0287144247672  
GATGCTAC -0.100677000857  
GATGCTCA 0.053471709735  
GATGCTCC 0.0120886298272  
GATGCTGA 0.0669228422414  
GATGCTGC 0.112267371755  
GATGCTTA 0.0971975235461  
GATGAAA 0.05359202708  
GATGGAAC 0.0310534191449  
GATGGACA -0.222298897331  
GATGGACC -0.25726676561  
GATGGAGA -0.016537761998  
GATGGAGC -0.254543209877

GATGGATA 0.214020891142  
GATGGCAA 0.00530942855732  
GATGGCAC -0.105920989562  
GATGGCCA -0.137406395637  
GATGGCCC -0.430095880785  
GATGGCGA 0.225721674197  
GATGGCGC -0.265514403292  
GATGGCTA -0.166714115149  
GATGGGAA -0.0148596361241  
GATGGGAC -0.0675963768342  
GATGGGCA -0.224316630356  
GATGGGCC -0.250950476473  
GATGGGGA -0.0670810182597  
GATGGGGC -0.154594143729  
GATGGGTA -0.120594465848  
GATGGTAA 0.150562956721  
GATGGTAC -0.173384016059  
GATGGTCA -0.0827107823768  
GATGGTCC -0.216712074915  
GATGGTGA 0.0163056900128  
GATGGTGC -0.0630377760218  
GATGGTTA 0.0574974585107  
GATGTAAA 0.0701607060528  
GATGTAAAC -0.105241059079  
GATGTACA 0.140349750531  
GATGTACC -0.110420873709  
GATGTAGA 0.0644263064309  
GATGTAGC -0.102620141255  
GATGTATA 0.0955806085153  
GATGTCAA 0.0998169482661  
GATGTCAC -0.0219967166911  
GATGTCCA -0.0827553644328  
GATGTCCC -0.136069908329  
GATGT CGA 0.0929026981932  
GATGT CGC 0.0521553711388  
GATGTCTA -0.0795928560451  
GATGTGAA 0.14599247454  
GATGTGAC -0.0616741296808  
GATGTGCA 0.0204727383668  
GATGTGCC -0.0169434656178  
GATGTGGA -0.0707279800348  
GATGTGGC -0.149527777778  
GATGTGTA 0.0918265948019  
GATGTTAA 0.120719712928  
GATGTTAC 0.0408568564497  
GATGTTCA 0.0633605973879  
GATGTTCC -0.14326450687  
GATGTTGA 0.138770884103  
GATGTTGC -0.102144320311  
GATGTTTA -0.0224990055042  
GATTA AAA 0.173615227557  
GATTA AAC -0.205034490706  
GATTA ACA 0.0839088809147  
GATTA ACC -0.00757506818471

GATTAAGA 0.106063951884  
GATTAAGC -0.154105619133  
GATTAATA 0.0934450045763  
GATTAATC 0.179127987359  
GATTACAA 0.426845265538  
GATTACAC 0.453574721728  
GATTACCA 0.439000188863  
GATTACCC 0.438610068278  
GATTACGA 0.464712165366  
GATTACGC 0.458328127497  
GATTAATA 0.399844551305  
GATTAGAA 0.00718805748122  
GATTAGAC -0.0950953757645  
GATTAGCA 0.00116495422512  
GATTAGCC -0.0710728626134  
GATTAGGA 0.067849026776  
GATTAGGC 0.0286230213616  
GATTAGTA 0.00894774308834  
GATTATAA 0.243919275539  
GATTATAC 0.206848668467  
GATTATCA 0.338994818767  
GATTATCC 0.341931739603  
GATTATGA 0.203868783868  
GATTATGC 0.309928377377  
GATTATTA 0.181678845902  
GATTCAAA 0.132403062485  
GATTC AAC -0.0131172548051  
GATTCACA 0.293660017724  
GATTCACC 0.163063074187  
GATTCAGA 0.0920981131879  
GATTCAGC -0.025463077303  
GATTCATA 0.117354387583  
GATTCCAA 0.34582249793  
GATTCAC 0.376986329232  
GATTCCCA 0.468173533671  
GATTC CCC 0.486175235715  
GATTC CGA 0.425675184868  
GATTC CGC 0.411276866671  
GATTCCTA 0.424388011564  
GATTCGAA 0.323750246987  
GATTCGAC 0.292181171589  
GATTCGCA 0.46338009616  
GATTCGCC 0.45615491949  
GATTCGGA 0.366742195989  
GATTCGGC 0.322771054581  
GATTCGTA 0.381844277591  
GATTCTAA 0.308859122804  
GATTCTAC 0.359036392047  
GATTCTCA 0.482400883297  
GATTCTCC 0.472768337395  
GATTCTGA 0.398343026959  
GATTCTGC 0.405055544578  
GATTCTTA 0.406486714221  
GATTGAAA 0.126064787372

GATTGAAC -0.176463325713  
GATTGACA 0.200833168675  
GATTGACC -0.0384040608636  
GATTGAGA 0.13869129948  
GATTGAGC -0.249562731346  
GATTGATA 0.0797935394646  
GATTGCAA 0.380422731564  
GATTGCAC 0.457300207448  
GATTGCCA 0.398356892769  
GATTGCCC 0.403570879712  
GATTGCGA 0.467957229817  
GATTGCGC 0.482575218282  
GATTGCTA 0.422466166156  
GATTGGAA 0.0491800934436  
GATTGGAC -0.0493731204509  
GATTGGCA -0.0201981607659  
GATTGGCC -0.107205846033  
GATTGGGA 0.136866341742  
GATTGGGC -0.133164705699  
GATTGGTA 0.160038063138  
GATTGTAA 0.208791630991  
GATTGTAC 0.262137346912  
GATTGTCA 0.353628346869  
GATTGTCC 0.33283308878  
GATTGTGA 0.306639257333  
GATTGTGC 0.269586050188  
GATTGTTA 0.251694779216  
GATTTAAA 0.226327691058  
GATTTAAC 0.206045065594  
GATTTACA 0.298093937501  
GATTTACC 0.268852149405  
GATTTAGA 0.202082851252  
GATTTAGC 0.129194757382  
GATTTATA 0.267789907572  
GATTTCAA 0.370870076853  
GATTTCAC 0.442169421941  
GATTTCCA 0.48044688138  
GATTTCCC 0.485335522206  
GATTTCGA 0.463276335479  
GATTTCGC 0.459077037915  
GATTTCTA 0.421889064524  
GATTTGAA 0.301343059123  
GATTTGAC 0.333533334302  
GATTTGCA 0.404117602706  
GATTTGCC 0.408253308733  
GATTTGGA 0.330380776662  
GATTTGGC 0.279899119629  
GATTTGTA 0.339678208041  
GATTTTAA 0.322794299246  
GATTTTAC 0.368961108771  
GATTTTCA 0.44703780544  
GATTTTCC 0.45042426837  
GATTTTGA 0.320554094693  
GATTTTGC 0.462445338718

GATTTTTA 0.407970786523  
GCAAAAAA 0.165576404579  
GCAAAAAC -0.10083971351  
GCAAAACA -0.108758497875  
GCAAAACC -0.0585931926197  
GCAAAAGA 0.104541426351  
GCAAAAGC -0.0649812857409  
GCAAAATA 0.196181584667  
GCAAACAA 0.0641886051566  
GCAAACAC -0.161524869397  
GCAAACCA -0.212178326475  
GCAAACCC -0.184311756442  
GCAAACGA 0.067878779074  
GCAAACGC -0.230335511983  
GCAAACCTA -0.134184184911  
GCAAAGAA 0.14474529207  
GCAAAGAC 0.0843011346302  
GCAAAGCA -0.236406736135  
GCAAAGCC -0.360665522319  
GCAAAGGA -0.0699214039777  
GCAAAGGC -0.316593962558  
GCAAAGTA -0.0213400549155  
GCAAATAA -0.00126538143042  
GCAAATAC 0.243545412633  
GCAAATCA 0.360186247875  
GCAAATCC 0.424175904  
GCAAATGA 0.00670172736914  
GCAAATGC -0.0774512225241  
GCAAATTA 0.0901064896198  
GCAACAAA 0.0549547455436  
GCAACAAC -0.0721449698125  
GCAACACA -0.0788582685807  
GCAACACC -0.101690949365  
GCAACAGA 0.0210377834859  
GCAACAGC -0.174033649414  
GCAACATA 0.0914895471649  
GCAACCAA 0.023279874421  
GCAACCAC -0.0151540099673  
GCAACCCA -0.114969593185  
GCAACCCC -0.254394627691  
GCAACCGA -0.0507038775006  
GCAACCGC -0.137277174797  
GCAACCTA -0.262640480267  
GCAACGAA -0.0743347823223  
GCAACGAC -0.111874025774  
GCAACGCA -0.196438634713  
GCAACGCC -0.119292746483  
GCAACGGA 0.146341144509  
GCAACGGC -0.136130179268  
GCAACGTA 0.112318219459  
GCAACTAA -0.140865038232  
GCAACTAC -0.0893619590152  
GCAACTCA -0.0962770919067  
GCAACTCC 0.0330451963448

GCAACTGA -0.0173480131546  
GCAACTGC -0.188824981845  
GCAACTTA -0.0152444378588  
GCAAGAAA 0.104137550303  
GCAAGAAC -0.14832135625  
GCAAGACA -0.0261081167463  
GCAAGACC -0.275863471314  
GCAAGAGA 0.0997065361091  
GCAAGAGC -0.06627492572  
GCAAGATA 0.203063937356  
GCAAGCAA 0.0155535024797  
GCAAGCAC -0.200892906143  
GCAAGCCA -0.0460987068871  
GCAAGCCC -0.300590829795  
GCAAGCGA -0.0801614433713  
GCAAGCGC -0.0691700689231  
GCAAGCTA -0.152888888889  
GCAAGGAA -0.0191935156374  
GCAAGGAC -0.296701397462  
GCAAGGCA -0.128345679012  
GCAAGGCC -0.191737491878  
GCAAGGGA 0.0198698298781  
GCAAGGGC -0.0860012317847  
GCAAGGTA 0.00943297546235  
GCAAGTAA -0.172488486627  
GCAAGTAC -0.0161160323127  
GCAAGTCA -0.0351732513612  
GCAAGTCC -0.152630630997  
GCAAGTGA 0.0445737560137  
GCAAGTGC -0.0645509179221  
GCAAGTTA -0.136421765571  
GCAATAAA 0.00415934217599  
GCAATAAC 0.135320267895  
GCAATACA -0.0658804643122  
GCAATACC -0.0632676187294  
GCAATAGA 0.118865950925  
GCAATAGC -0.109333245538  
GCAATATA 0.217043188419  
GCAATCAA 0.378356275659  
GCAATCAC 0.347406090145  
GCAATCCA 0.468716042675  
GCAATCCC 0.440127555097  
GCAATCGA 0.339879672505  
GCAATCGC 0.348229279858  
GCAATCTA 0.466577202573  
GCAATGAA 0.113745636567  
GCAATGAC -0.226963785712  
GCAATGCA -0.0676665730717  
GCAATGCC -0.294942384537  
GCAATGGA 0.0678637291708  
GCAATGGC -0.229755085917  
GCAATGTA 0.0230165763515  
GCAATTAA 0.126893767046  
GCAATTAC 0.170149180004

GCAATTCA 0.147538244737  
GCAATTCC 0.157989198446  
GCAATTGA 0.000548859470021  
GCAATTGC 0.205361351404  
GCAATTTA 0.287363619194  
GCACAAAA 0.260593005509  
GCACAAAC -0.000137994747484  
GCACAACA 0.0169874914648  
GCACAACC -0.225122514721  
GCACAAGA -0.0465306146167  
GCACAAGC -0.255382716049  
GCACAATA 0.173182920983  
GCACACAA 0.0164528641785  
GCACACAC -0.245679885213  
GCACACCA -0.190676033341  
GCACACCC -0.379296173886  
GCACACGA -0.0435147683493  
GCACACGC -0.0182485145207  
GCACACTA -0.0595347867132  
GCACAGAA -0.0163734399331  
GCACAGAC -0.068474423605  
GCACAGCA 0.0217933258757  
GCACAGCC -0.330447757919  
GCACAGGA -0.0372062519894  
GCACAGGC -0.184067036141  
GCACAGTA -0.112650357786  
GCACATAA 0.0654899119629  
GCACATAC -0.0298826538453  
GCACATCA -0.00991384946174  
GCACATCC -0.00973806168553  
GCACATGA 0.110149201691  
GCACATGC -0.00334738136002  
GCACATTA 0.0700548364786  
GCACCAAA 0.185156922341  
GCACCAAC -0.19254413871  
GCACCACA -0.120806256228  
GCACCACC -0.222104240748  
GCACCAGA -0.076690912305  
GCACCAGC -0.271417637764  
GCACCATA -0.0222507629147  
GCACCCAA -0.114974318451  
GCACCCAC -0.113387818338  
GCACCCCA -0.188076405813  
GCACCCCC -0.214415422681  
GCACCCGA -0.0311518651611  
GCACCCGC -0.261307828644  
GCACCCTA -0.0709607121691  
GCACCGAA -0.166975107283  
GCACCGAC -0.312099814001  
GCACCGCA -0.0614802008726  
GCACCGCC -0.0963983697089  
GCACCGGA -0.0100198712436  
GCACCGGC -0.214588235294  
GCACCGTA -0.115324504042

GCACCTAA -0.0646172620691  
GCACCTAC -0.19306545276  
GCACCTCA -0.262120806486  
GCACCTCC -0.196547221262  
GCACCTGA -0.219602710954  
GCACCTGC -0.279005829777  
GCACCTTA -0.134390985532  
GCACGAAA 0.111240093087  
GCACGAAC -0.222317271188  
GCACGACA -0.041571029281  
GCACGACC -0.292341584834  
GCACGAGA -0.136307915759  
GCACGAGC -0.104942001493  
GCACGATA 0.0764753342554  
GCACGCAA -0.0154234550399  
GCACGCAC -0.0349843977895  
GCACGCCA -0.106149349649  
GCACGCCC -0.410491501733  
GCACGCGA 0.0775908911282  
GCACGCGC 0.0450174537311  
GCACGCTA -0.0361094645327  
GCACGGAA 0.0461590814288  
GCACGGAC -0.330781242285  
GCACGGCA -0.190544724704  
GCACGGCC -0.253276317739  
GCACGGGA -0.0790997190395  
GCACGGGC -0.181882887489  
GCACGGTA 0.139698981593  
GCACGTAA 0.117047055918  
GCACGTAC -0.189642893346  
GCACGTCA -0.231754014393  
GCACGTCC -0.181644664978  
GCACGTGA 0.090479483633  
GCACGTGC 0.00982443066785  
GCACGTTA -0.00520825766711  
GCACTAAA -0.079504448228  
GCACTAAC -0.251459804454  
GCACTACA -0.0800456651079  
GCACTACC -0.108746684331  
GCACTAGA 0.0902297525742  
GCACTAGC -0.14578943325  
GCACTATA -0.0186978214691  
GCACTCAA -0.120944081336  
GCACTCAC -0.224255953928  
GCACTCCA -0.2475986542  
GCACTCCC -0.24275017137  
GCACTCGA -0.00195649178273  
GCACTCGC -0.290569879263  
GCACTCTA 0.0292622959816  
GCACTGAA -0.155061728395  
GCACTGAC -0.165641556227  
GCACTGCA -0.0504374409976  
GCACTGCC -0.209791495199  
GCACTGGA -0.113789894758



GCACTGGC -0.247941561327  
GCACTGTA -0.0337679870921  
GCACTTAA -0.114906099422  
GCACTTAC -0.147434736559  
GCACTTCA -0.256229902953  
GCACTTCC -0.125230585098  
GCACTTGA -0.0933198313904  
GCACTTTA -0.141721098638  
GCAGAAAA 0.00067264248253  
GCAGAAAC -0.0744504361065  
GCAGAACA -0.0214163899372  
GCAGAACC -0.0425604852767  
GCAGAAGA 0.0560110639139  
GCAGAAGC -0.294747295192  
GCAGAATA 0.162196206283  
GCAGACAA -0.0600589475071  
GCAGACAC -0.0536099756246  
GCAGACCA -0.220849647384  
GCAGACCC -0.298682418007  
GCAGACGA 0.0547745993927  
GCAGACGC -0.13025210084  
GCAGACTA -0.126974511838  
GCAGAGAA 0.127576895212  
GCAGAGAC -0.293944833155  
GCAGAGCA -0.224823302164  
GCAGAGCC -0.213282488862  
GCAGAGGA 0.00765782079986  
GCAGAGGC -0.0503586265181  
GCAGAGTA -0.180960723303  
GCAGATAA 0.214859272432  
GCAGATAC 0.316016817054  
GCAGATCA 0.211681896765  
GCAGATCC 0.313033765835  
GCAGATGA -0.170669878146  
GCAGATGC -0.137874729068  
GCAGATTA 0.293230668431  
GCAGCAAA 0.217420423343  
GCAGCAAC -0.0553662270954  
GCAGCACA -0.240541371042  
GCAGCACC -0.0386534281762  
GCAGCAGA -0.0255578605376  
GCAGCAGC -0.13048655352  
GCAGCATA -0.11182733734  
GCAGCCAA -0.0495019346341  
GCAGCCAC -0.218686368429  
GCAGCCCA -0.173870733479  
GCAGCCCC -0.225415007187  
GCAGCCGA -0.226057613169  
GCAGCCGC -0.271021830838  
GCAGCCTA -0.36542069919  
GCAGCGAA 0.0514763985405  
GCAGCGAC -0.290303289661  
GCAGCGCA -0.0562391937954  
GCAGCGCC -0.321269872618

GCAGCGGA -0.0450107834906  
GCAGCGGC -0.400009292817  
GCAGCGTA -0.0297429848162  
GCAGCTAA -0.195660130719  
GCAGCTAC -0.34951486273  
GCAGCTCA -0.222189463411  
GCAGCTCC -0.229239015345  
GCAGCTGA -0.226516939198  
GCAGCTGC -0.299754057159  
GCAGCTTA -0.239013981809  
GCAGGAAA 0.0256753694266  
GCAGGAAC -0.304309756487  
GCAGGACA -0.124694958979  
GCAGGACC -0.25714708932  
GCAGGAGA 0.110468333169  
GCAGGAGC -0.393514632875  
GCAGGATA 0.080526782212  
GCAGGCAA 0.0256809960339  
GCAGGCAC -0.00529279337829  
GCAGGCCA -0.138385751298  
GCAGGCCC -0.223300251815  
GCAGGCCG 0.0379728424334  
GCAGGCCG -0.078613608175  
GCAGGCTA -0.337600011617  
GCAGGGAA 0.0373132690134  
GCAGGGAC -0.207262300416  
GCAGGGCA -0.131527877844  
GCAGGGCC -0.224403076788  
GCAGGGGA -0.0265878169315  
GCAGGGGC -0.172171387073  
GCAGGGTA -0.0834321133995  
GCAGGTAA -0.0521196952732  
GCAGGTAC -0.309885503931  
GCAGGTCA -0.107864516448  
GCAGGTCC -0.385397095167  
GCAGGTGA -0.0425378923239  
GCAGGTTA -0.19403009648  
GCAGTAAA 0.131761948671  
GCAGTAAC -0.0760945920731  
GCAGTACA -0.119779345628  
GCAGTACC -0.195873799726  
GCAGTAGA -0.0609242429232  
GCAGTAGC -0.271116287716  
GCAGTATA 0.154514918  
GCAGTCAA -0.147254185392  
GCAGTCAC -0.0730149322533  
GCAGTCCA -0.334677717982  
GCAGTCCC -0.232303706135  
GCAGTCGA -0.0630001976089  
GCAGTCGC -0.170307611414  
GCAGTCTA -0.27655888307  
GCAGTGAA -0.0655098994688  
GCAGTGAC -0.114192196048  
GCAGTGCA -0.140885069393

GCAGTGCC -0.16540976606  
GCAGTGGA 3.21051071817E-5  
GCAGTGGC -0.206897119342  
GCAGTGTA -0.0451135356588  
GCAGTTAA -0.0144305783563  
GCAGTTAC 0.108912928934  
GCAGTTCA -0.16782441701  
GCAGTTCC -0.174521604938  
GCAGTTGA 0.00234335275231  
GCAGTTTA -0.114264153014  
GCATAAAA 0.084153878241  
GCATAAAC -0.0453895660512  
GCATAACA 0.0838547498299  
GCATAACC -0.213415041556  
GCATAAGA 0.133358999317  
GCATAAGC -0.158943377176  
GCATAATA 0.0523494801322  
GCATACAA -0.0868580477387  
GCATACAC 0.0107494127204  
GCATACCA 0.000349698531266  
GCATACCC 0.0787078872053  
GCATACGA 0.101728821931  
GCATACGC -0.148993141289  
GCATACTA -0.0561675338646  
GCATAGAA 0.0657423873192  
GCATAGAC -0.250702331962  
GCATAGCA -0.0330724377468  
GCATAGCC -0.267790545015  
GCATAGGA 0.0639688313309  
GCATAGGC -0.0742797785946  
GCATAGTA 0.200059564453  
GCATATAA 0.107957913456  
GCATATAC -0.0384030915404  
GCATATCA 0.178522031219  
GCATATCC 0.362291158972  
GCATATGA -0.00837326483229  
GCATATGC 0.102544879939  
GCATATTA 0.0257158630308  
GCATCAAA 0.161136907506  
GCATCAAC 0.0629015152616  
GCATCACA -0.00730608864934  
GCATCACC -0.0729228712972  
GCATCAGA 0.155859623702  
GCATCAGC -0.0331103892708  
GCATCATA 0.0665437221454  
GCATCCAA 0.0620414626705  
GCATCCAC 0.0510109991438  
GCATCCCA -0.077130155594  
GCATCCCC -0.10113059466  
GCATCCGA -0.0253759098107  
GCATCCGC -0.217324377274  
GCATCCTA -0.0451040757753  
GCATCGAA 0.185163118641  
GCATCGAC -0.115135026863

GCATCGCA -0.172360203341  
GCATCGCC -0.2311015652  
GCATCGGA 0.0760928624352  
GCATCGGC -0.020442309592  
GCATCGTA 0.0469643920794  
GCATCTAA 0.0260180436709  
GCATCTAC 0.209959683394  
GCATCTCA 0.106188891956  
GCATCTCC 0.0499113723295  
GCATCTGA 0.0547761751081  
GCATCTTA -0.0523131682364  
GCATGAAA 0.15039766833  
GCATGAAC -0.0476791655165  
GCATGACA -0.19669426289  
GCATGACC -0.255947712418  
GCATGAGA 0.0879931502338  
GCATGAGC -0.298179499914  
GCATGATA 0.1262619697  
GCATGCAA 0.232443108166  
GCATGCAC -0.164638409694  
GCATGCCA -0.0772211462219  
GCATGCCC -0.115144431274  
GCATGCGA 0.169948846297  
GCATGCGC -0.209220079388  
GCATGCTA -0.128967470038  
GCATGGAA -0.100343998947  
GCATGGAC -0.0873603907686  
GCATGGCA -0.242750700926  
GCATGGCC -0.225066934404  
GCATGGGA -0.259541031227  
GCATGGGC -0.159820472572  
GCATGGTA 0.0298156407537  
GCATGTAA 0.122367178534  
GCATGTAC -0.110128076154  
GCATGTCA -0.113835774915  
GCATGTCC -0.141356540276  
GCATGTGA -0.0823323156118  
GCATGTTA -0.199226809781  
GCATTAAC 0.00427556549911  
GCATTAAC -0.0494573002074  
GCATTACA -0.087761684076  
GCATTACC -0.178417378706  
GCATTAGA 0.0275198138269  
GCATTAGC -0.195092616264  
GCATTATA -0.087781592728  
GCATTCAA 0.0126813980548  
GCATTCAC -0.0519632703243  
GCATTCCA -0.15716194626  
GCATTCCC -0.140362116101  
GCATTCGA -0.020395617906  
GCATTCGC -0.11188755549  
GCATTCTA -0.0333333333333  
GCATTGAA -0.00340567301148  
GCATTGAC -0.0460026440806

GCATTGCA -0.0996543209877  
GCATTGCC -0.274345679012  
GCATTGGA 0.0746814185518  
GCATTGGC -0.0980387920391  
GCATTGTA 0.0099385469179  
GCATTTAA 0.00753346835943  
GCATTTAC 0.104162550221  
GCATTTCA -0.101080876905  
GCATTTCC 0.00620311346904  
GCATTTGA 0.13850468726  
GCATTTTA 0.0711925618565  
GCCAAAAA -0.0535440849592  
GCCAAAAC -0.0976242220686  
GCCAAACA -0.187744371823  
GCCAAACC -0.0870036497352  
GCCAAAGA -0.0171991064192  
GCCAAAGC -0.338964316081  
GCCAAATA 0.0392006740953  
GCCAACAA -0.0380753575693  
GCCAACAC -0.256279933837  
GCCAACCA -0.115195110047  
GCCAACCC -0.146985710523  
GCCAACGA -0.219712861944  
GCCAACGC -0.20353254871  
GCCAACTA -0.128580600553  
GCCAAGAA 0.01382040591  
GCCAAGAC -0.0541671468475  
GCCAAGCA -0.25901049212  
GCCAAGCC -0.298402000359  
GCCAAGGA -0.156641975309  
GCCAAGGC -0.2421091937  
GCCAAGTA -0.0941333364325  
GCCAATAA 0.122324310084  
GCCAATAC -0.277907192899  
GCCAATCA -0.0699124063679  
GCCAATCC -0.0897670206635  
GCCAATGA -0.153083217387  
GCCAATTA -0.104743185765  
GCCACAAA -0.0524558716986  
GCCACAAC 0.0170300044158  
GCCACACA -0.122695817762  
GCCACACC 0.0183922808404  
GCCACAGA -0.104202519536  
GCCACAGC -0.190203436698  
GCCACATA -0.0694341946993  
GCCACCAA -0.055711957327  
GCCACCAC -0.249787965749  
GCCACCCA -0.0683950617284  
GCCACCCC -0.315575341511  
GCCACCGA -0.113867455319  
GCCACCGC -0.220050188643  
GCCACCTA -0.147424711357  
GCCACGAA 0.0365814836769  
GCCACGAC -0.115854720517

GCCACGCA -0.074826011548  
GCCACGCC -0.23181223462  
GCCACGGA -0.213993592276  
GCCACGGC -0.227917695473  
GCCACGTA 0.0495074229577  
GCCACTAA -0.166336415036  
GCCACTAC -0.24096324292  
GCCACTCA -0.112515844404  
GCCACTCC -0.266244739629  
GCCACTGA -0.0985292664927  
GCCACTTA -0.103648096931  
GCCAGAAA 0.102019380239  
GCCAGAAC -0.0218388294387  
GCCAGACA -0.268107816022  
GCCAGACC -0.208261995698  
GCCAGAGA 0.118597554282  
GCCAGAGC -0.130434424745  
GCCAGATA 0.0403027508837  
GCCAGCAA -0.0206570296465  
GCCAGCAC -0.254310013717  
GCCAGCCA -0.318428920157  
GCCAGCCC -0.329619205934  
GCCAGCGA -0.150088748028  
GCCAGCGC -0.130618393757  
GCCAGCTA -0.204270232116  
GCCAGGAA -0.0338661705957  
GCCAGGAC -0.226439912656  
GCCAGGCA -0.297347861391  
GCCAGGCC -0.27609627106  
GCCAGGGA -0.183696798389  
GCCAGGGC -0.406187640309  
GCCAGGTA -0.0534182260843  
GCCAGTAA -0.146235656311  
GCCAGTAC -0.173693423768  
GCCAGTCA -0.356727167015  
GCCAGTCC -0.14975189997  
GCCAGTGA -0.19818010167  
GCCAGTTA -0.009762837823  
GCCATAAA -0.0337094279289  
GCCATAAC -0.14638382641  
GCCATACA -0.0423884168697  
GCCATACC -0.280419361741  
GCCATAGA -0.0443987622216  
GCCATAGC -0.189076875256  
GCCATATA -0.114051625722  
GCCATCAA -0.144645855972  
GCCATCAC -0.101287982307  
GCCATCCA -0.217217365536  
GCCATCCC -0.246168913469  
GCCATCGA -0.132276831042  
GCCATCGC -0.093665453867  
GCCATCTA -0.0986082257057  
GCCATGAA -0.128787255176  
GCCATGAC -0.22321483035

GCCATGCA -0.255837557882  
GCCATGCC -0.247779478486  
GCCATGGA -0.0509728053566  
GCCATGGC -0.119913099294  
GCCATGTA 0.0411532259236  
GCCATTAA -0.109969596189  
GCCATTAC -0.115564064425  
GCCATTCA -0.0946879566762  
GCCATTCC -0.0757815200751  
GCCATTGA -0.121697041537  
GCCATTTA -0.0944952114377  
GCCCAAAA 0.0585979946656  
GCCCAAAC -0.288064504886  
GCCCAACA -0.146991198033  
GCCCAACC -0.0987746671586  
GCCCAAGA -0.032133892672  
GCCCAAGC -0.389592983577  
GCCCAATA 0.00750839754989  
GCCCACAA -0.145301678246  
GCCCACAC -0.154271248769  
GCCCACCA -0.355759652664  
GCCCACCC -0.189924597135  
GCCCACGA -0.195170795322  
GCCCACGC -0.266896151053  
GCCCACTA -0.0418615117785  
GCCCAGAA -0.0367745122252  
GCCCAGAC -0.269821098159  
GCCCAGCA -0.141893462245  
GCCCAGCC -0.283261403702  
GCCCAGGA -0.257095510171  
GCCCAGGC -0.343726767958  
GCCCAGTA -0.148136581908  
GCCCATAA -0.00358113114349  
GCCCATAC -0.171383382155  
GCCCATCA -0.374448668576  
GCCCATCC -0.0466722815336  
GCCCATGA -0.145210502925  
GCCCATTA -0.185836864991  
GCCCCAAA -0.1331775458  
GCCCCAAC -0.256542240656  
GCCCCACA -0.188321876217  
GCCCCACC -0.0586216312788  
GCCCCAGA 0.0861690678341  
GCCCCAGC -0.279846160599  
GCCCCATA -0.159696861409  
GCCCCCAA -0.148232285819  
GCCCCCAC -0.124391975309  
GCCCCCCA -0.251314192113  
GCCCCCCC -0.280881515923  
GCCCCCGA -0.355165489886  
GCCCCCGC -0.191925162737  
GCCCCCTA -0.321754538853  
GCCCCGAA -0.100407883422  
GCCCCGAC -0.21948944203

GCCCCGCA -0.185315951476  
GCCCCGCC -0.334304334946  
GCCCCGGA -0.156339869281  
GCCCCGGC -0.331033361212  
GCCCCGTA -0.126614540466  
GCCCCCTAA -0.166866124258  
GCCCCCTAC -0.0683466195645  
GCCCCCTCA -0.274005884386  
GCCCCCTCC -0.3956644883  
GCCCCCTGA -0.23756840283  
GCCCCCTTA -0.32549000244  
GCCCCGAAA -0.133306443204  
GCCCCGAAC -0.0681079716349  
GCCCCGACA -0.206155437284  
GCCCCGACC -0.351512607808  
GCCCCGAGA 0.118845611843  
GCCCCGAGC -0.113231929149  
GCCCCGATA -0.0420442759779  
GCCCCGCAA -0.123708360326  
GCCCCGCAC -0.287009743418  
GCCCCGCCA -0.207697893972  
GCCCCGCCC -0.016794687057  
GCCCCGCGA -0.106135076253  
GCCCCGCGC -0.332892386775  
GCCCCGCTA -0.130493284614  
GCCCCGGAA -0.206963016329  
GCCCCGGAC -0.398449842022  
GCCCCGGCA -0.214855967078  
GCCCCGGCC -0.345535046146  
GCCCCGGGA -0.103754376722  
GCCCCGGGC -0.190129972713  
GCCCCGGTA -0.244854849418  
GCCCCGTAA 0.0135269420191  
GCCCCGTAC -0.165544470784  
GCCCCGTCA -0.34293779731  
GCCCCGTCC -0.130144626119  
GCCCCGTGA -0.12237037037  
GCCCCGTTA -0.311206016918  
GCCCTAAA -0.0851177574655  
GCCCTAAC -0.184363865072  
GCCCTACA -0.10978581189  
GCCCTACC -0.0266705631839  
GCCCTAGA 0.0557973646361  
GCCCTAGC -0.285226731419  
GCCCTATA -0.0456760695583  
GCCCTCAA -0.10803947715  
GCCCTCAC -0.0834647979802  
GCCCTCCA -0.142762527233  
GCCCTCCC -0.120067050922  
GCCCTCGA -0.269517554689  
GCCCTCGC -0.273333772247  
GCCCTCTA -0.225839765508  
GCCCTGAA -0.034093778129  
GCCCTGAC -0.298550429502



GCCCTGCA -0.0504546626935  
GCCCTGCC -0.30847356223  
GCCCTGGA -0.0444452515509  
GCCCTGTA -0.171503190515  
GCCCTTAA -0.0524352894685  
GCCCTTAC -0.204133796517  
GCCCTTCA -0.422169565527  
GCCCTTCC -0.102574074074  
GCCCTTGA -0.133112713622  
GCCCTTTA -0.172337728612  
GCCGAAAA 0.0239796702452  
GCCGAAAC -0.269256094951  
GCCGAACA -0.101159316509  
GCCGAACC -0.281160660883  
GCCGAAGA -0.040165341302  
GCCGAAGC -0.192376061624  
GCCGAATA -0.0687625539201  
GCCGACAA -0.229874823158  
GCCGACAC -0.182831105676  
GCCGACCA -0.220238198983  
GCCGACCC -0.0803371526406  
GCCGACGA -0.226002556801  
GCCGACGC -0.360146824025  
GCCGACTA -0.239137065127  
GCCGAGAA 0.159703921084  
GCCGAGAC -0.297590242457  
GCCGAGCA -0.142115042718  
GCCGAGCC -0.0729905591866  
GCCGAGGA 0.00198712436377  
GCCGAGGC -0.136901136407  
GCCGAGTA -0.165628712598  
GCCGATAA -0.00679767144978  
GCCGATAC 0.0437123164083  
GCCGATCA -0.00513561809016  
GCCGATCC -0.0244780846396  
GCCGATGA -0.00978890864783  
GCCGATTA 0.11000682812  
GCCGAAA -0.0583436239401  
GCCGCAAC -0.12686067629  
GCCGCACA -0.0995685964566  
GCCGCACC -0.259887899865  
GCCGCAGA -0.280655834856  
GCCGCAGC -0.217084207041  
GCCGCATA -0.0680734531402  
GCCGCCAA -0.168062378168  
GCCGCCAC -0.197488646791  
GCCGCCCA -0.203907239372  
GCCGCCCC -0.119471786781  
GCCGCCGA -0.168362223649  
GCCGCCGC -0.120399554953  
GCCGCCTA -0.110537049034  
GCCGCGAA -0.137343849481  
GCCGCGAC -0.265370692321  
GCCGCGCA -0.0328779541057

GCCGCGCC -0.266829024603  
GCCGCGGA -0.0143107816022  
GCCGCGGC -0.0555352557772  
GCCGCGTA -0.0426076194295  
GCCGCTAA 0.0591140877196  
GCCGCTAC -0.164601851852  
GCCGCTCA -0.224424110385  
GCCGCTCC -0.335988824285  
GCCGCTGA -0.197436254905  
GCCGCTTA -0.128341703027  
GCCGGAAA -0.0898867154054  
GCCGGAAC -0.104559346457  
GCCGGACA -0.124455310788  
GCCGGACC -0.354456732826  
GCCGGAGA -0.0519278092034  
GCCGGAGC -0.34895284799  
GCCGGATA 0.212585218852  
GCCGGCAA -0.0894256734506  
GCCGGCAC -0.253838937441  
GCCGGCCA -0.244584115381  
GCCGGCCC -0.179833442067  
GCCGGCGA -0.0348368699197  
GCCGGCGC -0.092696673027  
GCCGGCTA -0.0433117104064  
GCCGGGAA -0.0249032682967  
GCCGGGAC -0.222002754322  
GCCGGGCA -0.312206136466  
GCCGGGCC -0.310935331812  
GCCGGGGA -0.0585286709874  
GCCGGGTA -0.28124005487  
GCCGGTAA -0.122225582659  
GCCGGTAC -0.230274204029  
GCCGGTCA -0.111574137285  
GCCGGTCC -0.183046076349  
GCCGGTGA -0.166919067215  
GCCGGTTA -0.0765439034026  
GCCGTA AA -0.140171387073  
GCCGTAAC -0.170744578526  
GCCGTACA -0.13136825585  
GCCGTACC -0.2258686729  
GCCGTAGA -0.0137543508957  
GCCGTAGC -0.211144257219  
GCCGTATA -0.122529004358  
GCCGTCAA -0.0457577676927  
GCCGTCAC -0.179739368999  
GCCGTCCA -0.369446913093  
GCCGTCCC -0.207689000941  
GCCGT CGA -0.164302127306  
GCCGT CGC -0.325269426289  
GCCGTCTA -0.177530864198  
GCCGTGAA -0.140528040533  
GCCGTGAC -0.240306512937  
GCCGTGCA -0.189683441158  
GCCGTGCC -0.25642306698

GCCGTGGA -0.0451402607665  
GCCGTGTA -0.0437683831599  
GCCGTTAA -0.0965033583564  
GCCGTTAC -0.131837437991  
GCCGTTCA -0.170824703035  
GCCGTTC -0.312650471198  
GCCGTTGA -0.0394495626077  
GCCGTTTA -0.146899024353  
GCCTAAAA 0.0298152019052  
GCCTAAAC -0.188602989596  
GCCTAACA -0.117440641788  
GCCTAACC -0.227354059495  
GCCTAAGA -0.0147763427426  
GCCTAAGC -0.272598079561  
GCCTAATA 0.047586186858  
GCCTACAA -0.133334204922  
GCCTACAC -0.17621352032  
GCCTACCA -0.152604212055  
GCCTACCC -0.161059285579  
GCCTACGA 0.00130024842735  
GCCTACGC -0.148607193384  
GCCTACTA -0.0564637833863  
GCCTAGAA -0.088432844493  
GCCTAGAC -0.299843741377  
GCCTAGCA -0.0631455321765  
GCCTAGCC -0.24087844609  
GCCTAGGA -0.211128540305  
GCCTAGGC -0.375574940879  
GCCTAGTA -0.0814643866534  
GCCTATAA 0.170585329711  
GCCTATAC 0.0302048713598  
GCCTATCA -0.0690235788067  
GCCTATCC -0.165379972565  
GCCTATGA -0.156697530864  
GCCTATTA -0.132027564088  
GCCTCAAA -0.0437469940596  
GCCTCAAC -0.0913049204076  
GCCTCACA 0.0461906781877  
GCCTCACC -0.104775144611  
GCCTCAGA -0.201518169199  
GCCTCAGC -0.259889377253  
GCCTCATA -0.0934545858646  
GCCTCCAA -0.241925925926  
GCCTCCAC -0.233112226465  
GCCTCCCA -0.190300616156  
GCCTCCCC -0.319781282161  
GCCTCCGA -0.279012284716  
GCCTCCGC -0.269356112976  
GCCTCCTA -0.271179868778  
GCCTCGAA -0.0275555336055  
GCCTCGAC -0.163962562355  
GCCTCGCA -0.207537076358  
GCCTCGCC -0.24705185254  
GCCTCGGA -0.139285341937

GCCTCGTA 0.0604521087269  
GCCTCTAA -0.196747650952  
GCCTCTAC -0.153302495048  
GCCTCTCA -0.303280172485  
GCCTCTCC -0.274610223682  
GCCTCTGA -0.0827588110366  
GCCTCTTA -0.198003579148  
GCCTGAAA 0.0203891221426  
GCCTGAAC -0.252324733538  
GCCTGACA -0.333369334452  
GCCTGACC -0.36473298774  
GCCTGAGA -0.00407782442853  
GCCTGAGC -0.087341563786  
GCCTGATA 0.0100029638411  
GCCTGCAA 0.00502641044564  
GCCTGCAC -0.263075606465  
GCCTGCCA -0.134184458969  
GCCTGCCC -0.279121885921  
GCCTGCGA -0.000344498553106  
GCCTGCGC -0.160788681001  
GCCTGCTA -0.171838013831  
GCCTGGAA 0.0477906384218  
GCCTGGAC -0.0435649690762  
GCCTGGCA -0.307233302068  
GCCTGGCC -0.150105888033  
GCCTGGGA -0.236004125793  
GCCTGGTA -0.0648767779534  
GCCTGTAA -0.0755839794558  
GCCTGTAC -0.158828532236  
GCCTGTCA -0.156353400168  
GCCTGTCC -0.182441834455  
GCCTGTGA -0.217761521835  
GCCTGTTA -0.0810804877781  
GCCTTAAA 0.0176412476574  
GCCTTAAC -0.176989081149  
GCCTTACA -0.00298548661253  
GCCTTACC -0.270323060345  
GCCTTAGA -0.0883500533122  
GCCTTAGC -0.28170798583  
GCCTTATA -0.134946112648  
GCCTTCAA -0.138596722247  
GCCTTCAC -0.043053154414  
GCCTTCCA -0.272178994543  
GCCTTCCC -0.270604790576  
GCCTTCGA -0.00677259131198  
GCCTTCGC -0.210328784925  
GCCTTCTA -0.0827296475573  
GCCTTGAA -0.24352117003  
GCCTTGAC -0.263047449761  
GCCTTGCA -0.315856127185  
GCCTTGCC -0.376297283658  
GCCTTGGA -0.194139827439  
GCCTTGTA -0.246421119561  
GCCTTTAA -0.191562271937

GCCTTTAC -0.0556393205675  
GCCTTTCA -0.283041484261  
GCCTTTCC -0.307985641181  
GCCTTTGA -0.122490616821  
GCCTTTTA -0.0472076110041  
GCGAAAAA 0.0605710649944  
GCGAAAAC 0.0415152281093  
GCGAAACA -0.0283484788621  
GCGAAACC -0.121498530283  
GCGAAAGA -0.142226831959  
GCGAAAGC -0.112520988691  
GCGAAATA 0.194745682068  
GCGAACAA -0.0409934188543  
GCGAACAC -0.00460195933152  
GCGAACCA -0.138630559647  
GCGAACCC -0.132800496071  
GCGAACGA -0.271200199825  
GCGAACGC -0.153567909996  
GCGAACTA -0.0881335987099  
GCGAAGAA 0.0267592293993  
GCGAAGAC -0.0915924860487  
GCGAAGCA -0.1313651893  
GCGAAGCC -0.0991209008297  
GCGAAGGA -0.141700682511  
GCGAAGTA 0.0246756642889  
GCGAATAA 0.0773041120551  
GCGAATAC 0.0980329202563  
GCGAATCA 0.346567779989  
GCGAATCC 0.471615358912  
GCGAATGA 0.0944198854095  
GCGAATTA 0.207282267448  
GCGACAAA -0.102022896155  
GCGACAAC -0.185785241898  
GCGACACA 0.0403384267492  
GCGACACC -0.216235294118  
GCGACAGA -0.0219516345035  
GCGACAGC 0.0275829326659  
GCGACATA 0.119580012734  
GCGACCAA -0.0713986928105  
GCGACCAC -0.0985934816132  
GCGACCCA -0.236197530864  
GCGACCCC -0.266286051233  
GCGACCGA -0.0406589727971  
GCGACCGC -0.166984942271  
GCGACCTA -0.305112460972  
GCGACGAA 0.0311110836708  
GCGACGAC -0.147887478529  
GCGACGCA -0.0536634687462  
GCGACGCC -0.326273832169  
GCGACGGA -0.107324108961  
GCGACGTA 0.0626168370093  
GCGACTAA -0.194986362863  
GCGACTAC -0.185271604938  
GCGACTCA -0.283807335585

GCGACTCC -0.0493265099511  
GCGACTGA -0.160315975682  
GCGACTTA -0.00788186689616  
GCGAGAAA 0.144465301104  
GCGAGAAC -0.0419755059347  
GCGAGACA -0.0497799020819  
GCGAGACC -0.298473278255  
GCGAGAGA -0.144227128299  
GCGAGAGC -0.0343462906253  
GCGAGATA 0.200339640352  
GCGAGCAA 0.101785537884  
GCGAGCAC -0.25169853631  
GCGAGCCA -0.0524844864852  
GCGAGCCC -0.290374613207  
GCGAGCGA -0.0490070169831  
GCGAGCGC -0.197530407018  
GCGAGCTA -0.0931457031971  
GCGAGGAA -0.0102968778146  
GCGAGGAC -0.189156136529  
GCGAGGCA -0.175265188042  
GCGAGGCC -0.25955265069  
GCGAGGGA -0.164647318783  
GCGAGGTA -0.0693182379377  
GCGAGTAA 0.13278831588  
GCGAGTAC -0.110844308089  
GCGAGTCA -0.178308187996  
GCGAGTCC -0.323122444896  
GCGAGTGA -0.116054799297  
GCGAGTTA 0.00305812618947  
GCGATAAA 0.071283123669  
GCGATAAC -0.0574159134687  
GCGATACA 0.0174647083361  
GCGATACC 0.124557988174  
GCGATAGA -0.0817619747692  
GCGATAGC -0.277341628401  
GCGATATA 0.335230708063  
GCGATCAA 0.134233305344  
GCGATCAC 0.292855171211  
GCGATCCA 0.36273831868  
GCGATCCC 0.354273386312  
GCGATCGA 0.286441524512  
GCGATCGC 0.426950424649  
GCGATCTA 0.389209265321  
GCGATGAA -0.0576379213542  
GCGATGAC -0.0735613684431  
GCGATGCA -0.138698207319  
GCGATGCC -0.215209876543  
GCGATGGA 0.0155644397441  
GCGATGTA 0.0133671349498  
GCGATTAA -0.139873671488  
GCGATTAC 0.414099341885  
GCGATTCA 0.172432435399  
GCGATTCC 0.404159202531  
GCGATTGA 0.000941293991086

GCGATTTA 0.259612395217  
GCGCAAAA 0.0191442183143  
GCGCAAAC -0.120296274342  
GCGCAACA 0.0130097482312  
GCGCAACC -0.0980900583674  
GCGCAAGA 0.00996179938089  
GCGCAAGC -0.130619351015  
GCGCAATA 0.13063404246  
GCGCACAA 0.128799031716  
GCGCACAC -0.170650402489  
GCGCACCA -0.0122191489128  
GCGCACCC -0.219639117313  
GCGCACGA -0.0818437562562  
GCGCACGC -0.05116586521  
GCGCACTA -0.0405923295122  
GCGCAGAA 0.023594166749  
GCGCAGAC -0.151709972808  
GCGCAGCA -0.182986848386  
GCGCAGCC -0.24694641078  
GCGCAGGA 0.0317307428446  
GCGCAGTA 0.0215125469275  
GCGCATAA 0.120328794619  
GCGCATAC 0.0301672163061  
GCGCATCA 0.0205204138143  
GCGCATCC -0.0358465869801  
GCGCATGA 0.00339226824343  
GCGCATTA -0.133208979475  
GCGCCAAA 0.0796908183928  
GCGCCAAC -0.183485145984  
GCGCCACA -0.0934471378437  
GCGCCACC -0.126609454529  
GCGCCAGA 0.0857112034791  
GCGCCAGC -0.101276795416  
GCGCCATA -0.0943780390091  
GCGCCCAA -0.147933360838  
GCGCCCAC -0.150263365088  
GCGCCCCA -0.359326386488  
GCGCCCCC -0.251966570255  
GCGCCCGA -0.249318277835  
GCGCCCGC -0.369638077058  
GCGCCCTA -0.177855700426  
GCGCCGAA -0.169708570017  
GCGCCGAC -0.298454183174  
GCGCCGCA -0.0436716620858  
GCGCCGCC -0.16093177679  
GCGCCGGA 0.00848262310918  
GCGCCGTA 0.0106972710707  
GCGCCTAA -0.0779051131748  
GCGCCTAC 0.0239741816505  
GCGCCTCA -0.220079132448  
GCGCCTCC -0.291724962828  
GCGCCTGA -0.150794826631  
GCGCCTTA -0.212135679909  
GCGCGAAA 0.13781038003

GCGCGAAC -0.129993032373  
GCGCGACA 0.171987676578  
GCGCGACC -0.0809055941618  
GCGCGAGA -0.0337576017037  
GCGCGAGC -0.111791663236  
GCGCGATA 0.254865229566  
GCGCGCAA 0.257111620131  
GCGCGCAC -0.0787837378028  
GCGCGCCA -0.11059650856  
GCGCGCCC -0.157392641933  
GCGCGCGA 0.143584381655  
GCGCGCGC 0.087946869445  
GCGCGCTA 0.176280559622  
GCGCGGAA 0.115294379137  
GCGCGGAC -0.283616816431  
GCGCGGCA -0.237354814537  
GCGCGGCC -0.234910713248  
GCGCGGGA 0.0650771118668  
GCGCGGTA -0.153508410856  
GCGCGTAA -0.0293739921259  
GCGCGTAC -0.175724161959  
GCGCGTCA -0.206108966034  
GCGCGTCC -0.231096586783  
GCGCGTGA 0.0201981607659  
GCGCGTTA -0.0137653955081  
GCGCTAAA 0.0241196294101  
GCGCTAAC -0.0662981418796  
GCGCTACA -0.0598476462744  
GCGCTACC -0.215314470067  
GCGCTAGA -0.00578008651972  
GCGCTAGC -0.186981430265  
GCGCTATA -0.0301002766252  
GCGCTCAA -0.300238198983  
GCGCTCAC -0.0637029741516  
GCGCTCCA -0.18842383852  
GCGCTCCC -0.211139380949  
GCGCTCGA -0.0244862675361  
GCGCTCTA -0.0696008693934  
GCGCTGAA -0.00234088563964  
GCGCTGAC -0.176658653318  
GCGCTGCA -0.173036649215  
GCGCTGCC -0.360668734318  
GCGCTGGA 0.0922358339371  
GCGCTGTA 0.141438341127  
GCGCTTAA -0.0579332147797  
GCGCTTAC 0.0187810211197  
GCGCTTCA -0.0751382989232  
GCGCTTCC -0.099287101979  
GCGCTTGA -0.13053785746  
GCGCTTTA -0.0934908482204  
GCGGAAAA 0.172160155739  
GCGGAAAC -0.084493272787  
GCGGAAACA -0.11367690239  
GCGGAAACC -0.277697421733



GCGGAAGA 0.0419813171008  
GCGGAAGC -0.126821437392  
GCGGAATA 0.196230275833  
GCGGACAA -0.107018395952  
GCGGACAC -0.333524997677  
GCGGACCA -0.170051183671  
GCGGACCC -0.297824792716  
GCGGACGA -0.078926725528  
GCGGACGC -0.301331319805  
GCGGACTA -0.136500726697  
GCGGAGAA -0.101184087076  
GCGGAGAC -0.170635877443  
GCGGAGCA -0.0589521567595  
GCGGAGCC -0.0844665042364  
GCGGAGGA 0.0341239221884  
GCGGAGTA -0.0883688702286  
GCGGATAA 0.0847631122527  
GCGGATAC 0.307522554589  
GCGGATCA 0.108571643999  
GCGGATCC 0.357282816308  
GCGGATGA -0.127002941306  
GCGGATTA 0.334699993414  
GCGGCAAA -0.0464659434485  
GCGGCAAC -0.14534794215  
GCGGCACA -0.246430727023  
GCGGCACC -0.361939397929  
GCGGCAGA -0.0112686026603  
GCGGCAGC -0.279662179213  
GCGGCATA 0.0935775069745  
GCGGCCAA -0.205400007681  
GCGGCCAC -0.149864923747  
GCGGCCCA -0.237351790584  
GCGGCCCC -0.394944707741  
GCGGCCGA -0.174576615832  
GCGGCCGC -0.310205446556  
GCGGCCTA -0.125733593242  
GCGGCGAA -0.10498245614  
GCGGCGAC -0.264141276974  
GCGGCGCA 0.0232484194409  
GCGGCGCC -0.177108367627  
GCGGCGGA 0.0160386869224  
GCGGCGTA -0.0656182354394  
GCGGCTAA -0.113654823449  
GCGGCTAC -0.174199018736  
GCGGCTCA -0.397654144596  
GCGGCTCC -0.29969333705  
GCGGCTGA -0.133140721717  
GCGGCTTA -0.136452572585  
GCGGGAAA -0.00325667604063  
GCGGGAAC -0.197123932046  
GCGGGACA -0.124224812583  
GCGGGACC -0.192496732026  
GCGGGAGA -0.173957383012  
GCGGGAGC -0.217267083632

GCGGGATA 0.116106412353  
GCGGGCAA -0.0513979450701  
GCGGGCAC -0.12933972048  
GCGGGCCA -0.378184770148  
GCGGGCCC -0.284625871613  
GCGGGCGA -0.0462834908404  
GCGGGCTA -0.207909849042  
GCGGGGAA 0.0134340890008  
GCGGGGAC -0.09136995375  
GCGGGGCA -0.214775464194  
GCGGGGCC -0.184214135629  
GCGGGGGA 0.0955872985333  
GCGGGGTA -0.12976437463  
GCGGGTAA -0.0229203714681  
GCGGGTAC -0.129026010321  
GCGGGTCA -0.20046768337  
GCGGGTCC -0.290239176581  
GCGGGTGA -0.083977162117  
GCGGGTTA 0.0356552833213  
GCGGTAAA -0.109306582598  
GCGGTAAAC -0.149735789422  
GCGGTACA -0.0797410599625  
GCGGTACC -0.157870039386  
GCGGTAGA 0.105511891099  
GCGGTAGC -0.228189814815  
GCGGTATA 0.0383213681969  
GCGGTCAA -0.211419573756  
GCGGTCAC -0.188571584509  
GCGGTCCA -0.307551323907  
GCGGTCCC -0.348881866263  
GCGGTCGA -0.168576320295  
GCGGTCTA -0.219046096498  
GCGGTGAA 0.11034278376  
GCGGTGAC -0.0605249871031  
GCGGTGCA -0.0782013926614  
GCGGTGCC -0.288307270233  
GCGGTGGA -0.0318855850813  
GCGGTGTA 0.0788037714468  
GCGGTTAA 0.137412456915  
GCGGTTAC -0.142356078276  
GCGGTTCA 0.0501657555599  
GCGGTTCC -0.0827290689059  
GCGGTTGA -0.0778290375811  
GCGGTTTA -0.153931869814  
GCGTAAAA 0.249367309285  
GCGTAAAC -0.109506017165  
GCGTAACA -0.0876963350785  
GCGTAACC -0.0925367973921  
GCGTAAGA 0.0253817209769  
GCGTAAGC -0.173122895892  
GCGTAATA 0.200887637304  
GCGTACAA -0.109887335847  
GCGTACAC 0.0435968212921  
GCGTACCA -0.130322640611

GCGTACCC -0.121004128426  
GCGTACGA 0.0675039588569  
GCGTACGC 0.00544006057314  
GCGTACTA -0.0234991951932  
GCGTAGAA 0.0115315374651  
GCGTAGAC -0.198498142569  
GCGTAGCA 0.000592709671046  
GCGTAGCC -0.0983670623102  
GCGTAGGA -0.0137593886653  
GCGTAGTA -0.163403858291  
GCGTATAA -0.0405325297634  
GCGTATAC -0.163532404663  
GCGTATCA 0.319458165931  
GCGTATCC 0.425692618366  
GCGTATGA 0.158701101452  
GCGTATTA 0.0193253419394  
GCGTCAAA -0.0242321456014  
GCGTCAAC -0.190894670788  
GCGTCACA -0.0109244527605  
GCGTCACC -0.14758933667  
GCGTCAGA -0.0100576758241  
GCGTCAGC -0.176929557008  
GCGTCATA 0.0128920721166  
GCGTCCAA -0.192087558716  
GCGTCCAC -0.278609414437  
GCGTCCCA -0.260908093278  
GCGTCCCC -0.176450819987  
GCGTCCGA -0.253959471509  
GCGTCCTA -0.142642373802  
GCGTCGAA -0.0260011155786  
GCGTCGAC -0.221749187784  
GCGTCGCA -0.0127737843002  
GCGTCGCC -0.302230781048  
GCGTCGGA -0.232166861444  
GCGTCGTA 0.0322728844539  
GCGTCTAA -0.0747697534523  
GCGTCTAC -0.155934503006  
GCGTCTCA -0.288233551542  
GCGTCTCC -0.185675330162  
GCGTCTGA -0.265838724014  
GCGTCTTA -0.121307551073  
GCGTGAAA 0.0141690758793  
GCGTGAAAC -0.0885716794538  
GCGTGACA -0.248981068056  
GCGTGACC -0.00682203433896  
GCGTGAGA -0.123389943777  
GCGTGAGC -0.0698040958864  
GCGTGATA 0.185827719524  
GCGTGCAA -0.0315821822712  
GCGTGCAC -0.0193608929718  
GCGTGCCA -0.233405483405  
GCGTGCCC -0.21818675621  
GCGTGCGA -0.00516467392094  
GCGTGCTA -0.0701004360849

GCGTGGAA -0.115130948161  
GCGTGGAC -0.231697280927  
GCGTGGCA -0.0389478883675  
GCGTGGCC -0.389854356949  
GCGTGGGA -0.109873939204  
GCGTGGTA -0.138439979617  
GCGTGTAA 0.122681068739  
GCGTGTAC -0.0641715439324  
GCGTGTCA -0.163465840747  
GCGTGTCC -0.269413307436  
GCGTGTGA -0.1124473199  
GCGTGTTA -0.123630780751  
GCGTTAAA -0.193868953716  
GCGTTAAC 0.178656949641  
GCGTTACA 0.0462368423941  
GCGTTACC -0.141914028416  
GCGTTAGA -0.115978532859  
GCGTTAGC -0.164259382453  
GCGTTATA 0.116882368438  
GCGTTCAA -0.118702331962  
GCGTTCAC -0.18762243403  
GCGTTCCA -0.182603184011  
GCGTTCCC -0.0264349948426  
GCGTTCGA -0.0200703151105  
GCGTTCTA -0.112058721844  
GCGTTGAA 0.0630302830737  
GCGTTGAC -0.0929959445295  
GCGTTGCA -0.261957666733  
GCGTTGCC -0.190987654321  
GCGTTGGA 0.0360163487313  
GCGTTGTA -0.0700684778282  
GCGTTTAA -0.147021050949  
GCGTTTAC 0.0595920561359  
GCGTTTCA 0.00669059693956  
GCGTTTCC -0.282287909186  
GCGTTTGA -0.0506083205742  
GCGTTTTA -0.0139688086536  
GCTAAAAA 0.183069331928  
GCTAAAAC -0.128439700653  
GCTAAACA -0.0113408231866  
GCTAAACC -0.134035185917  
GCTAAAGA 0.132886741876  
GCTAAAGC -0.129909506484  
GCTAAATA 0.238831096909  
GCTAACAA -0.0397331571668  
GCTAACAC -0.082194449933  
GCTAACCA 0.00100094634928  
GCTAACCC -0.227130235707  
GCTAACGA 0.0358781398457  
GCTAACTA -0.101800630028  
GCTAAGAA -0.00388048370197  
GCTAAGAC -0.210326185835  
GCTAAGCA -0.158972222222  
GCTAAGCC -0.268603827073

GCTAAGGA -0.113756613757  
GCTAAGTA -0.0294233864641  
GCTAATAA 0.0132247689302  
GCTAATAC 0.0292679312389  
GCTAATCA -0.0594321889372  
GCTAATCC 0.0516929570353  
GCTAATGA -0.0778293603758  
GCTAATTA 0.0495921974138  
GCTACAAA 0.165933491203  
GCTACAAC -0.103912854031  
GCTACACA -0.124464336038  
GCTACACC -0.168760151894  
GCTACAGA 0.0112280528422  
GCTACAGC -0.0473816658983  
GCTACATA -0.00242870315484  
GCTACCAA -0.0636622666206  
GCTACCAC -0.105453283096  
GCTACCCA -0.220276734601  
GCTACCCC -0.227227595385  
GCTACCGA 0.0878107311949  
GCTACCTA -0.203927281812  
GCTACGAA 0.0178653757492  
GCTACGAC -0.21168627451  
GCTACGCA 0.00718731475993  
GCTACGCC -0.104304486649  
GCTACGGA -0.0937669778239  
GCTACGTA -0.0875576815588  
GCTACTAA -0.137848580112  
GCTACTAC -0.129489711934  
GCTACTCA -0.193729499505  
GCTACTCC -0.124216736919  
GCTACTGA -0.0633443933733  
GCTACTTA -0.0838686341332  
GCTAGAAA 0.0711606351605  
GCTAGAAC 0.0989456409581  
GCTAGACA -0.0925869977602  
GCTAGACC -0.0808602044343  
GCTAGAGA 0.164899856762  
GCTAGAGC -0.208351165981  
GCTAGATA 0.110652813454  
GCTAGCAA -0.0683924555771  
GCTAGCAC -0.0510094261635  
GCTAGCCA -0.278263786629  
GCTAGCCC -0.0902582446435  
GCTAGCGA 0.0827734966739  
GCTAGCTA -0.13083694155  
GCTAGGAA -0.0618829572726  
GCTAGGAC -0.146899862826  
GCTAGGCA -0.251651659067  
GCTAGGCC -0.236244862572  
GCTAGGGA -0.0705289672544  
GCTAGGTA -0.162253836528  
GCTAGTAA -0.0830081501605  
GCTAGTAC -0.159161689172

GCTAGTCA -0.117142989956  
GCTAGTCC -0.217597097602  
GCTAGTGA -0.139027441684  
GCTAGTTA -0.0329243087962  
GCTATAAA 0.0367948513068  
GCTATAAC -0.0963996597239  
GCTATACA -0.0962360843191  
GCTATACC -0.0336856663045  
GCTATAGA -0.0317385840426  
GCTATAGC -0.257385774614  
GCTATATA 0.17408605869  
GCTATCAA -0.0281125820545  
GCTATCAC 0.000103148199265  
GCTATCCA 0.0738655074755  
GCTATCCC 0.0642851654262  
GCTATCGA -0.153231250515  
GCTATCTA 0.0803019627318  
GCTATGAA -0.0381517586042  
GCTATGAC -0.165811565952  
GCTATGCA -0.128925433903  
GCTATGCC -0.29727492419  
GCTATGGA 0.248567335244  
GCTATGTA 0.0215578094572  
GCTATTAA -0.223349849924  
GCTATTAC 0.076572283643  
GCTATTCA -0.0695378670115  
GCTATTCC -0.0245367626073  
GCTATTGA 0.00929060189153  
GCTATTTA 0.0178940333851  
GCTCAAAA -0.162624631046  
GCTCAAAC -0.159204937168  
GCTCAACA -0.170389803573  
GCTCAACC -0.152947890601  
GCTCAAGA -0.126676336715  
GCTCAAGC -0.355109551598  
GCTCAATA 0.017448242552  
GCTCACAA -0.180717176417  
GCTCACAC -0.167026870007  
GCTCACCA -0.161552775821  
GCTCACCC -0.252532792694  
GCTCACGA -0.144899317344  
GCTCACTA -0.120409697528  
GCTCAGAA -0.0535257220387  
GCTCAGAC -0.174637275561  
GCTCAGCA -0.109278373143  
GCTCAGCC -0.221163289604  
GCTCAGGA -0.0465430825331  
GCTCAGTA -0.07860263207  
GCTCATAA -0.14192116828  
GCTCATAC 0.0260874576048  
GCTCATCA -0.0361197535132  
GCTCATCC -0.17825971557  
GCTCATGA -0.196646416753  
GCTCATTA -0.195914774444

GCTCCAAA -0.110293391287  
GCTCCAAC -0.207934861927  
GCTCCACA -0.081178007167  
GCTCCACC -0.23981170584  
GCTCCAGA -0.282049122236  
GCTCCAGC -0.307136783785  
GCTCCATA -0.214520996784  
GCTCCCAA -0.133047578448  
GCTCCCAC -0.181554282453  
GCTCCCCA -0.160749555599  
GCTCCCCC -0.226800096427  
GCTCCCGA -0.208767026985  
GCTCCCTA -0.378395457912  
GCTCCGAA -0.140206606307  
GCTCCGAC -0.162954549196  
GCTCCGCA -0.18645346413  
GCTCCGCC -0.182041911535  
GCTCCGGA -0.176315139541  
GCTCCGTA -0.0695589905674  
GCTCCTAA -0.00139273090518  
GCTCCTAC -0.17157564789  
GCTCCTCA -0.28152152757  
GCTCCTCC -0.340191771036  
GCTCCTGA -0.166032984397  
GCTCCTTA -0.0680887615535  
GCTCGAAA 0.0748667063763  
GCTCGAAC -0.29387656702  
GCTCGACA -0.148944444444  
GCTCGACC -0.31916399243  
GCTCGAGA -0.171352909218  
GCTCGAGC 0.0759401331472  
GCTCGATA 0.0350858416211  
GCTCGCAA -0.23976672727  
GCTCGCAC -0.18256045566  
GCTCGCCA -0.0810610551274  
GCTCGCCC -0.246612143426  
GCTCGCGA -0.0524730031143  
GCTCGCTA -0.324109739369  
GCTCGGAA -0.0145903854256  
GCTCGGAC -0.285088441196  
GCTCGGCA -0.143339506173  
GCTCGGCC -0.0205327413984  
GCTCGGGA -0.185142636384  
GCTCGGTA -0.178663761801  
GCTCGTAA 0.0737667127709  
GCTCGTAC -0.0397265331486  
GCTCGTCA -0.216408204926  
GCTCGTCC -0.319685125316  
GCTCGTGA -0.149775275349  
GCTCGTTA -0.116662277309  
GCTCTAAA -0.130164600415  
GCTCTAAC -0.170499124872  
GCTCTACA -0.139908889915  
GCTCTACC -0.220385802469

GCTCTAGA 0.00969830107499  
GCTCTATA -0.0696433863479  
GCTCTCAA -0.222675381264  
GCTCTCAC -0.202721546936  
GCTCTCCA -0.304812291557  
GCTCTCCC -0.374617340641  
GCTCTCGA -0.217598766347  
GCTCTCTA -0.140914337564  
GCTCTGAA -0.301386283094  
GCTCTGAC -0.21805604371  
GCTCTGCA -0.184878525515  
GCTCTGCC -0.331056964874  
GCTCTGGA 0.0124394942211  
GCTCTGTA 0.143089797045  
GCTCTTAA -0.163286575126  
GCTCTTAC -0.0175779093619  
GCTCTTCA -0.113072896089  
GCTCTTCC -0.233057188009  
GCTCTTGA -0.0800443470508  
GCTCTTTA -0.0928377013916  
GCTGAAAA -0.0291497909052  
GCTGAAAC -0.132923161856  
GCTGAACA -0.0798142934756  
GCTGAACC -0.275162938824  
GCTGAAGA 0.0573420048846  
GCTGAAGC -0.23170462436  
GCTGAATA 0.106698280972  
GCTGACAA -0.0651381904073  
GCTGACAC -0.174789096723  
GCTGACCA -0.147526553095  
GCTGACCC -0.254484125025  
GCTGACGA -0.0954131825604  
GCTGACTA -0.181925925926  
GCTGAGAA -0.0960675854696  
GCTGAGAC -0.0940046422046  
GCTGAGCA -0.00426897118314  
GCTGAGCC -0.0715895061728  
GCTGAGGA -0.12704621579  
GCTGAGTA 0.0530544942106  
GCTGATAA 0.067732002898  
GCTGATAC 0.195092098619  
GCTGATCA -0.0153865151889  
GCTGATCC -0.00689951101452  
GCTGATGA -0.0372602288631  
GCTGATTA 0.196958220817  
GCTGCAA 0.02102334636  
GCTGCAAC -0.136041940854  
GCTGCACA -0.0943934105975  
GCTGCACC -0.31337945591  
GCTGCAGA -0.0481682720013  
GCTGCAGC -0.18261704725  
GCTGCATA -0.0656385745209  
GCTGCCAA -0.142375254952  
GCTGCCAC -0.226885568786



GCTGCCCA -0.115802469136  
GCTGCCCC -0.264441565684  
GCTGCCGA -0.203695473251  
GCTGCCTA -0.0860855916669  
GCTGCGAA -0.0181552300113  
GCTGCGAC -0.395207184546  
GCTGCGCA -0.0786204682406  
GCTGCGCC -0.105777067075  
GCTGCGGA -0.0360669034039  
GCTGCGTA -0.120500393898  
GCTGCTAA -0.127855764985  
GCTGCTAC -0.307015233329  
GCTGCTCA -0.298201484821  
GCTGCTCC -0.213306456298  
GCTGCTGA -0.0227968780873  
GCTGCTTA -0.232814324979  
GCTGGAAA 0.11023514578  
GCTGGAAC -0.0321446798703  
GCTGGACA -0.155026870007  
GCTGGACC -0.219083663487  
GCTGGAGA 0.0489390546444  
GCTGGATA 0.192301148214  
GCTGGCAA -0.077601062487  
GCTGGCAC -0.372639821305  
GCTGGCCA -0.281749950622  
GCTGGCCC -0.355932006528  
GCTGGCGA -0.142854914845  
GCTGGCTA -0.213537637771  
GCTGGGAA -0.0279562113777  
GCTGGGAC -0.343269541942  
GCTGGGCA -0.162519132968  
GCTGGGCC -0.242247679242  
GCTGGGGA 0.103504670333  
GCTGGGTA 0.115948745515  
GCTGGTAA -0.0489942457769  
GCTGGTAC -0.274805568841  
GCTGGTCA -0.327338766832  
GCTGGTCC -0.285604165295  
GCTGGTGA -0.102400199765  
GCTGGTTA 0.0043162436622  
GCTGTAAA -0.0933401514315  
GCTGTAAAC -0.0893539436026  
GCTGTACA -0.127850563028  
GCTGTACC -0.153886254884  
GCTGTAGA -0.15272152524  
GCTGTATA 0.025906166985  
GCTGTCAA -0.133174736449  
GCTGTCAC -0.110057722531  
GCTGTCCA -0.294842465039  
GCTGTCCC -0.230540539755  
GCTGTCGA -0.0736990275362  
GCTGTCTA -0.286986906159  
GCTGTGAA 0.0815193527849  
GCTGTGAC -0.183117577335

GCTGTGCA 0.0178866248762  
GCTGTGCC -0.209629444588  
GCTGTGGA -0.0776391560279  
GCTGTGTA -0.0784492903113  
GCTGTTAA -0.0943097260635  
GCTGTTAC -0.068495393957  
GCTGTTCA -0.0935905034739  
GCTGTTCC -0.275890862937  
GCTGTTGA -0.116694168778  
GCTGTTTA -0.0393062391409  
GCTTAAAA 0.0634399218424  
GCTTAAAC -0.119864122531  
GCTTAAACA -0.0109524907243  
GCTTAAACC -0.167350210872  
GCTTAAAGA -0.033035026804  
GCTTAAAGC -0.277897713247  
GCTTAAATA -0.0523908862172  
GCTTACAA -0.0823206876111  
GCTTACAC 0.103919631572  
GCTTACCA -0.320204892044  
GCTTACCC -0.270587472842  
GCTTACGA -0.0598924890513  
GCTTACTA -0.223490272566  
GCTTAGAA 0.0564904614419  
GCTTAGAC -0.251663498099  
GCTTAGCA -0.136391103261  
GCTTAGCC -0.19472421296  
GCTTAGGA 0.0471968387256  
GCTTAGTA -0.121201337466  
GCTTATAA 0.0219348078738  
GCTTATAC 0.0290830945559  
GCTTATCA 0.0231153661761  
GCTTATCC -0.110064281502  
GCTTATGA -0.0496781372518  
GCTTATTA -0.121752970555  
GCTTCAA 0.164421367184  
GCTTCAAC -0.247198902606  
GCTTCACA -0.129413830184  
GCTTCACC -0.126467150641  
GCTTCAGA -0.070248523568  
GCTTCATA -0.0216306132233  
GCTTCCAA 0.0312295260974  
GCTTCCAC -0.2558066924  
GCTTCCCA -0.323870619088  
GCTTCCCC -0.189706447188  
GCTTCCGA -0.088306144062  
GCTTCCTA -0.224496682964  
GCTTCGAA -0.0797053722365  
GCTTCGAC -0.158012530972  
GCTTCGCA -0.0663624003533  
GCTTCGCC -0.123732385092  
GCTTCGGA 0.000383518022442  
GCTTCGTA -0.0712560982971  
GCTTCTAA -0.134215327937

GCTTCTAC -0.192645315818  
GCTTCTCA -0.167109826907  
GCTTCTCC -0.241911401598  
GCTTCTGA -0.127266341806  
GCTTCTTA -0.161039941903  
GCTTGAAA -0.113752509449  
GCTTGAAC -0.246811026253  
GCTTGACA -0.0147385701626  
GCTTGACC -0.36916810664  
GCTTGAGA -0.171619636597  
GCTTGATA 0.149016718259  
GCTTGCAA -0.105654417595  
GCTTGCAC -0.178829805161  
GCTTGCCA -0.108594590441  
GCTTGCCC -0.142034138232  
GCTTGCGA 0.00288382915439  
GCTTGCTA -0.13683900149  
GCTTGGAA 0.0583165051647  
GCTTGGAC -0.34576922022  
GCTTGGCA -0.269740263136  
GCTTGGCC -0.339653384684  
GCTTGGGA -0.12265900648  
GCTTGGTA -0.111115145846  
GCTTGTAA 0.070081211047  
GCTTGTAC -0.250887473321  
GCTTGTCA -0.193828874893  
GCTTGTCC -0.235679012346  
GCTTGTGA 0.119853849171  
GCTTGTTA -0.212811606609  
GCTTTAAA 0.0855342598081  
GCTTTAAC -0.0946469535821  
GCTTTACA 0.061520941612  
GCTTTACC -0.0121366550308  
GCTTTAGA -0.0877094874692  
GCTTTATA -0.169921915615  
GCTTTCAA -0.15441031213  
GCTTTCAC -0.0494632154383  
GCTTTCCA -0.233222948439  
GCTTTCCC -0.0609467682903  
GCTTTCGA -0.187698850049  
GCTTTCTA -0.107647029771  
GCTTTGAA 0.0480859471474  
GCTTTGAC -0.0277498532753  
GCTTTGCA -0.162717478343  
GCTTTGCC -0.360740813886  
GCTTTGGA -0.0350065578988  
GCTTTGTA 0.0468848708583  
GCTTTTAA 0.0419054205361  
GCTTTTAC 0.0494247952754  
GCTTTTCA -0.0677345125544  
GCTTTTCC -0.0896733446441  
GCTTTTGA -0.0110302835688  
GCTTTTTA -0.0206508375596  
GGAAAAA 0.106400999521

GGAAAAAC 0.0192596574318  
GGAAAACA -0.0881045557948  
GGAAAACC -0.20601598996  
GGAAAAGA 0.108934883312  
GGAAAATA 0.262212892072  
GGAAACAA 0.080823151686  
GGAAACAC -0.159309568892  
GGAAACCA -0.0134484435165  
GGAAACCC -0.100181114679  
GGAAACGA -0.0843650872052  
GGAAACTA -0.0241352258364  
GGAAAGAA -0.0142736768701  
GGAAAGAC -0.0647175046853  
GGAAAGCA -0.109868128612  
GGAAAGCC -0.316323863405  
GGAAAGGA 0.118560864702  
GGAAAGTA -0.115225255328  
GGAAATAA 0.0674465959736  
GGAAATAC 0.129264638082  
GGAAATCA 0.448565368355  
GGAAATCC 0.489656743287  
GGAAATGA 0.0544552010274  
GGAAATTA 0.186925069705  
GGAACAAA 0.0365967351576  
GGAACAAC -0.143555218057  
GGAACACA -0.190403700002  
GGAACACC -0.216090534979  
GGAACAGA 0.0096196591751  
GGAACATA -0.0751717930141  
GGAACCAA -0.0947786668423  
GGAACCAC -0.350492858346  
GGAACCCA -0.202589684068  
GGAACCCC -0.329083240624  
GGAACCGA -0.0441169206631  
GGAACCTA -0.159135802469  
GGAACGAA -0.0314918539522  
GGAACGAC -0.0476497678783  
GGAACGCA -0.0837360751843  
GGAACGCC -0.268469595466  
GGAACGGA -0.0706299359978  
GGAACGTA -0.107670764869  
GGAACTAA -0.122916495157  
GGAACTAC -0.140016572281  
GGAACTCA -0.0986949328329  
GGAACTCC -0.323110587131  
GGAACTGA -0.128516469646  
GGAACTTA 0.0124808604169  
GGAAGAAA 0.0197683607448  
GGAAGAAC -0.220378509776  
GGAAGACA -0.230582444357  
GGAAGACC -0.401252207044  
GGAAGAGA -0.112808766155  
GGAAGATA 0.212866912556  
GGAAGCAA -0.149327299555

GGAAGCAC -0.0526358024691  
GGAAGCCA -0.28127940886  
GGAAGCCC -0.354417936022  
GGAAGCGA 0.0280941820044  
GGAAGCTA 0.017440762425  
GGAAGGAA -0.158725269241  
GGAAGGAC -0.271076252723  
GGAAGGCA -0.240256106393  
GGAAGGCC -0.293768342522  
GGAAGGGA -0.186268053909  
GGAAGGTA -0.0408074127227  
GGAAGTAA 0.00172616303322  
GGAAGTAC -0.101478941787  
GGAAGTCA -0.312219121932  
GGAAGTCC -0.392621664911  
GGAAGTGA -0.190223385517  
GGAAGTTA 0.050756177996  
GGAATAAA 0.135341548948  
GGAATAAC -0.141398747694  
GGAATACA 0.142196330249  
GGAATACC -0.0528743480598  
GGAATAGA 0.0858759606584  
GGAATATA 0.329067453111  
GGAATCAA 0.378122412215  
GGAATCAC 0.372950009879  
GGAATCCA 0.469211728029  
GGAATCCC 0.43843069458  
GGAATCGA 0.336006278952  
GGAATCTA 0.482694112417  
GGAATGAA -0.046318706951  
GGAATGAC -0.269185185185  
GGAATGCA -0.0132168445764  
GGAATGCC -0.22260080435  
GGAATGGA -0.082427033545  
GGAATGTA -0.0433132450767  
GGAATTAA 0.00927846934071  
GGAATTAC 0.262761780105  
GGAATTCA -0.0487827842537  
GGAATTCC 0.171731187043  
GGAATTGA 0.174301570468  
GGAATTTA 0.242066334091  
GGACAAAA -0.00778841544027  
GGACAAAC -0.0126347449999  
GGACAACA -0.0878353531362  
GGACAACC -0.194788734713  
GGACAAGA -0.0464600420106  
GGACAATA -0.0525844611281  
GGACACAA 0.0100523611934  
GGACACAC -0.327325696228  
GGACACCA -0.134848467241  
GGACACCC -0.298711914245  
GGACACGA -0.0298766579983  
GGACACTA -0.012084578979  
GGACAGAA 0.0374139019237

GGACAGAC -0.248192078253  
GGACAGCA -0.0999354992417  
GGACAGCC -0.215754458162  
GGACAGGA -0.148854119158  
GGACAGTA -0.135508916324  
GGACATAA 0.0885665305885  
GGACATAC -0.198251592829  
GGACATCA -0.158477683374  
GGACATCC 0.0132534443355  
GGACATGA -0.117461846199  
GGACATTA -0.0838409781905  
GGACCAAA -0.0411384416126  
GGACCAAC -0.265809729148  
GGACCACA -0.000704492635322  
GGACCACC -0.151804905253  
GGACCAGA -0.113746698857  
GGACCATA 0.133925588017  
GGACCCAA -0.239203680682  
GGACCCAC -0.265526263823  
GGACCCCA -0.187388899862  
GGACCCCC -0.211731656599  
GGACCCGA -0.243808278867  
GGACCCTA -0.0952239838001  
GGACCGAA -0.0397693599368  
GGACCGAC -0.159178588872  
GGACCGCA -0.30263526081  
GGACCGCC -0.370540087568  
GGACCGGA -0.0733313166733  
GGACCGTA -0.0702424709078  
GGACCTAA -0.13856415739  
GGACCTAC -0.217593022986  
GGACCTCA -0.0959089390263  
GGACCTCC -0.244804956075  
GGACCTGA -0.252624027788  
GGACCTTA -0.339875897031  
GGACGAAA -0.0225142154603  
GGACGAAC -0.279592428882  
GGACGACA -0.143408574533  
GGACGACC -0.137585588831  
GGACGAGA -0.104623259814  
GGACGATA -0.0136446464247  
GGACGCAA -0.0941655891796  
GGACGCAC -0.203002216954  
GGACGCCA -0.25464682935  
GGACGCCC -0.334327943718  
GGACGCGA 0.0243328229697  
GGACGCTA -0.28105970837  
GGACGGAA 0.178781979574  
GGACGGAC -0.214773707616  
GGACGGCA -0.290802234092  
GGACGGCC -0.281926298636  
GGACGGGA -0.227328976035  
GGACGGTA 0.0298446538194  
GGACGTAA -0.0173961009023

GGACGTAC -0.0760661387421  
GGACGTCA -0.243110759997  
GGACGTCC -0.221495926932  
GGACGTGA -0.0700510460518  
GGACGTTA -0.0531076423193  
GGACTAAA -0.0798978124623  
GGACTAAC -0.090488340192  
GGACTACA -0.166093193505  
GGACTACC -0.0879389685546  
GGACTAGA 0.0541681072805  
GGACTATA -0.22511641824  
GGACTCAA 0.0471261020704  
GGACTCAC -0.116415395788  
GGACTCCA -0.388033455792  
GGACTCCC -0.235221496006  
GGACTCGA -0.220732510288  
GGACTCTA -0.341345483691  
GGACTGAA 0.0227143957114  
GGACTGAC -0.172002904866  
GGACTGCA -0.267009602195  
GGACTGCC -0.243820606938  
GGACTGGA -0.196587105624  
GGACTGTA -0.172827167022  
GGACTTAA -0.129920239036  
GGACTTAC -0.0856872236201  
GGACTTCA -0.165366126696  
GGACTTGA 0.0199458426065  
GGACTTTA -0.153878655187  
GGAGAAAA -0.0641553338382  
GGAGAAAC -0.192973129993  
GGAGAAC A -0.205867825743  
GGAGAAC C -0.117225770087  
GGAGAAGA 0.0262178758993  
GGAGAAATA 0.198025656299  
GGAGACAA -0.151615168925  
GGAGACAC -0.134558815459  
GGAGACCA -0.220573469623  
GGAGACCC -0.2098296755  
GGAGACGA -0.0807883746838  
GGAGACTA -0.181310088239  
GGAGAGAA -0.0208054276292  
GGAGAGAC -0.179997095134  
GGAGAGCA -0.2632072677  
GGAGAGCC -0.464867103257  
GGAGAGGA -0.0995061728395  
GGAGAGTA -0.158326797386  
GGAGATAA 0.113888340029  
GGAGATAC 0.249728341401  
GGAGATCA 0.238413576588  
GGAGATCC 0.401199619678  
GGAGATGA -0.195443171342  
GGAGATTA 0.29783824619  
GGAGCAAA 0.0227812241222  
GGAGCAAC -0.188252723312

GGAGCACA -0.190458739441  
GGAGCACC -0.392182837458  
GGAGCAGA -0.124285181161  
GGAGCATA -0.223548076448  
GGAGCCAA -0.260395487446  
GGAGCCAC -0.123211669218  
GGAGCCCA -0.352332757344  
GGAGCCCC -0.307552614831  
GGAGCCGA -0.205368191721  
GGAGCCTA -0.246997404792  
GGAGCGAA -0.0177632821466  
GGAGCGAC -0.202896298512  
GGAGCGCA -0.111013688555  
GGAGCGCC -0.266288721473  
GGAGCGGA 0.0602896868517  
GGAGCGTA -0.138398991381  
GGAGCTAA -0.131877562108  
GGAGCTAC -0.228083144768  
GGAGCTCA -0.253215368707  
GGAGCTCC -0.299235130149  
GGAGCTGA -0.147491691264  
GGAGCTTA -0.063673941584  
GGAGGAAA -0.0156828846629  
GGAGGAAC -0.28826666202  
GGAGGACA -0.428251711427  
GGAGGACC -0.242464393091  
GGAGGAGA 0.0712160697736  
GGAGGATA 0.18576409571  
GGAGGCAA -0.0559040641036  
GGAGGCAC -0.290041272027  
GGAGGCCA -0.0759047483494  
GGAGGCCC -0.355358073452  
GGAGGCCG -0.0682207095314  
GGAGGCTA -0.289929612623  
GGAGGGAA 0.0705880173862  
GGAGGGAC -0.258849666749  
GGAGGGCA -0.229796982167  
GGAGGGCC -0.327900155372  
GGAGGGGA -0.22832312858  
GGAGGGTA -0.217867236767  
GGAGGTAA 0.0860433269666  
GGAGGTAC -0.0215348819072  
GGAGGTCA -0.162380264652  
GGAGGTGA -0.0394964318675  
GGAGGTTA -0.180929922465  
GGAGTAAA -0.0895310227491  
GGAGTAAC -0.141575290592  
GGAGTACA -0.111267851176  
GGAGTACC -0.267403285933  
GGAGTAGA 0.0794197550593  
GGAGTATA 0.0104789853704  
GGAGTCAA -0.160040497827  
GGAGTCAC -0.146693115161  
GGAGTCCA -0.31866690679



GGAGTCCC -0.148508279911  
GGAGTCGA -0.163548469566  
GGAGTCTA -0.0435968212921  
GGAGTGAA -0.0854058152472  
GGAGTGAC -0.370502259762  
GGAGTGCA -0.280875171468  
GGAGTGCC -0.319823674956  
GGAGTGGA 0.0518755138742  
GGAGTGTA -0.0670546396964  
GGAGTTAA -0.102741417634  
GGAGTTAC -0.0652805499144  
GGAGTTCA -0.109009187  
GGAGTTGA -0.171828612927  
GGAGTTTA -0.0932820426402  
GGATAAAA 0.0450582831177  
GGATAAAC -0.0570594305034  
GGATAACA 0.126468199082  
GGATAACC 0.0465369702657  
GGATAAGA 0.182407956267  
GGATAATA 0.125426010076  
GGATACAA 0.0657867592579  
GGATACAC 0.208775165207  
GGATACCA 0.21810614095  
GGATACCC 0.355584096248  
GGATACGA 0.279037328043  
GGATACTA 0.224536356947  
GGATAGAA -0.0250664119959  
GGATAGAC -0.1770521262  
GGATAGCA 0.00454578472535  
GGATAGCC 0.0182543256868  
GGATAGGA 0.200434653759  
GGATAGTA 0.0625260708248  
GGATATAA 0.198693940406  
GGATATAC 0.284705010678  
GGATATCA 0.422289731937  
GGATATCC 0.486788531206  
GGATATGA 0.326244813278  
GGATATTA 0.340166780469  
GGATCAAA 0.0168131564802  
GGATCAAC 0.00711321873148  
GGATCACA 0.177539572768  
GGATCACC 0.131726061627  
GGATCAGA 0.165494851698  
GGATCATA 0.100240949307  
GGATCCAA 0.153803654025  
GGATCCAC 0.22148949483  
GGATCCCA 0.179947693693  
GGATCCCC 0.389128760914  
GGATCCGA 0.280533052317  
GGATCCTA 0.265107356912  
GGATCGAA 0.122303255706  
GGATCGAC -0.194929379229  
GGATCGCA 0.333556578966  
GGATCGCC 0.325447096596

GGATCGGA 0.182764081182  
GGATCGTA 0.236994774858  
GGATCTAA 0.102532437595  
GGATCTAC 0.250474336437  
GGATCTCA 0.337746429765  
GGATCTGA 0.254149377593  
GGATCTTA 0.265804408439  
GGATGAAA 0.170387750062  
GGATGAAC -0.224567382302  
GGATGACA -0.174853790976  
GGATGACC -0.177174062183  
GGATGAGA 0.00757082761987  
GGATGATA 0.0250039951767  
GGATGCAA -0.0478389725858  
GGATGCAC -0.0655310764232  
GGATGCCA -0.00836612282752  
GGATGCCC -0.0547633781621  
GGATGCGA -0.0423252980307  
GGATGCTA 0.0418115683079  
GGATGGAA 0.0402129469554  
GGATGGAC -0.226406035665  
GGATGGCA -0.180021961869  
GGATGGCC -0.343995150478  
GGATGGGA 0.0320177171837  
GGATGGTA -0.0597489576221  
GGATGTAA 0.161961559136  
GGATGTAC 0.0325583437617  
GGATGTCA 0.224274693824  
GGATGTGA 0.162669616788  
GGATGTTA -0.012815868625  
GGATTAAA -0.176029731331  
GGATTAAC -0.0256742738589  
GGATTACA 0.466854563864  
GGATTACC 0.452168291372  
GGATTAGA 0.208912380074  
GGATTATA 0.247179405227  
GGATTCAA 0.0240208347055  
GGATTCAC 0.238257151639  
GGATTCCA 0.379338734111  
GGATTCCC 0.479565961931  
GGATTCGA 0.330456321822  
GGATTCTA 0.386550747547  
GGATTGAA -0.140296713429  
GGATTGAC 0.129843243793  
GGATTGCA 0.460405619398  
GGATTGCC 0.434011656624  
GGATTGGA 0.163271977104  
GGATTGTA 0.3009443145  
GGATTTAA 0.131118794764  
GGATTTAC 0.173557597313  
GGATTTCA 0.445191986402  
GGATTTGA 0.30601659751  
GGATTTTA 0.39783529825  
GGCAAAA -0.25007771667

GGCAAAAC -0.128952124167  
GGCAAACA -0.168499636892  
GGCAAACC -0.120267022257  
GGCAAAGA 0.0380849301934  
GGCAAATA 0.236618506202  
GGCAACAA -0.124976392137  
GGCAACAC -0.0682759622367  
GGCAACCA -0.240895297985  
GGCAACCC -0.186181554103  
GGCAACGA -0.108435817652  
GGCAACTA -0.12972702047  
GGCAAGAA -0.0393603125995  
GGCAAGAC -0.0582092910931  
GGCAAGCA -0.023648426182  
GGCAAGCC -0.244867173612  
GGCAAGGA -0.0547597486348  
GGCAAGTA -0.102567119602  
GGCAATAA 0.06915903752  
GGCAATAC -0.151713262804  
GGCAATCA 0.316798941799  
GGCAATGA -0.215683853669  
GGCAATTA -0.0876793564161  
GGCACAAA -0.188732792345  
GGCACAAC -0.172414833838  
GGCACACA -0.213106074323  
GGCACACC -0.288324219907  
GGCACAGA -0.0297372060858  
GGCACATA -0.0940455992749  
GGCACCAA -0.088656562047  
GGCACCCAC -0.146159122085  
GGCACCCA -0.368158426054  
GGCACCCC -0.411661628964  
GGCACCGA -0.30927654065  
GGCACCTA -0.181830778771  
GGCACGAA -0.292704778776  
GGCACGAC -0.342202026715  
GGCACGCA -0.135457096707  
GGCACGCC -0.203301688805  
GGCACGGA -0.183014281874  
GGCACGTA 0.032540768567  
GGCACTAA -0.247086707486  
GGCACTAC -0.0930509157557  
GGCACTCA -0.28270442992  
GGCACTGA -0.202595336077  
GGCACTTA -0.233022252946  
GGCAGAAA 0.0730594337019  
GGCAGAAC -0.0722241430406  
GGCAGACA -0.19191345526  
GGCAGACC -0.242263491828  
GGCAGAGA 0.0863553818663  
GGCAGATA 0.227504815766  
GGCAGCAA 0.0639558497442  
GGCAGCAC -0.222224965842  
GGCAGCCA -0.123528733929

GGCAGCCC -0.194308178019  
GGCAGCGA 0.0432123157981  
GGCAGCTA -0.323105406073  
GGCAGGAA -0.0568864740265  
GGCAGGAC -0.379771407995  
GGCAGGCA -0.0808006414894  
GGCAGGCC -0.243952666984  
GGCAGGGA -0.100527601765  
GGCAGGTA -0.250454024218  
GGCAGTAA 0.0897491029012  
GGCAGTAC -0.0212727422409  
GGCAGTCA -0.0508896819125  
GGCAGTGA -0.244049382716  
GGCAGTTA -0.0540910358612  
GGCATAAA -0.0327793354932  
GGCATAAC -0.141960784314  
GGCATAACA 0.0917500933061  
GGCATAACC -0.157261827095  
GGCATAGA -0.0924269800211  
GGCATATA -0.141253772291  
GGCATCAA -0.164938356954  
GGCATCAC -0.0372593251224  
GGCATCCA 0.0839757093255  
GGCATCCC -0.00328992498203  
GGCATCGA -0.08257041867  
GGCATCTA 0.0454912614589  
GGCATGAA 0.164434210335  
GGCATGAC -0.374444554162  
GGCATGCA -0.0964505029552  
GGCATGCC -0.233935624013  
GGCATGGA 0.00631874464862  
GGCATGTA -0.124793199664  
GGCATTAA -0.043252870535  
GGCATTAC -0.147855923786  
GGCATTCA -0.0636308166141  
GGCATTGA 0.0897451230705  
GGCATTTA 0.02329841791  
GGCCAAAA 0.00654014445846  
GGCCAAAC -0.147064633261  
GGCCAACA -0.2334255053  
GGCCAACC -0.347631586165  
GGCCAAGA 0.0487556840469  
GGCCAATA -0.0836162830897  
GGCCACAA -0.109047807191  
GGCCACAC -0.320973508645  
GGCCACCA -0.303665035503  
GGCCACCC -0.268423376065  
GGCCACGA -0.165146528712  
GGCCACTA -0.315141289438  
GGCCAGAA 0.0497678324442  
GGCCAGAC -0.328769998025  
GGCCAGCA -0.194670678858  
GGCCAGCC -0.354044966623  
GGCCAGGA 0.0160322155139

GGCCAGTA -0.145618655693  
GGCCATAA -0.069792198243  
GGCCATAC -0.347209191316  
GGCCATCA -0.360222397771  
GGCCATGA -0.0930983581369  
GGCCATTA -0.249731138546  
GGCCAAA -0.240494296578  
GGCCAAC -0.3725136858  
GGCCACA -0.27678468553  
GGCCACC -0.265800854485  
GGCCAGA -0.182517340533  
GGCCATA -0.000872210162353  
GGCCCAA -0.127618502584  
GGCCCAC -0.332022206862  
GGCCCCA -0.237173380116  
GGCCCCC -0.335442229224  
GGCCCCGA -0.14940928843  
GGCCCCTA -0.398820102686  
GGCCCGAA -0.125965552402  
GGCCCGAC -0.311814950133  
GGCCCGCA -0.195387330898  
GGCCCGCC -0.234979878531  
GGCCCGGA -0.302368284614  
GGCCCGTA -0.0891770987128  
GGCCCTAA -0.152927231738  
GGCCCTAC -0.280811472082  
GGCCCTCA -0.276136812481  
GGCCCTGA -0.0327788365445  
GGCCCTTA -0.236990275362  
GGCCGAAA 0.0817965220171  
GGCCGAAC -0.275942658701  
GGCCGACA -0.219856136844  
GGCCGACC -0.203452230068  
GGCCGAGA 0.00671122525133  
GGCCGATA 0.1325605392  
GGCCGCAA 0.00700001097611  
GGCCGCAC -0.351387380271  
GGCCGCCA -0.169549404037  
GGCCGCCC -0.226548125201  
GGCCGCGA -0.0790342214823  
GGCCGCTA -0.210877262305  
GGCCGGAA -0.12671508862  
GGCCGGAC -0.387309032063  
GGCCGGCA -0.122774814522  
GGCCGGCC -0.215706559548  
GGCCGGGA -0.0569576837172  
GGCCGGTA -0.31682386055  
GGCCGTAA -0.104153411253  
GGCCGTAC -0.123848107452  
GGCCGTCA -0.164310820625  
GGCCGTGA -0.0638714813233  
GGCCGTTA -0.0590871173455  
GGCCTAAA -0.109748231226  
GGCCTAAC -0.314421102466

GGCCTACA -0.387810105774  
GGCCTACC -0.194103959907  
GGCCTAGA -0.0811667087935  
GGCCTATA -0.0719507978066  
GGCCTCAA -0.292277505541  
GGCCTCAC -0.202332957674  
GGCCTCCA -0.225112410656  
GGCCTCCC -0.216312695333  
GGCCTCGA -0.288139433551  
GGCCTCTA -0.144688101941  
GGCCTGAA -0.212354396765  
GGCCTGAC -0.272702582589  
GGCCTGCA -0.239531898084  
GGCCTGGA -0.141054466231  
GGCCTGTA -0.311365681304  
GGCCTTAA -0.260380903867  
GGCCTTAC -0.3380871606  
GGCCTTCA -0.210675144583  
GGCCTTGA -0.232222373913  
GGCCTTTA -0.311573091041  
GGCGAAAA 0.111055743611  
GGCGAAAC -0.0215525756902  
GGCGAACA -0.264927400237  
GGCGAACC -0.192116713029  
GGCGAAGA 0.0331417963995  
GGCGAATA 0.211675887506  
GGCGACAA -0.218904320988  
GGCGACAC -0.0896038237473  
GGCGACCA -0.0524851418317  
GGCGACCC -0.339991440752  
GGCGACGA -0.0596990352004  
GGCGACTA -0.285390409188  
GGCGAGAA 0.0335897867988  
GGCGAGAC -0.199795346183  
GGCGAGCA -0.1065708061  
GGCGAGCC -0.179723552878  
GGCGAGGA -0.0576773901144  
GGCGAGTA 0.00965961094243  
GGCGATAA -0.102810021679  
GGCGATAC -0.0449537285895  
GGCGATCA 0.207744831694  
GGCGATGA -0.210247693988  
GGCGATTA 0.190709455751  
GGCGCAAA -0.0158373400075  
GGCGCAAC -0.166578543705  
GGCGCACA -0.120818517055  
GGCGCACC -0.104935185185  
GGCGCAGA -0.034254319524  
GGCGCATA 0.00175642497058  
GGCGCCAA -0.0910230870966  
GGCGCCAC -0.258736842105  
GGCGCCCA -0.131202112011  
GGCGCCCC -0.179808470208  
GGCGCCGA -0.155313508529

GGCGCCTA -0.0697475670602  
GGCGCGAA 0.0383725829181  
GGCGCGAC -0.110122297445  
GGCGCGCA -0.0237239844648  
GGCGCGCC -0.0369566486055  
GGCGCGGA 0.00728393698683  
GGCGCGTA -0.0270395617906  
GGCGCTAA -0.169155252645  
GGCGCTAC -0.385835692497  
GGCGCTCA -0.16790891953  
GGCGCTGA -0.0899063235706  
GGCGCTTA -0.201177952289  
GGCGGAAA 0.00367120421891  
GGCGGAAC -0.290413018193  
GGCGGACA -0.163276688453  
GGCGGACC -0.242265892021  
GGCGGAGA -0.204365863295  
GGCGGATA 0.154026433072  
GGCGGCAA -0.0539231824417  
GGCGGCAC -0.268032584547  
GGCGGCCA -0.275771234731  
GGCGGCCC -0.212336008318  
GGCGGCGA -0.158076393347  
GGCGGCTA -0.233590329806  
GGCGGGAA 0.00927343672824  
GGCGGGAC -0.138683268645  
GGCGGGCA -0.108361732602  
GGCGGGGA 0.0544953324113  
GGCGGGTA -0.0628143477692  
GGCGGTAA 0.0356732962387  
GGCGGTAC -0.342047177319  
GGCGGTCA -0.200661631852  
GGCGGTGA 0.0147985335924  
GGCGGTTA -0.13979981562  
GGCGTAAA 0.109228523129  
GGCGTAAC -0.149710965868  
GGCGTACA -0.0816236360842  
GGCGTACC -0.158908819318  
GGCGTAGA -0.155257569023  
GGCGTATA -0.154612754702  
GGCGTCAA -0.139752364794  
GGCGTCAC -0.170673642562  
GGCGTCCA -0.280564882481  
GGCGTCCC -0.366634298348  
GGCGTCGA -0.107494484507  
GGCGTCTA -0.287374435612  
GGCGTGAA -0.080165577342  
GGCGTGAC -0.185162969439  
GGCGTGCA -0.0493409499978  
GGCGTGGA -0.234851976211  
GGCGTGTA -0.0383304519634  
GGCGTTAA -0.00495547193933  
GGCGTTAC -0.185651961753  
GGCGTTCA -0.263605155699

GGCGTTGA -0.0945704932509  
GGCGTTTA 0.00173439592527  
GGCTAAAA -0.00233754158616  
GGCTAAAC 0.00449057864687  
GGCTAACA 0.0357691804803  
GGCTAACC -0.34957623632  
GGCTAAGA -0.15503848947  
GGCTAATA -0.196595038825  
GGCTACAA -0.127965999385  
GGCTACAC -0.304777451174  
GGCTACCA -0.2754913095  
GGCTACCC -0.386859211717  
GGCTACGA -0.117169921082  
GGCTACTA -0.184487356776  
GGCTAGAA -0.0961757938932  
GGCTAGAC -0.0853602742966  
GGCTAGCA -0.113034673516  
GGCTAGCC -0.0646490582299  
GGCTAGGA 0.00209918008496  
GGCTAGTA -0.272907100183  
GGCTATAA 0.0763638496493  
GGCTATAC -0.0929016605407  
GGCTATCA -0.0141907615974  
GGCTATGA -0.0406575011663  
GGCTATTA -0.0800859386576  
GGCTCAAA -0.212143192256  
GGCTCAAC -0.342761130522  
GGCTCACA -0.243349794239  
GGCTCACC -0.276672756901  
GGCTCAGA -0.173557607884  
GGCTCATA -0.261371590556  
GGCTCCAA -0.112419494935  
GGCTCCAC -0.15163909923  
GGCTCCCA -0.306948241629  
GGCTCCCC -0.365980159836  
GGCTCCGA -0.168147106751  
GGCTCCTA -0.283533361992  
GGCTCGAA -0.226272033773  
GGCTCGAC -0.269358440461  
GGCTCGCA -0.321885904273  
GGCTCGGA -0.0336068050294  
GGCTCGTA -0.0451454970726  
GGCTCTAA -0.220631084178  
GGCTCTAC -0.205332452718  
GGCTCTCA -0.299461016634  
GGCTCTGA -0.175564225394  
GGCTCTTA -0.226043034239  
GGCTGAAA -0.0627754452403  
GGCTGAAC -0.0423542194436  
GGCTGACA -0.0376965505886  
GGCTGACC -0.277002654523  
GGCTGAGA -0.0365704142081  
GGCTGATA 0.105589584843  
GGCTGCAA -0.0111548842385



GGCTGCAC -0.308329848527  
GGCTGCCA -0.336836243739  
GGCTGCCC -0.271239631678  
GGCTGCGA -0.18428582402  
GGCTGCTA -0.277935293827  
GGCTGGAA 0.00392434521065  
GGCTGGAC -0.0737458242556  
GGCTGGCA -0.232646432725  
GGCTGGGA -0.0587843117888  
GGCTGGTA -0.116003468278  
GGCTGTAA -0.0985657660772  
GGCTGTAC -0.226990969219  
GGCTGTCA -0.146802859949  
GGCTGTGA -0.0388205014883  
GGCTGTTA -0.230023499203  
GGCTTAAA -0.0735353834672  
GGCTTAAC -0.196277272927  
GGCTTACA -0.0677268092005  
GGCTTACC -0.34265911223  
GGCTTAGA -0.0347717712134  
GGCTTATA -0.252231934636  
GGCTTCAA -0.213596533266  
GGCTTCAC -0.243328122  
GGCTTCCA -0.235339140841  
GGCTTCCC -0.411339248116  
GGCTTCGA -0.127644647666  
GGCTTCTA -0.299575617284  
GGCTTGAA -0.198964843012  
GGCTTGAC -0.208859693203  
GGCTTGCA -0.173305898491  
GGCTTGGA -0.109188559664  
GGCTTGTA -0.243738979122  
GGCTTTAA -0.13415704933  
GGCTTTAC -0.107175788711  
GGCTTTCA -0.210677070473  
GGCTTTGA -0.0233731805309  
GGCTTTTA -0.113069312684  
GGGAAAAA 0.0222782058882  
GGGAAAAC -0.0758691325382  
GGGAAACA -0.111706623636  
GGGAAACC -0.0790240529461  
GGGAAAGA 0.0521169509759  
GGGAAATA 0.197200470704  
GGGAACAA -0.030794822251  
GGGAACAC -0.305750214181  
GGGAACCA -0.287938460824  
GGGAACCC -0.286803917696  
GGGAACGA 0.00166021788645  
GGGAACTA -0.112303294571  
GGGAAGAA -0.017045049198  
GGGAAGAC -0.16059473638  
GGGAAGCA -0.10946324401  
GGGAAGGA -0.195958847737  
GGGAAGTA -0.0956034888518

GGGAATAA 0.0320035448114  
GGGAATAC 0.128600518123  
GGGAATCA 0.454348613581  
GGGAATGA -0.0631592523077  
GGGAATTA 0.242571187073  
GGGACAAA 0.0856115525983  
GGGACAAC -0.0591881080547  
GGGACACA -0.126788154148  
GGGACACC -0.312950506048  
GGGACAGA -0.0627870228631  
GGGACATA -0.178658168127  
GGGACCAA -0.280622188144  
GGGACCAC -0.179050142928  
GGGACCCA -0.273454687097  
GGGACCCC -0.233390854185  
GGGACCGA -0.297815197055  
GGGACCTA -0.193828874893  
GGGACGAA -0.203354995018  
GGGACGAC -0.120256047236  
GGGACGCA -0.231493288639  
GGGACGGA 0.017877739331  
GGGACGTA -0.233000839465  
GGGACTAA -0.285406911175  
GGGACTAC -0.112739618482  
GGGACTCA -0.215002084842  
GGGACTGA -0.0777906589865  
GGGACTTA -0.15071967738  
GGGAGAAA -0.00435692182529  
GGGAGAAC -0.224024691358  
GGGAGACA -0.24985510787  
GGGAGACC -0.218032513702  
GGGAGAGA -0.0590327003974  
GGGAGATA 0.229976900615  
GGGAGCAA 0.145408352267  
GGGAGCAC -0.379175645769  
GGGAGCCA -0.217719942274  
GGGAGCCC -0.320285477805  
GGGAGCGA 0.0928435488792  
GGGAGCTA -0.0858097312999  
GGGAGGAA 0.0677828948324  
GGGAGGAC -0.324001382511  
GGGAGGCA -0.266848276354  
GGGAGGGA 0.211051385237  
GGGAGGTA 0.0171269594526  
GGGAGTAA -0.0889657467123  
GGGAGTAC -0.19428700909  
GGGAGTCA -0.151726712116  
GGGAGTGA -0.0346241232836  
GGGAGTTA -0.0830520845338  
GGGATAAA -0.148900872213  
GGGATAAC 0.0273458951375  
GGGATACA 0.0397456585216  
GGGATACC 0.200986849327  
GGGATAGA -0.0589571862333

GGGATATA 0.104227623378  
GGGATCAA 0.108289973435  
GGGATCAC 0.120131616501  
GGGATCCA 0.205394214984  
GGGATCCC 0.265044150457  
GGGATCGA 0.113998111923  
GGGATCTA 0.265975622158  
GGGATGAA 0.031617102262  
GGGATGAC -0.203307707925  
GGGATGCA -0.0434869850835  
GGGATGGA -0.174287689497  
GGGATGTA 0.00110847994421  
GGGATTAA -0.125746301418  
GGGATTAC 0.429995786905  
GGGATTCA 0.0710051864658  
GGGATTGA 0.0272398954972  
GGGATTTA 0.202633427737  
GGGCAAAA -0.0808947004494  
GGGCAAAC -0.0793402908926  
GGGCAACA -0.163476651588  
GGGCAACC -0.301092648584  
GGGCAAGA -0.114271938284  
GGGCAATA 0.0519742475137  
GGGCACAA -0.0711428289214  
GGGCACAC -0.306740946428  
GGGCACCA -0.193826303421  
GGGCACCC -0.366465128706  
GGGCACGA -0.144680384088  
GGGCACTA -0.261436456207  
GGGCAGAA 0.155192759446  
GGGCAGAC -0.334332844468  
GGGCAGCA -0.082779417575  
GGGCAGGA -0.253327523602  
GGGCAGTA -0.037842101135  
GGGCATAA -0.0326807675211  
GGGCATAC -0.0433249972704  
GGGCATCA -0.109470408871  
GGGCATGA -0.111177923021  
GGGCATTA -0.114358750908  
GGGCCAAA -0.18995945208  
GGGCCAAC -0.254046439408  
GGGCCACA -0.146428498811  
GGGCCACC -0.43758638989  
GGGCCAGA -0.122986670179  
GGGCCATA -0.0938887516808  
GGGCCCAA -0.345557091755  
GGGCCCAC -0.223448499114  
GGGCCCCA -0.212431693989  
GGGCCCCC -0.0986617900508  
GGGCCCGA -0.20471259069  
GGGCCCTA -0.210611796982  
GGGCCGAA -0.314177569324  
GGGCCGAC -0.325521854424  
GGGCCGCA -0.265562690785

GGGCCGGA -0.19093539055  
GGGCCGTA 0.0189849067002  
GGGCCTAA -0.120572224793  
GGGCCTAC -0.292363442842  
GGGCCTCA -0.341704470867  
GGGCCTGA -0.266710487335  
GGGCCTTA -0.152492760103  
GGGCGAAA -0.098796045311  
GGGCGAAC -0.339705503163  
GGGCGACA -0.161420606699  
GGGCGACC -0.297481149284  
GGGCGAGA -0.110334789783  
GGGCGATA 0.0682149992316  
GGGCGCAA -0.077467203231  
GGGCGCAC -0.233508616008  
GGGCGCCA -0.156412240552  
GGGCGCCC -0.109867000624  
GGGCGCGA -0.0403821626443  
GGGCGCTA -0.368587369772  
GGGCGGAA 0.0197221237601  
GGGCGGAC -0.292616128114  
GGGCGGCA -0.177856233678  
GGGCGGGA 0.0732018072727  
GGGCGGTA -0.0629376318343  
GGGCGTAA 0.00395846588747  
GGGCGTAC -0.203050388633  
GGGCGTCA -0.149138692701  
GGGCGTGA -0.17479157589  
GGGCGTTA -0.179256259124  
GGGCTAAA 0.0103666083642  
GGGCTAAC -0.182644037465  
GGGCTACA -0.299351181176  
GGGCTACC -0.245276186714  
GGGCTAGA -0.0517838914683  
GGGCTATA -0.0788116247421  
GGGCTCAA -0.33464795339  
GGGCTCAC -0.209647736489  
GGGCTCCA -0.235401920439  
GGGCTCGA -0.274400887595  
GGGCTCTA -0.187968046478  
GGGCTGAA -0.169947390285  
GGGCTGAC -0.143736146773  
GGGCTGCA -0.107854273673  
GGGCTGGA -0.0414251684999  
GGGCTGTA -0.0835116950399  
GGGCTTAA -0.262208067941  
GGGCTTAC -0.27650878146  
GGGCTTCA -0.316067180415  
GGGCTTGA -0.304223659737  
GGGCTTTA -0.297067748804  
GGGGAAAA 0.000979714153988  
GGGGAAAC -0.0532956576061  
GGGGAAACA -0.000288151221761  
GGGGAAACC -0.136858832826

GGGAAGA -0.135811919381  
GGGAATA 0.27239072208  
GGGACAA -0.111390424099  
GGGACAC -0.25017065243  
GGGACCA -0.0444379559499  
GGGACCC -0.251869914921  
GGGACGA -0.0254645636449  
GGGACTA -0.325750626876  
GGGAGAA -0.0382421219006  
GGGAGAC -0.318898289578  
GGGAGCA -0.0927361824487  
GGGAGGA -0.0887959608753  
GGGAGTA -0.0970185891533  
GGGATAA -0.0151395406273  
GGGATAC 0.148395391745  
GGGATCA 0.241959208764  
GGGATGA -0.1341111111111  
GGGATTA 0.206167100083  
GGGCAAA -0.0417163012592  
GGGCAAC -0.16072643663  
GGGCACA -0.0699624049834  
GGGCACC -0.276905435951  
GGGCAGA 0.165096683277  
GGGCATA -0.0973304237246  
GGGCCAA -0.020183310008  
GGGCCAC -0.367189632839  
GGGCCCA -0.301560262677  
GGGCCCC -0.154473642872  
GGGCCGA -0.0104156376568  
GGGCCTA -0.388193183963  
GGGCGAA 0.0116110157206  
GGGCGAC -0.265786600387  
GGGCGCA -0.211336132378  
GGGCGGA -0.189761940723  
GGGCGTA 0.0383204919247  
GGGCTAA 0.0526506181628  
GGGCTAC -0.179312537033  
GGGCTCA -0.259471572936  
GGGCTGA -0.165720742178  
GGGCTTA -0.324084060826  
GGGGAAA -0.0611610709979  
GGGGAAC -0.206210554137  
GGGGACA -0.238113267596  
GGGGACC -0.305532641656  
GGGGAGA -0.0162682053115  
GGGGATA 0.115779042774  
GGGGCAA 0.00784281441234  
GGGGCAC -0.348799656132  
GGGGCCA -0.157387505664  
GGGGCGA 0.0741564029946  
GGGGGCTA -0.234283324232  
GGGGGAA -0.100748459458  
GGGGGAC -0.328179488912  
GGGGGCA -0.255989671828

GGGGGGGA -0.00900633901375  
GGGGGGTA -0.243698216735  
GGGGGTAA -0.285776737242  
GGGGGTAC -0.38256671878  
GGGGGTCA -0.327305364176  
GGGGGTGA -0.00715209274621  
GGGGGTTA -0.323302701747  
GGGGTAAA 0.068204548822  
GGGGTAAC -0.210328908567  
GGGGTACA -0.109368998628  
GGGGTACC -0.259298765432  
GGGGTAGA 0.0446180843059  
GGGGTATA -0.148403689851  
GGGGTCAA -0.29695060235  
GGGGTCAC -0.207859100336  
GGGGTCCA -0.16556480871  
GGGGTCGA -0.241250250532  
GGGGTCTA -0.193916245479  
GGGGTGAA 0.097071285868  
GGGGTGAC -0.208552056311  
GGGGTGCA -0.093816367857  
GGGGTGGA 0.094205165355  
GGGGTGTA -0.0801527604671  
GGGGTTAA -0.0902603854937  
GGGGTTAC -0.184853820029  
GGGGTTCA -0.231052175884  
GGGGTTGA -0.141050967997  
GGGGTTTA -0.270437587228  
GGGTAAAA 0.0860968407649  
GGGTAAAC -0.119910768674  
GGGTAACA -0.105772608032  
GGGTAAAC -0.0999668796249  
GGGTAAAGA -0.0415629131376  
GGGTAAATA 0.143046499374  
GGGTACAA -0.14739453005  
GGGTACAC -0.0750592621858  
GGGTACCA -0.13971052184  
GGGTACCC -0.28888971169  
GGGTACGA 0.0763759792209  
GGGTACTA -0.170281849046  
GGGTAGAA 0.133457789142  
GGGTAGAC -0.0475991285403  
GGGTAGCA -0.156911641255  
GGGTAGGA -0.115174529755  
GGGTAGTA -0.160836043286  
GGGTATAA 0.120238838929  
GGGTATAC -0.204590576847  
GGGTATCA 0.205318669824  
GGGTATGA -0.0895483582341  
GGGTATTA 0.0322563305391  
GGGTCAAA -0.107315393934  
GGGTCAAC -0.34202470727  
GGGTCACA -0.0548779424839  
GGGTCACC -0.139782135076

GGGTCAGA -0.074504816004  
GGGTCATA -0.121261068631  
GGGTCCAA -0.328379823912  
GGGTCCAC -0.174852476421  
GGGTCCCA -0.264811248814  
GGGTCCGA -0.175907099952  
GGGTCCTA -0.35265946015  
GGGTCGAA -0.20931573459  
GGGTCGAC -0.154210017999  
GGGTCGCA -0.128708551483  
GGGTCGGA -0.238697961244  
GGGTCGTA -0.193922166507  
GGGTCTAA -0.137461147422  
GGGTCTAC -0.217917805672  
GGGTCTCA -0.152281724114  
GGGTCTGA -0.115101851852  
GGGTCTTA -0.246297850861  
GGGTGAAA 0.094375703622  
GGGTGAAC -0.104641165142  
GGGTGACA -0.153445433666  
GGGTGACC -0.133026936575  
GGGTGAGA -0.0776586782861  
GGGTGATA 0.0117428483611  
GGGTGCAA -0.0415575862353  
GGGTGCAC -0.235598028886  
GGGTGCCA -0.247830568311  
GGGTGCGA -0.0222905323346  
GGGTGCTA -0.114307270233  
GGGTGGAA -0.0314845679012  
GGGTGGAC -0.133442771249  
GGGTGGCA 0.0169378032449  
GGGTGGGA 0.0603031899712  
GGGTGGTA -0.0760487809129  
GGGTGTAA 0.017943994747  
GGGTGTAC -0.189477292003  
GGGTGTCA -0.251586213308  
GGGTGTGA -0.183783226391  
GGGTGTTA -0.0108229741226  
GGGTTAAA -0.187197334364  
GGGTTAAC -0.180058274483  
GGGTTACA -0.0979588278878  
GGGTTACC -0.177181255934  
GGGTTAGA 0.0714400375383  
GGGTTATA -0.11304606802  
GGGTTCAA -0.232951989026  
GGGTTCAC -0.0488628506519  
GGGTTCOA -0.162937903332  
GGGTTCGA -0.216357086979  
GGGTTCOA -0.262048323996  
GGGTTGAA -0.0651312387051  
GGGTTGAC -0.198753299203  
GGGTTGCA 0.0246822103669  
GGGTTGGA -0.0401723967595  
GGGTTGTA -0.237031857597

GGGTTTAA -0.249406006332  
GGGTTTAC 0.0266879151147  
GGGTTTCA 0.0680124358956  
GGGTTTGA -0.0910124828241  
GGGTTTTA 0.0165892774814  
GGTAAAAA 0.207474368263  
GGTAAAAC -0.115420369343  
GGTAAACA 0.144671123406  
GGTAAACC -0.191157425699  
GGTAAAGA 0.191217875147  
GGTAAATA 0.0479697238243  
GGTAACAA -0.0113800389671  
GGTAACAC -0.101700553777  
GGTAACCA -0.0871922413142  
GGTAACGA 0.0996920081937  
GGTAACTA -0.0136402597591  
GGTAAGAA 0.00689367494347  
GGTAAGAC -0.170439193606  
GGTAAGCA -0.1946111111111  
GGTAAGGA 0.111506108988  
GGTAAGTA 0.0891512437156  
GGTAATAA 0.209008760333  
GGTAATAC 0.0666013523897  
GGTAATCA 0.334073772754  
GGTAATGA -0.0194470913612  
GGTAATTA 0.102391469956  
GGTACAAA -0.0288655960211  
GGTACAAC -0.330085368798  
GGTACACA -0.0976228104833  
GGTACACC -0.124872427984  
GGTACAGA -0.0645465994962  
GGTACATA -0.170513411475  
GGTACCAA 0.0833803498025  
GGTACCAC -0.0516314690048  
GGTACCCA -0.264879707045  
GGTACCGA -0.137074319742  
GGTACCTA -0.173868235208  
GGTACGAA 0.1217379887  
GGTACGAC -0.226927762413  
GGTACGCA -0.0570050835149  
GGTACGGA 0.0452347885712  
GGTACGTA 0.11703604909  
GGTACTAA -0.0230273990647  
GGTACTAC -0.178909907092  
GGTACTCA -0.180923218754  
GGTACTGA -0.0928615337329  
GGTACTTA -0.0483648831229  
GGTAGAAA 0.277298679412  
GGTAGAAC -0.0158592943863  
GGTAGACA -0.202695557951  
GGTAGACC -0.228941176471  
GGTAGAGA 0.0480772303982  
GGTAGATA 0.268552822235  
GGTAGCAA -0.0825375657194



GGTAGCAC -0.245837848202  
GGTAGCCA -0.128346009482  
GGTAGCGA -0.141210105799  
GGTAGCTA -0.0576586578336  
GGTAGGAA 0.00307086873477  
GGTAGGAC -0.0336315256581  
GGTAGGCA -0.198684806729  
GGTAGGGA -0.209667766751  
GGTAGGTA -0.00469822689781  
GGTAGTAA -0.1435089024  
GGTAGTAC -0.123342891757  
GGTAGTCA 0.000555665316606  
GGTAGTGA -0.062273568488  
GGTAGTTA -0.104898426357  
GGTATAAA 0.169503688085  
GGTATAAC 0.0183850769253  
GGTATACA -0.0475951353903  
GGTATACC -0.1193333333333  
GGTATAGA 0.189009557443  
GGTATATA 0.0373279325561  
GGTATCAA 0.0865616782648  
GGTATCAC 0.135911326264  
GGTATCCA 0.339573865507  
GGTATCGA 0.172802289599  
GGTATCTA 0.356336033722  
GGTATGAA -0.0086775238621  
GGTATGAC -0.143055523276  
GGTATGCA 0.0137971612453  
GGTATGGA -0.128518353885  
GGTATGTA -0.0507168761618  
GGTATTAA 0.0672933040838  
GGTATTAC 0.0921397130132  
GGTATTCA -0.0293216960794  
GGTATTGA 0.0653182256635  
GGTATTTA 0.12227618644  
GGTCAAAA 0.00269215570045  
GGTCAAAC -0.07364966468  
GGTCAACA -0.215301095091  
GGTCAACC -0.305487188417  
GGTCAAGA -0.192932336605  
GGTCAATA -0.0919962242199  
GGTCACAA -0.00626298432438  
GGTCACAC -0.167739474955  
GGTCACCA -0.306704848425  
GGTCACGA -0.146000702401  
GGTCACTA -0.217695858157  
GGTCAGAA 0.0241251180048  
GGTCAGAC -0.289391969365  
GGTCAGCA -0.162482233308  
GGTCAGGA 0.0421114410399  
GGTCAGTA -0.0544695131696  
GGTCATAA 0.00358403672657  
GGTCATAC -0.0481243654126  
GGTCATCA -0.214525181863

GGTCATGA -0.0036795574653  
GGTCATTA -0.151024160961  
GGTCCAAA -0.0611152273538  
GGTCCAAC -0.356387289029  
GGTCCACA -0.10400819915  
GGTCCACC -0.226976445608  
GGTCCAGA -0.190858450618  
GGTCCATA -0.207012835921  
GGTCCCAA -0.172557653517  
GGTCCCAC -0.286106027596  
GGTCCCCA -0.230345204143  
GGTCCCGA -0.00532448099022  
GGTCCCTA -0.168966238414  
GGTCCGAA 0.0240483232708  
GGTCCGAC -0.24244170096  
GGTCCGCA -0.192611615962  
GGTCCGGA -0.19870549629  
GGTCCGTA -0.121627117856  
GGTCCTAA -0.176435726404  
GGTCCTAC -0.148404320988  
GGTCCTCA -0.175761871013  
GGTCCTGA -0.109229794935  
GGTCCTTA -0.245841684822  
GGTCGAAA -0.180310820625  
GGTCGAAC -0.148203025963  
GGTCGACA -0.0909571532317  
GGTCGACC -0.195581337941  
GGTCGAGA 0.026721223298  
GGTCGATA 0.102867241871  
GGTCGCAA -0.0664397630441  
GGTCGCAC -0.160117322973  
GGTCGCCA -0.0838632554113  
GGTCGCGA -0.0360216397139  
GGTCGCTA -0.309848684355  
GGTCGGAA -0.0297807190834  
GGTCGGAC -0.315199491143  
GGTCGGCA -0.168108366625  
GGTCGGGA -0.132200617284  
GGTCGGTA -0.204353027036  
GGTCGTAA 0.105090122725  
GGTCGTAC -0.145953336522  
GGTCGTCA -0.138421101728  
GGTCGTGA -0.134057623642  
GGTCGTTA -0.196492899807  
GGTCTAAA -0.0681286592187  
GGTCTAAC 0.136509583086  
GGTCTACA -0.00669882178606  
GGTCTAGA -0.100372820017  
GGTCTATA -0.307032218901  
GGTCTCAA -0.157656296752  
GGTCTCAC -0.126527510275  
GGTCTCCA -0.164839415938  
GGTCTCGA -0.182639984428  
GGTCTCTA -0.200390161991

GGTCTGAA -0.0424949590624  
GGTCTGAC -0.30869790638  
GGTCTGCA -0.229423384168  
GGTCTGGA -0.132401600079  
GGTCTGTA -0.180919170295  
GGTCTTAA -0.120557734205  
GGTCTTAC -0.197588787919  
GGTCTTCA -0.346393689986  
GGTCTTGA -0.149194722286  
GGTCTTTA -0.16554721454  
GGTGAAAA 0.205925635112  
GGTGAAAC -0.126195892492  
GGTGAAACA -0.207827160494  
GGTGAAACC -0.16327605504  
GGTGGAAGA 0.104126874355  
GGTGGAATA 0.0655749851808  
GGTGACAA -0.0441648627838  
GGTGACAC -0.185152041652  
GGTGACCA -0.320517330766  
GGTGACGA -0.0737182466823  
GGTGACTA -0.248361272961  
GGTGAGAA -0.0857569541696  
GGTGAGAC -0.208071514987  
GGTGAGCA -0.148534141175  
GGTGAGGA -0.0670538296483  
GGTGAGTA 0.0803262969796  
GGTGATAA -0.0877152974875  
GGTGATAC 0.105756986981  
GGTGATCA -0.00262078845964  
GGTGATGA 0.087575726759  
GGTGATTA 0.167149397973  
GGTGCAAA 0.0147643197436  
GGTGCAAC -0.259610748003  
GGTGCAACA -0.241383266386  
GGTGCAACC -0.218477920966  
GGTGCAAGA 0.0880946892358  
GGTGCAATA -0.0375299638255  
GGTGCCAA -0.172916921173  
GGTGCCAC -0.306028736483  
GGTGCCCA -0.214305426848  
GGTGCCGA -0.0969957817185  
GGTGCCTA -0.238558864194  
GGTGCGAA -0.0298111012326  
GGTGCGAC -0.247493348515  
GGTGCGCA -0.0631394348144  
GGTGCGGA 0.113647523717  
GGTGCGTA -0.0632352214852  
GGTGCTAA -0.0261531537465  
GGTGCTAC -0.185905878221  
GGTGCTCA -0.166267692379  
GGTGCTGA -0.039479112795  
GGTGCTTA -0.22386677859  
GGTGGA AAA 0.0734233632206  
GGTGGAAC -0.288047676857

GGTGGACA -0.0581431723139  
GGTGGAGA -0.108068770772  
GGTGGATA 0.285862022128  
GGTGGCAA -0.0686129223474  
GGTGGCAC -0.216847471206  
GGTGGCCA -0.340431367386  
GGTGGCGA -0.0547625272331  
GGTGGCTA -0.0398899096667  
GGTGGGAA 0.107233418955  
GGTGGGAC -0.181687984592  
GGTGGGCA -0.167195352215  
GGTGGGGA -0.0444081910152  
GGTGGGTA -0.154858538459  
GGTGGTAA 0.130584436432  
GGTGGTAC -0.237593205274  
GGTGGTCA -0.260845697157  
GGTGGTGA 0.0351129222579  
GGTGGTTA -0.187569951939  
GGTGTAAC -0.0570339554233  
GGTGTAAC 0.0354176049279  
GGTGTAACA -0.254486746882  
GGTGTAGA 0.117782497969  
GGTGTTAA 0.0986218138708  
GGTGTTAC -0.190058335117  
GGTGTTAC -0.258889821627  
GGTGTTCA -0.246528436542  
GGTGTTCA -0.289845768933  
GGTGTTCA -0.348513801966  
GGTGTTGA 0.0708163235657  
GGTGTTGA -0.0670556858097  
GGTGTTGA -0.339930761297  
GGTGTTGA 0.00103180483521  
GGTGTTGA -0.00343875757268  
GGTGTTAA 0.0957814661134  
GGTGTTAC -0.187800756522  
GGTGTTCA -0.219994182952  
GGTGTTGA 0.0689567503959  
GGTGTTTA -0.0852192988828  
GGTTAAAA 0.198817050282  
GGTTAAAC -0.184887852123  
GGTTAACA 0.0199885162501  
GGTTAACC -0.0784703643187  
GGTTAAGA 0.122220026784  
GGTTAATA -0.051326593339  
GGTTACAA -0.0159184331426  
GGTTACAC -0.146364492063  
GGTTACCA -0.170151868855  
GGTTACGA 0.0459422819381  
GGTTACTA -0.0943570552789  
GGTTAGAA -0.0148671342487  
GGTTAGAC 0.000948672874929  
GGTTAGCA -0.110851906942  
GGTTAGGA 0.0142852992024  
GGTTAGTA -0.0578342761019

GGTTATAA -0.0733514448012  
GGTTATAC -0.0650481262293  
GGTTATCA 0.0309845154598  
GGTTATGA -0.172401398287  
GGTTATTA 0.0238847996838  
GGTTCAAA 0.0198677314014  
GGTTC AAC -0.219069647482  
GGTTCACA -0.000906497143953  
GGTTCAGA -0.0437864596649  
GGTTCATA -0.0573019978942  
GGTTC CAA -0.0568343981207  
GGTTC CAC -0.166105911695  
GGTTC CCA -0.285198536149  
GGTTC CGA -0.231556112373  
GGTTC CTA -0.170499692699  
GGTTC GAA -0.137360466265  
GGTTC GAC -0.198163053676  
GGTTC GCA -0.178287850923  
GGTTC GGA -0.165703171979  
GGTTC GTA -0.0373608641243  
GGTTC TAA -0.136160519725  
GGTTC TAC -0.266906423508  
GGTTC TCA -0.197999506051  
GGTTC TGA -0.0488878880769  
GGTTC TTA -0.0216716737075  
GGTTG AAA -0.0803694921952  
GGTTG AAC -0.308300212304  
GGTTG ACA -0.184304107431  
GGTTG AGA -0.03941278166  
GGTTG ATA 0.00348251333729  
GGTTG CAA 0.111152275571  
GGTTG CAC -0.0698224527318  
GGTTG CCA -0.260599126388  
GGTTG CGA 0.0432161899089  
GGTTG CTA -0.0776328214664  
GGTTG GAA 0.056605249292  
GGTTG GAC -0.209400666475  
GGTTG GCA -0.113384081592  
GGTTG GGA -0.0439818110499  
GGTTG GTA -0.161381970932  
GGTTG TAA -0.0234692309381  
GGTTG TAC -0.205407659845  
GGTTG TCA -0.16750686444  
GGTTG TGA -0.0299986634978  
GGTTG TTA -0.229025417574  
GGTTT AAA -0.160478581817  
GGTTT AAC -0.181762062324  
GGTTT ACA 0.216221816066  
GGTTT AGA 0.0177371318989  
GGTTT ATA 0.0432281718589  
GGTTT CAA -0.0593070100332  
GGTTT CAC -0.142187534304  
GGTTT CCA -0.294379059149  
GGTTT CGA -0.12437427186

GGTTTCTA 0.035994204044  
GGTTTGAA 0.0823238853457  
GGTTTGAC 0.0602196620807  
GGTTTGCA -0.0601817553218  
GGTTTGGA -0.108592343825  
GGTTTGTA -0.0855554800948  
GGTTTTAA -0.130526055816  
GGTTTTAC -0.000457575473955  
GGTTTTCA -0.045459300045  
GGTTTTGA -0.219629245485  
GGTTTTTA 0.0566806618918  
GTAAAAAA 0.099973451546  
GTAAAAAC -0.0198138268678  
GTAAAAACA 0.0310853805587  
GTAAAAGA 0.144708206819  
GTAAAATA 0.166526707502  
GTAAACAA -0.0498274907245  
GTAAACAC -0.0086320609445  
GTAAACCA 0.0517084307463  
GTAAACGA -0.13708833988  
GTAAACTA -0.0984940783913  
GTAAAGAA 0.0202591458395  
GTAAAGAC -0.191710213294  
GTAAAGCA 0.169797916697  
GTAAAGGA 0.00738599218398  
GTAAAGTA -0.0081254630773  
GTAAATAA 0.162865195473  
GTAAATAC 0.0707370084963  
GTAAATCA 0.212199090552  
GTAAATGA 0.0280394892818  
GTAAATTA 0.244506873071  
GTAACAAA 0.06890888082751  
GTAACAAC -0.109221284088  
GTAACACA 0.0390663587869  
GTAACAGA -0.179862688926  
GTAACATA 0.0623240393164  
GTAACCAA -0.0670150116648  
GTAACCAC -0.0228625407488  
GTAACCCA 0.00920437331226  
GTAACCGA 0.0400173439593  
GTAACCTA -0.0143724666948  
GTAACGAA 0.210317460317  
GTAACGAC 0.0313947616852  
GTAACGCA 0.00821642626622  
GTAACGGA -0.0660686008165  
GTAACGTA 0.0587064534329  
GTAAC TAA 0.0854952830189  
GTAAC TAC 0.010934258619  
GTAAC TCA 0.0854574194823  
GTAAC TGA -0.0504917699359  
GTAAC TTA 0.00841127137808  
GTAAGAAA 0.219582177153  
GTAAGAAC -0.0934137076624  
GTAAGACA -0.106916740517

GTAAGAGA 0.00115787485654  
GTAAGATA 0.230433159894  
GTAAGCAA -0.0511975038929  
GTAAGCAC -0.112073798851  
GTAAGCCA -0.0139083391926  
GTAAGCGA 0.296917176354  
GTAAGCTA -0.0727333945197  
GTAAGGAA -0.0282931704738  
GTAAGGAC -0.0865218918415  
GTAAGGCA 0.0751333728512  
GTAAGGGA 0.142011899273  
GTAAGGTA 0.0017012188921  
GTAAGTAA 0.0120035566094  
GTAAGTAC 0.0319454331498  
GTAAGTCA -0.01173419726  
GTAAGTGA 0.00110889534264  
GTAAGTTA 0.063266969667  
GTAATAAA 0.214012174393  
GTAATAAC 0.0341198489539  
GTAATACA -0.00853202046148  
GTAATAGA 0.14295323464  
GTAATATA 0.277067004764  
GTAATCAA 0.414171760479  
GTAATCAC 0.383987573822  
GTAATCCA 0.468166150739  
GTAATCGA 0.408205997936  
GTAATCTA 0.464482152456  
GTAATGAA -0.0870797460506  
GTAATGAC 0.0270546911446  
GTAATGCA 0.0574913195706  
GTAATGGA 0.114862195001  
GTAATGTA 0.0584683394251  
GTAATTAA 0.101267316516  
GTAATTAC 0.274195141221  
GTAATTCA 0.110862752201  
GTAATTGA 0.133187569916  
GTAATTTA 0.258120375859  
GTACAAAA 0.0330553658855  
GTACAAAC 0.0280069266065  
GTACAACA -0.070687611144  
GTACAAGA 0.109346527915  
GTACAATA 0.0525505499572  
GTACACAA 0.112228040133  
GTACACAC -0.145699010649  
GTACACCA -0.143520347689  
GTACACGA -0.190070898635  
GTACACTA -0.0232304770687  
GTACAGAA -0.0513540363125  
GTACAGAC -0.238768438035  
GTACAGCA 0.00857318492173  
GTACAGGA -0.0215583615645  
GTACAGTA -0.0213313381663  
GTACATAA -0.0173233770225  
GTACATAC -0.134477362468

GTACATCA 0.029280280577  
GTACATGA -0.0235985543961  
GTACATTA 0.0126731651628  
GTACCAAA 0.140768236166  
GTACCAAC -0.190854938272  
GTACCACA -0.149298696168  
GTACCAGA -0.00876990791048  
GTACCATA 0.172561417375  
GTACCCAA -0.0079055396402  
GTACCCAC -0.0386704859739  
GTACCCCA -0.0956411996059  
GTACCCGA 0.0161390612061  
GTACCCTA -0.289255948952  
GTACCGAA -0.147384394174  
GTACCGAC -0.226660965714  
GTACCGCA -0.171101451184  
GTACCGGA -0.0443883977082  
GTACCGTA -0.0677801925209  
GTACCTAA 0.0563568903818  
GTACCTAC 0.011730499023  
GTACCTCA 0.0364461813374  
GTACCTGA -0.0614196678919  
GTACCTTA -0.0980655659298  
GTACGAAA 0.171694408772  
GTACGAAC 0.0578442995455  
GTACGACA 0.0145228215768  
GTACGAGA 0.038668952392  
GTACGATA 0.145217238578  
GTACGCAA 0.107661529342  
GTACGCAC -0.0800219478738  
GTACGCCA -0.110710463489  
GTACGCGA 0.087651271919  
GTACGCTA 0.0116681759557  
GTACGGAA -0.0917857412648  
GTACGGAC -0.156182105471  
GTACGGCA -0.11030900876  
GTACGGGA 0.0823156425961  
GTACGGTA -0.00178836083391  
GTACGTAA 0.101261827922  
GTACGTAC -0.174714857058  
GTACGTCA -0.0801627675979  
GTACGTGA 0.0466612878439  
GTACGTTA -0.196049382716  
GTACTAAA 0.104042156475  
GTACTAAC 0.0166543179386  
GTACTACA 0.0660332828383  
GTACTAGA -0.0165409902642  
GTACTATA -0.0261051903582  
GTACTCAA 0.0731705899786  
GTACTCAC -0.25767354989  
GTACTCCA -0.199037813466  
GTACTCGA -0.149134939101  
GTACTCTA 0.0256241923784  
GTACTGAA -0.120845133812



GTACTGAC 0.00720378054403  
GTACTGCA 0.0080586661536  
GTACTGGA 0.118646579402  
GTACTGTA -0.118105634035  
GTACTTAA 0.141449318317  
GTACTTCA -0.00388005312435  
GTACTTGA -0.0437646361518  
GTACTTTA 0.061275242644  
GTAGAAAA 0.187187831418  
GTAGAAAC 0.162022576381  
GTAGAACA -0.0478415723181  
GTAGAAGA 0.151095523502  
GTAGAATA 0.00375837171124  
GTAGACAA -0.184529739998  
GTAGACAC -0.230453398089  
GTAGACCA -0.281023805928  
GTAGACGA 0.126177303563  
GTAGACTA -0.012254296631  
GTAGAGAA -0.00887219792832  
GTAGAGAC -0.09783682339  
GTAGAGCA -0.1987598153  
GTAGAGGA -0.121466488507  
GTAGAGTA -0.0162785291938  
GTAGATAA 0.241989396035  
GTAGATAC 0.326972527712  
GTAGATCA 0.117047055918  
GTAGATGA -0.00627840347757  
GTAGATTA 0.310901747708  
GTAGCAA 0.0352229308617  
GTAGCAAC -0.161421897878  
GTAGCACA -0.146402775033  
GTAGCAGA -0.00993063101628  
GTAGCATA 0.0875559322651  
GTAGCCAA -0.100306812444  
GTAGCCAC -0.219877842755  
GTAGCCCA -0.206640448002  
GTAGCCGA -0.256318868256  
GTAGCCTA -0.256205825705  
GTAGCGAA -0.0742089927768  
GTAGCGAC -0.103888256211  
GTAGCGCA -0.0372757555303  
GTAGCGGA 0.0547036161101  
GTAGCGTA 0.021319715834  
GTAGCTAA 0.114618319668  
GTAGCTAC -0.0140617283951  
GTAGCTCA -0.0944087433472  
GTAGCTGA -0.0286285099563  
GTAGCTTA -0.163091568792  
GTAGGAAA 0.0288041449867  
GTAGGAAC -0.115961623944  
GTAGGACA -0.149141817928  
GTAGGAGA 0.166057492838  
GTAGGATA 0.288650683879  
GTAGGCAA -0.136809445232

GTAGGCAC -0.273440382029  
GTAGGCCA -0.102372250757  
GTAGGCCG -0.0506547246644  
GTAGGCTA -0.227438358495  
GTAGGGAA 0.00322407160457  
GTAGGGAC -0.363118394416  
GTAGGGCA -0.0875801498552  
GTAGGGGA 0.0176011528784  
GTAGGGTA -0.0539145468017  
GTAGGTAA 0.161479232345  
GTAGGTCA -0.285609103662  
GTAGGTGA -0.1706960702  
GTAGGTTA -0.109374228281  
GTAGTAAA 0.0283952446816  
GTAGTAAC -0.0142593690312  
GTAGTACA -0.260528640646  
GTAGTAGA -0.104430067167  
GTAGTATA 0.294819864322  
GTAGTCAA -0.00250554348065  
GTAGTCAC -0.199657225853  
GTAGTCCA -0.0523337504665  
GTAGTCGA -0.146543728218  
GTAGTCTA -0.0281739863147  
GTAGTGAA 0.0401624220941  
GTAGTGAC -0.121528463852  
GTAGTGCA -0.00184068687984  
GTAGTGGA -0.181047204067  
GTAGTGTA 0.104524797471  
GTAGTTAA 0.155835137216  
GTAGTTCA -0.180285295667  
GTAGTTGA -0.0375403816208  
GTAGTTTA -0.0535196494878  
GTATAAAA 0.146708700769  
GTATAAAC -0.102515529574  
GTATAACA 0.0545464709048  
GTATAAGA 0.136313963252  
GTATAATA 0.250050121308  
GTATACAA -0.0500432898182  
GTATACAC -0.0358447494521  
GTATACCA 0.0131468447833  
GTATACGA 0.222419965836  
GTATACTA 0.192655162572  
GTATAGAA 0.0238067795122  
GTATAGAC -0.0742433882725  
GTATAGCA -0.0143608443624  
GTATAGGA -0.083195352215  
GTATAGTA -0.106674020657  
GTATATAA 0.0441111094969  
GTATATAC -0.00284834418951  
GTATATCA -0.00809350166345  
GTATATGA 0.102016474656  
GTATATTA 0.219403828844  
GTATCAAA 0.251508724013  
GTATCAAC 0.0633149757977

GTATCACA 0.218333552877  
GTATCAGA 0.245791620014  
GTATCATA 0.160677291415  
GTATCCAA 0.336700419857  
GTATCCAC 0.322550230267  
GTATCCCA 0.20623973966  
GTATCCGA 0.318790405765  
GTATCCTA 0.304968275923  
GTATCGAA 0.187441346439  
GTATCGAC 0.00592303110427  
GTATCGCA 0.298217304441  
GTATCGGA 0.0968407648906  
GTATCGTA 0.273096006498  
GTATCTAA 0.355935366309  
GTATCTCA 0.271674158969  
GTATCTGA 0.267220465872  
GTATCTTA 0.126004968547  
GTATGAAA 0.0385411067366  
GTATGAAC -0.0344615552615  
GTATGACA -0.0874395031853  
GTATGAGA 0.12299623727  
GTATGATA 0.215007396969  
GTATGCAA 0.01975195081  
GTATGCAC -0.0397375439983  
GTATGCCA -0.070304940944  
GTATGCGA -0.0871694820376  
GTATGCTA -0.0605489973328  
GTATGGAA -0.0130875540627  
GTATGGAC -0.185877491893  
GTATGGCA -0.113726361785  
GTATGGGA -0.155901671252  
GTATGGTA 0.0194257689246  
GTATGTAA 0.136145453489  
GTATGTCA -0.0619463927031  
GTATGTGA 0.147445266079  
GTATGTTA -0.0405543070236  
GTATTTAA -0.0670843487234  
GTATTTAA 0.0705214068833  
GTATTTACA 0.071766198582  
GTATTTAGA 0.119412476539  
GTATTTATA 0.0542893670187  
GTATTTCAA 0.0425613076028  
GTATTTCAC 0.176293559567  
GTATTTCCA 0.0330867825743  
GTATTTCGA 0.148653988639  
GTATTTCTA -0.00443752881512  
GTATTTGAA 0.100938503334  
GTATTTGAC 0.0454128107158  
GTATTTGCA 0.0660063234858  
GTATTTGGA 0.114965017147  
GTATTTGTA 0.106866051163  
GTATTTTAA 0.137999215493  
GTATTTTCA 0.031131869888  
GTATTTTGA 0.117925201431

GTATTTTA 0.105360800779  
GTCAAAAA 0.0808057181875  
GTCAAAAC -0.118971808399  
GTCAAACA -0.138795345256  
GTCAAAGA 0.109268441073  
GTCAAATA 0.108847500472  
GTCAACAA -0.0230230662847  
GTCAACAC -0.0895631455842  
GTCAACCA -0.0266456496157  
GTCAACGA -0.136073935064  
GTCAACTA -0.112587251416  
GTCAAGAA 0.111256558871  
GTCAAGAC -0.156501211535  
GTCAAGCA 0.0714729853413  
GTCAAGGA -0.017378028408  
GTCAAGTA -0.0326543941689  
GTCAATAA 0.027646051505  
GTCAATCA 0.0605145008672  
GTCAATGA -0.273397240378  
GTCAATTA -0.0965232898506  
GTCACAAA 0.09761161071  
GTCACAAC -0.0697245760865  
GTCACACA 0.0503639242805  
GTCACAGA 0.0719059172199  
GTCACATA -0.106349755209  
GTCACCAA -0.19257179987  
GTCACCAC -0.147190530284  
GTCACCCA -0.153624468357  
GTCACCGA -0.0330496430551  
GTCACCTA -0.136031848773  
GTCACGAA -0.023288107313  
GTCACGAC -0.246640522876  
GTCACGCA -0.0815852159213  
GTCACGGA 0.0855740521197  
GTCACGTA 0.0060959132974  
GTCACTAA -0.0849987943021  
GTCACTCA 0.0190485736449  
GTCACTGA -0.147673021204  
GTCACTTA -0.11478261824  
GTCAGAAA -0.103570961603  
GTCAGAAC -0.0995483555863  
GTCAGACA -0.235441114348  
GTCAGAGA -0.219967532468  
GTCAGATA 0.27901820018  
GTCAGCAA -0.181656285588  
GTCAGCAC -0.142838329465  
GTCAGCCA -0.265344889684  
GTCAGCGA -0.0813875112943  
GTCAGCTA -0.211443992877  
GTCAGGAA 0.00234637423434  
GTCAGGAC -0.0475969109367  
GTCAGGCA -0.0705237345358  
GTCAGGGA -0.116676737862  
GTCAGGTA -0.164345335111

GTCAGTAA -0.0165728116973  
GTCAGTCA -0.0952945437782  
GTCAGTGA -0.294185746657  
GTCAGTTA -0.155325207386  
GTCATAAA 0.093912599618  
GTCATAAC -0.282885640924  
GTCATACA -0.042477526425  
GTCATAGA -0.163044909785  
GTCATATA 0.0230575863356  
GTCATCAA -0.0404902057632  
GTCATCAC -0.176177461666  
GTCATCCA -0.00806469316298  
GTCATCGA -0.0682832668235  
GTCATCTA -0.0192020500782  
GTCATGAA -0.0377263113859  
GTCATGAC -0.0671702957587  
GTCATGCA -0.0701949346622  
GTCATGGA 0.0172341873587  
GTCATGTA -0.0291677077825  
GTCATTAA -0.08963332354  
GTCATTCA -0.180801097394  
GTCATTGA -0.0475600366103  
GTCATTTA 0.0592524449274  
GTCCAAAA -0.0295548958339  
GTCCAAAC -0.02305466294  
GTCCAACA -0.130853586248  
GTCCAAGA -0.0510997998251  
GTCCAATA -0.104365628225  
GTCCACAA -0.0992115026482  
GTCCACAC -0.285741574815  
GTCCACCA -0.184892532416  
GTCCACGA -0.00774128042589  
GTCCACTA -0.0721851188003  
GTCCAGAA -0.136932784636  
GTCCAGAC -0.38209159361  
GTCCAGCA -0.0913697989443  
GTCCAGGA -0.121179375454  
GTCCAGTA 0.0299265626029  
GTCCATAA -0.0100825484643  
GTCCATCA -0.320998740927  
GTCCATGA -0.100395159299  
GTCCATTA -0.080513017179  
GTCCCAAA -0.0196491690268  
GTCCCAAC -0.0244846209576  
GTCCACA -0.133091685674  
GTCCAGA -0.192423568924  
GTCCATA -0.183229759529  
GTCCCAA -0.132652333289  
GTCCCCAC -0.258670167652  
GTCCCCCA -0.128171493816  
GTCCCCGA -0.192693538201  
GTCCCCTA -0.118862685067  
GTCCCGAA -0.178532422272  
GTCCCGAC -0.0923987890128

GTCCCGCA -0.216893849598  
GTCCCGGA -0.0148801915077  
GTCCCGTA -0.0363464229851  
GTCCCTAA 0.0156232848142  
GTCCCTCA -0.301234965916  
GTCCCTGA -0.177817287853  
GTCCCTTA -0.195684763756  
GTCCGAAA 0.0633053913094  
GTCCGAAC -0.234853506562  
GTCCGACA -0.0121293565586  
GTCCGAGA 0.00931698009223  
GTCCGATA 0.0254027057435  
GTCCGCAA -0.114365851037  
GTCCGCAC -0.172304805176  
GTCCGCCA -0.239003264747  
GTCCGCGA 0.0130610451436  
GTCCGCTA -0.176811909949  
GTCCGGAA -0.0618888285263  
GTCCGGAC -0.223591833803  
GTCCGGCA -0.1898995299  
GTCCGGGA -0.0116346713205  
GTCCGGTA -0.0870436233507  
GTCCGTAA 0.0485466201234  
GTCCGTCA -0.26988790677  
GTCCGTGA -0.155077044646  
GTCCGTTA -0.293655496302  
GTCCTAAA -0.167781442041  
GTCCTAAC -0.185494437811  
GTCCTACA -0.136017607833  
GTCCTAGA -0.0997059695161  
GTCCTATA -0.255523148565  
GTCCTCAA 0.0408475748296  
GTCCTCAC -0.249086555078  
GTCCTCCA -0.354816332576  
GTCCTCGA -0.0582745098039  
GTCCTCTA -0.135974445103  
GTCCTGAA -0.0427985774968  
GTCCTGCA -0.0185267514106  
GTCCTGGA 0.00974291035128  
GTCCTGTA -0.243260318299  
GTCCTTAA -0.11988145221  
GTCCTTCA -0.128553001604  
GTCCTTGA -0.308713886977  
GTCCTTTA -0.123092767332  
GTCGAAAA 0.083723023557  
GTCGAAAC -0.196441539579  
GTCGAACA -0.077353885491  
GTCGAAGA -0.135775637332  
GTCGAATA 0.0564598375779  
GTCGACAA -0.139517239865  
GTCGACAC -0.0155606043145  
GTCGACCA -0.0976291613158  
GTCGACGA -0.0954074074074  
GTCGACTA -0.107541132954

GTCGAGAA 0.137333836968  
GTCGAGAC -0.210793995655  
GTCGAGCA -0.179921568627  
GTCGAGGA -0.0274043042741  
GTCGAGTA 0.00488735215828  
GTCGATAA 0.12221453819  
GTCGATCA -0.146564923198  
GTCGATGA -0.229427996444  
GTCGATTA 0.15914314355  
GTCGCAAA 0.0346487544752  
GTCGCAAC -0.167111176964  
GTCGCACA 0.0737886671497  
GTCGCAGA -0.0227760684953  
GTCGCATA -0.110304367392  
GTCGCCAA -0.098867621635  
GTCGCCAC -0.171388710554  
GTCGCCCA -0.239987315186  
GTCGCCGA -0.169319908318  
GTCGCCTA -0.146750877356  
GTCGCGAA -0.0160742092175  
GTCGCGAC -0.169143910589  
GTCGCGCA 0.0600685717606  
GTCGCGGA 0.0776158722318  
GTCGCGTA 0.0376461871486  
GTCGCTAA 0.0610274141763  
GTCGCTCA -0.275725310121  
GTCGCTGA -0.0580850560428  
GTCGCTTA 0.121385088413  
GTCGGAAA 0.0279940502475  
GTCGGAAC -0.148681272255  
GTCGGACA -0.0856218512299  
GTCGGAGA -0.13876751807  
GTCGGATA 0.193864861331  
GTCGGCAA -0.138625488388  
GTCGGCAC -0.282327961799  
GTCGGCCA -0.226543209877  
GTCGGCGA 0.00679454460635  
GTCGGCTA -0.1485634313  
GTCGGGAA -0.0421298945772  
GTCGGGCA -0.229419092146  
GTCGGGGA -0.108869352387  
GTCGGGTA -0.145240682207  
GTCGGTAA -0.0675989761737  
GTCGGTCA -0.342715586062  
GTCGGTGA 0.0679069375565  
GTCGGTTA 0.0807069283628  
GTCGTAAA 0.0676521435939  
GTCGTAAAC -0.0584966513155  
GTCGTACA -0.039191957346  
GTCGTAGA -0.135285474391  
GTCGTATA 0.0900102087861  
GTCGTCAA -0.069494154833  
GTCGTCAC -0.211551606288  
GTCGTCCA -0.149730994152

GTCTGCGA -0.135214715636  
GTCTGCTA -0.148417950744  
GTCTGCAA -0.113632622152  
GTCTGCGA 0.0188917429581  
GTCTGGGA 0.222946842358  
GTCTGTGA -0.0242047026279  
GTCTTTAA 0.0237604056194  
GTCTTTCA 0.0459011174779  
GTCTTTGA 0.007854179016  
GTCTTTTA 0.0324647461227  
GTCTAAAA -0.0218136649572  
GTCTAAAC -0.211533712028  
GTCTAACA 0.0925471794052  
GTCTAAGA -0.0171385817849  
GTCTAATA 0.0924023119103  
GTCTACAA -0.0764478912819  
GTCTACAC -0.149330652846  
GTCTACCA -0.168800985428  
GTCTACGA -0.169915272839  
GTCTACTA -0.203112910926  
GTCTAGAA -0.128430985195  
GTCTAGAC -0.141431347993  
GTCTAGCA 0.0174216661987  
GTCTAGGA -0.0854420133573  
GTCTAGTA -0.121140332275  
GTCTATAA -0.00611770517049  
GTCTATCA -0.187366901124  
GTCTATGA 0.00367992096814  
GTCTATTA -0.087918648125  
GTCTCAA 0.10957979319  
GTCTCAAC -0.0824706172911  
GTCTCACA -0.248813596733  
GTCTCAGA -0.170167029775  
GTCTCATA -0.0114542518921  
GTCTCCAA -0.135734538778  
GTCTCCAC -0.110603864243  
GTCTCCCA -0.235925832339  
GTCTCCGA -0.106408133624  
GTCTCCTA -0.200854278801  
GTCTCGAA -0.177232211465  
GTCTCGCA -0.165454249657  
GTCTCGGA -0.139839519372  
GTCTCGTA -0.103640695597  
GTCTCTAA -0.329080061809  
GTCTCTCA -0.259918663762  
GTCTCTGA 0.0549984631935  
GTCTCTTA -0.255491648511  
GTCTGAAA 0.0503348684497  
GTCTGAAC -0.0372394055177  
GTCTGACA -0.0418906276331  
GTCTGAGA 0.0153646582355  
GTCTGATA 0.144185888571  
GTCTGCAA -0.141185412002  
GTCTGCAC -0.228410239882



GTCTGCCA -0.228402376603  
GTCTGCGA -0.130022006004  
GTCTGCTA -0.118813212383  
GTCTGGAA -0.18440877915  
GTCTGGCA -0.128364696004  
GTCTGGGA -0.0393141289438  
GTCTGGTA -0.146396481453  
GTCTGTAA 0.0671087995584  
GTCTGTCA -0.179641718889  
GTCTGTGA -0.132051486932  
GTCTGTTA -0.270646053541  
GTCTTAAA -0.0409550760935  
GTCTTAAC -0.213643770678  
GTCTTACA 0.0239135182354  
GTCTTAGA -0.0713206604319  
GTCTTATA -0.0155022169542  
GTCTTCAA 0.021214790665  
GTCTTCAC -0.155692510596  
GTCTTCCA -0.0678478246974  
GTCTTCGA -0.0655106248554  
GTCTTCTA -0.00188350599888  
GTCTTGAA -0.176056260735  
GTCTTGCA -0.0942033405955  
GTCTTGGA -0.0251975308642  
GTCTTGTA 0.0211482864324  
GTCTTTAA -0.0432850799197  
GTCTTTCA -0.0587581537925  
GTCTTTGA -0.038647700894  
GTCTTTTA 0.0605254780566  
GTGAAAAA 0.0117272275631  
GTGAAAAC 0.12558337255  
GTGAAACA -0.0333102812356  
GTGAAAGA -0.0497217904203  
GTGAAATA 0.0795650342132  
GTGAACAA 0.0707230343738  
GTGAACAC -0.248374406564  
GTGAACCA -0.202905159694  
GTGAACGA 0.0837806538014  
GTGAACTA -0.194770967441  
GTGAAGAA 0.0101826158964  
GTGAAGCA -0.1829218107  
GTGAAGGA -0.203587574341  
GTGAAGTA 0.0333629673532  
GTGAATAA 0.00210751625916  
GTGAATCA 0.0133866824738  
GTGAATGA -0.0562855386507  
GTGAATTA 0.117754565397  
GTGACAAA 0.0161905545951  
GTGACAAC -0.118974200308  
GTGACACA 0.0339590022228  
GTGACAGA -0.13173704883  
GTGACATA -0.047991898434  
GTGACCAA -0.146069619076  
GTGACCAC -0.289618898809

GTGACCCA -0.2931272835  
GTGACCGA -0.107581699346  
GTGACCTA -0.204769844336  
GTGACGAA -0.0538764602916  
GTGACGCA 0.0422243367755  
GTGACGGA -0.190462473732  
GTGACGTA -0.0246136029331  
GTGACTAA -0.131321612011  
GTGACTCA -0.183912871678  
GTGACTGA 0.0725262903686  
GTGACTTA 0.00494966077318  
GTGAGAAA 0.00669591620298  
GTGAGAAC -0.147378390313  
GTGAGACA -0.109878680828  
GTGAGAGA -0.046248786979  
GTGAGATA 0.0763834002942  
GTGAGCAA -0.0348221133223  
GTGAGCAC -0.181191046471  
GTGAGCCA -0.280340065511  
GTGAGCGA -0.065633207056  
GTGAGCTA -0.128863320879  
GTGAGGAA 0.14802191047  
GTGAGGCA -0.0647699957193  
GTGAGGGA -0.0370526933547  
GTGAGGTA -0.0579605712376  
GTGAGTAA 0.0662211439281  
GTGAGTCA -0.253185185185  
GTGAGTGA 0.133268926242  
GTGAGTTA 0.0353536821002  
GTGATAAA 0.0226184987596  
GTGATAAC -0.062207080906  
GTGATACA -0.0383754885012  
GTGATAGA 0.119058596237  
GTGATATA 0.146277221681  
GTGATCAA -0.0974993962546  
GTGATCAC 0.18656991125  
GTGATCCA 0.0609053796871  
GTGATCGA -0.0790880347792  
GTGATCTA 0.151809040813  
GTGATGAA -0.0327641660629  
GTGATGCA -0.097986430927  
GTGATGGA -0.0752015243324  
GTGATGTA -0.0549771073977  
GTGATTAA 0.0532666017753  
GTGATTCA 0.101537053448  
GTGATTGA 0.0128323344091  
GTGATTTA 0.114931791437  
GTGCAAAA -0.00554320682747  
GTGCAAAC -0.0434845840605  
GTGCAACA -0.194501746169  
GTGCAAGA 0.103109135315  
GTGCAATA 0.0217658085836  
GTGCACAA -0.173866191782  
GTGCACAC -0.197111374512

GTGCACCA -0.165991736217  
GTGCACGA 0.080993559827  
GTGCACTA -0.197517898272  
GTGCAGAA -0.0331291576105  
GTGCAGCA -0.114872242848  
GTGCAGGA 0.0784701117432  
GTGCAGTA 0.054748449145  
GTGCATAA 0.0298947940334  
GTGCATCA -0.103008724604  
GTGCATGA -0.0815505380343  
GTGCATTA 0.1362381278  
GTGCCAAA -0.155959331881  
GTGCCAAC -0.153449853397  
GTGCCACA -0.23316817593  
GTGCCAGA -0.0551748407171  
GTGCCATA -0.114050306233  
GTGCCCAA -0.153385459534  
GTGCCCAC -0.144280045088  
GTGCCCCA -0.0427493201943  
GTGCCCGA -0.0687794872987  
GTGCCCTA -0.225071957386  
GTGCCGAA -0.132748041927  
GTGCCGCA -0.337900557942  
GTGCCGGA -0.1406728107  
GTGCCGTA -0.0199829861969  
GTGCCTAA -0.273750740668  
GTGCCTCA -0.154181202381  
GTGCCTGA -0.012455247688  
GTGCCTTA -0.15875845078  
GTGCGAAA -0.0439251521799  
GTGCGAAC -0.103340412571  
GTGCGACA -0.0435270872982  
GTGCGAGA -0.0490378493491  
GTGCGATA 0.0879098688129  
GTGCGCAA 0.126693231465  
GTGCGCAC 0.116531700573  
GTGCGCCA -0.0780318943402  
GTGCGCGA 0.187981055598  
GTGCGCTA -0.28109770619  
GTGCGGAA 0.15909240598  
GTGCGGCA -0.211602194787  
GTGCGGGA -0.0405936464028  
GTGCGGTA -0.075706312358  
GTGCGTAA 0.0708831519765  
GTGCGTCA -0.0582235265062  
GTGCGTGA -0.0208228611277  
GTGCGTTA 0.0462331774572  
GTGCTAAA 0.0593512298726  
GTGCTAAC -0.156138322167  
GTGCTACA -0.147813343871  
GTGCTAGA 0.252994418651  
GTGCTATA 0.0206920020198  
GTGCTCAA -0.244451577151  
GTGCTCCA -0.234278816964

GTGCTCGA -0.0178016282083  
GTGCTCTA -0.180604620355  
GTGCTGAA 0.0978983088272  
GTGCTGCA -0.303612669326  
GTGCTGGA -0.142608569354  
GTGCTGTA -0.123357418238  
GTGCTTAA 0.13012363256  
GTGCTTCA -0.176409260265  
GTGCTTGA -0.0853820115352  
GTGCTTTA -0.0199043886803  
GTGGAAAA 0.0796669520736  
GTGGAAAC -0.0443112219698  
GTGGAAACA -0.151336549173  
GTGGAAGA -0.146181498861  
GTGGAATA 0.192205492737  
GTGGACAA 0.00840029418868  
GTGGACAC -0.0666867132095  
GTGGACCA -0.112963237352  
GTGGACGA -0.201065847841  
GTGGACTA -0.1408853743  
GTGGAGAA -0.189827160494  
GTGGAGCA -0.0663895063253  
GTGGAGGA -0.110118727722  
GTGGAGTA 0.0926077110476  
GTGGATAA 0.179282201585  
GTGGATCA 0.0199867176008  
GTGGATGA 0.0022749101287  
GTGGATTA 0.299782081269  
GTGGCAA 0.0836533486559  
GTGGCAAC -0.312199618145  
GTGGCACA -0.191145969499  
GTGGCAGA -0.0202368397352  
GTGGCATA -0.0237723065123  
GTGGCCAA -0.270333407396  
GTGGCCAC -0.127871846769  
GTGGCCCA -0.31322875817  
GTGGCCGA -0.181039949271  
GTGGCCTA -0.116920505442  
GTGGCGAA 0.076572283643  
GTGGCGCA -0.100212915405  
GTGGCGGA -0.0930539779742  
GTGGCGTA -0.0102000493949  
GTGGCTAA -0.0761542514655  
GTGGCTCA -0.312517902119  
GTGGCTGA -0.0789662155488  
GTGGCTTA -0.366815341486  
GTGGGAAA -0.0581247366815  
GTGGGAAC -0.179144032922  
GTGGGACA -0.221558233461  
GTGGGAGA 0.0903844570676  
GTGGGATA 0.0766345035017  
GTGGGCAA -0.057767349963  
GTGGGCCA -0.284782584837  
GTGGGCGA -0.115812636166

GTGGGCTA -0.230921490208  
GTGGGGAA -0.0263315330743  
GTGGGGCA -0.053733702094  
GTGGGGGA -0.0436891370535  
GTGGGGTA -0.0551275508804  
GTGGGTAA -0.110970358706  
GTGGGTCA -0.400895014404  
GTGGGTGA -0.185534539429  
GTGGGTTA -0.174473970167  
GTGGTAAA -0.0549347906298  
GTGGTAAC -0.0418476602792  
GTGGTACA -0.089217606998  
GTGGTAGA -0.00444365033019  
GTGGTATA 0.0342321270321  
GTGGTCAA 0.0186888768152  
GTGGTCCA -0.0750289480472  
GTGGTCGA -0.0719546664471  
GTGGTCTA -0.112392830891  
GTGGTGAA 0.180058983336  
GTGGTGCA -0.179397095859  
GTGGTGGA -0.0732715412665  
GTGGTGTA -0.019399307442  
GTGGTTAA -0.0839294326839  
GTGGTTCA -0.242817250668  
GTGGTTGA -0.119131556851  
GTGGTTTA -0.118556022063  
GTGTAAAA 0.0910595208694  
GTGTAAAC -0.0883469169342  
GTGTAACA -0.0136583679115  
GTGTAAGA 0.113852664164  
GTGTAATA 0.287410261477  
GTGTACAA -0.0779756802696  
GTGTACAC -0.259919361475  
GTGTACCA 0.020779819535  
GTGTACGA 0.0872851215175  
GTGTACTA -0.0620194286655  
GTGTAGAA -0.0601659751037  
GTGTAGCA -0.107139017622  
GTGTAGGA 0.0371129438491  
GTGTAGTA -0.0390379614429  
GTGTATAA 0.0667687545281  
GTGTATCA 0.153481614923  
GTGTATGA 0.118295681574  
GTGTATTA 0.0873235416804  
GTGTCAA -0.0590835534095  
GTGTCAAC -0.218912293339  
GTGTCACA -0.106126107281  
GTGTCAGA 0.0269270455992  
GTGTCATA -0.132969941526  
GTGTCCAA -0.140060761745  
GTGTCCCA -0.227040349496  
GTGTCCGA 0.0117428483611  
GTGTCCTA -0.0204630108489  
GTGTCGAA -0.163066148543

GTGTCGCA 0.00959567901235  
GTGTCGGA 0.0517179259948  
GTGTCGTA 0.0547005070242  
GTGTCTAA -0.153618658052  
GTGTCTCA -0.122985685745  
GTGTCTGA -0.0366016622462  
GTGTCTTA -0.208832035473  
GTGTGAAA -0.0844774792572  
GTGTGAAC -0.131299927378  
GTGTGACA -0.0915644345545  
GTGTGAGA -0.0352700048807  
GTGTGATA 0.144476278294  
GTGTGCAA 0.0502418897912  
GTGTGCCA -0.402752579483  
GTGTGCGA 0.117680958967  
GTGTGCTA -0.124582866803  
GTGTGGAA 0.00974266521782  
GTGTGGCA -0.107245257907  
GTGTGGGA -0.0741584394303  
GTGTGGTA -0.0281565528162  
GTGTGTAA 0.195535537884  
GTGTGTCA 0.0476094315227  
GTGTGTGA -0.0120625281478  
GTGTGTTA -0.110349315546  
GTGTTAAA 0.00027438907273  
GTGTTAAC -0.0837833980988  
GTGTTACA 0.0539900732417  
GTGTTAGA -0.0616972930251  
GTGTTATA 0.0870463344054  
GTGTTCAA -0.131378489029  
GTGTTCCA -0.27614556587  
GTGTTCGA 0.0328336461523  
GTGTTCTA -0.139584313746  
GTGTTGAA 0.0277311247228  
GTGTTGCA 0.0148628375761  
GTGTTGGA -0.150469472657  
GTGTTGTA -0.0307855276735  
GTGTTTAA -0.0158230238653  
GTGTTTCA -0.137564210214  
GTGTTTGA -0.136446464247  
GTGTTTTA 0.153901471678  
GTTAAAAA 0.188006322861  
GTTAAAAC 0.14416891699  
GTTAAACA 0.0771127220955  
GTTAAAGA 0.0975192630643  
GTTAAATA 0.201375793587  
GTTAACAA 0.0668531082475  
GTTAACCA -0.184729699324  
GTTAACGA -0.0532503457815  
GTTAACTA -0.0582956551582  
GTTAAGAA 0.124766734725  
GTTAAGCA 0.0450915497596  
GTTAAGGA 0.126133394806  
GTTAAGTA 0.161008527886

GTTAATAA 0.142447663185  
GTTAATCA -0.0567187617812  
GTTAATGA 0.0781935990005  
GTTAATTA -0.0461875060125  
GTTACAAA 0.173231025928  
GTTACAAC -0.199293792286  
GTTACACA -0.0675009878495  
GTTACAGA 0.155200267314  
GTTACATA 0.158993611276  
GTTACCAA 0.0116275878724  
GTTACCCA -0.0482215804429  
GTTACCGA -0.112145337266  
GTTACCTA -0.053661990384  
GTTACGAA 0.113899317219  
GTTACGCA -0.0148373599872  
GTTACGGA -0.0760129944247  
GTTACGTA 0.206471632819  
GTTACTAA -0.00459082126306  
GTTACTCA -0.121610090434  
GTTACTGA 0.0161063042228  
GTTACTTA 0.015705234038  
GTTAGAAA -0.105575863356  
GTTAGAAC -0.0733499920096  
GTTAGACA -0.0719553121323  
GTTAGAGA -0.024198098368  
GTTAGATA 0.26386326326  
GTTAGCAA 0.0286940856856  
GTTAGCCA -0.103871597535  
GTTAGCGA 0.147388607209  
GTTAGCTA -0.0813369556269  
GTTAGGAA 0.0620850464167  
GTTAGGCA -0.138700286753  
GTTAGGGA -0.0358031003788  
GTTAGGTA -0.043025093855  
GTTAGTAA -0.0883660324405  
GTTAGTCA -0.0568317522119  
GTTAGTGA -0.0613366477896  
GTTAGTTA -0.000933015010565  
GTTATAAA 0.0856522645942  
GTTATAAC 0.0358433478033  
GTTATACA -0.105268790648  
GTTATAGA 0.0810802652089  
GTTATATA 0.0680118143504  
GTTATCAA 0.212631507458  
GTTATCCA 0.185220861051  
GTTATCGA 0.0867447299987  
GTTATCTA 0.00631188390524  
GTTATGAA 0.129209826682  
GTTATGCA 0.062859638941  
GTTATGGA -0.00850648139001  
GTTATGTA 0.00963927186088  
GTTATTAA 0.0554806560807  
GTTATTCA 0.00509616017915  
GTTATTGA -0.0480018360564

GTTATTTA 0.0862478752924  
GTTCAAAA -0.078073944678  
GTTCAAAC -0.0195192316073  
GTTCAACA -0.0539458734273  
GTTCAAGA 0.0113806011109  
GTTCAATA 0.0517469818256  
GTTCACAA -0.0659418563434  
GTTCACCA -0.136546790269  
GTTCACGA -0.252288517897  
GTTCACTA -0.0357772683825  
GTTCAGAA -0.00215739543533  
GTTCAGCA -0.0909110717928  
GTTCAGGA 0.0331309110456  
GTTCAGTA -0.0488265384531  
GTTCATAA -0.0663367986962  
GTTCATCA -0.270840805718  
GTTCATGA 0.0580550026877  
GTTCATT A -0.119688513525  
GTTCCAAA 0.0492567931215  
GTTCCAAC -0.182130471048  
GTTCCACA -0.184684768114  
GTTCCAGA 0.0131442085873  
GTTCCATA 0.0295047433644  
GTTCCCAA -0.167398353197  
GTTCCCCA -0.157617190905  
GTTCCCGA 0.0520898406288  
GTTCCCTA -0.21253676632  
GTTCCGAA -0.198852578068  
GTTCCGCA -0.0736505584369  
GTTCCGGA 0.0565709455751  
GTTCCGTA -0.00570827602524  
GTTCCCTAA 0.00352246317661  
GTTCCCTCA -0.028065093468  
GTTCCCTGA 0.122003227294  
GTTCCCTTA -0.0499135589034  
GTTCGAAA 0.102208243139  
GTTCGAAC -0.0228570017776  
GTTCGACA -0.0594579463874  
GTTCGAGA 0.179004256679  
GTTCGATA 0.0550196689174  
GTTCGCAA 0.0406567652418  
GTTCGCCA -0.178038970374  
GTTCGCGA 0.0578607653296  
GTTCGCTA -0.214689614302  
GTTCGGAA -0.0815279424031  
GTTCGGCA -0.116622760078  
GTTCGGGA 0.0395947221673  
GTTCGGTA -0.242093953764  
GTTCGTAA 0.0657547978441  
GTTCGTCA -0.287534744308  
GTTCGTGA 0.0818430113463  
GTTCGTTA 0.0121243056928  
GTTCTAAA 0.0389667113843  
GTTCTACA -0.119032639638



GTTCTAGA -0.117158944977  
GTTCTATA -0.102027935567  
GTTCTCAA -0.105326132297  
GTTCTCCA -0.208091835167  
GTTCTCGA 0.0320570367723  
GTTCTCTA -0.0477891940548  
GTTCTGAA -0.0787739085096  
GTTCTGCA 0.110402036311  
GTTCTGGA 0.0750950805097  
GTTCTGTA 0.0304272659916  
GTTCTTAA 0.167061845485  
GTTCTTCA -0.155639514465  
GTTCTTGA -0.164243691484  
GTTCTTTA 0.0254109744263  
GTTGAAAA 0.112711925966  
GTTGAAAC 0.0529594502624  
GTTGAACA -0.192987222552  
GTTGAAGA 0.13956124174  
GTTGAATA 0.111398602415  
GTTGACAA -0.0460244359537  
GTTGACCA -0.265687775431  
GTTGACGA 0.168373619618  
GTTGACTA -0.0934647786834  
GTTGAGAA 0.199657237261  
GTTGAGCA -0.146287059443  
GTTGAGGA -0.00214846643947  
GTTGAGTA 0.107334957957  
GTTGATAA 0.00746008455247  
GTTGATCA -0.284449146374  
GTTGATGA -0.100446771609  
GTTGATTA 0.214276582453  
GTTGCAA 0.119047619048  
GTTGCAAC -0.00752375864716  
GTTGCACA 0.0631833568201  
GTTGCAGA 0.00821053209297  
GTTGCATA -0.0663241783574  
GTTGCCAA -0.0916842301697  
GTTGCCCA -0.288572806172  
GTTGCCGA -0.175004526973  
GTTGCCTA -0.0974074074074  
GTTGCGAA -0.0370302035361  
GTTGCGCA -0.114780417922  
GTTGCGGA 0.0213662051632  
GTTGCGTA 0.0259855908605  
GTTGCTAA -0.0599872154345  
GTTGCTCA -0.211944807553  
GTTGCTGA 0.0618207864058  
GTTGCTTA -0.0340934661508  
GTTGGAAA 0.0523368151904  
GTTGGACA -0.070267168364  
GTTGGAGA 0.115213632996  
GTTGGATA 0.287045269929  
GTTGGCAA -0.156088483697  
GTTGGCCA -0.191493177388

GTTGGCGA 0.0733906701727  
GTTGGCTA -0.136887884352  
GTTGGGAA 0.0456496157366  
GTTGGGCA -0.145968799557  
GTTGGGGA -0.122042554675  
GTTGGGTA 0.0044059693956  
GTTGGTAA 0.0437711562768  
GTTGGTCA -0.267381131505  
GTTGGTGA -0.191647600393  
GTTGGTTA -0.00375968736965  
GTTGTAAA 0.127280511098  
GTTGTACA -0.00985202748688  
GTTGTAGA 0.086011767547  
GTTGTATA 0.0594903607281  
GTTGTCAA 0.00171793014117  
GTTGTCCA -0.374631118495  
GTTGTCTA -0.0962208947592  
GTTGTCTA -0.161332543093  
GTTGTGAA -0.107122573954  
GTTGTGCA -0.0129051472404  
GTTGTGGA 0.117576675668  
GTTGTGTA 0.19740386152  
GTTGTTAA -0.0595832643326  
GTTGTTCA 0.0190070034468  
GTTGTTGA -0.0820710996179  
GTTGTTTA 0.000639421282575  
GTTTAAAA 0.0523145403851  
GTTTAAAC -0.000352395616827  
GTTTAAACA 0.0859737725971  
GTTTAAAGA 0.127892489407  
GTTTAAATA -0.0863350427847  
GTTTACAA -0.0243970923159  
GTTTACCA -0.116949026968  
GTTTACGA 0.00469205314368  
GTTTACTA -0.178922294844  
GTTTAGAA 0.122082431392  
GTTTAGCA -0.135408010878  
GTTTAGGA 0.122047564395  
GTTTAGTA 0.067057618358  
GTTTATAA 0.0178086252038  
GTTTATCA -0.0734126984127  
GTTTATGA -0.00901776109245  
GTTTATTA 0.0548420382445  
GTTTCAAA 0.0783592943863  
GTTTCACA -0.0250390781621  
GTTTCAGA 0.0961052932007  
GTTTCATA 0.176299150366  
GTTTCCAA -0.0117632530908  
GTTTCCCA -0.0881179927891  
GTTTCCGA 0.0327230016027  
GTTTCCTA -0.0633734338316  
GTTTCGAA 0.0896764633243  
GTTTCGCA -0.0983041080102  
GTTTCGGA -0.0716374991082

GTTTCGTA 0.0214185056586  
GTTTCTAA -0.12173749321  
GTTTCTCA -0.0264824694285  
GTTTCTGA 0.0346086881359  
GTTTCTTA 0.0734119916696  
GTTTGAAA 0.0228696019671  
GTTTGACA -0.104510762669  
GTTTGAGA -0.012887713742  
GTTTGATA 0.155796504863  
GTTTGCAA -0.00117389506964  
GTTTGCCA -0.262448578799  
GTTTGCGA -0.0605419438407  
GTTTGCTA -0.154873683966  
GTTTGCAA 0.170155303416  
GTTTGCCA -0.223414541589  
GTTTGCGA -0.0472366364307  
GTTTGCTA -0.0530620427564  
GTTTGCTA 0.0300800488138  
GTTTGCTA -0.0965781574947  
GTTTGCTA 0.0474022481284  
GTTTGCTA 0.101045028431  
GTTTAAA 0.180972789214  
GTTTACA 0.0696134121715  
GTTTAGA -0.08130838406  
GTTTATA -0.08618588952  
GTTTCAA -0.0675071619085  
GTTTCCA 0.0183431295071  
GTTTCGA 0.0499964900147  
GTTTCTA 0.0498365609519  
GTTTGAA 0.0466516828031  
GTTTGCA -0.0853851986787  
GTTTGGA -0.00369913010071  
GTTTGTA 0.0619854442469  
GTTTTAA -0.0128731858266  
GTTTTC A -0.111024436445  
GTTTTGA 0.0574792585871  
GTTTTTA 0.00788537734377  
TAAAAAA 0.231805965162  
TAAAAACA 0.109678587894  
TAAAAAGA 0.187086983249  
TAAAAATA 0.24166810728  
TAAAACAA 0.0271860880682  
TAAAACCA 0.1052191047  
TAAAACGA 0.130889253701  
TAAAACTA 0.0162709389888  
TAAAAGAA -0.0918669141979  
TAAAAGCA 0.125974225559  
TAAAAGGA -0.115577239835  
TAAAAGTA 0.0472924762344  
TAAAATAA 0.107356912336  
TAAAATCA 0.293235802595  
TAAAATGA 0.177981404641  
TAAAATTA 0.117814129851  
TAAACAAA 0.115696831983

TAAACACA 0.158894816571  
TAAACAGA 0.0200325425305  
TAAACATA 0.0226969622129  
TAAACCAA -0.0397691725114  
TAAACCCA -0.0951107020664  
TAAACCGA -0.00607153443336  
TAAACCTA -0.172027699585  
TAAACGAA -0.0868789655097  
TAAACGCA -0.0894265831796  
TAAACGGA 0.119939515686  
TAAACGTA -0.0536729675734  
TAAACTAA -0.0964066007035  
TAAACTCA 0.124300204176  
TAAACTGA 0.1041724173  
TAAACTTA -0.0852788633359  
TAAAGAAA 0.152481393664  
TAAAGACA 0.0790125209918  
TAAAGAGA 0.139429515467  
TAAAGATA 0.238340621504  
TAAAGCAA 0.102565629858  
TAAAGCCA -0.112013133236  
TAAAGCGA 0.0217952095545  
TAAAGCTA -0.103735814191  
TAAAGGAA -0.0631399583564  
TAAAGGCA 0.0516400234877  
TAAAGGGA 0.0928406432961  
TAAAGGTA 0.125768403258  
TAAAGTAA 0.112107564686  
TAAAGTCA -0.0977801345285  
TAAAGTGA -0.072989699708  
TAAAGTTA 0.024606712437  
TAAATAAA 0.191113274156  
TAAATACA 0.0884938910116  
TAAATAGA 0.0580299812309  
TAAATATA 0.227708343625  
TAAATCAA 0.181443493673  
TAAATCCA 0.275270582424  
TAAATCGA 0.0723329962014  
TAAATCTA 0.245099007743  
TAAATGAA 0.154860314094  
TAAATGCA 0.0447445266079  
TAAATGGA 0.0541636646757  
TAAATGTA 0.14458617233  
TAAATTAA 0.100435794419  
TAAATTCA 0.0317507590836  
TAAATTGA 0.0444568738832  
TAAATTTA 0.240843325358  
TAACAAAA 0.116433977889  
TAACAACA 0.0476602120793  
TAACAAGA 0.140126102306  
TAACAATA 0.145796285319  
TAACACAA 0.179540336757  
TAACACCA -0.141031227306  
TAACACGA 0.151144920854

TAACACTA 0.013149216219  
TAACAGAA 0.0685772464818  
TAACAGCA 0.140447169236  
TAACAGGA 0.021995085449  
TAACAGTA 0.202668778057  
TAACATAA 0.0919660627897  
TAACATCA 0.140480583441  
TAACATGA 0.088402050539  
TAACATTA 0.158240960005  
TAACCAA 0.00476410019978  
TAACCACA -0.144101524258  
TAACCAGA 0.0728655188243  
TAACCATA 0.0961202962948  
TAACCCAA 0.0449900107576  
TAACCCCA -0.0518922609795  
TAACCCGA -0.0187802362239  
TAACCCTA -0.0750813756383  
TAACCGAA 0.0622132209269  
TAACCGCA -0.0807301730275  
TAACCGGA -0.0537581457238  
TAACCGTA 0.0150407508027  
TAACCTAA 0.0583629944939  
TAACCTCA -0.034034775736  
TAACCTGA 0.0712434442782  
TAACCTTA -0.0395508134097  
TAACGAAA 0.272773016892  
TAACGACA 0.141367906255  
TAACGAGA 0.213775274979  
TAACGATA 0.112102390596  
TAACGCAA 0.214070286055  
TAACGCCA -0.078325818672  
TAACGCGA 0.0621634971598  
TAACGCTA -0.151892274516  
TAACGGAA 0.0380268185318  
TAACGGCA -0.028153672242  
TAACGGGA 0.0360518342883  
TAACGGTA 0.150943588105  
TAACGTAA 0.19731772377  
TAACGTCA -0.111986541966  
TAACGTGA 0.0539144657402  
TAACGTTA 0.0543923756852  
TAACTAAA -0.00724226958247  
TAACTACA 0.0707945316926  
TAACTAGA 0.114882396525  
TAACTATA -0.0666469096776  
TAACTCAA 0.0252447913236  
TAACTCCA 0.0299627086832  
TAACTCGA -0.0782819355778  
TAACTCTA 0.10803612593  
TAACTGAA 0.136408044084  
TAACTGCA 0.0226102658675  
TAACTGGA 0.119991657336  
TAACTGTA 0.0933047377549  
TAACTTAA -0.0395835337492

TAAC TTCA -0.188848372147  
TAAC TTGA 0.0434704923605  
TAAGAAAA 0.189241256669  
TAAGAACA 0.0125661375661  
TAAGAAGA 0.0988581058504  
TAAGAATA 0.241856377028  
TAAGACAA -0.0934025376755  
TAAGACCA -0.245115465828  
TAAGACGA -0.131477273975  
TAAGACTA -0.0219963442348  
TAAGAGAA 0.131955602691  
TAAGAGCA -0.0337905332719  
TAAGAGGA -0.142994715788  
TAAGAGTA 0.0634913486264  
TAAGATAA 0.219044644284  
TAAGATCA 0.237683959729  
TAAGATGA 0.0959932009356  
TAAGATTA 0.355628889657  
TAAGCAAA -0.0106620371043  
TAAGCACA 0.027496184516  
TAAGCAGA 0.0657012496296  
TAAGCATA -0.0984295937744  
TAAGCCAA -0.230198480024  
TAAGCCCA -0.073091438383  
TAAGCCGA -0.108421832551  
TAAGCCTA -0.142037192509  
TAAGCGAA 0.118098876992  
TAAGCGCA -0.126969622129  
TAAGCGGA -0.0280200591547  
TAAGCGTA 0.124294715581  
TAAGCTAA -0.218180471181  
TAAGCTCA -0.135166271992  
TAAGCTGA -0.238290634541  
TAAGCTTA 0.0245217969034  
TAAGGAAA 0.087743419175  
TAAGGACA -0.260483707252  
TAAGGAGA 0.0945369272651  
TAAGGATA 0.222871297198  
TAAGGCAA 0.113550623087  
TAAGGCCA -0.25800534997  
TAAGGCCGA 0.00696228237722  
TAAGGCTA -0.0422583494085  
TAAGGGAA 0.0691837361962  
TAAGGGCA -0.187967161777  
TAAGGGGA -0.0238538202334  
TAAGGGTA -0.00878911609426  
TAAGGTAA 0.103504265282  
TAAGGTCA -0.185949471997  
TAAGGTGA -0.0624602076884  
TAAGTAAA 0.238818779018  
TAAGTACA 0.0606903665393  
TAAGTAGA 0.115390873564  
TAAGTATA 0.0758853103251  
TAAGTCAA -0.199552025472

TAAGTCCA -0.182832872382  
TAAGTCGA -0.069202609349  
TAAGTCTA -0.0184092226813  
TAAGTGAA 0.0938686908604  
TAAGTGCA -0.130258283397  
TAAGTGGA 0.109068324786  
TAAGTGTA -0.00917437856842  
TAAGTTAA -0.0642686996421  
TAAGTTCA -0.00237656150519  
TAAGTTGA 0.0481624184944  
TAATAAAA 0.148655675646  
TAATAACA 0.106366132524  
TAATAAGA 0.20725959932  
TAATAATA 0.241699475542  
TAATACAA 0.189737974489  
TAATACCA 0.0191442183143  
TAATACGA 0.143990527799  
TAATACTA -0.0376549038978  
TAATAGAA 0.0845475649511  
TAATAGCA 0.0505609343784  
TAATAGGA 0.0781666748987  
TAATAGTA 0.18140281551  
TAATATAA 0.181680717469  
TAATATCA 0.292704080891  
TAATATGA 0.0962488922465  
TAATATTA 0.289783669493  
TAATCAAA 0.2963941714  
TAATCACA 0.259821840216  
TAATCAGA 0.304693846188  
TAATCATA 0.209204904673  
TAATCCAA 0.324044066792  
TAATCCCA 0.325918241893  
TAATCCGA 0.404838745088  
TAATCCTA 0.335875234263  
TAATCGAA 0.318738105269  
TAATCGCA 0.211667368849  
TAATCGGA 0.300229541063  
TAATCGTA 0.256778414455  
TAATCTAA 0.368536893641  
TAATCTCA 0.340248962656  
TAATCTGA 0.388776372698  
TAATGAAA -0.0220606395188  
TAATGACA 0.163804364531  
TAATGAGA 0.0556735428568  
TAATGATA 0.069967893307  
TAATGCAA 0.148383769413  
TAATGCCA -0.173268793836  
TAATGCGA 0.114739072208  
TAATGCTA 0.0217918730841  
TAATGGAA 0.187783475949  
TAATGGCA -0.0805272892928  
TAATGGGA 0.0551837032646  
TAATGGTA 0.163425973007  
TAATGTAA 0.269957645955

TAATGTCA -0.0487571368384  
TAATGTGA 0.109126436448  
TAATTA AAA 0.15584041362  
TAATTACA 0.226161350122  
TAATTAGA 0.0663324112494  
TAATTATA 0.0784539726448  
TAATTCAA 0.0754972179042  
TAATTCCA 0.078062847762  
TAATT CGA 0.000672097177192  
TAATTCTA 0.101993229991  
TAATTGAA 0.142209405372  
TAATTGCA 0.175064216558  
TAATTGGA 0.129215557295  
TAATTGTA 0.0964290383973  
TAATTTAA 0.239116116709  
TAATTTCA 0.325842255895  
TAATTTGA 0.0926502228369  
TACAAAAA 0.0630282772399  
TACAAACA 0.230443667885  
TACAAAGA 0.00946006026775  
TACAAATA 0.280703595772  
TACAACAA 0.0848831434908  
TACAACCA -0.0110688187352  
TACAACGA -0.00634080866011  
TACA ACTA 0.0522246806563  
TACAAGAA 0.173229410312  
TACAAGCA -0.0535397265846  
TACAAGGA 0.0789287360864  
TACAAGTA -0.100582282371  
TACAATAA -0.0582339897693  
TACAATCA 0.255062828736  
TACAATGA -0.0271370159985  
TACACAAA 0.188887597519  
TACACACA -0.131426878056  
TACACAGA 0.295385934072  
TACACATA 0.116736158529  
TACACCAA 0.158299304046  
TACACCCA -0.0650260301671  
TACACCGA 0.0629421934247  
TACACCTA -0.0363721665267  
TACACGAA 0.117242607581  
TACACGCA 0.0203219154401  
TACACGGA 0.145148631144  
TACACGTA -0.0291430657095  
TACACTAA 0.158413842198  
TACACTCA -0.0773117283951  
TACACTGA 0.0079026668088  
TACAGAAA 0.170645897824  
TACAGACA -0.12366352719  
TACAGAGA 0.0652480259583  
TACAGATA 0.30574765637  
TACAGCAA -0.0560193418077  
TACAGCCA -0.0961322788525  
TACAGCGA 0.105991312307



TACAGCTA -0.0643438645833  
TACAGGAA 0.146686908895  
TACAGGCA -0.0483881589779  
TACAGGGA 0.00532448099022  
TACAGGTA -0.00922038363382  
TACAGTAA 0.103476475883  
TACAGTCA -0.0784368603305  
TACAGTGA -0.0339648133889  
TACATAAA 0.187539792312  
TACATACA 0.212410007878  
TACATAGA 0.155407847287  
TACATATA 0.0696186076018  
TACATCAA 0.114363103471  
TACATCCA 0.125394796101  
TACATCGA 0.266317592044  
TACATCTA 0.182687320952  
TACATGAA 0.0810730318307  
TACATGCA -0.00055119768497  
TACATGGA 0.0248294671913  
TACATGTA 0.0794156378601  
TACATTAA 0.0899973220112  
TACATTCA 0.0770857762397  
TACATTGA 0.0517527929917  
TACCAAAA 0.142218122122  
TACCAACA 0.0420700783771  
TACCAAGA 0.0848961434362  
TACCAATA 0.0320039956969  
TACCACAA 0.148656894222  
TACCACCA 0.0882154383192  
TACCACGA -0.137994424689  
TACCACTA 0.0768977089477  
TACCAGAA 0.0423307866254  
TACCAGCA -0.0250691562932  
TACCAGGA 0.0284659804429  
TACCAGTA 0.0577993113768  
TACCATAA 0.0984873433006  
TACCATCA 0.068812610987  
TACCATGA 0.181873519969  
TACCCAAA 0.152788754967  
TACCCACA -0.00756759112635  
TACCCAGA 0.254600264408  
TACCCATA 0.0234117356501  
TACCCCAA -0.122937864269  
TACCCCCA -0.00187073989924  
TACCCCGA -0.0725833333333  
TACCCCTA 0.101895892958  
TACCCGAA 0.157517179301  
TACCCGCA -8.28091177197E-5  
TACCCGGA 0.0181343168895  
TACCCGTA -0.0932562223869  
TACCCTAA -0.00122944521285  
TACCCTCA 0.00949433084176  
TACCCTGA 0.0736904820705  
TACCGAAA 0.237623218951

TACCGACA 0.108048465126  
TACCGAGA 0.225829180771  
TACCGATA 0.236120756033  
TACCGCAA 0.174059803728  
TACCGCCA -0.00265484540156  
TACCGCGA 0.136970639083  
TACCGCTA -0.0783826209137  
TACCGGAA -0.181720394701  
TACCGGCA -0.125454136345  
TACCGGGA -0.0357060528222  
TACCGGTA -0.0715435512542  
TACCGTAA 0.223620937632  
TACCGTCA -0.0394939765649  
TACCGTGA 0.0101099763195  
TACCTAAA 0.190285182979  
TACCTACA 0.162893215848  
TACCTAGA 0.0116593675568  
TACCTATA 0.195010880954  
TACCTCAA 0.106511411678  
TACCTCCA -0.145338973203  
TACCTCGA 0.0268981870276  
TACCTCTA -0.132730685635  
TACCTGAA -0.124552015587  
TACCTGCA -0.0658082504556  
TACCTGGA -0.037290927632  
TACCTTAA 0.0167197038239  
TACCTTCA -0.141006248148  
TACCTTGA 0.114060116514  
TACGAAAA 0.209438786629  
TACGAACA 0.143659291328  
TACGAAGA 0.26852217722  
TACGAATA 0.184410093996  
TACGACAA 0.0540627315387  
TACGACCA -0.145056850608  
TACGACGA 0.154067597532  
TACGACTA 0.109768570308  
TACGAGAA 0.194053724231  
TACGAGCA 0.0773015849956  
TACGAGGA 0.134300408234  
TACGAGTA 0.0245202968232  
TACGATAA 0.11378405673  
TACGATCA 0.205210322949  
TACGATGA 0.140082518559  
TACGCAAA 0.211559862275  
TACGCACA 0.0979151573031  
TACGCAGA 0.235644580562  
TACGCATA 0.174966948992  
TACGCCAA 0.0883361874026  
TACGCCCA 0.0447248839277  
TACGCCGA -0.0304831204179  
TACGCCTA -0.0727907402404  
TACGCGAA 0.224812838921  
TACGCGCA 0.0291416935608  
TACGCGGA 0.0524365893988

TACGCGTA 0.120930055081  
TACGCTAA 0.0774090915695  
TACGCTCA -0.0446471372665  
TACGCTGA 0.0176441532405  
TACGGAAA -0.00387295093875  
TACGGACA -0.0724304835284  
TACGGAGA 0.157245959222  
TACGGATA 0.210833388219  
TACGGCAA 0.0519343919341  
TACGGCCA -0.12779893671  
TACGGCGA 0.0254370799808  
TACGGCTA 0.0319013632322  
TACGGGAA 0.203584036727  
TACGGGCA -0.108406764691  
TACGGGGA 0.0445679457085  
TACGGTAA 0.0794023215609  
TACGGTCA 0.196884124789  
TACGGTGA 0.0546264146558  
TACGTAAA 0.10139047416  
TACGTACA 0.108053963863  
TACGTAGA 0.128844622903  
TACGTATA 0.09907123802  
TACGTCAA 0.132368438385  
TACGTCCA 0.0385352955704  
TACGTCGA 0.0957956212863  
TACGTCTA 0.0282727761394  
TACGTGAA 0.084739877675  
TACGTGCA 0.0826013685296  
TACGTGGA 0.0189778158732  
TACGTTAA 0.0517601923204  
TACGTTCA 0.156693737016  
TACGTTGA -0.00645447289121  
TACTAAAA 0.16257841055  
TACTAACA -0.0770168378539  
TACTAAGA 0.0161886100683  
TACTAATA 0.124002447913  
TACTACAA 0.00740136995324  
TACTACCA -0.139574793817  
TACTACGA 0.0933636482501  
TACTACTA 0.0470877383658  
TACTAGAA 0.0385672569843  
TACTAGCA -0.0483493866798  
TACTAGGA 0.0844151454564  
TACTAGTA 0.059987654321  
TACTATAA 0.212126450976  
TACTATCA 0.106385431074  
TACTATGA 0.0366391139213  
TACTCAA 0.190778063185  
TACTCACA -0.0418505658623  
TACTCAGA 0.175264550265  
TACTCATA 0.0718419943922  
TACTCCAA 0.0703780993777  
TACTCCCA 0.0682492409164  
TACTCCGA -0.00986590734096

TACTCCTA -0.110525826452  
TACTCGAA 0.204439175394  
TACTCGCA -0.163741245691  
TACTCGGA 0.110854519309  
TACTCTAA 0.192523436299  
TACTCTCA 0.0743347823223  
TACTCTGA -0.0779093619074  
TACTGAAA 0.187542312554  
TACTGACA 0.16033557268  
TACTGAGA 0.0836069288923  
TACTGATA 0.195619278399  
TACTGCAA 0.119623921491  
TACTGCCA -0.076235236006  
TACTGCGA -0.0344849551632  
TACTGCTA 0.0144679356298  
TACTGGAA 0.185585402351  
TACTGGCA -0.0805126357567  
TACTGGGA 0.117143076687  
TACTGTAA 0.160380921942  
TACTGTCA 0.0628097924935  
TACTGTGA 0.0405524819425  
TACTTAAA 0.240487289953  
TACTTACA 0.0271192596574  
TACTTAGA 0.0993545412633  
TACTTATA 0.122346386145  
TACTTCAA 0.198305067119  
TACTTCCA -0.0127424345881  
TACTTCGA 0.0947413774177  
TACTTCTA 0.109984688333  
TACTTGAA 0.031353597225  
TACTTGCA 0.0949856198819  
TACTTGGA 0.0380035738672  
TACTTTAA 0.185939519054  
TACTTTCA 0.0277969878592  
TACTTTGA 0.104146267052  
TAGAAAAA -0.0883718430327  
TAGAAACA -0.0617329688906  
TAGAAAGA 0.187273595469  
TAGAAATA 0.279823631107  
TAGAACAA 0.0425832619816  
TAGAACCA -0.127666112455  
TAGAACGA -0.0238042663475  
TAGAACTA -0.124114066281  
TAGAAGAA -0.00988043525635  
TAGAAGCA -0.0723047689885  
TAGAAGGA -0.0111898724451  
TAGAATAA 0.171389602406  
TAGAATCA 0.23872231004  
TAGAATGA -0.0676347100954  
TAGACAAA -0.0592023664482  
TAGACACA -0.244823018105  
TAGACAGA 0.0737987431739  
TAGACATA -0.0132218557959  
TAGACCAA -0.202030927609

TAGACCCA -0.237487291213  
TAGACCGA 0.0247483038659  
TAGACCTA -0.0289303826648  
TAGACGAA 0.0295948164398  
TAGACGCA -0.0519045668349  
TAGACGGA 0.00994822506697  
TAGACTAA -0.0636918338588  
TAGACTCA -0.307650918089  
TAGACTGA -0.0935234553194  
TAGAGAAA 0.0829471329159  
TAGAGACA 0.0888861447271  
TAGAGAGA 0.0206921098892  
TAGAGATA 0.208749223253  
TAGAGCAA 0.0842032755933  
TAGAGCCA -0.311442265795  
TAGAGCGA -0.15143107816  
TAGAGCTA -0.0655328350182  
TAGAGGAA 0.0681957891501  
TAGAGGCA -0.0286260248938  
TAGAGGGA -0.169618512675  
TAGAGTAA -0.00882581744542  
TAGAGTCA -0.172173867572  
TAGAGTGA 0.00720439324161  
TAGATAAA -0.0850565862304  
TAGATACA 0.141331919283  
TAGATAGA -0.0107356912336  
TAGATATA 0.271205185624  
TAGATCAA -0.0140953768646  
TAGATCCA -0.0270495256636  
TAGATCGA -0.0432936468728  
TAGATCTA 0.164156626506  
TAGATGAA 0.0915644466398  
TAGATGCA 0.0590394410415  
TAGATGGA -0.193879230871  
TAGATTAA 0.139410631361  
TAGATTCA 0.265594990775  
TAGATTGA 0.0382884366287  
TAGCAAAA 0.020294078904  
TAGCAACA -0.00750076271556  
TAGCAAGA 0.00697291512308  
TAGCAATA 0.14576583906  
TAGCACAA 0.04896633882  
TAGCACCA -0.0943761215653  
TAGCACGA 0.0614365847768  
TAGCACTA -0.0204354102176  
TAGCAGAA 0.0125551603767  
TAGCAGCA -0.147728461199  
TAGCAGGA -0.0358992908172  
TAGCATAA 0.0414937759336  
TAGCATCA 0.0160199322999  
TAGCATGA -0.00477758568645  
TAGCCAAA -0.0111363586467  
TAGCCACA -0.0386457077274  
TAGCCAGA -0.0268255065973

TAGCCATA -0.117830083436  
TAGCCCAA -0.136101670298  
TAGCCCCA -0.146393510731  
TAGCCCGA 0.0192179474516  
TAGCCCTA -0.218493458888  
TAGCCGAA -0.0597041504725  
TAGCCGCA -0.0754252110802  
TAGCCGGA 0.0665601879295  
TAGCCTAA 0.103448927113  
TAGCCTCA -0.295661668285  
TAGCCTGA -0.169765432099  
TAGCGAAA 0.204381545149  
TAGCGACA -0.118448999753  
TAGCGAGA 0.22920508683  
TAGCGATA 0.156570396716  
TAGCGCAA 0.139286812005  
TAGCGCCA -0.145829883294  
TAGCGCGA 0.0376781485625  
TAGCGCTA -0.23922996131  
TAGCGGAA 0.233764736877  
TAGCGGCA -0.137721201979  
TAGCGGGA 0.0053608007787  
TAGCGTAA 0.250861281241  
TAGCGTCA -0.112683438155  
TAGCGTGA -0.0437784034776  
TAGCTAAA 0.0111061713759  
TAGCTACA 0.0328547278755  
TAGCTAGA -0.00543634593872  
TAGCTATA 0.0179175173988  
TAGCTCAA -0.133010603965  
TAGCTCCA -0.21644084446  
TAGCTCGA 0.129953456717  
TAGCTGAA 0.100008716749  
TAGCTGCA -0.222762123074  
TAGCTGGA -0.222967928962  
TAGCTTAA -0.0717010716579  
TAGCTTCA -0.210081915236  
TAGCTTGA -0.0269339480256  
TAGGAAAA 0.071376693704  
TAGGAACA 0.0316461580928  
TAGGAAGA 0.0719790534532  
TAGGAATA 0.173165487484  
TAGGACAA -0.132908579049  
TAGGACCA -0.240168963674  
TAGGACGA 0.00167797422748  
TAGGACTA -0.202987940189  
TAGGAGAA 0.146762454055  
TAGGAGCA 0.0512878996993  
TAGGAGGA -0.0604548531518  
TAGGATAA 0.000326878096262  
TAGGATCA 0.138917379745  
TAGGATGA -0.124726511993  
TAGGCAAA -0.00248608778689  
TAGGCACA -0.11660708947

TAGGCAGA -0.115474004695  
TAGGCATA -0.0747537114788  
TAGGCCAA 0.00862334462581  
TAGGCCCA -0.332228195678  
TAGGCCGA -0.182840449856  
TAGGCCTA -0.0256695142627  
TAGGCGAA -0.178205297068  
TAGGCGCA -0.125984846724  
TAGGCGGA -0.0788453772382  
TAGGCTAA 0.0605810455596  
TAGGCTCA -0.100493949123  
TAGGCTGA -0.0836077088546  
TAGGGAAA 0.121178795055  
TAGGGACA -0.191058091467  
TAGGGAGA -0.0814894387646  
TAGGGATA 0.185220751674  
TAGGGCAA 0.0294819864322  
TAGGGCCA -0.139350611206  
TAGGGCGA 0.0373059781773  
TAGGGGAA 0.125661375661  
TAGGGGCA -0.0158950332409  
TAGGGGGA -0.0773752974297  
TAGGGTAA -0.0115741278732  
TAGGGTCA -0.063571252161  
TAGGGTGA -0.186192858867  
TAGGTAAA -0.0136112039283  
TAGGTACA -0.0751457221893  
TAGGTAGA 0.0635296958521  
TAGGTATA 0.0485246657446  
TAGGTCAA -0.0931432271944  
TAGGTCCA -0.29218455443  
TAGGTCGA -0.00780752596105  
TAGGTGAA -0.238887613913  
TAGGTGCA -0.11177523107  
TAGGTGGA -0.0950333511516  
TAGGTTAA -0.0140535467299  
TAGGTTCA -0.0798362446014  
TAGGTTGA -0.0710169268261  
TAGTAAAA 0.138728917339  
TAGTAACA -0.0405648453503  
TAGTAAGA 0.0344064620168  
TAGTAATA -0.0421324074209  
TAGTACAA -0.0398565326026  
TAGTACCA -0.172589687727  
TAGTACGA 0.131402499259  
TAGTACTA -0.0134022562298  
TAGTAGAA 0.153369749975  
TAGTAGCA -0.158181395552  
TAGTAGGA -0.107310447024  
TAGTATAA 0.240438452486  
TAGTATCA -0.026430636468  
TAGTATGA -0.17201285176  
TAGTCAA 0.134018566676  
TAGTCACA -0.0571692023974

TAGTCAGA -0.0306779246843  
TAGTCATA 0.0378905135129  
TAGTCCAA 0.0443533337724  
TAGTCCCA -0.124975953665  
TAGTCCGA -0.159951253947  
TAGTCGAA -0.0803730182249  
TAGTCGCA -0.188941571591  
TAGTCGGA 0.0858178489968  
TAGTCTAA 0.0696228237722  
TAGTCTCA -0.224984910837  
TAGTCTGA 0.0354321328433  
TAGTGAAA -0.0159808328805  
TAGTGACA 0.011075984105  
TAGTGAGA 0.00685799907792  
TAGTGATA 0.116236398239  
TAGTGCAA 0.111300467628  
TAGTGCCA -0.186932880994  
TAGTGCGA 0.220352156669  
TAGTGGA -0.069186291459  
TAGTGGCA -0.141936786568  
TAGTGGGA -0.113398483004  
TAGTGTA -0.255919399125  
TAGTGTCA 0.0671872503015  
TAGTGTGA -0.0482859118751  
TAGTTAAA -0.0317855088296  
TAGTTACA 0.0906178722415  
TAGTTAGA -0.104371308458  
TAGTTATA 0.112538145733  
TAGTTCAA -0.0387585412036  
TAGTTCCA -0.188352970232  
TAGTTCGA -0.015222617401  
TAGTTGAA 0.0991553887188  
TAGTTGCA -0.00883620098241  
TAGTTGGA -0.17646413266  
TAGTTTAA -0.028644728661  
TAGTTTCA -0.0320819955545  
TAGTTTGA 0.0794342829747  
TATAAAAA 0.234889513464  
TATAAACA 0.0515958915055  
TATAAAGA 0.0332271447622  
TATAAATA 0.253177836653  
TATAACAA 0.135186831764  
TATAACCA 0.00176458319612  
TATAACGA 0.1012837823  
TATAAGAA 0.180495529981  
TATAAGCA 0.105246547674  
TATAAGGA 0.136199743159  
TATAATA 0.230394275412  
TATAATCA 0.210842214463  
TATAATGA 0.212739529005  
TATACAAA 0.192699722517  
TATACACA -0.0571211100007  
TATACAGA 0.264747853959  
TATACATA 0.144495693118



TATACCAA 0.166738337716  
TATACCCA 0.108199555446  
TATACCGA 0.193524908111  
TATACGAA 0.210639415314  
TATACGCA 0.00320259500757  
TATACGGA 0.106993450628  
TATACTAA 0.183725218995  
TATACTCA 0.0934631074549  
TATACTGA 0.0839096357769  
TATAGAAA 0.241563685433  
TATAGACA 0.0334072596895  
TATAGAGA 0.194309973874  
TATAGATA 0.324068585479  
TATAGCAA 0.134416631558  
TATAGCCA 0.0721173900634  
TATAGCGA 0.0612918222364  
TATAGGAA 0.0765490389784  
TATAGGCA -0.0499870363969  
TATAGGGA -0.0221594293435  
TATAGTAA 0.0854683966717  
TATAGTCA -0.159645809423  
TATAGTGA 0.139907265633  
TATATAAA 0.127886962875  
TATATACA 0.0632070345305  
TATATAGA 0.326445528929  
TATATATA 0.190327301458  
TATATCAA 0.1470123342  
TATATCCA 0.256701000973  
TATATCGA 0.160738540946  
TATATGAA 0.206640710125  
TATATGCA 0.190887298273  
TATATGGA 0.16218238345  
TATATTAA 0.0672540787122  
TATATTCA 0.100825185594  
TATATTGA 0.215910338317  
TATCAAAA 0.150608267445  
TATCAACA 0.138821495504  
TATCAAGA 0.266613976158  
TATCAATA 0.339440274351  
TATCACAA 0.254495159059  
TATCACCA -0.0844406026179  
TATCACGA 0.252630279081  
TATCAGAA 0.214280940828  
TATCAGCA 0.167838395079  
TATCAGGA 0.319455077546  
TATCATAA 0.15329370568  
TATCATCA 0.123574745578  
TATCATGA 0.272227956643  
TATCCAAA 0.317575872038  
TATCCACA 0.240831302553  
TATCCAGA 0.122167885135  
TATCCATA 0.336686864695  
TATCCCAA 0.196310566643  
TATCCCCA 0.164718957477

TATCCCGA 0.204645362047  
TATCCGAA 0.221009705621  
TATCCGCA 0.269020724934  
TATCCGGA 0.393634446735  
TATCCTAA 0.264097455487  
TATCCTCA 0.229664756636  
TATCCTGA 0.274248611386  
TATCGAAA 0.300972578981  
TATCGACA 0.166976772267  
TATCGAGA 0.128576409571  
TATCGATA 0.3194387707  
TATCGCAA 0.331115889181  
TATCGCCA -0.0419918337779  
TATCGCGA 0.235071022415  
TATCGGAA 0.256430781747  
TATCGGCA 0.10740701867  
TATCGGGA 0.280791016268  
TATCGTAA 0.251293710865  
TATCGTCA 0.215269995866  
TATCGTGA 0.161743397221  
TATCTAAA 0.321745383755  
TATCTACA 0.302574346607  
TATCTAGA 0.29995553799  
TATCTCAA 0.348594370897  
TATCTCCA 0.287610593756  
TATCTCGA 0.244712565194  
TATCTGAA 0.29657401462  
TATCTGCA 0.344589077913  
TATCTGGA 0.297742361948  
TATCTTAA 0.263537837956  
TATCTTCA 0.226285357314  
TATCTTGA 0.299918768798  
TATGAAAA 0.0890808187933  
TATGAACA -0.057204878263  
TATGAAGA 0.201547222989  
TATGAATA -0.020340731959  
TATGACAA 0.0731163142989  
TATGACCA -0.0681373759679  
TATGACGA 0.0990032712024  
TATGAGAA 0.128670841021  
TATGAGCA -0.138426415401  
TATGAGGA 0.221142341215  
TATGATAA 0.243785684192  
TATGATCA 0.174331489166  
TATGATGA -0.0103249894673  
TATGCAA 0.186853689364  
TATGCACA 0.0772391755955  
TATGCAGA 0.221029157526  
TATGCATA 0.0698416688738  
TATGCCAA 0.013354059826  
TATGCCCA -0.0869142875959  
TATGCCGA 0.0675998430985  
TATGCGAA 0.194569297639  
TATGCGCA 0.0930673560342

TATGCGGA 0.236969186291  
TATGCTAA 0.0306922215636  
TATGCTCA -0.107935133753  
TATGCTGA 0.200166304419  
TATGGAAA 0.131012755494  
TATGGACA 0.0111443638952  
TATGGAGA 0.0203472409856  
TATGGCAA 0.136863132509  
TATGGCCA -0.0932236874599  
TATGGCGA -0.067059404646  
TATGGGAA 0.0834101736591  
TATGGGCA -0.151825506597  
TATGGGGA 0.0835144569584  
TATGGTAA -0.0225581242179  
TATGGTCA -0.0714439295106  
TATGGTGA -0.00696228237722  
TATGTAAA 0.121209303677  
TATGTACA -0.00319436211552  
TATGTAGA 0.208828614182  
TATGTCAA 0.169803398538  
TATGTCCA 0.0951622041753  
TATGT CGA 0.129584646899  
TATGTGAA 0.201162484358  
TATGTGCA -0.107970492356  
TATGTGGA 0.142680109831  
TATGTTAA 0.0444743073816  
TATGTTCA -0.0819581557757  
TATGTTGA 0.0539203579678  
TATTA AAA 0.162732016526  
TATTAACA 0.172901079424  
TATTAAGA 0.197465270646  
TATTAATA 0.160492635605  
TATTACAA 0.231428239362  
TATTACCA 0.170223276032  
TATTACGA 0.340301104305  
TATTAGAA 0.203794265516  
TATTAGCA 0.0242807584359  
TATTAGGA 0.0180712739529  
TATTATAA 0.210574415587  
TATTATCA -0.0270670047641  
TATTATGA 0.127413764862  
TATTC AAA 0.244525072995  
TATTCACA 0.134015016795  
TATTCAGA 0.0058271468627  
TATTCCAA 0.202267807592  
TATTCCCA 0.226910057676  
TATTC CGA 0.18420670318  
TATTCGAA 0.229576939121  
TATTCGCA 0.204943849607  
TATTCGGA 0.157355156574  
TATTCTAA 0.198467304926  
TATTCTCA 0.204142042603  
TATTCTGA 0.205115738514  
TATTGAAA 0.150455450147

TATTGACA 0.118468572307  
TATTGAGA 0.114658666628  
TATTGCAA 0.100057081385  
TATTGCCA -0.0602835127927  
TATTGCGA 0.277908851859  
TATTGGAA 0.0512210712885  
TATTGGCA -0.0722197201923  
TATTGGGA 0.0733934883312  
TATTGTAA 0.241016663519  
TATTGTCA 0.0915186029957  
TATTGTGA 0.099514767626  
TATTTAAA 0.241082896947  
TATTTACA 0.0692303892511  
TATTTAGA 0.251632856923  
TATTTCAA 0.159007332763  
TATTTCCA 0.228144415904  
TATTTCGA 0.136915739094  
TATTTGAA 0.158861301992  
TATTTGCA 0.276863737172  
TATTTGGA 0.234645656326  
TATTTTAA 0.160622085337  
TATTTTCA 0.136987090825  
TATTTTGA 0.182707422312  
TCAAAAAA 0.260705503963  
TCAAAACA -0.0484656373663  
TCAAAAGA -0.0147051560289  
TCAAACAA 0.017103714788  
TCAAACCA 0.0739499949152  
TCAAACGA -0.00777878305723  
TCAAAGAA 0.128172533523  
TCAAAGCA 0.0908822803016  
TCAAAGGA 0.111934400316  
TCAAATAA -0.0358460119871  
TCAAATCA 0.198415004431  
TCAAATGA 0.18312970647  
TCAACAAA 0.168103961763  
TCAACACA 0.0174814405881  
TCAACAGA 0.095897316694  
TCAACCAA 0.0823456772188  
TCAACCCA -0.0670836940921  
TCAACCGA -0.0442200587451  
TCAACGAA -0.000248402813489  
TCAACGCA 0.0739631893546  
TCAACGGA 0.0335405982596  
TCAACTAA 0.147343570671  
TCAACTCA -0.026843229265  
TCAACTGA -0.00788084340391  
TCAAGAAA 0.094343454302  
TCAAGACA -0.125662109744  
TCAAGAGA 0.102019380239  
TCAAGCAA 0.0494960972236  
TCAAGCCA 0.00985525100092  
TCAAGCGA -0.079638684469  
TCAAGGAA -0.076802954105

TCAAGGCA -0.125078622482  
TCAAGGGA 0.0446602646986  
TCAAGTAA 0.0979980532593  
TCAAGTCA -0.131176192985  
TCAAGTGA -0.0302195168015  
TCAATAAA 0.127713498963  
TCAATACA 0.0886687493826  
TCAATAGA 0.123108102218  
TCAATCAA -0.0204073627475  
TCAATCCA -0.0149245274796  
TCAATCGA 0.0978287119366  
TCAATGAA -0.0853621183678  
TCAATGCA 0.0668156672923  
TCAATGGA 0.0406520128427  
TCAATTAA 0.144267711695  
TCAATTCA -0.13549138725  
TCAATTGA 0.0881639963908  
TCACAAAA 0.133199192248  
TCACAACA 0.171079278834  
TCACAAGA 0.152393576149  
TCACACAA 0.145307800391  
TCACACCA 0.0781905200992  
TCACACGA -0.168963333692  
TCACAGAA 0.191723446603  
TCACAGCA 0.00179202616962  
TCACAGGA 0.0506158203254  
TCACATAA 0.10906251362  
TCACATCA 0.0880013831259  
TCACATGA 0.16601484753  
TCACCAA 0.0728967705109  
TCACCACA 0.0414663329601  
TCACCAGA 0.1021125601  
TCACCCAA 0.162240495111  
TCACCCCA -0.0890749246802  
TCACCCGA -0.1071111111111  
TCACCGAA -0.0148459153152  
TCACCGCA 0.0235163366409  
TCACCGGA -0.0435656680689  
TCACCTAA 0.0129668049793  
TCACCTCA -0.0892033853652  
TCACCTGA -0.101134630192  
TCACGAAA 0.0918049792531  
TCACGACA -0.0473575010985  
TCACGAGA 0.00448967046477  
TCACGCAA 0.135469494391  
TCACGCCA 0.134791451775  
TCACGCGA 0.120876614415  
TCACGGAA 0.08584299326  
TCACGGCA -0.185963689179  
TCACGGGA -0.224576131687  
TCACGTAA 0.107572174751  
TCACGTCA 0.0449570791894  
TCACGTGA 0.0372439520383  
TCACTAAA 0.0907282843985

TCACTACA -0.125603029555  
TCACTAGA -0.162745872708  
TCACTCAA 0.194820798164  
TCACTCCA 0.0146978919995  
TCACTCGA 0.0677347471953  
TCACTGAA -0.00107361294728  
TCACTGCA 0.0743960019177  
TCACTGGA 0.0833196118466  
TCACTTAA 0.0777128815569  
TCACTTCA 0.0106588509078  
TCAGAAAA 5.4885947002E-6  
TCAGAACA -0.0272398954972  
TCAGAAGA 0.171388696769  
TCAGACAA -0.0550796856159  
TCAGACCA -0.168462930631  
TCAGACGA 0.0517986124833  
TCAGAGAA 0.0584480449626  
TCAGAGCA -0.00578852338459  
TCAGAGGA -0.00190151627402  
TCAGATAA 0.237178388273  
TCAGATCA -0.017977624494  
TCAGATGA 0.0789112780207  
TCAGCAA 0.0565876832333  
TCAGCACA 0.068959655979  
TCAGCAGA 0.10344602153  
TCAGCCAA -0.0139250069008  
TCAGCCCA -0.0528010322517  
TCAGCCGA 0.0567358679703  
TCAGCGAA 0.118870200745  
TCAGCGCA -0.0590100219677  
TCAGCGGA 0.0223134252466  
TCAGCTAA 0.00467530623333  
TCAGCTCA -0.0630648985035  
TCAGCTGA -0.00567845151096  
TCAGGAAA 0.225396248892  
TCAGGACA 0.0696599015007  
TCAGGAGA 0.0700658057236  
TCAGGCAA 0.0112643891894  
TCAGGCCA -0.104135451826  
TCAGGCGA 0.00216030101841  
TCAGGGAA 0.0447073930323  
TCAGGGCA 0.115496927346  
TCAGGGGA -0.0334897505557  
TCAGGTAA 0.0283948106286  
TCAGGTCA -0.132334057685  
TCAGTAAA 0.16669475397  
TCAGTACA 0.00445149659192  
TCAGTAGA 0.100040678163  
TCAGTCAA -0.242142453519  
TCAGTCCA -0.176558881315  
TCAGTCGA -0.071768063445  
TCAGTGAA -0.166451706609  
TCAGTGCA -0.110925916781  
TCAGTGGA 0.16137755606

TCAGTTAA 0.178566966426  
TCAGTTCA -0.0551014864932  
TCATAAAA 0.109917341764  
TCATAACA 0.0834759490361  
TCATAAGA 0.0338234648401  
TCATACAA -0.0529249084196  
TCATACCA -0.0352142141124  
TCATACGA 0.204877021196  
TCATAGAA 0.0374776633301  
TCATAGCA -0.0109467132562  
TCATAGGA 0.0971097060309  
TCATATAA 0.230062615315  
TCATATCA 0.171826778328  
TCATATGA 0.00848805056291  
TCATCAAA 0.0819098397571  
TCATCACA 0.0419417238448  
TCATCAGA 0.044561474874  
TCATCCAA 0.129642758561  
TCATCCCA 0.0204364185783  
TCATCCGA -0.0692879868668  
TCATCGAA 0.0125853476476  
TCATCGCA 0.0997036305261  
TCATCGGA -0.117210227347  
TCATCTAA 0.0594879394089  
TCATCTCA -0.0318100866069  
TCATGAAA 0.190343900556  
TCATGACA 0.15479294987  
TCATGAGA 0.299825462689  
TCATGCAA 0.0617712434443  
TCATGCCA 0.0207012568932  
TCATGCGA 0.155958418407  
TCATGGAA 0.224510046053  
TCATGGCA -0.076107480029  
TCATGGGA 0.0600754132912  
TCATGTAA 0.14667238098  
TCATGTCA -0.0312575468177  
TCATTAAA 0.0174930629204  
TCATTACA 0.230097482312  
TCATTAGA 0.176579547601  
TCATTCAA -0.00287862572377  
TCATTCCA -0.123946397998  
TCATTCGA -0.141795359784  
TCATTGAA 0.0519968619703  
TCATTGCA -0.0289339784773  
TCATTGGA 0.0949762468583  
TCATTTAA 0.154410634701  
TCATTTCA -0.0839517682505  
TCCAAAAA 0.128503769994  
TCCAAACA 0.197055191551  
TCCAAAGA 0.0963178954648  
TCCAACAA 0.0985559507344  
TCCAACCA -0.0212441706739  
TCCAACGA 0.0642567013964  
TCCAAGAA 0.0320093559775

TCCAAGCA 0.177654833256  
TCCAAGGA 0.158656062702  
TCCAATAA 0.0263699532372  
TCCAATCA 0.0123877582384  
TCCACAAA 0.0826972527712  
TCCACACA 0.0335260703442  
TCCACAGA 0.0695747856915  
TCCACCAA -0.00748666855599  
TCCACCCA -0.15404601599  
TCCACCGA 0.0101806602321  
TCCACGAA 0.0308949916033  
TCCACGCA -0.186465272069  
TCCACGGA 0.127530242157  
TCCACTAA 0.1762634745  
TCCACTCA 0.0780231179609  
TCCAGAAA -0.0531213226214  
TCCAGACA -0.0652464989683  
TCCAGAGA -0.00800448599869  
TCCAGCAA 0.259702468293  
TCCAGCCA 0.0893103067563  
TCCAGCGA -0.0421085356004  
TCCAGGAA 0.0755536767974  
TCCAGGCA 0.0230227031048  
TCCAGGGA 0.0910958406578  
TCCAGTAA 0.137214708062  
TCCAGTCA -0.0385672569843  
TCCATAAA 0.0959757674371  
TCCATACA 0.10155739253  
TCCATAGA -0.0602592812136  
TCCATCAA 0.0563348975056  
TCCATCCA 0.0262025510988  
TCCATCGA -0.0407611380026  
TCCATGAA 0.0788822221899  
TCCATGCA 0.0569712201996  
TCCATGGA 0.023466854611  
TCCATTAA 0.146371505483  
TCCATTCA 0.0423506489943  
TCCCAAAA 0.0732013875167  
TCCCAACA 0.118770066683  
TCCCAAGA -0.0119569035544  
TCCCACAA 0.0907893016431  
TCCCACCA -0.024166282465  
TCCCACGA 0.109478254188  
TCCCAGAA 0.0115754462227  
TCCCAGCA -0.0430476660904  
TCCCAGGA -0.0330321212209  
TCCCATAA -0.192897544137  
TCCCATCA 0.0955534986753  
TCCCAAAA 0.190325700632  
TCCCCACA 0.0307541440879  
TCCCCAGA -0.0352302106028  
TCCCCCAA -0.0088357645406  
TCCCCCCA -0.135689986283  
TCCCCCGA 0.0577921578959



TCCCCGAA 0.0644252641978  
TCCCCGCA 0.108218621704  
TCCCCGGA 0.227575436201  
TCCCCTAA 0.303684279343  
TCCCCTCA -0.129755393343  
TCCCGAAA 0.1246393445  
TCCCGACA 0.0207276778854  
TCCCGAGA 0.182518559412  
TCCCGCAA 0.151907835518  
TCCCGCCA -0.0471389410254  
TCCCGCGA 0.039377914663  
TCCCGGAA 0.0997588366045  
TCCCGGCA -0.159159896243  
TCCCGGGA 0.129751168292  
TCCCGTAA 0.107008266384  
TCCCGTCA 0.00098935103802  
TCCCTAAA 0.181022939704  
TCCCTACA -0.0884861056236  
TCCCTAGA 0.0999848917143  
TCCCTCAA 0.0461074064927  
TCCCTCCA -0.0773985397982  
TCCCTCGA 0.0421825945685  
TCCCTGAA 0.0243473334011  
TCCCTGCA -0.0193373746852  
TCCCTTAA -0.0845242407279  
TCCCTTCA -0.00806444583267  
TCCGAAAA 0.133600627895  
TCCGAACA 0.0367774178083  
TCCGAAGA 0.0288393648395  
TCCGACAA 0.100180146151  
TCCGACCA -0.0191526576056  
TCCGACGA -0.0221464796154  
TCCGAGAA 0.0495757316297  
TCCGAGCA -0.103044869157  
TCCGAGGA 0.0195816954727  
TCCGATAA 0.0877762119913  
TCCGATCA 0.0478088264349  
TCCGAAA -0.0531945182874  
TCCGCACA -0.0108044106751  
TCCGCAGA 0.108781547884  
TCCGCCAA 0.0521479522903  
TCCGCCCA -0.125165319416  
TCCGCCGA -0.101437908497  
TCCGCGAA 0.22464818108  
TCCGCGCA 0.125002542385  
TCCGCGGA 0.295049402723  
TCCGCTAA 0.226533784667  
TCCGCTCA 0.00239675087736  
TCCGGAAA 0.276084546313  
TCCGGACA 0.0543826715928  
TCCGGAGA 0.240861688381  
TCCGGCAA 0.0046707247977  
TCCGGCCA -0.132176623263  
TCCGGCGA 0.127164296195

TCCGGGAA -3.01842888033E-5  
TCCGGGCA -0.156016986815  
TCCGGTAA 0.0879957769436  
TCCGGTCA -0.0223879777822  
TCCGTAAA 0.0625237894615  
TCCGTACA -0.0825416817588  
TCCGTAGA 0.0291880458595  
TCCGTCAA 0.077114755538  
TCCGTCCA -0.0144665064155  
TCCGTCCA 0.136069908329  
TCCGTGAA 0.0759940726105  
TCCGTGCA -0.0691034823413  
TCCGTTAA 0.0199657141197  
TCCGTTCA 0.0819941016664  
TCCTAAAA 0.0173336708486  
TCCTAACA -0.012002849588  
TCCTAAGA 0.078847355193  
TCCTACAA 0.185519989462  
TCCTACCA -0.0575367425116  
TCCTACGA 0.0420509233861  
TCCTAGAA 0.0770589688086  
TCCTAGCA -0.00699629847  
TCCTAGGA 0.151037037037  
TCCTATAA 0.124420953259  
TCCTATCA 0.0335749589852  
TCCTCAAA 0.202235846178  
TCCTCACA -0.0162160530418  
TCCTCAGA 0.0782720497436  
TCCTCCAA 0.0125246986762  
TCCTCCCA 0.0308937734969  
TCCTCCGA -0.18251773575  
TCCTCGAA -0.0660184951147  
TCCTCGCA 0.185160031611  
TCCTCTAA 0.205405168061  
TCCTCTCA -0.0549875421208  
TCCTGAAA 0.0682449619678  
TCCTGACA -0.0896950439846  
TCCTGAGA 0.132357461196  
TCCTGCAA -0.140559676234  
TCCTGCCA -0.0729781862866  
TCCTGCGA -0.0751514535179  
TCCTGGAA 0.164666656981  
TCCTGGCA 0.0543694905602  
TCCTGTAA 0.155801993458  
TCCTGTCA 0.100769979516  
TCCTTAAA -0.0504031496521  
TCCTTACA -0.0193739668041  
TCCTTAGA 0.155057893743  
TCCTTCAA 0.210682451865  
TCCTTCCA -0.197184219336  
TCCTTCGA -0.0215158426917  
TCCTTGAA 0.00334868449726  
TCCTTGCA 0.0249871950538  
TCCTTTAA 0.00486289490439

TCCTTTCA -0.041596327343  
TCGAAAAA 0.150810116578  
TCGAAACA -0.0824923308254  
TCGAAAGA 0.0946304824721  
TCGAACAA -0.0636224176162  
TCGAACCA 0.00756322236491  
TCGAACGA -0.0188396013085  
TCGAAGAA 0.0645042671716  
TCGAAGCA -0.00129734284428  
TCGAATAA 0.0652978111484  
TCGAATCA 0.184346171168  
TCGACAAA 0.200065375619  
TCGACACA 0.093034424466  
TCGACAGA 0.0385326790928  
TCGACCAA 0.0140720616888  
TCGACCCA -0.0870616704383  
TCGACCGA -0.163218106996  
TCGACGAA -0.147654350396  
TCGACGCA 0.0814110479954  
TCGACTAA -0.0499920096465  
TCGACTCA 0.0883787240115  
TCGAGAAA 0.230417096451  
TCGAGACA -0.107752091155  
TCGAGAGA -0.017773441788  
TCGAGCAA 0.073357391899  
TCGAGCCA -0.263053013798  
TCGAGCGA 0.10009275725  
TCGAGGAA -0.0303184951051  
TCGAGGCA -0.0710475626019  
TCGAGTAA 0.148064155274  
TCGAGTCA -0.0820347798294  
TCGATAAA 0.150403149652  
TCGATACA 0.0927331367222  
TCGATAGA -0.00208374493727  
TCGATCAA 0.101671272981  
TCGATCCA -0.0346398933017  
TCGATCGA 0.19931002285  
TCGATGAA -0.100087167492  
TCGATGCA 0.0618829675727  
TCGATTAA 0.0687060114348  
TCGATTCA 0.00363052605582  
TCGCAAAA 0.257480954576  
TCGCAACA 0.045793442099  
TCGCAAGA 0.110117240277  
TCGCACAA 0.148160039516  
TCGCACCA -0.169328623345  
TCGCACGA 0.0862856478724  
TCGCAGAA 0.0708687347691  
TCGCAGCA -0.00694238642475  
TCGCATAA 0.053222902808  
TCGCATCA 0.181510322084  
TCGCCAAA 0.00989253309859  
TCGCCACA 0.0127225625151  
TCGCCAGA -0.082855872765

TCGCCCAA -0.113928096182  
TCGCCCA 0.038331904755  
TCGCCCGA -0.0622561367116  
TCGCCGAA -0.0236967650836  
TCGCCGCA 0.0530226942181  
TCGCCTAA 0.0948551565741  
TCGCCTCA -0.0236944952089  
TCGCGAAA 0.19375562581  
TCGCGACA 0.011342180948  
TCGCGAGA 0.28673329572  
TCGCGCAA 0.203078003908  
TCGCGCCA 0.0678546422273  
TCGCGCGA 0.197877994802  
TCGCGGAA 0.131112318483  
TCGCGGCA -0.0184005137325  
TCGCGTAA 0.280206480933  
TCGCGTCA 0.0902198073598  
TCGCTAAA 0.116686763616  
TCGCTACA -0.0446500425626  
TCGCTAGA -0.0227035719774  
TCGCTCAA -0.0435037922443  
TCGCTCCA -0.106013717421  
TCGCTGAA -0.113838807936  
TCGCTGCA -0.0698649456984  
TCGCTTAA 0.0907253788154  
TCGCTTCA 0.14731451484  
TCGGAAAA 0.0252338141342  
TCGGAACA -0.0936755682878  
TCGGAAGA 0.117971031337  
TCGGACAA 0.0187984368482  
TCGGACCA -0.175973024731  
TCGGACGA -0.156919398371  
TCGGAGAA 0.185261429837  
TCGGAGCA -0.077733871189  
TCGGATAA -0.0482050760536  
TCGGATCA 0.102581834947  
TCGGCAAA 0.11940929496  
TCGGCACA -0.214226129716  
TCGGCAGA 0.00839987925688  
TCGGCCAA -0.000293449395959  
TCGGCCCA -0.137411764706  
TCGGCCGA 0.248075291456  
TCGGCGAA 0.142649700871  
TCGGCGCA -0.0121688325649  
TCGGCTAA 0.0292075566972  
TCGGCTCA -0.179645920004  
TCGGGAAA 0.0664932442074  
TCGGGACA -0.0069428907646  
TCGGGAGA 0.0317391367513  
TCGGGCAA 0.112609497464  
TCGGGCCA -0.21548455769  
TCGGGGAA 0.165347476045  
TCGGGGCA -0.00133359675985  
TCGGGTAA 0.102395222727

TCGGGTCA -0.227660076492  
TCGGTAAA 0.161575116587  
TCGGTACA -0.0709641620378  
TCGGTAGA 0.0680566531661  
TCGGTCAA -0.105615369419  
TCGGTCCA -0.14607683346  
TCGGTGAA -0.0361869151276  
TCGGTGCA -0.194662583757  
TCGGTTAA 0.0430580254232  
TCGGTTCA -0.137126227927  
TCGTAAAA 0.102455217701  
TCGTAAACA 0.00400392983381  
TCGTAAAGA 0.141341906364  
TCGTACAA 0.0718457046258  
TCGTACCA 0.0280604404048  
TCGTACGA -0.043191282735  
TCGTAGAA -0.125766960281  
TCGTAGCA -0.0602051341653  
TCGTATAA 0.0876116929021  
TCGTATCA 0.273444532262  
TCGTCAAA 0.218660124262  
TCGTCACA 0.0111253814573  
TCGTCAGA 0.0243938227304  
TCGTCCAA -0.0798729645335  
TCGTCCCA -0.125114384734  
TCGTCGAA 0.144301425189  
TCGTCGCA 0.0368151903883  
TCGTCTAA -0.155428850143  
TCGTCTCA -0.0324155441227  
TCGTGAAA 0.194343944483  
TCGTGACA -0.086873476915  
TCGTGAGA 0.209118467846  
TCGTGCAA 0.00224143591353  
TCGTGCCA -0.154379084967  
TCGTGGAA 0.0989452733427  
TCGTGGCA -0.0123661615795  
TCGTGTAA 0.180728720236  
TCGTGTCA -0.0811373052629  
TCGTTAAA 0.132083448346  
TCGTTACA 0.0777816197941  
TCGTTAGA 0.0635661595205  
TCGTTCAA 0.0855185739398  
TCGTTCCA 0.00963734303363  
TCGTTGAA -0.0310337257485  
TCGTTGCA -0.0113201373111  
TCGTTTAA 0.11296625612  
TCGTTTCA 0.079795934049  
TCTAAAAA 0.171296296296  
TCTAAACA 0.0229962372699  
TCTAAAGA 0.0301207269769  
TCTAACAA 0.0769775406705  
TCTAACCA -0.032674593767  
TCTAAGAA 0.187295337992  
TCTAAGCA 0.208997138001

TCTAATAA 0.123658038596  
TCTAATCA 0.0293885200413  
TCTACAAA 0.119626665788  
TCTACACA 0.109681402816  
TCTACAGA 0.299041157584  
TCTACCAA 0.022574590002  
TCTACCCA 0.115512908053  
TCTACGAA 0.0368568370791  
TCTACGCA -0.0250419836017  
TCTACTAA -0.00623717167726  
TCTACTCA 0.00779132102335  
TCTAGAAA 0.176891557055  
TCTAGACA 0.142836560627  
TCTAGAGA 0.160788524688  
TCTAGCAA 0.22968122242  
TCTAGCCA 0.0675594162505  
TCTAGGAA 0.257332762519  
TCTAGGCA -0.19722875817  
TCTAGTAA 0.160465183851  
TCTAGTCA -0.0825566971833  
TCTATAAA 0.0447128367253  
TCTATACA -0.0722088894829  
TCTATAGA -0.0336840829409  
TCTATCAA -0.0223820059956  
TCTATCCA -0.00433706228083  
TCTATGAA -0.0406128564842  
TCTATGCA 0.0665810530475  
TCTATTAA 0.072728197231  
TCTATTCA -0.0287363793072  
TCTCAAAA 0.265433928297  
TCTCAACA 0.0692807229091  
TCTCAAGA 0.161566399837  
TCTCACAA 0.239653945055  
TCTCACCA -0.0226830990212  
TCTCAGAA 0.0978120959424  
TCTCAGCA 0.0905206480933  
TCTCATAA 0.121046391605  
TCTCATCA 0.0438408902707  
TCTCCAAA -0.0130300873128  
TCTCCACA -0.149414436918  
TCTCCAGA 0.0775369372249  
TCTCCCAA -0.139945158845  
TCTCCCCA -0.0323628191831  
TCTCCGAA 0.0043081212201  
TCTCCGCA -0.063638582007  
TCTCCTAA -0.0167347057371  
TCTCCTCA 0.0185258362833  
TCTCGAAA 0.108073173945  
TCTCGACA 0.0909636366278  
TCTCGAGA 0.223  
TCTCGCAA 0.199579024786  
TCTCGCCA 0.0334052592583  
TCTCGGAA 0.0803887022767  
TCTCGGCA 0.155114048521

TCTCGTAA 0.230523721706  
TCTCGTCA -0.00943349632044  
TCTCTAAA 0.0492052514874  
TCTCTACA 0.251424290325  
TCTCTCAA 0.0415948745515  
TCTCTCCA -0.137714012385  
TCTCTGAA 0.0787979602807  
TCTCTGCA 0.0897867988448  
TCTCTTAA 0.0850347976904  
TCTCTTCA -0.0394500699761  
TCTGAAAA 0.17825897462  
TCTGAACA 0.141035549809  
TCTGAAGA 0.101115743902  
TCTGACAA 0.0161642602745  
TCTGACCA -0.042702837753  
TCTGAGAA 0.315966179013  
TCTGAGCA 0.0200330057934  
TCTGATAA 0.057524758396  
TCTGATCA 0.259034226877  
TCTGCAA 0.135037267558  
TCTGCACA -0.0461753229963  
TCTGCAGA 0.187400397736  
TCTGCCAA -0.07177969721  
TCTGCCCA -0.0563238449592  
TCTGCGAA 0.206083009506  
TCTGCGCA 0.265133003065  
TCTGCTAA 0.00879665276829  
TCTGCTCA -0.0716008309968  
TCTGGAAA 0.257938779365  
TCTGGACA -0.013747182002  
TCTGGCAA 0.100837819816  
TCTGGCCA -0.0832736389685  
TCTGGGAA 0.152498075051  
TCTGGGCA 0.0218659654526  
TCTGGTAA 0.036167245362  
TCTGGTCA 0.0836880566008  
TCTGTAAA 0.251680153415  
TCTGTACA -0.0286667827651  
TCTGTCAA 0.0486444956931  
TCTGTCCA -0.0725841414092  
TCTGTGAA 0.143835484862  
TCTGTGCA 0.203066842939  
TCTGTTAA -0.0391047898537  
TCTGTTCA -0.105144117211  
TCTTAAAA 0.245150826582  
TCTTAACA 0.0435437660541  
TCTTAAGA 0.219780392439  
TCTTACAA 0.0327943533338  
TCTTACCA 0.144418648049  
TCTTAGAA 0.110374267273  
TCTTAGCA 0.193847427833  
TCTTATAA 0.23662630617  
TCTTATCA -0.0158809797387  
TCTTCAA 0.0989703396342

TCTTCACA 0.105234407915  
TCTTCCAA -0.107870250673  
TCTTCCCA -0.0451941124173  
TCTTCGAA 0.175834897737  
TCTTCGCA -0.0305013583601  
TCTTCTAA 0.0297662458414  
TCTTCTCA 0.0204383146126  
TCTTGAAA -0.0307827833761  
TCTTGACA 0.119722716196  
TCTTGCAA 0.213105666425  
TCTTGCCA -0.136156623593  
TCTTGGA 0.0276015864484  
TCTTGGCA 0.137290253222  
TCTTGTA 0.0916293442227  
TCTTGTCA -0.0476284552444  
TCTTTAAA 0.215495010374  
TCTTTACA 0.0227747792718  
TCTTTCAA 0.218350018661  
TCTTTCCA 0.041205526419  
TCTTTGAA 0.176838144495  
TCTTTGCA 0.190218226525  
TCTTTTAA 0.106582652353  
TCTTTTCA 0.187116644633  
TGAAAAAA 0.230181744222  
TGAAAACA 0.125699882324  
TGAAACAA 0.109678587894  
TGAAACCA -0.0213458660817  
TGAAAGAA 0.110338064591  
TGAAAGCA 0.0230027003886  
TGAAATA 0.164027428704  
TGAAATCA 0.375266196843  
TGAACAAA -0.0855068168346  
TGAACACA -0.104313822343  
TGAACCAA -0.15366739647  
TGAACCCA -0.105335866752  
TGAACGAA 0.106593997673  
TGAACGCA -0.0303015727334  
TGAACTAA -0.0942899039824  
TGAACTCA -0.17690640417  
TGAAGAAA 0.10071767902  
TGAAGACA -0.0334621475165  
TGAAGCAA -0.0464965932038  
TGAAGCCA -0.0474710850409  
TGAAGGAA -0.0249691281798  
TGAAGGCA -0.0276639063126  
TGAAGTAA 0.0854110673659  
TGAAGTCA -0.197349251815  
TGAATAAA -0.028093371973  
TGAATACA 0.00916275623611  
TGAATCAA -0.143227622999  
TGAATCCA 0.124255807534  
TGAATGAA -0.0353425056417  
TGAATGCA 0.0209728119142  
TGAATTAA 0.118989988803



TGAATTCA -0.0295427612088  
TGACAAAA 0.19524210771  
TGACAACA 0.0480828338712  
TGACACAA 0.0753721267207  
TGACACCA -0.109356796504  
TGACAGAA 0.0236439087047  
TGACAGCA -0.0108372302356  
TGACATAA 0.0200034866997  
TGACATCA -0.0474875005525  
TGACCAA -0.0120460932183  
TGACCACA -0.0831977595463  
TGACCCAA -0.0826692789797  
TGACCCCA -0.245931612165  
TGACCGAA -0.00376544967488  
TGACCGCA -0.116829653776  
TGACCTAA -0.204171948135  
TGACCTCA 0.0203297547696  
TGACGAAA 0.146692720062  
TGACGACA -0.31863259769  
TGACGCAA 0.0979110408571  
TGACGCCA -0.183203401843  
TGACGGAA 0.0229817093545  
TGACGGCA -0.187701999001  
TGACGTAA 0.114398779337  
TGACGTCA 0.0328805311522  
TGACTAAA -0.10798703722  
TGACTACA -0.14501038746  
TGACTCAA -0.0907045518588  
TGACTCCA -0.110422119611  
TGACTGAA -0.0911820237546  
TGACTGCA -0.0683838782969  
TGACTTAA -0.108121104703  
TGAGAAAA 0.15084479828  
TGAGAACA -0.0568782415411  
TGAGACAA 0.0089075491891  
TGAGACCA -0.129657072603  
TGAGAGAA 0.00981166940746  
TGAGAGCA -0.0138885458856  
TGAGATAA -0.0161762607302  
TGAGATCA 0.252152140961  
TGAGCAA 0.162397396598  
TGAGCACA -0.0202489134729  
TGAGCCAA -0.273353240363  
TGAGCCCA -0.276803452963  
TGAGCGAA 0.0945931853608  
TGAGCGCA -0.0215957462264  
TGAGCTAA -0.127111319637  
TGAGCTCA -0.269614685487  
TGAGGAAA 0.0216393299725  
TGAGGACA 0.0210088184446  
TGAGGCAA -0.112974304938  
TGAGGCCA -0.260238860764  
TGAGGGAA 0.068110308281  
TGAGGGCA -0.259495582572

TGAGGTAA 0.0988180311313  
TGAGTAAA 0.066574172272  
TGAGTACA 0.0081343228292  
TGAGTCAA -0.0982125735803  
TGAGTCCA -0.0234718228942  
TGAGTGAA 0.0950202499136  
TGAGTGCA -0.0399051758198  
TGAGTTAA -0.0539638630925  
TGATAAAA 0.134489780237  
TGATAACA -0.0943399241643  
TGATACAA -0.0252974590676  
TGATACCA 0.0328711936596  
TGATAGAA 0.219628861226  
TGATAGCA 0.114769078785  
TGATATAA 0.098650628993  
TGATATCA 0.388939266748  
TGATCAAA 0.0499242573931  
TGATCACA 0.10789447683  
TGATCCAA -0.0158949922276  
TGATCCCA -0.0372771780977  
TGATCGAA -0.0176732749347  
TGATCGCA 0.169980968431  
TGATCTAA -0.0276625838171  
TGATGAAA 0.0246163472305  
TGATGACA 0.0670628183362  
TGATGCAA 0.122821027904  
TGATGCCA -0.234873921917  
TGATGGAA 0.161171240539  
TGATGGCA 0.0867347218792  
TGATGTAA 0.00545703528069  
TGATTAAA -0.00749186853415  
TGATTACA 0.365312630354  
TGATTCAA -0.0381633809365  
TGATTCCA 0.269848764401  
TGATTGAA 0.000513132909656  
TGATTGCA 0.339855155986  
TGATTTAA 0.0633809364694  
TGCAAAAA 0.0520318828411  
TGCAAACA -0.023371057487  
TGCAACAA 0.018263042436  
TGCAACCA -0.0640848317197  
TGCAAGAA 0.0988435987356  
TGCAAGCA -0.196871459695  
TGCAATAA -0.0214878482513  
TGCACAAA 0.174262881732  
TGCACACA -0.242172839506  
TGCACCAA -0.0380965525257  
TGCACCCA 0.00145072224129  
TGCACGAA 0.106064348284  
TGCACGCA -0.208742072114  
TGCACTAA -0.151697264071  
TGCAGAAA -0.0286092998749  
TGCAGACA -0.11677111206  
TGCAGCAA -0.0912947165622

TGCAGCCA -0.0498088409603  
TGCAGGAA -0.00816965852517  
TGCAGGCA 0.136595818866  
TGCAGTAA 0.145429089198  
TGCATAAA 0.0474031351241  
TGCATACA -0.0195308527916  
TGCATCAA 0.1418294035  
TGCATCCA -0.0936280563102  
TGCATGAA 0.0252829311522  
TGCATGCA 0.0340452674897  
TGCATTAA 0.0170494283924  
TGCCAAAA -0.0462953815757  
TGCCAACA -0.074855084044  
TGCCACAA 0.0416210247992  
TGCCACCA -0.035892665042  
TGCCAGAA -0.0141207591074  
TGCCAGCA 0.0525670157413  
TGCCATAA -0.00937426062811  
TGCCAAA 0.0420783112692  
TGCCACA -0.113530089734  
TGCCCAA -0.135473251029  
TGCCCCA -0.161373294565  
TGCCCGAA 0.0797273266153  
TGCCCGCA -0.131584604212  
TGCCCTAA -0.0491781235422  
TGCCGAAA -0.291181117914  
TGCCGACA -0.13766890665  
TGCCGCAA -0.101650643136  
TGCCGCCA -0.0648587105624  
TGCCGGAA -0.119734514046  
TGCCGGCA -0.112398163235  
TGCCGTAA 0.0541474553964  
TGCCTAAA 0.0381488530211  
TGCCTACA -0.212087145969  
TGCCTCAA -0.186534953701  
TGCCTCCA -0.162254926169  
TGCCTGAA -0.0526328788777  
TGCCTTAA -0.0152354248689  
TGCGAAAA 0.00695852775566  
TGCGAACA -0.00420131170934  
TGCGACAA -0.109453719253  
TGCGACCA -0.156379108851  
TGCGAGAA 0.0160093351773  
TGCGAGCA -0.192637473714  
TGCGATAA 0.104168038815  
TGCGCAA 0.170382445279  
TGCGCACA 0.0914023796725  
TGCGCCAA -0.0106010198597  
TGCGCCCA -0.112377759668  
TGCGCGAA 0.0981055598332  
TGCGCGCA 0.00574382409847  
TGCGCTAA 0.117099167929  
TGCGGAAA 0.0299579873439  
TGCGGACA -0.139235956783

TGCGGCAA 0.0490460822411  
TGCGGCCA -0.123588198492  
TGCGGGAA -0.139787226625  
TGCGGTAA 0.0369918749383  
TGCGTAAA 0.0788683615447  
TGCGTACA -0.176340939398  
TGCGTCAA 0.0309446969198  
TGCGTCCA -0.235071906398  
TGCGTGAA 0.0917061845485  
TGCGTTAA 0.00800237107291  
TGCTAAAA 0.0845408241674  
TGCTAACA -0.0728473731586  
TGCTACAA 0.100049394912  
TGCTACCA -0.173075749784  
TGCTAGAA 0.199504598085  
TGCTAGCA 0.0486463070286  
TGCTATAA 0.192951694162  
TGCTCAAA -0.148217656614  
TGCTCACA -0.140098421709  
TGCTCCAA -0.134343976885  
TGCTCCCA -0.187836436367  
TGCTCGAA 0.0362306761496  
TGCTCTAA 0.0141303870557  
TGCTGAAA 0.0997058113241  
TGCTGACA -0.00387750061744  
TGCTGCAA -0.189896877269  
TGCTGCCA -0.0806292290216  
TGCTGGAA 0.0615488317228  
TGCTGTAA 0.00605087675969  
TGCTTAAA 0.0955922304708  
TGCTTACA 0.133477134514  
TGCTTCAA 0.00311623785103  
TGCTTCCA -0.358681566866  
TGCTTGAA -0.0559150585084  
TGCTTTAA 0.0457995784759  
TGGAAAAA 0.116201531242  
TGGAAACA -0.115235382572  
TGGAACAA 0.0967021632066  
TGGAACCA -0.205385620915  
TGGAAGAA -0.0400955936833  
TGGAATAA 0.169369799557  
TGGACAAA 0.0803059578981  
TGGACACA -0.137366755859  
TGGACCAA -0.189452432825  
TGGACCCA -0.413316973296  
TGGACGAA -0.101007107379  
TGGACTAA -0.0616973723205  
TGGAGAAA -0.132562869554  
TGGAGACA -0.0911373982157  
TGGAGCAA -0.0562164326157  
TGGAGCCA -0.333189086833  
TGGAGGAA -0.107256325415  
TGGAGTAA -0.124517744672  
TGGATAAA 0.11012014586

TGGATACA 0.147555678236  
TGGATCAA -0.159522543645  
TGGATCCA -0.0406018109094  
TGGATGAA -0.0905316252827  
TGGATTAA -0.00548173395684  
TGGCAAAA -0.0760379791993  
TGGCAACA -0.22046768337  
TGGCACAA -0.161736382044  
TGGCACCA -0.13732704302  
TGGCAGAA -0.272347886211  
TGGCATAA -0.0121688325649  
TGGCCAAA -0.0822330874929  
TGGCCACA -0.0854087428995  
TGGCCCAA -0.340102119947  
TGGCCCCA -0.196509421702  
TGGCCGAA 0.105586840545  
TGGCCTAA -0.101757877762  
TGGCGAAA 0.0535571600831  
TGGCGACA -0.113986024145  
TGGCGCAA 0.0750468525271  
TGGCGCCA -0.217125789889  
TGGCGGAA -0.0488706947431  
TGGCGTAA 0.161985700879  
TGGCTAAA -0.061910711432  
TGGCTACA -0.242632736929  
TGGCTCAA -0.229561334193  
TGGCTGAA 0.13446174553  
TGGCTTAA -0.165266313964  
TGGGAAAA 0.141295637665  
TGGGAACA -0.195041122798  
TGGGACAA -0.052690509122  
TGGGACCA -0.226526536412  
TGGGAGAA 0.108965968586  
TGGGATAA 0.0889122949748  
TGGGCAAA 0.0181787805268  
TGGGCACA -0.120775599129  
TGGGCCAA -0.290880658436  
TGGGCCCA -0.25479632181  
TGGGCGAA 0.0329768491076  
TGGGCTAA -0.186189296203  
TGGGGAAA 0.0372538365277  
TGGGGACA -0.150773609602  
TGGGGCAA -0.0624388132457  
TGGGGGAA -0.0574246293569  
TGGGGTAA 0.0307529882446  
TGGGTAAA 0.0504525445644  
TGGGTACA -0.0737312999274  
TGGGTCAA -0.243949592282  
TGGGTGAA 0.00259884959055  
TGGGTTAA -0.0662083916468  
TGGTAAAA 0.0155429324113  
TGGTAACA -0.0898071307822  
TGGTACAA -0.0110540297262  
TGGTACCA 0.0655392060043

TGGTAGAA 0.12980526466  
TGGTATAA -0.00645184722444  
TGGTCAAA -0.0220284748293  
TGGTCACA -0.219854066756  
TGGTCCAA 0.0589935060218  
TGGTCGAA -0.164965454416  
TGGTCTAA -0.0257250433599  
TGGTGAAA 0.144882541804  
TGGTGACA 0.0133061177052  
TGGTGCAA -0.146003446157  
TGGTGGAA -0.128364883402  
TGGTGTA 0.281715165691  
TGGTTAAA 0.101192828213  
TGGTTACA 0.0616592384262  
TGGTTCAA -0.132906911653  
TGGTTGAA -0.0508216426266  
TGGTTTAA -0.0684263101276  
TGTA AAAA 0.067923910896  
TGTA AACA -0.202375660592  
TGTA ACAA -0.0100907813563  
TGTA AGAA 0.108221366001  
TGTA ATAA 0.244870908253  
TGTA CAAA 0.101655673046  
TGTA CACA -0.162652011833  
TGTA CCAA 0.0224151206543  
TGTA CGAA 0.107258146529  
TGTA CTA 0.130429752195  
TGTA GAAA 0.0164566308822  
TGTA GACA -0.118580350577  
TGTA GCAA 0.0578283672076  
TGTA GGAA 0.0987590287383  
TGTA GTAA -0.0554046192013  
TGTA TAAA 0.0305495181014  
TGTA TACA 0.00238596522731  
TGTA TCAA 0.161386817149  
TGTA TGAA 0.0768238600189  
TGTA TTAA 0.134780675756  
TGTA AAAA 0.0883834788546  
TGTA AACA 0.0449624453387  
TGTA CAAA 0.182686932715  
TGTA CAGAA 0.0550477242021  
TGTA CATAA -0.0157497130737  
TGTA CAAA 0.0299139966098  
TGTA CACA -0.164144025844  
TGTA CCAA -0.0597171491336  
TGTA CGAA -0.0208298125148  
TGTA CCTAA 0.0240619991657  
TGTA CGAAA 0.0311820853502  
TGTA CGACA -0.123719669291  
TGTA CGCAA 0.221275439636  
TGTA CGGAA 0.112880449784  
TGTA CGTAA 0.204823267909  
TGTA CTA 0.0377391658071  
TGTA CCAA -0.0807491608535

TGTCTGAA -0.0666163032267  
TGTCTTAA -0.179605557525  
TGTGAAAA 0.135773538855  
TGTGAACA -0.0441837490738  
TGTGACAA 0.0188299501161  
TGTGAGAA 0.138857815292  
TGTGATAA 0.0285662400302  
TGTGCAAA 0.020071915698  
TGTGCACA 0.102742938969  
TGTGCCAA -0.183795935913  
TGTGCGAA 0.103605457859  
TGTGCTAA -0.0675475426031  
TGTGGAAA -0.0357517469818  
TGTGGCAA -0.102575835491  
TGTGGGAA -0.00473464762541  
TGTGGTAA 0.156063225488  
TGTGTAAA 0.167278644976  
TGTGTCAA -0.0636002458405  
TGTGTGAA -0.170156895672  
TGTGTTAA -0.0418360379469  
TGTTAAAA 0.147311137456  
TGTTAACA 0.0183761969106  
TGTTACAA -0.0659948626754  
TGTTAGAA 0.0192422239333  
TGTTATAA 0.14257448023  
TGTTCAAA 0.0320655305837  
TGTTCCAA -0.128445640781  
TGTTCGAA 0.122287274999  
TGTTCTAA 0.00935530966651  
TGTTGAAA 0.129322268326  
TGTTGCAA 0.110554018749  
TGTTGGAA -0.0168480234771  
TGTTGTAA 0.0789722952654  
TGTTTAAA 0.170253784934  
TGTTTCAA 0.0888143269798  
TGTTTGAA -0.116967152383  
TGTTTTAA 0.136755625935  
TTAAAAAA 0.181204938939  
TTAAACAA 0.0454157162989  
TTAAAGAA 0.206373396481  
TTAAATAA 0.169739805035  
TTAACAAA 0.0910599025226  
TTAACCAA -0.0140528525562  
TTAACGAA -0.00734922830359  
TTAACTAA -0.0589066525921  
TTAAGAAA 0.0999883776677  
TTAAGCAA 0.141271706659  
TTAAGGAA -0.0136824425337  
TTAAGTAA 0.247837493688  
TTAATAAA 0.13956124174  
TTAATCAA 0.00682376185841  
TTAATGAA 0.0124489706972  
TTAATTAA -0.0148118386971  
TTACAAAA 0.0413346263946

TTACACAA 0.0804134009528  
TTACAGAA 0.322372609717  
TTACATAA 0.267021504314  
TTACCAAA 0.186981379038  
TTACCCAA 0.125226272282  
TTACCGAA 0.176063140793  
TTACCTAA 0.121319897254  
TTACGAAA 0.305662981419  
TTACGCAA 0.208230064068  
TTACGGAA 0.0985486612526  
TTACGTAA 0.326028793191  
TTACTAAA 0.158146528555  
TTACTCAA 0.153085139081  
TTACTGAA 0.117732773524  
TTAGAAAA 0.140719335221  
TTAGACAA 0.0897810643151  
TTAGAGAA 0.084098992294  
TTAGATAA 0.00189589295832  
TTAGCAAA 0.0213371493324  
TTAGCCAA -0.0976987782023  
TTAGCGAA 0.197854226897  
TTAGCTAA -0.0243702081051  
TTAGGAAA 0.0456772187759  
TTAGGCAA 0.121950014818  
TTAGGGAA 0.211725480511  
TTAGTAAA 0.0120139925969  
TTAGTCAA -0.0717330350268  
TTAGTGAA 0.111188266673  
TTATAAAA 0.182736332507  
TTATACAA 0.184516147778  
TTATAGAA 0.154638411381  
TTATATAA 0.184944851208  
TTATCAAA 0.11228189967  
TTATCCAA 0.162327662604  
TTATCGAA 0.138281027026  
TTATGAAA 0.231631630177  
TTATGCAA 0.0159086917386  
TTATGGAA 0.191592695364  
TTATTAAA 0.0545828707519  
TTATTCAA -0.0829487516152  
TTATTGAA 0.0694115128762  
TTCAAAAA 0.00993710070474  
TTCAACAA -0.0589282969988  
TTCAAGAA -0.0975259726079  
TTCACAAA 0.198740429736  
TTCACCAA 0.0101738991472  
TTCACGAA 0.0836764342684  
TTCAGAAA -0.0243998814581  
TTCAGCAA 0.0982513337285  
TTCAGGAA 0.255367338341  
TTCATAAA -0.0392777558234  
TTCATCAA -0.0312081494654  
TTCATGAA -0.0604287580291  
TTCAAAA 0.158809743353



TTCCACAA -0.00564227535182  
TTCCAGAA 0.141645722255  
TTCCAAA 0.22735131397  
TTCCCCAA 0.0739752793695  
TTCCCGAA 0.212324030625  
TTCCGAAA 0.0255748657888  
TTCCGCAA 0.191813519678  
TTCCGGAA 0.234168009661  
TTCTAAA 0.147309962462  
TTCTCAA -0.132805441038  
TTGAAAA 0.182930031694  
TTGACAA 0.237419551669  
TTGAGAA 0.247118387983  
TTGCAAA 0.189169904938  
TTGCCAA 0.233700405329  
TTGCGAA 0.121863791238  
TTGGAAA 0.154635667084  
TTGGCAA 0.102953525199  
TTGTAAA 0.0605218427208  
TTGTCAA 0.175282204756  
TTCTAAAA 0.0864069463655  
TTCTACAA 0.0513016845329  
TTCTAGAA -0.137799940752  
TTCTCAA -0.0138320282423  
TTCTCAA 0.0977902917737  
TTCTGAAA 0.102771926256  
TTCTGCAA 0.207551610419  
TTCTTAAA 0.143478958807  
TTCTTCAA 0.0579794575276  
TTGAAAA 0.130834047623  
TTGAACAA -0.0914081908387  
TTGACAAA 0.142996818387  
TTGACCAA -0.156554269028  
TTGAGAAA 0.180313221856  
TTGAGCAA 0.0182136475237  
TTGATAAA 0.0583788155685  
TTGATCAA -0.124886666607  
TTGAAAA 0.198999978046  
TTGCACAA 0.170309299319  
TTGCCAAA 0.103416481436  
TTGCCCAA -0.0632066014848  
TTGCGAAA 0.0661528627257  
TTGCGCAA 0.248296464547  
TTGCTAAA -0.0356264681991  
TTGAAAA 0.149575058475  
TTGACAA 0.0476826214038  
TTGGCAA 0.0087355317755  
TTGGCAA -0.0661087246334  
TTGGGAAA 0.144680292343  
TTGGTAAA 0.00287216887249  
TTGTAAAA 0.126764583196  
TTGTACAA 0.107197848816  
TTGTCAA 0.189016224286  
TTGTGAAA 0.0582914755769

TTGTTAAA 0.191232403062  
TTTAAAAA 0.0822081714198  
TTTACAAA 0.0608904696042  
TTTAGAAA 0.166276976443  
TTTATAAA 0.182399522358  
TTTC AAAA 0.0967104938159  
TTTCCAAA 0.23698661979  
TTTCGAAA 0.202315486104  
TTTG AAAA -0.00259323289701  
TTTGCAAA 0.223757749337  
TTTTAAAA 0.1756793155
