# Supplementary material for: The intracellular immune receptor Rx1 regulates the DNA-binding activity of a Golden2-like transcription factor
Source: PubMed Central journal article supplement (PMC5836133; doi:10.1074/jbc.ra117.000485), 2017-12-07
Supplement: supp_RA117.000485_133217_1_supp_23414_2z2jtw.pdf [file supp_RA117.000485_133217_1_supp_23414_2z2jtw.pdf]

#8mers all  
AAAAAAA 2.04307712851  
AAAAAAC 1.36946019616  
AAAAAAG 0.908960486355  
AAAAAAT 2.33051472676  
AAAAACA 1.06808882859  
AAAAACC 0.86230092858  
AAAAACG 0.717593283999  
AAAAACT 1.76573449744  
AAAAAGA 1.95481861176  
AAAAAGC 1.17728484684  
AAAAAGG -0.0813076617949  
AAAAAGT 0.000277709440698  
AAAAATA 2.07737695075  
AAAAATC 8.26942937609  
AAAAATG -0.559970068646  
AAAAATT 1.77131200219  
AAAAACA 0.810738779105  
AAAAACAC -0.703789001381  
AAAAACAG 0.591558997081  
AAAAACAT 0.112871192514  
AAAAACCA -0.572359157278  
AAAAACCC 0.304869174184  
AAAAACCG 1.18166324636  
AAAAACCT 1.54881219755  
AAAAACGA 1.00397125626  
AAAAACGC -0.10733886239  
AAAAACGG 0.926797593025  
AAAAACGT -0.263380965897  
AAAAACTA 2.40749374357  
AAAAACTC 1.51709232516  
AAAAACTG 0.541825274905  
AAAAACTT 2.72320670116  
AAAAAGAA 2.4438888773  
AAAAAGAC -0.323434903825  
AAAAAGAG -0.13101452901  
AAAAAGAT 2.82400752555  
AAAAAGCA -0.0131429011391  
AAAAAGCC -0.567841694862  
AAAAAGCG 2.27042685582  
AAAAAGCT 0.371243604113  
AAAAAGGA 0.427168123401  
AAAAAGGC -0.39426038739  
AAAAAGGG 0.0557833746097  
AAAAAGGT 0.0769151061737  
AAAAAGTA -0.27376113691  
AAAAAGTC 1.41037674768  
AAAAAGTG -0.0140411891726  
AAAAAGTT 0.612392617761  
AAAAATA 3.26295227793  
AAAAATAC 0.46155829489  
AAAAATAG 0.356665940256  
AAAAATAT 3.39764552023  
AAAAATCA 4.71385212073

AAAAATCC 7.7557227025  
AAAAATCG 7.89845786061  
AAAAATCT 8.82180969152  
AAAAATGA 1.00810587935  
AAAAATGC 0.54361373203  
AAAAATGG 0.562742999494  
AAAAATGT 0.425530387142  
AAAAATTA 1.63610705839  
AAAAATTC 2.01303163171  
AAAAATTG 0.689328333556  
AAAAATTT 2.11333428616  
AAAACAAA 1.82189467421  
AAAACAAC 0.717858502761  
AAAACAAG 0.607084078977  
AAAACAAT 1.62195053861  
AAAACACA 0.339717129076  
AAAACACC 0.330461743751  
AAAACACG 0.327104873637  
AAAACACT 0.296985057289  
AAAACAGA 1.24371652572  
AAAACAGC 0.662429030736  
AAAACAGG 0.0237135550149  
AAAACAGT 0.774659451393  
AAAACATA 1.3555626498  
AAAACATC -0.0148872245301  
AAAACATG 0.0798183564436  
AAAACATT -0.289058055728  
AAAACCAA 0.353206022037  
AAAACCAC -0.395471150589  
AAAACCAG -0.769742703589  
AAAACCAT 0.287689909968  
AAAACCCA -0.540543731189  
AAAACCCC -1.11802073621  
AAAACCCG 0.864250515471  
AAAACCCCT -0.332824147599  
AAAACCGA 1.35288298269  
AAAACCGC 0.222376563262  
AAAACCGG 0.658074779866  
AAAACCGT 0.805774774897  
AAAACCTA 1.35774227337  
AAAACCTC 0.369911056789  
AAAACCTG 0.624493171696  
AAAACCTT 1.85328125364  
AAAACGAA 0.846116755163  
AAAACGAC 0.315537047182  
AAAACGAG -0.00212175008965  
AAAACGAT 1.49344726071  
AAAACGCA -0.165120953896  
AAAACGCC -0.74903648784  
AAAACGCG 0.774845978873  
AAAACGCT 0.301592452598  
AAAACGGA 0.803405292997  
AAAACGGC 0.0984484130833  
AAAACGGG 0.487086953813

AAAACGGT -0.451286376432  
AAAACGTA 0.574126588426  
AAAACGTC -0.269671272089  
AAAACGTG -0.53124213035  
AAAACGTT 0.335754252829  
AAAACATA 1.79852669466  
AAAACATC 1.22300697912  
AAAACATG 1.81893230139  
AAAACATC 1.28611905174  
AAAACATC 0.302414339308  
AAAACATC -0.149431411386  
AAAACATC 1.66138444647  
AAAACATC -0.258818537035  
AAAACATG -0.138701501347  
AAAACATG 0.166814273679  
AAAACATG -0.240415186228  
AAAACATG 0.381035464123  
AAAACATG 2.90718212757  
AAAACATC 0.604241824859  
AAAACATG -0.234726930787  
AAAACATC 1.9473210814  
AAAAGAAA 1.20107917491  
AAAAGAAC 0.133533274529  
AAAAGAAG 0.416140727012  
AAAAGAAAT 2.85891835019  
AAAAGACA 0.205111946068  
AAAAGACC -1.17008043109  
AAAAGACG 1.99416737483  
AAAAGACT 0.250985007391  
AAAAGAGA -0.0214721025801  
AAAAGAGC -0.129999453123  
AAAAGAGG -0.342764230338  
AAAAGAGT -0.275384925244  
AAAAGATA 2.54657308798  
AAAAGATC 3.70282154877  
AAAAGATG 0.913741710287  
AAAAGATT 7.26393092608  
AAAAGCAA 1.46922158783  
AAAAGCAC 0.416250020457  
AAAAGCAG 0.13469823857  
AAAAGCAT -0.038945522299  
AAAAGCCA -0.708118687249  
AAAAGCCC -1.17347935315  
AAAAGCCG -0.672098065731  
AAAAGCCT -0.292739891686  
AAAAGCGA 0.824394838993  
AAAAGCGC 0.874098583538  
AAAAGCGG -0.0415081933747  
AAAAGCGT 2.22757445715  
AAAAGCTA 1.01759400767  
AAAAGCTC -0.721183105285  
AAAAGCTG -0.454069508  
AAAAGCTT 1.42190731028  
AAAAGGAA 1.00844791579

AAAAGGAC 0.253748153873  
AAAAGGAG 0.400173891418  
AAAAGGAT 2.05586133897  
AAAAGGCA -1.28334445547  
AAAAGGCC -0.566930083437  
AAAAGGCG -0.03066586722  
AAAAGGCT -0.943650850507  
AAAAGGGA -0.715821272936  
AAAAGGGC -0.915499773425  
AAAAGGGG -0.780554219401  
AAAAGGGT -0.559017654335  
AAAAGGTA 0.571561419215  
AAAAGGTC -0.0813076617949  
AAAAGGTG -0.0414453236213  
AAAAGGTT 0.539653145741  
AAAAGTAA 0.644125189009  
AAAAGTAC -0.447080972825  
AAAAGTAG -0.705766275945  
AAAAGTAT 1.31092179401  
AAAAGTCA -0.0249488832166  
AAAAGTCC -0.329997923186  
AAAAGTCG 2.42111129053  
AAAAGTCT 0.314246759991  
AAAAGTGA 1.36433568672  
AAAAGTGC -0.173043375541  
AAAAGTGG -0.233146651653  
AAAAGTGT -0.152500579516  
AAAAGTTA 0.414411600614  
AAAAGTTC 0.0689510489298  
AAAAGTTG 0.0471881216955  
AAAAGTTT 2.01391826178  
AAAATAAA 3.46546241546  
AAAATAAC 2.00830619948  
AAAATAAG 1.27229145319  
AAAATAAT 3.0604421404  
AAAATACA 1.77764727483  
AAAATACC 1.79886644115  
AAAATACG 3.7584061134  
AAAATACT 1.85836100481  
AAAATAGA 1.67336217539  
AAAATAGC 1.12060838865  
AAAATAGG 0.0134387220651  
AAAATAGT -0.223407252498  
AAAATATA 3.58136301411  
AAAATATC 7.59491748655  
AAAATATG 2.55894947775  
AAAATATT 4.21768361021  
AAAATCAA 5.17917448188  
AAAATCAC 4.21847885014  
AAAATCAG 5.26954038444  
AAAATCAT 3.23138874721  
AAAATCCA 10.6513215984  
AAAATCCC 6.67097505468  
AAAATCCG 10.1953372693

AAAATCCT 10.3737006334  
AAAATCGA 5.89156768783  
AAAATCGC 7.7127789137  
AAAATCGG 4.89004751924  
AAAATCGT 5.76883447932  
AAAATCTA 10.9953911048  
AAAATCTC 9.80891894683  
AAAATCTG 18.908566733  
AAAATCTT 10.3102232084  
AAAATGAA 0.387444848126  
AAAATGAC 0.971144917848  
AAAATGAG -0.25548768917  
AAAATGAT 2.43135614585  
AAAATGCA 0.290827985012  
AAAATGCC -0.0881048813963  
AAAATGCG 1.76297863719  
AAAATGCT -0.0397024574762  
AAAATGGA 0.208941172045  
AAAATGGC 0.586815245188  
AAAATGGG 0.0636500045536  
AAAATGGT 0.313567267026  
AAAATGTA 0.0395296697432  
AAAATGTC 0.574405546935  
AAAATGTG 0.35471073256  
AAAATGTT 1.21967529854  
AAAATTA 2.08320218731  
AAAATTAC 1.93660470293  
AAAATTAG 0.997186527343  
AAAATTAT 1.14502329531  
AAAATTCA 1.66462244695  
AAAATTCC 2.27455523357  
AAAATTCCG 3.61374343526  
AAAATTCT 2.31161965953  
AAAATTGA 1.65234306812  
AAAATTGC 1.05763537892  
AAAATTGG 0.543686386149  
AAAATTGT 0.464812325075  
AAAATTTA 2.56910127751  
AAAATTTTC 2.81209537269  
AAAATTTG 1.38153285424  
AAAATTTT 3.32959671471  
AAACAAAA 2.70294473724  
AAACAAAC 0.289455467514  
AAACAAAG 0.240434338603  
AAACAAAT 2.13885399343  
AAACAACA 0.625614002003  
AAACAACC -0.0672693871143  
AAACAACG 0.0537794532633  
AAACAACT 1.76020195914  
AAACAAGA 0.916146374267  
AAACAAGC 0.40404392028  
AAACAAGG -0.265566418452  
AAACAAGT -0.780533817958  
AAACAATA 1.6669271855

AAACAATC 1.74584558848  
AAACAATG 0.0640796839281  
AAACAATT 0.487226016711  
AAACACAA -0.228300476189  
AAACACAC 0.619677598396  
AAACACAG 0.215584964466  
AAACACAT -0.402748012283  
AAACACCA 0.349456320054  
AAACACCC -1.29562029527  
AAACACCG 0.876176199893  
AAACACCT 0.907943120511  
AAACACGA 1.32198395612  
AAACACGC 0.0168007966282  
AAACACGG 0.135116676333  
AAACACGT 0.911168838489  
AAACACTA 3.02402722976  
AAACACTC 0.535852231972  
AAACACTG 0.546817799498  
AAACACTT 2.06954009026  
AAACAGAA 1.45343087082  
AAACAGAC 0.389073840909  
AAACAGAG 0.729361169504  
AAACAGAT 1.47367076787  
AAACAGCA -0.187851492435  
AAACAGCC -0.655919304941  
AAACAGCG 0.253028274378  
AAACAGCT 0.78982063816  
AAACAGGA 1.23354682265  
AAACAGGC -0.735450375757  
AAACAGGG 0.109780998408  
AAACAGGT -0.467037539627  
AAACAGTA 0.436863597001  
AAACAGTC 0.487867621281  
AAACAGTG -0.390107444637  
AAACAGTT 0.310172300341  
AAACATAA 0.815878069181  
AAACATAC -0.127060188061  
AAACATAG -0.303951941954  
AAACATAT 1.32447085041  
AAACATCA 0.394890125815  
AAACATCC 0.40084422455  
AAACATCG 1.74122133076  
AAACATCT 1.23375645789  
AAACATGA 1.70215235891  
AAACATGC -0.13785338421  
AAACATGG 0.36439891993  
AAACATGT -0.827490445727  
AAACATTA 0.381657916317  
AAACATTC 1.00682204568  
AAACATTG -0.20594507439  
AAACATTT 2.62351713089  
AAACCAA 1.07432459215  
AAACCAAC 0.923737584728  
AAACCAAG 0.523137969317

AAACCAAT 1.04215567983  
AAACCACA 0.816784684335  
AAACCACC -0.822790203034  
AAACCACG 0.221286543298  
AAACCACT 0.79546746618  
AAACCAGA -0.0588839776155  
AAACCAGC 1.64177616145  
AAACCAGG -1.42182029187  
AAACCAGT -0.0949408221041  
AAACCATA 1.29227487495  
AAACCATC -0.538222338405  
AAACCATG 0.643966973736  
AAACCATT 0.287689909968  
AAACCCAA -0.194941202114  
AAACCCAC -0.797331908272  
AAACCCAG -0.45671982201  
AAACCCAT -1.07726115089  
AAACCCCA -1.28586236828  
AAACCCCC -1.48163649054  
AAACCCCG 0.0387802289737  
AAACCCCT -0.899303733862  
AAACCCGA -0.238729360852  
AAACCCGC -0.275827511654  
AAACCCGG -0.585555768339  
AAACCCGT 0.465440606254  
AAACCCCTA 0.20197116471  
AAACCCCTC -0.299982404011  
AAACCCCTG -0.550738207434  
AAACCCCTT -0.511505607685  
AAACCGAA 1.26055021447  
AAACCGAC -0.0937529584844  
AAACCGAG -0.629055184203  
AAACCGAT 1.23204565115  
AAACCGCA 0.222376563262  
AAACCGCC -0.572987438457  
AAACCGCG 0.472619832469  
AAACCGCT -0.539310901123  
AAACCGGA -0.305192474605  
AAACCGGC 0.464004594468  
AAACCGGG -0.745959200769  
AAACCGGT -0.26507428568  
AAACCGTA 0.607190666109  
AAACCGTC 0.109581147536  
AAACCGTG -0.363310149034  
AAACCGTT -0.224345927062  
AAACCTAA 0.497795213341  
AAACCTAC 0.595530200447  
AAACCTAG 0.7176159754  
AAACCTAT 0.642211825089  
AAACCTCA 0.113633123963  
AAACCTCC -0.829135884572  
AAACCTCG 0.562772977124  
AAACCTCT -0.866639566102  
AAACCTGA 0.689161166629

AAACCTGC 0.313836649347  
AAACCTGG -0.632617109638  
AAACCTGT -0.147234300864  
AAACCTTA 1.00287603185  
AAACCTTC -0.348647340379  
AAACCTTG 0.35415822817  
AAACCTTT 0.268465505162  
AAACGAAA 0.751613939553  
AAACGAAC -0.126911548975  
AAACGAAG -0.547773752835  
AAACGAAT 1.37200454757  
AAACGACA 0.16458468739  
AAACGACC -0.53074562584  
AAACGACG 0.672472577938  
AAACGACT 0.925176302827  
AAACGAGA 1.09672745853  
AAACGAGC 0.089292120482  
AAACGAGG -0.593347662384  
AAACGAGT -0.358687556732  
AAACGATA 1.70215235891  
AAACGATC 1.83546163392  
AAACGATG -0.464989276368  
AAACGATT 2.15125807088  
AAACGCAA 1.77216074386  
AAACGCAC 0.373154053541  
AAACGCAG 0.331940223847  
AAACGCAT 0.500958061566  
AAACGCCA -0.967812196382  
AAACGCCC -1.30540237092  
AAACGCCG -0.0459935963802  
AAACGCCT -0.290490944844  
AAACGCGA 0.798357393058  
AAACGCGC 1.31656612389  
AAACGCGG 0.176976690513  
AAACGCGT 1.67728924503  
AAACGCTA 0.51770847912  
AAACGCTC 0.2136266341  
AAACGCTG 1.07116153574  
AAACGCTT -0.168681838441  
AAACGGAA 0.253831008714  
AAACGGAC -0.274918190187  
AAACGGAG 0.468650710883  
AAACGGAT 3.075226525  
AAACGGCA -0.70700535135  
AAACGGCC -0.819678774773  
AAACGGCG -1.12011583952  
AAACGGCT -1.01904459192  
AAACGGGA 0.0298414823735  
AAACGGGC 0.449298068434  
AAACGGGG -0.635010323828  
AAACGGGT -0.955801783517  
AAACGGTA 0.911997803252  
AAACGGTC -0.498640415986  
AAACGGTG -0.878413072412



AAACGGTT -0.456948609623  
AAACGTAA 0.533990704372  
AAACGTAC -0.349569777059  
AAACGTAG 0.127910803334  
AAACGTAT 1.8569091715  
AAACGTCA 1.15548153307  
AAACGTCC -0.950616486104  
AAACGTCCG 1.87293450511  
AAACGTCT -0.263380965897  
AAACGTGA -0.152676073562  
AAACGTGC -0.523349269979  
AAACGTGG -0.354047477479  
AAACGTGT 0.415644847036  
AAACGTTA 0.842201759854  
AAACGTTC -0.296586188258  
AAACGTTG 0.173089382878  
AAACGTTT 0.895388322198  
AAACTAAA 2.19557312811  
AAACTAAC 0.776433127881  
AAACTAAG 0.627209894486  
AAACTAAT 1.54032790351  
AAACTACA 0.0167999639163  
AAACTACC 0.943417899335  
AAACTACG 1.7963791305  
AAACTACT 1.96248768079  
AAACTAGA 1.69893475987  
AAACTAGC 0.692830303729  
AAACTAGG 0.117725903277  
AAACTAGT -0.553583584222  
AAACTATA 1.07281904891  
AAACTATC 1.97853445673  
AAACTATG 0.892223184014  
AAACTATT 1.26287264814  
AAACTCAA 0.7718311452  
AAACTCAC -0.116746634005  
AAACTCAG 0.302414339308  
AAACTCAT -0.597606359557  
AAACTCCA -0.714704189833  
AAACTCCC -1.13864159898  
AAACTCCG -0.493704932163  
AAACTCCT 0.50730103679  
AAACTCGA 2.91684866443  
AAACTCGC 0.638918657441  
AAACTCGG -0.198732956052  
AAACTCGT 0.93641270992  
AAACTCTA 0.271574643465  
AAACTCTC -0.0708263162775  
AAACTCTG -0.675905016662  
AAACTCTT 0.804810078084  
AAACTGAA 0.551346087169  
AAACTGAC -0.223330851175  
AAACTGAG 0.401674646559  
AAACTGAT 0.759669803291  
AAACTGCA -0.944200648583

AAACTGCC -0.552481073579  
AAACTGCG 0.166814273679  
AAACTGCT -0.0962777411657  
AAACTGGA -0.114068215966  
AAACTGGC -0.78765641976  
AAACTGGG -0.547026185667  
AAACTGGT -0.373724877594  
AAACTGTA 0.25894032116  
AAACTGTC -0.288845714177  
AAACTGTG 0.636439673918  
AAACTGTT 0.172228150527  
AAACTTAA 0.66922604216  
AAACTTAC -0.341650061728  
AAACTTAG 0.384692110544  
AAACTTAT 0.895254463749  
AAACTTCA -0.290230930532  
AAACTTCC -0.479925214548  
AAACTTCG 1.39178353855  
AAACTTCT 0.186471688707  
AAACTTGA -0.0966278965474  
AAACTTGC 0.421897889368  
AAACTTGG -1.04201016341  
AAACTTGT 0.192946856955  
AAACTTTA 0.379016762139  
AAACTTTC 0.822202516564  
AAACTTTG 0.844005622151  
AAAGAAAA 0.495772555975  
AAAGAAAC 0.400487407473  
AAAGAAAG 1.10801216291  
AAAGAAAT 2.79937819555  
AAAGAACA 1.57590427319  
AAAGAACC -0.437660085996  
AAAGAACG -0.267879692294  
AAAGAACT 0.540053680197  
AAAGAAGA -0.144968075248  
AAAGAAGC 0.406736702601  
AAAGAAGG 0.415644847036  
AAAGAAGT 1.06777885156  
AAAGAATA 0.864971644033  
AAAGAATC 8.47751285481  
AAAGAATG -0.105394271771  
AAAGAATT 2.26001067001  
AAAGACAA 1.08463648078  
AAAGACAC -0.325629516212  
AAAGACAG 0.243437097953  
AAAGACAT 0.593972404537  
AAAGACCA -0.589328994436  
AAAGACCC -1.10946795161  
AAAGACCG -1.31782539256  
AAAGACCT -0.926167854601  
AAAGACGA 0.179246663333  
AAAGACGC -0.433920168378  
AAAGACGG -0.14614219912  
AAAGACGT 1.35857873254

AAAGACTA 1.05105945252  
AAAGACTC 0.236735848405  
AAAGACTG 1.02060093058  
AAAGACTT 0.946691081896  
AAAGAGAA 0.314014016996  
AAAGAGAC -0.533683641834  
AAAGAGAG 0.361793780544  
AAAGAGAT 3.22618887734  
AAAGAGCA 0.0453744750334  
AAAGAGCC -0.933062085146  
AAAGAGCG -0.449859732656  
AAAGAGCT -0.684721562781  
AAAGAGGA -0.225482162539  
AAAGAGGC -0.298112549291  
AAAGAGGG -0.97665372386  
AAAGAGGT -0.186755851665  
AAAGAGTA -0.132210511571  
AAAGAGTC 0.169282848303  
AAAGAGTG 0.216582345224  
AAAGAGTT 0.67630326116  
AAAGATAA 1.50356429474  
AAAGATAC 3.3597265236  
AAAGATAG 1.13645281558  
AAAGATAT 6.11477592217  
AAAGATCA 1.38030689405  
AAAGATCC 3.21233255022  
AAAGATCG 2.86763018278  
AAAGATCT 5.94546267988  
AAAGATGA 0.528412783267  
AAAGATGC 0.295653967211  
AAAGATGG 0.496026741303  
AAAGATGT 0.202609230254  
AAAGATTA 3.6058543221  
AAAGATTC 7.17763490325  
AAAGATTG 4.86151401919  
AAAGATTT 8.6980768123  
AAAGCAAA 0.662309952925  
AAAGCAAC 0.359920594976  
AAAGCAAG 1.41805934828  
AAAGCAAT 1.80888167614  
AAAGCACA 0.497254366919  
AAAGCACC -0.579009611395  
AAAGCACG -0.621714828221  
AAAGCACT 0.335004603882  
AAAGCAGA -0.370489167072  
AAAGCAGC 0.0908850984732  
AAAGCAGG -0.179163392136  
AAAGCAGT 0.858658021906  
AAAGCATA 0.0485949885623  
AAAGCATC -0.191096779145  
AAAGCATG -0.038945522299  
AAAGCATT -0.332700073516  
AAAGCCAA -0.428926394718  
AAAGCCAC -1.35422010993

AAAGCCAG -0.67679456122  
AAAGCCAT -0.480425258084  
AAAGCCCA -0.918470473364  
AAAGCCCC -1.65925915736  
AAAGCCCG -0.888131029235  
AAAGCCCT -1.04141581524  
AAAGCCGA -0.819141675555  
AAAGCCGC -0.337341610015  
AAAGCCGG -0.716797835894  
AAAGCCGT -0.866846911381  
AAAGCCTA -0.112181707006  
AAAGCCTC -0.311435940749  
AAAGCCTG -0.213981993931  
AAAGCCTT -0.27784600546  
AAAGCGAA 0.353892801231  
AAAGCGAC -0.675229062724  
AAAGCGAG -0.00345242381149  
AAAGCGAT 3.01953828773  
AAAGCGCA 0.348639013259  
AAAGCGCC -0.920938215276  
AAAGCGCG 1.29144549383  
AAAGCGCT -0.0499131716046  
AAAGCGGA -0.0415081933747  
AAAGCGGC -0.625075237361  
AAAGCGGG -0.598480498943  
AAAGCGGT -0.0327872009536  
AAAGCGTA 1.41764257594  
AAAGCGTC 0.39569077837  
AAAGCGTG -0.362447875793  
AAAGCGTT 0.0537794532633  
AAAGCTAA -0.687118524176  
AAAGCTAC -0.635941503984  
AAAGCTAG 1.04453536245  
AAAGCTAT -0.353695864851  
AAAGCTCA 0.0892596447153  
AAAGCTCC -1.12748992033  
AAAGCTCG -0.714363610639  
AAAGCTCT -0.945082490555  
AAAGCTGA 0.933611258688  
AAAGCTGC -0.933677251111  
AAAGCTGG -0.454571008782  
AAAGCTGT 1.61424545478  
AAAGCTTA 1.00939137845  
AAAGCTTC 0.435595793032  
AAAGCTTG 0.670246114318  
AAAGCTTT -0.243069871976  
AAAGGAAA -0.184735900614  
AAAGGAAC -0.605426149452  
AAAGGAAG -0.306248353378  
AAAGGAAT 3.0868203737  
AAAGGACA 1.00358695969  
AAAGGACC -0.583803117828  
AAAGGACG -0.549225169792  
AAAGGACT -0.304585219404

AAAGGAGA 0.152989173262  
AAAGGAGC 0.0742572977559  
AAAGGAGG -0.994222280921  
AAAGGAGT -0.000455909801446  
AAAGGATA 2.05123853849  
AAAGGATC 1.86836832904  
AAAGGATG 0.381683730388  
AAAGGATT 6.50460544919  
AAAGGCAA -0.431774894176  
AAAGGCAC -1.64464735231  
AAAGGCAG 0.57237248067  
AAAGGCAT 0.0474689538061  
AAAGGCCA -0.914574214075  
AAAGGCCC -1.07671655727  
AAAGGCCG -0.869128958524  
AAAGGCCT -0.541568175085  
AAAGGCCG -0.53078809415  
AAAGGCCG -0.858709233692  
AAAGGCCG -0.754706839973  
AAAGGCCG 0.354155938213  
AAAGGCTA -0.101670383858  
AAAGGCTC -0.681404038308  
AAAGGCTG -0.348108575737  
AAAGGCTT -0.438667667475  
AAAGGGAA -0.0381190556726  
AAAGGGAC -0.984445826083  
AAAGGGAG 0.363327635985  
AAAGGGAT 1.30751017308  
AAAGGGCA -0.900160802653  
AAAGGGCC -1.3277862931  
AAAGGGCG -1.06062335763  
AAAGGGCT -1.32942881745  
AAAGGGGA -0.838930242717  
AAAGGGGC -1.07726115089  
AAAGGGGG -0.960116480569  
AAAGGGGT -0.910064037888  
AAAGGGTA -0.415377130139  
AAAGGGTC -0.792713063174  
AAAGGGTG -0.39234598258  
AAAGGGTT -0.628371527679  
AAAGGTAA 0.977096726626  
AAAGGTAC -0.707890107814  
AAAGGTAG 0.427356524483  
AAAGGTAT 0.860720024912  
AAAGGTCA 0.257828234329  
AAAGGTCC -0.824254110671  
AAAGGTCC 0.747115421334  
AAAGGTCT -0.384619456425  
AAAGGTGA 1.37277147529  
AAAGGTGC -1.25067320966  
AAAGGTGG -0.649247824847  
AAAGGTGT 0.502584556214  
AAAGGTTA 0.539653145741  
AAAGGTTC 1.17246136278

AAAGGTTG -0.434662739274  
AAAGTAAA 0.841962563342  
AAAGTAAC -0.276480357836  
AAAGTAAG 0.725715140161  
AAAGTAAT 2.74867540482  
AAAGTACA 0.427135439456  
AAAGTACC -0.144276299782  
AAAGTACG 0.889429643546  
AAAGTACT 0.456473963802  
AAAGTAGA -0.138469174709  
AAAGTAGC -0.573832641102  
AAAGTAGG -0.415690229838  
AAAGTAGT 0.180078334409  
AAAGTATA 1.91857586433  
AAAGTATC 3.23571843308  
AAAGTATG 0.13804199347  
AAAGTATT 1.35895386928  
AAAGTCAA -0.265200025187  
AAAGTCAC -0.733443123562  
AAAGTCAG 1.22928312921  
AAAGTCAT -0.0249488832166  
AAAGTCCA -0.2226523991  
AAAGTCCC -0.565927290052  
AAAGTCCG -0.805470210495  
AAAGTCCT -0.918928256767  
AAAGTCGA 0.469667868549  
AAAGTCGC 0.728780352908  
AAAGTCGG -0.362591726785  
AAAGTCGT 1.58014173621  
AAAGTCTA 0.521966551759  
AAAGTCTC 0.241410485205  
AAAGTCTG 0.293709376593  
AAAGTCTT 0.496138116528  
AAAGTGAA -0.210962163986  
AAAGTGAC 1.68358038393  
AAAGTGAG 0.0223004428084  
AAAGTGAT 3.8888560637  
AAAGTGCA -0.117598290168  
AAAGTGCC -1.08950284951  
AAAGTGCG -0.0791028486867  
AAAGTGCT -0.446186640173  
AAAGTGGA 0.0131048045667  
AAAGTGGC -1.03324066552  
AAAGTGGG 0.17184010675  
AAAGTGGT -0.378057477954  
AAAGTGTA 0.00788869681095  
AAAGTGTC -0.25505967522  
AAAGTGTG -0.190410624485  
AAAGTGTT 1.26626803118  
AAAGTTAA 0.161273616434  
AAAGTTAC -0.565543826192  
AAAGTTAG 0.408094647639  
AAAGTTAT 0.0899008329292  
AAAGTTCA 0.170138043492

AAAGTTCC 0.26129939416  
AAAGTTTCG 1.21381800257  
AAAGTTCT 1.21488782927  
AAAGTTGA 0.372666917041  
AAAGTTGC -0.839717155525  
AAAGTTGG -0.0688169823033  
AAAGTTGT 0.160123016675  
AAAGTTTA 0.531895601065  
AAAGTTTC 0.82696875168  
AAAGTTTG -0.0152819300021  
AAATAAAA 1.81687612737  
AAATAAAC 0.445399727365  
AAATAAAG 2.81220633156  
AAATAAAT 3.85157867164  
AAATAACA 1.82493657102  
AAATAACC 0.929250346121  
AAATAACG 1.60121122256  
AAATAACT 0.897611454969  
AAATAAGA 1.44326845399  
AAATAAGC 1.44835840588  
AAATAAGG 1.00036207443  
AAATAAGT 0.941869263256  
AAATAATA 2.64658679138  
AAATAATC 2.35508097882  
AAATAATG 1.35047706964  
AAATAATT 2.58210698935  
AAATACAA 0.920274960195  
AAATACAC -0.0895115400851  
AAATACAG 2.39024848693  
AAATACAT 1.8641935276  
AAATACCA 0.111935432442  
AAATACCC 0.18338982172  
AAATACCG 1.87868729573  
AAATACCT 0.707148577808  
AAATACGA 1.82561564763  
AAATACGC 2.05821999562  
AAATACGG 3.06665375531  
AAATACGT 3.43610182425  
AAATACTA 1.36020460265  
AAATACTC 2.12534532356  
AAATACTG 3.43430170915  
AAATACTT 1.78770393724  
AAATAGAA 1.87947420853  
AAATAGAC 0.11917565481  
AAATAGAG 1.27981417309  
AAATAGAT 3.69625707216  
AAATAGCA 1.02331536342  
AAATAGCC 0.55407405157  
AAATAGCG 0.795541369367  
AAATAGCT 0.0733481844669  
AAATAGGA 0.051428291027  
AAATAGGC 0.666133558096  
AAATAGGG -0.0977583030414  
AAATAGGT 0.131118826184

AAATAGTA 0.935966584484  
AAATAGTC 0.141521064064  
AAATAGTG -0.338606083135  
AAATAGTT 1.76690695589  
AAATATAA 3.31961083281  
AAATATAC 2.58895500438  
AAATATAG 2.57406007726  
AAATATAT 4.52634703647  
AAATATCA 4.08392758523  
AAATATCC 9.17332801458  
AAATATCG 7.40464301047  
AAATATCT 8.97938960585  
AAATATGA 1.1434967261  
AAATATGC 4.35930897145  
AAATATGG 3.81314464267  
AAATATGT 2.76712892652  
AAATATTA 3.4397449391  
AAATATTC 4.11444814421  
AAATATTG 2.15824556517  
AAATATTT 5.29477197337  
AAATCAA 3.90120913753  
AAATCAAC 3.47506233536  
AAATCAAG 4.79635763869  
AAATCAAT 4.292018142  
AAATCACA 4.36552912166  
AAATCACC 3.59595525042  
AAATCACG 5.2730690014  
AAATCACT 2.47146413406  
AAATCAGA 2.93005443532  
AAATCAGC 3.88377360621  
AAATCAGG 4.71385212073  
AAATCAGT 2.44143320971  
AAATCATA 4.87436859381  
AAATCATC 3.52704229806  
AAATCATG 3.84038473286  
AAATCATT 3.51204682098  
AAATCCAA 5.25602047296  
AAATCCAC 6.90526231355  
AAATCCAG 6.41216213845  
AAATCCAT 9.61030194592  
AAATCCCA 6.96353216609  
AAATCCCC 5.79710754871  
AAATCCCG 6.67097505468  
AAATCCCT 3.55318716384  
AAATCCGA 5.79237274847  
AAATCCGC 9.64386252811  
AAATCCGG 5.78039501955  
AAATCCGT 8.10290322075  
AAATCCTA 6.42816540519  
AAATCCTC 9.56798040113  
AAATCCTG 7.80305280159  
AAATCCTT 6.16629206431  
AAATCGAA 4.68562901406  
AAATCGAC 4.40495324516



AAATCGAG 2.15270053618  
AAATCGAT 5.90937918861  
AAATCGCA 5.03876425558  
AAATCGCC 4.11772986207  
AAATCGCG 8.67535938897  
AAATCGCT 2.67244499606  
AAATCGGA 1.28759794819  
AAATCGGC 3.01944273403  
AAATCGGG 3.92254259357  
AAATCGGT 3.78671727936  
AAATCGTA 5.62130456571  
AAATCGTC 4.17778921263  
AAATCGTG 4.37685712707  
AAATCGTT 3.67632049045  
AAATCTAA 9.42280872781  
AAATCTAC 8.49640126034  
AAATCTAG 8.53884250747  
AAATCTAT 5.30007343411  
AAATCTCA 7.65803913536  
AAATCTCC 7.73898935554  
AAATCTCG 12.6613908573  
AAATCTCT 5.57085429489  
AAATCTGA 15.3725886029  
AAATCTGC 10.4626836096  
AAATCTGG 14.7916804082  
AAATCTGT 9.18687790369  
AAATCTTA 13.341232728  
AAATCTTC 9.12425817202  
AAATCTTG 7.87884041576  
AAATGAAA 2.40988841501  
AAATGAAC -0.576478167019  
AAATGAAG 0.773762204249  
AAATGAAT 2.35175554359  
AAATGACA 0.134051637728  
AAATGACC 0.982931539373  
AAATGACG 0.706654779613  
AAATGACT 0.738053433363  
AAATGAGA 0.716012380332  
AAATGAGC -0.90956628431  
AAATGAGG -1.02424238001  
AAATGAGT 0.839001855946  
AAATGATA 1.01593233095  
AAATGATC 0.136509387096  
AAATGATG 1.31470438811  
AAATGATT 2.53222504444  
AAATGCAA 1.05743906707  
AAATGCAC -0.116835317829  
AAATGCAG 1.38947567733  
AAATGCAT 0.736982149418  
AAATGCCA -0.476159691037  
AAATGCCC 0.533707790481  
AAATGCCG 1.83653666507  
AAATGCCT -0.926753459291  
AAATGCGA -0.359862305138

AAATGCGC 1.76411945258  
AAATGCGG -0.184073478245  
AAATGCGT 1.14725642063  
AAATGCTA 0.924619010344  
AAATGCTC 0.0706118929462  
AAATGCTG -0.160767535737  
AAATGCTT 0.997207969676  
AAATGGAA -0.26226429915  
AAATGGAC 0.0910391501869  
AAATGGAG 0.208941172045  
AAATGGAT 2.71910434566  
AAATGGCA -0.584948096782  
AAATGGCC -0.574741129857  
AAATGGCG 0.681317644442  
AAATGGCT -1.02141324111  
AAATGGGA -0.223854418824  
AAATGGGC -0.735961244548  
AAATGGGG 0.41917471306  
AAATGGGT -0.384941091422  
AAATGGTA 0.969415375095  
AAATGGTC -0.576212948257  
AAATGGTG 0.267240377682  
AAATGGTT 0.209268636025  
AAATGTAA 1.420492949  
AAATGTAC -0.635882381435  
AAATGTAG 0.46665886386  
AAATGTAT 0.837764862321  
AAATGTCA 0.474930608175  
AAATGTCC -0.387815613129  
AAATGTCC 2.5175006151  
AAATGTCT 0.0729434864513  
AAATGTGA 0.730835069684  
AAATGTGC 0.352361443926  
AAATGTGG 1.01094730076  
AAATGTGT 0.584418908327  
AAATGTTA 1.36694249153  
AAATGTTC 0.48209859278  
AAATGTTG 0.980380526265  
AAATTAAC 0.628431691118  
AAATTAAG 1.38751755514  
AAATTAAT 2.06363012526  
AAATTACA 2.54353348112  
AAATTACC 4.17718466374  
AAATTACG 3.9249505884  
AAATTACT 2.01822817073  
AAATTAGA 1.52979742799  
AAATTAGC 1.16386944071  
AAATTAGG 1.86436798076  
AAATTAGT 1.11539665263  
AAATTATA 2.47258579707  
AAATTATC 1.89562132627  
AAATTATG 0.683679423756  
AAATTATT 2.48995242148

AAATTCAA 1.02288901489  
AAATTCAC -0.183556155936  
AAATTCAG 1.84884622971  
AAATTCAT 2.02409254476  
AAATTCCA 0.542750834255  
AAATTCCC 3.38815260381  
AAATTCCG 2.58124429975  
AAATTCCT 1.40136493061  
AAATTCGA 2.82132098857  
AAATTCGC 4.25666244099  
AAATTCGG 4.23460785639  
AAATTCGT 1.57702531168  
AAATTCTA 2.99520457048  
AAATTCTC 3.18872891319  
AAATTCTG 2.30990677102  
AAATTCTT 4.02740143155  
AAATTGAA 0.832363476152  
AAATTGAC 0.583009335147  
AAATTGAG 0.421121177281  
AAATTGAT 2.48484997891  
AAATTGCA 1.49646958879  
AAATTGCC 0.711584226274  
AAATTGCG 2.94995229593  
AAATTGCT 1.37094950151  
AAATTGGA 1.1059512008  
AAATTGGC 0.676625520691  
AAATTGGG 0.12073865517  
AAATTGGT 0.370893656909  
AAATTGTA 1.45113216944  
AAATTGTC 1.180535338  
AAATTGTG 0.252702892178  
AAATTGTT 1.85586182802  
AAATTTAA 1.23234209661  
AAATTTAC 0.512736564149  
AAATTTAG 1.21240155952  
AAATTTAT 2.6225247464  
AAATTTCA 1.67869028291  
AAATTTCC 5.53966590091  
AAATTTCG 5.24974723737  
AAATTTCT 1.59156633621  
AAATTTGA 0.998553424035  
AAATTTGC 2.42329632673  
AAATTTGG 1.62540150517  
AAATTTGT 2.184857166  
AAATTTTA 3.28926889055  
AAATTTTC 3.17730014963  
AAATTTTG 1.59322072671  
AACAAAAA 0.784240635275  
AACAAAAC 2.4933840275  
AACAAAAG 0.201637871746  
AACAAAAT 5.52935463681  
AACAAACA 1.45009814935  
AACAAACC 1.32573886256  
AACAAACG 0.557908481996

AACAAACT 0.0603878554263  
AACAAAGA 1.53474644338  
AACAAAGC 0.00742945616164  
AACAAAGG 0.291664860538  
AACAAAGT 0.240434338603  
AACAAATA 2.38205751568  
AACAAATC 4.86572858262  
AACAAATG 0.500013974374  
AACAAATT 2.62763239343  
ACAACAA 0.962698928554  
ACAACAC -0.91271310283  
ACAACAG -0.978278761262  
ACAACAT 1.4247816238  
ACAACCA -0.370721285532  
ACAACCC -0.822464196299  
ACAACCG -0.15918455029  
ACAACCT -1.03319320094  
ACAACGA 0.597141498102  
ACAACGC -0.068331719405  
ACAACGG 0.767942380318  
ACAACGT 1.14806290217  
ACAACCTA 2.17510111261  
ACAACCTC 1.65913945501  
ACAACCTG 0.462576493446  
ACAACCTT 1.41270646758  
ACAAGAA 1.22032065032  
ACAAGAC 0.595138825823  
ACAAGAG 0.368233142178  
ACAAGAT 1.77362694145  
ACAAGCA 1.14272646753  
ACAAGCC 0.466228351773  
ACAAGCG -0.00474062922307  
ACAAGCT 0.433129300189  
ACAAGGA 0.0935984904147  
ACAAGGC -0.696000230006  
ACAAGGG 0.0173853604285  
ACAAGGT -1.09005035763  
ACAAGTA 0.286497882788  
ACAAGTC -0.130818841698  
ACAAGTG -0.629397845177  
ACAAGTT -0.100956333347  
ACAATAA 3.17509783466  
ACAATAC 0.750228723197  
ACAATAG 0.808436746874  
ACAATAT 1.94033400347  
ACAATCA 1.74584558848  
ACAATCC 2.18259760208  
ACAATCG 1.29871090574  
ACAATCT 2.59540831394  
ACAATGA 1.01712394177  
ACAATGC 0.24271805117  
ACAATGG 2.48465554067  
ACAATGT 1.02488023738  
ACAATTA 1.40564756825

AACAATTC 0.987079277676  
AACAATTG 0.419656436933  
AACACAAA 0.681656558212  
AACACAAC -0.423702584376  
AACACAAG 0.492272251226  
AACACAAT 2.54811568689  
AACACACA 0.931620452555  
AACACACC -0.543147413329  
AACACACG 1.29131829708  
AACACACT -0.885686186902  
AACACAGA -0.268618307808  
AACACAGC 0.189383682452  
AACACAGG 0.0488660363073  
AACACAGT -0.192757414983  
AACACATA 1.21824428303  
AACACATC 0.258378865117  
AACACATG -0.445819414196  
AACACATT 0.331666677966  
AACACCAA 0.245445391037  
AACACCAC -0.647850534168  
AACACCAG -0.66932867391  
AACACCAT 0.273927887482  
AACACCCA 0.329845536896  
AACACCCC -0.668248854668  
AACACCCG -0.83842208024  
AACACCCCT -1.10873183423  
AACACCGA -0.399635959488  
AACACCGC 0.448800106679  
AACACCGG 0.424821332903  
AACACCGT -0.557919099074  
AACACCTA 0.885712000973  
AACACCTC 0.784861422046  
AACACCTG -0.383832127261  
AACACCTT 0.977472487901  
AACACGAA 1.85927615526  
AACACGAC -0.320806032148  
AACACGAG -0.360357144224  
AACACGAT 1.78587030549  
AACACGCA 0.329667336535  
AACACGCC -0.605426149452  
AACACGCG 0.247009432287  
AACACGCT -0.441242621052  
AACACGGA -1.1137974293  
AACACGGC 0.280805463788  
AACACGGG -0.832009157211  
AACACGGT -0.224148574326  
AACACGTA 1.03414728067  
AACACGTC -0.0322043025773  
AACACGTG 0.377669434178  
AACACGTT 0.109677742124  
AACACTAA 2.65384554159  
AACACTAC -0.415792861588  
AACACTAG 0.309766977791  
AACACTAT 0.176465821722

AACACTCA -0.308669671598  
AACACTCC -0.17667337518  
AACACTCG 0.227417385149  
AACACTCT -0.339747731241  
AACACTGA 1.26056520328  
AACACTGC 0.267340719474  
AACACTGG 0.30217784911  
AACACTGT 0.539437056986  
AACACTTA 2.0556369231  
AACACTTC 0.50636610943  
AACACTTG 0.0415061115948  
AACAGAAA 1.83710207649  
AACAGAAC 0.11871849594  
AACAGAAG 0.241248106372  
AACAGAAT 4.81361184698  
AACAGACA 1.59321073416  
AACAGACC 1.3137009702  
AACAGACG 0.695124633374  
AACAGACT -0.565429120118  
AACAGAGA -0.0215052028808  
AACAGAGC -0.562022287287  
AACAGAGG -0.942228578469  
AACAGAGT -0.24084195111  
AACAGATA 3.04126915556  
AACAGATC 3.87620196448  
AACAGATG 0.125210526606  
AACAGATT 6.19566348078  
AACAGCAA 0.415499538798  
AACAGCAC -0.90966787517  
AACAGCAG -0.642920879328  
AACAGCAT 0.236449187311  
AACAGCCA -0.424880039096  
AACAGCCC -0.606167263102  
AACAGCCG -0.376707027323  
AACAGCCT -1.06550034344  
AACAGCGA -0.2460482745  
AACAGCGC 0.866097054256  
AACAGCGG -0.320000799677  
AACAGCGT -0.0521744009486  
AACAGCTA 0.752558859456  
AACAGCTC 0.0939723780875  
AACAGCTG -0.70160937781  
AACAGCTT 0.480024723628  
AACAGGAA 2.93647464458  
AACAGGAC 0.119496248917  
AACAGGAG 0.144942469355  
AACAGGAT 2.78843719302  
AACAGGCA -0.245372736918  
AACAGGCC -0.620525299178  
AACAGGCG -1.53399700261  
AACAGGCT -0.912631913414  
AACAGGGA -0.414773413964  
AACAGGGC -0.348253259441  
AACAGGGG -0.647075695683

AACAGGGT 0.0924505969694  
AACAGGTA -0.131798943682  
AACAGGTC -0.723713300594  
AACAGGTG -1.5407186536  
AACAGGTT -0.12505772396  
AACAGTAA 0.792850044293  
AACAGTAC -0.0626186907835  
AACAGTAG -0.531583334078  
AACAGTAT 1.96807059817  
AACAGTCA 0.674502105177  
AACAGTCC 0.26624341328  
AACAGTCG 0.945857953574  
AACAGTCT -0.0634060199475  
AACAGTGA -0.787598129922  
AACAGTGC 0.577786565695  
AACAGTGG 0.362799280243  
AACAGTGT -0.224759784909  
AACAGTTA 1.06863800213  
AACAGTTC -0.106468053851  
AACAGTTG 0.876553418414  
AACATAAA 1.75549796924  
AACATAAC 0.666656709388  
AACATAAG 0.463743539267  
AACATAAT 2.27203711258  
AACATACA 1.00141524688  
AACATACC 0.0597874700988  
AACATACG 0.376807785471  
AACATACT 0.365398174289  
AACATAGA 0.711966232888  
AACATAGC -0.134730714337  
AACATAGG 0.546271540448  
AACATAGT -0.118897945369  
AACATATA 0.964652679005  
AACATATC 2.97529380284  
AACATATG -0.422908385338  
AACATATT 1.91708926529  
AACATCAA -0.0705321607755  
AACATCAC 0.315696095168  
AACATCAG 1.1955628745  
AACATCAT 0.474084156462  
AACATCCA 0.866406406751  
AACATCCC 0.233122711184  
AACATCCG 1.39185286182  
AACATCCT -0.122558963528  
AACATCGA 1.38028607625  
AACATCGC 0.69904504131  
AACATCGG 1.33316831872  
AACATCGT 1.07245765192  
AACATCTA 1.6352830899  
AACATCTC 1.25472747604  
AACATCTG 1.08894701427  
AACATCTT 1.81173433916  
AACATGAA 1.20874387221  
AACATGAC -0.402969721844

AACATGAG 1.70215235891  
AACATGAT 1.73941705211  
AACATGCA 0.14683459912  
AACATGCC 0.215547700606  
AACATGCG 0.0877337000374  
AACATGCT -0.952480303662  
AACATGGA 0.33363042096  
AACATGGC 0.810872845731  
AACATGGG -0.776941706714  
AACATGGT -0.0949408221041  
AACATGTA -0.523590964627  
AACATGTC -1.03779851446  
AACATGTG -0.451896546125  
AACATGTT 1.33120749021  
AACATTAA 1.61292893717  
AACATTAC 0.999331801545  
AACATTAG 0.354217142542  
AACATTAT 1.19053662507  
AACATTCA -0.338550291434  
AACATTCC 1.23688578946  
AACATTCCG 0.315696095168  
AACATTCT 0.517808196378  
AACATTGA -0.300743502748  
AACATTGC 0.741977380325  
AACATTGG 0.114314698708  
AACATTGT -0.370424631894  
AACATTTA 1.59950520392  
AACATTTG 0.244697823869  
AACCAAAA 0.955096060126  
AACCAAAC -0.238327993685  
AACCAAAG -0.035530778704  
AACCAAAT 1.455033425  
AACCAACA 0.141127815838  
AACCAACC -0.632268203324  
AACCAACG 0.226451022912  
AACCAACT 0.472619832469  
AACCAAGA 0.323978248383  
AACCAAGC 0.680985184189  
AACCAAGG -0.268853548938  
AACCAAGT 0.0906361175953  
AACCAATA 0.325158825773  
AACCAATC 1.45332053648  
AACCAATG -0.192673935609  
AACCAATT 0.823555048975  
AACCACAA 0.263516281591  
AACCACAC -0.0817186051502  
AACCACAG -0.315598251512  
AACCACAT 0.708921005228  
AACCACCA 0.118424548616  
AACCACCC -0.641652242648  
AACCACCG -0.0481161791818  
AACCACCT -1.07780366274  
AACCACGA -0.106468053851



AACCACGC -0.369986833578  
AACCACGG -0.4835579205  
AACCACGT 0.267848465595  
AACCACTA -0.0253000794883  
AACCACTC 1.202226652  
AACCACTG -0.106156619576  
AACCACTT 0.946464792419  
AACCAGAA 0.736424440579  
AACCAGAC -1.16588064829  
AACCAGAG -0.443445144203  
AACCAGAT 2.75679247289  
AACCAGCA 0.427911527009  
AACCAGCC -0.668655426285  
AACCAGCG -0.583065335026  
AACCAGCT -0.832777750356  
AACCAGGA -0.47657708791  
AACCAGGC -0.834715054745  
AACCAGGG -0.751449687118  
AACCAGGT -0.844595598579  
AACCAGTA 0.638396963395  
AACCAGTC -0.942092430063  
AACCAGTG -0.878894379929  
AACCAGTT -0.0842234027443  
AACCATAA 0.993230937326  
AACCATAC -0.468718160552  
AACCATAG 0.658638109511  
AACCATAT 1.14056849447  
AACCATCA -0.071157111106  
AACCATCC 0.0300338388377  
AACCATCG -0.711134353634  
AACCATCT 0.544257626558  
AACCATGA 0.972446863007  
AACCATGC 0.571631783376  
AACCATGG -0.45250650764  
AACCATGT 0.35997826028  
AACCATTA 0.193839107827  
AACCATTC 0.287689909968  
AACCATTG -0.306134480017  
AACCCAAA -0.283746186096  
AACCCAAC 0.233293833493  
AACCCAAG 0.247986619779  
AACCCAAT 0.353250155771  
AACCCACA 0.0605306655285  
AACCCACC -0.01351491521  
AACCCACG -0.803427568042  
AACCCACT -1.08984655137  
AACCCAGA 0.918791067471  
AACCCAGC -0.79075244285  
AACCCAGG -0.49123219398  
AACCCAGT -0.261215082073  
AACCCATA 0.51325367828  
AACCCATC -0.323999066182  
AACCCATG -0.90092814673  
AACCCATT -0.566702128536

AACCCCAA -1.02431003786  
AACCCAC -0.689624987194  
AACCCAG -1.0660057996  
AACCCAT -0.500262955252  
AACCCCA -1.45439077954  
AACCCCC -1.43036766385  
AACCCCG -0.887296651845  
AACCCCT -1.50533797123  
AACCCGA -0.770770686511  
AACCCGC -0.936156442812  
AACCCGG -0.159587999237  
AACCCGT -0.286614878819  
AACCCCTA -0.493582523504  
AACCCCTC 0.0591600216323  
AACCCCTG -0.813765270745  
AACCCCTT -0.338606083135  
AACCCGAA 0.125509262024  
AACCCGAC -0.992163192407  
AACCCGAG -1.24329996155  
AACCCGAT 0.425300974995  
AACCCGCA 1.01841339625  
AACCCGCC -0.256257531383  
AACCCGCG -0.0390841688414  
AACCCGCT -0.484719970049  
AACCCGGA -0.593996553184  
AACCCGGC -0.371797149393  
AACCCGGG -0.621382576147  
AACCCGGT -0.852202838745  
AACCCGTA 0.326192429501  
AACCCGTC -0.223761571439  
AACCCGTG 0.541339387473  
AACCCGTT -0.516799782187  
AACCCCTAA -0.171512850948  
AACCCCTAC -0.392092629965  
AACCCCTAG 0.107981091493  
AACCCCTAT -0.603068950054  
AACCCCTCA -0.267512674495  
AACCCCTCC -1.53540595126  
AACCCCTCG -0.810079479405  
AACCCCTCT -0.728564472331  
AACCCCTGA 0.350524689506  
AACCCCTGC -0.430016622859  
AACCCCTGG -1.09117347789  
AACCCCTGT -0.515863397581  
AACCCCTTA -0.170734473437  
AACCCCTTC -0.721054034931  
AACCCCTTG -0.374556756848  
AACCGAAA 0.508070879003  
AACCGAAC -0.303792477612  
AACCGAAG 0.553343763176  
AACCGAAT 2.98478463747  
AACCGACA 1.52850526719  
AACCGACC -0.455833191945  
AACCGACG 0.994965059995

AACCGACT -0.188867401033  
AACCGAGA 0.366527123537  
AACCGAGC -1.04933865325  
AACCGAGG -0.669610338732  
AACCGAGT -0.207779330674  
AACCGATA 2.62539281459  
AACCGATC 1.18010232778  
AACCGATG -0.164942753535  
AACCGATT 1.57466707139  
AACCGCAA -0.928456355262  
AACCGCAC 0.300742878214  
AACCGCAG -0.6908536537  
AACCGCAT 0.217070730792  
AACCGCCA -0.129893906882  
AACCGCCC -0.871663317393  
AACCGCCG -0.433816912095  
AACCGCCT -1.33617378438  
AACCGCGA 0.472619832469  
AACCGCGC 0.83011661109  
AACCGCGG -0.633326996589  
AACCGCGT 0.832633483008  
AACCGCTA -0.0563292173035  
AACCGCTC -0.880856041143  
AACCGCTG -1.11941011613  
AACCGCTT -0.291056564447  
AACCGGAA 0.747059629632  
AACCGGAC -0.326384369609  
AACCGGAG 0.264130406666  
AACCGGAT 1.40043291774  
AACCGGCA -0.380515227322  
AACCGGCC -0.65186774487  
AACCGGCG -0.343820941823  
AACCGGCT -0.807394816027  
AACCGGGA -1.15609149459  
AACCGGGC -0.649188077763  
AACCGGGG -1.31205553135  
AACCGGGT -0.876439753231  
AACCGGTA -0.655919304941  
AACCGGTC -0.16742048799  
AACCGGTG -1.40231672038  
AACCGGTT -0.585672139836  
AACCGTAA 2.15170357178  
AACCGTAC -0.192733266336  
AACCGTAG -0.418297034648  
AACCGTAT 0.375116755646  
AACCGTCA -0.382702345301  
AACCGTCC -0.116093996001  
AACCGTCG -0.817965053546  
AACCGTCT 0.349578312357  
AACCGTGA 0.0255009712502  
AACCGTGC 0.474808615872  
AACCGTGG -0.309540896492  
AACCGTGT 0.212180421593  
AACCGTTA 0.520988323377

AACCGTTC -0.292708248631  
AACCGTTG -0.570283622703  
AACCTAAA 1.09744858709  
AACCTAAC 0.571056379407  
AACCTAAG 0.497795213341  
AACCTAAT 1.20588642109  
AACCTACA 0.700727535838  
AACCTACC -0.138239346206  
AACCTACG -0.278128711173  
AACCTACT -0.237100576246  
AACCTAGA -0.0703579157966  
AACCTAGC -0.975408819471  
AACCTAGG -0.197463070304  
AACCTAGT -0.112588070446  
AACCTATA -0.171072970852  
AACCTATC 0.011278667225  
AACCTATG 0.323201328118  
AACCTATT 0.0750927160359  
AACCTCAA 0.51401956511  
AACCTCAC -0.766304435881  
AACCTCAG -0.480143801439  
AACCTCAT -0.359589175613  
AACCTCCA -1.10223522365  
AACCTCCC -0.16835957891  
AACCTCCG -1.43067576728  
AACCTCCT -0.994222280921  
AACCTCGA 1.06117357206  
AACCTCGC -0.438533184493  
AACCTCGG -0.716095651528  
AACCTCGT 0.463581993145  
AACCTCTA -0.0666150836869  
AACCTCTC -0.687118524176  
AACCTCTG -1.0786326275  
AACCTCTT 0.926989741311  
AACCTGAA 1.66531609602  
AACCTGAC -0.546380209359  
AACCTGAG 0.853583475185  
AACCTGAT 0.484435182556  
AACCTGCA 1.03211692072  
AACCTGCC -0.836696909224  
AACCTGCG -0.548743445919  
AACCTGCT 0.00745069031677  
AACCTGGA -0.689702429407  
AACCTGGC 0.546271540448  
AACCTGGG -0.942050378108  
AACCTGGT -0.606961253962  
AACCTGTA 0.212964628087  
AACCTGTC -0.366370781865  
AACCTGTG -0.984870925542  
AACCTTAA 0.837228179459  
AACCTTAC -1.29818671355  
AACCTTAG -0.16742048799  
AACCTTAT -0.0873454480832  
AACCTTCA 0.483478604685

AACCTTCC 0.405371263154  
AACCTTCG -0.702583234454  
AACCTTCT -0.147902552217  
AACCTTGA 0.186111957138  
AACCTTGC -0.663383526828  
AACCTTGG -0.401588669048  
AACCTTGT -0.204737225684  
AACCTTTA 0.671614051901  
AACCTTTC 0.525304477675  
AACCTTTG -0.336032586804  
AACGAAAA 1.48237198338  
AACGAAAC 1.98842374404  
AACGAAAG 0.401813917635  
AACGAAAT 3.31366610209  
AACGAACA 0.279499771425  
AACGAACC -0.917961894531  
AACGAACG 0.399767111622  
AACGAACT -0.25297831166  
AACGAAGA -0.190635456716  
AACGAAGC 0.608087496896  
AACGAAGG -1.15473001052  
AACGAAGT -0.564414252409  
AACGAATA 0.531935154883  
AACGAATC 4.9224997618  
AACGAATG 0.427718337833  
AACGAATT 1.08361765769  
AACGACAA 0.231579279555  
AACGACAC -1.14994545575  
AACGACAG 0.112197528534  
AACGACAT -0.55266239661  
AACGACCA 0.455581712931  
AACGACCC -0.994499782184  
AACGACCG -0.0904333522315  
AACGACCT -0.708918090736  
AACGACGA 0.11115205866  
AACGACGC -0.483992804324  
AACGACGG -0.0167949676445  
AACGACGT -0.18299594896  
AACGACTA 0.377976704893  
AACGACTC 1.40199841623  
AACGACTG -0.249154498312  
AACGACTT 2.169550671  
AACGAGAA 1.13442849279  
AACGAGAC 0.963639684898  
AACGAGAG -0.202955430254  
AACGAGAT 2.68000352258  
AACGAGCA 0.816756788484  
AACGAGCC -0.633926757382  
AACGAGCG 0.308677166005  
AACGAGCT 0.131950289082  
AACGAGGA 0.160319953055  
AACGAGGC 0.174987133448  
AACGAGGG -1.39254338821  
AACGAGGT 0.225898518522

AACGAGTA 0.546700178932  
AACGAGTC -0.52238311592  
AACGAGTG -0.812916737252  
AACGAGTT 0.258729020498  
AACGATAA 1.76828384512  
AACGATAC 0.351765846692  
AACGATAG 1.35288298269  
AACGATAT 3.26981965351  
AACGATCA 0.602028268275  
AACGATCC 1.38710994264  
AACGATCG 1.54547385528  
AACGATCT 2.15983500413  
AACGATGA 0.127313748855  
AACGATGC 0.671572208124  
AACGATGG -0.511001192411  
AACGATGT -0.520597365109  
AACGATTA 1.50148397207  
AACGATTC 2.86632303317  
AACGATTG 1.58376403326  
AACGCAAA 0.156143278011  
AACGCAAC 1.94500031315  
AACGCAAG 0.378244838146  
AACGCAAT 3.74766870895  
AACGCACA 0.803730675198  
AACGCACC -1.29415909395  
AACGCACG -0.00466943234996  
AACGCACT 0.427125655091  
AACGCAGA 1.72336215722  
AACGCAGC -0.493084769926  
AACGCAGG -0.916528589059  
AACGCAGT -0.0883653120637  
AACGCATA 0.931067323631  
AACGCATC 0.493441587004  
AACGCATG -0.655746933564  
AACGCATT 0.305093590059  
AACGCCAA -0.463690870235  
AACGCCAC -1.20996879151  
AACGCCAG -1.16594830613  
AACGCCAT -0.533083048329  
AACGCCCA -0.0466172976428  
AACGCCCC -1.37219482225  
AACGCCCG 0.0299740917541  
AACGCCCT -1.28362861843  
AACGCCGA -0.398863202783  
AACGCCGC -0.428145519071  
AACGCCGG -0.595360327206  
AACGCCGT -0.926037327  
AACGCCTA -0.122567290648  
AACGCCTC -0.166794288592  
AACGCCTG -0.63849688883  
AACGCCTT 0.428350782571  
AACGCGAA 1.21278169253  
AACGCGAC -0.0230249022189  
AACGCGAG -0.0251932841787

AACGCGAT 3.23022086868  
AACGCGCA 0.829783734481  
AACGCGCC -0.527607134439  
AACGCGCG 0.268091617489  
AACGCGCT -0.0203831235064  
AACGCGGA -0.0870997980532  
AACGCGGC -0.117444030276  
AACGCGGG -0.187201144389  
AACGCGGT -0.0505110587963  
AACGCGTA -0.295915855125  
AACGCGTC 0.341662136051  
AACGCGTG 0.215810213053  
AACGCGTT 0.414876253891  
AACGCTAA 0.759426026863  
AACGCTAC -0.118017144287  
AACGCTAG -0.201888518048  
AACGCTAT 0.369296099002  
AACGCTCA -0.392043291781  
AACGCTCC 0.342052261607  
AACGCTCG 0.263121367941  
AACGCTCT -1.23567356901  
AACGCTGA 0.800323217832  
AACGCTGC 0.182537957379  
AACGCTGG -0.0972416052665  
AACGCTGT -0.145808281622  
AACGCTTA -0.0120466358357  
AACGCTTC 0.698311838424  
AACGCTTG -0.549013244596  
AACGAAA 1.28577181085  
AACGGAAC -0.163674325033  
AACGGAAG -0.817971715242  
AACGGAAT 1.9346592796  
AACGGACA 0.941066945276  
AACGGACC -0.219555126943  
AACGGACG -0.253806027355  
AACGGACT -0.618167891602  
AACGGAGA 0.0782894972738  
AACGGAGC -1.23653042963  
AACGGAGG -1.11335546742  
AACGGAGT 0.188497468743  
AACGGATA 1.67693180341  
AACGGATC 2.77870445556  
AACGGATG 0.539615257347  
AACGGATT 4.40089065166  
AACGGCAA -0.151423258409  
AACGGCAC -0.487330105707  
AACGGCAG -0.614566828704  
AACGGCAT -0.444451268436  
AACGGCCA -0.802034857279  
AACGGCCC -1.64328128833  
AACGGCCG -0.493204472272  
AACGGCCT -0.871022753713  
AACGGCGA -0.0772419456204  
AACGGCGC -0.563033824148

AACGGCGG -0.916750923154  
AACGGCGT -0.0464411790619  
AACGGCTA 0.750801004496  
AACGGCTC 0.527524904133  
AACGGCTG -1.32852324319  
AACGGCTT -0.755371760478  
AACGGGAA 0.0298414823735  
AACGGGAC -1.29578392318  
AACGGGAG 0.148781479697  
AACGGGAT 1.06314376858  
AACGGGCA 0.00242360817736  
AACGGGCC -1.23476612115  
AACGGGCG -0.398976867966  
AACGGGCT -0.402460934833  
AACGGGGA -1.49749257544  
AACGGGGC 0.230732411486  
AACGGGGG -0.666101290507  
AACGGGGT -0.695484156765  
AACGGGTA -0.0146873736583  
AACGGGTC -1.32105673135  
AACGGGTG -0.604417318905  
AACGGTAA 0.700440458387  
AACGGTAC 0.721576561689  
AACGGTAG -0.393469311023  
AACGGTAT 0.481056453754  
AACGGTCA -0.433104110652  
AACGGTCC -0.846700694429  
AACGGTCG -0.211832347991  
AACGGTCT -0.474796541549  
AACGGTGA 0.0309183871237  
AACGGTGC -0.672439893993  
AACGGTGG -1.11448566574  
AACGGTGT -0.62775573718  
AACGGTTA 0.111644607788  
AACGGTTC -0.895845481067  
AACGGTTG 0.0338199719696  
AACGTAAG 0.282149044545  
AACGTAAT 3.02397227077  
AACGTACA 0.0323916627697  
AACGTACC -0.282359304317  
AACGTACG 0.105848932504  
AACGTACT 0.797920635632  
AACGTAGA 0.765985090842  
AACGTAGC -0.447779409986  
AACGTAGG -0.0868714267965  
AACGTAGT 0.118404563529  
AACGTATA 2.07750956014  
AACGTATC 4.57733503105  
AACGTATG -0.24945427462  
AACGTATT 2.43720469835  
AACGTCAA 0.879985232604  
AACGTCAC 0.283392908044



AACGTCAG 0.439466654607  
AACGTCAT 0.157145238685  
AACGTCCA -0.425102581369  
AACGTCCC -0.595077205138  
AACGTCCG -0.771215771057  
AACGTCCT -1.00037810413  
AACGTCGA 0.287689909968  
AACGTCGC 0.159348802725  
AACGTCGG -0.287369732217  
AACGTCGT 1.46369779301  
AACGTCTA -0.609288059373  
AACGTCTC -0.0339925515246  
AACGTCTG 0.0130806559196  
AACGTCTT -0.0033687362589  
AACGTGAA 0.31495581423  
AACGTGAC -0.643650543189  
AACGTGAG 0.456497071559  
AACGTGAT 0.542864499439  
AACGTGCA 0.238302387792  
AACGTGCC -0.938948109679  
AACGTGCG -0.194751760142  
AACGTGCT 0.14830433574  
AACGTGGA -0.309349997274  
AACGTGGC -0.431863369822  
AACGTGGG 0.0383932260875  
AACGTGGT -1.26361168001  
AACGTGTA -0.749576917906  
AACGTGTC -0.448713712812  
AACGTGTG -0.80486545343  
AACGTTAA 1.19330913956  
AACGTTAC 0.643306633147  
AACGTTAG 0.373711554203  
AACGTTAT 0.633304513366  
AACGTTCA 0.108981178565  
AACGTTCC -0.204730563988  
AACGTTCG -0.0394064283722  
AACGTTCT 0.109897994439  
AACGTTGA 0.561178333709  
AACGTTGC 0.294785864987  
AACGTTGG 0.0360905693232  
AACGTTGT 0.568492042908  
AACGTTTA -0.171485371453  
AACGTTTC 0.80539193557  
AACGTTTG 0.824180415662  
AACTAAAA 2.84016817485  
AACTAAAC 1.30975266641  
AACTAAAG 0.749400799325  
AACTAAAT 1.2132425986  
AACTAACA 0.519561471423  
AACTAACC -0.638899921422  
AACTAACG 0.921260058451  
AACTAACT 0.745043633962  
AACTAAGA 0.492938420798  
AACTAAGC -0.37102002095

AACTAAGG -0.260493120798  
AACTAAGT -0.241887004628  
AACTAATA 0.519565634983  
AACTAATC 0.485214184601  
AACTAATG 0.416651179447  
AACTAATT 1.74495666846  
AACTACAA 1.1584788798  
AACTACAC -0.735032146172  
AACTACAG -0.655259380708  
AACTACAT 0.603719922634  
AACTACCA 0.927518721588  
AACTACCC 0.664864713237  
AACTACCG 0.787440955539  
AACTACCT 0.296790619045  
AACTACGA 0.110064953189  
AACTACGC 1.10381009015  
AACTACGG 0.444243714978  
AACTACGT -0.0117845397444  
AACTACTA 1.05090956437  
AACTACTC 1.32557835732  
AACTACTG 0.65134230362  
AACTACTT 2.00922468078  
AACTAGAA 3.16239377272  
AACTAGAC -0.818086213138  
AACTAGAG -0.669460034222  
AACTAGAT 0.533605783265  
AACTAGCA 0.570444960646  
AACTAGCC 0.698109489416  
AACTAGCG -0.0173045873677  
AACTAGCT 0.0941782661211  
AACTAGGA 0.531702411889  
AACTAGGC 0.425771873612  
AACTAGGG -0.353058632019  
AACTAGGT 0.0907118943842  
AACTAGTA -0.40404496117  
AACTAGTC -0.537684822831  
AACTAGTG -0.696006267168  
AACTAGTT 1.6639173481  
AACTATAA 1.10260515594  
AACTATAC 0.180559017392  
AACTATAG 1.07440453249  
AACTATAT 1.28339108734  
AACTATCA 1.26359981386  
AACTATCC 1.30978264404  
AACTATCG 0.452618923755  
AACTATCT -0.103689710376  
AACTATGA 1.31226745655  
AACTATGC 1.21713011442  
AACTATGG 0.261315007509  
AACTATGT 0.265417571188  
AACTATTA 0.986309019107  
AACTATTC 1.00465657821  
AACTATTG 0.864964357804  
AACTCAA 1.36288093891

AACTCAAC 0.503899824764  
AACTCAAG -0.789456326675  
AACTCAAT 0.42340572256  
AACTCACA 0.572469283436  
AACTCACC -0.749018584532  
AACTCACG -0.241315556041  
AACTCACT 0.10265173491  
AACTCAGA 0.741851224462  
AACTCAGC -0.311435940749  
AACTCAGG 0.209655222555  
AACTCAGT -0.0566658411158  
AACTCATA 0.657366766517  
AACTCATC -0.908320130853  
AACTCATG -0.221909828205  
AACTCATT 0.457360802046  
AACTCCAA 0.624386584565  
AACTCCAC -0.42361827229  
AACTCCAG -1.27439009552  
AACTCCAT -0.376691830329  
AACTCCCA -0.883744718953  
AACTCCCC -1.13864159898  
AACTCCCG 0.537226623072  
AACTCCCT -1.37389188924  
AACTCCGA -0.177362236154  
AACTCCGC -0.379331943618  
AACTCCGG -0.453212647387  
AACTCCGT 0.0196520024002  
AACTCCTA 0.316179276286  
AACTCCTC 0.489478086223  
AACTCCTG -0.179057221361  
AACTCCTT 0.947102441607  
AACTCGAA 1.2947640592  
AACTCGAC -0.592351114339  
AACTCGAG -0.415442498028  
AACTCGAT 0.33681658512  
AACTCGCA 0.749698702031  
AACTCGCC -0.919975600243  
AACTCGCG 0.472619832469  
AACTCGCT -0.315000780676  
AACTCGGA -0.715024159406  
AACTCGGC -0.0451275759354  
AACTCGGG -0.102545980491  
AACTCGGT -0.455110397958  
AACTCGTA 0.547170453015  
AACTCGTC 0.320281839965  
AACTCGTG 0.399361164539  
AACTCTAA 1.06953858012  
AACTCTAC -0.294933671361  
AACTCTAG 0.0710088883761  
AACTCTAT -0.0285984515861  
AACTCTCA -0.683533699162  
AACTCTCC -0.432179384013  
AACTCTCG 0.0729543117069  
AACTCTCT -1.06594542799

AACTCTGA -0.00642478917452  
AACTCTGC 0.710219203184  
AACTCTGG -0.427719586901  
AACTCTGT 0.390968676988  
AACTCTTA 0.311568966486  
AACTCTTC -0.331538023967  
AACTCTTG 0.468968390498  
AACTGAAA 0.570385629918  
AACTGAAC 0.389627802545  
AACTGAAG -0.562981155116  
AACTGAAT 1.159303681  
AACTGACA 0.235617932591  
AACTGACC -0.708140754116  
AACTGACG 1.20107917491  
AACTGACT -0.845380429607  
AACTGAGA -0.48214522465  
AACTGAGC -0.296865354944  
AACTGAGG -0.24266933752  
AACTGAGT -0.67964077072  
AACTGATA 1.9232261443  
AACTGATC 0.372238070379  
AACTGATG -0.228009027  
AACTGATT 3.11472704982  
AACTGCAA 0.309268391501  
AACTGCAC -0.325084714408  
AACTGCAG -0.680755772043  
AACTGCAT -0.406567453894  
AACTGCCA -1.09250352708  
AACTGCCC -0.803659894681  
AACTGCCG 0.545588716636  
AACTGCCT -0.701003371677  
AACTGCGA 0.0291848889882  
AACTGCGC 0.640252245655  
AACTGCGG 0.833892335322  
AACTGCGT -0.614955288837  
AACTGCTA 0.769330927522  
AACTGCTC -0.134236916141  
AACTGCTG -0.118738064672  
AACTGCTT 0.379428538206  
AACTGGAA 1.5697511563  
AACTGGAC -0.330737787768  
AACTGGAG -0.801976567441  
AACTGGAT 1.43938343631  
AACTGGCA -0.576131342485  
AACTGGCC -0.387009547945  
AACTGGCG -0.726497473053  
AACTGGCT -0.191573298567  
AACTGGGA -1.11012433681  
AACTGGGC -0.328098715369  
AACTGGGG -0.646913108672  
AACTGGGT -0.321108098414  
AACTGGTA -0.481139516773  
AACTGGTC -0.667185065131  
AACTGGTG -0.610326659373

AACTGTAA 1.34791065136  
AACTGTAC -0.505828385678  
AACTGTAG 0.3109662912  
AACTGTAT 0.0317327794265  
AACTGTCA -0.134869360879  
AACTGTCC 0.0837666602309  
AACTGTCCG -0.797795937015  
AACTGTCT -0.330352242127  
AACTGTGA 0.218190520208  
AACTGTGC 0.428120537712  
AACTGTGG -0.23956810998  
AACTGTGT -0.699580475104  
AACTGTTA 0.908387580522  
AACTGTTC 0.172228150527  
AACTGTTG 0.428679287442  
AACTTAAA 1.74043441795  
AACTTAAC 0.462768225376  
AACTTAAG 0.0806283770086  
AACTTAAT 0.485076787126  
AACTTACA 0.238051116956  
AACTTACC -0.169910713125  
AACTTACG 1.5697511563  
AACTTACT 0.430898048475  
AACTTAGA 0.281140838532  
AACTTAGC 1.32667566352  
AACTTAGG 0.88457534914  
AACTTAGT 0.318355777188  
AACTTATA 0.940268582679  
AACTTATC 0.879076952027  
AACTTATG 0.757257020369  
AACTTATT 2.15098910492  
AACTTCAA 0.51604492879  
AACTTCAC -0.348887994137  
AACTTCAG 0.555572933109  
AACTTCAT -0.180512385522  
AACTTCCA -1.07937290844  
AACTTCCC -0.937666774141  
AACTTCCG -0.445054984611  
AACTTCCT -0.43682737403  
AACTTCGA 0.241833294706  
AACTTCGC 0.89488536417  
AACTTCGG -0.463574290559  
AACTTCGT 0.214145205477  
AACTTCTA 0.0717672807992  
AACTTCTC 0.988141609967  
AACTTCTG -0.792513628658  
AACTTCTT 1.37917211582  
AACTTGAA 1.78821688781  
AACTTGAC -0.481847946478  
AACTTGAG -0.0565727855536  
AACTTGAT 0.642079215709  
AACTTGCA 0.635989384923  
AACTTGCC -0.23750444155  
AACTTGCG 0.218048126462

AACTTGCT 0.0977166674431  
AACTTGGA -0.871960595565  
AACTTGGC 0.557816259146  
AACTTGGG -0.876471604463  
AACTTGGT 0.182537957379  
AACTTGTA 1.47443811195  
AACTTGTC -0.201102437952  
AACTTGTG -0.721999579368  
AACTTTAA 0.960845519896  
AACTTTAC 0.478474005769  
AACTTTAG 0.291452935342  
AACTTTAT 0.0655269373252  
AACTTTCA 0.385971156124  
AACTTTCC 0.7227342395  
AACTTTCG 0.0713761143531  
AACTTTCT 0.395892502844  
AACTTTGA -0.0880010005785  
AACTTTGC 0.859634793043  
AACTTTGG 0.564179011279  
AACTTTGT -0.384946087693  
AACTTTTA 0.614177744038  
AACTTTTC 1.13940144865  
AACTTTTG -0.240053789234  
AAGAAAAA 1.19785491418  
AAGAAAAC -0.422650869163  
AAGAAAAG 0.752851141356  
AAGAAAAT 2.11065753355  
AAGAAACA -0.162670907114  
AAGAAACC 0.152215792023  
AAGAAACG 0.0687024844079  
AAGAAACT -0.354393885657  
AAGAAAGA 0.244336218698  
AAGAAAGC 0.0064524768474  
AAGAAAGG -0.358613237189  
AAGAAAGT 1.24612389601  
AAGAAATA 3.66260156081  
AAGAAATC 9.88878185336  
AAGAAATG 0.319312771415  
AAGAAATT 1.32597847542  
AAGAACAA 2.1186186763  
AAGAACAC -0.687429125739  
AAGAACAG 0.145119628826  
AAGAACAT 0.404553123648  
AAGAACCA -0.256930987185  
AAGAACCC -0.247073342931  
AAGAACCG 0.30444157659  
AAGAACCT -0.253861610878  
AAGAACGA -0.117920549699  
AAGAACGC -0.121474772548  
AAGAACGG -0.609882823895  
AAGAACGT -0.662137165192  
AAGAACTA 1.13836576314  
AAGAACTC -0.00501459145992  
AAGAACTG -0.12885655595

AAGAACTT 0.326342317655  
AAGAAGAA -0.983468846769  
AAGAAGAC -0.852012980417  
AAGAAGAG 0.00109501623544  
AAGAAGAT 2.46818199984  
AAGAAGCA -0.752483707201  
AAGAAGCC 0.408535152269  
AAGAAGCG 0.45580363067  
AAGAAGCT 0.296399660777  
AAGAAGGA -0.0605981151978  
AAGAAGGC -0.761716192948  
AAGAAGGG -0.704743289294  
AAGAAGGT 0.0388147865203  
AAGAAGTA 0.102019290172  
AAGAAGTC 0.124255197803  
AAGAAGTG -0.452678879017  
AAGAATAA 1.10240468053  
AAGAATAC 0.253609507331  
AAGAATAG 0.550636200218  
AAGAATAT 3.3562901295  
AAGAATCA 4.30335072733  
AAGAATCC 13.987879577  
AAGAATCG 7.71904153222  
AAGAATCT 8.03813946394  
AAGAATGA 0.312902971055  
AAGAATGC -0.63094086045  
AAGAATGG 1.23057757996  
AAGAATGT 0.0361080562745  
AAGAATTA 1.00559129739  
AAGAATTC 1.2248620532  
AAGAATTG -0.311583538945  
AAGACAAA 2.65286564778  
AAGACAAC -0.628753534293  
AAGACAAG 0.484076700055  
AAGACAAT 0.87109041156  
AAGACACA -0.264650851645  
AAGACACC -0.655292897365  
AAGACACG 0.54021814081  
AAGACACT -0.470075897413  
AAGACAGA 0.428991554429  
AAGACAGC 0.797037336414  
AAGACAGG 0.875105748661  
AAGACAGT 1.93281232445  
AAGACATA 0.53117780335  
AAGACATC 0.412827157921  
AAGACATG -0.0475391097893  
AAGACATT 0.634931840726  
AAGACCAA 0.657733159782  
AAGACCAC -1.17903104383  
AAGACCAG -0.0554956726254  
AAGACCAT -0.60641728487  
AAGACCCA -0.524414100405  
AAGACCCC -0.98132315621  
AAGACCCG -1.29964062865

AAGACCCT -1.45858702331  
AAGACCGA -1.19326063409  
AAGACCGC -1.37938237559  
AAGACCGG -0.978374106782  
AAGACCGT -0.384668794609  
AAGACCTA -0.104472459624  
AAGACCTC -0.800701893599  
AAGACCTG -0.0315129434675  
AAGACCTT -0.382482925698  
AAGACGAA -0.558816762573  
AAGACGAC -0.608316492687  
AAGACGAG -0.348828663409  
AAGACGAT 2.41490217376  
AAGACGCA -0.196237526468  
AAGACGCC -1.21962575218  
AAGACGCG -0.0785642922226  
AAGACGCT -0.0851901813369  
AAGACGGA -1.16221754835  
AAGACGGC -0.895811548054  
AAGACGGG 0.153364726358  
AAGACGGT 0.000473396752734  
AAGACGTA 0.0264154971669  
AAGACGTC 0.0393023393765  
AAGACGTG -0.432237882029  
AAGACTAA 0.865975478309  
AAGACTAC -0.392774412887  
AAGACTAG 0.513801394575  
AAGACTAT 1.2098619962  
AAGACTCA -0.278471372147  
AAGACTCC -1.3461679934  
AAGACTCG -0.239666161814  
AAGACTCT -0.752970427346  
AAGACTGA -0.292560858613  
AAGACTGC -0.927819538786  
AAGACTGG 1.14278683915  
AAGACTGT -0.379170397497  
AAGACTTA 1.31149199353  
AAGACTTC 0.355036739295  
AAGACTTG -0.245724557724  
AAGAGAAA 0.971144917848  
AAGAGAAC -0.881385645953  
AAGAGAAG -0.488619768364  
AAGAGAAT 2.92411386815  
AAGAGACA -0.00960158532524  
AAGAGACC -0.504157549118  
AAGAGACG -1.05642378301  
AAGAGACT -0.291419626864  
AAGAGAGA -0.666551371325  
AAGAGAGC -0.654025926108  
AAGAGAGG -1.13450177144  
AAGAGAGT -0.109942960886  
AAGAGATA 3.65664767025  
AAGAGATC 5.44145626798  
AAGAGATG -0.0373194440072



AAGAGATT 4.76337579131  
AAGAGCAA 0.251012903242  
AAGAGCAC -0.0360905693232  
AAGAGCAG 0.0450713678777  
AAGAGCAT -0.347163655833  
AAGAGCCA -0.633457732368  
AAGAGCCC -1.10581442786  
AAGAGCCG -0.370523100084  
AAGAGCCT -0.375984441514  
AAGAGCGA 0.170624763636  
AAGAGCGC 0.324942112484  
AAGAGCGG -0.74702049217  
AAGAGCGT 1.17577763818  
AAGAGCTA 0.0360239523659  
AAGAGCTC -1.20473207413  
AAGAGCTG -0.660798997063  
AAGAGCTT -0.0821678532559  
AAGAGGAA -0.271302763009  
AAGAGGAC -0.751588750016  
AAGAGGAG -0.704316108056  
AAGAGGAT 3.527347487  
AAGAGGCA -1.40607495766  
AAGAGGCC -0.779207307796  
AAGAGGCG -0.555492160049  
AAGAGGCT -1.20759785236  
AAGAGGGA -0.919433088397  
AAGAGGGC -1.00949671652  
AAGAGGGG -0.222878064043  
AAGAGGGT -1.02825730076  
AAGAGGTA -0.218713463323  
AAGAGGTC -0.474727842812  
AAGAGGTG -0.922366732654  
AAGAGTAA 0.295008199082  
AAGAGTAC -1.03715274633  
AAGAGTAG 0.0845206809162  
AAGAGTAT 2.16317293005  
AAGAGTCA 0.31152504093  
AAGAGTCC -0.789596430463  
AAGAGTCG 0.668086059478  
AAGAGTCT -0.80747017646  
AAGAGTGA 0.102682961609  
AAGAGTGC -0.139731566049  
AAGAGTGG -0.564489404664  
AAGAGTGT -0.329925060889  
AAGAGTTA 0.153640354019  
AAGAGTTC -0.348082969844  
AAGAGTTG -0.393859852935  
AAGATAAA 0.626190446861  
AAGATAAC 0.452933688879  
AAGATAAG 1.01660308043  
AAGATAAT 1.92853676486  
AAGATACA 0.497546232463  
AAGATACC 3.75555782212  
AAGATACG 4.7613516767

AAGATACT 4.00352487317  
AAGATAGA 0.111217842906  
AAGATAGC 1.70846972824  
AAGATAGG 1.05810586118  
AAGATAGT 0.0818859802554  
AAGATATA 4.29054091098  
AAGATATC 17.6906728136  
AAGATATG 4.61670065653  
AAGATATT 8.81897555635  
AAGATCAA 3.12167332487  
AAGATCAC 1.67451839596  
AAGATCAG 1.42096821936  
AAGATCAT 2.48940137434  
AAGATCCA 4.2393703443  
AAGATCCC 3.43610182425  
AAGATCCG 4.06656720616  
AAGATCCT 4.26540591663  
AAGATCGA 2.25752086123  
AAGATCGC 6.6254269592  
AAGATCGG 1.31877176971  
AAGATCGT 3.59904648542  
AAGATCTA 5.30288800055  
AAGATCTC 7.98511694586  
AAGATCTG 5.27548365792  
AAGATCTT 7.62246130843  
AAGATGAA 0.381203880118  
AAGATGAC 0.244328932468  
AAGATGAG -0.367964176213  
AAGATGAT 1.48870142703  
AAGATGCA -0.633807887749  
AAGATGCC -0.0199238828571  
AAGATGCG 0.192833191772  
AAGATGCT -0.446037168375  
AAGATGGA -0.715777139201  
AAGATGGC -0.314367503226  
AAGATGGG -0.603305648431  
AAGATGGT 0.5456297277  
AAGATGTA 0.812583860643  
AAGATGTC 1.18942412188  
AAGATGTG -0.505304609851  
AAGATTAA 0.580446872249  
AAGATTAC 11.527924355  
AAGATTAG 1.34861699929  
AAGATTAT 3.15573061975  
AAGATTCA 3.03654663782  
AAGATTCC 15.1290263899  
AAGATTCCG 8.23012766125  
AAGATTCT 9.82264453817  
AAGATTGA 1.28346186786  
AAGATTGC 11.4438044168  
AAGATTGG 2.73143014818  
AAGATTGT 3.33871241261  
AAGATTTA 6.21147085203  
AAGATTTTC 15.3491583781

AAGATTTG 6.48141233915  
AAGCAAAA 0.692474111186  
AAGCAAAC -0.128384408265  
AAGCAAAG 0.02643902128  
AAGCAAAT 1.19001347377  
AAGCAACA -0.678879880161  
AAGCAACC -0.759115008944  
AAGCAACG -0.0180432028817  
AAGCAACT -0.354347670143  
AAGCAAGA 1.54876743929  
AAGCAAGC -0.688410893147  
AAGCAAGG -0.160601201522  
AAGCAAGT 1.5249391782  
AAGCAATA 1.04001769185  
AAGCAATC 5.19237879553  
AAGCAATG 0.258749213763  
AAGCAATT 1.25815804117  
AAGCACAA 0.556050077066  
AAGCACAC -1.54045218577  
AAGCACAG -0.599303010188  
AAGCACAT -0.00396995429843  
AAGCACCA -0.669432138371  
AAGCACCC -0.802955836713  
AAGCACCG 0.0326693722104  
AAGCACCT 0.212830353282  
AAGCACGA 0.333410793179  
AAGCACGC -0.636449458284  
AAGCACGG -0.582815313259  
AAGCACGT 0.270449649599  
AAGCACTA 0.608138708682  
AAGCACTC -0.817277025284  
AAGCACTG 0.0867336129661  
AAGCACTT -0.302637922471  
AAGCAGAA 0.632542165561  
AAGCAGAC -0.289929072444  
AAGCAGAG -0.315701507796  
AAGCAGAT 1.75256182685  
AAGCAGCA -0.0759447885552  
AAGCAGCC -0.64617532587  
AAGCAGCG -0.168252159066  
AAGCAGCT -0.918410934459  
AAGCAGGA -0.437197514499  
AAGCAGGC -0.934193740708  
AAGCAGGG -0.738977535467  
AAGCAGGT 1.53204012949  
AAGCAGTA 0.500961184236  
AAGCAGTC 0.360096089023  
AAGCAGTG -0.577833405743  
AAGCATAA -0.352322930997  
AAGCATAC 0.472091060371  
AAGCATAG 0.0973359098966  
AAGCATAT 1.98971819479  
AAGCATCA 0.83468028902  
AAGCATCC 0.134886431474

AAGCATCG -0.0997557708701  
AAGCATCT 0.196606626047  
AAGCATGA 0.244335177808  
AAGCATGC -0.417164546374  
AAGCATGG -0.227826454902  
AAGCATGT -0.893580088163  
AAGCATT A 0.282123438652  
AAGCATTC -0.485244786766  
AAGCATTG -0.897469477579  
AAGCCAAA -0.457612697416  
AAGCCAAC -0.868236291297  
AAGCCAAG -0.532000939129  
AAGCCAAT -0.223297542696  
AAGCCACA -0.292790062582  
AAGCCACC -1.46933296306  
AAGCCACG -0.895185348656  
AAGCCACT -0.948081710879  
AAGCCAGA -0.250454986225  
AAGCCAGC -0.830996995816  
AAGCCAGG -0.442747956109  
AAGCCAGT 0.64582183964  
AAGCCATA -0.488095784359  
AAGCCATC -0.43830023332  
AAGCCATG -0.376532365988  
AAGCCATT 0.0965579487423  
AAGCCCAA -0.287161554225  
AAGCCCAC -1.11730044036  
AAGCCCAG -0.735983311415  
AAGCCCAT -0.744475516223  
AAGCCCCA -0.608761160877  
AAGCCCCC -1.3502740961  
AAGCCCCG -1.51677422919  
AAGCCCCT -1.12112841727  
AAGCCCGA -0.932330131328  
AAGCCCGC -1.47106042403  
AAGCCCGG -1.25221039595  
AAGCCCGT -0.310747704309  
AAGCCCTA -0.490966767041  
AAGCCCTC -0.879363404944  
AAGCCCTG -0.613817387935  
AAGCCCTT -1.67114882699  
AAGCCGAA 0.0324145623488  
AAGCCGAC -1.03082996438  
AAGCCGAG -0.873128890453  
AAGCCGAT 1.1584788798  
AAGCCGCA -0.0185388746795  
AAGCCGCC -1.47983387731  
AAGCCGCG -0.772917209782  
AAGCCGCT -1.26997026858  
AAGCCGGA -0.891384434886  
AAGCCGGC -1.25106395975  
AAGCCGGG -1.2598111826  
AAGCCGGT -0.200092774693  
AAGCCGTA -0.745660465351

AAGCCGTC -1.14264111456  
AAGCCGTG -0.530133166189  
AAGCCTAA -0.866792993281  
AAGCCTAC -0.363767724259  
AAGCCTAG -0.5960906156  
AAGCCTAT -0.348646924023  
AAGCCTCA -0.599284482346  
AAGCCTCC -1.39454668503  
AAGCCTCG -0.854358938203  
AAGCCTCT -1.89064379049  
AAGCCTGA -0.424812173071  
AAGCCTGC -1.11959893356  
AAGCCTGG -0.508984155851  
AAGCCTGT -0.00126988574832  
AAGCCTTA -0.8124225227  
AAGCCTTC -1.48887733744  
AAGCCTTG -0.746204850799  
AAGCGAAA 0.017666192539  
AAGCGAAC -0.958095280449  
AAGCGAAG -0.471844577629  
AAGCGAAT 3.09175460846  
AAGCGACA -0.0430012459299  
AAGCGACC -0.457155538547  
AAGCGACG -0.462182620686  
AAGCGACT -0.950595251949  
AAGCGAGA 0.0222304950033  
AAGCGAGC -0.200315525144  
AAGCGAGG -0.803962793658  
AAGCGAGT 0.598711576514  
AAGCGATA 1.99223111133  
AAGCGATC 4.48194142181  
AAGCGATG 0.604091312171  
AAGCGATT 2.74634693399  
AAGCGCAA 1.2221605274  
AAGCGCAC -0.178535527314  
AAGCGCAG -0.10124320262  
AAGCGCAT 0.548675371716  
AAGCGCCA -0.252877137156  
AAGCGCCC -1.27332276696  
AAGCGCCG -0.557502743091  
AAGCGCCT -0.655206919854  
AAGCGCGA 0.950596084661  
AAGCGCGC 0.257599863072  
AAGCGCGG 0.784628262695  
AAGCGCGT 0.657050127791  
AAGCGCTA -0.43879049249  
AAGCGCTC -0.626280379754  
AAGCGCTG -0.968933651222  
AAGCGCTT 0.967779928793  
AAGCGGAA -0.501185600111  
AAGCGGAC -0.0227590589238  
AAGCGGAG -0.802288001717  
AAGCGGAT 2.65979485223  
AAGCGGCA -0.986862772565

AAGCGGCC -1.1590671908  
AAGCGGCG -0.763058316459  
AAGCGGCT -1.48748774934  
AAGCGGGA -0.362163296479  
AAGCGGGC -0.687142672823  
AAGCGGGG -0.262184775158  
AAGCGGGT -0.0614299944519  
AAGCGGTA 0.129235231716  
AAGCGGTC -0.808158204722  
AAGCGGTG -1.45209686625  
AAGCGTAA 0.275349326808  
AAGCGTAC -0.73203792212  
AAGCGTAG 0.137581711931  
AAGCGTAT 0.603499670319  
AAGCGTCA 0.346219984998  
AAGCGTCC -1.41701596019  
AAGCGTCG 0.246105107092  
AAGCGTCT 0.197779917207  
AAGCGTGA -0.462312523753  
AAGCGTGC -0.568588012962  
AAGCGTGG -0.63355703327  
AAGCGTGT -0.320806032148  
AAGCGTTA 0.383660796774  
AAGCGTTC -0.024251486945  
AAGCGTTG -0.676935289542  
AAGCTAAA -0.215801053221  
AAGCTAAC -0.610991579878  
AAGCTAAG -0.65727933176  
AAGCTAAT -0.0838357753241  
AAGCTACA -0.215826867292  
AAGCTACC -0.608948104713  
AAGCTACG -0.724129032043  
AAGCTACT -0.995257966429  
AAGCTAGA 0.695096321167  
AAGCTAGC -0.832212338931  
AAGCTAGG -0.0134441346929  
AAGCTAGT 0.617982196833  
AAGCTATA 1.56288627885  
AAGCTATC 0.493662880209  
AAGCTATG 0.775450944117  
AAGCTATT 0.501392529034  
AAGCTCAA 1.20461944984  
AAGCTCAC -0.530794964024  
AAGCTCAG 0.135548853843  
AAGCTCAT -0.0698172775526  
AAGCTCCA -0.188356115886  
AAGCTCCC -1.26785351476  
AAGCTCCG -0.274150429755  
AAGCTCCT -1.15991614065  
AAGCTCGA -0.415235985461  
AAGCTCGC -1.20523732212  
AAGCTCGG 0.121244111334  
AAGCTCGT -0.340145767561  
AAGCTCTA -0.55176369222

AAGCTCTC -0.522744721091  
AAGCTCTG -0.97474972795  
AAGCTGAA -0.940434500538  
AAGCTGAC -0.653085586121  
AAGCTGAG -0.701737199097  
AAGCTGAT 0.947928700055  
AAGCTGCA -0.29928084418  
AAGCTGCC -1.27105258596  
AAGCTGCG -0.897224243905  
AAGCTGCT -0.985564158254  
AAGCTGGA -0.417807400012  
AAGCTGGC -1.1970280312  
AAGCTGGG 0.753334947009  
AAGCTGGT -0.832777750356  
AAGCTGTA -0.0962608787484  
AAGCTGTC 0.215365128507  
AAGCTGTG -1.57959110542  
AAGCTTAA 1.08493417531  
AAGCTTAC -0.0181497900133  
AAGCTTAG -0.106185764494  
AAGCTTAT 0.217769584309  
AAGCTTCA 0.0238642758808  
AAGCTTCC -0.0304004402808  
AAGCTTCG 1.09018234247  
AAGCTTCT 0.438387668077  
AAGCTTGA 0.574126588426  
AAGCTTGC -0.859514049808  
AAGCTTGG 0.43864122887  
AAGCTTGT 0.49752166746  
AAGCTTTA -0.0704923987791  
AAGCTTTC 1.5778442839  
AAGCTTTG -0.767040553259  
AAGGAAAA 0.739144286038  
AAGGAAAC -0.695900720926  
AAGGAAAG -0.727362036252  
AAGGAAAT 3.29267051893  
AAGGAACA -0.368571431414  
AAGGAACC -1.03117553984  
AAGGAACG -0.582518451443  
AAGGAACT -0.792892096247  
AAGGAAGA 0.534877958972  
AAGGAAGC -0.386892760092  
AAGGAAGG -0.897176987501  
AAGGAAGT 0.311229428182  
AAGGAATA 1.37130069778  
AAGGAATC 9.0287839979  
AAGGAATG 0.474184706432  
AAGGAATT 2.46744213526  
AAGGACAA 1.21396580895  
AAGGACAC -1.1215376952  
AAGGACAG -0.35064355914  
AAGGACAT -0.50164796343  
AAGGACCA -0.855291783783  
AAGGACCC -1.25727099474

AAGGACCG -1.14328896447  
AAGGACCT -0.724010995122  
AAGGACGA -0.522779278638  
AAGGACGC -1.49607280154  
AAGGACGG -0.93099904125  
AAGGACGT -1.03324066552  
AAGGACTA -0.0665511730435  
AAGGACTC -1.0810608156  
AAGGACTG -0.38517237717  
AAGGACTT 0.386502842714  
AAGGAGAA 0.453186833316  
AAGGAGAC -0.952935172573  
AAGGAGAG -0.795382321382  
AAGGAGAT 1.56845212563  
AAGGAGCA -1.44226690967  
AAGGAGCC -1.44796619854  
AAGGAGCG 0.112652189267  
AAGGAGCT -0.654071308911  
AAGGAGGA -0.408138781374  
AAGGAGGC -1.02416160695  
AAGGAGGG -0.599105449274  
AAGGAGGT -1.01467826672  
AAGGAGTA -0.40429581565  
AAGGAGTC -0.504940506544  
AAGGAGTG -0.925444019724  
AAGGATAA 1.67880228267  
AAGGATAC 0.930092426097  
AAGGATAG 0.556557823187  
AAGGATAT 5.48392999088  
AAGGATCA 0.859261738082  
AAGGATCC 1.48687195885  
AAGGATCG 2.20692070225  
AAGGATCT 4.47193805296  
AAGGATGA 0.277841425544  
AAGGATGC -0.337384286503  
AAGGATGG -0.596432443862  
AAGGATGT 0.438522567415  
AAGGATTA 2.06215809868  
AAGGATTC 3.68625432785  
AAGGATTG 1.81619496898  
AAGGCAAA 0.841669240552  
AAGGCAAC -0.300000515497  
AAGGCAAG -1.33633408143  
AAGGCAAT 0.19603830013  
AAGGCACA -0.740838438533  
AAGGCACC -1.13658771492  
AAGGCACG -1.31504038739  
AAGGCACT -1.53034472793  
AAGGCAGA -0.403385245115  
AAGGCAGC 0.453650445703  
AAGGCAGG -0.304439911166  
AAGGCAGT 0.543851679474  
AAGGCATA 0.285203848393  
AAGGCATC -0.453996645703



AAGGCATG -0.0876167040062  
AAGGCATT -0.62087337278  
AAGGCCAA 0.69660103169  
AAGGCCAC -1.16208618803  
AAGGCCAG -1.2689797577  
AAGGCCAT 0.280150744004  
AAGGCCCA -1.12988063639  
AAGGCCCC -1.37334604655  
AAGGCCCG -1.13810866333  
AAGGCCCT -0.874878210116  
AAGGCCGA -0.64121985696  
AAGGCCGC -1.13069835954  
AAGGCCGG -0.873431581253  
AAGGCCGT -0.636924728638  
AAGGCCTA -0.738108808708  
AAGGCCTC -1.27039141266  
AAGGCCTG -0.417737452207  
AAGGCCTT 0.842709922331  
AAGGCGAA -0.371300436705  
AAGGCGAC -0.653248797666  
AAGGCGAG -1.42943669187  
AAGGCGAT 1.79056138835  
AAGGCGCA -0.976104966675  
AAGGCGCC -1.08747686129  
AAGGCGCG 0.54774731423  
AAGGCGCT -0.917700214795  
AAGGCGGA -0.431486775835  
AAGGCGGC -0.316659959269  
AAGGCGGG 0.268351007267  
AAGGCGGT -1.19689563  
AAGGCGTA -0.39426038739  
AAGGCGTC -0.933846083462  
AAGGCGTG -0.163284824011  
AAGGCTAA -0.257478703481  
AAGGCTAC -0.964884589287  
AAGGCTAG -0.972304052905  
AAGGCTAT -0.0838969796536  
AAGGCTCA -0.943650850507  
AAGGCTCC -1.91168017653  
AAGGCTCG -0.876433924247  
AAGGCTCT -0.366670974529  
AAGGCTGA -0.560514245916  
AAGGCTGC -0.652870330078  
AAGGCTGG -0.689088720687  
AAGGCTGT -0.439254729411  
AAGGCTTA -0.89767765557  
AAGGCTTC -0.945494058444  
AAGGCTTG -1.10358046983  
AAGGAAA 1.0717956459  
AAGGGAAC -0.179774186364  
AAGGGAAG -0.5364422084  
AAGGGAAT 1.51222491554  
AAGGGACA -0.906106366091  
AAGGGACC -0.927040120385

AAGGGACG -0.404791903804  
AAGGGACT -1.02390304989  
AAGGGAGA -0.866639566102  
AAGGGAGC -0.646247979989  
AAGGGAGG -1.42547423198  
AAGGGAGT -0.893916295619  
AAGGGATA 1.18145028027  
AAGGGATC 1.04705369161  
AAGGGATG 0.263715716107  
AAGGGATT 3.62008599413  
AAGGGCAA -0.112909913621  
AAGGGCAC -0.869403337117  
AAGGGCAG -0.675229062724  
AAGGGCAT -0.742198465352  
AAGGGCCA -0.936352754658  
AAGGGCCC -1.07629603772  
AAGGGCCG -1.38009309525  
AAGGGCCT -1.43629053589  
AAGGGCGA -1.23791418874  
AAGGGCGC -0.488737180751  
AAGGGCGG -1.31393329683  
AAGGGCGT -0.998792204191  
AAGGGCTA -0.391313003386  
AAGGGCTC -1.10734578516  
AAGGGCTG -1.36328397151  
AAGGGGAA 0.713239865841  
AAGGGGAC -0.841995039109  
AAGGGGAG -0.814680421196  
AAGGGGAT 2.12070295435  
AAGGGGCA -1.19053204515  
AAGGGGCC -1.65835420763  
AAGGGGCG -1.21935949253  
AAGGGGCT -1.23920614135  
AAGGGGGA -0.522025049775  
AAGGGGGC -0.982910721574  
AAGGGGGG -1.74267878488  
AAGGGGGT -1.14147802412  
AAGGGGTA -0.170575217274  
AAGGGGTC -1.20992382506  
AAGGGGTG -1.22099660425  
AAGGGTAA -0.40144127903  
AAGGGTAC -0.442099689843  
AAGGGTAG -0.99911154923  
AAGGGTAT 0.344690709472  
AAGGGTCA -0.346521010373  
AAGGGTCC -1.00614005458  
AAGGGTCG -0.45324553951  
AAGGGTCT -0.879138156357  
AAGGGTGA -0.275625995359  
AAGGGTGC -0.145539315657  
AAGGGTGG -0.498642914122  
AAGGGTGT -0.274942338834  
AAGGGTTA 0.0305097337263  
AAGGGTTC -0.850864462438

AAGGGTTG -0.62926065588  
AAGGTAAG 0.906729234642  
AAGGTAAC -0.161103951371  
AAGGTAAG 0.403157498392  
AAGGTAAT 1.28264372835  
AAGGTACA -0.334830567081  
AAGGTACC -0.707890107814  
AAGGTACG -0.895530924122  
AAGGTACT 0.524369133959  
AAGGTAGA 0.0368876828527  
AAGGTAGC -0.461073864703  
AAGGTAGG -0.391718325936  
AAGGTAGT 0.346481456555  
AAGGTATA 0.50719840504  
AAGGTATC 1.74175509913  
AAGGTATG 0.806971173814  
AAGGTATT 0.626756066464  
AAGGTCAA 0.304473219645  
AAGGTCAC -0.406735661711  
AAGGTCAG 0.00632736187449  
AAGGTCAT -0.700382793084  
AAGGTCCA -0.487313451467  
AAGGTCCC -1.4293201122  
AAGGTCCG -0.091870821263  
AAGGTCCT -0.536657880799  
AAGGTCGA -0.722598091094  
AAGGTCGC -0.421050188586  
AAGGTCGG -0.304203837324  
AAGGTCGT -0.278978077378  
AAGGTCTA -0.715299162533  
AAGGTCTC -0.597993778799  
AAGGTCTG -0.893129382811  
AAGGTGAA -0.260493120798  
AAGGTGAC 1.19499288315  
AAGGTGAG 0.384989805072  
AAGGTGAT 0.324593414348  
AAGGTGCA -0.729589332583  
AAGGTGCC -1.29091692991  
AAGGTGCG -1.12775805359  
AAGGTGCT -0.701213215092  
AAGGTGGA -0.694876068852  
AAGGTGGC -0.701572530305  
AAGGTGGG -0.154774715895  
AAGGTGGT -0.445365794353  
AAGGTGTA -0.362148099485  
AAGGTGTC 0.0893235553587  
AAGGTGTG -0.757797034079  
AAGGTTAA -0.288970620971  
AAGGTTAC 0.151325206575  
AAGGTTAG -0.269608818691  
AAGGTTAT 0.0262395867641  
AAGGTTCA -0.478385530123  
AAGGTTCC -0.105852679708  
AAGGTTCCG 0.307039221568

AAGGTTCT -0.0603853572904  
AAGGTTGA -0.0913770230671  
AAGGTTGC -0.638083863695  
AAGGTTGG -0.936824902343  
AAGGTTGT -0.488384735412  
AAGGTTTA -0.153415521788  
AAGGTTTC -0.0490271660727  
AAGGTTTG -0.383901242354  
AAGTAAAA 3.69726236368  
AAGTAAAC -0.142627738267  
AAGTAAAG 0.122306651802  
AAGTAAAT 0.870359290454  
AAGTAACA -0.358296390286  
AAGTAACC 0.466709242934  
AAGTAACG 1.554396364  
AAGTAACT -0.531267111709  
AAGTAAGA 0.319698108877  
AAGTAAGC 1.02562926179  
AAGTAAGG 0.0711918768306  
AAGTAAGT 0.447670116541  
AAGTAATA 1.73294396564  
AAGTAATC 3.89712614259  
AAGTAATG -0.33569096672  
AAGTAATT 3.24731103271  
AAGTACAA 1.52273457327  
AAGTACAC -0.42749475467  
AAGTACAG -0.618675845901  
AAGTACAT -0.288339425301  
AAGTACCA -1.16006019982  
AAGTACCC 0.0526619538048  
AAGTACCG 0.163519648785  
AAGTACCT -0.550357033532  
AAGTACGA 0.625257601281  
AAGTACGC 0.421701161166  
AAGTACGG -0.852344399779  
AAGTACGT 0.111280920837  
AAGTACTA 0.506352994216  
AAGTACTC -0.13709873899  
AAGTACTG 0.179928238077  
AAGTACTT 2.55217078599  
AAGTAGAA 0.843890707899  
AAGTAGAC -0.693779595371  
AAGTAGAG -0.224105481481  
AAGTAGAT 1.68432815928  
AAGTAGCA -0.134837717824  
AAGTAGCC -0.528352619827  
AAGTAGCG -0.233864033012  
AAGTAGCT -0.994722324457  
AAGTAGGA -0.289016003774  
AAGTAGGC 0.877314933507  
AAGTAGGG -0.116463511936  
AAGTAGGT -0.574912252166  
AAGTAGTA 0.683156480641  
AAGTAGTC 0.306725289157

AAGTAGTG -0.306706969494  
AAGTATAA 2.74909529983  
AAGTATAC -0.160526257445  
AAGTATAG 0.55428139685  
AAGTATAT 2.03139022425  
AAGTATCA 1.67783550408  
AAGTATCC 1.90698784461  
AAGTATCG 2.76701172231  
AAGTATCT 3.3629360037  
AAGTATGA 0.549989183021  
AAGTATGC 0.195792025566  
AAGTATGG 0.0867336129661  
AAGTATGT 0.784237720783  
AAGTATTA 1.29041834362  
AAGTATTC 0.188204562308  
AAGTATTG 0.731072392595  
AAGTCAAA 0.443529456289  
AAGTCAAC 0.0112422360765  
AAGTCAAG -0.134192782407  
AAGTCAAT -0.43162417331  
AAGTCACA -0.239684065121  
AAGTCACC -0.97336284617  
AAGTCACG -0.243007002222  
AAGTCACT -0.686902019064  
AAGTCAGA 0.0984111492229  
AAGTCAGC -0.120779458057  
AAGTCAGG -0.705581413888  
AAGTCAGT 1.01967578759  
AAGTCATA 2.03791181619  
AAGTCATC -0.479370212023  
AAGTCATG -0.952970146476  
AAGTCATT 1.40861202285  
AAGTCCAA 0.200280967597  
AAGTCCAC -0.512536713277  
AAGTCCAG -0.447816673847  
AAGTCCAT -0.355382314761  
AAGTCCCA -0.490544165718  
AAGTCCCC -0.893102944207  
AAGTCCCG 0.151073519384  
AAGTCCCT -0.656571318411  
AAGTCCGA 0.103085994201  
AAGTCCGC -0.0339267672792  
AAGTCCGG -0.709975634933  
AAGTCCGT -0.647363397668  
AAGTCCTA -0.254255067282  
AAGTCCTC -1.30395595023  
AAGTCCTG -0.453058595673  
AAGTCGAA 0.606989982525  
AAGTCGAC -1.13675425731  
AAGTCGAG -1.30944268938  
AAGTCGAT 0.453232216118  
AAGTCGCA -0.770606850432  
AAGTCGCC -1.48718485037  
AAGTCGCG -0.328468023126

AAGTCGCT -1.23619089132  
AAGTCGGA -0.0011941089594  
AAGTCGGC -0.461973193627  
AAGTCGGG -0.503803646532  
AAGTCGGT -0.56591292577  
AAGTCGTA 0.0757345287838  
AAGTCGTC -0.911038102711  
AAGTCGTG -0.55973128849  
AAGTCTAA 1.24416993738  
AAGTCTAC 0.20433336038  
AAGTCTAG -0.334044070629  
AAGTCTAT -0.297931018083  
AAGTCTCA -0.218256928987  
AAGTCTCC -0.801374933046  
AAGTCTCG 0.180405382034  
AAGTCTCT -0.879627166459  
AAGTCTGA -0.68253361209  
AAGTCTGC -0.501827204681  
AAGTCTGG -0.494846996625  
AAGTCTGT 0.642881533688  
AAGTCTTA 1.04430574212  
AAGTCTTC -0.417348575719  
AAGTCTTG 0.496138116528  
AAGTGAAA 0.732605415324  
AAGTGAAC -0.400785102001  
AAGTGAAG -0.275568121877  
AAGTGAAT 1.29642802588  
AAGTGACA 1.05354572228  
AAGTGACC 0.897094340838  
AAGTGACG 0.328680781033  
AAGTGACT 0.00584855249398  
AAGTGAGA 0.692003628925  
AAGTGAGC 0.733279703839  
AAGTGAGG 0.0159056312647  
AAGTGAGT -0.119092799969  
AAGTGATA 2.78413873386  
AAGTGATC 0.969529040278  
AAGTGATG 2.03586272022  
AAGTGATT 3.65398299196  
AAGTGCAA 1.97536140779  
AAGTGCAC -0.238344231568  
AAGTGCAG -0.607690709644  
AAGTGCAT 0.681591814857  
AAGTGCCA -0.636977189492  
AAGTGCCC -0.498488446053  
AAGTGCCG -0.493413899331  
AAGTGCCT -0.776427923431  
AAGTGCGA -0.0436299434643  
AAGTGCGC 0.571064498349  
AAGTGCGG -1.03076418013  
AAGTGCGT 0.528717555846  
AAGTGCTA -0.473078656763  
AAGTGCTC -0.7270087582  
AAGTGCTG -0.31180691393

AAGTGGAA 0.594471199004  
AAGTGGAC 0.331789502981  
AAGTGGAG -0.43747001949  
AAGTGGAT 0.450225917743  
AAGTGGCA -0.842631647407  
AAGTGGCC -1.80504620482  
AAGTGGCG -0.585050520354  
AAGTGGCT -1.00259894694  
AAGTGGGA -0.0502845611415  
AAGTGGGC -0.458803059172  
AAGTGGGG -0.841704422632  
AAGTGGGT -0.88987389538  
AAGTGGTA 0.24390383301  
AAGTGGTC -0.796326200395  
AAGTGGTG -0.134236916141  
AAGTGTA 0.99784291255  
AAGTGTAC -0.868785048482  
AAGTGTAG 0.177390964717  
AAGTGTAT 0.429180580045  
AAGTGTCA 0.403191015049  
AAGTGTCC -0.532000939129  
AAGTGTCCG 0.502365969323  
AAGTGTCT 0.215341396216  
AAGTGTGA 0.509802919892  
AAGTGTGC -0.408971909696  
AAGTGTGG 0.206092672586  
AAGTGTGT -0.846386137484  
AAGTGTTA 1.02582952902  
AAGTGTTTC 0.013046306551  
AAGTGTTG 0.527106258192  
AAGTTAAA 2.88823314225  
AAGTTAAC 0.668686444806  
AAGTTAAG -0.513467060721  
AAGTTAAT 0.983927046528  
AAGTTACA -0.289926990665  
AAGTTACC -0.170614771092  
AAGTTACG 0.678423762182  
AAGTTACT 0.013783464819  
AAGTTAGA 0.755645306359  
AAGTTAGC 0.0426494251243  
AAGTTAGG -0.0613806562679  
AAGTTAGT 0.557417390114  
AAGTTATA 1.30882002901  
AAGTTATC -0.219822635662  
AAGTTATG 1.23734669553  
AAGTTATT 0.909960989782  
AAGTTCAA 1.51692724002  
AAGTTCAC -0.465107521467  
AAGTTCAG -0.267445016648  
AAGTTCAT -0.290933323076  
AAGTTCCA 0.144268389019  
AAGTTCCC -0.663568388884  
AAGTTCCG -0.178645028938  
AAGTTCCT -0.226630472341

AAGTTCGA 0.886850734587  
AAGTTCGC -0.652161275838  
AAGTTCGG 0.0392488376327  
AAGTTCGT 0.583982775435  
AAGTTCTA 0.307048797756  
AAGTTCTC -0.400382693943  
AAGTTCTG 0.567027302559  
AAGTTGAA 0.163349567366  
AAGTTGAC -0.247036911782  
AAGTTGAG 0.330861445495  
AAGTTGAT 0.20280241943  
AAGTTGCA -0.653062686542  
AAGTTGCC -0.489520138178  
AAGTTGCG 0.234883896993  
AAGTTGCT -0.950103119177  
AAGTTGGA 0.487065511479  
AAGTTGGC -0.534496993247  
AAGTTGGG 0.417238241383  
AAGTTGGT -0.0688169823033  
AAGTTGTA 0.509133835827  
AAGTTGTC 0.275094933302  
AAGTTGTG -0.481849195546  
AAGTTTAA 0.364771142179  
AAGTTTAC -0.395434511263  
AAGTTTAG 0.00935551893925  
AAGTTTAT 0.273530892052  
AAGTTTCA 1.33336962683  
AAGTTTCC 0.613521150653  
AAGTTTCG 0.180405382034  
AAGTTTCT -0.317839079413  
AAGTTTGA 0.185507200072  
AAGTTTGC -0.458234941433  
AAGTTTGG -0.347496324264  
AAGTTTGT -0.147313200323  
AAGTTTTA 0.192946856955  
AAGTTTTC -0.0151307927802  
AAGTTTTG 0.453483070598  
AATAAAAA 3.24013139014  
AATAAAAC 0.503773668901  
AATAAAAG 0.263829797647  
AATAAAAT 2.92430018746  
AATAAACA 0.392729030085  
AATAAACC 0.085778492341  
AATAAACG 0.984124399264  
AATAAACT 1.145149243  
AATAAAGA 1.80736926303  
AATAAAGC 1.15421497817  
AATAAAGG 2.04692633958  
AATAAAGT 0.170138043492  
AATAAATA 2.82537025868  
AATAAATC 3.28113287828  
AATAAATG -0.482506205287  
AATAAATT 5.13096566349  
AATAACAA 1.1268441522



AATAACAC 0.0740526587902  
AATAACAG 0.416562703801  
AATAACAT 0.538284167269  
AATAACCA 0.105948025228  
AATAACCC 0.381565693467  
AATAACCG 1.46228426444  
AATAACCT -0.387097815414  
AATAACGA 1.57496310049  
AATAACGC 0.0392353060632  
AATAACGG 0.470833248946  
AATAACGT 1.24855562313  
AATAACTA 0.706881693623  
AATAACTC 0.993099368835  
AATAACTG 0.723616706006  
AATAAGAA 1.04789223256  
AATAAGAC -0.235627925134  
AATAAGAG 0.8797431216  
AATAAGAT 2.38651960275  
AATAAGCA 1.21591164863  
AATAAGCC 0.0724297031683  
AATAAGCG 0.239988421345  
AATAAGCT 0.995232776892  
AATAAGGA 0.624386584565  
AATAAGGC 1.47059181537  
AATAAGGG -0.237155951592  
AATAAGGT 0.498530081651  
AATAAGTA 1.1830684478  
AATAAGTC 0.799371428055  
AATAAGTG 0.455090621049  
AATAATAA 2.25402638547  
AATAATAC 1.14629463831  
AATAATAG 2.64384945897  
AATAATAT 2.64658679138  
AATAATCA 3.07385067665  
AATAATCC 2.06269374066  
AATAATCG 2.97261267848  
AATAATCT 4.26221204989  
AATAATGA 2.39051537112  
AATAATGC 2.34137807889  
AATAATGG 1.79031136658  
AATAATGT 1.96494834465  
AATAATTA 1.56829807392  
AATAATTC 0.630503686668  
AATAATTG 0.289290382366  
AATACAAA 1.70382402818  
AATACAAC -0.102590738759  
AATACAAG -0.036586449299  
AATACAAT 1.87425622718  
AATACACA 0.0634447410539  
AATACACC 0.735921066196  
AATACACG 1.60650810337  
AATACACT 0.731761669925  
AATACAGA 1.66201480943  
AATACAGC 1.40980842176

AATACAGG 1.84763047024  
AATACAGT 0.763497780199  
AATACATA 3.38645095691  
AATACATC 0.506013247734  
AATACATG 0.973859767036  
AATACATT 1.92861087623  
AATACCAA 0.509085122177  
AATACCAC 1.61925317637  
AATACCAG 0.178323602119  
AATACCAT 0.544784733232  
AATACCCA 1.88932644016  
AATACCCC 0.172663242529  
AATACCCG 0.473902208897  
AATACCCCT 0.127562521554  
AATACCGA 0.903221019129  
AATACCGC 1.48795469258  
AATACCGG 0.847554224194  
AATACCGT 0.331134991375  
AATACCTA 1.7634457886  
AATACCTC -0.0543325821868  
AATACCTG 0.584308157636  
AATACGAA 2.25618893844  
AATACGAC -0.330115335573  
AATACGAG 1.69979162049  
AATACGAT 3.79153097905  
AATACGCA 1.59062308173  
AATACGCC 1.25524667195  
AATACGCG 0.476855421885  
AATACGCT 1.5675973468  
AATACGGA 1.30117365138  
AATACGGC 0.579608539477  
AATACGGG 0.910876764767  
AATACGGT 1.02131518927  
AATACGTA 2.18149967135  
AATACGTC 1.63108434798  
AATACGTG 3.00470414859  
AATACTAA 1.12200151576  
AATACTAC 1.42724145495  
AATACTAG 0.381459730869  
AATACTAT 1.78727550693  
AATACTCA 1.76722172101  
AATACTCC 0.0769151061737  
AATACTCG 1.84006236753  
AATACTCT 0.470712922067  
AATACTGA 2.84666041369  
AATACTGC 1.05190465517  
AATACTGG 0.817014304659  
AATACTGT 3.04684686848  
AATACTTA 0.929213706795  
AATACTTC 0.721571149062  
AATACTTG 1.35475825004  
AATAGAAA 0.498977872511  
AATAGAAC 0.566398605025  
AATAGAAG -0.502466727471

AATAGAAT 3.35919379612  
AATAGACA 0.961117816708  
AATAGACC -0.120314804779  
AATAGACG 2.40660045181  
AATAGACT 0.158321444337  
AATAGAGA 2.00492018445  
AATAGAGC -0.174474182877  
AATAGAGG 0.636417190695  
AATAGAGT 0.350202429975  
AATAGATA 3.16274954891  
AATAGATC 3.21488314697  
AATAGATG 2.84326898603  
AATAGATT 6.1415596862  
AATAGCAA 1.70098697851  
AATAGCAC 0.588797307845  
AATAGCAG 0.361596635986  
AATAGCAT 0.556993747901  
AATAGCCA -0.581716757997  
AATAGCCC 0.064574314836  
AATAGCCG 0.519565634983  
AATAGCCT -0.228302557969  
AATAGCGA 0.713645812924  
AATAGCGC 0.746412820613  
AATAGCGG -0.726988773113  
AATAGCGT 0.356665940256  
AATAGCTA -0.0176280959666  
AATAGCTC -0.798492500575  
AATAGCTG -0.620726399118  
AATAGGAA 1.23335862975  
AATAGGAC -0.93724188286  
AATAGGAG -0.0993725151877  
AATAGGAT 1.49168545037  
AATAGGCA -0.574125963892  
AATAGGCC -0.587737681868  
AATAGGCG -0.976579196139  
AATAGGCT -0.428102426227  
AATAGGGA 0.704785341249  
AATAGGGC -0.176254937417  
AATAGGGG 0.153793781199  
AATAGGGT -0.457886659653  
AATAGGTA 0.193096328753  
AATAGGTC -0.621632806093  
AATAGGTG 0.182334567481  
AATAGTAA 1.75185235625  
AATAGTAC -0.36769396118  
AATAGTAG -0.254817147859  
AATAGTAT 0.958016380991  
AATAGTCA -0.633676943793  
AATAGTCC 0.486273810578  
AATAGTCG 0.174697974218  
AATAGTCT 0.700570153276  
AATAGTGA 0.0955534899332  
AATAGTGC 0.572942055654  
AATAGTGG -0.119732530937

AATAGTGT -0.0752938159757  
AATAGTTA 1.90573336403  
AATAGTTC 0.541760323371  
AATAGTTG 1.28445362781  
AATATAAA 4.34239221968  
AATATAAC 1.9139601419  
AATATAAG 1.92188839253  
AATATAAT 2.03265657097  
AATATACA 2.05317542653  
AATATACC 1.07556783111  
AATATACG 3.12561205247  
AATATACT 2.57689754329  
AATATAGA 2.49197237254  
AATATAGC 3.28615392326  
AATATAGG 0.691079318642  
AATATAGT 2.19345241891  
AATATATA 2.8709425028  
AATATATC 4.65331562622  
AATATATG 3.422702656  
AATATATT 6.95321777932  
AATATCAA 3.72477162802  
AATATCAC 4.84192093116  
AATATCAG 3.15828829455  
AATATCAT 2.84445393516  
AATATCCA 5.11007312844  
AATATCCC 4.92151965982  
AATATCCG 10.3872428199  
AATATCCT 6.92280339111  
AATATCGA 3.21161308708  
AATATCGC 5.50058797741  
AATATCGG 7.19385155244  
AATATCGT 2.98788253416  
AATATCTA 4.98447726437  
AATATCTC 6.58945047141  
AATATCTG 7.08285979083  
AATATGAA 4.99324447231  
AATATGAC 0.375112800264  
AATATGAG 1.27481165595  
AATATGAT 3.01310121606  
AATATGCA 1.37042739111  
AATATGCC 0.583437557275  
AATATGCG 1.62306304179  
AATATGCT 0.820089718128  
AATATGGA 1.67454421003  
AATATGGC 0.765751931491  
AATATGGG 3.19162341998  
AATATGGT 1.40273619904  
AATATGTA 1.28691928794  
AATATGTC 1.55303071637  
AATATGTG 1.36682216465  
AATATTAA 3.14341980604  
AATATTAC 2.30137168154  
AATATTAG 2.32095685881  
AATATTAT 1.22199231959

AATATTCA 0.938744927959  
AATATTCC 4.22174911821  
AATATTCT 2.83097295297  
AATATTCT 3.78698686986  
AATATTGA 1.46208025001  
AATATTGC 2.90098779143  
AATATTGG 1.93141420106  
AATATTGT 1.7438808046  
AATATTTA 2.86910429114  
AATATTTT 4.78520179648  
AATATTTG 3.1020181998  
AATCAAAA 4.30042103845  
AATCAAAC 2.78351524077  
AATCAAAG 1.00314853684  
AATCAAAT 2.72516086797  
AATCAACA 3.56734618176  
AATCAACC 0.825994895036  
AATCAACG 2.4327234589  
AATCAACT 3.30394793709  
AATCAAGA 3.9832264781  
AATCAAGC 1.21564705441  
AATCAAGG 3.50093032441  
AATCAAGT 2.7173918735  
AATCAATA 3.67204243272  
AATCAATC 2.39647009439  
AATCAATG 1.27461513593  
AATCAATT 4.0038858538  
AATCACAA 3.2546919834  
AATCACAC 2.51126839057  
AATCACAG 3.21412662815  
AATCACAT 1.89747993938  
AATCACCA 3.01017048629  
AATCACCC 0.804040027693  
AATCACCG 2.25402638547  
AATCACCT 1.8220574694  
AATCACGA 4.86165412297  
AATCACGC 2.263552194  
AATCACGG 2.6881228806  
AATCACGT 1.45335884124  
AATCACTA 1.62369507017  
AATCACTC 2.27092107037  
AATCACTG 2.99025951047  
AATCAGAA 4.06787144128  
AATCAGAC 1.40484462573  
AATCAGAG 1.72438618476  
AATCAGAT 2.76405538666  
AATCAGCA 2.72563030934  
AATCAGCC 1.24488211429  
AATCAGCG 3.55045795037  
AATCAGCT 2.33127499278  
AATCAGGA 4.94017740413  
AATCAGGC 2.76710769237  
AATCAGGG 3.88724830507  
AATCAGGT 2.37311335645

AATCAGTA 2.22140780869  
AATCAGTC 1.41617741924  
AATCAGTG 2.95608417867  
AATCATAA 3.55812577034  
AATCATAC 2.73230699388  
AATCATAG 4.52277990659  
AATCATAT 2.11801371106  
AATCATCA 2.04518243254  
AATCATCC 1.41967439314  
AATCATCG 2.46128048307  
AATCATCT 2.59435160246  
AATCATGA 3.8948530471  
AATCATGC 0.602422973747  
AATCATGG 0.587937324562  
AATCATGT 5.1773978909  
AATCATT 1.95283987995  
AATCATTC 1.85968730679  
AATCATTG 2.79971211305  
AATCCAAA 6.20284187428  
AATCCAAC 4.22344264617  
AATCCAAG 4.26109038687  
AATCCAAT 5.41450013257  
AATCCACA 6.18008781163  
AATCCACC 5.43006476829  
AATCCACG 5.08243229562  
AATCCACT 2.81081778436  
AATCCAGA 5.60843500228  
AATCCAGC 4.6812424956  
AATCCAGG 4.52342942192  
AATCCAGT 6.59793101826  
AATCCATA 5.29138741559  
AATCCATC 6.94896595202  
AATCCATG 6.93527866543  
AATCCATT 6.92404871186  
AATCCCAA 5.14710632771  
AATCCCAC 2.48366919334  
AATCCCAG 3.82299187802  
AATCCCAT 2.43473903822  
AATCCCCA 3.77358374623  
AATCCCCC 1.29032882709  
AATCCCCG 3.61631464164  
AATCCCCT 2.55857392465  
AATCCCGA 3.44681050013  
AATCCCGC 2.88555888777  
AATCCCGG 3.19282002707  
AATCCCGT 5.98781774132  
AATCCCTA 2.21428624777  
AATCCCTC 3.89062516027  
AATCCCTG 3.17547963309  
AATCCGAA 8.4544121758  
AATCCGAC 3.9635811374  
AATCCGAG 3.94252143542  
AATCCGAT 8.63981945044  
AATCCGCA 7.47785712831

AATCCGCC 4.57728277837  
AATCCGCG 7.86248054012  
AATCCGCT 5.17053925879  
AATCCGGA 8.77253916538  
AATCCGGC 4.82001519382  
AATCCGGG 2.99953300728  
AATCCGGT 5.96183421349  
AATCCGTA 5.28568583676  
AATCCGTC 5.19120675344  
AATCCGTG 2.11748389807  
AATCCTAA 6.42816540519  
AATCCTAC 4.11754375095  
AATCCTAG 6.06665453854  
AATCCTAT 3.56654407196  
AATCCTCA 5.4325183541  
AATCCTCC 3.50174700667  
AATCCTCG 5.41470497972  
AATCCTCT 3.90325282088  
AATCCTGA 5.54466300542  
AATCCTGC 4.20995437774  
AATCCTGG 4.59516152064  
AATCCTGT 4.98189835541  
AATCCTTA 2.53173957337  
AATCCTTC 2.15658243119  
AATCCTTG 4.97108475782  
AATCGAAA 5.50374811932  
AATCGAAC 2.28368258943  
AATCGAAG 3.31992039349  
AATCGAAT 3.99699203961  
AATCGACA 3.17465483189  
AATCGACC 0.401134424671  
AATCGACG 1.80079687566  
AATCGACT 2.04549657313  
AATCGAGA 3.70174152135  
AATCGAGC 2.04974798408  
AATCGAGG 2.09448522628  
AATCGAGT 1.23806699138  
AATCGATA 3.26513023608  
AATCGATC 3.77619346553  
AATCGATG 3.66745918606  
AATCGATT 4.9076558383  
AATCGCAA 3.15901983201  
AATCGCAC 3.29657094178  
AATCGCAG 1.25287302649  
AATCGCAT 4.19051763139  
AATCGCCA 2.47253375258  
AATCGCCC 0.659384219432  
AATCGCCG 2.58711491911  
AATCGCCT 3.27090217907  
AATCGCGA 5.01960938222  
AATCGCGC 2.81617441226  
AATCGCGG 3.80919467346  
AATCGCGT 4.93477060534  
AATCGCTA 2.54256024901

AATCGCTC 1.48062266372  
AATCGCTG 1.40724491798  
AATCGGAA 3.30283897293  
AATCGGAC 1.20563244395  
AATCGGAG -0.0942388459167  
AATCGGAT 5.6482259354  
AATCGGCA 1.62125897132  
AATCGGCC 0.234607852976  
AATCGGCG 1.3344094759  
AATCGGCT 0.97454654623  
AATCGGGA 3.26795104786  
AATCGGGC 1.59539681125  
AATCGGGG 2.372133879  
AATCGGGT 2.73763052148  
AATCGGTA 2.53415235629  
AATCGGTC 1.80951183092  
AATCGGTG 1.51652212564  
AATCGTAA 4.93141935603  
AATCGTAC 1.93591084568  
AATCGTAG 3.47376018202  
AATCGTAT 4.3230891236  
AATCGTCA 2.27069727903  
AATCGTCC 1.86656967119  
AATCGTCG 4.42994397215  
AATCGTCT 4.82794573441  
AATCGTGA 1.98002938289  
AATCGTGC 2.6178274182  
AATCGTGG 1.55772721186  
AATCGTGT 3.12209509348  
AATCGTTA 3.6675174759  
AATCGTTC 1.45394340504  
AATCGTTG 2.87472030882  
AATCTAAA 9.32651724689  
AATCTAAC 4.27905219216  
AATCTAAG 4.61641461997  
AATCTAAT 6.31645751129  
AATCTACA 4.85786465899  
AATCTACC 5.62451800119  
AATCTACG 5.11506024041  
AATCTACT 6.37297512968  
AATCTAGA 8.26929031319  
AATCTAGC 5.92352738127  
AATCTAGG 8.17160403974  
AATCTAGT 5.63590658639  
AATCTATA 6.81960851982  
AATCTATC 4.30506673851  
AATCTATG 4.62213680842  
AATCTCAA 7.67798987318  
AATCTCAC 4.9527392805  
AATCTCAG 7.72982702578  
AATCTCAT 5.95129228818  
AATCTCCA 6.97615025051  
AATCTCCC 5.54193462466  
AATCTCCG 9.24976077235



AATCTCCT 5.36831667786  
AATCTCGA 10.6596430973  
AATCTCGC 4.97628212956  
AATCTCGG 7.07872246143  
AATCTCGT 10.6560822128  
AATCTCTA 4.10100900579  
AATCTCTC 5.51950094794  
AATCTCTG 6.13373156919  
AATCTGAA 13.7736492267  
AATCTGAC 4.41561466464  
AATCTGAG 8.8124691614  
AATCTGAT 5.23180062907  
AATCTGCA 4.58161267242  
AATCTGCC 2.45968875414  
AATCTGCG 6.77380415724  
AATCTGCT 5.2618373824  
AATCTGGA 10.198653961  
AATCTGGC 7.1310933824  
AATCTGGG 5.8945352651  
AATCTGGT 9.5572371677  
AATCTGTA 7.5316590648  
AATCTGTC 6.82281508543  
AATCTGTG 6.17059177255  
AATCTTAA 5.89102684141  
AATCTTAC 3.39700599744  
AATCTTAG 4.3087539871  
AATCTTAT 5.09391518545  
AATCTTCA 7.98690436209  
AATCTTCC 5.88656787701  
AATCTTCG 8.0212433218  
AATCTTCT 7.45849990595  
AATCTTGA 5.74924388943  
AATCTTGC 5.00803635132  
AATCTTGG 5.40811656264  
AATCTTGT 4.77928662702  
AATCTTTA 4.72595121742  
AATCTTTC 5.00041578776  
AATCTTTG 5.36831667786  
AATGAAAA 1.27923835277  
AATGAAAC 0.610473424857  
AATGAAAG -0.259908140642  
AATGAAAT 2.27995578702  
AATGAACA 0.399985490335  
AATGAACC -0.591272544164  
AATGAACG -0.376011921009  
AATGAACT -0.57795289991  
AATGAAGA 0.957424322783  
AATGAAGC -0.579423677421  
AATGAAGG 1.68779765368  
AATGAAGT 0.444361543721  
AATGAATA 0.403996039342  
AATGAATC 2.7686444623  
AATGAATG 0.0660382224724  
AATGAATT 0.600971140434

AATGACAA 0.20443599213  
AATGACAC -0.674400722495  
AATGACAG -0.536420766067  
AATGACAT -0.0261221743769  
AATGACCA 0.0700456488093  
AATGACCC -0.0331590068465  
AATGACCG 1.14891310109  
AATGACCT -0.505959537812  
AATGACGA 0.213095363865  
AATGACGC 0.0107813300032  
AATGACGG -0.373701978015  
AATGACGT 0.443529456289  
AATGACTA 0.971144917848  
AATGACTC 1.20589849542  
AATGACTG 0.239974889776  
AATGAGAA 0.696633923812  
AATGAGAC -0.518638410208  
AATGAGAG -0.397700736878  
AATGAGAT 1.60420419754  
AATGAGCA -0.00152261383003  
AATGAGCC -0.844542305013  
AATGAGCG -0.253688614967  
AATGAGCT -0.933217802284  
AATGAGGA 0.360436876395  
AATGAGGC -0.738364451282  
AATGAGGG 0.40607448841  
AATGAGGT 0.318585189334  
AATGAGTA 2.27995578702  
AATGAGTC 1.48117475175  
AATGAGTG -1.07322978409  
AATGATAA 0.86456777873  
AATGATAC 0.71925058899  
AATGATAG 1.46444140479  
AATGATAT 2.57594075724  
AATGATCA 0.628214977829  
AATGATCC 1.39675295538  
AATGATCG 0.88531125834  
AATGATCT 0.471650139385  
AATGATGA 0.469511735056  
AATGATGC -0.146032697497  
AATGATGG 1.2356604538  
AATGATGT 0.610759877773  
AATGATTA 2.12885645357  
AATGATTC 2.53222504444  
AATGATTG 0.755253515379  
AATGCAAA 0.564675723967  
AATGCAAC 0.316715334614  
AATGCAAG 1.46298249343  
AATGCAAT 2.94086262028  
AATGCACA 0.428120537712  
AATGCACC -0.892944520755  
AATGCACG -0.96898153216  
AATGCACT 0.368345141937  
AATGCAGA 0.918112615397

AATGCAGC 0.427778917628  
AATGCAGG 2.76294059351  
AATGCAGT 0.316602502143  
AATGCATA 1.79482362455  
AATGCATC 0.936255535536  
AATGCATG -0.470230781839  
AATGCATT 0.549989183021  
AATGCCAA 0.0862764540967  
AATGCCAC -0.426321255332  
AATGCCAG -0.59328583352  
AATGCCAT -0.4821400202  
AATGCCCA 0.792192826373  
AATGCCCC -0.459942625497  
AATGCCCG -0.594000716743  
AATGCCCT -0.285012324641  
AATGCCGA 0.181907802599  
AATGCCGC -0.680365646486  
AATGCCGG -0.246834562774  
AATGCCGT 0.835488435983  
AATGCCTA 0.0519306245205  
AATGCCTC -0.193400684977  
AATGCCTG -0.810655091552  
AATGCGAA 0.244212769149  
AATGCGAC -0.896425673129  
AATGCGAG -0.513024682489  
AATGCGAT 0.880365573795  
AATGCGCA 0.567188015969  
AATGCGCC -0.851045160934  
AATGCGCG -0.376220099001  
AATGCGCT -0.112584323242  
AATGCGGA -0.0218243397418  
AATGCGGC -0.877367394361  
AATGCGGG 0.00823010871705  
AATGCGGT -0.226321952557  
AATGCGTA 1.31064699906  
AATGCGTC 0.706654779613  
AATGCGTG -0.012530649666  
AATGCTAA 2.20934909853  
AATGCTAC -0.41406789875  
AATGCTAG 0.597487073567  
AATGCTAT 0.368516056068  
AATGCTCA -0.0857018828401  
AATGCTCC -0.269556357838  
AATGCTCG 0.180926243369  
AATGCTCT -0.350866101412  
AATGCTGA 0.303568686271  
AATGCTGC -0.551485774602  
AATGCTGG -0.73346310865  
AATGCTGT 0.601381251077  
AATGCTTA 0.488144081654  
AATGCTTC -0.229739402466  
AATGCTTG 0.084648710381  
AATGAAA 0.345750127271  
AATGGAAC -0.081599943695

AATGGAAG -1.13978699429  
AATGGAAT 0.837302290823  
AATGGACA 0.304715122471  
AATGGACC -0.907713916542  
AATGGACG -0.604294910246  
AATGGACT -0.383964320285  
AATGGAGA 0.450477604934  
AATGGAGC 0.169787679932  
AATGGAGG -0.184520228214  
AATGGAGT -0.0895317333502  
AATGGATA 4.81754016568  
AATGGATC 2.22725990021  
AATGGATG 0.880769439098  
AATGGCAA 0.574072462148  
AATGGCAC -0.481800898252  
AATGGCAG -0.319979565521  
AATGGCAT 0.276112715503  
AATGGCCA 0.0694009215695  
AATGGCCC -1.06710331398  
AATGGCCG -0.495828972211  
AATGGCCT -1.02457421573  
AATGGCGA 0.598632468877  
AATGGCGC -0.229683194408  
AATGGCGG -0.253935514065  
AATGGCGT 0.00399118845357  
AATGGCTA -0.0663534039516  
AATGGCTC 0.0709591338361  
AATGGCTG -1.09408318168  
AATGGGAA 0.323113477006  
AATGGGAC -0.756914359395  
AATGGGAG -1.0712404352  
AATGGGAT 1.47797234971  
AATGGGCA -0.358381951441  
AATGGGCC -1.09314721343  
AATGGGCG -1.4040664564  
AATGGGCT -0.914071672403  
AATGGGGA -0.0958438982313  
AATGGGGC -0.314683517417  
AATGGGGG -0.528509169677  
AATGGGGT 0.61279794031  
AATGGGTA 0.0900007583652  
AATGGGTC -0.611269081141  
AATGGGTG 0.480315131926  
AATGGTAA 1.23348332836  
AATGGTAC 0.266397048638  
AATGGTAG 0.0957631251706  
AATGGTAT 1.32109919966  
AATGGTCA 0.448508241135  
AATGGTCC 0.310682752776  
AATGGTCG 0.0802292997988  
AATGGTCT 0.0167406331887  
AATGGTGA -0.0221742869456  
AATGGTGC -0.0824253694315  
AATGGTGG 0.0626172335376

AATGGTGT 0.828023797741  
AATGGTTA -0.11209010869  
AATGGTTC 0.194448652986  
AATGGTTG -0.15293442245  
AATGTAAA 1.95835076774  
AATGTAAC 0.218365181543  
AATGTAAG -0.000209427059477  
AATGTAAT 2.75770679063  
AATGTACA 1.16030293536  
AATGTACC -0.351887630817  
AATGTACG 0.332799790774  
AATGTACT 0.801382427453  
AATGTAGA 2.92324763953  
AATGTAGC -0.420730219013  
AATGTAGG 0.395089768509  
AATGTAGT 0.816754290348  
AATGTATA 1.82088105557  
AATGTATC 1.79623049142  
AATGTATG 1.22352617503  
AATGTCAA 0.665865216665  
AATGTCAC 0.301516259453  
AATGTCAG 0.0404789613846  
AATGTCAT 0.541308368952  
AATGTCCA 0.291308459816  
AATGTCCC -0.213981993931  
AATGTCCG -0.682129746787  
AATGTCCT -0.682331054905  
AATGTCGA 0.978579370282  
AATGTCGC 0.379893816017  
AATGTCGG 0.504615124343  
AATGTCGT 0.805117556977  
AATGTCTA 0.443741797841  
AATGTCTC 0.691027690501  
AATGTCTG -0.820124900209  
AATGTGAA 2.83276640636  
AATGTGAC -0.188867401033  
AATGTGAG 1.35913311053  
AATGTGAT 0.786349270151  
AATGTGCA 0.309890843696  
AATGTGCC -0.294066610026  
AATGTGCG -0.629353086909  
AATGTGCT -0.177852287146  
AATGTGGA 0.28498651057  
AATGTGGC 0.178800746075  
AATGTGGG -0.726552848399  
AATGTGGT 0.710426756641  
AATGTGTA 1.46010880443  
AATGTGTC 1.11511582052  
AATGTGTG 0.567676401537  
AATGTTAA 2.82494078748  
AATGTTAC 1.13795336254  
AATGTTAG 1.3097243542  
AATGTTAT 0.351573698406  
AATGTTCA 0.154402910002

AATGTTCC 0.268263988866  
AATGTTCCG -1.09975103567  
AATGTTCT 0.0935324979914  
AATGTTGA 1.6939817891  
AATGTTGC 0.908351149374  
AATGTTGG 0.374042349031  
AATGTTGT 1.87118830811  
AATGTTTA 1.23688578946  
AATGTTTC 0.784203579593  
AATGTTTG 0.215810213053  
AATTA AAA 1.3020919245  
AATTA AAC -0.0666496412335  
AATTA AAG 0.670818187439  
AATTA AAT 1.1623447451  
AATTA ACA 0.997207969676  
AATTA ACC -0.168345214629  
AATTA ACG -0.034939969564  
AATTA ACT 0.762816413633  
AATTA AGA 1.2025776401  
AATTA AGC 0.986194104856  
AATTA AGG 2.04934536784  
AATTA AGT 1.19581039813  
AATTA ATA 2.47755271577  
AATTA ATC 1.2637432485  
AATTA ATG 0.673005721774  
AATTA ATT 1.70718984995  
AATTACAA 1.92297966156  
AATTACAC 1.89269038833  
AATTACAG 0.917554698379  
AATTACAT 1.45864073324  
AATTACCA 1.88878684281  
AATTACCC 2.13487279752  
AATTACCG 1.71749507689  
AATTACCT 1.07617133911  
AATTACGA 2.07682278094  
AATTACGC 1.01791460178  
AATTACGG 3.38828458866  
AATTACGT 2.2027413209  
AATTA CTA 2.89544671783  
AATTA CTC 2.11445907185  
AATTA CTG 0.419320021299  
AATTAGAA 1.38578738786  
AATTAGAC -0.0779818102023  
AATTAGAG 0.151572522029  
AATTAGAT 2.14788079932  
AATTAGCA 0.466254998556  
AATTAGCC 0.40021406977  
AATTAGCG 0.724978606427  
AATTAGCT 0.233863824834  
AATTAGGA 0.471816057244  
AATTAGGC 1.52906318421  
AATTAGGG 0.717514592719  
AATTAGGT 0.705008508056  
AATTAGTA 1.98123161079

AATTAGTC 0.222372399702  
AATTAGTG 1.77316894987  
AATTATAA 2.90034306419  
AATTATAC 0.135365449033  
AATTATAG 1.43643397052  
AATTATAT 2.01513277218  
AATTATCA 1.10270633044  
AATTATCC 2.16784777502  
AATTATCG 2.11034276843  
AATTATCT 1.52414726912  
AATTATGA 1.06884118385  
AATTATGC 1.65191817684  
AATTATGG 0.373154053541  
AATTATGT 1.58232011071  
AATTATTA 0.76368014412  
AATTATTC 1.09813890531  
AATTATTG 0.249595419298  
AATTCAAA 1.04407549726  
AATTCAAC 0.557568527336  
AATTCAAG 0.398407709338  
AATTCAAT 1.14669683819  
AATTCACA 1.56288627885  
AATTCACC 0.9823523882  
AATTCACG 1.2777236497  
AATTCACT 0.00796988622764  
AATTCAGA 1.09809914331  
AATTCAGC 0.580446872249  
AATTCAGG 2.32095685881  
AATTCAGT 1.39036688731  
AATTCATA 2.95034720958  
AATTCATC 0.924041316417  
AATTCATG 0.495216720738  
AATTCCAA 1.19254283637  
AATTCAC 0.515668959337  
AATTCAG 0.510531126506  
AATTCAT 1.5608804839  
AATTCACA 1.47472914478  
AATTCACC 2.41037971507  
AATTCACG 1.87406262164  
AATTCACT 1.5507688625  
AATTCAGA 0.0798714418314  
AATTCAGC 1.4927719313  
AATTCAGG 1.10453746406  
AATTCAGT 1.93720696186  
AATTCATA 2.72791464644  
AATTCATC 1.32697231715  
AATTCATG 0.843697935079  
AATTCCAA 0.465500353337  
AATTCAC 0.180811537295  
AATTCAG 0.0342421569364  
AATTCAT 1.4468428701  
AATTCACA 2.04013182629  
AATTCACC 0.891063008068  
AATTCACG 2.23937752474

AATTCGCT 0.993259874066  
AATTCGGA 1.21854614112  
AATTCGGC 1.93391504328  
AATTCGGG 1.2782665779  
AATTCGGT 1.09479181956  
AATTCGTA 2.94636309918  
AATTCGTC 0.23329008629  
AATTCGTG 0.131183985895  
AATTCTAA 1.09706720501  
AATTCTAC 1.49747862751  
AATTCTAG 1.7634457886  
AATTCTAT 2.06226655942  
AATTCTCA 2.61480467377  
AATTCTCC 1.41097380216  
AATTCTCG -0.0127454893533  
AATTCTCT 2.06417534342  
AATTCTGA 1.3140821441  
AATTCTGC 1.78047828733  
AATTCTGG 1.81213279183  
AATTCTGT 1.7562644806  
AATTCTTA 2.17791318092  
AATTCTTC 1.42549754792  
AATTCTTG 1.55308047091  
AATTGAAA 2.34896512579  
AATTGAAC 0.298065501065  
AATTGAAG -0.0442698826103  
AATTGAAT 0.753777533419  
AATTGACA 0.9450073383  
AATTGACC 0.296529147488  
AATTGACG 1.26378030418  
AATTGACT -0.255863658623  
AATTGAGA 0.69133870842  
AATTGAGC -0.158821487872  
AATTGAGG 1.70039637755  
AATTGAGT 0.296703184289  
AATTGATA 2.31102697679  
AATTGATC 1.96953096678  
AATTGATG 0.040297430176  
AATTGCAA 2.20871269841  
AATTGCAC 2.07309181498  
AATTGCAG 0.724489388147  
AATTGCAT 2.66498847676  
AATTGCCA 2.14088289614  
AATTGCCC 1.2155458799  
AATTGCCG 0.509471292352  
AATTGCCT 0.19603830013  
AATTGCGA 3.54662664262  
AATTGCGC 2.6599947031  
AATTGCGG 1.83860699519  
AATTGCGT 2.75178724944  
AATTGCTA 2.30676494877  
AATTGCTC 1.34564088672  
AATTGCTG -0.244114925493  
AATTGGAA 1.25911857442



AATTGGAC 0.547268296671  
AATTGGAG 0.658677246973  
AATTGGAT 1.47646618194  
AATTGGCA -0.428786290929  
AATTGGCC -0.0897188853646  
AATTGGCG 0.483919942027  
AATTGGCT -0.223297542696  
AATTGGGA -0.540091152235  
AATTGGGC 0.0728974791152  
AATTGGGG 0.75404483396  
AATTGGGT 0.406005581494  
AATTGGTA 1.33546223201  
AATTGGTC 0.411099280591  
AATTGGTG 0.581123867077  
AATTGTAA 1.56137532299  
AATTGTAC 0.328658922344  
AATTGTAG 0.107548081271  
AATTGTAT 0.450388504754  
AATTGTCA 1.39476006747  
AATTGTCC 1.88720843727  
AATTGTCCG 1.22565604406  
AATTGTCT 0.895855057255  
AATTGTGA 0.87813244848  
AATTGTGC 0.947535035473  
AATTGTGG 2.25167897043  
AATTGTGT 0.93558561876  
AATTGTTA 2.30420165316  
AATTGTTC 0.77845536889  
AATTGTTG 1.45368463979  
AATTTAAA 3.76148756403  
AATTTAAC 0.56333214321  
AATTTAAG 1.11298116339  
AATTTAAT 1.51452528235  
AATTTACA 1.84371797306  
AATTTACC 1.5691751278  
AATTTACG 0.51747531977  
AATTTACT 1.46596693311  
AATTTAGA 2.0150805195  
AATTTAGC 1.06004129197  
AATTTAGG 2.25034538222  
AATTTAGT 1.23353162566  
AATTTATA 5.30007343411  
AATTTATC 2.40002077821  
AATTTATG 0.752725193672  
AATTTCAA 2.51021188726  
AATTTCAC 2.0640781243  
AATTTCAG 1.01585447238  
AATTTCAT 2.43821436161  
AATTTCCA 2.92435785276  
AATTTCCC 3.88717377735  
AATTTCCG 2.78081371497  
AATTTCCT 2.84360144629  
AATTTCGA 2.95550273754  
AATTTCGC 3.07929557202

AATTTCCG 4.68576266433  
AATTTCGT 3.06873699247  
AATTTCTA 0.814508466175  
AATTTCTC 1.73665140749  
AATTTCTG 0.753113653804  
AATTTGAA 2.31880554745  
AATTTGAC 0.556944409717  
AATTTGAG 1.72234479138  
AATTTGAT 2.24783371475  
AATTTGCA 1.51592902655  
AATTTGCC 0.887454034406  
AATTTGCG 1.70752335109  
AATTTGCT 0.915314078657  
AATTTGGA 2.06995936074  
AATTTGGC 1.88333257943  
AATTTGGG 0.805810789689  
AATTTGGT 1.16881574979  
AATTTGTA 2.66929692847  
AATTTGTC 0.767942380318  
AATTTGTG 0.744658088322  
AATTTTAA 1.28123644513  
AATTTTAC 0.630437486066  
AATTTTAG 3.62802319641  
AATTTTAT 2.23542360014  
AATTTTCA 3.06710633426  
AATTTTCC 2.0527141041  
AATTTTCG 2.09846038502  
AATTTTCT 1.46228572169  
AATTTTGA 1.97798257688  
AATTTTGC 1.1146969664  
AATTTTGG 1.94638573768  
AATTTTGT 2.17476594604  
AATTTTTA 2.51109039839  
AATTTTTC 2.14867603925  
AATTTTTG 1.04962968608  
ACAAAAAA 1.72867215325  
ACAAAAAC 0.534342525177  
ACAAAAAG 1.55452085444  
ACAAAAAT 2.34711150895  
ACAAAACA 1.64052792621  
ACAAAACC 1.02370611351  
ACAAAACG -0.27426700943  
ACAAAACT 0.469439705471  
ACAAAAGA 1.24150734087  
ACAAAAGC 1.133660316  
ACAAAAGG 0.30094127184  
ACAAAAGT -0.217060321892  
ACAAAATA 5.72064044157  
ACAAAATC 10.2376232156  
ACAAAATG 0.251102003423  
ACAAACAA 1.3295012634  
ACAAACAC 0.598843977716  
ACAAACAG 2.59580739115  
ACAAACAT 1.72667739174

ACAAACCA 1.18733193307  
ACAAACCC -0.166368772777  
ACAAACCG -0.222260399942  
ACAAACCT 0.601235110127  
ACAAACGA 0.425856185699  
ACAAACGC 0.529010254102  
ACAAACGG -0.515034016463  
ACAAACGT 0.199145148475  
ACAAACTA 0.939139217075  
ACAAACTC 0.152395033274  
ACAAACTG -0.498367286461  
ACAAAGAA 1.66701586932  
ACAAAGAC 0.617572918902  
ACAAAGAG 0.179600565919  
ACAAAGAT 2.70487537994  
ACAAAGCA 0.250287819298  
ACAAAGCC -0.410398969828  
ACAAAGCG -0.587941279944  
ACAAAGCT -0.599117107241  
ACAAAGGA 0.453186833316  
ACAAAGGC -0.537435425597  
ACAAAGGG -0.221392714074  
ACAAAGGT -0.64313842533  
ACAAAGTA 0.579210503157  
ACAAAGTC 0.183124394781  
ACAAAGTG -0.114575753909  
ACAAATAA 1.90513256234  
ACAAATAC 0.78174832836  
ACAAATAG 1.57806953248  
ACAAATAT 3.94782747607  
ACAAATCA 3.6462668747  
ACAAATCC 4.98972147616  
ACAAATCG 4.0034526354  
ACAAATCT 6.85159486004  
ACAAATGA 1.37740426831  
ACAAATGC -0.0418620959603  
ACAAATGG -0.172766498813  
ACAAATGT 0.182079133086  
ACAAATTA 1.02560886035  
ACAAATTC 2.87206645578  
ACAAATTG 1.57648363254  
ACAACAAA 1.19246955772  
ACAACAAC -0.623993544517  
ACAACAAG 0.253748153873  
ACAACAAT 1.6557825849  
ACAACACA 0.413148792918  
ACAACACC 0.620710785768  
ACAACACG -0.871254663996  
ACAACACT 0.340150763833  
ACAACAGA 0.027249874557  
ACAACAGC -0.132963699545  
ACAACAGG 0.338314217591  
ACAACAGT 0.846864738686  
ACAACATA 2.17409977647

ACAACATC 1.07013272011  
ACAACATG 0.625614002003  
ACAACCAA 0.37524998956  
ACAACCAC -0.365883229009  
ACAACCAG 0.413862427073  
ACAACCAT -0.0530414622833  
ACAACCCA 0.500540872871  
ACAACCCC -0.840564856307  
ACAACCCG -0.457533381601  
ACAACCCCT -0.553133919761  
ACAACCGA 0.432198744566  
ACAACCGC -0.129893906882  
ACAACCGG -0.51821122897  
ACAACCGT -0.0168865659608  
ACAACCTA -0.506908413098  
ACAACCTC -0.265348664273  
ACAACCTG -0.494162923745  
ACAACGAA 0.969942481769  
ACAACGAC 0.249015435414  
ACAACGAG 0.826916707182  
ACAACGAT 1.73747350238  
ACAACGCA 0.273818594036  
ACAACGCC 0.390438655822  
ACAACGCG 0.125451180364  
ACAACGCT -0.00292823162883  
ACAACGGA 0.829852016863  
ACAACGGC -0.367242214938  
ACAACGGG -0.55491259252  
ACAACGGT -0.0231189986711  
ACAACGTA 0.846803534357  
ACAACGTC -0.454485863983  
ACAACGTG -0.490735064936  
ACAACCTAA 1.3321705216  
ACAACCTAC 1.26413566401  
ACAACCTAG -0.554038661312  
ACAACCTAT 0.986989344784  
ACAACCTCA 0.244335177808  
ACAACCTCC 0.77635235482  
ACAACCTCG 1.65913945501  
ACAACCTCT -0.0572293789389  
ACAACCTGA 0.0578443367259  
ACAACCTGC -0.565795305205  
ACAACCTGG -0.233113967709  
ACAACCTGT 0.18198128943  
ACAACCTTA 0.593345788782  
ACAACCTTC 1.29957442805  
ACAACCTTG 0.882991114624  
ACAAGAAA 0.234533533433  
ACAAGAAC 0.803260609293  
ACAAGAAG 0.0436545084674  
ACAAGAAT 2.34667204521  
ACAAGACA 0.169341970852  
ACAAGACC 0.0778367101422  
ACAAGACG -0.780914159148

ACAAGACT 0.686858718042  
ACAAGAGA 2.89361995596  
ACAAGAGC 0.358594292992  
ACAAGAGG 0.138106736825  
ACAAGAGT 0.629992401521  
ACAAGATA 3.9674744822  
ACAAGATC 3.71566051004  
ACAAGATG -0.38897225005  
ACAAGCAA 0.832570613254  
ACAAGCAC 0.560551717955  
ACAAGCAG 0.597780396358  
ACAAGCAT -0.417164546374  
ACAAGCCA -0.894179016245  
ACAAGCCC -0.0534399149591  
ACAAGCCG -1.20891665994  
ACAAGCCT -0.518683168477  
ACAAGCGA 0.916899978596  
ACAAGCGC -0.792978906469  
ACAAGCGG -0.234371779134  
ACAAGCGT -1.16537873115  
ACAAGCTA 0.514094301009  
ACAAGCTC -0.0434051112335  
ACAAGCTG -0.772788347605  
ACAAGGAA 0.427150844628  
ACAAGGAC -0.619602654319  
ACAAGGAG -1.07402731397  
ACAAGGAT 2.30598782033  
ACAAGGCA 0.112787296784  
ACAAGGCC -0.973456526266  
ACAAGGCG -0.795901933648  
ACAAGGCT -0.568599046395  
ACAAGGGA 0.293792439611  
ACAAGGGC -1.05976129257  
ACAAGGGG -0.219897371561  
ACAAGGGT 0.0968129667819  
ACAAGGTA 0.284361143883  
ACAAGGTC 0.316045834194  
ACAAGGTG -1.06728109798  
ACAAGTAA 1.44802365567  
ACAAGTAC 0.48242293409  
ACAAGTAG 0.286944632758  
ACAAGTAT 1.83829785088  
ACAAGTCA 0.301468586693  
ACAAGTCC -0.221909828205  
ACAAGTCG 0.003538193144  
ACAAGTCT 0.731269745331  
ACAAGTGA 1.00985228453  
ACAAGTGC -0.767110501064  
ACAAGTGG -0.569735281873  
ACAAGTGT -0.862721239945  
ACAAGTTA 1.47443811195  
ACAAGTTC -0.652161275838  
ACAAGTTG -0.201102437952  
ACAATAAA 2.15765829505

ACAATAAC 0.639170760989  
ACAATAAG 1.33754359556  
ACAATAAT 2.06548790566  
ACAATACA 1.06815419648  
ACAATACC 1.21093099019  
ACAATACG 0.469833370053  
ACAATACT 0.751058312493  
ACAATAGA 0.350202429975  
ACAATAGC 0.722693228436  
ACAATAGG -0.19583095485  
ACAATAGT 1.04553815583  
ACAATATA 2.86486308092  
ACAATATC 4.93186152608  
ACAATATG 0.920163584969  
ACAATCAA 1.99776573141  
ACAATCAC 1.23287919583  
ACAATCAG 2.76405538666  
ACAATCAT 2.73230699388  
ACAATCCA 3.07639606896  
ACAATCCC 3.39771276172  
ACAATCCG 5.66016515139  
ACAATCCT 4.02546412716  
ACAATCGA 1.97045423617  
ACAATCGC 2.08108085358  
ACAATCGG 0.762576592587  
ACAATCGT 1.71358466149  
ACAATCTA 6.61527037135  
ACAATCTC 6.44472783802  
ACAATCTG 6.58089352325  
ACAATGAA -0.186287243006  
ACAATGAC 0.784237720783  
ACAATGAG -0.085482671415  
ACAATGAT 1.33963037175  
ACAATGCA 0.750367786096  
ACAATGCC -0.227554366267  
ACAATGCG 0.501484543707  
ACAATGCT 0.32748396576  
ACAATGGA 1.34805741685  
ACAATGGC -0.147539489799  
ACAATGGG -0.191298919975  
ACAATGGT 0.396678166584  
ACAATGTA 1.64416937564  
ACAATGTC 1.02488023738  
ACAATGTG 0.252078150025  
ACAATTAA 0.730105197646  
ACAATTAC 2.25437570814  
ACAATTAG 1.23363925368  
ACAATTAT 1.14361871841  
ACAATTCA 2.03331233164  
ACAATTCC 1.53796529148  
ACAATTCG 0.115450726007  
ACAATTCT 1.09068696592  
ACAATTGA 2.26893401144  
ACAATTGC 0.777653259089

ACAATTGG 0.433941610711  
ACAATTGT -0.0309795914532  
ACAATTTA 2.68652636359  
ACAATTTT 1.33970489947  
ACAATTTG 0.966310608529  
ACACAAAA 1.24032946979  
ACACAAAC 0.209655222555  
ACACAAAG -0.349808349038  
ACACAAAT 2.48343957302  
ACACAACA 0.733752892414  
ACACAACC 0.029978047136  
ACACAACG 0.388248206995  
ACACAACT 0.800741655595  
ACACAAGA 0.802513666659  
ACACAAGC -0.315629061855  
ACACAAGG -0.526612251818  
ACACAAGT 0.808423215305  
ACACAATA 1.75166166521  
ACACAATC 6.09989265302  
ACACAATG 0.663178263328  
ACACACAA 1.12872399947  
ACACACAC -0.614790411867  
ACACACAG 1.34406039941  
ACACACAT 1.72552783287  
ACACACCA -0.162604081978  
ACACACCC -0.274942338834  
ACACACCG -0.632832573859  
ACACACCT -0.824946718848  
ACACACGA -0.342427398348  
ACACACGC 0.577991204661  
ACACACGG -0.263771091453  
ACACACGT 0.392643677108  
ACACACTA 0.540830392283  
ACACACTC 0.157833475124  
ACACACTG -1.39117024618  
ACACAGAA 0.693360116718  
ACACAGAC 0.256249204263  
ACACAGAG -0.308461493606  
ACACAGAT 2.21717492558  
ACACAGCA 0.636667004285  
ACACAGCC -0.57600851747  
ACACAGCG -0.157498724914  
ACACAGCT -0.254069997048  
ACACAGGA 0.113417451564  
ACACAGGC 0.228379583825  
ACACAGGG 0.320717348323  
ACACAGGT -0.0375623877233  
ACACAGTA 0.937858922427  
ACACAGTC -0.194349143906  
ACACAGTG -1.01622877641  
ACACATAA 1.44341313769  
ACACATAC 1.37096115948  
ACACATAG 0.757142522474  
ACACATAT 1.97965153984

ACACATCA 0.467540705832  
ACACATCC 1.15434321582  
ACACATCG 1.26588789817  
ACACATCT 0.294871842497  
ACACATGA 2.06142156495  
ACACATGC -0.540231256024  
ACACATGG -0.48003596524  
ACACATGT -0.909811101629  
ACACATTA 2.21986229528  
ACACATTC 1.55419068414  
ACACATTG -0.181375075118  
ACACAAA 0.610677231111  
ACACCAAC -0.888559459541  
ACACCAAG -0.918214830791  
ACACCAAT 0.37722768048  
ACACCACA 1.12307217518  
ACACCACC -0.002825808057  
ACACCACG -0.702499130546  
ACACCACT -0.150568479576  
ACACCAGA -0.0531682426802  
ACACCAGC -0.18364692154  
ACACCAGG -1.16404597565  
ACACCAGT -0.549009497392  
ACACCATA 1.04536016365  
ACACCATC 0.462098516778  
ACACCATG -0.555718657703  
ACACCCAA -0.267860956275  
ACACCCAC -0.503489089587  
ACACCCAG 0.49801296752  
ACACCCAT 1.0799512269  
ACACCCCA -0.776797855722  
ACACCCCC -0.242974110099  
ACACCCCG -0.513276369681  
ACACCCCT -0.617789632191  
ACACCCGA -0.295002994632  
ACACCCGC -0.483387630903  
ACACCCGG -1.3668538077  
ACACCCGT -0.532472878635  
ACACCCTA -0.0838824071942  
ACACCCTC 0.390022716195  
ACACCCTG -0.704246160251  
ACACCGAA 1.29495933015  
ACACCGAC -1.12066667848  
ACACCGAG -0.908230197961  
ACACCGAT 2.06048413945  
ACACCGCA 0.377287219385  
ACACCGCC 0.364496763586  
ACACCGCG -0.294176736184  
ACACCGCT -0.0610877498339  
ACACCGGA 0.386977488535  
ACACCGGC -0.515701643282  
ACACCGGG -0.277344712857  
ACACCGGT -0.835157432977  
ACACCGTA 0.423530629355



ACACCGTC -0.416147388708  
ACACCGTG -0.72190923012  
ACACCTAA -0.277773559519  
ACACCTAC 0.76027934845  
ACACCTAG -1.34440639123  
ACACCTAT 0.131118826184  
ACACCTCA 1.75952433977  
ACACCTCC 0.0867771221663  
ACACCTCG 0.708598537519  
ACACCTCT 0.0206866470181  
ACACCTGA 0.861485703565  
ACACCTGC -0.571984020537  
ACACCTGG -0.90465328371  
ACACCTGT -1.50704128355  
ACACCTTA -0.0677340403914  
ACACCTTC 0.0850719362377  
ACACCTTG -0.682787172884  
ACACGAAA 1.59847513921  
ACACGAAC -0.732711169744  
ACACGAAG 0.812748529435  
ACACGAAT 2.30826216489  
ACACGACA 0.147696456005  
ACACGACC -0.317260344596  
ACACGACG -0.801104718013  
ACACGACT -1.10483078685  
ACACGAGA 2.81791290667  
ACACGAGC -0.80199738524  
ACACGAGG 0.145052387335  
ACACGAGT -0.501135637393  
ACACGATA 2.66159600821  
ACACGATC 4.15867181131  
ACACGATG 0.418626580409  
ACACGCAA 0.745984598484  
ACACGCAC -0.388741172479  
ACACGCAG -0.336546578265  
ACACGCAT 1.46769314502  
ACACGCCA -0.841838072903  
ACACGCCC -0.392841862556  
ACACGCCG 0.0433847097903  
ACACGCCT -0.373472982224  
ACACGCGA 0.414295229117  
ACACGCGC -0.755371760478  
ACACGCGG -0.714467699635  
ACACGCGT 0.247009432287  
ACACGCTA 0.323113477006  
ACACGCTC 0.0136281640374  
ACACGCTG -0.583953422338  
ACACGGAA 0.169689628098  
ACACGGAC -0.341990640922  
ACACGGAG -0.64569443471  
ACACGGAT 1.14753225647  
ACACGGCA -0.926622098978  
ACACGGCC 0.312701662938  
ACACGGCG -0.424964143005

ACACGGCT -0.941766006972  
ACACGGGA 0.0680392293269  
ACACGGGC -0.797038169126  
ACACGGGG -0.114275977601  
ACACGGGT -0.786508734493  
ACACGGTA 0.102494976883  
ACACGGTC -1.07921885673  
ACACGGTG -0.855721879514  
ACACGTAA 1.92518031111  
ACACGTAC 0.390770075184  
ACACGTAG -0.100032855777  
ACACGTAT 2.19866311404  
ACACGTCA 0.248216031926  
ACACGTCC -0.300902134378  
ACACGTCCG -0.0322043025773  
ACACGTCT -0.476159691037  
ACACGTGA 0.386973324975  
ACACGTGC -0.77589935951  
ACACGTGG -0.126264531777  
ACACGTGT -0.564213360648  
ACACGTTA -0.253076363494  
ACACGTTC -0.497777310033  
ACACGTTG -0.825673468217  
ACACTAAA 1.54318015017  
ACACTAAC -0.282561653324  
ACACTAAG 0.159295092803  
ACACTAAT 1.94838362186  
ACACTACA 0.38227849491  
ACACTACC 0.182888529117  
ACACTACG -0.788475391979  
ACACTACT 0.243177291819  
ACACTAGA 0.00963260384597  
ACACTAGC 0.0501731859161  
ACACTAGG 0.187409738737  
ACACTAGT 0.583685497263  
ACACTATA 1.55049240212  
ACACTATC 0.591884379282  
ACACTATG -0.0269421874855  
ACACTCAA 0.0360481010129  
ACACTCAC 0.0614945296293  
ACACTCAG -0.102285758001  
ACACTCAT 0.437899490686  
ACACTCCA -0.324336939062  
ACACTCCC 0.30379372668  
ACACTCCG 0.487277644853  
ACACTCCT 0.429203479624  
ACACTCGA -0.445819414196  
ACACTCGC 0.157328851673  
ACACTCGG -0.379202873263  
ACACTCGT -0.980629923498  
ACACTCTA 2.12591219223  
ACACTCTC 0.117468387101  
ACACTCTG -0.289970499865  
ACACTGAA 1.54641273802

ACACTGAC 0.245266566142  
ACACTGAG -0.394843493945  
ACACTGAT 2.42550634429  
ACACTGCA -0.46681020926  
ACACTGCC -0.300126046825  
ACACTGCG -0.87591431198  
ACACTGCT 0.0954995718334  
ACACTGGA -0.664009101692  
ACACTGGC -0.768763850673  
ACACTGGG 0.0657894497725  
ACACTGGT -0.740543658497  
ACACTGTA 0.50001855429  
ACACTGTC -0.21825255725  
ACACTGTG -0.432096529173  
ACACTTAA 1.36255035226  
ACACTTAC 1.00046866156  
ACACTTAG -0.550936392882  
ACACTTAT 0.908148800366  
ACACTTCA 0.275453415804  
ACACTTCC 1.2058135588  
ACACTTCG 0.502365969323  
ACACTTCT 0.178218264055  
ACACTTGA -0.037963130357  
ACACTTGC -0.270914719232  
ACACTTGG -0.0663534039516  
ACACTTTA 1.057976999  
ACACTTTC -0.834565582947  
ACACTTTG 0.0108775082353  
ACAGAAAA 1.2033589321  
ACAGAAAC 0.0977949423679  
ACAGAAAG 0.251598507932  
ACAGAAAT 2.24970606761  
ACAGAACA -0.0805328233105  
ACAGAACC -0.771404380317  
ACAGAACG -0.562169260949  
ACAGAACT 0.906361592309  
ACAGAAGA 1.88333257943  
ACAGAAGC -0.0697754337763  
ACAGAAGG -0.978159683451  
ACAGAAGT -0.42616491366  
ACAGAATA 2.43663075162  
ACAGAATC 11.5342286092  
ACAGAATG -0.0771322358189  
ACAGACAA 1.49907785084  
ACAGACAC 0.101218637617  
ACAGACAG 0.347954524023  
ACAGACAT 0.180559017392  
ACAGACCA -0.320806032148  
ACAGACCC -1.05974526286  
ACAGACCG 0.145479984929  
ACAGACCT -0.869911291416  
ACAGACGA -0.586890189265  
ACAGACGC 0.461949877692  
ACAGACGG -0.762946524878

ACAGACGT 0.649451631101  
ACAGACTA 1.0973586542  
ACAGACTC -1.28218573677  
ACAGACTG -0.390847517397  
ACAGAGAA 2.59663698045  
ACAGAGAC 0.38227849491  
ACAGAGAG -0.238452067767  
ACAGAGAT 2.84360144629  
ACAGAGCA -1.50524616473  
ACAGAGCC -1.41053100757  
ACAGAGCG -0.95380202573  
ACAGAGCT -0.618657942594  
ACAGAGGA 0.0564295590954  
ACAGAGGC -0.657676535368  
ACAGAGGG -1.45220969872  
ACAGAGGT -0.905632552983  
ACAGAGTA 0.268453430838  
ACAGAGTC -0.626557881016  
ACAGAGTG -1.06652083195  
ACAGATAA 2.44277221055  
ACAGATAC 2.84542758363  
ACAGATAG -0.105688635451  
ACAGATAT 7.58003380104  
ACAGATCA 1.38090415671  
ACAGATCC 2.3006740771  
ACAGATCG 4.05641082649  
ACAGATCT 5.72273263039  
ACAGATGA 0.278504680625  
ACAGATGC -0.378470919445  
ACAGATGG -0.745240153986  
ACAGATGT -0.6036757889  
ACAGATTA 2.69626763634  
ACAGATTC 6.88050495408  
ACAGATTG 4.85096772214  
ACAGCAAA 1.32623744884  
ACAGCAAC 0.440982606741  
ACAGCAAG 0.428991554429  
ACAGCAAT 1.02946223497  
ACAGCACA -0.345605235389  
ACAGCACC -0.848951514873  
ACAGCACG -0.552491482479  
ACAGCACT 0.526948042918  
ACAGCAGA 0.272151088324  
ACAGCAGC -0.0430012459299  
ACAGCAGG -0.858174424432  
ACAGCAGT -0.859547150108  
ACAGCATA 3.06850695579  
ACAGCATC 1.2134299588  
ACAGCATG -0.44371390199  
ACAGCCAA 0.84029922119  
ACAGCCAC -1.19572941689  
ACAGCCAG -0.750061139914  
ACAGCCAT -0.723335665718  
ACAGCCCA -0.929307595069

ACAGCCCC -1.15872744432  
ACAGCCCG -0.49290823499  
ACAGCCCT -0.975283912676  
ACAGCCGA 0.118906897023  
ACAGCCGC -0.727843551946  
ACAGCCGG -0.546039630165  
ACAGCCGT -1.05544118289  
ACAGCCTA -0.788464983079  
ACAGCCTC -0.681404038308  
ACAGCCTG -1.05826990544  
ACAGCGAA 0.419320021299  
ACAGCGAC -0.921621455444  
ACAGCGAG -0.0514137185676  
ACAGCGAT 1.14193830566  
ACAGCGCA -0.748852458495  
ACAGCGCC -0.584168470204  
ACAGCGCG 0.866097054256  
ACAGCGCT 0.290178053322  
ACAGCGGA -0.345088329436  
ACAGCGGC -0.605428855766  
ACAGCGGG -0.331312567202  
ACAGCGGT -1.13768314751  
ACAGCGTA -0.525079853622  
ACAGCGTC -1.3162103477  
ACAGCGTG -1.02450801513  
ACAGCTAA 0.296482515618  
ACAGCTAC -0.23042514077  
ACAGCTAG -0.359877293954  
ACAGCTAT 0.724374057539  
ACAGCTCA -0.491121859644  
ACAGCTCC -0.124393427989  
ACAGCTCG 1.19813345633  
ACAGCTCT 0.234778767107  
ACAGCTGA -0.540091152235  
ACAGCTGC -0.950301720981  
ACAGCTGG -0.457526928084  
ACAGCTGT -1.41536385965  
ACAGCTTA -0.240712880755  
ACAGCTTC -0.254002963735  
ACAGCTTG -0.564287680191  
ACAGGAAA 1.6577954579  
ACAGGAAC -0.292872292889  
ACAGGAAG -0.698539585147  
ACAGGAAT 3.2465411905  
ACAGGACA -0.930581852555  
ACAGGACC -0.130122694494  
ACAGGACG 0.0325475880854  
ACAGGACT -0.269266574073  
ACAGGAGA 1.46906191531  
ACAGGAGC 0.0334737719697  
ACAGGAGG 0.388890227921  
ACAGGAGT 0.106945197808  
ACAGGATA 3.04196655183  
ACAGGATC 3.81116403726

ACAGGATG -0.346874080247  
ACAGGCAA 1.97943357748  
ACAGGCAC -0.97871322873  
ACAGGCAG -0.221610676431  
ACAGGCAT 0.740034663308  
ACAGGCCA -0.750135667635  
ACAGGCCC -0.417987682153  
ACAGGCCG -0.662447766756  
ACAGGCCT 0.183231190091  
ACAGGCCG -0.856767557565  
ACAGGCCG -0.848666727381  
ACAGGCCG -0.369038999183  
ACAGGCCG -1.20523732212  
ACAGGCTA -0.109799526249  
ACAGGCTC -0.955917738658  
ACAGGCTG -0.603482599723  
ACAGGGAA 0.545138219462  
ACAGGGAC -1.16179473885  
ACAGGGAG -0.995152628365  
ACAGGGAT 0.533923671058  
ACAGGGCA -0.601835495455  
ACAGGGCC -0.790590896729  
ACAGGGCG -0.346311166958  
ACAGGGCT -1.07387742582  
ACAGGGGA 0.55768011074  
ACAGGGGC -1.01926317881  
ACAGGGGG -1.04083583136  
ACAGGGGT -0.329952540384  
ACAGGGTA 0.216605036625  
ACAGGGTC -0.765566028545  
ACAGGGTG -0.654869046974  
ACAGGTAA 0.54794945506  
ACAGGTAC -0.0139142005977  
ACAGGTAG 0.047595734203  
ACAGGTAT 1.17784318021  
ACAGGTCA -0.944633450627  
ACAGGTCC -1.12250197566  
ACAGGTCC -0.851017889617  
ACAGGTCT -0.464139493806  
ACAGGTGA 0.0162258090156  
ACAGGTGC -1.44537604797  
ACAGGTGG -1.6021765439  
ACAGGTGA 0.303372166247  
ACAGGTTC -0.366370781865  
ACAGGTTG -0.389437319683  
ACAGTAAA 1.30354937862  
ACAGTAAC 0.22787537673  
ACAGTAAG 0.094944152952  
ACAGTAAT 1.92854946372  
ACAGTACA 0.00580691689567  
ACAGTACC 0.2808062965  
ACAGTACG 0.000329337582597  
ACAGTACT 0.888925644629  
ACAGTAGA 0.365801623237

ACAGTAGC -0.267595112979  
ACAGTAGG -0.281517016163  
ACAGTAGT 0.589378540797  
ACAGTATA 1.97357107706  
ACAGTATC 3.967391211  
ACAGTATG 0.818512561664  
ACAGTCAA 1.42470896969  
ACAGTCAC -0.264630450202  
ACAGTCAG -0.899469235365  
ACAGTCAT 0.929204963319  
ACAGTCCA -0.822300984754  
ACAGTCCC -0.391580928461  
ACAGTCCG 0.00648890799591  
ACAGTCCT -0.419215099591  
ACAGTCGA 0.342664096724  
ACAGTCGC -0.609979418483  
ACAGTCGG -0.161416218359  
ACAGTCGT -0.520826777255  
ACAGTCTA 0.881553021059  
ACAGTCTC 0.0255009712502  
ACAGTCTG -0.0974685192772  
ACAGTGAA -0.560597517113  
ACAGTGAC -0.835388510547  
ACAGTGAG -1.40546457979  
ACAGTGAT 2.18436669865  
ACAGTGCA -0.0810536846453  
ACAGTGCC -0.883531961046  
ACAGTGCG 2.65806197863  
ACAGTGCT -0.353760191851  
ACAGTGGA -0.100402163534  
ACAGTGGC -0.387426320285  
ACAGTGGG -0.758492348571  
ACAGTGGT -0.0291769782246  
ACAGTGTA -0.18807382653  
ACAGTGTC -0.797571937496  
ACAGTGTG -0.39234598258  
ACAGTTAA 1.12120086321  
ACAGTTAC 0.567494870328  
ACAGTTAG 0.0397520038382  
ACAGTTAT 1.06863800213  
ACAGTTCA -0.220085772643  
ACAGTTCC -0.278824233842  
ACAGTTCG 0.0953969400835  
ACAGTTCT -0.10034137556  
ACAGTTGA 0.09504178843  
ACAGTTGC -0.38709719088  
ACAGTTGG -0.432825360321  
ACAGTTTA 0.184948658521  
ACAGTTTC -0.0972416052665  
ACAGTTTG -0.0433480704638  
ACATAAAA 1.82645543765  
ACATAAAC 0.418843710054  
ACATAAAG 0.339482720658  
ACATAAAT 1.97518445649

ACATAACA 0.113006091853  
ACATAACC 0.375251863162  
ACATAACG -0.0263553337274  
ACATAACT 1.64121866079  
ACATAAGA 0.411894104163  
ACATAAGC 0.0720195925249  
ACATAAGG -0.571835381451  
ACATAAGT 0.406115707652  
ACATAATA 0.708048323088  
ACATAATC 4.39361254089  
ACATAATG 0.536497583746  
ACATACAA 1.2287922455  
ACATACAC 1.57415870073  
ACATACAG 0.528161720609  
ACATACAT 0.904020214438  
ACATACCA -0.91975618064  
ACATACCC -0.0490138426812  
ACATACCG -0.11307270881  
ACATACCT 1.39119189669  
ACATACGA 0.0288988524279  
ACATACGC 0.623115866104  
ACATACGG 0.505153888985  
ACATACGT -0.0381944161056  
ACATACTA 0.579459275857  
ACATACTC -0.285404115621  
ACATACTG 0.866419105609  
ACATAGAA 0.635184152451  
ACATAGAC 1.53428387188  
ACATAGAG 0.0939723780875  
ACATAGAT 3.32503033047  
ACATAGCA 0.26379107654  
ACATAGCC -0.593459453965  
ACATAGCG -0.448269669156  
ACATAGCT 0.49290303054  
ACATAGGA 1.73558178897  
ACATAGGC -0.19524847283  
ACATAGGG -0.346194587283  
ACATAGGT 0.194358720094  
ACATAGTA 1.51320022943  
ACATAGTC 0.487063637877  
ACATAGTG -0.0273878965654  
ACATATAA 2.09972069459  
ACATATAC 0.623335702064  
ACATATAG 0.286566789703  
ACATATAT 3.30631700263  
ACATATCA 2.35994172675  
ACATATCC 1.94550202211  
ACATATCG 2.74042885004  
ACATATCT 4.79536504602  
ACATATGA 0.844790245001  
ACATATGC -0.219359855986  
ACATATGG 0.125960383732  
ACATATGT -0.650978200313  
ACATATTA 1.84908584258



ACATATTC 1.00595685795  
ACATATTG 0.81861040532  
ACATCAAA 0.676575141617  
ACATCAAC -0.491188476602  
ACATCAAG 0.352799658598  
ACATCAAT 0.0775063316696  
ACATCACA -0.0367725604234  
ACATCACC -0.0954125534329  
ACATCACG 0.116059646633  
ACATCACT 0.922838255804  
ACATCAGA 1.02478738999  
ACATCAGC 1.01118753816  
ACATCAGG 0.275342040578  
ACATCAGT 0.1962258685  
ACATCATA 1.69216439523  
ACATCATC -0.231133154119  
ACATCATG 0.436608370783  
ACATCCAA 1.40565152363  
ACATCCAC 0.808300182112  
ACATCCAG 1.06716993093  
ACATCCAT 0.472580070473  
ACATCCCA -0.191429239397  
ACATCCCC -0.507044353326  
ACATCCCG 0.0118218036049  
ACATCCCT 0.382506241633  
ACATCCGA 1.05450771278  
ACATCCGC 1.29745434338  
ACATCCGG 0.338953115847  
ACATCCGT 0.563321942488  
ACATCCTA 0.991876739491  
ACATCCTC -0.398869448123  
ACATCCTG -0.00396995429843  
ACATCGAA 0.304439078454  
ACATCGAC -0.111449336832  
ACATCGAG 0.0258783979488  
ACATCGAT 4.13318957608  
ACATCGCA -0.556510983139  
ACATCGCC -0.606131456488  
ACATCGCG -0.0805328233105  
ACATCGCT 0.42021435395  
ACATCGGA 0.936076086108  
ACATCGGC -0.295299856448  
ACATCGGG -0.121446876697  
ACATCGGT -0.438361645828  
ACATCGTA 0.899751941078  
ACATCGTC 0.291350303593  
ACATCGTG -0.474975158265  
ACATCTAA 1.86746233842  
ACATCTAC 0.743909063908  
ACATCTAG 1.62241852273  
ACATCTAT 0.803090111518  
ACATCTCA 1.44649646192  
ACATCTCC 1.31249353784  
ACATCTCG 1.16177870914

ACATCTCT 1.22149519054  
ACATCTGA 0.382506241633  
ACATCTGC 0.00903034491648  
ACATCTGG 0.512414720974  
ACATCTTA 0.942068281416  
ACATCTTC 2.06663455004  
ACATCTTG 0.413507275419  
ACATGAAA 2.10341543758  
ACATGAAC -0.514747979903  
ACATGAAG 0.234184418941  
ACATGAAT 0.837217354203  
ACATGACA -0.44248148828  
ACATGACC -0.944183786166  
ACATGACG -0.170901432187  
ACATGACT 1.01903335031  
ACATGAGA 1.35755074962  
ACATGAGC 0.326327537017  
ACATGAGG -0.433355797843  
ACATGAGT 0.227720492304  
ACATGATA 1.16640421593  
ACATGATC 0.831322586195  
ACATGATG 0.235362290017  
ACATGCAA 1.93783066312  
ACATGCAC 0.582176623181  
ACATGCAG 0.570038180851  
ACATGCAT 0.826223266292  
ACATGCCA -0.836259319086  
ACATGCCC 0.162228945238  
ACATGCCG -0.202937735125  
ACATGCCT 0.787196762755  
ACATGCGA 0.163291277528  
ACATGCGC -0.711207215931  
ACATGCGG -0.287694698061  
ACATGCGT -1.00826388645  
ACATGCTA 0.769580324756  
ACATGCTC -0.545886202986  
ACATGCTG -0.0582323805021  
ACATGGAA 0.762544949532  
ACATGGAC 0.186524774095  
ACATGGAG -0.638767103863  
ACATGGAT 1.12843379935  
ACATGGCA -0.359296893713  
ACATGGCC -0.246223144013  
ACATGGCG -0.126904054567  
ACATGGCT -0.288339425301  
ACATGGGA -0.176353613785  
ACATGGGC -0.802163719456  
ACATGGGG -0.589443075975  
ACATGGGT -1.27221151284  
ACATGGTA 0.561061545856  
ACATGGTC -0.310672343876  
ACATGGTG -0.875635145293  
ACATGTAA 0.634536718898  
ACATGTAC 0.643700089551

ACATGTAG 0.0598948899424  
ACATGTAT 1.44354616343  
ACATGTCA -0.778468692282  
ACATGTCC 0.541617929625  
ACATGTCCG -0.778468692282  
ACATGTCT -0.149530295932  
ACATGTGA 1.98156011566  
ACATGTGC 0.191605357978  
ACATGTGG 0.0563569049764  
ACATGTTA -0.752514517544  
ACATGTTC 0.804558182714  
ACATGTTG -0.13785338421  
ACATTAAG 0.985592886816  
ACATTAAC 0.908387580522  
ACATTAAG 0.294230446105  
ACATTAAT 1.80416457103  
ACATTACA 1.44451710558  
ACATTACC 0.464753618881  
ACATTACG 1.29484608132  
ACATTACT 1.21027793583  
ACATTAGA 1.64584250216  
ACATTAGC 0.606842592507  
ACATTAGG -0.107583887886  
ACATTAGT 0.873051031885  
ACATTATA 2.87578784556  
ACATTATC 0.796595790894  
ACATTATG 1.63128857059  
ACATTCAG 0.398752452092  
ACATTCAC 0.0630133962555  
ACATTCAG 1.43657802969  
ACATTCAT 0.541348130948  
ACATTCAC -0.090986481155  
ACATTCAC 0.390747591961  
ACATTCAG 0.406522071091  
ACATTCCT 1.5366058892  
ACATTCGA -0.30335218116  
ACATTCGC 0.214490780943  
ACATTCGG -0.224534119966  
ACATTCGT 0.630523671755  
ACATTCTA 0.719875747499  
ACATTCTC 1.04892687718  
ACATTCTG 0.675377909987  
ACATTGAA 0.262667331742  
ACATTGAC -0.555958062394  
ACATTGAG -0.226313209082  
ACATTGAT 0.321396424932  
ACATTGCA 0.149143501224  
ACATTGCC -0.139692012231  
ACATTGCG 1.21104590444  
ACATTGCT 0.279284515382  
ACATTGGA 0.443741797841  
ACATTGGC -1.09147179695  
ACATTGGG -0.596522584933  
ACATTGGT -0.270511270285

ACATTGTA -0.0252773880873  
ACATTGTC 0.338139348078  
ACATTGTG 0.376128500684  
ACATTTAA 0.40755047037  
ACATTTAC 1.48619184135  
ACATTTAG 1.04459802402  
ACATTTAT 1.57536405131  
ACATTTCA 1.73095274315  
ACATTTCC 0.487361332405  
ACATTTTCG 1.4479666149  
ACATTTCT 1.53919354163  
ACATTTGA 1.41556995586  
ACATTTGC -0.272409229033  
ACATTTGG -0.185231988767  
ACATTTTA 1.15617663939  
ACATTTTC 1.24120964634  
ACATTTTG -0.328967025772  
ACCAAAAA 0.833892335322  
ACCAAAAC 0.832096383789  
ACCAAAAG -0.925666770175  
ACCAAAAT 2.05404581871  
ACCAAACA -0.403416471814  
ACCAAACC -0.0214090246487  
ACCAAACG -0.107061777483  
ACCAAACCT -0.784726522707  
ACCAAAGA 1.29696096154  
ACCAAAGC 0.0584289005261  
ACCAAAGG -0.777459237201  
ACCAAAGT -0.901833720993  
ACCAAATA 1.38456559122  
ACCAAATC 7.04378457364  
ACCAAATG 0.656937503498  
ACCAACAA 0.993054194211  
ACCAACAC -0.26467416758  
ACCAACAG -0.390847517397  
ACCAACAT 0.575045069725  
ACCAACCA 0.617115135499  
ACCAACCC -0.99951999445  
ACCAACCG 0.0645226866941  
ACCAACCT -0.349809806283  
ACCAACGA 0.906179852922  
ACCAACGC -0.671393591408  
ACCAACGG -1.25075856263  
ACCAACGT -1.08649884109  
ACCAACTA 0.0355101690828  
ACCAACTC 0.0916162195794  
ACCAACTG 0.876553418414  
ACCAAGAA 1.73376793413  
ACCAAGAC -0.0872563479028  
ACCAAGAG -0.513371507023  
ACCAAGAT 4.53754826148  
ACCAAGCA -0.282272702272  
ACCAAGCC -1.37943046471  
ACCAAGCG -0.832944292749

ACCAAGCT 0.195004696402  
ACCAAGGA -0.790078362513  
ACCAAGGC 0.199592522979  
ACCAAGGG -0.233992478833  
ACCAAGGT -0.250209960729  
ACCAAGTA -0.196686150039  
ACCAAGTC -1.12051304313  
ACCAAGTG 0.235239256824  
ACCAATAA 1.46491771604  
ACCAATAC 0.874049037176  
ACCAATAG 0.30561278597  
ACCAATAT 2.63877387136  
ACCAATCA 0.433464466755  
ACCAATCC 1.32349616105  
ACCAATCG 1.55772721186  
ACCAATCT 1.77531984488  
ACCAATGA 0.290284432276  
ACCAATGC -0.668927931276  
ACCAATGG -0.729471712018  
ACCAATTA 1.24602626053  
ACCAATTC 0.534081678154  
ACCAATTG 1.47375570449  
ACCACAAA -0.0547491463478  
ACCACAAC -0.132949127085  
ACCACAAG -1.1551076454  
ACCACAAT 2.78401465977  
ACCACACA 0.187162006927  
ACCACACC -0.891182502235  
ACCACACG -0.774577429264  
ACCACACT -0.217653004634  
ACCACAGA 0.299735921269  
ACCACAGC -0.506116920374  
ACCACAGG 0.481457612744  
ACCACAGT -0.192015676799  
ACCACATA 0.342739665335  
ACCACATC 1.21383278321  
ACCACATG -0.207574691708  
ACCACCAA -0.124511048555  
ACCACCAC -0.149822786011  
ACCACCAG -0.70450846452  
ACCACCAT 0.209192651058  
ACCACCCA -0.6735399065  
ACCACCCC -0.66714676038  
ACCACCCG -0.565933119036  
ACCACCCCT -0.741404890848  
ACCACCGA -0.255054678948  
ACCACCGC -0.834685077114  
ACCACCGG -0.814935231058  
ACCACCGT -0.93709053746  
ACCACCTA -0.746204850799  
ACCACCTC -1.00377057268  
ACCACCTG -1.39034544498  
ACCACGAA 0.890153270245  
ACCACGAC -0.0565238637256

ACCACGAG -0.816017340258  
ACCACGAT 1.12518081005  
ACCACGCA -0.346406096122  
ACCACGCC -0.696087664763  
ACCACGCG 0.0162287235075  
ACCACGCT -0.204819247812  
ACCACGGA -0.641102028216  
ACCACGGC -0.722210463673  
ACCACGGG -1.13455652226  
ACCACGGT -0.679655759535  
ACCACGTA -0.0867236204225  
ACCACGTC -1.02894033275  
ACCACGTG 0.361652635865  
ACCACTAA 1.68893284827  
ACCACTAC -0.364006712594  
ACCACTAG -0.801372018554  
ACCACTAT 0.860565973199  
ACCACTCA -0.142985388057  
ACCACTCC -0.67506668389  
ACCACTCG 1.52000619251  
ACCACTCT 0.546271540448  
ACCACTGA -0.130310679221  
ACCACTGC -1.04001894092  
ACCACTGG -0.863650546499  
ACCACTTA 0.115714487523  
ACCACTTC -0.667450700248  
ACCACTTG -0.202496189605  
ACCAGAAA 0.614843080899  
ACCAGAAC -0.341014286141  
ACCAGAAG -0.818398480125  
ACCAGAAT 2.45521084555  
ACCAGACA -0.899077860741  
ACCAGACC -1.05126346696  
ACCAGACG -1.01937517857  
ACCAGACT -0.811051462448  
ACCAGAGA 0.968569547915  
ACCAGAGC -0.783096697212  
ACCAGAGG 0.278585870042  
ACCAGAGT -0.307116663781  
ACCAGATA 2.50360639959  
ACCAGATC 3.2183572213  
ACCAGATG 0.491093963793  
ACCAGCAA 0.749901051039  
ACCAGCAC -0.292872292889  
ACCAGCAG -0.690214963622  
ACCAGCAT 0.489277402639  
ACCAGCCA -0.59969042943  
ACCAGCCC -1.14093030782  
ACCAGCCG -0.501939620796  
ACCAGCCT -0.0141704677053  
ACCAGCGA 0.454790636563  
ACCAGCGC -1.09329959972  
ACCAGCGG -0.609426914094  
ACCAGCGT -0.796242512843

ACCAGCTA -0.571425478986  
ACCAGCTC -0.177107842648  
ACCAGCTG -1.05127179408  
ACCAGGAA -0.183844482454  
ACCAGGAC -0.692004461637  
ACCAGGAG -0.821559454748  
ACCAGGAT 0.51746386998  
ACCAGGCA -1.57160560585  
ACCAGGCC -0.934929649908  
ACCAGGCG -1.54783334464  
ACCAGGCT -0.248514559166  
ACCAGGGA -0.489186220679  
ACCAGGGC -0.629658900378  
ACCAGGGG -1.12819689279  
ACCAGGGT -1.70369495783  
ACCAGGTA -0.321687665942  
ACCAGGTC -0.703303530305  
ACCAGGTG -0.90465328371  
ACCAGTAA 0.882283725809  
ACCAGTAC -0.0303161281942  
ACCAGTAG 0.113231756796  
ACCAGTAT 0.130453489323  
ACCAGTCA -0.726128165296  
ACCAGTCC -1.31892998499  
ACCAGTCG -0.816870037311  
ACCAGTCT 0.107917389028  
ACCAGTGA -0.800484347598  
ACCAGTGC -0.545040792162  
ACCAGTGG -0.78686346979  
ACCAGTTA 0.215115314917  
ACCAGTTC -1.26426306895  
ACCAGTTG -0.128395441699  
ACCATAAA 1.72879914183  
ACCATAAC 0.299735921269  
ACCATAAG -0.890607930978  
ACCATAAT 0.869235545656  
ACCATACA -0.00607421743679  
ACCATACC -0.527064622594  
ACCATACG -0.20384206032  
ACCATACT 1.33904955516  
ACCATAGA 0.337276033948  
ACCATAGC 0.634078727316  
ACCATAGG -0.0657671747274  
ACCATAGT 0.35111195962  
ACCATATA 1.28608137153  
ACCATATC 4.34680600946  
ACCATATG 0.458777869635  
ACCATCAA 0.681031399703  
ACCATCAC -0.302300674125  
ACCATCAG -0.591969107724  
ACCATCAT 1.39817668467  
ACCATCCA 0.82475790141  
ACCATCCC -0.855554088053  
ACCATCCG -0.690341119485

ACCATCCT -0.235413918159  
ACCATCGA -0.568366303401  
ACCATCGC -1.27476752222  
ACCATCGG -0.847215518602  
ACCATCGT -0.334687548801  
ACCATCTA 0.208648473788  
ACCATCTC -0.164937340907  
ACCATCTG 0.347534629014  
ACCATGAA 0.211026699164  
ACCATGAC -0.498331063491  
ACCATGAG -1.23938142722  
ACCATGAT 1.56407872239  
ACCATGCA -0.577973301354  
ACCATGCC -0.129906397561  
ACCATGCG 0.25818879861  
ACCATGCT 0.872694006629  
ACCATGGA -0.887731327491  
ACCATGGC -1.21962575218  
ACCATGGG -0.809795316447  
ACCATGGT -0.554841812003  
ACCATGTA 0.669940300849  
ACCATGTC -0.428143645469  
ACCATGTG -0.329990636956  
ACCATTAA 1.5786028845  
ACCATTAC 1.41994960444  
ACCATTAG 0.750435860299  
ACCATTAT 0.714944843591  
ACCATTCA 0.117390320354  
ACCATTCC 0.0806287933646  
ACCATTCT 0.207763717324  
ACCATTCT 0.400154947221  
ACCATTGA -0.044474521576  
ACCATTGC -0.177920569527  
ACCATTGG -0.502920555492  
ACCATTTA 0.0834991515118  
ACCATTTC -0.156557135858  
ACCATTTG 0.218657047087  
ACCCAAAA 0.353206022037  
ACCCAAAC 0.833674581143  
ACCCAAAG -0.700819134154  
ACCCAAAT 0.867127118958  
ACCCAACA -0.536034179536  
ACCCAACC -0.372995421912  
ACCCAACG 0.109554084397  
ACCCAACT -1.00759209607  
ACCCAAGA 0.0735222212678  
ACCCAAGC -0.546039630165  
ACCCAAGG -0.948290513405  
ACCCAAGT -0.95646170775  
ACCCAATA -0.0507408872989  
ACCCAATC 0.360436876395  
ACCCAATG -0.102767065518  
ACCCACAA -0.377094030209  
ACCCACAC 0.3805693536



ACCCACAG -1.05551196341  
ACCCACAT -0.355244917286  
ACCCACCA 0.122090146691  
ACCCACCC -0.236591372879  
ACCCACCG 0.516064081165  
ACCCACCT -0.31309220485  
ACCCACGA 0.266340216046  
ACCCACGC -0.723259888929  
ACCCACGG 0.0498831939739  
ACCCACGT -1.23686809433  
ACCCACTA -0.0867902373798  
ACCCACTC -1.45811175296  
ACCCACTG -0.631191090396  
ACCCAGAA 1.07423882281  
ACCCAGAC -0.533279984709  
ACCCAGAG -0.119328249278  
ACCCAGAT 2.64760478176  
ACCCAGCA -0.933425772097  
ACCCAGCC -0.783060057885  
ACCCAGCG -0.873397856418  
ACCCAGCT -0.825719059197  
ACCCAGGA -0.00988366650375  
ACCCAGGC -0.992480663844  
ACCCAGGG -1.40860223848  
ACCCAGGT -0.360383999185  
ACCCAGTA -0.0550435100278  
ACCCAGTC -1.02463208921  
ACCCAGTG -0.308765433474  
ACCCATAA 1.27178516431  
ACCCATAC -0.186345116488  
ACCCATAG -0.395369143373  
ACCCATAT 2.23581206027  
ACCCATCA 0.764319458732  
ACCCATCC -0.645138183116  
ACCCATCG 0.200633621115  
ACCCATCT 0.338886707068  
ACCCATGA -0.812450418551  
ACCCATGC -1.08822775931  
ACCCATGG -1.09170058456  
ACCCATTA 1.24861495386  
ACCCATTC -0.912332553462  
ACCCATTG 0.401102781616  
ACCCCAAA -1.07104037615  
ACCCCAAC -0.343910874716  
ACCCCAAG -1.28612529708  
ACCCCAAT 0.330585817834  
ACCCCACA -0.747335049115  
ACCCCACC -0.513188518568  
ACCCCACG 0.123716016805  
ACCCCACT -0.62665489196  
ACCCCAGA -1.03025872397  
ACCCCAGC -0.265553303239  
ACCCCAGG -0.737124751343  
ACCCCAGT -0.0782332892161

ACCCATA -0.554861588912  
ACCCATC -0.0397576246439  
ACCCATG -0.270792935107  
ACCCCAA -0.765314965887  
ACCCCAC -0.949503566561  
ACCCCAG -1.29287546846  
ACCCCAT -0.34689239991  
ACCCCCA -1.34862241192  
ACCCCCC -2.11903003601  
ACCCCCG -1.15475145286  
ACCCCCCT -1.66139048363  
ACCCCCGA -0.72927456746  
ACCCCCGC -0.887296651845  
ACCCCCGG -1.57479364361  
ACCCCCGT -0.793665893841  
ACCCCCCTA -1.10499087572  
ACCCCCCTC -1.31602173844  
ACCCCCCTG -1.40108701299  
ACCCCGAA -0.0477814289714  
ACCCCGAC -0.302569223734  
ACCCCGAG -1.18774870541  
ACCCCGAT 1.04085269378  
ACCCCGCA -0.418821226831  
ACCCCGCC -0.793673180071  
ACCCCGCG -0.313278315974  
ACCCCGCT 0.135514920831  
ACCCCGGA -1.0423659396  
ACCCCGGC -0.252325881835  
ACCCCGGG -0.324947941467  
ACCCCGGT -0.968630544067  
ACCCCGTA -0.169636750888  
ACCCCGTC -1.22266639992  
ACCCCGTG -1.27327780051  
ACCCCTAA 0.249408267284  
ACCCCTAC -0.591424514098  
ACCCCTAG -1.14842138467  
ACCCCTAT 0.197020067538  
ACCCCTCA 0.0570445168824  
ACCCCTCC -0.425509361165  
ACCCCTCG -0.311463003888  
ACCCCTCT -0.4917276576  
ACCCCTGA -0.74828600618  
ACCCCTGC -0.699052952074  
ACCCCTGG -0.839209201226  
ACCCCTTA 0.0633564735855  
ACCCCTTC -1.55611820417  
ACCCCTTG -0.771805747485  
ACCCGAAA 1.31484594915  
ACCCGAAC -0.514534805639  
ACCCGAAG -1.3928036107  
ACCCGAAT 1.82560482238  
ACCCGACA -1.12891302508  
ACCCGACC -0.356229599186  
ACCCGACG -0.778266135096

ACCCGACT -1.03303831651  
ACCCGAGA -0.443108104034  
ACCCGAGC -0.990845842077  
ACCCGAGG 0.11008764459  
ACCCGAGT -1.15828235977  
ACCCGATA 0.595318691608  
ACCCGATC 0.347586048978  
ACCCGATG -0.220738410646  
ACCCGCAA 0.91104642983  
ACCCGCAC -0.452525868193  
ACCCGCAG -0.764436662941  
ACCCGCAT 0.264251566257  
ACCCGCCA -0.882190462069  
ACCCGCCC -0.347057276879  
ACCCGCCG -0.541018168832  
ACCCGCCT 0.450740741916  
ACCCGCGA -0.833483890103  
ACCCGCGC -0.759824687717  
ACCCGCGG -0.375848709464  
ACCCGCGT -0.873145961049  
ACCCGCTA -0.610127641213  
ACCCGCTC -0.894770449919  
ACCCGCTG -1.01884057749  
ACCCGGAA -0.0363682787639  
ACCCGGAC -1.44006584376  
ACCCGGAG -1.51818505144  
ACCCGGAT 1.38914862971  
ACCCGGCA -0.232764645039  
ACCCGGCC -1.43154511857  
ACCCGGCG -1.25416081555  
ACCCGGCT -0.527898167272  
ACCCGGGA -0.852451403267  
ACCCGGGC -0.955844251827  
ACCCGGGG -0.515045674431  
ACCCGGGT -1.27123370081  
ACCCGGTA -0.493950998549  
ACCCGGTC -1.3668538077  
ACCCGGTG -0.769550138947  
ACCCGTAA 1.08633937675  
ACCCGTAC -0.623718125034  
ACCCGTAG 0.159141873801  
ACCCGTAT 0.924363159592  
ACCCGTCA -0.947385563675  
ACCCGTCC -1.36923890295  
ACCCGTCCG -0.870747750586  
ACCCGTCT -0.714718554114  
ACCCGTGA -1.21848556132  
ACCCGTGC -0.912361698381  
ACCCGTGG -0.856978441871  
ACCCGTTA -0.172581636756  
ACCCGTTC -1.20607544671  
ACCCGTTG -1.12838550205  
ACCCTAAA 0.12073865517  
ACCCTAAC -0.342432186442

ACCCTAAG -0.936170807094  
ACCCTAAT 0.606953967732  
ACCCTACA 0.436593381968  
ACCCTACC -0.39078922756  
ACCCTACG -0.269065057778  
ACCCTACT -0.693192741612  
ACCCTAGA -0.131981307603  
ACCCTAGC -0.43879049249  
ACCCTAGG 0.464458838845  
ACCCTAGT -0.353058632019  
ACCCTATA 0.311730720785  
ACCCTATC -0.452805451236  
ACCCTATG -0.479281528198  
ACCCTCAA -0.253444630361  
ACCCTCAC -0.496789297286  
ACCCTCAG -1.10571700056  
ACCCTCAT -0.154499296412  
ACCCTCCA -0.848473538205  
ACCCTCCC -1.05416088824  
ACCCTCCG 0.360438749997  
ACCCTCCT -0.380344313191  
ACCCTCGA -0.926927079736  
ACCCTCGC -0.709975634933  
ACCCTCGG -1.20019608387  
ACCCTCGT -0.830593546869  
ACCCTCTA -0.792569004004  
ACCCTCTC -0.449206470118  
ACCCTCTG -1.47457967298  
ACCCTGAA -0.0247379989112  
ACCCTGAC -0.66514637806  
ACCCTGAG -0.784119475684  
ACCCTGAT 0.00537848658911  
ACCCTGCA -0.543156989517  
ACCCTGCC -0.937304336258  
ACCCTGCG -0.361373885535  
ACCCTGCT 0.0996443956447  
ACCCTGGA -1.1433992988  
ACCCTGGC -1.140955081  
ACCCTGGG -1.14662064504  
ACCCTGTA -0.140155000084  
ACCCTGTC -1.28801846774  
ACCCTGTG -0.339743151325  
ACCCTTAA -0.119424219332  
ACCCTTAC -0.269227020255  
ACCCTTAG -0.43364225076  
ACCCTTAT -0.431006717387  
ACCCTTCA -0.374623581984  
ACCCTTCC -0.960689802758  
ACCCTTCG -0.470411063979  
ACCCTTCT -0.570428306407  
ACCCTTGA -0.520131046408  
ACCCTTGC -0.0360905693232  
ACCCTTGG -0.767800611106  
ACCCTTTA 1.00128659289

ACCCTTTC -1.16157594378  
ACCCTTTG -0.353173338093  
ACCGAAAA -0.0388445559731  
ACCGAAAC -0.0309498220004  
ACCGAAAG 0.206271081125  
ACCGAAAT 5.28143484217  
ACCGAACA -0.228528639267  
ACCGAACC 0.420054056897  
ACCGAACG -0.0609055940913  
ACCGAACT -0.731014102757  
ACCGAAGA 0.452933688879  
ACCGAAGC -0.709205376365  
ACCGAAGG 0.342337465456  
ACCGAAGT -0.667145927669  
ACCGAATA 1.95205629799  
ACCGAATC 4.5160846942  
ACCGAATG -0.0567876252409  
ACCGACAA 0.19603830013  
ACCGACAC -0.256863745694  
ACCGACAG -0.705079704929  
ACCGACAT 2.11850501112  
ACCGACCA -0.74185039175  
ACCGACCC -1.12066667848  
ACCGACCG -0.562116591917  
ACCGACCT -0.89718427373  
ACCGACGA 0.0800115456197  
ACCGACGC -1.14052477709  
ACCGACGG -0.0554748548263  
ACCGACGT -0.632087088471  
ACCGACTA -0.476138040526  
ACCGACTC -1.1150762667  
ACCGACTG 0.184116362911  
ACCGAGAA -0.0535371340811  
ACCGAGAC -0.381862555283  
ACCGAGAG -1.41497685676  
ACCGAGAT 3.25432954552  
ACCGAGCA -0.802964996545  
ACCGAGCC -1.62450113536  
ACCGAGCG -0.888275504761  
ACCGAGCT -0.978440723739  
ACCGAGGA -0.542976915554  
ACCGAGGC -0.6084270352  
ACCGAGGG -1.43729999097  
ACCGAGGT -0.785910014589  
ACCGAGTA 1.38758500481  
ACCGAGTC -1.44702148682  
ACCGAGTG -0.161945823169  
ACCGATAA 1.73528097177  
ACCGATAC 1.92487741213  
ACCGATAG 0.977395045688  
ACCGATAT 4.7663781343  
ACCGATCA -0.152863017399  
ACCGATCC 1.27197502264  
ACCGATCG 1.2653058325

ACCGATCT 1.11637800368  
ACCGATGA -0.378615603149  
ACCGATGC -1.03140120478  
ACCGATGG -0.629421577468  
ACCGATTA 2.11409247041  
ACCGATTC 1.17212952706  
ACCGATTG 0.732445534627  
ACCGCAAA -0.609005978195  
ACCGCAAC -1.1123662056  
ACCGCAAG -0.952698266019  
ACCGCAAT 2.19540637754  
ACCGCACA -0.0803219390051  
ACCGCACC -0.298526407139  
ACCGCACG -0.244575831566  
ACCGCACT 0.678276372164  
ACCGCAGA 0.38557145438  
ACCGCAGC -0.00229620324655  
ACCGCAGG -0.763684515858  
ACCGCAGT -0.291347597279  
ACCGCATA 0.205588049135  
ACCGCATC 0.588187970864  
ACCGCATG -0.524707631373  
ACCGCCAA -0.296813726802  
ACCGCCAC -0.685022171801  
ACCGCCAG -0.124963211152  
ACCGCCAT -0.292863549413  
ACCGCCCA -0.605618505917  
ACCGCCCC -0.871663317393  
ACCGCCCG -0.504680492233  
ACCGCCCT -0.603741156789  
ACCGCCGA 0.0640963381674  
ACCGCCGC -1.20953286679  
ACCGCCGG -0.622217994427  
ACCGCCGT -1.11160510687  
ACCGCCTA -0.441067335183  
ACCGCCTC -1.51797895523  
ACCGCCTG -0.793455009536  
ACCGCGAA -0.195865096041  
ACCGCGAC -0.633226238441  
ACCGCGAG -0.371979305135  
ACCGCGAT 3.97923612236  
ACCGCGCA -0.267391723082  
ACCGCGCC -0.10635522138  
ACCGCGCG -0.253007872935  
ACCGCGCT 0.449628655085  
ACCGCGGA -0.638950092318  
ACCGCGGC -1.17081592393  
ACCGCGGG -0.240803438182  
ACCGCGGT -0.929475594708  
ACCGCGTA -0.11946689582  
ACCGCGTC -0.432284930255  
ACCGCGTG -0.362554879281  
ACCGCTAA 0.423510644268  
ACCGCTAC -0.965226001193

ACCGCTAG -0.69983278683  
ACCGCTAT 0.300932528365  
ACCGCTCA -0.699277784305  
ACCGCTCC -0.418821226831  
ACCGCTCG -0.447051827906  
ACCGCTCT -0.996830542977  
ACCGCTGA -0.871941651368  
ACCGCTGC -0.960261372451  
ACCGCTGG -0.802270722943  
ACCGCTTA -0.936910879854  
ACCGCTTC -1.56228048089  
ACCGCTTG -0.643813338378  
ACCGGAAA 0.310494559872  
ACCGGAAC -0.291880949293  
ACCGGAAG -0.631511892681  
ACCGGAAT 2.73577253291  
ACCGGACA -0.518125251459  
ACCGGACC -1.04072403978  
ACCGGACG -0.970496443405  
ACCGGACT -0.663039824964  
ACCGGAGA -0.0896331160321  
ACCGGAGC -0.409713023346  
ACCGGAGG -0.558386666843  
ACCGGAGT -0.0152475806335  
ACCGGATA 2.89557266552  
ACCGGATC 1.56369858937  
ACCGGATG -0.328424513926  
ACCGGCAA -0.690258889178  
ACCGGCAC -1.03070651483  
ACCGGCAG 0.202514509268  
ACCGGCAT -0.0736204812798  
ACCGGCCA -0.85656083682  
ACCGGCCC -0.886993544689  
ACCGGCCG -0.685131881603  
ACCGGCCT -0.68139862568  
ACCGGCGA -0.205185641077  
ACCGGCGC -0.659279505903  
ACCGGCGG -0.509795633662  
ACCGGCGT -1.10141021427  
ACCGGCTA -1.09968192058  
ACCGGCTC -1.29322937104  
ACCGGCTG -1.15967590325  
ACCGGGA -0.634505284021  
ACCGGGAC -0.722634105886  
ACCGGGAG -0.121486846872  
ACCGGGAT 2.03791181619  
ACCGGGCA -0.869232214808  
ACCGGGCC -1.47522793925  
ACCGGGCG -1.51270039408  
ACCGGGCT -0.887115536992  
ACCGGGGA 0.183291145352  
ACCGGGGC -0.90962957042  
ACCGGGGG -1.28099287688  
ACCGGGTA -0.154749526358

ACCGGGTC -1.23253403672  
ACCGGGTG -0.92146948551  
ACCGGTAA 0.831515775371  
ACCGGTAC -0.569328085722  
ACCGGTAG 0.444371328087  
ACCGGTAT 1.21416399439  
ACCGGTCA 0.246380942931  
ACCGGTCC -0.841020349752  
ACCGGTCCG -0.0887489841021  
ACCGGTCT 0.230532352436  
ACCGGTGA -0.985691563184  
ACCGGTGC -1.02948263641  
ACCGGTGG -1.07859432275  
ACCGGTTA 0.0591737613797  
ACCGGTTT -0.938924377388  
ACCGGTTG -1.15953184408  
ACCGTAAA 0.405582771994  
ACCGTAAC 1.37733681865  
ACCGTAAG 0.0207355688461  
ACCGTAAT 6.16469950267  
ACCGTACA -0.84519869022  
ACCGTACC -0.447080972825  
ACCGTACG -0.587935867316  
ACCGTACT 0.106665406587  
ACCGTAGA 0.288419782006  
ACCGTAGC -0.759218889761  
ACCGTAGG 0.13327513382  
ACCGTAGT 0.174602212342  
ACCGTATA 1.11125016339  
ACCGTATC 2.71124125474  
ACCGTATG 0.214934408243  
ACCGTCAA -0.855141271095  
ACCGTCAC -0.751989284472  
ACCGTCAG -0.573955882473  
ACCGTCAT 0.614065536101  
ACCGTCCA 0.109752478023  
ACCGTCCC 0.0697267201263  
ACCGTCCG 0.0118336697504  
ACCGTCCT -1.33496635203  
ACCGTCGA -1.14924993308  
ACCGTCGC -1.08699597013  
ACCGTCGG -0.621170650952  
ACCGTCGT -0.322949016393  
ACCGTCTA -0.0963626777862  
ACCGTCTC -1.0454278215  
ACCGTCTG -0.745532435886  
ACCGTGAA 0.53270145807  
ACCGTGAC -0.518805368958  
ACCGTGAG -0.561988354274  
ACCGTGAT 1.74341115505  
ACCGTGCA -0.135506593711  
ACCGTGCC -0.283482632759  
ACCGTGCG 0.198725045288  
ACCGTGCT -0.109815764133



ACCGTGGA -0.760540403652  
ACCGTGGC -0.97749538748  
ACCGTGGG -0.460372721228  
ACCGTGTA -0.44764222069  
ACCGTGTC -0.207952326585  
ACCGTGTG -0.347646836951  
ACCGTTAA 0.107917389028  
ACCGTTAC -0.156133910002  
ACCGTTAG 0.236474376848  
ACCGTTAT 0.769514956866  
ACCGTTCA 0.259144960125  
ACCGTTCC 0.549131489695  
ACCGTTCG -0.229648636862  
ACCGTTCT -0.0177854785282  
ACCGTTGA -1.00964785374  
ACCGTTGC 0.111418318312  
ACCGTTGG -0.842328748429  
ACCGTTTA 0.964431177622  
ACCGTTTC -1.78151647098  
ACCGTTTG 0.532997695352  
ACCTAAAA -0.0209014867054  
ACCTAAAC 0.288971037327  
ACCTAAAG 0.621161074764  
ACCTAAAT 2.56735383145  
ACCTAACA 0.0528189200104  
ACCTAACC -0.132561499665  
ACCTAACG -0.151423258409  
ACCTAACT -0.361201097802  
ACCTAAGA 0.115427201894  
ACCTAAGC -0.985406151158  
ACCTAAGG 0.699315256343  
ACCTAAGT -0.568286779408  
ACCTAATA 1.0967428637  
ACCTAATC 0.529992854222  
ACCTAATG 1.82226648011  
ACCTACAA 0.360851775132  
ACCTACAC 1.02480987322  
ACCTACAG -0.0666090465251  
ACCTACAT 0.952424095604  
ACCTACCA 0.208169039874  
ACCTACCC -0.386283006755  
ACCTACCG 0.325528966242  
ACCTACCT -0.908115908244  
ACCTACGA 1.07166074657  
ACCTACGC -0.908220621773  
ACCTACGG -0.563058180973  
ACCTACGT -0.212236837828  
ACCTACTA -0.456174603851  
ACCTACTC -0.633971099295  
ACCTACTG -0.622594796592  
ACCTAGAA 1.62605331046  
ACCTAGAC -0.860001810842  
ACCTAGAG -0.212874278838  
ACCTAGAT 2.39679360299

ACCTAGCA -0.138307212231  
ACCTAGCC -0.568545336473  
ACCTAGCG -0.948965426453  
ACCTAGCT -0.359877293954  
ACCTAGGA -0.755356355307  
ACCTAGGC -0.198669461765  
ACCTAGGG -0.693476280037  
ACCTAGGT -0.77005975867  
ACCTAGTA 0.259962683276  
ACCTAGTC -0.287369732217  
ACCTAGTG -0.508060053747  
ACCTATAA 0.721331952549  
ACCTATAC -0.0410079416611  
ACCTATAG -0.251818760247  
ACCTATAT 1.05791038205  
ACCTATCA -0.0106612113021  
ACCTATCC 0.330363067383  
ACCTATCG 0.00677827540414  
ACCTATCT 0.163240690276  
ACCTATGA 0.140667117943  
ACCTATGC -0.773237595711  
ACCTATGG -0.343657313922  
ACCTATTA 0.766954783926  
ACCTATTC 0.0118307552585  
ACCTATTG -0.0419205939759  
ACCTCAAA -0.263534809433  
ACCTCAAC -0.56008789739  
ACCTCAAG -1.03319320094  
ACCTCAAT 0.905366501509  
ACCTCACA -0.650910958821  
ACCTCACC -0.742363966855  
ACCTCACG -0.259205123565  
ACCTCACT -0.505215509671  
ACCTCAGA -0.0477531167645  
ACCTCAGC -1.09134147753  
ACCTCAGG -0.784119475684  
ACCTCAGT -0.546627316635  
ACCTCATA 0.00141977390222  
ACCTCATC -0.00840477005194  
ACCTCATG -0.191390726469  
ACCTCCAA 0.137396849874  
ACCTCCAC -1.17900522976  
ACCTCCAG -1.17329282567  
ACCTCCAT 0.263000416528  
ACCTCCCA 0.111569871889  
ACCTCCCC -0.629858334894  
ACCTCCCG -0.588971552824  
ACCTCCCT -1.35083867482  
ACCTCCGA -0.906790647149  
ACCTCCGC -1.38148996958  
ACCTCCGG -0.963690896684  
ACCTCCGT -0.713063539082  
ACCTCCTA -1.29144715926  
ACCTCCTC -0.921412028384

ACCTCCTG 0.016609064698  
ACCTCGAA 0.194924131519  
ACCTCGAC -1.01644153431  
ACCTCGAG 0.857604224913  
ACCTCGAT 0.451835549973  
ACCTCGCA -0.668913358817  
ACCTCGCC -0.779796035156  
ACCTCGCG -0.598301674048  
ACCTCGCT -0.461045552496  
ACCTCGGA -0.785188886026  
ACCTCGGC -0.542976915554  
ACCTCGGG -0.299835846705  
ACCTCGTA -0.255338633728  
ACCTCGTC -0.477681263977  
ACCTCGTG -0.120123697383  
ACCTCTAA 0.399417788953  
ACCTCTAC -0.491144967401  
ACCTCTAG 0.054793071904  
ACCTCTAT 0.187809232303  
ACCTCTCA -0.456291599882  
ACCTCTCC -0.665847313357  
ACCTCTCG -0.9031494059  
ACCTCTCT -0.687118524176  
ACCTCTGA 1.16707288364  
ACCTCTGC -1.40543418581  
ACCTCTGG -0.762940279538  
ACCTCTTA 1.22289414665  
ACCTCTTC -1.13206629712  
ACCTCTTG -0.759205150014  
ACCTGAAA 0.522410595415  
ACCTGAAC -0.499215819955  
ACCTGAAG -0.535447950312  
ACCTGAAT 0.737351873531  
ACCTGACA -0.162853062856  
ACCTGACC -1.47671016654  
ACCTGACG -0.590975265993  
ACCTGACT -0.101462205867  
ACCTGAGA 0.327620530523  
ACCTGAGC 0.179457755816  
ACCTGAGG 0.801173624928  
ACCTGAGT -0.288263232156  
ACCTGATA 2.13853444022  
ACCTGATC 0.459728618522  
ACCTGATG 0.0895560901752  
ACCTGCAA 0.324713741227  
ACCTGCAC -0.39963054686  
ACCTGCAG 0.648126161829  
ACCTGCAT 0.529300037867  
ACCTGCCA -0.187671210294  
ACCTGCCC -0.547621158367  
ACCTGCCG -0.615124329366  
ACCTGCCT -0.980531455308  
ACCTGCGA -0.112966121679  
ACCTGCGC -0.659728129474

ACCTGCGG -0.94347743824  
ACCTGCGT -0.664818497723  
ACCTGCTA -1.05026566984  
ACCTGCTC -1.06687057098  
ACCTGCTG -0.0808313505503  
ACCTGGAA -0.0460527189297  
ACCTGGAC -0.645668204283  
ACCTGGAG -1.25283159907  
ACCTGGAT 1.32694567037  
ACCTGGCA -0.324573221083  
ACCTGGCC -1.00176665133  
ACCTGGCG -1.05388942414  
ACCTGGCT -0.966211932161  
ACCTGGGA -1.18941912561  
ACCTGGGC -0.969450973531  
ACCTGGGG -0.925325774625  
ACCTGGTA -0.484150603242  
ACCTGGTC -0.833123950356  
ACCTGGTG -0.55664671519  
ACCTGTAA 1.23105180942  
ACCTGTAC -0.194532340539  
ACCTGTAG 0.0922361736382  
ACCTGTAT 1.00788292073  
ACCTGTCA -0.636026648783  
ACCTGTCC -0.6372334566  
ACCTGTCCG -1.15588248389  
ACCTGTCT -0.73320392705  
ACCTGTGA -1.0077469805  
ACCTGTGC -0.601855064186  
ACCTGTGG -0.63360470603  
ACCTGTTA -0.60917543508  
ACCTGTTC -1.16312999248  
ACCTGTTG -0.0641438027495  
ACCTTAAA 0.0591058953545  
ACCTTAAC 0.0575978539839  
ACCTTAAG 0.441307364408  
ACCTTAAT 0.886122111617  
ACCTTACA -0.106504484999  
ACCTTACC -1.1061375201  
ACCTTACG -0.118003612717  
ACCTTACT -0.436348564649  
ACCTTAGA -0.16742048799  
ACCTTAGC -0.488638920739  
ACCTTAGG 0.111478065395  
ACCTTAGT 0.804413082654  
ACCTTATA 0.48242293409  
ACCTTATC -0.0196869763028  
ACCTTATG 0.453431650634  
ACCTTCAA -0.234853919362  
ACCTTCAC -0.128111486918  
ACCTTCAG -1.0315136209  
ACCTTCAT 1.30381126653  
ACCTTCCA 0.405854236095  
ACCTTCCC -0.506907996742

ACCTTCCG -0.213371407882  
ACCTTCCT -0.852150794247  
ACCTTCGA -1.07195885745  
ACCTTCGC -0.979925657353  
ACCTTCGG -0.803113219275  
ACCTTCGT -0.604472694251  
ACCTTCTA 0.33539139859  
ACCTTCTC -0.272693808348  
ACCTTCTG -0.80927778596  
ACCTTGAA -0.0457381619845  
ACCTTGAC -0.0957239877082  
ACCTTGAG -0.421153861226  
ACCTTGAT 0.690453951956  
ACCTTGCA 0.394886794967  
ACCTTGCC -1.09330147332  
ACCTTGCG -0.41504633531  
ACCTTGCT 0.403996039342  
ACCTTGGA -0.905685222014  
ACCTTGGC -0.290321279781  
ACCTTGGG -0.489941282254  
ACCTTGTA 0.164887794545  
ACCTTGTC -0.790323596187  
ACCTTGTG 0.284361143883  
ACCTTTAA 0.977096726626  
ACCTTTAC -0.0671971493512  
ACCTTTAG -0.215295597058  
ACCTTTAT 0.857686247042  
ACCTTTCA 0.0205935914559  
ACCTTTCC 0.239565403666  
ACCTTTCCG 0.0596280057573  
ACCTTTCT -0.323152198112  
ACCTTTGA -0.221152060316  
ACCTTTGC -0.745046132098  
ACCTTTGG -0.31309220485  
ACCTTTTA 0.420632583535  
ACCTTTTC 0.28449312873  
ACCTTTTG -0.0856594145298  
ACGAAAAA 3.36472175451  
ACGAAAAC 0.173587969167  
ACGAAAAG 0.226799929226  
ACGAAAAT 3.24739576116  
ACGAAACA 0.0982789561982  
ACGAAACC 0.0291848889882  
ACGAAACG 0.84894256322  
ACGAAACT 1.61117816026  
ACGAAAGA 0.779348036118  
ACGAAAGC -0.521393437748  
ACGAAAGG 0.0630925038923  
ACGAAAGT -0.447341819848  
ACGAAATA 3.57191173329  
ACGAAATC 14.7145204847  
ACGAAATG 1.16030293536  
ACGAACAA 0.610977423774  
ACGAACAC 0.269058187904

ACGAACAG -0.153162377351  
ACGAACAT 0.216190554243  
ACGAACCA -1.21962575218  
ACGAACCC -0.666078390928  
ACGAACCG -0.480425258084  
ACGAACCT -0.109274917711  
ACGAACGA 1.29291814494  
ACGAACGC -0.0314298804489  
ACGAACGG -0.649570292556  
ACGAACGT 0.0393152464119  
ACGAACTA 0.132866272245  
ACGAACTC -0.438740946128  
ACGAACTG -0.160027671155  
ACGAAGAA -0.35410951452  
ACGAAGAC -0.353947552043  
ACGAAGAG -0.633457732368  
ACGAAGAT 4.61111836369  
ACGAAGCA 0.396213929663  
ACGAAGCC -0.514626820312  
ACGAAGCG -0.00368017053422  
ACGAAGCT -0.0520740591567  
ACGAAGGA -0.6876943445  
ACGAAGGC -1.03591325457  
ACGAAGGG -1.04250562703  
ACGAAGTA 0.0488660363073  
ACGAAGTC -0.644346274036  
ACGAAGTG -0.706369159408  
ACGAATAA 0.503773668901  
ACGAATAC 0.837904133397  
ACGAATAG 0.167876397792  
ACGAATAT 0.695729182261  
ACGAATCA 2.94496976388  
ACGAATCC 4.26954532782  
ACGAATCG 4.70598091087  
ACGAATCT 6.87777698968  
ACGAATGA 0.655520019554  
ACGAATGC -0.481800898252  
ACGAATGG 0.174215417634  
ACGAATTA 1.05777236004  
ACGAATTC 1.30279785607  
ACGAATTG 0.839455683968  
ACGACAAA 0.398244081436  
ACGACAAC 0.279599905039  
ACGACAAG -0.209918775893  
ACGACAAT 1.42117743824  
ACGACACA -0.528908246887  
ACGACACC 0.300634209303  
ACGACACG -0.673997273548  
ACGACACT -0.0761381859093  
ACGACAGA 0.488546281533  
ACGACAGC -0.856117834054  
ACGACAGG -0.912478694412  
ACGACAGT -1.16338730048  
ACGACATA -0.560740951749

ACGACATC 1.18942412188  
ACGACATG 0.147696456005  
ACGACCAA -0.288652525  
ACGACCAC -0.645285573134  
ACGACCAG -0.455374784007  
ACGACCAT -0.7697643541  
ACGACCCA -1.10989492467  
ACGACCCC -1.07650171758  
ACGACCCG -1.04776857483  
ACGACCCT -0.470230781839  
ACGACCGA -0.258304753752  
ACGACCGC -0.272320961565  
ACGACCGG -0.582700190829  
ACGACCGT -0.542605526017  
ACGACCTA -0.514534805639  
ACGACCTC -0.548164502925  
ACGACCTG -1.12227297987  
ACGACGAA 1.40576144161  
ACGACGAC -0.0867902373798  
ACGACGAG -0.860630924732  
ACGACGAT 1.5566230358  
ACGACGCA -1.19154004299  
ACGACGCC -1.5369520892  
ACGACGCG -0.454275187856  
ACGACGCT -0.0384252854982  
ACGACGGA 0.388692250651  
ACGACGGC -1.10193065925  
ACGACGGG -0.64721704854  
ACGACGTA 0.61201123568  
ACGACGTC -0.863380747822  
ACGACGTG -0.18299594896  
ACGACTAA -0.207733947872  
ACGACTAC -0.174778330923  
ACGACTAG -0.728323818573  
ACGACTAT 0.111405203098  
ACGACTCA 0.982437949355  
ACGACTCC -0.775646215073  
ACGACTCG -0.218124111429  
ACGACTCT 0.658113084616  
ACGACTGA 0.878352076261  
ACGACTGC -0.843069237545  
ACGACTGG -0.531158650975  
ACGACTTA -0.686605157249  
ACGACTTC 0.0922732293207  
ACGACTTG -0.870243959847  
ACGAGAAA 1.50655622883  
ACGAGAAC -0.137701830632  
ACGAGAAG -0.248727733429  
ACGAGAAT 2.50505656748  
ACGAGACA -0.595954467194  
ACGAGACC -0.0960139796504  
ACGAGACG -0.12485974669  
ACGAGACT 1.1791921736  
ACGAGAGA 0.829835362623

ACGAGAGC 0.17184010675  
ACGAGAGG -0.535309720126  
ACGAGAGT -0.492737320859  
ACGAGATA 2.51375257854  
ACGAGATC 7.02601928838  
ACGAGATG 0.326266957222  
ACGAGCAA -0.459400113651  
ACGAGCAC -0.00320843920542  
ACGAGCAG -0.592880510971  
ACGAGCAT -0.0492632399151  
ACGAGCCA -0.825467372005  
ACGAGCCC -1.1100412738  
ACGAGCCG -1.47919039914  
ACGAGCCT -0.621330948005  
ACGAGCGA -0.161999324913  
ACGAGCGC -0.518475823197  
ACGAGCGG -0.952485924468  
ACGAGCGT 0.209603386236  
ACGAGCTA 0.115608733103  
ACGAGCTC -0.860151907174  
ACGAGCTG -0.764673361317  
ACGAGGAA 0.319251358907  
ACGAGGAC 0.151851688716  
ACGAGGAG -0.522931040394  
ACGAGGAT 2.03397121499  
ACGAGGCA 0.45288684883  
ACGAGGCC -0.552024747422  
ACGAGGCG -0.846879311146  
ACGAGGCT -0.293424380922  
ACGAGGGA -0.461605343116  
ACGAGGGC -1.67742893246  
ACGAGGGG -1.12670550566  
ACGAGGTA -0.891955258939  
ACGAGGTC -0.623862808738  
ACGAGGTG -0.107961939118  
ACGAGTAA 0.0945559009978  
ACGAGTAC -0.0328546506229  
ACGAGTAG -0.423170065074  
ACGAGTAT 2.10321725213  
ACGAGTCA -0.00993591917963  
ACGAGTCC -1.04696729774  
ACGAGTCG -0.389047194127  
ACGAGTCT -0.528714224998  
ACGAGTGA -0.0431144947573  
ACGAGTGC 0.0101311901357  
ACGAGTGG -0.568859268885  
ACGAGTTA 0.408357160087  
ACGAGTTC 0.320281839965  
ACGAGTTG 0.0355478492993  
ACGATAAA 0.804493023003  
ACGATAAC 1.14669683819  
ACGATAAG 0.442047645346  
ACGATAAT 3.44453948642  
ACGATACA 1.01269953492



ACGATACC 0.477885486587  
ACGATACG 2.06087072598  
ACGATACT 1.97973460285  
ACGATAGA 1.57656045022  
ACGATAGC 0.476514426335  
ACGATAGG 0.760494188137  
ACGATAGT 0.994166072863  
ACGATATA 2.75569454216  
ACGATATC 8.59895057168  
ACGATATG 3.41862569821  
ACGATCAA 0.556208292339  
ACGATCAC 2.49938975437  
ACGATCAG 1.34232981577  
ACGATCAT 0.926742634035  
ACGATCCA 0.814322771407  
ACGATCCC 2.81981960889  
ACGATCCG 2.76405455394  
ACGATCCT 4.40548056001  
ACGATCGA 0.577991204661  
ACGATCGC 3.72734866338  
ACGATCGG 0.647357776862  
ACGATCGT 2.70907058282  
ACGATCTA 3.49185189038  
ACGATCTC 4.15867181131  
ACGATCTG 4.3315170014  
ACGATGAA -0.000572905832684  
ACGATGAC 0.153690524915  
ACGATGAG -0.945340839443  
ACGATGAT 1.49652163329  
ACGATGCA 1.26545988422  
ACGATGCC 0.216893987677  
ACGATGCG 1.21722795807  
ACGATGCT 0.772730682301  
ACGATGGA 0.00638814984802  
ACGATGGC -0.524519438469  
ACGATGGG 0.933311898736  
ACGATGTA 0.582940428232  
ACGATGTC -0.254865653331  
ACGATGTG -0.337969683015  
ACGATTAA 0.257440815087  
ACGATTAC 8.50731186887  
ACGATTAG 0.0307000084106  
ACGATTAT 2.77628376188  
ACGATTCA 2.240050356  
ACGATTCC 7.00531078267  
ACGATTCCG 4.04785283744  
ACGATTCT 5.34233502363  
ACGATTGA 0.824445634423  
ACGATTGC 3.41339251986  
ACGATTGG 1.34402334373  
ACGATTTA 1.92647538639  
ACGATTTT 9.80138248718  
ACGATTTG 3.34961261224  
ACGCAAAA 1.36732200001

ACGCAAAC 0.000179657606688  
ACGCAAAG -0.967541356815  
ACGCAAAT 1.63611205466  
ACGCAACA 1.58724352021  
ACGCAACC 0.913037027785  
ACGCAACG 0.666605497603  
ACGCAACT 0.531170725298  
ACGCAAGA 0.232905997895  
ACGCAAGC -0.0520740591567  
ACGCAAGG -0.353002423962  
ACGCAAGT -0.546859643274  
ACGCAATA 2.70597830694  
ACGCAATC 17.9473377493  
ACGCAATG 0.77836002337  
ACGCACAA 0.432198744566  
ACGCACAC 0.525971688138  
ACGCACAG -0.383800692384  
ACGCACAT 0.60347260718  
ACGCACCA -1.37269111859  
ACGCACCC -1.08553414428  
ACGCACCG -0.253078653452  
ACGCACCT -0.0192695794298  
ACGCACGA 0.370628021792  
ACGCACGC 0.523462726984  
ACGCACGG -0.160264994066  
ACGCACGT 0.0256825024588  
ACGCACTA 0.52468722993  
ACGCACTC -0.985869763545  
ACGCACTG 0.161383742592  
ACGCAGAA 1.29984464308  
ACGCAGAC -0.185319423524  
ACGCAGAG 0.0271980382371  
ACGCAGAT 3.26490332207  
ACGCAGCA -0.269087124645  
ACGCAGCC -1.3006078236  
ACGCAGCG -0.448080019006  
ACGCAGCT 0.118085634846  
ACGCAGGA -0.341710433345  
ACGCAGGC -1.66935100185  
ACGCAGGG -0.629323733812  
ACGCAGTA -0.376667265326  
ACGCAGTC -0.915113811429  
ACGCAGTG -1.09504621307  
ACGCATAA 1.00946882066  
ACGCATAC 0.797720992938  
ACGCATAG 0.205692762665  
ACGCATAT 2.08611418106  
ACGCATCA 0.579825252766  
ACGCATCC 0.257900263914  
ACGCATCG 0.612565613672  
ACGCATCT -0.158270440729  
ACGCATGA -0.269266574073  
ACGCATGC -0.356485866294  
ACGCATGG -0.00942192771855

ACGCATTA 0.358584508626  
ACGCATTC 0.18507731252  
ACGCATTG 0.252723918155  
ACGCCAAA 0.946637371974  
ACGCCAAC -1.0696031153  
ACGCCAAG -1.0421852411  
ACGCCAAT -0.138936742478  
ACGCCACA -0.283332744605  
ACGCCACC -0.821993714039  
ACGCCACG -0.487313451467  
ACGCCACT -0.585050520354  
ACGCCAGA -0.59377817447  
ACGCCAGC -0.908230197961  
ACGCCAGG -1.04705369161  
ACGCCAGT -0.822858069059  
ACGCCATA -0.355757659679  
ACGCCATC -0.742354807024  
ACGCCATG -0.126904054567  
ACGCCCAA 0.440215262664  
ACGCCCAC -1.05624932985  
ACGCCCAG -1.01990686516  
ACGCCCAT -0.937121347803  
ACGCCCCA -1.36599902887  
ACGCCCCC -1.23681375987  
ACGCCCCG -1.33103178799  
ACGCCCCT -1.40485003836  
ACGCCCGA -0.481849195546  
ACGCCCGC -1.11414154752  
ACGCCCGG -0.411008514987  
ACGCCCGT -0.197896496882  
ACGCCCTA -0.849567721728  
ACGCCCTC -1.35375358305  
ACGCCCTG -0.747147688923  
ACGCCGAA 1.30183482468  
ACGCCGAC -0.983354140695  
ACGCCGAG -0.183537628094  
ACGCCGAT 1.11605969953  
ACGCCGCA -0.428454247033  
ACGCCGCC -0.289464002811  
ACGCCGCG 0.236786852013  
ACGCCGCT -0.9011696332  
ACGCCGGA -0.0992904930591  
ACGCCGGC -0.741075969622  
ACGCCGGG -0.164942753535  
ACGCCGTA -0.994739811408  
ACGCCGTC -1.5049986411  
ACGCCGTG -0.882240424787  
ACGCCTAA 0.751336854646  
ACGCCTAC -0.893916295619  
ACGCCTAG -0.185454947396  
ACGCCTAT -0.620503648667  
ACGCCTCA -0.605656186133  
ACGCCTCC -0.839103238628  
ACGCCTCG -0.83768721193

ACGCCTCT -1.20963112681  
ACGCCTGA -0.0128955856852  
ACGCCTGC -1.49639901645  
ACGCCTGG -0.693885557968  
ACGCCTTA 0.0823702022637  
ACGCCTTC -0.931065241852  
ACGCCTTG -0.555912263235  
ACGCGAAA 1.97965153984  
ACGCGAAC 0.303484166007  
ACGCGAAG -0.49943815405  
ACGCGAAT 2.93013479203  
ACGCGACA 0.677705964467  
ACGCGACC -0.636167793461  
ACGCGACG 0.10398990304  
ACGCGACT -0.913881814075  
ACGCGAGA 1.18370255796  
ACGCGAGC -0.273060826147  
ACGCGAGG -0.0613933551254  
ACGCGAGT 0.224335934518  
ACGCGATA 2.32682498003  
ACGCGATC 12.2293399191  
ACGCGATG 0.575514719274  
ACGCGCAA 0.591388707484  
ACGCGCAC 0.355947934364  
ACGCGCAG -0.232221716837  
ACGCGCAT 0.278346048996  
ACGCGCCA -1.13137910157  
ACGCGCCC -0.436094171144  
ACGCGCCG -1.00713014911  
ACGCGCCT -0.0303161281942  
ACGCGCGA 2.04838691637  
ACGCGCGC 0.423374495862  
ACGCGCGG 0.239109077509  
ACGCGCGT 1.16722485358  
ACGCGCTA 0.413598457379  
ACGCGCTC -0.328439086385  
ACGCGCTG -0.401557442349  
ACGCGGAA 0.171968344393  
ACGCGGAC -0.283032968297  
ACGCGGAG -0.972304052905  
ACGCGGAT 1.94035294766  
ACGCGGCA -0.870318903924  
ACGCGGCC -1.02347128873  
ACGCGGCG -0.352278797263  
ACGCGGCT -0.623459776146  
ACGCGGGA -0.415003242466  
ACGCGGGC -1.01705690846  
ACGCGGGG -0.21825255725  
ACGCGGTA -0.432284930255  
ACGCGGTC -0.799979724146  
ACGCGGTG -0.305978138345  
ACGCGTAA 0.244884143172  
ACGCGTAC 0.224998565065  
ACGCGTAG 0.147106687755

ACGCGTAT 2.14234326475  
ACGCGTCA -0.376995562019  
ACGCGTCC 0.706279018338  
ACGCGTCG 0.256619969266  
ACGCGTCT -0.0499131716046  
ACGCGTGA 0.741403849958  
ACGCGTGC 0.0038920957296  
ACGCGTGG 1.2550239215  
ACGCGTTA 0.0657068031099  
ACGCGTTC -0.464266482381  
ACGCGTTG 0.25136659765  
ACGCTAAA 0.845215136281  
ACGCTAAC -0.159219524192  
ACGCTAAG 0.718654991756  
ACGCTAAT 0.300533242977  
ACGCTACA -0.252769092779  
ACGCTACC -0.376551102007  
ACGCTACG -0.385558130989  
ACGCTACT -0.0985437586035  
ACGCTAGA -0.863607453655  
ACGCTAGC -0.207574691708  
ACGCTAGG -0.460172454  
ACGCTAGT -0.371432629729  
ACGCTATA 0.779348036118  
ACGCTATC 0.808259587403  
ACGCTATG 0.591759680665  
ACGCTCAA 0.00648890799591  
ACGCTCAC -1.26097614664  
ACGCTCAG -1.10898789316  
ACGCTCAT -0.79311463852  
ACGCTCCA -0.518394009246  
ACGCTCCC -0.749576917906  
ACGCTCCG 0.145356951736  
ACGCTCCT 0.368626598582  
ACGCTCGA 0.0823048343744  
ACGCTCGC 1.20254433162  
ACGCTCGG -0.452880395313  
ACGCTCTA -0.199485519491  
ACGCTCTC -1.36734718954  
ACGCTCTG -0.257999356638  
ACGCTGAA -0.0801283334729  
ACGCTGAC -0.094893982056  
ACGCTGAG 0.36857184777  
ACGCTGAT 3.8880472922  
ACGCTGCA 0.684769027363  
ACGCTGCC 0.237723861153  
ACGCTGCG 0.23176747246  
ACGCTGCT -0.0443036074449  
ACGCTGGA 0.433863752143  
ACGCTGGC -0.0563756409956  
ACGCTGGG -0.851024967669  
ACGCTGTA -0.919698307158  
ACGCTGTC -1.2454344105  
ACGCTGTG -0.340506956376

ACGCTTAA -0.0998942092345  
ACGCTTAC 0.301592452598  
ACGCTTAG -0.408133576924  
ACGCTTAT -0.330806486505  
ACGCTTCA -0.91656689381  
ACGCTTCC -0.32832875205  
ACGCTTCG -0.107359888367  
ACGCTTCT -0.331654603642  
ACGCTTGA 0.452969495493  
ACGCTTGC -0.703968867166  
ACGCTTGG -0.124578081868  
ACGCTTTA 0.521762537327  
ACGCTTTC -1.23839487172  
ACGCTTTG -0.405967901278  
ACGGAAAA 1.8306291982  
ACGGAAAC -0.677137222194  
ACGGAAAG 0.36886621145  
ACGGAAAT 4.47472347449  
ACGGAAACA 0.648664718293  
ACGGAAACC 0.233717475706  
ACGGAACG -0.760486277374  
ACGGAACT -0.00550047889214  
ACGGAAGA -0.0225729477993  
ACGGAAGC -0.856098265323  
ACGGAAGG -1.10110752347  
ACGGAAGT -0.275372018209  
ACGGAATA 2.99330473813  
ACGGAATC 9.22463410513  
ACGGAATG 0.152013443015  
ACGGACAA 1.09737801475  
ACGGACAC -0.137979956428  
ACGGACAG -0.970119433062  
ACGGACAT -0.296564954102  
ACGGACCA -0.555291060109  
ACGGACCC 0.321216767325  
ACGGACCG -1.05365647297  
ACGGACCT -1.51862264158  
ACGGACGA -0.00965362982312  
ACGGACGC -0.633646341628  
ACGGACGG -0.164634233752  
ACGGACGT -0.0842234027443  
ACGGACTA 0.0597554106881  
ACGGACTC -1.11261893369  
ACGGACTG -1.0120319081  
ACGGAGAA 1.45483357413  
ACGGAGAC 0.506352994216  
ACGGAGAG -0.430848710291  
ACGGAGAT 3.00932486729  
ACGGAGCA 0.26379107654  
ACGGAGCC -0.985731741537  
ACGGAGCG -0.554466258906  
ACGGAGCT -1.59663463759  
ACGGAGGA -0.183771620157  
ACGGAGGC -0.799387041405

ACGGAGGG -0.731449611115  
ACGGAGTA 1.2269563238  
ACGGAGTC -0.733691896262  
ACGGAGTG -0.45215093963  
ACGGATAA 0.413129224186  
ACGGATAC 2.27012354048  
ACGGATAG 0.179731301697  
ACGGATAT 7.14377891649  
ACGGATCA 0.148221689078  
ACGGATCC 1.47818947935  
ACGGATCG 2.1303846882  
ACGGATCT 2.77870445556  
ACGGATGA -0.270278319112  
ACGGATGC -0.100677791195  
ACGGATGG 0.476634753214  
ACGGATTA 2.68509971981  
ACGGATTC 7.81405938018  
ACGGATTG 1.43236450715  
ACGGCAAA 1.03857876558  
ACGGCAAC -0.232489017378  
ACGGCAAG -0.385072243556  
ACGGCAAT 2.04889029075  
ACGGCACA -0.157810367367  
ACGGCACC 0.237586047323  
ACGGCACG -0.800777878566  
ACGGCACT -0.656555496884  
ACGGCAGA -0.190559055393  
ACGGCAGC -1.12565087596  
ACGGCAGG -0.953073194582  
ACGGCAGT -0.669688613657  
ACGGCATA 0.686338689419  
ACGGCATC 0.509039114841  
ACGGCATG 0.875911813844  
ACGGCCAA 0.108778205023  
ACGGCCAC -1.20307060558  
ACGGCCAG -0.810871596663  
ACGGCCAT -0.51964370173  
ACGGCCCA -1.32304982744  
ACGGCCCC -0.670031066453  
ACGGCCCG -1.35061883886  
ACGGCCCT -1.34873003994  
ACGGCCGA -0.576478167019  
ACGGCCGC -1.31988489743  
ACGGCCGG 0.0584289005261  
ACGGCCGT -0.543485286209  
ACGGCCTA -0.633575977467  
ACGGCCTC -0.502215664813  
ACGGCCTG -1.67926277239  
ACGGCGAA -0.655285194779  
ACGGCGAC -0.960815542265  
ACGGCGAG -1.31018650934  
ACGGCGAT 0.716523249123  
ACGGCGCA -0.475159395788  
ACGGCGCC -0.393174530987

ACGGCGCG -0.437232072046  
ACGGCGCT -1.12011583952  
ACGGCGGA -0.836550768274  
ACGGCGGC -1.51561405325  
ACGGCGGG -1.06195757038  
ACGGCGTA -0.732875422179  
ACGGCGTC -1.51970017086  
ACGGCGTG -1.24582869962  
ACGGCTAA 0.648533774336  
ACGGCTAC -0.922308859172  
ACGGCTAG -1.07650171758  
ACGGCTAT -1.01252549811  
ACGGCTCA -0.386395839226  
ACGGCTCC 0.585501433883  
ACGGCTCG -0.385558130989  
ACGGCTCT -0.391971678552  
ACGGCTGA -0.0870219394844  
ACGGCTGC -1.17603328075  
ACGGCTGG -1.02364574189  
ACGGCTTA 0.349981344948  
ACGGCTTC -0.597671935624  
ACGGCTTG -1.38751672243  
ACGGGAAA 0.468016808899  
ACGGGAAC -0.777374925114  
ACGGGAAG -1.15666606585  
ACGGGAAT 3.43716457289  
ACGGGACA -0.280518178159  
ACGGGACC -0.824254110671  
ACGGGACG -1.13530159129  
ACGGGACT -0.75007196517  
ACGGGAGA -0.754251346528  
ACGGGAGC -0.941179985926  
ACGGGAGG 0.225239218823  
ACGGGAGT -0.75895054833  
ACGGGATA 1.26915129636  
ACGGGATC 1.42263218604  
ACGGGATG -1.12875980608  
ACGGGCAA -0.459344738306  
ACGGGCAC -1.05810148944  
ACGGGCAG -0.614955288837  
ACGGGCAT -0.594000716743  
ACGGGCCA -0.818338941219  
ACGGGCCC -1.01961916318  
ACGGGCCG -1.23476612115  
ACGGGCCT -1.93433410557  
ACGGGCGA 0.507186122539  
ACGGGCGC -0.990990942137  
ACGGGCGG -1.00897210798  
ACGGGCTA 0.2563718211  
ACGGGCTC -0.272771875095  
ACGGGCTG -1.16421376711  
ACGGGGAA -0.386730173081  
ACGGGGAC -1.25752830274  
ACGGGGAG -1.54617499876



ACGGGGAT 0.38346739942  
ACGGGGCA -1.09350069966  
ACGGGGCC -1.18168864407  
ACGGGGCG -0.460694564403  
ACGGGGCT -1.30849776947  
ACGGGGGA -0.0258261452729  
ACGGGGGC -1.35881022647  
ACGGGGGG -1.01934624183  
ACGGGGTA -0.119889705321  
ACGGGGTC -1.53371304783  
ACGGGGTG -0.900411032599  
ACGGGTAA -0.621793935858  
ACGGGTAC 0.217469183467  
ACGGGTAG -1.02563758891  
ACGGGTAT 0.333602108753  
ACGGGTCA -0.862887990516  
ACGGGTCC -0.595815196118  
ACGGGTCCG -1.83399335455  
ACGGGTCT -1.12501968029  
ACGGGTGA -0.920574736502  
ACGGGTGC -1.4737044927  
ACGGGTGG -0.121147308568  
ACGGGTTA 0.569070777724  
ACGGGTTC -1.25200076071  
ACGGGTTG -0.33956536732  
ACGGTAAA 1.1220389878  
ACGGTAAC -0.563289674899  
ACGGTAAG -0.348912975496  
ACGGTAAT 1.39650938713  
ACGGTACA -0.4835579205  
ACGGTACC 0.679499417864  
ACGGTACG 0.200715643243  
ACGGTACT 0.777590597514  
ACGGTAGA -0.0696671812207  
ACGGTAGC -0.257093366019  
ACGGTAGG -0.301185464624  
ACGGTAGT -0.0938961849426  
ACGGTATA 0.764699799922  
ACGGTATC 1.58015880681  
ACGGTATG -1.36790781287  
ACGGTCAA -0.367567805317  
ACGGTCAC -0.392774412887  
ACGGTCAG -1.06120417423  
ACGGTCAT -0.875753598571  
ACGGTCCA -0.0674348886175  
ACGGTCCC -0.73346310865  
ACGGTCCG -1.11040017265  
ACGGTCCT -1.51313840057  
ACGGTCGA -0.321364365521  
ACGGTCGC -0.853848693946  
ACGGTCGG -0.647733954493  
ACGGTCTA 0.243101723208  
ACGGTCTC -0.840573599782  
ACGGTCTG -0.409331224909

ACGGTGAA 0.000145308238086  
ACGGTGAC -0.712972357121  
ACGGTGAG -1.01931730509  
ACGGTGAT 2.21443009877  
ACGGTGCA -0.193395688705  
ACGGTGCC -1.05534687826  
ACGGTGCG -0.512084550679  
ACGGTGCT -0.691026857789  
ACGGTGGA -0.0823048343744  
ACGGTGGC -0.802224299251  
ACGGTGGG -0.514151758135  
ACGGTGTA 0.414395570909  
ACGGTGTC -0.981252375693  
ACGGTGTG -0.529920824637  
ACGGTTAA 0.329967529199  
ACGGTTAC 0.715821272936  
ACGGTTAG -0.241229994886  
ACGGTTAT 0.508404380145  
ACGGTTCA -1.13450864132  
ACGGTTCC -0.908682776914  
ACGGTTCG -0.116532210673  
ACGGTTCT -0.85404625486  
ACGGTTGA -0.35550264164  
ACGGTTGC -0.401182721965  
ACGGTTGG 0.593402205018  
ACGGTTTA -0.107994414885  
ACGGTTTC -0.365645489743  
ACGGTTTG -0.920723791944  
ACGTAAAA 1.64381255856  
ACGTAAAC -0.420909668442  
ACGTAAAG 0.648139277042  
ACGTAAAT 2.17222783997  
ACGTAACA 1.4341460944  
ACGTAACC 1.31074192822  
ACGTAACG 0.461175455563  
ACGTAACT 0.779590771656  
ACGTAAGA 0.153364726358  
ACGTAAGC 0.252265302039  
ACGTAAGG -0.150319498698  
ACGTAAGT 1.15428867318  
ACGTAATA 2.14451810023  
ACGTAATC 13.4356645549  
ACGTAATG 0.975544551521  
ACGTACAA 0.876597968504  
ACGTACAC 0.244843964819  
ACGTACAG -0.637069204165  
ACGTACAT 0.0408586780411  
ACGTACCA -0.522630431374  
ACGTACCC 0.465219313049  
ACGTACCG -0.642433951006  
ACGTACCT -0.253216467283  
ACGTACGA 0.908471684431  
ACGTACGC -0.462709519183  
ACGTACGG -0.214070053222

ACGTACGT 0.287499218927  
ACGTAATA 1.33535980843  
ACGTACTC -0.0350213671587  
ACGTACTG -0.33706639871  
ACGTAGAA 2.03704829388  
ACGTAGAC 0.151577726479  
ACGTAGAG 0.264130406666  
ACGTAGAT 1.12352204781  
ACGTAGCA 0.465090867228  
ACGTAGCC -0.752448108765  
ACGTAGCG -0.644288816911  
ACGTAGCT -0.346034914763  
ACGTAGGA 0.334132754453  
ACGTAGGC -0.721455818454  
ACGTAGGG -0.503044213219  
ACGTAGTA 0.328537762753  
ACGTAGTC -0.468203960913  
ACGTAGTG -1.16788685959  
ACGTATAA 2.3778556511  
ACGTATAC 0.54858273251  
ACGTATAG 0.151905814994  
ACGTATAT 1.23837925837  
ACGTATCA 2.22745079942  
ACGTATCC 4.00456930215  
ACGTATCG 1.04838852889  
ACGTATCT 4.5798770925  
ACGTATGA -0.129678026304  
ACGTATGC -0.688757301325  
ACGTATGG 0.0914167850635  
ACGTATTA 1.98123161079  
ACGTATTC 1.48399993527  
ACGTATTG 1.827356432  
ACGTCAAA 1.18600417384  
ACGTCAAC -0.494846996625  
ACGTCAAG 1.14626195436  
ACGTCAAT 1.13436395761  
ACGTCACA 0.638877854555  
ACGTCACC 0.890494473973  
ACGTCACG 0.331386470389  
ACGTCACT -0.00724043054533  
ACGTCAGA 0.316849817597  
ACGTCAGC -0.0401371331225  
ACGTCAGG -0.630898808496  
ACGTCAGT -0.60470085733  
ACGTCATA 0.395523611443  
ACGTCATC -0.164345699055  
ACGTCATG 0.457962436442  
ACGTCCAA 0.123266560521  
ACGTCCAC -0.527898167272  
ACGTCCAG 0.301965507559  
ACGTCCAT -0.213817741496  
ACGTCCCA -0.908230197961  
ACGTCCCC 0.306939712488  
ACGTCCCG -1.07291231265

ACGTCCCT -0.116557192032  
ACGTCCGA -0.876877551547  
ACGTCCGC -0.0386032776809  
ACGTCCGG -0.614376970376  
ACGTCCTA -0.0650793546434  
ACGTCCTC -0.758554801968  
ACGTCCTG -0.213304166391  
ACGTCGAA 0.553009845678  
ACGTCGAC 0.40895275732  
ACGTCGAG -0.785958936417  
ACGTCGAT 0.562287089692  
ACGTCGCA -0.406626160087  
ACGTCGCC -0.426974309691  
ACGTCGCG -1.11711162292  
ACGTCGCT -0.232477983945  
ACGTCGGA 0.0886954823583  
ACGTCGGC -1.37237947613  
ACGTCGGG -0.512776950679  
ACGTCGTA 0.981794263005  
ACGTCGTC 0.129918263707  
ACGTCGTG -0.380948237544  
ACGTCTAA 1.0777453729  
ACGTCTAC -0.67964077072  
ACGTCTAG -0.782512757945  
ACGTCTAT 0.395523611443  
ACGTCTCA -0.118003612717  
ACGTCTCC -0.325029130884  
ACGTCTCG 0.399747542891  
ACGTCTCT -0.564081167623  
ACGTCTGA 0.0256825024588  
ACGTCTGC -1.08434961151  
ACGTCTGG 0.360958362264  
ACGTCTTA 0.104882778445  
ACGTCTTC -0.351325758418  
ACGTCTTG -0.093297256861  
ACGTGAAA 1.36688669983  
ACGTGAAC 0.996171659634  
ACGTGAAG -0.504804774493  
ACGTGAAT 0.965538684537  
ACGTGACA 0.110059748739  
ACGTGACC -0.354832308507  
ACGTGACG -0.768083108641  
ACGTGACT 0.447670116541  
ACGTGAGA -0.18339502617  
ACGTGAGC -1.10020340645  
ACGTGAGG 0.308936972139  
ACGTGAGT -0.158426366044  
ACGTGATA 1.54368810447  
ACGTGATC 2.52189899971  
ACGTGATG -0.410841972594  
ACGTGCAA 0.851361591481  
ACGTGCAC -0.186066782513  
ACGTGCAG 0.377669434178  
ACGTGCAT -0.86146759208

ACGTGCCA -0.945641864818  
ACGTGCCC 0.0447622235603  
ACGTGCCG -0.810871596663  
ACGTGCCT -0.938948109679  
ACGTGCGA 0.966871856394  
ACGTGCGC -0.672098065731  
ACGTGCGG 0.252990385984  
ACGTGCTA 0.755253515379  
ACGTGCTC -0.00474062922307  
ACGTGCTG -0.536015235339  
ACGTGGAA -0.377276810486  
ACGTGGAC 0.604125869717  
ACGTGGAG -0.606584868153  
ACGTGGAT 2.63029977803  
ACGTGGCA -0.386199943736  
ACGTGGCC 0.087964361252  
ACGTGGCG -1.13816237325  
ACGTGGCT -0.681278090623  
ACGTGGGA -0.201398883411  
ACGTGGGC -0.911234206379  
ACGTGGGG 0.706768861152  
ACGTGGTA 0.250549915389  
ACGTGGTC -0.758665344482  
ACGTGGTG -1.20494420751  
ACGTGTAA 0.676702546548  
ACGTGTAC -0.561549723246  
ACGTGTAG 1.12830472899  
ACGTGTAT 0.735294242263  
ACGTGTCA -0.625935012466  
ACGTGTCC -0.476943689353  
ACGTGTCC -0.476943689353  
ACGTGTCCG -1.11821496628  
ACGTGTCT 0.339842452227  
ACGTGTGA -0.808230858841  
ACGTGTGC 0.415644847036  
ACGTGTGG -0.193914260082  
ACGTGTGA 0.451178956588  
ACGTGTTC 0.707472919119  
ACGTGTTG -0.12928873346  
ACGTTAAA 0.99390834851  
ACGTTAAC 0.724584317311  
ACGTTAAG 0.348772038996  
ACGTTAAT 1.89547435261  
ACGTTACA 0.650851628094  
ACGTTACC 0.240593802944  
ACGTTACG 0.732445534627  
ACGTTACT 0.0360905693232  
ACGTTAGA 0.732840031921  
ACGTTAGC -0.219822635662  
ACGTTAGG -0.207937337769  
ACGTTAGT 0.923218180639  
ACGTTATA 2.43952713202  
ACGTTATC 1.45264145988  
ACGTTATG -0.277569545087  
ACGTTCAA -0.187756563271

ACGTTCAC -0.227076389598  
ACGTTCAG -1.10256476941  
ACGTTCAT -0.159441858287  
ACGTTCCA -0.247584003544  
ACGTTCCC -0.259557777083  
ACGTTCCG -0.891944433684  
ACGTTCCCT 0.599168110849  
ACGTTCGA -0.296586188258  
ACGTTCGC -0.0203831235064  
ACGTTCGG -0.473948632589  
ACGTTCTA 1.32150223225  
ACGTTCTC -0.392456733272  
ACGTTCTG 0.344389684096  
ACGTTGAA 0.954481726873  
ACGTTGAC -0.269032165655  
ACGTTGAG 0.0397018329422  
ACGTTGAT 1.24315402878  
ACGTTGCA 1.26146890394  
ACGTTGCC -0.305660875086  
ACGTTGCG 0.87477516201  
ACGTTGCT -0.0180432028817  
ACGTTGGA -0.430819565373  
ACGTTGGC -0.900670838733  
ACGTTGGG 0.0356829568158  
ACGTTGTA 0.160339729964  
ACGTTGTC 0.0590299103876  
ACGTTGTG -0.409755908012  
ACGTTTAA -0.418654268082  
ACGTTTAC 0.398622965381  
ACGTTTAG -0.390537956724  
ACGTTTAT 0.0523600957171  
ACGTTTCA 0.792491353613  
ACGTTTCC 0.349720914281  
ACGTTTCG 0.28292388303  
ACGTTTCT 0.355525124863  
ACGTTTGA 1.03377734838  
ACGTTTGC -0.164345699055  
ACGTTTGG 0.444767074449  
ACGTTTTA 0.0962873173533  
ACGTTTTC -0.21444747992  
ACGTTTTG 0.234308493024  
ACTAAAAA 2.07737695075  
ACTAAAAC 1.17846271791  
ACTAAAAG 0.325332654396  
ACTAAAAT 2.66862992619  
ACTAAACA 2.27827974601  
ACTAAACC -0.104729767622  
ACTAAACG 1.27019884802  
ACTAAACT 0.0996323213212  
ACTAAAGA 0.606560719506  
ACTAAAGC -0.566781652529  
ACTAAAGG 0.553947062995  
ACTAAAGT -0.0543148870575  
ACTAAATA 0.392729030085

ACTAAATC 2.47989784085  
ACTAAATG 0.177484644813  
ACTAACAA 0.308657597274  
ACTAACAC 0.214490780943  
ACTAACAG 0.68892051287  
ACTAACAT 1.84310197439  
ACTAACCA 0.2325323184  
ACTAACCC -0.943703311361  
ACTAACCG 0.273357687963  
ACTAACCT -0.37308368938  
ACTAACGA 0.42263775395  
ACTAACGC -0.875335160808  
ACTAACGG 0.961557280449  
ACTAACTA 1.87586440216  
ACTAACTC 0.572099351145  
ACTAACTG 0.745043633962  
ACTAAGAA 1.0662980815  
ACTAAGAC -0.459597674565  
ACTAAGAG 0.308132156024  
ACTAAGAT 2.83528140468  
ACTAAGCA 0.014276013947  
ACTAAGCC -0.588176104718  
ACTAAGCG -0.203987784914  
ACTAAGCT -0.230335832412  
ACTAAGGA -0.539993724935  
ACTAAGGC 0.0626124454438  
ACTAAGGG -0.119252056133  
ACTAAGTA 0.188204562308  
ACTAAGTC -0.676910724539  
ACTAAGTG -0.162888036759  
ACTAATAA 0.40026382431  
ACTAATAC -0.0824058007003  
ACTAATAG -0.385072243556  
ACTAATAT 2.40064281405  
ACTAATCA 1.62286381545  
ACTAATCC -0.219169997658  
ACTAATCG 0.498203242204  
ACTAATCT 1.68195451382  
ACTAATGA 0.625484098936  
ACTAATGC -0.100114045194  
ACTAATGG 0.178246159906  
ACTAATTA 2.04934536784  
ACTAATTC 1.74495666846  
ACTAATTG 1.28123644513  
ACTACAAA 0.631603907353  
ACTACAAC 1.22300697912  
ACTACAAG 0.0137297548972  
ACTACAAT 2.02931802052  
ACTACACA -0.172190262132  
ACTACACC 0.53117780335  
ACTACACG -0.5115310054  
ACTACACT 0.818315833462  
ACTACAGA -0.166869232669  
ACTACAGC -0.239332244316

ACTACAGG -0.155100306274  
ACTACAGT 0.3109662912  
ACTACATA 0.306069112128  
ACTACATC 0.149006728284  
ACTACATG -0.251236694583  
ACTACCAA 0.590105081988  
ACTACCAC 0.784798968648  
ACTACCAG -0.875949702239  
ACTACCAT 0.207874884372  
ACTACCCA 0.335959308151  
ACTACCCC -0.704432271375  
ACTACCCG 0.0130654589263  
ACTACCCT -0.409379522203  
ACTACCGA 0.440272095256  
ACTACCGC -0.833483890103  
ACTACCGG 0.849160317399  
ACTACCTA 0.384520988235  
ACTACCTC -0.461282250873  
ACTACCTG -0.434473921836  
ACTACGAA 0.772124884346  
ACTACGAC -1.26822240617  
ACTACGAG 0.621446694968  
ACTACGAT 1.33469488793  
ACTACGCA 0.497104478765  
ACTACGCC -0.314232395709  
ACTACGCG 0.556461436777  
ACTACGCT -0.3637427429  
ACTACGGA 0.165757562194  
ACTACGGC -0.710277076665  
ACTACGGG -0.436343984734  
ACTACGTA -0.379176018302  
ACTACGTC -0.625799904949  
ACTACGTG -0.583038271888  
ACTACTAA 0.744755307444  
ACTACTAC 0.482916940464  
ACTACTAG 0.487086953813  
ACTACTAT 1.05734184795  
ACTACTCA -0.0241380299396  
ACTACTCC -0.466432782561  
ACTACTCG -0.275414070163  
ACTACTCT 0.155866817639  
ACTACTGA 0.953832836073  
ACTACTGC -0.085310300038  
ACTACTGG 0.0935972413468  
ACTACTTA 0.382145260995  
ACTACTTC 0.739750083994  
ACTACTTG 1.44873270991  
ACTAGAAA 1.12131182208  
ACTAGAAC 0.207763717324  
ACTAGAAG 0.589041708807  
ACTAGAAT 2.55450092225  
ACTAGACA 0.821549878561  
ACTAGACC 0.00279791220613  
ACTAGACG -0.806322074836



ACTAGACT 0.520022793852  
ACTAGAGA -0.387941144458  
ACTAGAGC -0.244103683881  
ACTAGAGG 0.489849059404  
ACTAGAGT -0.354600398224  
ACTAGATA 1.87165837402  
ACTAGATC 0.987197106419  
ACTAGATG -0.143360524798  
ACTAGCAA 0.323089536537  
ACTAGCAC -0.910409821532  
ACTAGCAG 0.216362301086  
ACTAGCAT -0.0545343066606  
ACTAGCCA -0.8415108171  
ACTAGCCC -0.455105401686  
ACTAGCCG -0.618474329605  
ACTAGCCT 0.303791228544  
ACTAGCGA -0.00649369608972  
ACTAGCGC -1.3294284011  
ACTAGCGG 0.0112634702316  
ACTAGCTA -0.236979416655  
ACTAGCTC 0.0941782661211  
ACTAGCTG -0.85605912786  
ACTAGGAA 0.47771727877  
ACTAGGAC -0.0592108170622  
ACTAGGAG -0.273903947013  
ACTAGGAT 2.01682588378  
ACTAGGCA -0.190327561466  
ACTAGGCC -0.690344866688  
ACTAGGCG -0.489324242687  
ACTAGGCT -0.236990241911  
ACTAGGGA -0.546780327459  
ACTAGGGC -0.823418484213  
ACTAGGGG -0.828284852942  
ACTAGGTA 0.524658085011  
ACTAGGTC -0.287369732217  
ACTAGGTG -0.221209101085  
ACTAGTAA 1.3930192831  
ACTAGTAC 0.228549040711  
ACTAGTAG 0.691128656826  
ACTAGTAT 0.289534158795  
ACTAGTCA -1.15899037312  
ACTAGTCC -0.637671463094  
ACTAGTCG -1.15412379621  
ACTAGTCT 0.00440400541077  
ACTAGTGA -0.0176809731764  
ACTAGTGC -0.681422357971  
ACTAGTGG 0.566391526973  
ACTAGTTA 0.366458632978  
ACTAGTTC -0.444286599644  
ACTAGTTG 0.466125720024  
ACTATAAA 1.13864513801  
ACTATAAC -0.196673034826  
ACTATAAG 0.282428003054  
ACTATAAT 2.78783181142

ACTATACA 0.451065915939  
ACTATACC 0.10068445289  
ACTATACG 1.61150395881  
ACTATACT 0.805599697206  
ACTATAGA 0.147287386252  
ACTATAGC -0.152009487634  
ACTATAGG 0.999589109543  
ACTATAGT 0.490702172813  
ACTATATA 1.60537249243  
ACTATATC 1.99740537531  
ACTATATG 0.399184629602  
ACTATCAA 0.472568412505  
ACTATCAC 0.630365456481  
ACTATCAG 0.470493086108  
ACTATCAT 1.89535881382  
ACTATCCA 1.68577749445  
ACTATCCC 0.151881666347  
ACTATCCG 0.87580647578  
ACTATCCT 1.10581192972  
ACTATCGA 2.40691251062  
ACTATCGC -0.450489679258  
ACTATCGG 0.730576720797  
ACTATCTA 0.829266620351  
ACTATCTC 0.830919137247  
ACTATCTG 1.6153150733  
ACTATGAA -0.110959702196  
ACTATGAC -0.31278847316  
ACTATGAG -0.163377255039  
ACTATGAT 1.61064980451  
ACTATGCA 1.08040297314  
ACTATGCC 0.23882595544  
ACTATGCG 1.12000758696  
ACTATGCT 1.27270822553  
ACTATGGA -0.330510873757  
ACTATGGC -0.280286059699  
ACTATGGG 0.269466841301  
ACTATGTA 0.547336787231  
ACTATGTC -0.729443816167  
ACTATGTG 1.04064409943  
ACTATTAA 0.881296337595  
ACTATTAC 1.2208939725  
ACTATTAG 0.686043076671  
ACTATTAT 1.90694787443  
ACTATTCA -0.0850386277591  
ACTATTCC 0.83870499413  
ACTATTCT 0.279397347853  
ACTATTCT 0.435823747933  
ACTATTGA 1.17734126307  
ACTATTGC 0.000939715453755  
ACTATTGG 0.172092834832  
ACTATTTA 0.867055922085  
ACTATTTT 0.046365402273  
ACTATTTG 1.53130047309  
ACTCAAAA 0.992737347308

ACTCAAAC 0.580505994799  
ACTCAAAG -0.67020135605  
ACTCAAAT 2.54545912754  
ACTCAACA 0.823184908506  
ACTCAACC -0.286662967935  
ACTCAACG -0.191298919975  
ACTCAACT 0.406185447279  
ACTCAAGA -0.528838715437  
ACTCAAGC -0.994739811408  
ACTCAAGG 0.543238178933  
ACTCAAGT -0.649623586122  
ACTCAATA 1.21014157924  
ACTCAATC 0.262176448038  
ACTCAATG -0.405661463274  
ACTCACAA -0.116746634005  
ACTCACAC -0.594904001049  
ACTCACAG -0.217126106137  
ACTCACAT 1.45164512001  
ACTCACCA -0.152897783123  
ACTCACCC -1.13961170842  
ACTCACCG -0.177956792498  
ACTCACCT -0.348395445009  
ACTCACGA -0.445689511129  
ACTCACGC -0.790729543271  
ACTCACGG 2.26749924872  
ACTCACTA 0.987210846167  
ACTCACTC -0.205889699045  
ACTCACTG -0.302305670397  
ACTCAGAA 1.32049298535  
ACTCAGAC -0.0296859734138  
ACTCAGAG 0.0673203907222  
ACTCAGAT 2.32567542117  
ACTCAGCA -1.00565125266  
ACTCAGCC -0.580484760643  
ACTCAGCG -1.05088499937  
ACTCAGCT -0.292708248631  
ACTCAGGA -0.153555001043  
ACTCAGGC -0.457526928084  
ACTCAGGG -0.577573183254  
ACTCAGTA 0.38022419449  
ACTCAGTC -0.365031781024  
ACTCAGTG -0.633056781556  
ACTCATAA 1.11135154607  
ACTCATAC -0.635955243732  
ACTCATAG -0.514534805639  
ACTCATAT 1.17066374582  
ACTCATCA 0.135558846387  
ACTCATCC 0.0417563415406  
ACTCATCG -0.480143801439  
ACTCATCT -0.51359467383  
ACTCATGA 0.981567973528  
ACTCATGC -0.310244329926  
ACTCATGG -0.220221504693  
ACTCATT 1.76296031752

ACTCATTC -0.0712114455618  
ACTCATTG 0.363137361301  
ACTCCAAA 1.04578130773  
ACTCCAAC -0.525079853622  
ACTCCAAG -0.338321295643  
ACTCCAAT 1.21172831189  
ACTCCACA 0.136712985172  
ACTCCACC -0.389124636339  
ACTCCACG -0.0395942049206  
ACTCCACT -0.736563087121  
ACTCCAGA -0.343106683134  
ACTCCAGC -1.04933573875  
ACTCCAGG -0.275652642141  
ACTCCAGT -0.768502587294  
ACTCCATA 0.948850928558  
ACTCCATC -0.384043427922  
ACTCCATG -0.772537493125  
ACTCCCAA -0.0529242580741  
ACTCCCAC -1.46685044051  
ACTCCCAG -1.27107361194  
ACTCCCAT -0.726542855855  
ACTCCCCA -0.952382876362  
ACTCCCCC -0.81375132282  
ACTCCCCG -1.1721253635  
ACTCCCCCT -0.929408353217  
ACTCCCCGA 0.686858718042  
ACTCCCCGC -0.435824164289  
ACTCCCCGG -0.367527418786  
ACTCCCTA -0.912442887797  
ACTCCCTC -0.608365622693  
ACTCCCTG -1.20149823721  
ACTCCGAA -0.285815267154  
ACTCCGAC -0.503193476839  
ACTCCGAG 0.294540006779  
ACTCCGAT 0.641199663694  
ACTCCGCA -0.73876998201  
ACTCCGCC -0.97379918724  
ACTCCGCG 0.160006437  
ACTCCGCT -0.547418184825  
ACTCCGGA -0.910973151177  
ACTCCGGC -1.13815820969  
ACTCCGGG -0.439790787739  
ACTCCGTA 1.22213887689  
ACTCCGTC 0.0614945296293  
ACTCCGTG -0.697941697955  
ACTCCTAA -0.608761160877  
ACTCCTAC -1.13335096351  
ACTCCTAG -0.986393123016  
ACTCCTAT 0.123716016805  
ACTCCTCA -0.528924901126  
ACTCCTCC -0.4200786219  
ACTCCTCG -0.401845144334  
ACTCCTCT 0.799824839721  
ACTCCTGA -0.131840371102

ACTCCTGC -0.671431479802  
ACTCCTGG -0.447165909445  
ACTCCTTA 1.04344117892  
ACTCCTTC -1.04416605469  
ACTCCTTG -0.286952959878  
ACTCGAAA 0.469571898495  
ACTCGAAC -0.273066030597  
ACTCGAAG 0.157833475124  
ACTCGAAT 1.56369858937  
ACTCGACA -0.56213491158  
ACTCGACC -0.0322478117776  
ACTCGACG -0.655547499049  
ACTCGACT -0.294225033478  
ACTCGAGA -0.59898970231  
ACTCGAGC -0.80339051236  
ACTCGAGG 0.418161718954  
ACTCGAGT 0.263114914424  
ACTCGATA 0.845274675187  
ACTCGATC -0.310168553137  
ACTCGATG -0.55629322896  
ACTCGCAA 1.33706291258  
ACTCGCAC -1.01369400118  
ACTCGCAG 0.0728518881351  
ACTCGCAT 0.711735155318  
ACTCGCCA -0.507607682971  
ACTCGCCC -0.579357684997  
ACTCGCCG -0.862930250648  
ACTCGCCT -0.836422946987  
ACTCGCGA 0.530161894751  
ACTCGCGC -0.376021080841  
ACTCGCGG -0.142983930811  
ACTCGCTA 0.4560492807  
ACTCGCTC 0.22497629002  
ACTCGCTG -0.292669111169  
ACTCGGAA 0.132151180844  
ACTCGGAC -1.06005065998  
ACTCGGAG -0.776797855722  
ACTCGGAT 2.20649539462  
ACTCGGCA -0.992333690182  
ACTCGGCC 0.302653743999  
ACTCGGCG -0.315397151572  
ACTCGGCT -0.127627056732  
ACTCGGGA -0.645916560627  
ACTCGGGC -1.49948671242  
ACTCGGGG 0.00442961130372  
ACTCGGTA -0.431271519792  
ACTCGGTC -0.745290116704  
ACTCGGTG -0.303796016638  
ACTCGTAA 1.26567618115  
ACTCGTAC 0.177562295204  
ACTCGTAG 0.0612642847707  
ACTCGTAT 0.81602337742  
ACTCGTCA -0.800538890232  
ACTCGTCC -0.329389210739

ACTCGTCG -0.191645744508  
ACTCGTCT -0.389047194127  
ACTCGTGA -0.129596212354  
ACTCGTGC -0.665114110471  
ACTCGTGG -0.0715428649244  
ACTCGTTA 0.0101311901357  
ACTCGTTC -0.588727776396  
ACTCGTTG -0.01336773337  
ACTCTAAA 0.830929962503  
ACTCTAAC 0.803875150724  
ACTCTAAG -0.748073872807  
ACTCTAAT 1.8020016017  
ACTCTACA 0.757756231193  
ACTCTACC 0.624753394186  
ACTCTACG -0.477308417195  
ACTCTACT 0.814116675195  
ACTCTAGA 0.14068918481  
ACTCTAGC -0.568749350905  
ACTCTAGG 0.556164366783  
ACTCTATA 0.463420447024  
ACTCTATC -0.196012902415  
ACTCTATG -0.654865507948  
ACTCTCAA -0.231077362418  
ACTCTCAC -0.0406282250045  
ACTCTCAG -1.09063200693  
ACTCTCAT 0.581762973511  
ACTCTCCA 0.171104405728  
ACTCTCCC -0.91984528082  
ACTCTCCG -0.729589332583  
ACTCTCCT -0.912975615278  
ACTCTCGA -0.48316508863  
ACTCTCGC -0.288754324038  
ACTCTCGG -0.234726930787  
ACTCTCTA 0.583419862146  
ACTCTCTC -0.196256054309  
ACTCTCTG -1.05785250857  
ACTCTGAA -0.551293418137  
ACTCTGAC -0.835712435502  
ACTCTGAG -0.00642478917452  
ACTCTGAT 1.75549796924  
ACTCTGCA -0.182552113482  
ACTCTGCC 1.29307032306  
ACTCTGCG 0.949813335413  
ACTCTGCT 0.17184010675  
ACTCTGGA -1.12589985683  
ACTCTGGC -1.02654462042  
ACTCTGGG -0.161486998876  
ACTCTGTA -0.273353524403  
ACTCTGTC -0.729921584658  
ACTCTGTG -0.0573297207308  
ACTCTTAA -0.0984777661802  
ACTCTTAC -0.0552733385305  
ACTCTTAG -0.275165921997  
ACTCTTAT 1.38899936609

ACTCTTCA -0.362756395577  
ACTCTTCC -0.4582134991  
ACTCTTCG 0.357813417346  
ACTCTTCT -0.344647824806  
ACTCTTGA -0.074377832813  
ACTCTTGC -0.513208503655  
ACTCTTGG 0.503615661806  
ACTCTTTA 1.60372830265  
ACTCTTTC 0.139625395274  
ACTCTTTG 0.181228101456  
ACTGAAAA 2.28137410368  
ACTGAAAC 0.716821776363  
ACTGAAAG -0.228174320326  
ACTGAAAT 3.13920461807  
ACTGAACA 0.352031481809  
ACTGAACC -0.00454390102107  
ACTGAACG 0.168663726956  
ACTGAACT 0.615216760394  
ACTGAAGA 0.00109501623544  
ACTGAAGC -0.404705926293  
ACTGAAGG -0.267836391272  
ACTGAAGT -0.937559146119  
ACTGAATA 1.81395934553  
ACTGAATC 1.68891057322  
ACTGAATG 0.21154631143  
ACTGACAA 0.184810428335  
ACTGACAC -0.0391114401582  
ACTGACAG -0.744267962766  
ACTGACAT -0.223330851175  
ACTGACCA -0.292757170459  
ACTGACCC -0.973388660241  
ACTGACCG -0.803247494079  
ACTGACCT -1.07143383255  
ACTGACGA 0.899802736508  
ACTGACGC -0.211750742218  
ACTGACGG 0.184116362911  
ACTGACTA -0.0798144010617  
ACTGACTC -0.373959286013  
ACTGACTG -0.980489611532  
ACTGAGAA 1.27654286413  
ACTGAGAC 0.104599031843  
ACTGAGAG -0.852417262076  
ACTGAGAT 1.77531984488  
ACTGAGCA -0.63089422858  
ACTGAGCC -0.667719874391  
ACTGAGCG -0.243285544375  
ACTGAGCT 0.085212040026  
ACTGAGGA -0.677366217985  
ACTGAGGC -0.808654917409  
ACTGAGGG -0.129335781686  
ACTGAGTA 0.246530831085  
ACTGAGTC -1.37034016453  
ACTGAGTG -0.295657714415  
ACTGATAA 0.315721492883

ACTGATAC 2.43050865325  
ACTGATAG 0.112456710133  
ACTGATAT 3.24615377126  
ACTGATCA 0.162157748365  
ACTGATCC -0.315320958427  
ACTGATCG 1.98961535487  
ACTGATCT 0.115468837493  
ACTGATGA -0.287309568777  
ACTGATGC 0.12601346912  
ACTGATGG -0.384454371277  
ACTGATTA 2.86302507743  
ACTGATTC 2.22140780869  
ACTGATTG 2.25703622287  
ACTGCAAA 0.343815737373  
ACTGCAAC -0.0377189375729  
ACTGCAAG -0.727272311537  
ACTGCAAT 1.0355601847  
ACTGCACA -0.25805202567  
ACTGCACC -0.944592231385  
ACTGCACG 0.322492273879  
ACTGCACT -0.0772914919824  
ACTGCAGA 0.207156670301  
ACTGCAGC -0.832551252701  
ACTGCAGG -0.315227278331  
ACTGCAGT -0.675724318165  
ACTGCATA 0.459931592064  
ACTGCATC -0.0135178297019  
ACTGCATG -0.956176920258  
ACTGCCAA -0.679133649133  
ACTGCCAC -0.338321295643  
ACTGCCAG -0.622110574583  
ACTGCCAT -0.0596421618607  
ACTGCCCA -0.838685425399  
ACTGCCCC -1.20055706451  
ACTGCCCG -0.705235422066  
ACTGCCCT -1.15853258972  
ACTGCCGA 0.498230097165  
ACTGCCGC -1.07898611373  
ACTGCCGG 0.388575879154  
ACTGCCTA -0.549662551752  
ACTGCCTC -0.947350589773  
ACTGCCTG -0.401316372235  
ACTGCGAA 0.488861463012  
ACTGCGAC -0.106156619576  
ACTGCGAG -0.533198795292  
ACTGCGAT 0.81380524092  
ACTGCGCA -0.365688582587  
ACTGCGCC 0.623364430626  
ACTGCGCG 0.210456083289  
ACTGCGCT 0.111323597325  
ACTGCGGA -0.747015912254  
ACTGCGGC -0.859772190517  
ACTGCGGG 1.17519578069  
ACTGCGTA -0.465872367408



ACTGCGTC -0.442043689964  
ACTGCGTG -0.758554801968  
ACTGCTAA 0.369284024679  
ACTGCTAC -0.48581332086  
ACTGCTAG -0.404816885163  
ACTGCTAT 0.490209623685  
ACTGCTCA -0.221217011849  
ACTGCTCC -0.669688613657  
ACTGCTCG -0.171601951128  
ACTGCTCT -0.286803279902  
ACTGCTGA 0.00958867828976  
ACTGCTGC -0.703100348585  
ACTGCTGG -0.107197717711  
ACTGCTTA 0.519953054225  
ACTGCTTC -1.05205204519  
ACTGCTTG 0.323978248383  
ACTGAAA 1.66190489145  
ACTGGAAC 0.204686638432  
ACTGGAAG -0.333925409174  
ACTGGAAT 2.35721438688  
ACTGGACA -0.670140776255  
ACTGGACC -0.572986189389  
ACTGGACG 0.416188816128  
ACTGGACT -0.404450700076  
ACTGGAGA 0.843826589078  
ACTGGAGC -0.266532780689  
ACTGGAGG -0.297588565287  
ACTGGATA 2.52098239201  
ACTGGATC 0.76897244502  
ACTGGATG -0.278128711173  
ACTGGCAA 0.903476453524  
ACTGGCAC -1.32377262143  
ACTGGCAG -1.198433649  
ACTGGCAT -0.415506200494  
ACTGGCCA -1.29674279101  
ACTGGCCC -0.497481697286  
ACTGGCCG -0.741388444787  
ACTGGCCT -1.23679252572  
ACTGGCGA 0.212440227726  
ACTGGCGC -0.785162031065  
ACTGGCGG -0.34808859065  
ACTGGCTA -0.146393678134  
ACTGGCTC -1.16765036939  
ACTGGCTG -0.829135884572  
ACTGGGAA -0.0972965642562  
ACTGGGAC -0.408394007591  
ACTGGGAG -0.973182564029  
ACTGGGAT 1.38625016753  
ACTGGGCA -1.58668102328  
ACTGGGCC -0.710375753033  
ACTGGGCG -1.11574389352  
ACTGGGCT -0.777793779233  
ACTGGGGA -0.646913108672  
ACTGGGGC -0.949354927475

ACTGGGGG -0.709439576605  
ACTGGGTA 0.554499983741  
ACTGGGTC -1.35855583296  
ACTGGGTG -1.02861016245  
ACTGGTAA 1.19732655844  
ACTGGTAC -1.11781422364  
ACTGGTAG -0.666809720212  
ACTGGTAT -0.072336855784  
ACTGGTCA -0.602608252159  
ACTGGTCC -0.710277076665  
ACTGGTCG -0.864190560209  
ACTGGTCT -0.484564669267  
ACTGGTGA 0.0637212014267  
ACTGGTGC -0.348038419754  
ACTGGTGG -0.419031486602  
ACTGGTTA -0.108066236292  
ACTGGTTC -1.09496231734  
ACTGGTTG 0.136120094252  
ACTGTAAG 1.52007759756  
ACTGTAAC 0.388719521968  
ACTGTAAG -0.675747009566  
ACTGTAAT 2.99029448437  
ACTGTACA -0.0320535817115  
ACTGTACC -0.547193144416  
ACTGTACG 0.455369163201  
ACTGTACT 0.467177227059  
ACTGTAGA 0.770667638405  
ACTGTAGC 0.67270552911  
ACTGTAGG -0.376331266048  
ACTGTATA 1.04554065397  
ACTGTATC -0.00273171160482  
ACTGTATG -0.166868191779  
ACTGTCAA 0.202492234223  
ACTGTCAC -0.916488202529  
ACTGTCAG -0.796352847178  
ACTGTCAT -0.200530364831  
ACTGTCCA -0.213895808243  
ACTGTCCC 0.0345912714282  
ACTGTCCG 0.0991047982906  
ACTGTCCT -0.103889769426  
ACTGTCGA -0.0346812043205  
ACTGTCGC 0.237328739325  
ACTGTCGG -0.243272220983  
ACTGTCTA 1.58925118876  
ACTGTCTC -0.653248797666  
ACTGTCTG 0.588051822457  
ACTGTGAA 1.21255561123  
ACTGTGAC 0.0722827295062  
ACTGTGAG -0.808895571168  
ACTGTGAT 2.45301040418  
ACTGTGCA -0.433307500549  
ACTGTGCC -0.0839944069536  
ACTGTGCG -0.177656183478  
ACTGTGCT 0.0364561298763

ACTGTGGA -0.148851011146  
ACTGTGGC 0.124085324562  
ACTGTGGG -0.666977095317  
ACTGTGTA 0.00777836247544  
ACTGTGTC -0.917757255565  
ACTGTGTG 0.304621442375  
ACTGTTAA 1.17454772261  
ACTGTTAC 0.449491465789  
ACTGTTAG 0.429584861705  
ACTGTTAT 0.765653671479  
ACTGTTCA -0.284915521875  
ACTGTTCC 0.313567267026  
ACTGTTCCG 0.97493313276  
ACTGTTCT 0.438324590145  
ACTGTTGA 0.2808062965  
ACTGTTGC -0.0626186907835  
ACTGTTGG -0.309291707436  
ACTGTTTA 0.309414948807  
ACTGTTTC -0.680173706378  
ACTGTTTG 0.294814801728  
ACTTAAAA 1.00853160335  
ACTTAAAC 0.860157527979  
ACTTAAAG -0.256274601978  
ACTTAAAT 1.2862452076  
ACTTAAACA 1.28992621085  
ACTTAAACC 0.361505245847  
ACTTAAACG 0.539437056986  
ACTTAACT 0.253168586345  
ACTTAAAGA 0.354210689024  
ACTTAAAGC -0.0805765406887  
ACTTAAAGG -0.183485999952  
ACTTAAAGT -0.439059458455  
ACTTAAATA 1.61917073789  
ACTTAAATC 0.272727325005  
ACTTAAATG 1.33689199845  
ACTTACAA 0.644148713122  
ACTTACAC 0.18517890338  
ACTTACAG -0.392938040788  
ACTTACAT 0.616280966287  
ACTTACCA 0.276310068239  
ACTTACCC -0.503141848697  
ACTTACCG -0.535506864684  
ACTTACCT -0.0433480704638  
ACTTACGA 2.82722075285  
ACTTACGC 0.138278691846  
ACTTACGG 0.527106258192  
ACTTACTA 1.09277832203  
ACTTACTC -0.210591190805  
ACTTACTG 0.547221664801  
ACTTAGAA 0.106158493178  
ACTTAGAC 0.352596060522  
ACTTAGAG -0.318018528841  
ACTTAGAT 0.886409189067  
ACTTAGCA -0.63914473874

ACTTAGCC -0.781185831427  
ACTTAGCG 0.847554224194  
ACTTAGCT 0.527011745384  
ACTTAGGA 0.553544030404  
ACTTAGGC -0.260223322121  
ACTTAGGG -0.996080061318  
ACTTAGTA 0.807880495281  
ACTTAGTC -0.190002803799  
ACTTAGTG 0.14201173959  
ACTTATAA 0.939513521104  
ACTTATAC 1.0805149729  
ACTTATAG 0.930723829945  
ACTTATAT 0.526576653381  
ACTTATCA 0.432152945408  
ACTTATCC 0.513497454708  
ACTTATCG 1.01655311772  
ACTTATCT 0.721049871371  
ACTTATGA 1.75109292294  
ACTTATGC 0.386168092504  
ACTTATGG -0.284897410389  
ACTTATTA 0.597733139953  
ACTTATTC 0.509592660121  
ACTTATTG 2.9276889088  
ACTTCAAA 1.4474936345  
ACTTCAAC 0.00486116428016  
ACTTCAAG -0.799858148199  
ACTTCAAT 0.648543558702  
ACTTCACA 0.423479833925  
ACTTCACC 0.0704430605951  
ACTTCACG -0.570250106046  
ACTTCACT -0.0176809731764  
ACTTCAGA 0.632364381556  
ACTTCAGC -0.454433194951  
ACTTCAGG -0.0582444548256  
ACTTCATA 0.858147569471  
ACTTCATC -0.401184803745  
ACTTCATG -0.322351961913  
ACTTCCAA 0.811835668942  
ACTTCCAC -0.408196238499  
ACTTCCAG -0.772832897695  
ACTTCCAT -0.48174302477  
ACTTCCCA 0.152699805853  
ACTTCCCC -0.771921494448  
ACTTCCCG -0.36596816563  
ACTTCCCT -0.300555518022  
ACTTCCGA 1.70085312006  
ACTTCCGC -0.48214522465  
ACTTCCGG 0.00967028406244  
ACTTCCTA 0.175275668145  
ACTTCCTC 0.0252863397409  
ACTTCCTG -0.414721369466  
ACTTCGAA 0.541760323371  
ACTTCGAC -0.154883592985  
ACTTCGAG -0.340289618553

ACTTCGAT 1.45182415308  
ACTTCGCA 1.21377116252  
ACTTCGCC -1.13450114691  
ACTTCGCG -0.277692370102  
ACTTCGCT 0.187660385039  
ACTTCGGA -0.433511098625  
ACTTCGGC -0.631527922386  
ACTTCGGG -0.317951703706  
ACTTCGTA -0.156924986369  
ACTTCGTC -0.570283622703  
ACTTCGTG -0.0532569265046  
ACTTCTAA 1.7842773275  
ACTTCTAC -0.253746072093  
ACTTCTAG -0.46246824089  
ACTTCTAT 0.194448652986  
ACTTCTCA 0.671020536447  
ACTTCTCC -0.358559319089  
ACTTCTCG 0.351935928111  
ACTTCTCT 0.758553969256  
ACTTCTGA 0.585323649879  
ACTTCTGC -0.427463527971  
ACTTCTGG 0.391275531348  
ACTTCTTA -0.14989544013  
ACTTCTTC -0.38114038583  
ACTTCTTG 0.0667031429773  
ACTTGAAA 1.92688757882  
ACTTGAAC 0.799998876522  
ACTTGAAG -0.0237516515874  
ACTTGAAT 0.824445634423  
ACTTGACA 0.161383742592  
ACTTGACC -1.02571732108  
ACTTGACG 0.0672360786356  
ACTTGACT 0.0991047982906  
ACTTGAGA 0.909960989782  
ACTTGAGC -0.0814608807967  
ACTTGAGG 0.1714991112  
ACTTGATA 1.53811767777  
ACTTGATC -0.392043291781  
ACTTGATG -0.00516406325783  
ACTTGCAA 0.299884560355  
ACTTGCAC 0.0361080562745  
ACTTGCAG -0.959256705464  
ACTTGCAT 1.3664707602  
ACTTGCCA -0.850387526659  
ACTTGCCC -0.785184930645  
ACTTGCCG -0.711708508535  
ACTTG CCT 0.248082381656  
ACTTGCGA 2.08674600126  
ACTTGCGC 0.20280241943  
ACTTGCGG -0.0184635142466  
ACTTGCTA 0.372299274708  
ACTTGCTC -0.0317679615071  
ACTTGCTG 0.976625828009  
ACTTGCAA 0.380374707178

ACTTGGAC -0.458328829707  
ACTTGGAG -0.564031621261  
ACTTGGAT 1.61546121425  
ACTTGGCA -0.603233618846  
ACTTGGCC 0.285526940636  
ACTTGGCG -0.719214990553  
ACTTGGCT 1.09909423411  
ACTTGGGA 0.588418423901  
ACTTGGGC -1.08503555799  
ACTTGGGG -0.114221018611  
ACTTGGTA -0.394453992923  
ACTTGGTC -1.03160605193  
ACTTGGTG -0.73683059584  
ACTTGTA 2.86499631483  
ACTTGTAC 0.320145275203  
ACTTGTAG 0.0673401676314  
ACTTGTAT 0.287732794634  
ACTTGTCA -0.742354807024  
ACTTGTCC 0.291970882185  
ACTTGTCCG -0.54090013191  
ACTTGTCT 0.122952419932  
ACTTGTGA 0.848088825277  
ACTTGTGC -0.301184631912  
ACTTGTGG -0.663039824964  
ACTTGTTA 0.558903364618  
ACTTGTTT -0.567204253852  
ACTTGTTG -0.0403742478548  
ACTTTAAA 0.797532800034  
ACTTTAAC 0.695885523933  
ACTTTAAG 0.691789205594  
ACTTTAAT 0.960845519896  
ACTTTACA 1.27176726101  
ACTTTACC -0.354040399427  
ACTTTACG 1.65560521725  
ACTTTACT 0.807066727512  
ACTTTAGA 1.08203404771  
ACTTTAGC 0.306919727401  
ACTTTAGG 0.109690440982  
ACTTTATA 0.666155624963  
ACTTTATC -0.648033106266  
ACTTTATG 0.76716379463  
ACTTTCAA 0.23882595544  
ACTTTCAC -0.0664816415943  
ACTTTCAG -0.661671262847  
ACTTTCAT 0.862477255339  
ACTTTCCA 0.871554648481  
ACTTTCCC 0.872302423827  
ACTTTCCG -0.354067878922  
ACTTTCCCT -0.165034976385  
ACTTTCGA 0.129928880784  
ACTTTCGC 0.00857110426717  
ACTTTCGG -0.515223874791  
ACTTTCTA 0.395892502844  
ACTTTCTC -0.670456998624

ACTTTCTG 0.939139217075  
ACTTTGAA 0.755146720069  
ACTTTGAC 0.426437210473  
ACTTTGAG 0.185392493999  
ACTTTGAT 0.0334400471351  
ACTTTGCA -0.152843448668  
ACTTTGCC 2.06945203097  
ACTTTGCG -0.111000921438  
ACTTTGCT 0.872109859185  
ACTTTGGA 0.918203172823  
ACTTTGGC 0.564179011279  
ACTTTGGG -0.669887215461  
ACTTTGTA 0.618510552576  
ACTTTGTC -0.120224247353  
ACTTTGTG 0.0117795434726  
ACTTTTAA 0.610166362319  
ACTTTTAC 0.251458404144  
ACTTTTAG -0.0249488832166  
ACTTTTAT 1.86983369392  
ACTTTTCA -0.20714126513  
ACTTTTCC -0.539116462879  
ACTTTTCG 0.939122771014  
ACTTTTCT 0.456803093207  
ACTTTTGA 0.360936919931  
ACTTTTGC -0.26108788532  
ACTTTTGG -0.446500156228  
ACTTTTTA 1.23727799679  
ACTTTTTC -0.301879530048  
ACTTTTTG 2.33906355598  
AGAAAAAA 0.865717337599  
AGAAAAAC 0.810738779105  
AGAAAAAG 0.00543448646883  
AGAAAAAT 3.06665375531  
AGAAAACA 0.364269849575  
AGAAAACC -0.379448523293  
AGAAAACG 0.0336671693238  
AGAAAACT -0.550633285726  
AGAAAAGA 1.53337350952  
AGAAAAGC 0.00857110426717  
AGAAAAGG 0.638485230863  
AGAAAATA 1.93232685338  
AGAAAATC 14.4016964131  
AGAAAATG 1.70782167015  
AGAAACAA -0.631191090396  
AGAAACAC 0.400487407473  
AGAAACAG 0.436718288762  
AGAAACAT 1.14845052959  
AGAAACCA 0.246003932588  
AGAAACCC -1.09705055077  
AGAAACCG 0.472619832469  
AGAAACCT -0.113069794318  
AGAAACGA 0.353406705621  
AGAAACGC 0.571287456978  
AGAAACGG -0.763759043579

AGAAACTA 1.27144729143  
AGAAACTC -0.323303959868  
AGAAACTG -0.0247908761211  
AGAAAGAA 0.0467472007095  
AGAAAGAC 0.353206022037  
AGAAAGAG -0.31180691393  
AGAAAGAT 2.1591911096  
AGAAAGCA -0.949397395785  
AGAAAGCC -1.29580390826  
AGAAAGCG -0.0135436437728  
AGAAAGCT 0.245838222907  
AGAAAGGA 0.569114078746  
AGAAAGGC -0.375351372242  
AGAAAGGG -1.26479163287  
AGAAAGTA 1.71504274015  
AGAAAGTC -0.594346500387  
AGAAAGTG 3.0439844211  
AGAAATAA 1.11218821342  
AGAAATAC 1.02119798506  
AGAAATAG 0.429763062066  
AGAAATAT 7.06430571916  
AGAAATCA 6.1317545028  
AGAAATCC 14.9271322511  
AGAAATCG 6.78053288628  
AGAAATCT 15.3725886029  
AGAAATGA 0.315279739185  
AGAAATGC 0.848254951314  
AGAAATGG -0.337676776581  
AGAAATTA 1.19691436602  
AGAAATTC 0.939566606492  
AGAAATTG 1.27386111524  
AGAACAAA 0.803924072552  
AGAACAAC 0.651448474395  
AGAACAAG -0.138576594552  
AGAACAAT 2.82166031869  
AGAACACA -0.368430494914  
AGAACACC -1.28419756888  
AGAACACG -0.971798388564  
AGAACACT 0.341940678204  
AGAACAGA 1.88485019699  
AGAACAGC -0.0264552591633  
AGAACAGG -0.0592054044345  
AGAACATA 0.237717615813  
AGAACATC 0.00903034491648  
AGAACATG 0.167356785525  
AGAACCAA -0.00533372832093  
AGAACCAC -0.0946348004566  
AGAACCAG -0.900766184253  
AGAACCAT -0.386335675787  
AGAACCCA -0.171743512162  
AGAACCCC -0.348116902856  
AGAACCCG -0.434694590507  
AGAACCCT -0.329024899253  
AGAACCGA 0.072190923012



AGAACCGC -0.321432647902  
AGAACCGG -0.487506016109  
AGAACCTA -0.152048625096  
AGAACCTC -0.494425228014  
AGAACCTG -0.101637491736  
AGAACGAA 0.570852364975  
AGAACGAC -0.391771203146  
AGAACGAG -1.04119181573  
AGAACGAT 0.271637721397  
AGAACGCA -0.654440824846  
AGAACGCC -0.703115961935  
AGAACGCG -0.253007872935  
AGAACGCT -0.549013244596  
AGAACGGA 0.918791067471  
AGAACGGC -1.20231158862  
AGAACGGG -0.418571829597  
AGAACGTA 0.512087881527  
AGAACGTC -0.780184703466  
AGAACGTG 0.722810224467  
AGAATAA 1.93857843846  
AGAATAAC 0.246237508295  
AGAATAG 0.0662393224122  
AGAATAT 0.382564115114  
AGAATACA -0.240045878471  
AGAATACT -1.22906454232  
AGAATACTG -0.63928359346  
AGAATACTT 0.563472871532  
AGAATACTTA 0.300621302267  
AGAATACTTC -0.149541329366  
AGAATACTTG -1.05440716281  
AGAATACTTA 0.800279084098  
AGAATACTTC -0.777665541591  
AGAATACTTG 0.176116915408  
AGAAGAAA -0.766996835881  
AGAAGAAC -0.754543628428  
AGAAGAAG -0.339513322822  
AGAAGAAT 1.5375868239  
AGAAGACA -0.739506515744  
AGAAGACC -0.9983891716  
AGAAGACG -0.939013893924  
AGAAGACT -0.605663472363  
AGAAGAGA 0.250403982617  
AGAAGAGC 0.934543063378  
AGAAGAGG -0.745598220132  
AGAAGATA 1.88333257943  
AGAAGATC 7.14816231228  
AGAAGATG -0.265925525487  
AGAAGCAA 0.127313748855  
AGAAGCAC -0.254261728978  
AGAAGCAG -0.344639914042  
AGAAGCAT -0.0878927480229  
AGAAGCCA -0.660457585157  
AGAAGCCC -1.10743155449  
AGAAGCCG -0.755371760478

AGAAGCCT 0.0573944640862  
AGAAGCGA 0.504338455792  
AGAAGCGC -0.849647453899  
AGAAGCGG -0.62180725925  
AGAAGCTA -0.0640988363033  
AGAAGCTC -0.735047759521  
AGAAGCTG 0.304302930047  
AGAAGGAA 1.03014818145  
AGAAGGAC -0.841250594611  
AGAAGGAG -0.830319168276  
AGAAGGAT 0.512460936488  
AGAAGGCA -1.18675944359  
AGAAGGCC -1.54153845853  
AGAAGGCG -1.04076505084  
AGAAGGCT -1.35661394866  
AGAAGGGA -0.0521308917484  
AGAAGGGC -1.03450909402  
AGAAGGGG -1.22582175374  
AGAAGGTA 0.541825274905  
AGAAGGTC -0.825502554086  
AGAAGGTG 1.2008938965  
AGAAGTAA 1.55811067572  
AGAAGTAC -0.0588250632439  
AGAAGTAG -0.0634060199475  
AGAAGTAT 1.2907458076  
AGAAGTCA -1.07113572167  
AGAAGTCC -0.160503566044  
AGAAGTCG -0.693900130428  
AGAAGTCT 1.18032403734  
AGAAGTGA 0.0384013450291  
AGAAGTGC -0.482590309196  
AGAAGTGG -1.2138375713  
AGAAGTTA 0.765631188256  
AGAAGTTC -0.735035893376  
AGAAGTTG 0.451240369095  
AGAATAAA 1.58207279526  
AGAATAAC 1.05703998986  
AGAATAAG 0.0633564735855  
AGAATAAT 2.22403189227  
AGAATACA 1.26091744044  
AGAATACC 0.369400604354  
AGAATACG 2.341505692  
AGAATACT 0.589696220413  
AGAATAGA 1.72418071308  
AGAATAGC -0.132561499665  
AGAATAGG -0.642988953532  
AGAATATA 2.78707674985  
AGAATATC 10.2047539925  
AGAATATG 1.76458597946  
AGAATCAA 4.27273586372  
AGAATCAC 8.38508515742  
AGAATCAG 5.28514873754  
AGAATCAT 4.68792500913  
AGAATCCA 17.3505622281

AGAATCCC 9.92553775955  
AGAATCCG 14.6151783635  
AGAATCCT 10.1797643064  
AGAATCGA 4.99969361831  
AGAATCGC 6.72726263638  
AGAATCGG 6.08222770955  
AGAATCTA 20.278513233  
AGAATCTC 16.4256548912  
AGAATCTG 16.028171284  
AGAATGAA 0.136653862622  
AGAATGAC -0.457298556827  
AGAATGAG 0.247794887849  
AGAATGAT 1.62616572658  
AGAATGCA 0.198867230857  
AGAATGCC -1.46002178603  
AGAATGCG -0.426481552385  
AGAATGCT -0.604311356308  
AGAATGGA -0.122070994316  
AGAATGGC 1.96178466371  
AGAATGGG -0.799945791134  
AGAATGTA 2.88217932625  
AGAATGTC -0.638632620881  
AGAATGTG 1.04892687718  
AGAATTAA 0.0730584007027  
AGAATTAC 2.8778787853  
AGAATTAG -0.0495680124947  
AGAATTAT 0.743827458136  
AGAATTCA 0.898160212155  
AGAATTCC 1.08348879551  
AGAATTCCG 2.15101262903  
AGAATTCT 4.90978591551  
AGAATTGA 0.526085353321  
AGAATTGC 1.31249353784  
AGAATTGG -0.0715428649244  
AGAATTTA 2.88388617761  
AGAATTTTC 3.79053068381  
AGAATTTG 3.65736338618  
AGACAAAA -0.108973059623  
AGACAAAC 1.193715503  
AGACAAAG -0.921665172822  
AGACAAAT 1.56061130976  
AGACAACA 0.258759414485  
AGACAACC -0.215422377455  
AGACAACG -0.366892475912  
AGACAACCT -0.0596908755107  
AGACAAGA 1.79158125233  
AGACAAGC -0.798777704423  
AGACAAGG -0.386056925456  
AGACAATA -0.54080686817  
AGACAATC 4.13421089731  
AGACAATG 1.2562904764  
AGACACAA 0.865659047761  
AGACACAC 0.0231175414252  
AGACACAG -0.167329514208

AGACACAT 1.26254455963  
AGACACCA -0.187198646253  
AGACACCC -0.494105466619  
AGACACCG 0.245266566142  
AGACACCT -0.0427930679384  
AGACACGA 0.200773516725  
AGACACGC -0.826300708505  
AGACACGG -0.315584511764  
AGACACTA -0.148538952337  
AGACACTC -0.131396535624  
AGACACTG 0.259836319235  
AGACAGAA -0.357347098645  
AGACAGAC -0.452553555866  
AGACAGAG 0.1491522447  
AGACAGAT 2.48260332203  
AGACAGCA 0.180279642527  
AGACAGCC -0.882761702477  
AGACAGCG -0.351317431298  
AGACAGCT -0.119889705321  
AGACAGGA -0.601855064186  
AGACAGGC -0.395711387991  
AGACAGGG -0.407781131584  
AGACAGTA 1.59414253885  
AGACAGTC -0.653248797666  
AGACAGTG 1.94368046468  
AGACATAA -0.337025804002  
AGACATAC 0.50591831857  
AGACATAG 0.125024415482  
AGACATAT 1.09876343928  
AGACATCA 0.00648890799591  
AGACATCC -0.154248858288  
AGACATCG 0.301606192345  
AGACATCT 3.03347351431  
AGACATGA -0.0475391097893  
AGACATGC -0.227740061035  
AGACATGG 0.152875924434  
AGACATTA 0.10202678458  
AGACATTC 0.068038396615  
AGACATTG 0.959317077082  
AGACCAA -0.0213446976493  
AGACCAAC 0.572388510375  
AGACCAAG 0.156294623411  
AGACCAAT 0.263120327052  
AGACCACA -0.239856020142  
AGACCACC -1.23728757298  
AGACCACG -0.951193555496  
AGACCACT -0.904763826224  
AGACCAGA 0.115321447475  
AGACCAGC -0.48424823872  
AGACCAGG -0.321810282779  
AGACCATA -0.652062183114  
AGACCATC -0.67129387415  
AGACCATG -0.654865507948  
AGACCAA -0.137729518305

AGACCCAC -0.501526387483  
AGACCCAG -1.11762145082  
AGACCCAT -0.693329098197  
AGACCCCA -1.3568972789  
AGACCCCC -1.62383788028  
AGACCCCG -1.53371304783  
AGACCCCT -0.749851712855  
AGACCCGA -0.826185586076  
AGACCCGC -1.64804106993  
AGACCCGG -1.27041493677  
AGACCCTA -0.950971429579  
AGACCCTC -0.709975634933  
AGACCCTG -1.11216468931  
AGACCGAA 0.386851332672  
AGACCGAC -0.37584496226  
AGACCGAG -0.921976607097  
AGACCGAT -0.785281108877  
AGACCGCA -0.5815029592  
AGACCGCC -1.77227253544  
AGACCGCG -0.98967733901  
AGACCGCT -0.249916846117  
AGACCGGA -0.227767124174  
AGACCGGC -1.17375206632  
AGACCGGG -1.30602294951  
AGACCGTA -0.281162072687  
AGACCGTC -0.684717399221  
AGACCGTG -0.293323622774  
AGACCTAA -0.0639164723827  
AGACCTAC -0.340512577182  
AGACCTAG -0.309448257286  
AGACCTAT 0.16998066093  
AGACCTCA -1.25780788578  
AGACCTCC -1.37556106038  
AGACCTCG -0.251840618937  
AGACCTCT 0.360936919931  
AGACCTGA -0.234853919362  
AGACCTGC -0.0793601566842  
AGACCTGG -0.70209859609  
AGACCTTA -0.374732667251  
AGACCTTC -1.1249665949  
AGACCTTG -0.117075138875  
AGACGAAA -0.75007196517  
AGACGAAC -0.83625890273  
AGACGAAG -0.396115253295  
AGACGAAT 0.0617006258409  
AGACGACA -0.509212527108  
AGACGACC -1.24014939583  
AGACGACG -1.2521862473  
AGACGACT -0.145052179157  
AGACGAGA 1.06971344963  
AGACGAGC -0.777793779233  
AGACGAGG -0.823976817586  
AGACGATA 0.873343730141  
AGACGATC 1.95658666744

AGACGATG 0.970576175576  
AGACGCAA 0.0768518200643  
AGACGCAC -0.483086397349  
AGACGCAG -0.61555921319  
AGACGCAT -0.14019476208  
AGACGCCA -0.592281791067  
AGACGCCC -1.32230413387  
AGACGCCG -0.931799485628  
AGACGCCT -0.880377231762  
AGACGCGA 0.773144748327  
AGACGCGC -0.407667882757  
AGACGCGG -0.855436883843  
AGACGCTA -0.532799301726  
AGACGCTC -1.01000550353  
AGACGCTG -0.253911781774  
AGACGGAA -0.371300436705  
AGACGGAC -1.18895239055  
AGACGGAG -0.266362074736  
AGACGGAT -0.11701351819  
AGACGGCA -0.954428641485  
AGACGGCC -1.61332280993  
AGACGGCG -1.57762444794  
AGACGGCT -0.892645577159  
AGACGGGA 0.193096328753  
AGACGGGC -0.806322074836  
AGACGGGG -0.89188156393  
AGACGGTA -0.212618428087  
AGACGGTC -1.22392629313  
AGACGGTG -0.319829052834  
AGACGTAA 0.140346940192  
AGACGTAC 0.840960602669  
AGACGTAG -0.943576530964  
AGACGTAT 1.43123160252  
AGACGTCA 0.188204562308  
AGACGTCC -0.296677370218  
AGACGTCCG -0.245724557724  
AGACGTCT 1.35847901528  
AGACGTGA 0.0637434764718  
AGACGTGC -0.208744235665  
AGACGTGG -1.34142778053  
AGACGTTA -0.510160153326  
AGACGTTC -0.105460056016  
AGACGTTG 0.0130806559196  
AGACTAAA -0.455897518944  
AGACTAAC 0.84285523057  
AGACTAAG -0.308777091441  
AGACTAAT -0.12751838782  
AGACTACA -0.425883873371  
AGACTACC -1.13706860608  
AGACTACG -0.402969721844  
AGACTACT 0.496026533125  
AGACTAGA 1.0973586542  
AGACTAGC -0.15131125865  
AGACTAGG -0.245248454657

AGACTATA 1.28064938319  
AGACTATC 0.757195399684  
AGACTATG 0.859877736759  
AGACTCAA -0.0695476870536  
AGACTCAC -0.0896691308246  
AGACTCAG -0.938115814069  
AGACTCAT 1.27481165595  
AGACTCCA 0.0399021001701  
AGACTCCC -1.66167048303  
AGACTCCG -0.387720683965  
AGACTCCT -0.854810892623  
AGACTCGA 0.163617908797  
AGACTCGC -0.441392301028  
AGACTCGG -1.09655425444  
AGACTCTA -0.58730009173  
AGACTCTC -0.832319758774  
AGACTCTG -0.236979416655  
AGACTGAA -0.0922263892726  
AGACTGAC -0.469722203005  
AGACTGAG -0.504151928312  
AGACTGAT 0.309109759872  
AGACTGCA -1.56498866839  
AGACTGCC -0.990233590604  
AGACTGCG -0.654718534286  
AGACTGCT -0.687687266449  
AGACTGGA 0.655994249018  
AGACTGGC -0.0966853536731  
AGACTGGG -0.958774981592  
AGACTGTA 0.0897409522317  
AGACTGTC -0.775374750972  
AGACTGTG 1.21381800257  
AGACTTAA -0.265668425668  
AGACTTAC -0.0533814169435  
AGACTTAG -0.542850551513  
AGACTTAT 1.00338461068  
AGACTTCA -0.780556301181  
AGACTTCC -0.718458471732  
AGACTTCG -0.277692370102  
AGACTTGA -0.435880580525  
AGACTTGC -0.593988850598  
AGACTTGG -1.1416787077  
AGACTTTA 0.458778910525  
AGACTTTC -0.193395688705  
AGACTTTG 1.17458165562  
AGAGAAAA 0.441301743602  
AGAGAAAC 0.582153515424  
AGAGAAAG -0.318352862696  
AGAGAAAT 3.43038775473  
AGAGAACA 0.231723963259  
AGAGAACC -0.672181336928  
AGAGAACG -0.414168656898  
AGAGAACT -1.11051342148  
AGAGAAGA 0.558896286566  
AGAGAAGC -0.368995906339

AGAGAAGG -0.501830119173  
AGAGAATA 2.18046981483  
AGAGAATC 15.2420664148  
AGAGAATG -0.378214027803  
AGAGACAA -0.623695433633  
AGAGACAC 0.0471881216955  
AGAGACAG -1.06244741319  
AGAGACAT 0.151832119985  
AGAGACCA 0.466474418159  
AGAGACCC -1.15127383951  
AGAGACCG -0.104127092336  
AGAGACCT -0.852417262076  
AGAGACGA -0.577789272009  
AGAGACGC -1.13591072009  
AGAGACGG -1.55746823844  
AGAGACTA -0.267879692294  
AGAGACTC -0.0759379186815  
AGAGACTG -0.573036568463  
AGAGAGAA -0.601058991546  
AGAGAGAC -1.2603001927  
AGAGAGAG -0.380948237544  
AGAGAGAT 2.17642845548  
AGAGAGCA -1.04089245577  
AGAGAGCC -1.55743701174  
AGAGAGCG -0.840146002188  
AGAGAGCT -0.318459658005  
AGAGAGGA 0.0981580047852  
AGAGAGGC -1.77151310213  
AGAGAGGG -0.949087626934  
AGAGAGTA 0.640219769888  
AGAGAGTC -0.610237767371  
AGAGAGTG 0.166043598754  
AGAGATAA -0.154930641211  
AGAGATAC 2.2204068889  
AGAGATAG 0.499432533244  
AGAGATAT 6.96034204654  
AGAGATCA 2.45521084555  
AGAGATCC 5.87749423107  
AGAGATCG 4.00788453667  
AGAGATCT 10.003744402  
AGAGATGA -0.788666499375  
AGAGATGC -0.107611575558  
AGAGATGG -0.250772874018  
AGAGATTA 3.12865957009  
AGAGATTC 6.59714431363  
AGAGATTG 4.60085352328  
AGAGCAAA -0.256661604864  
AGAGCAAC -0.631622018838  
AGAGCAAG -0.857610470253  
AGAGCAAT 2.31326967829  
AGAGCACA -0.805994402678  
AGAGCACC -1.13339759538  
AGAGCACG -1.02225969282  
AGAGCACT -0.693476280037



AGAGCAGA -0.0996647970878  
AGAGCAGC -1.84061195743  
AGAGCAGG -1.18898403361  
AGAGCATA -0.292997407862  
AGAGCATC 0.116533459741  
AGAGCATG -0.643861219316  
AGAGCCAA -1.19145469001  
AGAGCCAC -0.881142702237  
AGAGCCAG -1.14722373668  
AGAGCCAT -0.324197667986  
AGAGCCCA -0.456174603851  
AGAGCCCC -1.66734166788  
AGAGCCCG 0.205608034222  
AGAGCCCT -1.37103235635  
AGAGCCGA -0.810072193176  
AGAGCCGC -1.59144496844  
AGAGCCGG -1.41053100757  
AGAGCCTA -0.311891434195  
AGAGCCTC -0.0343641492394  
AGAGCCTG -0.775127435518  
AGAGCGAA -0.0695722520566  
AGAGCGAC -0.915372368494  
AGAGCGAG 0.399361164539  
AGAGCGAT 1.52603835799  
AGAGCGCA -0.666215372046  
AGAGCGCC -0.929624025616  
AGAGCGCG -0.713604385504  
AGAGCGCT 0.150406933455  
AGAGCGGA -0.81601713208  
AGAGCGGC -1.16429620559  
AGAGCGGG -1.22793580125  
AGAGCGTA 0.743777911774  
AGAGCGTC -1.03257741044  
AGAGCGTG -0.463489145761  
AGAGCTAA 0.138133591786  
AGAGCTAC 0.246171724049  
AGAGCTAG 0.656692894358  
AGAGCTAT 0.786729194986  
AGAGCTCA -0.64115344818  
AGAGCTCC -0.927755211786  
AGAGCTCG -1.24304577623  
AGAGCTCT -0.0453555308361  
AGAGCTGA -0.29706999391  
AGAGCTGC -0.521663236425  
AGAGCTGG 0.105708204182  
AGAGCTTA -0.886680861346  
AGAGCTTC -0.50086646325  
AGAGCTTG 0.39750463321  
AGAGGAAA -0.3529528776  
AGAGGAAC -0.922508293688  
AGAGGAAG -0.297059376832  
AGAGGAAT 1.82516993855  
AGAGGACA 0.071649868412  
AGAGGACC -1.41165600144

AGAGGACG -0.758554801968  
AGAGGACT 0.110854780488  
AGAGGAGA 0.29181391598  
AGAGGAGC -1.70512659787  
AGAGGAGG -0.885632060625  
AGAGGATA 3.75838945916  
AGAGGATC 7.00956115273  
AGAGGATG -0.0998942092345  
AGAGGCAA -1.08860685143  
AGAGGCAC -0.706738467165  
AGAGGCAG -1.22073742265  
AGAGGCAT -0.150157119865  
AGAGGCCA -1.00009498206  
AGAGGCCC -1.92076797858  
AGAGGCCG -1.21118101195  
AGAGGCCT -0.75271499295  
AGAGGCCG 0.54096966336  
AGAGGCCG -0.790623164317  
AGAGGCCG -0.797076057521  
AGAGGCTA -0.113176173272  
AGAGGCTC -0.621426709881  
AGAGGCTG -0.852702257747  
AGAGGGAA -0.928423254961  
AGAGGGAC -1.31738738607  
AGAGGGAG -0.949087626934  
AGAGGGAT 0.0886342780288  
AGAGGGCA -0.839690508742  
AGAGGGCC -2.24020190958  
AGAGGGCG -1.32808440399  
AGAGGGCT -1.30120571079  
AGAGGGGA -0.854940379334  
AGAGGGGC -1.15688340367  
AGAGGGGG -1.00092935945  
AGAGGGTA -0.281284273168  
AGAGGGTC -1.73809970177  
AGAGGGTG -0.53117676246  
AGAGGTAA -0.169219145837  
AGAGGTAC 0.475179172697  
AGAGGTAG -0.803296832263  
AGAGGTAT 0.10068445289  
AGAGGTCA -1.06268598517  
AGAGGTCC -0.596929989262  
AGAGGTCC -1.34444990043  
AGAGGTGA -0.637129575782  
AGAGGTGC -0.701457407876  
AGAGGTGG -1.00377057268  
AGAGGTTA -0.164232450228  
AGAGGTTC -0.282251884473  
AGAGGTTG -0.0184158414865  
AGAGTAAA -0.682129746787  
AGAGTAAC -0.0429142275295  
AGAGTAAG -0.074377832813  
AGAGTAAT 1.90752806649  
AGAGTACA -0.29456582085

AGAGTACC -0.728928991994  
AGAGTACG -0.1199126049  
AGAGTACT 0.0303544329446  
AGAGTAGA 1.34483190705  
AGAGTAGC -0.994992955846  
AGAGTAGG -1.00981772698  
AGAGTATA 1.74742649215  
AGAGTATC 3.33778976775  
AGAGTATG 0.799172409895  
AGAGTCAA -0.202753289424  
AGAGTCAC -0.138469174709  
AGAGTCAG -0.67571661558  
AGAGTCAT 0.241188775644  
AGAGTCCA -0.916611027544  
AGAGTCCC -0.74755009698  
AGAGTCCG -1.4323053846  
AGAGTCCT -0.817876369722  
AGAGTCGA 0.971347475034  
AGAGTCGC -0.970064057716  
AGAGTCGG -0.430323893575  
AGAGTCTA -0.4582134991  
AGAGTCTC -0.596096028228  
AGAGTCTG -0.776414808217  
AGAGTGAA -0.24084195111  
AGAGTGAC -0.572090191313  
AGAGTGAG -0.0011941089594  
AGAGTGAT 0.552353252292  
AGAGTGCA 0.0754863806179  
AGAGTGCC -1.39237871942  
AGAGTGCG -0.973143842923  
AGAGTGCT -0.639032322625  
AGAGTGGA 0.299735921269  
AGAGTGGC -0.346496029014  
AGAGTGGG -1.32460574975  
AGAGTGTA 0.760766276772  
AGAGTGTC 0.101218637617  
AGAGTGTG 0.519314780503  
AGAGTTAA -0.303681310565  
AGAGTTAC 0.145783924797  
AGAGTTAG -0.256099316109  
AGAGTTAT 1.11527278672  
AGAGTTCA -0.819577392091  
AGAGTTCC -0.429610675776  
AGAGTTCG -0.29509230299  
AGAGTTGA -0.195124398747  
AGAGTTGC 0.532919836783  
AGAGTTGG -1.24411872559  
AGAGTTTA 0.535258300162  
AGAGTTTC 0.148120722752  
AGAGTTTG 0.501182269263  
AGATAAAA 1.09749542714  
AGATAAAC -0.0758683872323  
AGATAAAG -0.941310097171  
AGATAAAT 1.97702454176

AGATAACA 0.796240431063  
AGATAACC 0.239947202103  
AGATAACG 1.58755120729  
AGATAACT 0.606478072844  
AGATAAGA 1.43964574058  
AGATAAGC -0.634092675242  
AGATAAGG 1.50404102234  
AGATAATA 1.36943688022  
AGATAATC 3.62077048337  
AGATAATG 1.5989993314  
AGATACAA 0.859515923409  
AGATACAC 2.28531761937  
AGATACAG 0.236317410642  
AGATACAT 1.34277427578  
AGATACCA 3.61564743117  
AGATACCC 4.84250237229  
AGATACCG 7.15535964998  
AGATACCT 3.25720406723  
AGATACGA 5.98403951896  
AGATACGC 7.34985951475  
AGATACGG 4.48441936444  
AGATACTA 3.95769178202  
AGATACTC 5.46850941434  
AGATACTG 5.10859006843  
AGATAGAA -0.468789357425  
AGATAGAC -0.659173335127  
AGATAGAG -0.345514261606  
AGATAGAT 2.40193039493  
AGATAGCA 0.848731678914  
AGATAGCC 0.386168092504  
AGATAGCG 2.06347898804  
AGATAGCT 0.957020457479  
AGATAGGA -0.636806899895  
AGATAGGC 0.638793126112  
AGATAGGG -0.270278319112  
AGATAGTA 2.34336014155  
AGATAGTC 0.889398000491  
AGATAGTG 1.58175011937  
AGATATAA 2.24657007434  
AGATATAC 2.6102763861  
AGATATAG 3.10486066209  
AGATATAT 4.69143426553  
AGATATCA 14.9484155362  
AGATATCC 19.4275503024  
AGATATCG 15.6340480859  
AGATATCT 21.128823942  
AGATATGA 3.60798627291  
AGATATGC 9.09750605104  
AGATATGG 7.18967466921  
AGATATTA 5.36973353727  
AGATATTC 11.3181698316  
AGATATTG 4.98447726437  
AGATCAAA 0.856728628281  
AGATCAAC 1.14394118611

AGATCAAG 0.775118275686  
AGATCAAT 2.14234576288  
AGATCACA 2.06701718118  
AGATCACC 1.18303930288  
AGATCACG 2.48223609605  
AGATCACT 1.67286129915  
AGATCAGA 1.4626677283  
AGATCAGC -0.0893860087562  
AGATCAGG 1.01578285915  
AGATCATA 0.868822104165  
AGATCATC 2.12885645357  
AGATCATG 1.20396348099  
AGATCCAA 3.49676738911  
AGATCCAC 4.04850276913  
AGATCCAG 4.39815269471  
AGATCCAT 2.28377960037  
AGATCCCA 1.82384780013  
AGATCCCC 6.57479973708  
AGATCCCG 3.66538365149  
AGATCCCT 3.43610182425  
AGATCCGA 3.89657863447  
AGATCCGC 3.90283084409  
AGATCCGG 3.10139033498  
AGATCCTA 4.84996971684  
AGATCCTC 7.53575538314  
AGATCCTG 3.96021698106  
AGATCGAA 1.25732803551  
AGATCGAC 0.947749875161  
AGATCGAG 1.35006425269  
AGATCGAT 3.65109889406  
AGATCGCA 5.60263891064  
AGATCGCC 4.67945965928  
AGATCGCG 15.438001875  
AGATCGCT 4.9385989986  
AGATCGGA 2.73830585088  
AGATCGGC 1.19835579043  
AGATCGGG 2.91690861969  
AGATCGTA 4.41487396735  
AGATCGTC 4.24816003546  
AGATCGTG 5.00775947459  
AGATCTAA 4.97092279535  
AGATCTAC 3.30906828297  
AGATCTAG 4.57749491174  
AGATCTAT 4.27376218121  
AGATCTCA 8.98220000874  
AGATCTCC 11.7287896783  
AGATCTCG 9.73408520421  
AGATCTGA 5.88625040557  
AGATCTGC 10.2604403562  
AGATCTGG 5.27548365792  
AGATCTTA 4.53532034062  
AGATCTTC 8.373530238  
AGATCTTG 6.34748519186  
AGATGAAA 0.492272251226

AGATGAAC -0.443146408785  
AGATGAAG -0.145052179157  
AGATGAAT 0.429191405301  
AGATGACA -0.700578480396  
AGATGACC 0.364536109226  
AGATGACG -0.434498695017  
AGATGACT 0.174641349804  
AGATGAGA 0.326470138941  
AGATGAGC -0.641040407531  
AGATGAGG -0.265566418452  
AGATGATA 2.38228193155  
AGATGATC 1.77838172678  
AGATGATG 0.272366760723  
AGATGCAA 0.0687091461037  
AGATGCAC 0.23358444997  
AGATGCAG 0.313836649347  
AGATGCAT 0.94284832435  
AGATGCCA -0.703231708898  
AGATGCCC 0.189559176499  
AGATGCCG 1.11382636604  
AGATGCCT -0.179724223646  
AGATGCGA 0.517888969439  
AGATGCGC 0.514363058796  
AGATGCGG 0.811882300812  
AGATGCTA 2.63498128471  
AGATGCTC -0.335232766961  
AGATGCTG 0.225453433977  
AGATGGAA -0.274298860663  
AGATGGAC -0.970900933242  
AGATGGAG -0.20074291456  
AGATGGAT 1.24172197238  
AGATGGCA -0.720567314786  
AGATGGCC -0.648078697247  
AGATGGCG -0.353583240558  
AGATGGCT -0.64770938949  
AGATGGGA -0.288589655247  
AGATGGGC -0.623390452875  
AGATGGGG -0.258519593439  
AGATGGTA -0.270601827711  
AGATGGTC -0.36168427892  
AGATGGTG -0.0557248765941  
AGATGTAA 0.483979897289  
AGATGTAC -0.306706969494  
AGATGTAG 0.70838078334  
AGATGTAT 1.29620527543  
AGATGTCA 0.692643776249  
AGATGTCC 0.203237095077  
AGATGTCCG 1.01698862607  
AGATGTGA 0.230452203909  
AGATGTGC -0.505304609851  
AGATGTGG 0.409205485402  
AGATGTTA 2.58210698935  
AGATGTTC 0.99910946745  
AGATGTTG 1.55091104807

AGATTAAA -0.172733398512  
AGATTAAC -0.0696446979976  
AGATTAAG 1.06381868162  
AGATTAAT 1.45584865001  
AGATTACA 14.2804735359  
AGATTACC 15.8602859346  
AGATTACG 16.2108056278  
AGATTACT 8.46822561825  
AGATTAGA 0.97572816451  
AGATTAGC 2.09820474245  
AGATTAGG 1.87596682573  
AGATTATA 4.8675393148  
AGATTATC 5.02645219281  
AGATTATG 4.88567349146  
AGATTCAA 1.21636714208  
AGATTCAC 3.33680820852  
AGATTCAG 3.05231070805  
AGATTCAT 3.20847792653  
AGATTCCA 10.1834927743  
AGATTCCC 22.948273982  
AGATTCCG 15.7295018586  
AGATTCCT 12.2232661181  
AGATTCGA 7.23959117167  
AGATTCGC 16.2690609079  
AGATTCGG 9.12942764791  
AGATTCTA 9.5677224686  
AGATTCTC 25.4485782623  
AGATTCTG 13.5171756066  
AGATTGAA 0.73754277275  
AGATTGAC 0.73836674124  
AGATTGAG 1.12129912322  
AGATTGAT 1.10137690579  
AGATTGCA 12.3596959812  
AGATTGCC 10.6389041976  
AGATTGCG 30.1083719713  
AGATTGCT 9.5910246639  
AGATTGGA 0.845491804832  
AGATTGGC 2.04380408606  
AGATTGGG 1.12040437421  
AGATTGTA 5.60336253733  
AGATTGTC 6.34186376156  
AGATTGTG 11.1886073441  
AGATTTAA 3.44778477313  
AGATTTAC 4.72365230786  
AGATTTAG 4.52698531019  
AGATTTAT 4.66846119963  
AGATTTCA 11.3082039348  
AGATTTCC 32.9078132448  
AGATTTCG 17.4456215035  
AGATTTGA 2.94814718456  
AGATTTGC 18.7427716988  
AGATTTGG 6.14036620178  
AGATTTTA 10.1184546389  
AGATTTTC 23.8601964249

AGATTTTG 13.9487335793  
AGCAAAA 0.345205533645  
AGCAAAAC 1.11386487897  
AGCAAAAG 0.853286405191  
AGCAAAAT 1.87272507805  
AGCAAACA -0.47369049188  
AGCAAACC 0.0539709770155  
AGCAAACG -0.277797083632  
AGCAAAC 0.511190634384  
AGCAAAGA -0.199366649858  
AGCAAAGC -0.21937713476  
AGCAAAGG -0.35141569131  
AGCAAATA 2.16606035879  
AGCAAATC 7.00055495646  
AGCAAATG 0.662309952925  
AGCAACAA -0.351162130516  
AGCAACAC 0.20270082857  
AGCAACAG -0.65295401763  
AGCAACAT -0.0968319109791  
AGCAACCA -0.223862537765  
AGCAACCC -0.858934482279  
AGCAACCG -0.688680691824  
AGCAACCT -0.445210701749  
AGCAACGA -0.742002153506  
AGCAACGC -0.782914957825  
AGCAACGG -0.55151596041  
AGCAACTA 0.622670781559  
AGCAACTC -0.345278187764  
AGCAACTG 0.0663280062366  
AGCAAGAA -0.068921904011  
AGCAAGAC 0.944293287789  
AGCAAGAG -0.118275493174  
AGCAAGAT 3.03449129651  
AGCAAGCA -0.38345386785  
AGCAAGCC -0.892341637292  
AGCAAGCG 0.0830592714157  
AGCAAGCT -1.49547075079  
AGCAAGGA 0.240566323449  
AGCAAGGC -0.947686589051  
AGCAAGGG -0.362989346749  
AGCAAGTA 2.20099179306  
AGCAAGTC -0.141686773746  
AGCAAGTG 0.574976787344  
AGCAATAA 0.0322694622887  
AGCAATAC 1.74451574747  
AGCAATAG -0.0132151389022  
AGCAATAT 3.0541934698  
AGCAATCA 3.16423344163  
AGCAATCC 6.79946396829  
AGCAATCG 3.26471804365  
AGCAATGA 0.125420786378  
AGCAATGC -0.141835829188  
AGCAATGG 0.200733130195  
AGCAATTA 0.36015541975



AGCAATTC 0.89945112388  
AGCAATTG 1.52609748054  
AGCACAAA 0.388248206995  
AGCACAAC 0.0696805046121  
AGCACAAAG 0.339676950724  
AGCACAAAT 0.73748260931  
AGCACACA -0.861368915712  
AGCACACC -1.04290803509  
AGCACACG -1.40866011196  
AGCACACT -0.485780845094  
AGCACAGA -0.580313221978  
AGCACAGC -1.16006019982  
AGCACAGG -0.489520138178  
AGCACATA 0.89139963188  
AGCACATC -0.933626455681  
AGCACATG 0.132065619689  
AGCACCAA -0.784331400879  
AGCACCCAC -0.220598723214  
AGCACCCAG -0.949303923867  
AGCACCCAT -0.863958858105  
AGCACCCA -0.168234255759  
AGCACCCC -0.37745875805  
AGCACCCG -1.50829451506  
AGCACCCCT -0.560119748622  
AGCACCGA -0.553771152593  
AGCACCGC -0.697533044558  
AGCACCGG -0.739285222539  
AGCACCTA 0.330998426613  
AGCACCTC 0.0719563064155  
AGCACCTG -0.349975932321  
AGCACGAA 0.198261016545  
AGCACGAC -0.122197774713  
AGCACGAG 0.235160149187  
AGCACGAT 0.00998504918563  
AGCACGCA -0.479722449184  
AGCACGCC -0.984050704255  
AGCACGCG 0.476668061693  
AGCACGCT -0.480339905107  
AGCACGGA -0.130115408265  
AGCACGGC -1.05272570917  
AGCACGGG -0.0752546785133  
AGCACGTA 0.556598626074  
AGCACGTC -0.60470085733  
AGCACGTG 0.361652635865  
AGCACTAA -0.488716154774  
AGCACTAC 0.442276016602  
AGCACTAG -0.382275580418  
AGCACTAT 1.53880466515  
AGCACTCA -0.320018702984  
AGCACTCC 0.0761015465828  
AGCACTCG -0.863295186668  
AGCACTGA 0.4916633306  
AGCACTGC -0.817330943384  
AGCACTGG -0.520876948151

AGCACTTA 0.236317410642  
AGCACTTC 0.12820141981  
AGCACTTG -0.733931092774  
AGCAGAAA -0.0865574943853  
AGCAGAAC -0.483463199514  
AGCAGAAG -1.0779610453  
AGCAGAAT 1.59807710289  
AGCAGACA -0.174196681615  
AGCAGACC -0.48499559771  
AGCAGACG 0.318389502022  
AGCAGACT -0.241852447081  
AGCAGAGA 0.606745997919  
AGCAGAGC -0.862377329903  
AGCAGAGG -0.998415818383  
AGCAGATA 1.97757538073  
AGCAGATC 4.49387251886  
AGCAGATG 0.464357247986  
AGCAGCAA -0.629323733812  
AGCAGCAC -0.752935245265  
AGCAGCAG -0.356140290828  
AGCAGCAT -0.200872193093  
AGCAGCCA -0.335374744351  
AGCAGCCC -1.5503620827  
AGCAGCCG -0.778550922589  
AGCAGCCT -1.53396848222  
AGCAGCGA -0.55482349234  
AGCAGCGC -0.792892096247  
AGCAGCGG -0.204944154607  
AGCAGCTA -0.620726399118  
AGCAGCTC -0.748654897581  
AGCAGCTG -0.614612211507  
AGCAGGAA -0.673963340535  
AGCAGGAC -0.984033217304  
AGCAGGAG -1.03278579661  
AGCAGGAT 0.875308722203  
AGCAGGCA -1.49996385638  
AGCAGGCC -1.1338618323  
AGCAGGCG -1.08554975763  
AGCAGGCT -0.94187717402  
AGCAGGGA -0.576857883675  
AGCAGGGC -0.953356108472  
AGCAGGGG -0.486197825611  
AGCAGGTA -0.436789485636  
AGCAGGTC -0.267445016648  
AGCAGGTG -0.683899884249  
AGCAGTAA -0.293133764446  
AGCAGTAC -0.79035440653  
AGCAGTAG -0.494461242806  
AGCAGTAT 3.24527047204  
AGCAGTCA 0.348639013259  
AGCAGTCC -0.672439893993  
AGCAGTCG -1.00658763726  
AGCAGTGA -0.503464316406  
AGCAGTGC -0.954000627534

AGCAGTGG -0.106156619576  
AGCAGTTA 0.659043640238  
AGCAGTTC -0.222916993328  
AGCAGTTG 0.836661935322  
AGCATAAA -0.4508335893  
AGCATAAC -0.101228421982  
AGCATAAG -0.248937993201  
AGCATAAT 0.848983157928  
AGCATACA 0.0861944319681  
AGCATACC -0.548973274422  
AGCATACG -0.599315500867  
AGCATACT -0.312769737141  
AGCATAGA -0.110123034848  
AGCATAGC -1.03025872397  
AGCATAGG -0.69233171744  
AGCATATA 3.94637314462  
AGCATATC 4.30344919552  
AGCATATG -0.0625928767126  
AGCATCAA 0.536487591202  
AGCATCAC 1.59343889724  
AGCATCAG 0.0641254830862  
AGCATCAT 0.916472381001  
AGCATCCA 0.188923609091  
AGCATCCC -0.344237297806  
AGCATCCG -0.361698643202  
AGCATCCT -0.0702871352795  
AGCATCGA -0.117444030276  
AGCATCGC 0.663776775054  
AGCATCGG -0.42459566796  
AGCATCTA 1.81206263585  
AGCATCTC -0.177410533448  
AGCATCTG 0.77365540894  
AGCATGAA -0.614955288837  
AGCATGAC -0.468252466385  
AGCATGAG -0.746192984653  
AGCATGAT -0.0903221851841  
AGCATGCA -0.633660289553  
AGCATGCC -0.728816575879  
AGCATGCG -1.02819984363  
AGCATGCT -0.370593880602  
AGCATGGA 0.555301469008  
AGCATGGC -0.868632037658  
AGCATGGG -0.389814121847  
AGCATGTA 1.45752573191  
AGCATGTC -1.08473765528  
AGCATGTG 0.531170725298  
AGCATTAA 0.0918560406256  
AGCATTAC -0.155416528643  
AGCATTAG -0.0995165743579  
AGCATTAT 1.87846537799  
AGCATTCA 0.0507496307746  
AGCATTCC -0.468224362356  
AGCATTCCG -0.345162232623  
AGCATTGA -0.401014722326

AGCATTGC -0.352278797263  
AGCATTGG -0.473078656763  
AGCATTTA 1.30097754771  
AGCATTTTC 0.877950709093  
AGCATTTTG 0.0160376161113  
AGCCAAAA -0.163291902062  
AGCCAAAC -0.419205107047  
AGCCAAAG -0.549783086809  
AGCCAAAT 0.980422994575  
AGCCAACA 0.573594069124  
AGCCAACC -0.394453992923  
AGCCAACG -1.33103366159  
AGCCAACT -1.09147616869  
AGCCAAGA -0.74032049169  
AGCCAAGC -1.3042892432  
AGCCAAGG -0.758144274969  
AGCCAATA 0.587900477058  
AGCCAATC 0.0820508572247  
AGCCAATG -0.690454368312  
AGCCACAA -0.821630651621  
AGCCACAC -0.286940469198  
AGCCACAG -0.235627925134  
AGCCACAT -0.503085432461  
AGCCACCA -0.5171695063  
AGCCACCC -0.657672996342  
AGCCACCG -1.32509746616  
AGCCACCT -0.974156004318  
AGCCACGA -0.253678206068  
AGCCACGC -1.51221700478  
AGCCACGG -1.02834973178  
AGCCACTA -0.469544627178  
AGCCACTC -1.28338192751  
AGCCACTG -0.462087483344  
AGCCAGAA -0.125263611994  
AGCCAGAC -0.96170737678  
AGCCAGAG -0.491067733367  
AGCCAGAT 1.02692079805  
AGCCAGCA -0.487004098972  
AGCCAGCC -1.76607486845  
AGCCAGCG -0.680186197058  
AGCCAGCT -1.36231198846  
AGCCAGGA -0.10092802114  
AGCCAGGC -1.83945198966  
AGCCAGGG -1.42930429067  
AGCCAGTA -0.508906921817  
AGCCAGTC -0.451534732775  
AGCCAGTG -0.339974437074  
AGCCATAA -0.192733266336  
AGCCATAC -0.237115565062  
AGCCATAG -0.813906623602  
AGCCATAT 1.39149708563  
AGCCATCA -0.42011068131  
AGCCATCC -0.807587380669  
AGCCATCG -0.966157805883

AGCCATGA -0.326870257041  
AGCCATGC -0.826285095156  
AGCCATGG -0.451341543599  
AGCCATTA 0.176703560989  
AGCCATTC 0.703014995609  
AGCCATTG -0.506907996742  
AGCCCAAA 0.155117585047  
AGCCCAAC -1.03230469727  
AGCCCAAG -0.918881416719  
AGCCCAAT -0.748931566132  
AGCCCACA -0.563390016691  
AGCCCACC -1.12671653909  
AGCCCACG -1.64091388821  
AGCCCACT -1.16130468785  
AGCCCAGA -0.62587755534  
AGCCCAGC -1.63044919693  
AGCCCAGG -1.88479836067  
AGCCCATA 0.0781262857284  
AGCCCATC -0.603129946206  
AGCCCATG -1.05360380394  
AGCCCAA -0.547876592763  
AGCCCCAC -0.86270729202  
AGCCCCAG -1.32652556719  
AGCCCCAT -0.54061825891  
AGCCCCCA -1.46994063462  
AGCCCCCC -1.6709198312  
AGCCCCCG -1.62423029579  
AGCCCCCT -0.921188445222  
AGCCCCGA -1.10774569508  
AGCCCCGC -1.22641610191  
AGCCCCGG -1.17353993295  
AGCCCCTA 0.0919917726761  
AGCCCCTC -0.839201290462  
AGCCCCTG -1.23013749168  
AGCCCGAA -0.474125167526  
AGCCCGAC -0.840561109103  
AGCCCGAG -1.11906100163  
AGCCCGAT -0.0995532136844  
AGCCCGCA -0.745025730655  
AGCCCGCC -0.806418253068  
AGCCCGCG -1.20186921039  
AGCCCGCT -1.42473894732  
AGCCCGGA -0.459344738306  
AGCCCGGC -1.29844589515  
AGCCCGGG -0.677411600787  
AGCCCGTA 0.407771971753  
AGCCCGTC -0.71099487438  
AGCCCGTG -0.83614898475  
AGCCCTAA -1.37363041768  
AGCCCTAC -0.331000300215  
AGCCCTAG -0.869911291416  
AGCCCTAT -0.722634105886  
AGCCCTCA -0.606747455165  
AGCCCTCC -1.85189811906

AGCCCTCG -1.27860923888  
AGCCCTGA -0.298112549291  
AGCCCTGC -1.18756196975  
AGCCCTGG -1.18424090625  
AGCCCTTA -1.04323570725  
AGCCCTTC -1.19492168628  
AGCCCTTG -0.91632332556  
AGCCGAAA -0.0761381859093  
AGCCGAAC -0.154465987934  
AGCCGAAG -0.392541669892  
AGCCGAAT 0.247986619779  
AGCCGACA -0.398869448123  
AGCCGACC -0.503114369202  
AGCCGACG -0.417391460385  
AGCCGACT -0.58017519997  
AGCCGAGA -0.481030639683  
AGCCGAGC -0.892687004579  
AGCCGAGG -0.868273763335  
AGCCGATA 2.59238307137  
AGCCGATC 0.199306070063  
AGCCGATG -0.578161910614  
AGCCGCAA -0.370523100084  
AGCCGCAC -0.0928496741792  
AGCCGCAG -0.697267617619  
AGCCGCAT -0.735961244548  
AGCCGCCA -1.04530541284  
AGCCGCCC -1.21480872163  
AGCCGCCG -1.18826123962  
AGCCGCCT -0.354000012897  
AGCCGCGA 0.640189792258  
AGCCGCGC -1.40001864353  
AGCCGCGG -0.649294664895  
AGCCGCTA -0.991650033658  
AGCCGCTC -0.676356971082  
AGCCGCTG -1.20808602975  
AGCCGGAA -0.366093488781  
AGCCGGAC -1.18727447594  
AGCCGGAG -0.549006999257  
AGCCGGAT 0.0299130956026  
AGCCGGCA -0.646426804884  
AGCCGGCC -1.39350558689  
AGCCGGCG -1.24479738585  
AGCCGGCT -1.64208551395  
AGCCGGGA -0.772225434316  
AGCCGGGC -1.55944280669  
AGCCGGGG -0.779838503466  
AGCCGGTA -0.537233701124  
AGCCGGTC -0.827168186196  
AGCCGGTG -1.3216171465  
AGCCGTAA -0.334999191254  
AGCCGTAC 0.248947985744  
AGCCGTAG -1.04636087526  
AGCCGTAT 0.0810653426128  
AGCCGTCA -0.549009497392

AGCCGTCC -0.633971099295  
AGCCGTCG -1.28519599053  
AGCCGTGA 0.198644688584  
AGCCGTGC -1.13277264505  
AGCCGTGG -0.382139432012  
AGCCGTTA -1.02021476041  
AGCCGTTC 0.395328340487  
AGCCGTTG -0.0597658195877  
AGCCTAAA -0.808119899971  
AGCCTAAC -1.39063356332  
AGCCTAAG -0.266327725367  
AGCCTAAT -0.250772874018  
AGCCTACA -0.0224407547747  
AGCCTACC -1.06076845769  
AGCCTACG -0.688075102047  
AGCCTACT -0.610337692806  
AGCCTAGA 0.0567570230761  
AGCCTAGC -1.09134147753  
AGCCTAGG -1.18873463637  
AGCCTATA 0.0297332298179  
AGCCTATC 2.06152669484  
AGCCTATG -0.232428645761  
AGCCTCAA -0.581617665273  
AGCCTCAC -0.310984194508  
AGCCTCAG -0.731685684958  
AGCCTCAT -1.28029256611  
AGCCTCCA -0.601521146687  
AGCCTCCC -1.33720697175  
AGCCTCCG -1.31330064392  
AGCCTCCT -1.17381764239  
AGCCTCGA -0.13995223472  
AGCCTCGC -1.26340454291  
AGCCTCGG -0.8026939488  
AGCCTCTA -0.289425698061  
AGCCTCTC -1.37723564414  
AGCCTCTG -0.65943730482  
AGCCTGAA -0.10650344411  
AGCCTGAC -0.42119070873  
AGCCTGAG -0.526792533959  
AGCCTGAT -0.580047586861  
AGCCTGCA -0.470738111604  
AGCCTGCC -1.37198227253  
AGCCTGCG -1.79697243778  
AGCCTGGA -0.122552301832  
AGCCTGGC -1.34007816261  
AGCCTGGG -0.969412460603  
AGCCTGTA 0.348197259561  
AGCCTGTC -0.712383421583  
AGCCTGTG -0.705489399216  
AGCCTTAA -1.31735074674  
AGCCTTAC -0.72716738983  
AGCCTTAG -1.04540846094  
AGCCTTAT 0.51157659638  
AGCCTTCA -0.890054593877

AGCCTTCC -1.28270222637  
AGCCTTCG -0.618338181199  
AGCCTTGA -0.506707521336  
AGCCTTGC -1.25347924081  
AGCCTTGG -1.00559213011  
AGCCTTTA -0.118524057696  
AGCCTTTC -0.437669245828  
AGCCTTTG -0.101114964977  
AGCGAAAA -0.496233045692  
AGCGAAAC 0.716483695305  
AGCGAAAG 0.286720633239  
AGCGAAAT 2.43357615595  
AGCGAACA -0.408591776683  
AGCGAACC -1.06326909173  
AGCGAACG -0.675293597901  
AGCGAACT -0.121778920594  
AGCGAAGA -0.342048514403  
AGCGAAGC -0.932264763439  
AGCGAAGG -1.3875235923  
AGCGAATA 3.18741322828  
AGCGAATC 11.66558684  
AGCGAATG 0.222829558571  
AGCGACAA -0.125495105921  
AGCGACAC -0.277361575274  
AGCGACAG -0.924536780037  
AGCGACAT -0.36473887459  
AGCGACCA -0.13239308367  
AGCGACCC -0.72927456746  
AGCGACCG -1.2986894634  
AGCGACCT -0.701782998255  
AGCGACGA 0.451116086834  
AGCGACGC -0.356922415542  
AGCGACGG -1.15317825178  
AGCGACTA -0.0368046198341  
AGCGACTC -1.13829831348  
AGCGACTG 0.0433859588583  
AGCGAGAA -0.585766236289  
AGCGAGAC 1.46781014105  
AGCGAGAG -0.401072803985  
AGCGAGAT 1.02408041753  
AGCGAGCA 0.0660382224724  
AGCGAGCC -0.625318805611  
AGCGAGCG -0.163476764119  
AGCGAGCT -0.895348976557  
AGCGAGGA -0.190364825327  
AGCGAGGC -1.06571476677  
AGCGAGGG -0.847935189919  
AGCGAGTA 0.476668061693  
AGCGAGTC -0.617956382762  
AGCGAGTG 1.65177057865  
AGCGATAA -0.399528123288  
AGCGATAC 1.49412758638  
AGCGATAG 0.831508697319  
AGCGATAT 4.22371265303



AGCGATCA 1.8775581383  
AGCGATCC 3.3337361259  
AGCGATCG 2.25521216731  
AGCGATGA 0.377443561057  
AGCGATGC -0.0587894648074  
AGCGATGG -0.998114168473  
AGCGATTA 1.43406074142  
AGCGATTC 1.17137259188  
AGCGATTG 2.58182574088  
AGCGCAAA 1.1347282691  
AGCGCAAC 0.447817714737  
AGCGCAAG -0.416764220097  
AGCGCAAT 1.36951973506  
AGCGCACA 0.159825322147  
AGCGCACC -0.787633520181  
AGCGCACG -0.975880758978  
AGCGCACT -0.106222403821  
AGCGCAGA 0.217794773846  
AGCGCAGC -1.01932105229  
AGCGCAGG -0.373235242958  
AGCGCATA -0.0533959894029  
AGCGCATC 0.556011355959  
AGCGCATG -0.762785811468  
AGCGCCAA -0.422752668201  
AGCGCCAC -0.69880563662  
AGCGCCAG -1.11051342148  
AGCGCCAT -1.4419856612  
AGCGCCCA -1.07722950784  
AGCGCCCC -1.33021573026  
AGCGCCCG -1.57651194475  
AGCGCCCT -1.01859326203  
AGCGCCGA -0.11249439035  
AGCGCCGC -0.325432579832  
AGCGCCGG -1.22909285452  
AGCGCCTA -0.662658859239  
AGCGCCTC -0.555492160049  
AGCGCCTG -0.398333806151  
AGCGCGAA -0.179555183116  
AGCGCGAC -0.308827470515  
AGCGCGAG -0.26487214485  
AGCGCGAT 2.72866596081  
AGCGCGCA 1.51630041608  
AGCGCGCC -0.962585679727  
AGCGCGCG -0.036758196142  
AGCGCGCT -0.152720207297  
AGCGCGGA 1.13462626188  
AGCGCGGC -0.986176617905  
AGCGCGGG -1.41223765075  
AGCGCGTA 0.13327513382  
AGCGCGTC -0.16159025516  
AGCGCGTG 0.893582378121  
AGCGCTAA 0.326077098893  
AGCGCTAC 0.443970793631  
AGCGCTAG -1.22451168964

AGCGCTAT 0.723973523084  
AGCGCTCA 0.285487386817  
AGCGCTCC -0.163410563518  
AGCGCTCG -0.806383279166  
AGCGCTGA 0.512920593493  
AGCGCTGC -0.163410563518  
AGCGCTGG 0.189586864172  
AGCGCTTA -1.04438026984  
AGCGCTTC 0.576128427993  
AGCGCTTG -0.555449691738  
AGCGGAAA -0.444617810829  
AGCGGAAC -0.361024562865  
AGCGGAAG -1.34942993435  
AGCGGAAT 0.713790704806  
AGCGGACA -0.861647874221  
AGCGGACC -0.600869133218  
AGCGGACG -0.922465200844  
AGCGGACT -0.387090737362  
AGCGGAGA 0.645307431823  
AGCGGAGC -0.887096800973  
AGCGGAGG -1.0662422898  
AGCGGATA 2.9674573587  
AGCGGATC 4.31003969437  
AGCGGATG 0.552663021144  
AGCGGCAA -0.865441293582  
AGCGGCAC -0.495581032223  
AGCGGCAG -1.06571851398  
AGCGGCAT -0.604730834961  
AGCGGCCA -0.948619642809  
AGCGGCCC -2.07432672682  
AGCGGCCG -0.755561410628  
AGCGGCCT -0.907090631635  
AGCGGCGA -0.519886853624  
AGCGGCGC -0.809017147115  
AGCGGCGG -1.13352666573  
AGCGGCTA -1.06979214091  
AGCGGCTC -0.98687359782  
AGCGGCTG -0.598249213194  
AGCGGGAA -1.07166657555  
AGCGGGAC -1.36223496261  
AGCGGGAG -0.621345104109  
AGCGGGAT 1.54726814139  
AGCGGGCA -0.621426709881  
AGCGGGCC -1.19290423337  
AGCGGGCG -0.5859827414  
AGCGGGGA 1.07012605841  
AGCGGGGC -1.02861682415  
AGCGGGGG -0.835848792087  
AGCGGGTA -0.0422834482151  
AGCGGGTC -1.14411543109  
AGCGGGTG -0.694107475707  
AGCGGTAA 0.21154631143  
AGCGGTAC -0.418821226831  
AGCGGTAG -0.710819172155

AGCGGTAT 1.60338564168  
AGCGGTCA -0.571260810195  
AGCGGTCC -1.47571590846  
AGCGGTCG -0.863278740606  
AGCGGTGA -0.183682519976  
AGCGGTGC -1.53711842341  
AGCGGTGG -1.66380430745  
AGCGGTTA 0.00578027011276  
AGCGGTTC -0.111691239658  
AGCGGTTG -0.688846401505  
AGCGTAAA -0.0709966058746  
AGCGTAAC 0.554456682719  
AGCGTAAG -0.78371977394  
AGCGTAAT 2.26893401144  
AGCGTACA 0.427353193636  
AGCGTACC -0.357500109468  
AGCGTACG -0.72372516674  
AGCGTACT -0.368945110909  
AGCGTAGA 0.544257626558  
AGCGTAGC -0.237020011364  
AGCGTAGG -0.654694385639  
AGCGTATA 0.826754120171  
AGCGTATC 4.14912893218  
AGCGTATG 0.395820889615  
AGCGTCAA -0.635755601038  
AGCGTCAC -0.0795964387046  
AGCGTCAG 0.0567676401537  
AGCGTCAT -0.432230803977  
AGCGTCCA 0.254036688569  
AGCGTCCC -1.17378121124  
AGCGTCCG -1.05369123869  
AGCGTCCT -1.17896484323  
AGCGTCGA -0.236368206072  
AGCGTCGC 0.194265664532  
AGCGTCGG -1.06552449209  
AGCGTCTA -1.04415627032  
AGCGTCTC -0.969803418871  
AGCGTCTG 0.520262614898  
AGCGTGAA -0.776567402685  
AGCGTGAC 0.301516259453  
AGCGTGAG 0.00962469308229  
AGCGTGAT 1.56944305287  
AGCGTGCA -0.518093400227  
AGCGTGCC -0.929742478893  
AGCGTGCG -0.822763139895  
AGCGTGGA 0.974428301131  
AGCGTGGC -1.22426562325  
AGCGTGGG -0.402904562133  
AGCGTGTA -0.452880395313  
AGCGTGTC -0.688630729106  
AGCGTGTG 0.386168092504  
AGCGTTAA -0.336632347598  
AGCGTTAC 1.26674621603  
AGCGTTAG -0.814025493235

AGCGTTAT 1.76287829539  
AGCGTTCA 0.45505835346  
AGCGTTCC -0.358591170322  
AGCGTTCCG 0.239210460191  
AGCGTTGA 0.332058468946  
AGCGTTGC -0.814318607847  
AGCGTTGG -0.763324159754  
AGCGTTTA -0.145808281622  
AGCGTTTC 0.778906074242  
AGCGTTTG 2.46280601139  
AGCTAAAA -0.409755908012  
AGCTAAAC -0.673222643241  
AGCTAAAG -0.672958257192  
AGCTAAAT -0.606581953661  
AGCTAACA 0.118450154509  
AGCTAACC -0.51560858772  
AGCTAACG -0.690341119485  
AGCTAACT -0.277344712857  
AGCTAAGA -0.218571277755  
AGCTAAGC -0.73914720053  
AGCTAAGG -0.776790361314  
AGCTAATA 1.3878802012  
AGCTAATC -0.237115565062  
AGCTAATG 0.131950289082  
AGCTACAA -0.113304619093  
AGCTACAC -0.0494085481532  
AGCTACAG -0.709733315751  
AGCTACAT -0.153854360994  
AGCTACCA -0.816430365393  
AGCTACCC -0.64110577542  
AGCTACCG -0.618518046984  
AGCTACCT -0.814825729434  
AGCTACGA -0.481994503784  
AGCTACGC -0.80339259414  
AGCTACGG -0.556445198894  
AGCTACTA -0.410279683838  
AGCTACTC -0.937451101742  
AGCTACTG -0.403666285404  
AGCTAGAA -0.569489631843  
AGCTAGAC -0.69262504023  
AGCTAGAG -0.756632070039  
AGCTAGAT 1.99997179359  
AGCTAGCA 0.0868730922204  
AGCTAGCC -0.706738467165  
AGCTAGCG 0.0735222212678  
AGCTAGCT -1.14200679622  
AGCTAGGA 1.08018834163  
AGCTAGGC -0.235599612928  
AGCTAGGG -0.688491666208  
AGCTAGTA 0.556639220782  
AGCTAGTC -0.942823967525  
AGCTAGTG -0.0479771162834  
AGCTATAA 0.724374057539  
AGCTATAC 0.557586014287

AGCTATAG -0.658331255151  
AGCTATAT 1.79979866219  
AGCTATCA 0.0445138672164  
AGCTATCC 1.06165821043  
AGCTATCG 0.143387587936  
AGCTATGA 0.721049871371  
AGCTATGC -0.557306223067  
AGCTATGG -0.40558214746  
AGCTATTA -0.328613955898  
AGCTATTC -0.845675834177  
AGCTATTG 0.501392529034  
AGCTCAAA -0.503015484656  
AGCTCAAC -0.446968556709  
AGCTCAAG 0.15386310447  
AGCTCAAT -0.203111980104  
AGCTCACA -0.806189465456  
AGCTCACC -0.700509781659  
AGCTCACG -1.08468790074  
AGCTCACT -0.701798611604  
AGCTCAGA 0.46130952219  
AGCTCAGC -0.190559055393  
AGCTCAGG -0.392536673621  
AGCTCATA -0.710239188271  
AGCTCATC -1.23469534063  
AGCTCATG -0.369068768636  
AGCTCCAA 0.140667117943  
AGCTCCAC -0.576730686922  
AGCTCCAG -0.944053883099  
AGCTCCAT -1.02162350088  
AGCTCCCA -1.2368853731  
AGCTCCCC -0.377094030209  
AGCTCCCG -0.51064999614  
AGCTCCCT -1.08136808631  
AGCTCCGA -1.12981818299  
AGCTCCGC -0.451030942036  
AGCTCCGG -1.24363991621  
AGCTCCTA -0.504799361866  
AGCTCCTC -1.12054010626  
AGCTCCTG -0.582140608388  
AGCTCGAA 0.176976690513  
AGCTCGAC -0.24398772874  
AGCTCGAG -0.0243791000538  
AGCTCGAT -0.489729981593  
AGCTCGCA -0.963006615626  
AGCTCGCC -0.863592673018  
AGCTCGCG -0.590667162565  
AGCTCGGA 1.8187799151  
AGCTCGGC -0.791561214347  
AGCTCGGG -1.02952593744  
AGCTCGTA -0.167381558706  
AGCTCGTC -0.57746784519  
AGCTCGTG -1.33547222455  
AGCTCTAA 0.251820009315  
AGCTCTAC 0.257865498189

AGCTCTAG -0.514270627768  
AGCTCTAT -0.151835034477  
AGCTCTCA -0.827058684572  
AGCTCTCC -0.80309614868  
AGCTCTCG 0.178669593941  
AGCTCTGA 0.115468837493  
AGCTCTGC -0.428762974994  
AGCTCTGG 0.0972187056874  
AGCTCTTA -0.672760279922  
AGCTCTTC -1.29824083983  
AGCTCTTG -0.409796294542  
AGCTGAAA -0.431109973671  
AGCTGAAC -0.940434500538  
AGCTGAAG -0.910973151177  
AGCTGAAT -0.115020005743  
AGCTGACA -0.807499945912  
AGCTGACC -0.396021573199  
AGCTGACG -0.954412195423  
AGCTGACT -0.796813336895  
AGCTGAGA -0.203248961222  
AGCTGAGC -0.804744085661  
AGCTGAGG -0.81463129119  
AGCTGATA 2.65773180833  
AGCTGATC 0.121330713378  
AGCTGATG -0.951626565719  
AGCTGCAA -0.790819476163  
AGCTGCAC -0.595528535023  
AGCTGCAG -0.0672098482087  
AGCTGCAT -0.154481184927  
AGCTGCCA -0.842631647407  
AGCTGCCC -1.24565174832  
AGCTGCCG -0.756478642859  
AGCTGCCT -0.197039219913  
AGCTGCGA -0.302808836602  
AGCTGCGC -0.696466132351  
AGCTGCGG -0.539348997696  
AGCTGCTA -0.629250871515  
AGCTGCTC -1.00267888729  
AGCTGCTG 0.010885210821  
AGCTGGAA -0.866712220221  
AGCTGGAC -0.323095573699  
AGCTGGAG -0.642242219076  
AGCTGGAT 0.0238055696872  
AGCTGGCA -0.719819123085  
AGCTGGCC -1.44494387046  
AGCTGGCG -0.56524134357  
AGCTGGGA 1.46922408597  
AGCTGGGC -0.805426909473  
AGCTGGGG -0.498466171007  
AGCTGGTA -0.317183735095  
AGCTGGTC -1.06819166851  
AGCTGGTG -0.113069794318  
AGCTGTAA -0.160027671155  
AGCTGTAC -0.163020437961

AGCTGTAG -0.700509781659  
AGCTGTAT 1.36404340482  
AGCTGTCA 0.0573447095462  
AGCTGTCC 0.244577913346  
AGCTGTCCG -0.0576946567499  
AGCTGTGA -0.459264381601  
AGCTGTGC -0.934562840287  
AGCTGTGG -0.728892352668  
AGCTGTGA -0.584704944888  
AGCTGTTC 0.192298174334  
AGCTGTTG 0.455472419485  
AGCTTAAA -0.651100400794  
AGCTTAAC -0.535320545382  
AGCTTAAG 0.112558092815  
AGCTTAAT 0.769140652838  
AGCTTACA -0.151832119985  
AGCTTACC -0.146150109884  
AGCTTACG -0.882319948779  
AGCTTACT -1.28236227171  
AGCTTAGA -0.103689710376  
AGCTTAGC 0.301840808942  
AGCTTAGG -0.928450109922  
AGCTTATA 1.27727398524  
AGCTTATC 0.167755030023  
AGCTTATG -0.808456315605  
AGCTTCAA -1.00065685446  
AGCTTCAC -0.488361419477  
AGCTTCAG -0.662031618951  
AGCTTCAT -0.0196853108788  
AGCTTCCA -0.959222147918  
AGCTTCCC -0.836268478918  
AGCTTCCG -0.114293048197  
AGCTTCCT -1.06281568006  
AGCTTCGA -0.44110917896  
AGCTTCGC 0.907067732056  
AGCTTCGG -0.683893847087  
AGCTTCTA 0.244155728379  
AGCTTCTC -0.57231960346  
AGCTTCTG -0.171400851188  
AGCTTGAA 0.280541077739  
AGCTTGAC -0.615130782883  
AGCTTGAG -0.483070784  
AGCTTGAT 0.686889944741  
AGCTTGCA -0.604612589861  
AGCTTGCC -1.31596261589  
AGCTTGCG -0.657603048537  
AGCTTGGA 1.08306681872  
AGCTTGGC -0.604826596837  
AGCTTGGG -0.549053214771  
AGCTTGTA 0.403153959366  
AGCTTGTC -0.789769634552  
AGCTTGTG 0.0517424316162  
AGCTTTAA -0.884566813842  
AGCTTTAC -0.159891939105

AGCTTTAG -1.52673159071  
AGCTTTAT 0.882179012279  
AGCTTTCA 1.27409531548  
AGCTTTCC 0.406522071091  
AGCTTTTCG -0.191384481129  
AGCTTTGA -0.616124000081  
AGCTTTGC -0.785766996309  
AGCTTTGG -0.675632928027  
AGCTTTTA 0.0532835732875  
AGCTTTTC 0.292144710808  
AGCTTTTG -0.454069508  
AGGAAAAA -0.158929324072  
AGGAAAAC 0.383546298878  
AGGAAAAG -0.681113838188  
AGGAAAAT 1.45474613937  
AGGAAACA 0.785674773459  
AGGAAACC -0.791236248502  
AGGAAACG -0.121619456252  
AGGAAACT -0.331853205446  
AGGAAAGA -0.540091152235  
AGGAAAGC -0.814086281208  
AGGAAAGG -0.858028699838  
AGGAAATA 3.24811459976  
AGGAAATC 23.7472313441  
AGGAAATG -0.279926744486  
AGGAACAA -0.439883426946  
AGGAACAC -0.0476771317976  
AGGAACAG -0.568754971711  
AGGAACAT 0.551380644716  
AGGAACCA 0.142390415357  
AGGAACCC -1.3904701436  
AGGAACCG -1.22061043408  
AGGAACCT -0.306326420125  
AGGAACGA -1.22318517948  
AGGAACGC -1.05453810676  
AGGAACGG -0.821689357815  
AGGAACTA 0.00222750450935  
AGGAACTC -0.61766639082  
AGGAACTG -0.331423109716  
AGGAAGAA -0.650160893518  
AGGAAGAC -0.0475628420803  
AGGAAGAG -0.24034752838  
AGGAAGAT 2.02556686129  
AGGAAGCA -0.377023874226  
AGGAAGCC -0.853926136159  
AGGAAGCG -0.449863063503  
AGGAAGGA -0.372236613133  
AGGAAGGC -1.30986071079  
AGGAAGGG -1.48928952986  
AGGAAGTA 0.261842114184  
AGGAAGTC -1.11139713705  
AGGAAGTG 0.826447057633  
AGGAATAA 0.575383150783  
AGGAATAC 1.21174163528



AGGAATAG 0.304335405814  
AGGAATAT 4.76049127706  
AGGAATCA 4.15155836934  
AGGAATCC 8.19018267641  
AGGAATCG 3.39600008138  
AGGAATGA -0.680115832897  
AGGAATGC 0.427150844628  
AGGAATGG 0.0381427879637  
AGGAATTA 1.52429299371  
AGGAATTC 1.32697231715  
AGGAATTG 1.58665062929  
AGGACAAA 1.16523904372  
AGGACAAC 0.508203280205  
AGGACAAG 0.236599491821  
AGGACAAT 1.48373325927  
AGGACACA -0.5290622986  
AGGACACC -0.373616625039  
AGGACACG -0.703036854298  
AGGACACT -0.352959331117  
AGGACAGA -0.29928084418  
AGGACAGC -0.994836822352  
AGGACAGG 0.125419953666  
AGGACATA 0.313409676287  
AGGACATC -0.162711085466  
AGGACATG -0.867216635494  
AGGACCAA -1.06048033935  
AGGACCAC -1.06653040814  
AGGACCAG -0.70209859609  
AGGACCAT -0.705293711904  
AGGACCCA -1.09112455606  
AGGACCCC -1.35609392003  
AGGACCCG -1.19264796626  
AGGACCCT -1.50153414297  
AGGACCGA -0.893541575235  
AGGACCGC -1.23562443901  
AGGACCGG -0.886993544689  
AGGACCTA -1.01375916089  
AGGACCTC -1.03892912914  
AGGACCTG -1.04231472781  
AGGACGAA -0.411360335792  
AGGACGAC -0.845427061477  
AGGACGAG -0.582021114221  
AGGACGAT 2.06339072057  
AGGACGCA 0.416173410957  
AGGACGCC -1.68361202698  
AGGACGCG -0.548805482961  
AGGACGGA -0.484648773176  
AGGACGGC -1.22592230371  
AGGACGGG -0.75242479283  
AGGACGTA -0.199860031698  
AGGACGTC -0.945109761872  
AGGACGTG -0.17277711589  
AGGACTAA -0.854957241751  
AGGACTAC -0.39548759665

AGGACTAG -0.630114393824  
AGGACTAT 0.274236615443  
AGGACTCA -1.12377769039  
AGGACTCC -1.16161945298  
AGGACTCG -1.20349528868  
AGGACTGA -0.0624946167006  
AGGACTGC -0.64390847572  
AGGACTGG -0.360741648975  
AGGACTTA 0.459336411186  
AGGACTTC -0.447455068675  
AGGACTTG -0.719972550265  
AGGAGAAA 0.499047195782  
AGGAGAAC -0.279606358557  
AGGAGAAG -0.854955784505  
AGGAGAAT 1.40573895839  
AGGAGACA 0.112807490049  
AGGAGACC -0.981266531796  
AGGAGACG -0.555590836417  
AGGAGACT -0.880692829598  
AGGAGAGA 0.29166673414  
AGGAGAGC -0.701100798977  
AGGAGAGG -0.883389983656  
AGGAGATA 1.71334400773  
AGGAGATC 6.12483071098  
AGGAGATG 0.438204471444  
AGGAGCAA -0.286913406059  
AGGAGCAC -0.685663360015  
AGGAGCAG -0.960261372451  
AGGAGCAT -0.847128292024  
AGGAGCCA -0.821630651621  
AGGAGCCC -1.6600608508  
AGGAGCCG -0.331052552891  
AGGAGCCT -1.45868320155  
AGGAGCGA -0.161943741389  
AGGAGCGC -0.973490667457  
AGGAGCGG -1.03834477351  
AGGAGCTA -0.284968190906  
AGGAGCTC -1.22223963504  
AGGAGCTG -0.540937603949  
AGGAGGAA -0.405880466521  
AGGAGGAC -1.33325721072  
AGGAGGAG -0.80048934387  
AGGAGGAT 1.85545921179  
AGGAGGCA -0.698352224954  
AGGAGGCC -1.30284990056  
AGGAGGCG -1.01094709258  
AGGAGGGA -0.227173816898  
AGGAGGGC -1.31561558318  
AGGAGGGG -0.447801476853  
AGGAGGTA -0.762722733537  
AGGAGGTC -1.17070392417  
AGGAGGTG -1.07800892624  
AGGAGTAA -0.0993725151877  
AGGAGTAC -0.252370015569

AGGAGTAG -0.883398935309  
AGGAGTAT 0.839185468935  
AGGAGTCA -0.8222485239  
AGGAGTCC -0.813628914161  
AGGAGTCG -1.24369945512  
AGGAGTGA -0.220512745704  
AGGAGTGC -0.852814257506  
AGGAGTGG -0.894828531578  
AGGAGTTA 0.238870713708  
AGGAGTTC -0.131840371102  
AGGAGTTG 0.343229716327  
AGGATAAA 1.50395462847  
AGGATAAC 1.23203336865  
AGGATAAG 0.0393152464119  
AGGATAAT 3.37415429931  
AGGATACA 0.880271269165  
AGGATACC 1.6940357072  
AGGATACG 5.75154113357  
AGGATACT 1.98993719804  
AGGATAGA 0.660172797664  
AGGATAGC 0.0888628574635  
AGGATAGG -0.127725941278  
AGGATATA 1.84211375346  
AGGATATC 14.758772464  
AGGATATG 4.32787430291  
AGGATCAA 0.130343571343  
AGGATCAC 2.69929246256  
AGGATCAG 0.621446694968  
AGGATCAT 2.6126685594  
AGGATCCA 2.64578572247  
AGGATCCC 2.53659449231  
AGGATCCG 3.63797785161  
AGGATCCT 4.19520621611  
AGGATCGA 0.516808109307  
AGGATCGC 5.39310568038  
AGGATCGG 1.99611258998  
AGGATCTA 3.94898577841  
AGGATCTC 6.53179974022  
AGGATCTG 4.83328945527  
AGGATGAA -0.471515448224  
AGGATGAC -0.133604471403  
AGGATGAG 1.35366864643  
AGGATGAT 1.02422364399  
AGGATGCA -0.433947023339  
AGGATGCC -0.556612157643  
AGGATGCG 0.0444647372104  
AGGATGGA -0.733761219533  
AGGATGGC -0.935597068549  
AGGATGGG -0.683893847087  
AGGATGTA 0.321182834313  
AGGATGTC -0.398869448123  
AGGATGTG 0.671892594053  
AGGATTAA -0.413685892136  
AGGATTAC 11.8440172375

AGGATTAG -0.29928084418  
AGGATTAT 4.76435943232  
AGGATTCA 1.76538684019  
AGGATTCC 9.60326781976  
AGGATTCG 4.29202771819  
AGGATTGA -0.706519463918  
AGGATTGC 11.1146146405  
AGGATTGG 0.0129567900147  
AGGATTTA 3.42267434379  
AGGATTTT 18.2223469133  
AGGATTTG 5.92342995397  
AGGCAAAA 0.0890864406264  
AGGCAAAC -0.0318541471956  
AGGCAAAG 1.07470888872  
AGGCAAAT 2.06412017625  
AGGCAACA 0.331154143751  
AGGCAACC -0.78808651549  
AGGCAACG -0.762218734619  
AGGCAACT -0.491696639079  
AGGCAAGA -0.509868079603  
AGGCAAGC -1.31993257019  
AGGCAAGG -1.28179394579  
AGGCAATA -0.063050035582  
AGGCAATC 7.43153627613  
AGGCAATG 0.137839644462  
AGGCACAA -1.23476612115  
AGGCACAC -0.627646651912  
AGGCACAG -0.511421920132  
AGGCACAT -0.632643340065  
AGGCACCA -0.229942584186  
AGGCACCC -1.39458436524  
AGGCACCG -1.16876120715  
AGGCACCT -0.717933863194  
AGGCACGA -0.639408292077  
AGGCACGC -1.09754434896  
AGGCACGG -0.796895983558  
AGGCACTA -0.980219812855  
AGGCACTC -1.50221988127  
AGGCACTG -0.986788869378  
AGGCAGAA -0.863612658105  
AGGCAGAC -1.03727140779  
AGGCAGAG -0.543331650852  
AGGCAGAT 1.39775907961  
AGGCAGCA 0.728262406065  
AGGCAGCC -0.533944697036  
AGGCAGCG -0.0880010005785  
AGGCAGGA -0.40855888456  
AGGCAGGC -1.52148134176  
AGGCAGGG -1.05384570676  
AGGCAGTA -0.236710867046  
AGGCAGTC -0.963863268061  
AGGCAGTG 0.864952075302  
AGGCATAA 0.63363468366  
AGGCATAC -0.442747956109

AGGCATAG 0.0153720710724  
AGGCATAT 1.61530508076  
AGGCATCA 0.91223429345  
AGGCATCC -1.05482560057  
AGGCATCG -0.756088725481  
AGGCATGA -0.748073872807  
AGGCATGC -0.590973392391  
AGGCATGG -0.623619656844  
AGGCATTA 0.858512921846  
AGGCATTC -0.924237420085  
AGGCATTG -0.143187737065  
AGGCCAAA -1.07036567128  
AGGCCAAC 0.268336851163  
AGGCCAAG -0.502384288986  
AGGCCAAT 0.0991331104975  
AGGCCACA -0.772577671478  
AGGCCACC -1.28818292835  
AGGCCACG -1.16208618803  
AGGCCACT -1.03135165842  
AGGCCAGA -0.446670237647  
AGGCCAGC -1.53541386202  
AGGCCAGG -0.815716731238  
AGGCCATA -0.674849346067  
AGGCCATC -0.279363206662  
AGGCCATG 0.347644338816  
AGGCCCAA -1.27578009997  
AGGCCCAC -0.681141942217  
AGGCCCAG -1.35377981348  
AGGCCCAT -1.46753992602  
AGGCCCCA -0.901758776916  
AGGCCCCC -1.91609979529  
AGGCCCCG -1.42943669187  
AGGCCCCT -1.07726115089  
AGGCCCGA -1.37170685304  
AGGCCCGC -1.05172437303  
AGGCCCGG -1.42422474768  
AGGCCCTA -0.839379490823  
AGGCCCTC -1.47628673251  
AGGCCCTG -0.659077156895  
AGGCCGAA -0.655680316607  
AGGCCGAC -0.865597427076  
AGGCCGAG 0.611282196354  
AGGCCGAT -0.632638343793  
AGGCCGCA -0.887493380047  
AGGCCGCC -1.14575816362  
AGGCCGCG -1.36613434457  
AGGCCGGA -0.495200066498  
AGGCCGGC -1.3047715916  
AGGCCGGG -1.45981735524  
AGGCCGTA -0.820547709709  
AGGCCGTC -1.06316167188  
AGGCCGTG -0.0117845397444  
AGGCCTAA -1.13723431576  
AGGCCTAC -1.15644914438

AGGCCTAG -0.878833383777  
AGGCCTAT -0.663159110953  
AGGCCTCA -0.580395244107  
AGGCCTCC -1.09306248498  
AGGCCTCG -1.92873203582  
AGGCCTGA -0.129446740556  
AGGCCTGC -0.696769655863  
AGGCCTGG -0.610913721309  
AGGCCTTA -0.110153220657  
AGGCCTTC -1.1668349362  
AGGCCTTG -0.438419102953  
AGGCGAAA 0.122497759199  
AGGCGAAC -0.218218624237  
AGGCGAAG -0.345346470145  
AGGCGAAT 3.29099551881  
AGGCGACA 0.66077443206  
AGGCGACC -0.813171338936  
AGGCGACG -0.772677596914  
AGGCGACT -1.00485518002  
AGGCGAGA -0.175844826773  
AGGCGAGC -1.7604359512  
AGGCGAGG -0.790167462694  
AGGCGATA 0.336652124507  
AGGCGATC 4.24612946733  
AGGCGATG -0.340061039118  
AGGCGCAA 1.40754885784  
AGGCGCAC 0.00507746121336  
AGGCGCAG -0.75271499295  
AGGCGCAT -0.992640960898  
AGGCGCCA -0.577884617529  
AGGCGCCC -1.3610393964  
AGGCGCCG -0.752876330893  
AGGCGCCT -1.15656843037  
AGGCGCGA 0.131636356671  
AGGCGCGC 0.0823244031056  
AGGCGCGG -0.356132588242  
AGGCGCTA -0.336683143028  
AGGCGCTC -0.0251932841787  
AGGCGCTG -0.659298241922  
AGGCGGAA -0.519160936967  
AGGCGGAC -0.836257653662  
AGGCGGAG -0.451030942036  
AGGCGGAT 1.07118360261  
AGGCGGCA -0.756639564446  
AGGCGGCC -1.0901130192  
AGGCGGCG -0.539249488616  
AGGCGGGA 0.0608248210306  
AGGCGGGC -1.37275190656  
AGGCGGGG -1.22441384598  
AGGCGGTA -0.797279863774  
AGGCGGTC -1.66070890889  
AGGCGGTG -0.198003084014  
AGGCGTAA 0.02619233036  
AGGCGTAC -0.797176815669

AGGCGTAG -0.859923744095  
AGGCGTAT 1.41478262669  
AGGCGTCA -0.411437153471  
AGGCGTCC -1.81462947049  
AGGCGTCG -1.57580164144  
AGGCGTGA -0.0110950542365  
AGGCGTGC -1.21673978068  
AGGCGTGG -0.986721003352  
AGGCGTTA -0.441488895616  
AGGCGTTC -0.165230871875  
AGGCGTTG 0.428350782571  
AGGCTAAA -0.51888489295  
AGGCTAAC -0.238166447563  
AGGCTAAG -0.630393352332  
AGGCTAAT 0.47727469236  
AGGCTACA -0.793501016872  
AGGCTACC -0.949268533609  
AGGCTACG -0.738589283513  
AGGCTACT -0.69225906332  
AGGCTAGA -1.32494154085  
AGGCTAGC -1.1758294745  
AGGCTAGG -0.849260659191  
AGGCTATA -0.349809806283  
AGGCTATC -0.538958663961  
AGGCTATG 0.999349288497  
AGGCTCAA -0.923053720026  
AGGCTCAC -1.22540831225  
AGGCTCAG -0.242668921164  
AGGCTCAT -0.94143146494  
AGGCTCCA -0.423477752145  
AGGCTCCC -1.7872474029  
AGGCTCCG -1.16745926199  
AGGCTCGA -0.250433960248  
AGGCTCGC -1.35899300674  
AGGCTCGG -1.276500604  
AGGCTCTA -0.809795316447  
AGGCTCTC -0.129263960279  
AGGCTCTG 0.026439437636  
AGGCTGAA -0.896369881428  
AGGCTGAC -0.591043548374  
AGGCTGAG -0.751184468356  
AGGCTGAT -0.211679128989  
AGGCTGCA -0.362473689864  
AGGCTGCC -0.666618820994  
AGGCTGCG -0.92052519014  
AGGCTGGA -0.898201223219  
AGGCTGGC -1.71473900846  
AGGCTGGG -1.11811108546  
AGGCTGTA -0.392841862556  
AGGCTGTC -1.3895658184  
AGGCTGTG -0.750864706961  
AGGCTTAA -1.1260487041  
AGGCTTAC -1.48936447394  
AGGCTTAG -0.444715654485

AGGCTTAT -0.120133898105  
AGGCTTCA -0.72716738983  
AGGCTTCC -1.00224920792  
AGGCTTCG -1.45555137184  
AGGCTTGA -0.5648381028  
AGGCTTGC -1.39174065388  
AGGCTTGG -1.81208782539  
AGGCTTTA -0.00329878845375  
AGGCTTTC 0.0624902449628  
AGGCTTTG -0.131900326364  
AGGGAAAA -0.401682140966  
AGGGAAAC 0.652577839999  
AGGGAAAG -0.19583095485  
AGGGAAAT 4.5436368432  
AGGGAAACA 0.652486658039  
AGGGAAACC -0.935133039806  
AGGGAAACG -0.660078493034  
AGGGAAACT -0.894777319792  
AGGGAAGA -0.573091319274  
AGGGAAGC -0.66121701847  
AGGGAAGG -1.07427525396  
AGGGAATA 1.02660561657  
AGGGAATC 13.6358532997  
AGGGAATG -0.31687230082  
AGGGACAA -0.906106366091  
AGGGACAC -1.03172700334  
AGGGACAG -1.12320644998  
AGGGACAT -0.154030479575  
AGGGACCA -0.0618634210303  
AGGGACCC -1.38834360541  
AGGGACCG -1.05018302318  
AGGGACCT -1.32069450164  
AGGGACGA -0.954367437155  
AGGGACGC -0.968819569683  
AGGGACGG -1.06576223135  
AGGGACTA -0.792569004004  
AGGGACTC -0.74755009698  
AGGGACTG -0.554536623067  
AGGGAGAA -0.858159435617  
AGGGAGAC -1.00600057533  
AGGGAGAG -1.02687125169  
AGGGAGAT 2.56728076097  
AGGGAGCA -1.67077618838  
AGGGAGCC -1.82121913663  
AGGGAGCG -0.298473113573  
AGGGAGGA 0.393441831528  
AGGGAGGC -1.7852932361  
AGGGAGGG -1.66286792284  
AGGGAGTA 0.327422345075  
AGGGAGTC -1.28917677008  
AGGGAGTG -0.400155363576  
AGGGATAA 0.457077055444  
AGGGATAC 1.38014909513  
AGGGATAG -0.35462163238



AGGGATAT 3.66485987566  
AGGGATCA 1.07443159563  
AGGGATCC 0.832850196297  
AGGGATCG 0.613749938266  
AGGGATGA -0.415346527974  
AGGGATGC -0.035948591933  
AGGGATGG -0.927116729886  
AGGGATTA 1.22984625067  
AGGGATTC 5.09519589646  
AGGGATTG 2.96481329003  
AGGGCAAA -0.0595751285474  
AGGGCAAC 0.302038369856  
AGGGCAAG -0.666101290507  
AGGGCAAT 1.52082412384  
AGGGCACA -0.925631379917  
AGGGCACC -1.52336576894  
AGGGCACG -0.801241699131  
AGGGCACT -1.36871991522  
AGGGCAGA -0.264407699751  
AGGGCAGC -1.44791498676  
AGGGCAGG -0.960866337695  
AGGGCATA -0.822948834664  
AGGGCATC -0.778325674002  
AGGGCATG -0.82879613809  
AGGGCCAA -0.532479332153  
AGGGCCAC -0.673749125382  
AGGGCCAG -1.04521714537  
AGGGCCAT -1.15409673307  
AGGGCCCA -1.08198637495  
AGGGCCCC -1.29074351765  
AGGGCCCG -1.17823413848  
AGGGCCCT -0.801838337255  
AGGGCCGA -0.895159118229  
AGGGCCGC -1.61549785358  
AGGGCCGG -1.46748038711  
AGGGCCTA -0.94565726999  
AGGGCCTC -1.1110259557  
AGGGCCTG -1.16004167198  
AGGGCGAA -0.73409222254  
AGGGCGAC -1.1524373463  
AGGGCGAG -0.699759091821  
AGGGCGAT 0.528919904854  
AGGGCGCA 0.150165655163  
AGGGCGCC -0.912144360558  
AGGGCGCG -0.203515637229  
AGGGCGGA -0.0136820821372  
AGGGCGGC -0.905523467715  
AGGGCGGG 0.421701161166  
AGGGCGTA 0.161555281257  
AGGGCGTC -1.40889535309  
AGGGCGTG -1.01220323858  
AGGGCTAA -0.614327215836  
AGGGCTAC -0.260219574918  
AGGGCTAG -1.19464189506

AGGGCTAT -0.37430881686  
AGGGCTCA -1.57821837975  
AGGGCTCC -1.42755642825  
AGGGCTCG -1.36161917211  
AGGGCTGA -0.223054182624  
AGGGCTGC -1.27860923888  
AGGGCTGG -1.45426150101  
AGGGCTTA -0.451294079017  
AGGGCTTC -1.39730483524  
AGGGCTTG -0.687299639028  
AGGGGAAA -0.776725826137  
AGGGGAAC -0.228373338486  
AGGGGAAG -0.258988410276  
AGGGGAAT 2.67812617345  
AGGGGACA -0.310108597875  
AGGGGACC -1.90338532446  
AGGGGACG -1.08438729172  
AGGGGACT -0.994165240151  
AGGGGAGA 0.339676950724  
AGGGGAGC -0.87605837115  
AGGGGAGG -1.35000096658  
AGGGGATA 2.09097034907  
AGGGGATC 2.56078415039  
AGGGGATG -0.102496642307  
AGGGGCAA -0.665794019792  
AGGGGCAC -1.29499034867  
AGGGGCAG -0.987477313996  
AGGGGCAT -0.659272011495  
AGGGGCCA -1.26453848843  
AGGGGCCC -1.3343763756  
AGGGGCCG -1.11873437037  
AGGGGCGA -1.09680261078  
AGGGGCGC -0.909188649434  
AGGGGCGG -1.13225573909  
AGGGGCTA -0.578399441702  
AGGGGCTC -1.35391263104  
AGGGGCTG -0.878434514745  
AGGGGGAA -0.721999579368  
AGGGGGAC -1.16480291082  
AGGGGGAG -0.161782403446  
AGGGGGAT 0.0272613243465  
AGGGGGCA -1.12589985683  
AGGGGGCC -1.29074351765  
AGGGGGCG -1.12931522496  
AGGGGGGA -0.453613181843  
AGGGGGGC -1.93453687094  
AGGGGGGG -1.75160483262  
AGGGGGTA -0.54153861381  
AGGGGGTC -1.4199849947  
AGGGGGTG -1.12748325864  
AGGGGTAA 0.45505835346  
AGGGGTAC -0.765478801967  
AGGGGTAG -0.705713815091  
AGGGGTAT 0.322842221083

AGGGGTCA -0.926842559471  
AGGGGTCC -1.42461258328  
AGGGGTCCG -1.67425026271  
AGGGGTGA 0.590058450118  
AGGGGTGC -0.571640526851  
AGGGGTGG -0.414830246555  
AGGGGTTA 0.0591600216323  
AGGGGTTC -0.362220545426  
AGGGGTTG 0.229961112027  
AGGGTAAA 0.000495463619836  
AGGGTAAC 0.0815416538574  
AGGGTAAG -0.621645713128  
AGGGTAAT 2.69280480363  
AGGGTACA -0.281284273168  
AGGGTACC -1.26280977839  
AGGGTACG 0.709861345216  
AGGGTACT 0.618948975426  
AGGGTAGA -0.0887333707527  
AGGGTAGC -1.26922249324  
AGGGTAGG -1.23672216156  
AGGGTATA 0.22532665358  
AGGGTATC 2.89999186792  
AGGGTATG 0.573414203339  
AGGGTCAA -1.02876046696  
AGGGTCAC -0.384644229606  
AGGGTCAG -1.90740669872  
AGGGTCAT -0.680530315278  
AGGGTCCA -0.764436662941  
AGGGTCCC -1.37494526988  
AGGGTCCG -0.907081471804  
AGGGTCGA -0.890225716186  
AGGGTCGC -1.00516598976  
AGGGTCGG -0.926927079736  
AGGGTCTA -0.235660817257  
AGGGTCTC -1.19572941689  
AGGGTCTG -0.546564238704  
AGGGTGAA 0.570267801175  
AGGGTGAC 0.568909231603  
AGGGTGAG -0.803011628415  
AGGGTGAT 0.00697562814011  
AGGGTGCA -0.2555924027  
AGGGTGCC -1.1675831279  
AGGGTGCG 0.185231156055  
AGGGTGGA -0.35359240039  
AGGGTGGC -0.884855556716  
AGGGTGGG -0.827647203754  
AGGGTGTA 0.63418510627  
AGGGTGTC -0.382623862198  
AGGGTGTG 0.141521064064  
AGGGTTAA -0.507309780266  
AGGGTTAC 0.711943333309  
AGGGTTAG -1.07606870736  
AGGGTTAT -0.55993967466  
AGGGTTCA -0.313108650911

AGGGTTCC -1.65654076914  
AGGGTTCCG -1.39082987517  
AGGGTTGA 0.161736187932  
AGGGTTGC -1.11459495918  
AGGGTTGG -0.61913716833  
AGGGTTTA -0.151002947044  
AGGGTTTC -1.01140612505  
AGGGTTTG 0.422558646313  
AGGTAAAA 0.553544030404  
AGGTAAAC 0.906729234642  
AGGTAAAG 0.178541564476  
AGGTAAAT 2.04896398576  
AGGTAACA -0.412976421541  
AGGTAACC -0.39662362395  
AGGTAACG 0.173310884261  
AGGTAACT -0.250534718396  
AGGTAAGA 0.686043076671  
AGGTAAGC 0.93139811846  
AGGTAAGG 0.102523080912  
AGGTAATA 0.266855248398  
AGGTAATC 7.97481588248  
AGGTAATG -0.377693999181  
AGGTACAA -0.808895571168  
AGGTACAC -0.82122865992  
AGGTACAG -0.948112937578  
AGGTACAT -0.380935330509  
AGGTACCA 0.3805693536  
AGGTACCC -1.13553058708  
AGGTACCG -0.0931546549368  
AGGTACCT -1.19055577744  
AGGTACGA -0.153273128042  
AGGTACGC -0.0628435230144  
AGGTACGG -0.510017759579  
AGGTACTA 0.356102818789  
AGGTACTC -0.174752516852  
AGGTACTG 0.336401894561  
AGGTAGAA 1.15211716855  
AGGTAGAC 0.0274099634325  
AGGTAGAG -0.732178650442  
AGGTAGAT 0.582940428232  
AGGTAGCA 0.215151954244  
AGGTAGCC -1.10530959623  
AGGTAGCG -0.514966566794  
AGGTAGGA 0.200783092913  
AGGTAGGC -0.556059653254  
AGGTAGGG -0.331172255236  
AGGTAGTA 0.0692581114673  
AGGTAGTC -0.145052179157  
AGGTAGTG 0.319147686267  
AGGTATAA 0.0556555533229  
AGGTATAC 0.267585328614  
AGGTATAG -0.897399113418  
AGGTATAT 0.599133345124  
AGGTATCA 1.36283180891

AGGTATCC 2.06765295677  
AGGTATCG 0.251481720079  
AGGTATGA -0.180512385522  
AGGTATGC -0.218713463323  
AGGTATGG -0.200189369281  
AGGTATTA 0.426437626829  
AGGTATTC -0.0115130756434  
AGGTATTG 1.3295012634  
AGGTCAAA 0.470833248946  
AGGTCAAC 0.435767331697  
AGGTCAAG -0.983412846889  
AGGTCAAT 0.13027133358  
AGGTCACA -0.989743123255  
AGGTCACC -1.06246281837  
AGGTCACG -0.70396636903  
AGGTCACT -0.305022393186  
AGGTCAGA -0.662969877158  
AGGTCAGC -0.72691757624  
AGGTCAGG -0.640386728638  
AGGTCATA -0.793828689031  
AGGTCATC -0.973377210452  
AGGTCATG -0.827256245486  
AGGTCCAA -0.720438036254  
AGGTCCAC -0.256268356638  
AGGTCCAG -1.53741278709  
AGGTCCAT -1.16176247126  
AGGTCCCA -0.7099106834  
AGGTCCCC -1.95758321549  
AGGTCCCG -1.528906218  
AGGTCCGA 0.323840850908  
AGGTCCGC -0.349038715003  
AGGTCCGG -0.26756909073  
AGGTCCTA -1.54276504326  
AGGTCCTC -1.09388707801  
AGGTCCTG -0.599049241216  
AGGTCGAA -0.839523966349  
AGGTCGAC -0.787160539784  
AGGTCGAG -0.67571661558  
AGGTCGAT 0.105229602979  
AGGTCGCA -0.715332471011  
AGGTCGCC -0.291642793671  
AGGTCGCG -1.37290179471  
AGGTCGGA 0.0540223969794  
AGGTCGGC -1.12465203795  
AGGTCGGG -0.841355516319  
AGGTCGTA -0.371002325821  
AGGTCGTC -0.580645682231  
AGGTCGTG -0.839234390763  
AGGCTAA -0.252815932827  
AGGCTAC -0.776306972018  
AGGCTAG -0.746896418087  
AGGCTAT -0.340512577182  
AGGCTCA -1.16472775857  
AGGCTCC -0.688907605835

AGGTCTCG -0.847536737243  
AGGTCTGA 0.638970493761  
AGGTCTGC -0.6506850857  
AGGTCTGG -0.529005049653  
AGGTCTTA -0.382482925698  
AGGTCTTC -0.537502250733  
AGGTCTTG -0.146432815596  
AGGTGAAA -0.0728150406306  
AGGTGAAC -0.890756361886  
AGGTGAAG -0.552404880434  
AGGTGAAT 0.378858546865  
AGGTGACA 0.352075615543  
AGGTGACC -0.728521379487  
AGGTGACG 0.67280920175  
AGGTGACT -0.710920346659  
AGGTGAGA 0.597481244584  
AGGTGAGC -0.188384428093  
AGGTGAGG -0.782300000038  
AGGTGATA -0.16275417831  
AGGTGATC 1.0254560577  
AGGTGATG -0.670555050458  
AGGTGCAA -0.183399814264  
AGGTGCAC -0.509411753446  
AGGTGCAG -1.14588619309  
AGGTGCAT -0.525599257711  
AGGTGCCA -1.11874602833  
AGGTGCCC -1.64650763084  
AGGTGCCG -1.32995405053  
AGGTGCGA -0.183661702177  
AGGTGCGC -0.644651046616  
AGGTGCGG -0.93066637282  
AGGTGCTA -0.286174582367  
AGGTGCTC -0.901434227427  
AGGTGCTG 0.50051922236  
AGGTGGAA 0.336593418313  
AGGTGGAC -0.501025511235  
AGGTGGAG -0.668712675233  
AGGTGGAT 1.59940153128  
AGGTGGCA -1.53745442269  
AGGTGGCC -1.49277817664  
AGGTGGCG -0.918711959834  
AGGTGGGA -0.28920502939  
AGGTGGGC -0.778394164561  
AGGTGGGG -1.05362462174  
AGGTGGTA -0.419618548538  
AGGTGGTC -1.1320352786  
AGGTGGTG -0.730211784778  
AGGTGTAA 0.505348327229  
AGGTGTAC -0.4835579205  
AGGTGTAG -0.725662679307  
AGGTGTAT 0.301021628545  
AGGTGTCA -0.718587125731  
AGGTGTCC -0.28476875639  
AGGTGTCG -0.668310267175

AGGTGTGA 0.0879930898149  
AGGTGTGC -0.250283239382  
AGGTGTGG 0.218592303732  
AGGTGTTA 0.541660189758  
AGGTGTTC -0.420615096584  
AGGTGTTG 1.08611350363  
AGGTTAAA -0.0664443777338  
AGGTTAAC 0.145427107719  
AGGTTAAG -0.0290068968055  
AGGTTAAT -0.0181930910356  
AGGTTACA 1.04854674417  
AGGTTACC -0.670440136206  
AGGTTACG 0.608094158592  
AGGTTACT -0.261282323564  
AGGTTAGA 0.909278374148  
AGGTTAGC -0.77935719595  
AGGTTAGG -0.514512114238  
AGGTTATA 0.644907938258  
AGGTTATC -0.267879692294  
AGGTTATG 0.295384376712  
AGGTTCAA -0.0969028996742  
AGGTTCAC -0.39426871451  
AGGTTCAG -0.8824588035  
AGGTTCAT -0.0514137185676  
AGGTTCCA -0.534971639068  
AGGTTCCC -0.94520115201  
AGGTTCCG -1.00679831339  
AGGTTCGA 0.300927532093  
AGGTTCGC -0.133817645666  
AGGTTCGG 0.744656839254  
AGGTTCTA 0.443631255327  
AGGTTCTC -1.03420994225  
AGGTTCTG -0.0209014867054  
AGGTTGAA 0.419217181371  
AGGTTGAC -0.337676776581  
AGGTTGAG -0.419582741924  
AGGTTGAT 0.516192735164  
AGGTTGCA -0.474081658326  
AGGTTGCC -0.703932019661  
AGGTTGCG 0.718928121281  
AGGTTGGA 0.543836274303  
AGGTTGGC -0.579179276459  
AGGTTGGG 0.155338253718  
AGGTTGTA -0.0885709919193  
AGGTTGTC -0.723785746535  
AGGTTGTG -0.488384735412  
AGGTTTAA -0.391798058107  
AGGTTTAC -1.3667318154  
AGGTTTAG -1.13277264505  
AGGTTTAT 0.461373224655  
AGGTTTCA 0.134202150416  
AGGTTTCC 0.357165567436  
AGGTTTCG -0.135166222695  
AGGTTTGA 0.672684294955

AGGTTTGC 0.0591958282469  
AGGTTTGG -0.363345122937  
AGGTTTTA 0.673899221714  
AGGTTTTC 0.508100023921  
AGGTTTTG 0.990347255787  
AGTAAAAA 1.5227266625  
AGTAAAAC 1.28208497862  
AGTAAAAG 0.949938866741  
AGTAAAAT 3.83178573274  
AGTAAACA 0.128054862504  
AGTAAACC -0.288263232156  
AGTAAACG -0.401408595085  
AGTAAACT -0.132621038571  
AGTAAAGA 0.491732237515  
AGTAAAGC -0.265050969745  
AGTAAAGG -0.626264766404  
AGTAAATA 1.08144219768  
AGTAAATC 2.29813763645  
AGTAAATG 0.430061381127  
AGTAACAA 0.823565041519  
AGTAACAC 0.0414703049802  
AGTAACAG -0.603482599723  
AGTAACAT 1.04539451302  
AGTAACCA 0.480453986646  
AGTAACCC 0.0169802460569  
AGTAACCG 0.406464613966  
AGTAACGA 0.190750370967  
AGTAACGC 0.280297509488  
AGTAACGG -0.801081610256  
AGTAACTA 0.824348207123  
AGTAACTC -0.498854006606  
AGTAACTG 0.691465488817  
AGTAAGAA 1.3717299608  
AGTAAGAC 0.811761349399  
AGTAAGAG -1.0180724007  
AGTAAGAT 1.93326906697  
AGTAAGCA 0.94019592856  
AGTAAGCC -0.994030548991  
AGTAAGCG 0.423194005543  
AGTAAGGA 0.115714487523  
AGTAAGGC -0.75271499295  
AGTAAGGG -1.06125434513  
AGTAAGTA 1.25901302818  
AGTAAGTC -0.664378409449  
AGTAAGTG 0.725715140161  
AGTAATAA 0.570976855414  
AGTAATAC 2.62565033077  
AGTAATAG -0.467810088153  
AGTAATAT 3.68661593302  
AGTAATCA 4.39240032045  
AGTAATCC 6.94264150464  
AGTAATCG 3.68774030235  
AGTAATGA 0.32560994748  
AGTAATGC -0.479250093321



AGTAATGG 0.00399118845357  
AGTAATTA 3.20439805425  
AGTAATTC 2.0182398287  
AGTAATTG 1.33450919316  
AGTACAAA 1.59205805262  
AGTACAAC 1.19597694052  
AGTACAAG 0.0308909076288  
AGTACAAT 1.98123161079  
AGTACACA -0.563934193961  
AGTACACC 0.0502958027531  
AGTACACG -0.607081164485  
AGTACACT -0.0786916971534  
AGTACAGA 0.130343571343  
AGTACAGC 0.060494858914  
AGTACAGG -0.685138959654  
AGTACATA 1.45418655693  
AGTACATC -0.430526867116  
AGTACATG -0.385276674344  
AGTACCAA 0.132866272245  
AGTACCAC -0.971479876237  
AGTACCAG -0.709109198133  
AGTACCAT -0.754306305517  
AGTACCCA -0.114716065875  
AGTACCCC -0.727027494219  
AGTACCCG 0.00109501623544  
AGTACCGA -0.367964176213  
AGTACCGC -0.0558304228358  
AGTACCGG -0.612976765205  
AGTACCTA -0.550357033532  
AGTACCTC -0.754833828548  
AGTACCTG 0.424149542524  
AGTACGAA 1.28346186786  
AGTACGAC -0.134766520951  
AGTACGAG 0.462438679616  
AGTACGAT 1.19832685369  
AGTACGCA 0.592559084152  
AGTACGCC -0.797176815669  
AGTACGCG 0.659717720575  
AGTACGGA 0.238490788874  
AGTACGGC -0.762670272683  
AGTACGGG -0.674804171443  
AGTACGTA 0.955410408893  
AGTACGTC -0.833035891065  
AGTACGTG 0.2808062965  
AGTACTAA 0.369570269417  
AGTACTAC -0.373897873505  
AGTACTAG -0.108195514825  
AGTACTAT 0.046365402273  
AGTACTCA -0.136624301348  
AGTACTCC -0.575453514944  
AGTACTCG -0.585562638213  
AGTACTGA 0.333410793179  
AGTACTGC -0.040543080206  
AGTACTGG 0.534580888978

AGTACTTA 0.995448865647  
AGTACTTC 0.628832017396  
AGTACTTG 1.77777925967  
AGTAGAAA 0.14879771758  
AGTAGAAC 0.500066018872  
AGTAGAAG -0.578614489568  
AGTAGAAT 2.16923403227  
AGTAGACA 0.659141483894  
AGTAGACC 0.442281221052  
AGTAGACG 0.10618618085  
AGTAGACT 0.683156480641  
AGTAGAGA 0.370548081443  
AGTAGAGC -0.11912069582  
AGTAGAGG 0.116154159441  
AGTAGATA 3.0420566929  
AGTAGATC 1.44615629908  
AGTAGATG 0.977370688863  
AGTAGCAA 0.159337352935  
AGTAGCAC -0.211930191647  
AGTAGCAG -0.111845707728  
AGTAGCAT 0.313451520063  
AGTAGCCA -0.832981348431  
AGTAGCCC -1.16405909086  
AGTAGCCG -0.443693084191  
AGTAGCGA 0.827455471824  
AGTAGCGC -0.475432941669  
AGTAGCGG 0.169801627857  
AGTAGCTA -0.314295057285  
AGTAGCTC -0.531913088016  
AGTAGCTG -0.761724520067  
AGTAGGAA -0.245109391759  
AGTAGGAC 1.35102083056  
AGTAGGAG -0.304471970577  
AGTAGGAT 0.447085552741  
AGTAGGCA 0.10486674874  
AGTAGGCC -1.31069612907  
AGTAGGCG -0.333843595223  
AGTAGGGA 0.327887831064  
AGTAGGGC -0.328613955898  
AGTAGGGG -0.543357048566  
AGTAGGTA 0.259966846836  
AGTAGGTC -1.55015910916  
AGTAGGTG -0.646426804884  
AGTAGTAA 0.708573139805  
AGTAGTAC -0.0114468750421  
AGTAGTAG 0.262978766017  
AGTAGTAT 1.42170641851  
AGTAGTCA -0.291328028548  
AGTAGTCC 0.561170839301  
AGTAGTCG -0.706916042992  
AGTAGTGA 0.876553418414  
AGTAGTGC -0.146510674165  
AGTAGTGG 0.207914230012  
AGTAGTTA 0.899480685155

AGTAGTTC 1.42282704064  
AGTAGTTG 1.43543013625  
AGTATAAA 1.19356270035  
AGTATAAC 1.94201295897  
AGTATAAG 0.345085623122  
AGTATAAT 1.49207682499  
AGTATACA 1.46874361117  
AGTATACC 0.140162078136  
AGTATACG 0.618712901584  
AGTATACT 0.60494858914  
AGTATAGA 0.843305519565  
AGTATAGC -0.459127816838  
AGTATAGG 0.304180521388  
AGTATATA 2.48826409797  
AGTATATC 2.36053753216  
AGTATATG 1.06666780562  
AGTATCAA 1.25097569228  
AGTATCAC 1.29280052438  
AGTATCAG 3.99807060979  
AGTATCAT 1.71825346931  
AGTATCCA 3.49715085297  
AGTATCCC 0.505153888985  
AGTATCCG 3.08369104214  
AGTATCGA 2.15805029421  
AGTATCGC 1.35096795335  
AGTATCGG 2.13438441195  
AGTATCTA 4.54124675168  
AGTATCTC 2.46527437783  
AGTATCTG 6.03982268539  
AGTATGAA 0.93434487793  
AGTATGAC 1.39000257583  
AGTATGAG 0.359968059558  
AGTATGAT 0.996171659634  
AGTATGCA 0.818512561664  
AGTATGCC 0.156225508318  
AGTATGCG -0.0394747107535  
AGTATGGA 0.280447397642  
AGTATGGC -0.7483378425  
AGTATGGG 0.848731678914  
AGTATGTA 1.09853111264  
AGTATGTC -0.285404115621  
AGTATGTG 0.167135284142  
AGTATTAA 7.16132290855E-5  
AGTATTAC 3.31714433997  
AGTATTAG 0.751445523558  
AGTATTAT 2.26234871703  
AGTATTCA 1.1597037991  
AGTATTCC 0.938333568248  
AGTATTCCG 1.08725785805  
AGTATTGA 1.26569679077  
AGTATTGC 0.823155763587  
AGTATTGG 0.547505619582  
AGTATTTA 1.81432490608  
AGTATTTT 2.60017683901

AGTATTTG 3.40363646647  
AGTCAAAA 0.877534144932  
AGTCAAAC 0.482412525191  
AGTCAAAG 0.2325323184  
AGTCAAAT 1.09399491421  
AGTCAACA 0.289933027826  
AGTCAACC -1.11802073621  
AGTCAACG -0.349039964071  
AGTCAACT -0.315524556503  
AGTCAAGA 0.418211265316  
AGTCAAGC -1.16058564107  
AGTCAAGG -0.165604343192  
AGTCAATA -0.476331229702  
AGTCAATC -0.195530762186  
AGTCAATG -0.321921241648  
AGTCACAA -0.43521357824  
AGTCACAC -0.108662249882  
AGTCACAG -0.622370588895  
AGTCACAT -0.784200456923  
AGTCACCA -1.11357655245  
AGTCACCC 0.40143711547  
AGTCACCG -0.84613778114  
AGTCACGA 0.538095141653  
AGTCACGC -0.727321441543  
AGTCACGG -1.09615892443  
AGTCACTA -0.675229062724  
AGTCACTC -0.735562791872  
AGTCACTG 0.0508260320975  
AGTCAGAA -0.115204243265  
AGTCAGAC 0.324964803885  
AGTCAGAG -0.912903169337  
AGTCAGAT 1.07177690988  
AGTCAGCA 0.425633643426  
AGTCAGCC -1.58461756303  
AGTCAGCG -0.0254347706489  
AGTCAGGA 0.0328053124389  
AGTCAGGC -1.12146275112  
AGTCAGGG -0.895547162005  
AGTCAGTA 0.960414591453  
AGTCAGTC -0.819295310912  
AGTCAGTG 0.44159319279  
AGTCATAA 0.629000849747  
AGTCATAC 0.868902044513  
AGTCATAG -0.785275696249  
AGTCATAT 0.757258685793  
AGTCATCA 0.310162724153  
AGTCATCC -0.821910442842  
AGTCATCG -0.903518505479  
AGTCATGA 0.852537797133  
AGTCATGC -0.77664463672  
AGTCATGG -0.955252193619  
AGTCATTA 0.551739751751  
AGTCATTC 0.88580568107  
AGTCATTG 1.20916793078

AGTCCAAA -0.0826997480243  
AGTCCAAC 0.0508066715443  
AGTCCAAG 0.205923215701  
AGTCCAAT -0.114346758118  
AGTCCACA -1.60122392141  
AGTCCACC -1.1098330958  
AGTCCACG -0.550848125414  
AGTCCACT -0.698586217017  
AGTCCAGA 0.0708606656461  
AGTCCAGC -0.217424217021  
AGTCCAGG -0.872070513545  
AGTCCATA 0.433365165853  
AGTCCATC -0.970900933242  
AGTCCATG -0.597681928168  
AGTCCCAA -0.0596908755107  
AGTCCCAC -0.561571581935  
AGTCCCAG -0.26059866704  
AGTCCCAT -0.574770274776  
AGTCCCCA -1.18612283529  
AGTCCCCC -0.337176733046  
AGTCCCCG -1.46648279818  
AGTCCCCGA -0.324467466663  
AGTCCCCGC -1.32353675576  
AGTCCCCGG -1.32784749743  
AGTCCCTA -0.612185688837  
AGTCCCTC -0.400046486487  
AGTCCCTG -0.0224784349912  
AGTCCGAA 1.10824948582  
AGTCCGAC 0.0944909494644  
AGTCCGAG -0.924506802406  
AGTCCGAT 0.091749453494  
AGTCCGCA 0.390520261595  
AGTCCGCC -0.950726404083  
AGTCCGCG -0.830724074469  
AGTCCGGA 0.368466926062  
AGTCCGGC -1.06112298481  
AGTCCGGG -1.45453338146  
AGTCCGTA -0.429487434405  
AGTCCGTC -0.977460413577  
AGTCCGTG -0.490331824166  
AGTCCTAA -0.108195514825  
AGTCCTAC -0.461314934817  
AGTCCTAG -0.757443756028  
AGTCCTAT -0.93724188286  
AGTCCTCA -0.509766280566  
AGTCCTCC -1.27825825078  
AGTCCTCG -1.6252016543  
AGTCCTGA 1.24764317899  
AGTCCTGC -1.07583096809  
AGTCCTGG -0.350762428773  
AGTCCTTA -0.162373004408  
AGTCCTTC 0.264825721158  
AGTCCTTG -0.62583196436  
AGTCGAAA 1.7427949482

AGTCGAAC 0.303469385369  
AGTCGAAG -0.368332234902  
AGTCGAAT 0.943984976184  
AGTCGACA 0.295241982966  
AGTCGACC -0.567978467802  
AGTCGACG -0.367193501288  
AGTCGACT 0.0819107534364  
AGTCGAGA 0.781459793664  
AGTCGAGC -1.61287834991  
AGTCGAGG -0.890497180287  
AGTCGATA 1.09970711012  
AGTCGATC 0.541680383023  
AGTCGATG 0.0716544483278  
AGTCGCAA 2.13427699211  
AGTCGCAC -0.523590964627  
AGTCGCAG -0.750142121153  
AGTCGCAT -0.309457000762  
AGTCGCCA -0.628081327558  
AGTCGCCC -1.54833526178  
AGTCGCCG -1.31366245727  
AGTCGCGA 1.48951540298  
AGTCGCGC 0.111181203579  
AGTCGCGG -0.116379616206  
AGTCGCTA 0.0249378497831  
AGTCGCTC -0.53531659  
AGTCGCTG -0.466055147685  
AGTCGGAA 0.305994168051  
AGTCGGAC 0.572967453369  
AGTCGGAG -0.665847313357  
AGTCGGAT -0.164229743914  
AGTCGGCA -0.519257947911  
AGTCGGCC -1.45209103727  
AGTCGGCG -0.699624192483  
AGTCGGGA 0.740008641059  
AGTCGGGC -0.95665448057  
AGTCGGGG -0.259009852609  
AGTCGGTA -1.03893100274  
AGTCGGTC -0.592709388662  
AGTCGGTG -0.105373870327  
AGTCGTAA -0.0772914919824  
AGTCGTAC -0.413313253531  
AGTCGTAG -1.27401891416  
AGTCGTAT 0.988816314837  
AGTCGTCA -0.764668573224  
AGTCGTCC -0.392865594847  
AGTCGTCC -1.0013394701  
AGTCGTGA 0.0697746010643  
AGTCGTGC 0.184810428335  
AGTCGTGG 0.0911465700305  
AGTCGTTA 1.92192628092  
AGTCGTTC 0.086859768829  
AGTCGTTG 0.377976704893  
AGTCTAAA 0.123716016805  
AGTCTAAC -0.306166539428

AGTCTAAG 0.525997918565  
AGTCTAAT 0.44459907481  
AGTCTACA 0.971323118209  
AGTCTACC -0.359108284453  
AGTCTACG -0.528015579659  
AGTCTAGA 1.04855881849  
AGTCTAGC -1.23492350371  
AGTCTAGG -1.27433055662  
AGTCTATA -0.528714224998  
AGTCTATC -0.200547227248  
AGTCTATG -0.446684810107  
AGTCTCAA 1.81127551486  
AGTCTCAC 0.0512536296921  
AGTCTCAG -0.385997178373  
AGTCTCAT -0.0347711372129  
AGTCTCCA -0.570853197687  
AGTCTCCC -1.0324358494  
AGTCTCCG -0.534930003469  
AGTCTCGA 0.703609343775  
AGTCTCGC 0.911570830191  
AGTCTCGG -1.23569438681  
AGTCTCTA -0.589230734424  
AGTCTCTC -1.02274453936  
AGTCTCTG 0.565932910858  
AGTCTGAA -0.0521744009486  
AGTCTGAC 0.884371334708  
AGTCTGAG 0.385546889377  
AGTCTGAT 0.552577668167  
AGTCTGCA 0.108241313983  
AGTCTGCC -1.7739367103  
AGTCTGCG -0.0930722164521  
AGTCTGGA -0.327568902381  
AGTCTGGC -1.03302582583  
AGTCTGGG -0.701227163017  
AGTCTGTA 0.636649100978  
AGTCTGTC -0.472709349006  
AGTCTGTG -0.597892187939  
AGTCTTAA -0.347882494438  
AGTCTTAC 0.841158996295  
AGTCTTAG -0.417083356958  
AGTCTTAT -0.0203146329472  
AGTCTTCA 0.712135689774  
AGTCTTCC -0.103913918073  
AGTCTTCG -0.852968101042  
AGTCTTGA 0.811918731961  
AGTCTTGC 0.467103323872  
AGTCTTGG -0.352883554328  
AGTCTTTA 1.17728151599  
AGTCTTTC 0.86922992485  
AGTCTTTG 0.439404201209  
AGTGAAAA 0.486326271432  
AGTGAAAC -0.149822786011  
AGTGAAAG 0.0591958282469  
AGTGAAAT 1.89512211544

AGTGAACA -0.218740110106  
AGTGAACC -1.06972011133  
AGTGAACG -0.356292260762  
AGTGAACT -0.464322482261  
AGTGAAGA -0.101389135392  
AGTGAAGC -1.37252415984  
AGTGAAGG -1.39023302886  
AGTGAATA 0.900688117506  
AGTGAATC 1.65726980847  
AGTGAATG -0.0649315482694  
AGTGACAA -0.263373887845  
AGTGACAC 0.0176609880892  
AGTGACAG -0.625885257926  
AGTGACAT 0.529048975209  
AGTGACCA 0.878554841625  
AGTGACCC -0.388205322329  
AGTGACCG -0.782558973459  
AGTGACGA 0.184116362911  
AGTGACGC -1.09885753573  
AGTGACGG -1.0617312809  
AGTGACTA -0.268522962288  
AGTGACTC -0.599476838811  
AGTGACTG -0.322462712604  
AGTGAGAA 0.0506442927109  
AGTGAGAC -0.765231486513  
AGTGAGAG 0.129785446148  
AGTGAGAT 3.26139635562  
AGTGAGCA 1.3236716551  
AGTGAGCC -0.905814500547  
AGTGAGCG -0.192020048537  
AGTGAGGA 0.298293455966  
AGTGAGGC -1.06286481007  
AGTGAGGG -1.18710293728  
AGTGAGTA 0.627505090878  
AGTGAGTC -0.284286616162  
AGTGAGTG -0.383144931711  
AGTGATAA -0.539158514833  
AGTGATAC 1.60285811865  
AGTGATAG 0.657879092554  
AGTGATAT 4.01729980269  
AGTGATCA 0.948128967283  
AGTGATCC 0.608042114094  
AGTGATCG -0.0131424847831  
AGTGATGA 1.07249554031  
AGTGATGC 1.10210469605  
AGTGATGG -0.322351961913  
AGTGATTA 2.77342964162  
AGTGATTC 4.16558019796  
AGTGATTG 2.5251586507  
AGTGCAAA 0.922270138065  
AGTGCAAC 0.324007185124  
AGTGCAAG 2.47586751493  
AGTGCAAT 2.35070237113  
AGTGCACA 0.230480932472



AGTGCACC -0.961281236432  
AGTGCACG -0.692770556646  
AGTGCACT 1.14764196627  
AGTGCAGA 0.200071540537  
AGTGCAGC -0.620009225937  
AGTGCAGG -1.34731505413  
AGTGCATA 0.0902155980524  
AGTGCATC 0.727423865115  
AGTGCATG 0.233039439988  
AGTGCCAA -1.09147179695  
AGTGCCAC -1.16038828833  
AGTGCCAG -1.18350895243  
AGTGCCAT -0.885301682152  
AGTGCCCA -0.767142976831  
AGTGCCCC -0.820271457515  
AGTGCCCG -1.14796214402  
AGTGCCGA -0.768198022892  
AGTGCCGC -1.12240663014  
AGTGCCGG -0.770821273763  
AGTGCCTA -0.35981858776  
AGTGCCTC -1.13310198263  
AGTGCCTG -1.09222769124  
AGTGCGAA 1.02596317929  
AGTGCGAC 0.4849323116  
AGTGCGAG 0.174360309516  
AGTGCGAT 2.83301788538  
AGTGCGCA 0.427353193636  
AGTGCGCC 0.00507746121336  
AGTGCGCG 0.485560176423  
AGTGCGGA -0.424976217328  
AGTGCGGC -0.982738766553  
AGTGCGGG -0.896132350339  
AGTGCGTA 0.717019753633  
AGTGCGTC -0.336269077003  
AGTGCGTG -0.239579976126  
AGTGCTAA -0.472728917737  
AGTGCTAC 0.884499572351  
AGTGCTAG -0.473078656763  
AGTGCTAT 0.516598682247  
AGTGCTCA 0.108137224987  
AGTGCTCC -0.561809529379  
AGTGCTCG -0.748455671243  
AGTGCTGA 0.769514956866  
AGTGCTGC -0.409379522203  
AGTGCTGG -0.342361197747  
AGTGCTTA 0.4916633306  
AGTGCTTC -0.877063870849  
AGTGCTTG -0.701495712627  
AGTGGAAG 0.246226683039  
AGTGGAAC 0.025725387125  
AGTGGAAG -0.888275504761  
AGTGGAAT 1.71103968555  
AGTGGACA 1.03015754946  
AGTGGACC -0.239724243474

AGTGGACG -0.360650467014  
AGTGGAGA 0.460262178714  
AGTGGAGC -0.891325312337  
AGTGGAGG -1.18762504768  
AGTGGATA 2.06986172526  
AGTGGATC 2.05635534535  
AGTGGATG 0.225597076791  
AGTGGCAA 0.431092486719  
AGTGGCAC -1.03100670749  
AGTGGCAG -0.121074654449  
AGTGGCAT -0.773237595711  
AGTGGCCA -0.725260895783  
AGTGGCCC -1.50782611458  
AGTGGCCG -0.98515612939  
AGTGGCGA 0.16581293754  
AGTGGCGC -1.11515620705  
AGTGGCGG -0.548836917837  
AGTGGCTA 0.212424822555  
AGTGGCTC -1.28072724176  
AGTGGCTG -0.99155760263  
AGTGGGAA -0.571658846515  
AGTGGGAC -0.287002089884  
AGTGGGAG -0.497038278164  
AGTGGGAT 1.98580361584  
AGTGGGCA -0.367193501288  
AGTGGGCC -1.11873437037  
AGTGGGCG -0.798838284219  
AGTGGGGA -0.577249050121  
AGTGGGGC -1.1731487665  
AGTGGGGG -1.15252290746  
AGTGGGTA 0.166703522988  
AGTGGGTC -1.14266380596  
AGTGGGTG -1.00577740852  
AGTGGTAA -0.450753232595  
AGTGGTAC -0.556372752953  
AGTGGTAG 0.288812405698  
AGTGGTAT 0.914616057851  
AGTGGTCA 0.352031481809  
AGTGGTCC -0.84765102696  
AGTGGTCG -0.906129057492  
AGTGGTGA 1.11800616375  
AGTGGTGC -0.590579311453  
AGTGGTGG -0.146404087034  
AGTGGTTA -0.000377634876631  
AGTGGTTC 0.498134127111  
AGTGGTTG -0.476299794826  
AGTGTAAG 1.2761071476  
AGTGTAAC 1.14151237349  
AGTGTAAG 0.0149192839408  
AGTGTAAT 3.16118155228  
AGTGTAACA 0.531540865767  
AGTGTAACC -0.935976993384  
AGTGTAACG -0.633646341628  
AGTGTAGA 0.971323118209

AGTGTAGC -0.350696228171  
AGTGTAGG -0.432447309088  
AGTGTATA 1.85010279206  
AGTGTATC 1.28772306317  
AGTGTATG 0.308707559992  
AGTGTCAA -0.440125121594  
AGTGTCCAC -0.612992586732  
AGTGTCCAG 0.436870050518  
AGTGTCCAT 0.150795809943  
AGTGTCCA -0.381689351194  
AGTGTCCC -0.739359125726  
AGTGTCCG -1.32293741132  
AGTGTCCGA -1.00129242187  
AGTGTCCG 0.66077443206  
AGTGTCCG -0.89198523657  
AGTGTCTA 0.534129350914  
AGTGTCTC -0.0214537829169  
AGTGTCTG -0.163803395388  
AGTGTGAA -0.518104850016  
AGTGTGAC 0.188559713962  
AGTGTGAG -0.58779139179  
AGTGTGAT 2.09667775688  
AGTGTGCA 0.424042330858  
AGTGTGCC -1.39769454444  
AGTGTGCG -0.0543148870575  
AGTGTGGA 1.50421859817  
AGTGTGGC -0.758604764686  
AGTGTGGG 0.166497426776  
AGTGTGTA 0.483919942027  
AGTGTGTC 0.138765620169  
AGTGTGTG -1.12189763495  
AGTGTTAA -0.116463511936  
AGTGTTAC 1.20588642109  
AGTGTTAG -0.495046014785  
AGTGTTAT 0.527082942257  
AGTGTTCA 0.677477385032  
AGTGTTCC 0.301822697456  
AGTGTTCCG -0.618676678613  
AGTGTTGA 0.877314933507  
AGTGTTGC 0.00644373337175  
AGTGTTGG 0.276932312255  
AGTGTTTA 1.01113882451  
AGTGTTTC 1.22872479583  
AGTGTTTG 0.932909698856  
AGTTAAAA 0.942203805288  
AGTTAAAC -0.174778330923  
AGTTAAAG -0.0228233859231  
AGTTAAAT 0.979275101129  
AGTTAACA 0.721091923325  
AGTTAACC 0.19474155942  
AGTTAACG 0.314246759991  
AGTTAACT 1.13488565166  
AGTTAAGA 0.201688667176  
AGTTAAGC -0.0865574943853

AGTTAAGG -1.03123320514  
AGTTAATA 0.925930323513  
AGTTAATC -0.403773705247  
AGTTAATG 0.405557790635  
AGTTACAA 0.787248182719  
AGTTACAC -0.376373942536  
AGTTACAG 0.117670944287  
AGTTACAT 0.916332485391  
AGTTACCA 0.188985646133  
AGTTACCC 0.140275535141  
AGTTACCG 0.634244436998  
AGTTACGA 0.246576838421  
AGTTACGC 0.711712255739  
AGTTACGG 0.681563919006  
AGTTACTA 0.828430993893  
AGTTACTC -0.0886309471809  
AGTTACTG 0.151105786972  
AGTTAGAA 0.567483212361  
AGTTAGAC -0.15195910856  
AGTTAGAG 0.282719868598  
AGTTAGAT 2.94636309918  
AGTTAGCA 2.31546595611  
AGTTAGCC -0.357804049336  
AGTTAGCG 0.437794568979  
AGTTAGGA 0.885231317991  
AGTTAGGC -0.602533724438  
AGTTAGGG -1.00485518002  
AGTTAGTA 1.9002757698  
AGTTAGTC 0.241833294706  
AGTTAGTG 1.99393379912  
AGTTATAA 0.374913573926  
AGTTATAC 0.737077494938  
AGTTATAG -0.249792563856  
AGTTATAT 1.80977788239  
AGTTATCA 1.06863800213  
AGTTATCC 0.494167711838  
AGTTATCG -0.316256926677  
AGTTATGA 1.42993486181  
AGTTATGC 1.06136801031  
AGTTATGG 0.151676819203  
AGTTATTA 0.331295704785  
AGTTATTC 1.45807990173  
AGTTATTG 0.465302167889  
AGTTCAAA 0.459551667229  
AGTTCAAC -0.331607971772  
AGTTCAAG 1.44451710558  
AGTTCAAT 0.925423410103  
AGTTCACA -0.106468053851  
AGTTCACC -0.427044465674  
AGTTCACG -0.0677340403914  
AGTTCAGA -0.177656183478  
AGTTCAGC -0.782754660771  
AGTTCAGG -0.707481246239  
AGTTCATA -0.262051957599

AGTTCATC -0.589735149697  
AGTTCATG -0.346175851263  
AGTTCCAA -0.658082482451  
AGTTCCAC -0.501334863731  
AGTTCCAG 0.385998219263  
AGTTCCAT -0.0943843623327  
AGTTCCCA -0.53173030774  
AGTTCCCC 0.105010391554  
AGTTCCCG -1.17248988316  
AGTTCCGA -0.10737924892  
AGTTCCGC -0.325216282898  
AGTTCCGG -0.630042364239  
AGTTCCTA 0.555035625713  
AGTTCCTC -0.494885925909  
AGTTCCTG -0.0718016301678  
AGTTCCGAA 0.386527824073  
AGTTCCGAC -0.18491868089  
AGTTCCGAG 0.886850734587  
AGTTCCGAT 1.31180426051  
AGTTCCGCA 0.270085962648  
AGTTCCGCC -0.180371240843  
AGTTCCGCG -0.610326659373  
AGTTCCGGA 0.610780487394  
AGTTCCGGC -0.526883091385  
AGTTCCGGG -0.830254633098  
AGTTCCGTA 0.961536670827  
AGTTCCGTC -0.462858366447  
AGTTCCGTG -0.475152109558  
AGTTCTAA -0.174548086064  
AGTTCTAC 0.18594479021  
AGTTCTAG -0.00158923078732  
AGTTCTAT 0.983748013455  
AGTTCTCA -0.698489206073  
AGTTCTCC -0.279606358557  
AGTTCTCG -1.42597510823  
AGTTCTGA 1.14453553428  
AGTTCTGC 0.679003746066  
AGTTCTGG -0.300630253921  
AGTTCTTA 0.230471356284  
AGTTCTTC 0.0823489681086  
AGTTCTTG -0.260535589109  
AGTTGAAA 1.30340989936  
AGTTGAAC -0.800063828055  
AGTTGAAG 0.0442261652321  
AGTTGAAT -0.0937163191579  
AGTTGACA 0.704296331147  
AGTTGACC -0.477204328199  
AGTTGACG -0.253568912622  
AGTTGAGA 0.175901243009  
AGTTGAGC -0.613753269113  
AGTTGAGG -0.641113269828  
AGTTGATA 1.08008487717  
AGTTGATC 0.00704120420744  
AGTTGATG -0.788575317415

AGTTGCAA 0.219391290863  
AGTTGCAC -0.122697401892  
AGTTGCAG 0.62343042305  
AGTTGCAT 0.0412500526652  
AGTTGCCA -0.0565211574117  
AGTTGCCC -0.160594331648  
AGTTGCCG -0.640631962312  
AGTTGCGA 0.55226852385  
AGTTGCGC -0.488894355135  
AGTTGCGG 0.504921562347  
AGTTGCTA 0.0903546609507  
AGTTGCTC -0.769376518502  
AGTTGCTG 0.256343300715  
AGTTGGAA 0.674492737168  
AGTTGGAC -0.840317124497  
AGTTGGAG -0.159497649989  
AGTTGGAT 2.33901088695  
AGTTGGCA -0.656727035549  
AGTTGGCC -0.241782915632  
AGTTGGCG -1.22627662265  
AGTTGGGA 0.576335148738  
AGTTGGGC -0.394914898996  
AGTTGGGG 0.743793525123  
AGTTGGTA 2.36939946108  
AGTTGGTC 0.270375746412  
AGTTGGTG -1.28530840664  
AGTTGTAA 0.567027302559  
AGTTGTAC -0.740918795238  
AGTTGTAG 0.643951152208  
AGTTGTAT 1.07787943953  
AGTTGTCA 0.0674833940896  
AGTTGTCC -0.12541537375  
AGTTGTCCG 0.196520856714  
AGTTGTGA 1.56740790483  
AGTTGTGC -0.313328695048  
AGTTGTGG -0.439059458455  
AGTTGTTA 1.4226259407  
AGTTGTTC 2.06438206417  
AGTTGTTG 0.565347306168  
AGTTTAAA 0.636439673918  
AGTTTAAC 1.18595212934  
AGTTTAAG 0.454254994591  
AGTTTAAT 0.594959584572  
AGTTTACA -0.00526648682966  
AGTTTACC 0.267547440219  
AGTTTACG -1.07468973634  
AGTTTAGA 1.28304509552  
AGTTTAGC -0.236331566746  
AGTTTAGG 0.635820344393  
AGTTTATA 2.3384579662  
AGTTTATC -0.301285598238  
AGTTTATG 0.402449693221  
AGTTTCAA 0.00824926109227  
AGTTTCAC -0.080078578933

AGTTTCAG 0.70825129663  
AGTTTCAT 0.372420434299  
AGTTTCCA 0.633515397671  
AGTTTCCC 0.234435481599  
AGTTTCCG -0.378411796895  
AGTTTCGA -0.247584836256  
AGTTTCGC 0.541680383023  
AGTTTCGG -0.170476332728  
AGTTTCTA 0.947535035473  
AGTTTCTC -0.402732398934  
AGTTTCTG 0.621810173742  
AGTTTGAA -0.294933671361  
AGTTTGAC -0.231654639988  
AGTTTGAG 0.494153139379  
AGTTTGAT 0.805315742425  
AGTTTGCA 0.480278700778  
AGTTTGCC -0.552876403585  
AGTTTGCG -0.548208844837  
AGTTTGGA 1.20101609698  
AGTTTGGC -0.719212908773  
AGTTTGGG 0.833674581143  
AGTTTGTA 0.468538294767  
AGTTTGTC 0.490702172813  
AGTTTGTG -0.933062085146  
AGTTTTAA -0.924493062659  
AGTTTTAC 0.366458632978  
AGTTTTAG 0.123086902915  
AGTTTTAT 1.59274732995  
AGTTTTCA 0.428496923521  
AGTTTTCC 1.08431026586  
AGTTTTCG -0.401258498754  
AGTTTTGA 2.00766313766  
AGTTTTGC 1.47480117436  
AGTTTTGG 0.444996694774  
AGTTTTTA 1.76427766785  
AGTTTTTC 2.93806595715  
AGTTTTTG 1.41580269885  
ATAAAAAA 2.60830764683  
ATAAAAAC 1.52869595823  
ATAAAAAG 0.956487729999  
ATAAAAAT 3.48368423506  
ATAAAACA 1.18942412188  
ATAAAACC 0.588675107364  
ATAAAACG 0.996255555364  
ATAAAAGA 1.78539024704  
ATAAAAGC -0.224070507579  
ATAAAAGG -0.589043582409  
ATAAAATA 1.80370907758  
ATAAAATC 7.47785712831  
ATAAAATG -0.125049605019  
ATAAACAA 1.36167912737  
ATAAACAC 0.219176867532  
ATAAACAG 0.178928151006  
ATAAACAT 1.40247972375

ATAAACCA 2.64966574387  
ATAAACCC -0.853387787873  
ATAAACCG -0.896140469281  
ATAAACGA 0.860363832369  
ATAAACGC -0.145808281622  
ATAAACGG 0.667888082208  
ATAAACTA 0.601859435924  
ATAAACTC 1.94057902896  
ATAAACTG 0.446328617563  
ATAAAGAA 1.59556418636  
ATAAAGAC 2.66919533761  
ATAAAGAG 2.37587879289  
ATAAAGAT 2.77558303476  
ATAAAGCA 0.728421870407  
ATAAAGCC -0.526011658312  
ATAAAGCG -0.244041438662  
ATAAAGGA 1.80173804836  
ATAAAGGC -0.116826366175  
ATAAAGGG 0.438807146729  
ATAAAGTA 0.889429643546  
ATAAAGTC -0.215933038068  
ATAAAGTG 0.476039988692  
ATAAATAA 1.49574200671  
ATAAATAC 1.29384037345  
ATAAATAG 0.756581482787  
ATAAATAT 2.39475304231  
ATAAATCA 4.9271252686  
ATAAATCC 3.2583119905  
ATAAATCG 1.18291189795  
ATAAATGA 1.02613034622  
ATAAATGC 0.650508342586  
ATAAATGG -0.192974128272  
ATAAATTA 3.23834001852  
ATAAATTC 3.75973949343  
ATAAATTG 1.3788365329  
ATAACAAA 0.952514653031  
ATAACAAC 0.951651963434  
ATAACAAG 0.48828439362  
ATAACAAT 0.559916775081  
ATAACACA 2.09972069459  
ATAACACC 0.68253361209  
ATAACACG 2.47243674163  
ATAACAGA 2.34101355923  
ATAACAGC 0.174927386365  
ATAACAGG -0.414773413964  
ATAACATA 1.08008487717  
ATAACATC 1.43374826626  
ATAACATG -0.293323622774  
ATAACCAA 0.24507296061  
ATAACCAC 0.203605570122  
ATAACCAG -0.173415389612  
ATAACCAT 0.276778260542  
ATAACCCA 0.750466254286  
ATAACCCC -0.347898315965



ATAACCCG 0.318033934013  
ATAACCGA 1.00451418447  
ATAACCGC 0.744395784053  
ATAACCGG -0.26507428568  
ATAACCTA 0.0219640271741  
ATAACCTC 1.14945478022  
ATAACCTG 0.289190040575  
ATAACGAA 1.42458218929  
ATAACGAC 0.580078605382  
ATAACGAG 1.46298249343  
ATAACGAT 2.77575082622  
ATAACGCA 2.17066567232  
ATAACGCC -0.659690657436  
ATAACGCG 0.144015660937  
ATAACGGA 0.251325378408  
ATAACGGC -0.340176577904  
ATAACGGG 0.305022393186  
ATAACGTA 2.1182535321  
ATAACGTC 1.0300767764  
ATAACGTG 0.694093111426  
ATAACTAA -0.335867085301  
ATAACTAC 0.815454635147  
ATAACTAG 1.17162885899  
ATAACTAT 1.24552434339  
ATAACTCA 1.01215056955  
ATAACTCC -0.218117241555  
ATAACTCG 0.762329693489  
ATAACTGA 0.395228415051  
ATAACTGC -0.124955508567  
ATAACTGG 0.333051477965  
ATAACTTA 1.75977269612  
ATAACTTC 1.12219491312  
ATAACTTG 1.61115526068  
ATAAGAAA 0.97247559157  
ATAAGAAC 1.59243714475  
ATAAGAAG 1.33754359556  
ATAAGAAT 2.99330473813  
ATAAGACA 1.98123161079  
ATAAGACC -0.986138313154  
ATAAGACG 0.219863854904  
ATAAGAGA 1.4691045918  
ATAAGAGC -0.0986690817544  
ATAAGAGG -0.0406323885643  
ATAAGATA 4.05866435325  
ATAAGATC 3.45495692129  
ATAAGATG 1.01981693227  
ATAAGCAA 1.23259586559  
ATAAGCAC -0.16176845552  
ATAAGCAG -0.243607179372  
ATAAGCAT 1.10606361691  
ATAAGCCA 0.44459907481  
ATAAGCCC -1.04323570725  
ATAAGCCG 0.128517434002  
ATAAGCGA 0.462258605653

ATAAGCGC 0.713367270771  
ATAAGCGG 0.0135463500867  
ATAAGCTA 0.427149179204  
ATAAGCTC 0.43413146904  
ATAAGCTG 0.424752217809  
ATAAGGAA 0.624386584565  
ATAAGGAC 0.883901893337  
ATAAGGAG 0.729790848879  
ATAAGGAT 1.37345762995  
ATAAGGCA 0.588511687641  
ATAAGGCC -0.287014164207  
ATAAGGCG -0.851315375967  
ATAAGGGA 0.0141827502068  
ATAAGGGC -0.739561474733  
ATAAGGGG -0.394637605911  
ATAAGGTA 0.539125206355  
ATAAGGTC 0.498530081651  
ATAAGGTG 0.752926918145  
ATAAGTAA 0.930909108358  
ATAAGTAC 1.41978909921  
ATAAGTAG 0.224320112991  
ATAAGTAT 0.812519325466  
ATAAGTCA 0.627505090878  
ATAAGTCC 0.199599809209  
ATAAGTCG -0.499683179546  
ATAAGTGA 0.259622520438  
ATAAGTGC 0.327467727877  
ATAAGTGG 0.421862707287  
ATAAGTTA 1.3723930077  
ATAAGTTC 1.99637197976  
ATAAGTTG 0.310277222048  
ATAATAAA 2.21640362612  
ATAATAAC 1.22161801556  
ATAATAAG 0.54218230016  
ATAATAAT 1.04839061067  
ATAATACA 2.44818192384  
ATAATACC 1.04282060033  
ATAATACG 1.33303237849  
ATAATAGA 3.05105997468  
ATAATAGC 0.514099089103  
ATAATAGG 0.80722140376  
ATAATATA 2.39174799301  
ATAATATC 4.43868536602  
ATAATATG 1.18725907077  
ATAATCAA 2.19999128963  
ATAATCAC 2.13503392729  
ATAATCAG 2.53667672261  
ATAATCAT 3.04667949338  
ATAATCCA 5.55962933759  
ATAATCCC 1.43478915621  
ATAATCCG 5.09728225629  
ATAATCGA 2.94593591794  
ATAATCGC 2.28334034481  
ATAATCGG 1.37128300265

ATAATCTA 4.58146569875  
ATAATCTC 7.45866415838  
ATAATCTG 4.78668589738  
ATAATGAA 1.43213280504  
ATAATGAC 1.25687878741  
ATAATGAG 1.00414612578  
ATAATGAT 1.59880489315  
ATAATGCA 2.02787264073  
ATAATGCC 0.593008748614  
ATAATGCG 0.745904866313  
ATAATGGA 1.2260813517  
ATAATGGC 0.609538497497  
ATAATGGG 0.28601470167  
ATAATGTA 2.78591012039  
ATAATGTC 2.6321379897  
ATAATGTG 0.495185494039  
ATAATTAA 0.881575296104  
ATAATTAC 2.26893401144  
ATAATTAG 0.769799536181  
ATAATTAT 2.06438206417  
ATAATTCA 2.03265657097  
ATAATTCC 1.22646398285  
ATAATTCG -0.0887648056295  
ATAATTGA 0.375253736764  
ATAATTGC 0.907514482026  
ATAATTGG 1.65155053451  
ATAATTTA 1.94496867009  
ATAATTTT 3.63676563117  
ATAATTTG 0.805810789689  
ATACAAA 3.43746414102  
ATACAAAC 0.95443426229  
ATACAAAG 0.54749229619  
ATACAAAT 3.1927800569  
ATACAACA 1.30303559533  
ATACAACC -0.205154414379  
ATACAACG 0.636667004285  
ATACAAGA 2.20276380412  
ATACAAGC 0.0192947689667  
ATACAAGG -0.284925930774  
ATACAATA 1.57988130554  
ATACAATC 3.49445161713  
ATACAATG 0.627224050589  
ATACACAA 1.43415816872  
ATACACAC 0.110639108089  
ATACACAG 0.715917034812  
ATACACAT 1.65649809266  
ATACACCA 1.04278978999  
ATACACCC 0.833674581143  
ATACACCG 0.527607967151  
ATACACGA 2.30438339255  
ATACACGC 0.625414151131  
ATACACGG 0.658772384315  
ATACACTA 0.761802586814  
ATACACTC 1.36795132208

ATACACTG 0.864295898273  
ATACAGAA 1.66201480943  
ATACAGAC 0.573212687043  
ATACAGAG 1.4315022339  
ATACAGAT 1.91547463679  
ATACAGCA 0.906361592309  
ATACAGCC -0.0280994489404  
ATACAGCG -0.345088329436  
ATACAGGA 1.50846001657  
ATACAGGC 0.572396629317  
ATACAGGG 0.662650532119  
ATACAGTA 1.86382630162  
ATACAGTC -0.0694723266206  
ATACAGTG -0.0291769782246  
ATACATAA 2.44102767898  
ATACATAC 2.80455641491  
ATACATAG 1.65719590528  
ATACATAT 2.2961233062  
ATACATCA 1.07190660477  
ATACATCC 0.898496003255  
ATACATCG -0.0322043025773  
ATACATGA 1.63141972273  
ATACATGC 1.61609011997  
ATACATGG 0.367736013134  
ATACATTA 2.24476184031  
ATACATTC 2.18469187268  
ATACATTG 2.1069538389  
ATACCAA 1.49655390088  
ATACCAAC 0.0515619412975  
ATACCAAG -0.186133607649  
ATACCAAT 0.897773833802  
ATACCACA 1.88568332531  
ATACCACC 1.05342622811  
ATACCACG 1.58232011071  
ATACCAGA 0.109103170868  
ATACCAGC 0.570730372672  
ATACCAGG -0.223344174566  
ATACCATA 1.4315022339  
ATACCATC 0.260503113342  
ATACCATG -0.158929324072  
ATACCCAA 0.595855582648  
ATACCCAC 2.19038845524  
ATACCCAG 1.65123160583  
ATACCCAT 1.42735741009  
ATACCCCA 1.299294845  
ATACCCCC -0.0559699020901  
ATACCCCG 0.810031390289  
ATACCCGA 0.929289483584  
ATACCCGC 0.970431700049  
ATACCCGG -0.156839425215  
ATACCCTA 1.00682204568  
ATACCCTC 1.03226930701  
ATACCCTG 0.0924505969694  
ATACCGAA 4.30634828223

ATACCGAC 0.632133720341  
ATACCGAG 1.03986863641  
ATACCGAT 3.36570893455  
ATACCGCA 2.82597272579  
ATACCGCC 0.54598009126  
ATACCGCG 0.9503639662  
ATACCGGA 0.370662371161  
ATACCGGC 0.561437307131  
ATACCGGG -0.147763489318  
ATACCGTA 2.03127177097  
ATACCGTC 0.342576870146  
ATACCGTG -0.00574696163411  
ATACCTAA 1.7226454004  
ATACCTAC -0.183973136453  
ATACCTAG 1.5562928655  
ATACCTAT 0.85414472305  
ATACCTCA 0.78528901964  
ATACCTCC -0.129365134783  
ATACCTCG -0.0911625997359  
ATACCTGA 0.677177816902  
ATACCTGC 1.61544331095  
ATACCTGG 0.0299160100945  
ATACCTTA 1.01127559745  
ATACCTTC 1.03503370256  
ATACCTTG 0.96000135814  
ATACGAAA 3.17647243393  
ATACGAAC 1.78280883995  
ATACGAAG 0.658301902054  
ATACGAAT 5.27151765901  
ATACGACA 2.1874281642  
ATACGACC 0.257599863072  
ATACGACG 0.745276168779  
ATACGAGA 2.82412181526  
ATACGAGC 0.826916707182  
ATACGAGG 0.624106793344  
ATACGATA 2.94742126791  
ATACGATC 3.73528565748  
ATACGATG 3.01932490529  
ATACGCAA 1.81567556489  
ATACGCAC 1.62962481209  
ATACGCAG 1.01291479096  
ATACGCAT 2.80205807083  
ATACGCCA 0.871495109576  
ATACGCCC -0.218183858512  
ATACGCCG 2.10015932561  
ATACGCGA 0.829586798102  
ATACGCGC 3.67217004583  
ATACGCGG 1.14720604156  
ATACGCTA 2.45216145433  
ATACGCTC 2.5400054887  
ATACGCTG 2.06371672731  
ATACGGAA 0.656747436992  
ATACGGAC 0.903160647511  
ATACGGAG 1.28723238764

ATACGGAT 3.68652121203  
ATACGGCA 1.62581015857  
ATACGGCC -0.273915188624  
ATACGGCG -0.111207225828  
ATACGGGA 0.488492779789  
ATACGGGC 0.30754280413  
ATACGGGG -0.784218568408  
ATACGGTA 2.33528033734  
ATACGGTC 1.30468020147  
ATACGGTG 1.1595145653  
ATACGTAA 1.35030282467  
ATACGTAC 0.646012322503  
ATACGTAG 0.202739757855  
ATACGTAT 2.11097875219  
ATACGTCA 1.15919917565  
ATACGTCC 0.533735478154  
ATACGTCCG 0.545050784706  
ATACGTGA 1.36688669983  
ATACGTGC 3.32529846372  
ATACGTGG 0.629958468508  
ATACGTTA 2.56646407871  
ATACGTTC 1.15352278635  
ATACGTTG 1.36785451931  
ATACTAAA 1.92197332915  
ATACTAAC 1.17494742435  
ATACTAAG 0.813841047534  
ATACTAAT 1.12946969303  
ATACTACA 1.9944817236  
ATACTACC 0.579459275857  
ATACTACG 0.45467593049  
ATACTAGA 2.13689878574  
ATACTAGC 0.580360478383  
ATACTAGG 0.214490780943  
ATACTATA 1.55994888739  
ATACTATC 1.92516761225  
ATACTATG 0.763047283026  
ATACTCAA 3.23214401696  
ATACTCAC 1.77718387062  
ATACTCAG 0.800323217832  
ATACTCAT 3.90729105756  
ATACTCCA 1.89542293264  
ATACTCCC 0.634619781916  
ATACTCCG 1.6270735908  
ATACTCGA 1.53880466515  
ATACTCGC 1.72288001699  
ATACTCGG 1.58883712274  
ATACTCTA 2.44522995992  
ATACTCTC 1.74742649215  
ATACTCTG 1.01076556137  
ATACTGAA 1.89555804016  
ATACTGAC 1.0319222743  
ATACTGAG 1.84895489862  
ATACTGAT 2.12145031334  
ATACTGCA 1.30468020147

ATACTGCC 0.375116755646  
ATACTGCG 0.356041406282  
ATACTGGA 0.764255548088  
ATACTGGC -0.37717272149  
ATACTGGG -0.044055875635  
ATACTGTA 3.73771051473  
ATACTGTC 1.79710921072  
ATACTGTG 1.93857365037  
ATACTTAA 2.51167288041  
ATACTTAC 0.872086335072  
ATACTTAG -0.174778330923  
ATACTTCA 0.964986596503  
ATACTTCC 0.91502242129  
ATACTTCG 0.549989183021  
ATACTTGA 0.363427561421  
ATACTTGC 2.78271771089  
ATACTTGG 0.804449513803  
ATACTTTA 1.40737565375  
ATACTTTC 2.31826511738  
ATACTTTG 0.918203172823  
ATAGAAAA 1.44999676667  
ATAGAAAC 0.216381037106  
ATAGAAAG 0.335371205325  
ATAGAAAT 0.947160315088  
ATAGAACA 0.593128242781  
ATAGAACC 0.514787533721  
ATAGAACG 0.914896889962  
ATAGAAGA 0.758790875811  
ATAGAAGC -0.407585027916  
ATAGAAGG -0.874337988228  
ATAGAATA 1.76561208878  
ATAGAATC 5.54587626675  
ATAGAATG -0.258304337396  
ATAGACAA 1.55689033634  
ATAGACAC 0.236317410642  
ATAGACAG 0.644707462852  
ATAGACAT 1.62306304179  
ATAGACCA -0.702102135116  
ATAGACCC -0.98905342957  
ATAGACCG 0.209698939934  
ATAGACGA 1.28064938319  
ATAGACGC -0.0573522039539  
ATAGACGG 0.180689128636  
ATAGACTA 0.323844598112  
ATAGACTC -0.0492632399151  
ATAGACTG -0.800182905866  
ATAGAGAA 1.23224487749  
ATAGAGAC 0.157690665022  
ATAGAGAG 0.795267198952  
ATAGAGAT 2.75672419051  
ATAGAGCA -0.260177939319  
ATAGAGCC -0.840877956006  
ATAGAGCG -0.875571442828  
ATAGAGGA 1.00940761634

ATAGAGGC -0.379552612289  
ATAGAGGG -0.952545255195  
ATAGAGTA 0.965960453147  
ATAGAGTC -0.170655157623  
ATAGAGTG 0.264916486762  
ATAGATAA 1.23681042902  
ATAGATAC 3.24975212784  
ATAGATAG 1.15617768028  
ATAGATAT 7.91347665363  
ATAGATCA 0.759669803291  
ATAGATCC 1.62037588028  
ATAGATCG 3.17223621998  
ATAGATGA 1.1817640045  
ATAGATGC 1.37727936152  
ATAGATGG 0.257290510577  
ATAGATTA 4.24147939553  
ATAGATTC 10.9945613073  
ATAGATTG 2.64299114111  
ATAGCAAA 1.19728825369  
ATAGCAAC 0.181851802719  
ATAGCAAG -0.976579196139  
ATAGCAAT 2.56411562279  
ATAGCACA 0.540892221147  
ATAGCACC -0.382686523773  
ATAGCACG 1.55917946153  
ATAGCAGA 0.68323850277  
ATAGCAGC -0.0891135037653  
ATAGCAGG 0.146279180239  
ATAGCATA -0.10539843533  
ATAGCATC 0.877764597969  
ATAGCATG -0.549943800218  
ATAGCCAA 0.657145473312  
ATAGCCAC 0.205439618227  
ATAGCCAG -0.892439064592  
ATAGCCAT -0.0832091595696  
ATAGCCCA 0.56656806191  
ATAGCCCC -0.055997381585  
ATAGCCCG -0.0861309376806  
ATAGCCGA 0.634978680774  
ATAGCCGC 0.196110537893  
ATAGCCGG -0.77108794977  
ATAGCCTA -0.705489399216  
ATAGCCTC 0.148230224375  
ATAGCCTG -0.294933671361  
ATAGCGAA 1.57488607464  
ATAGCGAC 1.52885916978  
ATAGCGAG 0.0301785225418  
ATAGCGAT 2.3750302594  
ATAGCGCA 1.18417845285  
ATAGCGCC -0.150157119865  
ATAGCGCG 1.56460416364  
ATAGCGGA 0.470311763077  
ATAGCGGC -0.834263724859  
ATAGCGGG -0.860385066524



ATAGCGTA 2.14150451562  
ATAGCGTC -0.169790178068  
ATAGCGTG 0.516065330233  
ATAGCTAA 0.401854512343  
ATAGCTAC -0.389047194127  
ATAGCTAG -0.481408482738  
ATAGCTAT 0.30591443588  
ATAGCTCA 0.200280967597  
ATAGCTCC -0.770063297696  
ATAGCTCG 0.84594084476  
ATAGCTGA 0.173672905788  
ATAGCTGC 0.422392103919  
ATAGCTGG -1.16421043626  
ATAGCTTA 1.25879569035  
ATAGCTTC 0.501392529034  
ATAGCTTG 1.57687542352  
ATAGGAAA 1.16599410529  
ATAGGAAC 0.653128054431  
ATAGGAAG 0.0404556454495  
ATAGGAAT 2.68062014579  
ATAGGACA 0.263120327052  
ATAGGACC -0.882761702477  
ATAGGACG -0.245829479431  
ATAGGAGA 0.886903611797  
ATAGGAGC 0.256324981052  
ATAGGAGG -0.164538680054  
ATAGGATA 1.7993350498  
ATAGGATC 2.43393588752  
ATAGGATG -0.0702871352795  
ATAGGCAA -0.160553112406  
ATAGGCAC -0.433167813117  
ATAGGCAG 0.118011107125  
ATAGGCAT -0.512092045087  
ATAGGCCA -0.469642470835  
ATAGGCCC -0.776633811465  
ATAGGCCG 0.221762230009  
ATAGGCCG 0.907067732056  
ATAGGCCG -0.338784075318  
ATAGGCCG -0.861936408917  
ATAGGCTA 0.22782041774  
ATAGGCTC -0.0814608807967  
ATAGGCTG 0.336030088668  
ATAGGGAA 0.43750520157  
ATAGGGAC -0.123558634243  
ATAGGGAG 0.0628023037721  
ATAGGGAT 1.52300145745  
ATAGGGCA -0.281946695537  
ATAGGGCC -0.892668893094  
ATAGGGCG -0.404634104886  
ATAGGGGA -0.715253363375  
ATAGGGGC -0.608941026661  
ATAGGGGG -0.764436454763  
ATAGGGTA 0.959297924707  
ATAGGGTC -1.04601821428

ATAGGGTG 0.462711392785  
ATAGGTAA 1.9353762446  
ATAGGTAC -0.212842427606  
ATAGGTAG -0.212404837468  
ATAGGTCA -0.687970388517  
ATAGGTCC -1.20831211105  
ATAGGTCCG -0.801880181031  
ATAGGTGA 0.908773126163  
ATAGGTGC 1.47638124532  
ATAGGTGG -0.736686953026  
ATAGGTTA 0.00902847131456  
ATAGGTTC -0.255033861149  
ATAGGTTG 0.121332795158  
ATAGTAAA 1.17742515881  
ATAGTAAC 0.506078199268  
ATAGTAAG 0.942068281416  
ATAGTAAT 4.45375432994  
ATAGTACA 0.822084479643  
ATAGTACC -0.433511098625  
ATAGTACG 0.321719933531  
ATAGTAGA 3.52167880029  
ATAGTAGC -0.00681970282445  
ATAGTAGG 0.20649029255  
ATAGTATA 0.690481639629  
ATAGTATC 2.05373584168  
ATAGTATG 0.358424419751  
ATAGTCAA 0.95149478905  
ATAGTCAC -0.613494712048  
ATAGTCAG -0.29706999391  
ATAGTCAT -0.0343208482172  
ATAGTCCA 0.686043076671  
ATAGTCCC -0.792569004004  
ATAGTCCG -0.622806929965  
ATAGTCGA 0.719859301437  
ATAGTCGC -0.666038420754  
ATAGTCGG -0.471641395909  
ATAGTCTA 0.475812033791  
ATAGTCTC 1.1817640045  
ATAGTCTG 0.672903298202  
ATAGTGAA 1.41369926843  
ATAGTGAC -0.400354173558  
ATAGTGAG 0.782695121866  
ATAGTGAT 0.759138116701  
ATAGTGCA 0.646420351366  
ATAGTGCC 0.385971156124  
ATAGTGCG 0.553947062995  
ATAGTGGA 1.24233672199  
ATAGTGGC -0.453805538307  
ATAGTGGG -0.448441832355  
ATAGTGTA 1.37123990981  
ATAGTGTC 0.171023216312  
ATAGTGTG 0.460228662058  
ATAGTTAA 0.961159868663  
ATAGTTAC 0.398863619139

ATAGTTAG 1.51199133984  
ATAGTTCA 1.40980842176  
ATAGTTCC -0.281671900589  
ATAGTTCG 0.37524998956  
ATAGTTGA 1.89815651785  
ATAGTTGC 2.87253485626  
ATAGTTGG 0.164376509398  
ATAGTTTA 1.97853445673  
ATAGTTTC 1.60034790843  
ATAGTTTG 0.365904046808  
ATATAAAA 2.42941155523  
ATATAAAC 2.89997896088  
ATATAAAG 1.69824340076  
ATATAAAT 1.95385037592  
ATATAACA 3.19312584054  
ATATAACC 1.20829670588  
ATATAACG 2.26604346003  
ATATAAGA 3.1030311939  
ATATAAGC 1.24240437983  
ATATAAGG 0.681079072463  
ATATAATA 2.32140693963  
ATATAATC 3.92719495533  
ATATAATG 2.6321379897  
ATATACAA 2.28007986111  
ATATACAC 1.14882150277  
ATATACAG 2.62099297274  
ATATACAT 4.6223177151  
ATATACCA 0.508657940939  
ATATACCC 0.595318691608  
ATATACCG 0.622627896892  
ATATACGA 2.15707851935  
ATATACGC 1.78984692148  
ATATACGG 0.820570817466  
ATATACTA 1.59291595413  
ATATACTC 2.74742904319  
ATATACTG 2.46971543893  
ATATAGAA 2.0615071261  
ATATAGAC 1.09168788571  
ATATAGAG 2.17642845548  
ATATAGAT 3.89940610795  
ATATAGCA 2.0305810364  
ATATAGCC 0.0918995498259  
ATATAGCG 0.779348036118  
ATATAGGA 2.20450667027  
ATATAGGC 0.907067732056  
ATATAGGG 0.325754423006  
ATATAGTA 1.65859236325  
ATATAGTC 0.663190545829  
ATATAGTG 2.14565849926  
ATATATAA 1.45182415308  
ATATATAC 2.40437919264  
ATATATAG 1.38058855887  
ATATATAT 2.83462314587  
ATATATCA 3.5411330336

ATATATCC 2.59463347546  
ATATATCG 1.9273124701  
ATATATGA 3.08049217912  
ATATATGC 2.2472666379  
ATATATGG 1.93192319625  
ATATATTA 2.86728148465  
ATATATTC 4.34321285732  
ATATATTG 5.20703556702  
ATATCAAA 1.78369609455  
ATATCAAC 2.5382934329  
ATATCAAG 3.33145220515  
ATATCAAT 4.00739531839  
ATATCACA 7.02119955152  
ATATCACC 2.68222894531  
ATATCACG 4.65331562622  
ATATCAGA 4.02246553137  
ATATCAGC 4.3414073296  
ATATCAGG 4.39771718635  
ATATCATA 3.19877662395  
ATATCATC 2.94256843075  
ATATCATG 6.32817585044  
ATATCCAA 6.99354227263  
ATATCCAC 4.74293645975  
ATATCCAG 6.22831245154  
ATATCCAT 7.1363544566  
ATATCCCA 4.56918007458  
ATATCCCC 3.87991606803  
ATATCCCG 3.90869584264  
ATATCCGA 6.62298336593  
ATATCCGC 7.21671449218  
ATATCCGG 10.2047539925  
ATATCCTA 6.07431652952  
ATATCCTC 5.91810684273  
ATATCCTG 7.03342126505  
ATATCGAA 1.98703519684  
ATATCGAC 3.89030789701  
ATATCGAG 5.17314564725  
ATATCGAT 4.18392463439  
ATATCGCA 4.38948145683  
ATATCGCC 4.2617465639  
ATATCGCG 8.56536854715  
ATATCGGA 3.90701147451  
ATATCGGC 5.41346944334  
ATATCGGG 4.07425896659  
ATATCGTA 4.28616167875  
ATATCGTC 4.9766535191  
ATATCGTG 4.61011223946  
ATATCTAA 5.59294156343  
ATATCTAC 6.57032307755  
ATATCTAG 4.79132014765  
ATATCTCA 6.5854617811  
ATATCTCC 5.36010655423  
ATATCTCG 10.0211893013  
ATATCTGA 5.27666548438

ATATCTGC 10.51508201  
ATATCTGG 5.75981204517  
ATATCTTA 8.14854166548  
ATATCTTC 8.81897555635  
ATATCTTG 10.5624795588  
ATATGAAA 2.57366786993  
ATATGAAC 1.51840696918  
ATATGAAG 2.25040096574  
ATATGAAT 4.01976317286  
ATATGACA 1.19813345633  
ATATGACC 0.175979517934  
ATATGACG 0.878352076261  
ATATGAGA 2.9576105397  
ATATGAGC 0.940908938181  
ATATGAGG 0.619786683664  
ATATGATA 2.85623576859  
ATATGATC 1.16984165093  
ATATGATG 1.52422554404  
ATATGCAA 1.51452528235  
ATATGCAC 4.1282782409  
ATATGCAG 1.95016042102  
ATATGCAT 2.44345503436  
ATATGCCA 2.55645383999  
ATATGCCC 1.0567237675  
ATATGCCG 2.15658243119  
ATATGCCG 3.51990096024  
ATATGCGC 1.5807585676  
ATATGCGG 0.615993056124  
ATATGCTA 1.53546299203  
ATATGCTC 2.11204150084  
ATATGCTG 3.72023105785  
ATATGGAA 2.77213310908  
ATATGGAC 1.61507192141  
ATATGGAG 1.15268029002  
ATATGGAT 1.90394469873  
ATATGGCA 1.84972432448  
ATATGGCC -0.376473659794  
ATATGGCG 1.11238202713  
ATATGGGA 2.38286441357  
ATATGGGC 1.28720990442  
ATATGGGG 0.651448474395  
ATATGGTA 3.0267085623  
ATATGGTC 0.321396424932  
ATATGGTG 2.48229584313  
ATATGTAA 0.807015723904  
ATATGTAC 1.2223516348  
ATATGTAG 1.63686024636  
ATATGTCA 1.08657753237  
ATATGTCC -0.354000012897  
ATATGTCC 0.871824863514  
ATATGTGA 2.05096436808  
ATATGTGC 3.94451161702  
ATATGTGG 2.17309219499  
ATATGTTA 1.1155652768

ATATGTTTC 0.309128495891  
ATATGTTG 1.9511036755  
ATATTA AAA 2.21257148566  
ATATTA AC 1.81288618799  
ATATTA AG 4.62083819411  
ATATTA AT 4.24476069704  
ATATTACA 2.65601309083  
ATATTACC 1.23850541423  
ATATTACG 4.00177388808  
ATATTAGA 3.21262399941  
ATATTAGC 1.84742374949  
ATATTAGG 0.797620442968  
ATATTATA 3.18923936562  
ATATTATC 2.43140652493  
ATATTATG 0.993625226441  
ATATTCAA 1.32678828781  
ATATTCAC 1.13391887307  
ATATTCAG 3.52404120414  
ATATTCAT 0.488754251347  
ATATTCCA 4.11432198835  
ATATTCCC 6.06233713517  
ATATTCCG 5.20862334056  
ATATTCGA 2.91916672636  
ATATTCGC 3.41312230483  
ATATTCGG 2.01466312263  
ATATTCTA 3.18368850765  
ATATTCTC 4.73431643365  
ATATTCTG 3.22062719412  
ATATTGAA 1.8949172683  
ATATTGAC 0.698489206073  
ATATTGAG 1.37317929598  
ATATTGAT 1.34407309827  
ATATTGCA 3.36570893455  
ATATTGCC 1.46208025001  
ATATTGCG 5.60785834924  
ATATTGGA 2.04962182821  
ATATTGGC 1.40524557655  
ATATTGGG 0.510806754167  
ATATTGTA 2.50212646225  
ATATTGTC 2.85091848633  
ATATTGTG 2.04898188907  
ATATTTAA 2.52208698443  
ATATTTAC 3.02787873079  
ATATTTAG 3.52094518105  
ATATTTCA 3.96155140198  
ATATTTCC 7.38098732894  
ATATTTCG 5.74212107945  
ATATTTGA 3.07337394905  
ATATTTGC 7.03559526781  
ATATTTGG 2.06778244348  
ATATTTTA 4.32580043376  
ATATTTTC 5.99614402827  
ATATTTTG 3.58136301411  
ATCAAAAA 2.4444072405

ATCAAAAC 2.71031736081  
ATCAAAAG 0.528717555846  
ATCAAAAT 3.30380762512  
ATCAAACA 0.843798485049  
ATCAAACC 0.468863676968  
ATCAAACG 1.08495832395  
ATCAAAGA 1.32742094073  
ATCAAAGC 1.23804471634  
ATCAAAGG 0.0928729901143  
ATCAAATA 2.0788189997  
ATCAAATC 4.55570054963  
ATCAAATG 0.710805848764  
ATCAACAA 2.45562095619  
ATCAACAC 1.67377062061  
ATCAACAG 2.12885645357  
ATCAACAT 0.572967453369  
ATCAACCA 0.933317103186  
ATCAACCC 0.887103879025  
ATCAACCG -0.304910185249  
ATCAACGA 2.92826535366  
ATCAACGC 0.550636200218  
ATCAACGG 0.427949831759  
ATCAACTA 0.957070836553  
ATCAACTC 0.674428826524  
ATCAACTG -0.584130373631  
ATCAAGAA 0.833393332677  
ATCAAGAC 2.22444096202  
ATCAAGAG 1.40270413962  
ATCAAGAT 3.53093481015  
ATCAAGCA 1.21564705441  
ATCAAGCC -0.713426393321  
ATCAAGCG 0.523538503773  
ATCAAGGA 2.76062294793  
ATCAAGGC 0.111368563772  
ATCAAGGG -0.238203295068  
ATCAAGTA 0.558711632688  
ATCAAGTC -0.0663534039516  
ATCAAGTG 0.624386584565  
ATCAATAA 2.96489801847  
ATCAATAC 1.17165279946  
ATCAATAG 1.26173537177  
ATCAATCA 1.49137713876  
ATCAATCC 1.65876889819  
ATCAATCG 0.251292069929  
ATCAATGA 1.99645504278  
ATCAATGC 0.374149144341  
ATCAATGG 0.0919093341915  
ATCAATTA 1.84936854829  
ATCAATTC 1.28197089708  
ATCAATTG 1.18078515159  
ATCACAAA 1.99142858517  
ATCACAAAC 2.11110698983  
ATCACAAAG 0.612353480298  
ATCACAAAT 1.9031673621

ATCACACA 3.87215227801  
ATCACACC 2.43484000454  
ATCACACG 0.34138442661  
ATCACAGA 3.43329600128  
ATCACAGC 0.907925841737  
ATCACAGG -0.353730422398  
ATCACATA 2.09864836975  
ATCACATC 1.89747993938  
ATCACATG 1.98156011566  
ATCACCAA 1.46491771604  
ATCACACC 1.72291103551  
ATCACACG 0.0637212014267  
ATCACCAT -0.0221742869456  
ATCACCCA 1.06187804639  
ATCACCCC 0.288812405698  
ATCACCCG -0.436128104156  
ATCACCGA 1.30468020147  
ATCACCGC 1.65883031069  
ATCACCGG 0.157637579634  
ATCACCTA 0.267693789347  
ATCACCTC 0.859869409639  
ATCACCTG -0.365297624319  
ATCACGAA 1.91417456523  
ATCACGAC 2.42423437676  
ATCACGAG 1.52568841079  
ATCACGAT 2.01960464361  
ATCACGCA 1.16030293536  
ATCACGCC 1.17709249037  
ATCACGCG 1.85518795586  
ATCACGGA 2.94204340585  
ATCACGGC 1.36793321059  
ATCACGGG 0.311641620605  
ATCACGTA 1.9198738541  
ATCACGTC 1.0669744518  
ATCACGTG 1.09285701331  
ATCACTAA 1.17846271791  
ATCACTAC 0.70832894702  
ATCACTAG 1.39775907961  
ATCACTCA 1.15073965478  
ATCACTCC 0.529867114715  
ATCACTCG 1.34748326195  
ATCACTGA 0.560501963415  
ATCACTGC 0.768362691683  
ATCACTGG 0.690453951956  
ATCACTTA 1.04741966852  
ATCACTTC 1.17013060198  
ATCACTTG 1.34187015876  
ATCAGAAA 1.99319539179  
ATCAGAAC 1.59360127608  
ATCAGAAG 2.26699629069  
ATCAGAAT 2.79846387781  
ATCAGACA 1.0557201414  
ATCAGACC 1.11447671408  
ATCAGACG -0.202992277759



ATCAGAGA 2.37177810281  
ATCAGAGC 0.0292188220009  
ATCAGAGG -0.31403025488  
ATCAGATA 3.23254163693  
ATCAGATC 4.24816003546  
ATCAGATG 0.701559831448  
ATCAGCAA 0.944293287789  
ATCAGCAC 1.20432924972  
ATCAGCAG 1.55045555462  
ATCAGCAT 1.65563873391  
ATCAGCCA 2.10347997276  
ATCAGCCC 0.975631569922  
ATCAGCCG -0.710971974801  
ATCAGCGA 2.19038845524  
ATCAGCGC 0.343425403639  
ATCAGCGG 0.362844663045  
ATCAGCTA 3.05579477492  
ATCAGCTC 0.835798413013  
ATCAGCTG 1.22928312921  
ATCAGGAA 2.48116731024  
ATCAGGAC 1.99542185541  
ATCAGGAG 0.450449709084  
ATCAGGAT 2.95380962593  
ATCAGGCA 1.98645729474  
ATCAGGCC -0.392520435737  
ATCAGGCG 0.947535035473  
ATCAGGGA 1.18156123914  
ATCAGGGC -0.0153110749209  
ATCAGGGG 0.870912627556  
ATCAGGTA 1.50646733683  
ATCAGGTC 1.1606383101  
ATCAGGTG 0.703568540888  
ATCAGTAA 1.8817891478  
ATCAGTAC 2.55971494822  
ATCAGTAG 0.664796847212  
ATCAGTCA 0.678644430853  
ATCAGTCC -0.272738774794  
ATCAGTCG 0.111016742966  
ATCAGTGA 2.28431794866  
ATCAGTGC 1.60897480439  
ATCAGTGG 0.997429262881  
ATCAGTTA 0.0802842587886  
ATCAGTTC 2.44088695066  
ATCAGTTG -0.33397870274  
ATCATAAA 2.42947046961  
ATCATAAC 1.86149637354  
ATCATAAG 1.78110802576  
ATCATAAT 1.22685161027  
ATCATACA 1.78760984079  
ATCATACC 1.26955557802  
ATCATACG 0.608799881983  
ATCATAGA 3.35446982114  
ATCATAGC 1.65215258526  
ATCATAGG 0.267288050442

ATCATATA 1.15701497216  
ATCATATC 4.47792212933  
ATCATATG 0.735294242263  
ATCATCAA 1.74159625932  
ATCATCAC 1.3071079732  
ATCATCAG 1.46983946011  
ATCATCAT 0.0687024844079  
ATCATCCA 1.4696523081  
ATCATCCC 0.718733683037  
ATCATCCG 0.0512261501972  
ATCATCGA 1.54323781548  
ATCATCGC 1.18883664359  
ATCATCGG 0.291085084831  
ATCATCTA 1.87731248827  
ATCATCTC 2.71856641373  
ATCATCTG 1.78669656394  
ATCATGAA 2.72602459845  
ATCATGAC 2.54162094991  
ATCATGAG 1.48544656414  
ATCATGAT 1.31327420531  
ATCATGCA 0.809177027812  
ATCATGCC 1.09005889292  
ATCATGCG 0.0724297031683  
ATCATGGA 1.88347330775  
ATCATGGC 0.11366664062  
ATCATGGG -0.376721391604  
ATCATGTA 1.10635090254  
ATCATGTC 2.76934144222  
ATCATGTG 0.790294034913  
ATCATTAA 1.34192032966  
ATCATTAC 1.63217832333  
ATCATTAG 0.841837864725  
ATCATTCA 1.5170390316  
ATCATTCC -0.534197216939  
ATCATTCCG 2.87253485626  
ATCATTGA 2.22234627507  
ATCATTGC 1.71212783191  
ATCATTGG 0.882516052447  
ATCATTTA 0.60464485745  
ATCATTTT 0.947648284301  
ATCATTTG 1.34762565569  
ATCCAAAA 2.08628696879  
ATCCAAAC 3.67775233867  
ATCCAAAG 2.07570736326  
ATCCAAAT 2.39024848693  
ATCCAACA 2.52163627908  
ATCCAACC 4.03865678284  
ATCCAACG 1.12073267091  
ATCCAAGA 2.32265142766  
ATCCAAGC 1.85549106302  
ATCCAAGG -0.359862305138  
ATCCAATA 3.40833421102  
ATCCAATC 3.55301083708  
ATCCAATG 0.807397730519

ATCCACAA 3.51251230697  
ATCCACAC 2.41932449883  
ATCCACAG 2.10005294666  
ATCCACAT 1.37409465461  
ATCCACCA 2.15125807088  
ATCCACCC 2.39673489679  
ATCCACCG 0.409527328577  
ATCCACGA 4.4868261102  
ATCCACGC 2.84553417076  
ATCCACGG 2.42238533984  
ATCCACTA 2.33512545291  
ATCCACTC 0.848325731831  
ATCCACTG 2.06878794318  
ATCCAGAA 4.94398331417  
ATCCAGAC 1.16995552429  
ATCCAGAG 1.57488607464  
ATCCAGAT 5.55530256621  
ATCCAGCA 2.8774399461  
ATCCAGCC 1.37269320037  
ATCCAGCG 0.864177653174  
ATCCAGGA 2.29374861985  
ATCCAGGC 0.909829837648  
ATCCAGGG 0.813861448977  
ATCCAGTA 3.51742863842  
ATCCAGTC 0.257290510577  
ATCCAGTG 0.653862922741  
ATCCATAA 2.94370799707  
ATCCATAC 0.874311549623  
ATCCATAG 2.28957048756  
ATCCATCA 2.95217397145  
ATCCATCC 0.728115640581  
ATCCATCG 1.23994600593  
ATCCATGA 2.335105676  
ATCCATGC 1.06165821043  
ATCCATGG 1.39248218388  
ATCCATTA 3.29174329416  
ATCCATTC 3.52462701701  
ATCCATTG 3.59779700111  
ATCCCAAA 2.13548817167  
ATCCCAAC 0.917791813112  
ATCCCAAG 1.57687542352  
ATCCCAAT 1.57488607464  
ATCCCACA 2.71566649431  
ATCCCACC 1.25045941086  
ATCCCACG 0.104126884158  
ATCCCAGA 1.24416993738  
ATCCCAGC 0.529910832094  
ATCCCAGG 0.608218440853  
ATCCCATA 3.25128327697  
ATCCCATC 1.14161562977  
ATCCCATG 0.946232882136  
ATCCCCAA 3.815895923  
ATCCCCAC 1.40926424449  
ATCCCCAG 0.969337308348

ATCCCAT 1.3171250818  
ATCCCCA 0.895809258096  
ATCCCCCC -0.477705204446  
ATCCCCCG 0.220743615096  
ATCCCCGA 2.1216805582  
ATCCCCGC 0.709281985866  
ATCCCCGG 2.83601564845  
ATCCCCTA 2.5230918596  
ATCCCCTC 1.62886100703  
ATCCCCTG 0.45270968936  
ATCCCGAA 1.18078515159  
ATCCCGAC 1.46466915151  
ATCCCGAG 1.14771857577  
ATCCCGAT 2.4264550114  
ATCCCGCA 2.89073585806  
ATCCCGCC 0.447832495374  
ATCCCGCG 0.20256301474  
ATCCCGGA 3.23417250331  
ATCCCGGC -0.799160751928  
ATCCCGGG 0.539141027882  
ATCCCGTA 2.0765138448  
ATCCCGTC 0.447855394953  
ATCCCGTG 0.498280268061  
ATCCCTAA 1.30978264404  
ATCCCTAC 0.548040220664  
ATCCCTAG 1.16799011587  
ATCCCTCA 3.9972314443  
ATCCCTCC 0.718733683037  
ATCCCTCG 1.26293114616  
ATCCCTGA 0.616543686912  
ATCCCTGC 1.27234058319  
ATCCCTGG 0.663602738253  
ATCCCTTA 2.08960782411  
ATCCCTTC 0.204318996099  
ATCCCTTG 2.36829903222  
ATCCGAAA 3.43055367259  
ATCCGAAC 4.31985736845  
ATCCGAAG 1.25644785897  
ATCCGAAT 4.33449144855  
ATCCGACA 1.19330913956  
ATCCGACC 1.13943350806  
ATCCGACG 1.02267063618  
ATCCGAGA 3.61428219991  
ATCCGAGC 1.03246374525  
ATCCGAGG 0.0337525223003  
ATCCGATA 5.44123788927  
ATCCGATC 1.94361426408  
ATCCGATG 1.32738950585  
ATCCGCAA 2.93778366779  
ATCCGCAC 3.51132236157  
ATCCGCAG 1.44784441442  
ATCCGCAT 2.57123135472  
ATCCGCCA 2.40506243281  
ATCCGCC 1.08973892335

ATCCGCCG 0.343245954211  
ATCCGCGA 3.08052174039  
ATCCGCGC 1.99219676196  
ATCCGCGG 0.922264309082  
ATCCGCTA 4.26663833034  
ATCCGCTC 3.00735467078  
ATCCGCTG 2.24838122287  
ATCCGGAA 3.34043945722  
ATCCGGAC 2.29970792304  
ATCCGGAG 0.706358542331  
ATCCGGAT 7.66453220692  
ATCCGGCA 2.63414524189  
ATCCGGCC 1.96108622655  
ATCCGGCG 1.11363130326  
ATCCGGGA 1.57011754956  
ATCCGGGC 0.972208291029  
ATCCGGGG 2.96414816135  
ATCCGGTA 4.61327009141  
ATCCGGTC 0.776454362036  
ATCCGGTG 1.53794842907  
ATCCGTAA 2.89073585806  
ATCCGTAC 2.90484199877  
ATCCGTAG 1.45415158303  
ATCCGTCA 0.969348133603  
ATCCGTCC 0.181446271992  
ATCCGTCCG 0.641887067422  
ATCCGTGA 4.18312398184  
ATCCGTGC 0.524048123496  
ATCCGTGG -0.00229620324655  
ATCCGTTA 3.14714910658  
ATCCGTTC 1.96054538013  
ATCCGTTG 1.675554706  
ATCCTAAA 2.48250714379  
ATCCTAAC 2.95428989256  
ATCCTAAG 1.40724491798  
ATCCTAAT 2.63697729529  
ATCCTACA 2.46744213526  
ATCCTACC 2.6463396841  
ATCCTACG 1.0303444933  
ATCCTAGA 3.0439844211  
ATCCTAGC 2.66572625956  
ATCCTAGG 0.7160136294  
ATCCTATA 4.4355545772  
ATCCTATC 1.7244236568  
ATCCTATG 0.19735356868  
ATCCTCAA 4.73139236558  
ATCCTCAC 1.37269320037  
ATCCTCAG 1.59287306946  
ATCCTCAT 1.07638034981  
ATCCTCCA 2.65680375085  
ATCCTCCC 2.63597679186  
ATCCTCCG 1.57034050819  
ATCCTCGA 1.47878361934  
ATCCTCGC 0.772276646102

ATCCTCGG -0.107262669245  
ATCCTCTA 4.07869107603  
ATCCTCTC 0.450383092126  
ATCCTCTG 3.89648703615  
ATCCTGAA 1.86214359892  
ATCCTGAC 5.45065065716  
ATCCTGAG 2.51455781101  
ATCCTGCA 4.08668053099  
ATCCTGCC 1.73023577814  
ATCCTGCG 2.42199771242  
ATCCTGGA 1.99777509942  
ATCCTGGC 1.14198743566  
ATCCTGGG 1.40604914359  
ATCCTGTA 2.0438709112  
ATCCTGTC 3.98788550155  
ATCCTGTG 1.40546062441  
ATCCTTAA 3.29480226156  
ATCCTTAC 1.70264449168  
ATCCTTAG 0.48927219819  
ATCCTTCA 2.0971780086  
ATCCTTCC 1.43117664353  
ATCCTTCG 1.57090425419  
ATCCTTGA 1.56189493525  
ATCCTTGC 1.21886756793  
ATCCTTGG 0.99631405338  
ATCCTTTA 1.65399121328  
ATCCTTTC 1.33461557211  
ATCCTTTG 2.18944332715  
ATCGAAAA 1.17687681798  
ATCGAAAC 2.52797821342  
ATCGAAAG 0.330726546156  
ATCGAAAT 5.09633025833  
ATCGAACA 1.14019710494  
ATCGAACC 0.114295338154  
ATCGAACG 0.877506249081  
ATCGAAGA 2.52768634787  
ATCGAAGC 0.0996443956447  
ATCGAAGG -0.129749639533  
ATCGAATA 1.54217923039  
ATCGAATC 4.85313818588  
ATCGAATG 0.279284515382  
ATCGACAA 0.731545164814  
ATCGACAC 0.254648315508  
ATCGACAG 1.24933316793  
ATCGACAT 0.574405546935  
ATCGACCA 0.537286578334  
ATCGACCC -0.431409333623  
ATCGACCG -0.120034389025  
ATCGACGA 0.094944152952  
ATCGACGC 1.076083488  
ATCGACGG 0.194924131519  
ATCGACTA 1.27142314279  
ATCGACTC 0.0925242919784  
ATCGACTG 0.41249865305

ATCGAGAA 2.2961233062  
ATCGAGAC 0.565543201658  
ATCGAGAG 1.63510697131  
ATCGAGAT 4.13601704956  
ATCGAGCA 0.113040233043  
ATCGAGCC 0.102633831603  
ATCGAGCG -0.0422505560925  
ATCGAGGA 1.8013110753  
ATCGAGGC 0.400427035855  
ATCGAGGG 0.464466541431  
ATCGAGTA 0.569070777724  
ATCGAGTC -0.245393138361  
ATCGAGTG -0.532479332153  
ATCGATAA 1.70202911754  
ATCGATAC 2.27032380771  
ATCGATAG 1.33668132232  
ATCGATCA 1.61436994522  
ATCGATCC 1.37473730006  
ATCGATCG 0.921429723514  
ATCGATGA 0.729207950503  
ATCGATGC 0.507643697764  
ATCGATGG 1.31799942936  
ATCGATTA 3.75006879302  
ATCGATTC 5.20734825037  
ATCGATTG 2.41548132493  
ATCGCAAA 1.63788156759  
ATCGCAAC 1.7662362064  
ATCGCAAG 1.53204012949  
ATCGCAAT 4.49234324333  
ATCGCACA 1.83316438978  
ATCGCACC 4.00469337623  
ATCGCACG 2.59554862591  
ATCGCAGA 1.73094337514  
ATCGCAGC 0.356041406282  
ATCGCAGG -0.00146807119625  
ATCGCATA 4.88414130144  
ATCGCATC 0.970161485016  
ATCGCATG 1.72544414531  
ATCGCCAA 2.46154445276  
ATCGCCAC 2.35664606097  
ATCGCCAG 2.07287947343  
ATCGCCAT 1.36718023079  
ATCGCCCA 0.898282828992  
ATCGCCCC 1.26964592727  
ATCGCCCG 0.791109259927  
ATCGCCGA 1.1850794472  
ATCGCCGC 1.03365722968  
ATCGCCGG 0.617112012829  
ATCGCCTA 3.54840302542  
ATCGCCTC 1.21645187052  
ATCGCCTG 1.1077588103  
ATCGCGAA 2.34336014155  
ATCGCGAC 4.04240315397  
ATCGCGAG 3.60208130418

ATCGCGAT 8.12889944744  
ATCGCGCA 3.23017964943  
ATCGCGCC 2.10947529073  
ATCGCGCG 4.8770266104  
ATCGCGGA 3.16063029696  
ATCGCGGC 1.29150586545  
ATCGCGGG 1.45316773384  
ATCGCGTA 3.4720397991  
ATCGCGTC 2.95386208679  
ATCGCGTG 3.11188417117  
ATCGCTAA 1.8359754172  
ATCGCTAC 1.67076723673  
ATCGCTAG 0.674488781786  
ATCGCTCA 1.71972299775  
ATCGCTCC 0.251228159286  
ATCGCTCG 2.08149887499  
ATCGCTGA 0.886853232723  
ATCGCTGC 0.904246087559  
ATCGCTGG 0.790439551329  
ATCGCTTA 2.94049039804  
ATCGCTTC 1.53004078806  
ATCGCTTG 1.1646376175  
ATCGGAAA 3.46036621823  
ATCGGAAC 1.24344714339  
ATCGGAAG 1.0352887206  
ATCGGAAT 3.54555681592  
ATCGGACA 0.0411091161649  
ATCGGACC 0.310183541952  
ATCGGACG -0.3704406616  
ATCGGAGA 1.40751138581  
ATCGGAGC 0.169228722025  
ATCGGAGG -0.638625126473  
ATCGGATA 2.76351787108  
ATCGGATC 1.99487247369  
ATCGGATG 1.24612389601  
ATCGGCAA 2.04071701462  
ATCGGCAC 0.546101875385  
ATCGGCAG 0.808015810975  
ATCGGCAT 0.339213962871  
ATCGGCCA 0.249826705047  
ATCGGCCC 0.5792952316  
ATCGGCCG -0.18178018949  
ATCGGCGA 2.55412953271  
ATCGGCGC 0.813789211214  
ATCGGCGG -0.151802975066  
ATCGGCTA 0.509014758016  
ATCGGCTC 0.327521854155  
ATCGGCTG 0.730710579246  
ATCGGGAA 1.84530762021  
ATCGGGAC -0.0631878494124  
ATCGGGAG 0.699184520565  
ATCGGGCA 0.967034859762  
ATCGGGCC -0.893483077219  
ATCGGGCG 0.557417390114



ATCGGGGA 1.69273813378  
ATCGGGGC 1.41485090907  
ATCGGGGG 0.08870256041  
ATCGGGTA 2.44932065745  
ATCGGGTC 0.358659660881  
ATCGGGTG -0.617331432432  
ATCGGTAA 1.40576144161  
ATCGGTAC 0.732445534627  
ATCGGTAG 0.573721682233  
ATCGGTCA -0.590708381807  
ATCGGTCC 0.207550959417  
ATCGGTCCG -0.0301121137625  
ATCGGTGA 2.48666841367  
ATCGGTGC -0.268394308289  
ATCGGTGG 1.47601568477  
ATCGGTTA 2.70906933375  
ATCGGTTC 0.747485978159  
ATCGGTTG 0.682794459114  
ATCGTAAA 3.1899613269  
ATCGTAAC 1.94313774466  
ATCGTAAG 2.26898480687  
ATCGTAAT 4.10693791499  
ATCGTACA 1.24387307556  
ATCGTACC 0.554451686447  
ATCGTACG 1.3856668528  
ATCGTAGA 1.49487452902  
ATCGTAGC 1.25737300196  
ATCGTAGG 0.613749938266  
ATCGTATA 3.41312230483  
ATCGTATC 4.60948791366  
ATCGTATG 1.36983679014  
ATCGTCAA 2.18909462902  
ATCGTCAC 0.466688841491  
ATCGTCAG 1.37900182622  
ATCGTCAT 1.61088088208  
ATCGTCCA 1.63419931527  
ATCGTCCC 1.36100275707  
ATCGTCCG 1.7277153672  
ATCGTCGA 1.50459644122  
ATCGTCGC 1.2651488663  
ATCGTCGG 0.87266902527  
ATCGTCTA 2.26187885931  
ATCGTCTC 2.51796006393  
ATCGTCTG 0.620610860332  
ATCGTGAA 1.83826350151  
ATCGTGAC 1.06528633647  
ATCGTGAG 2.2264019987  
ATCGTGCA 1.80021147915  
ATCGTGCC 1.53491631662  
ATCGTGCG 2.23028139557  
ATCGTGGA 3.35488534441  
ATCGTGGC 0.284742734142  
ATCGTGGG 1.07332013334  
ATCGTGTA 3.68087313495

ATCGTGTC 3.2136844581  
ATCGTGTG 0.138189383488  
ATCGTTAA 1.99634616569  
ATCGTTAC 0.97877547395  
ATCGTTAG 0.223908336923  
ATCGTTCA 1.72610219595  
ATCGTTCC -0.433153865192  
ATCGTTCCG 1.57479405997  
ATCGTTGA 0.855509537962  
ATCGTTGC 1.61874834474  
ATCGTTGG 0.933311898736  
ATCGTTTA 1.09419851228  
ATCGTTTC 1.68470371237  
ATCGTTTG 0.224123384789  
ATCTAAAA 2.68619598511  
ATCTAAAC 2.10199483097  
ATCTAAAG 1.94666448801  
ATCTAAAT 3.22922723512  
ATCTAACA 1.24262900389  
ATCTAACC 1.77957937476  
ATCTAACG 1.16612817192  
ATCTAAGA 2.67300416215  
ATCTAAGC 1.07673695871  
ATCTAAGG -0.235637501322  
ATCTAATA 3.60575106581  
ATCTAATC 1.9773959313  
ATCTAATG 3.02299924684  
ATCTACAA 4.43689107991  
ATCTACAC 2.93647464458  
ATCTACAG 1.65227665934  
ATCTACAT 2.01212106117  
ATCTACCA 3.17119533003  
ATCTACCC 0.309074369613  
ATCTACCG 1.52708486876  
ATCTACGA 4.19145693048  
ATCTACGC 1.89083926962  
ATCTACGG 0.582767432321  
ATCTACTA 4.37988049604  
ATCTACTC 1.29589509022  
ATCTACTG 1.30967980411  
ATCTAGAA 3.32076205711  
ATCTAGAC 2.22935271355  
ATCTAGAG 3.78567430762  
ATCTAGAT 4.74064837544  
ATCTAGCA 3.97192178863  
ATCTAGCC 1.62767793151  
ATCTAGCG 1.11075594884  
ATCTAGGA 4.00469920522  
ATCTAGGC -0.564101985422  
ATCTAGGG 2.28177193182  
ATCTAGTA 1.92110959866  
ATCTAGTC 2.22890658812  
ATCTAGTG 0.95691158039  
ATCTATAA 2.05812756459

ATCTATAC 3.41819060621  
ATCTATAG 3.06270545152  
ATCTATCA 3.13861797249  
ATCTATCC 1.20008429229  
ATCTATCG 1.68589615591  
ATCTATGA 3.58212244742  
ATCTATGC 1.37761327902  
ATCTATGG 1.49203123401  
ATCTATTA 6.07290549909  
ATCTATTC 5.57534386145  
ATCTATTG 2.21232167207  
ATCTCAA 4.49990926426  
ATCTCAAC 4.30909248451  
ATCTCAAG 1.10683429184  
ATCTCAAT 1.46208025001  
ATCTCACA 4.86284864829  
ATCTCACC 2.61029012584  
ATCTCACG 1.46109057184  
ATCTCAGA 2.53955957144  
ATCTCAGC 1.5262444542  
ATCTCAGG 1.20497522603  
ATCTCATA 3.02812250721  
ATCTCATC 2.89741420803  
ATCTCATG 2.42137068031  
ATCTCCAA 2.99203651781  
ATCTCCAC 6.97615025051  
ATCTCCAG 3.74657202729  
ATCTCCAT 2.96369870507  
ATCTCCCA 3.7262871638  
ATCTCCCC 2.52967486405  
ATCTCCCG 1.92651285843  
ATCTCCGA 3.61517174446  
ATCTCCGC 3.85715471915  
ATCTCCGG 1.95474179408  
ATCTCCTA 4.02888865512  
ATCTCCTC 3.29694149861  
ATCTCCTG 3.18724397957  
ATCTCGAA 5.99857263272  
ATCTCGAC 6.44932003633  
ATCTCGAG 2.95930760669  
ATCTCGCA 2.63941172872  
ATCTCGCC 3.45997567631  
ATCTCGCG 3.12597449035  
ATCTCGGA 4.78014182221  
ATCTCGGC 2.01262630916  
ATCTCGGG 1.02549228067  
ATCTCGTA 6.03893792892  
ATCTCGTC 2.96332752371  
ATCTCGTG 7.31825538933  
ATCTCTAA 2.53619499874  
ATCTCTAC 2.26060231186  
ATCTCTAG 3.14485394422  
ATCTCTCA 3.59645904116  
ATCTCTCC 1.46657939277

ATCTCTCG 2.19180031837  
ATCTCTGA 4.20691789356  
ATCTCTGC 2.92121020153  
ATCTCTGG 2.50283697374  
ATCTCTTA 5.12573123608  
ATCTCTTC 3.70403023019  
ATCTCTTG 4.61175164114  
ATCTGAAA 2.5825491594  
ATCTGAAC 3.3709979046  
ATCTGAAG 0.908497082146  
ATCTGAAT 5.20020170809  
ATCTGACA 2.73879486099  
ATCTGACC 0.513895491027  
ATCTGACG 1.48571636281  
ATCTGAGA 3.6841009347  
ATCTGAGC 1.57780389737  
ATCTGAGG 3.38173031277  
ATCTGATA 4.00976979656  
ATCTGATC 3.1230483405  
ATCTGATG 1.33268763573  
ATCTGCAA 3.96021698106  
ATCTGCAC 4.18856263187  
ATCTGCAG 2.16290104959  
ATCTGCAT 2.66978531404  
ATCTGCCA 2.28247432436  
ATCTGCCC 1.56503425937  
ATCTGCCG 0.936891727478  
ATCTGCGA 3.85581904915  
ATCTGCGC 2.44010378506  
ATCTGCGG 1.53320238722  
ATCTGCTA 5.04030831174  
ATCTGCTC 1.33935037235  
ATCTGCTG 2.61398112163  
ATCTGGAA 3.15911559389  
ATCTGGAC 6.25027980957  
ATCTGGAG 2.86339126252  
ATCTGGCA 2.08611418106  
ATCTGGCC 1.71087709853  
ATCTGGCG 1.46331911724  
ATCTGGGA 5.04709345702  
ATCTGGGC 0.903541821414  
ATCTGGGG 1.93599411688  
ATCTGGTA 3.10765815794  
ATCTGGTC 1.93101783017  
ATCTGGTG 3.06473435423  
ATCTGTAA 3.23644143524  
ATCTGTAC 2.26425646015  
ATCTGTAG 1.97414439925  
ATCTGTCA 1.46340571928  
ATCTGTCC 0.305827417479  
ATCTGTCT 1.16205454498  
ATCTGTGA 6.08652616872  
ATCTGTGC 1.23891510852  
ATCTGTGG 1.08646927981

ATCTGTTA 3.9712079463  
ATCTGTTC 2.42508311843  
ATCTGTTG 3.83406611446  
ATCTTAAA 1.97429262198  
ATCTTAAC 4.43360957023  
ATCTTAAG 1.8990735419  
ATCTTAAT 3.98187082302  
ATCTTACA 2.37630680684  
ATCTTACC 1.82290517018  
ATCTTACG 2.98256899911  
ATCTTAGA 4.90883079488  
ATCTTAGC 1.06436993695  
ATCTTAGG 0.15254263147  
ATCTTATA 4.60234657584  
ATCTTATC 4.26153297328  
ATCTTATG 2.20349950514  
ATCTTCAA 3.48433749759  
ATCTTCAC 4.27557332974  
ATCTTCAG 3.62033310141  
ATCTTCAT 3.48642302471  
ATCTTCCA 4.01415506595  
ATCTTCCC 3.34195957292  
ATCTTCCG 3.55391974219  
ATCTTCGA 5.23663785288  
ATCTTCGC 1.69131544538  
ATCTTCGG 3.78775858567  
ATCTTCTA 2.40172263329  
ATCTTCTC 3.17841244464  
ATCTTCTG 3.79208244255  
ATCTTGAA 2.37326345278  
ATCTTGAC 2.72563030934  
ATCTTGAG 2.89099649691  
ATCTTGCA 3.5987979209  
ATCTTGCC 2.35571154996  
ATCTTGCG 2.77635370968  
ATCTTGGA 2.45761030508  
ATCTTGGC 0.816499688664  
ATCTTGGG 0.726873442506  
ATCTTGTA 3.40531521379  
ATCTTGTC 3.75397962476  
ATCTTGTG 4.05724249757  
ATCTTTAA 3.9832264781  
ATCTTTAC 1.76688051728  
ATCTTTAG 1.94349747623  
ATCTTTCA 1.3208793637  
ATCTTTCC 0.6185018091  
ATCTTTCCG 1.77979254903  
ATCTTTGA 2.18944332715  
ATCTTTGC 0.839926790763  
ATCTTTGG 3.03292329988  
ATCTTTTA 3.08126639307  
ATCTTTTC 2.65186535253  
ATCTTTTG 3.62853864512  
ATGAAAAA 0.827192334843

ATGAAAAC 1.67596398393  
ATGAAAAG 1.489469812  
ATGAAAAT 3.7794485366  
ATGAAACA 1.74584558848  
ATGAAACC -0.081280806834  
ATGAAACG 1.11662011468  
ATGAAAGA 0.5781052862  
ATGAAAGC 1.95631437063  
ATGAAAGG -0.349975932321  
ATGAAATA 1.52202697627  
ATGAAATC 12.3600111626  
ATGAAATG 0.09671366588  
ATGAACAA 0.645862434349  
ATGAACAC 0.278240294576  
ATGAACAG -0.138442736104  
ATGAACAT 0.0557833746097  
ATGAACCA 0.0467116022729  
ATGAACCC -0.866312102121  
ATGAACCG -1.20896828808  
ATGAACGA 0.41009190729  
ATGAACGC -0.841654043558  
ATGAACGG 0.132338332858  
ATGAACTA -0.558461194564  
ATGAACTC -0.325291018797  
ATGAACTG -1.17530195147  
ATGAAGAA 1.58365744613  
ATGAAGAC 0.135833016802  
ATGAAGAG 0.165201310601  
ATGAAGCA -0.761874408221  
ATGAAGCC -1.3495221572  
ATGAAGCG -0.0992511474187  
ATGAAGGA 1.40573895839  
ATGAAGGC -0.409878524849  
ATGAAGGG -0.452494433316  
ATGAAGTA -0.292728858253  
ATGAAGTC -0.424068144929  
ATGAAGTG 0.736531444067  
ATGAATAA 2.18029327989  
ATGAATAC 0.241019735115  
ATGAATAG 0.217635517683  
ATGAATCA 2.4142888814  
ATGAATCC 2.54212182616  
ATGAATCG 1.17212952706  
ATGAATGA 1.00173334286  
ATGAATGC -0.0251816262112  
ATGAATGG 0.0288197447911  
ATGAATTA 0.423462971508  
ATGAATTC 1.22190779932  
ATGAATTG 2.76397586266  
ATGACAAA 0.536514654341  
ATGACAAC -0.0615655183244  
ATGACAAG 0.207004908545  
ATGACAAT 1.65646228604  
ATGACACA 1.09355461776

ATGACACC -0.671716267295  
ATGACACG 0.224450432413  
ATGACAGA -0.20034279646  
ATGACAGC 0.515094388081  
ATGACAGG -0.638329305547  
ATGACATA -0.203495027608  
ATGACATC 0.337856850544  
ATGACATG 0.453606936503  
ATGACCAA 0.670156181426  
ATGACCAC 0.230692857667  
ATGACCAG -0.600847899063  
ATGACCAT -0.543526089096  
ATGACCCA 0.566319081032  
ATGACCCC -0.800700852709  
ATGACCCG -0.307137897936  
ATGACCGA -1.07150565396  
ATGACCGC -0.901263313296  
ATGACCGG 1.04219294369  
ATGACCTA -0.716513672935  
ATGACCTC -1.0016440345  
ATGACCTG -0.986210759095  
ATGACGAA 0.275036018931  
ATGACGAC -0.151466975788  
ATGACGAG 0.372878009525  
ATGACGCA 0.237850225194  
ATGACGCC -0.95616318051  
ATGACGCG -0.305554079777  
ATGACGGA 1.20207509843  
ATGACGGC -0.101811944892  
ATGACGGG -0.72819141737  
ATGACGTA 0.443529456289  
ATGACGTC -0.67020239694  
ATGACGTG 0.895677897784  
ATGACTAA 0.53579435849  
ATGACTAC 0.276024656212  
ATGACTAG 0.142593597077  
ATGACTCA 0.060592494392  
ATGACTCC -0.505154721697  
ATGACTCG 0.0233758903126  
ATGACTGA -0.373959286013  
ATGACTGC -0.628180212104  
ATGACTGG -0.85764710958  
ATGACTTA -0.171432702421  
ATGACTTC -0.479370212023  
ATGACTTG 1.01489851904  
ATGAGAAA 1.27472276395  
ATGAGAAC 0.252631487126  
ATGAGAAG 1.13948222171  
ATGAGAAT 2.84511365122  
ATGAGACA 0.946047811902  
ATGAGACC -1.25119823455  
ATGAGACG -0.0357524882649  
ATGAGAGA 1.07014500261  
ATGAGAGC -0.827826028649

ATGAGAGG -0.778532394747  
ATGAGATA 1.36137726928  
ATGAGATC 6.17326727609  
ATGAGATG 0.06639087599  
ATGAGCAA -0.127648915421  
ATGAGCAC 0.115352674173  
ATGAGCAG 0.659141483894  
ATGAGCAT -0.0594454336587  
ATGAGCCA 0.488928912682  
ATGAGCCC -1.51147006215  
ATGAGCCG -0.649214932724  
ATGAGCGA 0.431532366816  
ATGAGCGC -0.0223081453941  
ATGAGCGG -0.860881154678  
ATGAGCTA -0.779721091079  
ATGAGCTC -1.05794806226  
ATGAGCTG -0.459264381601  
ATGAGGAA 0.119234777359  
ATGAGGAC -0.382013900683  
ATGAGGAG -0.116835317829  
ATGAGGCA -0.481621032467  
ATGAGGCC -1.08073126983  
ATGAGGCG -0.232620377691  
ATGAGGGA 1.29854269792  
ATGAGGGC -0.871314411079  
ATGAGGGG -0.631110317335  
ATGAGGTA 0.093886608755  
ATGAGGTC -0.503793237633  
ATGAGGTG 1.03370198795  
ATGAGTAA 1.76865523466  
ATGAGTAC 0.319664384042  
ATGAGTAG 0.465268651233  
ATGAGTCA 0.616701694007  
ATGAGTCC -1.33873853724  
ATGAGTCG 0.38158193135  
ATGAGTGA -0.501213079606  
ATGAGTGC 0.182626016669  
ATGAGTGG -0.424917511135  
ATGAGTTA -0.221460996455  
ATGAGTTC 0.256220267522  
ATGAGTTG -0.00379716656546  
ATGATAAA 1.72098122553  
ATGATAAC 0.536259011767  
ATGATAAG 0.545818545138  
ATGATAAT 0.794326442609  
ATGATACA 1.15707721738  
ATGATACC 1.04436340743  
ATGATACG 1.78696532173  
ATGATAGA 2.13287761965  
ATGATAGC 0.0445138672164  
ATGATAGG -0.0394245398575  
ATGATATA 0.83408427543  
ATGATATC 9.04408008401  
ATGATATG 2.33078327637



ATGATCAA 0.79080532006  
ATGATCAC 0.324553860529  
ATGATCAG 1.05683077098  
ATGATCAT 1.50501696076  
ATGATCCA 1.60100533452  
ATGATCCC 0.879114840422  
ATGATCCG 1.88918446277  
ATGATCGA 1.05929289209  
ATGATCGC 1.15701497216  
ATGATCGG -0.22781833596  
ATGATCTA 0.0558683112303  
ATGATCTC 2.45521084555  
ATGATCTG 0.174025559306  
ATGATGAA 0.214823865729  
ATGATGAC -0.341606344349  
ATGATGAG 1.3524762029  
ATGATGCA 0.447670116541  
ATGATGCC -0.367136668696  
ATGATGCG 0.177390964717  
ATGATGGA 1.24668431116  
ATGATGGC -0.128376289323  
ATGATGGG -0.0362725168878  
ATGATGTA 0.735333171547  
ATGATGTC 0.520988323377  
ATGATGTG 0.722155712862  
ATGATTAA 2.48116044037  
ATGATTAC 4.31642451337  
ATGATTAG 1.52810473274  
ATGATTCA 0.943566330243  
ATGATTCC 2.89552645  
ATGATTCCG 2.26948505858  
ATGATTGA -0.0503996835708  
ATGATTGC 3.79857884496  
ATGATTGG 0.045530816705  
ATGATTTA 1.99799368631  
ATGATTTT 6.72147362279  
ATGATTTG 3.61850862949  
ATGCAAAA 0.936928783161  
ATGCAAAC 0.447645135182  
ATGCAAAG -0.0292798181524  
ATGCAAAT 3.07951873883  
ATGCAACA 0.716860081113  
ATGCAACC -0.58449426876  
ATGCAACG 1.30812471451  
ATGCAAGA 1.01106096594  
ATGCAAGC -0.742311506001  
ATGCAAGG 0.863525639704  
ATGCAATA 0.741873707685  
ATGCAATC 11.9067756157  
ATGCAATG -0.413840152028  
ATGCACAA -0.23869230517  
ATGCACAC 0.832945541817  
ATGCACAG 0.283099585254  
ATGCACAT 0.763815459814

ATGCACCA 0.324924417354  
ATGCACCC -0.199990351121  
ATGCACCG 0.240593802944  
ATGCACGA 0.16299462389  
ATGCACGC -0.792023369488  
ATGCACGG -0.318352862696  
ATGCACTA 0.336394816509  
ATGCACTC -0.125855253846  
ATGCACTG 0.897356228751  
ATGCAGAA 1.62900693981  
ATGCAGAC 0.108241313983  
ATGCAGAG 0.251820009315  
ATGCAGCA -0.730024840941  
ATGCAGCC -0.998855073945  
ATGCAGCG -0.201756533201  
ATGCAGGA 1.35263108732  
ATGCAGGC -0.279093824341  
ATGCAGGG 0.191696123582  
ATGCAGTA 0.426324378001  
ATGCAGTC -0.673352962664  
ATGCAGTG 1.8775581383  
ATGCATAA 1.68100459764  
ATGCATAC 1.07028656364  
ATGCATAG 0.938788228981  
ATGCATCA 0.837667435021  
ATGCATCC -0.035948591933  
ATGCATCG -0.05621971568  
ATGCATGA -0.741969261383  
ATGCATGC -0.363935099365  
ATGCATGG -0.898401906803  
ATGCATTA 0.414472388588  
ATGCATTC 0.698292894227  
ATGCATTG 0.484676044493  
ATGCCAAA 0.771735383324  
ATGCCAAC 0.0584819859139  
ATGCCAAG -0.718706619898  
ATGCCAAT 0.873255879028  
ATGCCACA 0.625614002003  
ATGCCACC -0.725791541484  
ATGCCACG -0.226276153399  
ATGCCAGA 0.148066804652  
ATGCCAGC -0.612953032914  
ATGCCAGG -0.919128523995  
ATGCCATA -0.768163881701  
ATGCCATC -0.739618307325  
ATGCCATG -1.24641367977  
ATGCCCAA 0.643585175299  
ATGCCCAC 0.976201144907  
ATGCCCAG -0.645986092076  
ATGCCCAT 1.20273627173  
ATGCCCCA 0.557561032928  
ATGCCCCC 0.157833475124  
ATGCCCCG 0.0304089755784  
ATGCCCGA -0.386730173081

ATGCCCGC -0.520738093431  
ATGCCCGG -1.29041584549  
ATGCCCTA -0.340159090952  
ATGCCCTC -0.983412846889  
ATGCCCTG -0.439732289724  
ATGCCGAA 2.25776151499  
ATGCCGAC -0.491817174136  
ATGCCGAG 0.131434007663  
ATGCCGCA 0.504921562347  
ATGCCGCC -0.288607558554  
ATGCCGCG 0.149868793347  
ATGCCGGA 0.884895943247  
ATGCCGGC 0.142497210667  
ATGCCGGG 0.0453977909684  
ATGCCGTA 1.07813237579  
ATGCCGTC 0.895694135667  
ATGCCGTG 0.230692857667  
ATGCCTAA 1.2364048983  
ATGCCTAC 1.06859699106  
ATGCCTAG -0.63515729749  
ATGCCTCA 0.056539477075  
ATGCCTCC -0.995859809003  
ATGCCTCG 0.377446683727  
ATGCCTGA -0.0645655713603  
ATGCCTGC -1.35916496176  
ATGCCTGG -1.18931836746  
ATGCCTTA -0.0528197527223  
ATGCCTTC -0.882596825508  
ATGCCTTG 0.874768292137  
ATGCGAAA 1.91500686084  
ATGCGAAC 0.332707151567  
ATGCGAAG 0.462098516778  
ATGCGAAT 3.05245643264  
ATGCGACA 0.413522056056  
ATGCGACC -0.937515845097  
ATGCGACG -0.622809011745  
ATGCGAGA -0.519411166913  
ATGCGAGC 0.29003940678  
ATGCGAGG -0.349453405562  
ATGCGATA 0.813861032622  
ATGCGATC 4.72372267202  
ATGCGATG 0.730535293377  
ATGCGCAA 2.38843525663  
ATGCGCAC 0.554046155719  
ATGCGCAG -0.111822808149  
ATGCGCAT 1.30076562251  
ATGCGCCA 0.358377163347  
ATGCGCCC -0.275675333543  
ATGCGCCG 0.721091923325  
ATGCGCGA 1.02953509727  
ATGCGCGC 0.627025032429  
ATGCGCGG -0.376220099001  
ATGCGCTA -0.231830758569  
ATGCGCTC -0.42129958582

ATGCGCTG 0.140556783608  
ATGCGGAA 0.825685126184  
ATGCGGAC -0.206634976254  
ATGCGGAG -0.638520204766  
ATGCGGCA -0.273263591511  
ATGCGGCC -1.27266159366  
ATGCGGCG -0.962658750202  
ATGCGGGA -0.547773752835  
ATGCGGGC -0.667751725624  
ATGCGGGG -0.867936098633  
ATGCGGTA -0.199990351121  
ATGCGGTC -0.648942219555  
ATGCGGTG 0.485037233308  
ATGCGTAA 2.68169559329  
ATGCGTAC 0.698991331388  
ATGCGTAG -0.0766881921629  
ATGCGTCA 0.676868672585  
ATGCGTCC -0.281464971665  
ATGCGTCG 0.661453508668  
ATGCGTGA -0.174300562432  
ATGCGTGC -0.692770556646  
ATGCGTGG -0.440413448112  
ATGCGTTA 0.0479479713646  
ATGCGTTC -0.794211736535  
ATGCGTTG 0.690206636502  
ATGCTAAA 0.778563621446  
ATGCTAAC 0.863492331226  
ATGCTAAG 0.188031774575  
ATGCTAAT 1.24668431116  
ATGCTACA 0.493950165837  
ATGCTACC -0.666680441679  
ATGCTACG 0.189875815224  
ATGCTAGA 0.0205729818347  
ATGCTAGC 0.0603149931293  
ATGCTAGG 0.241190441068  
ATGCTATA 0.083025130225  
ATGCTATC 0.343519708269  
ATGCTATG -0.332466081453  
ATGCTCAA 0.00430303908488  
ATGCTCAC 0.278979742802  
ATGCTCAG -0.322810161672  
ATGCTCCA 0.597857422214  
ATGCTCCC -0.767391957709  
ATGCTCCG -0.0702871352795  
ATGCTCGA -0.989812654705  
ATGCTCGC -0.348887994137  
ATGCTCGG -0.62881702858  
ATGCTCTA -0.00275794203176  
ATGCTCTC -0.133977526363  
ATGCTCTG -1.15567597132  
ATGCTGAA 0.297977025419  
ATGCTGAC -0.0378788182704  
ATGCTGAG -0.374568414816  
ATGCTGCA 0.150021595992

ATGCTGCC -0.787820880373  
ATGCTGCG 0.427356524483  
ATGCTGGA 0.629310826776  
ATGCTGGC -0.892805041501  
ATGCTGGG -0.783460175985  
ATGCTGTA 0.888113334106  
ATGCTGTC 0.892667644026  
ATGCTGTG 1.86896038725  
ATGCTTAA 2.3092580884  
ATGCTTAC 1.2674729654  
ATGCTTAG -0.0815672597504  
ATGCTTCA -0.646684945593  
ATGCTTCC -0.177465076082  
ATGCTTCG 0.198022236389  
ATGCTTGA -0.523661536966  
ATGCTTGC 0.084648710381  
ATGCTTGG 0.223563802347  
ATGCTTTA -0.472322762475  
ATGCTTTC -0.268394308289  
ATGCTTTG -0.175549838559  
ATGGAAAA 0.350176615905  
ATGGAAAC 0.151344983485  
ATGGAAAG 0.221447256708  
ATGGAAAT 2.92058233671  
ATGGAAACA 0.240228242391  
ATGGAAACC -0.563035281394  
ATGGAACG 0.00673372531395  
ATGGAAGA -0.975033266374  
ATGGAAGC -0.959222147918  
ATGGAAGG -0.866239448002  
ATGGAATA 0.877183156838  
ATGGAATC 4.48355979752  
ATGGAATG -0.539158514833  
ATGGACAA 0.43972125629  
ATGGACAC 0.0395692235616  
ATGGACAG -0.30208250359  
ATGGACAT 0.258759414485  
ATGGACCA -0.104497857339  
ATGGACCC -1.02227280803  
ATGGACCG -0.59668142474  
ATGGACGA 0.00509078460482  
ATGGACGC -0.604294910246  
ATGGACGG -0.321364365521  
ATGGACTA 0.398602772116  
ATGGACTC -0.681604097358  
ATGGACTG -0.444584085994  
ATGGAGAA 0.655364302416  
ATGGAGAC -0.910869062181  
ATGGAGAG -0.352839628772  
ATGGAGCA -0.273803605221  
ATGGAGCC -0.865795404346  
ATGGAGCG -0.906146128088  
ATGGAGGA 0.0490384076842  
ATGGAGGC -0.452406374026

ATGGAGGG -0.82170434663  
ATGGAGTA 0.0677465310709  
ATGGAGTC -0.383409525938  
ATGGAGTG -0.384043427922  
ATGGATAA 2.28962607108  
ATGGATAC 4.03510651537  
ATGGATAG 1.78305865354  
ATGGATCA 0.706398512505  
ATGGATCC 3.62118933749  
ATGGATCG 0.17106901547  
ATGGATGA -0.152982511566  
ATGGATGC -0.3435165856  
ATGGATGG -0.520738093431  
ATGGATTA 3.93021728341  
ATGGATTC 8.65800109168  
ATGGATTG 1.39870691401  
ATGGCAAA 0.179038901697  
ATGGCAAC -0.391927544817  
ATGGCAAG -0.0103372863473  
ATGGCAAT 2.60333906271  
ATGGCACA 0.623304475365  
ATGGCACC -0.859178258707  
ATGGCACG -0.706369159408  
ATGGCAGA 1.37790181371  
ATGGCAGC -0.83896313484  
ATGGCAGG -0.438969733741  
ATGGCATA 0.22399993524  
ATGGCATC -0.136020585172  
ATGGCATG -0.720854600415  
ATGGCCAA 0.115352674173  
ATGGCCAC 0.914929365728  
ATGGCCAG -0.714255358083  
ATGGCCAT -0.879032818293  
ATGGCCCA -0.298196028666  
ATGGCCCC -1.21655013053  
ATGGCCCG -1.18986629193  
ATGGCCGA -0.551219098595  
ATGGCCGC -0.922836174024  
ATGGCCGG -0.524519438469  
ATGGCCTA -0.487862833187  
ATGGCCTC -0.669579112033  
ATGGCCTG -0.766455573103  
ATGGCGAA 0.278813616765  
ATGGCGAC -0.259994326331  
ATGGCGAG 0.0713467612563  
ATGGCGCA 0.386590069293  
ATGGCGCC -0.722209006428  
ATGGCGCG -0.681436722253  
ATGGCGGA -0.538694694268  
ATGGCGGC -0.877034934108  
ATGGCGGG -0.834950295875  
ATGGCGTA -0.126904054567  
ATGGCGTC -0.81409648193  
ATGGCGTG -0.149687886672

ATGGCTAA 0.983748013455  
ATGGCTAC -0.808363051865  
ATGGCTAG 0.31406023251  
ATGGCTCA 0.334100903221  
ATGGCTCC -0.477803048102  
ATGGCTCG -0.162513524552  
ATGGCTGA -0.68149605298  
ATGGCTGC -0.169346967124  
ATGGCTGG -1.06308069064  
ATGGCTTA 0.0149192839408  
ATGGCTTC -0.518603852662  
ATGGCTTG -0.498667062769  
ATGGGAAA 1.65227665934  
ATGGGAAC -0.609120892446  
ATGGGAAG 0.322474162394  
ATGGGAAT 1.92316577268  
ATGGGACA -0.426674325205  
ATGGGACC -0.735556546532  
ATGGGACG -0.85482671415  
ATGGGAGA -0.440280422375  
ATGGGAGC -1.24699907629  
ATGGGAGG -0.79993683948  
ATGGGATA 2.20069618031  
ATGGGATC 2.22246160568  
ATGGGATG -0.601812595875  
ATGGGCAA -1.02878232565  
ATGGGCAC -0.476530664218  
ATGGGCAG -0.833401659796  
ATGGGCCA 0.347386406284  
ATGGGCCC -1.64601841256  
ATGGGCCG -0.737053346291  
ATGGGCGA -0.2591849303  
ATGGGCGC -0.572773015125  
ATGGGCGG -0.932752108117  
ATGGGCTA -0.206913518407  
ATGGGCTC -0.404923264116  
ATGGGCTG -0.975853487661  
ATGGGGAA -0.139715328166  
ATGGGGAC -0.78926917466  
ATGGGGAG -0.218199055506  
ATGGGGCA 0.0830592714157  
ATGGGGCC -0.462988269513  
ATGGGGCG -0.326331908755  
ATGGGGGA 0.10731596281  
ATGGGGGC -0.661976451783  
ATGGGGGG -1.37259577307  
ATGGGGTA 0.65748875882  
ATGGGGTC -0.925029537343  
ATGGGGTG 0.513364845327  
ATGGGTAA 0.0325648668587  
ATGGGTAC -0.617121589016  
ATGGGTAG 0.037299250742  
ATGGGTCA -0.395646020102  
ATGGGTCC -0.918628688638

ATGGGTCG -1.27552362468  
ATGGGTGA -0.600133848552  
ATGGGTGC 0.180208237476  
ATGGGTGG -0.106185764494  
ATGGGTTA 0.430535402414  
ATGGGTTC -0.380197131351  
ATGGGTTG -0.603850033879  
ATGGTAAA 1.28346082697  
ATGGTAAC -0.174245603443  
ATGGTAAG 0.0588617025704  
ATGGTAAT 3.0485077125  
ATGGTACA -0.361672412775  
ATGGTACC -0.608365622693  
ATGGTACG 1.71251712475  
ATGGTAGA 1.77818812125  
ATGGTAGC 1.0929175931  
ATGGTAGG 0.564417375079  
ATGGTATA 0.770418241172  
ATGGTATC 1.55497260068  
ATGGTATG -0.553217815491  
ATGGTCAA 0.0529579829087  
ATGGTCAC -0.515296320732  
ATGGTCAG -0.194127226167  
ATGGTCCA 0.470227450991  
ATGGTCCC -0.362852573809  
ATGGTCCG -0.497412165836  
ATGGTCGA -1.06865590544  
ATGGTCGC -0.216244472343  
ATGGTCGG -1.29211624332  
ATGGTCTA -0.899586231397  
ATGGTCTC 0.920619702949  
ATGGTCTG -0.591349986377  
ATGGTGAA 1.04456867093  
ATGGTGAC -1.0956124572  
ATGGTGAG -0.212774561581  
ATGGTGCA -0.169633003684  
ATGGTGCC -0.539268016457  
ATGGTGCG 0.0570445168824  
ATGGTGGA 0.2872346247  
ATGGTGGC -0.73078885417  
ATGGTGGG -0.521105735764  
ATGGTGTA 0.587020925043  
ATGGTGTC 0.512540460481  
ATGGTGTG 0.831508697319  
ATGGTTAA -0.0782961589695  
ATGGTTAC -0.133509750416  
ATGGTTAG 0.423510644268  
ATGGTTCA 0.516144646048  
ATGGTTCC 0.609524341394  
ATGGTTCG -0.0378217775007  
ATGGTTGA -0.0084499446761  
ATGGTTGC 0.207763717324  
ATGGTTGG 0.030172693558  
ATGGTTTA 0.3345674301



ATGGTTTC 0.307473064502  
ATGGTTTG -0.292857304073  
ATGTAAAA 1.01489851904  
ATGTAAAC 0.941066945276  
ATGTAAAG 1.06385094921  
ATGTAAAT 1.99481584927  
ATGTAACA 2.33293895947  
ATGTAACC -0.183234104583  
ATGTAACG -0.404780245836  
ATGTAAGA 0.603560874648  
ATGTAAGC -0.126400472006  
ATGTAAGG -0.0106572559203  
ATGTAATA 0.746705727047  
ATGTAATC 11.5483130994  
ATGTAATG 0.413296599292  
ATGTACAA 0.495239620317  
ATGTACAC 1.46014440287  
ATGTACAG 0.670156181426  
ATGTACAT 1.28865486786  
ATGTACCA 0.504492923862  
ATGTACCC 0.292235268235  
ATGTACCG -0.583427356554  
ATGTACGA 0.577275905082  
ATGTACGC 0.482894665419  
ATGTACGG -0.69451966813  
ATGTACTA 0.656522188405  
ATGTACTC 0.536827545862  
ATGTACTG -0.0346812043205  
ATGTAGAA 0.829982336285  
ATGTAGAC -0.143499379518  
ATGTAGAG 1.6872801232  
ATGTAGCA 0.771771606294  
ATGTAGCC -1.19813428905  
ATGTAGCG -0.897787781728  
ATGTAGGA 1.8240060154  
ATGTAGGC 0.460154758871  
ATGTAGGG 0.0801379096605  
ATGTAGTA 2.14095450937  
ATGTAGTC -0.225025836382  
ATGTAGTG 0.361365766593  
ATGTATAA 1.70577986041  
ATGTATAC 2.12810284924  
ATGTATAG 0.592539515421  
ATGTATCA 2.14503188351  
ATGTATCC 1.63979930324  
ATGTATCG 0.405298817213  
ATGTATGA 0.432993151782  
ATGTATGC 0.976556712916  
ATGTATGG -0.201186333682  
ATGTATTA 1.50838319889  
ATGTATTC 1.68549395603  
ATGTATTG 0.962995374014  
ATGTCAAA 0.150560152457  
ATGTCAAC 0.0398096691418

ATGTCAAG -0.39279897789  
ATGTCAAT -0.202256160381  
ATGTCACA 2.90032162186  
ATGTCACC -0.920574736502  
ATGTCACG 0.597854924079  
ATGTCAGA -0.0307543428664  
ATGTCAGC -0.240027350629  
ATGTCAGG -0.80879897658  
ATGTCATA 0.833307355166  
ATGTCATC 0.634707008495  
ATGTCATG 0.240667497953  
ATGTCCAA -0.424621898387  
ATGTCCAC 1.44245780889  
ATGTCCAG 0.777378047784  
ATGTCCCA 0.525253057711  
ATGTCCCC -0.698381786229  
ATGTCCCG -0.551454339725  
ATGTCCGA -0.737359367939  
ATGTCCGC -0.438533184493  
ATGTCCGG -0.604919444221  
ATGTCCTA -0.10374008945  
ATGTCCTC -0.484921902701  
ATGTCCTG -0.863409684563  
ATGTCGAA 0.640795590213  
ATGTCGAC -0.564776898471  
ATGTCGAG 0.382971519444  
ATGTCGCA 0.794586248742  
ATGTCGCC -0.0162674446139  
ATGTCGCG 0.21966421221  
ATGTCGGA 1.1274004038  
ATGTCGGC 0.228970392965  
ATGTCGGG -0.426159084676  
ATGTCGTA 1.77418298487  
ATGTCGTC -0.335776944231  
ATGTCGTG 0.2020261237  
ATGTCTAA 0.134601019448  
ATGTCTAC 0.372235572243  
ATGTCTAG 0.234308493024  
ATGTCTCA 1.21302380353  
ATGTCTCC 0.237739890858  
ATGTCTCG 0.0543735932511  
ATGTCTGA -0.159411880656  
ATGTCTGC -0.263365977082  
ATGTCTGG -0.947277935654  
ATGTCTTA 0.633943411622  
ATGTCTTC -0.256530660908  
ATGTCTTG 1.25756973016  
ATGTGAAA 1.14928365791  
ATGTGAAC 1.91707157016  
ATGTGAAG 0.641537744753  
ATGTGAAT 0.921045843297  
ATGTGACA 1.38515931485  
ATGTGACC -0.648464867421  
ATGTGACG 0.0206866470181

ATGTGAGA 0.724593893498  
ATGTGAGC -0.0801435304663  
ATGTGAGG -0.186021607889  
ATGTGATA 2.15273197106  
ATGTGATC 2.13660421388  
ATGTGATG 0.138189383488  
ATGTGCAA 0.459255638125  
ATGTGCAC -0.0788507451389  
ATGTGCAG -0.00106254046876  
ATGTGCCA 0.387466290459  
ATGTGCCC -0.432360915222  
ATGTGCCG 0.758412408222  
ATGTGCGA 0.966893506905  
ATGTGCGC 0.162017020042  
ATGTGCGG -0.0392001239826  
ATGTGCTA 0.575863001054  
ATGTGCTC -0.346010557938  
ATGTGCTG 0.118456608027  
ATGTGGAA 1.14565345009  
ATGTGGAC -0.544039456023  
ATGTGGAG 1.35540818173  
ATGTGGCA 0.2464379837  
ATGTGGCC -0.402115775723  
ATGTGGCG -0.111291537915  
ATGTGGGA 0.574159896905  
ATGTGGGC -0.0398569255459  
ATGTGGGG -0.481672660609  
ATGTGGTA 0.351951333282  
ATGTGGTC 0.0540375939728  
ATGTGGTG 1.32398683658  
ATGTGTAA 2.62108436288  
ATGTGTAC 1.63757471323  
ATGTGTAG 0.857320894667  
ATGTGTCA 1.32902911571  
ATGTGTCC -0.115987617048  
ATGTGTCCG -0.264510123323  
ATGTGTGA 0.672724681485  
ATGTGTGC 0.928344355502  
ATGTGTGG -0.656137475477  
ATGTGTTA 0.726350083035  
ATGTGTTC 0.841656125338  
ATGTGTTG -0.192468255753  
ATGTTAAA 1.94585925554  
ATGTTAAC 2.06778244348  
ATGTTAAG 0.0201189456352  
ATGTTAAT 2.19989989949  
ATGTTACA 2.32340711377  
ATGTTACC -0.522025049775  
ATGTTACG -0.0772914919824  
ATGTTAGA 1.33458705173  
ATGTTAGC 0.723354818093  
ATGTTAGG 0.393785949748  
ATGTTATA 1.45182415308  
ATGTTATC 1.51814674669

ATGTTATG 0.0791775845856  
ATGTTCAA 0.272419846111  
ATGTTCAC 0.875159458583  
ATGTTCAG -0.287831054646  
ATGTTCCA 1.77362694145  
ATGTTCCC -0.563934193961  
ATGTTCCG 0.600861222454  
ATGTTCGA 0.10265173491  
ATGTTCGC -0.983423672145  
ATGTTCGG 0.00764054864505  
ATGTTCTA 0.0716544483278  
ATGTTCTC -0.0236025961454  
ATGTTCTG -0.0931546549368  
ATGTTGAA 0.6702500697  
ATGTTGAC 1.17728318141  
ATGTTGAG 0.97787572867  
ATGTTGCA 0.734133858138  
ATGTTGCC 0.331154143751  
ATGTTGCG 1.22682787797  
ATGTTGGA 0.68892051287  
ATGTTGGC 0.79802243467  
ATGTTGGG -0.354929943985  
ATGTTGTA 1.93489243895  
ATGTTGTC 0.10063365746  
ATGTTGTG 2.15586962975  
ATGTTTAA 1.00141524688  
ATGTTTAC 0.130002575793  
ATGTTTAG 1.54689487825  
ATGTTTCA 3.17180341794  
ATGTTTCC 0.702882594406  
ATGTTTCG 0.119624070204  
ATGTTTGA 0.215810213053  
ATGTTTGC -0.286113586216  
ATGTTTGG -0.430514584615  
ATGTTTTA -0.163575856843  
ATGTTTTC 0.532525547667  
ATGTTTTG 0.686682807639  
ATTAAAAA -0.0290499896497  
ATTAAAAC 0.222376563262  
ATTAAAAG 2.82390177113  
ATTAAAAT 1.60705311335  
ATTAAACA 0.474418490316  
ATTAAACC 0.730105197646  
ATTAAACG 0.272089467639  
ATTAAAGA 2.89111703196  
ATTAAAGC -0.313757541711  
ATTAAAGG -0.692114171438  
ATTAAATA 1.75386377201  
ATTAAATC 3.71635228551  
ATTAAATG 0.706647701561  
ATTAACAA 2.50018541066  
ATTAACAC 1.33777925305  
ATTAACAG 2.31632802117  
ATTAACCA 0.290178053322

ATTAACCC -0.498367286461  
ATTAACCG -0.83482538908  
ATTAACGA 0.659226628693  
ATTAACGC -0.865561828639  
ATTAACGG -0.0704815735235  
ATTAACTA 0.287453419769  
ATTAACTC 0.562835222344  
ATTAACTG 0.253866815328  
ATTAAGAA 1.23057757996  
ATTAAGAC 0.945945804686  
ATTAAGAG 2.28912186399  
ATTAAGCA 2.18425927881  
ATTAAGCC 0.0920550587855  
ATTAAGCG 0.381565693467  
ATTAAGGA 1.79966105654  
ATTAAGGC 0.644428712521  
ATTAAGGG 0.883592332664  
ATTAAGTA 1.84577352255  
ATTAAGTC 0.758241910447  
ATTAAGTG 1.41140348153  
ATTAATAA 0.674164024119  
ATTAATAC 1.52378670484  
ATTAATAG 1.52717500983  
ATTAATCA 1.66947757407  
ATTAATCC 1.54693068487  
ATTAATCG 0.674428826524  
ATTAATGA 1.29428358439  
ATTAATGC 0.160201499778  
ATTAATGG -0.446806594232  
ATTAATTA 0.707148577808  
ATTAATTC 0.822670500689  
ATTAATTG 2.222167242  
ATTACAAA 2.59864714713  
ATTACAAC 3.02506437252  
ATTACAAG 3.12524732463  
ATTACAAT 3.33871241261  
ATTACACA 3.6355205186  
ATTACACC 3.65259444475  
ATTACACG 2.16585530347  
ATTACAGA 1.52000619251  
ATTACAGC 1.26258681976  
ATTACAGG 1.06422546142  
ATTACATA 1.50263040827  
ATTACATC 1.53981203845  
ATTACATG 2.52387752334  
ATTACCAA 2.86243239469  
ATTACCAC 1.49079965301  
ATTACCAG 1.88878684281  
ATTACCCA 1.84375211426  
ATTACCCC 3.05027680907  
ATTACCCG 0.437297231757  
ATTACCGA 1.71749507689  
ATTACCGC 3.32384392409  
ATTACCGG 0.955163717973

ATTACCTA 0.866268592921  
ATTACCTC 1.605563808  
ATTACCTG 2.52136960308  
ATTACGAA 2.68130713316  
ATTACGAC 3.87091882341  
ATTACGAG 5.12669593289  
ATTACGCA 4.53142449768  
ATTACGCC 0.632020471514  
ATTACGCG 3.19090603862  
ATTACGGA 4.91208045333  
ATTACGGC 1.41534595634  
ATTACGGG 1.50997659324  
ATTACGTA 3.42687537566  
ATTACGTC 1.66534836361  
ATTACGTG 3.89011158516  
ATTACTAA 1.90672220949  
ATTACTAC 2.93859743556  
ATTACTAG 1.82509374541  
ATTACTCA 2.97008289953  
ATTACTCC 1.1215358216  
ATTACTCG 1.81853863681  
ATTACTGA 1.42963571003  
ATTACTGC -0.000281040288562  
ATTACTGG 0.817833276878  
ATTACTTA 3.11756035229  
ATTACTTC 1.79165702912  
ATTACTTG 1.57007175041  
ATTAGAAA 0.640189792258  
ATTAGAAC 1.49884115247  
ATTAGAAG 1.10387816436  
ATTAGAAT 1.00983209126  
ATTAGACA 0.622827747764  
ATTAGACC 0.302458889399  
ATTAGACG 0.230860857306  
ATTAGAGA 0.446942950816  
ATTAGAGC 0.656747436992  
ATTAGAGG 0.271248428553  
ATTAGATA 2.59631159825  
ATTAGATC 3.02299924684  
ATTAGATG 0.979327561983  
ATTAGCAA 1.34855704403  
ATTAGCAC 0.355610477839  
ATTAGCAG 1.26308436516  
ATTAGCCA 1.21986557323  
ATTAGCCC -0.159612147884  
ATTAGCCG 0.20831663807  
ATTAGCGA 1.45316773384  
ATTAGCGC -0.18085254836  
ATTAGCGG -0.861860840306  
ATTAGCTA -0.185757638196  
ATTAGCTC 0.822721920653  
ATTAGCTG 0.827299754687  
ATTAGGAA 0.0879930898149  
ATTAGGAC 0.603713677294

ATTAGGAG -0.574925991914  
ATTAGGCA 1.75375302131  
ATTAGGCC -0.436348564649  
ATTAGGCG 0.505163048817  
ATTAGGGA -0.765482340992  
ATTAGGGC -0.310772893846  
ATTAGGGG 0.093174223668  
ATTAGGTA 1.82226648011  
ATTAGGTC 1.00175124616  
ATTAGGTG 1.24460607027  
ATTAGTAA -0.069117799501  
ATTAGTAC 1.86355150667  
ATTAGTAG 1.16913967474  
ATTAGTCA 0.716012380332  
ATTAGTCC 0.159385858407  
ATTAGTCG 0.240623572397  
ATTAGTGA 0.330363067383  
ATTAGTGC 0.172684060328  
ATTAGTGG 1.09477225083  
ATTAGTTA 0.539283421628  
ATTAGTTC 0.399367201701  
ATTAGTTG 0.846243119204  
ATTATAAA 2.82003028502  
ATTATAAC 2.1009256288  
ATTATAAG 2.11332970625  
ATTATAAT 6.84176552799  
ATTATACA 0.637199107231  
ATTATACC 0.853254970314  
ATTATACG 1.5898590685  
ATTATAGA 2.05640926345  
ATTATAGC 0.848866786431  
ATTATAGG 1.71972882673  
ATTATATA 1.87846537799  
ATTATATC 3.0465383487  
ATTATATG 2.09418191094  
ATTATCAA 1.34426462202  
ATTATCAC 2.38670654659  
ATTATCAG 2.72551497873  
ATTATCCA 2.8567095817  
ATTATCCC 3.80466680214  
ATTATCCG 3.1300660206  
ATTATCGA 0.971323118209  
ATTATCGC 0.935074333612  
ATTATCGG 0.989117340213  
ATTATCTA 2.19999128963  
ATTATCTC 2.42926832878  
ATTATCTG 2.08611418106  
ATTATGAA 1.1791921736  
ATTATGAC 0.842554829728  
ATTATGAG 1.34102807879  
ATTATGCA 1.76776673099  
ATTATGCC 1.18797895026  
ATTATGCG 2.05768789267  
ATTATGGA 3.1395826693

ATTATGGC 0.371101210367  
ATTATGGG 0.384245985108  
ATTATGTA 2.96593890843  
ATTATGTC 1.09174367741  
ATTATGTG 1.42470896969  
ATTATTAA 3.17379380772  
ATTATTAC 2.74545426676  
ATTATTAG 3.18438715299  
ATTATTCA 1.8433099442  
ATTATTCC 2.91567349967  
ATTATTCCG 2.66725553509  
ATTATTGA 2.21925399918  
ATTATTGC 0.593790248794  
ATTATTGG 1.11453812659  
ATTATTTA 1.43183781683  
ATTATTTTC 1.9838867129  
ATTATTTG 1.74466188842  
ATTCAAAA 0.975778127228  
ATTCAAAC -0.368309335323  
ATTCAAAG 1.39170859447  
ATTCAAAT 2.43487123124  
ATTCACA 0.93877282381  
ATTCACC 1.01916720876  
ATTCACCG 1.56647568378  
ATTCAGA 0.191242711917  
ATTCAGC 0.0347536502616  
ATTCAGG -0.517135781466  
ATTCATA 1.26133504549  
ATTCATC 0.772509389096  
ATTCATG 0.794232346156  
ATTCACAA 3.33832395247  
ATTCACAC 1.28315751163  
ATTCACAG 2.33898070114  
ATTCACCA 1.16618958442  
ATTCACCC 0.696913298677  
ATTCACCG 0.974616077679  
ATTCACGA 0.15602315931  
ATTCACGC 0.303155869314  
ATTCACGG 0.880055388588  
ATTCACTA 1.01085882511  
ATTCACTC 0.767030560715  
ATTCACTG 0.111192028835  
ATTCAGAA 1.67017372128  
ATTCAGAC 1.45316773384  
ATTCAGAG 1.98076154489  
ATTCAGCA 0.99155552085  
ATTCAGCC 0.339144431422  
ATTCAGCG 0.118495329133  
ATTCAGGA 2.5873647327  
ATTCAGGC 0.0307000084106  
ATTCAGGG 0.509085122177  
ATTCAGTA 1.68990795398  
ATTCAGTC 0.785677063417  
ATTCAGTG 1.88310566542



ATTCATAA 1.92482162043  
ATTCATAC 1.55316519936  
ATTCATAG 1.08035842305  
ATTCATCA 0.960894233546  
ATTCATCC 0.946998560789  
ATTCATCG 0.885074976319  
ATTCATGA 0.755457113454  
ATTCATGC 0.670478024601  
ATTCATGG 0.756276918385  
ATTCATTA -0.431510924482  
ATTCATTC 0.811268592093  
ATTCATTG 0.660363072349  
ATTCCAAA 1.4702718458  
ATTCCAAC 0.947706782316  
ATTCCAAG 1.09554708931  
ATTCCAAT 1.05311708379  
ATTCCACA 1.46004114659  
ATTCCACC 0.976264639194  
ATTCCACG 2.45006676738  
ATTCCAGA 0.00948063391216  
ATTCCAGC 0.539166425597  
ATTCCAGG 0.283936877136  
ATTCCATA 3.20221801432  
ATTCCATC 1.47427656582  
ATTCCATG 1.40538755394  
ATTCCCAA 1.91618265014  
ATTCCCAC 4.2767135206  
ATTCCCAG 0.691294574686  
ATTCCCCA 1.32914944259  
ATTCCCCC 3.38815260381  
ATTCCCCG 0.363765226123  
ATTCCCGA 1.5325385076  
ATTCCCGC 1.08609060405  
ATTCCCGG 1.30066611343  
ATTCCCTA 3.54677507353  
ATTCCCTC 3.59971994122  
ATTCCCTG 2.75963243705  
ATTCCGAA 1.00386258735  
ATTCCGAC 1.04284141813  
ATTCCGAG 2.05027384168  
ATTCCGCA 1.58316031709  
ATTCCGCC 1.37413129393  
ATTCCGCG 3.17290592858  
ATTCCGGA 2.19902825824  
ATTCCGGC 1.19629233018  
ATTCCGGG 0.60494858914  
ATTCCGTA 3.08091373955  
ATTCCGTC 1.60426456916  
ATTCCGTG 2.99759611925  
ATTCCTAA 2.32515705797  
ATTCCTAC 1.37823614757  
ATTCCTAG 1.76722172101  
ATTCCTCA 4.04268232066  
ATTCCTCC 0.858015168269

ATTCCTCG 2.72056450609  
ATTCCTGA 1.10359483411  
ATTCCTGC 0.961744640641  
ATTCCTGG 0.762914049111  
ATTCCTTA 2.10297472477  
ATTCCTTC 0.938333568248  
ATTCCTTG 2.88866740154  
ATTCGAAA 1.97339620755  
ATTCGAAC 1.14015630205  
ATTCGAAG 0.604125869717  
ATTCGAAT 0.972231190608  
ATTCGACA 1.16371580535  
ATTCGACC -0.302502814955  
ATTCGACG 0.197224706503  
ATTCGAGA 1.08035842305  
ATTCGAGC 0.415649843308  
ATTCGAGG 0.288650026865  
ATTCGATA 1.81400826736  
ATTCGATC 1.30863475059  
ATTCGATG 0.634216332969  
ATTCGCAA 4.77295697519  
ATTCGCAC 3.09678023335  
ATTCGCAG 2.39063319986  
ATTCGCCA 1.85576814793  
ATTCGCCC 1.31659027254  
ATTCGCCG 2.6926717779  
ATTCGCGA 3.71349816524  
ATTCGCGC 1.18991084203  
ATTCGCGG 2.21349537958  
ATTCGCTA 4.18783338436  
ATTCGCTC 0.735828426989  
ATTCGCTG 3.761765898  
ATTCGGAA 0.649512002718  
ATTCGGAC 1.03652508969  
ATTCGGAG 0.815466501292  
ATTCGGCA 2.36437945699  
ATTCGGCC 0.528554760657  
ATTCGGCG 1.5312861088  
ATTCGGGA 2.89207881428  
ATTCGGGC 0.960769743107  
ATTCGGGG 1.01832804327  
ATTCGGTA 3.75620254936  
ATTCGGTC 0.640920913364  
ATTCGGTG 1.74495666846  
ATTCGTAA 2.00629832275  
ATTCGTAC 0.803260609293  
ATTCGTAG 1.57837326417  
ATTCGTCA 1.61240682676  
ATTCGTCC 0.926221772701  
ATTCGTCT 1.61655997769  
ATTCGTGA 0.992131341174  
ATTCGTGC 0.237384322849  
ATTCGTGG 1.76185614146  
ATTCGTTA 1.57496310049

ATTCGTTTC 1.60408532791  
ATTCGTTG 0.95552782128  
ATTCTAAA 2.5382934329  
ATTCTAAC 1.96476306624  
ATTCTAAG 1.29432584452  
ATTCTACA 1.54079672035  
ATTCTACC 2.32049990812  
ATTCTACG 1.30126254338  
ATTCTAGA 2.92879100309  
ATTCTAGC 1.85968730679  
ATTCTAGG 0.764268246946  
ATTCTATA 1.27010225343  
ATTCTATC 2.37556007239  
ATTCTATG 1.27922253124  
ATTCTCAA 2.65945344032  
ATTCTCAC 2.63029977803  
ATTCTCAG 2.05348706898  
ATTCTCCA 3.25270763079  
ATTCTCCC 1.59963344156  
ATTCTCCG 2.50829727428  
ATTCTCGA 2.13179655134  
ATTCTCGC 1.2828381666  
ATTCTCGG 1.22282253342  
ATTCTCTA 2.29932050379  
ATTCTCTC 2.58476000967  
ATTCTCTG 5.73176630615  
ATTCTGAA 1.20686506583  
ATTCTGAC 3.66022291908  
ATTCTGAG 0.764276365888  
ATTCTGCA 1.56552264493  
ATTCTGCC 1.78047828733  
ATTCTGCG 2.17098210287  
ATTCTGGA 1.53015778409  
ATTCTGGC 2.33202942982  
ATTCTGGG 1.07423882281  
ATTCTGTA 1.66201480943  
ATTCTGTC 3.6827729673  
ATTCTGTG 1.60033604228  
ATTCTTAA 1.99925399587  
ATTCTTAC 2.22490061903  
ATTCTTAG 3.15949489419  
ATTCTTCA 4.11135170477  
ATTCTTCC 0.514294360059  
ATTCTTCG 0.681011622794  
ATTCTTGA 1.66947757407  
ATTCTTGC 0.529300037867  
ATTCTTGG 1.81415128564  
ATTCTTTA 3.63447379966  
ATTCTTTC 1.36179258437  
ATTCTTTG 1.92255976655  
ATTGAAAA 1.6976423909  
ATTGAAAC 0.35860282829  
ATTGAAAG 0.5669048939  
ATTGAAAT 2.60393611719

ATTGAACA -0.461073864703  
ATTGAACC 1.16437114967  
ATTGAACG 1.28185556648  
ATTGAAGA 0.30444157659  
ATTGAAGC -0.238166447563  
ATTGAAGG -0.908875133379  
ATTGAATA 0.811042302616  
ATTGAATC 1.4677491449  
ATTGAATG 0.48438813433  
ATTGACAA 2.60945283396  
ATTGACAC -0.531583334078  
ATTGACAG 0.431026494296  
ATTGACCA 0.361652635865  
ATTGACCC -0.585136706042  
ATTGACCG 0.00803775225288  
ATTGACGA 0.79051511994  
ATTGACGC -0.34508166774  
ATTGACGG -0.850206619984  
ATTGACTA 0.476927243292  
ATTGACTC -0.153739446743  
ATTGACTG -0.359334782108  
ATTGAGAA 0.817125055351  
ATTGAGAC 0.926301504871  
ATTGAGAG 0.431555890929  
ATTGAGCA -0.0578522474895  
ATTGAGCC -1.38018115454  
ATTGAGCG 0.235217398135  
ATTGAGGA 1.47623510437  
ATTGAGGC 0.216735980581  
ATTGAGGG 0.0166579865261  
ATTGAGTA 0.736311191752  
ATTGAGTC 0.0573230590351  
ATTGAGTG 0.492903446896  
ATTGATAA 1.90719144268  
ATTGATAC 1.61939119838  
ATTGATAG 1.29293396647  
ATTGATCA 0.870801876864  
ATTGATCC 0.351655512356  
ATTGATCG 1.1602637979  
ATTGATGA 0.18110236195  
ATTGATGC -0.130819882588  
ATTGATGG -0.384453954922  
ATTGATTA 2.83511361322  
ATTGATTC 4.44075965153  
ATTGATTG 1.90410333035  
ATTGCAAA 2.07812597517  
ATTGCAAC 1.39350662778  
ATTGCAAG 1.24195971164  
ATTGCAAT 2.13562182194  
ATTGCACA 1.10012783784  
ATTGCACC 0.930069734696  
ATTGCACG 3.87665475161  
ATTGCAGA 2.39318796017  
ATTGCAGC 0.848356542174

ATTGCAGG 0.385043098638  
ATTGCATA 3.60085222132  
ATTGCATC 1.164456919  
ATTGCATG 2.30392852364  
ATTGCCAA 2.34097192363  
ATTGCCAC 1.87625286229  
ATTGCCAG 1.95540962908  
ATTGCCCA 2.23570880399  
ATTGCCCC 1.20940900089  
ATTGCCCG 0.638948218716  
ATTGCCGA 0.742418093133  
ATTGCCGC 0.0546169533232  
ATTGCCGG -0.0879119003982  
ATTGCCTA 1.16547636663  
ATTGCCTC 0.895741600249  
ATTGCCTG 2.33263439507  
ATTGCGAA 3.95404866717  
ATTGCGAC 3.82377879083  
ATTGCGAG 1.50404102234  
ATTGCGCA 2.52163627908  
ATTGCGCC 2.00021536184  
ATTGCGCG 3.94451161702  
ATTGCGGA 2.90472146371  
ATTGCGGC 2.01219891974  
ATTGCGGG 1.42525397967  
ATTGCGTA 3.58157785379  
ATTGCGTC 2.07289529495  
ATTGCGTG 4.35289209304  
ATTGCTAA 1.55365233586  
ATTGCTAC 2.4694110827  
ATTGCTAG 0.87916792581  
ATTGCTCA 2.77426235358  
ATTGCTCC 0.585741879463  
ATTGCTCG 1.18525931298  
ATTGCTGA 1.8767645638  
ATTGCTGC 0.142185776391  
ATTGCTGG 0.151851688716  
ATTGCTTA 1.36638957078  
ATTGCTTC 1.45175836884  
ATTGCTTG 1.8092509839  
ATTGAAA 1.57832684048  
ATTGAAAC 1.76330630935  
ATTGAAAG 1.41805934828  
ATTGACA 0.350971647654  
ATTGACC -0.804063759984  
ATTGACG 0.450554838969  
ATTGAGA 0.484201815028  
ATTGAGC 0.352545681448  
ATTGAGG -0.660306031579  
ATTGATA 4.36029844144  
ATTGATC 1.44800908321  
ATTGATG 0.267445849359  
ATTGCAA 1.02421739865  
ATTGCAC -0.448057327605

ATTGGCAG -0.317075274362  
ATTGGCCA 0.182689719135  
ATTGGCCC -0.359080804958  
ATTGGCCG -0.673161855268  
ATTGGCGA 1.78072227194  
ATTGGCGC -0.173630645656  
ATTGGCGG -1.1000100091  
ATTGGCTA 0.121304066595  
ATTGGCTC -0.66258308245  
ATTGGCTG 0.907194304275  
ATTGGGAA 0.487318447739  
ATTGGGAC 0.508737048575  
ATTGGGAG 0.170904971213  
ATTGGGCA 0.331154143751  
ATTGGGCC -0.787523602201  
ATTGGGCG 0.33077276167  
ATTGGGGA 0.757607175751  
ATTGGGGC 0.537625283926  
ATTGGGGG -0.710496912624  
ATTGGGTA 0.215366585753  
ATTGGGTC 0.12073865517  
ATTGGGTG -0.153546465745  
ATTGGTAA 1.77661096478  
ATTGGTAC 1.60636508509  
ATTGGTAG 1.01433623028  
ATTGGTCA 0.619770862137  
ATTGGTCC -0.577309213561  
ATTGGTCG 1.08368385829  
ATTGGTGA 1.09123447404  
ATTGGTGC -0.126017840857  
ATTGGTGG 0.412380616129  
ATTGGTTA 1.56400044746  
ATTGGTTC 0.231426268731  
ATTGGTTG -0.104497857339  
ATTGTAAG 1.10305232226  
ATTGTAAC 2.27374084126  
ATTGTAAG 1.68249140486  
ATTGTACA 1.07797270327  
ATTGTACC 1.68134330323  
ATTGTACG 2.08795822171  
ATTGTAGA 2.169550671  
ATTGTAGC 0.0607992151376  
ATTGTAGG 0.18507731252  
ATTGTATA 2.23056639124  
ATTGTATC 0.719227481233  
ATTGTATG 1.00343165891  
ATTGTCAA 2.69078318716  
ATTGTCAC 1.25319133064  
ATTGTCAG 1.45854975945  
ATTGTCCA 1.88720843727  
ATTGTCCC 1.48795469258  
ATTGTCCG 1.64133357504  
ATTGTCGA 1.27189966221  
ATTGTCGC 0.109549088126

ATTGTCGG 0.836679630451  
ATTGTCTA 2.00374647693  
ATTGTCTC 0.246598072576  
ATTGTCTG 1.97045423617  
ATTGTGAA 1.44817520925  
ATTGTGAC 1.51606267682  
ATTGTGAG 1.75069238848  
ATTGTGCA 2.22645508409  
ATTGTGCC 1.33754359556  
ATTGTGCG 3.39874698998  
ATTGTGGA 2.63965966871  
ATTGTGGC 0.420406710414  
ATTGTGGG 1.64236717877  
ATTGTGTA 1.36633461179  
ATTGTGTC 1.90241854587  
ATTGTGTG 2.68652636359  
ATTGTTAA 1.38934494155  
ATTGTTAC 2.38121689295  
ATTGTTAG 2.26893401144  
ATTGTTCA 0.336770369606  
ATTGTTCC 0.702938802464  
ATTGTTCG 1.68390597431  
ATTGTTGA 1.17555738587  
ATTGTTGC 1.57198677975  
ATTGTTGG 1.77789750477  
ATTGTTTA 0.927092789417  
ATTGTTTC 1.02827291411  
ATTGTTTG -0.205950070662  
ATTTAAAA 2.27768414878  
ATTTAAAC 1.3576227792  
ATTTAAAG 3.29523485543  
ATTTAAAT 1.11181141126  
ATTTAACA 2.01794213417  
ATTTAACC 0.738330726447  
ATTTAACG 0.256183003662  
ATTTAAGA 1.59982329989  
ATTTAAGC 0.723312557961  
ATTTAAGG -0.121350282109  
ATTTAATA 2.69860380976  
ATTTAATC 1.19546856986  
ATTTAATG 1.93690635284  
ATTTACAA 2.80548655417  
ATTTACAC 2.4950440388  
ATTTACAG 2.21181496684  
ATTTACCA 1.97937632853  
ATTTACCC 1.13031947559  
ATTTACCG 0.663366456232  
ATTTACGA 1.76534582913  
ATTTACGC 1.82765787373  
ATTTACGG 0.0224382566388  
ATTTACTA 1.18564423409  
ATTTACTC 0.987643231855  
ATTTACTG 1.96186481224  
ATTTAGAA 2.84974852602

ATTTAGAC 1.60769721606  
ATTTAGAG 1.67180479584  
ATTTAGCA 0.439397539513  
ATTTAGCC -0.669610338732  
ATTTAGCG 1.46781014105  
ATTTAGGA 0.470493086108  
ATTTAGGC 1.2364048983  
ATTTAGGG 0.857744120524  
ATTTAGTA 2.2160226604  
ATTTAGTC 0.910264721472  
ATTTAGTG 1.26335145752  
ATTTATAA 4.22576008357  
ATTTATAC 3.39416978048  
ATTTATAG 1.21356360907  
ATTTATCA 2.72363887867  
ATTTATCC 1.91828399878  
ATTTATCG 1.77348912762  
ATTTATGA 2.82159994707  
ATTTATGC -0.13753820273  
ATTTATGG 0.360759344104  
ATTTATTA 2.91919212408  
ATTTATTC 3.22430486651  
ATTTATTG 2.68051439137  
ATTTCAAA 1.83484334529  
ATTTCAAC 2.71887743165  
ATTTCAAG 2.65158556131  
ATTTCACA 3.97913120065  
ATTTCACC 3.70025679592  
ATTTCACG 2.34895138604  
ATTTCAGA 2.49612510711  
ATTTCAGC 1.68516420209  
ATTTCAGG 0.729715904802  
ATTTCATA 5.36226119645  
ATTTCATC 2.50708401294  
ATTTCATG 3.42687537566  
ATTTCCAA 5.82728440583  
ATTTCCAC 4.01983249613  
ATTTCCAG 2.39288984929  
ATTTCCCA 2.23764548385  
ATTTCCCC 3.32960504183  
ATTTCCCG 2.7346044462  
ATTTCCGA 4.24957252313  
ATTTCCGC 3.18611544668  
ATTTCCGG 1.43442047299  
ATTTCCTA 5.03086889707  
ATTTCCTC 4.12240179256  
ATTTCCTG 3.58351203551  
ATTTCGAA 2.63597679186  
ATTTCGAC 4.18815189669  
ATTTCGAG 3.16119383478  
ATTTCGCA 4.36653129051  
ATTTCGCC 0.263786496624  
ATTTCGCG 2.82384327311  
ATTTCGGA 3.6665394557



ATTTCCGC 2.5400054887  
ATTTCCGG 3.03546161413  
ATTTCCGTA 4.88836356747  
ATTTCCGTC 3.17072026785  
ATTTCCGTG 5.01153124344  
ATTTCTAA 0.744028974432  
ATTTCTAC 2.44351540598  
ATTTCTAG 2.7085155803  
ATTTCTCA 3.60389953076  
ATTTCTCC 1.53919354163  
ATTTCTCG 3.89076547223  
ATTTCTGA 1.76690695589  
ATTTCTGC 2.67789592859  
ATTTCTGG 1.10541951421  
ATTTCTTA 2.07301895268  
ATTTCTTC 2.30676494877  
ATTTCTTG 3.21684335094  
ATTTGAAA 2.13419122278  
ATTTGAAC 2.92092041776  
ATTTGAAG 2.27482628131  
ATTTGACA 0.843097341574  
ATTTGACC 1.8817058766  
ATTTGACG 1.41556995586  
ATTTGAGA 2.09105965743  
ATTTGAGC 0.854942044758  
ATTTGAGG 0.985891622234  
ATTTGATA 2.72363887867  
ATTTGATC 0.984240354405  
ATTTGATG 1.42019546265  
ATTTGCAA 3.57241385861  
ATTTGCAC 3.63380263382  
ATTTGCAG 3.16376129395  
ATTTGCCA 6.99361138773  
ATTTGCCC 0.0183458936814  
ATTTGCCG 2.63040261796  
ATTTGCGA 2.12929862362  
ATTTGCGC 2.38818648393  
ATTTGCGG 1.31470438811  
ATTTGCTA 1.83037959279  
ATTTGCTC 1.50070309642  
ATTTGCTG 1.83194113591  
ATTTGGAA 1.42190731028  
ATTTGGAC 1.49740867971  
ATTTGGAG 0.869675217574  
ATTTGGCA 2.21748698439  
ATTTGGCC -0.799518401717  
ATTTGGCG 1.00314853684  
ATTTGGGA 2.05701297962  
ATTTGGGC 1.00666632854  
ATTTGGGG 0.113768023302  
ATTTGGTA 2.65329428626  
ATTTGGTC 0.78903393353  
ATTTGGTG 1.62898029302  
ATTTGTAA 2.26239097717

ATTTGTAC 1.77487018042  
ATTTGTAG 4.04893598753  
ATTTGTCA 3.05689915916  
ATTTGTCC 0.444218109085  
ATTTGTCCG 0.97660084665  
ATTTGTGA 2.20276380412  
ATTTGTGC 0.855146891901  
ATTTGTGG 0.630571136337  
ATTTGTGA 3.42377331541  
ATTTGTTC 1.48624451038  
ATTTGTTG 1.88272719783  
ATTTTAAA 2.63531603492  
ATTTTAAC 1.85657421311  
ATTTTAAG 2.15873082806  
ATTTTACA 2.31220339062  
ATTTTACC 1.68951949385  
ATTTTACG 1.1402418632  
ATTTTAGA 2.46524669016  
ATTTTAGC 0.571631783376  
ATTTTAGG 1.44388091364  
ATTTTATA 2.35369867696  
ATTTTATC 2.53243322244  
ATTTTATG 2.14581588183  
ATTTTCAA 3.51676892236  
ATTTTCAC 4.14656709382  
ATTTTCAG 2.80976565279  
ATTTTCCA 3.20850915323  
ATTTTCCC 1.81227601829  
ATTTTCCG 3.4875563457  
ATTTTCGA 1.73779451284  
ATTTTCGC 1.34884849322  
ATTTTCGG 1.5643027219  
ATTTTCTA 5.07096834998  
ATTTTCTC 2.51771587115  
ATTTTCTG 3.53102953114  
ATTTTGAA 1.14206237974  
ATTTTGAC 1.97798257688  
ATTTTGAG 2.69629220135  
ATTTTGCA 1.76990638439  
ATTTTGCC 1.25203615097  
ATTTTGCG 3.07572240498  
ATTTTGGA 4.55191275108  
ATTTTGGC 1.19285447883  
ATTTTGGG 2.19634463575  
ATTTTGTA 3.98578623469  
ATTTTGTC 3.88112579034  
ATTTTGTG 2.72734611234  
ATTTTTAA 1.96054538013  
ATTTTTAC 4.57419966232  
ATTTTTAG 2.12282178995  
ATTTTTCA 3.51370599957  
ATTTTTCC 0.97067110474  
ATTTTTCCG 3.68558482743  
ATTTTTGA 1.80352504824

ATTTTTGC 0.313567267026  
ATTTTTGG 1.14124299117  
ATTTTTTA 2.72560865883  
ATTTTTTC 3.36472175451  
ATTTTTTG 2.41143871651  
CAAAAAAA 0.755687150135  
CAAAAAAC 1.75766676755  
CAAAAAAG 1.30063405402  
CAAAAACA 0.296604091565  
CAAAAACC 0.200036566635  
CAAAAACG -0.117169651683  
CAAAAAGA 0.699595880276  
CAAAAAGC 0.173177025812  
CAAAAAGG 0.433125136629  
CAAAAATA 1.43531938556  
CAAAAATC 7.33450742877  
CAAAAATG 0.948035079009  
CAAAACAA 0.625614002003  
CAAAACAC 0.841996079998  
CAAAACAG 1.02277139432  
CAAAACCA 0.353206022037  
CAAAACCC -0.698650335838  
CAAAACCG 0.551851959689  
CAAAACGA 0.16458468739  
CAAAACGC -0.465482658208  
CAAAACGG -0.421175095381  
CAAAACTA 2.41540471543  
CAAAACTC -0.116746634005  
CAAAACTG 0.863830620462  
CAAAAGAA 0.0662393224122  
CAAAAGAC 0.139087671521  
CAAAAGAG -0.59599214741  
CAAAAGCA 1.46711899012  
CAAAAGCC -0.976549218508  
CAAAAGCG 0.350580689386  
CAAAAGGA 1.26466589336  
CAAAAGGC -1.35056387987  
CAAAAGGG -0.915499773425  
CAAAAGTA -0.120779458057  
CAAAAGTC -0.302143083385  
CAAAAGTG -0.188070287504  
CAAAATAA 2.63987721471  
CAAAATAC 3.49901238057  
CAAAATAG 1.60593415665  
CAAAATCA 4.36552912166  
CAAAATCC 7.51517553143  
CAAAATCG 5.77415155341  
CAAAATGA 1.58707989231  
CAAAATGC -0.28192254689  
CAAAATGG 0.0339132357098  
CAAAATTA 1.01699112421  
CAAAATTC 2.0677576703  
CAAAATTG 2.01682588378  
CAAACAAA 0.17106901547

CAAACAAC 0.205672985756  
CAAACAAG 0.953090265177  
CAAACACA -0.0577398313741  
CAAACACC 0.100387174718  
CAAACACG -0.324018010379  
CAAACAGA 0.801711765036  
CAAACAGC 0.253028274378  
CAAACAGG 0.810485426489  
CAAACATA -0.37676427627  
CAAACATC 0.355567593173  
CAAACATG 0.36439891993  
CAAACCAA 0.335917464375  
CAAACCAC 1.07549122161  
CAAACCAG 0.788216002201  
CAAACCCA -0.841967143258  
CAAACCCC -0.883822161166  
CAAACCCG -0.295779290362  
CAAACCGA 0.261297936914  
CAAACCGC -0.948654408534  
CAAACCGG -0.396523698514  
CAAACCTA 1.63283803938  
CAAACCTC -0.106229065517  
CAAACCTG 0.132883759196  
CAAACGAA 0.729291638055  
CAAACGAC 1.26917253052  
CAAACGAG -0.277225843223  
CAAACGCA 0.877159840903  
CAAACGCC -0.719906766019  
CAAACGCG 0.326272994383  
CAAACGGA 0.648664718293  
CAAACGGC -1.24804079896  
CAAACGGG -0.179871613664  
CAAACGTA 0.303309088316  
CAAACGTC 0.515718089343  
CAAACGTG 1.35877379532  
CAAACCTAA 1.28304509552  
CAAACCTAC 0.667101585756  
CAAACCTAG 0.741908889766  
CAAACCTCA 0.301729433716  
CAAACCTCC -0.941310097171  
CAAACCTCG 0.588485040858  
CAAACCTGA 0.397021243914  
CAAACCTGC -0.906106366091  
CAAACCTGG -1.22426874592  
CAAACCTTA -0.35850123743  
CAAACCTTC -0.720567314786  
CAAACCTTG 0.121986265873  
CAAAGAAA 1.55699650711  
CAAAGAAC 0.83409884789  
CAAAGAAG 0.122306651802  
CAAAGACA -0.0651665812219  
CAAAGACC -0.385684078673  
CAAAGACG -0.119139015483  
CAAAGAGA 1.4907430286

CAAAGAGC -0.578090297385  
CAAAGAGG 0.379142501646  
CAAAGATA 3.02363835328  
CAAAGATC 1.59339309808  
CAAAGATG 0.497546232463  
CAAAGCAA 0.369705168756  
CAAAGCAC 0.221208476551  
CAAAGCAG 0.438068531215  
CAAAGCCA -0.480425258084  
CAAAGCCC -0.49339537149  
CAAAGCCG 0.213682425802  
CAAAGCGA 0.885414722801  
CAAAGCGC 0.0798150255957  
CAAAGCGG -0.509505225364  
CAAAGCTA -1.04888919696  
CAAAGCTC -0.838537619025  
CAAAGCTG -0.116418961846  
CAAAGGAA -1.03493856522  
CAAAGGAC 0.689010445763  
CAAAGGAG -0.470929010822  
CAAAGGCA -0.884938411557  
CAAAGGCC -1.22983625813  
CAAAGGCG -0.91659895322  
CAAAGGGA -0.241342827358  
CAAAGGGC -1.33823349743  
CAAAGGGG -0.686237514916  
CAAAGGTA -0.902291296219  
CAAAGGTC -0.388140787151  
CAAAGGTG -0.620712243014  
CAAAGTAA 0.707594495066  
CAAAGTAC 0.644802600194  
CAAAGTAG 0.514548961743  
CAAAGTCA 0.829783734481  
CAAAGTCC -0.565927290052  
CAAAGTCG 0.410421661229  
CAAAGTGA 0.41589424427  
CAAAGTGC -1.37748066964  
CAAAGTGG -0.435880580525  
CAAAGTTA -0.292276903833  
CAAAGTTC 0.27834355086  
CAAAGTTG 0.638725468265  
CAAATAAA 0.183231190091  
CAAATAAC 1.83086693747  
CAAATAAG 0.82043154639  
CAAATACA 1.07191368283  
CAAATACC 0.0515619412975  
CAAATACG 2.23837077597  
CAAATAGA 1.30183690646  
CAAATAGC -0.204737225684  
CAAATAGG 0.0294979886875  
CAAATATA 2.77645779868  
CAAATATC 5.76215841931  
CAAATATG 2.11208313643  
CAAATCAA 2.40299355993

CAAATCAC 4.81292236147  
CAAATCAG 2.78406961876  
CAAATCCA 6.79983202698  
CAAATCCC 3.35829488356  
CAAATCCG 5.1106495733  
CAAATCGA 3.20747575768  
CAAATCGC 2.68821905883  
CAAATCGG 2.63940610792  
CAAATCTA 5.06396316056  
CAAATCTC 7.73898935554  
CAAATCTG 9.45067730735  
CAAATGAA 0.489190592417  
CAAATGAC 1.12919697986  
CAAATGAG 0.48769358448  
CAAATGCA 0.814116675195  
CAAATGCC -0.591838788301  
CAAATGCG -0.0418620959603  
CAAATGGA 0.384422728223  
CAAATGGC -0.631191090396  
CAAATGGG -0.232744659952  
CAAATGTA -0.283746186096  
CAAATGTC 0.0535966729867  
CAAATGTG 0.601161415118  
CAAATTTAA -0.0547491463478  
CAAATTTAC 2.94661062281  
CAAATTTAG 0.505163048817  
CAAATTTCA 3.00317258311  
CAAATTTCC 2.07850569183  
CAAATTTCG 3.27937835417  
CAAATTTGA 0.356199621555  
CAAATTTGC 1.3962581163  
CAAATTTGG 0.276281131498  
CAAATTTTA 1.23234209661  
CAAATTTTC 3.63737018006  
CAAATTTTG 1.94410931134  
CAACAAAA 1.48073507983  
CAACAAAC 1.95796251579  
CAACAAAG 1.09649513189  
CAACAACA -0.0493506746715  
CAACAACC -0.92574296332  
CAACAACG 0.719063645154  
CAACAAGA 1.06363777495  
CAACAAGC 0.388938941571  
CAACAAGG -0.385008541091  
CAACAATA 1.86685737318  
CAACAATC 1.47976247226  
CAACAATG 1.19979513306  
CAACACAA 0.564093241947  
CAACACAC -0.183771620157  
CAACACAG -0.21189459321  
CAACACCA -0.197900244086  
CAACACCC -0.842229863883  
CAACACCG -0.0498482200713  
CAACACGA -0.0432477286719

CAACACGC -1.09840037687  
CAACACGG -1.10060290002  
CAACACTA 0.233209937763  
CAACACTC -0.324167482177  
CAACACTG 1.09674765179  
CAACAGAA 1.0006337467  
CAACAGAC 0.56333214321  
CAACAGAG -1.0701252257  
CAACAGCA -0.278204487962  
CAACAGCC -1.07186996545  
CAACAGCG 0.0130806559196  
CAACAGGA -0.388341470735  
CAACAGGC -1.09457718805  
CAACAGGG -0.300202448148  
CAACAGTA 0.179038901697  
CAACAGTC -0.673556768918  
CAACAGTG 0.122487974833  
CAACATAA 1.10082065419  
CAACATAC 0.568725826792  
CAACATAG 0.615486350893  
CAACATCA 0.677402024599  
CAACATCC 0.734553128613  
CAACATCG 1.00576450148  
CAACATGA 0.733745606184  
CAACATGC -0.210016411371  
CAACATGG -0.353058632019  
CAACATTA 2.00053324963  
CAACATTC 0.248002649485  
CAACATTG 0.612996125758  
CAACCAA 1.12750178648  
CAACCAAC -0.662691751362  
CAACCAAG 0.0478295180874  
CAACCACA -0.224759784909  
CAACCACC -0.901597022617  
CAACCACG -0.839086792567  
CAACCAGA 0.607475245423  
CAACCAGC -0.898698560441  
CAACCAGG -0.4566338445  
CAACCATA 0.11307166792  
CAACCATC -0.706032743774  
CAACCATG 0.190137911316  
CAACCCAA 0.329401701418  
CAACCCAC -0.262162083757  
CAACCCAG 0.224253496033  
CAACCCCA -0.556191846278  
CAACCCCG -1.10388211974  
CAACCCCG -0.767547674846  
CAACCCGA -0.439525985334  
CAACCCGC -0.223862537765  
CAACCCGG -0.351789578983  
CAACCCTA -0.664938408246  
CAACCCTC -0.68779905803  
CAACCCTG -0.503171409972  
CAACCGAA -0.132990554506

CAACCGAC 0.18358467632  
CAACCGAG -0.569579981091  
CAACCGCA -0.0391965849568  
CAACCGCC -0.723141852008  
CAACCGCG 1.57449615726  
CAACCGGA 0.302038369856  
CAACCGGC -0.467392274924  
CAACCGGG -1.36079291366  
CAACCGTA 0.470308640407  
CAACCGTC -0.0939244971495  
CAACCGTG -0.223908336923  
CAACCTAA 1.37435112989  
CAACCTAC -0.21444747992  
CAACCTAG -0.686360339931  
CAACCTCA -0.18203520753  
CAACCTCC -1.24290192523  
CAACCTCG 0.215669068375  
CAACCTGA 0.660140738254  
CAACCTGC -0.634255886787  
CAACCTGG -0.807514102016  
CAACCTTA -1.20445374016  
CAACCTTC -0.305368801364  
CAACCTTG -0.195435416666  
CAACGAAA 0.555363714228  
CAACGAAC 0.105694048078  
CAACGAAG -0.528186285612  
CAACGACA -0.474727842812  
CAACGACC -0.429937931578  
CAACGACG -0.778849033472  
CAACGAGA 0.432326982209  
CAACGAGC -0.605364528767  
CAACGAGG 0.353176252584  
CAACGATA 1.21219921051  
CAACGATC 0.807518681932  
CAACGATG 0.256686586223  
CAACGCAA 1.79511320014  
CAACGCAC 0.178747244331  
CAACGCAG -0.177107842648  
CAACGCCA -0.786341983921  
CAACGCCC -0.35725633304  
CAACGCCG -0.584248410552  
CAACGCGA 0.0859414957084  
CAACGCGC 0.194647462968  
CAACGCGG 0.253609507331  
CAACGCTA -0.644720786243  
CAACGCTC -0.492525395663  
CAACGCTG -0.180640414986  
CAACGGAA 0.423227105844  
CAACGGAC 0.429784296221  
CAACGGAG -0.802294247056  
CAACGGCA -0.615373518422  
CAACGGCC -0.658946212938  
CAACGGCG -1.16156324492  
CAACGGGA 0.00967028406244



CAACGGGC -1.22634344779  
CAACGGGG -0.633830787328  
CAACGGTA -0.86102292389  
CAACGGTC -0.743515191148  
CAACGGTG -1.00964785374  
CAACGTAA 1.31151031319  
CAACGTAC -0.155689866346  
CAACGTAG 0.121616749938  
CAACGTCA 0.636649100978  
CAACGTCC -0.439942757673  
CAACGTCCG -0.785958936417  
CAACGTGA 0.257859669206  
CAACGTGC -0.819661287821  
CAACGTGG -1.07537630736  
CAACGTTA 0.530813283687  
CAACGTTC 0.192346679806  
CAACGTTG 0.633345940786  
CAACTAAA 1.38090415671  
CAACTAAC 1.14950432658  
CAACTAAG -0.243932145216  
CAACTACA -0.407405162131  
CAACTACC 0.64618365299  
CAACTACG 1.62648590433  
CAACTAGA 0.143470650955  
CAACTAGC -0.424531965494  
CAACTAGG 0.0907118943842  
CAACTATA 1.48067054466  
CAACTATC 0.628657147883  
CAACTATG 1.17629475231  
CAACTCAA 0.619477747525  
CAACTCAC -0.23592686873  
CAACTCAG -0.0127654744405  
CAACTCCA -0.0578522474895  
CAACTCCC -1.13932317373  
CAACTCCG 0.0163613328881  
CAACTCGA -0.21623239802  
CAACTCGC 0.434353803135  
CAACTCGG -0.455110397958  
CAACTCTA -0.195124398747  
CAACTCTC -0.352001296  
CAACTCTG 0.168941852752  
CAACTGAA 0.388410585828  
CAACTGAC -0.0790816145315  
CAACTGAG -0.303873250673  
CAACTGCA -0.436136431276  
CAACTGCC -0.655160287984  
CAACTGCG -0.426561284556  
CAACTGGA 0.238213912145  
CAACTGGC -1.09939234499  
CAACTGGG -0.451497677093  
CAACTGTA -0.603797989381  
CAACTGTC -0.438543593392  
CAACTGTG 0.00853446494066  
CAACTTAA 0.247540702522

CAACTTAC 0.410933362732  
CAACTTAG -0.510478249297  
CAACTTCA 1.408198165  
CAACTTCC -0.714236622064  
CAACTTCG 0.509342013819  
CAACTTGA 0.0922571996153  
CAACTTGC -1.12369004745  
CAACTTGG 0.194002319373  
CAACTTTA -0.183889865256  
CAACTTTC -0.892385979204  
CAAGAAAA 0.0358345103936  
CAAGAAAC -0.59954428848  
CAAGAAAG -0.196725079324  
CAAGAACA 0.0353005338453  
CAAGAACC 0.0743586804378  
CAAGAACG -0.457511939268  
CAAGAAGA -0.265765436612  
CAAGAAGC 0.393465771997  
CAAGAAGG 0.416258555755  
CAAGAATA 0.657015570245  
CAAGAATC 6.18692458505  
CAAGAATG -0.476185088752  
CAAGACAA 0.0848333642595  
CAAGACAC -0.591424514098  
CAAGACAG 0.985013319288  
CAAGACCA 0.704324435175  
CAAGACCC -0.66106046862  
CAAGACCG -1.09715672154  
CAAGACGA -0.66316972803  
CAAGACGC -0.89154265016  
CAAGACGG -0.689187605233  
CAAGACTA 1.55778633441  
CAAGACTC -0.827099903815  
CAAGACTG -0.654718534286  
CAAGAGAA -0.293061318505  
CAAGAGAC -0.0756389750856  
CAAGAGAG -0.596096028228  
CAAGAGCA -0.366680134361  
CAAGAGCC -0.955801783517  
CAAGAGCG -0.337341610015  
CAAGAGGA -0.0944603472997  
CAAGAGGC -1.24921950274  
CAAGAGGG -0.926366664583  
CAAGAGTA 1.17608157805  
CAAGAGTC -0.67964077072  
CAAGAGTG -0.524506115078  
CAAGATAA 1.23865217972  
CAAGATAC 2.9061281224  
CAAGATAG 1.88243449957  
CAAGATCA 2.98133575269  
CAAGATCC 5.25064406815  
CAAGATCG 2.89767068331  
CAAGATGA 0.769567001364  
CAAGATGC -0.557807099314

CAAGATGG -0.998280502688  
CAAGATTA 3.5538089915  
CAAGATTC 6.59380388957  
CAAGATTG 4.26528642247  
CAAGCAAA 0.83148371596  
CAAGCAAC -0.978159683451  
CAAGCAAG 0.69011982628  
CAAGCACA -1.02129624508  
CAAGCACC 0.0326693722104  
CAAGCACG -0.38345386785  
CAAGCAGA 1.02223304604  
CAAGCAGC -0.672111389122  
CAAGCAGG 0.435786067716  
CAAGCATA -0.125855253846  
CAAGCATC 0.283209503234  
CAAGCATG -0.885287317871  
CAAGCCAA -1.03091781549  
CAAGCCAC -1.00259894694  
CAAGCCAG -1.09925099214  
CAAGCCCA -0.362513660038  
CAAGCCCC -0.44332627457  
CAAGCCCG -1.23705982626  
CAAGCCGA -0.753680314297  
CAAGCCGC -1.58577669809  
CAAGCCGG -1.29710543707  
CAAGCCTA -0.5648381028  
CAAGCCTC -1.38481623752  
CAAGCCTG -0.927304506435  
CAAGCGAA -0.467834028622  
CAAGCGAC -0.322891142911  
CAAGCGAG -0.647449375178  
CAAGCGCA 0.446695219006  
CAAGCGCC -0.932129447744  
CAAGCGCG 0.825598315962  
CAAGCGGA -1.19355270781  
CAAGCGGC -1.28188262961  
CAAGCGGG -0.494967531682  
CAAGCGTA -0.408272431644  
CAAGCGTC -0.510424955731  
CAAGCGTG -0.934376520985  
CAAGCTAA -0.3765871168  
CAAGCTAC -0.774742098056  
CAAGCTAG 0.174891996106  
CAAGCTCA 0.0571627619816  
CAAGCTCC -0.43364225076  
CAAGCTCG -0.673569051419  
CAAGCTGA -1.29884976046  
CAAGCTGC -1.17489746163  
CAAGCTGG -0.832777750356  
CAAGCTTA 0.121030312536  
CAAGCTTC -0.0520740591567  
CAAGCTTG 0.00503353565715  
CAAGGAAA -0.411315369346  
CAAGGAAC -0.459384500302

CAAGGAAG 0.15386310447  
CAAGGACA -0.620687053477  
CAAGGACC -0.601560908684  
CAAGGACG -0.514679281166  
CAAGGAGA 0.956494183517  
CAAGGAGC -1.42473894732  
CAAGGAGG -0.743179608226  
CAAGGATA 0.73266495423  
CAAGGATC 1.44057587984  
CAAGGATG -0.235413918159  
CAAGGCAA 0.700538718399  
CAAGGCAC -0.760288300104  
CAAGGCAG 0.419935187263  
CAAGGCCA -0.244158851049  
CAAGGCCC -1.03344343088  
CAAGGCCG -0.837333933878  
CAAGGCCG -0.0928621648587  
CAAGGCCG -0.986930430412  
CAAGGCCG -0.646188857439  
CAAGGCTA -1.01324308765  
CAAGGCTC -0.845738495752  
CAAGGCTG -0.975389042562  
CAAGGGAA 0.913776059655  
CAAGGGAC -0.660818773972  
CAAGGGAG -0.68996223554  
CAAGGGCA -0.514240025603  
CAAGGGCC -1.46644719974  
CAAGGGCG -1.0760087521  
CAAGGGGA 0.310340091802  
CAAGGGGC -1.27861506786  
CAAGGGGG -1.15594743542  
CAAGGGTA 0.0437148800849  
CAAGGGTC -0.453996645703  
CAAGGGTG -0.318927850308  
CAAGGTAA 0.743567235646  
CAAGGTAC -0.349570401593  
CAAGGTAG -0.316279618078  
CAAGGTCA -0.0957239877082  
CAAGGTCC -0.533807507739  
CAAGGTCC 1.02637120815  
CAAGGTGA -0.244325185264  
CAAGGTGC -1.39343501455  
CAAGGTGG -0.468323038724  
CAAGGTTA -1.12425858155  
CAAGGTTC -0.31314404117  
CAAGTAAA 0.845113961778  
CAAGTAAC 0.872505397369  
CAAGTAAG 0.242160134153  
CAAGTACA 1.61115526068  
CAAGTACC -0.854450744698  
CAAGTACG 0.2808062965  
CAAGTAGA 0.0306371386571  
CAAGTAGC -0.84602786316  
CAAGTAGG 0.0061404180381

CAAGTATA 1.47992235295  
CAAGTATC 2.20538434868  
CAAGTATG 0.835166176452  
CAAGTCAA 0.115323945611  
CAAGTCAC 0.318220669671  
CAAGTCAG -0.472324636077  
CAAGTCCA -0.0384767054621  
CAAGTCCC -0.324467466663  
CAAGTCCG -0.400728477587  
CAAGTCGA -0.916566477454  
CAAGTCGC -1.24015480846  
CAAGTCGG -0.503803646532  
CAAGTCTA -0.382143387394  
CAAGTCTC -0.566516850124  
CAAGTCTG -1.11846748618  
CAAGTGAA 0.0538652225958  
CAAGTGAC 0.44046757439  
CAAGTGAG 0.331789502981  
CAAGTGCA 0.233039439988  
CAAGTGCC -0.402692845115  
CAAGTGCG -0.306987801604  
CAAGTGGA 0.0348333824324  
CAAGTGGC -0.845956666287  
CAAGTGGG -0.569735281873  
CAAGTGTA -0.126470836167  
CAAGTGTC -0.805356545312  
CAAGTGTG -0.904276481546  
CAAGTTAA 0.208089307703  
CAAGTTAC 0.439346952261  
CAAGTTAG 0.208873306019  
CAAGTTCA 0.754091257652  
CAAGTTCC -0.0583689452645  
CAAGTTCG -0.395122244275  
CAAGTTGA 0.0395721380535  
CAAGTTGC -0.762499150374  
CAAGTTGG -0.653140545111  
CAAGTTTA -0.00607421743679  
CAAGTTTC 0.194569812577  
CAATAAAA 1.02276265085  
CAATAAAC 1.18370255796  
CAATAAAG 0.177392005607  
CAATAACA 0.100672794923  
CAATAACC -0.223165766028  
CAATAACG -0.215696131514  
CAATAAGA 0.719693799934  
CAATAAGC 1.68679527665  
CAATAAGG 0.651817365796  
CAATAATA 1.00375079577  
CAATAATC 2.93357472516  
CAATAATG 1.97507058313  
CAATACAA 0.408094647639  
CAATACAC 1.02537861549  
CAATACAG 1.32192878895  
CAATACCA 1.84727011413

CAATACCC 0.329056125952  
CAATACCG -0.209974567594  
CAATACGA 0.127585629312  
CAATACGC -0.211750742218  
CAATACGG 0.360145219029  
CAATACTA 0.241499793563  
CAATACTC 0.414367883236  
CAATACTG 1.39651854696  
CAATAGAA 0.0661818652865  
CAATAGAC 0.180990778546  
CAATAGAG 0.00382756055223  
CAATAGCA 0.859972041389  
CAATAGCC -0.537207054341  
CAATAGCG 0.444882196878  
CAATAGGA -0.291605321632  
CAATAGGC -0.824291166353  
CAATAGGG -0.292932872684  
CAATAGTA 0.917184349732  
CAATAGTC 0.596834435564  
CAATAGTG 0.385971156124  
CAATATAA 1.7068365719  
CAATATAC 1.11134550891  
CAATATAG 2.98920321534  
CAATATCA 3.69336776982  
CAATATCC 6.62868536112  
CAATATCG 3.06051791719  
CAATATGA 1.2790630669  
CAATATGC -0.513393990246  
CAATATGG 0.785396439484  
CAATATTA 1.22199231959  
CAATATTC 1.68676259271  
CAATATTG 2.29344884354  
CAATCAAA 1.74622405607  
CAATCAAC 1.3525045151  
CAATCAAG 0.973412808888  
CAATCACA 1.4113366564  
CAATCACC 1.23287919583  
CAATCACG 0.913037027785  
CAATCAGA 1.40877252808  
CAATCAGC 1.46800874286  
CAATCAGG 1.67551848303  
CAATCATA 2.73230699388  
CAATCATC 0.534711000222  
CAATCATG 0.240228242391  
CAATCCAA 1.96781162475  
CAATCCAC 2.29830209706  
CAATCCAG 2.15258791189  
CAATCCCA 2.48366919334  
CAATCCCC 1.44670588898  
CAATCCCG 3.14930041795  
CAATCCGA 3.95305128641  
CAATCCGC 1.55407389629  
CAATCCGG 2.35719356908  
CAATCCTA 1.71690343503

CAATCCTC 3.2909615858  
CAATCCTG 4.39102010037  
CAATCGAA 1.46732029824  
CAATCGAC 1.22702189986  
CAATCGAG 0.85433333231  
CAATCGCA 1.51216121308  
CAATCGCC 1.48231140358  
CAATCGCG 1.35631708684  
CAATCGGA 3.08414695194  
CAATCGGC -0.518093400227  
CAATCGGG 1.53431260044  
CAATCGTA 2.38165781394  
CAATCGTC 2.00463851963  
CAATCGTG 1.24107911874  
CAATCTAA 4.23677894466  
CAATCTAC 3.53412784418  
CAATCTAG 4.97108475782  
CAATCTCA 4.39272882532  
CAATCTCC 4.63536027445  
CAATCTCG 4.8325154495  
CAATCTGA 5.6773369212  
CAATCTGC 1.82721383007  
CAATCTGG 5.86271796541  
CAATCTTA 2.89513153635  
CAATCTTC 4.1117751388  
CAATGAAA 0.0985610373768  
CAATGAAC -0.690322591643  
CAATGAAG 0.612385123353  
CAATGACA 0.0635875511561  
CAATGACC -0.21245438383  
CAATGACG -0.47573958785  
CAATGAGA -0.467564438123  
CAATGAGC -0.873124726894  
CAATGAGG -0.0755596592709  
CAATGATA 1.45876897088  
CAATGATC 1.7616675322  
CAATGATG 0.972231190608  
CAATGCAA 1.51964916726  
CAATGCAC 0.152279286311  
CAATGCAG 1.99672671506  
CAATGCCA -0.122253358237  
CAATGCCC -0.449837457611  
CAATGCCG -0.553816743573  
CAATGCGA -0.221527613412  
CAATGCGC -1.28044162156  
CAATGCGG 0.028601366078  
CAATGCTA 0.083025130225  
CAATGCTC -0.33914359871  
CAATGCTG -0.141835829188  
CAATGGAA 0.306770463781  
CAATGGAC 0.109047795522  
CAATGGAG 0.263507538116  
CAATGGCA -0.0274520153868  
CAATGGCC -0.189111593818

CAATGGCG -0.237961600419  
CAATGGGA 0.200733130195  
CAATGGGC -1.28365130983  
CAATGGGG 0.660267310472  
CAATGGTA -0.453613181843  
CAATGGTC 0.530245374126  
CAATGGTG 0.41917471306  
CAATGTAA 0.939641134213  
CAATGTAC 0.748336177076  
CAATGTAG 0.152585932492  
CAATGTCA 0.78381199679  
CAATGTCC -0.21435837974  
CAATGTCCG -0.340159923664  
CAATGTGA 0.841863470618  
CAATGTGC -0.855850949869  
CAATGTGG 0.0715903295064  
CAATGTTA 0.998116042075  
CAATGTTC -0.559557251689  
CAATTAAC 0.564614519637  
CAATTAAG 1.5960282151  
CAATTACA 1.90509404942  
CAATTACC 0.263114914424  
CAATTACG 1.69968919691  
CAATTAGA 1.16114189266  
CAATTAGC -0.120779458057  
CAATTAGG 1.02946223497  
CAATTATA 1.40510942814  
CAATTATC 0.95552782128  
CAATTATG 1.09174367741  
CAATTCAC 1.54850700862  
CAATTCAG 1.85443122886  
CAATTCBA 0.911423231995  
CAATTCBC 2.5563818104  
CAATTCBG 0.405340869167  
CAATTCGA -0.28847016108  
CAATTCGC 0.105876203821  
CAATTCGG 0.177885179268  
CAATTCTA 0.746279170342  
CAATTCTC 0.792901672435  
CAATTCTG 1.53015778409  
CAATTGAA 0.722706135471  
CAATTGAC 1.66749863408  
CAATTGAG 0.893958972108  
CAATTGCA 0.834378014577  
CAATTGCC 0.722706135471  
CAATTGCG 0.257466629158  
CAATTGGA 0.778650223491  
CAATTGGC -0.375506673024  
CAATTGGG 0.395985350228  
CAATTGTA 0.124459212235  
CAATTGTC 0.667774625203  
CAATTGTG 1.40379207781



CAATTTAA 0.786958607132  
CAATTTAC 1.81119411727  
CAATTTAG 0.775017517538  
CAATTTCA 1.71507646498  
CAATTTCC 1.85586182802  
CAATTTCCG 3.80596104472  
CAATTTGA 1.52448077026  
CAATTTGC 0.214133339331  
CAATTTGG 0.0954995718334  
CAATTTTA 0.58018560887  
CAATTTTC 1.45474613937  
CACAAAAA 0.675821537287  
CACAAAAC 1.09762928558  
CACAAAAG 1.12358450121  
CACAAACA 0.908621572585  
CACAAACC 0.124760653966  
CACAAACG -0.389854092022  
CACAAAGA 1.4119684766  
CACAAAGC -0.625297987812  
CACAAAGG 0.183575516489  
CACAAATA 2.83619530606  
CACAAATC 3.16618781662  
CACAAATG -0.447503574148  
CACAAACA 0.782802749888  
CACAAACAC 0.177597477284  
CACAAACAG 0.704352539204  
CACAAACCA 0.255685041906  
CACAAACCC -0.235783434094  
CACAAACCG 0.0519204237989  
CACAAACGA 0.524959943099  
CACAAACGC -0.554882614889  
CACAAACGG -1.04562683966  
CACAAACTA 0.868300410118  
CACAAACTC 0.478052861692  
CACAAACTG 0.268321862348  
CACAAAGAA -0.259908140642  
CACAAAGAC 0.537736034617  
CACAAAGAG -0.0821678532559  
CACAAAGCA -0.105852679708  
CACAAAGCC -1.02129624508  
CACAAAGCG -0.354393885657  
CACAAAGGA 0.00790264473638  
CACAAAGGC -1.04802963004  
CACAAAGGG -1.09274376448  
CACAAAGTA 1.74961215288  
CACAAAGTC 0.762927997036  
CACAAAGTG -0.246986949064  
CACAAATA 1.57470246165  
CACAAATAC 2.00585240549  
CACAAATAG 0.860903013367  
CACAAATCA 5.60225877762  
CACAAATCC 6.4804470178  
CACAAATCG 3.7757633698  
CACAAATGA 0.640110684621

CACAATGC 0.549742283923  
CACAATGG -0.836259319086  
CACAATTA 1.23212267701  
CACAATTC 1.44817520925  
CACACAAA 1.12358450121  
CACACAAC 0.993919590121  
CACACAAG 0.0752909014838  
CACACACA 0.515851739614  
CACACACC -0.766996835881  
CACACACG -0.926037327  
CACACAGA 1.57536405131  
CACACAGC 0.635929637839  
CACACAGG -0.0454360957188  
CACACATA 1.20817013366  
CACACATC 0.104920875018  
CACACATG 0.145271390582  
CACACCAA -0.918214830791  
CACACCAC -0.486005260969  
CACACCAG -0.334580961669  
CACACCCA -0.0883653120637  
CACACCCC -1.13192827511  
CACACCCG -0.536308558129  
CACACCGA -0.608309830991  
CACACCGC -1.52085181151  
CACACCGG -0.535186478755  
CACACCTA -0.822216672667  
CACACCTC 0.761039198119  
CACACCTG -0.245839263797  
CACACGAA -0.118912517829  
CACACGAC -1.05657825108  
CACACGAG -0.374782421791  
CACACGCA 0.856438428161  
CACACGCC -0.607655527564  
CACACGCG -0.518045311111  
CACACGGA 1.13576083194  
CACACGGC -1.53978268535  
CACACGGG -1.20128464659  
CACACGTA 1.26113561098  
CACACGTC 0.705381563016  
CACACGTG -0.222798956407  
CACACTAA -0.382585765626  
CACACTAC 0.265340545331  
CACACTAG 0.138765620169  
CACACTCA 0.866296280593  
CACACTCC 0.592826592871  
CACACTCG -0.782257739906  
CACACTGA 1.06077303761  
CACACTGC -1.19992274617  
CACACTGG -0.929589676248  
CACACTTA -0.53786114959  
CACACTTC 1.13532990349  
CACAGAAA 0.716750163134  
CACAGAAC 0.15882273694  
CACAGAAG -0.0697754337763

CACAGACA -0.0784631177187  
CACAGACC -0.428329548416  
CACAGACG -0.549053214771  
CACAGAGA 2.37696922921  
CACAGAGC -1.42755642825  
CACAGAGG -1.11279234595  
CACAGATA 2.27317834433  
CACAGATC 3.23121845761  
CACAGATG -0.923289793868  
CACAGCAA 0.918116362601  
CACAGCAC 0.37469956695  
CACAGCAG 0.499036786882  
CACAGCCA 0.146775892927  
CACAGCCC -1.21734870131  
CACAGCCG -0.697004480637  
CACAGCGA 0.336100452829  
CACAGCGC 0.186251228214  
CACAGCGG -0.951867635833  
CACAGCTA -0.0830651003994  
CACAGCTC -0.532414588798  
CACAGCTG -0.724728376481  
CACAGGAA -0.0421364745531  
CACAGGAC -0.0824792875313  
CACAGGAG 1.48362125951  
CACAGGCA -0.571274966298  
CACAGGCC -0.662447766756  
CACAGGCG -1.6175833807  
CACAGGGA -0.0836827645003  
CACAGGGC -1.16087334305  
CACAGGGG -0.123183497503  
CACAGGTA 0.234479823511  
CACAGGTC -0.966692198788  
CACAGGTG -0.854313347223  
CACAGTAA 0.690670040711  
CACAGTAC 0.448674367172  
CACAGTAG 0.0255009712502  
CACAGTCA -0.602009948611  
CACAGTCC -0.101303574237  
CACAGTCG -0.763979920428  
CACAGTGA -0.856383469171  
CACAGTGC -0.980151530474  
CACAGTGG -0.94929330679  
CACAGTTA 0.275568538233  
CACAGTTC -0.0853396531348  
CACATAAA 0.333410793179  
CACATAAC 0.614858694248  
CACATAAG 0.63418510627  
CACATACA 2.83701469464  
CACATACC -0.0750196455609  
CACATACG 0.376766566228  
CACATAGA 2.57287096458  
CACATAGC -0.789713218316  
CACATAGG -0.120256098586  
CACATATA 4.19808615045

CACATATC 2.62866537262  
CACATATG 0.83779192546  
CACATCAA -0.369153913434  
CACATCAC 0.417747028395  
CACATCAG 1.45491205723  
CACATCCA -0.166794288592  
CACATCCC -0.13557716605  
CACATCCG 0.103964505325  
CACATCGA 0.574405546935  
CACATCGC -0.600573936826  
CACATCGG -0.769742703589  
CACATCTA 0.549164798174  
CACATCTC 0.0170123054676  
CACATCTG -0.294632854163  
CACATGAA 1.14891310109  
CACATGAC 2.07731158287  
CACATGAG 0.541680383023  
CACATGCA 0.300588201967  
CACATGCC -0.19323768161  
CACATGCG -0.789390958785  
CACATGGA 0.110535643627  
CACATGGC -0.654679396824  
CACATGGG -1.50390341669  
CACATGTA 1.14095112562  
CACATGTC -1.02121526384  
CACATGTG -0.489406264816  
CACATTAA 0.516708183871  
CACATTAC 0.692387300963  
CACATTAG 0.403881125091  
CACATTCA 1.72461705415  
CACATTCC 0.726350083035  
CACATTCT 0.468033671316  
CACATTGA 0.321396424932  
CACATTGC 0.119202301593  
CACATTGG -0.590924054207  
CACATTTA 0.375034941695  
CACATTTT 1.063813269  
CACCAAAA 0.485446303061  
CACCAAAC -0.249138676785  
CACCAAAG -0.0461303693206  
CACCAACA -0.265088858139  
CACCAACC -0.61913716833  
CACCAACG -1.55258854632  
CACCAAGA 1.84772789754  
CACCAAGC -0.653707621959  
CACCAAGG -0.444138585092  
CACCAATA 0.842460941454  
CACCAATC 1.32349616105  
CACCAATG -0.587447065392  
CACCACAA 1.07915619515  
CACCACAC -0.0645093633026  
CACCAACG -0.220085772643  
CACCAACA 0.367435404114  
CACCAACC -0.163871677769

CACCACCG -0.362083147952  
CACCACGA 1.20911234725  
CACCACGC -0.703294786829  
CACCACGG -1.13455652226  
CACCACTA 1.17476839128  
CACCACTC -0.149822786011  
CACCACTG -0.941310097171  
CACCAGAA -0.816295257876  
CACCAGAC -0.715928692779  
CACCAGAG -0.825428026365  
CACCAGCA -0.575480578083  
CACCAGCC -0.625318805611  
CACCAGCG -1.12437412033  
CACCAGGA 0.344389684096  
CACCAGGC -1.32142374915  
CACCAGGG -1.44239556367  
CACCAGTA 0.53117780335  
CACCAGTC -0.23729813716  
CACCAGTG -0.54425845927  
CACCATAA 0.252037138961  
CACCATAC 0.852014437663  
CACCATAG 0.281623603294  
CACCATCA 0.256546690613  
CACCATCC -0.908471684431  
CACCATCG -0.68139862568  
CACCATGA -0.358871794255  
CACCATGC -0.820921389204  
CACCATGG -0.954474232465  
CACCATTA 0.546720580376  
CACCATTC -0.201450511553  
CACCCAAA 0.284966525482  
CACCCAAC -0.665415135847  
CACCCAAG -0.471641395909  
CACCCACA -0.484592773296  
CACCCACC -0.548605840267  
CACCCACG -0.359906022517  
CACCCAGA 1.19167286055  
CACCCAGC -0.727587493017  
CACCCAGG -0.370721285532  
CACCCATA 0.828581298402  
CACCCATC 1.04486532456  
CACCCATG -1.32710346929  
CACCCCAA -0.443019212032  
CACCCCAC -0.273017316947  
CACCCCAG 0.053195722175  
CACCCCCA -0.850258039948  
CACCCCCC -1.5476568097  
CACCCCCG -1.06647086924  
CACCCCGA 0.184544376861  
CACCCCGC -0.34993346401  
CACCCCGG -1.29146839341  
CACCCCTA -0.0759112718986  
CACCCCTC -0.0851125309461  
CACCCCTG -0.372362977174

CACCCGAA -0.567169904483  
CACCCGAC -0.208798153764  
CACCCGAG -0.892883316425  
CACCCGCA -0.584974327209  
CACCCGCC -0.907984964287  
CACCCGCG -0.867147312223  
CACCCGGA -0.52843526649  
CACCCGGC -1.47373613576  
CACCCGGG -1.31407777236  
CACCCGTA -0.31367468687  
CACCCGTC -1.35021955347  
CACCCGTG -1.18727447594  
CACCCCTAA -0.686597246485  
CACCCCTAC -0.938115814069  
CACCCCTAG 0.407651644873  
CACCCCTCA -0.338325042847  
CACCCCTCC -0.122070994316  
CACCCCTCG -0.28275900606  
CACCCCTGA -0.739625593555  
CACCCCTGC -1.02834973178  
CACCCCTGG -1.40207002946  
CACCCCTTA 0.147940856967  
CACCCCTTC -0.541285053017  
CACCGAAA 0.541970166787  
CACCGAAC -0.53677695861  
CACCGAAG -0.456072388457  
CACCGACA -0.579009611395  
CACCGACC -0.647028855635  
CACCGACG -0.775397650551  
CACCGAGA 0.404938252932  
CACCGAGC -1.47351921429  
CACCGAGG -0.680645437707  
CACCGATA 3.81823334549  
CACCGATC 1.65617770673  
CACCGATG -0.905306962604  
CACCGCAA 0.221654601987  
CACCGCAC -0.0857212433933  
CACCGCAG 0.692289873663  
CACCGCCA -0.561809529379  
CACCGCCC -0.748312236607  
CACCGCCG -0.945450549244  
CACCGCGA 0.302355633115  
CACCGCGC -0.210325139332  
CACCGCGG -1.07456691133  
CACCGCTA -0.0596536116502  
CACCGCTC -0.699277784305  
CACCGCTG -1.39224111377  
CACCGGAA 0.134322477295  
CACCGGAC -0.329997923186  
CACCGGAG 0.178323602119  
CACCGGCA -1.02766878157  
CACCGGCC -0.704482858627  
CACCGGCG -1.24635538994  
CACCGGGA -0.326156414708

CACCGGGC -1.22562752368  
CACCGGGG -1.17285044744  
CACCGGTA 0.217986505776  
CACCGGTC -1.34823270272  
CACCGGTG -0.902201779682  
CACCGTAA 0.507877481648  
CACCGTAC -0.799891664856  
CACCGTAG 0.161330865382  
CACCGTCA 0.00975168165713  
CACCGTCC -0.175321259125  
CACCGTCG -0.982574722295  
CACCGTGA 0.198177328993  
CACCGTGC -0.31687230082  
CACCGTGG -1.30650966966  
CACCGTTA -0.250295313705  
CACCGTTC -0.126249126606  
CACCTAAA -0.22959388605  
CACCTAAC -0.0261386204382  
CACCTAAG -0.867768723528  
CACCTACA 0.608579213312  
CACCTACC 0.400346262795  
CACCTACG 0.0998617334678  
CACCTAGA 0.743827458136  
CACCTAGC -0.943421854717  
CACCTAGG -1.14252557577  
CACCTATA 0.617198198517  
CACCTATC 0.892717398566  
CACCTATG -0.236172102404  
CACCTCAA -0.584130373631  
CACCTCAC 0.003710356343  
CACCTCAG -0.154411237122  
CACCTCCA -0.284417351941  
CACCTCCC -0.445196962001  
CACCTCCG -0.698800640348  
CACCTCGA 0.394163168268  
CACCTCGC -0.394775211563  
CACCTCGG -0.931212423692  
CACCTCTA 0.112871192514  
CACCTCTC -0.466590165123  
CACCTCTG -1.00005709367  
CACCTGAA -0.671536817866  
CACCTGAC -0.522025049775  
CACCTGAG -0.526441337687  
CACCTGCA -0.481172825251  
CACCTGCC -0.462338546002  
CACCTGCG -0.567534840502  
CACCTGGA -0.491992876361  
CACCTGGC -1.01147690557  
CACCTGGG -1.26746880184  
CACCTGTA 0.806351636111  
CACCTGTC -1.4933215212  
CACCTTAA -0.466886194227  
CACCTTAC 0.765065776831  
CACCTTAG -0.204979544866

CACCTTCA -0.481447828378  
CACCTTCC -0.646097467301  
CACCTTCG -0.553962884523  
CACCTTGA 0.0776485172379  
CACCTTGC -0.618077958709  
CACCTTGG -1.17900522976  
CACCTTTA 0.55148910545  
CACCTTTC -0.786601790055  
CACGAAAA -0.0957135788087  
CACGAAAC 1.01856432529  
CACGAAAG -0.000796280817593  
CACGAACA -0.776876130647  
CACGAACC -1.05551508608  
CACGAACG -0.301285598238  
CACGAAGA 2.022773529  
CACGAAGC -0.464627046663  
CACGAAGG -0.646083519376  
CACGAATA 0.357114772006  
CACGAATC 5.64137042596  
CACGAATG 0.34138442661  
CACGACAA 0.324063601359  
CACGACAC 0.442956134101  
CACGACAG -1.23715267364  
CACGACCA -0.489735394221  
CACGACCC -1.04776857483  
CACGACCG 0.700541424713  
CACGACGA -0.820207963227  
CACGACGC -1.08607561523  
CACGACGG -0.453076915337  
CACGACTA 0.404485257622  
CACGACTC -0.0912602352139  
CACGACTG -0.531158650975  
CACGAGAA -0.875601836815  
CACGAGAC 0.235678720564  
CACGAGAG -0.31687230082  
CACGAGCA -0.441937102832  
CACGAGCC -1.37786496621  
CACGAGCG -0.386282174043  
CACGAGGA 0.459293318342  
CACGAGGC -0.565019425831  
CACGAGGG -1.21083855916  
CACGAGTA 0.173721619438  
CACGAGTC -0.528714224998  
CACGAGTG -0.76789762205  
CACGATAA 1.14669683819  
CACGATAC 2.84519942055  
CACGATAG 1.26866998885  
CACGATCA 1.48306584063  
CACGATCC 3.54861182794  
CACGATCG 3.06489465128  
CACGATGA -0.906505235123  
CACGATGC 0.668101672828  
CACGATGG -0.49791970378  
CACGATTA 1.95381061393



CACGATTC 5.2078984648  
CACGCAAA 0.277477530415  
CACGCAAC 0.909943086475  
CACGCAAG -0.0343601938576  
CACGCACA -0.399416123529  
CACGCACC -1.27196440556  
CACGCACG -0.319993721625  
CACGCAGA 0.489844895844  
CACGCAGC -0.530170221871  
CACGCAGG -0.779082192823  
CACGCATA -0.0135178297019  
CACGCATC -0.285012324641  
CACGCATG -0.641601447218  
CACGCCAA -0.539432060714  
CACGCCAC -0.129777743562  
CACGCCAG -0.806322074836  
CACGCCCA -0.984050704255  
CACGCCCC -1.28620315565  
CACGCCCG -0.542860335879  
CACGCCGA 0.603525900746  
CACGCCGC -1.23351372235  
CACGCCGG -0.954451124708  
CACGCCTA -0.748073872807  
CACGCCTC -1.29051806088  
CACGCCTG -0.991436026683  
CACGCGAA 0.471444875885  
CACGCGAC -1.13315361077  
CACGCGAG 0.0656947287864  
CACGCGCA -0.232221716837  
CACGCGCC -0.905923169459  
CACGCGCG 1.33307338955  
CACGCGGA 0.384069450171  
CACGCGGC -1.00170607154  
CACGCGGG -1.07924508715  
CACGCGTA 0.901732130133  
CACGCGTC 0.174053246978  
CACGCGTG 0.741403849958  
CACGCTAA 0.0201166556773  
CACGCTAC -0.46743307781  
CACGCTAG -0.498497605884  
CACGCTCA -0.746164464269  
CACGCTCC -0.429627954549  
CACGCTCG 0.268715943286  
CACGCTGA 0.659129825927  
CACGCTGC 0.259386654773  
CACGCTGG -0.836998767312  
CACGCTTA -0.138783523476  
CACGCTTC -0.793308035874  
CACGAAA 0.376360410967  
CACGGAAC 0.49885046758  
CACGGAAG -0.0761381859093  
CACGGACA 0.0660307280647  
CACGGACC -1.04349426431  
CACGGACG 0.615216760394

CACGGAGA 0.824191657273  
CACGGAGC -0.221270721771  
CACGGAGG -0.543148870575  
CACGGATA 1.51222491554  
CACGGATC 1.38710994264  
CACGGATG -0.0933644983523  
CACGGCAA 0.249552950988  
CACGGCAC 0.816495316926  
CACGGCAG -0.611733318062  
CACGGCCA -1.02026659673  
CACGGCCC -1.10060290002  
CACGGCCG -0.253655098311  
CACGGCGA -0.655285194779  
CACGGCGC -0.609208951736  
CACGGCGG -0.931946875646  
CACGGCTA -0.418174625989  
CACGGCTC -0.734415731139  
CACGGCTG -0.894766910893  
CACGGGAA 0.822009535566  
CACGGGAC -0.824254110671  
CACGGGAG 0.216893987677  
CACGGGCA -1.51718662979  
CACGGGCC -1.02254219035  
CACGGGCG -1.47078771086  
CACGGGGA -0.803712147357  
CACGGGGC -1.50250258698  
CACGGGGG -1.31800359292  
CACGGGTA -1.18778201388  
CACGGGTC -1.02834973178  
CACGGTAA 0.0565253209715  
CACGGTAC 0.163519648785  
CACGGTAG -0.566341564255  
CACGGTCA -1.26647704188  
CACGGTCC -0.967286546953  
CACGGTCG -0.12845539696  
CACGGTGA -0.564072007791  
CACGGTGC -1.33398791547  
CACGGTGG -0.891182502235  
CACGGTTA 0.329967529199  
CACGGTTC 0.305040088315  
CACGTAAA 1.34027447446  
CACGTAAAC 0.75886561171  
CACGTAAAG 1.10708410543  
CACGTACA 0.451525364766  
CACGTACC -0.503653133844  
CACGTACG -0.439589895978  
CACGTAGA 0.605658059735  
CACGTAGC -0.524414100405  
CACGTAGG -0.155891798998  
CACGTATA 2.33048724726  
CACGTATC 2.07616035857  
CACGTATG -0.639383727074  
CACGTCAA 0.245464959768  
CACGTCAC 1.80868453158

CACGTCAG -0.479529468186  
CACGTCCA 0.537569075868  
CACGTCCC -1.06415218277  
CACGTCCG -0.551454339725  
CACGTCGA 0.0715903295064  
CACGTCGC -0.564414252409  
CACGTCGG -0.716440394282  
CACGTCTA -0.321780305148  
CACGTCTC -0.563878818615  
CACGTCTG -0.428202143485  
CACGTGAA 0.955915032344  
CACGTGAC -0.182499652629  
CACGTGAG 0.496982902818  
CACGTGCA -0.50522800035  
CACGTGCC -0.640422951608  
CACGTGCG -0.366705948432  
CACGTGGA 0.298807031071  
CACGTGGC 0.235999106493  
CACGTGGG -0.168397467305  
CACGTGTA -0.218983262  
CACGTGTC -0.684054560496  
CACGTTAA -0.0958114224647  
CACGTTAC -0.354312279884  
CACGTTAG -0.164575943914  
CACGTTCA -0.909377050516  
CACGTTCC 0.207556372045  
CACGTTCCG -0.422699582813  
CACGTTGA -0.269032165655  
CACGTTGC 0.109677742124  
CACGTTGG -1.1818889113  
CACGTTTA -0.211137866211  
CACGTTTC -0.963415685379  
CACTAAAA 0.198022236389  
CACTAAAC 0.787891244534  
CACTAAAG -0.156365820284  
CACTAACA 0.0665942658877  
CACTAACC -0.480996498492  
CACTAACG -0.502760050261  
CACTAAGA 1.50263040827  
CACTAAGC -0.102767065518  
CACTAAGG -0.413203335551  
CACTAATA 1.01215056955  
CACTAATC 0.807767870987  
CACTAATG 0.175465110117  
CACTACAA 0.929420635718  
CACTACAC 1.57920764156  
CACTACAG -0.558208466482  
CACTACCA 0.0412431827915  
CACTACCC -1.02563758891  
CACTACCG 0.198697149437  
CACTACGA 0.429784296221  
CACTACGC -0.804744085661  
CACTACGG -0.620561938504  
CACTACTA 0.30926131345

CACTACTC 0.477243882017  
CACTACTG 0.607626174467  
CACTAGAA 0.401337190034  
CACTAGAC 0.507186122539  
CACTAGAG 0.286791413756  
CACTAGCA -0.910409821532  
CACTAGCC -0.866628116312  
CACTAGCG -0.952838577985  
CACTAGGA 1.0858489094  
CACTAGGC -1.06903333213  
CACTAGGG -1.23707356601  
CACTAGTA 0.932160466265  
CACTAGTC -1.03140307839  
CACTAGTG 1.25606023154  
CACTATAA 0.958967338056  
CACTATAC 1.24233672199  
CACTATAG 0.612335993347  
CACTATCA 0.949508771011  
CACTATCC 0.639509258403  
CACTATCG 1.50501696076  
CACTATGA 0.844204223955  
CACTATGC 0.816663108387  
CACTATGG -0.28118247413  
CACTATTA 0.641424287747  
CACTATTC -0.150319498698  
CACTCAAA -0.145459791664  
CACTCAAC 0.465045484426  
CACTCAAG -0.131189190345  
CACTCACA -0.540050141171  
CACTCACC -0.516649894033  
CACTCACG -0.801694694441  
CACTCAGA 1.41415934179  
CACTCAGC -1.02995353503  
CACTCAGG -1.41058617474  
CACTCATA 0.207564699165  
CACTCATC 0.290860877135  
CACTCATG -0.156723053718  
CACTCCAA -0.363101554687  
CACTCCAC -0.358441282168  
CACTCCAG -0.852090838986  
CACTCCCA -0.327537259326  
CACTCCCC -1.09160898625  
CACTCCCG -0.855859276988  
CACTCCGA 0.575962510133  
CACTCCGC -1.28024135433  
CACTCCGG -1.28730441723  
CACTCCTA -1.27247569071  
CACTCCTC -0.213389519367  
CACTCCTG 0.524334992769  
CACTCGAA -0.367954600025  
CACTCGAC -0.590580976877  
CACTCGAG -0.918940122913  
CACTCGCA 1.18467766367  
CACTCGCC -0.756246940754

CACTCGCG 0.0400382485765  
CACTCGGA 0.430116756473  
CACTCGGC -0.644355850224  
CACTCGGG -0.892883316425  
CACTCGTA 0.363458371764  
CACTCGTC -0.839882032495  
CACTCTAA 0.217325332475  
CACTCTAC 0.492804770528  
CACTCTAG 0.174836412583  
CACTCTCA -0.340443878445  
CACTCTCC -0.988352494272  
CACTCTCG -1.12890511432  
CACTCTGA 0.757257020369  
CACTCTGC -0.219048421711  
CACTCTGG -0.47922844281  
CACTCTTA -0.0703633284244  
CACTCTTC -0.438522775593  
CACTGAAA 1.31799942936  
CACTGAAC 0.261498828676  
CACTGAAG 0.330585401478  
CACTGACA -0.119027848436  
CACTGACC -0.574770274776  
CACTGACG -0.177486310237  
CACTGAGA 1.30230010249  
CACTGAGC -0.372815972483  
CACTGAGG -0.769336756506  
CACTGATA 3.90799365828  
CACTGATC 1.48306584063  
CACTGATG 0.546045459149  
CACTGCAA -0.572798204662  
CACTGCAC -0.0459935963802  
CACTGCAG -0.610790479938  
CACTGCCA -0.741634094817  
CACTGCCC -1.50612738217  
CACTGCCG -0.448846322193  
CACTGCGA 0.656942083414  
CACTGCGC 0.348639013259  
CACTGCGG -1.11071077422  
CACTGCTA -0.251471519358  
CACTGCTC -0.774818499378  
CACTGCTG 0.0862352348544  
CACTGGAA 0.14084573466  
CACTGGAC 0.304692222892  
CACTGGAG 0.414290024667  
CACTGGCA -0.97665372386  
CACTGGCC -1.36311784547  
CACTGGCG -1.52440915703  
CACTGGGA -0.459080144078  
CACTGGGC -1.29529886846  
CACTGGGG -0.705713815091  
CACTGGTA -0.376691830329  
CACTGGTC -0.802955836713  
CACTGTAA 0.304303762759  
CACTGTAC -0.370593256068

CACTGTAG -0.317378173339  
CACTGTCA -0.2061597059  
CACTGTCC 0.0345912714282  
CACTGTCCG 0.0478497113526  
CACTGTGA -0.406096971633  
CACTGTGC -1.16752525442  
CACTGTGG -1.16307045358  
CACTGTTA 1.06077303761  
CACTGTTC -0.116651496663  
CACTTAAA -0.489205373054  
CACTTAAC 1.12632828714  
CACTTAAG 0.508184960542  
CACTTACA 1.26906427796  
CACTTACC -0.621793935858  
CACTTACG 0.78446817382  
CACTTAGA 0.678865099524  
CACTTAGC -0.621733980597  
CACTTAGG -1.03222225878  
CACTTATA 1.11067288582  
CACTTATC -0.239201924893  
CACTTATG 0.509592660121  
CACTTCAA 0.209291535604  
CACTTCAC 2.02088618733  
CACTTCAG -0.308620541592  
CACTTCCA 0.489718115447  
CACTTCCC -0.397883308977  
CACTTCCG 0.0234071170114  
CACTTCGA 1.18291189795  
CACTTCGC -0.47205796007  
CACTTCGG 0.325533754335  
CACTTCTA -0.536454699079  
CACTTCTC -0.534598167751  
CACTTCTG 0.571458162931  
CACTTGAA 0.114540571828  
CACTTGAC -0.165387213547  
CACTTGAG 0.0538652225958  
CACTTGCA -0.449449205656  
CACTTGCC -1.12791626886  
CACTTGCG -0.0280673895297  
CACTTGGA 0.778877762035  
CACTTGGC -0.626330758828  
CACTTGGG -0.793730220841  
CACTTGTA 0.406015782216  
CACTTGTC -0.569735281873  
CACTTTAA -0.163168244335  
CACTTTAC 0.184369090993  
CACTTTAG 0.360436876395  
CACTTTCA 0.612687814153  
CACTTTCC 0.123257192512  
CACTTTCG -0.336162906227  
CACTTTGA 0.0216700798501  
CACTTTGC -0.607539156066  
CACTTTGG -0.302219484708  
CACTTTTA 0.539283421628

CACTTTTC 0.0476467378109  
CAGAAAAA 0.810738779105  
CAGAAAAC 0.461401536862  
CAGAAAAG 0.440003545647  
CAGAAACA 0.930159251232  
CAGAAACC -0.622370588895  
CAGAAACG -0.521697793972  
CAGAAAGA 1.26900640448  
CAGAAAGC -0.962882957899  
CAGAAAGG -0.959318950684  
CAGAAATA 1.76690695589  
CAGAAATC 9.23466786796  
CAGAAATG 1.23694449565  
CAGAACAA -0.0142712258532  
CAGAACAC -1.03300209354  
CAGAACAG -0.0709966058746  
CAGAACCA -0.826856543743  
CAGAACCC -0.591261302553  
CAGAACCG -0.821735781507  
CAGAACGA -0.646897495323  
CAGAACGC -0.73763291382  
CAGAACGG 0.6399283207  
CAGAACTA 1.42491319229  
CAGAACTC -0.219556167833  
CAGAACTG 1.56656457578  
CAGAAGAA -0.754543628428  
CAGAAGAC -0.627342920222  
CAGAAGAG -0.669192109147  
CAGAAGCA -0.344639914042  
CAGAAGCC -0.815746500691  
CAGAAGCG -0.0697754337763  
CAGAAGGA -0.678349234461  
CAGAAGGC -1.04359543882  
CAGAAGGG -0.99469297136  
CAGAAGTA -0.0634060199475  
CAGAAGTC -0.411797301397  
CAGAATAA 1.64000997937  
CAGAATAC 0.965417524945  
CAGAATAG 0.306112621328  
CAGAATCA 6.04622041142  
CAGAATCC 12.5880522491  
CAGAATCG 4.4606256609  
CAGAATGA 0.154422270555  
CAGAATGC -0.911204645104  
CAGAATGG 0.0998384175328  
CAGAATTA 1.44255211352  
CAGAATTC 1.7930353756  
CAGACAAA -0.00224124425679  
CAGACAAC 0.150002235439  
CAGACAAG 0.776332369733  
CAGACACA -0.439340498744  
CAGACACC -0.457717619124  
CAGACACG -0.793308035874  
CAGACAGA 0.362570700808

CAGACAGC -0.681404038308  
CAGACAGG -0.649885057679  
CAGACATA -0.556154998774  
CAGACATC 0.462098516778  
CAGACATG -0.769336756506  
CAGACCAA 0.174644264296  
CAGACCAC -0.853991920404  
CAGACCAG -0.177107842648  
CAGACCCA -0.433340392672  
CAGACCCC -1.54219338649  
CAGACCCG -1.04095324375  
CAGACCGA -1.37141332207  
CAGACCGC -1.62243267883  
CAGACCGG -1.0786392892  
CAGACCTA -0.179163392136  
CAGACCTC -0.543111190358  
CAGACCTG 0.261941206908  
CAGACGAA -0.82319490105  
CAGACGAC -1.24783220461  
CAGACGAG -0.526856444602  
CAGACGCA 0.76711820365  
CAGACGCC -0.887146763691  
CAGACGCG 0.159431033031  
CAGACGGA 0.185964150764  
CAGACGGC -1.92671645651  
CAGACGGG -1.01937517857  
CAGACGTA 0.0395296697432  
CAGACGTC 0.604091312171  
CAGACTAA -0.701227163017  
CAGACTAC -0.167121128039  
CAGACTAG -0.0216650835783  
CAGACTCA -0.687481170237  
CAGACTCC -1.12757860416  
CAGACTCG -1.3777808623  
CAGACTGA 0.335889776702  
CAGACTGC -1.00257438194  
CAGACTGG 0.0714223298673  
CAGACTTA -0.204809255269  
CAGACTTC -1.05345225036  
CAGAGAAA 1.27386111524  
CAGAGAAC -0.221542602228  
CAGAGAAG 1.12881809592  
CAGAGACA -0.125669142722  
CAGAGACC -0.757418150135  
CAGAGACG -0.72279544383  
CAGAGAGA -0.545254590959  
CAGAGAGC -1.16792807883  
CAGAGAGG -0.509089077559  
CAGAGATA 0.647817225689  
CAGAGATC 4.52561216816  
CAGAGATG 1.50446091735  
CAGAGCAA -0.830047287819  
CAGAGCAC -1.08541069473  
CAGAGCAG -0.999512500042



CAGAGCCA -0.67138401522  
CAGAGCCC -1.48699082848  
CAGAGCCG -1.60874830674  
CAGAGCGA 0.626873478852  
CAGAGCGC -1.39587673421  
CAGAGCGG -1.07079201981  
CAGAGCTA 0.0784870581877  
CAGAGCTC 0.052630727106  
CAGAGCTG -0.300790342796  
CAGAGGAA 0.0231860319844  
CAGAGGAC -0.448560285633  
CAGAGGAG -0.607081164485  
CAGAGGCA -0.407693280472  
CAGAGGCC -1.43641939806  
CAGAGGCG -1.19987757155  
CAGAGGGA -0.666806181186  
CAGAGGGC -1.37582836092  
CAGAGGGG -1.4438386535  
CAGAGGTA -0.444240592308  
CAGAGGTC -0.612072648188  
CAGAGTAA -0.00368017053422  
CAGAGTAC -0.898620701872  
CAGAGTAG -0.406305774158  
CAGAGTCA -0.308765433474  
CAGAGTCC -0.93347323668  
CAGAGTCG -0.777293735698  
CAGAGTGA 0.848387352516  
CAGAGTGC -1.014772155  
CAGAGTGG -0.212218101809  
CAGAGTTA 0.111564042906  
CAGAGTTC -0.384562415655  
CAGATAAA 0.908497082146  
CAGATAAC 2.17658729529  
CAGATAAG 1.45539232386  
CAGATACA 2.40611123353  
CAGATACC 4.41219971287  
CAGATACG 4.4226052816  
CAGATAGA 1.19974975026  
CAGATAGC 0.902873361883  
CAGATAGG -0.716115844794  
CAGATATA 2.91882822895  
CAGATATC 17.0878318184  
CAGATATG 7.82885646364  
CAGATCAA -0.251302478828  
CAGATCAC 1.91802294358  
CAGATCAG 0.969445769082  
CAGATCCA 2.5563940929  
CAGATCCC 3.45248001955  
CAGATCCG 3.10139033498  
CAGATCGA 1.83368192027  
CAGATCGC 8.60412421112  
CAGATCGG 1.56807365804  
CAGATCTA 2.56097858863  
CAGATCTC 12.6941185194

CAGATCTG 7.29474272607  
CAGATGAA -0.21469208906  
CAGATGAC 0.471633901501  
CAGATGAG -0.228062736922  
CAGATGCA -0.128395441699  
CAGATGCC 0.0623582601161  
CAGATGCG 1.23950570948  
CAGATGGA -0.0904333522315  
CAGATGGC -0.978130538532  
CAGATGGG -0.523884703773  
CAGATGTA -0.268618307808  
CAGATGTC 0.0312200370334  
CAGATTAA -0.330421565399  
CAGATTAC 18.938425286  
CAGATTAG 1.5893823409  
CAGATTCA 3.78775858567  
CAGATTCC 12.2232661181  
CAGATTCG 7.90819996608  
CAGATTGA 0.578698593476  
CAGATTGC 19.944230174  
CAGATTGG 1.02781096714  
CAGATTTA 2.82159994707  
CAGATTTT 22.0974717648  
CAGCAAAA 1.10829195413  
CAGCAAAC 0.256287092658  
CAGCAAAG 0.279931740757  
CAGCAACA -0.572394131181  
CAGCAACC -0.767040553259  
CAGCAACG -0.618755578072  
CAGCAAGA 0.147523043738  
CAGCAAGC -0.657903241201  
CAGCAAGG -0.235413918159  
CAGCAATA 0.941571152372  
CAGCAATC 4.62457020097  
CAGCAATG -0.253233121522  
CAGCACAA -0.181375075118  
CAGCACAC -1.41637373108  
CAGCACAG -0.310388805452  
CAGCACCA -0.7848599648  
CAGCACCC -1.01618963894  
CAGCACCG -0.871640625992  
CAGCACGA 0.159494110963  
CAGCACGC -0.254054175521  
CAGCACGG -0.904276481546  
CAGCACTA -0.0251528976483  
CAGCACTC 0.534711000222  
CAGCACTG -0.274285953627  
CAGCAGAA -0.82647432895  
CAGCAGAC -0.182454269826  
CAGCAGAG -0.442473369338  
CAGCAGCA -0.149327114213  
CAGCAGCC -0.478436533731  
CAGCAGCG -0.659457289907  
CAGCAGGA -1.01689619505

CAGCAGGC -1.55373185985  
CAGCAGGG -0.449728164165  
CAGCAGTA -0.0412379783417  
CAGCAGTC -1.03260634718  
CAGCATAA 0.0522784899444  
CAGCATAC 0.608062099181  
CAGCATAG -0.296212925119  
CAGCATCA 1.97936467056  
CAGCATCC 0.428412819612  
CAGCATCG 0.575734971589  
CAGCATGA -0.565894606107  
CAGCATGC -0.0780326056322  
CAGCATGG 0.362462448253  
CAGCATT A 0.600597460939  
CAGCATTC -0.622964104349  
CAGCCAAA 0.240434338603  
CAGCCAAC -0.755876592107  
CAGCCAAG 0.113789465635  
CAGCCACA -0.170716778308  
CAGCCACC -0.0591546090045  
CAGCCACG -1.20420392657  
CAGCCAGA -0.359080804958  
CAGCCAGC -1.62691412646  
CAGCCAGG -0.73634137756  
CAGCCATA -0.075040047004  
CAGCCATC -0.851338067368  
CAGCCATG -1.21169750155  
CAGCCCAA -0.957533199872  
CAGCCCAC -1.51980967249  
CAGCCCAG -0.86966314325  
CAGCCCCA -1.11230083772  
CAGCCCCC -1.17975841773  
CAGCCCCG -1.35050517367  
CAGCCCGA -0.115649119633  
CAGCCCGC -0.737051680867  
CAGCCCGG -0.508350670223  
CAGCCCTA -1.16785313475  
CAGCCCTC -0.63910435221  
CAGCCCTG -1.01643362355  
CAGCCGAA -0.404520439703  
CAGCCGAC -0.912920864466  
CAGCCGAG -0.334830567081  
CAGCCGCA 0.185015691834  
CAGCCGCC -0.0533959894029  
CAGCCGCG -0.242367479432  
CAGCCGGA -0.635755601038  
CAGCCGGC -1.302079642  
CAGCCGGG -0.975313057595  
CAGCCGTA -0.0917677731572  
CAGCCGTC -0.93085498208  
CAGCCTAA -0.614481892084  
CAGCCTAC -1.06418486671  
CAGCCTAG -0.747847375152  
CAGCCTCA -1.25661898127

CAGCCTCC -1.16861402531  
CAGCCTCG -0.863418636217  
CAGCCTGA -0.117337234967  
CAGCCTGC -1.60444984757  
CAGCCTGG -0.370721285532  
CAGCCTTA -0.534438495231  
CAGCCTTC -1.12482440933  
CAGCGAAA 0.352261934846  
CAGCGAAC -0.807167693838  
CAGCGAAG 0.613736614874  
CAGCGACA -1.26573655277  
CAGCGACC 0.0224859293989  
CAGCGACG -0.760163185131  
CAGCGAGA 0.207524312634  
CAGCGAGC -0.645585349442  
CAGCGAGG -0.563035281394  
CAGCGATA 0.161534047102  
CAGCGATC 1.8775581383  
CAGCGATG -0.387505427921  
CAGCGCAA 1.9887022862  
CAGCGCAC -0.684866454663  
CAGCGCAG -0.704290293985  
CAGCGCCA -1.38230810908  
CAGCGCCC -1.71420211742  
CAGCGCCG -1.15950269916  
CAGCGCGA 0.47752450595  
CAGCGCGC 0.171982500497  
CAGCGCGG 0.709281985866  
CAGCGCTA -0.175888960508  
CAGCGCTC 0.295113537145  
CAGCGCTG 1.47750790461  
CAGCGGAA -0.64185729797  
CAGCGGAC 0.634154295927  
CAGCGGAG -0.392632851853  
CAGCGGCA -1.30349379509  
CAGCGGCC -1.24189954821  
CAGCGGCG -1.12544498792  
CAGCGGGA -0.47654398761  
CAGCGGGC -0.746409697943  
CAGCGGGG -0.849713029966  
CAGCGGTA 0.131179405979  
CAGCGGTC -1.1115867872  
CAGCGTAA -0.314592751813  
CAGCGTAC -0.45811294913  
CAGCGTAG -0.654694385639  
CAGCGTCA 0.479258628619  
CAGCGTCC -0.407600849443  
CAGCGTCG 0.23176747246  
CAGCGTGA -0.255659852369  
CAGCGTGC -0.851024967669  
CAGCGTGG 0.158986989376  
CAGCGTTA 0.709357346299  
CAGCGTTC -0.403444367665  
CAGCTAAA -0.606581953661

CAGCTAAC 0.427718337833  
CAGCTAAG -0.554564102562  
CAGCTACA -0.410279683838  
CAGCTACC -0.568295314706  
CAGCTACG -0.21623239802  
CAGCTAGA -0.76461403059  
CAGCTAGC -0.163814636999  
CAGCTAGG -0.46976321407  
CAGCTATA -0.185556330078  
CAGCTATC 0.705257697111  
CAGCTATG 0.729822283756  
CAGCTCAA -0.298273262701  
CAGCTCAC -0.747756193192  
CAGCTCAG -0.603936427745  
CAGCTCCA 0.0282959689644  
CAGCTCCC -0.694535906014  
CAGCTCCG -1.60161363061  
CAGCTCGA 0.170763826534  
CAGCTCGC -0.647449375178  
CAGCTCGG -0.569714464074  
CAGCTCTA 0.38199558102  
CAGCTCTC -0.0603832755105  
CAGCTGAA -0.614612211507  
CAGCTGAC -0.7693311357  
CAGCTGAG -0.747847375152  
CAGCTGCA -0.830541086015  
CAGCTGCC -0.188475193697  
CAGCTGCG -0.544940034014  
CAGCTGGA 0.0987225834982  
CAGCTGGC -0.836259319086  
CAGCTGGG -0.581120744408  
CAGCTGTA -0.3197205921  
CAGCTGTC -1.40607495766  
CAGCTTAA -0.97379918724  
CAGCTTAC -1.14231885503  
CAGCTTAG -0.822678619631  
CAGCTTCA -0.0614928642054  
CAGCTTCC -0.878833383777  
CAGCTTCG -0.506403789646  
CAGCTTGA -1.45638637377  
CAGCTTGC -1.31031099978  
CAGCTTGG 0.154385631229  
CAGCTTTA 0.483912863976  
CAGCTTTC 1.00282253011  
CAGGAAAA 0.964986596503  
CAGGAAAC 0.942068281416  
CAGGAAAG -0.460542594469  
CAGGAACA -0.738809119472  
CAGGAACC -0.754543628428  
CAGGAACG -1.13575583567  
CAGGAAGA 0.093198580493  
CAGGAAGC -0.155429852034  
CAGGAAGG -0.956482941905  
CAGGAATA 0.621343438685

CAGGAATC 5.97261221264  
CAGGAATG 0.772784808579  
CAGGACAA 0.164888210901  
CAGGACAC -0.748444429632  
CAGGACAG -0.92481532219  
CAGGACCA -0.483974692839  
CAGGACCC -1.35482278522  
CAGGACCG -1.24069378128  
CAGGACGA 0.315905314049  
CAGGACGC -1.04205367261  
CAGGACGG -0.815753370564  
CAGGACTA -0.429995596882  
CAGGACTC -1.22370499992  
CAGGACTG 1.00966534069  
CAGGAGAA -0.914246333738  
CAGGAGAC -0.823123704177  
CAGGAGAG -0.0469006278892  
CAGGAGCA -0.240123737039  
CAGGAGCC -1.45868320155  
CAGGAGCG -0.286432098543  
CAGGAGGA -0.277464207024  
CAGGAGGC -0.916868335541  
CAGGAGGG -1.18835491972  
CAGGAGTA -0.337447364435  
CAGGAGTC -1.02767398602  
CAGGATAA 1.70480371381  
CAGGATAC 3.23039886086  
CAGGATAG 0.60283308439  
CAGGATCA 3.06879923769  
CAGGATCC 3.18066493051  
CAGGATCG 2.78747187168  
CAGGATGA 0.831250140254  
CAGGATGC -0.400177430444  
CAGGATGG -0.55271631471  
CAGGATTA 3.0874844615  
CAGGATTC 5.8501063345  
CAGGCAAA 0.209200561822  
CAGGCAAC -0.435135303315  
CAGGCAAG -0.433368288523  
CAGGCACA -1.04802671554  
CAGGCACC -0.874977927374  
CAGGCACG -0.963415685379  
CAGGCAGA -0.547349486088  
CAGGCAGC -0.724104675218  
CAGGCAGG -1.49118519865  
CAGGCATA 1.04838852889  
CAGGCATC -0.720936830721  
CAGGCATG -0.59836371109  
CAGGCCAA -0.126765199847  
CAGGCCAC -1.38629534215  
CAGGCCAG -1.0510313485  
CAGGCCCA -1.20842036361  
CAGGCCCC -1.32133027723  
CAGGCCCG -1.45190575885

CAGGCCGA -0.687094791885  
CAGGCCGC -1.38308669477  
CAGGCCGG -1.1338618323  
CAGGCCTA -1.16381822892  
CAGGCCTC -1.36926388431  
CAGGCCTG 1.22327136517  
CAGGCGAA -0.650906378905  
CAGGCGAC -1.01281007743  
CAGGCGAG -0.679155507822  
CAGGCGCA -0.42389494084  
CAGGCGCC -0.544085255181  
CAGGCGCG -0.758541478577  
CAGGCGGA -0.149541329366  
CAGGCGGC -0.396558256061  
CAGGCGGG -1.26540888061  
CAGGCGTA -0.289819987177  
CAGGCGTC -1.20523732212  
CAGGCTAA -0.255092567342  
CAGGCTAC -0.981554650137  
CAGGCTAG -1.40788777161  
CAGGCTCA -1.25738653353  
CAGGCTCC -1.29249887447  
CAGGCTCG -0.995194472142  
CAGGCTGA -0.403773705247  
CAGGCTGC -0.677007319127  
CAGGCTGG -0.380317250052  
CAGGCTTA -0.459197348288  
CAGGCTTC -0.122563543444  
CAGGGAAA 0.135092735864  
CAGGGAAC -0.60891937615  
CAGGGAAG -0.423133425747  
CAGGGACA -0.767040553259  
CAGGGACC -1.29304679894  
CAGGGACG -1.0979261474  
CAGGGAGA -0.709028841428  
CAGGGAGC -1.58983533621  
CAGGGAGG -1.40979322477  
CAGGGATA 1.09064241583  
CAGGGATC 0.442273726644  
CAGGGATG -0.465034867348  
CAGGGCAA 0.168262359788  
CAGGGCAC -0.597393601649  
CAGGGCAG -1.43653847588  
CAGGGCCA -0.867818061712  
CAGGGCCC -1.16291307102  
CAGGGCCG -1.24887226185  
CAGGGCGA -0.131928638571  
CAGGGCGC -0.115521714703  
CAGGGCGG -0.0875604959485  
CAGGGCTA -0.644572355335  
CAGGGCTC -1.50051407081  
CAGGGGAA 0.475478324471  
CAGGGGAC -0.936619847021  
CAGGGGAG -0.949741930361

CAGGGGCA -1.44405286866  
CAGGGGCC -1.44718865374  
CAGGGGCG -1.01468492842  
CAGGGGGA 0.175919979028  
CAGGGGGC -1.2651072307  
CAGGGGGG -1.06782298529  
CAGGGGTA -0.194081843365  
CAGGGGTC -1.30885479473  
CAGGGTAA 0.000495463619836  
CAGGGTAC -0.444261826463  
CAGGGTAG -1.2895785536  
CAGGGTCA -0.70175343698  
CAGGGTCC -1.3451577056  
CAGGGTCG -1.08178943857  
CAGGGTGA -0.382630732072  
CAGGGTGC -1.27283979402  
CAGGGTGG -0.925420287433  
CAGGGTTA 0.150167528764  
CAGGGTTC -0.768163881701  
CAGGTAAA 0.294833537747  
CAGGTAAAC 0.205713164108  
CAGGTAAAG 0.0895163281789  
CAGGTACA -0.807258459442  
CAGGTACC -0.338704551325  
CAGGTACG 0.120068322037  
CAGGTAGA -0.236469588754  
CAGGTAGC -1.24225011994  
CAGGTAGG -0.813624958779  
CAGGTATA 0.266083532583  
CAGGTATC 1.74159625932  
CAGGTATG 0.640233717814  
CAGGTCAA 0.216605036625  
CAGGTCCAC -0.891571795079  
CAGGTCCAG -1.26833065872  
CAGGTCCA -0.644598585762  
CAGGTCCC -1.81885569189  
CAGGTCCG -1.0672912987  
CAGGTCGA -0.602518735623  
CAGGTCGC -0.192183051905  
CAGGTCCG -1.26268507977  
CAGGTCTA -0.234853919362  
CAGGTCTC -1.09133814668  
CAGGTGAA -0.21209257048  
CAGGTGAC -0.244103683881  
CAGGTGAG -0.414775079387  
CAGGTGCA -0.691970320446  
CAGGTGCC -1.65424935399  
CAGGTGCG -0.709504319961  
CAGGTGGA -0.0544133552475  
CAGGTGGC -1.79493354253  
CAGGTGGG -0.96809844112  
CAGGTGTA -0.72077944816  
CAGGTGTC -1.03395846323  
CAGGTTAA 0.497116136732



CAGGTTAC 0.895914804338  
CAGGTTAG -1.07399234007  
CAGGTTCA 0.694540902286  
CAGGTTCC -0.593749862264  
CAGGTTCCG 0.300588201967  
CAGGTTGA -0.250366926935  
CAGGTTGC -0.314534461975  
CAGGTTGG 0.58657355054  
CAGGTTTA -0.288263232156  
CAGGTTTC -0.485615759946  
CAGTAAAA 1.61413491227  
CAGTAAAC -0.413475216008  
CAGTAAAG 0.597806834962  
CAGTAACA 0.145982734779  
CAGTAACC -0.570283622703  
CAGTAACG -0.700505618099  
CAGTAAGA 0.930200886831  
CAGTAAGC -0.306134480017  
CAGTAAGG -0.476992819359  
CAGTAATA 0.732373088686  
CAGTAATC 4.5941222961  
CAGTAATG 0.45270968936  
CAGTACAA 0.217629688699  
CAGTACAC -0.561733960769  
CAGTACAG -0.530705239309  
CAGTACCA 0.0937796052674  
CAGTACCC -0.794511304665  
CAGTACCG -0.601521146687  
CAGTACGA 0.595020788902  
CAGTACGC -0.64121985696  
CAGTACGG -0.768713055243  
CAGTACTA 0.613218251675  
CAGTACTC -0.54371115933  
CAGTACTG 0.871379570791  
CAGTAGAA -0.0241465652373  
CAGTAGAC 0.0893568638374  
CAGTAGAG -0.18324159899  
CAGTAGCA -0.341720009533  
CAGTAGCC -0.695592409321  
CAGTAGCG 0.188985646133  
CAGTAGGA 0.63707690675  
CAGTAGGC -0.98367806565  
CAGTAGGG -0.767391957709  
CAGTAGTA 0.708573139805  
CAGTAGTC 0.384601136762  
CAGTATAA 1.25473101507  
CAGTATAC 0.240672077869  
CAGTATAG -0.0774505399679  
CAGTATCA 1.51616739035  
CAGTATCC 2.71977821782  
CAGTATCG 1.45511024268  
CAGTATGA 1.19042420895  
CAGTATGC 0.224470001145  
CAGTATGG -0.119252680667

CAGTATTA 1.30468020147  
CAGTATTC 1.48727145241  
CAGTCAAA 1.25409940304  
CAGTCAAC 0.348639013259  
CAGTCAAG 0.281074637931  
CAGTCACA -0.622370588895  
CAGTCACC -0.771371071839  
CAGTCACG -0.54425845927  
CAGTCAGA 0.326891491196  
CAGTCAGC -0.69029490397  
CAGTCAGG 0.193516848296  
CAGTCATA -0.0150304509883  
CAGTCATC -0.788666499375  
CAGTCATG 0.0643836237957  
CAGTCCAA -0.507698656754  
CAGTCCAC -1.26256246293  
CAGTCCAG -0.645138183116  
CAGTCCCA -0.530032824397  
CAGTCCCC -1.22898585103  
CAGTCCCG -1.21972630215  
CAGTCCGA 0.206767377457  
CAGTCCGC -1.11083068474  
CAGTCCGG -1.11040017265  
CAGTCCTA -0.796867879529  
CAGTCCTC -0.768554007257  
CAGTCGAA 0.440007709207  
CAGTCGAC -0.231522655141  
CAGTCGAG -1.3668538077  
CAGTCGCA 0.00963281202396  
CAGTCGCC -0.510840062646  
CAGTCGCG -0.446619442217  
CAGTCGGA 0.28320367425  
CAGTCGGC -0.89738016922  
CAGTCGGG -0.98025041502  
CAGTCGTA -0.295108749052  
CAGTCGTC -0.39629511908  
CAGTCTAA -0.667984052262  
CAGTCTAC 0.0274099634325  
CAGTCTAG -0.402151165981  
CAGTCTCA -0.250680651168  
CAGTCTCC -0.668597760981  
CAGTCTCG 0.636456328158  
CAGTCTGA 1.5010580399  
CAGTCTGC -0.718713281594  
CAGTCTGG -0.385581446924  
CAGTCTTA -0.287946801609  
CAGTCTTC -0.746048925483  
CAGTGAAA -0.0654649002837  
CAGTGAAC 0.601139764607  
CAGTGAAG -0.674893063445  
CAGTGACA -0.183311963152  
CAGTGACC 0.0298198318624  
CAGTGACG -1.42686590186  
CAGTGAGA 0.62062668186

CAGTGAGC -1.28580949107  
CAGTGAGG -1.01262812986  
CAGTGATA 0.130153088481  
CAGTGATC 0.849829193286  
CAGTGATG 0.273144305522  
CAGTGCAA 0.56704791218  
CAGTGCAC -0.0296520404012  
CAGTGCAG -0.484575078167  
CAGTGCCA -1.11521782773  
CAGTGCCC -0.836998767312  
CAGTGCCG -0.963479387844  
CAGTGCGA 2.30957618437  
CAGTGCGC 1.09153612395  
CAGTGCGG 0.109469564133  
CAGTGCTA -0.607364702909  
CAGTGCTC -0.523618235944  
CAGTGGAA -0.650965501455  
CAGTGGAC 0.512736564149  
CAGTGGAG -0.587218485957  
CAGTGGCA -0.773237595711  
CAGTGGCC -1.09941961631  
CAGTGGCG -0.683992107099  
CAGTGGGA 0.242435553635  
CAGTGGGC -1.79478323802  
CAGTGGGG -0.78062583263  
CAGTGGTA -0.290804669077  
CAGTGGTC -0.855679203026  
CAGTGTA 0.15597236388  
CAGTGTAAC -0.355382314761  
CAGTGTAG 0.079217138404  
CAGTGTC 0.422718735188  
CAGTGTC -0.803113219275  
CAGTGTCG -1.1602117534  
CAGTGTTA -0.237132219301  
CAGTGTTGC -1.23171048459  
CAGTGTTGG -0.0278463045027  
CAGTGTTA 0.111273634607  
CAGTGTTTC 0.485560176423  
CAGTTAAA 0.146035403811  
CAGTTAAC 0.307953539307  
CAGTTAAG -0.0608966424376  
CAGTTACA 1.09853111264  
CAGTTACC 0.29322557094  
CAGTTACG 0.505817976778  
CAGTTAGA 0.873035210357  
CAGTTAGC 0.164688984563  
CAGTTAGG -0.809195972009  
CAGTTATA 0.393102085046  
CAGTTATC -0.368982166591  
CAGTTATG 1.71423542589  
CAGTTCAA 0.00697687720806  
CAGTTCAC -0.120630402615  
CAGTTCAG -0.546932713749  
CAGTTCCA -0.760753994271

CAGTTCCC -0.894777319792  
CAGTTCCG -0.872267033569  
CAGTTCGA 0.524772582907  
CAGTTCGC -0.193304298567  
CAGTTCGG -0.819401065332  
CAGTTCTA -0.159258661654  
CAGTTCTC -0.79280674327  
CAGTTGAA 0.446268454124  
CAGTTGAC 0.705957383341  
CAGTTGAG -0.613637938506  
CAGTTGCA 0.106218656617  
CAGTTGCC -1.37443315202  
CAGTTGCG -0.48214522465  
CAGTTGGA -0.433314578601  
CAGTTGGC -1.25355418488  
CAGTTGGG -0.207914854546  
CAGTTGTA -0.490654083697  
CAGTTGTC -0.3998316468  
CAGTTTAA -0.0896572646791  
CAGTTTAC -0.163945580956  
CAGTTTAG 0.333261321381  
CAGTTTCA 0.221697694831  
CAGTTTCC -0.447997788699  
CAGTTTCG 0.282396359999  
CAGTTTGA -0.248355719358  
CAGTTTGC -1.14697080042  
CAGTTTGG 0.0510635631858  
CAGTTTTA -0.277691953747  
CAGTTTTC -0.194424920695  
CATAAAAA 1.39225256356  
CATAAAAC 2.41037971507  
CATAAAAG 0.595574334181  
CATAAACA 0.806105777903  
CATAAACC -0.272117571667  
CATAAACG -0.532184343939  
CATAAAGA 1.72879914183  
CATAAAGC -0.958258491995  
CATAAAGG 0.345554648137  
CATAAATA 1.02287215247  
CATAAATC 1.49589002126  
CATAAATG -0.00938820288392  
CATAACAA 0.054744982788  
CATAACAC 1.18319918358  
CATAACAG 0.174927386365  
CATAACCA 0.166024030023  
CATAACCC -0.309416614231  
CATAACCG -0.373579153  
CATAACGA 0.194887075836  
CATAACGC 0.109469564133  
CATAACGG -0.808548330278  
CATAACTA 1.54346639491  
CATAACTC 0.683687334519  
CATAAGAA 0.798619072794  
CATAAGAC 0.644051494

CATAAGAG 0.971144917848  
CATAAGCA 0.0719384031083  
CATAAGCC -0.993106446887  
CATAAGCG -0.683930070057  
CATAAGGA 1.19317569747  
CATAAGGC -0.836257653662  
CATAAGGG -1.00791352289  
CATAAGTA 0.897738235366  
CATAAGTC -0.116983124203  
CATAATAA 0.392539588112  
CATAATAC 2.77484775009  
CATAATAG 0.485644280331  
CATAATCA 2.52535371348  
CATAATCC 4.81896347861  
CATAATCG 1.90860746938  
CATAATGA 0.538284167269  
CATAATGC -0.192733266336  
CATAATGG -0.367815537127  
CATAATTA 1.74769358451  
CATAATTC 0.381106036462  
CATAACAA 1.76936637068  
CATAACAAC 1.00141524688  
CATAACAAG 2.15671066883  
CATAACACA 1.02683086516  
CATAACACC 0.240593802944  
CATAACACG -1.01950882884  
CATAACAGA 1.25007511429  
CATAACAGC -0.542145869012  
CATAACAGG -0.497035780028  
CATAACATA 0.236071344256  
CATAACATC 0.394935716795  
CATAACATG 0.78766682866  
CATAACCAA -1.22958248916  
CATAACCAC 0.218228200425  
CATAACCAG -0.850848849088  
CATAACCCA 0.608770737064  
CATAACCCC -0.263917648759  
CATAACCCG -0.762577008943  
CATAACCGA 1.96933923485  
CATAACCGC -0.93876970114  
CATAACCGG -0.171467468146  
CATAACCTA -0.358924671464  
CATAACCTC 0.279315117546  
CATACGAA 0.0748770436367  
CATACGAC 0.198951126587  
CATACGAG 0.492859729518  
CATACGCA 0.0267612808109  
CATACGCC -0.757497257771  
CATACGCG -0.386130620465  
CATACGGA 0.175660589251  
CATACGGC -1.10359733225  
CATACGGG -1.07108867344  
CATACGTA 0.219863854904  
CATACGTC -0.361209841277

CATACTAA 0.735427684356  
CATACTAC 0.317084850549  
CATACTAG 1.1962798395  
CATACTCA 0.800323217832  
CATACTCC -0.0394747107535  
CATACTCG 0.170138043492  
CATACTGA 1.33904955516  
CATACTGC 0.0591737613797  
CATACTGG -0.356674267376  
CATACTTA 1.01106096594  
CATACTTC 0.153616621728  
CATAGAAA 0.653018969163  
CATAGAAC 0.906074306681  
CATAGAAG 0.361229201831  
CATAGACA 2.1746329203  
CATAGACC -0.517804657352  
CATAGACG 0.245746000057  
CATAGAGA 0.703014995609  
CATAGAGC -0.983567523137  
CATAGAGG -0.436694972827  
CATAGATA 3.60968562985  
CATAGATC 2.17506364057  
CATAGATG 0.937747339024  
CATAGCAA 0.924958965004  
CATAGCAC 0.543977627159  
CATAGCAG 0.5849545503  
CATAGCCA -0.919025059534  
CATAGCCC 0.168185542109  
CATAGCCG -0.991650033658  
CATAGCGA 1.35592092412  
CATAGCGC 0.318381591259  
CATAGCGG -0.337001863533  
CATAGCTA -0.690399409322  
CATAGCTC 0.286045720191  
CATAGGAA 1.66120499704  
CATAGGAC -0.231041763981  
CATAGGAG 1.0355601847  
CATAGGCA -0.872498527495  
CATAGGCC -0.660098269943  
CATAGGCG -1.23036398934  
CATAGGGA 0.139826078857  
CATAGGGC -1.15539305743  
CATAGGGG -0.819260753366  
CATAGGTA -0.0816734305261  
CATAGGTC -0.626058670193  
CATAGTAA 0.708921005228  
CATAGTAC -0.363028276033  
CATAGTAG 0.841883872061  
CATAGTCA 0.354564799788  
CATAGTCC -0.354353290949  
CATAGTCG -0.339501664855  
CATAGTGA 0.555212577006  
CATAGTGC 0.186696520938  
CATAGTGG -0.255415867763

CATAGTTA -0.511001192411  
CATAGTTC 0.164939422687  
CATATAAA 1.45335884124  
CATATAAC 2.11830474389  
CATATAAG 1.02368363028  
CATATACA 1.80571757885  
CATATACC 0.326980383199  
CATATACG 0.799269004483  
CATATAGA 1.18397152393  
CATATAGC -0.0851462557807  
CATATAGG -0.0274062162286  
CATATATA 1.2223516348  
CATATATC 2.12491522783  
CATATATG 5.25028933286  
CATATCAA 2.42136401862  
CATATCAC 3.08209265152  
CATATCAG 2.56026224816  
CATATCCA 5.86219502229  
CATATCCC 2.90492755992  
CATATCCG 3.36579761837  
CATATCGA 2.12649342519  
CATATCGC 4.2617465639  
CATATCGG 1.97272025361  
CATATCTA 5.36394327462  
CATATCTC 5.20438150581  
CATATGAA 0.807015723904  
CATATGAC 0.832857690704  
CATATGAG 0.557816259146  
CATATGCA -0.0875846445955  
CATATGCC 0.730446401374  
CATATGCG 0.56798388043  
CATATGGA 1.33098390705  
CATATGGC -0.958792052187  
CATATGGG -0.969268817789  
CATATGTA 0.416140727012  
CATATGTC -0.758982607741  
CATATTAA 1.76759498415  
CATATTAC 2.35670372627  
CATATTAG 1.29837032654  
CATATTCA 0.233547186109  
CATATTCC 4.33253873899  
CATATTGC 0.83409884789  
CATATTGA 0.422095033926  
CATATTGC 1.56807365804  
CATATTGG -0.266828809793  
CATATTTA 1.1434967261  
CATATTTTC 5.81926809591  
CATCAAAA 1.7746934373  
CATCAAAC 0.911997803252  
CATCAAAG -0.429098974273  
CATCAACA 1.59263824469  
CATCAACC -0.81708154615  
CATCAACG 0.138765620169  
CATCAAGA 0.865359271454

CATCAAGC -1.02207961886  
CATCAAGG -0.0524627274669  
CATCAATA 0.954404076482  
CATCAATC -0.492485841845  
CATCAATG 0.0307574655362  
CATCACAA -0.0681878684129  
CATCACAC 1.46003386036  
CATCACAG -0.297429309123  
CATCACCA 0.218361226161  
CATCACCC -0.944618253634  
CATCACCG 0.111192028835  
CATCACGA 1.90417535994  
CATCACGC 0.0588298513377  
CATCACGG -0.0835320436344  
CATCACTA 0.70832894702  
CATCACTC 0.337361595102  
CATCAGAA 0.883592332664  
CATCAGAC 0.0624933676326  
CATCAGAG -0.0962577560785  
CATCAGCA 0.156598355101  
CATCAGCC -0.458693973904  
CATCAGCG -0.436789485636  
CATCAGGA 0.644428712521  
CATCAGGC -0.640824318776  
CATCAGGG -1.11566603495  
CATCAGTA 0.688492082564  
CATCAGTC -0.402151165981  
CATCATAA 0.960894233546  
CATCATAC 0.996171659634  
CATCATAG 0.931972689717  
CATCATCA 0.217066983588  
CATCATCC -0.144868566168  
CATCATCG 0.33072196624  
CATCATGA 0.95552782128  
CATCATGC -0.478545827176  
CATCATGG -0.678799939812  
CATCATA 0.393219913789  
CATCATTC -0.0856510874102  
CATCCAAA 1.67250593931  
CATCCAAC 1.58158774054  
CATCCAAG 0.156344586129  
CATCCACA 0.23333463638  
CATCCACC 0.233163097715  
CATCCACG 0.695971293265  
CATCCAGA 0.909960989782  
CATCCAGC -0.625297987812  
CATCCAGG 0.274812435768  
CATCCATA 0.278097068118  
CATCCATC -0.520738093431  
CATCCATG -0.163122445177  
CATCCCAA -1.09921060561  
CATCCCAC -0.802290916208  
CATCCCAG -1.07802079238  
CATCCCCA -0.28733517467



CATCCCC -1.20250061424  
CATCCCCG 0.339763136412  
CATCCCGA 0.426911023582  
CATCCCGC -0.342218179466  
CATCCCGG -0.247949355919  
CATCCCTA -0.363590564789  
CATCCCTC -0.334027832746  
CATCCGAA 0.26191809915  
CATCCGAC -0.174752516852  
CATCCGAG -0.287313732337  
CATCCGCA 0.836598649212  
CATCCGCC -0.313372828782  
CATCCGCG 0.0427435215764  
CATCCGGA 0.824661306822  
CATCCGGC -0.643294975179  
CATCCGGG -1.10399620128  
CATCCGTA 0.720953276783  
CATCCGTC -0.390035831408  
CATCCTAA -0.0246776272937  
CATCCTAC 0.180279642527  
CATCCTAG -0.303340315015  
CATCCTCA -0.428062456053  
CATCCTCC -0.368741721011  
CATCCTCG -0.919623571259  
CATCCTGA 0.242820266564  
CATCCTGC 0.0535429630649  
CATCCTGG -0.386279675907  
CATCCTTA 0.0794298963114  
CATCCTTC 0.0218151799102  
CATCGAAA 0.858658021906  
CATCGAAC 0.481629359587  
CATCGAAG -0.156943930567  
CATCGACA -0.240712880755  
CATCGACC -0.321432647902  
CATCGACG -0.0901958211432  
CATCGAGA 1.92280395933  
CATCGAGC -1.23475529589  
CATCGAGG -0.942964904025  
CATCGATA 1.50237330845  
CATCGATC 0.494564290912  
CATCGATG 1.34462726808  
CATCGCAA 0.395187195809  
CATCGCAC 0.97787572867  
CATCGCAG -0.445134092248  
CATCGCCA -0.0757634655246  
CATCGCCC -0.636026648783  
CATCGCCG -0.593133863587  
CATCGCGA 2.26986123621  
CATCGCGC -0.0805328233105  
CATCGCGG 0.0760678217482  
CATCGCTA 0.0839409052098  
CATCGCTC -0.0392373878431  
CATCGGAA 0.580394827751  
CATCGGAC -0.0516144021514

CATCGGAG -0.0096786111821  
CATCGGCA -0.872590958523  
CATCGGCC -0.711391245276  
CATCGGCG -0.5051896956  
CATCGGGA -0.155168796833  
CATCGGGC -1.29605205643  
CATCGGGG -0.23121392718  
CATCGGTA 0.462098516778  
CATCGGTC -1.07548622534  
CATCGTAA 1.21926268976  
CATCGTAC -0.0390304589195  
CATCGTAG 0.364684123778  
CATCGTCA 0.475710026576  
CATCGTCC 1.37883819832  
CATCGTCG -0.19381079562  
CATCGTGA -0.441855288881  
CATCGTGC -0.925092823453  
CATCGTGG -0.934230171857  
CATCGTTA 0.582940428232  
CATCGTTC -0.520597365109  
CATCTAAA 1.22199231959  
CATCTAAC 0.858658021906  
CATCTAAG 0.227164865245  
CATCTACA 2.21059650105  
CATCTACC 0.175262344753  
CATCTACG 0.963639684898  
CATCTAGA 1.27756064633  
CATCTAGC -0.754409145445  
CATCTAGG 0.123257192512  
CATCTATA 1.81874202671  
CATCTATC 0.51554738339  
CATCTCAA 0.21121884745  
CATCTCAC 0.508285510512  
CATCTCAG -0.269087124645  
CATCTCCA -0.369986833578  
CATCTCCC 0.151344983485  
CATCTCCG 0.287350996197  
CATCTCGA 1.42372303872  
CATCTCGC 0.122294993835  
CATCTCGG -0.520011552241  
CATCTCTA 0.115246087042  
CATCTCTC -0.942952621524  
CATCTGAA 0.805315742425  
CATCTGAC -0.186489175658  
CATCTGAG 0.223329810285  
CATCTGCA 0.477178930484  
CATCTGCC -0.167990895687  
CATCTGCG 0.420791839699  
CATCTGGA 1.70266364406  
CATCTGGC -0.668536973008  
CATCTGGG 0.294722995233  
CATCTGTA 0.505079361264  
CATCTGTC -0.747635033601  
CATCTTAA -0.521105735764

CATCTTAC 0.942068281416  
CATCTTAG -0.125846094014  
CATCTTCA 1.46590406336  
CATCTTCC 1.78208521325  
CATCTTCG 0.263711136191  
CATCTTGA 0.15386310447  
CATCTTGC 0.0685026335361  
CATCTTGG -0.817112564671  
CATCTTTA 0.777533140388  
CATCTTTC 0.193799762187  
CATGAAAA 2.30412317006  
CATGAAAC 1.73226093365  
CATGAAAG 0.373307272543  
CATGAACA 0.0301314743157  
CATGAACC -0.239988421345  
CATGAACG 0.132338332858  
CATGAAGA 1.06010166359  
CATGAAGC -0.781525786087  
CATGAAGG 0.240770962415  
CATGAATA 0.801161342426  
CATGAATC 1.25646617863  
CATGAATG 0.62710996905  
CATGACAA -0.16526771938  
CATGACAC -0.582143106524  
CATGACAG -0.852324206514  
CATGACCA 0.187162006927  
CATGACCC -0.70175343698  
CATGACCG -1.02305181008  
CATGACGA -0.0809208670867  
CATGACGC -1.22426562325  
CATGACGG -0.144224047106  
CATGACTA -0.01430057895  
CATGACTC -0.506505796862  
CATGAGAA 0.932613045219  
CATGAGAC 0.0659391297484  
CATGAGAG 0.101218637617  
CATGAGCA -0.0274824093735  
CATGAGCC -0.943650850507  
CATGAGCG -0.815753995098  
CATGAGGA -0.570424142847  
CATGAGGC -0.944323473598  
CATGAGGG -0.629685755339  
CATGAGTA 1.81164003453  
CATGAGTC -0.671685040596  
CATGATAA 1.03835476606  
CATGATAC 1.3905315561  
CATGATAG 0.926454515695  
CATGATCA 0.378877074706  
CATGATCC 1.42283703319  
CATGATCG 1.07528595811  
CATGATGA 0.409797127254  
CATGATGC -0.14728447176  
CATGATGG 0.0558683112303  
CATGATTA 3.54044229902

CATGATTC 3.74412739314  
CATGCAAA 0.247551111421  
CATGCAAC 0.490613280811  
CATGCAAG 0.161383742592  
CATGCACA -0.0404050581976  
CATGCACC -0.172460893521  
CATGCACG -1.07277616424  
CATGCAGA 0.869649195325  
CATGCAGC -1.22845853618  
CATGCAGG 0.226740806676  
CATGCATA -0.188251194179  
CATGCATC -0.360916934843  
CATGCATG -0.445819414196  
CATGCCAA 0.0133683579039  
CATGCCAC -0.52464267984  
CATGCCAG -1.08502618998  
CATGCCCA -0.115600405983  
CATGCCCC 0.124441933461  
CATGCCCG -1.22562752368  
CATGCCGA 0.360473099365  
CATGCCGC -0.914071672403  
CATGCCGG 0.482229328558  
CATGCCTA -0.324467466663  
CATGCCTC -0.456349473364  
CATGCGAA 0.680970195374  
CATGCGAC -0.88022817632  
CATGCGAG -0.340640398469  
CATGCGCA 0.373307272543  
CATGCGCC -0.155857033273  
CATGCGCG -0.0433668064831  
CATGCGGA 0.0585100899428  
CATGCGGC -1.03658712673  
CATGCGGG -0.756798196076  
CATGCGTA 0.26781890432  
CATGCGTC -0.311122008338  
CATGCTAA 0.440626414197  
CATGCTAC 0.386402500922  
CATGCTAG -0.904904346368  
CATGCTCA -0.204957061643  
CATGCTCC -1.05109109558  
CATGCTCG -0.41509608985  
CATGCTGA 0.0928861053277  
CATGCTGC -0.0903221851841  
CATGCTGG -0.0996235778455  
CATGCTTA 0.668910444325  
CATGCTTC -0.601029846627  
CATGGAAA 0.734516905643  
CATGGAAC 0.461170459291  
CATGGAAG -0.813533776819  
CATGGACA -0.0740867999808  
CATGGACC -0.571628868884  
CATGGACG -0.179150485101  
CATGGAGA 0.817957142783  
CATGGAGC -1.01361052181

CATGGAGG -0.569414895944  
CATGGATA 2.94186104193  
CATGGATC 1.91127485398  
CATGGCAA 0.0564179011279  
CATGGCAC -0.276758275454  
CATGGCAG -1.61478838299  
CATGGCCA -1.06695675667  
CATGGCCC -1.12548017  
CATGGCCG -1.53570905841  
CATGGCGA 0.0394309933752  
CATGGCGC -1.34237041048  
CATGGCGG -0.710229403905  
CATGGCTA -0.159403969893  
CATGGCTC -0.5484220191  
CATGGGAA -0.289630128849  
CATGGGAC -0.761968504673  
CATGGGAG -0.94187717402  
CATGGGCA -0.930842075045  
CATGGGCC -1.16481914871  
CATGGGCG -1.05483455222  
CATGGGGA 0.521389066011  
CATGGGGC -0.350451202675  
CATGGGGG -1.35214936345  
CATGGGTA -0.0194889990328  
CATGGGTC -1.17889760174  
CATGGTAA -0.00532144581943  
CATGGTAC -0.580157921197  
CATGGTAG 1.34776909033  
CATGGTCA -0.780632910682  
CATGGTCC 0.581149889326  
CATGGTCG -1.2585313043  
CATGGTGA -0.407727005306  
CATGGTGC -0.798883458843  
CATGGTGG -1.16349451215  
CATGGTTA -0.176733538619  
CATGGTTC -0.269480997405  
CATGTAAG 0.273814430476  
CATGTAAC 0.734133858138  
CATGTAAG 0.232516913229  
CATGTACA 1.34225653711  
CATGTACC -0.613555291844  
CATGTACG 0.308866816156  
CATGTAGA 0.700209588995  
CATGTAGC -0.845812607117  
CATGTAGG 0.528804366069  
CATGTATA 2.84339118652  
CATGTATC 0.841863470618  
CATGTCAA -0.343625879045  
CATGTCAC 0.161258835797  
CATGTCAG -1.06314501764  
CATGTCCA 0.107417970026  
CATGTCCC -0.630962510961  
CATGTCCG -0.376219266289  
CATGTCSA 0.250599253573

CATGTCGC -0.415235985461  
CATGTCGG -0.254865653331  
CATGTCTA 0.240580063197  
CATGTCTC -0.0357549864008  
CATGTGAA 0.194048118531  
CATGTGAC -0.859696413728  
CATGTGAG -0.6242585551  
CATGTGCA 0.446794519908  
CATGTGCC -0.399043693102  
CATGTGCG -0.564668854093  
CATGTGGA 0.112069290891  
CATGTGGC -0.991396264686  
CATGTGGG 0.0796280817593  
CATGTGTA 0.32560994748  
CATGTGTC -1.16768784143  
CATGTTAA 0.300862996915  
CATGTTAC -0.154652307236  
CATGTTAG -0.389214361054  
CATGTTCA 0.381212207237  
CATGTTCC 0.724906993198  
CATGTTCCG 0.132338332858  
CATGTTGA -0.144931435922  
CATGTTGC -0.823411822517  
CATGTTGG -0.31408000942  
CATGTTTA 0.0906379911972  
CATGTTTC -0.769358615195  
CATTAAAA 0.246600154356  
CATTAAAC 1.20824653498  
CATTAAAG 0.742542583572  
CATTAAACA 2.41383338795  
CATTAAACC -0.55993967466  
CATTAAACG 0.0733989798968  
CATTAAAGA 1.84972432448  
CATTAAAGC -0.398991648604  
CATTAAAGG 1.23006129854  
CATTAAATA 1.23545061038  
CATTAAATC 1.35916829261  
CATTAAATG 0.889826847154  
CATTACAA 0.502703217669  
CATTACAC 0.363571620591  
CATTACAG -0.483974692839  
CATTACCA 1.44679040925  
CATTACCC -0.311435940749  
CATTACCG 0.0844873724375  
CATTACGA 0.786458147241  
CATTACGC 0.0538652225958  
CATTACGG 0.126263490887  
CATTACTA 0.924289672761  
CATTACTC 0.117864549819  
CATTAGAA -0.107301806707  
CATTAGAC -0.586032079584  
CATTAGAG 0.366673264487  
CATTAGCA 0.113337927571  
CATTAGCC 0.235198870294

CATTAGCG -0.292272948451  
CATTAGGA 0.147037364484  
CATTAGGC -0.807499945912  
CATTAGGG -0.492535180029  
CATTAGTA 0.548215090177  
CATTAGTC 0.203298299406  
CATTATAA 2.05543020235  
CATTATAC 1.40025013746  
CATTATAG 1.3658776611  
CATTATCA 0.794326442609  
CATTATCC 1.99185264374  
CATTATCG 0.133132948252  
CATTATGA 0.395660176205  
CATTATGC -0.167314733571  
CATTATGG 0.0443448266873  
CATTATTA 3.18414067025  
CATTATTC 2.27074849081  
CATTCAAA 0.313116769853  
CATTCAAC 1.01896007165  
CATTCAAG 0.15677468186  
CATTCACA 1.07266707898  
CATTCACC 0.0825575624561  
CATTCACG -0.732601668121  
CATTCAGA 2.26753380627  
CATTCAGC -0.918177775108  
CATTCAGG 0.281753714539  
CATTCATA 1.57687542352  
CATTCATC 0.18110236195  
CATTCCAA 0.00689839410525  
CATTCCAC 0.620056065985  
CATTCCAG -0.0697704375045  
CATTCCCA 0.323113477006  
CATTCCCC -0.584974327209  
CATTCCCG -0.821340451501  
CATTCCGA 0.406323885643  
CATTCCGC -1.350670467  
CATTCCGG -0.630906719259  
CATTCCCTA -0.676614695435  
CATTCCCTC 0.332220847779  
CATTCGAA -0.0355778269301  
CATTCGAC -0.29254045717  
CATTCGAG 0.492808934088  
CATTCGCA 1.62314048401  
CATTCGCC 0.118109367137  
CATTCGCG 0.170041032548  
CATTCGGA 0.389058019382  
CATTCGGC -0.65581167692  
CATTCGGG -1.01730255849  
CATTCGTA -0.281899230955  
CATTCGTC 0.413817252448  
CATTCTAA 0.295256763604  
CATTCTAC -0.0500293349239  
CATTCTAG 0.728488487364  
CATTCTCA 0.872923626954

CATTCTCC 0.24601309242  
CATTCTCG -0.162686312285  
CATTCTGA 0.832947623597  
CATTCTGC -0.524127855667  
CATTCTGG 0.172018723467  
CATTCTTA 0.552068256622  
CATTCTTC 0.400890440065  
CATTGAAA 1.14838016543  
CATTGAAC 0.392026429363  
CATTGAAG 0.615756565926  
CATTGACA 1.29699364548  
CATTGACC 0.490854350925  
CATTGACG -0.443189085273  
CATTGAGA 0.083025130225  
CATTGAGC -1.35264690885  
CATTGAGG -0.852272370194  
CATTGATA 1.18760422988  
CATTGATC 1.36086244511  
CATTGCAA 0.0639785094242  
CATTGCAC 0.222849543658  
CATTGCAG -0.719931122844  
CATTGCCA 0.164984597311  
CATTGCCC -0.120615830155  
CATTGCCG -0.611396277893  
CATTGCGA 1.71212783191  
CATTGCGC 0.360896741578  
CATTGCGG 0.534377082724  
CATTGCTA 0.367931700446  
CATTGCTC 0.232053092664  
CATTGGAA 1.67282757431  
CATTGGAC 0.351751066054  
CATTGGAG -0.0504879510392  
CATTGGCA -0.914110809866  
CATTGGCC -1.2667493387  
CATTGGCG -1.59804545984  
CATTGGGA 0.487318447739  
CATTGGGC -1.58721937157  
CATTGGGG -0.585258698345  
CATTGGTA 0.0136810412472  
CATTGGTC -0.310733964562  
CATTGTAA 0.285526940636  
CATTGTAC 0.65502705407  
CATTGTAG -0.147539489799  
CATTGTCA 1.19292255303  
CATTGTCC 0.225957016538  
CATTGTCT -0.0408732505005  
CATTGTGA 1.28832115854  
CATTGTGC -0.889196484196  
CATTGTGG 0.419432021058  
CATTGTTA 1.21285268123  
CATTGTTC 0.42675780458  
CATTTAAA 1.00716220852  
CATTTAAC 2.28949949887  
CATTTAAG 1.20359563048



CATTTACA 1.86036742429  
CATTTACC 1.51752575174  
CATTTACG 2.26760146412  
CATTTAGA 1.16057190132  
CATTTAGC -1.16030043722  
CATTTAGG -0.31632187821  
CATTTATA 1.28062232005  
CATTTATC 1.36444477199  
CATTTCAA 0.142443917101  
CATTTCAC 0.589136637971  
CATTTCAG -0.277773559519  
CATTTCCA 0.837764862321  
CATTTCCC -0.474749076967  
CATTTCCG -0.160523967487  
CATTTCGA 1.76124951079  
CATTTCGC -0.462613965485  
CATTTCGG 0.909847324599  
CATTTCTA -0.112136532382  
CATTTCTC 0.964484054831  
CATTTGAA 0.971808172929  
CATTTGAC 1.03307079228  
CATTTGAG 0.277210021696  
CATTTGCA 0.845148519324  
CATTTGCC 0.701030226637  
CATTTGCG -0.523958190604  
CATTTGGA 0.242865441188  
CATTTGGC 0.400991198212  
CATTTGGG -0.74479715122  
CATTTGTA 1.2266034621  
CATTTGTC -0.35747304633  
CATTTTAA 0.462594813109  
CATTTTAC 1.14715482977  
CATTTTAG 0.639608351127  
CATTTTCA 1.42424431641  
CATTTTCC 1.12386720692  
CATTTTCG 0.247621475582  
CATTTTGA 0.492889707148  
CATTTTGC 0.412064810116  
CATTTTGG -0.361753185835  
CATTTTTA 1.41942811857  
CATTTTTTC 0.477567806972  
CCAAAAAA 1.51841779444  
CCAAAAAC -0.275078695419  
CCAAAAAG 0.479929794464  
CCAAAACA 0.702667130185  
CCAAAACC -0.098800858423  
CCAAAACG -0.388628964542  
CCAAAAGA 0.506216013098  
CCAAAAGC -0.577833405743  
CCAAAAGG -0.785817583561  
CCAAAATA 2.28658417427  
CCAAAATC 6.58497381188  
CCAAACAA -1.01435330088  
CCAAACAC -0.372430635021

CCAAACAG -0.0343289671589  
CCAAACCA 0.089978691498  
CCAAACCC -0.423200875417  
CCAAACCG -1.16154742339  
CCAAACGA -0.275652642141  
CCAAACGC 1.4339720576  
CCAAACGG 0.0551176213928  
CCAAACTA 0.470493086108  
CCAAACTC 1.36675284138  
CCAAAGAA 1.29696096154  
CCAAAGAC 0.443972459055  
CCAAAGAG 0.363427561421  
CCAAAGCA -0.698650335838  
CCAAAGCC -0.705885353756  
CCAAAGCG -0.812211013861  
CCAAAGGA -0.0829805801349  
CCAAAGGC -0.666826790808  
CCAAAGGG -1.04757705108  
CCAAAGTA -0.566752091254  
CCAAAGTC 0.474808615872  
CCAAATAA -0.317183735095  
CCAAATAC 0.101381432806  
CCAAATAG 0.492049917131  
CCAAATCA 3.21293585004  
CCAAATCC 3.45762992671  
CCAAATCG 2.92114212733  
CCAAATGA 0.820399486979  
CCAAATGC -0.300672722231  
CCAAATGG -0.26226429915  
CCAAATTA 1.83315169093  
CCAAATTC 2.53605135593  
CCAACAAA 1.22824307196  
CCAACAAC -0.460439338185  
CCAACAAG 0.505049383634  
CCAACACA -0.303778321509  
CCAACACC -0.698530633493  
CCAACACG -0.660247741741  
CCAACAGA -0.398750370312  
CCAACAGC -0.80928194952  
CCAACAGG -1.23523181531  
CCAACATA 1.08674240934  
CCAACATC 0.758091814115  
CCAACCAA -0.12845539696  
CCAACCAC -0.787598129922  
CCAACCAG -0.531512553561  
CCAACCCA -0.115765282953  
CCAACCCC -1.10388211974  
CCAACCCG -1.14936817818  
CCAACCGA -0.75906567076  
CCAACCGC 0.133073201168  
CCAACCGG -0.736206061866  
CCAACCTA 0.705008508056  
CCAACCTC -1.10341205383  
CCAACGAA 0.470032388213

CCAACGAC -0.282561653324  
CCAACGAG -0.00713675790555  
CCAACGCA 0.292991578878  
CCAACGCC -0.477657948042  
CCAACGCG 0.253609507331  
CCAACGGA -0.19873940957  
CCAACGGC -0.794840642248  
CCAACGGG -1.11228293441  
CCAACGTA 0.057373021753  
CCAACGTC -0.842833163702  
CCAACCTAA -0.0272198969262  
CCAACCTAC -0.466515012868  
CCAACCTAG -0.553583584222  
CCAACCTCA -0.166794288592  
CCAACCTCC -0.266532780689  
CCAACCTCG 0.684637042517  
CCAACCTGA -0.207914854546  
CCAACCTGC -0.375848709464  
CCAACCTGG -0.880753201215  
CCAACCTTA 0.447670116541  
CCAACCTTC 0.61147954909  
CCAAGAAA -0.152422512769  
CCAAGAAC -0.550178000459  
CCAAGAAG 0.778213049708  
CCAAGACA 0.827361791728  
CCAAGACC -1.03503474345  
CCAAGACG 0.671572208124  
CCAAGAGA -0.534598167751  
CCAAGAGC -0.782899552654  
CCAAGAGG -1.20059557744  
CCAAGATA 1.95716831675  
CCAAGATC 2.83624610149  
CCAAGCAA 0.407764060989  
CCAAGCAC -1.3042892432  
CCAAGCAG -0.507646612256  
CCAAGCCA -0.750531205819  
CCAAGCCC -0.437865765852  
CCAAGCCG -1.57431941414  
CCAAGCGA -0.162613658166  
CCAAGCGC -0.716982073416  
CCAAGCGG -1.16577989014  
CCAAGCTA 0.0765562073163  
CCAAGCTC -0.364563796899  
CCAAGGAA -0.315320958427  
CCAAGGAC -1.09504621307  
CCAAGGAG -0.967129164392  
CCAAGGCA 0.464753618881  
CCAAGGCC -0.711128941006  
CCAAGGCG 0.120548380486  
CCAAGGGA 0.0844873724375  
CCAAGGGC -1.53434757435  
CCAAGGGG -1.40485003836  
CCAAGGTA -0.500379118572  
CCAAGGTC -0.205984420031

CCAAGTAA 0.37319673003  
CCAAGTAC -0.0485421113524  
CCAAGTAG -0.624431551011  
CCAAGTCA 0.212924241556  
CCAAGTCC -0.394453992923  
CCAAGTCG -0.993984125299  
CCAAGTGA -0.493332709914  
CCAAGTGC 0.336770369606  
CCAAGTGG -0.376979532314  
CCAAGTTA 0.130487422335  
CCAAGTTC -0.70961007438  
CCAATAAA 1.46491771604  
CCAATAAC 0.172604952691  
CCAATAAG 2.19347073858  
CCAATACA 0.874049037176  
CCAATACC 0.137682678257  
CCAATACG 0.267330935108  
CCAATAGA 0.716906712983  
CCAATAGC -0.143202517702  
CCAATAGG -0.296626574788  
CCAATATA 2.68509971981  
CCAATATC 2.76922236441  
CCAATCAA 0.440806071804  
CCAATCAC 0.404393451128  
CCAATCAG -0.265525615566  
CCAATCCA 0.421878528814  
CCAATCCC 0.320678419039  
CCAATCCG -0.101200734309  
CCAATCGA 0.453232216118  
CCAATCGC 0.712052002221  
CCAATCGG 1.49391607754  
CCAATCTA 1.53517903725  
CCAATCTC 2.17801269  
CCAATGAA 0.00334791845975  
CCAATGAC -0.310733964562  
CCAATGAG -0.848473538205  
CCAATGCA 0.286605927166  
CCAATGCC -0.548671416334  
CCAATGCG 0.156344586129  
CCAATGGA -0.998368978334  
CCAATGGC -0.494354447497  
CCAATGGG -1.18065129314  
CCAATGTA -0.288652525  
CCAATGTC -0.566053862271  
CCAATTAA 1.35441683813  
CCAATTAC 0.605148023656  
CCAATTAG 0.631875163276  
CCAATTCA 0.513446659278  
CCAATTCC 0.770933065345  
CCAATTCCG -0.639032322625  
CCAATTGA 0.120017734786  
CCAATTGC 0.589533841579  
CCAATTGG 0.359995955409  
CCAATTTA 0.200280967597

CCAATTC 1.04398847886  
CCACAAAA 1.30654089635  
CCACAAAC -0.490590381232  
CCACAAAG 0.179600565919  
CCACAACA 0.477358171734  
CCACAACC -0.144169504473  
CCACAACG -0.825467372005  
CCACAAGA -0.746181534864  
CCACAAGC -0.948676267223  
CCACAAGG -0.918361596275  
CCACAATA 1.25460506738  
CCACAATC 6.79856359848  
CCACACAA 1.30576022889  
CCACACAC -0.801694694441  
CCACACAG 0.636667004285  
CCACACCA 0.0298414823735  
CCACACCC -0.293343607862  
CCACACCG -0.891783720274  
CCACACGA -0.354010629974  
CCACACGC -0.48214522465  
CCACACGG -0.427554709931  
CCACACTA -0.459296441012  
CCACACTC 0.830471970921  
CCACAGAA 1.09068696592  
CCACAGAC -0.69305409507  
CCACAGAG 0.458138971379  
CCACAGCA 0.530894473104  
CCACAGCC -1.47663168344  
CCACAGCG -0.20207171468  
CCACAGGA 0.192721608369  
CCACAGGC -1.13864159898  
CCACAGGG -1.01708938422  
CCACAGTA 0.200163347032  
CCACAGTC -0.101303574237  
CCACATAA -0.0958114224647  
CCACATAC -0.213637459355  
CCACATAG -0.0813022491672  
CCACATCA 1.45388386613  
CCACATCC -0.0866095388832  
CCACATCG -0.600573936826  
CCACATGA 0.0193547242283  
CCACATGC -0.207574691708  
CCACATGG -0.395471150589  
CCACATTA -0.560682661911  
CCACATTC 1.51685916581  
CCACCAA 0.0512838155009  
CCACCAAC -0.948569263735  
CCACCAAG 0.495003338296  
CCACCACA 0.406770635613  
CCACCACC -1.48508266901  
CCACCACG -0.591312097983  
CCACCAGA -0.755981305637  
CCACCAGC -0.970064057716  
CCACCAGG -1.17430686067

CCACCATA 0.0774871792944  
CCACCATC 0.0768426602327  
CCACCCAA 0.165118872116  
CCACCCAC -0.59969042943  
CCACCCAG -1.06899752552  
CCACCCCA 0.607665936463  
CCACCCCC -1.78160244849  
CCACCCCG -1.402134981  
CCACCCGA -0.565933119036  
CCACCCGC -0.903827441618  
CCACCCGG -0.754952073647  
CCACCCTA -0.700509781659  
CCACCCTC -0.600775036766  
CCACCGAA -0.349031220595  
CCACCGAC -0.278537989104  
CCACCGAG 0.155076782161  
CCACCGCA -0.213335809446  
CCACCGCC -1.41587764293  
CCACCGCG -0.812129408088  
CCACCGGA -0.0304564401605  
CCACCGGC -1.66053549662  
CCACCGGG -1.13961170842  
CCACCGTA 0.161330865382  
CCACCGTC -0.385008541091  
CCACCTAA -0.284233322596  
CCACCTAC 0.245314863436  
CCACCTAG -0.534418718322  
CCACCTCA -0.149687886672  
CCACCTCC -1.44345498147  
CCACCTCG -0.960116480569  
CCACCTGA -1.00735623041  
CCACCTGC -1.18977448544  
CCACCTGG -1.27056357586  
CCACCTTA -0.0334579504423  
CCACCTTC -0.862819291779  
CCACGAAA 0.341578864854  
CCACGAAC -0.520826777255  
CCACGAAG -0.0290841308403  
CCACGACA 0.436046290206  
CCACGACC -1.19024392681  
CCACGACG -1.18439912152  
CCACGAGA -0.310672135698  
CCACGAGC -0.609872414995  
CCACGAGG -0.914077085031  
CCACGATA 2.49508275991  
CCACGATC 2.86017741068  
CCACGCAA 0.399361164539  
CCACGCAC -0.644912518173  
CCACGCAG -0.710551038902  
CCACGCCA 0.282188182008  
CCACGCCC -0.96672092735  
CCACGCCG -1.10141021427  
CCACGCGA -0.185603586482  
CCACGCGC 0.250494956399

CCACGCGG -0.687935622792  
CCACGCTA 0.202789096039  
CCACGCTC -0.684828982625  
CCACGGAA -0.517264227286  
CCACGGAC -0.126859712655  
CCACGGAG -1.15567597132  
CCACGGCA 0.329876555417  
CCACGGCC -1.04517363617  
CCACGGCG -0.559424225953  
CCACGGGA -0.719767494943  
CCACGGGC -1.42943669187  
CCACGGGG -2.03012554295  
CCACGGTA -0.910409821532  
CCACGGTC -0.760540403652  
CCACGTAA 0.68126913897  
CCACGTAC -0.486701408172  
CCACGTAG -0.680169542818  
CCACGTCA 0.498317948277  
CCACGTCC -0.988947466972  
CCACGTCCG -0.569891831723  
CCACGTGA 0.685089205114  
CCACGTGC 0.298930896976  
CCACGTGG 0.536151800102  
CCACGTTA -0.707694836858  
CCACGTTC -0.70209859609  
CCACTAAA 0.678050290865  
CCACTAAC 0.770555846824  
CCACTAAG 1.91951474707  
CCACTACA 0.387774185708  
CCACTACC -0.618103980958  
CCACTACG -0.858635330505  
CCACTAGA -0.0190584869464  
CCACTAGC -0.577877123122  
CCACTAGG -0.218795693629  
CCACTATA 1.07017789473  
CCACTATC 1.53387542666  
CCACTCAA 0.541533409361  
CCACTCAC -0.767142976831  
CCACTCAG -1.04035410749  
CCACTCCA -0.478484414669  
CCACTCCC -1.47703076065  
CCACTCCG -1.52525186154  
CCACTCGA -1.16943029122  
CCACTCGC -0.0778154759871  
CCACTCGG -0.714704189833  
CCACTCTA 0.381798436462  
CCACTCTC -0.983251717124  
CCACTGAA 0.112652189267  
CCACTGAC -0.626290580475  
CCACTGAG -1.06913804566  
CCACTGCA -0.14761193574  
CCACTGCC -1.16768784143  
CCACTGCG -0.434253877699  
CCACTGGA 0.213183631334

CCACTGGC -1.21260994569  
CCACTGGG -1.68839991261  
CCACTGTA -0.724990264394  
CCACTGTC 0.214823865729  
CCACTTAA -0.0362725168878  
CCACTTAC -0.750606358074  
CCACTTAG 0.115714487523  
CCACTTCA 0.743272039254  
CCACTTCC -0.479001736978  
CCACTTCG -0.931606920985  
CCACTTGA 0.327609288911  
CCACTTGC -1.02976409306  
CCACTTTA -0.668698935485  
CCACTTTC 0.746345370943  
CCAGAAAA 2.87195570509  
CCAGAAAC -0.878714305966  
CCAGAAAG -0.536454699079  
CCAGAACA 0.211745537768  
CCAGAACC -0.900766184253  
CCAGAACG -0.755044296497  
CCAGAAGA -0.680103550395  
CCAGAAGC -1.34424109791  
CCAGAAGG -1.19350066331  
CCAGAATA 1.08878005552  
CCAGAATC 8.35163324414  
CCAGACAA 0.351244985357  
CCAGACAC -0.730289226991  
CCAGACAG -0.311232342673  
CCAGACCA -0.674893063445  
CCAGACCC -1.05126346696  
CCAGACCG -1.66870065381  
CCAGACGA -0.387469413129  
CCAGACGC -0.388202407837  
CCAGACGG -0.885846900312  
CCAGACTA -1.00661532493  
CCAGACTC -0.95548743475  
CCAGAGAA 0.16458468739  
CCAGAGAC -0.419690994479  
CCAGAGAG -1.05540724988  
CCAGAGCA -1.02743812036  
CCAGAGCC -1.27620415854  
CCAGAGCG -1.14411543109  
CCAGAGGA 0.100203769908  
CCAGAGGC -1.88345540444  
CCAGAGGG -1.0202507752  
CCAGAGTA -0.292212576834  
CCAGAGTC -1.04796051494  
CCAGATAA 1.65056356265  
CCAGATAC 6.1369928856  
CCAGATAG 1.12082531011  
CCAGATCA 0.737002342684  
CCAGATCC 4.60109022166  
CCAGATCG 2.42432139516  
CCAGATGA -0.285631862343



CCAGATGC 1.21738638152  
CCAGATGG -0.422115019013  
CCAGATTA 3.95104465875  
CCAGATTC 10.2079944912  
CCAGCAAA 1.61750260764  
CCAGCAAC -0.7738875274  
CCAGCAAG -0.213905592608  
CCAGCACA 0.451428978356  
CCAGCACC -1.22582570912  
CCAGCACG -0.920303272402  
CCAGCAGA -0.648457373013  
CCAGCAGC -0.659457289907  
CCAGCAGG -1.29263460652  
CCAGCATA 0.0618898596352  
CCAGCATC 0.20973037481  
CCAGCCAA -0.193174187322  
CCAGCCAC -0.737677047554  
CCAGCCAG -0.600984047469  
CCAGCCCA -1.03230469727  
CCAGCCCC -1.30020937092  
CCAGCCCG -1.29673279846  
CCAGCCGA -0.542976915554  
CCAGCCGC 1.46424884015  
CCAGCCGG -1.3132383987  
CCAGCCTA -0.834955916681  
CCAGCCTC -1.20641748315  
CCAGCGAA 0.157328851673  
CCAGCGAC 0.0511426708226  
CCAGCGAG -0.529698074186  
CCAGCGCA 0.515795531556  
CCAGCGCC -1.49416276846  
CCAGCGCG -0.901830390145  
CCAGCGGA -0.413443364776  
CCAGCGGC -1.24189954821  
CCAGCGGG -1.06718096437  
CCAGCGTA -0.612953032914  
CCAGCGTC 0.805627176701  
CCAGCTAA -0.259986415567  
CCAGCTAC -0.869442890935  
CCAGCTAG -0.802495346996  
CCAGCTCA -0.113231548618  
CCAGCTCC -0.773742635518  
CCAGCTCG -0.841781448489  
CCAGCTGA -0.873616235132  
CCAGCTGC -0.861927873619  
CCAGCTGG -1.01592920828  
CCAGCTTA -0.283354395116  
CCAGCTTC -0.844569784508  
CCAGGAAA 1.61789814582  
CCAGGAAC -0.589264042902  
CCAGGAAG 0.189219430017  
CCAGGACA -0.692004461637  
CCAGGACC -0.916988037886  
CCAGGACG -0.359862305138

CCAGGAGA -0.0265283296384  
CCAGGAGC -0.72986641749  
CCAGGAGG -1.13952094282  
CCAGGATA 1.19843323264  
CCAGGATC 1.53549380237  
CCAGGCAA -0.942635774621  
CCAGGCAC -1.12464204541  
CCAGGCAG -1.43471067311  
CCAGGCCA -1.12093814258  
CCAGGCCC -1.44711808141  
CCAGGCCG -1.44562544521  
CCAGGCCGA -0.544328407075  
CCAGGCCG -1.07062318746  
CCAGGCCG -1.09493088246  
CCAGGCTA -1.11361652262  
CCAGGCTC -0.0184495663211  
CCAGGGAA -0.562606434731  
CCAGGGAC -0.565927290052  
CCAGGGAG -1.79746061517  
CCAGGGCA -1.04758662727  
CCAGGGCC -1.68208150239  
CCAGGGCG -0.379688344339  
CCAGGGGA -1.07996954656  
CCAGGGGC -1.24213624658  
CCAGGGGG -1.71762040004  
CCAGGGTA -1.26277667809  
CCAGGGTC -1.22495344334  
CCAGGTAA 0.294833537747  
CCAGGTAC -0.0381228028765  
CCAGGTAG -0.81885397357  
CCAGGTCA -0.765874756506  
CCAGGTCC -1.71818477057  
CCAGGTCC -0.67571661558  
CCAGGTGA -0.624431551011  
CCAGGTGC -1.2093559155  
CCAGGTTA -0.662969877158  
CCAGGTTC -0.704001759289  
CCAGTAAA 1.67649296421  
CCAGTAAC 0.241070114189  
CCAGTAAG -0.190707278123  
CCAGTACA 0.00463154395551  
CCAGTACC -1.29635474723  
CCAGTACG -0.63515729749  
CCAGTAGA 0.600264167974  
CCAGTAGC -0.402225693702  
CCAGTAGG -0.24699152898  
CCAGTATA -0.934445219722  
CCAGTATC 1.35609558546  
CCAGTCAA 1.04884069149  
CCAGTCAC -0.62146210014  
CCAGTCAG -0.097278660949  
CCAGTCCA -0.712741904085  
CCAGTCCC -1.0138763651  
CCAGTCCG -1.26955724345

CCAGTCGA 0.137927495575  
CCAGTCGC -0.152715002847  
CCAGTCGG -0.79075244285  
CCAGTCTA -0.932466487913  
CCAGTCTC -0.065728245443  
CCAGTGAA -0.067741951155  
CCAGTGAC -0.365428360098  
CCAGTGAG -0.508234506904  
CCAGTGCA -0.187198646253  
CCAGTGCC -1.0080269799  
CCAGTGCG 0.14084573466  
CCAGTGGA 0.152341115174  
CCAGTGGC -1.04983370051  
CCAGTGGG -1.40724200348  
CCAGTGTA -0.690077357969  
CCAGTGTC -1.04760640418  
CCAGTTAA -0.646913108672  
CCAGTTAC 0.554499983741  
CCAGTTAG 0.526163628246  
CCAGTTCA -0.201888518048  
CCAGTTCC -1.29268498559  
CCAGTTCG -0.648299782274  
CCAGTTGA 0.379733727142  
CCAGTTGC -0.953643810457  
CCAGTTTA -0.0810921975737  
CCAGTTTC 0.345254455473  
CCATAAAA 0.983069561381  
CCATAAAC 0.964431177622  
CCATAAAG -0.433367872167  
CCATAACA 0.275298739556  
CCATAACC -0.773137253919  
CCATAACG 0.0234491689657  
CCATAAGA 1.02517772373  
CCATAAGC -0.830996995816  
CCATAAGG -0.290699331013  
CCATAATA 1.22387299956  
CCATAATC 3.87574418108  
CCATACAA 0.697172272099  
CCATACAC -0.928389946482  
CCATACAG -0.607333892567  
CCATACCA -0.400186382097  
CCATACCC -0.478778361993  
CCATACCG -0.42749475467  
CCATACGA 0.60528125757  
CCATACGC -0.629707197672  
CCATACGG -0.781043854037  
CCATACTA 0.988323141175  
CCATACTC 0.494289912319  
CCATAGAA 0.607775229909  
CCATAGAC 0.172093667544  
CCATAGAG -0.535394448569  
CCATAGCA -0.206610827607  
CCATAGCC -0.676535795976  
CCATAGCG -0.522767412492

CCATAGGA 0.481740734812  
CCATAGGC -0.941682527597  
CCATAGGG -0.766164956627  
CCATAGTA 0.22783290842  
CCATAGTC -0.273045837332  
CCATATAA 1.07665452023  
CCATATAC 0.508657940939  
CCATATAG -0.726210395603  
CCATATCA 2.68222894531  
CCATATCC 4.61204912749  
CCATATCG 2.38286441357  
CCATATGA 0.647538059003  
CCATATGC 1.08062031096  
CCATATGG -0.446607992428  
CCATATTA 1.40273619904  
CCATATTC 1.86217961371  
CCATCAAA 0.984006154165  
CCATCAAC -0.313955102625  
CCATCAAG -0.568055285481  
CCATCACA -0.244597898433  
CCATCACC -0.991408963544  
CCATCACG -0.490629726872  
CCATCAGA -0.153523774344  
CCATCAGC -1.07500845685  
CCATCAGG -0.591969107724  
CCATCATA 0.152989173262  
CCATCATC 1.33558776333  
CCATCCAA 0.966871856394  
CCATCCAC -0.500449066377  
CCATCCAG -0.994346563182  
CCATCCCA -1.12858847559  
CCATCCCC -0.844664297316  
CCATCCCG -0.838140415417  
CCATCCGA -1.04473458879  
CCATCCGC 0.335001897568  
CCATCCGG -1.16004937456  
CCATCCTA -0.487661941425  
CCATCCTC -0.581182573271  
CCATCGAA 1.11632242016  
CCATCGAC 0.46203710427  
CCATCGAG -0.569474226672  
CCATCGCA 0.517888969439  
CCATCGCC -0.0381806763581  
CCATCGCG -0.188356115886  
CCATCGGA -0.122026652404  
CCATCGGC -0.921441589659  
CCATCGGG -1.1395646602  
CCATCGTA 0.850339229365  
CCATCGTC 0.0389892396772  
CCATCTAA 0.279815993794  
CCATCTAC 0.120064366656  
CCATCTAG -0.868672840545  
CCATCTCA 0.203845391168  
CCATCTCC -0.223520709503

CCATCTCG -0.179127585522  
CCATCTGA -0.100002045434  
CCATCTGC -0.222197946545  
CCATCTTA -0.3981980741  
CCATCTTC 0.646835250103  
CCATGAAA 1.46393449138  
CCATGAAC 0.0769151061737  
CCATGAAG -0.511586172567  
CCATGACA -0.69709337264  
CCATGACC -1.33686660074  
CCATGACG -0.287963455848  
CCATGAGA 0.101218637617  
CCATGAGC -0.326870257041  
CCATGAGG -0.612006655765  
CCATGATA 1.04884069149  
CCATGATC 0.161302344997  
CCATGCAA -0.366486528829  
CCATGCAC -0.570753272251  
CCATGCAG -1.34237041048  
CCATGCCA -0.629310618598  
CCATGCCC -0.612327666228  
CCATGCCG 2.14320886884  
CCATGCGA 0.305056534377  
CCATGCGC -0.142842577955  
CCATGCGG -1.19877589362  
CCATGCTA -0.212248703974  
CCATGCTC -0.393695808677  
CCATGGAA 0.215129887377  
CCATGGAC -0.539249488616  
CCATGGAG -1.07545499864  
CCATGGCA -1.39347061299  
CCATGGCC -1.44655266998  
CCATGGCG -0.0200408788884  
CCATGGGA -0.790078362513  
CCATGGGC -1.16481914871  
CCATGGGG -1.25131439787  
CCATGGTA -1.12886285419  
CCATGGTC -1.56731047753  
CCATGTAA 0.709506818097  
CCATGTAC -0.358924671464  
CCATGTAG -0.363548304656  
CCATGTCA -0.118912517829  
CCATGTCC -0.630962510961  
CCATGTGC -0.310672343876  
CCATGTGA -0.311564802926  
CCATGTGC -1.07193137795  
CCATGTTA 0.0713467612563  
CCATGTTT 0.189256902056  
CCATTAAC 1.4201504962  
CCATTAAC 1.68584536048  
CCATTAAG 1.30469706388  
CCATTACA 0.628832017396  
CCATTACC -0.233450383343  
CCATTACG 0.385043098638

CCATTAGA 0.566398605025  
CCATTAGC 0.146188414634  
CCATTAGG 0.0365997726905  
CCATTATA 0.890797164772  
CCATTATC 1.78456690309  
CCATTCAA 0.580628611636  
CCATTCAC 0.034768430899  
CCATTCAG -0.978114717005  
CCATTCCA 0.0999843503048  
CCATTCCC -0.8450598355  
CCATTCCG -0.159173725034  
CCATTCGA 0.0311919330046  
CCATTCGC 0.470588847984  
CCATTCGG -0.147645244219  
CCATTCTA -0.249621857903  
CCATTCTC 0.107412349221  
CCATTGAA 1.84375211426  
CCATTGAC -0.000633485628218  
CCATTGAG -1.17476755857  
CCATTGCA -0.714255358083  
CCATTGCC -0.0211458876674  
CCATTGCG 0.143953415717  
CCATTGGA -0.193794141381  
CCATTGGC -1.78040563321  
CCATTGGG -0.506907996742  
CCATTGTA 0.144566916258  
CCATTGTC 0.538928269975  
CCATTTAA 1.18723450577  
CCATTTAC 0.907070230192  
CCATTTAG -0.934852624051  
CCATTTCA -0.783183091078  
CCATTTCC -0.832981348431  
CCATTTCG -0.13548077964  
CCATTTGA 0.17430493417  
CCATTTGC 0.581309978202  
CCATTTTA -0.376684752278  
CCATTTTC 0.663579005962  
CCCAAAA 1.12615758119  
CCCAAAAC -0.818338941219  
CCCAAAAG -0.446500156228  
CCCAAACA -0.15396261355  
CCCAAACC -1.12273596772  
CCCAAACG 1.39107490066  
CCCAAAGA 0.750466254286  
CCCAAAGC -1.22825056637  
CCCAAAGG -0.99911154923  
CCCAAATA 1.5159483871  
CCCAAATC 4.8659217718  
CCCAACAA -0.107344066839  
CCCAACAC -0.992536871902  
CCCAACAG -0.791827057642  
CCCAACCA -1.02332244147  
CCCAACCC -1.03441125036  
CCCAACCG 0.184116362911

CCCAACGA 0.743397362405  
CCCAACGC 0.143257476692  
CCCAACGG -0.971754879364  
CCCAACTA -0.69880563662  
CCCAACTC -0.503803646532  
CCCAAGAA -0.367303419267  
CCCAAGAC -0.536324171479  
CCCAAGAG -0.589328994436  
CCCAAGCA -1.18612283529  
CCCAAGCC -1.5149391402  
CCCAAGCG -1.25436607905  
CCCAAGGA -0.409755908012  
CCCAAGGC -0.440661179922  
CCCAAGGG -1.5916960311  
CCCAAGTA -0.116463511936  
CCCAAGTC -1.0853684346  
CCCAATAA 0.680647519487  
CCCAATAC -0.239005404869  
CCCAATAG -0.206634976254  
CCCAATCA 0.712279332588  
CCCAATCC 0.354029574172  
CCCAATCG 1.50295683136  
CCCAATGA -0.127600826305  
CCCAATGC -0.836696909224  
CCCAATTA 0.806845642485  
CCCAATTC 0.171454977466  
CCCACAAA -0.889343457858  
CCCACAAC -0.228630854661  
CCCACAAG -0.826421243562  
CCCACACA -0.274942338834  
CCCACACC -0.861848557805  
CCCACACG 0.3805693536  
CCCACAGA -0.613940629306  
CCCACAGC -0.938426207454  
CCCACAGG -1.50146294609  
CCCACATA -0.355244917286  
CCCACATC -0.00642478917452  
CCCACCAA 0.0916162195794  
CCCACCAC -0.290658111771  
CCCACCAG -0.728931906486  
CCCACCCA -0.69233171744  
CCCACCCC -1.62546375039  
CCCACCCG 0.0964330419474  
CCCACCGA 0.662650532119  
CCCACCGC -0.605478610306  
CCCACCGG -0.899300611192  
CCCACCTA -0.879879270007  
CCCACCTC -0.891830352144  
CCCACGAA -0.294225033478  
CCCACGAC -0.249895195606  
CCCACGAG -0.506847416946  
CCCACGCA -1.02819984363  
CCCACGCC -0.976189695117  
CCCACGCG 1.12197216267

CCCACGGA 0.0221509710105  
CCCACGGC -0.448367929168  
CCCACGGG -1.72465098717  
CCCACGTA -0.206310218588  
CCCACGTC -1.0110055906  
CCCCTAA 0.00546050871777  
CCCCTAC -0.837663271461  
CCCCTAG -0.141198388178  
CCCCTCA -0.803143196906  
CCCCTCC -1.57378856027  
CCCCTCG -0.884565772952  
CCCCTGA -0.395646020102  
CCCCTGC -0.669502086177  
CCCCTTA -0.914444727364  
CCCCTTC -0.479617943833  
CCCAGAAA 0.355342552764  
CCCAGAAC -0.437463357794  
CCCAGAAG -0.473084485746  
CCCAGACA -0.533279984709  
CCCAGACC -1.15733452538  
CCCAGACG 0.0226229105173  
CCCAGAGA -0.252822178167  
CCCAGAGC -0.94187717402  
CCCAGAGG -1.06830387645  
CCCAGATA 3.47552948677  
CCCAGATC 3.39521608307  
CCCAGCAA -0.245390223869  
CCCAGCAC -1.01697530268  
CCCAGCAG -0.885864387263  
CCCAGCCA -0.851338067368  
CCCAGCCC -0.904387232237  
CCCAGCCG -0.919124152258  
CCCAGCGA -0.255863658623  
CCCAGCGC -1.04642062234  
CCCAGCGG -1.10285205504  
CCCAGCTA -0.610183641093  
CCCAGCTC -0.474685374501  
CCCAGGAA -0.456174603851  
CCCAGGAC -1.3483813418  
CCCAGGAG -0.310701072439  
CCCAGGCA -1.23002445103  
CCCAGGCC -1.23995849661  
CCCAGGCG -0.74071436445  
CCCAGGGA -1.14864288605  
CCCAGGGC -1.02024598711  
CCCAGGGG -1.65818995519  
CCCAGGTA -0.840294224918  
CCCAGGTC -1.25245625416  
CCCAGTAA 0.241070114189  
CCCAGTAC -1.35605145172  
CCCAGTAG 0.578698593476  
CCCAGTCA -0.84613778114  
CCCAGTCC -1.50995244459  
CCCAGTCG -0.251803355076



CCCAGTGA -0.36154230153  
CCCAGTGC -0.764753509844  
CCCAGTTA -0.261215082073  
CCCAGTTC -1.09578815943  
CCCATAAA 0.937617852313  
CCCATAAC -0.269274693015  
CCCATAAG 0.688078224717  
CCCATACA 0.0804430985961  
CCCATACC -0.54061825891  
CCCATACG -0.719949442508  
CCCATAGA 0.628243498214  
CCCATAGC -1.06483396569  
CCCATAGG -0.773735765645  
CCCATATA -0.104472459624  
CCCATATC 2.83367760143  
CCCATCAA -0.0904333522315  
CCCATCAC -0.833372306699  
CCCATCAG -0.219977936443  
CCCATCCA -0.758144274969  
CCCATCCC -0.853788114151  
CCCATCCG -0.159734972899  
CCCATCGA 0.75855563468  
CCCATCGC 1.16913967474  
CCCATCGG -0.869706652451  
CCCATCTA 0.231703353638  
CCCATCTC 0.00154926061295  
CCCATGAA -0.0859389975725  
CCCATGAC -1.34764397536  
CCCATGAG -0.502383456274  
CCCATGCA -1.07238624687  
CCCATGCC -0.607382814395  
CCCATGCG -1.00600057533  
CCCATGGA -1.03637749149  
CCCATGGC -1.36341470728  
CCCATGGG -1.17252527342  
CCCATGTA -0.5282932891  
CCCATGTC -0.00325257293963  
CCCATTAA 0.89007499532  
CCCATTAC -0.54061825891  
CCCATTAG 0.821632733401  
CCCATTCA -0.081599943695  
CCCATTCC -1.03974227237  
CCCATTCCG 0.513417306181  
CCCATTGA 0.710257091578  
CCCATTGC 0.11115205866  
CCCATTTA -0.482506205287  
CCCATTTTC -0.570736201656  
CCCCAAAA -1.25904508759  
CCCCAAAC -0.382297230929  
CCCCAAAG -0.639002553172  
CCCCAACA -0.836268478918  
CCCCAACC -0.819029675795  
CCCCAACG 0.18110236195  
CCCCAAGA -0.75941082987

CCCCAAGC -1.28612529708  
CCCCAAGG -1.21773591237  
CCCCAATA -0.17827988474  
CCCCAATC 1.2983640812  
CCCCACAA -1.06862176425  
CCCCACAC -0.566744388669  
CCCCACAG -0.852260712227  
CCCCACCA -1.21863815579  
CCCCACCC -1.32497755564  
CCCCACCG -0.662969877158  
CCCCACGA 0.383546298878  
CCCCACGC -0.160390733572  
CCCCACGG -1.10691485672  
CCCCACTA -1.10391209737  
CCCCACTC -0.9983891716  
CCCCAGAA -1.0245196731  
CCCCAGAC -0.913133830551  
CCCCAGAG -0.580669206344  
CCCCAGCA -1.11099764349  
CCCCAGCC -1.285180169  
CCCCAGCG -0.324248255238  
CCCCAGGA -0.666078390928  
CCCCAGGC -1.58443582364  
CCCCAGGG -1.26063098753  
CCCCAGTA 0.484846750446  
CCCCAGTC -0.640062387327  
CCCCATAA 0.285295654887  
CCCCATAC -0.603328339832  
CCCCATAG -0.75727450732  
CCCCATCA -0.35027654134  
CCCCATCC -0.525047794212  
CCCCATCG 1.24799291802  
CCCCATGA -0.139715328166  
CCCCATGC -0.456349473364  
CCCCATTA -0.0591546090045  
CCCCATTC -0.294893701186  
CCCCCAA -1.70532894688  
CCCCCAAC -1.13611036278  
CCCCCAAG -1.64022023914  
CCCCCACA -1.13864159898  
CCCCCACC -2.02764739214  
CCCCCACG 0.486208442688  
CCCCCAGA -1.13201425262  
CCCCCAGC -1.26019214832  
CCCCCAGG -1.29073685595  
CCCCCATA -0.391591129183  
CCCCCATC 0.451240369095  
CCCCCCAA -1.62593922892  
CCCCCCAC -1.16814749843  
CCCCCCAG -1.11970010807  
CCCCCCCA -1.35106100891  
CCCCCCCC -0.563408960888  
CCCCCCCCG -1.1148331148  
CCCCCCGA -0.561549723246

CCCCCGC -0.870468167544  
CCCCCGG -1.42773129777  
CCCCCCTA -1.39224756729  
CCCCCCTC -1.43140938652  
CCCCCGAA -0.467521553457  
CCCCCGAC -1.0063621805  
CCCCCGAG 0.0307574655362  
CCCCCGCA -1.13951386477  
CCCCCGCC -1.308207153  
CCCCCGCG 0.024768601076  
CCCCCGGA -0.693883059832  
CCCCCGGC -0.932839959229  
CCCCCGGG -1.7224070366  
CCCCCGTA -0.742705378761  
CCCCCGTC -1.26907676864  
CCCCCTAA -1.38602783344  
CCCCCTAC -0.813624958779  
CCCCCTAG -0.726173131742  
CCCCCTCA -1.05662946287  
CCCCCTCC -1.9589877924  
CCCCCTCG -1.08261548884  
CCCCCTGA -1.02547645915  
CCCCCTGC -0.964429512198  
CCCCCTTA -0.988728047369  
CCCCCTTC -1.44730398435  
CCCCGAAA -1.19467312176  
CCCCGAAC 1.54766180597  
CCCCGAAG -0.365883229009  
CCCCGACA -0.968179630537  
CCCCGACC -1.64842286836  
CCCCGACG 0.941571152372  
CCCCGAGA -0.824920904777  
CCCCGAGC -1.03387019576  
CCCCGAGG -1.57096441763  
CCCCGATA 1.81070593988  
CCCCGATC 0.656522188405  
CCCCGCAA -0.0160528131047  
CCCCGCAC -0.280875619771  
CCCCGCAG -0.11307270881  
CCCCGCCA -0.895237601332  
CCCCGCCC -0.924638370897  
CCCCGCCG -0.722214835411  
CCCCGCGA 0.478910555017  
CCCCGCGC 0.0848033866287  
CCCCGCGG -0.862168943733  
CCCCGCTA -0.328057287949  
CCCCGCTC -0.0878835881913  
CCCCGGAA -0.869971454856  
CCCCGGAC -1.45642696847  
CCCCGGAG -1.47111850569  
CCCCGGCA -0.810280787523  
CCCCGGCC -1.30000702191  
CCCCGGCG -0.0767306604732  
CCCCGGGA -0.951290150084

CCCCGGGC -0.538450709662  
CCCCGGGG -1.19144303204  
CCCCGGTA -0.895178270604  
CCCCGGTC -0.90962957042  
CCCCGTAA -0.676294101328  
CCCCGTAC -0.700819134154  
CCCCGTAG -0.496171841363  
CCCCGTCA 0.0334610731122  
CCCCGTCC -1.30338366893  
CCCCGTCCG -1.25698745632  
CCCCGTGA -1.06975799972  
CCCCGTGC -0.483070784  
CCCCGTTA -0.417301735671  
CCCCGTTC -0.746170709608  
CCCCTAAA -0.845628994129  
CCCCTAAC -0.767081356145  
CCCCTAAG -0.737040439256  
CCCCTACA -0.406970902841  
CCCCTACC -1.26190378777  
CCCCTACG 0.398082743493  
CCCCTAGA -0.228729739207  
CCCCTAGC -0.198037017026  
CCCCTAGG -1.28055924212  
CCCCTATA -0.32901907027  
CCCCTATC -0.124401963287  
CCCCTCAA -1.00920485097  
CCCCTCAC -0.730803842986  
CCCCTCAG -0.800182905866  
CCCCTCCA -0.877367394361  
CCCCTCCC -2.06476760981  
CCCCTCCG -1.61291290746  
CCCCTCGA 0.312760577309  
CCCCTCGC -1.20115828255  
CCCCTCGG -1.41540278893  
CCCCTCTA -0.629633502663  
CCCCTCTC -0.666906939334  
CCCCTGAA -1.19428840883  
CCCCTGAC -0.813765270745  
CCCCTGAG -1.21790245477  
CCCCTGCA -0.780554219401  
CCCCTGCC -1.25839786221  
CCCCTGCG -0.844190692385  
CCCCTGGA -1.09705055077  
CCCCTGGC -0.889764601934  
CCCCTGTA 0.772077003408  
CCCCTGTC -0.942415522306  
CCCCTTAA -0.776391908638  
CCCCTTAC -0.135888600326  
CCCCTTAG 0.591464067917  
CCCCTTCA -1.90617553408  
CCCCTTCC -2.00170091999  
CCCCTTCG -1.00459495753  
CCCCTTGA -0.830071436466  
CCCCTTGC -0.362473689864

CCCCTTTA -0.838930242717  
CCCCTTTC -1.14349880788  
CCCGAAAA 0.120907695699  
CCCGAAAC -1.45439723306  
CCCGAAAG -0.506856160422  
CCCGAACA 0.200827226647  
CCCGAACG 0.401786021784  
CCCGAACG -0.367790763946  
CCCGAAGA -0.0856877267367  
CCCGAAGC -1.29120359101  
CCCGAAGG -1.47511552313  
CCCGAATA 1.37917211582  
CCCGAATC 4.58906190549  
CCCGACAA -0.41667990801  
CCCGACAC -1.30659127543  
CCCGACAG -0.456991910645  
CCCGACCA -1.44219154924  
CCCGACCC -1.45454274947  
CCCGACCG -0.884924463631  
CCCGACGA 0.657516446492  
CCCGACGC -0.514160917967  
CCCGACGG -0.960004064454  
CCCGACTA -0.349674490589  
CCCGACTC 0.469044999999  
CCCGAGAA -1.05248338999  
CCCGAGAC -0.766996835881  
CCCGAGAG -0.335690758542  
CCCGAGCA -0.899016656412  
CCCGAGCC -1.66909744106  
CCCGAGCG -0.514702180745  
CCCGAGGA -1.13858872177  
CCCGAGGC -0.759685624818  
CCCGAGGG -1.26599698344  
CCCGAGTA -0.554477500518  
CCCGAGTC -0.441728300307  
CCCGATAA -0.295915855125  
CCCGATAC 0.694831102406  
CCCGATAG 0.0159347761835  
CCCGATCA 0.362352738451  
CCCGATCC -0.399462130865  
CCCGATCG 0.999902833776  
CCCGATGA -0.0769280132092  
CCCGATGC -0.775076223732  
CCCGATTA 1.91652406204  
CCCGATTC 2.47357963881  
CCCGCAAA -0.435893071204  
CCCGCAAC -0.0990506720128  
CCCGCAAG 0.895666447994  
CCCGCACA 0.0591450328169  
CCCGCACC -1.06647086924  
CCCGCACG -0.37362890754  
CCCGCAGA -0.309324183203  
CCCGCAGC -0.831456652821  
CCCGCAGG -1.47458466925

CCCGCATA -0.667751725624  
CCCGCATC 0.246632630123  
CCCGCCAA -1.2076438597  
CCCGCCAC -0.641622681373  
CCCGCCAG -0.102767065518  
CCCGCCCA -0.874363802299  
CCCGCCCC -1.65114375471  
CCCGCCCG -1.09134147753  
CCCGCCGA -0.334044070629  
CCCGCCGC -1.33543745882  
CCCGCCGG -0.735791371307  
CCCGCCTA -0.819678774773  
CCCGCCTC -0.666680441679  
CCCGCGAA -0.376331266048  
CCCGCGAC -0.752961475692  
CCCGCGAG 0.126491445788  
CCCGCGCA -0.248342604145  
CCCGCGCC -0.428469860382  
CCCGCGCG 0.102675883557  
CCCGCGGA -0.226684806796  
CCCGCGGC -0.536236528544  
CCCGCGGG -0.893499731458  
CCCGCGTA 0.435520432599  
CCCGCGTC -1.10231495582  
CCCGCTAA -0.580484760643  
CCCGCTAC -0.812915488184  
CCCGCTAG -0.506294704379  
CCCGCTCA -0.342635159983  
CCCGCTCC -1.22350556541  
CCCGCTCG -0.521627429811  
CCCGCTGA -0.59669183364  
CCCGCTGC -1.34901149658  
CCCGCTTA 0.180253203922  
CCCGCTTC -0.238967100119  
CCCGGAAA -0.483525861089  
CCCGGAAC -0.717770235292  
CCCGGAAG 0.142938548009  
CCCGGACA -0.609310334418  
CCCGGACC -1.13848837998  
CCCGGACG -1.26717152366  
CCCGGAGA -0.684700536804  
CCCGGAGC -1.47703076065  
CCCGGAGG -1.5708228566  
CCCGGATA 2.55331722219  
CCCGGATC 2.3890597906  
CCCGGCAA -0.510338353686  
CCCGGCAC -1.12590860031  
CCCGGCAG -1.12875022989  
CCCGGCCA -0.988472404795  
CCCGGCCC -2.01670430784  
CCCGGCCG -0.590580976877  
CCCGGCGA -1.26053272751  
CCCGGCGC -0.201233798264  
CCCGGCGG -0.874133973797

CCCGGCTA -0.531939734799  
CCCGGCTC -0.986602966431  
CCCGGGAA -0.348088174294  
CCCGGGAC -1.19312552657  
CCCGGGAG -0.650710899771  
CCCGGGCA -0.242216966744  
CCCGGGCC -1.18460854858  
CCCGGGCG -0.353643195819  
CCCGGGGA -0.687481170237  
CCCGGGGC -0.746714470522  
CCCGGGTA -0.787842114528  
CCCGGGTC -1.21408571947  
CCCGGTAA -0.401465427677  
CCCGGTAC -1.25656527135  
CCCGGTAG -0.615198440731  
CCCGGTCA -0.158992193825  
CCCGGTCC -1.46573960275  
CCCGGTCCG -0.771568424575  
CCCGGTGA -0.551637536357  
CCCGGTGC -1.12613426525  
CCCGGTTA -0.685504312029  
CCCGGTTC -1.23052886631  
CCCGTAAA -0.435871004337  
CCCGTAAC -0.169636750888  
CCCGTAAG 0.151170946684  
CCCGTACA -0.151479050111  
CCCGTACC -0.0313341185728  
CCCGTACG -0.0859221351551  
CCCGTAGA -0.200980445649  
CCCGTAGC -1.19044127955  
CCCGTAGG -1.38373163019  
CCCGTATA -0.178082323826  
CCCGTATC 1.60890256663  
CCCGTCAA -0.362765763586  
CCCGTCAC -0.797829453672  
CCCGTCAG -0.055826259276  
CCCGTCCA -0.486929154895  
CCCGTCCC -1.63785783529  
CCCGTCCG -1.46861912073  
CCCGTCGA -0.236523090498  
CCCGTCGC -1.34904147421  
CCCGTCGG -1.28720574086  
CCCGTCTA -0.637254898933  
CCCGTCTC -0.216697259475  
CCCGTGAA -0.824254110671  
CCCGTGAC -0.495581032223  
CCCGTGAG -0.804116220838  
CCCGTGCA -0.597245170741  
CCCGTGCC -1.12381995052  
CCCGTGCG -0.594963539954  
CCCGTGGA -1.07750909088  
CCCGTGGC -1.24895053678  
CCCGTGTA 0.216438494231  
CCCGTGTC -0.169146699896

CCCGTTAA 0.321053347602  
CCCGTTAC -1.19760093703  
CCCGTTAG 1.47616848741  
CCCGTTCA -0.974964983993  
CCCGTTCC -1.05635050436  
CCCGTTCG -1.0215608393  
CCCGTTGA -0.0577192217529  
CCCGTTGC -1.0809775444  
CCCGTTTA -1.00031835705  
CCCGTTTC 0.160628056483  
CCCTAAAA 0.726212685561  
CCCTAAAC -0.677580641316  
CCCTAAAG -0.754706839973  
CCCTAACA -0.923257109923  
CCCTAACC -0.693125916477  
CCCTAACG 0.480586387849  
CCCTAAGA -0.693332012689  
CCCTAAGC -1.18280489446  
CCCTAAGG -0.725162011237  
CCCTAATA -0.831884250416  
CCCTAATC 0.990601024759  
CCCTACAA -0.865012863276  
CCCTACAC -0.452468619245  
CCCTACAG -0.402969721844  
CCCTACCA -1.08151755811  
CCCTACCC -1.19625860534  
CCCTACCG -0.672710317204  
CCCTACGA 0.172018723467  
CCCTACGC -0.406622412883  
CCCTACGG -0.318927433952  
CCCTACTA -0.361004994134  
CCCTACTC -0.100124245915  
CCCTAGAA -0.58159726383  
CCCTAGAC -1.11364483483  
CCCTAGAG 0.328623532086  
CCCTAGCA -0.30066148062  
CCCTAGCC -1.09478265973  
CCCTAGCG -0.990789634019  
CCCTAGGA -0.764952528004  
CCCTAGGC -0.494299072151  
CCCTAGGG -1.04380902944  
CCCTAGTA -0.519125963065  
CCCTAGTC -0.605679918424  
CCCTATAA 0.468729402164  
CCCTATAC -0.789044134252  
CCCTATAG -1.15482827054  
CCCTATCA 0.406826635493  
CCCTATCC -0.803853916569  
CCCTATCG 1.098121002  
CCCTATGA -0.555295223669  
CCCTATGC -0.258988410276  
CCCTATTA 0.43750520157  
CCCTATTC 0.164882381918  
CCCTCAA -0.0403779950587



CCCTCAAC -0.589937498705  
CCCTCAAG -0.914710362481  
CCCTCACA 0.118498659981  
CCCTCACC -0.629728848183  
CCCTCACG 0.0565253209715  
CCCTCAGA -0.0670774470061  
CCCTCAGC -0.807631930759  
CCCTCAGG -0.691369935119  
CCCTCATA -0.021720250746  
CCCTCATC -0.265566418452  
CCCTCCAA -0.877367394361  
CCCTCCAC -1.22747822602  
CCCTCCAG -1.53987261824  
CCCTCCCA -1.00735623041  
CCCTCCCC -1.57371236712  
CCCTCCCG -0.490203170168  
CCCTCCGA 0.287770058494  
CCCTCCGC -1.33336671234  
CCCTCCGG -1.51296186563  
CCCTCCTA -0.625600678611  
CCCTCCTC -0.450887299222  
CCCTCGAA -0.59055266467  
CCCTCGAC -0.890497180287  
CCCTCGAG -0.0890731172349  
CCCTCGCA -0.691078485931  
CCCTCGCC -1.81548050212  
CCCTCGCG -0.448106249433  
CCCTCGGA -0.706570467526  
CCCTCGGC -0.677367050697  
CCCTCGTA 0.123539481868  
CCCTCGTC -1.3023652622  
CCCTCTAA -0.299459252719  
CCCTCTAC -1.47808580671  
CCCTCTAG -0.170575217274  
CCCTCTCA -0.90956628431  
CCCTCTCC -0.840330031532  
CCCTCTCG -0.812029274474  
CCCTCTGA -0.934445219722  
CCCTCTGC -1.26727686173  
CCCTCTTA -0.664559940658  
CCCTCTTC -0.34808859065  
CCCTGAAA -1.04705369161  
CCCTGAAC -0.942861231385  
CCCTGAAG -0.266066878344  
CCCTGACA 0.375163803872  
CCCTGACC -0.806893731601  
CCCTGACG -0.857741622388  
CCCTGAGA -0.939013893924  
CCCTGAGC -0.298669633597  
CCCTGAGG -0.628171052273  
CCCTGATA 1.46417264701  
CCCTGATC 0.218150550034  
CCCTGCAA -0.864636477467  
CCCTGCAC -0.786997120061

CCCTGCAG -0.546311094266  
CCCTGCCA -0.632067103384  
CCCTGCCC -1.48419853708  
CCCTGCCG -1.12020369063  
CCCTGCGA -0.677265668015  
CCCTGCGC 0.191040362909  
CCCTGCGG -0.993106446887  
CCCTGCTA -0.748879729812  
CCCTGCTC 0.191242711917  
CCCTGGAA -1.17693968773  
CCCTGGAC -0.790204518376  
CCCTGGAG -1.20169621448  
CCCTGGCA -0.408138781374  
CCCTGGCC -1.27066599943  
CCCTGGCG -0.489203915808  
CCCTGGGA -1.14662064504  
CCCTGGGC -1.20644517082  
CCCTGGTA -0.688330952798  
CCCTGGTC -1.25201262686  
CCCTGTAA 0.431088947694  
CCCTGTAC -1.38430703416  
CCCTGTAG 0.30444157659  
CCCTGTCA -0.932378844978  
CCCTGTCC -1.43449812338  
CCCTGTCCG -0.841654043558  
CCCTGTGA -0.377508304412  
CCCTGTGC -0.581539390349  
CCCTGTTA -0.112543936712  
CCCTGTTC -1.01344252217  
CCCTTAAA -0.416746524967  
CCCTTAAC -0.928831492002  
CCCTTAAG 0.14335303039  
CCCTTACA 0.138205205015  
CCCTTACC -0.28192254689  
CCCTTACG -0.447116571261  
CCCTTAGA -0.0543090580737  
CCCTTAGC -0.315320958427  
CCCTTAGG -0.218600630851  
CCCTTATA -0.826461838271  
CCCTTATC -0.172846439162  
CCCTTCAA -0.988244658072  
CCCTTCAC -1.91035429091  
CCCTTCAG -0.58515148668  
CCCTTCCA -1.37627844174  
CCCTTCCC -1.3116974652  
CCCTTCCG -1.06680645216  
CCCTTCGA -0.383144931711  
CCCTTCGC -0.945845671072  
CCCTTCGG -0.978500470823  
CCCTTCTA -0.578614489568  
CCCTTCTC -0.336162906227  
CCCTTGAA -0.456248715216  
CCCTTGAC -0.633874296529  
CCCTTGAG -0.578090297385

CCCTTGCA 0.415695642466  
CCCTTGCC -0.855721879514  
CCCTTGCG -1.07601957735  
CCCTTGGA -1.2181083428  
CCCTTGGC -0.705553518037  
CCCTTGTA -0.127671398644  
CCCTTGTC -0.000172371376985  
CCCTTTAA -0.452472158271  
CCCTTTAC 0.0740707702755  
CCCTTTAG 0.166086899777  
CCCTTTCA -1.06582926467  
CCCTTTCC -1.05948316677  
CCCTTTCCG -0.748111136667  
CCCTTTGA -0.491992876361  
CCCTTTGC -0.423008102596  
CCCTTTTA -0.537726250252  
CCCTTTTC -0.943724961872  
CCGAAAAA 0.686338689419  
CCGAAAAC -0.954262307269  
CCGAAAAG -0.28482059271  
CCGAAACA -0.42459566796  
CCGAAACC -0.341917362269  
CCGAAACG -0.949496488509  
CCGAAAGA 0.818952649938  
CCGAAAGC -0.319166422287  
CCGAAAGG -0.379717489258  
CCGAAATA 1.8840716113  
CCGAAATC 8.40367586842  
CCGAACAA 0.854014403627  
CCGAACAC -0.541363119764  
CCGAACAG 0.0924505969694  
CCGAACCA 0.918688435721  
CCGAACCC -0.918494413833  
CCGAACCG -0.603888963163  
CCGAACGA -0.588727776396  
CCGAACGC 0.383808603148  
CCGAACGG -0.709543873779  
CCGAACTA -0.733210380568  
CCGAACTC 0.0879456252328  
CCGAAGAA 0.134276678137  
CCGAAGAC -0.477117726154  
CCGAAGAG -0.0247769281956  
CCGAAGCA -0.374726213733  
CCGAAGCC -1.45050513733  
CCGAAGCG -0.578181062989  
CCGAAGGA 0.628218725033  
CCGAAGGC -1.11137673561  
CCGAAGTA 0.920367807579  
CCGAAGTC -0.801374933046  
CCGAATAA 0.976222795418  
CCGAATAC -0.0137874202009  
CCGAATAG 0.132456994313  
CCGAATCA 3.85693321776  
CCGAATCC 3.61758098836

CCGAATCG 2.64163652692  
CCGAATGA -0.397825643673  
CCGAATGC -0.320337631667  
CCGAATTA 0.942481306551  
CCGAATTC 1.21734203961  
CCGACAAA 0.795515763474  
CCGACAAC 0.321396424932  
CCGACAAG -0.471878302464  
CCGACACA -0.15046959503  
CCGACACC -1.02789382198  
CCGACACG -1.06714640682  
CCGACAGA -0.205437744625  
CCGACAGC 0.142482846385  
CCGACAGG -0.727457381772  
CCGACATA 0.904513804456  
CCGACATC 1.01094938254  
CCGACCAA -0.568366303401  
CCGACCAC -0.7509996063  
CCGACCAG -0.864190560209  
CCGACCCA -1.17037958286  
CCGACCCC -0.932264763439  
CCGACCCG -1.67936124058  
CCGACCGA -0.110439465395  
CCGACCGC -0.646575027614  
CCGACCGG -0.948202454114  
CCGACCTA -1.17823413848  
CCGACCTC -1.34664721913  
CCGACGAA 0.161555281257  
CCGACGAC -0.696604362538  
CCGACGAG -0.353459166475  
CCGACGCA -0.220598723214  
CCGACGCC -2.01535177543  
CCGACGCG -0.155636780958  
CCGACGGA -0.837221517763  
CCGACGGC -1.15455763915  
CCGACGTA 0.414455317993  
CCGACGTC -1.16936658875  
CCGACTAA -0.962448074074  
CCGACTAC -0.515932096319  
CCGACTAG -0.808119899971  
CCGACTCA 1.64563411599  
CCGACTCC -1.17321746524  
CCGACTCG -0.414874588467  
CCGACTGA -0.64121985696  
CCGACTGC 0.0427489342042  
CCGACTTA -0.0891509758037  
CCGACTTC -0.539116462879  
CCGAGAAA 0.404938252932  
CCGAGAAC -1.48981497111  
CCGAGAAG -1.59081585455  
CCGAGACA 0.113733882111  
CCGAGACC -1.09575131192  
CCGAGACG -1.08467541006  
CCGAGAGA 1.10558647295

CCGAGAGC -0.332951968886  
CCGAGAGG -1.01729506408  
CCGAGATA 4.02997201339  
CCGAGATC 4.33318492347  
CCGAGCAA -0.326918554335  
CCGAGCAC -0.483296448943  
CCGAGCAG -0.891608018049  
CCGAGCCA -0.548351863117  
CCGAGCCC -1.62450113536  
CCGAGCCG -1.11497384313  
CCGAGCGA -0.138039703512  
CCGAGCGC 0.231224127902  
CCGAGCGG -1.49259248187  
CCGAGCTA -0.163012527198  
CCGAGCTC -0.865679241027  
CCGAGGAA -0.778792825415  
CCGAGGAC -1.1929171404  
CCGAGGAG -0.720064981293  
CCGAGGCA -0.270016223021  
CCGAGGCC -0.610677647467  
CCGAGGCG -0.318168208817  
CCGAGGGA -0.685993530309  
CCGAGGGC -0.780304405811  
CCGAGGTA -0.319952918739  
CCGAGGTC -0.439315517385  
CCGAGTAA 1.17380119633  
CCGAGTAC -0.545276449648  
CCGAGTAG -0.526571865288  
CCGAGTCA 0.203605570122  
CCGAGTCC -1.33054839869  
CCGAGTCG -0.746556671605  
CCGAGTGA -0.247227186466  
CCGAGTGC -0.383892707056  
CCGAGTTA -0.470599881418  
CCGAGTTC -0.419123917631  
CCGATAAA 0.987347410929  
CCGATAAC -0.295915855125  
CCGATAAG 0.818952649938  
CCGATACA 0.755457113454  
CCGATACC 2.17711794099  
CCGATACG 2.1874281642  
CCGATAGA 1.58621095738  
CCGATAGC 2.08533663626  
CCGATAGG 1.1584788798  
CCGATATA 1.60881534005  
CCGATATC 11.8298921526  
CCGATCAA 0.783461633231  
CCGATCAC 0.459904112569  
CCGATCAG -0.406406532306  
CCGATCCA 0.662650532119  
CCGATCCC 0.784237720783  
CCGATCCG 0.357336273389  
CCGATCGA -0.105711951386  
CCGATCGC 3.08598100004

CCGATCGG -0.725083111779  
CCGATCTA 0.522730564988  
CCGATCTC 3.12965008097  
CCGATGAA -0.823680372126  
CCGATGAC -0.769050303589  
CCGATGAG -0.87591431198  
CCGATGCA 0.648711766519  
CCGATGCC -0.752724985494  
CCGATGCG -0.712519986346  
CCGATGGA 0.00788869681095  
CCGATGGC -0.686050987435  
CCGATGTA -0.332068877845  
CCGATGTC 0.19122064505  
CCGATTAA 1.07886995041  
CCGATTAC 6.68484220705  
CCGATTAG 1.14817552646  
CCGATTCA 0.12601346912  
CCGATTCC 3.20176481084  
CCGATTCG 2.37736560011  
CCGATTGA -0.518093400227  
CCGATTGC 4.67654933096  
CCGATTTA 0.930352440409  
CCGATTTT 9.72629726555  
CCGCAAAA 0.684916209203  
CCGCAAAC -1.024683301  
CCGCAAAG -0.280825240697  
CCGCAACA 0.162275993464  
CCGCAACC -0.884905311256  
CCGCAACG 0.217397778416  
CCGCAAGA 0.911471737467  
CCGCAAGC 0.0681474818825  
CCGCAAGG -1.4293342683  
CCGCAATA 1.03161604447  
CCGCAATC 11.4075643756  
CCGCACAA 0.32792655217  
CCGCACAC -0.0752432287238  
CCGCACAG -0.179515629298  
CCGCACCA 0.126491445788  
CCGCACCC -0.820311635867  
CCGCACCG -0.95228357546  
CCGCACGA -0.948138751649  
CCGCACGC -1.01197611639  
CCGCACGG -0.97758136499  
CCGCACTA -0.621344687753  
CCGCACTC -0.650968832303  
CCGCAGAA -0.0618634210303  
CCGCAGAC -0.588256253245  
CCGCAGAG 0.136113432556  
CCGCAGCA -0.41663535792  
CCGCAGCC -0.951495205406  
CCGCAGCG -0.169160023288  
CCGCAGGA 0.333412042247  
CCGCAGGC -1.15644914438  
CCGCAGTA -0.501939620796

CCGCAGTC 0.586943066475  
CCGCATAA 0.0585579708808  
CCGCATAC -0.67601097926  
CCGCATAG 0.348509526548  
CCGCATCA 0.811503625045  
CCGCATCC -0.020418513765  
CCGCATCG -0.735961244548  
CCGCATGA -0.50528295934  
CCGCATGC -0.442923658334  
CCGCATTA 0.176695233869  
CCGCATTC -0.0942461321464  
CCGCCAAA 0.211607099404  
CCGCCAAC -1.2744356865  
CCGCCAAG -0.602512698461  
CCGCCACA -0.185603586482  
CCGCCACC -1.4214813781  
CCGCCACG -1.17725445285  
CCGCCAGA 0.753413430112  
CCGCCAGC 0.329231828177  
CCGCCAGG -1.56124458721  
CCGCCATA -1.18160953643  
CCGCCATC -0.708764455379  
CCGCCCAA -0.768165130769  
CCGCCCAC -0.757627577194  
CCGCCCAG -0.573357578926  
CCGCCCCA -0.727791507448  
CCGCCCCC -1.68078767617  
CCGCCCCG -0.360198096239  
CCGCCCGA -0.509001850981  
CCGCCCGC -0.214915880401  
CCGCCCGG -1.50728318638  
CCGCCCTA -0.0666090465251  
CCGCCCTC -0.705239793804  
CCGCCGAA 0.603268176392  
CCGCCGAC -0.847032113792  
CCGCCGAG -0.73640050011  
CCGCCGCA -1.14422680632  
CCGCCGCC -1.33355490525  
CCGCCGCG -0.980608689343  
CCGCCGGA -0.190318193456  
CCGCCGGC -1.20301981015  
CCGCCGTA -1.51561405325  
CCGCCGTC -1.16817247979  
CCGCCTAA 0.276315897223  
CCGCCTAC -1.06827077615  
CCGCCTAG -0.422117100793  
CCGCCTCA 0.0420723557317  
CCGCCTCC -1.2943866325  
CCGCCTCG -1.10489782016  
CCGCCTGA -0.413502695503  
CCGCCTGC -0.587250545368  
CCGCCTTA -0.926772403488  
CCGCCTTC 0.519035613816  
CCGCGAAA 1.12407621763

CCGCGAAC -1.04680575162  
CCGCGAAG -0.202945645889  
CCGCGACA -0.206165951239  
CCGCGACC -1.01529551447  
CCGCGACG -0.578903648798  
CCGCGAGA 0.654161658159  
CCGCGAGC -0.261628523564  
CCGCGAGG -1.36277747445  
CCGCGATA 1.17575369771  
CCGCGATC 5.04232951186  
CCGCGCAA 0.87109041156  
CCGCGCAC -0.544275529865  
CCGCGCAG -0.702583234454  
CCGCGCCA -0.308645314773  
CCGCGCCC -0.389181468931  
CCGCGCCG -0.267430027832  
CCGCGCGA -0.184674279928  
CCGCGCGC 0.0521048694994  
CCGCGCGG -0.197463070304  
CCGCGCTA -1.08497768451  
CCGCGCTC -1.36192644282  
CCGCGGAA -0.864834246559  
CCGCGGAC -0.477200372817  
CCGCGGAG 0.464083493927  
CCGCGGCA 0.308390504911  
CCGCGGCC -1.01654895416  
CCGCGGCG 0.732947035409  
CCGCGGGA -0.387097815414  
CCGCGGGC -0.140840738388  
CCGCGGTA 0.174572859245  
CCGCGGTC -1.00769930774  
CCGCGTAA 0.235310870053  
CCGCGTAC 0.313567267026  
CCGCGTAG -0.349038715003  
CCGCGTCA -0.322825358666  
CCGCGTCC -1.03747000959  
CCGCGTCG -0.604969198761  
CCGCGTGA -0.727975328615  
CCGCGTGC -0.294176736184  
CCGCGTTA -1.12801952514  
CCGCGTTC -0.169906549565  
CCGCTAAA -0.10374008945  
CCGCTAAC -0.186952996223  
CCGCTAAG 0.892943896221  
CCGCTACA -0.800695440081  
CCGCTACC -1.41912938316  
CCGCTACG -1.02642429354  
CCGCTAGA 1.8763019923  
CCGCTAGC -0.494272841724  
CCGCTAGG -1.0782135652  
CCGCTATA -0.367699165629  
CCGCTATC 1.40553994023  
CCGCTCAA 0.0995105371961  
CCGCTCAC -1.41546087059



CCGCTCAG 0.188143774335  
CCGCTCCA -0.971154910392  
CCGCTCCC -0.545276449648  
CCGCTCCG -0.837162811569  
CCGCTCGA -0.177362236154  
CCGCTCGC -0.874977927374  
CCGCTCTA -1.59588373957  
CCGCTCTC -0.702771219181  
CCGCTGAA -0.603475313494  
CCGCTGAC -0.703654518399  
CCGCTGAG -1.31318614602  
CCGCTGCA -0.478385530123  
CCGCTGCC -1.61538127391  
CCGCTGCG -0.980313909307  
CCGCTGGA -1.04933573875  
CCGCTGGC -0.702480810882  
CCGCTGTA -1.60177954847  
CCGCTGTC 0.0451914865788  
CCGCTTAA -0.454304540953  
CCGCTTAC -0.129893906882  
CCGCTTAG -0.578541627271  
CCGCTTCA -0.309293997394  
CCGCTTCC -1.38834360541  
CCGCTTCG -0.861647874221  
CCGCTTGA -0.803801663893  
CCGCTTGC -1.17410555255  
CCGCTTTA -0.843422723774  
CCGCTTTC -0.378412421429  
CCGAAAA 0.821377507184  
CCGAAAC -0.80268978524  
CCGAAAG -0.464013129766  
CCGAAACA 0.0519204237989  
CCGAAACC -0.648943676801  
CCGAAACG -1.10011388991  
CCGGAAGA -0.618869035077  
CCGGAAGC -0.464488191942  
CCGGAAGG -0.484983315208  
CCGGAATA 1.72625562312  
CCGGAATC 7.20345188869  
CCGACAA 0.565905639541  
CCGACAC -1.24391554388  
CCGACAG -0.0285430762404  
CCGACCA -0.652178970968  
CCGACCC -1.24723806462  
CCGACCG -1.28867839197  
CCGACGA -0.341990640922  
CCGACGC -0.463866156104  
CCGACGG -1.03427073022  
CCGACTA -1.43909302801  
CCGACTC -0.891571795079  
CCGAGAA -0.27244482747  
CCGAGAC -0.449411317262  
CCGAGAG -1.04095324375  
CCGAGCA -0.505304609851

CCGGAGCC -1.64662337781  
CCGGAGCG -0.633921552933  
CCGGAGGA -1.3764878688  
CCGGAGGC -1.08004324157  
CCGGAGTA -0.808663660885  
CCGGAGTC -0.563989985663  
CCGGATAA 0.979696037028  
CCGGATAC 3.46096202364  
CCGGATAG 0.30444157659  
CCGGATCA 1.85514278124  
CCGGATCC 2.76682581937  
CCGGATCG 1.46900216823  
CCGGATGA 0.86087782383  
CCGGATGC -0.324375451991  
CCGGATTA 5.09950393181  
CCGGATTC 7.94797341225  
CCGGCAAA 0.356380736408  
CCGGCAAC -0.650168596103  
CCGGCAAG -0.965133153809  
CCGGCACA 1.49436699107  
CCGGCACC -1.38402807565  
CCGGCACG -1.41934026746  
CCGGCAGA -0.430452339395  
CCGGCAGC -0.984273662884  
CCGGCAGG -0.96151876752  
CCGGCATA -0.48243958833  
CCGGCATC 0.982555153564  
CCGGCCAA -0.900599433681  
CCGGCCAC -1.64611334173  
CCGGCCAG -0.870656984982  
CCGGCCCA -1.00266452301  
CCGGCCCC -0.981461386397  
CCGGCCCG -1.39350558689  
CCGGCCGA -0.560364149584  
CCGGCCGC -0.209915653223  
CCGGCCGG -0.524707631373  
CCGGCCTA -1.60155159357  
CCGGCCTC -0.799448453912  
CCGGCGAA 0.154432679455  
CCGGCGAC -0.739134085317  
CCGGCGAG -1.05855844013  
CCGGCGCA -0.0819921510311  
CCGGCGCC -1.1242098679  
CCGGCGCG -0.108662666238  
CCGGCGGA -0.793645076042  
CCGGCGGC -0.629707197672  
CCGGCGTA 0.584241957035  
CCGGCGTC -0.753614321873  
CCGGCTAA -0.796916593179  
CCGGCTAC -1.35950970452  
CCGGCTAG -0.622567525275  
CCGGCTCA -0.32752435229  
CCGGCTCC -0.991786182064  
CCGGCTCG -1.45012875152

CCGGCTGA -0.815873905622  
CCGGCTGC -1.04859295968  
CCGGCTTA -0.887885379205  
CCGGCTTC -0.277692370102  
CCGGGAAA -0.164483512886  
CCGGGAAC -1.01463871291  
CCGGGAAG -1.38794640181  
CCGGGACA -0.604919444221  
CCGGGACC -1.50645859336  
CCGGGACG -1.3774100973  
CCGGGAGA 0.451414405896  
CCGGGAGC -0.668922726826  
CCGGGAGG -0.715869986586  
CCGGGATA 0.99794242163  
CCGGGATC 1.7849942925  
CCGGGCAA -0.189500262128  
CCGGGCAC -0.638274762914  
CCGGGCAG -0.569444873575  
CCGGGCCA -0.710417388631  
CCGGGCCC -0.85605288252  
CCGGGCCG -1.845600943  
CCGGGCGA -1.07652794801  
CCGGGCGC -0.873475090453  
CCGGGCTA -0.9590208398  
CCGGGCTC -0.535309720126  
CCGGGGAA -0.439025109087  
CCGGGGAC -1.57441101246  
CCGGGGAG -1.26666523479  
CCGGGGCA -0.157597193104  
CCGGGGCC -1.37895269622  
CCGGGGCG -1.09580065011  
CCGGGGGA -0.294933671361  
CCGGGGGC -1.45533320131  
CCGGGGTA -0.151541503509  
CCGGGGTC -0.699183271497  
CCGGGTAA -0.577456187223  
CCGGGTAC 0.00109501623544  
CCGGGTAG -0.505507999749  
CCGGGTCA -0.50994406457  
CCGGGTCC -1.68452384659  
CCGGGTCCG -1.16647333103  
CCGGGTGA -0.223819236743  
CCGGGTGC -1.37910091895  
CCGGGTTA -1.43722046698  
CCGGGTTC 0.292861675811  
CCGGTAAA 0.465434985448  
CCGGTAAC -0.869232214808  
CCGGTAAG -0.525883837026  
CCGGTACA -0.740156863789  
CCGGTACC -0.827903887218  
CCGGTACG -1.50330948488  
CCGGTAGA 0.612316632794  
CCGGTAGC -1.13049330422  
CCGGTAGG 0.623478512166

CCGGTATA 0.25112719296  
CCGGTATC 2.88474491182  
CCGGTCAA -0.158992193825  
CCGGTCAC -1.18142613162  
CCGGTCAG -0.462651437523  
CCGGTCCA -0.571628868884  
CCGGTCCC -1.05018302318  
CCGGTCCG -1.09947748979  
CCGGTCGA -0.247154740525  
CCGGTCGC -0.722001244792  
CCGGTCTA -0.566752091254  
CCGGTCTC 0.110064953189  
CCGGTGAA -0.342003131601  
CCGGTGAC -0.73674565922  
CCGGTGAG -1.40782511004  
CCGGTGCA -0.408492892137  
CCGGTGCC -1.22562752368  
CCGGTGCG -1.17175147582  
CCGGTGGA 0.00372721876031  
CCGGTGGC -1.36355522743  
CCGGTGTA -0.453212647387  
CCGGTGTC -0.300302165406  
CCGGTTAA 0.303029088917  
CCGGTTAC -0.272873465955  
CCGGTTAG 0.0777786284826  
CCGGTTCA -0.21209257048  
CCGGTTCC -1.14647450409  
CCGGTTCCG -1.32495507242  
CCGGTTGA -0.630907135615  
CCGGTTGC -1.31884879557  
CCGGTTTA -1.30849402227  
CCGGTTTC -0.0164038011984  
CCGTAAAA 0.885692015886  
CCGTAAAC -1.05229478073  
CCGTAAAG -0.193395688705  
CCGTAAACA 0.256931611719  
CCGTAAACC 0.21479472081  
CCGTAAACG 0.782880816634  
CCGTAAAGA 1.69859605428  
CCGTAAAGC -1.13721266525  
CCGTAAAGG -0.661896095078  
CCGTAAATA 3.27653339374  
CCGTAAATC 11.7703295147  
CCGTACAA 0.990347255787  
CCGTACAC -0.633646341628  
CCGTACAG -0.603744695815  
CCGTACCA 0.640110684621  
CCGTACCC -0.72417087582  
CCGTACCG -1.51376647357  
CCGTACGA -0.339849322101  
CCGTACGC -0.368051194613  
CCGTACGG -0.0793949224088  
CCGTACTA -0.278799044305  
CCGTACTC -0.0398148735916

CCGTAGAA 0.676564108183  
CCGTAGAC -0.880377231762  
CCGTAGAG -1.17322912321  
CCGTAGCA -0.353831388724  
CCGTAGCC -1.1184010774  
CCGTAGCG -0.435960520873  
CCGTAGGA -0.96461687239  
CCGTAGGC -0.885728030679  
CCGTAGTA 0.00339101130399  
CCGTAGTC -0.226970010645  
CCGTATAA 0.603666837246  
CCGTATAC 0.208214839032  
CCGTATAG 0.727341010275  
CCGTATCA 2.02237299455  
CCGTATCC 3.70909062081  
CCGTATCG 1.74798836455  
CCGTATGA -0.646843369045  
CCGTATGC -0.729026419294  
CCGTATTA 0.537984390961  
CCGTATTC 1.70963677406  
CCGTCAAA 0.461420689237  
CCGTCAAC -1.06947654308  
CCGTCAAG 0.0477502022727  
CCGTCACA -0.380082425277  
CCGTCACC 0.0539709770155  
CCGTCACG -1.297128753  
CCGTCAGA -0.140611118063  
CCGTCAGC -0.818670360582  
CCGTCAGG -0.857329429964  
CCGTCATA 0.459513362479  
CCGTCATC -0.0739027706363  
CCGTCCAA 0.32562243816  
CCGTCCAC -1.03807955475  
CCGTCCAG -0.817089456914  
CCGTCCCA -0.829223319328  
CCGTCCCC -0.960815542265  
CCGTCCCG -0.676084466091  
CCGTCCGA -0.64121985696  
CCGTCCGC -0.574925991914  
CCGTCCTA -0.520131462764  
CCGTCCTC -1.47958219012  
CCGTCGAA -0.522667487056  
CCGTCGAC -0.624387833633  
CCGTCGAG -0.691026857789  
CCGTCGCA -0.608757205495  
CCGTCGCC -1.29602374422  
CCGTCGCG -0.336134177664  
CCGTCGGA -0.900742035606  
CCGTCGGC -1.07626272925  
CCGTCGTA -0.668913358817  
CCGTCGTC -0.325136967084  
CCGTCTAA -0.0779818102023  
CCGTCTAC -0.601946662502  
CCGTCTAG -0.652282851785

CCGTCTCA -0.108530265035  
CCGTCTCC -1.11160510687  
CCGTCTCG -1.39638656212  
CCGTCTGA -0.385008541091  
CCGTCTGC -0.734047256094  
CCGTCTTA -0.189028947155  
CCGTCTTC -0.562981155116  
CCGTGAAA 0.312004683022  
CCGTGAAC 0.054744982788  
CCGTGAAG -0.547408608638  
CCGTGACA -0.0389059684806  
CCGTGACC -0.743746268719  
CCGTGACG -0.412699544812  
CCGTGAGA -0.108530265035  
CCGTGAGC -0.31662456901  
CCGTGAGG -0.392396569832  
CCGTGATA 2.67684338067  
CCGTGATC 1.49519845397  
CCGTGCAA 0.447832495374  
CCGTGCAC -0.959125761508  
CCGTGCAG -0.629633502663  
CCGTGCCA -0.103444476702  
CCGTGCCC -0.538450709662  
CCGTGCCG -0.567884163172  
CCGTGCGA -0.753110739312  
CCGTGCGC 0.289208776594  
CCGTGCTA -0.277879105761  
CCGTGCTC -0.0290841308403  
CCGTGGAA -0.839709869296  
CCGTGGAC -0.760540403652  
CCGTGGAG -1.02883561922  
CCGTGGCA -1.04003767694  
CCGTGGCC -1.24895053678  
CCGTGGCG 0.363488765751  
CCGTGGGA -0.846002673623  
CCGTGGGC -0.77979041435  
CCGTGGTA 0.164147513608  
CCGTGGTC -0.766921059092  
CCGTGTAA -0.187985559061  
CCGTGTAC -0.699439330426  
CCGTGTAG 0.631329112404  
CCGTGTCA 0.453015294651  
CCGTGTCC -0.767040553259  
CCGTGTCTG -0.728922330298  
CCGTGTGA 0.301771069315  
CCGTGTGC -1.01733128705  
CCGTGTTA 0.00334354672192  
CCGTGTTC -0.895027549738  
CCGTTAAA -0.0685111688337  
CCGTTAAC 0.181394435672  
CCGTTAAG 0.153411982762  
CCGTTACA 0.0561310318556  
CCGTTACC -0.54067529968  
CCGTTACG -0.876201181252

CCGTTAGA -0.286777257653  
CCGTTAGC -0.201450511553  
CCGTTAGG 0.309471573221  
CCGTTATA 0.729127593798  
CCGTTATC 1.03072878987  
CCGTTCAA -0.187201144389  
CCGTTCAC -0.494311771009  
CCGTTCAG 0.830014395696  
CCGTTCCA 0.0874160204223  
CCGTTCCC -0.71428887474  
CCGTTCCG -1.05635050436  
CCGTTCGA -0.204737225684  
CCGTTCGC -0.351317431298  
CCGTTCTA 0.257295923205  
CCGTTCTC 0.292700546046  
CCGTTGAA 0.287597062583  
CCGTTGAC -0.481154921944  
CCGTTGAG -0.457670987254  
CCGTTGCA -0.4934482487  
CCGTTGCC -0.716428111781  
CCGTTGCG 0.217397778416  
CCGTTGGA -0.373363896957  
CCGTTGGC -0.875393450645  
CCGTTGTA -0.00578505820656  
CCGTTGTC 0.578022223182  
CCGTTTAA 0.170817536456  
CCGTTTAC -0.420186874455  
CCGTTTAG 0.171142918657  
CCGTTTCA -0.626058670193  
CCGTTTCC -0.616032609943  
CCGTTTCG -1.19507615435  
CCGTTTGA -0.0775329784526  
CCGTTTGC -0.673352962664  
CCGTTTTA 0.119512694978  
CCGTTTTC 0.915772070238  
CCTAAAAA 0.116804923842  
CCTAAAAC 0.0237135550149  
CCTAAAAG 0.62326658697  
CCTAAACA -0.0466376990859  
CCTAAACC -0.277773559519  
CCTAAACG -0.627378726837  
CCTAAAGA 0.621161074764  
CCTAAAGC -0.629909338502  
CCTAAAGG 0.141948869837  
CCTAAATA 1.43868749728  
CCTAAATC 1.95631437063  
CCTAACAA -0.151774038325  
CCTAACAC -0.716209941246  
CCTAACAG 0.11871849594  
CCTAACCA -0.77174204502  
CCTAACCC -1.19333599452  
CCTAACCG -0.444170436325  
CCTAACGA 0.686169024356  
CCTAACGC -1.24637058693

CCTAACTA -0.520996025963  
CCTAACTC -0.523779990243  
CCTAAGAA 0.193766870064  
CCTAAGAC -0.738809119472  
CCTAAGAG -0.180371240843  
CCTAAGCA -0.177410533448  
CCTAAGCC -1.58567177638  
CCTAAGCG -0.61477979479  
CCTAAGGA 0.347539000752  
CCTAAGGC -0.788475391979  
CCTAAGTA -0.621235186129  
CCTAAGTC -0.457331240772  
CCTAATAA -0.543777984465  
CCTAATAC -0.630646288592  
CCTAATAG 0.80913164501  
CCTAATCA 0.837472372243  
CCTAATCC -0.360716043082  
CCTAATCG 0.90962957042  
CCTAATGA 0.134711145606  
CCTAATGC -0.115864375677  
CCTAATTA 0.960162279727  
CCTAATTC 0.573560344289  
CCTACAAA -0.278799044305  
CCTACAAC -0.384750608559  
CCTACAAG 0.0673401676314  
CCTACACA 0.568036965818  
CCTACACC -0.723815099632  
CCTACACG -0.0117845397444  
CCTACAGA 0.457077055444  
CCTACAGC -0.645967147878  
CCTACAGG 0.117014350902  
CCTACATA 1.27986142949  
CCTACATC 1.44518868778  
CCTACCAA -0.208403864648  
CCTACCAC 0.83870499413  
CCTACCAG -0.990678258793  
CCTACCCA -0.210325139332  
CCTACCCC -0.984485171723  
CCTACCCG -0.984897155969  
CCTACCGA -0.0301121137625  
CCTACCGC -0.851838110904  
CCTACCTA -0.224187711788  
CCTACCTC -0.743179608226  
CCTACGAA 0.102523080912  
CCTACGAC -1.29731632137  
CCTACGAG -0.0269915256695  
CCTACGCA -1.01211996739  
CCTACGCC -1.41546087059  
CCTACGCG 0.801132405686  
CCTACGGA 0.309109759872  
CCTACGGC -0.927561398076  
CCTACGTA -0.631911386246  
CCTACGTC -0.715976365539  
CCTACTAA -0.190997686421



CCTACTAC -0.5648381028  
CCTACTAG 0.0393294025154  
CCTACTCA -0.518805368958  
CCTACTCC -0.498228639919  
CCTACTCG -0.105460056016  
CCTACTGA -0.911375559235  
CCTACTGC -0.995859809003  
CCTACTTA 0.361630152642  
CCTACTTC -0.560922482958  
CCTAGAAA 0.433556481427  
CCTAGAAC -0.00158923078732  
CCTAGAAG -0.255863658623  
CCTAGACA -0.693493766988  
CCTAGACC -1.18796604323  
CCTAGACG -0.809385830338  
CCTAGAGA 0.356600156011  
CCTAGAGC -0.968319526147  
CCTAGAGG -0.522437658554  
CCTAGATA 2.91612462137  
CCTAGATC 1.35617719123  
CCTAGCAA -0.0865574943853  
CCTAGCAC -0.58581682354  
CCTAGCAG -0.471641395909  
CCTAGCCA 0.499047195782  
CCTAGCCC -1.17018160559  
CCTAGCCG -0.942952621524  
CCTAGCGA -0.477552818157  
CCTAGCGC -1.06975799972  
CCTAGCTA -0.35462163238  
CCTAGCTC 0.340664755294  
CCTAGGAA -0.545564567989  
CCTAGGAC -1.32497755564  
CCTAGGAG -0.719778736554  
CCTAGGCA -0.407700983057  
CCTAGGCC -0.469211958748  
CCTAGGCG 0.218173865969  
CCTAGGGA -1.16381822892  
CCTAGGGC -0.869911291416  
CCTAGGTA -0.373241904654  
CCTAGGTC -1.01223446528  
CCTAGTAA 0.197384795379  
CCTAGTAC -0.473523116775  
CCTAGTAG 0.326455566482  
CCTAGTCA -0.0317679615071  
CCTAGTCC -0.867219966342  
CCTAGTCG -0.367317367193  
CCTAGTGA -0.683407126943  
CCTAGTGC -0.989074663725  
CCTAGTTA 0.0352936639716  
CCTAGTTC 0.373896416259  
CCTATAAA 0.364225924019  
CCTATAAC -0.27888356457  
CCTATAAG 0.825465706581  
CCTATACA 0.12982874717

CCTATACC -0.93385357787  
CCTATACG 0.585699411153  
CCTATAGA 0.45816270367  
CCTATAGC -0.774058233353  
CCTATAGG 1.09399491421  
CCTATATA 1.05042638325  
CCTATATC 3.18511244512  
CCTATCAA 0.99631405338  
CCTATCAC -0.260957774076  
CCTATCAG 0.274527648275  
CCTATCCA 0.862532214329  
CCTATCCC -0.0114797671648  
CCTATCCG -0.353563671827  
CCTATCGA -0.0925274146483  
CCTATCGC 0.00208261262724  
CCTATCTA -0.150996701705  
CCTATCTC 0.365354873267  
CCTATGAA -0.592741448073  
CCTATGAC -0.834284126302  
CCTATGAG -0.751958265951  
CCTATGCA -0.536454699079  
CCTATGCC 0.139826078857  
CCTATGCG -0.0244392634934  
CCTATGGA -0.495046014785  
CCTATGGC -0.966612466617  
CCTATGTA -0.0384889879636  
CCTATGTC 0.230732411486  
CCTATTAA 1.35275391234  
CCTATTAC -0.297866066549  
CCTATTAG 0.945945804686  
CCTATTCA -0.163377255039  
CCTATTCC -0.0522324826082  
CCTATTCCG 0.130840492209  
CCTATTGA -0.266815278223  
CCTATTGC -0.644749514806  
CCTATTTA 0.292038748211  
CCTATTTTC -0.490767540703  
CCTCAAAA -0.656571318411  
CCTCAAAC -0.768213219885  
CCTCAAAG 1.25654237177  
CCTCAACA -0.244583325974  
CCTCAACC -0.668816347873  
CCTCAACG -0.092658150427  
CCTCAAGA 0.208941172045  
CCTCAAGC -1.30472766605  
CCTCAAGG -0.946243291036  
CCTCAATA 1.67442804671  
CCTCAATC 0.255880937396  
CCTCACAA 0.695729182261  
CCTCACAC -0.918595796515  
CCTCACAG -0.425164618411  
CCTCACCA -0.276969367938  
CCTCACCC -0.930008946723  
CCTCACCG -0.571658846515

CCTCACGA 0.144815272602  
CCTCACGC -0.0110950542365  
CCTCACTA -1.10176411685  
CCTCACTC -0.891707943485  
CCTCAGAA -0.238436870774  
CCTCAGAC -0.821630651621  
CCTCAGAG 0.693997557728  
CCTCAGCA -0.84613778114  
CCTCAGCC -1.41934880276  
CCTCAGCG -0.611005319625  
CCTCAGGA -0.352756357576  
CCTCAGGC -0.864247809157  
CCTCAGTA -0.850228478673  
CCTCAGTC -0.607333892567  
CCTCATAA 0.079683457105  
CCTCATAC -0.906924921954  
CCTCATAG 0.389622598095  
CCTCATCA 1.03246374525  
CCTCATCC -0.378236302849  
CCTCATCG -0.308620541592  
CCTCATGA 0.353406705621  
CCTCATGC -0.999811443638  
CCTCATA 0.362134359738  
CCTCATTC -0.0917677731572  
CCTCCAAA -0.471155508477  
CCTCCAAC -0.889737538795  
CCTCCAAG -0.255378395725  
CCTCCACA -0.583318063108  
CCTCCACC -1.4489569176  
CCTCCACG -1.06151165312  
CCTCCAGA -0.442152567053  
CCTCCAGC -0.978101809969  
CCTCCAGG -1.48024586155  
CCTCCATA 0.77360773618  
CCTCCATC -1.01749408224  
CCTCCCAA -1.20224039175  
CCTCCCAC -1.21945379716  
CCTCCCAG 0.141690312771  
CCTCCCCA -0.675776154485  
CCTCCCCC -1.47958219012  
CCTCCCCG -1.58567177638  
CCTCCCGA -0.584948096782  
CCTCCCGC -0.768715553379  
CCTCCCTA -1.29888973063  
CCTCCCTC -1.05080006275  
CCTCCGAA -0.196390537291  
CCTCCGAC -0.630829068869  
CCTCCGAG -0.770582493607  
CCTCCGCA -0.96206398568  
CCTCCGCC -1.7395088586  
CCTCCGCG -0.678151881725  
CCTCCGGA -0.56424937544  
CCTCCGGC -1.48913943353  
CCTCCGTA -0.746777548454

CCTCCGTC -0.527913988799  
CCTCCTAA -0.903039904276  
CCTCCTAC -1.47626216751  
CCTCCTAG -0.740015302755  
CCTCCTCA -0.59954428848  
CCTCCTCC -0.648421982755  
CCTCCTCG -0.861338729903  
CCTCCTGA -0.354981363949  
CCTCCTGC -1.04155321272  
CCTCCTTA -0.93792387396  
CCTCCTTC -1.01467826672  
CCTCGAAA 0.788590722586  
CCTCGAAC -0.803052847657  
CCTCGAAG -0.148784394189  
CCTCGACA -0.059830979299  
CCTCGACC -1.18356932405  
CCTCGACG -0.901104265311  
CCTCGAGA 0.681798535602  
CCTCGAGC -0.908682776914  
CCTCGAGG -0.0232638905532  
CCTCGATA 1.61610614967  
CCTCGATC 0.146867074887  
CCTCGCAA -1.04141581524  
CCTCGCAC -0.786601790055  
CCTCGCAG -0.432102149978  
CCTCGCCA 0.269466841301  
CCTCGCCC -1.28829180544  
CCTCGCCG -1.45686039505  
CCTCGCGA 0.229068861155  
CCTCGCGC -0.657603048537  
CCTCGCTA -0.899948044746  
CCTCGCTC 0.0823244031056  
CCTCGGAA -0.902308366814  
CCTCGGAC -1.32417607037  
CCTCGGAG -0.424131431039  
CCTCGGCA -0.878833383777  
CCTCGGCC 0.335073510797  
CCTCGGCG 0.11243422691  
CCTCGGGA -1.04281393864  
CCTCGGGC -1.09468606514  
CCTCGGTA -0.780304405811  
CCTCGGTC -1.15412379621  
CCTCGTAA -0.11951456858  
CCTCGTAC -0.88275837163  
CCTCGTAG 0.815659274112  
CCTCGTCA -0.235177636139  
CCTCGTCC -0.583313899548  
CCTCGTCG -0.365938187999  
CCTCGTGA -0.955052134569  
CCTCGTGC -0.364430354806  
CCTCGTTA -0.722776083276  
CCTCGTTC -1.08655754728  
CCTCTAAA 0.503386874193  
CCTCTAAC -0.476456344675

CCTCTAAG 0.213967005116  
CCTCTACA -0.855709597012  
CCTCTACC -1.33590065486  
CCTCTACG -0.609544742837  
CCTCTAGA 0.317801191018  
CCTCTAGC -0.526961782666  
CCTCTATA 0.242284208236  
CCTCTATC 0.862239099717  
CCTCTCAA 0.0502866429214  
CCTCTCAC -0.483949295124  
CCTCTCAG -0.450489679258  
CCTCTCCA -0.704445594766  
CCTCTCCC -0.779618251151  
CCTCTCCG -0.681788543059  
CCTCTCGA -0.589139136107  
CCTCTCGC -1.37653200253  
CCTCTCTA -0.726954423744  
CCTCTCTC -0.93792387396  
CCTCTGAA -0.570622536473  
CCTCTGAC -1.32679182684  
CCTCTGAG 0.306725289157  
CCTCTGCA -1.05760415222  
CCTCTGCC -0.642127721181  
CCTCTGCG -0.448560285633  
CCTCTGGA -1.00092935945  
CCTCTGGC -0.996414811528  
CCTCTGTA -0.357005894917  
CCTCTGTC -0.758981358673  
CCTCTTAA 0.417540932183  
CCTCTTAC -1.43072031737  
CCTCTTAG 0.546080849408  
CCTCTTCA -1.02819984363  
CCTCTTCC -1.78287046063  
CCTCTTCG -0.0247769281956  
CCTCTTGA -0.218713463323  
CCTCTTGC -1.42506370498  
CCTCTTTA -1.03502142006  
CCTCTTTC -0.488536497168  
CCTGAAAA -0.983971180262  
CCTGAAAC 0.55812165626  
CCTGAAAG 0.0876566741806  
CCTGAACA -0.436902734463  
CCTGAACC -1.35481862166  
CCTGAACG -0.308587233113  
CCTGAAGA 1.54199998914  
CCTGAAGC -0.944669881776  
CCTGAAGG -0.840264039109  
CCTGAATA -0.807796391372  
CCTGAATC 0.618196620165  
CCTGACAA 1.25229720617  
CCTGACAC -0.0885709919193  
CCTGACAG -0.578810593236  
CCTGACCA -1.02997976546  
CCTGACCC -1.40337655454

CCTGACCG -0.423133425747  
CCTGACGA 0.877687572112  
CCTGACGC -0.832102837307  
CCTGACTA -1.05015221284  
CCTGACTC -1.14538927222  
CCTGAGAA 0.069314735881  
CCTGAGAC -0.617937646743  
CCTGAGAG -0.596539030994  
CCTGAGCA -0.298669633597  
CCTGAGCC -1.00789790954  
CCTGAGCG -0.834950295875  
CCTGAGGA 0.0238601123209  
CCTGAGGC -0.699038587793  
CCTGAGTA -0.497932402637  
CCTGAGTC -0.161418300139  
CCTGATAA 0.357000898645  
CCTGATAC 2.13853444022  
CCTGATAG 0.450449709084  
CCTGATCA -0.117075138875  
CCTGATCC -0.0308432348687  
CCTGATCG 0.980912212855  
CCTGATGA 0.972446863007  
CCTGATGC -0.131840371102  
CCTGATTA 0.983273783991  
CCTGATTC 5.50820854097  
CCTGCAAA 0.762547655846  
CCTGCAAC 0.0291848889882  
CCTGCAAG -0.626601390217  
CCTGCACA -0.136272896898  
CCTGCACC -1.12874564998  
CCTGCACG -0.613350028344  
CCTGCAGA -0.212127128027  
CCTGCAGC -0.164575943914  
CCTGCAGG -0.749018584532  
CCTGCATA -0.433367872167  
CCTGCATC -0.562715103643  
CCTGCCAA -0.875753598571  
CCTGCCAC -0.107061777483  
CCTGCCAG -0.813957835388  
CCTGCCCA -0.816987033342  
CCTGCCCC -1.51093004844  
CCTGCCCG -0.380515227322  
CCTGCCGA -0.116520969062  
CCTGCCGC -1.17182912621  
CCTGCCTA -1.01553866636  
CCTGCCTC -1.23524409782  
CCTGCGAA -0.104218274297  
CCTGCGAC -0.997275835701  
CCTGCGAG -0.241342827358  
CCTGCGCA 0.746298947251  
CCTGCGCC -1.124006478  
CCTGCGCG 0.29801012572  
CCTGCGGA 0.709719576004  
CCTGCGGC -1.21875806631

CCTGCGTA -0.857960417457  
CCTGCGTC -0.867219966342  
CCTGCTAA -0.859313990758  
CCTGCTAC -0.434840315101  
CCTGCTAG -0.849631007838  
CCTGCTCA -0.0578522474895  
CCTGCTCC -1.09578815943  
CCTGCTCG -0.754868386094  
CCTGCTGA -0.0644235939701  
CCTGCTGC -0.547554749588  
CCTGCTTA -0.543627263599  
CCTGCTTC -0.134236916141  
CCTGGAAA 0.268465505162  
CCTGGAAC -0.25353497961  
CCTGGAAG -0.876305270248  
CCTGGACA -0.210513332237  
CCTGGACC -0.572905832684  
CCTGGACG -0.293610492047  
CCTGGAGA 0.602422973747  
CCTGGAGC -0.604253691004  
CCTGGATA 2.92468802306  
CCTGGATC 1.19873384166  
CCTGGCAA -0.0803741916809  
CCTGGCAC -0.327926968526  
CCTGGCAG -0.741634094817  
CCTGGCCA -0.917266788217  
CCTGGCCC -1.52110995222  
CCTGGCCG -1.29944556587  
CCTGGCGA 0.131333874049  
CCTGGCGC -0.401069681315  
CCTGGCTA -1.22495344334  
CCTGGCTC -0.920946958751  
CCTGGGAA -0.612327666228  
CCTGGGAC -0.743784157113  
CCTGGGAG -0.845956666287  
CCTGGGCA -1.06012914308  
CCTGGGCC -1.63419640078  
CCTGGGCG -0.630229099897  
CCTGGGGA -0.727272311537  
CCTGGGGC -1.4427858974  
CCTGGGTA -0.804066882654  
CCTGGGTC -1.34970910103  
CCTGGTAA 0.0966443426088  
CCTGGTAC -1.29583513496  
CCTGGTAG -1.12227297987  
CCTGGTCA -0.888894626108  
CCTGGTCC -1.71579051549  
CCTGGTCG -0.517692449415  
CCTGGTGA -0.681404038308  
CCTGGTGC -0.958916542626  
CCTGGTTA -0.806231933766  
CCTGGTTC -0.678484550155  
CCTGTAAA 0.946056971733  
CCTGTAAC 0.718211572634

CCTGTAAG 0.268324152306  
CCTGTACA -0.141199637245  
CCTGTACC -1.3043412877  
CCTGTACG -0.531939734799  
CCTGTAGA 1.17609510962  
CCTGTAGC -0.0868826684081  
CCTGTATA 0.548514866485  
CCTGTATC 1.17380119633  
CCTGTCAA 0.442738796277  
CCTGTCAC -0.722708217251  
CCTGTCAG -0.644690392256  
CCTGTCCA -1.06435161728  
CCTGTCCC -0.754563197159  
CCTGTCCG -1.29011794278  
CCTGTCGA -0.602559122153  
CCTGTCGC -0.245518253334  
CCTGTCTA -0.616652980357  
CCTGTCTC -1.45941182452  
CCTGTGAA -0.58307324579  
CCTGTGAC -1.29740979329  
CCTGTGAG -0.380935330509  
CCTGTGCA -0.571274966298  
CCTGTGCC -0.606294876211  
CCTGTGCG 0.464810243295  
CCTGTGGA -0.649910039038  
CCTGTGGC -1.16736058563  
CCTGTGTA 0.454120511608  
CCTGTGTC 0.194650169282  
CCTGTTAA 0.891102561886  
CCTGTTAC -0.714649230843  
CCTGTTAG -0.0549879265041  
CCTGTTCA -0.340383506827  
CCTGTTCC -1.19877672633  
CCTGTTCCG -0.13139799287  
CCTGTTGA 0.257328190793  
CCTGTTGC -0.723463070649  
CCTGTTTA -0.734070155673  
CCTGTTTC 0.0746084940276  
CCTTAAAA -0.112078034367  
CCTTAAAC 0.744559620132  
CCTTAAAG -0.488384735412  
CCTTAAACA -0.631033916012  
CCTTAAACC -0.768285874004  
CCTTAAACG -0.35462163238  
CCTTAAAGA -0.119539341761  
CCTTAAAGC 0.723698311779  
CCTTAAAGG 0.441307364408  
CCTTAAATA 0.585886771346  
CCTTAAATC 0.644428712521  
CCTTACAA -0.120222373751  
CCTTACAC -0.0269915256695  
CCTTACAG 0.308843083865  
CCTTACCA -0.275574783573  
CCTTACCC -0.966722592774



CCTTACCG -0.569328085722  
CCTTACGA 0.0253779380572  
CCTTACGC -0.0701164293264  
CCTTACTA -0.492587640883  
CCTTACTC -0.297931018083  
CCTTAGAA 0.0209489512874  
CCTTAGAC -0.696989283644  
CCTTAGAG -0.24383846512  
CCTTAGCA -0.792892096247  
CCTTAGCC -0.674559145947  
CCTTAGCG -0.187499255273  
CCTTAGGA -0.516339708826  
CCTTAGGC 0.151409102306  
CCTTAGTA 0.13041955631  
CCTTAGTC -0.0294061821932  
CCTTATAA 0.48242293409  
CCTTATAC 0.0439638609628  
CCTTATAG -0.127838357393  
CCTTATCA -0.0155646357146  
CCTTATCC -0.0408732505005  
CCTTATCG 0.442047645346  
CCTTATGA 0.14766585384  
CCTTATGC -0.610002942596  
CCTTATTA -0.0226478918763  
CCTTATTC 0.0430949260261  
CCTTCAAA 0.333700160587  
CCTTCAAC -0.496887557298  
CCTTCAAG -1.14674013921  
CCTTCACA -0.37737382143  
CCTTCACC -1.24009631044  
CCTTCACG -0.278128294817  
CCTTCAGA -0.443173263746  
CCTTCAGC -0.865348029842  
CCTTCATA -0.452494433316  
CCTTCATC -0.710375753033  
CCTTCCAA -0.567515688127  
CCTTCCAC -0.628757489675  
CCTTCCAG -0.877650516429  
CCTTCCCA -0.602533724438  
CCTTCCCC -1.40490249922  
CCTTCCCG -1.04935114393  
CCTTCCGA 0.301592452598  
CCTTCCGC -0.630898808496  
CCTTCCTA -1.07896883496  
CCTTCCTC -1.46570754334  
CCTTCGAA -0.543526089096  
CCTTCGAC -1.23261585067  
CCTTCGAG -0.538958663961  
CCTTCGCA -0.483302486105  
CCTTCGCC -1.54916922281  
CCTTCGCG -0.600573936826  
CCTTCGGA -1.03310826431  
CCTTCGGC -0.949615149965  
CCTTCGTA -0.0493796114124

CCTTCGTC -1.3365576646  
CCTTCTAA 0.128957522276  
CCTTCTAC -0.379617147466  
CCTTCTAG -0.552538530705  
CCTTCTCA -0.643961977464  
CCTTCTCC -0.766696851395  
CCTTCTCG -1.01205418314  
CCTTCTGA -0.145808281622  
CCTTCTGC -1.01472947851  
CCTTCTTA -0.508489316766  
CCTTCTTC -1.10516616159  
CCTTGAAA -0.194349143906  
CCTTGAAC -0.570045883436  
CCTTGAAG -0.138307212231  
CCTTGACA -0.0741288519351  
CCTTGACC -0.771805747485  
CCTTGACG 0.689156170357  
CCTTGAGA 0.313223565162  
CCTTGAGC -0.578090297385  
CCTTGATA 0.514521690426  
CCTTGATC -0.150139424736  
CCTTGCAA 1.55128535209  
CCTTGCAC -0.0913911791706  
CCTTGCAg -0.171117312764  
CCTTGCCA -0.176588230381  
CCTTGCCC -1.16397810962  
CCTTGCCG -0.0881098776681  
CCTTGCGA -0.186268298809  
CCTTGCGC 0.60494858914  
CCTTGCTA 0.481812556219  
CCTTGCTC -0.933745949848  
CCTTGCAA -0.753859555547  
CCTTGAC -0.654208290029  
CCTTGAG -1.03709237472  
CCTTGCA -0.451757899582  
CCTTGCC 0.181555981793  
CCTTGCG -0.606001553421  
CCTTGGA -0.425208543967  
CCTTGGC -0.500379118572  
CCTTGGTA -0.836788091184  
CCTTGGTC -0.158033325996  
CCTTGTA 1.72283900593  
CCTTGTAC -0.682787172884  
CCTTGTAG 0.0882141748419  
CCTTGTCA -0.406096971633  
CCTTGTCC -0.354283967677  
CCTTGTCC -0.220443214254  
CCTTGTGA -0.506724175575  
CCTTGTGC -0.181952769045  
CCTTGTTA 0.855581983904  
CCTTGTTTC -1.39415218773  
CCTTTAAA 1.19979513306  
CCTTTAAC 0.65354586766  
CCTTTAAG -0.263380965897

CCTTTACA 0.52701216174  
CCTTTACC -1.00964785374  
CCTTTACG 0.193839107827  
CCTTTAGA 0.408814527134  
CCTTTAGC -0.614639274645  
CCTTTATA 0.102523080912  
CCTTTATC 0.685079628927  
CCTTTCAA 0.563326314226  
CCTTTCAC -0.204899812695  
CCTTTCAG -0.0172038292198  
CCTTTCCA -0.687299639028  
CCTTTCCC -1.13156396363  
CCTTTCCG -0.285133276054  
CCTTTCGA -0.683974828326  
CCTTTCGC -0.506159388684  
CCTTTCTA 0.38512782708  
CCTTTCTC -0.669027232178  
CCTTTGAA 0.594411035565  
CCTTTGAC -1.05709744699  
CCTTTGAG -0.354802539054  
CCTTTGCA -0.94672272495  
CCTTTGCC 0.13790417964  
CCTTTGCG -0.803476281692  
CCTTTGGA -0.390486744938  
CCTTTGGC -0.949125515329  
CCTTTGTA -0.594468700868  
CCTTTGTC -0.976104966675  
CCTTTTAA 1.39178353855  
CCTTTTAC -0.405542801819  
CCTTTTAG 0.154970611385  
CCTTTTCA 0.283767003895  
CCTTTTCC -0.695874074143  
CCTTTTCG -0.318218587891  
CCTTTTGA -0.0532061310746  
CCTTTTGC -0.114068215966  
CCTTTTTA 0.305752265225  
CCTTTTTC -0.278505305159  
CGAAAAAA 1.36946019616  
CGAAAAAC 1.4861223099  
CGAAAAAG 0.318355777188  
CGAAAACA -0.532691881883  
CGAAAACC -0.258263950865  
CGAAAACG -0.291007642619  
CGAAAAGA -0.0678483301087  
CGAAAAGC 0.117881412236  
CGAAAATA 1.53754789461  
CGAAAATC 6.98600498027  
CGAAACAA 0.580356523001  
CGAAACAC -0.162800602002  
CGAAACAG -0.65571216784  
CGAAACCA 0.330093060528  
CGAAACCC -0.833372306699  
CGAAACCG 0.79408370707  
CGAAACGA 0.446794519908

CGAAACGC 0.176976690513  
CGAAACTA 0.959685968483  
CGAAACTC 0.0500845020917  
CGAAAGAA 0.817658199187  
CGAAAGAC 0.132855030633  
CGAAAGAG -0.353947552043  
CGAAAGCA -0.415593843428  
CGAAAGCC -0.81955678247  
CGAAAGCG -0.488638712561  
CGAAAGGA -0.557272498232  
CGAAAGGC -0.524758218625  
CGAAAGTA 0.0998796367751  
CGAAAGTC -0.429498676016  
CGAAATAA 2.92725777218  
CGAAATAC 1.10233639815  
CGAAATAG 1.13967915809  
CGAAATCA 6.78143450516  
CGAAATCC 18.9608677062  
CGAAATCG 10.9131160399  
CGAAATGA 0.270085962648  
CGAAATGC 1.70900474568  
CGAAATTA 2.64332464225  
CGAAATTC 2.46407090087  
CGAACAAA 0.194983254069  
CGAACAAC 0.894248547694  
CGAACAAAG -0.281464971665  
CGAACACA 0.0988349996136  
CGAACACC -0.33333085283  
CGAACACG 0.647683367241  
CGAACAGA 0.970152117007  
CGAACAGC -0.408591776683  
CGAACATA -0.195875921296  
CGAACATC 0.684576254543  
CGAACCAA -0.367054646568  
CGAACCCAC -0.805415667861  
CGAACCCAG -0.699258215574  
CGAACCCA 0.586062265392  
CGAACCCC -0.816915420113  
CGAACCCG 0.760203571661  
CGAACCGA -0.203635547752  
CGAACCGC -0.985673035343  
CGAACCTA 0.655893699048  
CGAACCTC -0.729281645512  
CGAACGAA -0.246969462113  
CGAACGAC -0.514534805639  
CGAACGAG -0.52238311592  
CGAACGCA 0.667456112876  
CGAACGCC -0.989474990002  
CGAACGCG 0.845465990761  
CGAACGGA -0.554466258906  
CGAACGGC -0.0772419456204  
CGAACGTA -0.0203831235064  
CGAACGTC -0.307133526198  
CGAACTAA -0.1346516067

CGAACTAC 0.105322450364  
CGAACTAG -0.184918889068  
CGAACTCA 0.346745842604  
CGAACTCC -0.374443508021  
CGAACTCG -0.0073001776289  
CGAACTGA -0.328467398592  
CGAACTGC 0.125509262024  
CGAACTTA 1.17614299056  
CGAACTTC -0.991499729148  
CGAAGAAA 0.551262399617  
CGAAGAAC -0.442689249915  
CGAAGAAG -0.626543308557  
CGAAGACA -0.389162316556  
CGAAGACC -1.03714275379  
CGAAGACG -0.439162506561  
CGAAGAGA -0.738246830717  
CGAAGAGC 0.469511735056  
CGAAGATA 2.13908861003  
CGAAGATC 3.44567176652  
CGAAGCAA -0.142149553421  
CGAAGCAC 0.112558092815  
CGAAGCAG -0.328137228297  
CGAAGCCA -0.317082352413  
CGAAGCCC -1.29578392318  
CGAAGCCG -0.678126900366  
CGAAGCGA 0.261288360726  
CGAAGCGC -0.0946348004566  
CGAAGCTA -0.63360470603  
CGAAGCTC -1.03371156413  
CGAAGGAA 0.549555756442  
CGAAGGAC -0.670092270783  
CGAAGGAG -1.31715755757  
CGAAGGCA -0.569337870087  
CGAAGGCC -1.68748955025  
CGAAGGCG -0.309416614231  
CGAAGGGA -1.01835822908  
CGAAGGGC -0.578759797806  
CGAAGGTA -0.65920310458  
CGAAGGTC -1.47916541778  
CGAAGTAA -0.581539598527  
CGAAGTAC -0.0354381394977  
CGAAGTAG 0.153634941391  
CGAAGTCA -0.980313909307  
CGAAGTCC -0.752365253924  
CGAAGTCG -0.0869646905367  
CGAAGTGA 0.287499218927  
CGAAGTGC -0.232810652375  
CGAAGTTA 0.222829558571  
CGAAGTTC -1.03617222799  
CGAATAAA 0.879865946615  
CGAATAAC 0.511399020553  
CGAATAAG -0.282974053926  
CGAATACA 1.42163001719  
CGAATACC 0.766551334979

CGAATACG 1.70963677406  
CGAATAGA 0.0433859588583  
CGAATAGC 0.62877351938  
CGAATATA 1.95036048007  
CGAATATC 5.54388088071  
CGAATCAA 3.94945209711  
CGAATCAC 3.1939700023  
CGAATCAG 3.19584735143  
CGAATCCA 6.69331671673  
CGAATCCC 3.51676455062  
CGAATCCG 9.77824829152  
CGAATCGA 4.28962326239  
CGAATCGC 3.18927975215  
CGAATCTA 8.95001194404  
CGAATCTC 11.5335595251  
CGAATGAA 0.729790848879  
CGAATGAC 0.0955141442928  
CGAATGAG 0.367695626604  
CGAATGCA -0.348116902856  
CGAATGCC -0.881344218533  
CGAATGCG 0.462442843176  
CGAATGGA -0.248651123928  
CGAATGGC 0.0870573297429  
CGAATGTA 0.801382427453  
CGAATGTC -0.40867712966  
CGAATTAA 0.202691876917  
CGAATTAC 1.09479181956  
CGAATTAG 0.595568505198  
CGAATTCA 0.491844029097  
CGAATTCC 1.21854614112  
CGAATTCCG 2.82092503403  
CGAATTGA 0.177885179268  
CGAATTGC 1.91896911255  
CGAATTTA 3.52691739127  
CGAATTTTC 3.40389398264  
CGACAAAA 1.06991954584  
CGACAAAC 0.640920913364  
CGACAAAG -0.0764190180199  
CGACAACA 0.741600786338  
CGACAACC -0.423824160323  
CGACAACG 0.25136659765  
CGACAAGA -0.270286229876  
CGACAAGC -0.757842833237  
CGACAATA 0.278138703716  
CGACAATC 2.96726000597  
CGACACAA 0.265528530058  
CGACACAC -0.854348321126  
CGACACAG -0.280589375033  
CGACACCA -0.760561221451  
CGACACCC 0.577991204661  
CGACACCG -0.375602643078  
CGACACGA 1.18213830853  
CGACACGC -1.01931730509  
CGACACTA -0.945504467344

CGACACTC -0.379202873263  
CGACAGAA 1.02140720394  
CGACAGAC 0.0970844308829  
CGACAGAG -0.516735455188  
CGACAGCA -0.589566525524  
CGACAGCC -0.757328217242  
CGACAGCG 0.310494559872  
CGACAGGA -0.0751435114658  
CGACAGGC -0.0429646066034  
CGACAGTA 0.385945133875  
CGACAGTC -0.58517834164  
CGACATAA 0.366084120771  
CGACATAC 0.0510635631858  
CGACATAG -0.581833962207  
CGACATCA 0.589962480064  
CGACATCC 1.87819224846  
CGACATCG -0.181121930681  
CGACATGA 0.412836734108  
CGACATGC -0.335776944231  
CGACATTA 1.80279642527  
CGACATTC 0.193742929595  
CGACCAAA -0.425349272289  
CGACCAAC -0.636167793461  
CGACCAAG -0.976549218508  
CGACCACA -0.395089768509  
CGACCACC -1.13472743639  
CGACCACG -0.760540403652  
CGACCAGA 0.0551176213928  
CGACCAGC -0.257699996686  
CGACCATA -1.06112902197  
CGACCATC -0.815716731238  
CGACCCAA -0.656517192133  
CGACCCAC -0.987252273587  
CGACCCAG -1.33410595239  
CGACCCCA -0.436694972827  
CGACCCCC -1.35312946543  
CGACCCCG -0.379849265927  
CGACCCGA 0.0437894078059  
CGACCCGC -0.946589282858  
CGACCCTA -0.640293256719  
CGACCCTC -1.10175578973  
CGACCGAA 0.580953369302  
CGACCGAC -0.759494517422  
CGACCGAG -0.970402555131  
CGACCGCA -0.439254729411  
CGACCGCC -0.656348151604  
CGACCGCG -0.339837664133  
CGACCGGA -0.0888861733985  
CGACCGGC -0.96672821358  
CGACCGTA -1.01145442235  
CGACCGTC -0.668509909869  
CGACCTAA 0.0153901825577  
CGACCTAC -1.30568653388  
CGACCTAG -0.693476280037

CGACCTCA -0.943000294284  
CGACCTCC -0.506795996982  
CGACCTCG -0.623862808738  
CGACCTGA -0.808119899971  
CGACCTGC -0.293653584891  
CGACCTTA -0.824382972847  
CGACCTTC -0.937515845097  
CGACGAAA 1.13120631384  
CGACGAAC -0.8275616426  
CGACGAAG -0.881100025749  
CGACGACA -0.434042785215  
CGACGACC -1.26223354171  
CGACGACG 0.527985185672  
CGACGAGA 0.369499280722  
CGACGAGC -0.598601034  
CGACGATA 0.790762435394  
CGACGATC 2.08454951528  
CGACGCAA 0.0200825144867  
CGACGCAC -1.10726834295  
CGACGCAG -0.241238322006  
CGACGCCA -0.800079025048  
CGACGCCC -1.43303942019  
CGACGCCG -0.570873807309  
CGACGCGA 0.224335934518  
CGACGCGC 0.0381746391964  
CGACGCTA -0.484489517012  
CGACGCTC -1.25363891333  
CGACGGAA 1.05444296942  
CGACGGAC -0.94029543764  
CGACGGAG 0.208871224239  
CGACGGCA -0.842969728465  
CGACGGCC -0.7195522389  
CGACGGCG -0.926037327  
CGACGGGA -1.04647662222  
CGACGGGC -0.514626820312  
CGACGGTA -0.468566190618  
CGACGGTC -0.992069928667  
CGACGTAA 1.19677905032  
CGACGTAC -0.554380073218  
CGACGTAG -0.416095136032  
CGACGTCA -0.397768186548  
CGACGTCC -1.07947783015  
CGACGTCCG -0.785766996309  
CGACGTGA -0.852150794247  
CGACGTGC -0.351219171286  
CGACGTTA 1.46369779301  
CGACGTTC -0.593954293051  
CGACTAAA -0.109938797326  
CGACTAAC -0.188475193697  
CGACTAAG -0.305507447906  
CGACTACA -0.0658312935488  
CGACTACC -0.00280998652964  
CGACTACG 0.377976704893  
CGACTAGA -0.173128312162



CGACTAGC -0.952656422243  
CGACTATA 0.111405203098  
CGACTATC 0.591210090767  
CGACTCAA 1.09414188787  
CGACTCAC -0.626725047944  
CGACTCAG -0.277694451882  
CGACTCCA -0.237641422668  
CGACTCCC -0.518035110389  
CGACTCCG 0.17352967933  
CGACTCGA -0.086270000579  
CGACTCGC -0.917289687796  
CGACTCTA -0.552106145016  
CGACTCTC -0.0115130756434  
CGACTGAA 1.11788229785  
CGACTGAC -0.704713311664  
CGACTGAG 1.28593564693  
CGACTGCA -0.291631135703  
CGACTGCC -0.231522655141  
CGACTGCG 0.10270148945  
CGACTGGA -0.146626004773  
CGACTGGC -0.542583875506  
CGACTGTA -0.580336954269  
CGACTGTC -1.30212835565  
CGACTTAA -0.231581361335  
CGACTTAC -1.22482104214  
CGACTTAG -0.946751453513  
CGACTTCA -0.975551837751  
CGACTTCC -0.214982913715  
CGACTTGA -0.557387620661  
CGACTTGC -1.07352518866  
CGACTTTA 0.811713676639  
CGACTTTC -0.369222820349  
CGAGAAAA 0.717440064998  
CGAGAAAC 0.0380428625277  
CGAGAAAG -0.717148407632  
CGAGAACA -0.609940281021  
CGAGAACC -0.469576270233  
CGAGAACG -0.321836513206  
CGAGAAGA -0.560652476103  
CGAGAAGC -0.432426699467  
CGAGAATA 0.714993973597  
CGAGAATC 9.24617136742  
CGAGACAA -0.0880334763452  
CGAGACAC -0.497471288386  
CGAGACAG -0.807086088065  
CGAGACCA -0.322825358666  
CGAGACCC -1.3336319311  
CGAGACCG -0.263734660305  
CGAGACGA -0.644079389851  
CGAGACGC -1.00679831339  
CGAGACTA 1.31065948974  
CGAGACTC -0.631917631586  
CGAGAGAA 1.21206347846  
CGAGAGAC -1.04758662727

CGAGAGAG -0.519994065289  
CGAGAGCA -0.335690758542  
CGAGAGCC -0.0416603714865  
CGAGAGCG 0.0725404538598  
CGAGAGGA -0.896220825986  
CGAGAGGC -1.32046779581  
CGAGAGTA 1.22417839668  
CGAGAGTC -1.14369657697  
CGAGATAA 0.175268590093  
CGAGATAC 3.95769178202  
CGAGATAG 1.12224570855  
CGAGATCA 1.96729242884  
CGAGATCC 10.1352433612  
CGAGATCG 3.91822748016  
CGAGATGA -0.655654918892  
CGAGATGC 0.326266957222  
CGAGATTA 7.0407524612  
CGAGATTC 11.8777004365  
CGAGCAAA 1.51716706106  
CGAGCAAC -0.588282275494  
CGAGCAAG -0.739110769382  
CGAGCACA -0.545524389636  
CGAGCACC -0.949318496327  
CGAGCACG 0.0459865183284  
CGAGCAGA -0.739506515744  
CGAGCAGC -0.862472675423  
CGAGCATA -0.352745115964  
CGAGCATC -1.15217941377  
CGAGCCAA -0.922928396875  
CGAGCCAC -1.16961910866  
CGAGCCAG -1.23942160557  
CGAGCCCA -0.82639147411  
CGAGCCCC -1.17462370757  
CGAGCCCG -0.309616881459  
CGAGCCGA -0.651733261888  
CGAGCCGC -1.58360977337  
CGAGCCTA -0.621235186129  
CGAGCCTC -1.25182172764  
CGAGCGAA -0.500799221758  
CGAGCGAC -0.584021288364  
CGAGCGAG 0.185822173373  
CGAGCGCA -0.503961029094  
CGAGCGCC -0.226313209082  
CGAGCGCG -0.111940220536  
CGAGCGGA -0.862881745176  
CGAGCGGC -1.11663281354  
CGAGCGTA 0.973876629453  
CGAGCGTC -1.2013110852  
CGAGCTAA 0.211303575892  
CGAGCTAC -0.912361698381  
CGAGCTAG -0.399385313186  
CGAGCTCA -1.07052617651  
CGAGCTCC -0.597593660699  
CGAGCTCG -0.0575060474896

CGAGCTGA -0.627440139344  
CGAGCTGC -0.777793779233  
CGAGCTTA -1.12610970025  
CGAGCTTC -0.326927297811  
CGAGGAAA 0.0637778258404  
CGAGGAAC 0.0744107249356  
CGAGGAAG -0.620726399118  
CGAGGACA 0.115560435809  
CGAGGACC -1.0153169568  
CGAGGACG -0.350320675075  
CGAGGAGA -0.877179825991  
CGAGGAGC -0.745406280023  
CGAGGATA 1.94475216498  
CGAGGATC 2.01380876015  
CGAGGCAA -0.49387313998  
CGAGGCAC -1.02293314862  
CGAGGCAG -0.913615762602  
CGAGGCCA -0.571658846515  
CGAGGCCC -1.11765684108  
CGAGGCCG -0.384469568271  
CGAGGCGA 0.0141827502068  
CGAGGCGC -0.0306104918742  
CGAGGCTA -0.135542192148  
CGAGGCTC -1.26564308085  
CGAGGGAA -0.33794532619  
CGAGGGAC -0.914475954063  
CGAGGGAG -0.544691261314  
CGAGGGCA -1.01428605939  
CGAGGGCC -1.72776137454  
CGAGGGCG -1.3096373358  
CGAGGGGA -0.833738283609  
CGAGGGGC -0.588052030635  
CGAGGGTA -0.543777984465  
CGAGGGTC -1.58180591108  
CGAGGTAA 0.494483309674  
CGAGGTAC -0.907875670841  
CGAGGTAG -1.00490347731  
CGAGGTCA -0.642426040243  
CGAGGTCC -0.970376949238  
CGAGGTGA -1.2725410586  
CGAGGTGC -0.101462205867  
CGAGGTTA 0.347189261726  
CGAGGTTC -0.439565122797  
CGAGTAAA 0.63918512527  
CGAGTAAC -0.481755099094  
CGAGTAAG -0.00600801683549  
CGAGTACA 0.130097504957  
CGAGTACC -0.598175518185  
CGAGTACG 0.860547029001  
CGAGTAGA -0.447742354304  
CGAGTAGC -0.859410377168  
CGAGTATA 1.4607957918  
CGAGTATC 3.88322443267  
CGAGTCAA 0.0929169156705

CGAGTCAC -1.2551138544  
CGAGTCAG -0.0432477286719  
CGAGTCCA -0.556508693181  
CGAGTCCC -0.524785489942  
CGAGTCCG -0.727050393799  
CGAGTCGA -0.564626593961  
CGAGTCGC -0.917980422372  
CGAGTCTA -0.604122122513  
CGAGTCTC -0.533431538286  
CGAGTGAA 0.406185655457  
CGAGTGAC -0.834263724859  
CGAGTGAG -0.431271519792  
CGAGTGCA 0.416914524606  
CGAGTGCC -1.04564474296  
CGAGTGCG 0.915860337706  
CGAGTGGA -1.34567565245  
CGAGTGGC -0.920574736502  
CGAGTGTA -0.443108104034  
CGAGTGTC -0.769926732934  
CGAGTTAA -0.0481540675762  
CGAGTTAC -1.20937215339  
CGAGTTAG -0.462850039327  
CGAGTTCA -0.0715428649244  
CGAGTTCC 0.078086315554  
CGAGTTGA -0.900700816363  
CGAGTTGC -0.909603548171  
CGAGTTTA 2.52189899971  
CGAGTTTC 0.390855636339  
CGATAAAA 1.53511366936  
CGATAAAC -0.191728391171  
CGATAAAG 0.662624093515  
CGATAACA 1.01089046817  
CGATAACC 0.0649529906025  
CGATAACG -0.0391559902484  
CGATAAGA 0.557417390114  
CGATAAGC 0.59517338337  
CGATAATA 0.88270133086  
CGATAATC 2.72706548841  
CGATACAA 1.37269320037  
CGATACAC 0.757849078577  
CGATACAG 0.426410147334  
CGATACCA 0.492005991574  
CGATACCC 1.87198708707  
CGATACCG 1.15500334823  
CGATACGA 1.92436716787  
CGATACGC 2.61134267377  
CGATACTA 0.425545375957  
CGATACTC 2.41490217376  
CGATAGAA 3.0541934698  
CGATAGAC -0.235021710823  
CGATAGAG 0.657209592133  
CGATAGCA 0.712740238661  
CGATAGCC -0.00453036945162  
CGATAGCG 1.13589448221

CGATAGGA -0.0306987593426  
CGATAGGC -0.411241049803  
CGATAGTA 2.00468744145  
CGATAGTC 0.469071230426  
CGATATAA 1.75617267411  
CGATATAC 1.35228613639  
CGATATAG 3.82811722018  
CGATATCA 6.10526322885  
CGATATCC 14.758772464  
CGATATCG 10.3661787462  
CGATATGA 3.19282002707  
CGATATGC 2.75048717788  
CGATATTA 3.21262399941  
CGATATTC 5.37371848039  
CGATCAAA 1.81988367481  
CGATCAAC 0.728612145091  
CGATCAAG 0.411565599292  
CGATCACA 1.75735283514  
CGATCACC 0.417579653289  
CGATCACG 1.61127225671  
CGATCAGA 0.28498130612  
CGATCAGC -0.664764787801  
CGATCATA 0.8388055441  
CGATCATC 0.241609711543  
CGATCCAA 2.04962182821  
CGATCCAC 1.48363125205  
CGATCCAG 0.755286615679  
CGATCCCA 2.95495627031  
CGATCCCC 1.79992148721  
CGATCCCG 2.44966623292  
CGATCCGA 2.24692460146  
CGATCCGC 1.92151991748  
CGATCCTA 1.37473730006  
CGATCCTC 5.18062298435  
CGATCGAA 0.708048323088  
CGATCGAC 0.527916695113  
CGATCGAG 0.482894665419  
CGATCGCA 4.89445776999  
CGATCGCC 2.91356070123  
CGATCGCG 6.41418250586  
CGATCGGA 1.02182834802  
CGATCGGC -0.0469528805651  
CGATCGTA 2.44830308343  
CGATCGTC 1.79056138835  
CGATCTAA 2.4647866168  
CGATCTAC 1.9467090381  
CGATCTAG 2.78603315358  
CGATCTCA 3.91418362268  
CGATCTCC 5.52432609743  
CGATCTGA 3.6841009347  
CGATCTGC 4.79574476268  
CGATCTTA 3.58752758079  
CGATCTTC 6.62858377026  
CGATGAAA 0.509014758016

CGATGAAC -0.333238838158  
CGATGAAG -0.303567437203  
CGATGACA 0.774766038525  
CGATGACC -1.09505745468  
CGATGACG 0.121712303637  
CGATGAGA -1.05501691614  
CGATGAGC -0.728503059823  
CGATGATA -0.0821678532559  
CGATGATC 2.10619003385  
CGATGCAA 0.706598987911  
CGATGCAC -0.22925705406  
CGATGCAG 0.600404896297  
CGATGCCA -0.415506200494  
CGATGCCC -0.583266851322  
CGATGCCG 0.399899929181  
CGATGCGA -0.23559003674  
CGATGCGC 0.316094756022  
CGATGCTA 0.730535293377  
CGATGCTC -0.141568528646  
CGATGGAA 1.07130434584  
CGATGGAC -0.40295764752  
CGATGGAG -0.0183194550764  
CGATGGCA 0.47948762441  
CGATGGCC -0.75113117479  
CGATGGCG -0.380138008801  
CGATGGGA 1.01661140755  
CGATGGGC 0.399184629602  
CGATGGTA -0.571229583496  
CGATGGTC -1.20716609121  
CGATGTAA 0.395187195809  
CGATGTAC -0.708368709017  
CGATGTAG -0.18910305852  
CGATGTCA 0.0921895417681  
CGATGTCC -0.52965831219  
CGATGTGA -0.578597210794  
CGATGTGC -0.755643849113  
CGATGTTA 1.54461782738  
CGATGTTC -0.0805328233105  
CGATTAAC 0.779369686629  
CGATTAAC -0.314690595469  
CGATTAAG 0.945184705949  
CGATTACA 7.56189317086  
CGATTACC 6.16452921308  
CGATTACG 10.7078219381  
CGATTAGA 1.64798798454  
CGATTAGC 0.851900147945  
CGATTATA 1.75979122396  
CGATTATC 2.65394234435  
CGATTCAA 0.179246663333  
CGATTCAC 1.04193875836  
CGATTCAG 0.393441831528  
CGATTCCA 2.04549657313  
CGATTCCC 10.1432351061  
CGATTCCG 6.15245072601

CGATTCGA 2.3522331039  
CGATTCGC 7.17491484962  
CGATTCTA 2.74649994481  
CGATTCTC 8.37248247817  
CGATTGAA -0.498526334447  
CGATTGAC -0.133032398282  
CGATTGAG 0.0526611210928  
CGATTGCA 4.44575509061  
CGATTGCC 4.29122290208  
CGATTGCG 6.75084524744  
CGATTGGA 0.130606708325  
CGATTGGC 0.790296116693  
CGATTGTA 0.743882417125  
CGATTGTC 1.97045423617  
CGATTTAA 0.995548166549  
CGATTTAC 1.20681156409  
CGATTTAG 1.68352563312  
CGATTTCA 6.06816632711  
CGATTTCC 16.8523456625  
CGATTTGA 0.942732369209  
CGATTTGC 3.6083788966  
CGATTTTA 3.70480048876  
CGATTTTC 7.84088727795  
CGCAAAA 0.813325182471  
CGCAAAAC 0.595138825823  
CGCAAAAG 0.340717632503  
CGCAAACA 0.224316782143  
CGCAAACC -0.68446675292  
CGCAAACG -0.607081164485  
CGCAAAGA -0.197896496882  
CGCAAAGC 0.1723428566  
CGCAAATA 1.24915913113  
CGCAAATC 7.27730886017  
CGCAACAA 1.48073507983  
CGCAACAC -0.0936034866865  
CGCAACAG 0.164191439164  
CGCAACCA -0.344743170326  
CGCAACCC 0.299369319826  
CGCAACCG -0.163945580956  
CGCAACGA 1.71988267027  
CGCAACGC 0.33255559799  
CGCAACTA 0.950984752971  
CGCAACTC 0.611192887996  
CGCAAGAA 0.459881421168  
CGCAAGAC -0.175790492318  
CGCAAGAG 0.0939580138061  
CGCAAGCA 0.955915032344  
CGCAAGCC -1.08923409172  
CGCAAGCG -0.187756563271  
CGCAAGGA -0.577788231119  
CGCAAGGC 0.142632110005  
CGCAAGTA 1.92035703522  
CGCAAGTC -0.499933409492  
CGCAATAA 0.941534096689

CGCAATAC 1.43404221358  
CGCAATAG 0.426964733503  
CGCAATCA 7.84144998306  
CGCAATCC 16.2641087698  
CGCAATGA 0.962290275157  
CGCAATGC 0.405007576203  
CGCAATTA 1.70349323335  
CGCAATTC 3.92697345394  
CGCACAAA 0.721786196927  
CGCACAAC 0.93188213229  
CGCACAAAG 0.212568881725  
CGCACACA 1.06130451602  
CGCACACC 0.356264781267  
CGCACACG 0.508336930476  
CGCACAGA -0.399724643312  
CGCACAGC -0.264051090852  
CGCACATA 2.09343642556  
CGCACATC 0.162017020042  
CGCACCAA -1.20523732212  
CGCACCCAC -0.38974542311  
CGCACCCAG -0.00421768610835  
CGCACCCA -0.568579685842  
CGCACCCC -1.03025872397  
CGCACCCG -0.39509892834  
CGCACCGA -0.516649894033  
CGCACCGC -0.810641559983  
CGCACCTA 0.116905473812  
CGCACCTC -0.457257545763  
CGCACGAA 0.0410177260267  
CGCACGAC -0.453076915337  
CGCACGAG -0.630509515652  
CGCACGCA 1.33378598282  
CGCACGCC -1.26301150286  
CGCACGCG 0.698679480757  
CGCACGGA -0.160264994066  
CGCACGGC -0.956828101015  
CGCACGTA 0.982039913035  
CGCACGTC 0.111676250843  
CGCACTAA 0.346530586561  
CGCACTAC 0.428568744928  
CGCACTAG -0.713037308655  
CGCACTCA -0.514534805639  
CGCACTCC -0.961913056636  
CGCACTGA 0.525644432335  
CGCACTGC 1.01198590076  
CGCACTTA -0.123558634243  
CGCACTTC -0.104706243509  
CGCAGAAA 0.503336911475  
CGCAGAAC -0.662814160021  
CGCAGAAG -0.757043221572  
CGCAGACA -0.556431250968  
CGCAGACC -0.431977659539  
CGCAGACG -0.699703924653  
CGCAGAGA -0.703496511303



CGCAGAGC -0.33702288951  
CGCAGATA 2.86491554177  
CGCAGATC 4.52698531019  
CGCAGCAA -0.573558470687  
CGCAGCAC -0.307086894328  
CGCAGCAG -0.322891142911  
CGCAGCCA -1.04227975391  
CGCAGCCC -1.21625493414  
CGCAGCCG -0.229405901324  
CGCAGCGA -0.393965607354  
CGCAGCGC -0.0215403849613  
CGCAGCTA -0.201102437952  
CGCAGCTC -0.019510233188  
CGCAGGAA 0.235204699278  
CGCAGGAC -1.32827759316  
CGCAGGAG -0.376044188598  
CGCAGGCA -0.728503059823  
CGCAGGCC -1.20200973054  
CGCAGGCG -0.810431716567  
CGCAGGGA 0.0274228704679  
CGCAGGGC -0.997275835701  
CGCAGGTA -0.290947895535  
CGCAGGTC -0.612390119625  
CGCAGTAA -0.113613971588  
CGCAGTAC -0.501663160423  
CGCAGTAG -0.91814030307  
CGCAGTCA -0.586186339475  
CGCAGTCC -1.09250352708  
CGCAGTGA -1.01937517857  
CGCAGTGC 0.228780950993  
CGCAGTTA 0.488861463012  
CGCAGTTC 0.714309900717  
CGCATAAA 1.00946882066  
CGCATAAC -0.00212175008965  
CGCATAAG 0.315721492883  
CGCATACA 1.00511207166  
CGCATACC 0.753866841777  
CGCATACG 0.0579696598768  
CGCATAGA 0.205692762665  
CGCATAGC 0.657145473312  
CGCATATA 1.59395309688  
CGCATATC 4.2617465639  
CGCATCAA 0.284188147972  
CGCATCAC 0.346443359982  
CGCATCAG 0.192818619313  
CGCATCCA 0.304715122471  
CGCATCCC 0.16299462389  
CGCATCCG -0.0899093682269  
CGCATCGA -0.211189702531  
CGCATCGC -0.0700493960131  
CGCATCTA 1.42200348851  
CGCATCTC 0.0808430085179  
CGCATGAA 0.0675999737648  
CGCATGAC -0.954675124227

CGCATGAG -0.806628304662  
CGCATGCA 1.02712002439  
CGCATGCC -0.094083545135  
CGCATGCG 0.759279677735  
CGCATGGA -0.0424991206144  
CGCATGGC -0.797728279168  
CGCATGTA -0.662447766756  
CGCATGTC -0.322825358666  
CGCATTAA 0.465292383524  
CGCATTAC -0.604013869958  
CGCATTAG -0.275558545689  
CGCATTCA -0.248397146779  
CGCATTCC -0.0662359915643  
CGCATTGA -0.79115464273  
CGCATTGC -0.792193450907  
CGCATTTA 0.430036607946  
CGCATTTC 1.53351965047  
CGCCAAAA 0.949680101498  
CGCCAAAC -0.701323133072  
CGCCAAAG -0.101114964977  
CGCCAACA -0.964920395902  
CGCCAACC -0.54760637773  
CGCCAACG -0.905923169459  
CGCCAAGA -1.01171964111  
CGCCAAGC 0.071649868412  
CGCCAATA 0.254759482556  
CGCCAATC 0.415781203621  
CGCCACAA 0.521260203834  
CGCCACAC -1.12815650626  
CGCCACAG -0.742899608827  
CGCCACCA -1.07903961548  
CGCCACCC -0.673203490866  
CGCCACCG -0.807631930759  
CGCCACGA -0.802906498529  
CGCCACGC -0.388610853056  
CGCCACTA 0.204042743904  
CGCCACTC -0.677366217985  
CGCCAGAA 0.541773438585  
CGCCAGAC -0.775374750972  
CGCCAGAG -0.560807776884  
CGCCAGCA -0.307513451033  
CGCCAGCC -1.1797105368  
CGCCAGCG -0.214592163625  
CGCCAGGA 0.595885560279  
CGCCAGGC 0.207204343061  
CGCCAGTA -0.0419520288526  
CGCCAGTC 0.212440227726  
CGCCATAA -0.297578780921  
CGCCATAC -1.04218170208  
CGCCATAG -0.865348029842  
CGCCATCA -0.530705239309  
CGCCATCC -1.16421043626  
CGCCATGA -0.535888871298  
CGCCATGC -0.509388229333

CGCCATTA -0.203876617867  
CGCCATTC 0.257466629158  
CGCCCAAA 0.664143584675  
CGCCCAAC -0.860149825394  
CGCCCAAG -0.768165130769  
CGCCCACA -0.590240814038  
CGCCCACC -0.621195632311  
CGCCCACG -0.996144596495  
CGCCCAGA -0.514138018388  
CGCCCAGC -0.268389520195  
CGCCCATA -0.163168244335  
CGCCCATC 0.340790494801  
CGCCCCAA 0.109549088126  
CGCCCCAC -1.73684751116  
CGCCCCAG -0.996694186393  
CGCCCCCA -1.13349127547  
CGCCCCCC -1.20263697083  
CGCCCCCG -1.24274891441  
CGCCCCGA -0.430932189666  
CGCCCCGC -0.567943702078  
CGCCCCTA -0.436094171144  
CGCCCCTC -1.39917697991  
CGCCCGAA -0.0346812043205  
CGCCCGAC -1.44439719506  
CGCCCGAG -0.707839312384  
CGCCCGCA -1.01841631074  
CGCCCGCC -1.07469431626  
CGCCCGCG -0.779532689997  
CGCCCGGA -0.814427276758  
CGCCCGGC -0.936191416715  
CGCCCGTA 0.566463140202  
CGCCCGTC -0.803014126551  
CGCCCTAA -0.133054256971  
CGCCCTAC 0.0842084139289  
CGCCCTAG -1.21813124238  
CGCCCTCA -0.151379957387  
CGCCCTCC -1.3531742237  
CGCCCTGA -0.887451536271  
CGCCCTGC -0.00791575994984  
CGCCCTTA -0.778533019281  
CGCCCTTC -0.821511157454  
CGCCGAAA 1.24500264935  
CGCCGAAC -0.300081288557  
CGCCGAAG -0.339849322101  
CGCCGACA -0.95389945303  
CGCCGACC -1.41231655021  
CGCCGACG -0.63251114704  
CGCCGAGA -0.976866898123  
CGCCGAGC 0.0855436675665  
CGCCGATA 1.51980759071  
CGCCGATC 1.78753323129  
CGCCGCAA 0.687617943177  
CGCCGCAC -0.642864671271  
CGCCGCAG -0.565243217172

CGCCGCCA -1.28553906786  
CGCCGCCC -0.59502099708  
CGCCGCCG -0.458328829707  
CGCCGCGA -0.230973065244  
CGCCGCGC -0.248655703844  
CGCCGCTA 0.584651026788  
CGCCGCTC -0.983110364267  
CGCCGGAA 0.263055375518  
CGCCGGAC -0.891571795079  
CGCCGGAG -0.693112384908  
CGCCGGCA -0.969711820555  
CGCCGGCC -1.22909285452  
CGCCGGCG -0.741937826507  
CGCCGGGA -0.596860665991  
CGCCGGGC -0.769346957227  
CGCCGGTA -0.428101385337  
CGCCGGTC -0.830900817584  
CGCCGTAA -0.926568805413  
CGCCGTAC -0.794929742428  
CGCCGTAG -1.04521714537  
CGCCGTCA -0.630363374701  
CGCCGTCC -0.624387833633  
CGCCGTGA -1.00422877244  
CGCCGTGC -0.985948454826  
CGCCGTTA 0.0506980026327  
CGCCGTTC 1.2591593773  
CGCCTAAA 1.63672180799  
CGCCTAAC -0.738592406183  
CGCCTAAG -0.314564855962  
CGCCTACA 0.72928601725  
CGCCTACC -0.748073872807  
CGCCTACG -1.50916011915  
CGCCTAGA -0.556870090175  
CGCCTAGC 0.115047693416  
CGCCTATA 0.891064673491  
CGCCTATC 0.368687386555  
CGCCTCAA 0.0937862669631  
CGCCTCAC -1.28975758668  
CGCCTCAG 0.166623998995  
CGCCTCCA -1.03637749149  
CGCCTCCC -0.512400773048  
CGCCTCCG -1.04665586347  
CGCCTCGA 0.079390550671  
CGCCTCGC -0.884245387023  
CGCCTCTA -0.633858891357  
CGCCTCTC 0.0672889558455  
CGCCTGAA 0.370154416861  
CGCCTGAC -0.630898808496  
CGCCTGAG -0.531913088016  
CGCCTGCA -0.134560008384  
CGCCTGCC -0.991436026683  
CGCCTGGA -0.852090838986  
CGCCTGGC -0.601835495455  
CGCCTGTA -0.731333447796

CGCCTGTC 0.622627896892  
CGCCTTAA 0.311686587051  
CGCCTTAC -0.974647720734  
CGCCTTAG -1.1818889113  
CGCCTTCA -0.427594680106  
CGCCTTCC -0.0649790128515  
CGCCTTGA -0.82529583334  
CGCCTTGC 0.014571626695  
CGCCTTTA 0.443463880222  
CGCCTTTC 0.0729503563251  
CGCGAAAA 2.16644257358  
CGCGAAAC 0.83330069347  
CGCGAAAG -0.105688635451  
CGCGAACA 0.464812325075  
CGCGAACC -1.01736147286  
CGCGAACG -0.35191531849  
CGCGAAGA -0.210026195736  
CGCGAAGC 0.305275745802  
CGCGAATA 2.24902595011  
CGCGAATC 9.35306202259  
CGCGACAA 0.124104685115  
CGCGACAC -0.248820164458  
CGCGACAG 0.277744830956  
CGCGACCA -0.507289795178  
CGCGACCC -0.0362725168878  
CGCGACCG -0.499695878403  
CGCGACGA 0.0349052038394  
CGCGACGC 0.160006437  
CGCGACTA 0.740909843584  
CGCGACTC -0.0346812043205  
CGCGAGAA 1.21986307509  
CGCGAGAC -0.297225711048  
CGCGAGAG 0.0694342300482  
CGCGAGCA -0.562343505928  
CGCGAGCC -0.811274212899  
CGCGAGCG 1.15168249291  
CGCGAGGA -0.706924994646  
CGCGAGGC -0.562709482837  
CGCGAGTA -0.0773674769493  
CGCGAGTC -0.688850148709  
CGCGATAA 0.833598387998  
CGCGATAC 0.7651436354  
CGCGATAG 0.615062292324  
CGCGATCA 4.78654745901  
CGCGATCC 12.4983579287  
CGCGATGA 0.33072196624  
CGCGATGC 1.87075342429  
CGCGATTA 1.99966389834  
CGCGATTC 4.8770266104  
CGCGCAAA 2.10970407835  
CGCGCAAC -0.153492964001  
CGCGCAAG 0.498203242204  
CGCGCACA 0.965744988926  
CGCGCACC -0.812915488184

CGCGCACG -0.747382721875  
CGCGCAGA -0.702583234454  
CGCGCAGC -0.339501664855  
CGCGCATA 0.787682858365  
CGCGCATC 0.530852212971  
CGCGCCAA -0.311471747364  
CGCGCCAC -1.18383579188  
CGCGCCAG -0.596976412954  
CGCGCCCA -0.779207307796  
CGCGCCCC -0.38803003646  
CGCGCCCG -0.701152427119  
CGCGCCGA -0.370088840794  
CGCGCCGC -0.173321084982  
CGCGCCTA 0.458675654241  
CGCGCCTC -0.786601790055  
CGCGCGAA 1.42163001719  
CGCGCGAC 0.947685339983  
CGCGCGAG 0.213232553162  
CGCGCGCA 0.404951159967  
CGCGCGCC -0.52680689824  
CGCGCGCG 3.95547968268  
CGCGCGGA 0.0432489777399  
CGCGCGGC -0.076491255783  
CGCGCGTA 1.92430950257  
CGCGCGTC 0.423374495862  
CGCGCTAA -0.269608818691  
CGCGCTAC -0.723439338357  
CGCGCTAG -1.06975799972  
CGCGCTCA -0.632739518297  
CGCGCTCC -0.530312823795  
CGCGCTGA 0.729291638055  
CGCGCTGC 0.579455320475  
CGCGCTTA 0.954128448821  
CGCGCTTC -0.752637342559  
CGCGGAAA 1.51910457363  
CGCGGAAC -0.482174369568  
CGCGGAAG -0.668248854668  
CGCGGACA -0.213009386355  
CGCGGACC -0.460564453158  
CGCGGACG 0.046365402273  
CGCGGAGA -1.27638339979  
CGCGGAGC -0.0523898651698  
CGCGGATA 2.44776931506  
CGCGGATC 1.8200285667  
CGCGGCAA 0.117556862748  
CGCGGCAC -1.22104427701  
CGCGGCAG -0.922928396875  
CGCGGCCA -1.06841004723  
CGCGGCCC -1.01986044147  
CGCGGCCG 1.5859136792  
CGCGGCGA -0.352278797263  
CGCGGCGC 1.11594790795  
CGCGGCTA -0.446039041977  
CGCGGCTC -1.10341205383

CGCGGGAA -0.109304478986  
CGCGGGAC -1.09039218589  
CGCGGGAG -0.212404837468  
CGCGGGCA -0.0211458876674  
CGCGGGCC -0.517353119289  
CGCGGGGA 0.585092572308  
CGCGGGGC -0.702583234454  
CGCGGGTA -0.536164498959  
CGCGGGTC -0.877996924607  
CGCGGTAA 0.139422421732  
CGCGGTAC -0.0558304228358  
CGCGGTAG -0.726822647076  
CGCGGTCA -0.820495248856  
CGCGGTCC -1.26970796431  
CGCGGTGA 0.146931818242  
CGCGGTGC -0.227001861877  
CGCGGTTA -0.348807637432  
CGCGGTTC 0.490322872513  
CGCGTAAA 0.699742229404  
CGCGTAAC 0.467212825495  
CGCGTAAG -0.24050511912  
CGCGTACA 0.658189277761  
CGCGTACC -0.0947097445335  
CGCGTACG 1.42089910426  
CGCGTAGA -0.516731291628  
CGCGTAGC 0.45335129393  
CGCGTATA 2.14234326475  
CGCGTATC 4.42040067667  
CGCGTCAA -0.0742995578882  
CGCGTCAC -0.384911738325  
CGCGTCAG -0.120466358357  
CGCGTCCA 0.20188310542  
CGCGTCCC -0.822790203034  
CGCGTCCG 0.372235572243  
CGCGTCGA -0.329997923186  
CGCGTCGC 0.636232536817  
CGCGTCTA 0.233750784185  
CGCGTCTC -1.13591072009  
CGCGTGAA 0.225513805594  
CGCGTGAC -1.09848239899  
CGCGTGAG -0.785677687951  
CGCGTGCA 0.0680296531393  
CGCGTGCC -1.09329959972  
CGCGTGGA 0.164474144876  
CGCGTGGC -0.79965392559  
CGCGTGTA -0.102880106167  
CGCGTGTC -1.02106225301  
CGCGTTAA 0.215810213053  
CGCGTTAC -0.564393642788  
CGCGTTAG -0.554466258906  
CGCGTTCA -0.26959237263  
CGCGTTCC -1.04919959035  
CGCGTTGA -0.0811948293235  
CGCGTTGC 1.13262754499

CGCGTTTA 0.598897063104  
CGCGTTTC 1.77774074674  
CGCTAAAA 0.444173558995  
CGCTAAAC -0.00216026301808  
CGCTAAAG 1.29382038836  
CGCTAACA 0.263055375518  
CGCTAACC -0.862721656301  
CGCTAACG -1.06094124543  
CGCTAAGA 0.49290303054  
CGCTAAGC 0.78240242361  
CGCTAATA 0.263900369986  
CGCTAATC -0.274945253326  
CGCTACAA -0.425670282752  
CGCTACAC -0.510634799146  
CGCTACAG 0.188771639157  
CGCTACCA -0.24084195111  
CGCTACCC -0.215237099042  
CGCTACCG -0.0499608443647  
CGCTACGA -1.00931914069  
CGCTACGC -0.337742977183  
CGCTACTA 0.308657597274  
CGCTACTC -1.08762820669  
CGCTAGAA 0.661834682571  
CGCTAGAC -1.18092671262  
CGCTAGAG 0.312911506353  
CGCTAGCA -0.399528123288  
CGCTAGCC -0.718100197409  
CGCTAGCG -0.141066195153  
CGCTAGGA -0.76652010828  
CGCTAGGC -1.41906588887  
CGCTAGTA -0.630393352332  
CGCTAGTC 0.496370443167  
CGCTATAA 1.97045423617  
CGCTATAC -0.741235433963  
CGCTATAG 0.016217481896  
CGCTATCA 0.0554282229562  
CGCTATCC 1.33138506604  
CGCTATGA 0.873970762251  
CGCTATGC 0.487277644853  
CGCTATTA -0.104561351627  
CGCTATTC 1.42098633084  
CGCTCAAA 0.283355644184  
CGCTCAAC 0.743909063908  
CGCTCAAG -0.0124350959679  
CGCTCACA -1.37949895527  
CGCTCACC -0.793061136776  
CGCTCACG -1.31534287001  
CGCTCAGA -0.364677462082  
CGCTCAGC -0.858013502845  
CGCTCATA -0.288607558554  
CGCTCATC -0.894915549979  
CGCTCCAA -0.108297522041  
CGCTCCAC -0.994196883206  
CGCTCCAG -0.767736492285



CGCTCCCA 0.0366511926544  
CGCTCCCC -0.78371977394  
CGCTCCCG -0.668922726826  
CGCTCCGA -0.911695528808  
CGCTCCGC -0.670491347992  
CGCTCCTA -0.275977399808  
CGCTCCTC -1.27510456239  
CGCTCGAA -0.177362236154  
CGCTCGAC -1.28096102565  
CGCTCGAG -0.0587894648074  
CGCTCGCA -0.510117685015  
CGCTCGCC -1.46787613347  
CGCTCGGA -0.193317830136  
CGCTCGGC -0.611431668152  
CGCTCGTA -0.509095322899  
CGCTCGTC -0.996192477433  
CGCTCTAA -0.453917538066  
CGCTCTAC -0.348887994137  
CGCTCTAG -0.424656455933  
CGCTCTCA -1.62351728617  
CGCTCTCC -1.57306118636  
CGCTCTGA -0.291745217243  
CGCTCTGC -0.317913190778  
CGCTCTTA 0.201750287861  
CGCTCTTC 0.629634751731  
CGCTGAAA 1.25889311765  
CGCTGAAC -0.902064382208  
CGCTGAAG 0.293377332696  
CGCTGACA 0.310126917538  
CGCTGACC -0.564205033528  
CGCTGACG -0.332126543149  
CGCTGAGA 0.160909721305  
CGCTGAGC -0.0761381859093  
CGCTGATA 2.43720469835  
CGCTGATC 0.507704693915  
CGCTGCAA 0.824135241037  
CGCTGCAC -0.757327800886  
CGCTGCAG 0.197248230616  
CGCTGCCA -1.40786029212  
CGCTGCCC -1.49955291302  
CGCTGCCG -1.12565087596  
CGCTGCGA -0.313336189456  
CGCTGCGC 0.427353193636  
CGCTGCTA 0.784249795107  
CGCTGCTC -0.966702607687  
CGCTGGAA 0.0724936138117  
CGCTGGAC 0.157833475124  
CGCTGGAG -0.634146385164  
CGCTGGCA -0.375716308261  
CGCTGGCC -0.725015453931  
CGCTGGGA -0.711525103724  
CGCTGGGC -1.05756522294  
CGCTGGTA -0.633506862374  
CGCTGGTC -0.322087784042

CGCTGTAA -0.465651906915  
CGCTGTAC -0.882065138918  
CGCTGTAG -1.03149842391  
CGCTGTCA -0.612976765205  
CGCTGTCC -0.922274926159  
CGCTGTGA 0.967776597945  
CGCTGTGC -0.164483512886  
CGCTGTTA 0.093174223668  
CGCTGTTC -0.0515806773168  
CGCTTAAA 0.556135013686  
CGCTTAAC -0.754706839973  
CGCTTAAG 0.0573230590351  
CGCTTACA -0.0957239877082  
CGCTTACC 0.319320474  
CGCTTACG -0.137672269357  
CGCTTAGA -0.382584100202  
CGCTTAGC -0.279768945568  
CGCTTATA 0.793010757702  
CGCTTATC 0.960823453028  
CGCTTCAA 1.87165837402  
CGCTTCAC -1.27332276696  
CGCTTCAG 0.485435894162  
CGCTTCCA -0.638163387688  
CGCTTCCC -0.849713029966  
CGCTTCCG -0.246151114428  
CGCTTCGA -0.0946348004566  
CGCTTCGC -0.557262505689  
CGCTTCTA -0.910826177515  
CGCTTCTC 0.102729177123  
CGCTTGAA -0.392167365864  
CGCTTGAC -0.304742601966  
CGCTTGAG -0.789456326675  
CGCTTGCA -0.481125152491  
CGCTTGCC -1.22143377804  
CGCTTGGA 0.0423182139397  
CGCTTGGC 0.0315806013147  
CGCTTGTA -1.16278878875  
CGCTTGTC -0.490655540943  
CGCTTTAA -0.447642012512  
CGCTTTAC -0.201888518048  
CGCTTTAG 0.42713814577  
CGCTTTCA -0.174436086305  
CGCTTTCC -0.906934498142  
CGCTTTGA 0.567676401537  
CGCTTTGC 1.15585292261  
CGCTTTTA -0.0415081933747  
CGCTTTTC 1.41764257594  
CGGAAAA 0.33859109432  
CGGAAAAC 0.82289845559  
CGGAAAAG 0.155689658168  
CGGAAACA 0.376883354082  
CGGAAACC -0.766978932574  
CGGAAACG -0.536164498959  
CGGAAAGA 0.100508750665

CGGAAAGC -0.92967128202  
CGGAAATA 2.13081520029  
CGGAAATC 14.3117347922  
CGGAACAA -0.470245354298  
CGGAACAC -0.299021038046  
CGGAACAG 1.32007850297  
CGGAACCA 0.498677055313  
CGGAACCC -1.20217044395  
CGGAACCG -0.908682776914  
CGGAACGA -0.359221325102  
CGGAACGC -1.2555195933  
CGGAACTA -0.340103715606  
CGGAACTC -0.141596424497  
CGGAAGAA -0.0160617647583  
CGGAAGAC -0.885079348057  
CGGAAGAG -0.805925079406  
CGGAAGCA -0.0248066976484  
CGGAAGCC -0.691644521889  
CGGAAGGA -0.558920018857  
CGGAAGGC -0.64121985696  
CGGAAGTA 1.72739394038  
CGGAAGTC -0.609613441574  
CGGAATAA 1.16256832826  
CGGAATAC 1.30551374614  
CGGAATAG 0.258434240462  
CGGAATCA 3.23656301119  
CGGAATCC 9.55101805838  
CGGAATGA -1.11411760705  
CGGAATGC 0.0534342941533  
CGGAATTA 1.19750496698  
CGGAATTC 1.19617241965  
CGGACAAA 0.490702172813  
CGGACAAC 0.242743032529  
CGGACAAG -0.328613955898  
CGGACACA -0.110331837374  
CGGACACC -0.788903405929  
CGGACACG -0.261607081231  
CGGACAGA -0.00746338917426  
CGGACAGC -0.962311092956  
CGGACATA -0.500824619473  
CGGACATC -0.0953634234269  
CGGACCAA -0.26467416758  
CGGACCAC -1.16715740391  
CGGACCAG -1.11453250578  
CGGACCCA -0.00344701118371  
CGGACCCC -0.621151498576  
CGGACCCG 0.272700261866  
CGGACCGA -0.976890214059  
CGGACCGC -1.47571590846  
CGGACCTA -0.302214072081  
CGGACCTC -0.785362298293  
CGGACGAA -0.630723522627  
CGGACGAC -0.460172454  
CGGACGAG -1.1100412738

CGGACGCA -0.336269077003  
CGGACGCC -1.11246113477  
CGGACGGA -0.514879964749  
CGGACGGC -0.414338530139  
CGGACGTA -0.482167291517  
CGGACGTC -1.02920138795  
CGGACTAA -0.0580316969182  
CGGACTAC -0.730666861867  
CGGACTAG -1.03085182306  
CGGACTCA -0.317779540507  
CGGACTCC -0.748267270161  
CGGACTGA -1.11040017265  
CGGACTGC -1.01455669078  
CGGACTTA 0.496945430779  
CGGACTTC -0.863612658105  
CGGAGAAA 0.644686436875  
CGGAGAAC 0.155076782161  
CGGAGAAG -0.638850791416  
CGGAGACA -0.619805003327  
CGGAGACC -0.639182002601  
CGGAGACG -0.269671272089  
CGGAGAGA -1.0194278476  
CGGAGAGC -1.58488715353  
CGGAGATA 1.52741483087  
CGGAGATC 3.85715471915  
CGGAGCAA 0.383514655824  
CGGAGCAC -0.505304609851  
CGGAGCAG -0.0802438722582  
CGGAGCCA -0.887096800973  
CGGAGCCC -1.32492259665  
CGGAGCCG -0.3699431162  
CGGAGCGA -0.821749521254  
CGGAGCGC -0.716513672935  
CGGAGCTA -0.798492500575  
CGGAGCTC -1.05427038987  
CGGAGGAA -0.0785642922226  
CGGAGGAC -1.50341836197  
CGGAGGAG -0.244321438061  
CGGAGGCA -1.08434961151  
CGGAGGCC -1.37895269622  
CGGAGGGA -0.731449611115  
CGGAGGGC -1.3435601477  
CGGAGGTA -0.114757701474  
CGGAGGTC -1.35914247854  
CGGAGTAA -0.318325799557  
CGGAGTAC -1.09348779262  
CGGAGTAG 0.137839644462  
CGGAGTCA 0.477842185565  
CGGAGTCC -0.691418232413  
CGGAGTGA -0.569962404062  
CGGAGTGC -0.824444593533  
CGGAGTTA 0.560715137678  
CGGAGTTC -0.603868978076  
CGGATAAA 0.0910412319668

CGGATAAC 0.678276372164  
CGGATAAG -0.365317401228  
CGGATACA 1.79785115708  
CGGATACC 4.38825612117  
CGGATACG 6.43423816538  
CGGATAGA 0.350930220234  
CGGATAGC 0.905698337228  
CGGATATA 1.94156662535  
CGGATATC 13.4082622941  
CGGATCAA 0.222546852859  
CGGATCAC 2.05180686441  
CGGATCAG 1.23547017911  
CGGATCCA 1.52602149558  
CGGATCCC 1.91461340444  
CGGATCCG 3.95654451311  
CGGATCGA 0.455962262299  
CGGATCGC 5.68718582198  
CGGATCTA 2.99592111913  
CGGATCTC 3.90283084409  
CGGATGAA 0.511089043524  
CGGATGAC -0.291769574068  
CGGATGAG 0.170469671032  
CGGATGCA -0.174752516852  
CGGATGCC -0.477204328199  
CGGATGGA -0.82170434663  
CGGATGGC -0.867599891176  
CGGATGTA -0.493324382795  
CGGATGTC 0.902185125443  
CGGATTAA -0.277773559519  
CGGATTAC 9.95281282364  
CGGATTAG 0.0215131136445  
CGGATTCA 3.11942000629  
CGGATTCC 12.3296300829  
CGGATTGA 0.277163181648  
CGGATTGC 8.49422517579  
CGGATTTA 3.65001886664  
CGGATTTTC 18.0931210496  
CGGCAAAA 0.224586164464  
CGGCAAAC 0.00316347275925  
CGGCAAAG 1.11632242016  
CGGCAACA -1.03503474345  
CGGCAACC -0.43364225076  
CGGCAACG -0.28192254689  
CGGCAAGA -0.0777299148325  
CGGCAAGC -0.899972609749  
CGGCAATA 0.629575421004  
CGGCAATC 4.97976869456  
CGGCACAA 1.36778332244  
CGGCACAC -0.920970066508  
CGGCACAG -0.114154609832  
CGGCACCA -1.02225219841  
CGGCACCC -1.0595822595  
CGGCACCG -0.83812667567  
CGGCACGA -1.24413600437

CGGCACGC -0.969242171006  
CGGCACTA -0.597684218125  
CGGCACTC -1.12984441342  
CGGCAGAA 0.528248322653  
CGGCAGAC -1.27450396888  
CGGCAGAG 0.0607994233156  
CGGCAGCA -1.024683301  
CGGCAGCC -0.918364302588  
CGGCAGGA -0.364291916442  
CGGCAGGC -1.6471550644  
CGGCAGTA -0.0905330694895  
CGGCAGTC -0.916798179558  
CGGCATAA 1.02287215247  
CGGCATAC -0.548168041951  
CGGCATAG 0.32277831044  
CGGCATCA 0.412079590753  
CGGCATCC 0.617795669353  
CGGCATGA -0.914710362481  
CGGCATGC 0.836756656308  
CGGCATTA -0.534825498118  
CGGCATTC -0.611057364123  
CGGCCAAA -0.577567978804  
CGGCCAAC 0.142313597678  
CGGCCAAG -0.106630640862  
CGGCCACA -0.906732357312  
CGGCCACC -1.50539272204  
CGGCCACG -1.44239493913  
CGGCCAGA -0.945118088992  
CGGCCAGC -0.564041405627  
CGGCCATA -0.136675513134  
CGGCCATC -0.550987812846  
CGGCCCAA -0.743256217727  
CGGCCCAC -1.68523165176  
CGGCCCAG -1.03344343088  
CGGCCCCA -0.157780597915  
CGGCCCCC -0.941728118578  
CGGCCCCG -0.595019748012  
CGGCCCGA -1.39350558689  
CGGCCCGC -0.259167859704  
CGGCCCTA -0.661273851061  
CGGCCCTC -2.02450848438  
CGGCCGAA 0.746101178159  
CGGCCGAC -1.15339704685  
CGGCCGAG -0.419388928214  
CGGCCGCA -0.948036744433  
CGGCCGCC -1.23053136444  
CGGCCGGA -0.18178018949  
CGGCCGGC 0.262730617851  
CGGCCGTA 0.214015510588  
CGGCCGTC -1.39416509477  
CGGCCTAA -0.435276239815  
CGGCCTAC -1.00751944195  
CGGCCTAG -1.22527278838  
CGGCCTCA -0.937688841008

CGGCCTCC -0.735961244548  
CGGCCTGA -0.99075112109  
CGGCCTGC -1.29434083334  
CGGCCTTA -0.609185843979  
CGGCCTTC -1.36076668323  
CGGCGAAA -0.314592751813  
CGGCGAAC -0.947202783399  
CGGCGAAG -0.83442839365  
CGGCGACA -0.6061322892  
CGGCGACC -1.39918176801  
CGGCGACG -0.616155018602  
CGGCGAGA -0.341835131962  
CGGCGAGC -0.501738729034  
CGGCGATA 1.00128659289  
CGGCGATC 1.63822464492  
CGGCGCAA 1.68735236096  
CGGCGCAC -0.563058180973  
CGGCGCAG 1.21729166054  
CGGCGCCA -0.0554748548263  
CGGCGCCC -0.830939746868  
CGGCGCCG -0.326451194744  
CGGCGCGA 0.176903828216  
CGGCGCGC -0.356793553365  
CGGCGCTA -0.11249439035  
CGGCGCTC -1.12011583952  
CGGCGGAA 0.166259895688  
CGGCGGAC -1.62959108725  
CGGCGGAG -0.891571795079  
CGGCGGCA -0.847032113792  
CGGCGGCC -1.47175844484  
CGGCGGGA -0.466790015995  
CGGCGGGC -0.650970914083  
CGGCGGTA 0.105431743809  
CGGCGGTC -1.4214813781  
CGGCGTAA -0.164942753535  
CGGCGTAC -1.51561405325  
CGGCGTAG -0.371266295514  
CGGCGTCA -0.428202143485  
CGGCGTCC -0.15849006851  
CGGCGTGA -1.3142788723  
CGGCGTGC -0.971754879364  
CGGCGTTA -0.213304166391  
CGGCGTTC -1.03226056353  
CGGCTAAA -0.642948150645  
CGGCTAAC -1.05794806226  
CGGCTAAG -0.129049953304  
CGGCTACA -0.798249765037  
CGGCTACC -1.25026996889  
CGGCTACG -0.235182424233  
CGGCTAGA -0.452712603852  
CGGCTAGC -0.927232685028  
CGGCTATA -0.469211958748  
CGGCTATC 0.225597076791  
CGGCTCAA -1.16992762844

CGGCTCAC -0.963690896684  
CGGCTCAG -0.309124748687  
CGGCTCCA -0.507634954288  
CGGCTCCC -0.978031029452  
CGGCTCGA -0.802700610496  
CGGCTCGC -0.98687359782  
CGGCTCTA -0.844022692746  
CGGCTCTC -1.52335161283  
CGGCTGAA -0.0172038292198  
CGGCTGAC -0.739442813278  
CGGCTGAG -0.570913569305  
CGGCTGCA -0.855189984746  
CGGCTGCC -0.967578828854  
CGGCTGGA -1.21202975362  
CGGCTGGC -0.780055008577  
CGGCTGTA 0.211607099404  
CGGCTGTC -0.729255206907  
CGGCTTAA -0.662704450219  
CGGCTTAC -1.23966267569  
CGGCTTAG -0.718474085082  
CGGCTTCA -0.433467381247  
CGGCTTCC -0.508060053747  
CGGCTTGA -1.13933982797  
CGGCTTGC -1.3249155186  
CGGCTTTA -0.743059905881  
CGGCTTTC -1.00123413203  
CGGGAAAA -0.273263591511  
CGGGAAAC 0.0298414823735  
CGGGAAAG -0.734919105522  
CGGGAAACA -0.931559456403  
CGGGAAACC -0.848840764182  
CGGGAACG -0.038134044488  
CGGGAAGA -1.38794640181  
CGGGAAGC -1.10111085432  
CGGGAATA 2.3671896517  
CGGGAATC 13.5568108226  
CGGGACAA 0.670246114318  
CGGGACAC -0.606297166169  
CGGGACAG -0.982574722295  
CGGGACCA -0.731702339197  
CGGGACCC -1.32784749743  
CGGGACCG -0.537207054341  
CGGGACGA -1.537037234  
CGGGACGC -1.39304426446  
CGGGACTA -1.29352061205  
CGGGACTC -1.17481002688  
CGGGAGAA 0.103415748139  
CGGGAGAC -0.754251346528  
CGGGAGAG -1.00113212482  
CGGGAGCA 0.144014828225  
CGGGAGCC -0.784145081577  
CGGGAGGA 0.164147513608  
CGGGAGGC -1.01645548224  
CGGGAGTA 0.756527356509



CGGGAGTC -1.01746139829  
CGGGATAA 1.0922195723  
CGGGATAC 1.7804293655  
CGGGATAG -0.162684855039  
CGGGATCA 0.0197821136449  
CGGGATCC 2.42475232361  
CGGGATGA -0.839396977774  
CGGGATGC 0.00346824533885  
CGGGATTA 2.42941217977  
CGGGATTC 4.70229740949  
CGGGCAAA 0.414472388588  
CGGGCAAC -0.755041590183  
CGGGCAAG -0.924504304271  
CGGGCACA -0.887636398327  
CGGGCACC -1.72619941507  
CGGGCACG 0.253096973115  
CGGGCAGA -0.9267193181  
CGGGCAGC -0.108629149581  
CGGGCATA 0.706598987911  
CGGGCATC -0.775374750972  
CGGGCCAA -0.670699109628  
CGGGCCAC -1.06863342221  
CGGGCCAG -1.12440742881  
CGGGCCCA -1.22909285452  
CGGGCCCC -1.47434026829  
CGGGCCCG -0.342860200392  
CGGGCCGA -0.413502903681  
CGGGCCGC -1.83796726423  
CGGGCCTA -1.33765247265  
CGGGCCTC -1.75949415396  
CGGGCGAA 0.422723939638  
CGGGCGAC -1.01328555596  
CGGGCGAG -1.24353770082  
CGGGCGCA 0.132456994313  
CGGGCGCC -0.906051198924  
CGGGCGGA -0.598480498943  
CGGGCGGC -0.967540940459  
CGGGCGTA -0.353643195819  
CGGGCGTC -1.18812009494  
CGGGCTAA 0.362103549395  
CGGGCTAC -0.795177890594  
CGGGCTAG -0.465457676849  
CGGGCTCA -0.945912288029  
CGGGCTCC -1.20996088075  
CGGGCTGA -0.570775339119  
CGGGCTGC -0.648579365316  
CGGGCTTA -0.750878030353  
CGGGCTTC -1.22907203672  
CGGGGAAA 1.42991217041  
CGGGGAAC -0.13203647477  
CGGGGAAG -1.16010641533  
CGGGGACA -0.741885157475  
CGGGGACC -1.50822997989  
CGGGGACG 0.571458162931

CGGGGAGA -0.855034475786  
CGGGGAGC -0.612050164965  
CGGGGATA 2.26893401144  
CGGGGATC 3.33907589138  
CGGGGCAA 1.25737300196  
CGGGGCAC -0.952390578948  
CGGGGCAG -1.38231477078  
CGGGGCCA -1.4522117805  
CGGGGCCC -0.79227922024  
CGGGGCGA -1.09580065011  
CGGGGCGC -0.051108321454  
CGGGGCTA 0.00221168298199  
CGGGGCTC -1.34256609779  
CGGGGGAA 0.89325699592  
CGGGGGAC -0.728167893257  
CGGGGGAG -0.260535589109  
CGGGGGCA -1.19591344623  
CGGGGGCC -1.53831128331  
CGGGGGGA -0.25647757552  
CGGGGGGC -1.39505151666  
CGGGGGTA -0.137216151378  
CGGGGGTC -1.58642912791  
CGGGGTAA 0.824878644645  
CGGGGTAC -0.278537989104  
CGGGGTAG -0.635010323828  
CGGGGTCA -1.20592909758  
CGGGGTCC -0.990544816701  
CGGGGTGA -0.327372174179  
CGGGGTGC -0.272372173351  
CGGGGTTA -0.316461357465  
CGGGGTTC -0.816915420113  
CGGGTAAA 0.267481655974  
CGGGTAAC -0.0995074145263  
CGGGTAAG -0.815221683974  
CGGGTACA -0.0896331160321  
CGGGTACC -0.521675727105  
CGGGTACG 0.215761499403  
CGGGTAGA -0.164942753535  
CGGGTAGC -0.382093216498  
CGGGTATA -0.329284289031  
CGGGTATC 2.3161073525  
CGGGTCAA -0.429161011314  
CGGGTCAC -0.972635472268  
CGGGTCAG -0.558664792639  
CGGGTCCA -1.01619588428  
CGGGTCCC -1.505315488  
CGGGTCGA -1.16636237216  
CGGGTCGC -0.874337988228  
CGGGTCTA -1.06491203244  
CGGGTCTC -1.457649806  
CGGGTGAA 0.237491534515  
CGGGTGAC -0.0832890999183  
CGGGTGAG -0.748111761201  
CGGGTGCA -1.31853236502

CGGGTGCC -1.38493885436  
CGGGTGGA -0.327781243932  
CGGGTGGC -0.821993714039  
CGGGTGTA 0.0159872370374  
CGGGTGTC -0.946855750687  
CGGGTTAA -0.0390841688414  
CGGGTTAC -0.118602748977  
CGGGTTAG -1.1395646602  
CGGGTTCA -0.634080184562  
CGGGTTCC -1.02809408921  
CGGGTTGA 0.0489166235592  
CGGGTTGC 0.00707263908416  
CGGGTTTA 0.256475701918  
CGGGTTTC -1.04944024411  
CGGTAAAA 1.72563067279  
CGGTAAAC 0.585420452645  
CGGTAAAG 0.32748396576  
CGGTAAACA -0.517721594334  
CGGTAAACC -0.57397794934  
CGGTAAACG -0.582651893535  
CGGTAAAGA 0.507186122539  
CGGTAAAGC -0.54724144171  
CGGTAAATA 0.154385631229  
CGGTAAATC 5.88656787701  
CGGTACAA 1.49639547742  
CGGTACAC -0.730742846834  
CGGTACAG -0.641543365558  
CGGTACCA -0.147539489799  
CGGTACCC -0.827903887218  
CGGTACCG 0.576067223663  
CGGTACGA -0.625318805611  
CGGTACGC -0.932330131328  
CGGTACTA -0.0663783853105  
CGGTACTC -0.550633285726  
CGGTAGAA 1.42190731028  
CGGTAGAC -0.216346271381  
CGGTAGAG -0.643098246977  
CGGTAGCA -0.21725122111  
CGGTAGCC -1.35852960253  
CGGTAGGA 0.744121821816  
CGGTAGGC -1.21095139163  
CGGTAGTA 0.078996469733  
CGGTAGTC -0.78371977394  
CGGTATAA 1.66204811791  
CGGTATAC 0.510020257715  
CGGTATAG -0.36109555156  
CGGTATCA 1.47388310942  
CGGTATCC 4.0110113701  
CGGTATGA 0.0124007465993  
CGGTATGC -0.0782332892161  
CGGTATTA 0.617198198517  
CGGTATTC 0.485075954414  
CGGTCAAA 0.465433320024  
CGGTCAAC -0.422386066758

CGGTCAAG -0.468114860733  
CGGTCACA -0.896693390026  
CGGTCACC -1.27739056491  
CGGTCACG -0.247232182738  
CGGTCAGA -0.90465328371  
CGGTCAGC -0.653519220877  
CGGTCATA 0.118463061545  
CGGTCATC -1.16594830613  
CGGTCCAA -0.853570984505  
CGGTCCAC -0.814025493235  
CGGTCCAG -0.579097878864  
CGGTCCCA -0.113018998888  
CGGTCCCC -1.15437277709  
CGGTCCGA -1.37862502406  
CGGTCCGC -1.33752132052  
CGGTCCTA -1.32047945378  
CGGTCCTC -0.918637432113  
CGGT CGAA -0.176895501097  
CGGT CGAC -0.601770543921  
CGGT CGAG -0.985869763545  
CGGT CGCA -0.478545827176  
CGGT CGCC -0.841306178135  
CGGT CGGA 0.15923326394  
CGGT CGGC -0.827822281445  
CGGT CGTA -0.717770235292  
CGGT CGTC -1.57837992587  
CGGTCTAA 0.119271208508  
CGGTCTAC 0.0278590033602  
CGGTCTAG -0.704727675945  
CGGTCTCA -0.395677663157  
CGGTCTCC -0.804577543267  
CGGTCTGA -0.413025135191  
CGGTCTGC -0.787636434673  
CGGTCTTA -0.859425990517  
CGGTCTTC -1.1186186234  
CGGTGAAA 1.03072878987  
CGGTGAAC -0.556372752953  
CGGTGAAG 0.390656201823  
CGGTGACA 0.0834831218064  
CGGTGACC -1.05860403111  
CGGTGACG -0.354257945428  
CGGTGAGA -0.603741156789  
CGGTGAGC -0.497985279847  
CGGTGATA 1.45264145988  
CGGTGATC 0.84123310766  
CGGTGCAA 0.829950485053  
CGGTGCAC -0.240219707094  
CGGTGCAG -0.42021227217  
CGGTGCCA -1.2812603856  
CGGTGCCC -1.14842138467  
CGGTGCGA -0.57301304435  
CGGTGCGC -1.22699858393  
CGGTGCTA -0.604236620409  
CGGTGCTC -0.769642361797

CGGTGGAA 1.54145060742  
CGGTGGAC -1.58253286862  
CGGTGGAG -0.40843356141  
CGGTGGCA -0.843069237545  
CGGTGGCC -1.27043367279  
CGGTGGGA -0.221714140893  
CGGTGGGC -0.624386792743  
CGGTGGTA -0.203876617867  
CGGTGGTC -1.30642972931  
CGGTGTAA 1.60067266609  
CGGTGTAC -0.153048712167  
CGGTGTAG 0.0867798284802  
CGGTGTCA 0.0870787720761  
CGGTGTCC -0.217611369036  
CGGTGTGA -0.65634752707  
CGGTGTGC -0.0398392304166  
CGGTGTTA 0.615190738145  
CGGTGTTC -0.939147127839  
CGGTTAAA 1.38530295767  
CGGTTAAC 0.0432837434644  
CGGTTAAG 0.273429301192  
CGGTTACA 1.43817079951  
CGGTTACC -0.288947721392  
CGGTTACG 1.07111969197  
CGGTTAGA -0.0614928642054  
CGGTTAGC 0.202317572888  
CGGTTATA -0.223819236743  
CGGTTATC 0.657069696523  
CGGTTCAA 1.17862884395  
CGGTTCAC -0.0519256282487  
CGGTTCAG -0.303792477612  
CGGTTCCA -0.411842476021  
CGGTTCCC -0.907923135423  
CGGTTCGA -0.871097073256  
CGGTTCGC -1.32218214157  
CGGTTCTA -0.633226238441  
CGGTTCTC -0.200092774693  
CGGTTGAA 0.592558667796  
CGGTTGAC -0.950488456639  
CGGTTGAG -0.640060305547  
CGGTTGCA -0.0749145156751  
CGGTTGCC -1.00095517352  
CGGTTGGA -0.969329189406  
CGGTTGGC -0.448058993029  
CGGTTGTA -0.0517776136968  
CGGTTGTC -0.169614892199  
CGGTTTAA 0.659717720575  
CGGTTTAC -0.373960326903  
CGGTTTAG -0.127882074771  
CGGTTTCA -0.155592647224  
CGGTTTCC 0.146628919265  
CGGTTTGA -0.659410658037  
CGGTTTGC -0.0625408322147  
CGGTTTTA 0.484679167163

CGGTTTTTC 0.645903445413  
CGTAAAAA 2.46034222486  
CGTAAAAC 0.286008039974  
CGTAAAAG 0.728563431441  
CGTAAACA -0.193788312397  
CGTAAACC -0.611015520347  
CGTAAACG -0.264995594399  
CGTAAAGA 0.309991810022  
CGTAAAGC -0.27784600546  
CGTAAATA 0.464810243295  
CGTAAATC 2.26239597344  
CGTAACAA 2.24352172401  
CGTAACAC 1.05265326323  
CGTAACAG 0.872547657501  
CGTAACCA 0.54823653251  
CGTAACCC 1.22289414665  
CGTAACGA 0.0127471547772  
CGTAACGC 0.773955809782  
CGTAACTA 0.681563919006  
CGTAACTC 0.602584519868  
CGTAAGAA 1.69859605428  
CGTAAGAC -0.729241258981  
CGTAAGAG -0.692004461637  
CGTAAGCA 0.0935972413468  
CGTAAGCC -0.854967026117  
CGTAAGGA 0.514884961021  
CGTAAGGC -0.606383560035  
CGTAAGTA 0.838587998099  
CGTAAGTC 0.44940423921  
CGTAATAA 3.45352923663  
CGTAATAC 3.93286364204  
CGTAATAG 0.96717704533  
CGTAATCA 6.00918721215  
CGTAATCC 23.9993259401  
CGTAATGA 0.0785407681095  
CGTAATGC 0.35958542841  
CGTAATTA 1.08810847332  
CGTAATTC 2.0748538335  
CGTACAAA 1.82863860025  
CGTACAAC -0.0493506746715  
CGTACAAG 0.0848333642595  
CGTACACA 0.108695974716  
CGTACACC -0.216769497238  
CGTACACG 0.0576324115305  
CGTACAGA -0.637069204165  
CGTACAGC -0.459769837764  
CGTACATA 0.657128402716  
CGTACATC -0.673203490866  
CGTACCAA -0.0824064252342  
CGTACCAC -0.175571489071  
CGTACCAG -1.13335096351  
CGTACCCA -0.0492632399151  
CGTACCCC -0.268546278223  
CGTACCGA -1.25904508759

CGTACCGC -0.0947097445335  
CGTACCTA -0.487955888749  
CGTACCTC -0.240759512626  
CGTACGAA 0.443400385935  
CGTACGAC -0.938818831146  
CGTACGAG -0.239306846601  
CGTACGCA 0.339359271109  
CGTACGCC -0.843069237545  
CGTACGGA 0.757024277375  
CGTACGGC -0.378160734238  
CGTACGTA 0.666747058637  
CGTACGTC 0.670478024601  
CGTACTAA 2.83059948165  
CGTACTAC 0.740999984655  
CGTACTAG -0.0801724672071  
CGTACTCA -0.309447216396  
CGTACTCC -0.39678641914  
CGTACTGA -0.314578179353  
CGTACTGC -0.655547499049  
CGTACTTA -0.0306987593426  
CGTACTTC -0.553374157163  
CGTAGAAA 1.40415222573  
CGTAGAAC -0.524519438469  
CGTAGAAG 0.288971037327  
CGTAGACA 0.372235572243  
CGTAGACC -1.12290375918  
CGTAGACG -0.568304682715  
CGTAGAGA 0.434353803135  
CGTAGAGC -0.309718472319  
CGTAGATA 1.93907515115  
CGTAGATC 1.75636565511  
CGTAGCAA 1.83383264114  
CGTAGCAC -0.151890826178  
CGTAGCAG -0.153739446743  
CGTAGCCA -0.540543731189  
CGTAGCCC -0.908752308364  
CGTAGCGA -0.645772501456  
CGTAGCGC -0.112584323242  
CGTAGCTA -0.375482732555  
CGTAGCTC -0.497844343347  
CGTAGGAA 0.263119702518  
CGTAGGAC -1.04082708788  
CGTAGGAG -0.972741851221  
CGTAGGCA 0.340671625167  
CGTAGGCC -2.16772495001  
CGTAGGGA -0.687271743177  
CGTAGGGC -0.498982660604  
CGTAGGTA -0.187433887384  
CGTAGGTC -1.26346595542  
CGTAGTAA 0.697786188996  
CGTAGTAC 0.586840018369  
CGTAGTAG -0.167957170852  
CGTAGTCA 0.565678100996  
CGTAGTCC -0.190559055393

CGTAGTGA -1.04018007069  
CGTAGTGC -0.303613028184  
CGTAGTTA -0.123527823901  
CGTAGTTC -0.234290589717  
CGTATAAA 2.33048724726  
CGTATAAC -0.467219279013  
CGTATAAG 0.793010757702  
CGTATACA 1.22550511502  
CGTATACC 0.336851975379  
CGTATACG 3.22761614565  
CGTATAGA 0.736631161325  
CGTATAGC 0.744266089164  
CGTATATA 1.27923377285  
CGTATATC 1.64873451082  
CGTATCAA 2.6018181143  
CGTATCAC 2.3595921959  
CGTATCAG 3.19150954662  
CGTATCCA 5.78647131877  
CGTATCCC 2.32748677787  
CGTATCGA 0.71787932056  
CGTATCGC 1.98528358722  
CGTATCTA 6.32087837912  
CGTATCTC 5.37658800582  
CGTATGAA 1.7247802657  
CGTATGAC -0.602009948611  
CGTATGAG -0.801241699131  
CGTATGCA 0.133986686195  
CGTATGCC -1.32304982744  
CGTATGGA 0.492859729518  
CGTATGGC -0.18797119478  
CGTATGTA 1.05646541861  
CGTATGTC -0.479182019118  
CGTATTAA 2.25274692353  
CGTATTAC 2.62284908772  
CGTATTAG 0.656747436992  
CGTATTCA 0.898267631998  
CGTATTCC 1.77652998354  
CGTATTGA 1.02660561657  
CGTATTGC 0.453178922553  
CGTATTTA 0.821549878561  
CGTATTTT 1.99724008198  
CGTCAAAA 1.36433568672  
CGTCAAAC -0.379540954321  
CGTCAAAG 0.428120537712  
CGTCAACA 0.332015167924  
CGTCAACC -0.607342219686  
CGTCAACG -0.371705967432  
CGTCAAGA 0.308973611465  
CGTCAAGC 0.0364592525462  
CGTCAATA -0.48989194407  
CGTCAATC -0.293647131373  
CGTCACAA 0.254741162893  
CGTCACAC -0.29346705741  
CGTCACAG -0.0550457999857



CGTCACCA -0.680163505657  
CGTCACCC 0.568909231603  
CGTCACGA -1.0277329004  
CGTCACGC -0.689383084368  
CGTCACTA -0.244558969149  
CGTCACTC -0.596096028228  
CGTCAGAA 1.09947582437  
CGTCAGAC -1.08024205155  
CGTCAGAG -0.837487361058  
CGTCAGCA 0.487952974257  
CGTCAGCC -1.21734870131  
CGTCAGGA 0.954404076482  
CGTCAGGC 0.494466447256  
CGTCAGTA 0.203664068137  
CGTCAGTC -0.573955882473  
CGTCATAA 2.3106428884  
CGTCATAC -0.62758669665  
CGTCATAG -0.333101024327  
CGTCATCA -0.13203647477  
CGTCATCC 0.253748153873  
CGTCATGA 0.372878009525  
CGTCATGC -0.809002782833  
CGTCATTA 0.157145238685  
CGTCATTC -0.806837107187  
CGTCCAAA 0.605784215598  
CGTCCAAC -0.732486337513  
CGTCCAAG -1.10739907873  
CGTCCACA 0.354137410371  
CGTCCACC -0.421945978484  
CGTCCACG 0.169703367845  
CGTCCAGA -1.10850158937  
CGTCCAGC 0.166024030023  
CGTCCATA 1.113418129  
CGTCCATC -1.03874947153  
CGTCCCAA 0.389901348426  
CGTCCCAC -0.403881541447  
CGTCCCAG -1.03943187899  
CGTCCCCA -0.78062583263  
CGTCCCCC -0.237100576246  
CGTCCCCG -0.973182564029  
CGTCCCCG -1.35783970067  
CGTCCCTA -0.0912119379199  
CGTCCCTC -0.976996176656  
CGTCCGAA -0.518006173648  
CGTCCGAC -0.689234028926  
CGTCCGAG -1.31284910585  
CGTCCGCA 0.0606843008863  
CGTCCGCC -1.10495444457  
CGTCCGGA 0.0452583117141  
CGTCCGGC -0.710043500959  
CGTCCGTA -0.633646341628  
CGTCCGTC -0.969899597103  
CGTCCTAA 0.649076286182  
CGTCCTAC 0.040297430176

CGTCCTAG -1.22864652091  
CGTCCTCA -1.11273863603  
CGTCCTCC -1.6792048989  
CGTCCTGA 0.0479850270471  
CGTCCTGC -0.92967128202  
CGTCCTTA -0.438042717145  
CGTCCTTC -1.36328417968  
CGTCGAAA 1.03499352421  
CGTCGAAC 0.244212769149  
CGTCGAAG -1.21735328122  
CGTCGACA -0.378057477954  
CGTCGACC -0.551250325293  
CGTCGACG 0.300316737866  
CGTCGAGA -0.67173125611  
CGTCGAGC -0.352745115964  
CGTCGATA 0.394006826597  
CGTCGATC -0.539466618261  
CGTCGCAA 1.24933504153  
CGTCGCAC -0.406626160087  
CGTCGCAG -0.124406751381  
CGTCGCCA -0.414546291775  
CGTCGCCC -1.15725312778  
CGTCGCGA -0.248342604145  
CGTCGCGC 0.613029226059  
CGTCGCTA 0.147245542475  
CGTCGCTC -1.02262483702  
CGTCGGAA 0.559167334311  
CGTCGGAC -0.668486593934  
CGTCGGAG -0.777710091681  
CGTCGGCA -0.600143008383  
CGTCGGCC -1.79412497921  
CGTCGGGA -0.390847517397  
CGTCGGGC -0.819029675795  
CGTCGGTA 0.0233255112387  
CGTCGGTC -1.50773722258  
CGTCGTAA 2.21567791765  
CGTCGTAC -0.623961901462  
CGTCGTAG -1.14366181125  
CGTCGTCA 0.278873988382  
CGTCGTCC -0.443989321473  
CGTCGTGA -0.348641719573  
CGTCGTGC -0.621233937061  
CGTCGTTA -0.565795305205  
CGTCGTTC 0.11115205866  
CGTCTAAA 1.98886466503  
CGTCTAAC -0.155589316376  
CGTCTAAG -0.383805480478  
CGTCTACA -0.325640966001  
CGTCTACC -0.482555335293  
CGTCTAGA 0.222970078716  
CGTCTAGC -0.428100552625  
CGTCTATA -0.0429587776197  
CGTCTATC 0.758412408222  
CGTCTCAA 0.405371263154

CGTCTCAC -1.06951817868  
CGTCTCAG -0.434294264229  
CGTCTCCA -1.09381234211  
CGTCTCCC -0.963721082493  
CGTCTCGA -0.924448304391  
CGTCTCGC -0.52028655367  
CGTCTCTA -0.983374125783  
CGTCTCTC -1.41989110643  
CGTCTGAA 1.04080127381  
CGTCTGAC -0.948761203843  
CGTCTGAG -0.702448751472  
CGTCTGCA -0.550848125414  
CGTCTGCC -1.51194928788  
CGTCTGGA -0.65600653152  
CGTCTGGC -0.259167859704  
CGTCTGTA -0.559839749224  
CGTCTGTC -0.243954420262  
CGTCTTAA 0.691058292665  
CGTCTTAC 0.432909880585  
CGTCTTAG -0.627440139344  
CGTCTTCA -0.230490092304  
CGTCTTCC -0.772935113089  
CGTCTTGA -1.23730859896  
CGTCTTGC -0.00574696163411  
CGTCTTTA -0.354000012897  
CGTCTTTC -0.993645627885  
CGTGAAAA 3.07936239716  
CGTGAAAC -0.443156817684  
CGTGAAAG 0.619547278974  
CGTGAACA 0.235217398135  
CGTGAACC -0.398863202783  
CGTGAACG 0.0939140882499  
CGTGAAGA -0.861495071575  
CGTGAAGC -0.467328364281  
CGTGAATA -0.0214585710107  
CGTGAATC 1.41371592266  
CGTGACAA 0.485933855917  
CGTGACAC -1.17839735003  
CGTGACAG -1.11216468931  
CGTGACCA -0.709971055018  
CGTGACCC -0.327017230703  
CGTGACGA -1.0484414061  
CGTGACGC -0.618966878733  
CGTGACTA 0.382781869294  
CGTGACTC -0.3449344859  
CGTGAGAA 0.607032867191  
CGTGAGAC -1.06181205396  
CGTGAGAG -0.381476801465  
CGTGAGCA 1.38460826771  
CGTGAGCC -1.26915712535  
CGTGAGGA -0.0342871233826  
CGTGAGGC 0.013588193863  
CGTGAGTA 0.878626454854  
CGTGAGTC -0.497707778584

CGTGATAA 2.18259760208  
CGTGATAC 2.79439649621  
CGTGATAG -0.0197011324062  
CGTGATCA 0.733752892414  
CGTGATCC 4.59931696153  
CGTGATGA -0.385530235138  
CGTGATGC 1.00157908296  
CGTGATTA 2.0790885902  
CGTGATTC 1.93743241862  
CGTGCAAA 0.427150844628  
CGTGCAAC -0.142627738267  
CGTGCAAG -0.263852905404  
CGTGCACA 0.244955131867  
CGTGCACC -1.04459844038  
CGTGCACG -0.812514121016  
CGTGCAGA -0.0474100394345  
CGTGCAGC -0.0532569265046  
CGTGCATA 1.47596738747  
CGTGCATC -0.327781243932  
CGTGCCAA -0.430374689005  
CGTGCCAC -0.919503660736  
CGTGCCAG -1.09837435462  
CGTGCCCA 0.446728319307  
CGTGCCCC -0.498416832823  
CGTGCCGA -0.992333690182  
CGTGCCGC 0.0196520024002  
CGTGCCTA -0.19828120981  
CGTGCCTC -0.733212045992  
CGTGCGAA 0.709951486286  
CGTGCGAC -0.493203015026  
CGTGCGAG -0.92732053614  
CGTGCGCA 0.712457116592  
CGTGCGCC -0.370605122213  
CGTGCGGA -0.866278793642  
CGTGCGGC -0.980057434022  
CGTGCGTA 0.870886813485  
CGTGCGTC -0.53211793516  
CGTGCTAA -0.121887381327  
CGTGCTAC 0.522218447129  
CGTGCTAG -0.373390960096  
CGTGCTCA 0.533258126019  
CGTGCTCC 0.0663446604759  
CGTGCTGA -0.443787388821  
CGTGCTGC -0.0739458634806  
CGTGCTTA 0.0935972413468  
CGTGCTTC -0.294176736184  
CGTGGAAG 0.53687854947  
CGTGGAAC -0.582654599849  
CGTGGAAG -0.849567721728  
CGTGGAAC 0.747987687118  
CGTGGAAC -1.25345446762  
CGTGGAAG -0.606584868153  
CGTGGAAG -0.739512136549  
CGTGGAAG 4.32791968571

CGTGGATC 3.38088885733  
CGTGGCAA 1.36043942743  
CGTGGCAC -0.507460084775  
CGTGGCAG -0.827640750237  
CGTGGCCA -0.827379903213  
CGTGGCCC -0.89188156393  
CGTGGCGA 0.0885077058099  
CGTGGCGC -0.186196477402  
CGTGGCTA -0.821838413257  
CGTGGCTC -1.14790676867  
CGTGGGAA 0.318355777188  
CGTGGGAC -0.729557273172  
CGTGGGAG -0.948271569207  
CGTGGGCA 0.552828106291  
CGTGGGCC -0.867305735674  
CGTGGGGA -0.377094030209  
CGTGGGGC -0.126249126606  
CGTGGGTA 0.42396030873  
CGTGGGTC -1.01687246276  
CGTGGTAA 0.868300410118  
CGTGGTAC 0.609100074647  
CGTGGTAG 0.102713355596  
CGTGGTCA 0.118109367137  
CGTGGTCC -0.860801422507  
CGTGGTGA -1.07996455029  
CGTGGTGC -0.285404115621  
CGTGGTTA -0.278904382369  
CGTGGTTC -0.0946348004566  
CGTGTAAC 1.38951481479  
CGTGTAAC -0.508138745028  
CGTGTAAG -0.674388648172  
CGTGTAACA 1.28307632222  
CGTGTAACC -0.361672412775  
CGTGTAGA 0.135273434361  
CGTGTAGC 1.67620047413  
CGTGTAATA 1.45030549463  
CGTGATATC 1.24612389601  
CGTGTCAC 1.39898212531  
CGTGTCAC 0.283737026264  
CGTGTCAG 0.539967494508  
CGTGTCAC 0.0866174496468  
CGTGTCAC -0.758554801968  
CGTGTCGA -1.01931730509  
CGTGTCGC -0.445475504154  
CGTGTCCTA 0.111575284517  
CGTGTCCTC -0.617507967369  
CGTGTCGAA -0.10102544844  
CGTGTCGAC -0.281899230955  
CGTGTCGAG -0.901830390145  
CGTGTCGCA 0.315266623971  
CGTGTCGCC -1.02036319132  
CGTGTCGGA -0.0472965824291  
CGTGTCGGC -0.406068451248  
CGTGTCGTA 0.491998705345

CGTGTGTC -0.393212003025  
CGTGTTAA 0.20344818756  
CGTGTTAC 0.0574025830278  
CGTGTTAG 0.251215044072  
CGTGTTCA 0.341357988005  
CGTGTTCC -0.263079107809  
CGTGTTGA -0.222943848289  
CGTGTTGC -0.470366930245  
CGTGTTTA 0.397123667486  
CGTGTTTC 0.453932943238  
CGTTAAAA 2.0365865551  
CGTTAAAC -0.405910860508  
CGTTAAAG 0.515217629452  
CGTTAACA 0.180926243369  
CGTTAACC -0.85311028661  
CGTTAACG 0.0101311901357  
CGTTAAGA 0.170450310479  
CGTTAAGC 0.0506980026327  
CGTTAATA 0.676746680282  
CGTTAATC 0.970988576177  
CGTTACAA 1.5453393723  
CGTTACAC -0.897532971866  
CGTTACAG 0.670018783952  
CGTTACCA 0.240593802944  
CGTTACCC 1.03750831434  
CGTTACGA -0.542435028242  
CGTTACGC -0.432368825985  
CGTTACTA -0.00707513722006  
CGTTACTC -0.284657381165  
CGTTAGAA 1.87943798556  
CGTTAGAC -0.603741156789  
CGTTAGAG -0.92172554444  
CGTTAGCA -0.0163138683061  
CGTTAGCC 1.49072720707  
CGTTAGGA 1.01282756438  
CGTTAGGC -0.977631952242  
CGTTAGTA 0.524825876473  
CGTTAGTC 0.287961374069  
CGTTATAA 2.01917746238  
CGTTATAC 1.29837532281  
CGTTATAG 2.67666309853  
CGTTATCA 1.03072878987  
CGTTATCC 2.58870165177  
CGTTATGA 0.288650026865  
CGTTATGC -0.540863076228  
CGTTATTA 0.749700783811  
CGTTATTC 1.35046915888  
CGTTCAA 0.373321845003  
CGTTCAAC -0.187201144389  
CGTTCAAG -0.855702102605  
CGTTCACA -0.719381532947  
CGTTCACC -0.16678304698  
CGTTCAGA 0.405381672054  
CGTTCAGC 0.572942055654

CGTTCATA 0.147940856967  
CGTTCATC -0.152331747164  
CGTTCCAA -0.325629516212  
CGTTCCAC -0.281517224341  
CGTTCCAG -0.660348291711  
CGTTCCCA 0.234390515153  
CGTTCCCC -0.243701484002  
CGTTCCGA -0.983864176775  
CGTTCCGC -0.299021038046  
CGTTCCTA -0.902177631035  
CGTTCCTC -0.567566483557  
CGTTCGAA -0.342202774295  
CGTTCGAC 0.0566833280671  
CGTTCGAG -0.803052847657  
CGTTCGCA 0.690645475708  
CGTTCGCC -0.793577834551  
CGTTCGGA -0.392026429363  
CGTTCGGC -0.899978230555  
CGTTCGTA 1.11255981114  
CGTTCGTC -0.275023736429  
CGTTCTAA 0.390520261595  
CGTTCTAC 0.157947140308  
CGTTCTAG 1.69706657058  
CGTTCTCA 0.0572922486923  
CGTTCTCC 0.287848541597  
CGTTCTGA 0.767158798358  
CGTTCTGC 0.187834838196  
CGTTCTTA 0.113102061907  
CGTTCTTC -0.579245893416  
CGTTGAAA 0.967779928793  
CGTTGAAC 0.206826083651  
CGTTGAAG -0.528186285612  
CGTTGACA -0.176360067303  
CGTTGACC -0.362412069179  
CGTTGAGA 0.235265487251  
CGTTGAGC -0.595954467194  
CGTTGATA 0.595774185053  
CGTTGATC -0.0310992937983  
CGTTGCAA 0.279499771425  
CGTTGCAC 0.112485230518  
CGTTGCAG 0.875061614927  
CGTTGCCA -0.0189766729957  
CGTTGCCC -1.48928952986  
CGTTGCGA 1.17457770024  
CGTTGCGC 0.517888969439  
CGTTGCTA -0.263783998489  
CGTTGCTC -0.839222524617  
CGTTGGAA -0.171874247941  
CGTTGGAC -0.204214698925  
CGTTGGAG -0.71846076169  
CGTTGGCA -0.251485259105  
CGTTGGCC -0.760239378276  
CGTTGGGA 0.301827277372  
CGTTGGGC -1.02853605109

CGTTGGTA -0.123527823901  
CGTTGGTC -0.606270935742  
CGTTGTAA 0.939472301861  
CGTTGTAC 0.555100369069  
CGTTGTAG 0.445430121352  
CGTTGTCA 1.73747350238  
CGTTGTCC 0.597557021373  
CGTTGTGA 0.426165746372  
CGTTGTGC -0.937433406612  
CGTTGTTA 1.41631564942  
CGTTGTTC 0.613924807779  
CGTTTAAA 0.514531058436  
CGTTTAAC -0.433923291048  
CGTTTAAG 0.488784228977  
CGTTTACA 1.06617067657  
CGTTTACC 0.351357817828  
CGTTTAGA 0.516581611652  
CGTTTAGC -0.601521146687  
CGTTTATA 1.05845268572  
CGTTTATC -0.0478757336016  
CGTTTCAA 0.53737817665  
CGTTTCAC -0.625400203205  
CGTTTCAG 0.991670851457  
CGTTTCCA 0.0258709035411  
CGTTTCCC 0.0606499515177  
CGTTTCGA 0.965960869503  
CGTTTCGC -0.385558130989  
CGTTTCTA 0.57565086768  
CGTTTCTC 0.718348137397  
CGTTTGAA 0.729291638055  
CGTTTGAC 0.482412525191  
CGTTTGAG 0.776340696853  
CGTTTGCA 0.343106474956  
CGTTTGCC 0.628457088833  
CGTTTGGA 0.316591260531  
CGTTTGGC -0.380797516678  
CGTTTGTA 0.163466563397  
CGTTTGTC 0.101127455656  
CGTTTTAA -0.281648792831  
CGTTTTAC -0.429430393635  
CGTTTTAG 0.316715334614  
CGTTTTCA 1.66353846415  
CGTTTTCC 0.121215382771  
CGTTTTGA 0.442738796277  
CGTTTTGC 0.015725349124  
CGTTTTTA 0.73512978165  
CGTTTTTC 0.981373118928  
CTAAAAAA 0.693900130428  
CTAAAAAC 0.112871192514  
CTAAAAAG 0.392430294667  
CTAAAACA -0.0941895077327  
CTAAAACC 0.49801296752  
CTAAAAGA 1.00358695969  
CTAAAAGC 0.216114569277



CTAAAATA 2.43032212577  
CTAAAATC 2.42941217977  
CTAAACAA -0.0466376990859  
CTAAACAC 1.65577675592  
CTAAACAG -0.0028183136493  
CTAAACCA -0.274153552425  
CTAAACCC 0.119724411995  
CTAAACGA 0.43353545545  
CTAAACGC 0.381926257748  
CTAAACTA 0.795884446697  
CTAAACTC -0.288652525  
CTAAAGAA 0.944418194584  
CTAAAGAC 0.00580691689567  
CTAAAGAG -0.466055147685  
CTAAAGCA -0.210595146187  
CTAAAGCC -0.321256321144  
CTAAAGGA 0.269466841301  
CTAAAGGC 0.553947062995  
CTAAAGTA 2.63641313293  
CTAAAGTC -0.195530762186  
CTAAATAA 1.08399029629  
CTAAATAC 2.00756113045  
CTAAATAG -0.587666484995  
CTAAATCA 1.2810116129  
CTAAATCC 3.24313914576  
CTAAATGA -0.282520225904  
CTAAATGC 0.486599400956  
CTAAATTA 2.25034538222  
CTAAATTC 1.62489542447  
CTAACAAA 1.38435366603  
CTAACAAC 0.201163642281  
CTAACAAAG -0.137853592388  
CTAACACA -0.383799859672  
CTAACACC 0.335979709594  
CTAACAGA 0.180696414866  
CTAACAGC -0.962448074074  
CTAACATA 1.90568756487  
CTAACATC 1.87104549801  
CTAACCAA 0.182570433146  
CTAACCCAC -0.276480357836  
CTAACCCAG -0.313329111404  
CTAACCCA -1.32710346929  
CTAACCCC -0.786473344234  
CTAACCGA 0.842327707539  
CTAACCGC -0.356922415542  
CTAACCTA 0.0327688812904  
CTAACCTC -0.979973746469  
CTAACGAA 2.60884578694  
CTAACGAC 0.176755605486  
CTAACGAG -0.24562442411  
CTAACGCA 0.050690300047  
CTAACGCC -0.972956899087  
CTAACGGA 0.34807401819  
CTAACGGC -0.0579565446633

CTAACGTA 2.03704704481  
CTAACGTC -0.644291315047  
CTAACTAA 0.46296578629  
CTAACTAC 0.732628106726  
CTAACTAG 1.15559894546  
CTAACTCA 0.205329700247  
CTAACTCC 1.32557835732  
CTAACTGA 0.167843922025  
CTAACTGC -0.109894247236  
CTAACTTA 1.3723930077  
CTAACTTC 0.202702285816  
CTAAGAAA 0.215305589602  
CTAAGAAC 0.678978972885  
CTAAGAAG -0.689993254061  
CTAAGACA -0.569735281873  
CTAAGACC -0.038528125426  
CTAAGAGA 0.462393504992  
CTAAGAGC -0.169122551249  
CTAAGATA 3.09346541519  
CTAAGATC 1.51506696148  
CTAAGCAA 0.255822231203  
CTAAGCAC -0.697941697955  
CTAAGCAG -0.891571795079  
CTAAGCCA -0.516177121815  
CTAAGCCC -0.588176104718  
CTAAGCGA -0.495670340581  
CTAAGCGC -0.310733964562  
CTAAGCTA 1.85936608815  
CTAAGCTC -0.535606998298  
CTAAGGAA 0.796428623967  
CTAAGGAC -0.869727678428  
CTAAGGAG -0.651614808611  
CTAAGGCA -0.369314210488  
CTAAGGCC 0.419665388586  
CTAAGGGA -0.266822564453  
CTAAGGGC -0.660075370364  
CTAAGGTA 1.86108917739  
CTAAGGTC -0.8241308693  
CTAAGTAA 1.1966978609  
CTAAGTAC -0.288339425301  
CTAAGTAG 0.361630152642  
CTAAGTCA -0.923472990501  
CTAAGTCC 0.72213822591  
CTAAGTGA -0.148808751014  
CTAAGTGC -0.557467769188  
CTAAGTTA 1.8004048765  
CTAAGTTC 0.931579441491  
CTAATAAA -0.202939192371  
CTAATAAC 1.39733856007  
CTAATAAG 0.329943172374  
CTAATACA 1.15394455496  
CTAATACC -0.0418752111738  
CTAATAGA 1.8146690243  
CTAATAGC -0.351373014822

CTAATATA 2.8228369407  
CTAATATC 1.92390792722  
CTAATCAA 1.16413507583  
CTAATCAC 0.0216700798501  
CTAATCAG -0.360545961663  
CTAATCCA 0.0980106147672  
CTAATCCC 0.45270968936  
CTAATCGA 1.19771418586  
CTAATCGC 0.890373106204  
CTAATCTA 2.2034791037  
CTAATCTC 1.43878659001  
CTAATGAA 0.74779470612  
CTAATGAC -0.396320100439  
CTAATGAG 0.457360802046  
CTAATGCA -0.100114045194  
CTAATGCC 0.0431615429834  
CTAATGGA -0.279702120433  
CTAATGGC -0.66598491901  
CTAATGTA 2.17848150683  
CTAATGTC -0.389134628883  
CTAATTAA 0.703422608116  
CTAATTAC 1.16698961245  
CTAATTAG 0.303004523914  
CTAATTCA 0.0629230470072  
CTAATTCC 1.05567309317  
CTAATTGA 0.0166579865261  
CTAATTGC 1.87868729573  
CTAATTTA 2.25667711583  
CTAATTTTC 1.25719688338  
CTACAAA 0.157742501342  
CTACAAAC -0.55664671519  
CTACAAAG -0.930842075045  
CTACAACA 1.45953444135  
CTACAACC -0.298206645744  
CTACAAGA 0.756107669678  
CTACAAGC -0.505215093315  
CTACAATA 1.88828138664  
CTACAATC 1.24397383371  
CTACACAA 0.680638359655  
CTACACAC 0.663602738253  
CTACACAG -0.383633733635  
CTACACCA 0.512886035947  
CTACACCC -0.264457662469  
CTACACGA 0.716400424108  
CTACACGC -0.949807090073  
CTACACTA 1.02480987322  
CTACACTC -0.435973427909  
CTACAGAA 0.0274099634325  
CTACAGAC 1.00873395235  
CTACAGAG -0.925069715696  
CTACAGCA -0.111845707728  
CTACAGCC -0.431306077339  
CTACAGGA 0.407002337718  
CTACAGGC -0.128801805138

CTACAGTA 1.63822464492  
CTACAGTC -0.467935203126  
CTACATAA 0.0204303799105  
CTACATAC 0.684279184549  
CTACATAG 0.00999171088136  
CTACATCA 0.494307191093  
CTACATCC 1.09292446298  
CTACATGA 0.275312479303  
CTACATGC -0.375984441514  
CTACATTA 1.92651285843  
CTACATTC 0.73398334545  
CTACCAA 0.0584289005261  
CTACCAAC 1.00616690954  
CTACCAAG -0.72232530541  
CTACCACA 0.215968428327  
CTACCACC -0.192986202596  
CTACCAGA -0.443200951419  
CTACCAGC -1.18431189494  
CTACCATA 1.92354424027  
CTACCATC 0.827852675432  
CTACCCAA -0.808955526429  
CTACCCAC 0.137362708684  
CTACCCAG -0.569948456136  
CTACCCCA -0.794042071472  
CTACCCCC -0.705713815091  
CTACCCGA 1.70202911754  
CTACCCGC -0.641652450826  
CTACCCTA -0.107994414885  
CTACCCTC -0.979210982308  
CTACCGAA 0.201416994897  
CTACCGAC -0.474672467466  
CTACCGAG -0.838396474347  
CTACCGCA -0.505966824042  
CTACCGCC -0.334122137376  
CTACCGGA 0.146191537304  
CTACCGGC 0.0660382224724  
CTACCGTA 1.84751347421  
CTACCGTC -1.29529886846  
CTACCTAA -0.431751161885  
CTACCTAC 0.513861974371  
CTACCTAG 0.196702179745  
CTACCTCA 0.174641349804  
CTACCTCC -0.129178399125  
CTACCTGA 0.640199160267  
CTACCTGC -1.32224563586  
CTACCTTA 0.67748279766  
CTACCTTC -0.610913721309  
CTACGAAA 1.48039096161  
CTACGAAC 0.110064953189  
CTACGAAG -0.486717646056  
CTACGACA -0.192105609692  
CTACGACC -1.43285747263  
CTACGAGA 0.375937809644  
CTACGAGC -0.938000067105

CTACGATA 1.1616977279  
CTACGATC 1.55322515462  
CTACGCAA 0.395570243313  
CTACGCAC -0.485884934089  
CTACGCAG -0.684314782986  
CTACGCCA -0.767227080739  
CTACGCCC -0.253826012442  
CTACGCGA 1.05140148896  
CTACGCGC -0.100651560768  
CTACGCTA -0.187433887384  
CTACGCTC 0.0998617334678  
CTACGGAA 0.567676401537  
CTACGGAC -0.256538779849  
CTACGGAG -0.67930393873  
CTACGGCA -0.517353119289  
CTACGGCC -0.506719803838  
CTACGGGA -1.22900167256  
CTACGGGC -0.986908571723  
CTACGGTA 1.7995261572  
CTACGGTC -0.445672024178  
CTACGTAA 0.236991907335  
CTACGTAC -0.0582444548256  
CTACGTAG -0.691556462599  
CTACGTCA -0.432285971145  
CTACGTCC 0.0241024315031  
CTACGTGA 0.129052867796  
CTACGTGC -0.507105765834  
CTACGTTA 0.47044728695  
CTACGTTC -0.564287680191  
CTACTAAA 0.136509387096  
CTACTAAC 0.782476951331  
CTACTAAG 0.0206866470181  
CTACTACA 1.30567425138  
CTACTACC -0.100026402259  
CTACTAGA 0.625420812827  
CTACTAGC 0.334963800996  
CTACTATA 2.03997902364  
CTACTATC 1.2177375778  
CTACTCAA -0.762946524878  
CTACTCAC 0.426165746372  
CTACTCAG -0.706772608356  
CTACTCCA -0.221289041434  
CTACTCCC -0.379356300443  
CTACTCGA 0.285078108886  
CTACTCGC -0.484948133128  
CTACTCTA 0.246171724049  
CTACTCTC -1.29630436816  
CTACTGAA 0.0341070494199  
CTACTGAC -0.582655224383  
CTACTGAG -1.25397699438  
CTACTGCA 0.0964967444128  
CTACTGCC -0.0002874938063  
CTACTGGA -0.266118506486  
CTACTGGC -0.510836731798

CTACTGTA 0.945415575342  
CTACTGTC 0.860582002904  
CTACTTAA 0.271821750741  
CTACTTAC 0.960195588206  
CTACTTCA -0.555395565461  
CTACTTCC 0.113232173152  
CTACTTGA 0.323258785244  
CTACTTGC 1.85816510932  
CTACTTTA 2.46518631854  
CTACTTTC -0.978708024281  
CTAGAAAA 0.169689628098  
CTAGAAAC 0.189228798027  
CTAGAAAG -0.373724877594  
CTAGAACA 0.227386574806  
CTAGAACC -0.225611857428  
CTAGAAGA 0.694282761576  
CTAGAAGC -0.185362516368  
CTAGAATA 1.79620592641  
CTAGAATC 4.47813093185  
CTAGACAA 0.258759414485  
CTAGACAC 0.318367851511  
CTAGACAG -1.054812069  
CTAGACCA -0.573952551625  
CTAGACCC -0.267445016648  
CTAGACGA 0.093174223668  
CTAGACGC -0.565243217172  
CTAGACTA -0.0902867949255  
CTAGACTC -0.934960668429  
CTAGAGAA 1.44216427792  
CTAGAGAC -0.983726987478  
CTAGAGAG -0.467037123271  
CTAGAGCA -0.799605003762  
CTAGAGCC -1.1068544851  
CTAGAGGA 0.344517921739  
CTAGAGGC -0.819678774773  
CTAGAGTA 0.246171724049  
CTAGAGTC -1.25143534929  
CTAGATAA 2.0064028281  
CTAGATAC 3.61667999401  
CTAGATAG -0.393212003025  
CTAGATCA -0.175418894603  
CTAGATCC 2.15774448074  
CTAGATGA -0.561644860588  
CTAGATGC 0.381565693467  
CTAGATTA 5.02645219281  
CTAGATTC 9.47506265275  
CTAGCAA 1.12120086321  
CTAGCAAC -0.101990145253  
CTAGCAAG -0.838658778616  
CTAGCACA 0.195798687261  
CTAGCACC -0.560678290174  
CTAGCAGA 0.12886071951  
CTAGCAGC -0.862633597011  
CTAGCATA -0.0451275759354

CTAGCATC 0.421392016848  
CTAGCCAA 0.070003180499  
CTAGCCAC -0.128245761723  
CTAGCCAG -0.764604246224  
CTAGCCCA -1.46981947503  
CTAGCCCC 0.228239688215  
CTAGCCGA -0.0451275759354  
CTAGCCGC -1.16006019982  
CTAGCCTA -0.533623894751  
CTAGCCTC -1.31330064392  
CTAGCGAA -0.0974674783873  
CTAGCGAC -0.303933830469  
CTAGCGAG 0.0132950792509  
CTAGCGCA -1.06118814452  
CTAGCGCC -1.3294284011  
CTAGCGGA 1.81832046628  
CTAGCGGC -0.084673275384  
CTAGCGTA -0.207574691708  
CTAGCGTC -0.787022309598  
CTAGCTAA -0.376532365988  
CTAGCTAC 0.473837049186  
CTAGCTAG -0.842950159734  
CTAGCTCA -0.356144038032  
CTAGCTCC 0.00777836247544  
CTAGCTGA -0.0933286917377  
CTAGCTGC -1.13453632899  
CTAGCTTA 1.22789770467  
CTAGCTTC -1.22589648964  
CTAGGAAA 0.381370422511  
CTAGGAAC -0.407717637297  
CTAGGAAG -0.0646236530199  
CTAGGACA 0.166814273679  
CTAGGACC -1.59770612971  
CTAGGAGA 0.600732360277  
CTAGGAGC 0.0150718784086  
CTAGGATA 1.75061723623  
CTAGGATC 2.56588513572  
CTAGGCAA -0.169122551249  
CTAGGCAC -0.631738598514  
CTAGGCAG -1.12763460404  
CTAGGCCA -1.09487717254  
CTAGGCCC -0.615733041813  
CTAGGCCGA 1.04510722739  
CTAGGCCGC -0.808313921859  
CTAGGCTA -0.545692181097  
CTAGGCTC -0.76961404959  
CTAGGGAA 0.433263366815  
CTAGGGAC -1.25965234279  
CTAGGGAG -1.21449957732  
CTAGGGCA -1.15804212237  
CTAGGGCC -1.05827177904  
CTAGGGGA -0.25843028508  
CTAGGGGC -0.56096474309  
CTAGGGTA 0.856000005311

CTAGGGTC -1.54619831469  
CTAGGTAA 0.607790010546  
CTAGGTAC 0.270368668361  
CTAGGTCA -0.812883428773  
CTAGGTCC -0.28521966992  
CTAGGTGA -0.124962586618  
CTAGGTGC -0.590496456612  
CTAGGTTA -0.72214447125  
CTAGGTTC -0.055998422475  
CTAGTAAA 0.487062805166  
CTAGTAAC 0.4951688398  
CTAGTAAG -0.720076847438  
CTAGTACA -0.285162212794  
CTAGTACC -0.919625653039  
CTAGTAGA 1.46121277232  
CTAGTAGC 0.332765857761  
CTAGTATA 1.31434673832  
CTAGTATC 0.513935461202  
CTAGTCAA -0.0318070989695  
CTAGTCAC -0.376023787155  
CTAGTCAG -0.513701260961  
CTAGTCCA -0.539653978453  
CTAGTCCC -1.25245625416  
CTAGTCGA 0.760203571661  
CTAGTCGC -0.806540869905  
CTAGTCTA -0.0984013648573  
CTAGTCTC -0.162073019922  
CTAGTGAA -0.0649315482694  
CTAGTGAC -1.10239572888  
CTAGTGAG -0.861382655459  
CTAGTGCA 0.73728983649  
CTAGTGCC -1.19840741857  
CTAGTGGA 1.49374870244  
CTAGTGGC 0.070003180499  
CTAGTGTA 1.20211298682  
CTAGTGTC -1.10299382425  
CTAGTTAA 0.330104926673  
CTAGTTAC 0.97454862801  
CTAGTTCA 0.0222304950033  
CTAGTTCC 0.221550096635  
CTAGTTGA -0.13203647477  
CTAGTTGC 1.01997140034  
CTAGTTTA -0.360636727267  
CTAGTTTC -0.545560820785  
CTATAAAA 0.626865776266  
CTATAAAC 0.731213745451  
CTATAAAG -0.54842930533  
CTATAACA 0.0158052894728  
CTATAACC 0.381751388235  
CTATAAGA 1.31774690946  
CTATAAGC 1.06308506238  
CTATAATA 2.34690624545  
CTATAATC 2.14088289614  
CTATACAA 0.898076524602



CTATACAC 0.948966883699  
CTATACAG -0.996144596495  
CTATACCA -1.22570746402  
CTATACCC -0.220598723214  
CTATACGA 2.12153941352  
CTATACGC 0.995947243759  
CTATACTA 0.1810867486  
CTATACTC 0.270694675095  
CTATAGAA 0.360935462685  
CTATAGAC -0.459127816838  
CTATAGAG -0.0150443989137  
CTATAGCA -0.316659959269  
CTATAGCC -1.192894449  
CTATAGGA 1.67047849385  
CTATAGGC -0.248727733429  
CTATAGTA 1.42885004629  
CTATAGTC -0.879355910536  
CTATATAA 1.60539351841  
CTATATAC 1.60788686621  
CTATATAG 1.39230627348  
CTATATCA 1.99740537531  
CTATATCC 2.6678305227  
CTATATGA 0.24748491082  
CTATATGC 1.27010225343  
CTATATTA 2.35372657281  
CTATATTC 0.177131574939  
CTATCAA 1.35861120831  
CTATCAAC -0.271065856454  
CTATCAAG -0.79100642  
CTATCACA 0.200020953286  
CTATCACC 0.0361609334843  
CTATCAGA 0.0343189746153  
CTATCAGC -0.110038722762  
CTATCATA 1.08143969954  
CTATCATC 0.628657147883  
CTATCCAA 1.75553793941  
CTATCCAC 0.882426952267  
CTATCCAG 0.351860775856  
CTATCCCA -0.389437319683  
CTATCCCC 1.06552178577  
CTATCCGA 0.68323850277  
CTATCCGC 0.440008750097  
CTATCCTA 0.90933208407  
CTATCCTC 0.300588201967  
CTATCGAA 1.99441635571  
CTATCGAC -0.00558562369068  
CTATCGAG 0.399184629602  
CTATCGCA 0.00208261262724  
CTATCGCC 0.13633285216  
CTATCGGA 1.50501696076  
CTATCGGC 1.73548894158  
CTATCGTA 1.55359571144  
CTATCGTC -0.423752130738  
CTATCTAA 0.5462142915

CTATCTAC 0.821232198946  
CTATCTCA 0.439574282628  
CTATCTCC 0.726704401977  
CTATCTGA 0.642779942828  
CTATCTGC -0.324877993662  
CTATCTTA 1.109046183  
CTATCTTC -0.000663046903015  
CTATGAAA 0.485722555256  
CTATGAAC -0.211907916602  
CTATGAAG -0.833187860999  
CTATGACA -0.0774332611946  
CTATGACC -0.673719564107  
CTATGAGA 0.398511590155  
CTATGAGC -0.423116771508  
CTATGATA 2.29903904715  
CTATGATC 0.668987886538  
CTATGCAA 1.47766736895  
CTATGCAC 0.0328798401599  
CTATGCAG -0.52847565302  
CTATGCCA -0.270455478583  
CTATGCCC 1.5749166768  
CTATGCGA 1.05659677892  
CTATGCGC -0.399441104888  
CTATGCTA -0.310108597875  
CTATGCTC -0.601666454925  
CTATGGAA 1.29399484152  
CTATGGAC -0.703281463438  
CTATGGAG -0.715286880031  
CTATGGCA -0.85690287326  
CTATGGCC -0.644096044091  
CTATGGGA -0.0730937909612  
CTATGGGC -0.806730728234  
CTATGGTA 3.08808026691  
CTATGGTC -1.07945243243  
CTATGTAA 1.50263040827  
CTATGTAC 0.886903611797  
CTATGTCA -0.671647360379  
CTATGTCC 0.642308627855  
CTATGTGA 1.08505949846  
CTATGTGC 0.729267489408  
CTATGTTA 1.23990395398  
CTATGTTC -0.595623047831  
CTATTAAC 0.676746680282  
CTATTAAG 0.488410133127  
CTATTACA 1.04013427153  
CTATTACC 0.196176738494  
CTATTAGA 0.658908116366  
CTATTAGC 0.458324249791  
CTATTATA 1.05937075066  
CTATTATC 1.14522939153  
CTATTCAA 0.233163097715  
CTATTCAC 0.0906342439934  
CTATTCAG -0.944988602281

CTATTCCA 0.0542418165825  
CTATTCCC 0.918757342636  
CTATTCGA -0.144343749452  
CTATTCGC 0.791307029019  
CTATTCTA 1.31863562131  
CTATTCTC -0.672835015821  
CTATTGAA 0.960062978825  
CTATTGAC -0.785425584403  
CTATTGAG 0.445383489482  
CTATTGCA -0.218713463323  
CTATTGCC -0.49987241334  
CTATTGGA 0.716906712983  
CTATTGGC 0.053713044484  
CTATTGTA 2.48984458528  
CTATTGTC -0.685821158932  
CTATTTAA 0.292038748211  
CTATTTAC 1.38092809718  
CTATTTCA 0.509014758016  
CTATTTCC 0.704051722007  
CTATTTGA -0.32478701988  
CTATTTGC 1.44555966096  
CTATTTTA 0.468729402164  
CTATTTTC 0.844883300563  
CTCAAAAA 0.608341890402  
CTCAAAAC -0.157955051072  
CTCAAAAAG -0.656571318411  
CTCAAACA -0.261215082073  
CTCAAACC -0.609959225218  
CTCAAAGA 0.371766963584  
CTCAAAGC 1.41805934828  
CTCAAATA 0.929213706795  
CTCAAATC 1.64606212994  
CTCAACAA -0.24444384672  
CTCAACAC -0.468640926517  
CTCAACAG -0.0428871643906  
CTCAACCA -0.821563201952  
CTCAACCC 0.330585817834  
CTCAACGA -0.88191358534  
CTCAACGC 0.348639013259  
CTCAACTA 1.42544175622  
CTCAACTC -1.0595822595  
CTCAAGAA -0.178164137777  
CTCAAGAC -0.774058233353  
CTCAAGAG -1.3207856836  
CTCAAGCA -0.523661536966  
CTCAAGCC -1.20368514701  
CTCAAGGA 0.398762444635  
CTCAAGGC 0.0259439740161  
CTCAAGTA 0.576469839899  
CTCAAGTC -0.292560858613  
CTCAATAA 1.92796219361  
CTCAATAC 0.964652054471  
CTCAATCA 0.639991190454  
CTCAATCC 0.596818822215

CTCAATGA 0.117864549819  
CTCAATGC -0.444268904515  
CTCAATTA 0.384742905974  
CTCAATTC 0.329311560348  
CTCACAAA 0.0951348439922  
CTCACAAC -0.116746634005  
CTCACAAAG -0.637166839643  
CTCACACA -0.918595796515  
CTCACACC 0.324903183199  
CTCACAGA -0.222488146665  
CTCACAGC -0.398869448123  
CTCACATA 1.26709054243  
CTCACATC -0.219941921651  
CTCACCAA 0.43771254685  
CTCACCCAC -0.629728848183  
CTCACCCAG -0.055997381585  
CTCACCCA -1.41649135165  
CTCACCCC -0.394512074582  
CTCACCGA 0.273399323561  
CTCACCGC -0.693375105533  
CTCACCTA 0.692789292665  
CTCACCTC -0.89086274084  
CTCACGAA 0.144815272602  
CTCACGAC -0.0620649373261  
CTCACGAG -0.974156004318  
CTCACGCA -0.490735064936  
CTCACGCC -1.21792077443  
CTCACGGA 2.07481053248  
CTCACGGC -0.171528880653  
CTCACGTA -0.18339502617  
CTCACGTC -0.434203914981  
CTCACTAA 0.266083532583  
CTCACTAC -0.481155754656  
CTCACTCA -1.00018075139  
CTCACTCC -0.207328417144  
CTCACTGA 0.713773217855  
CTCACTGC -0.868972200497  
CTCACTTA 0.384885716076  
CTCACTTC 0.364684123778  
CTCAGAAA 0.569114078746  
CTCAGAAC -0.129777743562  
CTCAGAAAG -1.03490442403  
CTCAGACA 0.0724521863913  
CTCAGACC -0.78957082457  
CTCAGAGA 1.03593719504  
CTCAGAGC -0.495410742626  
CTCAGATA 2.40733698555  
CTCAGATC 2.24794071824  
CTCAGCAA -0.675388943421  
CTCAGCAC -1.46678798711  
CTCAGCAG -1.34696115155  
CTCAGCCA -1.04714216726  
CTCAGCCC -0.869358787027  
CTCAGCGA 0.193457725747

CTCAGCGC -0.494146269505  
CTCAGCTA -0.0143828092566  
CTCAGCTC -1.10815393212  
CTCAGGAA -0.384756645721  
CTCAGGAC -1.31037532678  
CTCAGGAG -0.374388965387  
CTCAGGCA -1.03695185457  
CTCAGGCC -1.02246745446  
CTCAGGGA -0.355712693233  
CTCAGGGC -0.374200980661  
CTCAGGTA 0.440294370301  
CTCAGGTC -0.595894095576  
CTCAGTAA -0.747973947371  
CTCAGTAC 0.133496218847  
CTCAGTCA -0.548743445919  
CTCAGTCC -1.08925261956  
CTCAGTGA 0.589634599727  
CTCAGTGC 0.0531928076832  
CTCAGTTA 0.192629801874  
CTCAGTTC -1.19940209301  
CTCATAAA 1.24668431116  
CTCATAAC 0.469735734575  
CTCATAAG -0.349453405562  
CTCATACA -1.0905651818  
CTCATACC -0.88191358534  
CTCATAGA -0.574701159683  
CTCATAGC 0.386821771397  
CTCATATA 1.08671201535  
CTCATATC 2.41872931795  
CTCATCAA 1.34174754193  
CTCATCAC -0.975872640036  
CTCATCAG 0.135558846387  
CTCATCCA -0.902625630073  
CTCATCCC -0.852202838745  
CTCATCGA 0.932160258087  
CTCATCGC -0.575681678023  
CTCATCTA 0.355610477839  
CTCATCTC -1.05551196341  
CTCATGAA 1.01336237364  
CTCATGAC 0.0619117183243  
CTCATGAG -0.675229062724  
CTCATGCA -0.198732956052  
CTCATGCC -1.33509084247  
CTCATGGA 0.149006728284  
CTCATGGC 0.0385083485168  
CTCATGTA 1.09959448582  
CTCATGTC -0.516375931797  
CTCATTAA 0.299879564084  
CTCATTAC 0.683156480641  
CTCATTCA -0.997850406958  
CTCATTCC -0.401874289253  
CTCATTGA 1.22325804178  
CTCATTGC -0.548602093063  
CTCATTTA 0.415682527253

CTCATTTTC -0.889428810834  
CTCCAAAA 0.509233344907  
CTCCAAAC -0.383800692384  
CTCCAAAG -0.128701879702  
CTCCAACA -0.181330941384  
CTCCAACC -0.791329512242  
CTCCAAGA 0.413507275419  
CTCCAAGC -0.108297522041  
CTCCAATA 0.971439906062  
CTCCAATC 0.00638814984802  
CTCCACAA -0.196306433383  
CTCCACAC -0.5625329479  
CTCCACAG -0.623769753176  
CTCCACCA -1.26942671585  
CTCCACCC -1.00531983329  
CTCCACGA -0.0472101885626  
CTCCACGC 0.0351675081088  
CTCCACTA 0.234320983704  
CTCCACTC -1.23995849661  
CTCCAGAA -0.421268567299  
CTCCAGAC -0.618518046984  
CTCCAGAG -0.975841621515  
CTCCAGCA -0.554681098594  
CTCCAGCC -1.4425315039  
CTCCAGGA 0.477178930484  
CTCCAGGC -0.906686349976  
CTCCAGTA 0.256899968665  
CTCCAGTC -0.825559803033  
CTCCATAA 0.32562243816  
CTCCATAC -0.639969123587  
CTCCATCA -0.376691830329  
CTCCATCC -0.871325652691  
CTCCATGA 0.0769151061737  
CTCCATGC -0.195082763149  
CTCCATTA 0.491738899211  
CTCCATTC -0.298410035641  
CTCCCAA -0.426103501152  
CTCCCAAC -0.588304342361  
CTCCCAAG -0.171683140545  
CTCCCACA -1.50310005782  
CTCCCACC -0.963651967399  
CTCCCAGA -0.226519513471  
CTCCCAGC -0.971546701372  
CTCCCATA -0.102511214766  
CTCCCATC -1.06535794969  
CTCCCCAA 0.124520000208  
CTCCCCAC -0.613934800322  
CTCCCCAG -0.356990281567  
CTCCCCCA -1.07518062005  
CTCCCCCC -1.13722307415  
CTCCCCGA -1.12453316832  
CTCCCCGC -0.708710537279  
CTCCCCTA -0.713069159888  
CTCCCCTC -1.29886266749

CTCCCGAA -0.188463119374  
CTCCCGAC -1.15455763915  
CTCCCGAG -0.93026417294  
CTCCCGCA -0.405800734351  
CTCCCGCC -0.563475786024  
CTCCCGGA 0.809367094318  
CTCCCGGC -1.13073541522  
CTCCCGTA -0.358123394375  
CTCCCGTC -1.30338741614  
CTCCCTAA -1.34017350813  
CTCCCTAC -1.20313368351  
CTCCCTCA -1.20410358478  
CTCCCTCC -1.16641837204  
CTCCCTGA -0.367060683729  
CTCCCTGC -1.12063420272  
CTCCCTTA -0.751037078338  
CTCCCTTC -1.53740237819  
CTCCGAAA -0.181621974216  
CTCCGAAC -0.787648508996  
CTCCGAAG -0.69845215039  
CTCCGACA -0.40675856129  
CTCCGACC -0.970402555131  
CTCCGAGA 0.451240369095  
CTCCGAGC -0.00474062922307  
CTCCGATA 0.581952415484  
CTCCGATC 0.13141881067  
CTCCGCAA 0.356276647412  
CTCCGCAC -1.02563758891  
CTCCGCAG -0.904286057733  
CTCCGCCA -1.12405581619  
CTCCGCCC -0.71192147462  
CTCCGCGA 0.160006437  
CTCCGCGC -0.549590313989  
CTCCGCTA -0.0649315482694  
CTCCGCTC -1.03834477351  
CTCCGGAA -0.265912410274  
CTCCGGAC -1.29041126557  
CTCCGGAG -1.13922845274  
CTCCGGCA -1.3250687376  
CTCCGGCC -1.48571990184  
CTCCGGGA -0.777557080857  
CTCCGGGC -0.697802218701  
CTCCGGTA -0.50031916331  
CTCCGGTC -0.736060753628  
CTCCGTAA 0.604227668755  
CTCCGTAC 0.315752927759  
CTCCGTCA -0.687687266449  
CTCCGTCC -1.41151423223  
CTCCGTGA 0.712918439022  
CTCCGTGC 0.470141265302  
CTCCGTTA -0.467210535537  
CTCCGTTC -0.609882823895  
CTCCTAAA -0.456991910645  
CTCCTAAC -0.506505796862

CTCCTAAG -0.699052952074  
CTCCTACA -0.499254749239  
CTCCTACC -1.23964435602  
CTCCTAGA -0.505774675756  
CTCCTAGC 0.454422161518  
CTCCTATA 0.184635975178  
CTCCTATC -0.76130962133  
CTCCTCAA -0.58219119564  
CTCCTCAC -0.566752091254  
CTCCTCAG -0.911051217924  
CTCCTCCA -0.892964089486  
CTCCTCCC -0.376134537846  
CTCCTCGA -0.635631110599  
CTCCTCGC -0.746294991869  
CTCCTCTA -0.00514657630655  
CTCCTCTC -1.1050431284  
CTCCTGAA -0.209111253464  
CTCCTGAC -0.850440403869  
CTCCTGCA -0.490597667462  
CTCCTGCC -1.22618210984  
CTCCTGGA -0.151832119985  
CTCCTGGC -0.778328796672  
CTCCTGTA 0.0310855540509  
CTCCTGTC -1.12535505503  
CTCCTTAA -0.49325443499  
CTCCTTAC 0.124459212235  
CTCCTTCA -1.27439696539  
CTCCTTCC -1.30438771139  
CTCCTTGA -0.103469458061  
CTCCTTGC -1.01623606264  
CTCCTTTA -0.737677047554  
CTCCTTTC -0.741086170343  
CTCGAAAA 0.663579005962  
CTCGAAAC -0.199940596581  
CTCGAAAG -0.994219158251  
CTCGAACA -0.0824351537971  
CTCGAACC -0.737008796201  
CTCGAAGA -0.847100604351  
CTCGAAGC 0.0762345723194  
CTCGAATA 1.31254641505  
CTCGAATC 2.05373584168  
CTCGACAA -1.02737379336  
CTCGACAC -0.788064032267  
CTCGACAG -0.45008414853  
CTCGACCA -0.984159164989  
CTCGACCC -1.18370255796  
CTCGACGA -0.419005672531  
CTCGACGC -0.329997923186  
CTCGACTA 0.285219253564  
CTCGACTC -0.577603785419  
CTCGAGAA 0.268336851163  
CTCGAGAC -0.820808348555  
CTCGAGAG -0.926586292364  
CTCGAGCA -0.430645112216



CTCGAGCC -1.16765036939  
CTCGAGGA -0.310778098296  
CTCGAGGC 0.323006473518  
CTCGAGTA 0.54146096342  
CTCGAGTC 0.402463849325  
CTCGATAA 0.237129929343  
CTCGATAC 0.845274675187  
CTCGATCA -0.524785489942  
CTCGATCC 0.297564624818  
CTCGATGA -1.09630090182  
CTCGATGC -0.399724643312  
CTCGATTA 2.10218385658  
CTCGATTC 3.18516532233  
CTCGCAA 0.0467655203727  
CTCGCAAC -0.969668103176  
CTCGCAAG -1.16762309807  
CTCGCACA 0.484566126513  
CTCGCACC -0.596671640375  
CTCGCAGA -0.883215946855  
CTCGCAGC -0.432102149978  
CTCGCATA 1.18289316193  
CTCGCATC -0.477014261692  
CTCGCCAA -0.325194007853  
CTCGCCAC -0.736220217969  
CTCGCCAG 0.585560140077  
CTCGCCCA -0.484648773176  
CTCGCCCC -1.10231495582  
CTCGCCGA -0.209324427727  
CTCGCCGC -1.02063298999  
CTCGCCTA -0.550848125414  
CTCGCCTC -0.846879311146  
CTCGCGAA 0.570168083917  
CTCGCGAC -0.571225628114  
CTCGCGAG 0.440138861341  
CTCGCGCA -0.85975949166  
CTCGCGCC -0.946812449665  
CTCGCGGA 0.340249648379  
CTCGCGGC -0.807587380669  
CTCGCGTA 0.231906535358  
CTCGCGTC 0.224335934518  
CTCGCTAA 0.723354818093  
CTCGCTAC -0.903753538431  
CTCGCTCA -0.490597667462  
CTCGCTCC -0.612591011387  
CTCGCTGA -0.625318805611  
CTCGCTGC -0.456584298138  
CTCGCTTA 0.342341212659  
CTCGCTTC -0.017371204325  
CTCGGAAA 0.614858694248  
CTCGGAAC -0.958774981592  
CTCGGAAG 0.399417788953  
CTCGGACA -1.18685853631  
CTCGGACC -1.09947748979  
CTCGGAGA 0.176116915408

CTCGGAGC -0.798492500575  
CTCGGATA 2.1230010312  
CTCGGATC 3.34974792794  
CTCGGCAA -0.116404389387  
CTCGGCAC -1.49859383701  
CTCGGCAG -0.646495503621  
CTCGGCCA -0.689628318042  
CTCGGCCC -0.974845281648  
CTCGGCGA 0.0634447410539  
CTCGGCGC -0.323878947481  
CTCGGCTA -0.549752484644  
CTCGGCTC -0.713711597169  
CTCGGGAA 0.00311933902505  
CTCGGGAC -1.60211492322  
CTCGGGCA -1.74307765391  
CTCGGGCC -1.57647988534  
CTCGGGGA -0.725277966379  
CTCGGGGC -1.43798114936  
CTCGGGTA 0.356878281808  
CTCGGGTC 0.687541333676  
CTCGGTAA 0.285230911532  
CTCGGTAC -1.21269550684  
CTCGGTCA -1.1637484893  
CTCGGTCC -0.461168377511  
CTCGGTGA -0.484674170891  
CTCGGTGC -0.645195223886  
CTCGGTTA 0.158174054319  
CTCGGTTC -0.904636629471  
CTCGTAAA -0.289058055728  
CTCGTAAC -0.11951456858  
CTCGTAAG -0.0598353510368  
CTCGTACA -1.13147965154  
CTCGTACC -0.978932440155  
CTCGTAGA 0.207874884372  
CTCGTAGC -0.184513150163  
CTCGTATA 1.53268298313  
CTCGTATC 0.936891727478  
CTCGTCAA 0.279981078941  
CTCGTCAC -1.30815719028  
CTCGTCAG -0.09936502078  
CTCGTCCA -0.622492581198  
CTCGTCCC -1.17345229001  
CTCGTCGA 0.04796400107  
CTCGTCGC 0.386402500922  
CTCGTCTA 0.88142644884  
CTCGTCTC -0.779166088554  
CTCGTGAA -0.505037101132  
CTCGTGAC -0.971819206363  
CTCGTGCA -0.276508253687  
CTCGTGCC -1.27125680857  
CTCGTGGA -0.373355569837  
CTCGTGGC -0.304471970577  
CTCGTGTA 1.23722158056  
CTCGTGTC 1.18750388809

CTCGTTAA 0.200304699888  
CTCGTTAC 0.939472301861  
CTCGTTCA 0.823457621675  
CTCGTTCC 0.339622824446  
CTCGTTGA -0.511852432219  
CTCGTTGC -0.0855422103206  
CTCGTTTA 0.27712570961  
CTCGTTTC -0.438742403374  
CTCTAAAA -0.847002760695  
CTCTAAAC -0.211137866211  
CTCTAAAG -0.483949295124  
CTCTAACA -0.80927778596  
CTCTAACC -0.965715219473  
CTCTAAGA -0.660798997063  
CTCTAAGC -0.592447708927  
CTCTAATA 1.43067951448  
CTCTAATC 0.632020471514  
CTCTACAA -0.804221558902  
CTCTACAC -0.283191599927  
CTCTACAG -0.223437854663  
CTCTACCA -0.443684757071  
CTCTACCC -0.881443727613  
CTCTACGA -0.261071855615  
CTCTACGC -0.374132073746  
CTCTACTA 2.14792285128  
CTCTACTC -0.461998591342  
CTCTAGAA -0.0545451319161  
CTCTAGAC -0.659728129474  
CTCTAGAG -0.644154750284  
CTCTAGCA -1.06733355883  
CTCTAGCC -0.970715238474  
CTCTAGGA 0.586558769902  
CTCTAGGC -0.399011841869  
CTCTAGTA 1.4893846672  
CTCTAGTC -0.661898801392  
CTCTATAA 0.242284208236  
CTCTATAC -0.380367004592  
CTCTATCA -0.0944237079731  
CTCTATCC 0.660172797664  
CTCTATGA -0.654865507948  
CTCTATGC -0.436694972827  
CTCTATTA 0.966424065535  
CTCTATTC -0.813533776819  
CTCTCAAA -0.151880417279  
CTCTCAAC -1.27982874555  
CTCTCAAG -0.513051329272  
CTCTCACA -1.03375944507  
CTCTCACC -0.244090152312  
CTCTCAGA -1.24225011994  
CTCTCAGC -0.49217232579  
CTCTCATA 0.581762973511  
CTCTCATC -0.827826028649  
CTCTCCAA -0.809662498888  
CTCTCCAC -1.05369123869

CTCTCCAG 0.375585156126  
CTCTCCCA -1.51718662979  
CTCTCCCC -0.396216844155  
CTCTCCGA -0.667713212695  
CTCTCCGC -1.54704643183  
CTCTCCTA -0.585808912777  
CTCTCCTC -1.00226711123  
CTCTCGAA -0.42970456405  
CTCTCGAC -1.12178792515  
CTCTCGCA -0.93792387396  
CTCTCGCC -1.30805976298  
CTCTCGGA 0.522401851939  
CTCTCGGC 1.04905178397  
CTCTCGTA 3.93289195424  
CTCTCGTC -0.343657313922  
CTCTCTAA -0.738647573351  
CTCTCTAC -0.327964648743  
CTCTCTCA -1.15127383951  
CTCTCTCC -0.692308401504  
CTCTCTGA -1.09093761223  
CTCTCTGC -0.902060218648  
CTCTCTTA -0.440786086717  
CTCTCTTC -0.914102899102  
CTCTGAAA 0.753959480983  
CTCTGAAC -0.646279414866  
CTCTGAAG -0.567841694862  
CTCTGACA -1.1017428827  
CTCTGACC -1.32605258679  
CTCTGAGA -0.0339925515246  
CTCTGAGC 0.461387797114  
CTCTGATA 1.15539722099  
CTCTGATC 0.249174483399  
CTCTGCAA 0.530428154403  
CTCTGCAC -0.755339701067  
CTCTGCAG -1.1127067848  
CTCTGCCA -0.982018887058  
CTCTGCCC -0.392289982701  
CTCTGCGA -0.539436016096  
CTCTGCGC -0.399628256902  
CTCTGCTA 0.818988664731  
CTCTGCTC -1.05079173563  
CTCTGGAA -0.243993765902  
CTCTGGAC -1.82953126748  
CTCTGGCA -1.24532719884  
CTCTGGCC -0.989701904013  
CTCTGGGA -0.305347567209  
CTCTGGGC -1.14106062725  
CTCTGGTA 0.152051955944  
CTCTGGTC 0.106313585781  
CTCTGTAA 0.366053934962  
CTCTGTAC -0.734868726448  
CTCTGTCA -1.0871533527  
CTCTGTCC -0.61103696268  
CTCTGTGA -0.399792301159

CTCTGTGC -1.72917969119  
CTCTGTTA -0.159219524192  
CTCTGTTC -0.764744350012  
CTCTTAAA 0.481658504505  
CTCTTAAC 0.0274828257295  
CTCTTAAG -0.190720601514  
CTCTTACA 0.399602651009  
CTCTTACC -0.82899619714  
CTCTTAGA -0.0703633284244  
CTCTTAGC 0.295008199082  
CTCTTATA 0.353158973811  
CTCTTATC 0.0988387468175  
CTCTTCAA -0.382297230929  
CTCTTCAC -1.05636549317  
CTCTTCAG -0.86963732918  
CTCTTCCA -0.270090542564  
CTCTTCCC -0.768083108641  
CTCTTCGA 0.486761363434  
CTCTTCGC 0.215151954244  
CTCTTCTA 1.61929335472  
CTCTTCTC -0.706941440707  
CTCTTGAA -0.607318487395  
CTCTTGAC -0.214848847088  
CTCTTGCA -0.0756389750856  
CTCTTGCC -1.17075263782  
CTCTTGGA -0.511803302213  
CTCTTGGC -0.366680134361  
CTCTTGTA 2.59776259885  
CTCTTGTC 0.243781007995  
CTCTTTAA -0.329925060889  
CTCTTTAC 0.726056760245  
CTCTTTCA 0.0717558310097  
CTCTTTCC -0.507309780266  
CTCTTTGA 0.22314682183  
CTCTTTGC -0.197896496882  
CTCTTTTA 0.146082035681  
CTCTTTTC 0.226799929226  
CTGAAAAA 1.22531359126  
CTGAAAAC 0.486273810578  
CTGAAAAG 0.016217481896  
CTGAAACA -0.057078449895  
CTGAAACC -0.48470019314  
CTGAAAGA -0.529543606117  
CTGAAAGC -0.341273675919  
CTGAAATA 1.17784318021  
CTGAAATC 6.83198928133  
CTGAACAA 0.308713805332  
CTGAACAC 0.524048123496  
CTGAACAG -0.0820729240918  
CTGAACCA -0.780957251993  
CTGAACCC -0.895547162005  
CTGAACGA 1.56680169051  
CTGAACGC -0.11012907201  
CTGAACTA 1.30340989936

CTGAACTC -0.989407540333  
CTGAAGAA 0.706928741849  
CTGAAGAC 0.475179172697  
CTGAAGCA -0.701278791159  
CTGAAGCC -1.05388942414  
CTGAAGGA -0.396021573199  
CTGAAGGC -0.685443524056  
CTGAAGTA -0.0551588406351  
CTGAAGTC -1.05369123869  
CTGAATAA 0.229701097716  
CTGAATAC 0.738053433363  
CTGAATCA 0.00963281202396  
CTGAATCC 1.92726396462  
CTGAATGA 0.348789734125  
CTGAATGC -0.415007406026  
CTGAATTA 2.21160553978  
CTGAATTC 0.661803872228  
CTGACAAA 1.11677562364  
CTGACAAC 0.288275931014  
CTGACAAG -0.475453759468  
CTGACACA 0.0975034931798  
CTGACACC 0.532919836783  
CTGACAGA -0.0958438982313  
CTGACAGC -1.11628848714  
CTGACATA 0.375679044401  
CTGACATC -0.304220699741  
CTGACCAA -0.088628865401  
CTGACCAC -0.339958407368  
CTGACCAG -0.218598549071  
CTGACCCA -1.31055373532  
CTGACCCC -1.04815932492  
CTGACCGA -0.675287977095  
CTGACCGC -1.18628375688  
CTGACCTA -0.662969877158  
CTGACCTC -1.09093761223  
CTGACGAA 0.717128422544  
CTGACGAC -0.367681054144  
CTGACGCA -1.05715490412  
CTGACGCC -0.747746825182  
CTGACGGA 0.256287092658  
CTGACGGC -0.814171634185  
CTGACGTA 0.404652216371  
CTGACGTC -0.310800581519  
CTGACTAA -0.213579377696  
CTGACTAC 0.070003180499  
CTGACTCA -0.563790967503  
CTGACTCC -0.676935289542  
CTGACTGA 0.655520019554  
CTGACTGC 0.222990271981  
CTGACTTA 1.67264312861  
CTGACTTC -0.99321282584  
CTGAGAAA 1.24343839992  
CTGAGAAC 0.105940114464  
CTGAGAAG -0.145448966409

CTGAGACA -0.980491276956  
CTGAGACC -0.479617943833  
CTGAGAGA 0.147863206576  
CTGAGAGC -1.03356209234  
CTGAGATA 1.02750286371  
CTGAGATC 2.45840804314  
CTGAGCAA -0.135119382647  
CTGAGCAC -0.669490636387  
CTGAGCAG -0.436343984734  
CTGAGCCA -0.806790475317  
CTGAGCCC -1.05127096136  
CTGAGCGA -0.441676880343  
CTGAGCGC -0.674503770601  
CTGAGCTA 0.843254724135  
CTGAGCTC -0.273129733062  
CTGAGGAA 1.47036344412  
CTGAGGAC -0.687651043478  
CTGAGGCA -1.00925731183  
CTGAGGCC -1.27216779546  
CTGAGGGA 0.334963800996  
CTGAGGGC -0.888273006625  
CTGAGGTA -0.0628435230144  
CTGAGGTC -1.43023630354  
CTGAGTAA 0.132456994313  
CTGAGTAC -0.856082027439  
CTGAGTCA -1.16335315929  
CTGAGTCC -0.381096668452  
CTGAGTGA -0.859293381137  
CTGAGTGC -0.707273484603  
CTGAGTTA 0.876172869046  
CTGAGTTC -0.424847146974  
CTGATAAA 1.45113216944  
CTGATAAC 2.43720469835  
CTGATAAG 0.497072627532  
CTGATACA 1.36989362274  
CTGATACC 1.52989048355  
CTGATAGA 0.450449709084  
CTGATAGC -0.311967210984  
CTGATATA 3.89531291228  
CTGATATC 7.50621763245  
CTGATCAA -0.117075138875  
CTGATCAC 0.329206014106  
CTGATCAG -0.0655977178423  
CTGATCCA -0.44219336994  
CTGATCCC -0.244583325974  
CTGATCGA -1.19927239813  
CTGATCGC 2.69737306148  
CTGATCTA 0.440009374631  
CTGATCTC 2.3923477538  
CTGATGAA 1.06953858012  
CTGATGAC -0.449407986414  
CTGATGCA -0.17898061186  
CTGATGCC 0.12601346912  
CTGATGGA -0.0921358318463

CTGATGGC -0.530705239309  
CTGATGTA -0.413351350103  
CTGATGTC -0.305497455363  
CTGATTAA 1.57514879526  
CTGATTAC 6.81913220858  
CTGATTCA 0.0726432937876  
CTGATTCC 7.12611459755  
CTGATTGA -0.0571871188066  
CTGATTGC 6.29782308292  
CTGATTTA 2.49172422437  
CTGATTTT 5.83790044251  
CTGCAAAA -0.903971917144  
CTGCAAAC 0.762547655846  
CTGCAAAG -0.808117818191  
CTGCAACA 0.276673130656  
CTGCAACC -0.147902552217  
CTGCAAGA -0.0591346239173  
CTGCAAGC -0.727272311537  
CTGCAATA 1.0355601847  
CTGCAATC 3.66451700651  
CTGCACAA -0.0295737654764  
CTGCACAC 0.911423231995  
CTGCACAG -0.601567778557  
CTGCACCA -0.714702940765  
CTGCACCC -0.499252875637  
CTGCACGA 0.319003002563  
CTGCACGC -0.205912806802  
CTGCACTA 0.465366911245  
CTGCACTC -0.927198543837  
CTGCAGAA 1.56055426899  
CTGCAGAC 0.560639360889  
CTGCAGCA -0.281170191629  
CTGCAGCC -0.283746186096  
CTGCAGGA -0.0475628420803  
CTGCAGGC -0.903753538431  
CTGCAGTA 0.423542495501  
CTGCAGTC -1.59972379081  
CTGCATAA -0.0661187873551  
CTGCATAC 0.694974953398  
CTGCATCA -0.562715103643  
CTGCATCC -0.398148944094  
CTGCATGA -0.686267700724  
CTGCATGC 0.426324378001  
CTGCATTA 0.18439219875  
CTGCATTC 0.551133745618  
CTGCCAAA -0.123185162927  
CTGCCAAC -0.660247741741  
CTGCCAAG -0.650123837835  
CTGCCACA -1.05128178662  
CTGCCACC -0.826185586076  
CTGCCAGA -0.536164498959  
CTGCCAGC -0.667247726706  
CTGCCATA -0.438969733741  
CTGCCATC 0.0557812928298



CTGCCCAA -0.538294992524  
CTGCCCAC -0.139165321912  
CTGCCCAG -0.885864387263  
CTGCCCCA -1.18023139813  
CTGCCCCC -1.50271701031  
CTGCCCGA 0.755270169618  
CTGCCCGC -1.31774545221  
CTGCCCTA -0.688408186833  
CTGCCCTC -1.63284241112  
CTGCCGAA 0.602213963043  
CTGCCGAC -0.0522851516401  
CTGCCGCA -0.918096585691  
CTGCCGCC -1.0543751034  
CTGCCGGA 1.14455635208  
CTGCCGGC -0.84078219413  
CTGCCGTA -0.517353119289  
CTGCCGTC -1.28357928024  
CTGCCTAA -0.402179894544  
CTGCCTAC 0.187985142705  
CTGCCTCA -0.640360914567  
CTGCCTCC -0.698352224954  
CTGCCTGA -0.298273262701  
CTGCCTGC -0.833879428287  
CTGCCTTA 0.316775289876  
CTGCCTTC -0.804329186923  
CTGCGAAA 1.21967529854  
CTGCGAAC -0.0386141029365  
CTGCGAAG -0.403799935674  
CTGCGACA -0.754543628428  
CTGCGACC -0.560576491136  
CTGCGAGA -0.633641137178  
CTGCGAGC -1.10141021427  
CTGCGATA 0.497795213341  
CTGCGATC 2.89767068331  
CTGCGCAA -0.450303776312  
CTGCGCAC -0.3197205921  
CTGCGCAG -0.423287061105  
CTGCGCCA -0.209586107462  
CTGCGCCC 0.663746172889  
CTGCGCGA 0.296529147488  
CTGCGCGC -0.760516671361  
CTGCGCTA -0.170100363275  
CTGCGCTC -0.202663148354  
CTGCGGAA 0.0842623320287  
CTGCGGAC -0.072952646283  
CTGCGGCA -0.41037794385  
CTGCGGCC -1.31624657068  
CTGCGGGA 0.34301383575  
CTGCGGGC -1.38839564991  
CTGCGGTA 0.984124399264  
CTGCGGTC -1.05230935319  
CTGCGTAA 1.14791343037  
CTGCGTAC -0.0628435230144  
CTGCGTCA -0.875788572473

CTGCGTCC -0.308716719824  
CTGCGTGA -0.479031714608  
CTGCGTGC -0.928840651834  
CTGCGTTA -0.664818497723  
CTGCGTTC -0.642596954374  
CTGCTAAA 0.168293794665  
CTGCTAAC 0.443493233319  
CTGCTAAG -1.156034662  
CTGCTACA -0.325078677246  
CTGCTACC -0.964429512198  
CTGCTAGA -1.10370308667  
CTGCTAGC -0.465985616235  
CTGCTATA 1.21356360907  
CTGCTATC 0.13633285216  
CTGCTCAA -0.930581852555  
CTGCTCAC 0.891293044748  
CTGCTCCA -0.521868083569  
CTGCTCCC -1.50271367947  
CTGCTCGA -0.403799935674  
CTGCTCGC -0.636277919619  
CTGCTCTA -1.17571518478  
CTGCTCTC -1.03356209234  
CTGCTGAA 1.02582286732  
CTGCTGAC 0.574046856255  
CTGCTGCA -0.679005827846  
CTGCTGCC -0.849500896593  
CTGCTGGA -0.19569210013  
CTGCTGGC -1.03605439925  
CTGCTGTA 0.107119650964  
CTGCTGTC -1.09823508354  
CTGCTTAA 0.106218656617  
CTGCTTAC -0.108821297867  
CTGCTTCA -0.522979337688  
CTGCTTCC -0.534752635821  
CTGCTTGA 0.526737158613  
CTGCTTGC 0.234607852976  
CTGCTTTA 0.678792029049  
CTGCTTTC -1.05058647213  
CTGGAAAA -0.569278123004  
CTGGAAAC 0.695344052977  
CTGGAAAG -0.678435003793  
CTGGAAACA 1.15313682436  
CTGGAAACC -0.360741648975  
CTGGAAGA -0.435866216243  
CTGGAAGC -0.281116065351  
CTGGAATA 1.05455143015  
CTGGAATC 3.84497422486  
CTGGACAA -0.190636289427  
CTGGACAC 0.480453986646  
CTGGACAG -0.299021038046  
CTGGACCA -0.456584298138  
CTGGACCC -0.767573905273  
CTGGACGA -0.0847652900562  
CTGGACGC -0.946581163916

CTGGACTA -0.0992043073706  
CTGGACTC -0.497265400352  
CTGGAGAA 0.816224269181  
CTGGAGAC -0.433923291048  
CTGGAGCA -0.258818537035  
CTGGAGCC -1.19410021593  
CTGGAGGA -0.855877180296  
CTGGAGGC -0.324885904426  
CTGGAGTA -0.0533814169435  
CTGGAGTC -0.820801895037  
CTGGATAA 0.755608250676  
CTGGATAC 3.56738448651  
CTGGATCA 0.0662147574092  
CTGGATCC 3.96956542194  
CTGGATGA -0.2043851967  
CTGGATGC 0.0222585990321  
CTGGATTA 3.57315663768  
CTGGATTC 10.835910109  
CTGGCAAA 1.37289346759  
CTGGCAAC -0.117056611034  
CTGGCAAG -1.11390006105  
CTGGCACA -0.7605229167  
CTGGCACC -0.97665372386  
CTGGCAGA 0.190297167479  
CTGGCAGC -0.79075244285  
CTGGCATA 0.177488183839  
CTGGCATC -0.568859268885  
CTGGCCAA -1.11582362569  
CTGGCCAC -0.705409042511  
CTGGCCAG -0.952862518454  
CTGGCCCA -1.47329542295  
CTGGCCCC -0.842833163702  
CTGGCCGA -0.791858908875  
CTGGCCGC -1.38817956116  
CTGGCCTA -0.819333615663  
CTGGCCTC -1.00462410245  
CTGGCGAA 0.213981577575  
CTGGCGAC 0.0984554911351  
CTGGCGCA -0.187756563271  
CTGGCGCC -0.695041362177  
CTGGCGGA 0.698311838424  
CTGGCGGC -1.17075263782  
CTGGCGTA 0.528247489941  
CTGGCGTC -1.04476040286  
CTGGCTAA -0.550633285726  
CTGGCTAC -0.931018609981  
CTGGCTCA -1.41196597847  
CTGGCTCC 0.160283105551  
CTGGCTGA -1.03652800418  
CTGGCTGC -1.31151759942  
CTGGCTTA 0.80539193557  
CTGGCTTC -0.454669060616  
CTGGGAAA 0.0984044875271  
CTGGGAAC -1.10065494451

CTGGGAAG -0.0426510905482  
CTGGGACA -0.715438641787  
CTGGGACC -0.267445016648  
CTGGGAGA -0.691673874986  
CTGGGAGC -0.953309060246  
CTGGGATA 0.972863635346  
CTGGGATC 0.488119724829  
CTGGGCAA -1.0701252257  
CTGGGCAC -0.939083841729  
CTGGGCCA -1.10414983664  
CTGGGCCC -0.927433576789  
CTGGGCGA -0.0658312935488  
CTGGGCGC -1.11926251793  
CTGGGCTA -1.15362895713  
CTGGGCTC -1.51202256654  
CTGGGGAA -0.0871391436936  
CTGGGGAC -1.60431765455  
CTGGGGCA -0.197428929113  
CTGGGGCC -0.426796317508  
CTGGGGGA -0.698479838063  
CTGGGGGC -1.64216212345  
CTGGGGTA 0.0345912714282  
CTGGGGTC -1.06283941235  
CTGGGTAA -0.043588724222  
CTGGGTAC -0.851322037663  
CTGGGTCA -0.84613778114  
CTGGGTCC -1.02154564231  
CTGGGTGA 0.0726432937876  
CTGGGTGC -1.13131623182  
CTGGGTTA -0.251803355076  
CTGGGTTC -0.468319083342  
CTGGTAAA 0.586840018369  
CTGGTAAC 1.02900819877  
CTGGTAAG -0.54469792301  
CTGGTACA -0.490393444852  
CTGGTACC -0.50891899614  
CTGGTAGA -0.317183735095  
CTGGTAGC -1.38942404919  
CTGGTATA 0.267585328614  
CTGGTATC 0.612687814153  
CTGGTCAA -0.614939467309  
CTGGTCAC -1.03268337303  
CTGGTCCA -0.065751977734  
CTGGTCCC -0.821559454748  
CTGGTCGA -0.158123050711  
CTGGTCGC -1.09134147753  
CTGGTCTA -0.227363258871  
CTGGTCTC -0.816395599668  
CTGGTGAA 0.709522431446  
CTGGTGAC -1.16739701678  
CTGGTGCA -0.535071772682  
CTGGTGCC -1.17329282567  
CTGGTGGA -0.979366907624  
CTGGTGGC -1.12478985178

CTGGTGTA 1.14765695508  
CTGGTGTC -0.936488694887  
CTGGTTAA -0.39878576057  
CTGGTTAC 1.2855140865  
CTGGTTCA -0.99509413035  
CTGGTTCC 0.226512643597  
CTGGTTGA -0.845854450893  
CTGGTTGC -0.223862537765  
CTGGTTTA 0.733175406665  
CTGGTTTC -0.229554124054  
CTGTAAAA 0.310154605211  
CTGTAAAC -0.0972416052665  
CTGTAAAG 0.338682068102  
CTGTAACA 1.02946223497  
CTGTAACC 1.62473179657  
CTGTAAGA -0.291990242739  
CTGTAAGC -0.488638712561  
CTGTAATA 1.28162344801  
CTGTAATC 6.40949641927  
CTGTACAA -0.480645926755  
CTGTACAC -0.484416030181  
CTGTACAG -0.378470919445  
CTGTACCA -0.878061043429  
CTGTACCC -0.87773337127  
CTGTACGA -0.30536297238  
CTGTACGC 0.617572918902  
CTGTACTA 1.06282171722  
CTGTACTC -0.539688119644  
CTGTAGAA 1.01421569523  
CTGTAGAC 0.101358949583  
CTGTAGCA 0.158961591661  
CTGTAGCC 0.22782041774  
CTGTAGGA 0.882333688527  
CTGTAGGC -0.446568646788  
CTGTAGTA 2.15292765837  
CTGTAGTC -0.819295310912  
CTGTATAA 1.00726255031  
CTGTATAC 0.797027760227  
CTGTATCA 0.830929962503  
CTGTATCC 2.28327601781  
CTGTATGA -0.497035780028  
CTGTATGC 0.107443992275  
CTGTATTA 3.26429794047  
CTGTATTC 1.05930663184  
CTGTCAA -0.0671763315521  
CTGTCAAC -0.126983370382  
CTGTCAAG -0.20881834703  
CTGTCACA -0.438195103434  
CTGTCACC 0.176720631584  
CTGTCAGA -0.640691293039  
CTGTCAGC -0.766723081822  
CTGTCATA 0.933617712206  
CTGTCATC -0.187671210294  
CTGTCAA -0.268853548938

CTGTCCAC 0.242842541609  
CTGTCCCA -0.25003779753  
CTGTCCCC -0.315223114771  
CTGTCCGA -0.613753269113  
CTGTCCGC -0.366370781865  
CTGTCCTA 0.0414703049802  
CTGTCCTC -0.751663277737  
CTGT CGAA 1.5089080156  
CTGT CGAC -0.667893286658  
CTGT CGCA 0.0291848889882  
CTGT CGCC -0.672703030974  
CTGT CGGA 0.558903364618  
CTGT CGGC -0.332440267382  
CTGT CGTA 0.014939269028  
CTGT CGTC -1.43098990787  
CTGTCTAA 0.0433974086478  
CTGTCTAC 0.124245621615  
CTGTCTCA -0.0350192853788  
CTGTCTCC -0.922308859172  
CTGTCTGA 0.140476635081  
CTGTCTGC -0.726970869806  
CTGTCTTA 2.77123607012  
CTGTCTTC 0.597481244584  
CTGTGAAA 1.5270163782  
CTGTGAAC -0.248820164458  
CTGTGAAG -0.709971055018  
CTGTGACA -0.535972142495  
CTGTGACC -0.854496543856  
CTGTGAGA 0.34488993581  
CTGTGAGC -0.764844899982  
CTGTGATA 3.11514215674  
CTGTGATC 0.361704472185  
CTGTGCAA -0.0795889442969  
CTGTGCAC -0.335825866059  
CTGTGCCA 0.00256121382976  
CTGTGCCC -0.272487920314  
CTGTGCGA 0.759314443459  
CTGTGCGC 0.0443818823697  
CTGTGCTA -0.311676178151  
CTGTGCTC -0.93385357787  
CTGTGGAA -0.0462384136982  
CTGTGGAC -0.638517914808  
CTGTGGCA -0.6120091539  
CTGTGGCC -0.510145580866  
CTGTGGGA -1.25379171597  
CTGTGGGC -1.09300815053  
CTGTGGTA 1.50676981945  
CTGTGGTC -0.0975047422478  
CTGTGTAA 0.754496580202  
CTGTGTAC -0.128376289323  
CTGTGTCA -0.655388659241  
CTGTGTCC 0.287297286276  
CTGTGTGA 0.84427833532  
CTGTGTGC -0.0808313505503

CTGTGTTA -0.0650874735851  
CTGTGTTC 0.296653637927  
CTGTTAAA 0.891135037653  
CTGTTAAC 0.821204511273  
CTGTTAAG 0.308347412067  
CTGTTACA 0.244586240466  
CTGTTACC -0.70160937781  
CTGTTAGA -0.159219524192  
CTGTTAGC 0.318554587169  
CTGTTATA 3.93857292345  
CTGTTATC 1.56297246454  
CTGTTCAA -0.720092668966  
CTGTTCAC -0.623619656844  
CTGTTCCA 0.475555974862  
CTGTTCCC -0.369068768636  
CTGTTCGA 0.430232711614  
CTGTTCGC 0.161916261894  
CTGTTCTA 2.08475810962  
CTGTTCTC 0.0633429420161  
CTGTTGAA 0.2808062965  
CTGTTGAC 0.175516738259  
CTGTTGCA -0.0789356817595  
CTGTTGCC -0.980489611532  
CTGTTGGA -0.528503757049  
CTGTTGGC -1.29179190201  
CTGTTGTA 2.09002501281  
CTGTTGTC 0.298273262701  
CTGTTTAA -0.462431601564  
CTGTTTAC 0.18565459009  
CTGTTTCA -0.334829526191  
CTGTTTCC 0.317230991499  
CTGTTTGA 0.298443135942  
CTGTTTGC 0.0981742426685  
CTGTTTTA 1.33240493002  
CTGTTTTTC -0.252370015569  
CTTAAAAA 0.50902683234  
CTTAAAAC -0.352923732681  
CTTAAAAG 0.621517475485  
CTTAAACA -0.333101024327  
CTTAAACC 1.8079323845  
CTTAAAGA -0.491972058562  
CTTAAAGC -0.592912154026  
CTTAAATA 0.125516548254  
CTTAAATC 1.29032882709  
CTTAACAA 0.778403740749  
CTTAAACAC -0.0322043025773  
CTTAAACCA -0.595174840616  
CTTAAACC 0.370954236705  
CTTAAACGA 0.465111476849  
CTTAAACGC -0.0833748692508  
CTTAAACTA 1.14576732346  
CTTAAACTC -1.13069835954  
CTTAAAGAA 0.0480100084061  
CTTAAAGAC -0.29617649397

CTTAAGCA 0.803057219395  
CTTAAGCC -0.836259319086  
CTTAAGGA 0.621041580597  
CTTAAGGC -0.265668425668  
CTTAAGTA -0.463592402045  
CTTAAGTC -0.55448561946  
CTTAATAA 0.633304513366  
CTTAATAC 1.41140348153  
CTTAATCA 1.27611922192  
CTTAATCC -0.0532569265046  
CTTAATGA 0.353158973811  
CTTAATGC 0.937929911122  
CTTAATTA 1.76697836094  
CTTAATTC 0.298617172743  
CTTACAAA 1.01456168705  
CTTACAAC 0.567027302559  
CTTACAAG 1.29529637032  
CTTACACA 0.215111359535  
CTTACACC 1.61115526068  
CTTACAGA -0.0820113034063  
CTTACAGC -1.04555793274  
CTTACATA 0.232074534997  
CTTACATC 0.30782571802  
CTTACCAA 1.58596530735  
CTTACCAC -0.658581485097  
CTTACCCA -1.03400009883  
CTTACCCC -0.220684076191  
CTTACCGA -0.451537647267  
CTTACCGC -0.609185843979  
CTTACCTA 1.67880228267  
CTTACCTC -0.873982836575  
CTTACGAA 1.09910172852  
CTTACGAC -0.480573064458  
CTTACGCA 0.180299835792  
CTTACGCC 0.273396825425  
CTTACGGA 0.899378469761  
CTTACGGC -0.138783523476  
CTTACGTA 0.099267801658  
CTTACGTC -0.498761991933  
CTTACTAA -0.652458762188  
CTTACTAC -0.371885000505  
CTTACTCA 0.173460772414  
CTTACTCC -0.20365345106  
CTTACTGA 0.653749257558  
CTTACTGC -0.2067007605  
CTTACTTA 0.480761257362  
CTTACTTC -0.234651153998  
CTTAGAAA 1.33079862864  
CTTAGAAC -1.20342284274  
CTTAGAAG -0.345132046814  
CTTAGACA 0.0845829261356  
CTTAGACC -0.833888588118  
CTTAGAGA -0.479738270712  
CTTAGAGC -1.00794953768



CTTAGATA 3.16193869563  
CTTAGATC 0.91026597054  
CTTAGCAA 0.900759106201  
CTTAGCAC -0.904970130614  
CTTAGCCA -0.705909294225  
CTTAGCCC 0.00342327889268  
CTTAGCGA 1.29343983899  
CTTAGCGC -0.489520138178  
CTTAGCTA -0.299869155184  
CTTAGCTC 0.138133591786  
CTTAGGAA 0.639920826293  
CTTAGGAC -0.784993823248  
CTTAGGCA 0.505153888985  
CTTAGGCC -0.526961782666  
CTTAGGGA -0.943345661572  
CTTAGGGC -1.09358480357  
CTTAGGTA -0.145448758231  
CTTAGGTC -0.106185764494  
CTTAGTAA -0.265765436612  
CTTAGTAC 0.778973732089  
CTTAGTCA 0.014276013947  
CTTAGTCC -0.169122551249  
CTTAGTGA -0.394711717276  
CTTAGTGC -0.289016003774  
CTTAGTTA -0.200472283171  
CTTAGTTC -0.37102002095  
CTTATAAA 1.43382674936  
CTTATAAC 1.57761362268  
CTTATAAG 0.963185024164  
CTTATACA 0.187873559302  
CTTATACC 0.334132754453  
CTTATAGA 0.0603528815238  
CTTATAGC 2.18984927424  
CTTATATA 0.844535226961  
CTTATATC 1.09738155377  
CTTATCAA 0.0979310907744  
CTTATCAC -0.0254347706489  
CTTATCCA 0.913149027545  
CTTATCCC 0.530725224397  
CTTATCGA 1.39826911569  
CTTATCGC 0.0403844485764  
CTTATCTA 1.19785491418  
CTTATCTC -0.354040399427  
CTTATGAA 0.453431650634  
CTTATGAC 0.36061986485  
CTTATGCA 0.492859729518  
CTTATGCC 0.581309978202  
CTTATGGA -0.410165185943  
CTTATGGC -0.641126801397  
CTTATGTA 0.403904441026  
CTTATGTC -0.347054362388  
CTTATTAA 0.116700418491  
CTTATTAC 1.83162949345  
CTTATTCA 0.636067451669

CTTATTCC 0.527335253983  
CTTATTGA 1.34909684956  
CTTATTGC 1.19944414497  
CTTATTTA 1.66615317972  
CTTATTTT 1.21300569205  
CTTCAAAA 0.433457805059  
CTTCAAAC 0.261918515506  
CTTCAAAG 0.562642241346  
CTTCAACA 0.164706055159  
CTTCAACC 0.396266390517  
CTTCAAGA -1.21364230035  
CTTCAAGC -0.87773337127  
CTTCAATA 0.648543558702  
CTTCAATC -1.26598324369  
CTTCACAA 0.906074306681  
CTTCACAC -0.55785622932  
CTTCACCA -0.481604794584  
CTTCACCC -0.819295310912  
CTTCACGA 0.090274304246  
CTTCACGC -0.591006076335  
CTTCACTA -0.178759318655  
CTTCACTC -1.05636549317  
CTTCAGAA 1.08888747536  
CTTCAGAC -0.195991876438  
CTTCAGCA 0.0453224305355  
CTTCAGCC -1.19064029771  
CTTCAGGA 0.0921133486232  
CTTCAGGC -0.863612658105  
CTTCAGTA -0.622567525275  
CTTCAGTC -1.08628962221  
CTTCATAA 0.0288994769618  
CTTCATAC 0.00507746121336  
CTTCATCA 1.12615758119  
CTTCATCC -0.397950966824  
CTTCATGA 0.533915760295  
CTTCATGC -0.182647875359  
CTTCATTA 1.55996928883  
CTTCATTC 0.581489011275  
CTTCCAAA -0.221152060316  
CTTCCAAC -0.326753677366  
CTTCCAAG -0.0460527189297  
CTTCCACA -0.226997073784  
CTTCCACC -0.408196238499  
CTTCCAGA -0.432416706924  
CTTCCAGC -1.08614889389  
CTTCCATA 0.0591600216323  
CTTCCATC -0.398672719921  
CTTCCCAA -0.355048397262  
CTTCCCAC -0.294176736184  
CTTCCCCA -1.00003606769  
CTTCCCCC -1.01491225879  
CTTCCCGA -0.777326835998  
CTTCCCGC -0.611057364123  
CTTCCCTA -0.333925409174

CTTCCCTC -1.06913804566  
CTTCCGAA 0.429060253166  
CTTCCGAC 0.306725289157  
CTTCCGCA 0.337426962991  
CTTCCGCC -0.460408319664  
CTTCCGGA 0.779177330165  
CTTCCGGC -0.406211677706  
CTTCCGTA -0.0558304228358  
CTTCCGTC -0.64121985696  
CTTCCTAA -0.446556156108  
CTTCCTAC -0.464438853758  
CTTCCTCA -0.406735661711  
CTTCCTCC -1.29683980195  
CTTCCTGA 0.021156712923  
CTTCCTGC -0.617192994067  
CTTCCTTA 0.145081324075  
CTTCCTTC -0.342413866778  
CTTCGAAA 0.676746680282  
CTTCGAAC 0.172226901459  
CTTCGAAG -0.485011002881  
CTTCGACA -0.193695256835  
CTTCGACC -0.80023640761  
CTTCGAGA -0.443080208184  
CTTCGAGC -0.984478718206  
CTTCGATA 1.76137067038  
CTTCGATC -0.314272157706  
CTTCGCAA 0.40666633844  
CTTCGCAC -0.155459205131  
CTTCGCCA -0.239727574322  
CTTCGCCC -1.13450114691  
CTTCGCGA 0.329967529199  
CTTCGCGC -0.535492500403  
CTTCGCTA -0.349809806283  
CTTCGCTC -0.672736755809  
CTTCGGAA -0.539116462879  
CTTCGGAC -1.80435297211  
CTTCGGCA 0.903504765731  
CTTCGGCC -0.719242053692  
CTTCGGGA -0.121887381327  
CTTCGGGC -1.31838913856  
CTTCGGTA 0.370285777174  
CTTCGGTC -0.301511055003  
CTTCGTAA 0.611034464544  
CTTCGTAC -0.0493506746715  
CTTCGTCA -0.559120286085  
CTTCGTCC -1.32025462155  
CTTCGTGA 0.785001317656  
CTTCGTGC -0.727627879547  
CTTCGTTA 0.70041630974  
CTTCGTTC -0.488558772213  
CTTCTAAA 1.26254851501  
CTTCTAAC 0.802511584879  
CTTCTACA 0.144304403811  
CTTCTACC -0.936910879854

CTTCTAGA 0.0802842587886  
CTTCTAGC -0.581716757997  
CTTCTATA 0.104863209714  
CTTCTATC -0.644527805245  
CTTCTCAA 0.62515101415  
CTTCTCAC -0.618226181439  
CTTCTCCA -0.436915641498  
CTTCTCCC -0.83178432498  
CTTCTCGA 0.00948146662412  
CTTCTCGC -0.675293597901  
CTTCTCTA 0.749722434322  
CTTCTCTC -0.41524535347  
CTTCTGAA -0.171400851188  
CTTCTGAC 0.129809386617  
CTTCTGCA 1.03548190977  
CTTCTGCC -0.576634716868  
CTTCTGGA -0.911915156589  
CTTCTGGC -1.34424109791  
CTTCTGTA -0.0752825743642  
CTTCTGTC -1.20401240282  
CTTCTTAA -0.244091817736  
CTTCTTAC -0.116257415725  
CTTCTTCA 0.406328049203  
CTTCTTCC -1.28465847495  
CTTCTTGA -0.201560845889  
CTTCTTGC 0.351655512356  
CTTCTTTA 0.364257775251  
CTTCTTTC -0.0896922385817  
CTTGAAAA -0.218068736083  
CTTGAAAC -0.0831367136285  
CTTGAAAG -0.085850730104  
CTTGAACA -0.46017661756  
CTTGAACC 0.595707568096  
CTTGAAGA 0.359341651982  
CTTGAAGC -0.136272064186  
CTTGAATA 0.339144431422  
CTTGAATC -0.522785523978  
CTTGACAA 0.913618260738  
CTTGACAC -0.517127870702  
CTTGACCA -0.84004524404  
CTTGACCC -1.46331932542  
CTTGACGA 0.583724010192  
CTTGACGC -0.656836120816  
CTTGACTA 0.0483672418396  
CTTGACTC -1.16058564107  
CTTGAGAA 0.909960989782  
CTTGAGAC 0.854450952876  
CTTGAGCA 0.2325323184  
CTTGAGCC -1.35062258606  
CTTGAGGA -0.582314228833  
CTTGAGGC -0.681640736685  
CTTGAGTA 0.429460787622  
CTTGAGTC -0.695041362177  
CTTGATAA 1.3491532658

CTTGATAC 1.3828139816  
CTTGATCA -0.177895588168  
CTTGATCC 0.166700816674  
CTTGATGA 0.754874215078  
CTTGATGC -0.395135567667  
CTTGATTA 2.27106637861  
CTTGATTC 3.23050003536  
CTTGCAAA 1.27789123298  
CTTGCAAC 0.474171591218  
CTTGCAAG 0.855064453417  
CTTGCAACA -0.293424380922  
CTTGCAACC 0.016217481896  
CTTGCAAGA -0.0589988918669  
CTTGCAAGC -0.508596112075  
CTTGCAATA 0.636930973978  
CTTGCAATC -0.612388662379  
CTTGCCAA 0.932021611545  
CTTGCCAC -0.935082452554  
CTTGCCCA -1.3257677993  
CTTGCCCC -1.16397810962  
CTTGCCGA -0.116404389387  
CTTGCCGC -0.0598153659496  
CTTGCCTA -0.233113967709  
CTTGCCTC -1.22086836661  
CTTGCGAA 1.72503195289  
CTTGCGAC -0.167222927076  
CTTGCGCA 0.810761886862  
CTTGCGCC -0.29465075747  
CTTGCGGA 0.742055238894  
CTTGCGGC -0.40861176177  
CTTGCGTA -0.40979754361  
CTTGCGTC -0.0693840591522  
CTTGCTAA 1.38704519928  
CTTGCTAC 0.605592691846  
CTTGCTCA 0.718923541365  
CTTGCTCC -0.654816169764  
CTTGCTGA 0.636678245896  
CTTGCTGC -0.274150429755  
CTTGCTTA 0.130194515901  
CTTGCTTC -0.128396066233  
CTTGGAAA 1.79827479929  
CTTGGAAC -0.685714571801  
CTTGGACA -0.584584409831  
CTTGGACC 0.195191015704  
CTTGGAGA -0.689003784067  
CTTGGAGC -0.27510138682  
CTTGGATA 1.62581015857  
CTTGGATC 1.46657939277  
CTTGGCAA 0.490363259043  
CTTGGCAC -0.618133958589  
CTTGGCCA -0.123993101712  
CTTGGCCC -0.203580172407  
CTTGCGCA 0.31047707292  
CTTGCGC -0.986478892348

CTTGGCTA -0.422699582813  
CTTGGCTC -0.880856041143  
CTTGGGAA 0.232053092664  
CTTGGGAC -0.0863572271574  
CTTGGGCA -0.558386666843  
CTTGGGCC -1.21253958153  
CTTGGGGA 0.217010150996  
CTTGGGGC -1.09154299382  
CTTGGGTA -0.34036143996  
CTTGGGTC -1.1485941724  
CTTGGTAA 1.01873898663  
CTTGGTAC -0.694757615575  
CTTGGTCA -0.601191809105  
CTTGGTCC -0.250331953032  
CTTGGTGA 0.507926819832  
CTTGGTGC -0.788048627096  
CTTGGTTA -0.858884935917  
CTTGGTTC -0.00519466542259  
CTTGTA AA 2.80068430427  
CTTGTA AC 1.79360890597  
CTTGTA CA 0.531540865767  
CTTGTA CC -0.0452439474327  
CTTGTA GA 0.504693399268  
CTTGTA GC -0.147794716017  
CTTGTA TA 0.988071662161  
CTTGTA TC 0.708219861753  
CTTGTA CA 0.373993427203  
CTTGTA CC -0.765476095653  
CTTGTA CC -0.151832119985  
CTTGTA CCC 0.300996855364  
CTTGTA CGA -0.738589283513  
CTTGTA CGC -0.636924728638  
CTTGTA CTA -0.00585084245188  
CTTGTA CTC -0.566766663714  
CTTGTA GAA 0.464180713049  
CTTGTA GAC 0.0856131990157  
CTTGTA GCA -0.220332463563  
CTTGTA GCC -0.992126761258  
CTTGTA GGA 0.102295958723  
CTTGTA GGC -0.861647874221  
CTTGTA GTA 0.541822776769  
CTTGTA GTC -0.0160617647583  
CTTGTA TA 1.33458705173  
CTTGTA TAC 0.100232290293  
CTTGTA TCA -0.978261274311  
CTTGTA TCC -1.29992416707  
CTTGTA TGA 0.723354818093  
CTTGTA TGC 0.237972217497  
CTTGTA TTA 0.219931304573  
CTTGTA TTC -0.867458330142  
CTTTA AAA 0.990301456629  
CTTTA AAC 0.130326917104  
CTTTA AAG -0.445244842939  
CTTTA ACA 0.622827747764

CTTTAACC 0.812914447294  
CTTTAAGA -0.420838263391  
CTTTAAGC 0.0516096140576  
CTTTAATA 1.11752339899  
CTTTAATC -0.406970902841  
CTTTACAA 0.844175079036  
CTTTACAC 1.37974522983  
CTTTACCA -0.652944025087  
CTTTACCC -0.95548743475  
CTTTACGA 0.18989392671  
CTTTACGC 0.571631783376  
CTTTACTA 0.936344635717  
CTTTACTC -0.846555386191  
CTTTAGAA 0.601139764607  
CTTTAGAC 0.990453010207  
CTTTAGCA 0.681460038188  
CTTTAGCC -1.19507657071  
CTTTAGGA 0.180062096526  
CTTTAGGC -0.51888489295  
CTTTAGTA 1.10139272732  
CTTTAGTC -1.11453729388  
CTTTATAA 1.00281649295  
CTTTATAC 1.78369609455  
CTTTATCA 0.573233713021  
CTTTATCC 0.801116584158  
CTTTATGA 0.234007467648  
CTTTATGC 0.426443247635  
CTTTATTA 1.64579462122  
CTTTATTC 0.715517333068  
CTTTCAA 1.11272801895  
CTTTCAAC 0.411240217091  
CTTTCACA -0.0615357488716  
CTTTCACC -0.391385657505  
CTTTCAGA -0.360577188361  
CTTTCAGC -0.686091998499  
CTTTCATA 1.12944929159  
CTTTCATC 1.17470968508  
CTTTCCAA -0.306585393547  
CTTTCAC -0.5773258678  
CTTTCCCA -0.628388598274  
CTTTCCCC 0.270375746412  
CTTTCCGA 0.0191215648778  
CTTTCCGC -0.616477902667  
CTTTCCTA 0.341702522581  
CTTTCCTC -1.26082958933  
CTTTCGAA 0.0585579708808  
CTTTCGAC -0.25353497961  
CTTTCGCA 0.748348459578  
CTTTCGCC -0.27239507293  
CTTTCGGA -0.656555496884  
CTTTCGGC 0.818952649938  
CTTTCGTA 0.0700456488093  
CTTTCGTC -1.05651912853  
CTTTCCTAA 0.379383155404

CTTTCTAC 0.535113200102  
CTTTCTCA -0.678326334881  
CTTTCTCC -0.107167531902  
CTTTCTGA 1.82765787373  
CTTTCTGC 0.315384036359  
CTTTCTTA 0.236735848405  
CTTTCTTC -0.0166009457564  
CTTTGAAA 0.778403740749  
CTTTGAAC -0.11431553142  
CTTTGACA -0.135542192148  
CTTTGACC -0.0222550600063  
CTTTGAGA 0.279210820373  
CTTTGAGC -0.108424510615  
CTTTGATA 0.426345820335  
CTTTGATC 0.564358044352  
CTTTGCAA 1.41580269885  
CTTTGCAC -0.769742703589  
CTTTGCCA -0.0643172150164  
CTTTGCCC 0.410253245234  
CTTTGCGA -0.111000921438  
CTTTGCGC -0.135087531414  
CTTTGCTA 0.102416285602  
CTTTGCTC -0.536657880799  
CTTTGGAA -0.221152060316  
CTTTGGAC 0.247551111421  
CTTTGGCA -0.349975932321  
CTTTGGCC -0.715777139201  
CTTTGGGA 0.805824737615  
CTTTGGGC -0.770330181881  
CTTTGGTA 0.256717812922  
CTTTGGTC -0.187084148358  
CTTTGTAA 0.50671647299  
CTTTGTAC 0.690487676791  
CTTTGTCA 0.514671786758  
CTTTGTCC -0.500030212258  
CTTTGTGA 0.37804332185  
CTTTGTGC 0.142390415357  
CTTTGTTA 0.308657597274  
CTTTGTTC -0.871053772234  
CTTTTAAA 2.55522288352  
CTTTTAAC -0.236431908538  
CTTTTACA -0.519411166913  
CTTTTACC -0.0162751471996  
CTTTTAGA -0.24365922387  
CTTTTAGC 0.241188775644  
CTTTTATA 1.68763777298  
CTTTTATC -0.358661118127  
CTTTTCAA -0.0694664976369  
CTTTTCAC -0.235637501322  
CTTTTCCA -0.331117712602  
CTTTTCCC -0.0278292339074  
CTTTTCGA 0.914545901868  
CTTTTCGC -0.594981026905  
CTTTTCTA 0.54420558206



CTTTTCTC -0.251039758203  
CTTTTGAA 0.369173690343  
CTTTTGAC 0.180663106387  
CTTTTGCA -0.227662202467  
CTTTTGCC -1.27683389696  
CTTTTGGA 0.0537794532633  
CTTTTGGC -0.196955948716  
CTTTTGTA 1.0711448815  
CTTTTGTC -0.682220096035  
CTTTTAA -0.202075461884  
CTTTTAC 1.41037674768  
CTTTTCA -0.582140608388  
CTTTTCC -1.05391960995  
CTTTTGA 0.486562553452  
CTTTTGC 0.699595880276  
CTTTTTA 1.73495996131  
CTTTTTC 0.377317613372  
GAAAAAAA 1.86896038725  
GAAAAAAC 0.0357549864008  
GAAAAACA -0.528273928546  
GAAAAACC 0.933901875164  
GAAAAAGA -0.197607962186  
GAAAAAGC -0.426320214442  
GAAAAATA 2.69603239521  
GAAAAATC 6.79232117323  
GAAAACAA -0.21086432033  
GAAAACAC -0.120466358357  
GAAAACCA -0.988633950917  
GAAAACCC -0.499024088025  
GAAAACGA 0.395805068088  
GAAAACGC 0.432993151782  
GAAAAC TA 0.450477604934  
GAAAAC TC -0.386046100201  
GAAAAGAA 0.0645226866941  
GAAAAGAC -0.664009101692  
GAAAAGCA -0.477465799756  
GAAAAGCC -0.262925888807  
GAAAAGGA 1.00844791579  
GAAAAGGC -0.567396610316  
GAAAAGTA 0.441952508003  
GAAAAGTC -0.262876550623  
GAAAATAA 1.27923835277  
GAAAATAC 2.99179752947  
GAAAATCA 6.98600498027  
GAAAATCC 17.1039412559  
GAAAATGA 0.415878214565  
GAAAATGC 1.29002467904  
GAAAATTA 2.2879308777  
GAAAATTC 2.0527141041  
GAAACAAA 0.507689288744  
GAAACAAC -0.0704586739445  
GAAACACA -0.721999579368  
GAAACACC 0.907943120511  
GAAACAGA 0.229009946784

GAAACAGC -0.457526928084  
GAAACATA 2.03032768378  
GAAACATC 1.43978438712  
GAAACCAA 1.21181449758  
GAAACCAC -0.650968832303  
GAAACCCA -1.07816047982  
GAAACCCC -1.36101941131  
GAAACCGA 0.317102962035  
GAAACCGC 0.26737423613  
GAAACCTA 0.532997695352  
GAAACCTC -0.799266298169  
GAAACGAA 0.748822480864  
GAAACGAC -0.733916312137  
GAAACGCA 0.0685421873545  
GAAACGCC -0.521697793972  
GAAACGGA 0.367875492388  
GAAACGGC -1.01341837352  
GAAACGTA 0.757001585974  
GAAACGTC 0.222380726822  
GAAACTAA 0.947535035473  
GAAACTAC 1.14928365791  
GAAACTCA -1.12498033465  
GAAACTCC -0.616464162919  
GAAACTGA 0.534047745141  
GAAACTGC -0.266066878344  
GAAACTTA -0.310908834075  
GAAACTTC 0.414372254974  
GAAAGAAA 0.756001082546  
GAAAGAAC -0.859251329182  
GAAAGACA -0.264476398488  
GAAAGACC -0.94393771978  
GAAAGAGA 0.350031307666  
GAAAGAGC -0.782899552654  
GAAAGATA 1.13645281558  
GAAAGATC 2.48430954885  
GAAAGCAA 1.52609748054  
GAAAGCAC -1.13722307415  
GAAAGCCA -1.16455392995  
GAAAGCCC -1.62120317962  
GAAAGCGA -0.0809962275196  
GAAAGCGC 0.279057185015  
GAAAGCTA 0.795884446697  
GAAAGCTC -1.13616323999  
GAAAGGAA -0.0842092466409  
GAAAGGAC -1.11283481426  
GAAAGGCA -0.431774894176  
GAAAGGCC -0.451221841254  
GAAAGGGA 0.28394270612  
GAAAGGGC -1.20881735904  
GAAAGGTA 0.427356524483  
GAAAGGTC 0.0205935914559  
GAAAGTAA 0.370098208804  
GAAAGTAC 0.427135439456  
GAAAGTCA -0.828284852942

GAAAGTCC -0.566219571952  
GAAAGTGA 0.917733106918  
GAAAGTGC 0.682415158813  
GAAAGTTA 0.0499462719053  
GAAAGTTC 0.939139217075  
GAAATAAA 2.98891343158  
GAAATAAC 0.987944257231  
GAAATACA 0.275088063428  
GAAATACC 0.341459370687  
GAAATAGA 1.4506804232  
GAAATAGC 1.15675225153  
GAAATATA 5.80326524552  
GAAATATC 8.32566803597  
GAAATCAA 7.2030451089  
GAAATCAC 8.09691706261  
GAAATCCA 14.7293775234  
GAAATCCC 19.0921418332  
GAAATCGA 6.66183479178  
GAAATCGC 9.40217433346  
GAAATCTA 17.3799315628  
GAAATCTC 18.3524796003  
GAAATGAA 0.418758773433  
GAAATGAC -0.0215335150876  
GAAATGCA 0.678869679439  
GAAATGCC -0.151083720105  
GAAATGGA -0.709504319961  
GAAATGGC -0.858709233692  
GAAATGTA 1.46381874442  
GAAATGTC 0.469888120865  
GAAATTAA 2.3935897437  
GAAATTAC 4.33036411169  
GAAATTCA -0.00407237787026  
GAAATTCC 1.72910974339  
GAAATTGA 1.92554441441  
GAAATTGC 2.52258640344  
GAAATTTA 1.74465002228  
GAAATTTT 7.02646229115  
GAACAAAA 0.433941610711  
GAACAAAC -0.158933487632  
GAACAACA 0.578730861065  
GAACAACC -0.746310605219  
GAACAAGA 0.246237508295  
GAACAAGC 0.714258272575  
GAACAATA 1.70680971694  
GAACAATC 3.25726527156  
GAACACAA 0.750914253323  
GAACACAC -0.689215292906  
GAACACCA -0.792941642609  
GAACACCC -0.592954622336  
GAACACGA 0.0743361972147  
GAACACGC 0.665912264891  
GAACACTA 1.33102866532  
GAACACTC -0.383413897676  
GAACAGAA 0.930159251232

GAACAGAC 0.310172300341  
GAACAGCA -0.378004808922  
GAACAGCC -0.38974542311  
GAACAGGA 1.95362304556  
GAACAGGC -0.876201181252  
GAACAGTA 1.10051296712  
GAACAGTC 0.235217398135  
GAACATAA 0.76716379463  
GAACATAC 0.301818117541  
GAACATCA -0.182728856597  
GAACATCC 0.44139105196  
GAACATGA 0.814010296241  
GAACATGC -0.365522040194  
GAACATTA 0.534711000222  
GAACATTC 0.118647090889  
GAACCAAA 0.186557874395  
GAACCAAC -0.138507895815  
GAACCACA -0.44287640193  
GAACCACC -0.282047870041  
GAACCAGA 1.08515609304  
GAACCAGC -0.893564474814  
GAACCATA 0.514160501611  
GAACCATC 0.550842088252  
GAACCCAA 0.263055375518  
GAACCCAC -0.731094875818  
GAACCCCA -1.28612529708  
GAACCCCC -1.29616613797  
GAACCCGA -0.140545333818  
GAACCCGC -0.530507470217  
GAACCCTA -0.392092629965  
GAACCCTC -1.18498160354  
GAACCGAA 0.352596060522  
GAACCGAC -0.38586789984  
GAACCGCA -0.928456355262  
GAACCGCC -1.04106607622  
GAACCGGA 0.0383459696834  
GAACCGGC -0.882190462069  
GAACCGTA -0.699277784305  
GAACCGTC -0.751989284472  
GAACCTAA 0.0131048045667  
GAACCTAC -0.953975854353  
GAACCTCA -0.929043417198  
GAACCTCC -1.22829324286  
GAACCTGA 0.853583475185  
GAACCTGC 0.00745069031677  
GAACCTTA -0.383253600622  
GAACCTTC -0.174768962913  
GAACGAAA 1.14354939513  
GAACGAAC -0.420760404822  
GAACGACA -1.11632158744  
GAACGACC -0.7697643541  
GAACGAGA 0.927077384246  
GAACGAGC -0.486507386284  
GAACGATA 1.54145060742

GAACGATC 0.908300562122  
GAACGCAA 0.65855525467  
GAACGCAC -0.624387833633  
GAACGCCA -1.36797318076  
GAACGCCC -1.37991135587  
GAACGCGA 1.08632730242  
GAACGCGC -0.116244092333  
GAACGCTA 0.356665940256  
GAACGCTC 0.036758612498  
GAACGGAA 1.17295890817  
GAACGGAC -0.489963973655  
GAACGGCA -0.244435727778  
GAACGGCC -0.923392425618  
GAACGGGA -0.347054362388  
GAACGGGC -1.33975611126  
GAACGGTA 0.15720581848  
GAACGGTC -0.0177854785282  
GAACGTAA 1.64541719452  
GAACGTAC -0.0857618381017  
GAACGTCA -0.771641078694  
GAACGTCC -1.09293632912  
GAACGTGA -0.172930126714  
GAACGTGC 0.608770737064  
GAACGTTA 0.812280128954  
GAACGTTC -0.180978704223  
GAACTAAA 0.805038865697  
GAACTAAC 0.273357687963  
GAACTACA -0.635263884622  
GAACTACC -0.11337123605  
GAACTAGA 0.0222304950033  
GAACTAGC 0.125509262024  
GAACTATA 0.909368307041  
GAACTATC -0.145012833516  
GAACTCAA -0.279606358557  
GAACTCAC -0.387426320285  
GAACTCCA -0.727241084839  
GAACTCCC -1.35704612617  
GAACTCGA -0.501939620796  
GAACTCGC -0.570285288127  
GAACTCTA 0.121875515182  
GAACTCTC -0.494406075639  
GAACTGAA 0.301818117541  
GAACTGAC -0.782754660771  
GAACTGCA -0.580778707967  
GAACTGCC -1.1123662056  
GAACTGGA -0.159258661654  
GAACTGGC -0.638192532607  
GAACTGTA -0.180371240843  
GAACTGTC -0.248200210399  
GAACTTAA 0.300927532093  
GAACTTAC 0.655520019554  
GAACTTCA -0.664367792372  
GAACTTCC -1.495459301  
GAACTTGA 0.817886154088

GAAC TTGC 0.861682431767  
GAAC TTTA 1.33524614325  
GAAG AAAA 1.45723199277  
GAAG AAAC -0.156385389015  
GAAG AACA 0.280092662345  
GAAG AAC C -0.532804506176  
GAAG AAGA 0.263715716107  
GAAG AAG C -0.629805665862  
GAAG AATA 0.645562033507  
GAAG AAT C 8.43908278122  
GAAG ACA A -0.455482828385  
GAAG ACAC -0.733954825066  
GAAG ACCA -0.9983891716  
GAAG ACC C -1.28217262156  
GAAG AC GA -0.0944699234873  
GAAG AC GC -0.837609145183  
GAAG ACTA 0.184487127914  
GAAG ACT C -0.348305095761  
GAAG AGAA -0.0350213671587  
GAAG AG AC -0.633102788892  
GAAG AG CA 0.236290347503  
GAAG AG CC -0.225219650092  
GAAG AG GA -0.405880466521  
GAAG AG GC -1.34221927325  
GAAG AG TA 0.290875241416  
GAAG AG TC -0.602614705677  
GAAG ATAA -0.266071458259  
GAAG ATAC 2.08608045622  
GAAG ATCA 3.48433749759  
GAAG ATCC 5.59587666494  
GAAG ATGA 0.381203880118  
GAAG ATGC 0.309327930407  
GAAG ATTA 6.4410920094  
GAAG ATTC 9.8410807811  
GAAG CAAA 0.127313748855  
GAAG CAAC -1.08310429076  
GAAG CACA -0.983509857833  
GAAG CACC -0.312967298055  
GAAG CAGA -0.155050135378  
GAAG CAGC -0.454069508  
GAAG CATA 1.06136801031  
GAAG CATC -0.0878927480229  
GAAG CCAA -0.975016612135  
GAAG CCAC -0.777011029985  
GAAG CCCA -1.11768765142  
GAAG CCCC -1.55261477675  
GAAG CCGA -0.264382302036  
GAAG CCGC -1.21113417191  
GAAG CCTA -0.427685029354  
GAAG CCTC -1.05388942414  
GAAG CGAA -0.00964571905944  
GAAG CGAC -0.665720949317  
GAAG CGCA -0.0553482826074  
GAAG CGCC -0.439883426946

GAAGCGGA -0.0115913505683  
GAAGCGGC -1.33160011391  
GAAGCGTA -0.367193501288  
GAAGCGTC -0.883567559483  
GAAGCTAA -0.959222147918  
GAAGCTAC -1.03864392529  
GAAGCTCA -0.847345421669  
GAAGCTCC -1.2056971873  
GAAGCTGA -0.242810690376  
GAAGCTGC -0.969424534926  
GAAGCTTA 0.0285426598844  
GAAGCTTC 0.947685339983  
GAAGGAAA 0.0786704629983  
GAAGGAAC -0.983953276955  
GAAGGACA -0.615480313731  
GAAGGACC -1.20976186259  
GAAGGAGA -0.681843502048  
GAAGGAGC -1.53003495907  
GAAGGATA 1.47794820106  
GAAGGATC 2.2121293156  
GAAGGCAA -0.955656267101  
GAAGGCAC -1.23920614135  
GAAGGCCA -1.42417998941  
GAAGGCCC -1.45286171219  
GAAGGCCG 0.253354281113  
GAAGGCCG -1.03591325457  
GAAGGCTA -0.657918438194  
GAAGGCTC -0.991236175811  
GAAGGGAA -0.086244394686  
GAAGGGAC -0.997534392766  
GAAGGGCA -1.01350622463  
GAAGGGCC -0.887753394358  
GAAGGGGA 0.168623964959  
GAAGGGGC -2.00444470592  
GAAGGGTA -0.0500293349239  
GAAGGGTC -1.1768435095  
GAAGGTAA 0.337686352769  
GAAGGTAC -0.959309166318  
GAAGGTCA -0.487059890674  
GAAGGTCC -1.00483665218  
GAAGGTGA 0.865683196408  
GAAGGTGC -1.16284832766  
GAAGGTTA -0.109875927572  
GAAGTAAA 0.788027809297  
GAAGTAAC -0.267309492775  
GAAGTACA -0.344963006285  
GAAGTACC -0.964668500532  
GAAGTAGA -0.0634060199475  
GAAGTAGC -0.0267273477983  
GAAGTATA 0.802765978385  
GAAGTATC 1.51552141404  
GAAGTCAA -0.501731859161  
GAAGTCAC -0.982285771243  
GAAGTCCA -0.746123453204

GAAGTCCC -0.638641780713  
GAAGTCGA 0.00760078664866  
GAAGTCGC -0.97665372386  
GAAGTCTA 0.211698281364  
GAAGTCTC -0.801374933046  
GAAGTGAA 0.48558432507  
GAAGTGAC 0.0687770121289  
GAAGTGCA 0.460930430067  
GAAGTGCC -0.531451349231  
GAAGTGGA -0.0489445194101  
GAAGTGGC -1.32123451535  
GAAGTGTA 0.785984750488  
GAAGTGTC 0.502365969323  
GAAGTTAA -0.00150575141272  
GAAGTTAC -0.339513322822  
GAAGTTCA -0.69448344516  
GAAGTTCC -0.975303481407  
GAAGTTGA 0.733012819654  
GAAGTTGC -0.41037794385  
GAAGTTTA -0.154294449269  
GAATAAAA 1.15147910301  
GAATAAAC 0.5164875152  
GAATAACA 0.117853724564  
GAATAACC 0.744395784053  
GAATAAGA 0.453232216118  
GAATAAGC -0.0652277855514  
GAATAATA 3.0886535891  
GAATAATC 3.84363688944  
GAATACAA 0.950974968605  
GAATACAC 0.621667155461  
GAATACCA 0.472055670112  
GAATACCC 0.771965420005  
GAATACGA 1.00243989896  
GAATACGC 2.17454298741  
GAATACTA 1.59235553897  
GAATACTC 0.650610349801  
GAATAGAA 0.606030490162  
GAATAGAC 0.189980320576  
GAATAGCA 0.24722572922  
GAATAGCC 1.19791382855  
GAATAGGA 0.108981178565  
GAATAGGC -1.03304102282  
GAATAGTA 0.31833787388  
GAATAGTC -0.550942638222  
GAATATAA 1.9139601419  
GAATATAC 3.08916820509  
GAATATCA 4.08891178271  
GAATATCC 11.8089432013  
GAATATGA 1.49323741729  
GAATATGC 1.49915466852  
GAATATTA 2.28362804679  
GAATATTC 3.57052485151  
GAATCAAA 3.92773996531  
GAATCAAC 3.34172787081



GAATCACA 5.44373956419  
GAATCACC 2.35508097882  
GAATCAGA 2.22738751331  
GAATCAGC 2.27895486724  
GAATCATA 3.32290691495  
GAATCATC 2.58966135231  
GAATCCAA 9.0287839979  
GAATCCAC 5.28829930326  
GAATCCCA 5.21568494621  
GAATCCCC 3.41448212347  
GAATCCGA 12.3296300829  
GAATCCGC 9.22463410513  
GAATCCTA 6.38467743912  
GAATCCTC 6.64529130315  
GAATCGAA 6.05337215814  
GAATCGAC 2.55460709302  
GAATCGCA 2.81325429957  
GAATCGCC 3.44824526285  
GAATCGGA 5.65337938158  
GAATCGGC 1.0222372096  
GAATCGTA 4.85184560873  
GAATCGTC 4.42674677456  
GAATCTAA 9.19966273869  
GAATCTAC 10.7732293812  
GAATCTCA 12.7375669316  
GAATCTCC 13.4125174522  
GAATCTGA 9.81703955392  
GAATCTGC 7.66112162688  
GAATCTTA 7.14262727584  
GAATGAAA 0.158320819803  
GAATGAAC -0.503961653628  
GAATGACA -0.479249885144  
GAATGACC 0.539699985789  
GAATGAGA -0.0283944371544  
GAATGAGC -0.680115832897  
GAATGATA 0.844448624917  
GAATGATC 0.796335568405  
GAATGCAA 1.04732473936  
GAATGCAC -0.938241969931  
GAATGCCA -0.891776225867  
GAATGCCC -0.660798997063  
GAATGCGA -0.108036050483  
GAATGCGC -0.479915846538  
GAATGCTA 1.19140826632  
GAATGCTC -0.524696389762  
GAATGGAA -0.0741044951101  
GAATGGAC -0.987937387357  
GAATGGCA 0.251564366742  
GAATGGCC -0.546854022468  
GAATGGGA -0.327379044052  
GAATGGGC -1.06993016292  
GAATGGTA 0.812728960704  
GAATGGTC -0.199827139575  
GAATGTAA 3.3317638476

GAATGTAC 0.414403273495  
GAATGTCA -0.50740262765  
GAATGTCC -0.930581852555  
GAATGTGA 0.802475361909  
GAATGTGC -0.138725233638  
GAATGTTA 1.81020714541  
GAATTTAA 1.50100932625  
GAATTTAC 1.80953389779  
GAATTTCA 1.03873115187  
GAATTTCC 3.73862649789  
GAATTTGA 3.00367366753  
GAATTTGC 3.00812243121  
GAATTTTA 3.19432140675  
GACAAAAA 1.64838622904  
GACAAAAC 1.05159093094  
GACAAACA 0.803724429858  
GACAAACC 1.22369646463  
GACAAAGA 1.2890753874  
GACAAAGC -0.630777232549  
GACAAATA 1.10714177073  
GACAAATC 3.78119244364  
GACAACAA 0.214686468255  
GACAACAC 0.527106258192  
GACAACCA 0.35220343683  
GACAACCC -0.169636750888  
GACAACGA 0.800568451506  
GACAACGC -0.00292823162883  
GACAACCTA 0.4535823715  
GACAACCTC -0.0573711481511  
GACAAGAA 1.29322541566

GACAAGAC -0.305507447906  
GACAAGCA 0.00351570992092  
GACAAGCC 0.0787803809778  
GACAAGGA -0.881776187865  
GACAAGGC -0.433705953225  
GACAAGTA 1.07725032564  
GACAAGTC -0.848868660033  
GACAATAA 0.713442839382  
GACAATAC -0.0499308667339  
GACAATCA 0.873225901397  
GACAATCC 6.52497191845  
GACAATGA -0.149687886672  
GACAATGC 1.18575269482  
GACAATTA 2.23440373616  
GACACAAA 2.14766595964  
GACACAAC 0.193484788886  
GACACACA -0.506162303176  
GACACACC 0.10618513996  
GACACAGA 0.525196641476  
GACACAGC -0.05621971568  
GACACATA 0.882426952267  
GACACATC 0.246381151109  
GACACCAA -0.489368376422  
GACACCAC -0.923363488877  
GACACCCA 0.263120327052  
GACACCCC -0.252325881835  
GACACCGA 1.26909342288  
GACACCGC 0.0628023037721  
GACACCTA -0.0867902373798  
GACACCTC -0.337136762871  
GACACGAA 0.565786978086  
GACACGAC -0.706119762174  
GACACGCA -0.324014263175  
GACACGCC 0.0754541130292  
GACACGGA -0.166521783601  
GACACGGC -1.01590276967  
GACACGTA 0.215968428327  
GACACGTC -1.41639871244  
GACACTAA -0.17950917578  
GACACTAC -0.651389560024  
GACACTCA -0.905632552983  
GACACTCC 0.0900007583652  
GACACTGA 0.296967778516  
GACACTGC -0.256863745694  
GACACTTA 1.31580731511  
GACAGAAA 0.373154053541  
GACAGAAC -0.0209014867054  
GACAGACA 0.280743843102  
GACAGACC -0.320806032148  
GACAGAGA 2.8203454665  
GACAGAGC -1.39587673421  
GACAGATA 2.61720892139  
GACAGATC 0.921266511968  
GACAGCAA 1.27005687063

GACAGCAC -0.906505235123  
GACAGCCA -1.21900683901  
GACAGCCC -0.80568838103  
GACAGCGA 0.0197893998746  
GACAGCGC -0.662658859239  
GACAGCTA 0.435695093934  
GACAGCTC 0.0562143030522  
GACAGGAA -0.365317401228  
GACAGGAC -0.879750824186  
GACAGGCA 1.00138984917  
GACAGGCC 0.474052929763  
GACAGGGA -0.547028059269  
GACAGGGC -1.35021247542  
GACAGGTA 0.180279642527  
GACAGGTC -1.23308071213  
GACAGTAA 0.585155650239  
GACAGTAC -0.74899193775  
GACAGTCA -0.647728958221  
GACAGTCC -0.371687855947  
GACAGTGA 0.442376982928  
GACAGTGC 1.15029727655  
GACAGTTA 0.083025130225  
GACATAAA -0.574161145973  
GACATAAC 0.117031629675  
GACATACA -0.412155159364  
GACATACC 0.0437148800849  
GACATAGA 0.876967692617  
GACATAGC -0.18000255762  
GACATATA 0.369199296236  
GACATATC 1.7892300901  
GACATCAA 0.954404076482  
GACATCAC -0.443200951419  
GACATCCA 1.04855881849  
GACATCCC 0.426911023582  
GACATCGA -0.181121930681  
GACATCGC -0.305022393186  
GACATCTA 2.0441044869  
GACATCTC 2.09415151696  
GACATGAA 0.354029574172  
GACATGAC -0.580360062027  
GACATGCA 0.408345085763  
GACATGCC -0.0626186907835  
GACATGGA 0.274827008227  
GACATGGC -1.16959724997  
GACATGTA 1.45113216944  
GACATGTC -0.0205300971685  
GACATTAA 0.0918560406256  
GACATTAC 1.37880822069  
GACATTCA -0.10374008945  
GACATTCC -0.581140104961  
GACATTGA -0.366152194974  
GACATTGC 0.279284515382  
GACATTTA 1.48619184135  
GACCAAAA -0.759368153381

GACCAAAC 0.0551176213928  
GACCAACA 0.547505619582  
GACCAACC 0.452588946125  
GACCAAGA -0.722858521761  
GACCAAGC -1.2082350852  
GACCAATA 1.12672778071  
GACCAATC 0.161268203807  
GACCACAA -0.318494007374  
GACCACAC -0.700043462958  
GACCACCA -0.761702869556  
GACCACCC -0.868235874941  
GACCACGA -0.445672024178  
GACCACGC -0.384756645721  
GACCACTA 0.543434282601  
GACCACTC -0.888790120756  
GACCAGAA -0.182849183476  
GACCAGAC -1.03336765409  
GACCAGCA -0.718855467162  
GACCAGCC -0.0582444548256  
GACCAGGA -0.208818971563  
GACCAGGC -1.31069154915  
GACCAGTA -0.128432081025  
GACCAGTC -0.946285134812  
GACCATAA -0.7697643541  
GACCATAC 0.0070593156927  
GACCATCA 0.176319680772  
GACCATCC -0.66538266008  
GACCATGA -0.825838345186  
GACCATGC 0.140189141275  
GACCATTA 1.54205369906  
GACCCAAA 0.396215595087  
GACCCAAC -0.496657312439  
GACCCACA -0.590604084634  
GACCCACC 0.516064081165  
GACCCAGA 0.573193118312  
GACCCAGC -1.54174455474  
GACCCATA -0.325585382477  
GACCCATC -1.17735104744  
GACCCCAA -0.489968969927  
GACCCCAC -1.25239796432  
GACCCCCA -1.03336765409  
GACCCCCC -1.38554361143  
GACCCCGA -1.26006453521  
GACCCCGC -0.311074751934  
GACCCCTA -0.64843905335  
GACCCCTC -1.50992371603  
GACCCGAA -0.287354327045  
GACCCGAC -1.07173485793  
GACCCGCA -0.269546365294  
GACCCGCC -0.797076057521  
GACCCGGA -1.04095324375  
GACCCGGC -1.58002349111  
GACCCGTA -0.159147494607  
GACCCGTC -1.72048159835

GACCCTAA -0.805671310435  
GACCCTAC -0.402969721844  
GACCCTCA -1.0120319081  
GACCCTCC -0.166587359668  
GACCCTGA -0.811001916086  
GACCCTGC -1.01523056294  
GACCCTTA -0.346521010373  
GACCGAAA 0.0763359550013  
GACCGAAC 0.00879572832003  
GACCGACA 0.1741504661  
GACCGACC -1.28775241626  
GACCGAGA -0.381862555283  
GACCGAGC -1.50996805794  
GACCGATA 1.53511366936  
GACCGATC -0.646775711198  
GACCGCAA -1.11923795293  
GACCGCAC -0.714546807271  
GACCGCCA -0.983653084291  
GACCGCCC -1.46163891267  
GACCGCGA -0.524581059155  
GACCGCGC -1.09747315209  
GACCGCTA -0.580441459621  
GACCGCTC -0.863278740606  
GACCGGAA -0.441531363927  
GACCGGAC -1.16447190782  
GACCGGCA -0.770821273763  
GACCGGCC -0.934162930365  
GACCGGGA 0.501002403478  
GACCGGGC -1.59770612971  
GACCGGTA 0.949313083699  
GACCGGTC -0.940434500538  
GACCGTAA -0.276311317307  
GACCGTAC -0.991178510507  
GACCGTCA -1.01404998555  
GACCGTCC -0.321800706591  
GACCGTGA 0.342769018432  
GACCGTGC -0.739746753146  
GACCGTTA -0.421139496944  
GACCTAAA -0.145625917701  
GACCTAAC -0.510114354167  
GACCTACA 0.268352256335  
GACCTACC -0.38469460868  
GACCTAGA 0.115701164131  
GACCTAGC -0.954508998189  
GACCTATA 0.0467315873601  
GACCTATC -0.942952621524  
GACCTCAA -1.5239686524  
GACCTCAC -0.945058966442  
GACCTCCA -1.19821589482  
GACCTCCC -1.05080006275  
GACCTCGA -0.589107493053  
GACCTCGC -0.987624287658  
GACCTCTA -0.387878274704  
GACCTCTC -1.07465101524

GACCTGAA -1.37126135214  
GACCTGAC -0.699422676187  
GACCTGCA -0.557807099314  
GACCTGCC -0.187671210294  
GACCTGGA -0.150189179276  
GACCTGGC -1.3066104278  
GACCTGTA 0.451065915939  
GACCTTAA 0.139831283307  
GACCTTAC -0.893706452204  
GACCTTCA -0.468318458808  
GACCTTCC -0.875949702239  
GACCTTGA -0.518805368958  
GACCTTGC 0.214522423997  
GACCTTTA -0.223220933195  
GACGAAAA 0.568897573635  
GACGAAAC 0.126543282108  
GACGAACA -0.462758857367  
GACGAACC -0.0809208670867  
GACGAAGA -0.422767448838  
GACGAAGC -0.911175083829  
GACGAATA 0.958016380991  
GACGAATC 2.21870066208  
GACGACAA -0.180788845894  
GACGACAC 0.0393304434053  
GACGACCA -1.35403732966  
GACGACCC -0.919482634759  
GACGACGA 0.432878029353  
GACGACGC -1.35066630344  
GACGACTA -0.314737227339  
GACGACTC -0.758272096256  
GACGAGAA -0.00370848274107  
GACGAGAC -0.128111486918  
GACGAGCA -0.479708084903  
GACGAGCC -0.988062085974  
GACGAGGA -0.444715654485  
GACGAGGC -0.406563914868  
GACGAGTA 1.59191586706  
GACGAGTC -1.26968839558  
GACGATAA 0.520529915439  
GACGATAC 0.918042459414  
GACGATCA 0.326874836957  
GACGATCC 2.30538223055  
GACGATGA 0.580881547895  
GACGATGC 0.222440265727  
GACGATTA 2.85611002909  
GACGCAA 0.322980243091  
GACGCAAC -0.153273128042  
GACGCACA -1.13285008726  
GACGCACC -0.854470521607  
GACGCAGA 0.335245673996  
GACGCAGC -1.40600147083  
GACGCATA 0.188855743066  
GACGCATC -0.115943691491  
GACGCCAA -0.95616318051

GACGCCAC -0.246456927898  
GACGCCCA -1.14944728581  
GACGCCCC -1.80771109129  
GACGCCGA -0.0271158079304  
GACGCCGC -0.240053789234  
GACGCCTA -0.918630978596  
GACGCCTC -1.15312953813  
GACGCGAA 0.337919928475  
GACGCGAC -0.406945921482  
GACGCGCA -0.833797614336  
GACGCGCC -0.720092668966  
GACGCGGA -0.491972058562  
GACGCGGC -1.28866090502  
GACGCGTA -0.108934338517  
GACGCGTC -0.329818057401  
GACGCTAA 0.258059103722  
GACGCTAC -0.998427268172  
GACGCTCA -1.61478963205  
GACGCTCC -0.955672504984  
GACGCTGA 0.924827396513  
GACGCTGC -0.0880010005785  
GACGCTTA 0.0284348236848  
GACGGAAA 0.984744145145  
GACGGAAC 0.444996694774  
GACGGACA -1.18735816349  
GACGGACC -0.973666786038  
GACGGAGA 0.803219598229  
GACGGAGC -1.11886448161  
GACGGATA 0.266992021338  
GACGGATC 0.195701468139  
GACGGCAA -0.798970477244  
GACGGCAC -0.817889901292  
GACGGCCA -0.504430886821  
GACGGCCC -1.27770220737  
GACGGCGA -0.622567525275  
GACGGCGC -0.54067529968  
GACGGCTA -1.14456925911  
GACGGCTC -0.386395839226  
GACGGGAA -0.0989744788679  
GACGGGAC -0.465582583644  
GACGGGCA -0.885846900312  
GACGGGCC -1.40410892471  
GACGGGGA -0.453430817922  
GACGGGGC -1.2545888295  
GACGGGTA -0.0896331160321  
GACGGTAA -0.190335264052  
GACGGTAC -0.564552482596  
GACGGTCA -1.24631417069  
GACGGTCC -1.09590786177  
GACGGTGA 0.27845346884  
GACGGTGC -0.678552624358  
GACGGTTA -0.336214534369  
GACGTAAA 0.107443992275  
GACGTAAC 1.19754389626



GACGTACA -0.269032165655  
GACGTACC 0.319592770813  
GACGTAGA 1.06296348644  
GACGTAGC -0.734465693857  
GACGTATA 0.671058216663  
GACGTATC 2.37393066325  
GACGTCAA -0.414529637535  
GACGTCCAC -0.016094240525  
GACGTCCA -0.135888600326  
GACGTCCC -1.00006958435  
GACGTCGA 0.289914291807  
GACGTCGC -0.801674501175  
GACGTCTA 0.485200444853  
GACGTCTC -1.11265390759  
GACGTGAA 0.782944935456  
GACGTGAC 0.0672360786356  
GACGTGCA -0.340341663051  
GACGTGCC -0.141252306277  
GACGTGGA 0.634383708074  
GACGTGGC -0.780841296851  
GACGTGTA 0.293160827585  
GACGTTAA 0.286788499264  
GACGTTAC 0.388075211084  
GACGTTCA -0.942952621524  
GACGTTCC -1.06695675667  
GACGTTGA 0.482914442328  
GACGTTGC 0.257535327895  
GACGTTTA 0.522625851458  
GACTAAAA 1.7153042117  
GACTAAAC 0.380200254021  
GACTAACA -0.0902878358155  
GACTAACC -0.289726723437  
GACTAAGA -0.169122551249  
GACTAAGC -0.324859882177  
GACTAATA 0.8023373399  
GACTAATC 0.429784296221  
GACTACAA 0.564542073696  
GACTACAC -0.252315264757  
GACTACCA -0.949503566561  
GACTACCC -0.00280998652964  
GACTACGA 0.593978025342  
GACTACGC 0.500961184236  
GACTACTA 0.874177274819  
GACTACTC -1.16765036939  
GACTAGAA 1.2017480508  
GACTAGAC 0.106371251085  
GACTAGCA -0.602492713374  
GACTAGCC -0.633569940305  
GACTAGGA -0.194738853107  
GACTAGGC -0.628193327318  
GACTAGTA -0.106515934789  
GACTAGTC -1.42109000348  
GACTATAA 0.863499409277  
GACTATAC 0.765657418683

GACTATCA -0.892868743966  
GACTATCC 0.884895943247  
GACTATGA -0.701530686529  
GACTATGC 1.06426626431  
GACTATTA 1.24764317899  
GACTCAAA 0.525594885973  
GACTCAAC -0.88191358534  
GACTCACA -0.658932889547  
GACTCACC -0.462180747084  
GACTCAGA 0.458089841373  
GACTCAGC -1.13783220295  
GACTCATA 0.612406357508  
GACTCATC -0.0712260180212  
GACTCCAA 0.187779671028  
GACTCCAC -1.23524409782  
GACTCCCA -1.45966621802  
GACTCCCC -1.0033787817  
GACTCCGA 0.057373021753  
GACTCCGC 0.102118382896  
GACTCCTA -1.07440265889  
GACTCCTC -1.25986322709  
GACTCGAA 0.729680098188  
GACTCGAC -0.313850805451  
GACTCGCA -1.11115856508  
GACTCGCC -0.441392301028  
GACTCGGA -0.636922022325  
GACTCGGC -1.32009869623  
GACTCGTA 0.281714785255  
GACTCTAA -0.122665342482  
GACTCTAC 0.0710934086406  
GACTCTCA -0.870390517153  
GACTCTCC -0.851338067368  
GACTCTGA -0.395219879753  
GACTCTGC 0.949813335413  
GACTCTTA -0.166447464058  
GACTGAAA 1.90752640107  
GACTGAAC 0.30108949457  
GACTGACA -0.726280343408  
GACTGACC -0.669107588883  
GACTGAGA -0.369886908142  
GACTGAGC -0.706180758326  
GACTGATA 1.00966534069  
GACTGATC -0.6448952394  
GACTGCAA -0.599180809707  
GACTGCAC -1.36158190825  
GACTGCCA -0.991122094271  
GACTGCCC -0.507698656754  
GACTGCGA 0.0433859588583  
GACTGCGC -0.669707766032  
GACTGCTA -0.403443951309  
GACTGCTC -0.750702536306  
GACTGGAA 2.23933984452  
GACTGGAC -0.367434571402  
GACTGGCA -0.79075244285

GACTGGCC -0.637064207893  
GACTGGGA 0.0984044875271  
GACTGGGC -1.58628257061  
GACTGGTA 0.174476889191  
GACTGTAA 0.340016697206  
GACTGTAC -0.249457605468  
GACTGTCA -1.43949377064  
GACTGTCC -0.158855212707  
GACTGTGA -0.444584085994  
GACTGTGC -0.72480207149  
GACTGTTA 0.615770513851  
GACTTAAA -0.0954421147077  
GACTTAAC 0.45580363067  
GACTTACA -0.324197667986  
GACTTACC 0.0127835859257  
GACTTAGA -0.12457371013  
GACTTAGC -0.721485379729  
GACTTATA 0.478910555017  
GACTTATC 0.938771158386  
GACTTCAA -0.641925996707  
GACTTCAC -0.623580311204  
GACTTCCA -0.947385563675  
GACTTCCC -0.423133425747  
GACTTCGA 0.13469823857  
GACTTCGC -0.338444745192  
GACTTCTA 0.108103916508  
GACTTCTC -1.0178690108  
GACTTGAA 0.595707568096  
GACTTGAC -0.686157574567  
GACTTGCA -0.0475642993262  
GACTTGCC -0.943516159347  
GACTTGGA 0.151300433394  
GACTTGGC -0.985805644724  
GACTTGTA 0.873677231283  
GACTTTAA 0.574127837494  
GACTTTAC 0.921699522191  
GACTTTCA -0.303778321509  
GACTTTCC 0.0297332298179  
GACTTTGA 0.513417306181  
GACTTTGC 0.610506525158  
GACTTTTA 0.314246759991  
GAGAAAAA 0.92898304558  
GAGAAAAC -0.0798152337737  
GAGAAACA 0.263008951826  
GAGAAACC 0.239720912626  
GAGAAAGA 0.574976787344  
GAGAAAGC -0.189420529957  
GAGAAATA 3.12842745163  
GAGAAATC 10.1630217997  
GAGAACAA 0.246237508295  
GAGAACAC 0.133103803333  
GAGAACCA -0.619348052636  
GAGAACCC -0.171743512162  
GAGAACGA -0.548101841349

GAGAACGC -0.176414609936  
GAGAACTA -0.714007001739  
GAGAACTC -0.886642556595  
GAGAAGAA -0.0011941089594  
GAGAAGAC -1.18321084155  
GAGAAGCA -0.0779214385848  
GAGAAGCC -1.25339222241  
GAGAAGGA -0.801280836593  
GAGAAGGC -1.65208680102  
GAGAAGTA 1.50591878782  
GAGAATAA 1.43847661298  
GAGAATAC 1.01106096594  
GAGAATCA 6.52100737678  
GAGAATCC 20.7948325404  
GAGAATGA -0.400530083961  
GAGAATGC -0.61566392672  
GAGAATTA 0.90643195647  
GAGACAAA -0.418297034648  
GAGACAAC -0.385881223231  
GAGACACA 0.418087607589  
GAGACACC 0.0300246790061  
GAGACAGA 0.646937257319  
GAGACAGC -1.3977440908  
GAGACATA 0.506927357295  
GAGACATC 0.14286901656  
GAGACCAA 0.235094781298  
GAGACCAC -1.06636761295  
GAGACCCA -1.09642476773  
GAGACCCC -1.49014097785  
GAGACCGA -0.272739399328  
GAGACCGC -0.419005672531  
GAGACCTA -0.250049455497  
GAGACCTC -1.25700619234  
GAGACGAA -1.06634679515  
GAGACGAC -1.36547233855  
GAGACGCA -1.00349598591  
GAGACGCC -1.41273623704  
GAGACGGA -1.43421437678  
GAGACGGC -1.50231147959  
GAGACGTA 0.988224464807  
GAGACTAA -0.134277302671  
GAGACTAC -0.591547339113  
GAGACTCA -0.0761760743038  
GAGACTCC -0.406970902841  
GAGACTGA 0.164147513608  
GAGACTGC -0.981294427647  
GAGACTTA -0.445054984611  
GAGAGAAA 0.777791905631  
GAGAGAAC -0.726482067882  
GAGAGACA -1.66912804322  
GAGAGACC -0.852417262076  
GAGAGAGA -0.384472690941  
GAGAGAGC -1.50909017135  
GAGAGATA 2.19180031837

GAGAGATC 2.62355023119  
GAGAGCAA -0.332951968886  
GAGAGCAC -1.57737671613  
GAGAGCCA -1.17531465033  
GAGAGCCC -0.897168035847  
GAGAGCGA -0.845751402788  
GAGAGCGC -1.14796214402  
GAGAGCTA 0.629062262254  
GAGAGCTC -0.93878115093  
GAGAGGAA -0.495824184117  
GAGAGGAC -0.794097446818  
GAGAGGCA -1.30649051728  
GAGAGGCC -1.24411872559  
GAGAGGGA -0.863679275062  
GAGAGGGC -1.93912469751  
GAGAGGTA -0.285725958796  
GAGAGTAA 0.285408903714  
GAGAGTAC -0.135719143441  
GAGAGTCA -0.851338067368  
GAGAGTCC -1.54795367152  
GAGAGTGA -0.412027338077  
GAGAGTGC -1.31199432702  
GAGAGTTA -0.729034330058  
GAGATAAA -0.0390841688414  
GAGATAAC -0.28847016108  
GAGATACA 0.715917034812  
GAGATACC 4.8201752827  
GAGATAGA -0.0449279332415  
GAGATAGC 0.936406048224  
GAGATATA 3.4413841326  
GAGATATC 16.8330608861  
GAGATCAA 1.1646376175  
GAGATCAC 2.00260815967  
GAGATCCA 4.85049786441  
GAGATCCC 7.47429728466  
GAGATCGA 1.01168591627  
GAGATCGC 8.22917816143  
GAGATCTA 8.29841274878  
GAGATCTC 15.6187611596  
GAGATGAA -0.549783086809  
GAGATGAC -1.07456691133  
GAGATGCA -0.210257273307  
GAGATGCC -0.477264075282  
GAGATGGA -0.0965798074314  
GAGATGGC -0.326613573577  
GAGATGTA 1.46208025001  
GAGATTAA 1.01924256919  
GAGATTAC 14.7662926858  
GAGATTCA 2.05957960608  
GAGATTCC 17.4045796288  
GAGATTGA 1.03750831434  
GAGATTGC 16.4650005316  
GAGATTTA 4.51394337538  
GAGCAAAA 0.641148035553

GAGCAAAC -0.869899425271  
GAGCAACA -0.439403993031  
GAGCAACC -0.603185321552  
GAGCAAGA -0.734516905643  
GAGCAAGC -1.02059801609  
GAGCAATA 0.768877932212  
GAGCAATC 4.11083896238  
GAGCACAA 1.02833973924  
GAGCACAC -0.849310830087  
GAGCACCA -1.02737379336  
GAGCACCC -0.608828610546  
GAGCACGA -0.420298249681  
GAGCACGC -0.325754631184  
GAGCACTA -0.526619954404  
GAGCACTC -0.549590313989  
GAGCAGAA -0.991561974367  
GAGCAGAC -0.687481170237  
GAGCAGCA -0.882844973674  
GAGCAGCC -1.70211467869  
GAGCAGGA -0.0732692850081  
GAGCAGGC -1.55079217843  
GAGCAGTA 1.09113496496  
GAGCATAA 0.00430303908488  
GAGCATAC -0.931912109921  
GAGCATCA 0.034693486822  
GAGCATCC -0.389134628883  
GAGCATGA -0.525390663364  
GAGCATGC -0.967352539377  
GAGCATT A 0.240603379132  
GAGCCAAA -0.320899295888  
GAGCCAAC -1.06508627742  
GAGCCACA -0.821630651621  
GAGCCACC -0.933888551773  
GAGCCAGA -0.306326420125  
GAGCCAGC -1.50176501236  
GAGCCATA 0.388557767668  
GAGCCATC -0.600775036766  
GAGCCCAA -0.803052847657  
GAGCCCAC -1.31731160928  
GAGCCCCA -1.3963838558  
GAGCCCCC -1.79468830886  
GAGCCCGA -0.388340429845  
GAGCCCGC -1.54423498805  
GAGCCCTA -1.11364483483  
GAGCCCTC -1.64643497672  
GAGCCGAA -0.794016465579  
GAGCCGAC -1.13804537722  
GAGCCGCA -1.52127732733  
GAGCCGCC -1.87857675321  
GAGCCGGA -0.358700671946  
GAGCCGGC -1.39350558689  
GAGCCGTA 0.41617819905  
GAGCCTAA -0.311891434195  
GAGCCTAC -0.45740909934

GAGCCTCA -0.845812607117  
GAGCCTCC -1.49117291615  
GAGCCTGA -0.885019600973  
GAGCCTGC -1.67046725224  
GAGCCTTA -0.991151655546  
GAGCGAAA -7.16132290855E-5  
GAGCGAAC -0.495445924706  
GAGCGACA -0.521628470701  
GAGCGACC -1.33452314109  
GAGCGAGA -0.390192381258  
GAGCGAGC -0.654832615826  
GAGCGATA 0.708219861753  
GAGCGATC 3.79183429439  
GAGCGCAA -0.0703633284244  
GAGCGCAC -0.392234190999  
GAGCGCCA -1.4146889466  
GAGCGCCC -0.307765346403  
GAGCGCGA -0.0498205323984  
GAGCGCGC 0.226335692305  
GAGCGCTA 0.590667162565  
GAGCGCTC -0.359877293954  
GAGCGGAA -0.973999454468  
GAGCGGAC -1.47606981104  
GAGCGGCA -0.661991024242  
GAGCGGCC -1.11116855762  
GAGCGGGA -0.408768519798  
GAGCGGGC -1.39165030463  
GAGCGGTA 0.796240431063  
GAGCGTAA 0.00648890799591  
GAGCGTAC 0.386431021307  
GAGCGTCA -1.2976262984  
GAGCGTCC -1.26972711669  
GAGCGTGA 0.278920620252  
GAGCGTGC -1.10680077518  
GAGCGTTA 0.109469564133  
GAGCTAAA -0.687934165546  
GAGCTAAC -0.733595926208  
GAGCTACA -0.384453954922  
GAGCTACC -1.09754434896  
GAGCTAGA -0.464246080938  
GAGCTAGC -0.535415682724  
GAGCTATA 0.00881966878906  
GAGCTATC -0.221270721771  
GAGCTCAA -1.23701048807  
GAGCTCAC -0.676429833379  
GAGCTCCA -0.864203467245  
GAGCTCCC -0.331654603642  
GAGCTCGA -0.517918322536  
GAGCTCGC -1.12544602881  
GAGCTCTA -0.194941202114  
GAGCTGAA -0.709504319961  
GAGCTGAC -1.16785313475  
GAGCTGCA -0.393043795208  
GAGCTGCC -0.842631647407

GAGCTGGA -0.0348868841762  
GAGCTGGC -0.986578401428  
GAGCTGTA 0.752066934862  
GAGCTTAA 0.431555890929  
GAGCTTAC -0.68996223554  
GAGCTTCA -0.510239677318  
GAGCTTCC -0.99031373913  
GAGCTTGA -0.310672343876  
GAGCTTGC -0.620536748967  
GAGCTTTA -0.97474972795  
GAGGAAAA 0.212249536686  
GAGGAAAC -1.31284910585  
GAGGAACA 0.185822173373  
GAGGAACC -1.18197613788  
GAGGAAGA -0.367425619749  
GAGGAAGC -1.1622350353  
GAGGAATA 2.19358315469  
GAGGAATC 6.96127385123  
GAGGACAA -0.442099689843  
GAGGACAC 0.124390721676  
GAGGACCA -1.38077633542  
GAGGACCC -1.53394121091  
GAGGACGA -0.7575792799  
GAGGACGC -1.1574421534  
GAGGACTA -0.509766280566  
GAGGACTC -1.07336364254  
GAGGAGAA -0.310778098296  
GAGGAGAC -0.692381263801  
GAGGAGCA -0.947904967764  
GAGGAGCC -0.901947386177  
GAGGAGGA -0.35358303238  
GAGGAGGC -0.919058992546  
GAGGAGTA 0.372878009525  
GAGGATAA 1.96662542655  
GAGGATAC 3.63133364284  
GAGGATCA 1.4995843479  
GAGGATCC 4.3776598614  
GAGGATGA -0.595858288962  
GAGGATGC -0.408138781374  
GAGGATTA 0.182570433146  
GAGGCAAA 0.120084559921  
GAGGCAAC -1.00307463365  
GAGGCACA -1.14009426501  
GAGGCACC -1.26823302324  
GAGGCAGA 0.00584043355231  
GAGGCAGC -0.486595861931  
GAGGCATA -0.150157119865  
GAGGCATC -0.158543778432  
GAGGCCAA -0.61103696268  
GAGGCCAC -1.16920504263  
GAGGCCCA -1.4395641348  
GAGGCCCC -1.6480791665  
GAGGCCGA -0.716307784902  
GAGGCCGC -1.1804624757



GAGGCCTA -0.831351939292  
GAGGCCTC -0.757627577194  
GAGGCGAA 1.08931049304  
GAGGCGAC -0.779166088554  
GAGGCGCA -0.221141026882  
GAGGCGCC -0.582126868641  
GAGGCGGA -0.357347098645  
GAGGCGGC -1.03637749149  
GAGGCGTA -0.48499559771  
GAGGCTAA 0.0807865922821  
GAGGCTAC -0.213357043601  
GAGGCTCA -1.40119984546  
GAGGCTCC -1.58948851168  
GAGGCTGA -1.15165459706  
GAGGCTGC -1.20831211105  
GAGGCTTA -1.22780298369  
GAGGGAAA 1.01766811904  
GAGGGAAC -1.53429011722  
GAGGGACA -1.36275977932  
GAGGGACC -0.823680372126  
GAGGGAGA -0.619909300501  
GAGGGAGC -1.76826906449  
GAGGGATA 1.2177375778  
GAGGGATC 2.02762657434  
GAGGGCAA 0.219607379618  
GAGGGCAC -1.70181511056  
GAGGGCCA -1.52110995222  
GAGGGCCC -1.09145451818  
GAGGGCGA -0.44718818449  
GAGGGCGC -1.28306528878  
GAGGGCTA -1.60327614005  
GAGGGGAA -0.389437319683  
GAGGGGAC -1.83895527697  
GAGGGGCA -0.716315071131  
GAGGGGCC -0.921193857849  
GAGGGGGA -0.889005584977  
GAGGGGGC -1.32335022828  
GAGGGGTA 0.127882699305  
GAGGGTAA 0.561088192639  
GAGGGTAC -0.837020001467  
GAGGGTCA -1.48825030533  
GAGGGTCC -1.47174678687  
GAGGGTGA -0.363821850537  
GAGGGTGC -0.865124030323  
GAGGGTTA -1.13002719369  
GAGGTAAA 0.418041183897  
GAGGTAAAC -0.195906939817  
GAGGTACA -1.11418776303  
GAGGTACC -0.962273620917  
GAGGTAGA -0.61005540345  
GAGGTAGC -0.7483378425  
GAGGTATA -0.0723308186223  
GAGGTATC 1.33271740519  
GAGGTCAA -0.386901087212

GAGGTCAC -1.23349706811  
GAGGTCCA -1.15587457312  
GAGGTCCC -1.73116383563  
GAGGTCGA -0.614899497135  
GAGGTCGC -1.12238914319  
GAGGTCTA -0.619167145961  
GAGGTGAA -0.474500928801  
GAGGTGAC -1.35054889105  
GAGGTGCA -0.0806477375618  
GAGGTGCC -1.16037996121  
GAGGTGGA 0.703651395729  
GAGGTGGC -1.42705763379  
GAGGTGTA 0.593402205018  
GAGGTTAA 0.347189261726  
GAGGTTAC 0.572263187224  
GAGGTTCA -1.12756257445  
GAGGTTCC -0.962115613822  
GAGGTTGA -0.705262901561  
GAGGTTGC -0.334111936654  
GAGGTTTA -0.999811443638  
GAGTAAAA 1.01759400767  
GAGTAAAC -0.374695819747  
GAGTAACA -0.320806032148  
GAGTAACC 0.166669798153  
GAGTAAGA 1.15268029002  
GAGTAAGC -0.570591934308  
GAGTAATA 2.00742165119  
GAGTAATC 7.30126660797  
GAGTACAA 1.02585492673  
GAGTACAC -0.563934193961  
GAGTACCA -0.768113086271  
GAGTACCC -0.278537989104  
GAGTACGA -0.30905604995  
GAGTACGC 0.00256808370348  
GAGTACTA 0.238267830245  
GAGTACTC -0.630723522627  
GAGTAGAA 0.105694048078  
GAGTAGAC 0.740325279784  
GAGTAGCA -0.549013244596  
GAGTAGCC -0.760079497578  
GAGTAGGA -0.000352445339656  
GAGTAGGC -0.777142806654  
GAGTAGTA -0.39339603237  
GAGTATAA 1.2135415422  
GAGTATAC 1.46057054322  
GAGTATCA 2.17212208555  
GAGTATCC 4.0677407055  
GAGTATGA 0.538827095471  
GAGTATGC 0.206767377457  
GAGTATTA 1.80364204427  
GAGTCAAA 1.12326515617  
GAGTCAAC -1.04959346311  
GAGTCACA -1.41509031376  
GAGTCACC 0.445650373667

GAGTCAGA 0.907200965971  
GAGTCAGC -0.67291287439  
GAGTCATA 0.94019592856  
GAGTCATC -0.593152807784  
GAGTCCAA -0.128637136347  
GAGTCCAC -1.61853142327  
GAGTCCCA -0.615514871278  
GAGTCCCC -1.27932453845  
GAGTCCGA -0.0177854785282  
GAGTCCGC -0.736060753628  
GAGTCCTA -1.07642427537  
GAGTCGAA 0.405539679149  
GAGTCGAC -0.504680492233  
GAGTCGCA -0.906608491407  
GAGTCGCC -0.933140151893  
GAGTCGGA -0.0773118934256  
GAGTCGGC -0.729589332583  
GAGTCGTA 0.607957802007  
GAGTCTAA 0.389371951793  
GAGTCTAC -0.703382429764  
GAGTCTCA -0.115987617048  
GAGTCTCC -0.852417262076  
GAGTCTGA 0.269926290129  
GAGTCTGC -1.11763227608  
GAGTCTTA -0.40075408348  
GAGTGAAA 0.54021814081  
GAGTG AAC -1.10223584818  
GAGTGACA -0.834263724859  
GAGTGACC -0.419151188947  
GAGTGAGA 1.06898815751  
GAGTGAGC -0.517097060359  
GAGTGATA 1.60011391636  
GAGTGATC 0.496520955855  
GAGTGCAA 1.32593767254  
GAGTG CAC -0.483070784  
GAGTGCCA -1.28126330009  
GAGTGCCC -1.22538520449  
GAGTGCGA -0.191645744508  
GAGTGCGC 0.00436778244024  
GAGTGCTA 0.160941572538  
GAGTG GAA 0.987767930472  
GAGTG GAC -1.0809727563  
GAGTG GCA -0.549867190718  
GAGTG GCC -0.657351985879  
GAGTG GGA -0.687092293749  
GAGTG GGC -1.11227439911  
GAGTG GTA 1.02372484952  
GAGTG TAA 1.71283105716  
GAGTG TAC -0.503867348998  
GAGTG TCA -0.608365622693  
GAGTG TCC -1.41058617474  
GAGTG TGA 0.369567771281  
GAGTG TGC 0.521535831495  
GAGTG TTA -0.368752754445

GAGTTAAA -0.0930722164521  
GAGTTAAC -0.419015248719  
GAGTTACA 0.200984609208  
GAGTTACC -0.0844111792926  
GAGTTAGA 0.14836658096  
GAGTTAGC -0.277344712857  
GAGTTATA 0.730740556876  
GAGTTATC 0.430067001933  
GAGTTCAA 0.624386584565  
GAGTTCAC -0.426259426468  
GAGTTCCA -0.697451855141  
GAGTTCCC -0.915454390623  
GAGTTCGA 0.402840859667  
GAGTTCGC -0.248101534031  
GAGTTCTA -0.805831607488  
GAGTTGAA -0.204456185395  
GAGTTGAC -0.423344726409  
GAGTTGCA -0.508988111233  
GAGTTGCC -0.550818772317  
GAGTTGGA -0.117414260823  
GAGTTGGC -0.266532780689  
GAGTTGTA 0.757065080261  
GAGTTTAA 1.80455303116  
GAGTTTAC 0.267547440219  
GAGTTTCA -0.99198978014  
GAGTTTCC -0.960866337695  
GAGTTTGA 0.539653145741  
GAGTTTGC -0.448773876252  
GAGTTTTA 0.231314268972  
GATAAAAA 1.16666214847  
GATAAAAC 0.80190724417  
GATAAACA 0.174625111921  
GATAAACC 0.60528125757  
GATAAAGA 1.84933274167  
GATAAAGC -0.247232182738  
GATAAATA 1.73578850971  
GATAAATC 3.23549110271  
GATAACAA 0.642759333207  
GATAACAC 1.04281560406  
GATAACCA 0.221776386112  
GATAACCC -0.196009155211  
GATAACGA 1.69203365945  
GATAACGC 1.26946189793  
GATAACTA 1.00159178182  
GATAAGAA 1.47164373877  
GATAAGAC -0.38782685474  
GATAAGCA -0.529626460957  
GATAAGCC 0.310513712247  
GATAAGGA 0.88580568107  
GATAAGGC 0.799159086504  
GATAAGTA 1.41418598857  
GATAATAA 1.30117365138  
GATAATAC 1.79633582948  
GATAATCA 2.2117518889

GATAATCC 8.13196445201  
GATAATGA -0.349975932321  
GATAATGC 0.954478187847  
GATAATTA 2.11310112681  
GATACAAA 2.54986146753  
GATACAAC 1.08236484253  
GATACACA 0.779753983202  
GATACACC 1.32649017693  
GATACAGA 1.41018772206  
GATACAGC 0.440294370301  
GATACATA 2.40618784303  
GATACATC 0.691719674144  
GATACCAA 1.483213647  
GATACCAC 1.83037959279  
GATACCCA 3.25646232904  
GATACCCC 3.8653731699  
GATACCGA 5.04161629406  
GATACCGC 3.18027563766  
GATACCTA 2.20956373004  
GATACGAA 3.94278748689  
GATACGAC 2.66173507111  
GATACGCA 4.09145176238  
GATACGCC 4.31554350411  
GATACGGA 3.89066846129  
GATACGGC 3.46096202364  
GATACGTA 3.19478564367  
GATACTAA 2.08859274823  
GATACTAC 2.01255532047  
GATACTCA 4.16331376417  
GATACTCC 4.08364716948  
GATACTGA 2.57808707233  
GATACTGC 2.90333937002  
GATACTTA 2.32992766482  
GATAGAAA 0.451143774507  
GATAGAAC 0.30444157659  
GATAGACA -0.615485726359  
GATAGACC -0.524020644001  
GATAGAGA 1.76147475938  
GATAGAGC -0.342531070988  
GATAGATA 3.63923899389  
GATAGATC 1.7668434616  
GATAGCAA 1.91857586433  
GATAGCAC 0.329451039602  
GATAGCCA 0.394006826597  
GATAGCCC 0.780923110802  
GATAGCGA 1.21533104021  
GATAGCGC 1.30738276815  
GATAGCTA 0.512104952122  
GATAGGAA -0.818232354088  
GATAGGAC -1.14411543109  
GATAGGCA -0.357097909589  
GATAGGCC 0.0575428949941  
GATAGGGA 0.53151671712  
GATAGGGC -0.0140611742597

GATAGGTA 1.78107013736  
GATAGTAA 3.06024395495  
GATAGTAC 0.276315897223  
GATAGTCA -0.29706999391  
GATAGTCC 0.496276763071  
GATAGTGA 0.996577606717  
GATAGTGC 1.82124578341  
GATAGTTA 0.951931962832  
GATATAAA 1.72832865956  
GATATAAC 2.97635551059  
GATATAACA 1.78102100736  
GATATACC 2.22658186449  
GATATAGA 3.82811722018  
GATATAGC 1.29415513857  
GATATATA 2.6321379897  
GATATATC 5.71325387008  
GATATCAA 6.15475275824  
GATATCAC 7.48292418062  
GATATCCA 18.576395848  
GATATCCC 14.9198847425  
GATATCGA 7.24780712428  
GATATCGC 14.3286602875  
GATATCTA 14.9544812184  
GATATGAA 2.20989056948  
GATATGAC 3.39766217447  
GATATGCA 5.9189158224  
GATATGCC 5.34555886801  
GATATGGA 5.74482052347  
GATATGGC 5.19840138482  
GATATGTA 5.59249481346  
GATATTAA 3.52050571731  
GATATTAC 4.64028784751  
GATATTCA 4.30831806238  
GATATTCC 9.75302086615  
GATATTGA 1.97429262198  
GATATTGC 7.16765401763  
GATATTTA 6.50630001804  
GATCAAAA 0.748847878579  
GATCAAAC -0.180512385522  
GATCAACA 0.927518721588  
GATCAACC 0.471643894045  
GATCAAGA 1.20851071286  
GATCAAGC 0.539141027882  
GATCAATA 0.846133409402  
GATCAATC -0.195881542102  
GATCACAA 1.75735283514  
GATCACAC 4.98657736395  
GATCACCA 0.119449408869  
GATCACCC 1.29359118439  
GATCACGA 2.2365373524  
GATCACGC 2.39645718735  
GATCACTA 1.39775907961  
GATCAGAA 1.36843450319  
GATCAGAC 0.621446694968

GATCAGCA 0.311641620605  
GATCAGCC -0.187369560384  
GATCAGGA 1.73014168169  
GATCAGGC 0.300509302508  
GATCAGTA 0.872763746256  
GATCATAA 1.12109302701  
GATCATAC 0.987210846167  
GATCATCA 1.51509090195  
GATCATCC 1.50669341813  
GATCATGA 1.42283703319  
GATCATGC 0.894873498024  
GATCATTAA 1.2429429363  
GATCCAAA 2.35707969572  
GATCCAAC 2.44942433009  
GATCCACA 0.945856704506  
GATCCACC 1.58807269315  
GATCCAGA 4.59237755636  
GATCCAGC 0.61417129052  
GATCCATA 1.36324774853  
GATCCATC 0.680883176973  
GATCCCAA 2.21973905391  
GATCCCAC 3.27184231088  
GATCCCCA 3.74783067143  
GATCCCCC 2.51541425527  
GATCCCGA 2.42475232361  
GATCCCGC 1.32494362263  
GATCCCTA 1.56928650302  
GATCCGAA 3.7231467988  
GATCCGAC 1.1962798395  
GATCCGCA 2.18465981326  
GATCCGCC 2.39499785963  
GATCCGGA 4.67224774912  
GATCCGGC 1.06808882859  
GATCCGTA 2.90484199877  
GATCCTAA 2.11611929133  
GATCCTAC 3.6799219697  
GATCCTCA 3.88502538047  
GATCCTCC 6.933971724  
GATCCTGA 2.95380962593  
GATCCTGC 4.11348136562  
GATCCTTA 2.71102245967  
GATCGAAA 0.615571079336  
GATCGAAC 0.173587969167  
GATCGACA -0.560414736836  
GATCGACC -0.726189785982  
GATCGAGA 2.2961233062  
GATCGAGC -0.830180521733  
GATCGATA 1.56107471397  
GATCGATC 0.995191974006  
GATCGCAA 2.96389293513  
GATCGCAC 5.5674622427  
GATCGCCA 2.27177439196  
GATCGCCC 4.57886284933  
GATCGCGA 8.07190135425

GATCGCGC 10.7495216552  
GATCGCTA 2.73683278342  
GATCGGAA 1.30615618343  
GATCGGAC -0.883985372712  
GATCGGCA 0.815645534365  
GATCGGCC 0.288496391507  
GATCGGGA 2.42475232361  
GATCGGGC -0.079266892944  
GATCGGTA 2.30811810572  
GATCGTAA 3.78775858567  
GATCGTAC 2.19064742866  
GATCGTCA 1.85995481551  
GATCGTCC 2.68000352258  
GATCGTGA 2.56688543096  
GATCGTGC 3.74378015225  
GATCGTTA 1.75768383815  
GATCTAAA 2.27773889959  
GATCTAAC 2.65212370142  
GATCTACA 3.47901854991  
GATCTACC 1.30723225546  
GATCTAGA 4.52019725042  
GATCTAGC 2.66710189973  
GATCTATA 3.79123037003  
GATCTCAA 2.96971150999  
GATCTCAC 5.70750336942  
GATCTCCA 7.62507685671  
GATCTCCC 9.37367185193  
GATCTCGA 4.87972959344  
GATCTCGC 6.34748519186  
GATCTCTA 4.4033051  
GATCTGAA 2.05675317349  
GATCTGAC 2.26034625293  
GATCTGCA 4.9598618823  
GATCTGCC 2.45174676377  
GATCTGGA 4.51355408254  
GATCTGGC 2.27076327145  
GATCTGTA 3.71122048984  
GATCTTAA 3.91803012743  
GATCTTAC 3.98009673018  
GATCTTCA 5.83881871563  
GATCTTCC 4.26540591663  
GATCTTGA 5.28162386778  
GATCTTGC 5.25064406815  
GATCTTTA 3.74080695417  
GATGAAAA 0.492272251226  
GATGAAAC -0.783511595949  
GATGAACA -0.116746634005  
GATGAACC -0.404043503924  
GATGAAGA 0.928364756945  
GATGAAGC -0.411702580411  
GATGAATA 1.18173277781  
GATGAATC 2.58848889386  
GATGACAA 0.319746614349  
GATGACAC 0.332164223366



GATGACCA 0.347272324745  
GATGACCC -0.670747823278  
GATGACGA 0.799346446696  
GATGACGC -0.341606344349  
GATGACTA 0.1379849527  
GATGAGAA 1.65754689338  
GATGAGAC -0.215622020149  
GATGAGCA -0.540843507497  
GATGAGCC -0.867219966342  
GATGAGGA 0.524298769798  
GATGAGGC -0.575113560284  
GATGAGTA 0.144274009824  
GATGATAA -0.17086375197  
GATGATAC 2.11615593066  
GATGATCA 1.64743901918  
GATGATCC 2.90622305156  
GATGATGA -0.000203389897722  
GATGATGC 0.110629531902  
GATGATTA 2.39391575043  
GATGCAAA 0.712913234572  
GATGCAAC -0.21008073837  
GATGCACA -0.192504895079  
GATGCACC -0.0037740588084  
GATGCAGA 1.73555659943  
GATGCAGC -0.379552612289  
GATGCATA 0.950749720018  
GATGCATC 0.308625121508  
GATGCCAA -0.481994503784  
GATGCCAC -0.417164546374  
GATGCCCA -0.394302439345  
GATGCCCC 0.555328740325  
GATGCCGA 0.901629082028  
GATGCCGC 0.119746062507  
GATGCCTA 0.301516259453  
GATGCGAA 1.21812791153  
GATGCGAC 0.00290783018566  
GATGCGCA 0.345424536892  
GATGCGCC 0.13641154344  
GATGCGGA 1.59056937181  
GATGCGGC -0.867646939403  
GATGCGTA 1.94666448801  
GATGCTAA 0.438865436567  
GATGCTAC 0.189875815224  
GATGCTCA 0.00998504918563  
GATGCTCC 0.0673401676314  
GATGCTGA 0.636592684742  
GATGCTGC 0.560888341767  
GATGCTTA 1.93381865687  
GATGGAAA -0.0917677731572  
GATGGAAC -0.708764455379  
GATGGACA -0.712282871614  
GATGGACC -1.12610970025  
GATGGAGA 0.235678720564  
GATGGAGC -0.512364966434

GATGGATA 3.08315061207  
GATGGCAA -0.486907504384  
GATGGCAC -0.83577176623  
GATGGCCA -0.842018563222  
GATGGCCC -0.623852399838  
GATGGCGA -0.19739395521  
GATGGCGC -0.604598641936  
GATGGCTA -0.421215273733  
GATGGGAA 1.59327402027  
GATGGGAC -0.78962370178  
GATGGGCA -0.780038354338  
GATGGGCC -0.422115019013  
GATGGGGA -0.49325443499  
GATGGGGC -0.696936198256  
GATGGGTA 1.50738852444  
GATGGTAA 0.790260310078  
GATGGTAC -0.899791911252  
GATGGTCA -0.899616209027  
GATGGTCC -0.201349337049  
GATGGTGA -0.0254876478587  
GATGGTGC -0.916756960316  
GATGGTTA 0.772937611225  
GATGTAAA 0.647770385641  
GATGTAAAC -0.0748945305879  
GATGTACA 0.195669200551  
GATGTACC -0.321302953014  
GATGTAGA 0.914929365728  
GATGTAGC -0.389913214571  
GATGTATA 1.98798969293  
GATGTCAA -0.195124398747  
GATGTCAC 0.693777721769  
GATGTCCA 0.922072368974  
GATGTCCC 0.516125077317  
GATGT CGA -0.395708473499  
GATGT CGC 0.488861463012  
GATGTCTA 1.60229978527  
GATGTGAA -0.0908753141076  
GATGTGAC -0.605186744762  
GATGTGCA -0.755643849113  
GATGTGCC 0.378908093227  
GATGTGGA 0.0317504745558  
GATGTGGC -0.156657685828  
GATGTGTA 2.8180459324  
GATGTTAA 1.97929805361  
GATGTTAC 1.52060074885  
GATGTTCA -0.0237639340889  
GATGTTCC 0.304302930047  
GATGTTGA 1.49996406455  
GATGTTGC 0.280771947131  
GATGTTTA 2.1457829897  
GATTA AAA -0.0918381373184  
GATTA AAC 0.0109503705323  
GATTA ACA 1.33777925305  
GATTA ACC -0.151723034717

GATTAAGA 1.0100331912  
GATTAAGC 0.945184705949  
GATTAATA 2.54346790505  
GATTAATC 0.900946882749  
GATTACAA 7.34878469178  
GATTACAC 11.8125326062  
GATTACCA 11.1083988621  
GATTACCC 12.8155579017  
GATTACGA 15.9283160041  
GATTACGC 14.8593544933  
GATTACTA 7.47961539963  
GATTAGAA 0.35912410598  
GATTAGAC 1.3705693685  
GATTAGCA 0.920367807579  
GATTAGCC 0.576017677301  
GATTAGGA 1.84830038701  
GATTAGGC 0.423586004701  
GATTAGTA 2.61732945645  
GATTATAA 1.87527734022  
GATTATAC 2.37393066325  
GATTATCA 3.32198322921  
GATTATCC 8.72137838307  
GATTATGA 1.96219560707  
GATTATGC 4.52827767916  
GATTATTA 3.56526606727  
GATTCAAA 1.27708121242  
GATTC AAC 0.179246663333  
GATTCACA 2.90448705529  
GATTCACC 2.19602799703  
GATTCAGA 2.42112211579  
GATTCAGC 0.72795097179  
GATTCATA 2.63549923155  
GATTCCAA 3.68895751907  
GATTCACAC 6.36673749252  
GATTCCCA 13.3063010856  
GATTCCCC 22.5365949257  
GATTC CGA 9.47506265275  
GATTC CGC 9.46679049208  
GATTCCTA 6.8498888414  
GATTCGAA 3.82331538662  
GATTCGAC 1.35108932112  
GATTCGCA 11.0548419511  
GATTCGCC 6.58365437977  
GATTCGGA 3.92773996531  
GATTCGGC 3.10486066209  
GATTCGTA 6.42677352714  
GATTCTAA 3.81556929174  
GATTCTAC 5.7347445005  
GATTCTCA 13.2518910612  
GATTCTCC 20.709561586  
GATTCTGA 6.1418359384  
GATTCTGC 10.2107024705  
GATTCTTA 9.54498984828  
GATTGAAA 0.62362215498

GATTGAAC 0.0880792755034  
GATTGACA -0.556986878028  
GATTGACC -0.176540557621  
GATTGAGA 1.04986159636  
GATTGAGC 0.0961111987725  
GATTGATA 2.57837290072  
GATTGCAA 4.40569081979  
GATTGCAC 7.92474782645  
GATTGCCA 5.98220484632  
GATTGCCC 10.9430980424  
GATTGCGA 14.7718772686  
GATTGCGC 16.7732176243  
GATTGCTA 8.19927922193  
GATTGGAA 0.865217710419  
GATTGGAC -0.875310803983  
GATTGGCA 0.680638359655  
GATTGGCC 0.315279739185  
GATTGGGA 1.65914736578  
GATTGGGC 0.0341351534488  
GATTGGTA 1.95185124267  
GATTGTAA 3.33871241261  
GATTGTAC 2.63368308675  
GATTGTCA 2.69639129407  
GATTGTCC 4.10601631102  
GATTGTGA 5.49654349539  
GATTGTGC 5.67666554718  
GATTGTTA 2.59540831394  
GATTTAAA 1.0685976156  
GATTTAAC 1.21243736613  
GATTTACA 2.67813075337  
GATTTACC 2.04934536784  
GATTTAGA 3.46471547283  
GATTTAGC 0.941655880815  
GATTTATA 5.586263838  
GATTTCAA 5.96268316334  
GATTTCAC 11.0342233783  
GATTTCCA 17.531890255  
GATTTCCC 24.2869937832  
GATTTCGA 9.60233393329  
GATTTCGC 14.8256925285  
GATTTCTA 9.53929326572  
GATTTGAA 3.55278288218  
GATTTGAC 2.87237414285  
GATTTGCA 7.07309207947  
GATTTGCC 8.90246950341  
GATTTGGA 3.06537241977  
GATTTGGC 3.00288217481  
GATTTGTA 7.33252390887  
GATTTTAA 4.4615809897  
GATTTTAC 8.2313615322  
GATTTTCA 15.0748249599  
GATTTTCC 12.0056022882  
GATTTTGA 4.13051698702  
GATTTTGC 6.4196796539

GATTTTTA 7.41911637715  
GCAAAAAA 2.41536870064  
GCAAAAAC -0.167261856361  
GCAAAAACA -0.288098563365  
GCAAAAACC -0.0222550600063  
GCAAAAAGA 0.165123452032  
GCAAAAAGC -0.393254887691  
GCAAAAATA 1.67145484864  
GCAAACAA 0.884241639819  
GCAAACAC 0.447645135182  
GCAAACCA 0.30094127184  
GCAAACCC -0.502579976298  
GCAAACGA 0.138045948852  
GCAAACGC -0.47241665075  
GCAAACCTA 0.762547655846  
GCAAAGAA 0.390748424673  
GCAAAGAC -0.959463842566  
GCAAAGCA 0.246612645035  
GCAAAGCC -0.150538501945  
GCAAAGGA -0.15564385901  
GCAAAGGC -1.30390619569  
GCAAAGTA 0.905212449796  
GCAAATAA 1.85462691618  
GCAAATAC 3.4485427492  
GCAAATCA 3.02432409158  
GCAAATCC 9.61646963527  
GCAAATGA 0.662309952925  
GCAAATGC 0.757573450916  
GCAAATTA 0.819662953245  
GCAACAAA 1.48073507983  
GCAACAAC 0.430227090809  
GCAACACA -0.399385313186  
GCAACACC 0.383643101645  
GCAACAGA 0.0467472007095  
GCAACAGC -0.548658717477  
GCAACATA 0.784966968287  
GCAACCAA 0.131950289082  
GCAACCAC -1.015504317  
GCAACCCA 0.195375461405  
GCAACCCC -0.887296651845  
GCAACCGA -0.605805657931  
GCAACCGC -0.480763339142  
GCAACCTA 0.197384795379  
GCAACGAA -0.533021635821  
GCAACGAC -0.825552308626  
GCAACGCA 0.713807775401  
GCAACGCC -0.816752208568  
GCAACGGA -0.0189766729957  
GCAACGGC -0.617389722269  
GCAACGTA 0.845274675187  
GCAACTAA 1.13900382869  
GCAACTAC 0.80913164501  
GCAACTCA 0.397029362856  
GCAACTCC -0.774460433233

GCAACTGA -0.0553961635455  
GCAACTGC -0.125263611994  
GCAACTTA -0.399527290576  
GCAAGAAA 0.00857110426717  
GCAAGAAC -0.426465106324  
GCAAGACA 0.880286466158  
GCAAGACC -0.175790492318  
GCAAGAGA 0.323859795106  
GCAAGAGC -0.505017324223  
GCAAGATA 3.088792652  
GCAAGCAA 0.568680235812  
GCAAGCAC -0.830725531715  
GCAAGCCA -1.05092496954  
GCAAGCCC -1.11071077422  
GCAAGCGA -0.137858796837  
GCAAGCGC 0.377901552638  
GCAAGCTA -1.0099442992  
GCAAGGAA -0.401816207593  
GCAAGGAC -0.162888036759  
GCAAGGCA -0.125605648434  
GCAAGGCC -0.675518013776  
GCAAGGGA -0.74755009698  
GCAAGGGC -1.04405488764  
GCAAGGTA 0.2808062965  
GCAAGTAA 1.99778134476  
GCAAGTAC 0.264444339078  
GCAAGTCA 0.248415466442  
GCAAGTCC -0.884867839218  
GCAAGTGA 0.030147712199  
GCAAGTGC -0.266407873894  
GCAAGTTA 0.644050244932  
GCAATAAA -0.128801805138  
GCAATAAC -0.332531032987  
GCAATACA 1.6762508532  
GCAATACC 1.2522051915  
GCAATAGA 0.672684294955  
GCAATAGC 0.467553821046  
GCAATATA 4.6285341181  
GCAATCAA 7.09880955583  
GCAATCAC 2.7508454522  
GCAATCCA 9.90782264518  
GCAATCCC 6.69816497397  
GCAATCGA 2.76345958124  
GCAATCGC 5.21787206419  
GCAATCTA 12.9559620908  
GCAATGAA -0.0769355076169  
GCAATGAC -0.475492272396  
GCAATGCA 1.01846668981  
GCAATGCC -0.326918554335  
GCAATGGA 0.267848465595  
GCAATGGC -0.517092064087  
GCAATGTA 0.657516446492  
GCAATTAA 1.00692342836  
GCAATTAC 0.692744742575

GCAATTCA 3.24605280493  
GCAATTCC 1.8187799151  
GCAATTGA 0.820399486979  
GCAATTGC 1.69949600774  
GCAATTTA 2.19279769913  
GCACAAAA 1.40461771172  
GCACAAAC 0.11871849594  
GCACAACA 0.0151468224856  
GCACAACC -0.344647824806  
GCACAAGA 0.361098049696  
GCACAAGC -0.209807608845  
GCACAATA 2.02580064518  
GCACACAA 2.18140349312  
GCACACAC -1.05617730027  
GCACACCA -0.859036489495  
GCACACCC -0.759608390783  
GCACACGA -0.464895596272  
GCACACGC -0.136483781203  
GCACACTA -0.171680850587  
GCACAGAA 0.358581594134  
GCACAGAC -1.23314920269  
GCACAGCA -0.302495528725  
GCACAGCC -0.222562674386  
GCACAGGA -0.0468204793625  
GCACAGGC -0.78135861916  
GCACAGTA 0.629353503265  
GCACATAA 0.9450073383  
GCACATAC 0.303842023974  
GCACATCA 0.0730550698548  
GCACATCC -0.071453348388  
GCACATGA 0.491707672512  
GCACATGC 0.137393310848  
GCACATTA 0.391065063398  
GCACCAAA 0.723973523084  
GCACCAAC -1.2746580206  
GCACCACA -0.310943807977  
GCACCACC -0.0888160174154  
GCACCAGA -0.792513628658  
GCACCAGC -0.660798997063  
GCACCATA 0.333323358422  
GCACCCAA -0.135087531414  
GCACCCAC -1.13575583567  
GCACCCCA -0.0645033261408  
GCACCCCC -1.40425527384  
GCACCCGA -1.5197130779  
GCACCCGC -1.05717030929  
GCACCCTA -0.269065057778  
GCACCGAA -0.141686773746  
GCACCGAC -0.926927079736  
GCACCGCA 0.723285286644  
GCACCGCC -0.628364033271  
GCACCGGA 0.367931700446  
GCACCGGC -1.28398626822  
GCACCGTA 0.573414203339

GCACCTAA 0.495277508711  
GCACCTAC -0.991697914596  
GCACCTCA -0.555295223669  
GCACCTCC -0.698800640348  
GCACCTGA -0.548853363899  
GCACCTGC -0.393920849086  
GCACCTTA -0.074377832813  
GCACGAAA 0.653813376379  
GCACGAAC -1.35380021492  
GCACGACA -0.854348321126  
GCACGACC -0.506859907626  
GCACGAGA -0.579097878864  
GCACGAGC -0.945430980513  
GCACGATA 0.398396884082  
GCACGCAA 1.29981300002  
GCACGCAC -0.595999849996  
GCACGCCA -1.10749671421  
GCACGCCC -1.36599902887  
GCACGCGA 0.584301287762  
GCACGCGC 1.45348666252  
GCACGCTA -0.603482599723  
GCACGGAA 0.304799850913  
GCACGGAC -0.999134656987  
GCACGGCA -0.162185644215  
GCACGGCC -0.979369613938  
GCACGGGA 0.851019346863  
GCACGGGC -1.05951168716  
GCACGGTA 0.999534983265  
GCACGTAA 1.71806090467  
GCACGTAC -0.351587229975  
GCACGTCA 0.180926243369  
GCACGTCC -0.148157986612  
GCACGTGA -0.823881888422  
GCACGTGC 0.560551717955  
GCACGTTA -0.178378144752  
GCACTAAA -0.159506185286  
GCACTAAC -0.742622523921  
GCACTACA 0.410597571632  
GCACTACC 0.201579165552  
GCACTAGA 0.161916261894  
GCACTAGC -0.492365931322  
GCACTATA 1.20991882879  
GCACTCAA 0.0583298078021  
GCACTCAC -1.04469087141  
GCACTCCA -0.721774330781  
GCACTCCC -0.950963726994  
GCACTCGA -1.04564474296  
GCACTCGC 1.74984302228  
GCACTCTA -0.191645744508  
GCACTGAA 0.541680383023  
GCACTGAC -0.155416528643  
GCACTGCA -0.305991878093  
GCACTGCC -0.679133649133  
GCACTGGA 0.20344818756



GCACTGGC -1.18350895243  
GCACTGTA 0.874507653291  
GCACTTAA 0.506391298967  
GCACTTAC -0.65319134054  
GCACTTCA -0.104706243509  
GCACTTCC 0.0433761744927  
GCACTTGA -0.437885750939  
GCACTTTA -0.63515729749  
GCAGAAAA 0.380771702607  
GCAGAAAC -1.04879530869  
GCAGAACA -0.426082891531  
GCAGAACC -0.734012906725  
GCAGAAGA -0.603705350174  
GCAGAAGC -0.476385564158  
GCAGAATA 0.328737197269  
GCAGACAA 1.21967529854  
GCAGACAC -0.726925487004  
GCAGACCA -0.37909024897  
GCAGACCC -0.702583234454  
GCAGACGA -0.756141810869  
GCAGACGC -0.139868130812  
GCAGACTA 0.107981091493  
GCAGAGAA 1.40111303524  
GCAGAGAC -0.980126965471  
GCAGAGCA -1.00511998242  
GCAGAGCC -0.379448523293  
GCAGAGGA 0.302252168653  
GCAGAGGC -0.325101785003  
GCAGAGTA 0.064574314836  
GCAGATAA 1.8691972938  
GCAGATAC 3.70849981167  
GCAGATCA 0.924251992545  
GCAGATCC 4.00435987509  
GCAGATGA 0.0407229459907  
GCAGATGC 0.64587575774  
GCAGATTA 2.31969696561  
GCAGCAAA 0.84446902636  
GCAGCAAC -0.684122426522  
GCAGCACA -1.43715051917  
GCAGCACC -0.0552231676345  
GCAGCAGA -1.03319320094  
GCAGCAGC -0.2591849303  
GCAGCATA 0.478735893682  
GCAGCCAA 0.215365128507  
GCAGCCAC -0.146951178795  
GCAGCCCA -0.869967499474  
GCAGCCCC -0.847897926058  
GCAGCCGA -0.498324818151  
GCAGCCGC 0.0906361175953  
GCAGCCTA -0.711952909497  
GCAGCGAA -0.75773270708  
GCAGCGAC -1.31253329984  
GCAGCGCA -0.583953422338  
GCAGCGCC -1.78398338018

GCAGCGGA -0.339501664855  
GCAGCGGC -1.32010327615  
GCAGCGTA 0.685016759173  
GCAGCTAA 1.72824934375  
GCAGCTAC -0.528444218143  
GCAGCTCA -0.244416159047  
GCAGCTCC -0.696329983945  
GCAGCTGA -0.774980461856  
GCAGCTGC 0.33300130707  
GCAGCTTA -0.954666380751  
GCAGGAAA 0.700771253216  
GCAGGAAC -1.33398791547  
GCAGGACA -1.04356400394  
GCAGGACC -1.22497342843  
GCAGGAGA -0.748884934262  
GCAGGAGC -0.41037794385  
GCAGGATA 2.55374440343  
GCAGGCAA -0.146690123594  
GCAGGCAC -1.5091463794  
GCAGGCCA -0.877367394361  
GCAGGCCC -1.90597984677  
GCAGGCCG -0.887058496223  
GCAGGCCG -0.445134092248  
GCAGGCTA -0.838685425399  
GCAGGGAA 0.882442773794  
GCAGGGAC -1.25521419619  
GCAGGGCA -0.787858352412  
GCAGGGCC -1.25099047292  
GCAGGGGA 0.051182224641  
GCAGGGGC -1.20994922278  
GCAGGGTA 0.100276424027  
GCAGGTAA 2.23199095324  
GCAGGTAC -0.43121364631  
GCAGGTCA -0.910410237888  
GCAGGTCC -1.05769366876  
GCAGGTGA -0.406324510177  
GCAGGTTA -0.377490401105  
GCAGTAAA 0.446122521352  
GCAGTAAC -0.190559055393  
GCAGTACA -0.979162685014  
GCAGTACC -0.433511098625  
GCAGTAGA -0.467328364281  
GCAGTAGC -0.190766817028  
GCAGTATA 0.619706326959  
GCAGTCAA 0.348639013259  
GCAGTCAC -0.978101809969  
GCAGTCCA -0.765874756506  
GCAGTCCC -1.14765237517  
GCAGTCGA -0.231522655141  
GCAGTCGC 0.0265093854411  
GCAGTCTA -0.961360552247  
GCAGTGAA 0.284361143883  
GCAGTGAC -0.668712675233  
GCAGTGCA -0.0459935963802

GCAGTGCC -1.33484893964  
GCAGTGGA -0.128777864669  
GCAGTGGC -0.492640518093  
GCAGTGTA -0.0972008023801  
GCAGTTAA 0.868721970551  
GCAGTTAC 0.659043640238  
GCAGTTCA -0.784119475684  
GCAGTTCC -0.946285134812  
GCAGTTGA -0.248986706851  
GCAGTTTA -0.104371701476  
GCATAAAA 1.16759582676  
GCATAAAC -0.364378518487  
GCATAACA 0.134133451679  
GCATAACC -0.0766881921629  
GCATAAGA 2.81288853084  
GCATAAGC -0.59954428848  
GCATAATA 0.866097054256  
GCATACAA 2.11065753355  
GCATACAC 0.462098516778  
GCATACCA -0.622809011745  
GCATACCC -0.522669777014  
GCATACGA 0.252015280271  
GCATACGC -0.931912109921  
GCATACTA 0.215151954244  
GCATAGAA 1.6531226947  
GCATAGAC -0.65984054559  
GCATAGCA 0.377446683727  
GCATAGCC -0.192733266336  
GCATAGGA 0.499687134928  
GCATAGGC -1.04606609522  
GCATAGTA 0.501490580868  
GCATATAA 3.17852319533  
GCATATAC 1.59395309688  
GCATATCA 3.15995871476  
GCATATCC 6.93577496176  
GCATATGA 0.943841957904  
GCATATGC 0.678927761099  
GCATATTA -0.188251194179  
GCATCAAA 0.124004967857  
GCATCAAC -0.770660352176  
GCATCACA 1.00578407021  
GCATCACC -0.394302439345  
GCATCAGA 1.11212804998  
GCATCAGC -0.511422961022  
GCATCATA 0.547736280796  
GCATCCAA 0.304715122471  
GCATCCAC 0.0252438714306  
GCATCCCA -0.354047477479  
GCATCCCC -0.0810536846453  
GCATCCGA -0.296075735822  
GCATCCGC -0.0111872770867  
GCATCCTA -0.104241382054  
GCATCGAA -0.288844881465  
GCATCGAC -0.432284930255

GCATCGCA 1.10952873958  
GCATCGCC -1.42140060504  
GCATCGGA -0.0219294696275  
GCATCGGC -0.370189598942  
GCATCGTA 0.891284093095  
GCATCTAA 1.73555659943  
GCATCTAC 2.33287400793  
GCATCTCA 0.00392103247042  
GCATCTCC -0.273698683513  
GCATCTGA -0.0765861849471  
GCATCTTA -0.614959452396  
GCATGAAA 1.489469812  
GCATGAAC -0.434727274451  
GCATGACA -0.917700214795  
GCATGACC -0.911526071923  
GCATGAGA -0.198732956052  
GCATGAGC -1.17870420439  
GCATGATA 0.460038387373  
GCATGCAA 0.945936228498  
GCATGCAC -0.307116663781  
GCATGCCA -0.643188388048  
GCATGCCC -1.39367754191  
GCATGCGA -0.0595751285474  
GCATGCGC 0.971808172929  
GCATGCTA -1.05153659648  
GCATGGAA 0.555301469008  
GCATGGAC -0.186133607649  
GCATGGCA -0.263079107809  
GCATGGCC -1.5690625035  
GCATGGGA 0.261733861628  
GCATGGGC -1.05483455222  
GCATGGTA 0.313985080255  
GCATGTAA 0.987465031494  
GCATGTAC 0.983215910509  
GCATGTCA 0.2325323184  
GCATGTCC -0.849168852697  
GCATGTGA -0.436692058336  
GCATGTTA -0.293323622774  
GCATTA AA 1.01540730605  
GCATTAAC -0.91133662995  
GCATTACA -0.276355034685  
GCATTACC -0.255863658623  
GCATTAGA 0.165098262495  
GCATTAGC -0.00900994347331  
GCATTATA 2.27750948744  
GCATTCAA 0.122306651802  
GCATTCAC -0.348305095761  
GCATTCCA -0.43948081071  
GCATTC CC -0.744272542682  
GCATTCGA -0.0974685192772  
GCATTCGC 0.961651585079  
GCATTCTA -0.19858702328  
GCATTGAA -0.320000799677  
GCATTGAC -0.419185746494

GCATTGCA -0.345243838395  
GCATTGCC -0.965910906785  
GCATTGGA 0.932923022248  
GCATTGGC -0.84116878066  
GCATTGTA 0.427865727851  
GCATTTAA 2.21774928866  
GCATTTAC 1.04661859961  
GCATTTCA 0.140659415357  
GCATTTCC 1.51722826539  
GCATTTGA 0.336401894561  
GCATTTTA 0.0674007474269  
GCCAAAAA 0.526734452299  
GCCAAAAC -0.0538400330588  
GCCAAACA -1.02512089114  
GCCAAACC -0.292857304073  
GCCAAAGA -0.0979935441719  
GCCAAAGC -0.909493838369  
GCCAAATA -0.382041796534  
GCCAACAA 0.65191645852  
GCCAACAC -0.694580456104  
GCCAACCA -0.587250545368  
GCCAACCC -0.443684757071  
GCCAACGA -0.202955430254  
GCCAACGC -1.14915542027  
GCCAACTA -0.701577318399  
GCCAAGAA 0.013980401199  
GCCAAGAC -1.143249827  
GCCAAGCA -0.725654144009  
GCCAAGCC -1.43957121286  
GCCAAGGA -0.422699582813  
GCCAAGGC -1.01433206672  
GCCAAGTA 0.122801074532  
GCCAATAA 0.706881693623  
GCCAATAC 0.632651250828  
GCCAATCA -0.165955539464  
GCCAATCC -0.353831388724  
GCCAATGA -0.803659894681  
GCCAATTA -0.177046638319  
GCCACAAA 0.63633891577  
GCCACAAC -0.187671210294  
GCCACACA 0.0944328678048  
GCCACACC -0.584130373631  
GCCACAGA -0.348143133283  
GCCACAGC -1.25560328085  
GCCACATA -0.126771653365  
GCCACCAA -0.831191642238  
GCCACCAC -0.620598577831  
GCCACCCA -0.69383559525  
GCCACCCC -1.69392433197  
GCCACCGA -0.841355516319  
GCCACCGC -1.23182748062  
GCCACCTA -0.538545847004  
GCCACGAA 0.315279739185  
GCCACGAC -1.22465949601

GCCACGCA -0.612390119625  
GCCACGCC -1.16087334305  
GCCACGGA -0.399364703565  
GCCACGGC -1.08312011229  
GCCACGTA -0.139864799964  
GCCACTAA 0.193306588525  
GCCACTAC -0.267117344489  
GCCACTCA -0.132949127085  
GCCACTCC -1.45365965843  
GCCACTGA -0.740182261504  
GCCACTTA -0.825680546268  
GCCAGAAA 0.355525124863  
GCCAGAAC -0.574153027031  
GCCAGACA -0.82879613809  
GCCAGACC -1.35911291727  
GCCAGAGA -0.219013864165  
GCCAGAGC -1.68384976625  
GCCAGATA 3.01028873139  
GCCAGCAA -0.680548426763  
GCCAGCAC -0.463558260854  
GCCAGCCA -0.588431330936  
GCCAGCCC -1.74980679931  
GCCAGCGA -0.547273917477  
GCCAGCGC -0.626440468629  
GCCAGCTA -1.42606878833  
GCCAGGAA 0.671676921654  
GCCAGGAC -1.15018090505  
GCCAGGCA -1.14862914631  
GCCAGGCC -1.59458679069  
GCCAGGGA 0.0964967444128  
GCCAGGGC -1.53208467958  
GCCAGGTA -0.000833336500085  
GCCAGTAA -0.256108475941  
GCCAGTAC -1.36801960446  
GCCAGTCA -0.704036316835  
GCCAGTCC -1.198433649  
GCCAGTGA -0.97665372386  
GCCAGTTA 0.320570999195  
GCCATAAA -0.0397361823108  
GCCATAAC -1.33598663237  
GCCATACA -1.06249321235  
GCCATACC -0.227173816898  
GCCATAGA 0.133734166291  
GCCATAGC -1.24692871212  
GCCATATA 0.537226623072  
GCCATCAA -0.491992876361  
GCCATCAC -0.448463274688  
GCCATCCA -0.260055947016  
GCCATCCC -1.13571420007  
GCCATCGA -0.0974560285977  
GCCATCGC -0.723335665718  
GCCATCTA -0.587864670443  
GCCATGAA -0.278313989585  
GCCATGAC -1.22880515254

GCCATGCA -1.71959413557  
GCCATGCC 0.0241367808717  
GCCATGGA 0.648033522622  
GCCATGGC -1.33113733423  
GCCATGTA -0.44256538401  
GCCATTAA 1.0818458548  
GCCATTAC -0.193575762668  
GCCATTCA 0.156225508318  
GCCATTCC -0.0254029194162  
GCCATTGA -0.0878844209033  
GCCATTTA -0.632052114569  
GCCCAAAA 1.41412665784  
GCCCAAAC -0.950299431023  
GCCCAACA -1.47111850569  
GCCCAACC -0.406471275661  
GCCCAAGA -0.244554805589  
GCCCAAGC -1.47322318519  
GCCCAATA -0.435454856532  
GCCCACAA 0.497003304261  
GCCCACAC -1.19386580751  
GCCCACCA -0.838685425399  
GCCCACCC -0.794564181875  
GCCCACGA -0.454907840772  
GCCCACGC -0.940148463978  
GCCCACTA -0.575651284036  
GCCCAGAA -0.217610119968  
GCCCAGAC -0.684314782986  
GCCCAGCA -1.01697530268  
GCCCAGCC -0.869967499474  
GCCCAGGA -0.447165909445  
GCCCAGGC -1.58427198756  
GCCCAGTA -1.23343419836  
GCCCATAA 0.763578136904  
GCCCATAC -0.773137253919  
GCCCATCA -0.990751953802  
GCCCATCC -0.845321098879  
GCCCATGA -0.95380202573  
GCCCATTA 0.093174223668  
GCCCAAAA 0.0850719362377  
GCCCAAAC -0.547876592763  
GCCCCACA -0.912007795795  
GCCCCACC -0.992753377013  
GCCCCAGA 0.00963281202396  
GCCCCAGC -0.871663317393  
GCCCCATA -0.310769562998  
GCCCCCAA -1.32671001289  
GCCCCCAC -1.64273169843  
GCCCCCCA -1.48949396065  
GCCCCCCC -1.62543876903  
GCCCCCGA -1.41872426878  
GCCCCCGC -1.739917512  
GCCCCCTA -1.02525183509  
GCCCCGAA -0.515900661442  
GCCCCGAC -1.09186900056

GCCCCGCA -0.510745549838  
GCCCCGCC 0.126472085235  
GCCCCGGA -1.71448253317  
GCCCCGGC -1.23050763215  
GCCCCGTA -0.851838110904  
GCCCCCTAA -0.767081356145  
GCCCCCTAC -1.25046107628  
GCCCCCTCA -0.924984779075  
GCCCCCTCC -1.16291307102  
GCCCCCTGA -1.44405286866  
GCCCCCTTA -0.237155951592  
GCCCCGAAA -0.0762389440572  
GCCCCGAAC -0.636166128037  
GCCCCGACA -0.944183786166  
GCCCCGACC -1.43319139013  
GCCCCGAGA -1.27252294711  
GCCCCGAGC -1.74307765391  
GCCCCGATA -0.203781272347  
GCCCCGCAA 0.0955920028616  
GCCCCGCA -1.01841631074  
GCCCCGCCA -0.882069302478  
GCCCCGCCC -1.63109829591  
GCCCCGCGA -0.294049331253  
GCCCCGCGC -1.19110557552  
GCCCCGCTA -0.717171099033  
GCCCCGGAA -0.574705739599  
GCCCCGGAC -0.559886589272  
GCCCCGGCA -1.33926397849  
GCCCCGGCC -1.5160212494  
GCCCCGGGA -1.16846288809  
GCCCCGGGC -0.702718758327  
GCCCCGGTA -1.34582241793  
GCCCCGTAA 0.270344103358  
GCCCCGTAC -0.0793949224088  
GCCCCGTCA -1.3779596872  
GCCCCGTCC -1.29837594735  
GCCCCGTGA -1.01961916318  
GCCCCGTTA -0.0494249942145  
GCCCTAAA -0.183889865256  
GCCCTAAC -0.970629885497  
GCCCTACA -0.196807725986  
GCCCTACC -0.75639766162  
GCCCTAGA -1.2161531351  
GCCCTAGC -1.2828277577  
GCCCTATA -1.14121925887  
GCCCTCAA 0.134175711811  
GCCCTCAC -0.754786155788  
GCCCTCCA -1.82683473795  
GCCCTCCC -1.57371236712  
GCCCTCGA -0.653085586121  
GCCCTCGC -1.36895557271  
GCCCTCTA -1.63960715496  
GCCCTGAA -0.276948966495  
GCCCTGAC -1.31370305197



GCCCTGCA -1.15409673307  
GCCCTGCC -1.1675292098  
GCCCTGGA -1.10528274127  
GCCCTGTA -0.163302935496  
GCCCTTAA 0.570948126852  
GCCCTTAC -1.07845775799  
GCCCTTCA -1.0560786239  
GCCCTTCC -1.29074351765  
GCCCTTGA -0.644240103261  
GCCCTTTA -0.623852399838  
GCCGAAAA 0.961198589769  
GCCGAAAC -0.21877487583  
GCCGAACA -0.312039032391  
GCCGAACC -0.0733265339558  
GCCGAAGA 0.253722131624  
GCCGAAGC -0.702522862837  
GCCGAATA 0.246598072576  
GCCGACAA 0.102938812361  
GCCGACAC -0.838564682164  
GCCGACCA -0.847032113792  
GCCGACCC -1.36422451967  
GCCGACGA -1.04829693058  
GCCGACGC -1.61132555027  
GCCGACTA -0.919883793749  
GCCGAGAA -0.681422357971  
GCCGAGAC -1.32440215167  
GCCGAGCA -0.810072193176  
GCCGAGCC -0.73640050011  
GCCGAGGA -0.817510600991  
GCCGAGGC -0.0706743463437  
GCCGAGTA 0.248422128138  
GCCGATAA 0.967518457236  
GCCGATAC 1.07000240069  
GCCGATCA -0.648033106266  
GCCGATCC 1.99611258998  
GCCGATGA -1.06203251446  
GCCGATTA 1.27650789023  
GCCGCAA -0.273915188624  
GCCGCAAC -0.420492271569  
GCCGCACA -0.297560461258  
GCCGCACC -1.11040017265  
GCCGCAGA -0.436902734463  
GCCGCAGC -0.628339051912  
GCCGCATA 0.00336478087706  
GCCGCCAA -0.984818048332  
GCCGCCAC -1.0038498885  
GCCGCCCA -1.12990311961  
GCCGCCCC -0.493413899331  
GCCGCCGA -1.22562752368  
GCCGCCGC -1.27556775842  
GCCGCCTA -0.884832240781  
GCCGCGAA -0.0920359064103  
GCCGCGAC -0.788802439603  
GCCGCGCA -0.942899744314

GCCGCGCC -0.683905088698  
GCCGCGGA 0.0906361175953  
GCCGCGGC 0.46592087288  
GCCGCGTA 0.237696381658  
GCCGCTAA -0.0966424690068  
GCCGCTAC -1.41002680048  
GCCGCTCA -0.316623736298  
GCCGCTCC -0.580617161846  
GCCGCTGA -1.54923771337  
GCCGCTTA -0.802288001717  
GCCGGAAA -0.104241382054  
GCCGGAAC -0.697898188755  
GCCGGACA -0.821244065091  
GCCGGACC -1.46472077966  
GCCGGAGA -0.97856604689  
GCCGGAGC -0.791329512242  
GCCGGATA 1.28339108734  
GCCGGCAA -0.0868714267965  
GCCGGCAC -1.00466344809  
GCCGGCCA -0.846431936642  
GCCGGCCC -0.802700610496  
GCCGGCGA -1.00272676823  
GCCGGCGC -1.09785078697  
GCCGGCTA -1.2177309161  
GCCGGGAA -0.456584298138  
GCCGGGAC -1.53377508487  
GCCGGGCA -1.68234255759  
GCCGGGCC -1.33484893964  
GCCGGGGA -0.734707180327  
GCCGGGTA -0.161936038804  
GCCGGTAA -0.330158012061  
GCCGGTAC -0.844168625518  
GCCGGTCA -0.469627065663  
GCCGGTCC -0.608275273444  
GCCGGTGA -1.01585697051  
GCCGGTTA -0.0730203041302  
GCCGTA AA -0.462018160073  
GCCGTAA C -0.820266253065  
GCCGTACA -0.712519986346  
GCCGTACC -0.339144015066  
GCCGTAGA -1.17322912321  
GCCGTAGC -1.04636087526  
GCCGTATA 0.00869663559607  
GCCGTCAA -0.174749394182  
GCCGTCAC -1.01360781549  
GCCGTCCA -1.35020956093  
GCCGTCCC -0.980223143703  
GCCGT CGA -0.29838942602  
GCCGT CGC -1.1319586691  
GCCGTCTA -1.18862867378  
GCCGTGAA 0.560968073938  
GCCGTGAC -1.02139304784  
GCCGTGCA -1.04459844038  
GCCGTGCC -0.569714464074

GCCGTGGA -0.0787277119459  
GCCGTGTA 0.725366233847  
GCCGTTAA -0.0539851331189  
GCCGTTAC -0.982018262524  
GCCGTTCA 0.403544293101  
GCCGTTC -0.71316533812  
GCCGTTGA -0.595365948012  
GCCGTTTA -0.999550804792  
GCCTAAAA 0.840006106577  
GCCTAAAC -0.300271979598  
GCCTAACA -0.507123252785  
GCCTAACC -0.884938411557  
GCCTAAGA 0.156430771818  
GCCTAAGC -0.463010752736  
GCCTAATA -0.375352413132  
GCCTACAA 0.517274636186  
GCCTACAC -0.698001861395  
GCCTACCA -0.156365820284  
GCCTACCC -0.72587689446  
GCCTACGA -1.10884903844  
GCCTACGC -1.41546087059  
GCCTACTA -0.591424514098  
GCCTAGAA -0.44764222069  
GCCTAGAC -0.932505000841  
GCCTAGCA -0.810021397746  
GCCTAGCC -1.13079391324  
GCCTAGGA -1.1655769166  
GCCTAGGC -1.02457421573  
GCCTAGTA -0.324467466663  
GCCTATAA 1.27727398524  
GCCTATAC 0.00580691689567  
GCCTATCA 0.625420812827  
GCCTATCC 0.382461899721  
GCCTATGA -1.20237820558  
GCCTATTA -0.638307863214  
GCCTCAAA -0.888304233324  
GCCTCAAC -0.343905878444  
GCCTCACA -1.06454772095  
GCCTCACC -0.837118261479  
GCCTCAGA -0.0743559741239  
GCCTCAGC -1.53910298421  
GCCTCATA -0.780145566004  
GCCTCCAA -0.496532405644  
GCCTCCAC -1.19796857937  
GCCTCCCA -0.490775451466  
GCCTCCCC -1.50146294609  
GCCTCCGA -1.31583479461  
GCCTCCGC -1.0686136453  
GCCTCCTA -0.879259524126  
GCCTCGAA -0.345236552166  
GCCTCGAC -1.10175578973  
GCCTCGCA -1.15853258972  
GCCTCGCC -1.37405343536  
GCCTCGGA -0.658177411616

GCCTCGTA -0.428663674092  
GCCTCTAA -0.604112546326  
GCCTCTAC -1.13783220295  
GCCTCTCA 0.304453442735  
GCCTCTCC -0.927790185689  
GCCTCTGA -1.32605258679  
GCCTCTTA -1.45966621802  
GCCTGAAA 0.267079456094  
GCCTGAAC -0.87969857151  
GCCTGACA -0.207069651901  
GCCTGACC -1.12292998961  
GCCTGAGA -0.43948081071  
GCCTGAGC -1.14106062725  
GCCTGATA 0.400487407473  
GCCTGCAA 0.271248428553  
GCCTGCAC -1.56826060188  
GCCTGCCA -1.32918087747  
GCCTGCCC -1.18023139813  
GCCTGCGA -1.15445604829  
GCCTGCGC -0.861368915712  
GCCTGCTA -0.681185035061  
GCCTGGAA -0.793455009536  
GCCTGGAC -1.25718605812  
GCCTGGCA -0.7483378425  
GCCTGGCC -1.17838881473  
GCCTGGGA -0.506956502214  
GCCTGGTA -1.54783334464  
GCCTGTAA 0.718211572634  
GCCTGTAC -0.178533653712  
GCCTGTCA 0.885074976319  
GCCTGTCC 0.0729547280629  
GCCTGTGA -1.50508524315  
GCCTGTTA -0.705602648043  
GCCTTAAA -0.629633502663  
GCCTTAAC -1.10263263543  
GCCTTACA -0.604653809104  
GCCTTACC -0.615086232793  
GCCTTAGA -0.989572000946  
GCCTTAGC -1.81250147506  
GCCTTATA 0.0439638609628  
GCCTTCAA -0.831507240073  
GCCTTCAC -1.09560766911  
GCCTTCCA -1.16807088893  
GCCTTCCC -1.42943669187  
GCCTTCGA -0.873690346497  
GCCTTCGC -0.68593648954  
GCCTTCTA -1.42274564305  
GCCTTGAA -0.972304052905  
GCCTTGAC -0.6708015332  
GCCTTGCA 0.117864549819  
GCCTTGCC -0.271089380567  
GCCTTGGA -0.642378159305  
GCCTTGTA 0.266397048638  
GCCTTTAA -0.0668218044325

GCCTTTAC -0.626264766404  
GCCTTTCA 0.787291483741  
GCCTTTCC -0.976425560781  
GCCTTTGA -0.444021797239  
GCCTTTTA -0.849502353839  
GCGAAAAA 2.00845712852  
GCGAAAAC -0.194731358699  
GCGAAACA 0.0944328678048  
GCGAAACC 0.38812642287  
GCGAAAGA 0.666535133441  
GCGAAAGC -0.111664384697  
GCGAAATA 1.05690488235  
GCGAACAA 0.475555974862  
GCGAACAC -0.574770274776  
GCGAACCA -0.369431414697  
GCGAACCC -0.442099689843  
GCGAACGA -0.576447564854  
GCGAACGC 0.414876253891  
GCGAACTA -0.0676237060559  
GCGAAGAA 0.342782758179  
GCGAAGAC -0.624431551011  
GCGAAGCA -0.488716154774  
GCGAAGCC -1.43789329824  
GCGAAGGA -0.581735910373  
GCGAAGTA -0.0695722520566  
GCGAATAA 1.2548773642  
GCGAATAC 3.08547637659  
GCGAATCA 5.34201297228  
GCGAATCC 11.1791835427  
GCGAATGA 3.69717867613  
GCGAATTA -0.0306858523071  
GCGACAAA 0.607513966529  
GCGACAAC 0.151254634236  
GCGACACA -0.308827470515  
GCGACACC -1.07664202955  
GCGACAGA -0.669659052382  
GCGACAGC -0.5195389882  
GCGACATA -0.076491255783  
GCGACCAA -0.65608938636  
GCGACCAC -0.505215509671  
GCGACCCA -0.564041613805  
GCGACCCC -0.72927456746  
GCGACCGA -0.498666230057  
GCGACCGC -0.847581495511  
GCGACCTA -0.834520616501  
GCGACGAA -0.397704900438  
GCGACGAC -0.367681054144  
GCGACGCA 0.831844696598  
GCGACGCC -0.683228718404  
GCGACGGA -0.071993570276  
GCGACGTA -0.663559020874  
GCGACTAA -0.309457000762  
GCGACTAC 0.0964967444128  
GCGACTCA -0.531383483206

GCGACTCC -0.687429125739  
GCGACTGA 0.0672889558455  
GCGACTTA -1.49367063569  
GCGAGAAA -0.246986949064  
GCGAGAAC -0.66730539201  
GCGAGACA -0.319166422287  
GCGAGACC -0.286768514177  
GCGAGAGA -0.992755250615  
GCGAGAGC -0.467715991701  
GCGAGATA 1.601167297  
GCGAGCAA 0.911164258573  
GCGAGCAC -0.854770922449  
GCGAGCCA -0.995895615617  
GCGAGCCC -0.803853916569  
GCGAGCGA -0.523395693671  
GCGAGCGC -0.0604036769537  
GCGAGCTA -0.448269669156  
GCGAGGAA 1.30610663706  
GCGAGGAC -1.17070392417  
GCGAGGCA -1.01581283678  
GCGAGGCC -1.56864489845  
GCGAGGGA -0.259167859704  
GCGAGGTA -0.590667162565  
GCGAGTAA 0.662074295439  
GCGAGTAC -0.598175518185  
GCGAGTCA -0.779617002083  
GCGAGTCC -0.658035642403  
GCGAGTGA 0.0834394044282  
GCGAGTTA -0.976936013217  
GCGATAAA 1.60446483639  
GCGATAAC 0.256743002459  
GCGATACA 0.341552218072  
GCGATACC 1.15500334823  
GCGATAGA 0.432438773791  
GCGATAGC 0.527082942257  
GCGATATA 2.41324715873  
GCGATCAA 2.32156765304  
GCGATCAC 1.8270489531  
GCGATCCA 4.27737240394  
GCGATCCC 3.0168721522  
GCGATCGA 1.60100533452  
GCGATCGC 8.17398726138  
GCGATCTA 4.93934989662  
GCGATGAA 1.38681995069  
GCGATGAC -0.164937340907  
GCGATGCA 0.767030560715  
GCGATGCC -0.640628631464  
GCGATGGA -0.0850386277591  
GCGATGTA -0.865869723889  
GCGATTAA 1.17099100162  
GCGATTAC 4.81127837987  
GCGATTCA 1.01208082992  
GCGATTCC 1.93126368838  
GCGATTGA 0.440602890084

GCGATTTA 1.20681156409  
GCGCAAAA 2.59998281713  
GCGCAAAC -0.0703633284244  
GCGCAACA 0.94028815141  
GCGCAACC 0.397680543613  
GCGCAAGA 0.151316254922  
GCGCAAGC -0.651929781912  
GCGCAATA 1.54324343628  
GCGCACAA 1.85170034997  
GCGCACAC -0.0494085481532  
GCGCACCA -0.448560285633  
GCGCACCC -0.161669362796  
GCGCACGA -0.0586316658898  
GCGCACGC -0.739393683272  
GCGCACTA -0.280507352904  
GCGCAGAA 0.546766587712  
GCGCAGAC -0.970813498486  
GCGCAGCA -0.475823899937  
GCGCAGCC -1.08972830627  
GCGCAGGA 0.138713783849  
GCGCAGTA -0.367785559496  
GCGCATAA 0.842179901165  
GCGCATAC 0.815591408087  
GCGCATCA 0.239005404869  
GCGCATCC 0.0484717471913  
GCGCATGA -0.572090191313  
GCGCATTA -0.112584323242  
GCGCCAAA 0.897454488763  
GCGCCAAC -0.895661243544  
GCGCCACA -0.283327540155  
GCGCCACC -0.994163158372  
GCGCCAGA -0.792326268466  
GCGCCAGC -1.04423058987  
GCGCCATA -0.722209006428  
GCGCCCAA -0.560688282717  
GCGCCCAC -0.926842559471  
GCGCCCCA -0.335367874477  
GCGCCCCC -1.21564060089  
GCGCCCGA -0.789114914769  
GCGCCCGC -0.733931092774  
GCGCCCTA -0.18448129893  
GCGCCGAA 0.777221081579  
GCGCCGAC -0.717917833488  
GCGCCGCA 1.17434016915  
GCGCCGCC -0.456584298138  
GCGCCGGA -0.650903048058  
GCGCCGTA -0.500145126509  
GCGCCTAA 0.237328739325  
GCGCCTAC -0.248655703844  
GCGCCTCA -0.14339862137  
GCGCCTCC -0.582126868641  
GCGCCTGA -0.220863525619  
GCGCCTTA -0.866373098272  
GCGCGAAA 0.829757920411

GCGCGAAC -0.914954138909  
GCGCGACA 0.237328739325  
GCGCGACC -0.450910198801  
GCGCGAGA -0.2904374431  
GCGCGAGC -1.07148587705  
GCGCGATA 1.3605920219  
GCGCGCAA 2.18944332715  
GCGCGCAC -0.188251194179  
GCGCGCCA -0.52680689824  
GCGCGCCC -0.914475954063  
GCGCGCGA 0.448533847028  
GCGCGCGC 0.680262806559  
GCGCGCTA -0.945634578589  
GCGCGGAA 0.332568921381  
GCGCGGAC -0.363039934001  
GCGCGGCA -1.11435680356  
GCGCGGCC 0.0521048694994  
GCGCGGGA -0.548208844837  
GCGCGGTA 0.284956116583  
GCGCGTAA 0.762503938468  
GCGCGTAC 0.120548380486  
GCGCGTCA -0.0949120935413  
GCGCGTCC -0.99224583907  
GCGCGTGA 0.235217398135  
GCGCGTTA -0.476269609017  
GCGCTAAA 0.918751097297  
GCGCTAAC -0.758545642137  
GCGCTACA -0.440213180884  
GCGCTACC -0.328424513926  
GCGCTAGA -0.768934348448  
GCGCTAGC -0.970610733122  
GCGCTATA 0.576128427993  
GCGCTCAA 1.10051296712  
GCGCTCAC -0.904847930133  
GCGCTCCA -0.578181062989  
GCGCTCCC 0.246722563015  
GCGCTCGA -1.39930167853  
GCGCTCTA -0.580441459621  
GCGCTGAA 1.37277147529  
GCGCTGAC -0.567456981934  
GCGCTGCA -0.188455833144  
GCGCTGCC -1.27966470129  
GCGCTGGA 0.570852364975  
GCGCTGTA -0.194744265734  
GCGCTTAA 0.627788629302  
GCGCTTAC -1.02734131759  
GCGCTTCA 0.135839053964  
GCGCTTCC -0.39423249154  
GCGCTTGA -0.0639562343791  
GCGCTTTA -0.0936975831387  
GCGGAAAA 1.16958642471  
GCGGAAAC -0.473078656763  
GCGGAAACA -0.624227744757  
GCGGAAACC -1.4293238594



GCGGAAGA -0.713923522365  
GCGGAAGC -0.382093216498  
GCGGAATA 1.29704756358  
GCGGACAA 0.7302115766  
GCGGACAC -1.03722810677  
GCGGACCA -1.14157899044  
GCGGACCC -0.505395791811  
GCGGACGA -0.517899170161  
GCGGACGC -0.518093400227  
GCGGACTA -0.796242512843  
GCGGAGAA 0.402237143492  
GCGGAGAC -1.11857344878  
GCGGAGCA -0.0449635316781  
GCGGAGCC -0.581617665273  
GCGGAGGA -0.712813100958  
GCGGAGTA -0.355105438032  
GCGGATAA 1.4940574304  
GCGGATAC 3.2761024653  
GCGGATCA 1.61587423939  
GCGGATCC 2.9188003331  
GCGGATGA -0.725176375519  
GCGGATTA 2.65979485223  
GCGGCAAA 0.875263963935  
GCGGCAAC -0.754396446588  
GCGGCACA -0.35248947339  
GCGGCACC -1.24718643648  
GCGGCAGA -0.576634716868  
GCGGCAGC -0.893133130015  
GCGGCATA 0.390957851733  
GCGGCCAA -0.587250545368  
GCGGCCAC -1.44826118676  
GCGGCCCA -1.33624040134  
GCGGCCCC -1.31157588926  
GCGGCCGA -0.923316857007  
GCGGCCGC -0.344117387283  
GCGGCCTA -0.523006400827  
GCGGCGAA 0.356851218669  
GCGGCGAC -1.49963472697  
GCGGCGCA 1.33502755636  
GCGGCGCC -0.628298040848  
GCGGCGGA -1.26307499715  
GCGGCGTA -0.246079501199  
GCGGCTAA -0.4360510783  
GCGGCTAC -0.642067349563  
GCGGCTCA -1.28668529588  
GCGGCTCC -1.27234183226  
GCGGCTGA -0.485002675761  
GCGGCTTA -1.15286202941  
GCGGAAA -0.386474114151  
GCGGGAAC -0.439640691408  
GCGGGACA -0.170450310479  
GCGGGACC -0.73640050011  
GCGGGAGA -0.0749632293251  
GCGGGAGC -0.458315714493

GCGGGATA 2.10740579332  
GCGGGCAA -0.385592272179  
GCGGGCAC -1.125955024  
GCGGGCCA -1.16139045719  
GCGGGCCC -1.49780192793  
GCGGGCGA -1.11597372202  
GCGGGCTA -0.0835022741816  
GCGGGGAA 0.693360116718  
GCGGGGAC -1.00498487491  
GCGGGGCA -0.0178743705305  
GCGGGGCC -1.09675119082  
GCGGGGGA -0.237100576246  
GCGGGGTA -0.0112836634968  
GCGGGTAA 1.19190997528  
GCGGGTAC -0.521675727105  
GCGGGTCA -0.592098594435  
GCGGGTCC -0.824583448253  
GCGGGTGA -1.01276760912  
GCGGGTTA 0.515183904617  
GCGGTAAC 0.431623548776  
GCGGTAAA 0.329534518977  
GCGGTACA 0.0880155730379  
GCGGTACC 0.241190441068  
GCGGTAGA -0.23559003674  
GCGGTAGC 0.0298498094932  
GCGGTATA 0.244587489534  
GCGGTCAA 0.0521048694994  
GCGGTCAC -0.965226001193  
GCGGTCCA -1.24510923648  
GCGGTCCC -1.23555220124  
GCGGTCGA -0.783009054277  
GCGGTCTA -0.594887763165  
GCGGTGAA 0.8124329316  
GCGGTGAC -0.992753377013  
GCGGTGCA 0.134211934782  
GCGGTGCC -0.795274068826  
GCGGTGGA -1.12051304313  
GCGGTGTA 1.31673412353  
GCGGTTAA -0.391484750229  
GCGGTTAC -0.269154157958  
GCGGTTCA -0.10650344411  
GCGGTTCC -0.430323893575  
GCGGTTGA -0.739510679303  
GCGGTTTA -0.491321710516  
GCGTAAAA 1.51244391879  
GCGTAAAC -0.125193039655  
GCGTAACA 0.56891984868  
GCGTAACC 0.778177867628  
GCGTAAGA 0.555106822586  
GCGTAAGC -0.997810436783  
GCGTAATA 2.44237125974  
GCGTACAA 0.44065722454  
GCGTACAC -0.779789581638  
GCGTACCA -0.0175425348121

GCGTACCC 0.268704909852  
GCGTACGA -0.209134777577  
GCGTACGC -0.289402590304  
GCGTACTA 0.21933050289  
GCGTAGAA 0.149382697736  
GCGTAGAC -0.841499367311  
GCGTAGCA 0.742894404378  
GCGTAGCC -0.484575078167  
GCGTAGGA 0.00995715333476  
GCGTAGTA 0.723234074858  
GCGTATAA 0.851670527621  
GCGTATAC 2.24446726845  
GCGTATCA 2.49196425359  
GCGTATCC 9.02690852238  
GCGTATGA -0.267401715625  
GCGTATTA 1.22387299956  
GCGTCAAA 0.78132655975  
GCGTCAAC -0.0776961899979  
GCGTCACA 0.137713904955  
GCGTCACC -0.578725448437  
GCGTCAGA 0.0680296531393  
GCGTCAGC -1.03694810737  
GCGTCATA -0.101462205867  
GCGTCCAA -0.327177319579  
GCGTCCAC 0.266834638776  
GCGTCCCA -0.819744559018  
GCGTCCC -0.349674490589  
GCGTCCGA -0.82686299726  
GCGTCCTA -1.03326148332  
GCGTCGAA -0.620161404049  
GCGTCGAC -0.367193501288  
GCGTCGCA 0.831844696598  
GCGTCGCC 0.0850550738204  
GCGTCGGA -0.950884203001  
GCGTCGTA 0.0708512976365  
GCGTCTAA 0.352596060522  
GCGTCTAC 0.259966846836  
GCGTCTCA -0.981161401911  
GCGTCTCC -1.11111047596  
GCGTCTGA -0.221339420508  
GCGTCTTA -0.84078219413  
GCGTGAAA 1.51720786395  
GCGTGAAC -1.00593978735  
GCGTGACA -0.668248854668  
GCGTGACC -0.989426692708  
GCGTGAGA -1.04656801236  
GCGTGAGC -1.0695822975  
GCGTGATA 1.35881522274  
GCGTGCAA -0.376371236222  
GCGTGCAC -0.714255358083  
GCGTGCCA -1.33305860892  
GCGTGCCC -0.769264102387  
GCGTGCGA -0.0771940646824  
GCGTGCTA -0.143946545844

GCGTGGAA 0.316715334614  
GCGTGGAC -0.464266482381  
GCGTGGCA 0.475625922667  
GCGTGGCC -0.972304052905  
GCGTGGGA -0.342108469665  
GCGTGGTA 0.941436669389  
GCGTGTAA 0.474418490316  
GCGTGTAC -0.163476764119  
GCGTGTCA 1.19167286055  
GCGTGTCC -0.320806032148  
GCGTGTGA -0.389483951553  
GCGTGTTA 0.519944727105  
GCGTTAAA 1.1434967261  
GCGTTAAC -0.595717976995  
GCGTTACA 0.233931066325  
GCGTTACC 0.682197612812  
GCGTTAGA 0.40404392028  
GCGTTAGC -0.690341119485  
GCGTTATA 0.316314175625  
GCGTTCAA -1.12320644998  
GCGTTCAC -0.970813498486  
GCGTTCCA -1.30873925594  
GCGTTCCC -0.524696806118  
GCGTTCGA -0.204944154607  
GCGTTCTA -0.765044750854  
GCGTTGAA 0.181086956778  
GCGTTGAC -0.35725633304  
GCGTTGCA 1.30758032907  
GCGTTGCC -0.640132126954  
GCGTTGGA 0.253609507331  
GCGTTGTA 0.445430121352  
GCGTTTAA -0.00389355297554  
GCGTTTAC -0.264995594399  
GCGTTTCA 1.4686657526  
GCGTTTCC 0.15780183207  
GCGTTTGA 0.453619427183  
GCGTTTTA 0.0824769975734  
GCTAAAAA 0.508300499327  
GCTAAAAC -0.338875257278  
GCTAAACA -0.216265081964  
GCTAAACC -0.832670746868  
GCTAAAGA 0.533107613332  
GCTAAAGC -0.745532435886  
GCTAAATA 0.933817979434  
GCTAACAA 1.79508343068  
GCTAACAC -0.359893948193  
GCTAACCA -0.641371826893  
GCTAACCC -1.11507251949  
GCTAACGA 0.130606708325  
GCTAACTA 0.984510777616  
GCTAAGAA 0.849864167188  
GCTAAGAC -0.458141261337  
GCTAAGCA -1.27603366076  
GCTAAGCC -0.210550804275

GCTAAGGA -0.792892096247  
GCTAAGTA 0.913456714616  
GCTAATAA 0.933901875164  
GCTAATAC 0.751445523558  
GCTAATCA -0.344302041162  
GCTAATCC -0.29928084418  
GCTAATGA 0.0364561298763  
GCTAATTA 0.033049297045  
GCTACAAA -0.524519438469  
GCTACAAC 0.350354816265  
GCTACACA -0.0616771017279  
GCTACACC -0.277773559519  
GCTACAGA -0.149962473443  
GCTACAGC -1.26902347508  
GCTACATA -0.0485473158022  
GCTACCAA -0.40764061144  
GCTACCAC -1.04001894092  
GCTACCCA -0.861848557805  
GCTACCCC -0.794042071472  
GCTACCGA -0.648703439399  
GCTACCTA -0.389711073742  
GCTACGAA 1.00389985121  
GCTACGAC -1.43285747263  
GCTACGCA -0.513214332639  
GCTACGCC -0.622933085828  
GCTACGGA -0.311676178151  
GCTACGTA -0.42011068131  
GCTACTAA -0.0833736201829  
GCTACTAC -1.09675119082  
GCTACTCA -0.873516517874  
GCTACTCC -0.550265227037  
GCTACTGA -0.462651437523  
GCTACTTA -0.227554366267  
GCTAGAAA 0.152307598517  
GCTAGAAC -0.458416264463  
GCTAGACA -0.409755908012  
GCTAGACC -1.36182193747  
GCTAGAGA -0.953643810457  
GCTAGAGC -1.48867915199  
GCTAGATA 1.42460592158  
GCTAGCAA -0.230384962418  
GCTAGCAC -0.059586370159  
GCTAGCCA -0.573055720838  
GCTAGCCC -1.53038927802  
GCTAGCGA -0.0663708909028  
GCTAGCTA -0.699602125616  
GCTAGGAA 1.00158095657  
GCTAGGAC -1.25392682349  
GCTAGGCA -1.25641413413  
GCTAGGCC -1.24576083359  
GCTAGGGA -0.711952909497  
GCTAGGTA 1.5562928655  
GCTAGTAA -0.731094459462  
GCTAGTAC -1.03168828223

GCTAGTCA 0.421856670125  
GCTAGTCC -1.33521991282  
GCTAGTGA -1.17566272393  
GCTAGTTA 1.53491631662  
GCTATAAA 0.415499538798  
GCTATAAC 0.39176662323  
GCTATACA 0.205713164108  
GCTATACC -1.08361536773  
GCTATAGA -0.0500293349239  
GCTATAGC -0.658331255151  
GCTATATA 1.31891999244  
GCTATCAA -0.256133249122  
GCTATCAC -0.112782092334  
GCTATCCA 1.16329362038  
GCTATCCC 0.220560210286  
GCTATCGA 0.184390949682  
GCTATCTA 0.883454935189  
GCTATGAA 0.947007928799  
GCTATGAC -0.549943800218  
GCTATGCA -0.191999230738  
GCTATGCC -0.199153891951  
GCTATGGA 0.63993352515  
GCTATGTA 1.46596693311  
GCTATTAA -0.218437211128  
GCTATTAC 0.196176738494  
GCTATTCA -0.812689615063  
GCTATTCC 0.375748992206  
GCTATTGA 0.830014395696  
GCTATTTA -0.233776806434  
GCTCAAAA 0.607626174467  
GCTCAAAC -0.192037535488  
GCTCAACA -0.660276470304  
GCTCAACC -0.720443032525  
GCTCAAGA -0.547859522167  
GCTCAAGC -0.256402631443  
GCTCAATA -0.192232598267  
GCTCACAA 1.48930326961  
GCTCACAC -1.67499658081  
GCTCACCA -0.700509781659  
GCTCACCC -1.31407777236  
GCTCACGA -0.382169409642  
GCTCACTA -0.47760736079  
GCTCAGAA -0.365645489743  
GCTCAGAC -0.598324157271  
GCTCAGCA -1.38981250932  
GCTCAGCC -0.683893847087  
GCTCAGGA -0.619040990098  
GCTCAGTA -0.353760191851  
GCTCATAA 0.681049303011  
GCTCATAC -0.814935231058  
GCTCATCA -1.2500059992  
GCTCATCC -1.39651146891  
GCTCATGA -0.342249822521  
GCTCATT A 0.610720323955

GCTCCAAA 0.308523530648  
GCTCCAAC -0.642238055516  
GCTCCACA -0.600573936826  
GCTCCACC -1.16430661449  
GCTCCAGA -0.541813408759  
GCTCCAGC -1.22838962927  
GCTCCATA -0.707273484603  
GCTCCCAA -0.477803048102  
GCTCCCAC -0.98515612939  
GCTCCCCA -0.503897326628  
GCTCCCCC -0.709105034573  
GCTCCCGA -0.545276449648  
GCTCCCTA -1.28436161314  
GCTCCGAA -0.663478247814  
GCTCCGAC -1.24648279487  
GCTCCGCA -0.194941202114  
GCTCCGCC -0.44709387986  
GCTCCGGA -1.17256586813  
GCTCCGTA 0.0874624441145  
GCTCCTAA -0.363768973327  
GCTCCTAC -1.03834477351  
GCTCCTCA -1.01657913997  
GCTCCTCC -1.57186666105  
GCTCCTGA -1.03091406828  
GCTCCTTA -0.0874845109816  
GCTCGAAA -0.515981642681  
GCTCGAAC -0.967541356815  
GCTCGACA -1.04809437339  
GCTCGACC -1.32336750705  
GCTCGAGA -0.310312612307  
GCTCGAGC -0.152009487634  
GCTCGATA 0.657209592133  
GCTCGCAA -0.673650240836  
GCTCGCAC -0.750321986937  
GCTCGCCA -0.560249859867  
GCTCGCCC -1.37094575431  
GCTCGCGA -0.200117339696  
GCTCGCTA -0.02000132507  
GCTCGGAA 1.09021731637  
GCTCGGAC -0.689323545462  
GCTCGGCA -1.15386440644  
GCTCGGCC -0.973143842923  
GCTCGGGA -0.672481945947  
GCTCGGTA 0.518973368597  
GCTCGTAA -0.332466081453  
GCTCGTAC -1.39657246506  
GCTCGTCA -0.834492304294  
GCTCGTCC -0.970095700771  
GCTCGTGA -1.13611723266  
GCTCGTTA 1.79795024981  
GCTCTAAA -0.482489967404  
GCTCTAAC -1.21579028086  
GCTCTACA 0.18540789917  
GCTCTACC -1.13740252358

GCTCTAGA -0.738726889165  
GCTCTATA -0.329109835874  
GCTCTCAA -0.592628199245  
GCTCTCAC -1.02694473852  
GCTCTCCA -1.18592111082  
GCTCTCCC -1.43441547672  
GCTCTCGA 0.135155397439  
GCTCTCTA -0.483958246778  
GCTCTGAA 0.115468837493  
GCTCTGAC -1.33214304211  
GCTCTGCA -0.715740499875  
GCTCTGCC -0.589971639895  
GCTCTGGA -0.758018951818  
GCTCTGTA -0.456998572341  
GCTCTTAA 0.358449609288  
GCTCTTAC -1.01961312601  
GCTCTTCA -0.382297230929  
GCTCTTCC -0.464643284546  
GCTCTTGA -1.26873369131  
GCTCTTTA -0.364211351559  
GCTGAAAA 2.27551430957  
GCTGAAAC -0.166000297732  
GCTGAACA -0.955891300053  
GCTGAACC -0.902064382208  
GCTGAAGA 0.307041303348  
GCTGAAGC -1.10887714247  
GCTGAATA 0.120603547654  
GCTGACAA -0.491163495243  
GCTGACAC -0.807499945912  
GCTGACCA -0.387716104049  
GCTGACCC -0.970900933242  
GCTGACGA -0.490230857841  
GCTGACTA -0.616945262258  
GCTGAGAA 1.16200687222  
GCTGAGAC -1.34599812016  
GCTGAGCA -1.07088840622  
GCTGAGCC -0.511579302694  
GCTGAGGA -0.315171902985  
GCTGAGTA -0.268527125847  
GCTGATAA 2.49971971649  
GCTGATAC 1.82413924932  
GCTGATCA -0.0247769281956  
GCTGATCC 0.436703091769  
GCTGATGA -0.13203647477  
GCTGATTA 1.54329027633  
GCTGCAAA -0.138036580842  
GCTGCAAC -0.147902552217  
GCTGCACA -0.665119523099  
GCTGCACC -0.265623875578  
GCTGCAGA -0.0336398980069  
GCTGCAGC 0.112849958359  
GCTGCATA -0.950911890674  
GCTGCCAA -0.206707005839  
GCTGCCAC -1.05128178662



GCTGCCCA -0.756317721271  
GCTGCCCC -0.93478746434  
GCTGCCGA -0.864927926655  
GCTGCCTA 0.629908297612  
GCTGCGAA 0.467122892603  
GCTGCGAC -0.544940034014  
GCTGCGCA -0.780947051271  
GCTGCGCC -0.539525948988  
GCTGCGGA -0.238955025795  
GCTGCGTA 0.368888902851  
GCTGCTAA -0.0453661479137  
GCTGCTAC -1.16156324492  
GCTGCTCA -1.24130832271  
GCTGCTCC -0.67930393873  
GCTGCTGA 0.209461825201  
GCTGCTTA -0.568749350905  
GCTGGAAA 0.117725903277  
GCTGGAAC -0.691097638306  
GCTGGACA -0.0644235939701  
GCTGGACC -1.33054839869  
GCTGGAGA -0.264880055614  
GCTGGATA 1.32812603958  
GCTGGCAA 0.309136406655  
GCTGGCAC -1.33209141397  
GCTGGCCA -0.751753418807  
GCTGGCCC -1.39931375285  
GCTGGCGA -0.142730370017  
GCTGGCTA -0.806487784518  
GCTGGGAA 0.459601213591  
GCTGGGAC -0.841004320047  
GCTGGGCA -0.729524797406  
GCTGGGCC -1.35377981348  
GCTGGGGA -0.995054576531  
GCTGGGTA -0.0479152874199  
GCTGGTAA 1.02786259528  
GCTGGTAC -0.37972664909  
GCTGGTCA -0.626052424853  
GCTGGTCC -0.855291783783  
GCTGGTGA -0.56424937544  
GCTGGTTA -0.0895219489846  
GCTGTAAA -0.00224290968072  
GCTGTAAAC 0.483629533729  
GCTGTACA -0.4295584231  
GCTGTACC -0.437819966694  
GCTGTAGA -0.111398957758  
GCTGTATA 0.449254351056  
GCTGTCAA 0.0640059889191  
GCTGTCAC -1.05352990075  
GCTGTCCA 0.0061697711349  
GCTGTCCC -1.18221262808  
GCTGTCGA 0.0279718358316  
GCTGTCTA -0.0866428473618  
GCTGTGAA 2.00471450459  
GCTGTGAC -0.665847313357

GCTGTGCA 0.336100452829  
GCTGTGCC -0.258263950865  
GCTGTGGA 0.0201166556773  
GCTGTGTA -0.128376289323  
GCTGTTAA 0.732316464272  
GCTGTTAC -0.66760704192  
GCTGTTC A -0.877996924607  
GCTGTTC C 0.397922238261  
GCTGTTC G 0.0813830222279  
GCTGTTC T -0.587402098946  
GCTTAAAA 1.28811381326  
GCTTAAAC 0.520988323377  
GCTTAAAC A -1.04124136209  
GCTTAAAC C -0.746846455369  
GCTTAAAG A 0.09671366588  
GCTTAAAG C -0.0998942092345  
GCTTAAAT A 0.549131489695  
GCTTACAA 1.72283900593  
GCTTACAC -0.861091622627  
GCTTACCA 0.230901660193  
GCTTACCC -1.32227415624  
GCTTACG A -0.207894453103  
GCTTACT A -0.720076847438  
GCTTAGAA 0.588043703516  
GCTTAGAC -0.966060378583  
GCTTAGCA -0.0929452278773  
GCTTAGCC -0.0495680124947  
GCTTAGG A 0.272403608228  
GCTTAGT A -0.588176104718  
GCTTATA A 2.63557084478  
GCTTATAC 0.295086890363  
GCTTATCA 0.268784225667  
GCTTATCC 0.32154173317  
GCTTATG A -0.351689029013  
GCTTATTA 0.44459907481  
GCTTCAA A 0.228246141733  
GCTTCAAC -0.107067398289  
GCTTCACA -0.488361419477  
GCTTCACC -0.943421854717  
GCTTCAGA -0.332531032987  
GCTTCATA -0.340530480489  
GCTTCCAA -0.736181913219  
GCTTCCAC -1.44391713661  
GCTTCCCA -0.0745445833842  
GCTTCCCC -1.00003606769  
GCTTCCGA 0.409059136274  
GCTTCCT A -0.772631173221  
GCTTCGAA 0.172226901459  
GCTTCGAC -0.929197052556  
GCTTCGCA -0.528604931553  
GCTTCGCC -0.908214584612  
GCTTCGGA -0.607716107359  
GCTTCGTA 0.189875815224  
GCTTCTAA 0.140667117943

GCTTCTAC -0.308181910564  
GCTTCTCA -0.559976313986  
GCTTCTCC -0.948271569207  
GCTTCTGA -0.068503882604  
GCTTCTTA -0.0639331266221  
GCTTGAAA -0.251554374198  
GCTTGAAC -0.420876359963  
GCTTGACA 0.386723095029  
GCTTGACC -1.2484074004  
GCTTGAGA -0.507650151282  
GCTTGATA 0.285604799204  
GCTTGCAA 0.711500746899  
GCTTGCAC -0.271036503357  
GCTTGCCA -1.11390006105  
GCTTGCCC -1.6111342347  
GCTTGCGA 0.0561310318556  
GCTTGCTA -0.997922852899  
GCTTGGAA 1.05767076918  
GCTTGGAC 0.223563802347  
GCTTGGCA -1.01921633876  
GCTTGGCC -0.935689499577  
GCTTGGGA -0.565709535873  
GCTTGGTA -0.508586744066  
GCTTGTAA 0.225610816538  
GCTTGTAC -0.912642738669  
GCTTGTCA 0.193602617629  
GCTTGTCC -0.400683511141  
GCTTGTGA -0.243489975162  
GCTTGTTA -0.197080855511  
GCTTTAAA 0.0195029469583  
GCTTTAAC -0.442207109687  
GCTTTACA -0.151001281621  
GCTTTACC -0.159891939105  
GCTTTAGA 0.127756751621  
GCTTTATA 1.17264539212  
GCTTTCAA 0.665057486058  
GCTTTCAC -0.583955087762  
GCTTTCCA -0.680115832897  
GCTTTCCC -0.938026089354  
GCTTTCGA -0.263457783576  
GCTTTCTA -0.69526494534  
GCTTTGAA -0.316764048264  
GCTTTGAC -0.0810832459201  
GCTTTGCA 0.401223316673  
GCTTTGCC 0.161868380956  
GCTTTGGA -0.363171502492  
GCTTTGTA -0.519046439072  
GCTTTTAA 1.25455073293  
GCTTTTAC -0.740245963969  
GCTTTTCA 0.321055845738  
GCTTTTCC -0.034768639077  
GCTTTTGA 0.201579165552  
GCTTTTTA -0.0209014867054  
GGAAAAAA -0.0813076617949

GGAAAAAC -0.302219484708  
GGAAAACA -0.522979337688  
GGAAAACC -0.315209999558  
GGAAAAGA 0.295653967211  
GGAAAATA 1.31389374302  
GGAAACAA 0.370022223837  
GGAAACAC 1.06322079443  
GGAAACCA -0.0352128909109  
GGAAACCC -0.803853916569  
GGAAACGA 0.232071204149  
GGAAACTA 0.360722912955  
GGAAAGAA -0.251485259105  
GGAAAGAC -1.24567672968  
GGAAAGCA -0.517796954767  
GGAAAGCC -0.946929653874  
GGAAAGGA -0.55629322896  
GGAAAGTA -0.354067878922  
GGAAATAA 1.9838867129  
GGAAATAC 1.18185497829  
GGAAATCA 9.85215834838  
GGAAATCC 24.9786489222  
GGAAATGA -0.0826512425523  
GGAAATTA 3.38392346792  
GGAACAAA -0.00617372651674  
GGAACAAC 0.191649491712  
GGAACACA 0.208145932117  
GGAACACC -0.900742035606  
GGAACAGA 1.20057205333  
GGAACATA 0.241400909017  
GGAACCAA -0.288763067514  
GGAACCAC 0.0752909014838  
GGAACCCA -1.08721351613  
GGAACCCC -1.33439927518  
GGAACCGA -0.400159735314  
GGAACCTA -0.854700974643  
GGAACGAA -0.325629516212  
GGAACGAC -1.39526219278  
GGAACGCA -0.983864176775  
GGAACGCC -1.64578421232  
GGAACGGA -0.695027830608  
GGAACGTA -0.415525352869  
GGAACTAA -0.178283423766  
GGAACTAC 0.170586042529  
GGAACTCA -0.457526928084  
GGAACTCC -1.06257356906  
GGAACTGA -0.096786111821  
GGAACTTA 0.423535833805  
GGAAGAAA -0.0772419456204  
GGAAGAAC -0.614052629065  
GGAAGACA -0.203622016183  
GGAAGACC -1.6788114425  
GGAAGAGA 0.490329117853  
GGAAGATA 1.41220330138  
GGAAGCAA -0.35141569131

GGAAGCAC -0.65256639021  
GGAAGCCA -0.888370433925  
GGAAGCCC -1.01657268645  
GGAAGCGA -0.628160851551  
GGAAGCTA -0.959222147918  
GGAAGGAA -0.571685076942  
GGAAGGAC -1.23138531057  
GGAAGGCA -1.26409465295  
GGAAGGCC -1.11902290506  
GGAAGGGA -1.25461235361  
GGAAGGTA -0.140052992868  
GGAAGTAA 0.359286276636  
GGAAGTAC -0.00212175008965  
GGAAGTCA -0.177977610297  
GGAAGTCC -1.31472270778  
GGAAGTGA 0.515668959337  
GGAAGTTA -0.506999595058  
GGAATAAA 0.742782404618  
GGAATAAC 1.0835144014  
GGAATACA 0.910972734821  
GGAATACC 1.03912877183  
GGAATAGA 0.586348093775  
GGAATATA 2.89091447478  
GGAATCAA 4.08136054242  
GGAATCAC 4.04171221122  
GGAATCCA 10.999450992  
GGAATCCC 5.78644217385  
GGAATCGA 5.02411227218  
GGAATCTA 14.7093435144  
GGAATGAA -0.742777824702  
GGAATGAC -0.507027907265  
GGAATGCA 0.994877625238  
GGAATGCC -0.584948096782  
GGAATGGA 0.165842290637  
GGAATGTA 0.390747591961  
GGAATTAA 1.22051175771  
GGAATTAC 1.65041950348  
GGAATTCA 0.580446872249  
GGAATTCC 1.69860875314  
GGAATTGA 1.50757005565  
GGAATTTA 1.61559153368  
GGACAAAA 2.06588719105  
GGACAAAC -0.215295597058  
GGACAACA 0.358276197021  
GGACAACC -0.507398047734  
GGACAAGA 0.868822104165  
GGACAATA 0.329781209897  
GGACACAA 0.0557833746097  
GGACACAC -0.0567876252409  
GGACACCA -0.704496598374  
GGACACCC -0.864794484563  
GGACACGA 0.552237921685  
GGACACTA -0.718622932346  
GGACAGAA -0.105137796485

GGACAGAC -0.54877446444  
GGACAGCA -0.81419911368  
GGACAGCC -1.48749253744  
GGACAGGA 0.254648315508  
GGACAGTA -0.170489864297  
GGACATAA -0.728614435049  
GGACATAC -0.754597338349  
GGACATCA 0.194816711675  
GGACATCC 0.0434802634884  
GGACATGA -0.803011628415  
GGACATTA 0.752558859456  
GGACAAA 0.153247938505  
GGACCAAC -0.183610074035  
GGACCACA -0.784726522707  
GGACCACC -1.40204463175  
GGACCAGA -0.340563788968  
GGACCATA -0.725017119355  
GGACCCAA -0.768198022892  
GGACCCAC -1.21460928712  
GGACCCCA -1.06442198144  
GGACCCCC -1.59779689532  
GGACCCGA 0.130692269479  
GGACCCTA -1.22515891502  
GGACCGAA -1.19410021593  
GGACCGAC -1.33720884535  
GGACCGCA -1.18083095075  
GGACCGCC -1.50367754357  
GGACCGGA -0.581140104961  
GGACCGTA -0.732043751103  
GGACCTAA -0.256268356638  
GGACCTAC -0.531047692105  
GGACCTCA -1.18786028881  
GGACCTCC -1.19821589482  
GGACCTGA -0.971546701372  
GGACCTTA -0.189500262128  
GGACGAAA -0.00407237787026  
GGACGAAC -0.7575792799  
GGACGACA -0.390847517397  
GGACGACC -1.65610005634  
GGACGAGA -0.424253215164  
GGACGATA 1.24205172632  
GGACGCAA 0.808772746153  
GGACGCAC -0.310778098296  
GGACGCCA -0.921404950333  
GGACGCCC -1.70762556649  
GGACGCGA 0.279603027709  
GGACGCTA -0.73758836373  
GGACGGAA 0.31996207857  
GGACGGAC -1.11261893369  
GGACGGCA -0.770390137143  
GGACGGCC -1.55441759815  
GGACGGGA -0.836257653662  
GGACGGTA 0.0607419661899  
GGACGTAA -0.315106535096

GGACGTAC -0.72607278995  
GGACGTCA -0.537726250252  
GGACGTCC -0.962562363792  
GGACGTGA 0.306939712488  
GGACGTTA -0.771215771057  
GGACTAAA 0.410872782936  
GGACTAAC -0.0669356777939  
GGACTACA -0.683336554604  
GGACTACC -1.16417587871  
GGACTAGA 0.229300771438  
GGACTATA -0.50057730402  
GGACTCAA -1.04768405457  
GGACTCAC -0.655934710113  
GGACTCCA -0.819899443444  
GGACTCCC -1.40613366386  
GGACTCGA 0.13607262967  
GGACTCTA -0.413669029719  
GGACTGAA -1.11655079141  
GGACTGAC -0.699227821587  
GGACTGCA -0.875253763213  
GGACTGCC -1.43794159554  
GGACTGGA -0.507698656754  
GGACTGTA -0.765978429146  
GGACTTAA -0.282533757473  
GGACTTAC 0.0373450499001  
GGACTTCA -0.608309830991  
GGACTTGA 0.767279957949  
GGACTTTA -1.23667844418  
GGAGAAAA 0.450477604934  
GGAGAAAC -0.44926746627  
GGAGAACA -0.0797700591495  
GGAGAACC -0.15977327765  
GGAGAAGA -0.667997375654  
GGAGAATA 1.80903468696  
GGAGACAA -0.281899230955  
GGAGACAC 0.60011844338  
GGAGACCA -0.605697613553  
GGAGACCC -1.46944288104  
GGAGACGA -0.407268597369  
GGAGACTA -0.705581413888  
GGAGAGAA -0.82573946064  
GGAGAGAC -1.32592559821  
GGAGAGCA -0.349453405562  
GGAGAGCC -0.599105449274  
GGAGAGGA -0.809662498888  
GGAGAGTA -0.715253363375  
GGAGATAA 0.960954188807  
GGAGATAC 2.35014965856  
GGAGATCA 3.60477533557  
GGAGATCC 6.41075069167  
GGAGATGA 0.194887075836  
GGAGATTA 4.93715132885  
GGAGCAAA -0.74498992404  
GGAGCAAC -0.796783775621

GGAGCACA 0.0536104127342  
GGAGCACC -1.02387140683  
GGAGCAGA -0.196850402475  
GGAGCATA 0.553600654818  
GGAGCCAA -0.00702808899397  
GGAGCCAC -1.14577002977  
GGAGCCCA -1.05360380394  
GGAGCCCC -1.68973058633  
GGAGCCGA -0.195875921296  
GGAGCCTA -0.838269485772  
GGAGCGAA -0.266468245511  
GGAGCGAC -0.410055476142  
GGAGCGCA 0.408094647639  
GGAGCGCC -1.23133243336  
GGAGCGGA -0.559783541166  
GGAGCGTA 0.419693908971  
GGAGCTAA -0.618474329605  
GGAGCTAC -0.891770813239  
GGAGCTCA -0.72716738983  
GGAGCTCC -1.13653504589  
GGAGCTGA -0.807499945912  
GGAGCTTA 0.139758004654  
GGAGGAAA -0.640997939221  
GGAGGAAC -0.793076541947  
GGAGGACA -0.937149035476  
GGAGGACC -1.64661130348  
GGAGGAGA 0.0222040563983  
GGAGGATA 1.8760078368  
GGAGGCAA -0.553553814769  
GGAGGCAC -1.18095544119  
GGAGGCCA -0.724104675218  
GGAGGCCC -1.4290107597  
GGAGGCGA -1.10502584962  
GGAGGCTA -0.380399688537  
GGAGGGAA -0.740015302755  
GGAGGGAC -0.858565799056  
GGAGGGCA -1.05268178361  
GGAGGGCC -1.74095174026  
GGAGGGGA -0.808357639237  
GGAGGGTA 0.116130635328  
GGAGGTAA -0.0593842293292  
GGAGGTAC -0.84595666287  
GGAGGTCA -0.619167145961  
GGAGGTGA -0.518681503053  
GGAGGTTA -0.787121194144  
GGAGTAAA -1.01730672205  
GGAGTAAC -0.501076098487  
GGAGTACA -0.00667085556051  
GGAGTACC -0.837878111148  
GGAGTAGA 0.36439891993  
GGAGTATA 0.709316543412  
GGAGTCAA -0.801280836593  
GGAGTCAC 0.275850411233  
GGAGTCCA -0.453719144441



GGAGTCCC -1.28574807856  
GGAGTCGA 0.17352967933  
GGAGTCTA -0.667219622678  
GGAGTGAA -1.10714510158  
GGAGTGAC -0.905306962604  
GGAGTGCA -0.171974589733  
GGAGTGCC -1.53562537086  
GGAGTGGA -0.578622400331  
GGAGTGTA 0.503773668901  
GGAGTTAA -0.80048934387  
GGAGTTAC 0.335331651507  
GGAGTTCA -0.101199485241  
GGAGTTGA 0.890784465915  
GGAGTTTA -0.207350275833  
GGATAAAA 0.843008657749  
GGATAAAC -0.181925081372  
GGATAACA 1.59182260332  
GGATAACC -0.195549914562  
GGATAAGA 0.212782472344  
GGATAATA 3.02552007414  
GGATACAA 0.18198128943  
GGATACAC 1.65649809266  
GGATACCA 1.66704085068  
GGATACCC 3.62668544464  
GGATACGA 4.31747268956  
GGATACTA 1.50832948897  
GGATAGAA 0.00343077330037  
GGATAGAC -0.25224344335  
GGATAGCA 0.158060389135  
GGATAGCC 0.800264719817  
GGATAGGA -0.190766817028  
GGATAGTA 0.513211418147  
GGATATAA 2.32140693963  
GGATATAC 1.70447729072  
GGATATCA 8.42441414358  
GGATATCC 16.7507473082  
GGATATGA 3.61111331452  
GGATATTA 3.14319830466  
GGATCAAA 0.0926233847024  
GGATCAAC -0.327016397991  
GGATCACA 2.79804523187  
GGATCACC 1.65399121328  
GGATCAGA 0.433768822978  
GGATCATA 1.72234479138  
GGATCCAA 1.81224062803  
GGATCCAC 1.675554706  
GGATCCCA 1.05121204699  
GGATCCCC 6.85231765403  
GGATCCGA 2.2653854094  
GGATCCTA 3.30466032218  
GGATCGAA 0.516808109307  
GGATCGAC -0.738400674253  
GGATCGCA 3.87969852203  
GGATCGCC 1.8088564866

GGATCGGA 0.247078131024  
GGATCGTA 3.06734823709  
GGATCTAA 1.81216318582  
GGATCTAC 2.12881648339  
GGATCTCA 4.96038232728  
GGATCTGA 2.36771967287  
GGATCTTA 3.16014732402  
GGATGAAA -0.0586583126727  
GGATGAAC -0.570154552348  
GGATGACA 0.33314848891  
GGATGACC -1.16594830613  
GGATGAGA 0.395523611443  
GGATGATA 1.19346527305  
GGATGCAA -0.549459161854  
GGATGCAC -0.0655714874154  
GGATGCCA -0.554221857944  
GGATGCCC -0.331681250425  
GGATGCGA 0.149737641212  
GGATGCTA -0.098800858423  
GGATGGAA -0.429402081428  
GGATGGAC -1.40989648105  
GGATGGCA -0.57325036726  
GGATGGCC -0.930932007937  
GGATGGGA -0.383532975487  
GGATGGTA 0.790260310078  
GGATGTAA 0.999860781822  
GGATGTAC -0.0786883663055  
GGATGTCA 0.794421163595  
GGATGTGA 0.0703112839265  
GGATGTTA 1.48625138025  
GGATTTAA -0.621336776989  
GGATTTAC -0.234783555201  
GGATTACA 13.0638467959  
GGATTACC 11.0556082543  
GGATTAGA 1.05986892059  
GGATTATA 2.68509971981  
GGATTCAA 1.20235197515  
GGATTCAC 1.97679929317  
GGATTCCA 6.22900235341  
GGATTCCC 17.6911607828  
GGATTCGA 3.26964832303  
GGATTCTA 7.73607902722  
GGATTGAA -0.540082200582  
GGATTGAC -0.491163911599  
GGATTGCA 9.03359457493  
GGATTGCC 6.93287379327  
GGATTGGA 0.258728187786  
GGATTGTA 3.18551089779  
GGATTTAA 2.11994893367  
GGATTTAC 3.65196907807  
GGATTTCA 12.605673267  
GGATTTGA 4.95528050924  
GGATTTTA 7.02597723642  
GGCAAAA 0.640083621482

GGCAAAAC -0.710228779371  
GGCAAACA 0.165535852633  
GGCAAACC -1.07991854296  
GGCAAAGA 0.0206058739574  
GGCAAATA 2.11208313643  
GGCAACAA 0.882283725809  
GGCAACAC -0.899186321475  
GGCAACCA -0.317183735095  
GGCAACCC -0.11853717291  
GGCAACGA -0.524793608884  
GGCAACTA 0.247781772636  
GGCAAGAA 0.152051955944  
GGCAAGAC -0.798014732084  
GGCAAGCA -1.01067208946  
GGCAAGCC -1.74958321614  
GGCAAGGA -0.364868361301  
GGCAAGTA 0.867127118958  
GGCAATAA 1.00633844821  
GGCAATAC 0.227421965064  
GGCAATCA 4.92826462675  
GGCAATGA 0.258378865117  
GGCAATTA 0.263114914424  
GGCACAAA 0.663128925144  
GGCACAAC -1.10806566466  
GGCACACA 0.612151339469  
GGCACACC -0.843977518122  
GGCACAGA -0.38492360447  
GGCACATA 0.717699454775  
GGCACCAA -0.517456791929  
GGCACCAC -0.441653148052  
GGCACCCA -0.892805041501  
GGCACCCC -1.16557233668  
GGCACCGA -1.15513096134  
GGCACCTA -0.815230843806  
GGCACGAA -0.77570658669  
GGCACGAC -0.942116786888  
GGCACGCA -0.675847351358  
GGCACGCC -1.31647744007  
GGCACGGA -0.221270721771  
GGCACGTA -0.874818879389  
GGCACTAA -0.316944330405  
GGCACTAC -1.1414574145  
GGCACTCA -0.409396176442  
GGCACTGA -0.768284000402  
GGCACTTA -0.625470151011  
GGCAGAAA 0.295522398721  
GGCAGAAC -0.757474774548  
GGCAGACA -0.267911543527  
GGCAGACC -1.23370024983  
GGCAGAGA -0.115853966777  
GGCAGATA 2.01089572552  
GGCAGCAA -0.156942473321  
GGCAGCAC -0.605937226422  
GGCAGCCA 0.792053555297

GGCAGCCC -0.827060349996  
GGCAGCGA -1.10384423134  
GGCAGCTA -0.395737618418  
GGCAGGAA -0.960866337695  
GGCAGGAC -1.13011213031  
GGCAGGCA -1.03536428921  
GGCAGGCC -1.90597984677  
GGCAGGGA -1.10883633958  
GGCAGGTA -0.313896188253  
GGCAGTAA -0.125495105921  
GGCAGTAC -0.598453643982  
GGCAGTCA -0.545100955601  
GGCAGTGA 0.0847101228885  
GGCAGTTA 0.63610679731  
GGCATAAA 1.02287215247  
GGCATAAC -0.221305279317  
GGCATAACA 0.706598987911  
GGCATAACC -0.918595796515  
GGCATAGA -0.628143780956  
GGCATATA 1.51117382486  
GGCATCAA -0.56047344303  
GGCATCAC 0.315220408457  
GGCATCCA -0.300979784769  
GGCATCCC -0.521425497159  
GGCATCGA -0.161556113969  
GGCATCTA 1.11382636604  
GGCATGAA 0.505574616706  
GGCATGAC -1.3437606231  
GGCATGCA 0.0255009712502  
GGCATGCC -1.11435680356  
GGCATGGA 0.263000416528  
GGCATGTA 0.169961508555  
GGCATTAA 1.52060074885  
GGCATTAC -0.852541127981  
GGCATTCA -0.660798997063  
GGCATTGA -0.220891837826  
GGCATTTA 0.326261544594  
GGCCAAAA -0.275437802454  
GGCCAAAC -1.02512089114  
GGCCAACA 0.599916510729  
GGCCAACC -0.587250545368  
GGCCAAGA 0.288496391507  
GGCCAATA 0.679248147028  
GGCCACAA -0.292181558313  
GGCCACAC -0.675518013776  
GGCCACCA -1.18080701028  
GGCCACCC -1.21754605404  
GGCCACGA -1.16208618803  
GGCCACTA -0.565220525771  
GGCCAGAA -0.106574224627  
GGCCAGAC -1.22372935675  
GGCCAGCA -1.01283339336  
GGCCAGCC -1.12073995714  
GGCCAGGA -0.81488214567

GGCCAGTA -1.44448254803  
GGCCATAA -0.646256515287  
GGCCATAC -0.128376289323  
GGCCATCA -0.0762389440572  
GGCCATGA -0.261208836733  
GGCCATTA -0.638682167243  
GGCCCAAA -0.878561919676  
GGCCCAAC -1.60301008858  
GGCCCACA -0.114068215966  
GGCCCACC -1.40599834816  
GGCCCAGA -0.802812818433  
GGCCCATA -0.685193918644  
GGCCCAA 0.0850719362377  
GGCCCCAC -0.891830352144  
GGCCCCCA -1.29692036683  
GGCCCCCC -1.69703201303  
GGCCCCGA -1.24895053678  
GGCCCCCTA -1.24758593004  
GGCCCGAA -0.108662249882  
GGCCCGAC -1.10086499611  
GGCCCGCA -0.651685797306  
GGCCCGCC -1.23340297166  
GGCCCGGA -0.670699109628  
GGCCCGTA -1.26025043816  
GGCCCTAA -0.811728873632  
GGCCCTAC -0.634699514087  
GGCCCTCA -1.04802963004  
GGCCCTGA -0.287831054646  
GGCCCTTA -0.655843319975  
GGCCGAAA 0.201577916484  
GGCCGAAC -0.6189558453  
GGCCGACA -0.0933644983523  
GGCCGACC -1.13343819009  
GGCCGAGA -0.449120492608  
GGCCGATA 0.995112658191  
GGCCGCAA -0.575882777963  
GGCCGCAC -1.3970412819  
GGCCGCCA -0.706536742691  
GGCCGCCC -1.66775177852  
GGCCGCGA -0.857983108858  
GGCCGCTA -1.335106664  
GGCCGGAA -0.358506233702  
GGCCGGAC -1.07336593249  
GGCCGGCA -0.251288530903  
GGCCGGCC -0.251234196447  
GGCCGGGA -1.57939562629  
GGCCGGTA -0.806052067981  
GGCCGTAA -0.445986164767  
GGCCGTAC -0.980467961021  
GGCCGTCA -0.543331650852  
GGCCGTGA -0.129116778439  
GGCCGTTA -1.37753417138  
GGCCTAAA 0.191040362909  
GGCCTAAC -0.768316267991

GGCCTACA -0.819333615663  
GGCCTACC -1.09388707801  
GGCCTAGA -0.986176617905  
GGCCTATA -0.462220925437  
GGCCTCAA -0.688567859353  
GGCCTCAC -1.35511277716  
GGCCTCCA -0.571209390231  
GGCCTCCC -1.0482011687  
GGCCTCGA -0.906718825742  
GGCCTCTA -1.57112450651  
GGCCTGAA -0.365179795576  
GGCCTGAC -1.13427673104  
GGCCTGCA -0.903753538431  
GGCCTGGA -0.772832897695  
GGCCTGTA -0.699183271497  
GGCCTTAA -0.332702571652  
GGCCTTAC -0.291880949293  
GGCCTTCA -0.88682554505  
GGCCTTGA -0.526795240273  
GGCCTTTA -0.731070310815  
GGCGAAAA 0.215305589602  
GGCGAAAC -0.610687848188  
GGCGAACA 0.216637096035  
GGCGAACC -0.829361341337  
GGCGAAGA 0.680244486895  
GGCGAATA 0.886774541442  
GGCGACAA -0.138926333578  
GGCGACAC -0.660806491471  
GGCGACCA -0.916868335541  
GGCGACCC -1.43928850714  
GGCGACGA 0.680007996697  
GGCGACTA -1.3687153353  
GGCGAGAA -0.736220217969  
GGCGAGAC -0.871888982336  
GGCGAGCA -0.23574242303  
GGCGAGCC -1.62495537974  
GGCGAGGA -0.0822186486859  
GGCGAGTA -0.603482599723  
GGCGATAA 0.834940303332  
GGCGATAC 0.180805083778  
GGCGATCA 1.51039711278  
GGCGATGA -0.331090857641  
GGCGATTA 0.585592615844  
GGCGCAAA 0.575573633645  
GGCGCAAC 0.751246089042  
GGCGCACA -0.252815932827  
GGCGCACC -1.19260924515  
GGCGCAGA 2.52918606212  
GGCGCATA 0.766862769254  
GGCGCCAA -0.491992876361  
GGCGCCAC -0.185603586482  
GGCGCCCA 0.0932266845219  
GGCGCCCC -1.03498936065  
GGCGCCGA -0.0659160219914

GGCGCCTA -1.28342855938  
GGCGCGAA -0.80927778596  
GGCGCGAC 0.12492615547  
GGCGCGCA -0.227202753639  
GGCGCGCC -0.437232072046  
GGCGCGGA -0.187694942585  
GGCGCGTA -0.129460480303  
GGCGCTAA -0.805125675919  
GGCGCTAC -0.626765018118  
GGCGCTCA 0.00697687720806  
GGCGCTGA -0.666366092912  
GGCGCTTA -0.463010752736  
GGCGGAAA 0.254741162893  
GGCGGAAC -1.28325306533  
GGCGGACA -0.588557903155  
GGCGGACC -1.5250366055  
GGCGGAGA -0.481699931926  
GGCGGATA 0.470895494166  
GGCGGCAA -0.764485792947  
GGCGGCAC -0.430932189666  
GGCGGCCA -0.890688704039  
GGCGGCCC -1.75048712498  
GGCGGCGA -0.121069241821  
GGCGGCTA -1.05794806226  
GGCGGGAA -0.464483403848  
GGCGGGAC -0.778039637441  
GGCGGGCA -0.794106398471  
GGCGGGGA -1.3840994807  
GGCGGGTA -0.721272413644  
GGCGGTAA 0.367371285293  
GGCGGTAC 0.117390320354  
GGCGGTCA -0.181121930681  
GGCGGTGA -0.145422735982  
GGCGGTTA -0.719778736554  
GGCGTAAA 0.177702398992  
GGCGTAAC -0.318352862696  
GGCGTACA -0.494926728795  
GGCGTACC -1.05590875066  
GGCGTAGA 0.857840715112  
GGCGTATA -0.43162417331  
GGCGTCAA -0.91079765713  
GGCGTCAC -0.64342654367  
GGCGTCCA -0.892850007947  
GGCGTCCC -0.95380202573  
GGCGTCGA -0.641762160628  
GGCGTCTA -0.451920278416  
GGCGTGAA 0.0304526929566  
GGCGTGAC -1.43949377064  
GGCGTGCA -0.805820157699  
GGCGTGGA 0.242880221825  
GGCGTGTA -0.806322074836  
GGCGTTAA 0.407455124849  
GGCGTTAC 0.0506980026327  
GGCGTTCA -1.32168626159

GGCGTTGA 0.0488154490553  
GGCGTTTA -0.545243557526  
GGCTAAAA 0.446717910407  
GGCTAAAC -0.488894355135  
GGCTAACA 0.441633371142  
GGCTAACC -1.05794806226  
GGCTAAGA 1.042171085  
GGCTAATA 0.18625684902  
GGCTACAA -0.117075138875  
GGCTACAC 0.289516047309  
GGCTACCA -1.04322404928  
GGCTACCC -1.02463208921  
GGCTACGA 0.123759317827  
GGCTACTA -1.16365959729  
GGCTAGAA -0.425167532903  
GGCTAGAC -1.07650171758  
GGCTAGCA -0.942202764398  
GGCTAGCC -1.31076649323  
GGCTAGGA -0.348642760463  
GGCTAGTA -1.00559213011  
GGCTATAA 0.800279084098  
GGCTATAC -0.40133552461  
GGCTATCA -0.613536764002  
GGCTATGA 0.0380878289739  
GGCTATTA -0.3126329642  
GGCTCAAA -0.163690562916  
GGCTCAAC -1.36148198281  
GGCTCACA -0.644291315047  
GGCTCACC -1.0457134417  
GGCTCAGA -0.222262273544  
GGCTCATA -0.286585317545  
GGCTCCAA -0.185050249381  
GGCTCCAC -0.785954148323  
GGCTCCCA -0.947679510999  
GGCTCCCC -1.29045206846  
GGCTCCGA -0.747656684112  
GGCTCCTA -0.913867657971  
GGCTCGAA -0.0995532136844  
GGCTCGAC -1.4210671039  
GGCTCGCA -0.980320154647  
GGCTCGGA -0.0967494724945  
GGCTCGTA -0.69188392658  
GGCTCTAA -0.366670974529  
GGCTCTAC -1.22063333366  
GGCTCTCA -0.590865764369  
GGCTCTGA -0.846320977772  
GGCTCTTA -0.533994451576  
GGCTGAAA -0.13785338421  
GGCTGAAC -0.723463070649  
GGCTGACA -0.561269307491  
GGCTGACC -1.10342350362  
GGCTGAGA -0.660164886901  
GGCTGATA 0.912351081303  
GGCTGCAA -0.362473689864



GGCTGCAC 0.0563823026914  
GGCTGCCA 0.000138854720349  
GGCTGCCC -0.692756400542  
GGCTGCGA -0.230842329465  
GGCTGCTA -1.29057572618  
GGCTGGAA -1.17329282567  
GGCTGGAC -0.957230300895  
GGCTGGCA -1.2692493482  
GGCTGGGA -1.05205204519  
GGCTGGTA -0.726224343528  
GGCTGTAA 0.0686974881362  
GGCTGTAC -0.298669633597  
GGCTGTCA -0.700876383102  
GGCTGTGA -0.631110317335  
GGCTGTTA -0.436789485636  
GGCTTAAA 1.04461571915  
GGCTTAAC -1.07646799275  
GGCTTACA -0.975515822958  
GGCTTACC -1.45668281923  
GGCTTAGA 0.224088619064  
GGCTTATA 0.547197516154  
GGCTTCAA -0.339101130399  
GGCTTCAC -0.674259161461  
GGCTTCCA -1.13334430181  
GGCTTCCC -1.00705603774  
GGCTTCGA -0.643444030621  
GGCTTCTA -0.662749624843  
GGCTTGAA -0.559454411761  
GGCTTGAC -1.38562438449  
GGCTTGCA -0.731627811476  
GGCTTGGA -0.931631069633  
GGCTTGTA -0.986319011651  
GGCTTTAA -0.26457986295  
GGCTTTAC -1.18344025369  
GGCTTTCA -0.451245781723  
GGCTTTGA 0.607397178676  
GGCTTTTA -0.613817387935  
GGGAAAAA -0.0694970998016  
GGGAAAAC -0.426556080106  
GGGAAACA 1.09399491421  
GGGAAACC -0.02879809428  
GGGAAAGA -0.206145757974  
GGGAAATA 1.42991217041  
GGGAACAA 0.399899929181  
GGGAACAC -0.93006723656  
GGGAACCA -1.38980251678  
GGGAACCC -1.34185308817  
GGGAACGA 0.347189261726  
GGGAACTA -0.0156635202605  
GGGAAGAA -1.06904145108  
GGGAAGAC -1.029119574  
GGGAAGCA -0.229739402466  
GGGAAGGA -1.06235394128  
GGGAAGTA 0.00649223884378

GGGAATAA 1.30654089635  
GGGAATAC 0.947754871432  
GGGAATCA 10.6219647544  
GGGAATGA -0.441488895616  
GGGAATTA 0.679422600185  
GGGACAAA 0.519035613816  
GGGACAAC -0.238955025795  
GGGACACA 0.194445738494  
GGGACACC -0.798883458843  
GGGACAGA -0.914097070118  
GGGACATA -0.789251479531  
GGGACCAA 0.156027114692  
GGGACCAC -1.37141332207  
GGGACCCA -1.13684627198  
GGGACCCC -0.930081392664  
GGGACCGA -0.456723569214  
GGGACCTA -0.756914359395  
GGGACGAA -0.326437246819  
GGGACGAC -1.31017859858  
GGGACGCA 0.0878594395443  
GGGACGGA -0.573955882473  
GGGACGTA 0.312004683022  
GGGACTAA -0.169122551249  
GGGACTAC -0.87846511691  
GGGACTCA -1.22318517948  
GGGACTGA -1.68033821989  
GGGACTTA 0.144137028706  
GGGAGAAA -0.290699331013  
GGGAGAAC -0.645181067782  
GGGAGACA 0.370472721011  
GGGAGACC -1.03575337387  
GGGAGAGA -1.18710293728  
GGGAGATA 1.40767334828  
GGGAGCAA -0.952463857601  
GGGAGCAC -0.5329906173  
GGGAGCCA 0.0639785094242  
GGGAGCCC -1.28173836227  
GGGAGCGA -0.266468245511  
GGGAGCTA -0.62775573718  
GGGAGGAA -1.17805926897  
GGGAGGAC -1.51074643545  
GGGAGGCA -1.37299714023  
GGGAGGGA -0.17827988474  
GGGAGGTA -0.715869986586  
GGGAGTAA -0.124038692692  
GGGAGTAC 0.0495911202517  
GGGAGTCA -0.438881466272  
GGGAGTGA -0.762584086994  
GGGAGTTA 0.0743361972147  
GGGATAAA 0.546350231729  
GGGATAAC 0.658962659  
GGGATACA 2.45219809365  
GGGATACC 1.65914736578  
GGGATAGA -0.509766280566

GGGATATA 2.15069099403  
GGGATCAA -0.394405695628  
GGGATCAC 2.17878086678  
GGGATCCA 3.56497316083  
GGGATCCC 1.25045941086  
GGGATCGA 1.88367045231  
GGGATCTA 1.56928650302  
GGGATGAA -0.852435165384  
GGGATGAC -1.28357928024  
GGGATGCA -0.0655714874154  
GGGATGGA -1.09671496785  
GGGATGTA -0.0212112555567  
GGGATTAA -0.092092114468  
GGGATTAC 9.10901683673  
GGGATTCA 0.954289370408  
GGGATTGA 1.56520288354  
GGGATTTA 2.0275909759  
GGGCAAAA -0.650970914083  
GGGCAAAC -0.651401842525  
GGGCAACA 0.179038901697  
GGGCAACC -1.13227280969  
GGGCAAGA -0.334267237436  
GGGCAATA -0.174436086305  
GGGCACAA -0.887636398327  
GGGCACAC -1.12365028546  
GGGCACCA -1.45858702331  
GGGCACCC -1.80810204956  
GGGCACGA -0.438749897782  
GGGCACTA -1.49500547297  
GGGCAGAA -0.392119901282  
GGGCAGAC -1.37854883091  
GGGCAGCA -0.629086410901  
GGGCAGGA -1.13103810602  
GGGCAGTA -0.979162685014  
GGGCATAA 0.120548380486  
GGGCATAC -0.419968912098  
GGGCATCA -0.847879814573  
GGGCATGA 0.227456938967  
GGGCATTA -0.146985319986  
GGGCCAAA -0.670699109628  
GGGCCAAC -0.701577318399  
GGGCCACA 0.0265485229035  
GGGCCACC -1.5501720162  
GGGCCAGA -0.835456792929  
GGGCCATA -1.03222225878  
GGGCCCAA -1.3869750433  
GGGCCCAC -0.853469810002  
GGGCCCCA -1.11117792563  
GGGCCCCC -1.67636118754  
GGGCCCGA -1.17823413848  
GGGCCCTA -1.14027871071  
GGGCCGAA 0.528554760657  
GGGCCGAC -0.968074500651  
GGGCCGCA -1.17994203072

GGGCCGGA -1.00786605831  
GGGCCGTA -1.17322912321  
GGGCCTAA -0.787908106952  
GGGCCTAC -2.01100834981  
GGGCCTCA -1.42738239145  
GGGCCTGA -0.855512660632  
GGGCCTTA -0.972476840638  
GGGCGAAA -0.950103119177  
GGGCGAAC -0.28218797383  
GGGCGACA -0.262046128615  
GGGCGACC -0.560693695345  
GGGCGAGA -1.08942145191  
GGGCGATA 0.858601813849  
GGGCGCAA -0.565949356919  
GGGCGCAC -0.545564567989  
GGGCGCCA -0.36061778307  
GGGCGCCC -0.922106301986  
GGGCGCGA 0.0511426708226  
GGGCGCTA -1.40113364486  
GGGCGGAA -1.19721122783  
GGGCGGAC -0.678484966511  
GGGCGGCA -0.0666090465251  
GGGCGGGA -0.561169173878  
GGGCGGTA 0.0316932256081  
GGGCGTAA -0.420428360925  
GGGCGTAC -0.602427137306  
GGGCGTCA -1.04018714874  
GGGCGTGA -0.854570238865  
GGGCGTTA -0.283995166974  
GGGCTAAA -0.470216001201  
GGGCTAAC 0.361300398704  
GGGCTACA 0.576590583134  
GGGCTACC -0.651592533566  
GGGCTAGA -0.169910713125  
GGGCTATA -1.03799232817  
GGGCTCAA -1.65186446692  
GGGCTCAC -1.05126346696  
GGGCTCCA -1.22252712885  
GGGCTCGA -0.947977621883  
GGGCTCTA -1.49022299997  
GGGCTGAA -0.924319442214  
GGGCTGAC -1.58619388678  
GGGCTGCA 0.00786454816393  
GGGCTGGA -1.02627773623  
GGGCTGTA -0.556914640265  
GGGCTTAA 0.332164223366  
GGGCTTAC -0.273547754469  
GGGCTTCA -1.55261477675  
GGGCTTGA -0.791097185604  
GGGCTTTA -1.36142785653  
GGGGAAAA 0.0987225834982  
GGGGAAAC 0.0802336715367  
GGGGAAACA 0.378908093227  
GGGGAAACC -0.915394019005

GGGAAGA 0.216438494231  
GGGAATA 1.39204001383  
GGGACAA 0.167823520582  
GGGACAC -0.802984773454  
GGGACCA -1.64382900463  
GGGACCC -1.44995346565  
GGGACGA -0.19825227307  
GGGACTA -0.937433406612  
GGGAGAA 0.585782057816  
GGGAGAC -1.14997938876  
GGGAGCA -0.5329906173  
GGGAGGA -1.4807051022  
GGGAGTA -0.554294720241  
GGGATAA 1.54822097206  
GGGATAC 1.13785177168  
GGGATCA 0.128920050237  
GGGATGA -0.201177382028  
GGGATTA 2.05640926345  
GGGCAAA -0.567134097869  
GGGCAAC -0.442984446307  
GGGCACA -0.497800834147  
GGGCACC -1.7440198675  
GGGCAGA 0.395985350228  
GGGCATA 0.170966175542  
GGGCCAA -1.17844897817  
GGGCCAC -1.24895053678  
GGGCCCA -1.32089934879  
GGGCCCC -0.740105652003  
GGGCCGA -0.59669183364  
GGGCCTA -0.782512757945  
GGGCGAA -0.62803761018  
GGGCGAC -1.18098854149  
GGGCGCA 0.287848541597  
GGGCGGA -0.479182019118  
GGGCGTA -0.521662611891  
GGGCTAA -0.450489679258  
GGGCTAC -0.935188831508  
GGGCTCA -1.04982329161  
GGGCTGA -1.1708833736  
GGGCTTA -1.01277114814  
GGGGAAA 0.258948648279  
GGGGAAC -0.71316533812  
GGGGACA 0.130606708325  
GGGGACC -1.89610554828  
GGGGAGA 0.087301106171  
GGGGATA 0.414411600614  
GGGGCAA -1.62071979032  
GGGGCAC -1.59608067595  
GGGGCCA -0.803811031903  
GGGGCGA -0.657561412939  
GGGGGCTA -0.976546928551  
GGGGGAA 0.0394309933752  
GGGGGAC -0.798883458843  
GGGGGCA -0.970813498486

GGGGGGGA -0.991257409966  
GGGGGGTA -1.1148331148  
GGGGGTAA -0.599616109887  
GGGGGTAC -0.800103590051  
GGGGGTCA -1.00135695705  
GGGGGTGA -0.909279831394  
GGGGGTTA -1.11765684108  
GGGGTAAA -0.678435003793  
GGGGTAAC 0.824878644645  
GGGGTACA -0.336162906227  
GGGGTACC -0.800103590051  
GGGGTAGA -0.397384930865  
GGGGTATA -0.627718473319  
GGGGTCAA -1.30158979918  
GGGGTCAC -0.106418507489  
GGGGTCCA -1.40728572086  
GGGGTCGA 0.327610537979  
GGGGTCTA -1.07650171758  
GGGGTGAA 0.286731874851  
GGGGTGAC -0.821984554207  
GGGGTGCA -0.546832371957  
GGGGTGGA 0.0292906434079  
GGGGTGTA -0.0616356743076  
GGGGTTAA -0.515223874791  
GGGGTTAC -0.321301079412  
GGGGTTCA -1.12969827247  
GGGGTTGA 0.142820719265  
GGGGTTTA -0.774880120064  
GGGTAAAA 0.630437486066  
GGGTAAAC -0.982777071303  
GGGTAAACA -0.0264331922962  
GGGTAAACC -0.310778098296  
GGGTAAAGA -0.236794138243  
GGGTAAATA 1.19972518526  
GGGTACAA 0.152060907597  
GGGTACAC -0.385592272179  
GGGTACCA -1.2049404603  
GGGTACCC -1.42994318893  
GGGTACGA 1.01619088801  
GGGTACTA -0.100032855777  
GGGTAGAA 1.03569758217  
GGGTAGAC -0.893706452204  
GGGTAGCA -1.22928479463  
GGGTAGGA -0.928077887673  
GGGTAGTA -0.689951410284  
GGGTATAA 0.230692857667  
GGGTATAC -0.0771940646824  
GGGTATCA 2.12848048412  
GGGTATGA 0.128957522276  
GGGTATTA 0.77713177322  
GGGTCAAA 0.307681242494  
GGGTCAAC -1.03802875932  
GGGTCACA -0.491789070107  
GGGTCACC -0.776085262457

GGGTCAGA -0.360115865932  
GGGTCATA -0.194751760142  
GGGTCCAA -0.935116385567  
GGGTCCAC -1.22588045994  
GGGTCCCA -1.37494526988  
GGGTCCGA -0.168748871754  
GGGTCCTA -1.34517769069  
GGGTGCGAA -1.08820256977  
GGGTGCGAC -0.749407461021  
GGGTGCGA -1.05557108596  
GGGTGCGA -0.62425959599  
GGGTGCGA -0.73093395423  
GGGTCTAA -0.815359914161  
GGGTCTAC -0.689088720687  
GGGTCTCA -1.29828705535  
GGGTCTGA -0.433340392672  
GGGTCTTA -0.830071436466  
GGGTGAAA -0.376691830329  
GGGTGAAC 0.378286473745  
GGGTGACA -0.235360208237  
GGGTGACC -1.23349706811  
GGGTGAGA 0.125172013678  
GGGTGATA 0.286274715981  
GGGTGCAA -0.482459989773  
GGGTGCAC -0.975016612135  
GGGTGCCA -0.932243321106  
GGGTGCGA -0.212963379019  
GGGTGCTA -0.434936701511  
GGGTGGAA -0.430627417086  
GGGTGGAC -0.243623000899  
GGGTGGCA -0.55767594718  
GGGTGGGA -0.534075016458  
GGGTGGTA -0.896443368259  
GGGTGTAA 0.685698750273  
GGGTGTAC -0.38881778198  
GGGTGTCA -0.644154750284  
GGGTGTGA 0.216959147388  
GGGTGTTA 0.116154159441  
GGGTTAAA -0.316461357465  
GGGTTAAC -0.0390841688414  
GGGTTACA 0.541617929625  
GGGTTACC -1.53467774464  
GGGTTAGA -1.00144480816  
GGGTTATA -0.0944237079731  
GGGTTCAA -0.473078656763  
GGGTTCAC -0.452805451236  
GGGTTCGA -0.979479948273  
GGGTTCGA 0.411522090092  
GGGTTCCTA -0.276467034444  
GGGTTGAA 0.264886509132  
GGGTTGAC -0.996192477433  
GGGTTGCA -0.386279675907  
GGGTTGGA 0.238213912145  
GGGTTGTA -0.145539315657

GGGTTTAA 0.147772440972  
GGGTTTAC -0.462651437523  
GGGTTTCA -1.36101941131  
GGGTTTGA -0.528527905696  
GGGTTTTA -0.504701934566  
GGTAAAAA 2.17335533197  
GGTAAAAC 0.0790149975742  
GGTAAACA 1.25114348374  
GGTAAACC 0.072190714834  
GGTAAAGA -0.0551588406351  
GGTAAATA 1.09772962738  
GGTAACAA 1.17255545923  
GGTAACAC -0.515897122416  
GGTAACCA -0.44032143344  
GGTAACGA 1.0183088909  
GGTAACTA 0.639178047219  
GGTAAGAA -0.0398521374521  
GGTAAGAC -0.445042493932  
GGTAAGCA 0.0385320808078  
GGTAAGGA -0.61999132263  
GGTAAGTA -0.559783541166  
GGTAATAA 1.03875988043  
GGTAATAC 0.502365969323  
GGTAATCA 4.42543691864  
GGTAATGA 1.30310471043  
GGTAATTA 1.85968730679  
GGTACAAA 1.63563282892  
GGTACAAC -0.12822431939  
GGTACACA 1.07380206539  
GGTACACC -0.826421243562  
GGTACAGA -0.71501437504  
GGTACATA 0.644051494  
GGTACCAA -0.207040090626  
GGTACCAC -0.584489480666  
GGTACCCA -1.27786812523  
GGTACCGA -0.0500709705222  
GGTACCTA -0.328193019999  
GGTACGAA 0.702403785026  
GGTACGAC -0.273421806784  
GGTACGCA 0.294388453201  
GGTACGGA -0.776209128362  
GGTACGTA 0.174710464898  
GGTACTAA 0.556135013686  
GGTACTAC 0.0033343868903  
GGTACTCA 0.0111335671649  
GGTACTGA 1.14720604156  
GGTACTTA 0.605851248911  
GGTAGAAA 2.35508097882  
GGTAGAAC 0.242284208236  
GGTAGACA 0.679923476432  
GGTAGACC -0.884730025387  
GGTAGAGA -0.110649516989  
GGTAGATA 0.975767718328  
GGTAGCAA -0.63256610603



GGTAGCAC -1.05640046707  
GGTAGCCA -1.38942404919  
GGTAGCGA 0.846803534357  
GGTAGCTA -0.329328006409  
GGTAGGAA 0.24585446079  
GGTAGGAC -0.871778023466  
GGTAGGCA 0.546898156202  
GGTAGGGA -0.506187492713  
GGTAGGTA -0.459474641372  
GGTAGTAA 1.5397945515  
GGTAGTAC -0.362940008565  
GGTAGTCA -0.145052179157  
GGTAGTGA 0.136046815599  
GGTAGTTA 0.745591766614  
GGTATAAA 3.70035089237  
GGTATAAC -0.569328085722  
GGTATACA 1.6786430265  
GGTATACC -0.186133607649  
GGTATAGA -0.396677958406  
GGTATATA 0.152051955944  
GGTATCAA 1.19610122278  
GGTATCAC 1.89453463715  
GGTATCCA 3.70735733085  
GGTATCGA 1.27379200015  
GGTATCTA 5.57596673001  
GGTATGAA 0.0545336821266  
GGTATGAC -0.162027845298  
GGTATGCA 0.890379143365  
GGTATGGA 0.169124216673  
GGTATGTA -0.0830651003994  
GGTATTAA 2.36656865675  
GGTATTAC 1.51211832841  
GGTATTCA 0.035481856876  
GGTATTGA 0.814515336049  
GGTATTTA 0.22855736783  
GGTCAAAA 1.45640677521  
GGTCAAAC 0.981341892229  
GGTCAACA 1.15292323374  
GGTCAACC -1.15845722929  
GGTCAAGA -0.138005354143  
GGTCAATA -0.613781373142  
GGTCACAA -0.144224047106  
GGTCACAC -1.37837229598  
GGTCACCA -0.989474573646  
GGTCACGA -0.346521010373  
GGTCACTA -0.682806741615  
GGTCAGAA 0.847776766467  
GGTCAGAC -0.425883873371  
GGTCAGCA -0.222642198379  
GGTCAGGA -0.26359830372  
GGTCAGTA -0.948724148161  
GGTCATAA -0.707694836858  
GGTCATAC -0.515239904497  
GGTCATCA 0.0532540120127

GGTCATGA 0.734551879545  
GGTCATTA -0.23476398647  
GGTCCAAA 0.847554224194  
GGTCCAAC -0.971668901853  
GGTCCACA 0.314999115252  
GGTCCACC -1.43043240721  
GGTCCAGA -0.992844975329  
GGTCCATA -0.764436662941  
GGTCCCAA -0.566752091254  
GGTCCCAC -0.723779917552  
GGTCCCCA -1.39117024618  
GGTCCCGA -0.676415885453  
GGTCCCTA -0.885864387263  
GGTCCGAA -0.956782718213  
GGTCCGAC -0.266934356034  
GGTCCGCA -0.206634976254  
GGTCCGGA -0.205185641077  
GGTCCGTA 0.240706010882  
GGTCCTAA -1.15620932333  
GGTCCTAC -1.2494932568  
GGTCCTCA -0.485200028497  
GGTCCTGA -1.19619906644  
GGTCCTTA -1.25727099474  
GGTCGAAA 0.630091494245  
GGTCGAAC -1.16988786644  
GGTCGACA -0.163022936097  
GGTCGACC -1.80378631162  
GGTCGAGA -0.67571661558  
GGTCGATA 0.109138769304  
GGTCGCAA -1.07151127477  
GGTCGCAC -0.505215509671  
GGTCGCCA -0.543485286209  
GGTCGCGA 0.419977655574  
GGTCGCTA -0.881722061588  
GGTCGGAA 0.150137342956  
GGTCGGAC -0.908341781364  
GGTCGGCA -0.862680853415  
GGTCGGGA -0.996922974005  
GGTCGGTA -0.693476280037  
GGTCGTAA -0.522823412372  
GGTCGTAC -0.611170612951  
GGTCGTCA -0.625155594065  
GGTCGTGA -0.0369114151438  
GGTCGTTA -0.605742163644  
GGTCTAAA 1.78259670657  
GGTCTAAC -0.431294627549  
GGTCTACA -0.00325257293963  
GGTCTAGA 0.0313545200159  
GGTCTATA -0.578181062989  
GGTCTCAA -0.765864763963  
GGTCTCAC -0.67626079285  
GGTCTCCA -0.742176814841  
GGTCTCGA 0.215123225681  
GGTCTCTA -0.476331229702

GGTCTGAA -0.233452465123  
GGTCTGAC -0.633575977467  
GGTCTGCA 0.117740475736  
GGTCTGGA -0.432406089846  
GGTCTGTA -1.42805896992  
GGTCTTAA -0.478788146358  
GGTCTTAC -0.0252367933789  
GGTCTTCA -0.903538282388  
GGTCTTGA 0.248713577326  
GGTCTTTA -0.615656432312  
GGTGAAAA 0.707148577808  
GGTGAAAC -1.18043291443  
GGTGAACA 0.941803687189  
GGTGAACC -0.0519256282487  
GGTGAAGA 0.693322852857  
GGTGAATA 0.929009276007  
GGTGACAA -0.280179264389  
GGTGACAC -0.710512734152  
GGTGACCA -0.809553205443  
GGTGACGA -0.167099061171  
GGTGACTA -0.0185370010776  
GGTGAGAA 0.180279642527  
GGTGAGAC -0.055997381585  
GGTGAGCA 0.151858766768  
GGTGAGGA -0.538856032212  
GGTGAGTA 0.164921103024  
GGTGATAA -0.231379428683  
GGTGATAC 0.574072462148  
GGTGATCA 1.1200034234  
GGTGATGA -0.774980461856  
GGTGATTA 1.30348671704  
GGTGCAAA -0.595393219329  
GGTGCAAC 0.294923054283  
GGTGCACA 0.882503561768  
GGTGCACC -0.685051524898  
GGTGCAGA -0.108036050483  
GGTGCATA 0.713503211  
GGTGCCAA -1.22281628808  
GGTGCCAC -0.615038143677  
GGTGCCCA -1.17437930661  
GGTGCCGA -0.916162195794  
GGTGCCTA -0.0608106649271  
GGTGCGAA -0.413750219135  
GGTGCGAC -0.761133502749  
GGTGCGCA 0.0482504539863  
GGTGCGGA 0.735868605342  
GGTGCGTA 0.533915760295  
GGTGCTAA -0.630823239885  
GGTGCTAC -1.3406808379  
GGTGCTCA -0.0631795222927  
GGTGCTGA -0.403082970671  
GGTGCTTA -0.395871685045  
GGTGGAAA 0.455217401446  
GGTGGAAC 0.142777626421

GGTGGACA -0.381128519685  
GGTGGAGA 0.0373429681202  
GGTGGATA 2.83561782031  
GGTGGCAA -0.855721879514  
GGTGGCAC -0.713064371794  
GGTGGCCA -0.621793935858  
GGTGGCGA -0.601404983368  
GGTGGCTA -0.857951257625  
GGTGGGAA -0.21028600187  
GGTGGGAC -0.298335716098  
GGTGGGCA 0.152051955944  
GGTGGGGA -0.622386826778  
GGTGGGTA 0.122090146691  
GGTGGTAA -0.402917885524  
GGTGGTAC -0.937289763798  
GGTGGTCA -0.583637616325  
GGTGGTGA 0.315696095168  
GGTGGTTA -0.571450252167  
GGTGTA 0.79600227544  
GGTGTAAC -0.466592663259  
GGTGTAACA 0.939751676726  
GGTGTAGA 0.757756231193  
GGTGTTAA 0.215778153642  
GGTGTTAC -0.91381290716  
GGTGTTCA -0.152101918662  
GGTGTTGA -0.124974452764  
GGTGTTTA -0.264022154111  
GGTGTTCA 0.11917565481  
GGTGTTGA 0.0181735223044  
GGTGTTGAC -0.913290796757  
GGTGTTGCA 0.540892221147  
GGTGTTGGA -0.0249755299995  
GGTGTTGTA -0.685714571801  
GGTGTTTAA 0.287171963125  
GGTGTTTAC 0.256931611719  
GGTGTTTCA -0.459222746003  
GGTGTTTGA -0.301778980078  
GGTGTTTTA -0.0163215708917  
GGTTAAAA 0.302303380439  
GGTTAAAC -0.876912525449  
GGTTAACA 0.778517197754  
GGTTAACC -0.95946654888  
GGTTAAGA 0.943906493081  
GGTTAATA 0.299735921269  
GGTTACAA 1.5251727539  
GGTTACAC 0.505348327229  
GGTTACCA -0.921293366929  
GGTTACGA 1.18045331587  
GGTTACTA 0.470833248946  
GGTTAGAA 0.0995221951636  
GGTTAGAC -0.509212527108  
GGTTAGCA -0.395135567667  
GGTTAGGA -1.05635050436  
GGTTAGTA 0.282413222416

GGTTATAA 0.41865135359  
GGTTATAC -0.931181196993  
GGTTATCA 0.133099015239  
GGTTATGA 0.532099407319  
GGTTATTA 0.255375689411  
GGTTCAAA 0.423715283234  
GGTTCAAC -0.750636127527  
GGTTCACA 0.784237720783  
GGTTCAGA -0.274843662466  
GGTTCATA -0.127762372426  
GGTTCCAA -0.203675726105  
GGTTCCAC 0.0383459696834  
GGTTCCCA -1.63003409002  
GGTTCCGA -0.430323893575  
GGTTCCTA -0.591261302553  
GGTTCGAA 0.884611155754  
GGTTCGAC -0.342484647296  
GGTTCGCA 0.267848465595  
GGTTCGGA -0.657336997064  
GGTTCGTA -0.299626211468  
GGTTCTAA -0.0320927191739  
GGTTCTAC -0.373948877113  
GGTTCTCA 0.0288988524279  
GGTTCTGA -0.253764391756  
GGTTCTTA -0.120169288363  
GGTTGAAA 0.0903067800127  
GGTTGAAC -1.31318052522  
GGTTGACA -0.630907135615  
GGTTGAGA -0.292708248631  
GGTTGATA 1.1719115647  
GGTTGCAA -0.310158352415  
GGTTGCAC -0.833905242358  
GGTTGCCA -0.317183735095  
GGTTGCGA 0.224253496033  
GGTTGCTA -0.0662588911434  
GGTTGGAA 0.0141003117221  
GGTTGGAC -1.26970796431  
GGTTGGCA 0.0303794143036  
GGTTGGGA -1.04499272949  
GGTTGGTA -0.0316047499618  
GGTTGTAA 1.74252161049  
GGTTGTAC -0.038945522299  
GGTTGTCA 0.0856131990157  
GGTTGTGA 0.255685041906  
GGTTGTTA -0.419875648358  
GGTTTAAA 0.725000673294  
GGTTTAAC -0.749534657773  
GGTTTACA -0.483033728318  
GGTTTAGA 0.140667117943  
GGTTTATA 0.606884644461  
GGTTTCAA -0.0397278551912  
GGTTTCAC -1.06920695258  
GGTTTCCA 0.673935652862  
GGTTTCGA -0.594314024621

GGTTTCTA 0.0791775845856  
GGTTTGAA -0.597264114939  
GGTTTGAC 0.343425403639  
GGTTTGCA 0.708921005228  
GGTTTGGA -0.638312234952  
GGTTTGTA -0.0179024745594  
GGTTTTAA 0.466482328923  
GGTTTTAC 0.304772995952  
GGTTTTCA 0.466611399278  
GGTTTTGA 1.25967149516  
GGTTTTTA 1.10694171168  
GTAAAAAA 2.48676958817  
GTAAAAAC 1.56049431373  
GTAAAACA 1.745916369  
GTAAAAGA 0.821559454748  
GTAAAATA 2.18820196179  
GTAAACAA -0.210776052862  
GTAAACAC 1.39957564077  
GTAAACCA 0.223532159293  
GTAAACGA 0.370098208804  
GTAAACTA -0.102399006829  
GTAAAGAA 0.124255197803  
GTAAAGAC -0.322550980073  
GTAAAGCA 0.530725224397  
GTAAAGGA -0.218550251777  
GTAAAGTA 1.40474178581  
GTAAATAA 1.26611439582  
GTAAATAC 1.92586667395  
GTAAATCA 2.66743144549  
GTAAATGA 2.31343164077  
GTAAATTA 1.73528097177  
GTAACAAA 2.42227250737  
GTAACAAC 1.00957603233  
GTAACACA 1.35893783958  
GTAACAGA 0.732157416287  
GTAACATA 0.87788367578  
GTAACCAA 0.0903546609507  
GTAACCAC -0.106468053851  
GTAACCCA 0.281749342801  
GTAACCGA 2.29005783224  
GTAACCTA 0.123716016805  
GTAACGAA 0.534877958972  
GTAACGAC -0.746556671605  
GTAACGCA 0.773955809782  
GTAACGGA 0.481416809857  
GTAACGTA 1.70218254472  
GTAAC TAA 0.216729110708  
GTAAC TAC 0.771489733294  
GTAAC TCA 0.774518723071  
GTAAC TGA 1.11231582653  
GTAAC TTA 0.678423762182  
GTAAGAAA 0.343245954211  
GTAAGAAC 0.151409102306  
GTAAGACA 0.301606192345

GTAAGAGA 0.717252496627  
GTAAGATA 1.83607221997  
GTAAGCAA -0.154652723592  
GTAAGCAC 0.0935972413468  
GTAAGCCA -0.490383452308  
GTAAGCGA 0.975544551521  
GTAAGCTA -0.621114026538  
GTAAGGAA 0.212897802951  
GTAAGGAC -0.800372556016  
GTAAGGCA -0.375655936644  
GTAAGGGA 1.09296068595  
GTAAGGTA -0.190416869824  
GTAAGTAA 0.838587998099  
GTAAGTAC 0.02162240709  
GTAAGTCA 0.676702546548  
GTAAGTGA 2.48589836328  
GTAAGTTA 0.61481914043  
GTAATAAA 1.57852689953  
GTAATAAC 0.241714633251  
GTAATACA 3.45900764865  
GTAATAGA 1.22800033642  
GTAATATA 2.24672329334  
GTAATCAA 4.42543691864  
GTAATCAC 7.49194245122  
GTAATCCA 16.7282388956  
GTAATCGA 6.16452921308  
GTAATCTA 15.0110550448  
GTAATGAA -0.350320675075  
GTAATGAC -0.451674628386  
GTAATGCA 1.63439854161  
GTAATGGA 0.0990789842197  
GTAATGTA 1.31064699906  
GTAATTAA 0.677621027846  
GTAATTAC 4.41664035761  
GTAATTCA 1.44228481298  
GTAATTGA 1.4281840849  
GTAATTTA 3.38219121885  
GTACAAAA 1.76185614146  
GTACAAAC 0.0497262277682  
GTACAACA 1.46755949475  
GTACAAGA 0.720012104083  
GTACAATA 2.91213072661  
GTACACAA 0.0920775420086  
GTACACAC 0.301228557469  
GTACACCA 0.684506514916  
GTACACGA 0.880962003741  
GTACACTA 0.198121329113  
GTACAGAA -0.591261302553  
GTACAGAC -0.626567457204  
GTACAGCA 0.297741576111  
GTACAGGA -0.514710716042  
GTACAGTA 1.95340654044  
GTACATAA 0.644051494  
GTACATAC 1.52784409389

GTACATCA -0.549783086809  
GTACATGA 0.526163628246  
GTACATTA 2.4453209337  
GTACCAAA -0.114603233404  
GTACCAAC -0.127732186618  
GTACCACA -0.197238238073  
GTACCAGA 0.169717523949  
GTACCATA 2.11017622603  
GTACCCAA -0.787598129922  
GTACCCAC -0.461139648949  
GTACCCCA -0.26786553619  
GTACCCGA -0.0795104611941  
GTACCCTA 0.474052929763  
GTACCGAA 0.393015066645  
GTACCGAC -1.56493808113  
GTACCGCA 0.435615361763  
GTACCGGA -0.948506393982  
GTACCGTA 1.76405075384  
GTACCTAA 0.0511903435827  
GTACCTAC -0.747760981286  
GTACCTCA -1.1868785214  
GTACCTGA 0.183231190091  
GTACCTTA 0.556135013686  
GTACGAAA 1.35710483236  
GTACGAAC 0.880055388588  
GTACGACA 0.128957522276  
GTACGAGA 1.51397361067  
GTACGATA 2.40197765133  
GTACGCAA 1.68598629698  
GTACGCAC 0.706184089174  
GTACGCCA -0.693038273543  
GTACGCGA 1.06952192588  
GTACGCTA 0.047595734203  
GTACGGAA 0.20604666525  
GTACGGAC -0.0274520153868  
GTACGGCA -0.385072243556  
GTACGGGA 0.5891212328  
GTACGGTA 1.32352634686  
GTACGTAA 0.370628021792  
GTACGTAC 0.757024277375  
GTACGTCA -0.100651560768  
GTACGTGA 0.047595734203  
GTACGTTA 1.70718984995  
GTACTAAA 0.703494429523  
GTACTAAC 0.516588481526  
GTACTACA 1.81673102731  
GTACTAGA 1.39149708563  
GTACTATA 1.1691003291  
GTACTCAA 0.401855553233  
GTACTCAC 0.630523671755  
GTACTCCA 0.0318143851992  
GTACTCGA 0.108902279106  
GTACTCTA 0.476082873358  
GTACTGAA 0.560927271051



GTACTGAC 0.0573230590351  
GTACTGCA -0.0769188533776  
GTACTGGA 0.612687814153  
GTACTGTA 2.72508467482  
GTACTTAA -0.608116433637  
GTACTTCA -0.322351961913  
GTACTTGA 0.301995693367  
GTACTTTA 1.09574860561  
GTAGAAAA 2.35508097882  
GTAGAAAC 1.02090382956  
GTAGAACA 0.38227849491  
GTAGAAGA 0.757195399684  
GTAGAATA 1.35609558546  
GTAGACAA 0.30405499006  
GTAGACAC 0.528247489941  
GTAGACCA 0.0540375939728  
GTAGACGA 0.548285662516  
GTAGACTA 1.2895067322  
GTAGAGAA 0.379737266167  
GTAGAGAC 0.038676139978  
GTAGAGCA -0.405060869769  
GTAGAGGA -0.291745217243  
GTAGAGTA 1.69695540353  
GTAGATAA 0.306757973102  
GTAGATAC 4.87537908978  
GTAGATCA 0.294496497579  
GTAGATGA 1.08581435185  
GTAGATTA 4.18941220625  
GTAGCAA 0.127367458776  
GTAGCAAC -0.099439964857  
GTAGCACA -0.12099783677  
GTAGCAGA 1.84751347421  
GTAGCATA -0.310108597875  
GTAGCCAA -0.481621657001  
GTAGCCAC -0.94244924714  
GTAGCCCA -1.12029612166  
GTAGCCGA 0.0613129984207  
GTAGCCTA -0.666410643002  
GTAGCGAA 0.820020811213  
GTAGCGAC 0.0542578462878  
GTAGCGCA -0.56342436606  
GTAGCGGA -0.147794716017  
GTAGCGTA 0.532927747547  
GTAGCTAA -0.522518431615  
GTAGCTAC 0.0910666296818  
GTAGCTCA -0.641040407531  
GTAGCTGA 0.432644870002  
GTAGCTTA 0.353787671346  
GTAGGAAA 0.341702522581  
GTAGGAAC -0.347863966597  
GTAGGACA -0.0153926806935  
GTAGGAGA 0.481440542148  
GTAGGATA 1.06671277206  
GTAGGCAA 0.197384795379

GTAGGCAC 0.003685583162  
GTAGGCCA -1.26858255409  
GTAGGCCG 0.978167594215  
GTAGGCTA -1.20968900029  
GTAGGGAA -0.387707152395  
GTAGGGAC -0.589127686318  
GTAGGGCA -1.33455998859  
GTAGGGGA 0.670540894354  
GTAGGGTA 0.318696356382  
GTAGGTAA 0.830356432136  
GTAGGTCA -1.00849850305  
GTAGGTGA 0.692789292665  
GTAGGTTA 0.465268651233  
GTAGTAAA 0.948437278889  
GTAGTAAC 0.554499983741  
GTAGTACA 0.456253086953  
GTAGTAGA 1.72483897189  
GTAGTATA 1.29746391957  
GTAGTCAA 0.206372671985  
GTAGTCAC 0.68323850277  
GTAGTCCA -0.469627065663  
GTAGTCGA 0.825994895036  
GTAGTCTA 0.0723734951105  
GTAGTGAA -0.341014286141  
GTAGTGAC 0.177702398992  
GTAGTGCA -0.036979072991  
GTAGTGGA -0.0168045438321  
GTAGTGTA 1.07078993803  
GTAGTTAA 0.506391298967  
GTAGTTCA -0.372859273505  
GTAGTTGA 1.2145507891  
GTAGTTTA 1.52448077026  
GTATAAAA 1.7842773275  
GTATAAAC 2.61540776541  
GTATAACA 1.84006236753  
GTATAAGA 1.63342926488  
GTATAATA 0.847554224194  
GTATACAA 0.725519869205  
GTATACAC 1.72702379991  
GTATACCA -0.0494085481532  
GTATACGA 3.46822410469  
GTATACTA 1.47646618194  
GTATAGAA -0.091455297992  
GTATAGAC 1.29894573051  
GTATAGCA -0.127732811152  
GTATAGGA 0.535916142615  
GTATAGTA 1.13132330987  
GTATATAA 1.23837925837  
GTATATAC 2.11952341785  
GTATATCA 1.71193922265  
GTATATGA 2.02793946586  
GTATATTA 2.24672329334  
GTATCAAA 1.41168910174  
GTATCAAC 1.49437282006

GTATCACA 1.71251712475  
GTATCAGA 2.40559974021  
GTATCATA 1.98170584026  
GTATCCAA 3.55301083708  
GTATCCAC 3.38110806876  
GTATCCCA 3.20674026483  
GTATCCGA 4.39870499092  
GTATCCTA 1.87424644281  
GTATCGAA 0.764062775268  
GTATCGAC 0.27240340005  
GTATCGCA 1.56807011902  
GTATCGGA 2.65207602866  
GTATCGTA 1.56982901487  
GTATCTAA 3.06699641628  
GTATCTCA 2.70670901169  
GTATCTGA 5.38736246595  
GTATCTTA 3.09346541519  
GTATGAAA 2.01483778396  
GTATGAAC -0.614701728043  
GTATGACA 0.436104580043  
GTATGAGA 0.10618618085  
GTATGATA 0.644185560627  
GTATGCAA -0.436789485636  
GTATGCAC 1.02366489426  
GTATGCCA -0.326009232868  
GTATGCCG 2.21815232125  
GTATGCTA -0.694107475707  
GTATGGAA 0.953149387727  
GTATGGAC 0.281421878821  
GTATGGCA -0.962216788326  
GTATGGGA 1.42016839951  
GTATGGTA 0.576906180969  
GTATGTAA -0.0639148069588  
GTATGTCA -0.36006423779  
GTATGTGA 1.36902968407  
GTATGTTA 1.40116487156  
GTATTTAA 1.76722172101  
GTATTTAAC 1.03976413106  
GTATTTACA 2.69219192763  
GTATTTAGA 1.86241443848  
GTATTTATA 2.27442949406  
GTATTTCAA 0.035481856876  
GTATTTCAC 1.40336989284  
GTATTTCCA 1.46817237076  
GTATTTCGA 1.47443811195  
GTATTTCTA 1.12591963374  
GTATTTGAA -0.187756563271  
GTATTTGAC 0.171999154736  
GTATTTGCA 0.388601901403  
GTATTTGGA 0.740700832881  
GTATTTGTA 1.06815419648  
GTATTTTAA -0.345167437072  
GTATTTTCA 1.62230714751  
GTATTTTGA 1.82171564114

GTATTTTA 3.40101342377  
GTCAAAAA 0.864250515471  
GTCAAAAC 1.06953858012  
GTCAAACA 1.19751475134  
GTCAAAGA 0.865644475302  
GTCAAATA 1.01851207262  
GTCAACAA 1.12422048498  
GTCAACAC -0.328193019999  
GTCAACCA -0.676309090144  
GTCAACGA -0.432341138313  
GTCAACTA -0.670533399947  
GTCAAGAA 0.359786111993  
GTCAAGAC -0.491643553691  
GTCAAGCA -0.549529109659  
GTCAAGGA 0.0989043228848  
GTCAAGTA 0.161383742592  
GTCAATAA -0.419987856295  
GTCAATCA -0.429885470725  
GTCAATGA 1.2356604538  
GTCAATTA -0.199875853225  
GTCACAAA 0.233039439988  
GTCACAAC 0.440160095496  
GTCACACA 0.39927289707  
GTCACAGA 0.61488034476  
GTCACATA 0.0766898575869  
GTCACCAA -0.540439642193  
GTCACCAC -0.730211784778  
GTCACCCA 0.317779540507  
GTCACCGA -0.64342654367  
GTCACCTA -0.104304876341  
GTCACGAA -0.298052802208  
GTCACGAC -0.632971844935  
GTCACGCA -0.127994490887  
GTCACGGA -0.0761381859093  
GTCACGTA -0.40069600182  
GTCACTAA -0.299536694931  
GTCACTCA -0.674977791888  
GTCACTGA 0.352031481809  
GTCACTTA -0.00738282429153  
GTCAGAAA 0.86352397428  
GTCAGAAC 0.279056560481  
GTCAGACA 0.302824449952  
GTCAGAGA -0.64729678071  
GTCAGATA 1.4303189502  
GTCAGCAA -0.016831190615  
GTCAGCAC 0.13907434813  
GTCAGCCA -1.67070207702  
GTCAGCGA 0.788147303464  
GTCAGCTA -0.931503664702  
GTCAGGAA 0.228292565425  
GTCAGGAC -0.608941026661  
GTCAGGCA 0.000329337582597  
GTCAGGGA 0.178246159906  
GTCAGGTA -1.23298890563

GTCAGTAA 0.34935410466  
GTCAGTCA -0.833372306699  
GTCAGTGA -0.25524932537  
GTCAGTTA 0.381013605434  
GTCATAAA 0.571561419215  
GTCATAAC 0.00554024088852  
GTCATACA -0.378214027803  
GTCATAGA -0.187265679567  
GTCATATA 0.603826509765  
GTCATCAA -0.542559310503  
GTCATCAC 0.599752882827  
GTCATCCA 0.230176576248  
GTCATCGA -0.0381228028765  
GTCATCTA -0.373959286013  
GTCATGAA -0.10374008945  
GTCATGAC 1.40354413782  
GTCATGCA -0.725302947738  
GTCATGGA -0.0758683872323  
GTCATGTA -0.121966697142  
GTCATTAA 0.0700456488093  
GTCATTCA 0.741082423139  
GTCATTGA 0.759036525841  
GTCATTTA 0.587300508086  
GTCCAAAA 2.0243011391  
GTCCAAAC 0.50303172254  
GTCCAACA 0.208873306019  
GTCCAAGA -0.470075897413  
GTCCAATA 0.350971647654  
GTCCACAA 0.153602465625  
GTCCACAC -0.459281868552  
GTCCACCA -0.825300205078  
GTCCACGA -0.624364101342  
GTCCACTA 0.649148107589  
GTCCAGAA 0.268091617489  
GTCCAGAC -0.83606092546  
GTCCAGCA -0.251172575762  
GTCCAGGA 0.427718337833  
GTCCAGTA -0.311554602204  
GTCCATAA 0.0453224305355  
GTCCATCA -0.321364365521  
GTCCATGA -0.104127508692  
GTCCATTA -0.604294910246  
GTCCCAAA 1.00255710317  
GTCCCAAC -0.555380993001  
GTCCACA -0.0566073431002  
GTCCAGA 0.28836440666  
GTCCATA -1.01359553299  
GTCCCAA -0.809656669905  
GTCCCCAC -1.41587764293  
GTCCCCCA -0.870066592198  
GTCCCCGA -0.329997923186  
GTCCCTA -1.07449675534  
GTCCCGAA -0.515223874791  
GTCCCGAC -0.599180809707

GTCCCGCA -0.758554801968  
GTCCCGGA -1.09425846755  
GTCCCGTA -0.99139480744  
GTCCCTAA -1.27328696034  
GTCCCTCA -0.242736370833  
GTCCCTGA 0.11150866756  
GTCCCTTA -0.933280672037  
GTCCGAAA -0.46155309044  
GTCCGAAC 0.284374883631  
GTCCGACA 0.800568451506  
GTCCGAGA -1.14957968701  
GTCCGATA 0.5437577912  
GTCCGCAA 0.657516446492  
GTCCGCAC -1.07270642462  
GTCCGCCA -0.923665763321  
GTCCGCGA 0.0779732749046  
GTCCGCTA -0.633971099295  
GTCCGGAA -0.698435496151  
GTCCGGAC 0.260886369024  
GTCCGGCA -0.710570191277  
GTCCGGGA 0.0130315259136  
GTCCGGTA -1.53796404242  
GTCCGTAA 0.800689194742  
GTCCGTCA -1.42327774599  
GTCCGTGA 0.953466026452  
GTCCGTTA -0.651361247817  
GTCCTAAA -0.0125851922998  
GTCCTAAC -0.27259617287  
GTCCTACA 0.497116136732  
GTCCTAGA -1.15383609423  
GTCCTATA -0.0358830158656  
GTCCTCAA -0.614932805613  
GTCCTCAC -0.186952996223  
GTCCTCCA -1.19596528255  
GTCCTCGA -0.275407200289  
GTCCTCTA -0.592880510971  
GTCCTGAA -0.187187404642  
GTCCTGCA -0.849168852697  
GTCCTGGA 0.153073693526  
GTCCTGTA -0.490843733848  
GTCCTTAA -0.192908552205  
GTCCTTCA -0.39662362395  
GTCCTTGA -0.387815613129  
GTCCTTTA 0.506299908829  
GTCGAAAA 1.53145889654  
GTCGAAAC -0.223529036623  
GTCGAACA 0.445296679259  
GTCGAAGA -0.443633128929  
GTCGAATA 0.524298769798  
GTCGACAA -0.108020228956  
GTCGACAC -0.662447766756  
GTCGACCA -0.847032113792  
GTCGACGA -0.0553391227758  
GTCGACTA 0.494509123744

GTCGAGAA -0.65930677722  
GTCGAGAC -0.658035642403  
GTCGAGCA -0.97670556018  
GTCGAGGA -0.48630358003  
GTCGAGTA 1.16373454137  
GTCGATAA 0.258813540763  
GTCGATCA -0.647538267181  
GTCGATGA 0.0818387238513  
GTCGATTA 1.25840785476  
GTCGCAAA 0.761059391384  
GTCGCAAC 1.02867719576  
GTCGCACA -0.318858527037  
GTCGCAGA -0.584590238814  
GTCGCATA 0.441307364408  
GTCGCCAA -0.687429125739  
GTCGCCAC -0.601191809105  
GTCGCCCA -0.253806027355  
GTCGCCGA -0.83482538908  
GTCGCCTA 1.05520594176  
GTCGCGAA 0.494321139018  
GTCGCGAC -1.21165086968  
GTCGCGCA -0.219043217261  
GTCGCGGA -0.378411796895  
GTCGCGTA -0.228429338365  
GTCGCTAA -0.808456315605  
GTCGCTCA -1.49102781609  
GTCGCTGA 0.569969690291  
GTCGCTTA -0.987780421151  
GTCGGAAA 1.06296348644  
GTCGGAAC -0.319500547963  
GTCGGACA -0.697884032652  
GTCGGAGA -0.69771832297  
GTCGGATA 2.51068570037  
GTCGGCAA -0.332440267382  
GTCGGCAC -1.03960508307  
GTCGGCCA -1.45209103727  
GTCGGCGA -0.782373486869  
GTCGGCTA 0.0598948899424  
GTCGGGAA -0.237740931748  
GTCGGGCA -0.728680843828  
GTCGGGGA 0.234435481599  
GTCGGGTA -0.382093216498  
GTCGGTAA -0.436343984734  
GTCGGTCA -1.0138763651  
GTCGGTGA 0.0825575624561  
GTCGGTTA 1.62957609844  
GTCGTA AA -0.0154926061295  
GTCGTAAC 0.0556555533229  
GTCGTACA -0.273941002695  
GTCGTAGA -0.290115599925  
GTCGTATA 0.875042046196  
GTCGTCAA -0.633154208856  
GTCGTCCAC -0.759198488318  
GTCGTCCA -0.273441167337

GTCTGCGA -0.434042785215  
GTCTGCTA 0.146149693528  
GTCTGCAA -1.1337190222  
GTCTGCGA 0.0495309568122  
GTCTGGGA 0.148510848308  
GTCTGTGA -0.592880510971  
GTCTTTAA -0.626643025815  
GTCTTTCA 0.743827458136  
GTCTTTGA -0.385276674344  
GTCTTTTA 0.388109768631  
GTCTAAAA 0.417485556837  
GTCTAAAC 0.155156722509  
GTCTAACA -0.148460677412  
GTCTAAGA -0.250844903603  
GTCTAATA 1.47967087394  
GTCTACAA -0.325640966001  
GTCTACAC 0.15488505023  
GTCTACCA -0.29096704791  
GTCTACGA -0.425392365133  
GTCTACTA 2.09147642977  
GTCTAGAA 0.00903034491648  
GTCTAGAC 0.76548567184  
GTCTAGCA -0.460542594469  
GTCTAGGA -0.893491196161  
GTCTAGTA 0.34837983166  
GTCTATAA -0.578181062989  
GTCTATCA 0.540447136601  
GTCTATGA -0.131253309166  
GTCTATTA 0.977364651701  
GTCTCAA 0.499191879486  
GTCTCAAC -0.282193594635  
GTCTCACA -0.203125928029  
GTCTCAGA 0.142177241094  
GTCTCATA 0.105768159443  
GTCTCCAA -1.08340781427  
GTCTCCAC -0.786615529802  
GTCTCCCA -0.617937646743  
GTCTCCGA -0.59982928415  
GTCTCCTA -0.474796541549  
GTCTCGAA -0.238778490858  
GTCTCGCA -0.2987916259  
GTCTCGGA -0.958774981592  
GTCTCGTA -0.268870203178  
GTCTCTAA -0.566702128536  
GTCTCTCA -0.543322907376  
GTCTCTGA 0.733337160965  
GTCTCTTA -0.741776280385  
GTCTGAAA 0.700135061274  
GTCTGAAC -0.428762974994  
GTCTGACA -0.134192782407  
GTCTGAGA 1.05191090051  
GTCTGATA 1.18996163745  
GTCTGCAA 0.00232576452135  
GTCTGCAC 0.209614419669



GTCTGCCA -0.65561578143  
GTCTGCGA -0.373872267612  
GTCTGCTA 0.607862248309  
GTCTGGAA -1.04095324375  
GTCTGGCA -0.538958663961  
GTCTGGGA -0.237531921045  
GTCTGGTA -1.25827566173  
GTCTGTAA -0.883855053289  
GTCTGTCA -0.461073864703  
GTCTGTGA 0.399485654978  
GTCTGTTA 1.05261246034  
GTCTTAAA -0.447816673847  
GTCTTAAC 0.474419323028  
GTCTTACA 0.80722140376  
GTCTTAGA -0.425493955993  
GTCTTATA 1.28376330959  
GTCTTCAA -0.429161011314  
GTCTTCAC -0.304426795952  
GTCTTCCA -0.483858737698  
GTCTTCGA -1.0512715859  
GTCTTCTA -0.402627685404  
GTCTTGAA -0.740201830235  
GTCTTGCA 0.438068531215  
GTCTTGGA 1.77432870946  
GTCTTGTA 0.206235066333  
GTCTTTAA -0.325629516212  
GTCTTTCA 0.0285401617485  
GTCTTTGA 0.332624921261  
GTCTTTTA 1.11323972046  
GTGAAAAA 1.81396767265  
GTGAAAAC 0.882333688527  
GTGAAACA 0.391275531348  
GTGAAAGA 0.955915032344  
GTGAAATA 2.41244275897  
GTGAACAA -0.186005578184  
GTGAACAC 1.18520976662  
GTGAACCA -0.313925749528  
GTGAACGA 1.04510722739  
GTGAACTA -0.0677340403914  
GTGAAGAA 0.586318324322  
GTGAAGCA -0.833797822514  
GTGAAGGA -0.278925200168  
GTGAAGTA 0.284884711532  
GTGAATAA 0.729155073293  
GTGAATCA 0.642881533688  
GTGAATGA 1.32150223225  
GTGAATTA 1.28315751163  
GTGACAAA 1.2338320265  
GTGACAAC -0.245897761812  
GTGACACA 0.0330307692037  
GTGACAGA 0.419320021299  
GTGACATA 0.887547506325  
GTGACCAA -0.15500329533  
GTGACCAC 0.0504527689587

GTGACCCA -0.458876337825  
GTGACCGA -0.247232182738  
GTGACCTA -1.01573768452  
GTGACGAA -0.0654061940901  
GTGACGCA -0.320891385124  
GTGACGGA -0.495581032223  
GTGACGTA 0.23411613656  
GTGACTAA 0.390052693826  
GTGACTCA -0.490735064936  
GTGACTGA -0.322462712604  
GTGACTTA -0.756199476172  
GTGAGAAA 0.369400604354  
GTGAGAAC 0.191170057798  
GTGAGACA 0.151170946684  
GTGAGAGA 0.0195656085337  
GTGAGATA 1.84836492219  
GTGAGCAA 0.768877932212  
GTGAGCAC 2.19549506137  
GTGAGCCA -0.600775036766  
GTGAGCGA 0.273651010753  
GTGAGCTA -0.7871755286  
GTGAGGAA 0.695729182261  
GTGAGGCA -0.458266376309  
GTGAGGGA 0.203714655389  
GTGAGGTA 0.220362441194  
GTGAGTAA 0.539670632693  
GTGAGTCA -0.660306031579  
GTGAGTGA -0.455983496454  
GTGAGTTA 0.837565635983  
GTGATAAA -0.447816673847  
GTGATAAC 0.890585655933  
GTGATACA 2.68796050177  
GTGATAGA 0.657879092554  
GTGATATA 2.19710136275  
GTGATCAA 0.733752892414  
GTGATCAC 4.41115840655  
GTGATCCA 0.654822623282  
GTGATCGA 0.118383953908  
GTGATCTA 0.741403849958  
GTGATGAA -0.0798520812782  
GTGATGCA 0.84285523057  
GTGATGGA -0.251237943651  
GTGATGTA 0.892461755993  
GTGATTAA 0.427718337833  
GTGATTCA 0.857177043675  
GTGATTGA 0.681031399703  
GTGATTTA 0.610683060094  
GTGCAAAA 0.785633970572  
GTGCAAAC 0.270494199689  
GTGCAACA -0.197900244086  
GTGCAAGA 1.35475242106  
GTGCAATA 1.52394200562  
GTGCACAA 0.569830627393  
GTGCACAC 0.814432064852

GTGCACCA -0.825415327507  
GTGCACGA -0.531117848089  
GTGCACTA -0.431306077339  
GTGCAGAA -0.449310767292  
GTGCAGCA -0.158967420644  
GTGCAGGA 0.177085775781  
GTGCAGTA 0.377669434178  
GTGCATAA 0.315233731849  
GTGCATCA -0.713982436736  
GTGCATGA -0.121750192031  
GTGCATTA 0.138063019447  
GTGCCAAA 0.100387174718  
GTGCCAAC -1.42560621683  
GTGCCACA -0.809197012899  
GTGCCAGA -0.00301670727523  
GTGCCATA -0.390665569833  
GTGCCCAA -0.569130732986  
GTGCCCAC -0.434203914981  
GTGCCCCA 0.534152666849  
GTGCCCGA -0.926753459291  
GTGCCCTA -1.34856099941  
GTGCCGAA -0.366201116802  
GTGCCGCA -0.641667647819  
GTGCCGGA 0.226799929226  
GTGCCGTA -0.248729190675  
GTGCCTAA 0.570644186984  
GTGCCTCA -1.3163891726  
GTGCCTGA -0.545160286329  
GTGCCTTA -1.15466651624  
GTGCGAAA 0.284966525482  
GTGCGAAC 0.889968824544  
GTGCGACA 0.442376982928  
GTGCGAGA 0.300404797156  
GTGCGATA 2.43117607189  
GTGCGCAA 0.927234350451  
GTGCGCAC 2.04365128342  
GTGCGCCA -1.1674961095  
GTGCGCGA -0.43432632364  
GTGCGCTA -0.254865653331  
GTGCGGAA -0.523218742378  
GTGCGGCA -0.972685434986  
GTGCGGGA -0.139671610788  
GTGCGGTA -0.0221189115998  
GTGCGTAA 1.32924832714  
GTGCGTCA -0.725757192115  
GTGCGTGA 0.235728683282  
GTGCGTTA 1.08065653394  
GTGCTAAA -0.160767535737  
GTGCTAAC -0.108414101716  
GTGCTACA 0.819876543865  
GTGCTAGA 0.0307574655362  
GTGCTATA -0.278978077378  
GTGCTCAA 0.180711611859  
GTGCTCCA -0.329389418917

GTGCTCGA -1.06865590544  
GTGCTCTA -0.869818860388  
GTGCTGAA 0.693955089417  
GTGCTGCA -0.126641750298  
GTGCTGGA -0.141051830871  
GTGCTGTA 0.670156181426  
GTGCTTAA 0.758384096015  
GTGCTTCA -0.651035241082  
GTGCTTGA -0.232957209681  
GTGCTTTA -0.353002423962  
GTGGAAAA 0.475412748404  
GTGGAAAC 0.0527221172443  
GTGGAAACA -0.180788845894  
GTGGAAGA 0.724030147497  
GTGGAATA 1.85545921179  
GTGGACAA 0.403438955037  
GTGGACAC 0.0866174496468  
GTGGACCA 0.169474163877  
GTGGACGA 0.726762899992  
GTGGACTA -0.176890088469  
GTGGAGAA 0.187341664534  
GTGGAGCA -0.85606745498  
GTGGAGGA -0.841110699001  
GTGGAGTA -0.0555685349225  
GTGGATAA 1.99394233442  
GTGGATCA 0.878626454854  
GTGGATGA 0.624413231348  
GTGGATTA 4.58442453255  
GTGGCAA 0.19735356868  
GTGGCAAC 0.0600291647469  
GTGGCACA -0.153037886912  
GTGGCAGA -0.636611628939  
GTGGCATA -0.0106612113021  
GTGGCCAA -0.932129447744  
GTGGCCAC -0.558291737679  
GTGGCCCA -0.763470925238  
GTGGCCGA 0.32738862024  
GTGGCCTA -0.969795924463  
GTGGCGAA -0.725331884478  
GTGGCGCA -1.11960184806  
GTGGCGGA -0.185603586482  
GTGGCGTA -0.807631930759  
GTGGCTAA -0.509505225364  
GTGGCTCA -0.675293597901  
GTGGCTGA -0.628908626897  
GTGGCTTA -0.54425845927  
GTGGGAAA -0.467255710162  
GTGGGAAC -0.912136657972  
GTGGGACA 0.865717337599  
GTGGGAGA 0.104126884158  
GTGGGATA 0.662650532119  
GTGGGCAA 0.524413892227  
GTGGGCCA -0.635160836516  
GTGGGCGA -0.536194892946

GTGGGCTA -0.488894355135  
GTGGGGAA 0.350202429975  
GTGGGGCA -0.663309623641  
GTGGGGGA 0.0859910420703  
GTGGGGTA -0.26786553619  
GTGGGTAA -0.437044503675  
GTGGGTCA -0.642106487026  
GTGGGTGA 0.40143711547  
GTGGGTTA 0.214412089662  
GTGGTAAA -0.254423899633  
GTGGTAAC 0.165118872116  
GTGGTACA -0.0822042844045  
GTGGTAGA -0.00276460372749  
GTGGTATA 0.903176677217  
GTGGTCAA -0.0721188934269  
GTGGTCCA -0.385072243556  
GTGGTCGA -0.254331052249  
GTGGTCTA -0.517247573047  
GTGGTGAA 1.16437885225  
GTGGTGCA -0.0416276875418  
GTGGTGGA 0.0912392092367  
GTGGTGTA 1.05450771278  
GTGGTTAA -0.3605503334  
GTGGTTCA 0.051182224641  
GTGGTTGA -0.39450916009  
GTGGTTTA 0.752944405097  
GTGTAAAA 0.308975693245  
GTGTAAAC 0.123257192512  
GTGTAACA 1.7073709648  
GTGTAAGA 1.01228421982  
GTGTAATA 2.69506644933  
GTGTACAA -0.0950811340704  
GTGTACAC 1.04261950039  
GTGTACCA 0.0968718811535  
GTGTACGA -0.308716719824  
GTGTACTA -0.13975529834  
GTGTAGAA 0.76027934845  
GTGTAGCA 0.717367619057  
GTGTAGGA -0.317260344596  
GTGTAGTA 0.603560874648  
GTGTATAA 1.18867176662  
GTGTATCA 1.06989976894  
GTGTATGA -0.0150300346323  
GTGTATTA 1.41140348153  
GTGTCAA 0.717059099273  
GTGTCAAC 0.580966692694  
GTGTCACA 0.814134370324  
GTGTCAGA 1.50356429474  
GTGTCATA 0.550775887651  
GTGTCCAA -0.282561653324  
GTGTCCCA -0.312889855842  
GTGTCCGA -0.40295764752  
GTGTCCTA 0.263120327052  
GTGTCGAA -0.3307261298

GTGTCGCA -0.277344712857  
GTGTCGGA -0.172190262132  
GTGTCGTA -0.00466984870595  
GTGTCTAA 0.289919079901  
GTGTCTCA 0.0712836833249  
GTGTCTGA 0.615216760394  
GTGTCTTA 0.25136659765  
GTGTGAAA -0.181925081372  
GTGTGAAC -0.769346957227  
GTGTGACA 1.05095411446  
GTGTGAGA 0.310183541952  
GTGTGATA 0.821169329192  
GTGTGCAA -0.102767065518  
GTGTGCCA -0.238452067767  
GTGTGCGA 0.600396152821  
GTGTGCTA 0.268019171548  
GTGTGGAA 0.571545597687  
GTGTGGCA -0.0736358864512  
GTGTGGGA 0.911168838489  
GTGTGGTA 0.0461851201324  
GTGTGTAA 0.8124329316  
GTGTGTCA -0.0810449411696  
GTGTGTGA -0.162604081978  
GTGTGTTA 1.18015562134  
GTGTTAAA -0.134236916141  
GTGTTAAC 0.616768102787  
GTGTTACA 2.73839953098  
GTGTTAGA 0.390520261595  
GTGTTATA 2.03284892744  
GTGTTCAA -0.503022562708  
GTGTTCCA -0.081599943695  
GTGTTCGA 0.265842670647  
GTGTTCTA 0.22262762592  
GTGTTGAA -0.150706085229  
GTGTTGCA 0.584308157636  
GTGTTGGA 0.269510975035  
GTGTTGTA 0.822461698163  
GTGTTTAA -0.0824792875313  
GTGTTTCA 0.373198603632  
GTGTTTGA 0.812852618431  
GTGTTTTA 0.641059768084  
GTTAAAAA 1.12120086321  
GTTAAAAC 0.530805372923  
GTTAAACA -0.0480674655318  
GTTAAAGA -0.0813517955291  
GTTAAATA 0.836213103572  
GTTAACAA 0.616280966287  
GTTAACCA 0.677948700005  
GTTAACGA 0.316591260531  
GTTAACTA 1.32557835732  
GTTAAGAA -0.559162754395  
GTTAAGCA 0.488144081654  
GTTAAGGA 0.718654991756  
GTTAAGTA 0.662036615222

GTTAATAA 0.347957230337  
GTTAATCA 1.77479398727  
GTTAATGA 1.99864674067  
GTTAATTA 0.411056187747  
GTTACAAA -0.205017016904  
GTTACAAC 1.2638369286  
GTTACACA 0.567027302559  
GTTACAGA 1.28234416022  
GTTACATA 0.978736336487  
GTTACCAA -0.327311178027  
GTTACCCA -0.205154414379  
GTTACCGA 0.226070265365  
GTTACCTA -0.161561318419  
GTTACGAA 0.0340870643327  
GTTACGCA 0.349140722219  
GTTACGGA 0.770555846824  
GTTACGTA 0.647910281251  
GTTACTAA -0.424068144929  
GTTACTCA 0.345732848497  
GTTACTGA -0.510622308467  
GTTACTTA 0.564880987466  
GTTAGAAA 0.240672077869  
GTTAGAAC -0.348887994137  
GTTAGACA -0.201073501211  
GTTAGAGA -0.338123942907  
GTTAGATA 1.2205941962  
GTTAGCAA 0.813780259561  
GTTAGCCA 0.207524312634  
GTTAGCGA 0.138029710968  
GTTAGCTA -0.763632263182  
GTTAGGAA -0.158929324072  
GTTAGGCA -0.367709366351  
GTTAGGGA 0.492938420798  
GTTAGGTA -0.333201366119  
GTTAGTAA 0.515224082969  
GTTAGTCA 0.557417390114  
GTTAGTGA 0.942068281416  
GTTAGTTA -0.0764566982364  
GTTATAAA 0.689161166629  
GTTATAAC 0.635410441928  
GTTATACA 1.55532275606  
GTTATAGA 0.72135672573  
GTTATATA 1.33240493002  
GTTATCAA 1.03072878987  
GTTATCCA 2.55466767282  
GTTATCGA 0.935966584484  
GTTATCTA 0.968216478042  
GTTATGAA 0.21435421618  
GTTATGCA 1.35003968768  
GTTATGGA 0.684185296275  
GTTATGTA 0.2660464769  
GTTATTAA -0.189505674756  
GTTATTCA 1.13828061835  
GTTATTGA 0.170966175542

GTTATTTA 0.805627176701  
GTTCAAAA 0.287689909968  
GTTCAAAC -0.13849394789  
GTTCAACA -0.346013888786  
GTTCAAGA -0.117075138875  
GTTCAATA 1.22452418032  
GTTCACAA -0.0848770816377  
GTTCACCA 1.96305975391  
GTTCACGA 0.00565161611399  
GTTCACTA 0.0796971968525  
GTTCAGAA -0.345432864012  
GTTCAGCA 0.344956344589  
GTTCAGGA -0.378957015055  
GTTCAGTA 0.771907754701  
GTTCATAA -0.127762372426  
GTTCATCA -0.0805328233105  
GTTCATGA 1.16329362038  
GTTCATTA 0.32560994748  
GTTCCAAA 0.179224388288  
GTTCCAAC -0.521581630653  
GTTCCACA -0.116184761606  
GTTCCAGA 0.304508193547  
GTTCCATA 0.196686982751  
GTTCCCAA -0.58689997363  
GTTCCCCA -0.142287367251  
GTTCCCGA -0.237740931748  
GTTCCCTA -0.14714249437  
GTTCCGAA -0.6692653878  
GTTCCGCA -0.723785746535  
GTTCCGGA -0.864310470732  
GTTCCGTA -0.649538024967  
GTTCCCTAA -0.309124748687  
GTTCCCTCA 0.298605306597  
GTTCCCTGA 0.711373133791  
GTTCCCTTA 0.210982565429  
GTTCGAAA -0.294952615558  
GTTCGAAC 0.311007094087  
GTTCGACA -0.39339603237  
GTTCGAGA 1.34762565569  
GTTCGATA 1.461136371  
GTTCGCAA 0.00738782056333  
GTTCGCCA -0.787598129922  
GTTCGCGA 0.318595181878  
GTTCGCTA -0.0867902373798  
GTTCGGAA 0.363661345306  
GTTCGGCA -0.804931654031  
GTTCGGGA -0.264382302036  
GTTCGGTA 0.282428003054  
GTTCGTAA 1.29290565427  
GTTCGTCA 0.642172895805  
GTTCGTGA -0.0629093072597  
GTTCGTTA 0.332277472193  
GTTCTAAA 0.387196491782  
GTTCTACA 0.257440815087



GTTCTAGA 0.902852752262  
GTTCTATA 1.01178667442  
GTTCTCAA -0.485653440163  
GTTCTCCA -0.154657303508  
GTTCTCGA -0.83557691163  
GTTCTCTA 0.0733829501915  
GTTCTGAA -0.262886543167  
GTTCTGCA 0.124550602373  
GTTCTGGA -0.30182852644  
GTTCTGTA 0.0357139753365  
GTTCTTAA -0.827627218667  
GTTCTTCA 0.970064265894  
GTTCTTGA 0.0720331240944  
GTTCTTTA 0.278979742802  
GTTGAAAA 1.23902523468  
GTTGAAAC 0.453178922553  
GTTGAACA -0.108876673213  
GTTGAAGA 0.51325367828  
GTTGAATA 1.09532829424  
GTTGACAA 1.39476006747  
GTTGACCA -0.188116503018  
GTTGACGA 0.127995115421  
GTTGACTA -0.544092749589  
GTTGAGAA 0.467643129404  
GTTGAGCA -0.609263702548  
GTTGAGGA -0.295759721631  
GTTGAGTA 0.384740407838  
GTTGATAA 0.177168006088  
GTTGATCA -0.195137305782  
GTTGATGA 1.20299357972  
GTTGATTA 1.35916829261  
GTTGCAA 1.03066571194  
GTTGCAAC -0.470149592422  
GTTGCACA -0.12845643785  
GTTGCAGA 1.41732739446  
GTTGCATA 0.207763717324  
GTTGCCAA 0.46626290932  
GTTGCCCA -1.0800315836  
GTTGCCGA -0.237943280756  
GTTGCCTA -0.105460056016  
GTTGCGAA 0.437755639694  
GTTGCGCA 0.519414081405  
GTTGCGGA 0.665191344506  
GTTGCGTA 1.43834088093  
GTTGCTAA 0.0191981743787  
GTTGCTCA -0.859008177288  
GTTGCTGA -0.628143780956  
GTTGCTTA 0.0616088193466  
GTTGGAAA 0.628098606332  
GTTGGACA -0.661312155812  
GTTGGAGA -0.00350571737732  
GTTGGATA 2.81756962116  
GTTGGCAA 0.552346798775  
GTTGGCCA -0.777805853557

GTTGGCGA -0.54760637773  
GTTGGCTA 0.206533385395  
GTTGGGAA 0.283616283029  
GTTGGGCA -0.12323762378  
GTTGGGGA 0.126434821374  
GTTGGGTA -0.803891804963  
GTTGGTAA 0.464961588695  
GTTGGTCA 0.611889659733  
GTTGGTGA -0.106156619576  
GTTGGTTA 0.23033395881  
GTTGTAAA 1.14955553837  
GTTGTACA 0.273194892774  
GTTGTAGA 0.836661935322  
GTTGTATA 1.13833536916  
GTTGTCAA 1.26056520328  
GTTGTCCA 0.164376509398  
GTTGTCTA -0.438351861462  
GTTGTCTA 0.258759414485  
GTTGTGAA 0.67045637409  
GTTGTGCA -0.668329003194  
GTTGTGGA 0.0313545200159  
GTTGTGTA 0.680638359655  
GTTGTTAA 0.0963122987123  
GTTGTTCA 0.279057185015  
GTTGTTGA 1.15674329988  
GTTGTTTA 0.399767111622  
GTTTAAAA 0.659717720575  
GTTTAAAC 1.13533281799  
GTTTAAACA 1.05404389221  
GTTTAAAGA 0.286497882788  
GTTTAAATA 1.75833106353  
GTTTACAA 0.571864734548  
GTTTACCA 0.591767175072  
GTTTACGA 0.45141919399  
GTTTACTA 0.0893845515102  
GTTTAGAA 0.126169186257  
GTTTAGCA -0.0781229548806  
GTTTAGGA 0.543092246161  
GTTTAGTA 0.375163803872  
GTTTATAA 0.308657597274  
GTTTATCA 0.701559831448  
GTTTATGA 0.829266620351  
GTTTATTA 0.282595378159  
GTTTCAAA 0.318381591259  
GTTTCACA -0.31110930948  
GTTTCAGA 0.750661941598  
GTTTCATA 0.811658093115  
GTTTCCAA 0.827436943983  
GTTTCCCA 0.00460427263862  
GTTTCCGA 1.39974343223  
GTTTCCTA -0.0902867949255  
GTTTCGAA -0.50740262765  
GTTTCGCA -0.577359176279  
GTTTCGGA -0.0308232497816

GTTTCGTA 0.281106697342  
GTTTCTAA 1.09247354945  
GTTTCTCA 0.297602513212  
GTTTCTGA 0.724374890251  
GTTTCTTA 0.0197683738975  
GTTTGAAA 0.318381591259  
GTTTGACA -0.0534469930108  
GTTTGAGA 0.432993151782  
GTTTGATA 1.02719684207  
GTTTGCAA 1.347707886  
GTTTGCCA -0.260223322121  
GTTTGCGA 0.0528513957771  
GTTTGCTA -0.42891057319  
GTTTGCAA -0.441552598082  
GTTTGCCA -0.123185162927  
GTTTGCGA 1.42575360685  
GTTTGCTA -1.17411596145  
GTTTGCTA 0.487908632345  
GTTTGCTA 1.78355703165  
GTTTGCTA 0.73188969939  
GTTTGCTA 1.42480847877  
GTTTAAA -0.175928722504  
GTTTACA 0.945349166562  
GTTTAGA 0.258201913824  
GTTTATA 0.230002123091  
GTTTCAA 0.592611961362  
GTTTCCA -0.0862427292621  
GTTTCCA -0.373724877594  
GTTTCTA -0.229862227481  
GTTTGAA 0.30040333991  
GTTTGCA 0.015725349124  
GTTTGGA 0.441707482507  
GTTTGTA 0.813943887462  
GTTTTAA 0.671572208124  
GTTTTCA 0.833406031534  
GTTTTGA 1.06721677098  
GTTTTTA 1.66812108628  
TAAAAAA 1.447263806  
TAAAAACA 1.08119404951  
TAAAAAGA 2.18294442661  
TAAAAATA 1.07000240069  
TAAAACAA 1.47769089306  
TAAAACCA 0.844209012048  
TAAAACGA 0.719921130301  
TAAAACAA 0.366458632978  
TAAAAGAA 1.47886647418  
TAAAAGCA 1.59418500716  
TAAAAGGA 1.15710115785  
TAAAAGTA -0.162875129723  
TAAAATA 1.47977038302  
TAAAATCA 2.95313221475  
TAAAATGA 1.47564804243  
TAAAATTA 1.16386944071  
TAAACAAA 1.26875721543

TAAACACA 0.447670116541  
TAAACAGA 2.17374087761  
TAAACATA -0.106229065517  
TAAACCAA 1.75019796575  
TAAACCCA 0.107283695222  
TAAACCGA -0.368752754445  
TAAACCTA -0.268372241422  
TAAACGAA 0.662985698686  
TAAACGCA 1.72937912571  
TAAACGGA 1.25019710659  
TAAACGTA -0.181925081372  
TAAACTAA 0.635909236396  
TAAACTCA 0.704850084604  
TAAACTGA 1.55955876183  
TAAACTTA -0.0815370739416  
TAAAGAAA 0.621161074764  
TAAAGACA 0.83148371596  
TAAAGAGA 0.766036718984  
TAAAGATA 2.28382997944  
TAAAGCAA 0.626362193704  
TAAAGCCA -0.355412292391  
TAAAGCGA 0.130919391668  
TAAAGCTA -0.464709068791  
TAAAGGAA 0.972931085016  
TAAAGGCA 0.616280966287  
TAAAGGGA 0.709093376605  
TAAAGGTA 0.557816259146  
TAAAGTAA 2.23702532161  
TAAAGTCA 0.343425403639  
TAAAGTGA 1.57359766105  
TAAAGTTA -0.0390841688414  
TAAATAAA 1.56740790483  
TAAATACA 1.22059461255  
TAAATAGA 0.555930374721  
TAAATATA 0.905449980884  
TAAATCAA 1.83142547902  
TAAATCCA 3.54901340329  
TAAATCGA 1.18291189795  
TAAATCTA 4.37569944926  
TAAATGAA 1.40587364955  
TAAATGCA 0.85857058715  
TAAATGGA 1.20159379091  
TAAATGTA 0.23769305081  
TAAATTAA 1.23572249084  
TAAATTCA 1.55250860597  
TAAATTGA 0.739615601011  
TAAATTTA 0.536274833295  
TAACAAA 2.38484814166  
TAACAACA -0.249138676785  
TAACAAGA 1.4479666149  
TAACAATA 1.19492314353  
TAACACAA 1.59182260332  
TAACACCA 0.436718288762  
TAACACGA 1.24997269072

TAACACTA 0.840141838628  
TAACAGAA 1.61446133536  
TAACAGCA 0.710588094585  
TAACAGGA 1.84211375346  
TAACAGTA 0.45270968936  
TAACATAA 1.5880674887  
TAACATCA 1.01745244664  
TAACATGA 0.45368188058  
TAACATTA 1.10037098973  
TAACCAA 0.650268521539  
TAACCACA -0.0237562315032  
TAACCAGA 0.241190441068  
TAACCATA 0.00377343427443  
TAACCCAA 0.144800491965  
TAACCCCA -0.477239302101  
TAACCCGA -0.498367286461  
TAACCCTA -0.280850013878  
TAACCGAA 1.0907723189  
TAACCGCA 0.905212449796  
TAACCGGA 0.303029088917  
TAACCGTA 0.61289849028  
TAACCTAA 1.12878312202  
TAACCTCA 0.505348327229  
TAACCTGA 0.484435182556  
TAACCTTA -0.181947564595  
TAACGAAA 2.4977634679  
TAACGACA -0.623242854679  
TAACGAGA 0.833156426122  
TAACGATA 0.705608060671  
TAACGCAA 1.84070938473  
TAACGCCA -0.859145991119  
TAACGCGA 0.912633995194  
TAACGCTA 0.168568381436  
TAACGGAA 1.02219349222  
TAACGGCA 0.521224813575  
TAACGGGA 0.381718496113  
TAACGGTA 0.5792952316  
TAACGTAA 3.10877336745  
TAACGTCA 0.769514956866  
TAACGTGA 0.240593802944  
TAACGTTA 0.524825876473  
TAACTAAA 1.17000569519  
TAACTACA 0.818512561664  
TAACTAGA 0.264130406666  
TAACTATA 0.0891534739396  
TAACTCAA 0.486530702219  
TAACTCCA -0.644965811739  
TAACTCGA -0.800979811218  
TAACTCTA 1.10314433694  
TAACTGAA 1.00595685795  
TAACTGCA 0.221631286052  
TAACTGGA 0.507864990969  
TAACTGTA 0.869810741446  
TAACTTAA 1.59768510374

TAAC TTCA 0.133928812713  
TAAC TTGA 0.721091923325  
TAAG AAAA 0.909224039692  
TAAG AACA 0.291298050917  
TAAG AAGA 0.163650384564  
TAAG AATA 2.17082222217  
TAAG ACAA 0.607385937065  
TAAG ACCA -0.269154157958  
TAAG ACGA 0.451155432475  
TAAG ACTA -0.392774412887  
TAAG AGAA 0.971144917848  
TAAG AGCA -0.226166235419  
TAAG AGGA 0.43750520157  
TAAG AGTA 0.398700615772  
TAAG ATAA 1.6813341434  
TAAG ATCA 1.61424545478  
TAAG ATGA 0.557417390114  
TAAG ATTA 1.38568225797  
TAAG CAAA 0.203845391168  
TAAG CACA -0.00396995429843  
TAAG CAGA -0.0865574943853  
TAAG CATA 1.27270822553  
TAAG CCAA 0.301173806657  
TAAG CCCA 0.455673311247  
TAAG CCGA -0.358700671946  
TAAG CCTA -0.911674919187  
TAAG CGAA 0.591139934784  
TAAG CGCA 0.00638814984802  
TAAG CGGA -0.129893906882  
TAAG CGTA -0.171485371453  
TAAG CTAA 0.259622520438  
TAAG CTCA 0.686803342696  
TAAG CTGA -0.517419944424  
TAAG CTTA -0.437595134463  
TAAG GAAA 0.996858438828  
TAAG GACA -0.251284575521  
TAAG GAGA -0.478365753213  
TAAG GATA 1.22773261953  
TAAG GCAA 0.908478970661  
TAAG GCCA 0.883592332664  
TAAG GCGA -1.13456755569  
TAAG GCTA -0.347312711275  
TAAG GGAA 0.235395598496  
TAAG GGCA -0.0673730597541  
TAAG GGGA 1.14249247547  
TAAG GGTA -0.49372595814  
TAAG GTAA 0.922178956105  
TAAG GTCA 0.0278556725123  
TAAG GTGA 0.504642603838  
TAAG TAAA 0.381855060875  
TAAG TACA -1.09355191144  
TAAG TAGA 0.943727460008  
TAAG TATA -0.202816783712  
TAAG TCAA 0.502458400351

TAAGTCCA -0.493232784478  
TAAGTCGA -0.908357602892  
TAAGTCTA 0.45580363067  
TAAGTGAA -0.0928394734576  
TAAGTGCA 0.177416154254  
TAAGTGGA 0.332961128717  
TAAGTGTA 0.621199379514  
TAAGTTAA 2.2465061637  
TAAGTTCA 0.632083341267  
TAAGTTGA -0.176890088469  
TAATAAAA 1.96632231939  
TAATAACA 0.983748013455  
TAATAAGA 0.589795937671  
TAATAATA 2.31383633879  
TAATACAA 2.01904964109  
TAATACCA 1.69068071069  
TAATACGA 2.94006613129  
TAATACTA 1.05478334044  
TAATAGAA 0.53389556703  
TAATAGCA 0.723783040221  
TAATAGGA 1.24445305945  
TAATAGTA 0.936891935656  
TAATATAA 2.36383486337  
TAATATCA 2.92684620429  
TAATATGA 2.82456252807  
TAATATTA 2.12789529578  
TAATCAAA 2.78571047769  
TAATCACA 3.21412662815  
TAATCAGA 2.23476617405  
TAATCATA 2.51851735641  
TAATCCAA 4.31580789016  
TAATCCCA 1.76066723695  
TAATCCGA 0.831363597259  
TAATCCTA 1.6112978626  
TAATCGAA 4.45124245429  
TAATCGCA 3.54761819439  
TAATCGGA 1.53245065649  
TAATCGTA 2.85015697124  
TAATCTAA 3.61581688806  
TAATCTCA 5.09355066579  
TAATCTGA 5.57961317571  
TAATGAAA 1.46725180768  
TAATGACA -0.482687944674  
TAATGAGA 0.319592770813  
TAATGATA 1.21416399439  
TAATGCAA 0.929213706795  
TAATGCCA 1.1722644264  
TAATGCGA -0.226841564824  
TAATGCTA 0.35958542841  
TAATGGAA -0.467454520144  
TAATGGCA 0.179038901697  
TAATGGGA 1.08941270844  
TAATGGTA 1.48619184135  
TAATGTAA 0.337540211819

TAATGTCA 1.37880822069  
TAATGTGA 0.886173323403  
TAATTAAA 0.670818187439  
TAATTACA 1.22872479583  
TAATTAGA 0.380265830088  
TAATTATA 0.881575296104  
TAATTCAA 0.355438106462  
TAATTCCA 1.56757028366  
TAATTCGA -0.294821671601  
TAATTCTA 0.145081324075  
TAATTGAA 0.439423561762  
TAATTGCA 2.97008289953  
TAATTGGA 2.29610852556  
TAATTGTA 0.262604461989  
TAATTTAA 1.97381339624  
TAATTTCA 2.64855657153  
TAATTTGA 0.505163048817  
TACAAAAA 2.41518862667  
TACAAACA 1.94603870497  
TACAAAGA 1.71150662878  
TACAAATA 2.15186553426  
TACAACAA 1.76828384512  
TACAACCA 0.263516281591  
TACAACGA 2.48430954885  
TACAACCTA 0.41048786183  
TACAAGAA 1.76062372775  
TACAAGCA 0.848356542174  
TACAAGGA 0.0893179345529  
TACAAGTA 0.808469430819  
TACAATAA 1.57988130554  
TACAATCA 2.43689472132  
TACAATGA 0.889357613961  
TACACAAA 0.463707316296  
TACACACA 2.47637921644  
TACACAGA 0.112266227271  
TACACATA 1.89404250438  
TACACCAA 0.657069696523  
TACACCCA 0.342571665696  
TACACCGA -0.314272157706  
TACACCTA -0.112865779887  
TACACGAA 1.54367207477  
TACACGCA 1.12000758696  
TACACGGA 0.0962873173533  
TACACGTA 1.85612288322  
TACTACTAA 0.61289849028  
TACTACTCA 0.115321447475  
TACTACTGA 0.833775755647  
TACAGAAA 0.484108759466  
TACAGACA 1.07995247597  
TACAGAGA 1.69110102205  
TACAGATA 1.98401515872  
TACAGCAA 0.440982606741  
TACAGCCA -0.244714061753  
TACAGCGA 0.36103955168



TACAGCTA -0.160027671155  
TACAGGAA 0.0415061115948  
TACAGGCA 1.09497543255  
TACAGGGA 0.443317531094  
TACAGGTA 1.20182028856  
TACAGTAA 1.37805857174  
TACAGTCA 0.358448568398  
TACAGTGA -0.567007109294  
TACATAAA 1.7329121144  
TACATACA 1.17254609122  
TACATAGA 1.9611055871  
TACATATA 0.531651616459  
TACATCAA 0.884499572351  
TACATCCA 0.914929365728  
TACATCGA -0.0376027742536  
TACATCTA 0.36439891993  
TACATGAA 0.280263368298  
TACATGCA 1.74494063875  
TACATGGA 0.711710173959  
TACATGTA 0.0804899386442  
TACATTAA 1.23006129854  
TACATTCA 1.42885004629  
TACATTGA 1.07160412215  
TACCAAAA 1.7332687233  
TACCAACA 0.496781386522  
TACCAAGA 0.695633628563  
TACCAATA 1.89879187708  
TACCACAA 0.606651901466  
TACCACCA 0.108147425709  
TACCACGA 1.09479181956  
TACCACTA 0.152487047946  
TACCAGAA 0.232556467047  
TACCAGCA -0.22541367198  
TACCAGGA -0.430792085878  
TACCAGTA -0.691097638306  
TACCATAA 0.869235545656  
TACCATCA 0.478525009377  
TACCATGA 0.303710247306  
TACCCAAA 0.865390081796  
TACCCACA -0.0909985554785  
TACCCAGA 1.14177363687  
TACCCATA 1.34943763693  
TACCCCAA 0.23612796867  
TACCCCCA -0.449329711489  
TACCCCGA -0.143317223775  
TACCCCTA -0.45752838533  
TACCCGAA 0.929289483584  
TACCCGCA 0.42021435395  
TACCCGGA -0.479503445937  
TACCCGTA 0.51265141935  
TACCCTAA 0.510016510511  
TACCCTCA 0.338108329558  
TACCCTGA -0.590667162565  
TACCGAAA 0.541970166787

TACCGACA -0.155429852034  
TACCGAGA 0.134927858895  
TACCGATA 2.15824285885  
TACCGCAA 0.882046611076  
TACCGCCA 0.838891521611  
TACCGCGA -0.0011941089594  
TACCGCTA -0.0156212601282  
TACCGGAA 0.310494559872  
TACCGGCA 0.538932641713  
TACCGGGA 0.423693840901  
TACCGGTA 1.62768875676  
TACCGTAA 3.03981919585  
TACCGTCA -0.370593880602  
TACCGTGA -0.0525661919287  
TACCTAAA 1.02061925025  
TACCTACA 0.582940428232  
TACCTAGA 0.620706414031  
TACCTATA 1.00774260876  
TACCTCAA 0.602085100866  
TACCTCCA 0.152487047946  
TACCTCGA -0.570868186503  
TACCTCTA -0.169910713125  
TACCTGAA 1.44167297786  
TACCTGCA 2.24693230405  
TACCTGGA 0.270375746412  
TACCTTAA 0.682197612812  
TACCTTCA -0.520922955487  
TACCTTGA 0.591482179402  
TACGAAAA 2.7824697709  
TACGAACA 1.49178475127  
TACGAAGA 0.35958542841  
TACGAATA 0.872547657501  
TACGACAA 1.37853925472  
TACGACCA -0.181803713603  
TACGACGA -0.143443379638  
TACGACTA -0.908545795796  
TACGAGAA 2.04787521486  
TACGAGCA -0.511001192411  
TACGAGGA 0.815659274112  
TACGAGTA 0.447710711249  
TACGATAA 1.1717081748  
TACGATCA 1.18045331587  
TACGATGA 0.153690524915  
TACGCAAA 1.14005596026  
TACGCACA 1.33183889406  
TACGCAGA 1.05586690688  
TACGCATA 1.90156564064  
TACGCCAA 0.832258346267  
TACGCCCA -0.388352920525  
TACGCCGA 0.673553021714  
TACGCCTA 0.704052971074  
TACGCGAA 2.06206108774  
TACGCGCA 0.879064461348  
TACGCGGA 0.38420018595

TACGCGTA 1.11504358275  
TACGCTAA 1.35288173362  
TACGCTCA 0.00648890799591  
TACGCTGA -0.539116462879  
TACGGAAA 1.12513938263  
TACGGACA 0.962129353569  
TACGGAGA 1.37103298088  
TACGGATA 1.3137009702  
TACGGCAA 0.737777805702  
TACGGCCA -0.592709388662  
TACGGCGA -0.963863268061  
TACGGCTA -0.922308859172  
TACGGGAA -0.179909085702  
TACGGGCA -0.459344738306  
TACGGGGA -1.08734133742  
TACGGTAA 1.46253511892  
TACGGTCA 0.501040291873  
TACGGTGA -0.05086204689  
TACGTAAA 2.03336687428  
TACGTACA 0.745009076416  
TACGTAGA 0.65418643134  
TACGTATA 0.0899830632359  
TACGTCAA 1.67917408856  
TACGTCCA -0.696659529705  
TACGTCGA 0.437896576194  
TACGTCTA -0.335690758542  
TACGTGAA 2.93569460165  
TACGTGCA 1.08361765769  
TACGTGGA 1.18597003265  
TACGTTAA 1.88522741551  
TACGTTCA 0.572722636051  
TACGTTGA 1.02182647442  
TACTAAAA 0.904321447992  
TACTAACA 1.02421739865  
TACTAAGA 1.77875207543  
TACTAATA -0.16659027416  
TACTACAA 1.39477172544  
TACTACCA 1.41687169284  
TACTACGA 0.503773668901  
TACTACTA 0.402597915951  
TACTAGAA 1.79244914638  
TACTAGCA 0.0868730922204  
TACTAGGA 0.510437862766  
TACTAGTA 1.3930192831  
TACTATAA 1.6931673968  
TACTATCA 1.92516761225  
TACTATGA 0.272868261505  
TACTCAA 1.23837925837  
TACTCACA 1.06207581548  
TACTCAGA 0.121655887401  
TACTCATA 0.189766105423  
TACTCCAA 0.399207945537  
TACTCCCA -0.407516745535  
TACTCCGA -0.00667085556051

TACTCCTA -0.608761160877  
TACTCGAA 0.917350059414  
TACTCGCA 0.915860337706  
TACTCGGA -0.424322746613  
TACTCTAA 0.965195399029  
TACTCTCA 0.59201407417  
TACTCTGA 0.0435341815882  
TACTGAAA 0.805977123904  
TACTGACA 0.978789630053  
TACTGAGA 1.13616823627  
TACTGATA 2.0808337463  
TACTGCAA 0.413334487686  
TACTGCCA 0.743909063908  
TACTGCGA -0.229164623031  
TACTGCTA -0.339701515727  
TACTGGAA -0.0731064898187  
TACTGGCA -0.25268915243  
TACTGGGA 1.09107438517  
TACTGTAA 2.32184203163  
TACTGTCA -0.0614268717821  
TACTGTGA 1.52309763569  
TACTTAAA 0.89582237331  
TACTTACA 1.28346186786  
TACTTAGA 0.104213069847  
TACTTATA 0.421814409993  
TACTTCAA 0.0395650600018  
TACTTCCA 0.609445233757  
TACTTCGA 0.153634941391  
TACTTCTA 0.406141938079  
TACTTGAA 0.917050074928  
TACTTGCA 1.61664116711  
TACTTGGA 0.459514403369  
TACTTTAA 2.02155194055  
TACTTTCA 0.00697666903006  
TACTTTGA 2.11830578478  
TAGAAAAA 0.524334992769  
TAGAAACA 1.22872479583  
TAGAAAGA 0.103265443629  
TAGAAATA 0.931298401202  
TAGAACAA 1.53713611854  
TAGAACCA 0.00478913469509  
TAGAACGA 1.58119761498  
TAGAACTA 0.531702411889  
TAGAAGAA 0.390901435497  
TAGAAGCA 1.45140904617  
TAGAAGGA 0.104863209714  
TAGAATAA 0.496026533125  
TAGAATCA 3.85608072889  
TAGAATGA 1.05436032276  
TAGACAAA 0.111608801174  
TAGACACA 1.14287677204  
TAGACAGA -0.790176206169  
TAGACATA 0.341308649821  
TAGACCAA 0.101486146336

TAGACCCA -0.457518184608  
TAGACCGA 0.488522549242  
TAGACCTA -0.326023180794  
TAGACGAA 0.23329008629  
TAGACGCA 1.36795132208  
TAGACGGA 0.497254366919  
TAGACTAA 0.180990778546  
TAGACTCA 0.123704150659  
TAGACTGA -0.51889113829  
TAGAGAAA 0.888586939036  
TAGAGACA 0.215584964466  
TAGAGAGA 0.117534795881  
TAGAGATA 2.26060231186  
TAGAGCAA 0.221052343058  
TAGAGCCA -1.23000134328  
TAGAGCGA 0.399361164539  
TAGAGCTA 0.138133591786  
TAGAGGAA 0.882619725087  
TAGAGGCA 0.815629296482  
TAGAGGGA 0.319363358667  
TAGAGTAA 2.14565849926  
TAGAGTCA 0.331983941225  
TAGAGTGA -0.0634060199475  
TAGATAAA 0.489393565959  
TAGATACA 1.21243736613  
TAGATAGA -0.0420061551304  
TAGATATA 1.76329548409  
TAGATCAA 0.822227289745  
TAGATCCA 1.03601193094  
TAGATCGA 0.818749051863  
TAGATCTA 1.29134806653  
TAGATGAA -0.0642487244572  
TAGATGCA 2.60449445056  
TAGATGGA -0.12473442354  
TAGATTAA 0.534047745141  
TAGATTCA 1.92262409355  
TAGATTGA 0.725715140161  
TAGCAAAA 1.73250387736  
TAGCAACA 0.263272713341  
TAGCAAGA 0.684097028807  
TAGCAATA 1.56807365804  
TAGCACAA 0.0608004642055  
TAGCACCA -1.01861990882  
TAGCACGA 0.152031970857  
TAGCACTA 0.787891244534  
TAGCAGAA -0.240173699757  
TAGCAGCA -0.200872193093  
TAGCAGGA -0.234651153998  
TAGCATAA -0.209734330192  
TAGCATCA 0.403073602662  
TAGCATGA -0.27077711358  
TAGCCAAA 0.499047195782  
TAGCCACA -0.373959286013  
TAGCCAGA -0.497049519775

TAGCCATA -0.196807725986  
TAGCCCAA 0.064574314836  
TAGCCCCA 0.517947675633  
TAGCCCGA -0.650160268984  
TAGCCCTA -0.126641750298  
TAGCCGAA 0.921192400603  
TAGCCGCA -0.413685892136  
TAGCCGGA -0.753268330052  
TAGCCTAA -0.784993823248  
TAGCCTCA 0.361081187279  
TAGCCTGA -0.255092567342  
TAGCGAAA 1.29239249552  
TAGCGACA 1.03064135511  
TAGCGAGA 1.46048893745  
TAGCGATA 1.95917723437  
TAGCGCAA 0.60494858914  
TAGCGCCA -0.778048797273  
TAGCGCGA -0.283865680263  
TAGCGCTA 0.364023783189  
TAGCGGAA 0.367746422033  
TAGCGGCA -0.222197946545  
TAGCGGGA -0.860385066524  
TAGCGTAA 1.17739039308  
TAGCGTCA -0.240305892782  
TAGCGTGA 0.36684292955  
TAGCTAAA -0.501850728794  
TAGCTACA -0.0494085481532  
TAGCTAGA -0.617166555463  
TAGCTATA 0.132667045907  
TAGCTCAA -0.446968556709  
TAGCTCCA -1.03217500238  
TAGCTCGA 0.295008199082  
TAGCTGAA 0.475179172697  
TAGCTGCA 0.307816558188  
TAGCTGGA -0.855034475786  
TAGCTTAA 0.275392003296  
TAGCTTCA -1.33517224006  
TAGCTTGA 0.433007724241  
TAGGAAAA 0.668910444325  
TAGGAACA 0.744121821816  
TAGGAAGA 0.874177274819  
TAGGAATA 1.85391265749  
TAGGACAA 0.669088436507  
TAGGACCA -0.404681985824  
TAGGACGA 0.607315989259  
TAGGACTA -0.344439646814  
TAGGAGAA 1.31312431716  
TAGGAGCA 0.0319971654758  
TAGGAGGA -0.80048934387  
TAGGATAA 1.2519668277  
TAGGATCA 1.28689742925  
TAGGATGA 0.53250660347  
TAGGCAAA 0.543210074904  
TAGGCACA 0.23318329098

TAGGCAGA 0.119584516385  
TAGGCATA 0.598400766772  
TAGGCCAA -0.0359435956612  
TAGGCCCA -0.817811001833  
TAGGCCGA 0.197847158698  
TAGGCCTA -0.619135502906  
TAGGCGAA 0.894005812156  
TAGGCGCA 0.972446863007  
TAGGCGGA -0.430394257736  
TAGGCTAA -0.485576414306  
TAGGCTCA 0.935146779553  
TAGGCTGA -0.178030279329  
TAGGGAAA 0.00399118845357  
TAGGGACA -0.888131029235  
TAGGGAGA 0.2295555813  
TAGGGATA -0.202206197663  
TAGGGCAA 0.640486862251  
TAGGGCCA -0.429370438373  
TAGGGCGA -0.699759091821  
TAGGGGAA 0.320269349286  
TAGGGGCA -0.442152567053  
TAGGGGGA -0.470659212145  
TAGGGTAA 1.54912175823  
TAGGGTCA -1.04407841176  
TAGGGTGA 0.340735119455  
TAGGTAAA 2.35120158195  
TAGGTACA -0.167314733571  
TAGGTAGA 0.567809427273  
TAGGTATA -0.36769396118  
TAGGTCAA -0.0180432028817  
TAGGTCCA -0.526991760297  
TAGGTCGA -0.544039456023  
TAGGTGAA -0.238302387792  
TAGGTGCA 0.397729049085  
TAGGTGGA 0.342178625648  
TAGGTTAA 0.384774549028  
TAGGTTCA -0.432237882029  
TAGGTTGA 0.83330069347  
TAGTAAAA 1.24495976468  
TAGTAACA 1.1940843944  
TAGTAAGA 0.478525009377  
TAGTAATA 0.452748410466  
TAGTACAA 0.299428234198  
TAGTACCA -0.458702509202  
TAGTACGA 3.31611011171  
TAGTACTA -0.300714774186  
TAGTAGAA 2.11940059284  
TAGTAGCA 0.600813341516  
TAGTAGGA 0.783772234794  
TAGTATAA 0.556120649405  
TAGTATCA 1.12946969303  
TAGTATGA 0.613749938266  
TAGTCAA 1.01851207262  
TAGTCACA -0.236940071015

TAGTCAGA 0.286440842018  
TAGTCATA 0.306759846703  
TAGTCCAA 0.100145688248  
TAGTCCCA 0.293481421692  
TAGTCCGA -0.142285910005  
TAGTCGAA 0.760203571661  
TAGTCGCA 0.594515540916  
TAGTCGGA 0.236474376848  
TAGTCTAA -0.440672005178  
TAGTCTCA 0.705429443954  
TAGTCTGA -0.15131125865  
TAGTGAAA 0.330363067383  
TAGTGACA 0.167423818838  
TAGTGAGA -0.112750865635  
TAGTGATA 0.337929921019  
TAGTGCAA 0.811503625045  
TAGTGCCA -0.346288267379  
TAGTGCGA 1.7450811589  
TAGTGGAA 1.77235497392  
TAGTGGCA 2.28951490404  
TAGTGGGA 1.31631360399  
TAGTGTA 2.17274745223  
TAGTGTCA -0.0764566982364  
TAGTGTGA 0.288239499865  
TAGTTAAA 0.719693799934  
TAGTTACA -0.331208686384  
TAGTTAGA 2.59475151238  
TAGTTATA -0.664433160261  
TAGTTCAA 0.929618821166  
TAGTTCCA 0.218460735241  
TAGTTCGA 0.355318195939  
TAGTTGAA -0.00533622645683  
TAGTTGCA 2.19165459378  
TAGTTGGA 0.664348431818  
TAGTTTAA 0.740512223621  
TAGTTTCA 0.70825129663  
TAGTTTGA 1.28304509552  
TATAAAAA 2.95255139815  
TATAAACA 2.32326638545  
TATAAAGA 2.6830529138  
TATAAATA 0.50168730907  
TATAACAA 1.71377368711  
TATAACCA 0.58136098181  
TATAACGA 3.13354967111  
TATAAGAA 2.96573177133  
TATAAGCA 1.28064938319  
TATAAGGA 0.931424765243  
TATAATA 1.29997246437  
TATAATCA 2.19999128963  
TATAATGA 1.18202630877  
TATACAAA 1.55532275606  
TATACACA 1.52877902125  
TATACAGA 1.43273818664  
TATACATA 2.12412123697



TATACCAA -0.0494085481532  
TATACCCA 1.01757173263  
TATACCGA 2.17175194508  
TATACGAA 2.50267667668  
TATACGCA 1.92911862235  
TATACGGA 0.984619446528  
TATACTAA 0.807880495281  
TATACTCA 2.99811947872  
TATACTGA 1.50800598037  
TATAGAAA 0.571130907128  
TATAGACA 1.50800598037  
TATAGAGA 0.530852212971  
TATAGATA 2.87253485626  
TATAGCAA 1.02422843209  
TATAGCCA 0.647291159905  
TATAGCGA 2.16500572908  
TATAGGAA 1.7560535963  
TATAGGCA 1.06866818794  
TATAGGGA 0.512056654828  
TATAGTAA 1.39150749453  
TATAGTCA 0.1227153052  
TATAGTGA 1.00128659289  
TATATAAA 2.34136829452  
TATATACA 2.99818318118  
TATATAGA 1.70387003552  
TATATATA 0.628366739585  
TATATCAA 2.19180031837  
TATATCCA 3.00442727186  
TATATCGA 1.54678537663  
TATATGAA 2.76200753975  
TATATGCA 3.13168835168  
TATATGGA 1.01907561044  
TATATTAA 1.7435241957  
TATATTCA 0.680106256709  
TATATTGA 2.75873352448  
TATCAAAA 2.68735553653  
TATCAACA 1.91857586433  
TATCAAGA 2.57394995111  
TATCAATA 1.8513349976  
TATCACAA 3.20254776826  
TATCACCA 1.26326402276  
TATCACGA 2.42672876546  
TATCAGAA 2.65186535253  
TATCAGCA 1.86836832904  
TATCAGGA 2.62099297274  
TATCATAA 1.82912011594  
TATCATCA 1.66947757407  
TATCATGA 2.79830607889  
TATCCAAA 3.67878490151  
TATCCACA 1.59191586706  
TATCCAGA 2.29332872484  
TATCCATA 2.86431057653  
TATCCCAA 2.0853514169  
TATCCCCA 2.12491522783

TATCCCGA 1.01097228212  
TATCCGAA 4.19371357991  
TATCCGCA 3.04538837347  
TATCCGGA 2.54371688593  
TATCCTAA 1.72774576119  
TATCCTCA 2.0487772501  
TATCCTGA 2.51395242942  
TATCGAAA 1.75522733785  
TATCGACA 1.95979739661  
TATCGAGA 1.14198743566  
TATCGATA 1.75140768806  
TATCGCAA 1.89617112434  
TATCGCCA 2.15586962975  
TATCGCGA 2.55971494822  
TATCGGAA 3.75563692976  
TATCGGCA 2.60394777515  
TATCGGGA 0.171023216312  
TATCGTAA 2.26898480687  
TATCGTCA 1.11563439189  
TATCGTGA 2.13503392729  
TATCTAAA 1.24672448951  
TATCTACA 2.80252980216  
TATCTAGA 2.79508681443  
TATCTCAA 0.69133870842  
TATCTCCA 3.83837290075  
TATCTCGA 3.07526649517  
TATCTGAA 2.52258640344  
TATCTGCA 4.73435890196  
TATCTGGA 3.78802921706  
TATCTTAA 4.2512820808  
TATCTTCA 1.69910588218  
TATCTTGA 2.70107300892  
TATGAAAA 3.9112293688  
TATGAACA 0.199051884735  
TATGAAGA 1.67016227149  
TATGAATA 0.938744927959  
TATGACAA 0.939849104026  
TATGACCA -0.664285145709  
TATGACGA 0.472153097412  
TATGAGAA 2.29416122863  
TATGAGCA 0.718923541365  
TATGAGGA 0.245662937038  
TATGATAA 1.22595935939  
TATGATCA 0.79080532006  
TATGATGA 0.886198929296  
TATGCAA 1.33098390705  
TATGCACA 1.71090353714  
TATGCAGA 0.995333743218  
TATGCATA 2.16751718837  
TATGCCAA 1.31472104235  
TATGCCCA 1.27763933761  
TATGCCGA 0.288402503233  
TATGCGAA 2.69628262516  
TATGCGCA 2.38843525663

TATGCGGA 0.0667443622196  
TATGCTAA -0.265088858139  
TATGCTCA -0.37838639918  
TATGCTGA -0.259904393438  
TATGGAAA 1.75522733785  
TATGGACA 1.62979260355  
TATGGAGA 0.0443448266873  
TATGGCAA 1.03483780707  
TATGGCCA -0.128376289323  
TATGGCGA 0.977082570523  
TATGGGAA 1.10892210891  
TATGGGCA 1.57593487536  
TATGGGGA 0.298023032755  
TATGGTAA 1.5697511563  
TATGGTCA 0.0539994974003  
TATGGTGA 1.42864207648  
TATGTAAA 1.30239565619  
TATGTACA 1.88636781454  
TATGTAGA 0.911085983649  
TATGTCAA -0.226630472341  
TATGTCCA 0.236944650931  
TATGT CGA 0.465063804089  
TATGTGAA 1.79439394518  
TATGTGCA 1.87424644281  
TATGTGGA 0.718486992117  
TATGTTAA 1.40840113854  
TATGTTCA 0.0834756273987  
TATGTTGA 0.419017746855  
TATTA AAA 3.34183362523  
TATTAACA 2.56838514522  
TATTAAGA 3.07128529926  
TATTAATA 1.15217795653  
TATTACAA 3.10463124995  
TATTACCA 1.14810953404  
TATTACGA 3.77194684268  
TATTAGAA 3.28350798099  
TATTAGCA 1.88969200071  
TATTAGGA 1.20945709001  
TATTATAA 3.05236816517  
TATTATCA 1.41897366602  
TATTATGA 0.964057498127  
TATTC AAA 1.02442016402  
TATTCACA 2.91200082354  
TATTCAGA 1.43522695453  
TATTCCAA 1.4312619965  
TATTCCCA 2.45224992997  
TATTC CGA 2.02406610615  
TATTCGAA 0.94501150186  
TATTCGCA 3.41118291866  
TATTCGGA 0.606579039169  
TATTCTAA -0.114456676098  
TATTCTCA 2.86321306216  
TATTCTGA 1.31513656562  
TATTGAAA 1.20829962037

TATTGACA 1.32065494782  
TATTGAGA 2.08608045622  
TATTGCAA 0.279499771425  
TATTGCCA 0.848576794489  
TATTGCGA 2.19331876864  
TATTGGAA 1.28399105631  
TATTGGCA 1.02421739865  
TATTGGGA 0.170887900617  
TATTGTAA 2.22746391464  
TATTGTCA 2.2828230225  
TATTGTGA 2.46966381079  
TATTTAAA 1.447263806  
TATTTACA 4.49985097442  
TATTTAGA 1.44223963835  
TATTTCAA 1.30469435757  
TATTTCCA 2.6321379897  
TATTTCGA 3.50110061401  
TATTTGAA 2.52122575208  
TATTTGCA 5.80067925851  
TATTTGGA 0.285487386817  
TATTTTAA 3.36269285181  
TATTTTCA 4.21409295621  
TATTTTGA 2.12492001593  
TCAAAAAA 1.32316307627  
TCAAAACA 0.706752623269  
TCAAAAGA 0.491738899211  
TCAAACAA 0.936813036198  
TCAAACCA -0.498982660604  
TCAAACGA 1.53971815017  
TCAAAGAA 0.965303859762  
TCAAAGCA 1.25545818079  
TCAAAGGA 0.847915204832  
TCAAATAA 1.09399491421  
TCAAATCA 2.42234432878  
TCAAATGA 1.11489723363  
TCAACAAA 3.10426631393  
TCAACACA 0.024399709675  
TCAACAGA 1.83710207649  
TCAACCAA -0.450259850755  
TCAACCCA -0.360383999185  
TCAACCGA 0.216153706739  
TCAACGAA -0.0108922888727  
TCAACGCA 0.54431029559  
TCAACGGA 1.38772219411  
TCAACTAA -0.201177382028  
TCAACTCA -0.383737822631  
TCAACTGA -0.209621497721  
TCAAGAAA -0.348860930998  
TCAAGACA 0.297102886033  
TCAAGAGA -0.5444397823  
TCAAGCAA -0.12522468271  
TCAAGCCA -1.18521601196  
TCAAGCGA 0.782795463658  
TCAAGGAA 2.2234129791

TCAAGGCA 0.380543955885  
TCAAGGGA 1.18056031936  
TCAAGTAA 0.831626109707  
TCAAGTCA 0.0163756971695  
TCAAGTGA 0.636067451669  
TCAATAAA 0.990862496316  
TCAATACA 0.894410301993  
TCAATAGA 0.498282766197  
TCAATCAA 0.570089808993  
TCAATCCA 0.0763359550013  
TCAATCGA -0.250869260428  
TCAATGAA 0.384740407838  
TCAATGCA 1.05588918193  
TCAATGGA 1.91106084701  
TCAATTAA 0.431555890929  
TCAATTCA 0.65874906838  
TCAATTGA 1.12112133922  
TCACAAAA 1.6637035493  
TCACAACA 2.02351380994  
TCACAAGA 1.79409375251  
TCACACAA 0.882333688527  
TCACACCA 1.00400831195  
TCACACGA 0.00311725724513  
TCACAGAA 0.414876253891  
TCACAGCA 2.55496120379  
TCACAGGA 1.54425330772  
TCACATAA 1.23743829385  
TCACATCA 0.274677536429  
TCACATGA 1.24647842313  
TCACCAA -0.111095226069  
TCACCACA 1.30576022889  
TCACCAGA 1.88521825568  
TCACCCAA -0.287963455848  
TCACCCCA -0.124606185897  
TCACCCGA 0.093886608755  
TCACCGAA 0.801803155174  
TCACCGCA 0.95616942585  
TCACCGGA 0.578243308209  
TCACCTAA -0.375295788718  
TCACCTCA 1.00844791579  
TCACCTGA 0.157401297614  
TCACGAAA 0.651003181671  
TCACGACA -0.346521010373  
TCACGAGA 0.180405382034  
TCACGCAA 0.827068677116  
TCACGCCA 0.584368737431  
TCACGCGA 0.151316254922  
TCACGGAA 1.05530003821  
TCACGGCA 1.18784654906  
TCACGGGA 0.367468712593  
TCACGTAA 1.00032980684  
TCACGTCA 1.10952873958  
TCACGTGA 1.02438602283  
TCACTAAA 0.681559547268

TCACTACA 0.0274099634325  
TCACTAGA 1.11376287175  
TCACTCAA -0.207254097601  
TCACTCCA -0.206143468016  
TCACTCGA -0.245897761812  
TCACTGAA 0.534687476109  
TCACTGCA -0.495652229096  
TCACTGGA 1.65133819296  
TCACTTAA -0.0928394734576  
TCACTTCA 2.00374647693  
TCAGAAAA 0.513417306181  
TCAGAACA -0.774891778031  
TCAGAAGA 0.7901191654  
TCAGACAA 0.0525499540453  
TCAGACCA -0.309448257286  
TCAGACGA -0.715848960608  
TCAGAGAA 1.12881809592  
TCAGAGCA -0.805994402678  
TCAGAGGA -0.0197390208007  
TCAGATAA 0.983256505217  
TCAGATCA 0.185822173373  
TCAGATGA 0.98162376523  
TCAGCAAA 0.256287092658  
TCAGCACA -0.292509646827  
TCAGCAGA 1.24343839992  
TCAGCCAA -1.11632158744  
TCAGCCCA -0.891182502235  
TCAGCCGA -0.576506271047  
TCAGCGAA 2.07574795797  
TCAGCGCA 0.153640354019  
TCAGCGGA 1.09013779238  
TCAGCTAA -0.464522333133  
TCAGCTCA -1.23925589589  
TCAGCTGA 1.12223634054  
TCAGGAAA 0.964986596503  
TCAGGACA -0.637332757502  
TCAGGAGA 0.336770369606  
TCAGGCAA 0.503788241361  
TCAGGCCA -0.935609351051  
TCAGGCCGA 0.0249189055859  
TCAGGGAA 0.27780457804  
TCAGGGCA -0.583266851322  
TCAGGGGA -0.424880039096  
TCAGGTAA 0.201814406683  
TCAGGTCA -0.505959537812  
TCAGTAAA 0.0906361175953  
TCAGTACA 0.221621293508  
TCAGTAGA 0.127143875614  
TCAGTCAA -0.0498038781591  
TCAGTCCA -0.655285194779  
TCAGTCGA -0.389124636339  
TCAGTGAA 0.150790397315  
TCAGTGCA 1.46171968573  
TCAGTGGA 0.870991318836

TCAGTTAA -0.0394747107535  
TCAGTTCA -0.782754660771  
TCATAAAA 1.56055072996  
TCATAACA 0.442129459296  
TCATAAGA 0.806646624325  
TCATACAA 0.219488301807  
TCATACCA 0.260193760847  
TCATACGA 0.723461405225  
TCATAGAA 0.517888969439  
TCATAGCA 0.947007928799  
TCATAGGA -0.0115913505683  
TCATATAA 1.33303237849  
TCATATCA 1.42386834696  
TCATATGA 0.664134008487  
TCATCAAA 1.98889297724  
TCATCACA 0.310162724153  
TCATCAGA 0.883592332664  
TCATCCAA 0.682748659956  
TCATCCCA -1.09862687452  
TCATCCGA 0.146027076691  
TCATCGAA 1.00554924544  
TCATCGCA -0.00609003896415  
TCATCGGA 0.514727162104  
TCATCTAA 0.349175071587  
TCATCTCA -1.11001337794  
TCATGAAA 2.07731158287  
TCATGACA 0.790823847901  
TCATGAGA 1.07720702462  
TCATGCAA -0.0665734480886  
TCATGCCA -0.510145580866  
TCATGCGA -0.233830932712  
TCATGGAA 1.54985766743  
TCATGGCA -0.0685769530791  
TCATGGGA -0.658362898206  
TCATGTAA 0.144907287275  
TCATGTCA 0.315492288914  
TCATTAAA 0.246600154356  
TCATTACA 0.376848380179  
TCATTAGA 0.159152907235  
TCATTCAA 0.676273699885  
TCATTCCA -0.0697704375045  
TCATTCGA 0.799670371651  
TCATTGAA -0.164949207053  
TCATTGCA -0.386802410844  
TCATTGGA 1.53546507381  
TCATTTAA 0.26482030853  
TCATTTCA 0.265583697225  
TCCAAAAA 0.903793508605  
TCCAAACA 0.398629418899  
TCCAAAGA 1.98720007381  
TCCAACAA 0.22571948545  
TCCAACCA -0.289726723437  
TCCAACGA -0.0797879624568  
TCCAAGAA -0.0887960323282

TCCAAGCA 1.19152588688  
TCCAAGGA 0.468565149728  
TCCAATAA 1.46298249343  
TCCAATCA -0.326511358184  
TCCACAAA 1.01328555596  
TCCACACA 0.0159851552574  
TCCACAGA 1.08646927981  
TCCACCAA 0.318501918138  
TCCACCCA -0.265017661266  
TCCACCGA 0.756988054404  
TCCACGAA 0.446309465188  
TCCACGCA 0.319664384042  
TCCACGGA -0.128420423058  
TCCACTAA 2.12400882086  
TCCACTCA -0.699183271497  
TCCAGAAA 0.686043076671  
TCCAGACA -0.192340226288  
TCCAGAGA 0.246786890014  
TCCAGCAA 1.44908244893  
TCCAGCCA -0.819899443444  
TCCAGCGA 0.893767864711  
TCCAGGAA 1.62979260355  
TCCAGGCA -0.539347956806  
TCCAGGGA 0.264656680629  
TCCAGTAA 1.22059461255  
TCCAGTCA 1.49996406455  
TCCATAAA 0.0453224305355  
TCCATACA 0.418087607589  
TCCATAGA 0.734516905643  
TCCATCAA -0.527583402148  
TCCATCCA -0.520738093431  
TCCATCGA 2.7056768652  
TCCATGAA 1.54420396953  
TCCATGCA -0.535086553319  
TCCATGGA 0.313056814591  
TCCATTAA 1.50715453238  
TCCATTCA -0.262467897226  
TCCCAAAA 1.67336217539  
TCCCAACA 0.570690402498  
TCCCAAGA 1.8133826925  
TCCCACAA 0.347580219994  
TCCCACCA -0.21028600187  
TCCCACGA 0.010541508957  
TCCCAGAA 0.28836440666  
TCCCAGCA 0.411047236093  
TCCCAGGA 0.274504540518  
TCCCATAA -0.206754886777  
TCCCATCA 0.347275031059  
TCCCAAAA 3.06394161244  
TCCCCACA -0.240070651652  
TCCCCAGA 0.780744077729  
TCCCCCAA -1.55215095618  
TCCCCCCA -1.0399566957  
TCCCCCGA 1.58621095738



TCCCCGAA 0.56868044399  
TCCCCGCA 0.683996270659  
TCCCCGGA -0.539620045441  
TCCCCTAA 0.141219830511  
TCCCCTCA -1.2473442354  
TCCCGAAA 0.0211410995736  
TCCCGACA 0.947007928799  
TCCCGAGA 1.27355946533  
TCCCGCAA -0.244688039504  
TCCCGCCA -0.00641958472474  
TCCCGCGA 0.735412487362  
TCCCGGAA 2.79610980108  
TCCCGGCA -0.958446893077  
TCCCGGGA 1.53434882342  
TCCCGTAA -0.0188038852627  
TCCCGTCA 0.12183637772  
TCCCTAAA 0.489004064937  
TCCCTACA -0.275242947854  
TCCCTAGA 0.896313048836  
TCCCTCAA -0.0694723266206  
TCCCTCCA -0.823680372126  
TCCCTCGA 1.8764722819  
TCCCTGAA 0.100232290293  
TCCCTGCA -0.46921487324  
TCCCTTAA 0.039658323742  
TCCCTTCA -0.0376629376932  
TCCGAAAA 0.399862040786  
TCCGAACA 0.377959634298  
TCCGAAGA 0.0326202422044  
TCCGACAA 0.845252816498  
TCCGACCA -0.631114480895  
TCCGACGA 0.789893292279  
TCCGAGAA 0.393843406873  
TCCGAGCA 0.726244120437  
TCCGAGGA -0.446345063625  
TCCGATAA -0.129596212354  
TCCGATCA 0.730835069684  
TCCGAAA 0.670246114318  
TCCGCACA -0.0393962276507  
TCCGCAGA 0.983215910509  
TCCGCCAA -0.788903405929  
TCCGCCCA -0.544468510863  
TCCGCCGA 0.563423949704  
TCCGCGAA 1.46363409054  
TCCGCGCA 0.0109387125648  
TCCGCGGA 0.340770301535  
TCCGCTAA -0.0905124598683  
TCCGCTCA -1.367233108  
TCCGGAAA 0.849315201825  
TCCGGACA -0.0970259328672  
TCCGGAGA -0.107957775558  
TCCGGCAA -0.427375885037  
TCCGGCCA -0.326179522465  
TCCGGCGA 1.0279040227

TCCGGGAA -0.252822178167  
TCCGGGCA 0.514050999987  
TCCGGTAA -0.243317811963  
TCCGGTCA -0.823740327387  
TCCGTAAA -0.113056054571  
TCCGTACA 2.09317391311  
TCCGTAGA 0.807398771409  
TCCGTCAA -0.571451917591  
TCCGTCCA -0.163122445177  
TCCGTCTGA 0.17352967933  
TCCGTGAA 1.07839946815  
TCCGTGCA 0.822227289745  
TCCGTTAA 0.271821750741  
TCCGTTCA 1.28577181085  
TCCTAAAA 1.59115830735  
TCCTAACA 1.41013651028  
TCCTAAGA -0.309124748687  
TCCTACAA -0.351155052465  
TCCTACCA 0.643652000435  
TCCTACGA -0.446469554064  
TCCTAGAA 0.169689628098  
TCCTAGCA 1.06305987285  
TCCTAGGA -0.23209077288  
TCCTATAA 0.536598133716  
TCCTATCA -0.474796541549  
TCCTCAAA 0.99479248044  
TCCTCACA 0.178776181072  
TCCTCAGA 1.06955689978  
TCCTCCAA -0.580778707967  
TCCTCCCA -0.932398621887  
TCCTCCGA 0.121387754148  
TCCTCGAA 0.253429641546  
TCCTCGCA 0.0858875776086  
TCCTCTAA 0.805038865697  
TCCTCTCA -0.632954357984  
TCCTGAAA 0.177885179268  
TCCTGACA 0.0338872134609  
TCCTGAGA 0.309123499619  
TCCTGCAA -0.415213085882  
TCCTGCCA -0.471305812987  
TCCTGCGA 0.477086707634  
TCCTGGAA -0.202953973008  
TCCTGGCA 0.0697104822429  
TCCTGTAA 0.452388470719  
TCCTGTCA -0.657819137292  
TCCTTAAA 0.430036607946  
TCCTTACA 1.09617120693  
TCCTTAGA 0.498677055313  
TCCTTCAA 0.323081001239  
TCCTTCCA -0.927793932893  
TCCTTCGA 0.596511551499  
TCCTTGAA 0.115478830036  
TCCTTGCA 0.985750685734  
TCCTTTAA 0.135358579159

TCCTTTCA -0.305022393186  
TCGAAAAA 0.447954071321  
TCGAAACA 0.788590722586  
TCGAAAGA 0.0588294349818  
TCGAACAA 0.537849699801  
TCGAACCA -0.375352413132  
TCGAACGA 0.173587969167  
TCGAAGAA 0.495244824767  
TCGAAGCA 0.329401701418  
TCGAATAA 0.196520856714  
TCGAATCA 1.26020547171  
TCGACAAA 0.486686211179  
TCGACACA -0.662447766756  
TCGACAGA 1.83829785088  
TCGACCAA -0.533438199982  
TCGACCCA -1.05092746768  
TCGACCGA -0.100214386985  
TCGACGAA 0.0543671397334  
TCGACGCA 0.188391506145  
TCGACTAA 1.01959709631  
TCGACTCA -0.443411003012  
TCGAGAAA 0.268336851163  
TCGAGACA -0.221134157008  
TCGAGAGA 0.187576072952  
TCGAGCAA -0.113465957036  
TCGAGCCA -1.32896041697  
TCGAGCGA -0.194884785879  
TCGAGGAA 0.238039042632  
TCGAGGCA -0.885465518231  
TCGAGTAA 0.530232258913  
TCGAGTCA -0.471832295127  
TCGATAAA 0.259136633006  
TCGATACA 0.454790636563  
TCGATAGA 1.68589615591  
TCGATCAA -0.460312765966  
TCGATCCA -0.738400674253  
TCGATCGA 0.477842185565  
TCGATGAA 0.885074976319  
TCGATGCA -0.482117745155  
TCGATTAA 0.300927532093  
TCGATTCA 1.24343839992  
TCGCAAAA 0.294335992347  
TCGCAACA 1.05271092853  
TCGCAAGA 1.39735396524  
TCGCACAA 1.23242162061  
TCGCACCA 0.118364593355  
TCGCACGA 2.08813184215  
TCGCAGAA -0.719819955797  
TCGCAGCA 0.0580845741281  
TCGCATAA 0.467330654239  
TCGCATCA 0.291083835763  
TCGCCAAA 0.0159851552574  
TCGCCACA -0.249567939803  
TCGCCAGA 1.9062567235

TCGCCCAA 0.173938124549  
TCGCCCA -0.244597898433  
TCGCCGA -0.707839312384  
TCGCCGAA -0.38424161337  
TCGCCGCA -0.601946662502  
TCGCCTAA -0.078579489216  
TCGCCTCA -0.758566459936  
TCGCGAAA 0.561743536956  
TCGCGACA 0.0783869245738  
TCGCGAGA 0.541222807797  
TCGCGCAA 0.691280210404  
TCGCGCCA -0.846549973563  
TCGCGCGA 1.82341333266  
TCGCGGAA 1.35350543489  
TCGCGGCA 0.482229328558  
TCGCGTAA 0.449132983287  
TCGCGTCA 0.331154143751  
TCGCTAAA 0.571863277302  
TCGCTACA 0.0783715194024  
TCGCTAGA 0.309013789818  
TCGCTCAA -0.211284631695  
TCGCTCCA -0.448065446547  
TCGCTGAA -0.126756456371  
TCGCTGCA -0.236625097714  
TCGCTTAA 0.427689817448  
TCGCTTCA 0.432152945408  
TCGGAAAA 0.539653145741  
TCGGAACA 0.417660218172  
TCGGAAGA 0.534342733355  
TCGGACAA -0.059241211049  
TCGGACCA -0.173031717574  
TCGGACGA 0.0619743798998  
TCGGAGAA -0.124668222938  
TCGGAGCA 0.646937257319  
TCGGATAA 0.0187391419074  
TCGGATCA 1.33952274373  
TCGGCAAA 0.884622813722  
TCGGCACA -0.202937735125  
TCGGCAGA 0.830919137247  
TCGGCCAA -0.663643124783  
TCGGCCCA -0.234726930787  
TCGGCCGA 1.88663136788  
TCGGCGAA 0.110927226429  
TCGGCGCA 0.991158733598  
TCGGCTAA -0.00989365904735  
TCGGCTCA -1.22032918561  
TCGGGAAA 0.991442688378  
TCGGGACA -0.155168796833  
TCGGGAGA -0.445210701749  
TCGGGCAA -0.327273705989  
TCGGGCCA -1.16745926199  
TCGGGGAA 0.280092662345  
TCGGGGCA 0.796318289631  
TCGGGTAA -0.0516806027527

TCGGGTCA -0.238230150029  
TCGGTAAA 0.585014505561  
TCGGTACA -0.229330957247  
TCGGTAGA -0.402393068807  
TCGGTCAA -0.0725460746655  
TCGGTCCA -0.662193997784  
TCGGTGAA 0.783839892641  
TCGGTGCA -0.520797632337  
TCGGTTAA 0.296807689641  
TCGGTTCA -0.288776807261  
TCGTAAAA 1.23766312608  
TCGTAAACA 0.772945938345  
TCGTAAAGA 1.88600475213  
TCGTACAA 1.00155659974  
TCGTACCA -0.19827912803  
TCGTACGA -0.888421645711  
TCGTAGAA 0.136346591907  
TCGTAGCA 0.636456328158  
TCGTATAA 1.00340563666  
TCGTATCA 2.64722069336  
TCGTCAAA 1.14629463831  
TCGTCACA -0.288219514778  
TCGTCAGA 0.326617528959  
TCGTCCAA 0.0229678614493  
TCGTCCCA -0.266071458259  
TCGTCGAA 0.443502809506  
TCGTCGCA 0.406702977766  
TCGTCTAA 0.223394969996  
TCGTCTCA -0.816268611094  
TCGTGAAA 0.929809512207  
TCGTGACA -0.642192464536  
TCGTGAGA 1.46109057184  
TCGTGCAA 0.901613468678  
TCGTGCCA -0.753268330052  
TCGTGGAA 0.612969270797  
TCGTGGCA 0.939498532288  
TCGTGTAA 1.02655877652  
TCGTGTCA 0.794225892639  
TCGTTAAA 0.469667868549  
TCGTTACA 0.381203880118  
TCGTTAGA 1.87216070751  
TCGTTCAA 0.743827458136  
TCGTTCCA -0.0904333522315  
TCGTTGAA 0.644386452389  
TCGTTGCA 0.575112311216  
TCGTTTAA 0.579361848557  
TCGTTTCA 0.31495581423  
TCTAAAAA 1.0179608173  
TCTAAACA 0.947007928799  
TCTAAAGA 0.988364984952  
TCTAACAA 0.753201296738  
TCTAACCA 1.24018332884  
TCTAAGAA 0.203237095077  
TCTAAGCA -0.20001012803

TCTAATAA 2.92961851061  
TCTAATCA 0.699586304088  
TCTACAAA -0.220891837826  
TCTACACA 0.172797309156  
TCTACAGA 1.04655323172  
TCTACCAA 1.30256344765  
TCTACCCA -0.369260292388  
TCTACGAA -0.0166779716132  
TCTACGCA 0.434412717506  
TCTACTAA 3.03915240174  
TCTACTCA 0.664745427248  
TCTAGAAA 0.428639317267  
TCTAGACA 0.822227289745  
TCTAGAGA 0.676786650456  
TCTAGCAA 0.240979348585  
TCTAGCCA 0.387059718841  
TCTAGGAA 0.165662841208  
TCTAGGCA -0.63515729749  
TCTAGTAA 1.58727224878  
TCTAGTCA -0.297187198119  
TCTATAAA 0.414908313302  
TCTATACA 1.79188290224  
TCTATAGA 0.423136132061  
TCTATCAA 0.342815233946  
TCTATCCA 0.395523611443  
TCTATGAA 0.0303294515857  
TCTATGCA 0.748416325603  
TCTATTAA 0.796515434189  
TCTATTCA 0.400537786547  
TCTCAAAA 2.5306316501  
TCTCAACA 0.877314933507  
TCTCAAGA 0.339909693718  
TCTCACAA 0.19229546802  
TCTCACCA 0.180279642527  
TCTCAGAA -0.550909121565  
TCTCAGCA -0.22532353091  
TCTCATAA 0.997829797336  
TCTCATCA 1.6577954579  
TCTCCAAA -0.361240235264  
TCTCCACA 0.966166757537  
TCTCCAGA 1.71450605728  
TCTCCCAA -0.0580404403939  
TCTCCCCA 0.930723829945  
TCTCCGAA -0.017815247981  
TCTCCGCA -0.491618155976  
TCTCCTAA -0.372076732435  
TCTCCTCA -0.145299494611  
TCTCGAAA 0.441474739513  
TCTCGACA -0.602559122153  
TCTCGAGA 1.89023180625  
TCTCGCAA 0.222106972763  
TCTCGCCA 0.254759482556  
TCTCGGAA 1.46935294815  
TCTCGGCA 0.495753611778

TCTCGTAA 2.36299590606  
TCTCGTCA 0.684637042517  
TCTCTAAA -0.810280787523  
TCTCTACA 0.76239068964  
TCTCTCAA -1.28775241626  
TCTCTCCA -0.435880580525  
TCTCTGAA 1.00924253119  
TCTCTGCA 0.866385588952  
TCTCTTAA 0.317102962035  
TCTCTTCA -0.291419626864  
TCTGAAAA 0.872043450406  
TCTGAACA 1.10863253333  
TCTGAAGA 0.532160819826  
TCTGACAA 1.34616362166  
TCTGACCA 1.32567745005  
TCTGAGAA 1.39663804113  
TCTGAGCA 0.804362287224  
TCTGATAA 3.1553565239  
TCTGATCA 0.83779192546  
TCTGCAAA 1.47018461922  
TCTGCACA 2.50457151276  
TCTGCAGA 2.29214335936  
TCTGCCAA 0.129326413677  
TCTGCCCA -0.12323762378  
TCTGCGAA 0.770933065345  
TCTGCGCA -0.540439642193  
TCTGCTAA 1.27065621506  
TCTGCTCA 0.169124216673  
TCTGGAAA 0.509398430055  
TCTGGACA 2.90309538542  
TCTGGCAA -0.534141008882  
TCTGGCCA -0.454534993989  
TCTGGGAA 0.640352171091  
TCTGGGCA 0.124398840617  
TCTGGTAA 1.46709275969  
TCTGGTCA -0.798533303461  
TCTGTAAA 0.360582392811  
TCTGTACA 0.636706349925  
TCTGTCAA -0.628660686909  
TCTGTCCA 0.305827417479  
TCTGTGAA 0.0848658400261  
TCTGTGCA -0.0498482200713  
TCTGTTAA 2.07472184865  
TCTGTTCA -0.378470919445  
TCTTAAAA 0.448163706559  
TCTTAACA 0.816495316926  
TCTTAAGA 0.941557620803  
TCTTACAA 1.76695233869  
TCTTACCA 1.08677238697  
TCTTAGAA 0.9881526434  
TCTTAGCA -0.256786928015  
TCTTATAA 1.44611570438  
TCTTATCA 1.18600417384  
TCTTCAA 1.64328961545

TCTTCACA 1.03986863641  
TCTTCCAA 0.661166639396  
TCTTCCCA 0.00141977390222  
TCTTCGAA 0.944088857002  
TCTTCGCA 0.616484564362  
TCTTCTAA 1.50739060622  
TCTTCTCA -0.0011941089594  
TCTTGAAA 0.0975311808527  
TCTTGACA 0.601693726242  
TCTTGCAA 1.13443619538  
TCTTGCCA 0.472078153335  
TCTTGGA 2.52209135617  
TCTTGGCA 0.680057334881  
TCTTGTA 2.5579473089  
TCTTGTCA 0.686858718042  
TCTTTAAA 1.37676391281  
TCTTTACA 1.89094273409  
TCTTTCAA 0.265694864273  
TCTTTCCA -0.245488483881  
TCTTTGAA 1.97536140779  
TCTTTGCA 0.640076959786  
TCTTTTAA 1.37676391281  
TCTTTTCA 1.31508139846  
TGAAAAAA 2.10582759597  
TGAAAACA 0.592611961362  
TGAAACAA 0.621968805371  
TGAAACCA 0.030296351285  
TGAAAGAA -0.198154221236  
TGAAAGCA -0.148851011146  
TGAAATA 1.09809872696  
TGAAATCA 3.09670757923  
TGAACAAA 0.442771272044  
TGAACACA 0.532470172322  
TGAACCAA 0.67280920175  
TGAACCCA -0.632116649746  
TGAACGAA 0.450878972102  
TGAACGCA -0.740179138834  
TGAACTAA -0.0747294454407  
TGAACTCA -0.749018584532  
TGAAGAAA 1.45723199277  
TGAAGACA 0.390544410242  
TGAAGCAA -0.364097478198  
TGAAGCCA -0.532000939129  
TGAAGGAA -0.396021573199  
TGAAGGCA -1.12362863495  
TGAAGTAA 0.0771486818802  
TGAAGTCA -0.88231162166  
TGAATAAA 1.19376962928  
TGAATACA -0.0752825743642  
TGAATCAA 0.442066589543  
TGAATCCA 2.0139842542  
TGAATGAA 0.957424322783  
TGAATGCA 0.781468953496  
TGAATTAA 0.531758619947



TGAATTCA 2.05718077108  
TGACAAAA 3.12527459594  
TGACAACA -0.235864623511  
TGACACAA 0.607315989259  
TGACACCA 0.0749563594514  
TGACAGAA 0.261935169746  
TGACAGCA 0.886173323403  
TGACATAA 0.763704292767  
TGACATCA -0.638307863214  
TGACCAA 0.463851791822  
TGACCACA -0.184735900614  
TGACCCAA 0.775119108398  
TGACCCCA -0.973388660241  
TGACCGAA 0.319005500699  
TGACCGCA -1.14162437325  
TGACCTAA 0.41539982154  
TGACCTCA -1.23667219884  
TGACGAAA 0.942712384122  
TGACGACA -0.205947572526  
TGACGCAA 0.955915032344  
TGACGCCA -1.11932684493  
TGACGGAA 1.48759038109  
TGACGGCA -0.360383999185  
TGACGTAA 0.96717704533  
TGACGTCA -0.630898808496  
TGACTAAA 0.466473585447  
TGACTACA 0.286440842018  
TGACTCAA -0.625275296411  
TGACTCCA -0.687922507579  
TGACTGAA 0.655738606445  
TGACTGCA -0.681527696035  
TGACTTAA 1.34856099941  
TGAGAAAA 0.995214873585  
TGAGAACA 0.103143243148  
TGAGACAA -0.418297034648  
TGAGACCA -0.664938408246  
TGAGAGAA -0.392456733272  
TGAGAGCA -1.07892241127  
TGAGATAA 0.0501159369684  
TGAGATCA 1.38647583247  
TGAGCAA 0.819038002915  
TGAGCACA 0.110225666598  
TGAGCCAA -0.482280540344  
TGAGCCCA -1.77912200772  
TGAGCGAA 0.37004366617  
TGAGCGCA 0.39594787819  
TGAGCTAA -0.10024186648  
TGAGCTCA -0.98546090197  
TGAGGAAA 0.693240622551  
TGAGGACA -0.186952996223  
TGAGGCAA -0.114645701714  
TGAGGCCA -1.31240735216  
TGAGGGAA 0.76348528952  
TGAGGGCA -0.983412846889

TGAGGTAA 0.838865291184  
TGAGTAAA 1.01759400767  
TGAGTACA 0.630523671755  
TGAGTCAA -0.806791308029  
TGAGTCCA -0.681604097358  
TGAGTGAA -0.869531366582  
TGAGTGCA -0.485920740704  
TGAGTTAA 0.108647677422  
TGATAAAA 1.98194586948  
TGATAACA 0.844448624917  
TGATACAA 1.36886064354  
TGATACCA 1.03071442559  
TGATAGAA 0.0238642758808  
TGATAGCA -0.326437246819  
TGATATAA 2.36558189307  
TGATATCA 4.45377035964  
TGATCAAA 0.491738899211  
TGATCACA 2.90339703533  
TGATCCAA 0.699590884004  
TGATCCCA 1.38625016753  
TGATCGAA -0.649933146795  
TGATCGCA 1.70138376577  
TGATCTAA 1.12950903867  
TGATGAAA 2.18808704754  
TGATGACA -0.495983648458  
TGATGCAA 0.547736280796  
TGATGCCA 0.0141003117221  
TGATGGAA -0.48321067961  
TGATGGCA -0.89916612821  
TGATGTAA 1.12165510759  
TGATTAAA 0.574051852527  
TGATTACA 6.28506926644  
TGATTCAA -0.0532061310746  
TGATTCCA 3.08768805957  
TGATTGAA -0.283383123679  
TGATTGCA 3.79857884496  
TGATTTAA 0.971323118209  
TGCAAAAA 1.07357327777  
TGCAAAACA 0.714622167704  
TGCAACAA 1.04663358842  
TGCAACCA -0.342424692034  
TGCAAGAA -0.0456095079858  
TGCAAGCA 0.244335177808  
TGCAATAA -0.576993615726  
TGCACAAA 0.369572975731  
TGCACACA 0.902465749375  
TGCACCAA 0.581123867077  
TGCACCCA -0.275988849598  
TGCACGAA -0.41254632581  
TGCACGCA -0.692770556646  
TGCACTAA -0.353816399908  
TGCAGAAA 2.13548817167  
TGCAGACA 0.994564941895  
TGCAGCAA -0.235413918159

TGCAGCCA -1.01649482788  
TGCAGGAA 0.326421633469  
TGCAGGCA -1.02377668584  
TGCAGTAA 0.446122521352  
TGCATAAA -0.0295113120789  
TGCATACA 1.19004365958  
TGCATCAA -0.686419878836  
TGCATCCA -0.327781243932  
TGCATGAA 0.0464436771978  
TGCATGCA 0.278906464149  
TGCATTAA 0.133424189262  
TGCCAAAA 0.815591408087  
TGCCAACA -0.728913170467  
TGCCACAA 0.371502785713  
TGCCACCA -0.60317512083  
TGCCAGAA -0.566766663714  
TGCCAGCA -1.17903458286  
TGCCATAA 0.369048367192  
TGCCCAA -0.145931939349  
TGCCACA 0.684901844922  
TGCCCAA -0.222948011848  
TGCCCCA -1.34060631018  
TGCCCGAA -0.498488446053  
TGCCCGCA -1.34621379256  
TGCCCTAA -0.21245438383  
TGCCGAAA 1.43909968971  
TGCCGACA -0.514240025603  
TGCCGCAA 0.865047629  
TGCCGCCA -1.00885074021  
TGCCGGAA -0.202256160381  
TGCCGGCA -0.747326930173  
TGCCGTAA 1.0752888726  
TGCCTAAA 0.142952079578  
TGCCTACA 0.414678276621  
TGCCTCAA -0.367641292148  
TGCCTCCA -0.553553814769  
TGCCTGAA -0.575307165816  
TGCCTTAA -0.47647445616  
TGCGAAAA 1.56083739106  
TGCGAACA -0.0296455868835  
TGCGACAA 1.08612870062  
TGCGACCA -0.542712945861  
TGCGAGAA -0.794482992458  
TGCGAGCA -0.422988117509  
TGCGATAA 0.935074333612  
TGCGCAA 0.877379468684  
TGCGCACA 1.03572297989  
TGCGCCAA -0.172675941386  
TGCGCCCA -0.82381568782  
TGCGCGAA 0.355944395338  
TGCGCGCA 0.738330726447  
TGCGCTAA 0.517050844845  
TGCGGAAA 0.76239068964  
TGCGGACA -0.222027240592

TGCGGCAA 0.268370159642  
TGCGGCCA -1.83566564835  
TGCGGGAA 0.156326266466  
TGCGGTAA 0.549230582419  
TGCGTAAA 1.87734600493  
TGCGTACA 0.239440496871  
TGCGTCAA 0.300821361317  
TGCGTCCA 0.0578443367259  
TGCGTGAA -0.467328364281  
TGCGTTAA -0.341710433345  
TGCTAAAA 0.382201469053  
TGCTAACA 1.00595685795  
TGCTACAA 0.559629073096  
TGCTACCA -1.20237820558  
TGCTAGAA 0.177131574939  
TGCTAGCA -0.0688228112871  
TGCTATAA 0.86560429695  
TGCTCAAA 0.539840505934  
TGCTCACA 1.29223990105  
TGCTCCAA -0.237402434334  
TGCTCCCA -1.24699907629  
TGCTCGAA -0.702583234454  
TGCTCTAA -1.02111929378  
TGCTGAAA 1.80041695083  
TGCTGACA -0.450948919907  
TGCTGCAA 0.214485576493  
TGCTGCCA -0.809196596543  
TGCTGGAA 1.00853160335  
TGCTGTAA 1.2208939725  
TGCTTAAA 1.23790377984  
TGCTTACA -0.134277302671  
TGCTTCAA -0.0660513376858  
TGCTTCCA -0.476979704146  
TGCTTGAA -0.248937993201  
TGCTTTAA -0.384384007116  
TGGA AAAA -0.104538660225  
TGGA AACA 0.508657940939  
TGGA ACAA 0.469977429223  
TGGA ACCA 0.763880827704  
TGGA AGAA -0.354393885657  
TGGA ATAA 1.0999021729  
TGGA CAAA -0.591838788301  
TGGA CACA 0.802291332564  
TGGA CCAA -0.103521918915  
TGGA CCCA -1.21460928712  
TGGA CGAA 0.171319661772  
TGGA CTAA 0.405606504285  
TGGA GAAA 0.450477604934  
TGGA GACA -0.565927290052  
TGGA GCAA -0.891325312337  
TGGA GCCA -0.195082763149  
TGGA GGAA -0.629707197672  
TGGA GTAA -0.073590711827  
TGGA TAAA 2.04339813898

TGGATACA 1.46300456029  
TGGATCAA 0.305056534377  
TGGATCCA 3.43610182425  
TGGATGAA 0.45505835346  
TGGATTAA 1.36873365497  
TGGCAAAA 0.175991175902  
TGGCAACA 0.120965985537  
TGGCACAA -0.371393700445  
TGGCACCA -0.780121209179  
TGGCAGAA 0.433948688763  
TGGCATAA 1.18797895026  
TGGCCAAA -0.541996189036  
TGGCCACA -0.83090019305  
TGGCCCAA -0.782846259088  
TGGCCCCA 0.0480200009497  
TGGCCGAA 0.246598072576  
TGGCCTAA 0.254479066801  
TGGCGAAA 0.21829606645  
TGGCGACA -0.611620901946  
TGGCGCAA -0.188490390691  
TGGCGCCA -0.13306778854  
TGGCGGAA -0.207479346188  
TGGCGTAA 1.75187442312  
TGGCTAAA 0.0777786284826  
TGGCTACA -0.152898824013  
TGGCTCAA -0.772260616397  
TGGCTGAA -0.194731358699  
TGGCTTAA 0.415499538798  
TGGGAAAA 1.11628411541  
TGGGAACA -0.973658875274  
TGGGACAA 0.910634237407  
TGGGACCA -0.199827139575  
TGGGAGAA -0.253914904444  
TGGGATAA 1.03161687718  
TGGGCAAA 0.0356829568158  
TGGGCACA -0.558386666843  
TGGGCCAA 0.557816259146  
TGGGCCCA -1.29348563815  
TGGGCGAA -0.458803059172  
TGGGCTAA 0.843323422872  
TGGGGAAA 1.01833595404  
TGGGGACA -1.39209080926  
TGGGGCAA -0.121311144647  
TGGGGGAA -0.829329698282  
TGGGGTAA 0.903349881305  
TGGGTAAA 0.233163097715  
TGGGTACA -0.447302890564  
TGGGTCAA -0.585136706042  
TGGGTGAA -0.482472896808  
TGGGTTAA -0.223908336923  
TGGTAAAA 1.19739421629  
TGGTAACA -0.138725233638  
TGGTACAA 2.46538721031  
TGGTACCA -0.540697782903

TGGTAGAA 1.52000619251  
TGGTATAA 1.74909025066  
TGGTCAAA 2.46280601139  
TGGTCACA -0.617331432432  
TGGTCCAA 1.41700180408  
TGGTCGAA -0.254331052249  
TGGTCTAA 0.0201666183953  
TGGTGAAA 1.21533104021  
TGGTGACA -1.30344612233  
TGGTGCAA 0.246600154356  
TGGTGGAA 0.558813015369  
TGGTGTA 1.61115526068  
TGGTTAAA 0.480586387849  
TGGTTACA -0.159933158347  
TGGTTCAA 0.996050291865  
TGGTTGAA -0.830254633098  
TGGTTTAA 2.11288753619  
TGTA AAAA 1.66138444647  
TGTA AACA 0.992918253982  
TGTA ACAA 2.18759512295  
TGTA AGAA 0.189564797305  
TGTA ATAA 1.24552434339  
TGTA CAAA 0.654499114683  
TGTA CACA 0.211607099404  
TGTA CCAA 0.611058196835  
TGTA CGAA 0.467229896091  
TGTA CTA 0.313056814591  
TGTA GAAA 1.41174635069  
TGTA GACA -0.856117834054  
TGTA GCAA 0.679653677755  
TGTA GGAA 0.18442946261  
TGTA GTAA 0.545023721567  
TGTA TAAA 2.90280081356  
TGTA TACA 0.294042461379  
TGTA TCAA 1.29309093268  
TGTA TGAA 0.271804471968  
TGTA TTAA 1.51860328103  
TGTA CAAA 1.151647519  
TGTA AACA 0.524334992769  
TGTA CACA 3.56833981531  
TGTA CAGAA 1.27773489131  
TGTA CATA 1.22353741664  
TGTA CCAA 1.06315459383  
TGTA CCACA 0.0313545200159  
TGTA CCAA 1.93824368825  
TGTA CCGAA -0.320337631667  
TGTA CCTAA 0.266083532583  
TGTA CGAAA 2.61146841327  
TGTA CGACA -0.960799512559  
TGTA CGCAA 1.91077293685  
TGTA CGGAA 1.1274004038  
TGTA CGTAA 1.3111716076  
TGTA CTA 0.691942424595  
TGTA CCAA 0.875594550585

TGTCTGAA -0.214630676553  
TGTCTTAA 1.64392414197  
TGTGAAAA 0.882333688527  
TGTGAACA 0.00865312639584  
TGTGACAA 1.14677303133  
TGTGAGAA 0.286603637208  
TGTGATAA 1.74991255373  
TGTGCAAA 0.358739809408  
TGTGCACA 0.388848175967  
TGTGCCAA 0.110629531902  
TGTGCGAA 1.3964879448  
TGTGCTAA -0.130000494013  
TGTGGAAA 1.581626878  
TGTGGCAA 0.845372935199  
TGTGGGAA 0.187162006927  
TGTGGTAA 1.14810953404  
TGTGTAAA 1.70280000064  
TGTGTCAA 0.811568992935  
TGTGTGAA 0.291298050917  
TGTGTTAA 2.22142529564  
TGTTAAAA 0.241238738362  
TGTTAACA 2.96669147187  
TGTTACAA 2.0285737842  
TGTTAGAA 0.351357817828  
TGTTATAA 1.584718113  
TGTTCAAA 0.137839644462  
TGTTCCAA 0.468664242452  
TGTTCGAA -0.00856256896952  
TGTTCTAA 0.844680118843  
TGTTGAAA 1.6939817891  
TGTTGCAA 0.969316282371  
TGTTGGAA 0.226095246724  
TGTTGTAA 2.48323535041  
TGTTTAAA 1.23614863119  
TGTTTCAA -0.0198843290387  
TGTTTGAA 0.951933836434  
TGTTTTAA 0.590715043503  
TTAAAAAA 1.447263806  
TTAAACAA 1.22032065032  
TTAAAGAA 0.0994214370157  
TTAAATAA 1.7029242829  
TTAACAAA 2.59998281713  
TTAACCAA 1.26192543828  
TTAACGAA 0.955268847858  
TTAACTAA 1.05027503785  
TTAAGAAA 2.00455920381  
TTAAGCAA 1.57479405997  
TTAAGGAA 1.83880330704  
TTAAGTAA 1.9139601419  
TTAATAAA 3.25887427925  
TTAATCAA 1.30780870032  
TTAATGAA 2.47000376545  
TTAATTAA 2.14276836421  
TTACAAAA 3.12127341495

TTACACAA 0.845073991603  
TTACAGAA 1.53291281163  
TTACATAA 1.19526705357  
TTACCAA 1.70212009132  
TTACCCAA 0.181446271992  
TTACCGAA 0.6725760424  
TTACCTAA 1.13132976339  
TTACGAAA 0.788022604847  
TTACGCAA 1.50776615932  
TTACGGAA 1.54163005685  
TTACGTAA 2.30704952809  
TTACTAAA 1.06321538181  
TTACTCAA 1.18723117492  
TTACTGAA 0.832363476152  
TTAGAAAA 0.403230777045  
TTAGACAA 0.581539390349  
TTAGAGAA 0.426238192313  
TTAGATAA 1.44746074238  
TTAGCAA 1.53583979419  
TTAGCCAA 1.21537017768  
TTAGCGAA 0.601139764607  
TTAGCTAA 0.0517426397942  
TTAGGAAA 1.20773025357  
TTAGGCAA 2.03267655606  
TTAGGGAA 0.646246314565  
TTAGTAAA 1.35542608504  
TTAGTCAA 0.92790718172  
TTAGTGAA 0.468729402164  
TTATAAAA 2.52942421775  
TTATACAA 1.77378682215  
TTATAGAA 1.05937075066  
TTATATAA 2.06438206417  
TTATCAA 1.23587779162  
TTATCCAA 2.60656103348  
TTATCGAA 1.60372830265  
TTATGAAA 1.79610974818  
TTATGCAA 1.41754723042  
TTATGGAA 0.0974214710511  
TTATTAAA 3.4426175872  
TTATTCAA 1.23688578946  
TTATTGAA 0.768877932212  
TTCAAAAA 1.42117743824  
TTCACAA 2.3204867929  
TTCAGAA -0.555912263235  
TTCACAAA 1.61250633584  
TTCACCAA 1.04183008945  
TTCACGAA 0.31888621471  
TTCAGAAA 0.655977178423  
TTCAGCAA 1.80131877789  
TTCAGGAA 0.529599814174  
TTCATAAA 1.64861189398  
TTCATCAA 2.17642845548  
TTCATGAA 0.755457113454  
TTCAAAAA 1.52250058121



TTCCACAA 1.19638538574  
TTCCAGAA -0.524785489942  
TTCCCAA 2.05701297962  
TTCCCAA 0.559997339963  
TTCCCGAA 1.25997252054  
TTCCGAAA 0.85414472305  
TTCCGCAA 0.398838013246  
TTCCGGAA 1.59360856231  
TTCCTAAA 1.61281548016  
TTCCTCAA 0.388328980056  
TTCGAAAA 0.873970762251  
TTCGACAA 0.769769350372  
TTCGAGAA -0.250806182497  
TTCGCAA 0.118085634846  
TTCGCCAA 0.215305589602  
TTCGCGAA 0.737696408107  
TTCGAAA 0.396545765381  
TTCGGCAA 1.05418253875  
TTCGTAAA 1.2362052556  
TTCGTCAA 1.07901983857  
TTCTAAAA 1.14011778912  
TTCTACAA 0.911236288159  
TTCTAGAA 0.832947623597  
TTCTCAA 1.19608914846  
TTCTCAA -0.627637075724  
TTCTGAAA -0.145808281622  
TTCTGCAA 0.294139680501  
TTCTTAAA 0.286497882788  
TTCTTCAA 1.70913652235  
TTGAAAA 3.67987367241  
TTGAACAA 0.0728173305885  
TTGACAAA 3.39533349545  
TTGACCAA 0.937858922427  
TTGAGAAA 0.609014305314  
TTGAGCAA 1.47856857148  
TTGATAAA 2.1442412235  
TTGATCAA 0.419017746855  
TTGAAAA 1.82421752424  
TTGCACAA 0.355957302373  
TTGCCAAA 0.847730342775  
TTGCCCAA 0.359392239233  
TTGCGAAA 1.16523925189  
TTGCGCAA 2.32768308972  
TTGCTAAA 1.09949456039  
TTGAAAA 0.955154766319  
TTGACAA 0.574072462148  
TTGGCAA 0.701979518279  
TTGGCAA 0.790296116693  
TTGGGAAA 1.06651583568  
TTGGTAAA 1.31795321385  
TTGTAAAA 1.20202513571  
TTGTACAA 0.965613836791  
TTGTCAA 2.25402638547  
TTGTGAAA 0.651943938015

TTGTTAAA 2.51556289436  
TTTAAAAA 2.12882626776  
TTTACAAA 1.84775412796  
TTTAGAAA 0.498282766197  
TTTATAAA 1.17336152441  
TTTCAAAA 2.325298619  
TTTCCAAA 1.42190731028  
TTTCGAAA 0.751773195716  
TTTGAAAA 3.51676892236  
TTTGCAAA 2.87121250966  
TTTTAAAA 1.92713780876
