# Supplementary material for: The intracellular immune receptor Rx1 regulates the DNA-binding activity of a Golden2-like transcription factor
Source: PubMed Central journal article supplement (PMC5836133; doi:10.1074/jbc.ra117.000485), 2017-12-07
Supplement: supp_RA117.000485_133217_1_supp_23416_1z1jtx.pdf [file supp_RA117.000485_133217_1_supp_23416_1z1jtx.pdf]

#8mers all  
AAAAAAA 0.150851800382  
AAAAAAC -0.00289993649774  
AAAAAAG 0.0282372136884  
AAAAAAT 0.25173400005  
AAAAACA -0.0589735741251  
AAAAACC 0.0281534978505  
AAAAACG 0.159940293278  
AAAAACT 0.151590984924  
AAAAAGA 0.202885338277  
AAAAAGC 0.169347386554  
AAAAAGG -0.00791858634485  
AAAAAGT -0.0383675686706  
AAAAATA 0.15169243368  
AAAAATC 0.427073129785  
AAAAATG -0.109036445194  
AAAAATT 0.164074509317  
AAAAACA 0.12225586468  
AAAAACAC -0.0918647002545  
AAAAACAG -0.0908856514917  
AAAAACAT -0.0538100083555  
AAAAACCA -0.188923630929  
AAAAACCC -0.111125303825  
AAAAACCG 0.0375663306643  
AAAAACCT 0.0648541103087  
AAAAACGA 0.0726896491318  
AAAAACGC -0.0342914654137  
AAAAACGG 0.133829916133  
AAAAACGT -0.0125306130446  
AAAAACTA 0.1694232973  
AAAAACTC 0.0576627404057  
AAAAACTG 0.0208075735568  
AAAAACTT 0.308529740225  
AAAAAGAA 0.167215742317  
AAAAAGAC 0.0658102740836  
AAAAAGAG -0.057731197737  
AAAAAGAT 0.27914609028  
AAAAAGCA -0.0563644591724  
AAAAAGCC -0.277542017328  
AAAAAGCG 0.250227367284  
AAAAAGCT -0.013323240596  
AAAAAGGA 0.082429581834  
AAAAAGGC -0.0563413874206  
AAAAAGGG -0.111859719362  
AAAAAGGT -0.0885800554246  
AAAAAGTA -0.0230825440157  
AAAAAGTC 0.111801201434  
AAAAAGTG -0.00903321203416  
AAAAAGTT 0.0035393520242  
AAAAATAA 0.254484208375  
AAAAATAC -0.0771902805048  
AAAAATAG -0.0186455771042  
AAAAATAT 0.267123347664  
AAAAATCA 0.320406852405

AAAAATCC 0.433608539669  
AAAAATCG 0.397994413146  
AAAAATCT 0.452252140464  
AAAAATGA 0.165817536842  
AAAAATGC 0.0308686671095  
AAAAATGG 0.043262270535  
AAAAATGT -0.0701422596585  
AAAAATTA 0.22501624052  
AAAAATTC 0.165298907723  
AAAAATTG 0.048961461151  
AAAAATTT 0.281835434261  
AAAACAAA 0.174525765435  
AAAACAAC 0.0864294942447  
AAAACAAG -0.0480230359919  
AAAACAAT 0.166884515369  
AAAACACA 0.0255038210842  
AAAACACC -0.0399779945234  
AAAACACG 0.0178908491055  
AAAACACT -0.0640460427874  
AAAACAGA 0.113993854149  
AAAACAGC 0.00481376320227  
AAAACAGG -0.0454845885468  
AAAACAGT 0.032256774681  
AAAACATA 0.0932067890309  
AAAACATC -0.0816795577064  
AAAACATG 0.0208834843033  
AAAACATT -0.0399083030815  
AAAACCAA -0.0321781274863  
AAAACCAC -0.0842445367934  
AAAACCAG -0.31016208612  
AAAACCAT -0.107507864791  
AAAACCCA -0.205609433948  
AAAACCCC -0.279085226767  
AAAACCCG 0.124756988393  
AAAACCCCT -0.187782356298  
AAAACCGA 0.0451181208757  
AAAACCGC -0.174829099072  
AAAACCGG 0.115547104808  
AAAACCGT 0.0479661029321  
AAAACCTA 0.131786646881  
AAAACCTC -0.0689372969541  
AAAACCTG -0.0587877637716  
AAAACCTT 0.21916268886  
AAAACGAA 0.0701670766334  
AAAACGAC -0.0652685063404  
AAAACGAG -0.0659359446306  
AAAACGAT 0.135534988285  
AAAACGCA -0.0833057197368  
AAAACGCC -0.123473790128  
AAAACGCG 0.156027928755  
AAAACGCT -0.0647388929747  
AAAACGGA 0.0240092314564  
AAAACGGC -0.00736115267549  
AAAACGGG 0.0462183947032

AAAACGGT -0.144819789904  
AAAACGTA 0.100846025088  
AAAACGTC -0.0266501925948  
AAAACGTG -0.150465202828  
AAAACGTT 0.00187101702253  
AAAACATA 0.0702429873798  
AAAACATC 0.0900776809868  
AAAACATG 0.136644453041  
AAAACATA 0.14872010102  
AAAACACA -0.0411839394719  
AAAACACC -0.130926481982  
AAAACACG 0.0931799568163  
AAAACACT -0.26559535205  
AAAACAGA 0.03904205717  
AAAACAGC -0.095945808067  
AAAACAGG -0.0675404241156  
AAAACAGT -0.0338285944347  
AAAACATA 0.259203538725  
AAAACATC 0.0441559673876  
AAAACATT -0.0999019145635  
AAAACATT 0.115656979293  
AAAAGAAA 0.15577104151  
AAAAGAAC 0.0281341948009  
AAAAGAAG -0.0483086392177  
AAAAGAAAT 0.286395790414  
AAAAGACA 0.0142256247363  
AAAAGACC -0.332349931787  
AAAAGACG 0.194452027785  
AAAAGACT 0.081712038117  
AAAAGAGA 0.00153857607266  
AAAAGAGC -0.105631130036  
AAAAGAGG -0.0624157298724  
AAAAGAGT -0.129707641264  
AAAAGATA 0.233772339833  
AAAAGATC 0.293427035851  
AAAAGATG 0.0812704831281  
AAAAGATT 0.39476296783  
AAAAGCAA 0.122206228267  
AAAAGCAC 0.0392665392665  
AAAAGCAG -0.0988423611162  
AAAAGCAT -0.0413008350813  
AAAAGCCA -0.179377327853  
AAAAGCCC -0.38003775821  
AAAAGCCG -0.147049580284  
AAAAGCCT -0.11758664141  
AAAAGCGA 0.183934623329  
AAAAGCGC 0.182894535156  
AAAAGCGG -0.106438024454  
AAAAGCGT 0.236224231871  
AAAAGCTA 0.081664635081  
AAAAGCTC -0.146844272285  
AAAAGCTG -0.208105330914  
AAAAGCTT 0.202876579345  
AAAAGGAA 0.201142608575

AAAAGGAC -0.133673715174  
AAAAGGAG 0.000246803277106  
AAAAGGAT 0.287607570637  
AAAAGGCA -0.272120911384  
AAAAGGCC -0.20281341344  
AAAAGGCG -0.121494605601  
AAAAGGCT -0.168997424053  
AAAAGGGA -0.199576837723  
AAAAGGGC -0.107612542598  
AAAAGGGG -0.0735823303139  
AAAAGGGT -0.217738801095  
AAAAGGTA 0.0243140661153  
AAAAGGTC -0.118310449164  
AAAAGGTG -0.0875818615489  
AAAAGGTT 0.0679812043448  
AAAAGTAA -0.0132846344968  
AAAAGTAC -0.164375573807  
AAAAGTAG -0.203406418601  
AAAAGTAT 0.140169094715  
AAAAGTCA -0.111891467097  
AAAAGTCC -0.214366193072  
AAAAGTCG 0.12368999219  
AAAAGTCT -0.036864050872  
AAAAGTGA 0.122788077334  
AAAAGTGC -0.163273875684  
AAAAGTGG 0.0209204013144  
AAAAGTGT -0.0137293019536  
AAAAGTTA 0.0525167040319  
AAAAGTTC -0.156602848847  
AAAAGTTG -0.0791775478834  
AAAAGTTT 0.170204978038  
AAAATAAA 0.323624300198  
AAAATAAC 0.194923468829  
AAAATAAG 0.123383714293  
AAAATAAT 0.240029050459  
AAAATACA 0.14445742064  
AAAATACC 0.091214790917  
AAAATACG 0.33372042948  
AAAATACT 0.191986306869  
AAAATAGA 0.243506591991  
AAAATAGC 0.09166880379  
AAAATAGG -0.088827952453  
AAAATAGT -0.0591293317744  
AAAATATA 0.300162040247  
AAAATATC 0.400743779333  
AAAATATG 0.245145420255  
AAAATATT 0.316208404196  
AAAATCAA 0.361074575009  
AAAATCAC 0.338400618965  
AAAATCAG 0.36789778326  
AAAATCAT 0.24412239148  
AAAATCCA 0.442976431173  
AAAATCCC 0.396326078144  
AAAATCCG 0.451905153169

AAAATCCT 0.453320730203  
AAAATCGA 0.368287019802  
AAAATCGC 0.411159472731  
AAAATCGG 0.37364364284  
AAAATCGT 0.385620022919  
AAAATCTA 0.455476539752  
AAAATCTC 0.453691525003  
AAAATCTG 0.476058918418  
AAAATCTT 0.461271225519  
AAAATGAA 0.124034502822  
AAAATGAC 0.0139230527799  
AAAATGAG -0.112030950994  
AAAATGAT 0.177020211236  
AAAATGCA 0.13563133654  
AAAATGCC -0.0679666709973  
AAAATGCG 0.0958599446727  
AAAATGCT -0.132324435511  
AAAATGGA -0.0859771617347  
AAAATGGC -0.0583635258208  
AAAATGGG -1.39581627336E-5  
AAAATGGT -0.0948541272819  
AAAATGTA -0.163825264081  
AAAATGTC -0.0675758924987  
AAAATGTG -0.0686375080314  
AAAATGTT 0.140579973913  
AAAATTAA 0.207183054386  
AAAATTAC 0.172932709503  
AAAATTAG 0.0146055146055  
AAAATTAT 0.0312475009445  
AAAATTCA 0.112682085515  
AAAATTCC 0.190210872029  
AAAATTCT 0.185148500398  
AAAATTGA 0.161954847704  
AAAATTGC 0.0690254957921  
AAAATTGG 0.121871053919  
AAAATTGT 0.0424267242449  
AAAATTTA 0.229829002556  
AAAATTTT 0.271633892846  
AAAATTTG 0.110431888353  
AAAATTTT 0.282408441038  
AAACAAAA 0.23710201752  
AAACAAAC -0.130971288185  
AAACAAAG -0.0726414750042  
AAACAAAT 0.181590681591  
AAACAACA -0.0303212338416  
AAACAACC -0.116415760041  
AAACAACG -0.112597055101  
AAACAACT 0.191212601184  
AAACAAGA -0.0376524601651  
AAACAAGC 0.0175609293227  
AAACAAGG -0.167250537526  
AAACAAGT -0.0400331257289  
AAACAATA 0.105429684592

AAACAATC 0.0715384806294  
AAACAATG -0.125364025055  
AAACAATT 0.0617001087567  
AAACACAA -0.0504598033944  
AAACACAC 0.158604703414  
AAACACAG -0.00754300181191  
AAACACAT -0.0418832462636  
AAACACCA -0.0794241628991  
AAACACCC -0.263266997737  
AAACACCG 0.102431632735  
AAACACCT -0.0774920926436  
AAACACGA 0.187101742298  
AAACACGC -0.141506390371  
AAACACGG -0.0664284723692  
AAACACGT -0.0129968949576  
AAACACTA 0.215649432848  
AAACACTC -0.132841774822  
AAACACTG -0.0194338810099  
AAACACTT 0.137606397499  
AAACAGAA 0.11941271359  
AAACAGAC -0.0421399531397  
AAACAGAG 0.040201503834  
AAACAGAT 0.160153266214  
AAACAGCA -0.160922149064  
AAACAGCC -0.233191070528  
AAACAGCG 0.0597856809978  
AAACAGCT -0.0589249870441  
AAACAGGA 0.200815310614  
AAACAGGC -0.124006603272  
AAACAGGG -0.057452769574  
AAACAGGT -0.151491423059  
AAACAGTA 0.038842215134  
AAACAGTC -0.0438184119735  
AAACAGTG -0.173992678776  
AAACAGTT 0.0213243505617  
AAACATAA 0.100788474375  
AAACATAC -0.0645742129395  
AAACATAG -0.0515092677601  
AAACATAT 0.0686016595108  
AAACATCA 0.0186587155026  
AAACATCC 0.0435136456866  
AAACATCG 0.167317045934  
AAACATCT 0.0571715767789  
AAACATGA 0.180479989489  
AAACATGC -0.0382355130692  
AAACATGG 0.058175255145  
AAACATGT -0.0179421908959  
AAACATTA 0.0748273416161  
AAACATTC 0.039349266622  
AAACATTG -0.0811022059006  
AAACATTT 0.255354262315  
AAACCAAA 0.00356999481763  
AAACCAAC 0.140997642387  
AAACCAAG 0.0795220487878

AAACCAAT 0.028833675175  
AAACCACA -0.0428183003941  
AAACCACC -0.301196432756  
AAACCACG -0.0301113785962  
AAACCACT 0.0824368809442  
AAACCAGA -0.158330369378  
AAACCAGC 0.146286577666  
AAACCAGG -0.245444383315  
AAACCAGT -0.134030391889  
AAACCATA 0.0890542542864  
AAACCATC -0.148608769894  
AAACCATG 0.0515329925305  
AAACCATT -0.119072575053  
AAACCCAA -0.091076534509  
AAACCCAC -0.319979250599  
AAACCCAG -0.132610913507  
AAACCCAT -0.308397774253  
AAACCCCA -0.348930172314  
AAACCCCC -0.389934352486  
AAACCCCG -0.240608843115  
AAACCCCT -0.236916537716  
AAACCCGA -0.161432183319  
AAACCCGC -0.0171186845828  
AAACCCGG -0.156246811866  
AAACCCGT -0.0689766901888  
AAACCCTA 0.0244018122806  
AAACCCTC -0.252498559451  
AAACCCTG -0.149442094425  
AAACCCTT -0.180448346067  
AAACCGAA 0.0986537501689  
AAACCGAC -0.0667234643264  
AAACCGAG -0.134435328855  
AAACCGAT 0.123973197667  
AAACCGCA -0.00335540097662  
AAACCGCC -0.316648741414  
AAACCGCG 0.0528419085713  
AAACCGCT -0.265936329123  
AAACCGGA 0.00352585015246  
AAACCGGC -0.0649009891434  
AAACCGGG -0.166726020979  
AAACCGGT -0.0994278917373  
AAACCGTA -0.0246746421611  
AAACCGTC -0.102461016669  
AAACCGTG -0.0749164011402  
AAACCGTT 0.0307852354165  
AAACCTAA -0.0943899038707  
AAACCTAC -0.0429341186917  
AAACCTAG 0.123157592855  
AAACCTAT 0.0230907352394  
AAACCTCA -0.0684576250155  
AAACCTCC -0.152025118977  
AAACCTCG -0.0325490780036  
AAACCTCT -0.260003499805  
AAACCTGA 0.0935534258374

AAACCTGC -0.0971314496763  
AAACCTGG -0.305963900261  
AAACCTGT -0.121396215699  
AAACCTTA 0.0174640792119  
AAACCTTC -0.155803030916  
AAACCTTG 0.0706367524549  
AAACCTTT 0.0274668608002  
AAACGAAA 0.127479690226  
AAACGAAC -0.0413612748869  
AAACGAAG -0.130703140294  
AAACGAAT 0.0984511288074  
AAACGACA -0.0891199462785  
AAACGACC -0.236246462459  
AAACGACG 0.0394611796822  
AAACGACT 0.0288980440496  
AAACGAGA 0.074502748115  
AAACGAGC -0.0110860682958  
AAACGAGG -0.222298033054  
AAACGAGT -0.19840880594  
AAACGATA 0.164264286184  
AAACGATC 0.157009626707  
AAACGATG -0.250984949367  
AAACGATT 0.176403676404  
AAACGCAA 0.249897447501  
AAACGCAC -0.114835220896  
AAACGCAG 0.0467947286129  
AAACGCAT -0.0382069384818  
AAACGCCA -0.203718188757  
AAACGCCC -0.177750488587  
AAACGCCG 0.00271732387026  
AAACGCCT -0.1828830433  
AAACGCGA 0.191393619118  
AAACGCGC 0.138465642604  
AAACGCGG -0.0954246257277  
AAACGCGT 0.214823762983  
AAACGCTA -0.00245615059524  
AAACGCTC 0.0247823581157  
AAACGCTG 0.0773085260907  
AAACGCTT -0.0496005593483  
AAACGGAA -0.0283154383481  
AAACGGAC -0.0698914502979  
AAACGGAG -0.0906148040554  
AAACGGAT 0.242949561131  
AAACGGCA -0.189274578402  
AAACGGCC -0.17648445104  
AAACGGCG -0.153879217866  
AAACGGCT -0.14263038284  
AAACGGGA -0.0696687390245  
AAACGGGC -0.0552384340263  
AAACGGGG -0.0514722302906  
AAACGGGT -0.207189964084  
AAACGGTA 0.0142304839275  
AAACGGTC -0.210086373499  
AAACGGTG -0.0969535130496



AAACGGTT -0.0907005664726  
AAACGTAA 0.0257971938359  
AAACGTAC -0.163538402484  
AAACGTAG -0.0280906257527  
AAACGTAT 0.147923038182  
AAACGTCA 0.0966161324934  
AAACGTCC -0.303397544531  
AAACGTCCG 0.193738093326  
AAACGTCT -0.129473382358  
AAACGTGA 0.0649727245788  
AAACGTGC -0.165051046431  
AAACGTGG -0.0412541254125  
AAACGTGT 0.065375292648  
AAACGTTA 0.0226164478745  
AAACGTTC -0.192108433901  
AAACGTTG 0.0345386597374  
AAACGTTT 0.128245943346  
AAACTAAA 0.201589016299  
AAACTAAC 0.0208396896418  
AAACTAAG 0.040173586123  
AAACTAAT 0.107036788855  
AAACTACA -0.122666236442  
AAACTACC 0.0480273662092  
AAACTACG 0.164021955724  
AAACTACT 0.140971365591  
AAACTAGA 0.178868345949  
AAACTAGC -0.0391700240185  
AAACTAGG 0.0203404305015  
AAACTAGT -0.124728763603  
AAACTATA 0.225074937196  
AAACTATC 0.219945841158  
AAACTATG 0.0517059759484  
AAACTATT 0.136311613614  
AAACTCAA 0.0552163733982  
AAACTCAC -0.0922506666745  
AAACTCAG -0.0255806770958  
AAACTCAT -0.208102191379  
AAACTCCA -0.240125659493  
AAACTCCC -0.283590913977  
AAACTCCG -0.228573476347  
AAACTCCT -0.102707969898  
AAACTCGA 0.214009182281  
AAACTCGC 0.0312120008934  
AAACTCGG -0.082836329145  
AAACTCGT 0.114372658014  
AAACTCTA -0.0395423356577  
AAACTCTC -0.122684897966  
AAACTCTG -0.0659426717614  
AAACTCTT 0.0768026980148  
AAACTGAA 0.0665941423517  
AAACTGAC -0.160996550783  
AAACTGAG 0.0340744363262  
AAACTGAT 0.0762980611465  
AAACTGCA -0.201098480924

AAACTGCC -0.22045066755  
AAACTGCG -0.0770127584977  
AAACTGCT -0.261902792597  
AAACTGGA -0.0519619764426  
AAACTGGC -0.128460926611  
AAACTGGG -0.181922671061  
AAACTGGT -0.085767464946  
AAACTGTA -0.081289278259  
AAACTGTC -0.0787045890148  
AAACTGTG -0.0540433421166  
AAACTGTT -0.0147626965809  
AAACTTAA 0.0493967285388  
AAACTTAC -0.0509154721829  
AAACTTAG -0.0539966278111  
AAACTTAT 0.120221455005  
AAACTTCA -0.1175811268  
AAACTTCC -0.238981077062  
AAACTTCG 0.0801586710678  
AAACTTCT -0.00337583848529  
AAACTTGA -0.0590245899605  
AAACTTGC -0.0428679368073  
AAACTTGG -0.142457176414  
AAACTTGT -0.0136541500178  
AAACTTTA 0.0294263629264  
AAACTTTC 0.00636993350511  
AAACTTTG 0.0102761163367  
AAAGAAAA 0.093858321131  
AAAGAAAC -0.0512178845512  
AAAGAAAG -0.0254919721071  
AAAGAAAT 0.274534865444  
AAAGAACA 0.262463595688  
AAAGAACC -0.186166509775  
AAAGAACG -0.191954113589  
AAAGAACT 0.0434470282955  
AAAGAAGA -0.0244834878803  
AAAGAAGC -0.151433910206  
AAAGAAGG -0.010780753205  
AAAGAAGT 0.0873842178638  
AAAGAATA 0.0976406432241  
AAAGAATC 0.427494988101  
AAAGAATG -0.0493598916931  
AAAGAATT 0.206812259586  
AAAGACAA 0.095194265819  
AAAGACAC -0.154966961847  
AAAGACAG 0.0442805916073  
AAAGACAT -0.0919549206952  
AAAGACCA -0.0828721969941  
AAAGACCC -0.229159603877  
AAAGACCG -0.18991417788  
AAAGACCT -0.130785846158  
AAAGACGA -0.0643480946511  
AAAGACGC -0.201694118815  
AAAGACGG -0.05585950786  
AAAGACGT 0.158829628527

AAAGACTA 0.0643949402568  
AAAGACTC -0.0831864922774  
AAAGACTG 0.0806982328854  
AAAGACTT 0.0387546258111  
AAAGAGAA 0.0183017233834  
AAAGAGAC -0.279834643199  
AAAGAGAG -0.0853857214806  
AAAGAGAT 0.27649540521  
AAAGAGCA 0.00515218619398  
AAAGAGCC -0.150482748894  
AAAGAGCG -0.0358522562766  
AAAGAGCT -0.297560900864  
AAAGAGGA -0.138404921598  
AAAGAGGC -0.0911429256714  
AAAGAGGG -0.212998326083  
AAAGAGGT -0.152532884509  
AAAGAGTA -0.100261159773  
AAAGAGTC -0.0625395064342  
AAAGAGTG -0.157868805793  
AAAGAGTT 0.0434607963905  
AAAGATAA 0.0734061021855  
AAAGATAC 0.257553273619  
AAAGATAG 0.146244242827  
AAAGATAT 0.364307834005  
AAAGATCA 0.109968094817  
AAAGATCC 0.274933395619  
AAAGATCG 0.242839257991  
AAAGATCT 0.364238894542  
AAAGATGA 0.00700838579626  
AAAGATGC -0.0681935378905  
AAAGATGG -0.0221403910863  
AAAGATGT -0.02188638205  
AAAGATTA 0.29389306662  
AAAGATTC 0.407042028254  
AAAGATTG 0.323244732336  
AAAGATTT 0.421284921285  
AAAGCAAA 0.0319489354248  
AAAGCAAC -0.0675145799727  
AAAGCAAG 0.115141274279  
AAAGCAAT 0.211813609921  
AAAGCACA 0.00540071752193  
AAAGCACC -0.238379070117  
AAAGCACG -0.0375651166151  
AAAGCACT -0.144451614149  
AAAGCAGA -0.0301418769697  
AAAGCAGC 0.0107377210718  
AAAGCAGG -0.0831727283004  
AAAGCAGT 0.00413498898347  
AAAGCATA -0.0120812951849  
AAAGCATC -0.105030952282  
AAAGCATG -0.0745708731439  
AAAGCATT -0.227859989988  
AAAGCCAA -0.200743594796  
AAAGCCAC -0.346019945867

AAAGCCAG -0.0760623530158  
AAAGCCAT -0.084088557137  
AAAGCCCA -0.321620020119  
AAAGCCCC -0.466840013129  
AAAGCCCG -0.234747549932  
AAAGCCCT -0.209789209919  
AAAGCCGA -0.0258099468169  
AAAGCCGC -0.234058156814  
AAAGCCGG -0.238920145654  
AAAGCCGT -0.242270741154  
AAAGCCTA 0.0100511058333  
AAAGCCTC -0.113999101208  
AAAGCCTG -0.120510576603  
AAAGCCTT -0.109671726572  
AAAGCGAA 0.0284574534084  
AAAGCGAC -0.277660864629  
AAAGCGAG -0.000365667273436  
AAAGCGAT 0.266759932501  
AAAGCGCA -0.00686774929199  
AAAGCGCC -0.222958892555  
AAAGCGCG 0.120501740838  
AAAGCGCT -0.191152019783  
AAAGCGGA 0.0256983460398  
AAAGCGGC -0.189377321453  
AAAGCGGG -0.22048655319  
AAAGCGGT -0.0780467476204  
AAAGCGTA 0.113339853872  
AAAGCGTC 0.0436625475355  
AAAGCGTG -0.146138532507  
AAAGCGTT -0.0678689112242  
AAAGCTAA -0.126799964384  
AAAGCTAC -0.185366375568  
AAAGCTAG 0.0962570162697  
AAAGCTAT -0.0997492274659  
AAAGCTCA -0.108273703658  
AAAGCTCC -0.283552611631  
AAAGCTCG -0.127989521078  
AAAGCTCT -0.247431881363  
AAAGCTGA 0.00383713427799  
AAAGCTGC -0.274013612193  
AAAGCTGG -0.071821394116  
AAAGCTGT 0.203108066744  
AAAGCTTA 0.123743703005  
AAAGCTTC -0.0335477827134  
AAAGCTTG 0.0934805328745  
AAAGCTTT -0.183425523999  
AAAGGAAA 0.027538569715  
AAAGGAAC -0.0604573136472  
AAAGGAAG -0.187022681409  
AAAGGAAT 0.309120415181  
AAAGGACA 0.0985285991778  
AAAGGACC -0.185510285105  
AAAGGACG -0.210314408193  
AAAGGACT -0.0587877673216

AAAGGAGA -0.121006681613  
AAAGGAGC -0.0959733838522  
AAAGGAGG -0.330934343619  
AAAGGAGT -0.0255446961015  
AAAGGATA 0.248277202823  
AAAGGATC 0.218931052264  
AAAGGATG 0.0101106616258  
AAAGGATT 0.415258598956  
AAAGGCAA -0.0368652461357  
AAAGGCAC -0.386894206206  
AAAGGCAG -0.032979260252  
AAAGGCAT -0.241536736788  
AAAGGCCA -0.157280354223  
AAAGGCCC -0.327638638994  
AAAGGCCG -0.236151426689  
AAAGGCCCT -0.265394610701  
AAAGGCCGA -0.144311847465  
AAAGGCCGC -0.0418786239526  
AAAGGCCGG -0.203975028201  
AAAGGCCGT -0.0887754282753  
AAAGGCTA -0.118913896402  
AAAGGCTC -0.252379284427  
AAAGGCTG -0.159766142133  
AAAGGCTT -0.143294689784  
AAAGGGAA -0.073791895879  
AAAGGGAC -0.111113215161  
AAAGGGAG -0.127865083246  
AAAGGGAT 0.181709159653  
AAAGGGCA -0.192815937708  
AAAGGGCC -0.387644521615  
AAAGGGCG -0.156937656603  
AAAGGGCT -0.257087176614  
AAAGGGGA -0.142834727499  
AAAGGGGC -0.268508479968  
AAAGGGGG -0.306886314205  
AAAGGGGT -0.182115535707  
AAAGGGTA -0.207344804284  
AAAGGGTC -0.1994064112  
AAAGGGTG -0.213574080871  
AAAGGGTT -0.19150154914  
AAAGGTAA 0.0760764362824  
AAAGGTAC -0.276741339817  
AAAGGTAG 0.0255586164677  
AAAGGTAT 0.0682929250316  
AAAGGTCA -0.189704605009  
AAAGGTCC -0.246250840889  
AAAGGTCCG 0.0823200238231  
AAAGGTCT -0.0431824517515  
AAAGGTGA 0.0536776445867  
AAAGGTGC -0.210200466105  
AAAGGTGG -0.200804892109  
AAAGGTGT 0.0175602402164  
AAAGGTTA -0.0722196025226  
AAAGGTTC 0.159574174726

AAAGGTTG -0.0523460527803  
AAAGTAAA 0.0721115596009  
AAAGTAAC -0.149167847672  
AAAGTAAG 0.0449121552083  
AAAGTAAT 0.228646001373  
AAAGTACA 0.0120865966439  
AAAGTACC -0.119898722573  
AAAGTACG -0.0268526966563  
AAAGTACT 0.00379410838779  
AAAGTAGA 0.0107043884684  
AAAGTAGC -0.190956283927  
AAAGTAGG 0.053941073472  
AAAGTAGT 0.0159813385612  
AAAGTATA 0.132916067531  
AAAGTATC 0.251214206988  
AAAGTATG -0.0896144077962  
AAAGTATT 0.145292438852  
AAAGTCAA -0.0634648032477  
AAAGTCAC -0.272541333501  
AAAGTCAG 0.0437220536387  
AAAGTCAT -0.0138267917902  
AAAGTCCA -0.390730240738  
AAAGTCCC -0.34101527292  
AAAGTCCG -0.160754506833  
AAAGTCCT -0.253538095551  
AAAGTCGA 0.0579574064423  
AAAGTCGC 0.0596698627002  
AAAGTCGG -0.134980086355  
AAAGTCGT 0.0556973204966  
AAAGTCTA -0.0319007612972  
AAAGTCTC -0.0956088542571  
AAAGTCTG -0.0247147974421  
AAAGTCTT 0.032262289838  
AAAGTGAA -0.145891255646  
AAAGTGAC 0.0592330094961  
AAAGTGAG 0.0221505287394  
AAAGTGAT 0.336779534152  
AAAGTGCA -0.050347493391  
AAAGTGCC -0.145821100829  
AAAGTGCG -0.179698824464  
AAAGTGCT -0.249705371542  
AAAGTGGA -0.0342749996553  
AAAGTGGC -0.210408132084  
AAAGTGGG -0.0960340505795  
AAAGTGGT -0.0609334927301  
AAAGTGTA -0.0253419828363  
AAAGTGTC -0.100320008359  
AAAGTGTG -0.044405014986  
AAAGTGTT 0.0768092669504  
AAAGTTAA -0.104850988664  
AAAGTTAC -0.23367184752  
AAAGTTAG -0.104880362456  
AAAGTTAT -0.18759606977  
AAAGTTCA -0.162811763246

AAAGTTCC -0.028274437303  
AAAGTTCG 0.0738750246345  
AAAGTTCT 0.0621438946592  
AAAGTTGA 0.0308073545835  
AAAGTTGC -0.252139508347  
AAAGTTGG -0.0488508361942  
AAAGTTGT -0.00897863550433  
AAAGTTTA -0.0453398830683  
AAAGTTTC 0.0535771893689  
AAAGTTTG 0.0963515018634  
AAATAAAA 0.261888425801  
AAATAAAC 0.0436800654  
AAATAAAG 0.258282665343  
AAATAAAT 0.312065509035  
AAATAACA 0.162902571993  
AAATAACC 0.13964134605  
AAATAACG 0.108990743728  
AAATAACT 0.131948753161  
AAATAAGA 0.174361615009  
AAATAAGC 0.196147938572  
AAATAAGG 0.0658255658635  
AAATAAGT 0.0352239291633  
AAATAATA 0.219463264918  
AAATAATC 0.211568317629  
AAATAATG 0.143696037635  
AAATAATT 0.167604243362  
AAATACAA 0.0364977409254  
AAATACAC -0.0518304367847  
AAATACAG 0.157014809895  
AAATACAT 0.121357196558  
AAATACCA -0.00934933121572  
AAATACCC -0.0491221248797  
AAATACCG 0.105707636011  
AAATACCT 0.0693379329743  
AAATACGA 0.171053974084  
AAATACGC 0.202739356072  
AAATACGG 0.252387903915  
AAATACGT 0.304535667102  
AAATACTA 0.191682663883  
AAATACTC 0.158737399911  
AAATACTG 0.263453234732  
AAATACTT 0.223762329823  
AAATAGAA 0.215436888243  
AAATAGAC -0.113630574413  
AAATAGAG 0.0653670199125  
AAATAGAT 0.297873631207  
AAATAGCA 0.0986073297665  
AAATAGCC -0.0528900826989  
AAATAGCG 0.0340948738349  
AAATAGCT -0.0332949304241  
AAATAGGA 0.00551487925343  
AAATAGGC -0.00462813608954  
AAATAGGG -0.0431363303939  
AAATAGGT -0.0837600686086

AAATAGTA 0.0558892225559  
AAATAGTC -0.058341058225  
AAATAGTG -0.102010511101  
AAATAGTT 0.174920099163  
AAATATAA 0.260451911967  
AAATATAC 0.209265739569  
AAATATAG 0.231908216757  
AAATATAT 0.308786748181  
AAATATCA 0.345924541798  
AAATATCC 0.412151821243  
AAATATCG 0.383690138172  
AAATATCT 0.425426450516  
AAATATGA 0.186734271334  
AAATATGC 0.291023554229  
AAATATGG 0.312520893703  
AAATATGT 0.287625088502  
AAATATTA 0.300183103213  
AAATATTC 0.286474748728  
AAATATTG 0.203624552434  
AAATATTT 0.340770967182  
AAATCAAA 0.327752676949  
AAATCAAC 0.356775938655  
AAATCAAG 0.335689642334  
AAATCAAT 0.33042053273  
AAATCACA 0.351454347715  
AAATCACC 0.326964373043  
AAATCACG 0.393152105273  
AAATCACT 0.232454217303  
AAATCAGA 0.294422521695  
AAATCAGC 0.359664386911  
AAATCAGG 0.356520432278  
AAATCAGT 0.218059657454  
AAATCATA 0.3333642329  
AAATCATC 0.279812120902  
AAATCATG 0.340902753954  
AAATCATT 0.220277658153  
AAATCCAA 0.396351411899  
AAATCCAC 0.407530119651  
AAATCCAG 0.401263475982  
AAATCCAT 0.430070566434  
AAATCCCA 0.396665260302  
AAATCCCC 0.356969494297  
AAATCCCG 0.430889104618  
AAATCCCT 0.358030198725  
AAATCCGA 0.419310698876  
AAATCCGC 0.445969066371  
AAATCCGG 0.421996376542  
AAATCCGT 0.435053510811  
AAATCCTA 0.423438172887  
AAATCCTC 0.44967143452  
AAATCCTG 0.419950253284  
AAATCCTT 0.405196236579  
AAATCGAA 0.364702167732  
AAATCGAC 0.344423902524



AAATCGAG 0.238289253441  
AAATCGAT 0.381582155135  
AAATCGCA 0.37702027096  
AAATCGCC 0.305741480114  
AAATCGCG 0.423477196204  
AAATCGCT 0.259026726555  
AAATCGGA 0.295983311135  
AAATCGGC 0.292788545053  
AAATCGGG 0.367708006394  
AAATCGGT 0.309242133384  
AAATCGTA 0.389036006511  
AAATCGTC 0.333458803156  
AAATCGTG 0.344718728787  
AAATCGTT 0.30849762414  
AAATCTAA 0.449518574584  
AAATCTAC 0.426877290514  
AAATCTAG 0.440833395379  
AAATCTAT 0.402204075554  
AAATCTCA 0.432101853751  
AAATCTCC 0.43271508423  
AAATCTCG 0.460973117377  
AAATCTCT 0.375953088074  
AAATCTGA 0.468886241614  
AAATCTGC 0.457996564057  
AAATCTGG 0.47066341613  
AAATCTGT 0.442059662927  
AAATCTTA 0.46724159325  
AAATCTTC 0.460260536018  
AAATCTTG 0.419100919101  
AAATGAAA 0.155076166215  
AAATGAAC -0.245358322472  
AAATGAAG 0.0452333160588  
AAATGAAT 0.246242053094  
AAATGACA 0.00623163851402  
AAATGACC -0.0190336749634  
AAATGACG 0.118554338226  
AAATGACT -0.0358189236732  
AAATGAGA 0.0920906841456  
AAATGAGC -0.274588051069  
AAATGAGG -0.138738586957  
AAATGAGT -0.0201345955928  
AAATGATA 0.0864732889061  
AAATGATC -0.0342189587089  
AAATGATG 0.0932891980468  
AAATGATT 0.212785851405  
AAATGCAA 0.0669496288402  
AAATGCAC -0.0774899151577  
AAATGCAG 0.0742712409379  
AAATGCAT 0.0416071180923  
AAATGCCA -0.261024962439  
AAATGCCC -0.0108910023868  
AAATGCCG 0.187370349554  
AAATGCCT -0.231330097061  
AAATGCGA 0.0332406878924

AAATGCGC 0.130192694245  
AAATGCGG -0.123609353417  
AAATGCGT 0.0979474902009  
AAATGCTA 0.0714692378999  
AAATGCTC -0.0734122610454  
AAATGCTG -0.0895451600006  
AAATGCTT 0.174652614047  
AAATGGAA 0.0089688950098  
AAATGGAC -0.160659354439  
AAATGGAG -0.116823137987  
AAATGGAT 0.282279220163  
AAATGGCA -0.232086636297  
AAATGGCC -0.340315286062  
AAATGGCG -0.0278225884286  
AAATGGCT -0.293979755472  
AAATGGGA -0.121425245615  
AAATGGGC -0.103328278988  
AAATGGGG -0.0542754538222  
AAATGGGT -0.120501093109  
AAATGGTA 0.00784393208636  
AAATGGTC -0.159626937063  
AAATGGTG -0.083297143708  
AAATGGTT -0.118475010547  
AAATGTAA 0.155375429735  
AAATGTAC -0.265513744511  
AAATGTAG -0.0202624590316  
AAATGTAT -0.00719865871381  
AAATGTCA 0.00904072116193  
AAATGTCC -0.122274965223  
AAATGTCC 0.210482252213  
AAATGTCT -0.0784048511321  
AAATGTGA -0.0146767790639  
AAATGTGC -0.03398577641  
AAATGTGG 0.0879798252593  
AAATGTGT -0.00527674327165  
AAATGTTA 0.164156259352  
AAATGTTC 0.0377181521573  
AAATGTTG 0.101245873973  
AAATTAAC 0.0653091107637  
AAATTAAC 0.0277154514865  
AAATTAAG 0.101510915819  
AAATTAAT 0.201781671479  
AAATTACA 0.241602738626  
AAATTACC 0.288135242681  
AAATTACG 0.323008255294  
AAATTACT 0.157049845624  
AAATTAGA 0.188911921637  
AAATTAGC 0.0368189017759  
AAATTAGG 0.162528787283  
AAATTAGT 0.118326605987  
AAATTATA 0.250927235776  
AAATTATC 0.178182314546  
AAATTATG 0.0618022963001  
AAATTATT 0.151202166354

AAATTCAA 0.100526145981  
AAATTCAC -0.0680542559729  
AAATTCAG 0.206822525004  
AAATTCAT 0.115535426232  
AAATTCCA 0.0378553754297  
AAATTCCC 0.251830251892  
AAATTCCG 0.204387583175  
AAATTCCT 0.113578554235  
AAATTCGA 0.260095764326  
AAATTCGC 0.301472960446  
AAATTCGG 0.278569124252  
AAATTCGT 0.15052242325  
AAATTCTA 0.184020108263  
AAATTCTC 0.286392998693  
AAATTCTG 0.188871046619  
AAATTCTT 0.26968679518  
AAATTGAA 0.181950651118  
AAATTGAC -0.0882936869996  
AAATTGAG 0.0859010386634  
AAATTGAT 0.261105961183  
AAATTGCA 0.172968831427  
AAATTGCC 0.0908264782523  
AAATTGCG 0.223039641468  
AAATTGCT 0.0774948502221  
AAATTGGA 0.0641058954913  
AAATTGGC 0.0702824036157  
AAATTGGG 0.0647161011073  
AAATTGGT 0.0159084107647  
AAATTGTA 0.118636088261  
AAATTGTC 0.177866908024  
AAATTGTG 0.036710263983  
AAATTGTT 0.113839113012  
AAATTTAA 0.151020780567  
AAATTTAC -0.0475179375634  
AAATTTAG 0.167940667941  
AAATTTAT 0.258587852322  
AAATTTCA 0.195495719072  
AAATTTCC 0.331927768005  
AAATTTCG 0.38289015569  
AAATTTCT 0.196776666474  
AAATTTGA 0.161671642227  
AAATTTGC 0.198877508233  
AAATTTGG 0.104604561134  
AAATTTGT 0.126866564966  
AAATTTTA 0.225615422585  
AAATTTTC 0.277599030678  
AAATTTTG 0.109357459326  
AACAAAAA 0.12535126968  
AACAAAAC 0.213924512602  
AACAAAAG -0.0501619227238  
AACAAAAT 0.39530237983  
AACAAACA 0.169609400203  
AACAAACC 0.0889084676963  
AACAAACG 0.0396042422429

AACAACT -0.158567489333  
AACAAAGA 0.0919884966023  
AACAAAGC -0.129039674534  
AACAAAGG -0.0447099992555  
AACAAAGT -0.165673938401  
AACAAATA 0.199932987516  
AACAAATC 0.332450384298  
AACAAATG -0.0956838381081  
AACAAATT 0.172472865558  
ACAACAA -0.00178983547162  
ACAACAC -0.207081969414  
ACAACAG -0.201250257217  
ACAACAT 0.104078742801  
ACAACCA -0.208712987401  
ACAACCC -0.152211228155  
ACAACCG -0.179648791947  
ACAACCT -0.25088908768  
ACAACGA 0.0453501018226  
ACAACGC -0.148126549261  
ACAACGG -0.010101010101  
ACAACGT -0.0216177747933  
ACAACCTA 0.29073563922  
ACAACCTC 0.146466135778  
ACAACCTG -0.0436731497338  
ACAACCTT 0.106198484986  
ACAAGAA 0.084388663022  
ACAAGAC -0.0605757272424  
ACAAGAG -0.0626618353891  
ACAAGAT 0.205419589352  
ACAAGCA 0.0233299004889  
ACAAGCC -0.00927798595429  
ACAAGCG 0.0461759001051  
ACAAGCT -0.0308614399523  
ACAAGGA -0.0910737772043  
ACAAGGC -0.177716299035  
ACAAGGG -0.103006990115  
ACAAGGT -0.126779075691  
ACAAGTA 0.00520207586695  
ACAAGTC -0.119519512067  
ACAAGTG -0.153745199081  
ACAAGTT -0.120749270004  
ACAATAA 0.242437756837  
ACAATAC 0.0399657542745  
ACAATAG 0.0532860684376  
ACAATAT 0.145951736861  
ACAATCA 0.13057547906  
ACAATCC 0.212879280016  
ACAATCG 0.122881835003  
ACAATCT 0.218524053302  
ACAATGA 0.0677550829066  
ACAATGC -0.116982504908  
ACAATGG 0.224861499383  
ACAATGT 0.00798449668985  
ACAATTA 0.0849346364678

AACAATTC 0.195858392828  
AACAATTG 0.0498200769326  
AACACAAA 0.0653058692145  
AACACAAC -0.0632559434698  
AACACAAG 0.00679912118713  
AACACAAT 0.247325838235  
AACACACA 0.0147726692116  
AACACACC -0.139510967578  
AACACACG 0.104986103184  
AACACACT -0.232183433326  
AACACAGA -0.109314001434  
AACACAGC -0.0143554326485  
AACACAGG -0.025772428341  
AACACAGT -0.18633484612  
AACACATA 0.0473091830106  
AACACATC 0.0184966752553  
AACACATG -0.13156074072  
AACACATT 0.017237635556  
AACACCAA -0.172791106764  
AACACCAC -0.0956213415828  
AACACCAG -0.318079364603  
AACACCAT 0.0548937367119  
AACACCCA -0.0895592562259  
AACACCCC -0.270867721856  
AACACCCG -0.271107666957  
AACACCCCT -0.210666713684  
AACACCGA 0.00988012806195  
AACACCGC -0.00280524970315  
AACACCGG 0.0229608110771  
AACACCGT -0.153178020612  
AACACCTA -0.0276323299501  
AACACCTC 0.0210995379663  
AACACCTG -0.136766639955  
AACACCTT 0.098621927987  
AACACGAA 0.159359083602  
AACACGAC -0.221826548985  
AACACGAG -0.0886273415209  
AACACGAT 0.221208812118  
AACACGCA 0.126039262403  
AACACGCC -0.173071422694  
AACACGCG -0.0717416664598  
AACACGCT -0.201889072628  
AACACGGA -0.0199369513343  
AACACGGC -0.0415545644986  
AACACGGG -0.163754413261  
AACACGGT -0.175818874732  
AACACGTA 0.130665021934  
AACACGTC -0.112964111897  
AACACGTG -0.0700397367064  
AACACGTT -0.106406915664  
AACACTAA 0.216275504154  
AACACTAC -0.0991916307951  
AACACTAG 0.0672518120041  
AACACTAT 0.00912607753115

AACACTCA -0.274188463565  
AACACTCC -0.162077532941  
AACACTCG -0.0405675360449  
AACACTCT -0.278082495683  
AACACTGA 0.0855938583211  
AACACTGC 0.0217564578878  
AACACTGG -0.0569454683474  
AACACTGT 0.0157250914827  
AACACTTA 0.196380371233  
AACACTTC -0.026694738816  
AACACTTG -0.0783805246048  
AACAGAAA 0.18465800019  
AACAGAAC -0.16776931892  
AACAGAAG 0.0730769180527  
AACAGAAT 0.37583175462  
AACAGACA 0.258295485568  
AACAGACC 0.108208180226  
AACAGACG -0.0324496543871  
AACAGACT -0.25317818099  
AACAGAGA -0.0248004301609  
AACAGAGC -0.101559376801  
AACAGAGG -0.215973596067  
AACAGAGT -0.133002830174  
AACAGATA 0.268082131718  
AACAGATC 0.323550823551  
AACAGATG -0.102588264491  
AACAGATT 0.429201898295  
AACAGCAA -0.0152314849285  
AACAGCAC -0.277046227766  
AACAGCAG -0.225479007441  
AACAGCAT 0.0443924585593  
AACAGCCA -0.218943059174  
AACAGCCC -0.204778946539  
AACAGCCG -0.197116402078  
AACAGCCT -0.294107188634  
AACAGCGA -0.124447904518  
AACAGCGC 0.0632650379919  
AACAGCGG -0.0535000868508  
AACAGCGT -0.0185999360661  
AACAGCTA 0.0483775786806  
AACAGCTC -0.0762156870855  
AACAGCTG -0.239095497611  
AACAGCTT -0.0943519276853  
AACAGGAA 0.258474728172  
AACAGGAC -0.0301941059517  
AACAGGAG -0.00886184974052  
AACAGGAT 0.213521601717  
AACAGGCA -0.0162724031078  
AACAGGCC -0.14628381189  
AACAGGCG -0.252949931058  
AACAGGCT -0.234296626334  
AACAGGGA -0.259846956431  
AACAGGGC -0.147265854405  
AACAGGGG -0.132265278019

AACAGGGT -0.0883887367141  
AACAGGTA -0.13397784612  
AACAGGTC -0.162502377821  
AACAGGTG -0.31352679985  
AACAGGTT -0.131878272414  
AACAGTAA 0.0809390657876  
AACAGTAC -0.16136698174  
AACAGTAG -0.118931429879  
AACAGTAT 0.204605008649  
AACAGTCA 0.0148677320892  
AACAGTCC 0.00347364656248  
AACAGTCG 0.0389064473041  
AACAGTCT -0.179521962221  
AACAGTGA -0.0653843714934  
AACAGTGC 0.0755654985657  
AACAGTGG 0.0371809376437  
AACAGTGT -0.129186850782  
AACAGTTA 0.102578045736  
AACAGTTC -0.149448315022  
AACAGTTG 0.0258729584379  
AACATAAA 0.140675021715  
AACATAAC -0.0572345131129  
AACATAAG 0.0554520703926  
AACATAAT 0.291336824081  
AACATACA 0.0972032638699  
AACATACC -0.0565746735473  
AACATACG -0.00562408138166  
AACATACT -0.0169246381368  
AACATAGA 0.0471561158399  
AACATAGC 0.038645682348  
AACATAGG -0.00247950774801  
AACATAGT -0.141169026235  
AACATATA 0.096693503062  
AACATATC 0.30178244272  
AACATATG -0.18378266048  
AACATATT 0.148571199171  
AACATCAA -0.109869856864  
AACATCAC 0.00686335335723  
AACATCAG 0.0189944745735  
AACATCAT 0.0462046068107  
AACATCCA -0.0178660321307  
AACATCCC -0.0399721173989  
AACATCCG 0.127468011649  
AACATCCT -0.165583045884  
AACATCGA 0.135127697934  
AACATCGC 0.135309700874  
AACATCGG 0.106956819078  
AACATCGT 0.0533849623731  
AACATCTA 0.140920271819  
AACATCTC 0.11163478172  
AACATCTG 0.102674393991  
AACATCTT 0.138299456481  
AACATGAA 0.0717991576827  
AACATGAC -0.178628639806

AACATGAG 0.222823587805  
AACATGAT 0.178126756348  
AACATGCA -0.0493193579703  
AACATGCC 0.0330481814267  
AACATGCG -0.105864817986  
AACATGCT -0.282758250027  
AACATGGA 0.0121016333138  
AACATGGC 0.0730429260673  
AACATGGG -0.11357026083  
AACATGGT -0.124644786332  
AACATGTA -0.062054364437  
AACATGTC -0.170195551411  
AACATGTG -0.198727452051  
AACATGTT 0.11762298132  
AACATTAA 0.100744509244  
AACATTAC -0.0452918483222  
AACATTAG 0.00462032280214  
AACATTAT 0.10188836739  
AACATTCA -0.0998251306776  
AACATTCC 0.135861757074  
AACATTCT -0.0648458375731  
AACATTCT 0.0245024638964  
AACATTGA -0.105746171822  
AACATTGC 0.0375312949351  
AACATTGG 0.0107793384123  
AACATTGT -0.161925716381  
AACATTTA 0.181918833434  
AACATTTT 0.264307006731  
AACATTTG 0.00317259408168  
AACCAAAA 0.0560214009912  
AACCAAAC -0.111272922405  
AACCAAAG -0.0662502929782  
AACCAAAT 0.114408443611  
AACCAACA 0.0299376511498  
AACCAACC -0.0718797754072  
AACCAACG -0.0979147191268  
AACCAACT -0.0164908797618  
AACCAAGA 0.00840007367454  
AACCAAGC 0.051184793609  
AACCAAGG -0.0955278411521  
AACCAAGT -0.131384032383  
AACCAATA -0.0606736212797  
AACCAATC 0.166348912068  
AACCAATG -0.145368601275  
AACCAATT 0.0668707984497  
AACCACAA -0.113425983373  
AACCACAC -0.153489339649  
AACCACAG -0.266393499108  
AACCACAT -0.0639165336135  
AACCACCA -0.0308321715583  
AACCACCC -0.138819625357  
AACCACCG -0.145675642139  
AACCACCT -0.388338934497  
AACCACGA -0.000409439440185



AACCACGC -0.164988037946  
AACCACGG -0.304526697925  
AACCACGT -0.074555271525  
AACCACTA -0.179310531071  
AACCACTC 0.108973987762  
AACCACTG -0.109736338517  
AACCACTT 0.0956148986452  
AACCAGAA 0.0673497188649  
AACCAGAC -0.255511102841  
AACCAGAG -0.100752242936  
AACCAGAT 0.303073045497  
AACCAGCA 0.0804456787398  
AACCAGCC -0.140274952242  
AACCAGCG -0.0669274947545  
AACCAGCT -0.132764205213  
AACCAGGA -0.214667277724  
AACCAGGC -0.172746695337  
AACCAGGG -0.235537093599  
AACCAGGT -0.231470628364  
AACCAGTA -0.0516141982292  
AACCAGTC -0.368565150593  
AACCAGTG -0.169622347559  
AACCAGTT -0.128274481583  
AACCATAA 0.146884703257  
AACCATAC -0.233644116406  
AACCATAG 0.0851944847923  
AACCATAT 0.0334494186373  
AACCATCA -0.0161776748817  
AACCATCC -0.0585191565148  
AACCATCG -0.0541274134361  
AACCATCT -0.135166847288  
AACCATGA 0.00360795019087  
AACCATGC -0.00407495992967  
AACCATGG -0.269035884878  
AACCATGT -0.0173171390408  
AACCATTA 0.0162733662767  
AACCATTC -0.0401867112399  
AACCATTG -0.149782753203  
AACCCAAA -0.102738646266  
AACCCAAC -0.189207071189  
AACCCAAG -0.0765450391597  
AACCCAAT -0.01606427364  
AACCCACA 0.0756829591041  
AACCCACC -0.0559347037818  
AACCCACG -0.273302848134  
AACCCACT -0.388373477538  
AACCCAGA 0.155051745961  
AACCCAGC -0.335901484561  
AACCCAGG -0.169064559207  
AACCCAGT -0.158812436966  
AACCCATA -0.0361546827442  
AACCCATC -0.111225527903  
AACCCATG -0.275466351309  
AACCCATT -0.161474623842

AACCCCAA -0.29400738223  
AACCCAC -0.260678485473  
AACCCAG -0.33396249574  
AACCCAT -0.167370682672  
AACCCCA -0.310827758621  
AACCCCC -0.351386661959  
AACCCCG -0.332211500032  
AACCCCT -0.422833458722  
AACCCCGA -0.117073190905  
AACCCCGC -0.203412377416  
AACCCCGG -0.211490478593  
AACCCCGT -0.160044926633  
AACCCCTA -0.19060615835  
AACCCCTC -0.051366398608  
AACCCCTG -0.0215968965318  
AACCCCTT -0.111036667577  
AACCCGAA 0.0925760471215  
AACCCGAC -0.292336641436  
AACCCGAG -0.317612476489  
AACCCGAT 0.0224260072745  
AACCCGCA 0.0836061984044  
AACCCGCC -0.0560990742809  
AACCCGCG -0.102705791848  
AACCCGCT -0.210051741771  
AACCCGGA -0.15452547761  
AACCCGGC -0.110507756684  
AACCCGGG -0.106134930865  
AACCCGGT -0.372494787114  
AACCCGTA 0.0221778252081  
AACCCGTC -0.0989531715021  
AACCCGTG -0.0909009291767  
AACCCGTT -0.210724357225  
AACCCCTAA -0.129494062144  
AACCCCTAC -0.078907957138  
AACCCCTAG -0.0664311549479  
AACCCCTAT -0.244629552603  
AACCCCTCA -0.0904831969265  
AACCCCTCC -0.334129231721  
AACCCCTCG -0.245110200174  
AACCCCTCT -0.259808421123  
AACCCCTGA 0.0379594470504  
AACCCCTGC -0.0670372416784  
AACCCCTGG -0.287562975186  
AACCCCTGT -0.144350985728  
AACCCCTTA -0.18656690277  
AACCCCTTC -0.222144461586  
AACCCCTTG -0.147924412079  
AACCGAAA 0.102990872978  
AACCGAAC -0.247160844836  
AACCGAAG 0.0315664620483  
AACCGAAT 0.204914490924  
AACCGACA 0.146968314562  
AACCGACC -0.148841089328  
AACCGACG 0.080657792779

AACCGACT -0.176473426356  
AACCGAGA 0.0321685321685  
AACCGAGC -0.374380826071  
AACCGAGG -0.335692802512  
AACCGAGT -0.0827011898361  
AACCGATA 0.245243534813  
AACCGATC 0.12302723298  
AACCGATG -0.0941627488444  
AACCGATT 0.177662532937  
AACCGCAA 0.0329870158517  
AACCGCAC -0.0488994217932  
AACCGCAG -0.19345420953  
AACCGCAT -0.0750378477651  
AACCGCCA -0.127829157976  
AACCGCCC -0.279858613419  
AACCGCCG -0.106940659796  
AACCGCCT -0.386461964539  
AACCGCGA 0.0699305854616  
AACCGCGC 0.147821177755  
AACCGCGG -0.143995599778  
AACCGCGT 0.0342233381751  
AACCGCTA -0.0585352288668  
AACCGCTC -0.204276947102  
AACCGCTG -0.12225407246  
AACCGCTT -0.164070285145  
AACCGGAA 0.0727132090768  
AACCGGAC -0.297730181407  
AACCGGAG -0.125449140601  
AACCGGAT 0.17271403635  
AACCGGCA -0.0314919078781  
AACCGGCC -0.191718348837  
AACCGGCG -0.370337284355  
AACCGGCT -0.327367295051  
AACCGGGA -0.285218758528  
AACCGGGC -0.234182738968  
AACCGGGG -0.225086492315  
AACCGGGT -0.262063193961  
AACCGGTA -0.0284594537219  
AACCGGTC -0.106681500966  
AACCGGTG -0.268515586813  
AACCGGTT -0.211382281858  
AACCGTAA 0.210126104065  
AACCGTAC -0.179225728853  
AACCGTAG -0.193771106425  
AACCGTAT -0.0780661737334  
AACCGTCA -0.167175095641  
AACCGTCC -0.0127676998288  
AACCGTCG -0.190387958275  
AACCGTCT -0.0156028984788  
AACCGTGA -0.0388374677067  
AACCGTGC -0.0487149916425  
AACCGTGG -0.156585663471  
AACCGTGT -0.0752805146745  
AACCGTTA -0.00534728272868

AACCGTTC -0.121667017135  
AACCGTTG -0.0801320486843  
AACCTAAA 0.0694196477449  
AACCTAAC 0.0216192346153  
AACCTAAG -0.0955665204412  
AACCTAAT 0.0611865308835  
AACCTACA -0.0220259454573  
AACCTACC -0.171591617366  
AACCTACG -0.157527108508  
AACCTACT -0.118917644723  
AACCTAGA -0.0118229412203  
AACCTAGC -0.0580784012074  
AACCTAGG -0.112121563016  
AACCTAGT 0.0186149208411  
AACCTATA -0.107122695352  
AACCTATC -0.0452004163206  
AACCTATG -0.0409078633315  
AACCTATT -0.0557952788779  
AACCTCAA -0.0301251664888  
AACCTCAC -0.151657809738  
AACCTCAG -0.157123677035  
AACCTCAT -0.159395357941  
AACCTCCA -0.17254567276  
AACCTCCC -0.0578211458773  
AACCTCCG -0.345455926486  
AACCTCCT -0.22734351528  
AACCTCGA 0.0576016788138  
AACCTCGC -0.0473332726726  
AACCTCGG -0.162429530386  
AACCTCGT 0.00386198871047  
AACCTCTA -0.200807930402  
AACCTCTC -0.1923093763  
AACCTCTG -0.195885539429  
AACCTCTT -0.0100610252125  
AACCTGAA 0.183796705182  
AACCTGAC -0.180891346416  
AACCTGAG 0.101413107742  
AACCTGAT 0.0252308343613  
AACCTGCA 0.0621468143033  
AACCTGCC -0.157096988405  
AACCTGCG -0.246645881746  
AACCTGCT -0.129504770737  
AACCTGGA -0.281017455733  
AACCTGGC -0.061462157763  
AACCTGGG -0.286720989299  
AACCTGGT -0.238386290225  
AACCTGTA -0.0665023794004  
AACCTGTC -0.174768420269  
AACCTGTG -0.129895575647  
AACCTTAA 0.0125483610332  
AACCTTAC -0.2957187556  
AACCTTAG -0.183882753581  
AACCTTAT -0.242134215669  
AACCTTCA 0.0422961540988

AACCTTCC 0.029966497084  
AACCTTCG -0.305066920483  
AACCTTCT -0.218490210189  
AACCTTGA -0.0315620825821  
AACCTTGC -0.168792337659  
AACCTTGG -0.248485445537  
AACCTTGT -0.169107246859  
AACCTTTA 0.174760159609  
AACCTTTC 0.0511669603196  
AACCTTTG -0.19035648711  
AACGAAAA 0.154755005365  
AACGAAAC 0.177093202339  
AACGAAAG -0.0325876841028  
AACGAAAT 0.30823717978  
AACGAACA -0.139190382692  
AACGAACC -0.21768873451  
AACGAACG 0.0155551338292  
AACGAACT -0.118745411368  
AACGAAGA -0.00530254040222  
AACGAAGC 0.0319093197881  
AACGAAGG -0.146979456944  
AACGAAGT -0.169873942281  
AACGAATA -0.121478227539  
AACGAATC 0.327457792895  
AACGAATG -0.127901578798  
AACGAATT 0.0808177323329  
AACGACAA -0.0442991200567  
AACGACAC -0.284434686491  
AACGACAG -0.0726312562499  
AACGACAT -0.0853560425295  
AACGACCA -0.0112734757633  
AACGACCC -0.0830579012881  
AACGACCG -0.175807197895  
AACGACCT -0.30871452242  
AACGACGA -0.129834383189  
AACGACGC -0.144384827701  
AACGACGG -0.175044190196  
AACGACGT -0.0483379520481  
AACGACTA -0.0300686846273  
AACGACTC 0.164521214864  
AACGACTG -0.134394036047  
AACGACTT 0.0867878898182  
AACGAGAA 0.104069983869  
AACGAGAC 0.0636533506566  
AACGAGAG -0.0618415616985  
AACGAGAT 0.282060297212  
AACGAGCA 0.0817551440479  
AACGAGCC -0.151151866551  
AACGAGCG 0.0663773785975  
AACGAGCT 0.0571880420365  
AACGAGGA -0.0290044743546  
AACGAGGC -0.119551396685  
AACGAGGG -0.307013790709  
AACGAGGT -0.120465064028

AACGAGTA 0.0496857733042  
AACGAGTC -0.183886559082  
AACGAGTG -0.183103833271  
AACGAGTT -0.0567089771757  
AACGATAA 0.145331281695  
AACGATAC -0.146707313374  
AACGATAG -0.0351649233958  
AACGATAT 0.279264112597  
AACGATCA 0.0464638191911  
AACGATCC 0.182126668759  
AACGATCG 0.146901162748  
AACGATCT 0.140447610145  
AACGATGA -0.0774751838271  
AACGATGC -0.0717315111255  
AACGATGG -0.0842958210058  
AACGATGT -0.201595848808  
AACGATTA 0.185084268228  
AACGATTC 0.259751487024  
AACGATTG 0.0768063473063  
AACGAAA 0.0802248529521  
AACGCAAC 0.169902685054  
AACGCAAG -0.0803697729247  
AACGCAAT 0.33088873998  
AACGCACA 0.00733633570068  
AACGCACC -0.272945174994  
AACGCACG -0.196842123702  
AACGCACT -0.0302278052305  
AACGCAGA 0.195650460209  
AACGCAGC -0.0594555696171  
AACGCAGG -0.286853528463  
AACGCAGT -0.118582028439  
AACGCATA 0.0333267151449  
AACGCATC 0.000784531087561  
AACGCATG -0.202609676148  
AACGCATT -0.106874302023  
AACGCCAA -0.156196048271  
AACGCCAC -0.266452595774  
AACGCCAG -0.359063976807  
AACGCCAT -0.0579308557422  
AACGCCCA -0.0814924067595  
AACGCCCC -0.330846054281  
AACGCCCG 0.0456719154396  
AACGCCCT -0.354742513815  
AACGCCGA -0.231781323496  
AACGCCGC -0.0904333497287  
AACGCCGG -0.107681194185  
AACGCCGT -0.298867740076  
AACGCCTA -0.144093297339  
AACGCCTC -0.111683251855  
AACGCCTG -0.182669491027  
AACGCCTT -0.111749490537  
AACGCGAA 0.156072050011  
AACGCGAC -0.129268864348  
AACGCGAG -0.18126075653

AACGCGAT 0.377574544241  
AACGCGCA -0.0246017367229  
AACGCGCC -0.113318815852  
AACGCGCG -0.071734268704  
AACGCGCT -0.130969463498  
AACGCGGA -0.0705737837731  
AACGCGGC -0.0752362239781  
AACGCGGG -0.11659236099  
AACGCGGT -0.169494423074  
AACGCGTA -0.0889476165662  
AACGCGTC 0.0750552150284  
AACGCGTG -0.211342196191  
AACGCGTT 0.076288173857  
AACGCTAA 0.0791622205127  
AACGCTAC -0.117093111346  
AACGCTAG -0.0799687321637  
AACGCTAT -0.0582745279715  
AACGCTCA -0.0714161641728  
AACGCTCC 0.0211666897805  
AACGCTCG -0.0801238305581  
AACGCTCT -0.173193371133  
AACGCTGA 0.125289201047  
AACGCTGC -0.118395217623  
AACGCTGG -0.167287060244  
AACGCTGT -0.057530870324  
AACGCTTA -0.0853014342788  
AACGCTTC 0.0937921392467  
AACGCTTG -0.121322708466  
AACGAAA 0.156546353516  
AACGGAAC -0.016190812628  
AACGGAAG -0.149306391704  
AACGGAAT 0.240331195814  
AACGGACA 0.106243525719  
AACGGACC -0.170392064421  
AACGGACG -0.0471453823843  
AACGGACT -0.245011205663  
AACGGAGA -0.00681517922965  
AACGGAGC -0.355051970926  
AACGGAGG -0.291813775358  
AACGGAGT -0.05554728282  
AACGGATA 0.19550155836  
AACGGATC 0.260460719838  
AACGGATG -0.0506737474254  
AACGGATT 0.404527290327  
AACGGCAA 0.00987528710436  
AACGGCAC -0.0868764021328  
AACGGCAG -0.18610497763  
AACGGCAT -0.110667612537  
AACGGCCA -0.325041187123  
AACGGCCC -0.261128351929  
AACGGCCG 0.00340581857138  
AACGGCCT -0.185858625656  
AACGGCGA 0.0795782733582  
AACGGCGC -0.0464541092981

AACGGCGG -0.205057625983  
AACGGCGT -0.16199510927  
AACGGCTA -0.0414947117946  
AACGGCTC -0.0356043298322  
AACGGCTG -0.244753188652  
AACGGCTT -0.206046212775  
AACGGGAA -0.0836531401403  
AACGGGAC -0.270627458439  
AACGGGAG -0.0165676104921  
AACGGGAT 0.0758662219075  
AACGGGCA -0.096018292674  
AACGGGCC -0.323067827583  
AACGGGCG -0.137401372106  
AACGGGCT -0.19040478119  
AACGGGGA -0.261769279683  
AACGGGGC 0.059374801799  
AACGGGGG -0.0495527732758  
AACGGGGT -0.169333180341  
AACGGGTA -0.0881199738997  
AACGGGTC -0.377461740705  
AACGGGTG -0.276492222581  
AACGGTAA 0.0780463659252  
AACGGTAC -0.0207118214986  
AACGGTAG -0.0848380577406  
AACGGTAT -0.098378137705  
AACGGTCA -0.0289826409212  
AACGGTCC -0.131558268609  
AACGGTCG -0.129333963914  
AACGGTCT -0.132860096197  
AACGGTGA -0.0607315304285  
AACGGTGC -0.110766499323  
AACGGTGG -0.135087145699  
AACGGTGT -0.107111316125  
AACGGTTA -0.0298687116869  
AACGGTTC -0.308500387141  
AACGGTTG 0.0328348775051  
AACGTAAC 0.111421647701  
AACGTAAC 0.202975702976  
AACGTAAG -0.0313908950273  
AACGTAAT 0.349789183123  
AACGTACA -0.0507948325544  
AACGTACC -0.228005669019  
AACGTACG -0.0689948395291  
AACGTACT 0.0757289986351  
AACGTAGA 0.0856514090932  
AACGTAGC -0.02134016042  
AACGTAGG -0.11621074632  
AACGTAGT -0.11676021693  
AACGTATA 0.250168901684  
AACGTATC 0.342330459917  
AACGTATG -0.162260655807  
AACGTATT 0.183975987006  
AACGTCAA 0.0440625387765  
AACGTCAC -0.0440143646489



AACGTCAG -0.0637235031174  
AACGTCAT -0.0804675198615  
AACGTCCA -0.27697802675  
AACGTCCC -0.396630879398  
AACGTCCG -0.344431488327  
AACGTCCT -0.303206108975  
AACGTCGA 0.0755246235484  
AACGTCGC 0.0206473691322  
AACGTCGG -0.147638200342  
AACGTCGT 0.111728210331  
AACGTCTA -0.0811816185774  
AACGTCTC -0.131455560113  
AACGTCTG -0.0843997738898  
AACGTCTT -0.0661646857819  
AACGTGAA -0.0479763216864  
AACGTGAC -0.201598548887  
AACGTGAG 0.0896498616819  
AACGTGAT 0.0968916574977  
AACGTGCA -0.124579023817  
AACGTGCC -0.229419758906  
AACGTGCG -0.0893542988384  
AACGTGCT -0.0849008611063  
AACGTGGA 0.0177985733116  
AACGTGGC -0.113038356952  
AACGTGGG 0.0367040350398  
AACGTGGT -0.317868691129  
AACGTGTA -0.112967787289  
AACGTGTC -0.143966074632  
AACGTGTG -0.109798034496  
AACGTTAA 0.161082570173  
AACGTTAC 0.0369620223401  
AACGTTAG -0.107131230703  
AACGTTAT 0.0103064497004  
AACGTTCA -0.136421790428  
AACGTTCC -0.144309060779  
AACGTTCG -0.168438322924  
AACGTTCT -0.0886484032529  
AACGTTGA 0.0797581074867  
AACGTTGC -0.0772165391514  
AACGTTGG -0.0865755588286  
AACGTTGT -0.00749837594797  
AACGTTTA -0.0877302959494  
AACGTTTC 0.00896257746181  
AACGTTTG 0.0592125719875  
AACTAAAA 0.222074691772  
AACTAAAC 0.092683371897  
AACTAAAG 0.0341766238696  
AACTAAAT 0.103655997595  
AACTAACA 0.0368260822806  
AACTAACC -0.227239769854  
AACTAACG 0.103579483661  
AACTAACT -0.0432260607432  
AACTAAGA -0.0278687328015  
AACTAAGC -0.138340901759

AACTAAGG -0.179459817182  
AACTAAGT -0.0810689906313  
AACTAATA 0.00143959889796  
AACTAATC -0.0380035683066  
AACTAATG 0.0552467067619  
AACTAATT 0.12614249323  
AACTACAA 0.0495909132273  
AACTACAC -0.177333858739  
AACTACAG -0.288850573762  
AACTACAT -0.0433486857952  
AACTACCA 0.0332108968473  
AACTACCC -0.0456960796479  
AACTACCG 0.0923802590469  
AACTACCT -0.0550447800413  
AACTACGA -0.0502556402174  
AACTACGC 0.0148485799581  
AACTACGG 0.000396341685948  
AACTACGT -0.138994361032  
AACTACTA 0.118005445136  
AACTACTC 0.145692430093  
AACTACTG 0.0612125281928  
AACTACTT 0.184751428801  
AACTAGAA 0.240023211171  
AACTAGAC -0.19229410743  
AACTAGAG -0.188884640028  
AACTAGAT 0.148587981921  
AACTAGCA 0.00898301497048  
AACTAGCC 0.00588053618357  
AACTAGCG -0.038005310569  
AACTAGCT -0.0768098340411  
AACTAGGA 0.0447155144125  
AACTAGGC 0.0703977285169  
AACTAGGG -0.131701641342  
AACTAGGT -0.102288303464  
AACTAGTA 0.00851502664641  
AACTAGTC -0.153878773635  
AACTAGTG -0.203111000841  
AACTAGTT 0.212791159179  
AACTATAA 0.203411400381  
AACTATAC -0.131990116839  
AACTATAG 0.120297365751  
AACTATAT 0.109310685813  
AACTATCA 0.0749413325171  
AACTATCC 0.15062370897  
AACTATCG 0.0564076473167  
AACTATCT -0.0956913249927  
AACTATGA 0.0876280081458  
AACTATGC 0.0858916768008  
AACTATGG 0.0432484826424  
AACTATGT -0.107659999504  
AACTATTA 0.0639275639276  
AACTATTC 0.130332812151  
AACTATTG 0.141169901389  
AACTCAA 0.0562111778574

AACTCAAC 0.0402978736312  
AACTCAAG -0.124842504597  
AACTCAAT -0.0755314299001  
AACTCACA -0.0517418244691  
AACTCACC -0.25767601307  
AACTCACG -0.143481332386  
AACTCACT -0.0692337336453  
AACTCAGA -0.0166602191193  
AACTCAGC -0.190875979829  
AACTCAGG -0.0249315708415  
AACTCAGT -0.0310186219277  
AACTCATA -0.0758338089684  
AACTCATC -0.196039838683  
AACTCATG -0.1961475159  
AACTCATT -0.107323927213  
AACTCCAA 0.0274916790068  
AACTCCAC -0.123447850249  
AACTCCAG -0.369661564921  
AACTCCAT -0.161203150838  
AACTCCCA -0.327631016853  
AACTCCCC -0.34120920464  
AACTCCCCG -0.0558850861881  
AACTCCCT -0.271630818593  
AACTCCGA -0.156219757314  
AACTCCGC -0.0351794405151  
AACTCCGG -0.127566277721  
AACTCCGT -0.0974424728737  
AACTCCTA -0.0486478398283  
AACTCCTC 0.0308316210098  
AACTCCTG -0.149078715967  
AACTCCTT -0.0362166574288  
AACTCGAA 0.088277628957  
AACTCGAC -0.176309309919  
AACTCGAG -0.132564948761  
AACTCGAT 0.0481921731146  
AACTCGCA 0.0601439384539  
AACTCGCC -0.228825207374  
AACTCGCG 0.0233593424961  
AACTCGCT -0.116877900196  
AACTCGGA -0.156674303264  
AACTCGGC 0.0144325578069  
AACTCGGG -0.0990184643726  
AACTCGGT -0.127971193109  
AACTCGTA -0.0322760777306  
AACTCGTC -0.0803075803076  
AACTCGTG -0.104264140201  
AACTCTAA 0.0470434953979  
AACTCTAC -0.0763584905936  
AACTCTAG -0.0681014284359  
AACTCTAT -0.158197265753  
AACTCTCA -0.178981557304  
AACTCTCC -0.24068835455  
AACTCTCG -0.0778355218499  
AACTCTCT -0.222999666416

AACTCTGA -0.0231114854558  
AACTCTGC 0.0665665665666  
AACTCTGG -0.163222269085  
AACTCTGT -0.00646190229411  
AACTCTTA 0.0569410888813  
AACTCTTC -0.199149196415  
AACTCTTG 0.0168310182989  
AACTGAAA 0.184812741327  
AACTGAAC -0.0256760800858  
AACTGAAG -0.238644154114  
AACTGAAT 0.0549488882822  
AACTGACA -0.0385605991667  
AACTGACC -0.318715609182  
AACTGACG 0.0877783698167  
AACTGACT -0.125429752226  
AACTGAGA -0.0321688211796  
AACTGAGC -0.118436906347  
AACTGAGG -0.0748484640612  
AACTGAGT -0.144051252781  
AACTGATA 0.172760450501  
AACTGATC 0.0923213360291  
AACTGATG -0.121545126649  
AACTGATT 0.283879185127  
AACTGCAA -0.0264024354933  
AACTGCAC -0.237478090946  
AACTGCAG -0.246223825113  
AACTGCAT -0.151234338171  
AACTGCCA -0.180979751616  
AACTGCCC -0.158230637979  
AACTGCCG -0.0691962949716  
AACTGCCT -0.176916453221  
AACTGCGA -0.140425320728  
AACTGCGC 0.115658051284  
AACTGCGG 0.0652594743504  
AACTGCGT -0.154651540894  
AACTGCTA -0.0164089709544  
AACTGCTC -0.0809144877066  
AACTGCTG -0.0652424596728  
AACTGCTT 0.0137945884397  
AACTGGAA 0.170707940702  
AACTGGAC -0.204740885411  
AACTGGAG -0.253727270472  
AACTGGAT 0.177299889421  
AACTGGCA -0.0884469368006  
AACTGGCC -0.162574057073  
AACTGGCG -0.130940548903  
AACTGGCT -0.283199479473  
AACTGGGA -0.210845648536  
AACTGGGC -0.281882510578  
AACTGGGG -0.09093064481  
AACTGGGT -0.220583765477  
AACTGGTA -0.170746383464  
AACTGGTC -0.211495992655  
AACTGGTG -0.208712245598

AACTGTAA 0.0617384668834  
AACTGTAC -0.106205623299  
AACTGTAG -0.128192931223  
AACTGTAT -0.0973090975974  
AACTGTCA -0.112521472511  
AACTGTCC -0.102361290944  
AACTGTCCG -0.147973094047  
AACTGTCT -0.0698311383311  
AACTGTGA 0.0440123318911  
AACTGTGC -0.04735727463  
AACTGTGG -0.0655101610382  
AACTGTGT -0.173868713718  
AACTGTTA 0.1104451559  
AACTGTTC -0.0612285862353  
AACTGTTG -0.0807267322419  
AACTTAAA 0.224071178617  
AACTTAAC 0.00580060290651  
AACTTAAG -0.110123865901  
AACTTAAT -0.0415647832529  
AACTTACA -0.127762748975  
AACTTACC -0.0323526086945  
AACTTACG 0.183452187178  
AACTTACT -0.0246323073217  
AACTTAGA -0.0353438221208  
AACTTAGC 0.104446617957  
AACTTAGG 0.0791128661416  
AACTTAGT -0.0840426851967  
AACTTATA 0.0877520930199  
AACTTATC 0.147035465217  
AACTTATG -0.00428396572827  
AACTTATT 0.165753304672  
AACTTCAA 0.0396139941594  
AACTTCAC -0.183142123736  
AACTTCAG 0.0748365445335  
AACTTCAT -0.134358172659  
AACTTCCA -0.373530651875  
AACTTCCC -0.11678423654  
AACTTCCG -0.143405614237  
AACTTCCT -0.218774554808  
AACTTCGA -0.0200820419991  
AACTTCGC 0.140016641971  
AACTTCGG -0.266835339947  
AACTTCGT -0.0893622767385  
AACTTCTA 0.0445712642453  
AACTTCTC 0.165394188448  
AACTTCTG -0.283509563111  
AACTTCTT 0.121511937695  
AACTTGAA 0.246148624483  
AACTTGAC -0.0977424137161  
AACTTGAG 0.0341369741435  
AACTTGAT -0.0617601072147  
AACTTGCA 0.06173806413  
AACTTGCC -0.124993248658  
AACTTGCG -0.0405837828369

AACTTGCT -0.0923461530039  
AACTTGGA -0.244514741761  
AACTTGGC 0.12517317139  
AACTTGGG -0.22932846993  
AACTTGGT -0.0084699024093  
AACTTGTA 0.120107711017  
AACTTGTC -0.144400850005  
AACTTGTG -0.209998924758  
AACTTTAA 0.0467450921996  
AACTTTAC -0.0622446223805  
AACTTTAG -0.123949017888  
AACTTTAT 0.0259913889371  
AACTTTCA -0.07801879014  
AACTTTCC 0.00109062230274  
AACTTTCG -0.111473047913  
AACTTTCT -0.108520981292  
AACTTTGA -0.163810098905  
AACTTTGC 0.106639270673  
AACTTTGG -0.000832828478209  
AACTTTGT -0.125471452321  
AACTTTTA 0.0495539370176  
AACTTTTC 0.092441041437  
AACTTTTG -0.0975834477138  
AAGAAAAA 0.138731998569  
AAGAAAAC -0.244152889517  
AAGAAAAG 0.0505996219061  
AAGAAAAT 0.323352277898  
AAGAAACA -0.156678825777  
AAGAAACC -0.021915578491  
AAGAAACG -0.00940287601164  
AAGAAACT -0.239877096488  
AAGAAAGA -0.150590133063  
AAGAAAGC -0.103896808854  
AAGAAAGG -0.107573596918  
AAGAAAGT 0.0546565849596  
AAGAAATA 0.282699283763  
AAGAAATC 0.439413242444  
AAGAAATG -0.0820544075677  
AAGAAATT 0.128335145946  
AAGAACAA 0.263478050475  
AAGAACAC -0.162494521216  
AAGAACAG -0.0373307191489  
AAGAACAT 0.093603059787  
AAGAACCA -0.285353450579  
AAGAACCC -0.153557250961  
AAGAACCG -0.00557433048911  
AAGAACCT -0.242869283641  
AAGAACGA -0.0691325243401  
AAGAACGC -0.145515710524  
AAGAACGG -0.0815543590041  
AAGAACGT -0.130977684048  
AAGAACTA 0.00811968993787  
AAGAACTC -0.0595248928045  
AAGAACTG -0.0239483806924

AAGAACTT 0.00818035666521  
AAGAAGAA 0.0376831975293  
AAGAAGAC -0.317850602972  
AAGAAGAG -0.0360172938156  
AAGAAGAT 0.247058353119  
AAGAAGCA -0.159765709941  
AAGAAGCC -0.115539805698  
AAGAAGCG -0.00859032283965  
AAGAAGCT -0.182671182383  
AAGAAGGA 0.0283273704326  
AAGAAGGC -0.0914423639769  
AAGAAGGG -0.141174864943  
AAGAAGGT -0.140122093456  
AAGAAGTA 0.0170908666234  
AAGAAGTC -0.0183077266748  
AAGAAGTG -0.330221589641  
AAGAATAA 0.135464916827  
AAGAATAC -0.0342919732629  
AAGAATAG -0.0939242206375  
AAGAATAT 0.326358038479  
AAGAATCA 0.324421363036  
AAGAATCC 0.46630022086  
AAGAATCG 0.397152617096  
AAGAATCT 0.438790039306  
AAGAATGA 0.0185390100947  
AAGAATGC -0.259033243386  
AAGAATGG 0.147007889432  
AAGAATGT -0.0989921888799  
AAGAATTA 0.153210513638  
AAGAATTC 0.131910250141  
AAGAATTG -0.106212759152  
AAGACAAA 0.213607712733  
AAGACAAC -0.251056231657  
AAGACAAG 0.0259023525032  
AAGACAAT 0.101838753354  
AAGACACA -0.0765461995116  
AAGACACC -0.155699196877  
AAGACACG -0.0983393862182  
AAGACACT -0.262219244776  
AAGACAGA 0.0369356875397  
AAGACAGC 0.0562504653414  
AAGACAGG 0.214477562962  
AAGACAGT 0.214832521916  
AAGACATA 0.0583439778691  
AAGACATC 0.0740718912078  
AAGACATG -0.073480304973  
AAGACATT -0.00885309080823  
AAGACCAA 0.0495964283843  
AAGACCAC -0.254161918284  
AAGACCAG -0.138264268709  
AAGACCAT -0.117111006334  
AAGACCCA -0.322681549734  
AAGACCCC -0.23826002828  
AAGACCCG -0.262713347007

AAGACCCT -0.318838179481  
AAGACCGA -0.253408234613  
AAGACCGC -0.30708537911  
AAGACCGG -0.333421139811  
AAGACCGT -0.12183801454  
AAGACCTA -0.0805229504264  
AAGACCTC -0.279353765567  
AAGACCTG -0.112498047682  
AAGACCTT -0.0226567141087  
AAGACGAA -0.159001309265  
AAGACGAC -0.273296082373  
AAGACGAG -0.0288344623936  
AAGACGAT 0.212980007737  
AAGACGCA -0.141406622611  
AAGACGCC -0.367395779084  
AAGACGCG -0.0570638761357  
AAGACGCT -0.0440713023094  
AAGACGGA -0.178524574135  
AAGACGGC -0.258608864171  
AAGACGGG -0.0241238411608  
AAGACGGT -0.113761935278  
AAGACGTA -0.0382578472489  
AAGACGTC 0.0461530039488  
AAGACGTG -0.0670020185331  
AAGACTAA 0.0415837609395  
AAGACTAC -0.155946797687  
AAGACTAG 0.081544531851  
AAGACTAT 0.00652759428626  
AAGACTCA -0.174172326565  
AAGACTCC -0.288040167484  
AAGACTCG -0.100791031484  
AAGACTCT -0.347700566596  
AAGACTGA -0.116138707065  
AAGACTGC -0.216772301994  
AAGACTGG 0.131538948309  
AAGACTGT -0.0256288193125  
AAGACTTA 0.0140456778319  
AAGACTTC 0.00325807901565  
AAGACTTG -0.120059175312  
AAGAGAAA 0.0492828624191  
AAGAGAAC -0.226216962068  
AAGAGAAG -0.115084595589  
AAGAGAAT 0.283182609673  
AAGAGACA -0.0328993077095  
AAGAGACC -0.119428144307  
AAGAGACG -0.255121101257  
AAGAGACT -0.265842590065  
AAGAGAGA -0.22766771018  
AAGAGAGC -0.24730852472  
AAGAGAGG -0.115819886581  
AAGAGAGT -0.0984998249198  
AAGAGATA 0.318951339531  
AAGAGATC 0.365524112611  
AAGAGATG 0.0697466478836



AAGAGATT 0.375628486968  
AAGAGCAA 0.0120865966439  
AAGAGCAC -0.182523055784  
AAGAGCAG 0.0762379339438  
AAGAGCAT -0.156996709628  
AAGAGCCA -0.125067743423  
AAGAGCCC -0.160444047432  
AAGAGCCG -0.0824900048607  
AAGAGCCT -0.186097807776  
AAGAGCGA -0.0622008277191  
AAGAGCGC -0.0254746246433  
AAGAGCGG -0.126974872155  
AAGAGCGT 0.020813412845  
AAGAGCTA 0.0126961720986  
AAGAGCTC -0.405556974123  
AAGAGCTG -0.234982692049  
AAGAGCTT -0.121758443557  
AAGAGGAA -0.191104990502  
AAGAGGAC -0.290342566821  
AAGAGGAG -0.2223297411  
AAGAGGAT 0.296836565623  
AAGAGGCA -0.159955788899  
AAGAGGCC -0.224785381891  
AAGAGGCG -0.21727299799  
AAGAGGCT -0.303586047781  
AAGAGGGA -0.290521522031  
AAGAGGGC -0.190812925423  
AAGAGGGG -0.101754823868  
AAGAGGGT -0.359520498269  
AAGAGGTA -0.102114675304  
AAGAGGTC -0.188287304699  
AAGAGGTG -0.281908287888  
AAGAGTAA -0.0486478398283  
AAGAGTAC -0.292024155781  
AAGAGTAG 0.0267389631983  
AAGAGTAT 0.136974372824  
AAGAGTCA 0.0833498771621  
AAGAGTCC -0.186749510011  
AAGAGTCG 0.04190492179  
AAGAGTCT -0.373486003604  
AAGAGTGA -0.0918423353658  
AAGAGTGC -0.182040782562  
AAGAGTGG -0.0725598541937  
AAGAGTGT -0.138533885897  
AAGAGTTA 0.0307483792332  
AAGAGTTC -0.103996911665  
AAGAGTTG -0.204151347659  
AAGATAAA 0.0325620606848  
AAGATAAC -0.0576695400831  
AAGATAAG 0.0913520141895  
AAGATAAT 0.184735653385  
AAGATACA -0.0120657847931  
AAGATACC 0.280925347048  
AAGATACG 0.334756903134

AAGATACT 0.284480631811  
AAGATAGA 0.0384309929764  
AAGATAGC 0.159972409363  
AAGATAGG 0.112612612613  
AAGATAGT 0.0401572371269  
AAGATATA 0.310435780133  
AAGATATC 0.477331883243  
AAGATATG 0.37345472194  
AAGATATT 0.429201929202  
AAGATCAA 0.233290511887  
AAGATCAC 0.159636650292  
AAGATCAG 0.162199389472  
AAGATCAT 0.228716319625  
AAGATCCA 0.306853685642  
AAGATCCC 0.27626938233  
AAGATCCG 0.322240568287  
AAGATCCT 0.333317518594  
AAGATCGA 0.218015536197  
AAGATCGC 0.403517441224  
AAGATCGG 0.186474353141  
AAGATCGT 0.301616745663  
AAGATCTA 0.351095231491  
AAGATCTC 0.402315914877  
AAGATCTG 0.350271111993  
AAGATCTT 0.409469349277  
AAGATGAA -0.0169521835288  
AAGATGAC -0.0199607320819  
AAGATGAG -0.0527553735644  
AAGATGAT 0.104378483166  
AAGATGCA -0.117743149467  
AAGATGCC -0.0794646832551  
AAGATGCG -0.0339328335876  
AAGATGCT -0.142904376183  
AAGATGGA -0.139049501893  
AAGATGGC -0.0794130054315  
AAGATGGG 0.0108123867894  
AAGATGGT -0.104059765115  
AAGATGTA 0.175356518172  
AAGATGTC 0.0199404392605  
AAGATGTG -0.273337127929  
AAGATTAA 0.112155777247  
AAGATTAC 0.434973541034  
AAGATTAG 0.11060122771  
AAGATTAT 0.260857276009  
AAGATTCA 0.183586490807  
AAGATTCC 0.466802739658  
AAGATTCCG 0.420352109078  
AAGATTCT 0.451732443815  
AAGATTGA 0.101138559088  
AAGATTGC 0.462797894937  
AAGATTGG 0.197624139617  
AAGATTGT 0.268076616561  
AAGATTTA 0.379727399062  
AAGATTTTC 0.480832536514

AAGATTTG 0.392306007898  
AAGCAAAA 0.0142996868682  
AAGCAAAC -0.165691067354  
AAGCAAAG -0.17096368289  
AAGCAAAT 0.238173435143  
AAGCAACA -0.193178403562  
AAGCAACC -0.281849915287  
AAGCAACG -0.173912377071  
AAGCAACT -0.191798166168  
AAGCAAGA 0.0901462011781  
AAGCAAGC -0.180641408694  
AAGCAAGG -0.0357744973967  
AAGCAAGT 0.0792321246867  
AAGCAATA 0.0814544207061  
AAGCAATC 0.367798928405  
AAGCAATG 0.0214443093231  
AAGCAATT 0.0371984555083  
AAGCACAA -0.00605899140895  
AAGCACAC -0.209568582699  
AAGCACAG -0.176364701942  
AAGCACAT -0.0888586071945  
AAGCACCA -0.155051294564  
AAGCACCC -0.314452021908  
AAGCACCG -0.137976712311  
AAGCACCT -0.109362979874  
AAGCACGA -0.0492025722064  
AAGCACGC -0.132845849283  
AAGCACGG 0.0369506230323  
AAGCACGT -0.0852017839025  
AAGCACTA -0.092807456771  
AAGCACTC -0.252112828162  
AAGCACTG -0.0045552935986  
AAGCACTT -0.0471375040326  
AAGCAGAA 0.0352218564557  
AAGCAGAC -0.149687183772  
AAGCAGAG -0.111788644588  
AAGCAGAT 0.221104024134  
AAGCAGCA -0.0693762653576  
AAGCAGCC -0.312194911952  
AAGCAGCG -0.199316154472  
AAGCAGCT -0.347572159616  
AAGCAGGA -0.105644595133  
AAGCAGGC -0.262914021313  
AAGCAGGG -0.140480227157  
AAGCAGGT 0.0892779832174  
AAGCAGTA 0.0717810821014  
AAGCAGTC -0.15991887204  
AAGCAGTG -0.132289245649  
AAGCATAA 0.0353573248045  
AAGCATAC -0.0464858798192  
AAGCATAG -0.0279880431396  
AAGCATAT 0.192453449924  
AAGCATCA 0.0866309496872  
AAGCATCC -0.136436712194

AAGCATCG -0.0324495670083  
AAGCATCT -0.110675678635  
AAGCATGA -0.0536119467714  
AAGCATGC -0.260039421632  
AAGCATGG -0.17405835203  
AAGCATGT -0.0588841060134  
AAGCATT A -0.0126632263527  
AAGCATTC -0.192349569657  
AAGCATTG -0.396080555487  
AAGCCAAA -0.239774860839  
AAGCCAAC -0.262496479402  
AAGCCAAG -0.237740780685  
AAGCCAAT -0.0103522464046  
AAGCCACA -0.236742703433  
AAGCCACC -0.390511811541  
AAGCCACG -0.164366557937  
AAGCCACT -0.250483398103  
AAGCCAGA -0.0609305733758  
AAGCCAGC -0.205439915317  
AAGCCAGG -0.134661785506  
AAGCCAGT 0.0280680129165  
AAGCCATA -0.153511415732  
AAGCCATC 0.00594337047423  
AAGCCATG -0.164045703143  
AAGCCATT -0.0634794007436  
AAGCCCAA -0.0856773251524  
AAGCCCAC -0.157390773919  
AAGCCCAG -0.26804098137  
AAGCCCAT -0.112153444882  
AAGCCCCA -0.352661258982  
AAGCCCCC -0.245255637419  
AAGCCCCG -0.336046822503  
AAGCC CCT -0.316674087412  
AAGCCCGA -0.243737606173  
AAGCCCGC -0.313842685619  
AAGCCCGG -0.308175260876  
AAGCCCGT -0.056213205388  
AAGCCCTA -0.275671615046  
AAGCCCTC -0.174834128579  
AAGCCCTG -0.231352113007  
AAGCCCTT -0.309107445533  
AAGCCGAA -0.0350422983438  
AAGCCGAC -0.185815532455  
AAGCCGAG -0.253175143072  
AAGCCGAT 0.175726808902  
AAGCCGCA -0.121516317161  
AAGCCGCC -0.480328580285  
AAGCCGCG -0.143634193209  
AAGCCGCT -0.477433353999  
AAGCCGGA -0.186933666463  
AAGCCGGC -0.363824397618  
AAGCCGGG -0.233117549285  
AAGCCGGT -0.189153865879  
AAGCCGTA -0.142079146508

AAGCCGTC -0.273285621093  
AAGCCGTG -0.213878733481  
AAGCCTAA -0.240466916417  
AAGCCTAC -0.226520574735  
AAGCCTAG -0.248493547318  
AAGCCTAT 0.00849751052062  
AAGCCTCA -0.209083590426  
AAGCCTCC -0.182879673042  
AAGCCTCG -0.249245300184  
AAGCCTCT -0.33592007062  
AAGCCTGA -0.119445064838  
AAGCCTGC -0.304180353826  
AAGCCTGG -0.163721670897  
AAGCCTGT -0.0724721356467  
AAGCCTTA -0.0829044336108  
AAGCCTTC -0.332450335957  
AAGCCTTG -0.23967836475  
AAGCGAAA 0.0511256482791  
AAGCGAAC -0.316177838696  
AAGCGAAG -0.239874632399  
AAGCGAAT 0.257614363675  
AAGCGACA -0.0946800885776  
AAGCGACC -0.303701435312  
AAGCGACG -0.129593330521  
AAGCGACT -0.373229654984  
AAGCGAGA -0.0264367950322  
AAGCGAGC -0.0338581619709  
AAGCGAGG -0.109711245868  
AAGCGAGT -0.0223535251053  
AAGCGATA 0.222560819836  
AAGCGATC 0.325571702809  
AAGCGATG 0.0336383215171  
AAGCGATT 0.226195776735  
AAGCGCAA 0.101505086354  
AAGCGCAC -0.146818024602  
AAGCGCAG -0.0830359241143  
AAGCGCAT 0.0159726429348  
AAGCGCCA -0.137130417759  
AAGCGCCC -0.284808944294  
AAGCGCCG -0.159669321688  
AAGCGCCT -0.253697317532  
AAGCGCGA 0.0673221430797  
AAGCGCGC 0.0210002700671  
AAGCGCGG 0.0102899042293  
AAGCGCGT 0.0854251366758  
AAGCGCTA -0.233100927144  
AAGCGCTC -0.103165590695  
AAGCGCTG -0.275416326751  
AAGCGCTT 0.0198002199565  
AAGCGGAA -0.20628185936  
AAGCGGAC -0.0863750279149  
AAGCGGAG -0.17801373731  
AAGCGGAT 0.200964212463  
AAGCGGCA -0.183779196119

AAGCGGCC -0.436103746232  
AAGCGGCG -0.10150324365  
AAGCGGCT -0.37597530558  
AAGCGGGA -0.0927686092843  
AAGCGGGC -0.179975481074  
AAGCGGGG 0.058049413964  
AAGCGGGT -0.0264341710978  
AAGCGGTA -0.0545659584097  
AAGCGGTC -0.267223075879  
AAGCGGTG -0.139049462045  
AAGCGTAA 0.0874484500339  
AAGCGTAC -0.225301730273  
AAGCGTAG 0.047075611483  
AAGCGTAT 0.0248416460538  
AAGCGTCA 0.0293254687194  
AAGCGTCC -0.333384328286  
AAGCGTCG -0.0601745947169  
AAGCGTCT 0.0499851105541  
AAGCGTGA -0.105845424942  
AAGCGTGC -0.280235549049  
AAGCGTGG -0.194103927455  
AAGCGTGT -0.145624670896  
AAGCGTTA 0.0206611570248  
AAGCGTTC -0.0635492341804  
AAGCGTTG -0.0860705118131  
AAGCTAAA -0.0858515230297  
AAGCTAAC -0.326972619275  
AAGCTAAG -0.223232006847  
AAGCTAAT -0.0636285336817  
AAGCTACA -0.0994572920361  
AAGCTACC -0.163115800842  
AAGCTACG -0.189748591916  
AAGCTACT -0.303531808046  
AAGCTAGA 0.12110902681  
AAGCTAGC -0.182812985751  
AAGCTAGG -0.034631829256  
AAGCTAGT -0.0627142293809  
AAGCTATA 0.106317060863  
AAGCTATC 0.0656182711327  
AAGCTATG -0.00380502616731  
AAGCTATT -0.0594382261049  
AAGCTCAA 0.0355796567918  
AAGCTCAC -0.253275554563  
AAGCTCAG -0.0824495218339  
AAGCTCAT -0.146762509068  
AAGCTCCA -0.256874650167  
AAGCTCCC -0.235782185874  
AAGCTCCG -0.210926652778  
AAGCTCCT -0.26936870629  
AAGCTCGA -0.178676671274  
AAGCTCGC -0.375001468697  
AAGCTCGG 0.0177127508157  
AAGCTCGT -0.0220951293948  
AAGCTCTA -0.212599120486

AAGCTCTC -0.20763890612  
AAGCTCTG -0.26224896277  
AAGCTGAA -0.192764889936  
AAGCTGAC -0.138834434822  
AAGCTGAG -0.139006184345  
AAGCTGAT 0.0213244697458  
AAGCTGCA -0.165963623731  
AAGCTGCC -0.344354872049  
AAGCTGCG -0.215302161176  
AAGCTGCT -0.406950817865  
AAGCTGGA -0.204234622766  
AAGCTGGC -0.235942750993  
AAGCTGGG 0.0544885878411  
AAGCTGGT -0.258754263059  
AAGCTGTA 0.0903853073277  
AAGCTGTC -0.0892807407959  
AAGCTGTG -0.144983677561  
AAGCTTAA 0.0872732236369  
AAGCTTAC -0.23960616613  
AAGCTTAG -0.0943501851692  
AAGCTTAT 0.00935526959264  
AAGCTTCA -0.0105232537299  
AAGCTTCC -0.0909078303414  
AAGCTTCG 0.0190470281673  
AAGCTTCT -0.126824230126  
AAGCTTGA 0.0314146405553  
AAGCTTGC -0.287426753359  
AAGCTTGG 0.0126077531149  
AAGCTTGT -0.079571306844  
AAGCTTTA -0.158812873769  
AAGCTTTC 0.0640295943326  
AAGCTTTG -0.121510286126  
AAGGAAAA 0.0852637913492  
AAGGAAAC -0.163140423866  
AAGGAAAG -0.297721604334  
AAGGAAAT 0.348061721276  
AAGGAACA -0.0470659763024  
AAGGAACC -0.132777419435  
AAGGAACG -0.100373969285  
AAGGAACT -0.167098897224  
AAGGAAGA -0.0305801669438  
AAGGAAGC -0.0142585489257  
AAGGAAGG -0.0811390481806  
AAGGAAGT -0.169727730759  
AAGGAATA 0.187210626605  
AAGGAATC 0.443221458373  
AAGGAATG -0.0477047947855  
AAGGAATT 0.141545126394  
AAGGACAA 0.117780645802  
AAGGACAC -0.172716070823  
AAGGACAG -0.00319742279403  
AAGGACAT -0.0270036644581  
AAGGACCA -0.329097995761  
AAGGACCC -0.245672579912

AAGGACCG -0.244743813454  
AAGGACCT -0.237289280348  
AAGGACGA -0.0652482983814  
AAGGACGC -0.338389616682  
AAGGACGG -0.189372738349  
AAGGACGT -0.238332492606  
AAGGACTA -0.130276288576  
AAGGACTC -0.168118000283  
AAGGACTG -0.138771025809  
AAGGACTT -0.0455455455455  
AAGGAGAA 0.0128516946699  
AAGGAGAC -0.345611321993  
AAGGAGAG -0.244067852683  
AAGGAGAT 0.212187324365  
AAGGAGCA -0.27272952792  
AAGGAGCC -0.226626516046  
AAGGAGCG -0.0637394801574  
AAGGAGCT -0.194599268811  
AAGGAGGA -0.257981817147  
AAGGAGGC -0.245270229845  
AAGGAGGG -0.202772746196  
AAGGAGGT -0.228255111616  
AAGGAGTA -0.0700292796705  
AAGGAGTC -0.188875313205  
AAGGAGTG -0.216727444122  
AAGGATAA 0.205694675392  
AAGGATAC 0.0269125493602  
AAGGATAG 0.0047261738794  
AAGGATAT 0.381953578923  
AAGGATCA 0.0172965729459  
AAGGATCC 0.182302652803  
AAGGATCG 0.210006350226  
AAGGATCT 0.331836547015  
AAGGATGA -0.0114895294264  
AAGGATGC -0.045335098096  
AAGGATGG -0.0750769576583  
AAGGATGT -0.057543769665  
AAGGATTA 0.30174940781  
AAGGATTC 0.37551463309  
AAGGATTG 0.22922928695  
AAGGCAAA 0.0397457183203  
AAGGCAAC -0.0376937351278  
AAGGCAAG -0.319160439349  
AAGGCAAT 0.101021875433  
AAGGCACA -0.281188757411  
AAGGCACC -0.356948588688  
AAGGCACG -0.279215871103  
AAGGCACT -0.276997692823  
AAGGCAGA -0.0963905914401  
AAGGCAGC -0.0867783917141  
AAGGCAGG -0.183453138226  
AAGGCAGT 0.0193097501055  
AAGGCATA -0.0905038575798  
AAGGCATC -0.287106645164



AAGGCATG -0.128572012442  
AAGGCATT -0.106070778558  
AAGGCCAA 0.042577012274  
AAGGCCAC -0.220617637188  
AAGGCCAG -0.251235593926  
AAGGCCAT 0.0665511700623  
AAGGCCCA -0.278464142279  
AAGGCCCC -0.4043349873  
AAGGCCCG -0.237287154423  
AAGGCCCT -0.238461991714  
AAGGCCGA -0.202209296099  
AAGGCCGC -0.280405694048  
AAGGCCGG -0.115421729265  
AAGGCCGT -0.250835945231  
AAGGCCTA -0.250692600954  
AAGGCCTC -0.259952089932  
AAGGCCTG -0.279228985499  
AAGGCCTT 0.113124622725  
AAGGCGAA -0.0104841311199  
AAGGCGAC -0.263619747083  
AAGGCGAG -0.238265754777  
AAGGCGAT 0.144243392478  
AAGGCGCA -0.141249128262  
AAGGCGCC -0.336567097754  
AAGGCGCG -0.0201783011142  
AAGGCGCT -0.126200223297  
AAGGCGGA -0.213458998812  
AAGGCGGC -0.111278705751  
AAGGCGGG 0.0690925084864  
AAGGCGGT -0.249168272239  
AAGGCGTA -0.157413150937  
AAGGCGTC -0.291127322454  
AAGGCGTG -0.19433621486  
AAGGCTAA -0.0300974755622  
AAGGCTAC -0.287593961646  
AAGGCTAG -0.198076774317  
AAGGCTAT -0.134994591896  
AAGGCTCA -0.343421440638  
AAGGCTCC -0.350128765384  
AAGGCTCG -0.283064065389  
AAGGCTCT -0.261141852008  
AAGGCTGA -0.126215243063  
AAGGCTGC -0.267407208498  
AAGGCTGG -0.308233630581  
AAGGCTGT -0.256041044642  
AAGGCTTA -0.167357443387  
AAGGCTTC -0.334093280125  
AAGGCTTG -0.199607418251  
AAGGAAA 0.161712517244  
AAGGGAAC -0.181965432344  
AAGGGAAG -0.167339477659  
AAGGGAAT 0.261660693561  
AAGGGACA -0.287962761033  
AAGGGACC -0.268790707788

AAGGGACG -0.222766222336  
AAGGGACT -0.300314857694  
AAGGGAGA -0.0364394126258  
AAGGGAGC -0.169210505192  
AAGGGAGG -0.173238454005  
AAGGGAGT -0.179395247666  
AAGGGATA 0.16347014299  
AAGGGATC 0.112251369827  
AAGGGATG 0.00829948963397  
AAGGGATT 0.316176787555  
AAGGGCAA -0.073217421258  
AAGGGCAC -0.191985983949  
AAGGGCAG -0.232353808787  
AAGGGCAT -0.268017962141  
AAGGGCCA -0.309672443808  
AAGGGCCC -0.275122473014  
AAGGGCCG -0.250747659172  
AAGGGCCT -0.1751272221  
AAGGGCGA -0.135863862502  
AAGGGCGC -0.175386939294  
AAGGGCGG -0.148589720951  
AAGGGCGT -0.235385329362  
AAGGGCTA -0.0879070126533  
AAGGGCTC -0.271891598378  
AAGGGCTG -0.256363332476  
AAGGGGAA 0.0827011087348  
AAGGGGAC -0.276071260204  
AAGGGGAG -0.0550978883899  
AAGGGGAT 0.219699568623  
AAGGGGCA -0.316034741648  
AAGGGGCC -0.396965824497  
AAGGGGCG -0.2391798069  
AAGGGGCT -0.305267896358  
AAGGGGGA -0.196697972081  
AAGGGGGC -0.212414571108  
AAGGGGGG -0.268656551876  
AAGGGGGT -0.318794404374  
AAGGGGTA -0.0539976783494  
AAGGGGTC -0.2882734271  
AAGGGGTG -0.273183408172  
AAGGGTAA -0.0766709956352  
AAGGGTAC -0.209288894402  
AAGGGTAG -0.224826108892  
AAGGGTAT 0.0815493091392  
AAGGGTCA -0.0999457027048  
AAGGGTCC -0.229089377706  
AAGGGTCG -0.10806986252  
AAGGGTCT -0.308864025404  
AAGGGTGA -0.0859631127765  
AAGGGTGC -0.175933048256  
AAGGGTGG -0.315090490565  
AAGGGTGT -0.204025389263  
AAGGGTTA -0.177197423609  
AAGGGTTC -0.127355633746

AAGGGTTG -0.303674664417  
AAGGTAAG 0.0460860309345  
AAGGTAAC -0.0131254222333  
AAGGTAAT 0.176343009676  
AAGGTACA -0.109871825623  
AAGGTACC -0.199786086233  
AAGGTACG -0.258172853126  
AAGGTAAG 0.0460860309345  
AAGGTAAT 0.176343009676  
AAGGTACT -0.0169480775541  
AAGGTAGA 0.14246667922  
AAGGTAGC -0.171795359505  
AAGGTAGG -0.0795589731463  
AAGGTAGT 0.00697138018875  
AAGGTATA -0.0929797157726  
AAGGTATC 0.147295314701  
AAGGTATG 0.130504441509  
AAGGTATT 0.0872236374386  
AAGGTCAA 0.0217090368606  
AAGGTCAC -0.273500587433  
AAGGTCAG -0.235408696617  
AAGGTCAT -0.281545753985  
AAGGTCCA -0.34024712507  
AAGGTCCC -0.277099459884  
AAGGTCCG -0.131808819515  
AAGGTCCT -0.21418230113  
AAGGTCGA -0.158798099854  
AAGGTCGC -0.170176042924  
AAGGTCGG -0.0246792565203  
AAGGTCGT -0.0765003818678  
AAGGTCTA -0.24045841634  
AAGGTCTC -0.237997767026  
AAGGTCTG -0.0462480935806  
AAGGTGAA -0.0296282025326  
AAGGTGAC 0.0282058918423  
AAGGTGAG -0.113202734415  
AAGGTGAT 0.0363284015678  
AAGGTGCA -0.214145323531  
AAGGTGCC -0.230790172235  
AAGGTGCG -0.18164309639  
AAGGTGCT -0.157243945195  
AAGGTGGA -0.0208472908034  
AAGGTGGC -0.277829345359  
AAGGTGGG -0.145529309603  
AAGGTGGT -0.193958565935  
AAGGTGTA -0.0895825092648  
AAGGTGTC -0.0651847532074  
AAGGTGTG -0.171446896256  
AAGGTTAA -0.14881679175  
AAGGTTAC -0.205241705338  
AAGGTTAG -0.218248737744  
AAGGTTAT -0.0975941137057  
AAGGTTCA -0.118219382057  
AAGGTTCC -0.125030102853  
AAGGTTCC -0.125030102853  
AAGGTTCC -0.125030102853  
AAGGTTCCG -0.0312916222007

AAGGTTCT -0.120073772083  
AAGGTTGA -0.118690049909  
AAGGTTGC -0.187835807523  
AAGGTTGG -0.221337259151  
AAGGTTGT -0.213769584288  
AAGGTTTA -0.0847317212032  
AAGGTTTC -0.128714688177  
AAGGTTTG -0.110571912454  
AAGTAAAA 0.311139747808  
AAGTAAAC -0.0702320387145  
AAGTAAAG -0.166710787923  
AAGTAAAT 0.113906264826  
AAGTAACA -0.216574886412  
AAGTAACC -0.0507022173689  
AAGTAACG 0.097214294184  
AAGTAACT -0.094410881645  
AAGTAAGA 0.0988525798705  
AAGTAAGC 0.0832250983766  
AAGTAAGG -0.100124954565  
AAGTAAGT -0.0377209165088  
AAGTAATA 0.168056486238  
AAGTAATC 0.310685160196  
AAGTAATG -0.137904733822  
AAGTAATT 0.249912446882  
AAGTACAA 0.108253833858  
AAGTACAC -0.306242109795  
AAGTACAG -0.0376789657825  
AAGTACAT 0.0573327266962  
AAGTACCA -0.297569332462  
AAGTACCC -0.161411243737  
AAGTACCG -0.0193788830152  
AAGTACCT -0.165449295925  
AAGTACGA 0.0246234210983  
AAGTACGC -0.0530068684627  
AAGTACGG -0.231415542487  
AAGTACGT -0.13206181388  
AAGTACTA 0.0753659996084  
AAGTACTC -0.0540219826151  
AAGTACTG -0.059687014153  
AAGTACTT 0.142404435294  
AAGTAGAA -0.0446450077736  
AAGTAGAC -0.0676758831556  
AAGTAGAG -0.0744501031262  
AAGTAGAT 0.166865689073  
AAGTAGCA -0.0571768507719  
AAGTAGCC -0.154751271554  
AAGTAGCG -0.0972940505019  
AAGTAGCT -0.271588012019  
AAGTAGGA -0.142069211447  
AAGTAGGC 0.041811784236  
AAGTAGGG -0.153860581477  
AAGTAGGT -0.177450615527  
AAGTAGTA 0.0780325978263  
AAGTAGTC -0.00605899140895

AAGTAGTG -0.167090438567  
AAGTATAA 0.245039805646  
AAGTATAC -0.097263601988  
AAGTATAG -0.0608445911476  
AAGTATAT 0.0888496662283  
AAGTATCA 0.181612811398  
AAGTATCC 0.143362370635  
AAGTATCG 0.279750808376  
AAGTATCT 0.268244490997  
AAGTATGA 0.0781511539087  
AAGTATGC -0.0256410443567  
AAGTATGG 0.0384001323572  
AAGTATGT 0.0779526082556  
AAGTATTA 0.139096954081  
AAGTATTC -0.0807157019278  
AAGTATTG 0.100164903195  
AAGTCAAA -0.143696853354  
AAGTCAAC -0.0927054123136  
AAGTCAAG -0.113128179675  
AAGTCAAT -0.215449575279  
AAGTCACA -0.189701321541  
AAGTCACC -0.284520937943  
AAGTCACG -0.032962457432  
AAGTCACT -0.230041052569  
AAGTCAGA -0.0202718188653  
AAGTCAGC -0.0284236764248  
AAGTCAGG -0.0456834790786  
AAGTCAGT 0.125228644628  
AAGTCATA 0.137488728398  
AAGTCATC -0.287624514418  
AAGTCATG -0.109615320066  
AAGTCATT 0.0756555453525  
AAGTCCAA -0.101032094188  
AAGTCCAC -0.230201656811  
AAGTCCAG -0.140275349051  
AAGTCCAT -0.32929566126  
AAGTCCCA -0.272312433484  
AAGTCCCC -0.261336491134  
AAGTCCCG -0.0590278095278  
AAGTCCCT -0.260319232519  
AAGTCCGA 0.0540250994796  
AAGTCCGC -0.109096899962  
AAGTCCGG -0.224251324572  
AAGTCCGT -0.253251606421  
AAGTCCTA -0.101830599737  
AAGTCCTC -0.269809360219  
AAGTCCTG -0.199185848711  
AAGTCGAA 0.0320014890185  
AAGTCGAC -0.217458781629  
AAGTCGAG -0.25299683847  
AAGTCGAT 0.0661970510455  
AAGTCGCA -0.136201362911  
AAGTCGCC -0.313023907318  
AAGTCGCG -0.0423473425037

AAGTCGCT -0.18400905404  
AAGTCGGA -0.199891919016  
AAGTCGGC -0.0449441892442  
AAGTCGGG -0.0629860053806  
AAGTCGGT -0.166528017981  
AAGTCGTA 0.0164418895583  
AAGTCGTC -0.197179910194  
AAGTCGTG -0.11974086178  
AAGTCTAA 0.107223199492  
AAGTCTAC -0.171445150836  
AAGTCTAG -0.0743887966859  
AAGTCTAT -0.0770541671593  
AAGTCTCA -0.132915436342  
AAGTCTCC -0.291041258342  
AAGTCTCG -0.102167835741  
AAGTCTCT -0.183096135013  
AAGTCTGA -0.217826298282  
AAGTCTGC -0.260260831452  
AAGTCTGG -0.171516451761  
AAGTCTGT 0.0493344584254  
AAGTCTTA 0.165196223788  
AAGTCTTC -0.193709501072  
AAGTCTTG -0.130745312146  
AAGTGAAA 0.149546360299  
AAGTGAAC -0.275699270853  
AAGTGAAG -0.253482473914  
AAGTGAAT 0.0747333999985  
AAGTGACA 0.0378688239819  
AAGTGACC 0.0753136056166  
AAGTGACG -0.013711378583  
AAGTGACT -0.204386109607  
AAGTGAGA 0.0635161273841  
AAGTGAGC 0.11064921671  
AAGTGAGG 0.0284915750552  
AAGTGAGT -0.0452105260853  
AAGTGATA 0.233772339833  
AAGTGATC 0.00583271899155  
AAGTGATG 0.272069224762  
AAGTGATT 0.31898427353  
AAGTGCAA 0.229454099545  
AAGTGCAC -0.08459029938  
AAGTGCAG -0.155315154372  
AAGTGCAT -0.0460556975708  
AAGTGCCA -0.197482757337  
AAGTGCCC -0.240348956851  
AAGTGCCG -0.0627714221902  
AAGTGCCT -0.230110464684  
AAGTGCGA -0.0510085342819  
AAGTGCGC -0.0151500111671  
AAGTGCGG -0.257608207299  
AAGTGCGT 0.00827411433472  
AAGTGCTA 0.00675334772504  
AAGTGCTC -0.180748994797  
AAGTGCTG -0.177190631608

AAGTGGAA 0.0495135143026  
AAGTGGAC -0.0257870265615  
AAGTGGAG -0.252273065568  
AAGTGGAT 0.0505340050795  
AAGTGGCA -0.148829411911  
AAGTGGCC -0.421475249822  
AAGTGGCG -0.134808969118  
AAGTGGCT -0.233203765731  
AAGTGGGA 0.0312277833332  
AAGTGGGC -0.204923568898  
AAGTGGGG -0.170237021965  
AAGTGGGT -0.236077117859  
AAGTGGTA -0.09867029564  
AAGTGGTC -0.261331946011  
AAGTGGTG -0.0696096551094  
AAGTGTA 0.112863951884  
AAGTGTAC -0.225730022081  
AAGTGTAG -0.0693324178173  
AAGTGTAT 0.0433275551939  
AAGTGTCA -0.111680551074  
AAGTGTCC -0.199313228609  
AAGTGTCCG -0.0290469532894  
AAGTGTCT -0.116091618432  
AAGTGTGA 0.0414903323285  
AAGTGTGC -0.21556780914  
AAGTGTGG 0.024135597737  
AAGTGTGT -0.168448128302  
AAGTGTTA 0.0271083755932  
AAGTGTTTC -0.00790497282811  
AAGTGTTG -0.0214387941661  
AAGTTAAA 0.246207017365  
AAGTTAAC -0.00443832262014  
AAGTTAAG -0.289312613923  
AAGTTAAT 0.0709845769801  
AAGTTACA -0.085577353941  
AAGTTACC -0.123549930375  
AAGTTACG 0.0258729804184  
AAGTTACT -0.0276543822641  
AAGTTAGA 0.0661091872418  
AAGTTAGC -0.0619376542444  
AAGTTAGG 0.0797391865399  
AAGTTAGT -0.0480549419943  
AAGTTATA 0.109532637971  
AAGTTATC -0.0627383345328  
AAGTTATG 0.0557527937344  
AAGTTATT 0.145249232883  
AAGTTCAA 0.111593294786  
AAGTTCAC -0.0219275390143  
AAGTTCAG -0.140108185901  
AAGTTCAT -0.176855642393  
AAGTTCBA -0.089941558925  
AAGTTCBC -0.206051658685  
AAGTTCBG -0.115493305191  
AAGTTCCT -0.121938813488

AAGTTCGA 0.0488069604315  
AAGTTCGC -0.12412422857  
AAGTTCGG -0.000530436508921  
AAGTTCGT 0.0328496540618  
AAGTTCTA -0.0660178084421  
AAGTTCTC -0.123529995607  
AAGTTCTG -0.0442191502798  
AAGTTGAA -0.0315825200908  
AAGTTGAC 0.0336672035237  
AAGTTGAG -0.0406071399896  
AAGTTGAT -0.105315212076  
AAGTTGCA -0.252310851976  
AAGTTGCC -0.169271445273  
AAGTTGCG -0.0831755509003  
AAGTTGCT -0.273684602218  
AAGTTGGA 0.0499602198492  
AAGTTGGC -0.141555687029  
AAGTTGGG -0.0208927936201  
AAGTTGGT -0.000459091247487  
AAGTTGTA 0.0530033253096  
AAGTTGTC -0.0114701478338  
AAGTTGTG -0.113157821753  
AAGTTTAA 0.0235428265731  
AAGTTTAC -0.223692141538  
AAGTTTAG -0.109737905172  
AAGTTTAT -0.0367181740546  
AAGTTTCA 0.0328569447384  
AAGTTTCC 0.0196601560238  
AAGTTTCG -0.0679392942658  
AAGTTTCT -0.222285222239  
AAGTTTGA 0.0997402361039  
AAGTTTGC -0.197707056547  
AAGTTTGG -0.0560437436246  
AAGTTTGT -0.112740354795  
AAGTTTTA 0.0687072545857  
AAGTTTTC -0.138583517383  
AAGTTTTG 0.0549930095385  
AATAAAAA 0.265620897445  
AATAAAAC -0.0389962965721  
AATAAAAG 0.0407877757649  
AATAAAAT 0.266005123975  
AATAAACA -0.0320775320775  
AATAAACC -0.145331281695  
AATAAACG 0.0867696327818  
AATAAACT 0.0534988284928  
AATAAAGA 0.195491614295  
AATAAAGC 0.13593789917  
AATAAAGG 0.221807551659  
AATAAAGT -0.0441204709423  
AATAAATA 0.250058598543  
AATAAATC 0.268816741239  
AATAAATG 0.0769736678828  
AATAAATT 0.337162689868  
AATAACAA 0.104963089812



AATAACAC 0.00909240538242  
AATAACAG 0.0239123420942  
AATAACAT -0.0268789734531  
AATAACCA 0.0469821828719  
AATAACCC -0.0406784194663  
AATAACCG 0.143447223783  
AATAACCT -0.0213232962457  
AATAACGA 0.0915295174971  
AATAACGC 0.0438297114513  
AATAACGG 0.00732688611476  
AATAACGT 0.0645671992584  
AATAACTA 0.0196747516478  
AATAACTC 0.0553936775107  
AATAACTG -0.0243259788714  
AATAAGAA 0.138911638912  
AATAAGAC -0.212830416169  
AATAAGAG 0.005172879426  
AATAAGAT 0.290713578592  
AATAAGCA 0.149848195303  
AATAAGCC -0.000321874785599  
AATAAGCG 0.0588476164756  
AATAAGCT 0.0709373285131  
AATAAGGA 0.0235316014978  
AATAAGGC 0.1786759211  
AATAAGGG -0.143053668206  
AATAAGGT -0.158756377598  
AATAAGTA 0.0973548024496  
AATAAGTC -0.0105822075519  
AATAAGTG 0.0182850010584  
AATAATAA 0.277552316373  
AATAATAC 0.0853236156266  
AATAATAG 0.161796783009  
AATAATAT 0.207883768969  
AATAATCA 0.220817792311  
AATAATCC 0.308226959742  
AATAATCG 0.227165098574  
AATAATCT 0.297240766938  
AATAATGA 0.187349554557  
AATAATGC 0.14186776308  
AATAATGG 0.242847530726  
AATAATGT 0.18018802508  
AATAATTA 0.129907313199  
AATAATTC -0.0098349037743  
AATAATTG 0.0145507762604  
AATACAAA 0.162162142435  
AATACAAC -0.112821856539  
AATACAAG -0.102090588492  
AATACAAT 0.182955847682  
AATACACA -0.0340571617653  
AATACACC 0.0203178896692  
AATACACG 0.161242454545  
AATACACT -0.091461500843  
AATACAGA 0.191986752593  
AATACAGC 0.135779029718

AATACAGG 0.18711050123  
AATACAGT 0.106811529675  
AATACATA 0.228274563331  
AATACATC -0.12150171894  
AATACATG 0.0819186441173  
AATACATT 0.122300241601  
AATACCAA -0.000246803277106  
AATACCAC 0.0919943358905  
AATACCAG 0.0463948797282  
AATACCAT 0.00417083750417  
AATACCCA 0.249556418592  
AATACCCC -0.149183618881  
AATACCCG -0.0547382174113  
AATACCCCT -0.0947299187882  
AATACCGA 0.032706259979  
AATACCGC 0.09644971278  
AATACCGG -0.0107421471058  
AATACCGT -0.135867272231  
AATACCTA 0.0689049931474  
AATACCTC -0.0256056031214  
AATACCTG 0.0434318956519  
AATACGAA 0.251976234097  
AATACGAC -0.102797061961  
AATACGAG 0.128314708437  
AATACGAT 0.312935483165  
AATACGCA 0.145893885535  
AATACGCC 0.0895184776976  
AATACGCG 0.112168642472  
AATACGCT 0.120306124683  
AATACGGA 0.162967375089  
AATACGGC 0.0887863163904  
AATACGGG 0.117222980519  
AATACGGT 0.0547404273271  
AATACGTA 0.204497151643  
AATACGTC 0.18155483307  
AATACGTG 0.254283208829  
AATACTAA 0.143858893601  
AATACTAC 0.0878863966482  
AATACTAG 0.0582578483683  
AATACTAT 0.0693627511809  
AATACTCA 0.238646086562  
AATACTCC -0.0556288674241  
AATACTCG 0.0704740553225  
AATACTCT 0.0773955773956  
AATACTGA 0.223919511798  
AATACTGC 0.120322182726  
AATACTGG 0.126139573586  
AATACTGT 0.260658361665  
AATACTTA 0.0951592300899  
AATACTTC 0.0912395219515  
AATACTTG 0.103325969868  
AATAGAAA 0.104911655955  
AATAGAAC -0.0499427019846  
AATAGAAG -0.141915176532

AATAGAAT 0.257027218382  
AATAGACA 0.0790311161069  
AATAGACC -0.254834004704  
AATAGACG 0.184809821683  
AATAGACT -0.0821245998461  
AATAGAGA 0.249680810287  
AATAGAGC 0.0476250603971  
AATAGAGG -0.0490752460449  
AATAGAGT 0.0257914060276  
AATAGATA 0.295362855969  
AATAGATC 0.286778514051  
AATAGATG 0.250739764823  
AATAGATT 0.42244586184  
AATAGCAA 0.218461639526  
AATAGCAC 0.00529317195984  
AATAGCAG -0.0763125890724  
AATAGCAT 0.0328306679416  
AATAGCCA -0.0737099405336  
AATAGCCC -0.000424057257218  
AATAGCCG -0.000329530632561  
AATAGCCT -0.222511696124  
AATAGCGA 0.0831396134426  
AATAGCGC 0.0583541966234  
AATAGCGG -0.0775590618025  
AATAGCGT 0.0133566418254  
AATAGCTA -0.164772586288  
AATAGCTC -0.108563487928  
AATAGCTG -0.236862634833  
AATAGGAA 0.12098786158  
AATAGGAC -0.207370928127  
AATAGGAG -0.107851629396  
AATAGGAT 0.111716531755  
AATAGGCA -0.198442395789  
AATAGGCC -0.329979904235  
AATAGGCG -0.0772284150006  
AATAGGCT -0.131870176919  
AATAGGGA 0.0868265658416  
AATAGGGC -0.0122205404332  
AATAGGGG -0.0618128117942  
AATAGGGT -0.167948686137  
AATAGGTA 0.0415442991201  
AATAGGTC -0.204797791837  
AATAGGTG -0.00221847191544  
AATAGTAA 0.224501360865  
AATAGTAC -0.105811834316  
AATAGTAG -0.0283987990372  
AATAGTAT -0.0163244600483  
AATAGTCA -0.175605858272  
AATAGTCC -0.0622154259396  
AATAGTCG 0.0366854457764  
AATAGTCT 0.0561787683  
AATAGTGA -0.175453822179  
AATAGTGC 0.0521685004748  
AATAGTGG 0.00905726663302

AATAGTGT -0.151458710702  
AATAGTTA 0.16168372229  
AATAGTTC 0.052447764569  
AATAGTTG 0.127990579064  
AATATAAA 0.329802254045  
AATATAAC 0.146053767266  
AATATAAG 0.195549544034  
AATATAAT 0.200415319373  
AATATAACA 0.202824036157  
AATATAACC 0.0288251653432  
AATATACG 0.287674722451  
AATATACT 0.180733998526  
AATATAGA 0.266410954505  
AATATAGC 0.270191893608  
AATATAGG 0.0658430837281  
AATATAGT 0.139308730218  
AATATATA 0.259954169045  
AATATATC 0.30673707875  
AATATATG 0.25635570024  
AATATATT 0.353599375963  
AATATCAA 0.28698533244  
AATATCAC 0.345737684576  
AATATCAG 0.305726881893  
AATATCAT 0.258393611819  
AATATCCA 0.375567688299  
AATATCCC 0.356887805377  
AATATCCG 0.435155541216  
AATATCCT 0.385220031678  
AATATCGA 0.289971789972  
AATATCGC 0.340190052311  
AATATCGG 0.387040203572  
AATATCGT 0.295986949191  
AATATCTA 0.389354919658  
AATATCTC 0.367001988214  
AATATCTG 0.399086775289  
AATATGAA 0.33888236024  
AATATGAC -0.0121844047211  
AATATGAG 0.143616563141  
AATATGAT 0.226817660927  
AATATGCA 0.152095209594  
AATATGCC -0.00173589567529  
AATATGCG 0.181503636228  
AATATGCT 0.144431143844  
AATATGGA 0.181879958833  
AATATGGC 0.134535073132  
AATATGGG 0.271906893119  
AATATGGT 0.152393013292  
AATATGTA 0.0726056635148  
AATATGTC 0.127302233363  
AATATGTG 0.235033539412  
AATATTAA 0.2635701408  
AATATTAC 0.176056728685  
AATATTAG 0.180140195292  
AATATTAT 0.150109851609

AATATTCA 0.0503076574966  
AATATTCC 0.327778191415  
AATATTCT 0.223090830001  
AATATTCT 0.270489497762  
AATATTGA 0.154456109002  
AATATTGC 0.23994438078  
AATATTGG 0.128028583316  
AATATTGT 0.0440391816238  
AATATTTA 0.201110194667  
AATATTTT 0.32355422874  
AATATTTG 0.253872158991  
AATCAAAA 0.329279650811  
AATCAAAC 0.215965208328  
AATCAAAG 0.203444491323  
AATCAAAT 0.28629081115  
AATCAACA 0.331142383743  
AATCAACC 0.00716407669905  
AATCAACG 0.253748458063  
AATCAACT 0.280915746371  
AATCAAGA 0.330854575691  
AATCAAGC 0.191369055005  
AATCAAGG 0.278460555376  
AATCAAGT 0.303392924605  
AATCAATA 0.295487690051  
AATCAATC 0.251993751962  
AATCAATG 0.114983745688  
AATCAATT 0.295536583415  
AATCACAA 0.309755990745  
AATCACAC 0.304255381269  
AATCACAG 0.311616023737  
AATCACAT 0.248980679255  
AATCACCA 0.254587810507  
AATCACCC 0.0412823291611  
AATCACCG 0.270207749013  
AATCACCT 0.159039204494  
AATCACGA 0.357821301834  
AATCACGC 0.255652066013  
AATCACGG 0.252725176968  
AATCACGT 0.263055066085  
AATCACTA 0.23544894757  
AATCACTC 0.190075750682  
AATCACTG 0.264548221572  
AATCAGAA 0.305399881754  
AATCAGAC 0.116211252575  
AATCAGAG 0.161490691794  
AATCAGAT 0.305462627804  
AATCAGCA 0.298401494858  
AATCAGCC 0.215048381715  
AATCAGCG 0.346782917162  
AATCAGCT 0.262737944556  
AATCAGGA 0.384611884612  
AATCAGGC 0.29190820639  
AATCAGGG 0.368196019711  
AATCAGGT 0.293173338628

AATCAGTA 0.21793556642  
AATCAGTC 0.0989589795766  
AATCAGTG 0.252022948403  
AATCATAA 0.287190061531  
AATCATAC 0.234907994715  
AATCATAG 0.312007036342  
AATCATAT 0.237310313068  
AATCATCA 0.232368732369  
AATCATCC 0.125260760713  
AATCATCG 0.255291957218  
AATCATCT 0.218955546179  
AATCATGA 0.284083560214  
AATCATGC 0.0514346401174  
AATCATGG 0.227457062984  
AATCATGT 0.349745061866  
AATCATTA 0.0905795602765  
AATCATTC 0.19170164157  
AATCATTG 0.196301833883  
AATCCAAA 0.412524094342  
AATCCAAC 0.358165620269  
AATCCAAG 0.390192185573  
AATCCAAT 0.3997219039  
AATCCACA 0.42318416385  
AATCCACC 0.371313766852  
AATCCACG 0.388510470574  
AATCCACT 0.332758378213  
AATCCAGA 0.363267227725  
AATCCAGC 0.35926439567  
AATCCAGG 0.418711269096  
AATCCAGT 0.404641504201  
AATCCATA 0.378075662577  
AATCCATC 0.407076487376  
AATCCATG 0.372245133318  
AATCCATT 0.407182664758  
AATCCCAA 0.360256951166  
AATCCCAC 0.291245008354  
AATCCCAG 0.330654345806  
AATCCCAT 0.32558630103  
AATCCCCA 0.348993087743  
AATCCCCC 0.144042224396  
AATCCCCG 0.334076626059  
AATCCCCT 0.263774515887  
AATCCCGA 0.315178815179  
AATCCCGC 0.284418026842  
AATCCCGG 0.307326846857  
AATCCCGT 0.385234915986  
AATCCCTA 0.272463376714  
AATCCCTC 0.309332748727  
AATCCCTG 0.31201495959  
AATCCGAA 0.409569863434  
AATCCGAC 0.341273548754  
AATCCGAG 0.369509426801  
AATCCGAT 0.438567768589  
AATCCGCA 0.414384356547

AATCCGCC 0.327405239301  
AATCCGCG 0.422246072909  
AATCCGCT 0.412944972008  
AATCCGGA 0.443472398018  
AATCCGGC 0.389680313923  
AATCCGGG 0.327753096225  
AATCCGGT 0.411026729209  
AATCCGTA 0.368005810092  
AATCCGTC 0.366011693175  
AATCCGTG 0.363681863682  
AATCCTAA 0.410098319015  
AATCCTAC 0.34412896068  
AATCCTAG 0.417760627342  
AATCCTAT 0.36563797873  
AATCCTCA 0.393011468769  
AATCCTCC 0.380414297497  
AATCCTCG 0.378117787209  
AATCCTCT 0.346686409006  
AATCCTGA 0.389111917257  
AATCCTGC 0.368797033642  
AATCCTGG 0.360585103009  
AATCCTGT 0.388530908082  
AATCCTTA 0.315829603708  
AATCCTTC 0.21036546645  
AATCCTTG 0.347756847757  
AATCGAAA 0.359693583352  
AATCGAAC 0.240095467368  
AATCGAAG 0.296019065276  
AATCGAAT 0.309388115589  
AATCGACA 0.266979100312  
AATCGACC 0.116448404327  
AATCGACG 0.22824536689  
AATCGACT 0.231871564856  
AATCGAGA 0.313881447852  
AATCGAGC 0.17032838697  
AATCGAGG 0.149198451498  
AATCGAGT 0.110738450983  
AATCGATA 0.316234680992  
AATCGATC 0.296949539577  
AATCGATG 0.323497728909  
AATCGATT 0.34227078906  
AATCGCAA 0.321981923611  
AATCGCAC 0.282644903857  
AATCGCAG 0.168111637809  
AATCGCAT 0.303577682366  
AATCGCCA 0.234158249994  
AATCGCCC 0.058089770211  
AATCGCCG 0.272305715933  
AATCGCCT 0.316502452866  
AATCGCGA 0.38909019212  
AATCGCGC 0.269794822011  
AATCGCGG 0.301072969205  
AATCGCGT 0.402478235812  
AATCGCTA 0.196400808741

AATCGCTC 0.135566696173  
AATCGCTG 0.238157558594  
AATCGGAA 0.27996453754  
AATCGGAC 0.21643268613  
AATCGGAG 0.0548595793878  
AATCGGAT 0.386385007597  
AATCGGCA 0.201169489048  
AATCGGCC 0.135343751597  
AATCGGCG 0.149059527847  
AATCGGCT 0.137167069334  
AATCGGGA 0.297666711516  
AATCGGGC 0.150632467902  
AATCGGGG 0.311362326514  
AATCGGGT 0.312887267433  
AATCGGTA 0.200762463707  
AATCGGTC 0.162366517522  
AATCGGTG 0.193606709342  
AATCGTAA 0.362780135507  
AATCGTAC 0.25520975521  
AATCGTAG 0.278588790026  
AATCGTAT 0.329824314673  
AATCGTCA 0.160760713269  
AATCGTCC 0.205126614218  
AATCGTCG 0.351877696109  
AATCGTCT 0.330712254955  
AATCGTGA 0.278749370452  
AATCGTGC 0.279399233945  
AATCGTGG 0.234960856173  
AATCGTGT 0.332946621337  
AATCGTTA 0.268497339748  
AATCGTTC 0.0495192161859  
AATCGTTG 0.262989131625  
AATCTAAA 0.427496478179  
AATCTAAC 0.393902166629  
AATCTAAG 0.383313504084  
AATCTAAT 0.420582760961  
AATCTACA 0.379380758169  
AATCTACC 0.398253364667  
AATCTACG 0.391056400225  
AATCTACT 0.413899695627  
AATCTAGA 0.439032696608  
AATCTAGC 0.408862030074  
AATCTAGG 0.435745663018  
AATCTAGT 0.397531139955  
AATCTATA 0.424445106263  
AATCTATC 0.342765630644  
AATCTATG 0.357016796411  
AATCTCAA 0.431175229739  
AATCTCAC 0.370032043094  
AATCTCAG 0.433116793063  
AATCTCAT 0.419440101258  
AATCTCCA 0.423905315942  
AATCTCCC 0.40217440494  
AATCTCCG 0.443411458143



AATCTCCT 0.402718145142  
AATCTCGA 0.439732706583  
AATCTCGC 0.390734381062  
AATCTCGG 0.422906377452  
AATCTCGT 0.458663678898  
AATCTCTA 0.375426390578  
AATCTCTC 0.386808318066  
AATCTCTG 0.371418874039  
AATCTGAA 0.460980264011  
AATCTGAC 0.394431171125  
AATCTGAG 0.446116915814  
AATCTGAT 0.39765247341  
AATCTGCA 0.407929023452  
AATCTGCC 0.245488784917  
AATCTGCG 0.440339788825  
AATCTGCT 0.398962796435  
AATCTGGA 0.457116896511  
AATCTGGC 0.431353450629  
AATCTGGG 0.397274685153  
AATCTGGT 0.449992335934  
AATCTGTA 0.407648695527  
AATCTGTC 0.397429983285  
AATCTGTG 0.417771143698  
AATCTTAA 0.402597753334  
AATCTTAC 0.345252966465  
AATCTTAG 0.408928211959  
AATCTTAT 0.404160358706  
AATCTTCA 0.395121016333  
AATCTTCC 0.391570257586  
AATCTTCG 0.414950767501  
AATCTTCT 0.428550469698  
AATCTTGA 0.37548301862  
AATCTTGC 0.34701648869  
AATCTTGG 0.372379436947  
AATCTTGT 0.417484978091  
AATCTTTA 0.344085166018  
AATCTTTC 0.366287775379  
AATCTTTG 0.366958723225  
AATGAAAA 0.148204678508  
AATGAAAC 0.106090377583  
AATGAAAG -0.0719738380452  
AATGAAAT 0.230516849996  
AATGAACA 0.0986336065634  
AATGAACC -0.133852482293  
AATGAACG -0.214626587312  
AATGAACT -0.2576406372  
AATGAAGA 0.105205756721  
AATGAAGC -0.121704649778  
AATGAAGG 0.138809608507  
AATGAAGT 0.149842135308  
AATGAATA -0.0687320715605  
AATGAATC 0.223643753947  
AATGAATG -0.012648000362  
AATGAATT 0.0593060005985

AATGACAA 0.118822945483  
AATGACAC -0.211141435444  
AATGACAG -0.101774425228  
AATGACAT -0.0828403273764  
AATGACCA -0.14838719566  
AATGACCC -0.183262329211  
AATGACCG 0.144486617081  
AATGACCT -0.270516478518  
AATGACGA 0.0427224221367  
AATGACGC -0.0833069348846  
AATGACGG -0.0569865257202  
AATGACGT 0.0980553556311  
AATGACTA 0.0542843118601  
AATGACTC 0.137434535481  
AATGACTG -0.0653504744414  
AATGAGAA 0.0987006290037  
AATGAGAC -0.168903267617  
AATGAGAG -0.134222237142  
AATGAGAT 0.268825500172  
AATGAGCA -0.0284838201355  
AATGAGCC -0.26932945117  
AATGAGCG -0.133396754491  
AATGAGCT -0.219888024684  
AATGAGGA -0.0625395064342  
AATGAGGC -0.209146703752  
AATGAGGG 0.0120077662533  
AATGAGGT -0.071563298836  
AATGAGTA 0.240431961344  
AATGAGTC 0.0337293216081  
AATGAGTG -0.15124288731  
AATGATAA 0.0559425706006  
AATGATAC 0.0196050044535  
AATGATAG 0.162941687408  
AATGATAT 0.196509181358  
AATGATCA 0.0722444207293  
AATGATCC 0.0645948979282  
AATGATCG 0.0578461785508  
AATGATCT 0.0826239462603  
AATGATGA 0.108830593679  
AATGATGC -0.0541975155451  
AATGATGG 0.0720569053902  
AATGATGT 0.0266147456625  
AATGATTA 0.151251802767  
AATGATTC 0.206476500515  
AATGATTG 0.00894068013109  
AATGCAAA 0.0329562126377  
AATGCAAC 0.01823724551  
AATGCAAG 0.0881970124394  
AATGCAAT 0.287251374058  
AATGCACA 0.0360925663956  
AATGCACC -0.166522180141  
AATGCACG -0.283905441575  
AATGCACT -0.0964774493989  
AATGCAGA 0.0601994116917

AATGCAGC 0.00447337723326  
AATGCAGG 0.287918455468  
AATGCAGT -0.0717568228433  
AATGCATA 0.208868648263  
AATGCATC 0.0382407684503  
AATGCATG -0.102628262926  
AATGCATT 0.00820702372388  
AATGCCAA -0.156150144004  
AATGCCAC -0.0879533179642  
AATGCCAG -0.110701347361  
AATGCCAT -0.203974838912  
AATGCCCA 0.0459661467267  
AATGCCCC -0.316339009864  
AATGCCCG -0.0793526259644  
AATGCCCT -0.280676652138  
AATGCCGA 0.00433491089168  
AATGCCGC -0.275899140761  
AATGCCGG -0.105241607381  
AATGCCGT 0.00113198598047  
AATGCCTA 0.079615044926  
AATGCCTC -0.128032447314  
AATGCCTG -0.164438985523  
AATGCGAA -0.0378670681701  
AATGCGAC -0.307023999515  
AATGCGAG -0.0554978200804  
AATGCGAT 0.143890984441  
AATGCGCA 0.0201856893645  
AATGCGCC -0.233283811453  
AATGCGCG -0.064057461583  
AATGCGCT -0.271459138205  
AATGCGGA -0.125559631501  
AATGCGGC -0.244822201303  
AATGCGGG -0.122716039291  
AATGCGGT -0.0591975936632  
AATGCGTA 0.157379765407  
AATGCGTC 0.0109304175821  
AATGCGTG -0.126388769271  
AATGCTAA 0.165209286421  
AATGCTAC -0.147291630481  
AATGCTAG 0.0311482281179  
AATGCTAT -0.0224381947841  
AATGCTCA -0.0845306335145  
AATGCTCC -0.148731696565  
AATGCTCG -0.149734677343  
AATGCTCT -0.269764864485  
AATGCTGA 0.0108924622089  
AATGCTGC -0.256897411937  
AATGCTGG -0.163045848748  
AATGCTGT -0.0736673312431  
AATGCTTA 0.0198666543005  
AATGCTTC -0.102103443427  
AATGCTTG -0.176163310946  
AATGAAA -0.0404903542258  
AATGGAAC -0.203770891533

AATGGAAG -0.18235873008  
AATGGAAT 0.108011503398  
AATGGACA 0.0562987671803  
AATGGACC -0.319701843904  
AATGGACG -0.208849434824  
AATGGACT -0.231352130771  
AATGGAGA -0.118339744385  
AATGGAGC -0.117606913717  
AATGGAGG -0.106699666739  
AATGGAGT 0.012284522713  
AATGGATA 0.36888170332  
AATGGATC 0.201577337723  
AATGGATG 0.159582447461  
AATGGCAA 0.0459702126369  
AATGGCAC -0.221083624875  
AATGGCAG 0.0128917785443  
AATGGCAT -0.18211186393  
AATGGCCA -0.247782165354  
AATGGCCC -0.310101178919  
AATGGCCG -0.167645964229  
AATGGCCT -0.0897722578771  
AATGGCGA 0.0199215183226  
AATGGCGC -0.0735305065226  
AATGGCGG -0.106968260665  
AATGGCGT -0.0590271442688  
AATGGCTA -0.0600343917004  
AATGGCTC -0.177582187552  
AATGGCTG -0.247578751676  
AATGGGAA 0.0582552249219  
AATGGGAC -0.128744207076  
AATGGGAG -0.164108233543  
AATGGGAT 0.165058813311  
AATGGGCA -0.0636592743325  
AATGGGCC -0.278236709583  
AATGGGCG -0.260028545618  
AATGGGCT -0.0666084933101  
AATGGGGA -0.0462432208133  
AATGGGGC -0.173423116052  
AATGGGGG -0.101695100788  
AATGGGGT 0.0895213973417  
AATGGGTA -0.0615934042674  
AATGGGTC -0.0711520805935  
AATGGGTG -0.00585296039841  
AATGGTAA 0.0994351618293  
AATGGTAC -0.0309579552004  
AATGGTAG -0.124672103747  
AATGGTAT 0.107526614884  
AATGGTCA -0.0417078458136  
AATGGTCC -0.0568543750362  
AATGGTCG 0.0694241083123  
AATGGTCT -0.131311752524  
AATGGTGA 0.00393767453131  
AATGGTGC -0.18069124471  
AATGGTGG -0.053841886674

AATGGTGT 0.0361146270237  
AATGGTTA -0.0929943139931  
AATGGTTC -0.0801084647781  
AATGGTTG 0.0362327832237  
AATGTAAA 0.221198805866  
AATGTAAAC 0.0360831514638  
AATGTAAAG -0.0313561511658  
AATGTAAT 0.33359943966  
AATGTACA 0.111319460158  
AATGTACC -0.00913247008027  
AATGTACG -0.062805543837  
AATGTACT -0.0160733706561  
AATGTAGA 0.209483733933  
AATGTAGC -0.170275296044  
AATGTAGG 0.0249680663927  
AATGTAGT 0.0642226248287  
AATGTATA 0.159925695058  
AATGTATC 0.197216914411  
AATGTATG 0.0312540601301  
AATGTCAA 0.06620803924  
AATGTCAC -0.0703203579484  
AATGTCAG -0.0880002744329  
AATGTCAT 0.0759070969249  
AATGTCCA -0.0380545835091  
AATGTCCC -0.11042733346  
AATGTCCG -0.227265209589  
AATGTCCT -0.231713140986  
AATGTCGA 0.0676006585097  
AATGTCGC -0.00110143573498  
AATGTCGG 0.0331956234535  
AATGTCGT 0.0428154909873  
AATGTCTA 0.00198462807384  
AATGTCTC 0.0309674747789  
AATGTCTG -0.185024787696  
AATGTGAA 0.224426472413  
AATGTGAC -0.230025412979  
AATGTGAG 0.0382410601285  
AATGTGAT 0.0418393600212  
AATGTGCA -0.016377013642  
AATGTGCC -0.140964973866  
AATGTGCG -0.0354851339912  
AATGTGCT -0.225322333206  
AATGTGGA 0.0123210164528  
AATGTGGC -0.0899315293255  
AATGTGGG -0.0127366084265  
AATGTGGT 0.0746848777152  
AATGTGTA 0.147193127158  
AATGTGTC 0.0140771936791  
AATGTGTG 0.0783000631485  
AATGTTAA 0.218760082396  
AATGTTAC 0.0377531878864  
AATGTTAG 0.0706781161327  
AATGTTAT 0.00597286190813  
AATGTTCA -0.122389290745

AATGTTCC -0.00233704779159  
AATGTTCCG -0.243685492356  
AATGTTCT -0.0701422596585  
AATGTTGA 0.125438110287  
AATGTTGC 0.129511053753  
AATGTTGG -0.0477485917066  
AATGTTGT 0.142121705364  
AATGTTTA 0.1097392158  
AATGTTTC 0.107180182938  
AATGTTTG 0.0459729702154  
AATTA AAA 0.105578579051  
AATTA AAC -0.0625393220047  
AATTA AAG -0.0665306599126  
AATTA AAT 0.0948001138661  
AATTA ACA 0.10489805089  
AATTA ACC -0.186142178877  
AATTA ACG -0.0821561949428  
AATTA ACT 0.056553798978  
AATTA AGA 0.152728772363  
AATTA AGC 0.0981606242199  
AATTA AGG 0.195815573283  
AATTA AGT 0.120001021875  
AATTA ATA 0.243729057559  
AATTA ATC 0.0581867136511  
AATTA ATG -0.0259115865176  
AATTA ATT 0.0991334044471  
AATTA CAA 0.191408217338  
AATTA CAC 0.196398878217  
AATTA CAG 0.0753961592082  
AATTA CAT 0.0891272453888  
AATTA CCA 0.196073808603  
AATTA CCC 0.165308564404  
AATTA CCG 0.187414144216  
AATTA CCT 0.180260149957  
AATTA CGA 0.180520864507  
AATTA CGC 0.0902486508547  
AATTA CGG 0.299973527246  
AATTA CGT 0.206439221591  
AATTA CTA 0.239968618756  
AATTA CTC 0.205256089283  
AATTA CTG -0.0429895695715  
AATTA GAA 0.168359819875  
AATTA GAC -0.0944087373474  
AATTA GAG -0.0151244863251  
AATTA GAT 0.228470179485  
AATTA GCA 0.0688503171463  
AATTA GCC -0.0750881367561  
AATTA GCG -0.0131566462048  
AATTA GCT -0.0455617760195  
AATTA GGA 0.0301720453236  
AATTA GGC 0.117310569842  
AATTA GGG 0.00843120223645  
AATTA GGT 0.0250401917069  
AATTA GTA 0.127707422465

AATTAGTC -0.0132454028836  
AATTAGTG 0.137187506843  
AATTATAA 0.310316562411  
AATTATAC -0.0835142296154  
AATTATAG 0.119765771281  
AATTATAT 0.137581658796  
AATTATCA 0.0437180207733  
AATTATCC 0.198210988081  
AATTATCG 0.116422998037  
AATTATCT 0.113509193229  
AATTATGA 0.0209456467358  
AATTATGC 0.111652975289  
AATTATGG 0.0673291825726  
AATTATGT 0.0907891362437  
AATTATTA 0.0881528911832  
AATTATTC 0.0125443581408  
AATTATTG -0.0468443650262  
AATTCAAA 0.0611479247843  
AATTCAAC 0.0574491069539  
AATTCAAG -0.0366931781522  
AATTCAAT 0.107138529813  
AATTCACA 0.0963446055926  
AATTCACC 0.00102406516646  
AATTCACG 0.0953418983722  
AATTCACT -0.132689048521  
AATTCAGA 0.126650246917  
AATTCAGC -0.00960050960051  
AATTCAGG 0.241885135825  
AATTCAGT 0.169196838474  
AATTCATA 0.226828757132  
AATTCATC -0.0109848140151  
AATTCATG 0.0283548010821  
AATTCCAA 0.0826211886818  
AATTCAC 0.0484011299023  
AATTCAG 0.0153098837252  
AATTCAT 0.149668985351  
AATTCACA 0.10564659168  
AATTCACC 0.196809558915  
AATTCACG 0.193947390917  
AATTCACT 0.235526959264  
AATTCAGA -0.00753049203302  
AATTCAGC 0.126265118282  
AATTCAGG 0.0282643445764  
AATTCAGT 0.153925826442  
AATTCATA 0.191878280038  
AATTCATC 0.122233089786  
AATTCATG -0.061103803528  
AATTCGAA 0.0297008094713  
AATTCGAC -0.0278293961454  
AATTCGAG 0.0189412268294  
AATTCGAT 0.14138518684  
AATTCGCA 0.215172472748  
AATTCGCC 0.0894338080188  
AATTCGCG 0.192408864183

AATTCGCT 0.064917983969  
AATTCGGA 0.143055991475  
AATTCGGC 0.164103705758  
AATTCGGG 0.228266336089  
AATTCGGT 0.0831478142814  
AATTCGTA 0.25366054062  
AATTCGTC -0.0424757122107  
AATTCGTG -0.0436990430866  
AATTCTAA 0.243973489632  
AATTCTAC 0.0986277672752  
AATTCTAG 0.115652211995  
AATTCTAT 0.139324887709  
AATTCTCA 0.180278074217  
AATTCTCC 0.114551506171  
AATTCTCG 0.0698103347352  
AATTCTCT 0.191475171849  
AATTCTGA 0.161470186784  
AATTCTGC 0.195863594228  
AATTCTGG 0.186388868207  
AATTCTGT 0.214943468391  
AATTCTTA 0.190741078663  
AATTCTTC 0.133884573279  
AATTCTTG 0.105232002219  
AATTGAAA 0.26289788411  
AATTGAAC -0.00878301934994  
AATTGAAG -0.0019042433461  
AATTGAAT 0.0648403224161  
AATTGACA 0.0638999881424  
AATTGACC 0.00295103026941  
AATTGACG 0.0114033999255  
AATTGACT -0.196269000334  
AATTGAGA 0.0803332773735  
AATTGAGC -0.0489945488084  
AATTGAGG 0.150849196304  
AATTGAGT -0.0164089709544  
AATTGATA 0.235959099595  
AATTGATC 0.202952453036  
AATTGATG -0.134157808385  
AATTGCAA 0.196383290877  
AATTGCAC 0.188748421567  
AATTGCAG 0.0527893549776  
AATTGCAT 0.205984221136  
AATTGCCA 0.107419183336  
AATTGCCC 0.0803710046134  
AATTGCCG 0.0478026028627  
AATTGCCT -0.0904659022065  
AATTGCGA 0.271302983424  
AATTGCGC 0.217528663186  
AATTGCGG 0.157949096005  
AATTGCGT 0.242147105783  
AATTGCTA 0.189558462188  
AATTGCTC 0.0545955803111  
AATTGCTG -0.210841762538  
AATTGGAA 0.0841516447577



AATTGGAC 0.0248312529469  
AATTGGAG 0.0372783251571  
AATTGGAT 0.158918212112  
AATTGGCA -0.0594591872629  
AATTGGCC -0.223956075395  
AATTGGCG 0.168109598729  
AATTGGCT -0.150886986726  
AATTGGGA -0.0664590725256  
AATTGGGC -0.129814254163  
AATTGGGG 0.0896640442095  
AATTGGGT -0.0272352780604  
AATTGGTA 0.1041303011  
AATTGGTC 0.0851914166544  
AATTGGTG -0.011959703682  
AATTGTAA 0.1395575353  
AATTGTAC -0.0323095114706  
AATTGTAG 0.0304015240542  
AATTGTAT 0.0255490755677  
AATTGTCA 0.0507572826872  
AATTGTCC 0.166194170931  
AATTGTCCG 0.118836467321  
AATTGTCT 0.0794194287716  
AATTGTGA 0.0873752540419  
AATTGTGC 0.0626921687528  
AATTGTGG 0.220198827763  
AATTGTGT 0.11120624757  
AATTGTTA 0.190552761618  
AATTGTTTC 0.0801503983322  
AATTGTTG 0.0642664759166  
AATTTAAA 0.277295387692  
AATTTAAC -0.0175507105684  
AATTTAAG 0.0702400677357  
AATTTAAT 0.113085844836  
AATTTACA 0.0972307175755  
AATTTACC 0.156595989929  
AATTTACG 0.0910086358786  
AATTTACT 0.0694926388473  
AATTTAGA 0.213266985994  
AATTTAGC 0.0976672043678  
AATTTAGG 0.187376081315  
AATTTAGT 0.165292000905  
AATTTATA 0.337221058902  
AATTTATC 0.201834266403  
AATTTATG 0.116740841954  
AATTTCAA 0.213965387619  
AATTTCAC 0.218537550273  
AATTTCAG 0.0781346084376  
AATTTCAT 0.180269775114  
AATTTCCA 0.262020974142  
AATTTCCC 0.278279307752  
AATTTCCG 0.252951298406  
AATTTCCT 0.251677297132  
AATTTCGA 0.243702380066  
AATTTCGC 0.266308766961

AATTTCCG 0.311931125596  
AATTTCGT 0.272596287748  
AATTTCTA 0.139019184474  
AATTTCTC 0.215556593651  
AATTTCTG 0.0594928578206  
AATTTGAA 0.208301278074  
AATTTGAC 0.0651920030948  
AATTTGAG 0.143809705446  
AATTTGAT 0.168205805712  
AATTTGCA 0.156609777822  
AATTTGCC 0.149598913892  
AATTTGCG 0.177798595429  
AATTTGCT -0.0018517842675  
AATTTGGA 0.168313832544  
AATTTGGC 0.118930972314  
AATTTGGG 0.122506789423  
AATTTGGT 0.00655095143902  
AATTTGTA 0.201619672562  
AATTTGTC 0.12296300081  
AATTTGTG 0.0628576234637  
AATTTTAA 0.124466617519  
AATTTTAC 0.0269183886484  
AATTTTAG 0.213439851682  
AATTTTAT 0.146310222068  
AATTTTCA 0.2508375729  
AATTTTCC 0.193119398481  
AATTTTCG 0.188295876733  
AATTTTCT 0.205612285862  
AATTTTGA 0.108919398466  
AATTTTGC 0.0125041057495  
AATTTTGG 0.236747767051  
AATTTTGT 0.270857632082  
AATTTTTA 0.243749258901  
AATTTTTC 0.238330617118  
AATTTTTG 0.0330963555543  
ACAAAAAA 0.238317988932  
ACAAAAAC -0.0210455245506  
ACAAAAAG 0.118850255214  
ACAAAAAT 0.269612587794  
ACAAAACA 0.219156514821  
ACAAAACC 0.180576337744  
ACAAAACG -0.0461559035274  
ACAAAACT 0.0927550437998  
ACAAAAGA 0.163597481779  
ACAAAAGC 0.0282058918423  
ACAAAAGG -0.0325839580155  
ACAAAAGT -0.169343743883  
ACAAAATA 0.365162076743  
ACAAAATC 0.455459591823  
ACAAAATG -0.0492230097151  
ACAAACAA 0.0310963993489  
ACAAACAC -0.0110896019987  
ACAAACAG 0.215874834858  
ACAAACAT 0.206117384291

ACAAACCA 0.119476205343  
ACAAACCC -0.181105927893  
ACAAACCG -0.128589528568  
ACAAACCT 0.0589556433071  
ACAAACGA 0.00210265361781  
ACAAACGC 0.10561739524  
ACAAACGG -0.192161223634  
ACAAACGT -0.0669861243914  
ACAAACTA 0.0999332665999  
ACAAACTC -0.035350777775  
ACAAACTG -0.123931199731  
ACAAAGAA 0.169680745465  
ACAAAGAC 0.0640896687127  
ACAAAGAG 0.0378601742238  
ACAAAGAT 0.251988903504  
ACAAAGCA 0.00518011124072  
ACAAAGCC -0.132836435237  
ACAAAGCG -0.351816591828  
ACAAAGCT -0.16017844295  
ACAAAGGA 0.0545738576042  
ACAAAGGC -0.217444976551  
ACAAAGGG -0.150526172098  
ACAAAGGT -0.151116524623  
ACAAAGTA 0.00291338170126  
ACAAAGTC -0.0767296221842  
ACAAAGTG -0.0948237015171  
ACAAATAA 0.170557609952  
ACAAATAC 0.103849028091  
ACAAATAG 0.121894621895  
ACAAATAT 0.291087786399  
ACAAATCA 0.290832154469  
ACAAATCC 0.350917133201  
ACAAATCG 0.3235701266  
ACAAATCT 0.397448941609  
ACAAATGA 0.0657834330099  
ACAAATGC -0.114716935291  
ACAAATGG -0.237802978293  
ACAAATGT -0.0758540910056  
ACAAATTA 0.132221192237  
ACAAATTC 0.218133179565  
ACAAATTG 0.130089781053  
ACAACAAA 0.0366554017065  
ACAACAAC -0.235075604074  
ACAACAAG -0.0238338456153  
ACAACAAT 0.123278322373  
ACAACACA 0.08573461895  
ACAACACC 0.0442260388459  
ACAACACG -0.0644709093165  
ACAACACT -0.0586960128225  
ACAACAGA -0.0104034218229  
ACAACAGC -0.0769665865304  
ACAACAGG 0.0168748129603  
ACAACAGT -0.00970854652818  
ACAACATA 0.194129157746

ACAACATC 0.0742216045246  
ACAACATG 0.0338341095917  
ACAACCAA 0.0244491064349  
ACAACCAC -0.196974584191  
ACAACCAG 0.0962453376933  
ACAACCAT -0.0616224603442  
ACAACCCA 0.0252525252525  
ACAACCCC -0.233952011116  
ACAACCCG -0.235116929317  
ACAACCCCT -0.0786792620822  
ACAACCGA -0.0357009902464  
ACAACCGC -0.0497045547918  
ACAACCGG -0.12853773757  
ACAACCGT -0.0583002091821  
ACAACCTA -0.175938562319  
ACAACCTC -0.0350605090536  
ACAACCTG -0.192163803632  
ACAACGAA 0.154541871346  
ACAACGAC 0.0115639803508  
ACAACGAG 0.101218298188  
ACAACGAT 0.127522928589  
ACAACGCA -0.0182979122373  
ACAACGCC -0.109620639924  
ACAACGCG -0.143755246235  
ACAACGCT -0.129218392896  
ACAACGGA 0.0856876159906  
ACAACGGC -0.0468484191778  
ACAACGGG -0.101615804491  
ACAACGGT 0.00797202674712  
ACAACGTA 0.117182105501  
ACAACGTC -0.177942599585  
ACAACGTG -0.178894706513  
ACAACCTAA 0.0997927052692  
ACAACCTAC 0.150589331038  
ACAACCTAG -0.196193960479  
ACAACCTAT 0.0262121625758  
ACAACCTCA -0.109466133876  
ACAACCTCC 0.0305581063157  
ACAACCTCG 0.154854273264  
ACAACCTCT -0.101529233675  
ACAACCTGA -0.0258234410114  
ACAACCTGC -0.188530834738  
ACAACCTGG -0.181095652106  
ACAACCTGT -0.0958244746124  
ACAACCTTA -0.0485281344204  
ACAACCTTC 0.0879827449034  
ACAACCTTG 0.0349715859741  
ACAAGAAA 0.0502346663942  
ACAAGAAC -0.00576747546445  
ACAAGAAG -0.074142090968  
ACAAGAAT 0.25648416458  
ACAAGACA -0.0784267497792  
ACAAGACC -0.096438035832  
ACAAGACG -0.263265466953

ACAAGACT -0.0850090873922  
ACAAGAGA 0.244837704284  
ACAAGAGC -0.0579031116107  
ACAAGAGG -0.0660255614841  
ACAAGAGT 0.0617322248418  
ACAAGATA 0.316894520558  
ACAAGATC 0.293029349722  
ACAAGATG -0.0781381396285  
ACAAGCAA 0.0561552860832  
ACAAGCAC -0.0274687415604  
ACAAGCAG 0.0493470945892  
ACAAGCAT -0.112958413636  
ACAAGCCA -0.162403552733  
ACAAGCCC -0.144065025698  
ACAAGCCG -0.28319010867  
ACAAGCCT -0.134735992504  
ACAAGCGA 0.127424359006  
ACAAGCGC -0.117508166894  
ACAAGCGG -0.235339525318  
ACAAGCGT -0.276539439415  
ACAAGCTA 0.0378794772734  
ACAAGCTC -0.169387153328  
ACAAGCTG -0.333041160532  
ACAAGGAA 0.0325766537888  
ACAAGGAC -0.18220253702  
ACAAGGAG -0.299898842059  
ACAAGGAT 0.225452725453  
ACAAGGCA -0.0789233689853  
ACAAGGCC -0.203745915742  
ACAAGGCG -0.184435985644  
ACAAGGCT -0.264750031014  
ACAAGGGA -0.110605607176  
ACAAGGGC -0.263205142517  
ACAAGGGG -0.0363068108186  
ACAAGGGT -0.106853487853  
ACAAGGTA -0.103175112954  
ACAAGGTC -0.189909853186  
ACAAGGTG -0.164178287616  
ACAAGTAA 0.180044962519  
ACAAGTAC -0.00398312445713  
ACAAGTAG -0.0698729032062  
ACAAGTAT 0.226304817214  
ACAAGTCA -0.115312281979  
ACAAGTCC -0.113655977127  
ACAAGTCG -0.0931022597234  
ACAAGTCT -0.102795559221  
ACAAGTGA 0.0546086431735  
ACAAGTGC -0.139019152145  
ACAAGTGG -0.177081632946  
ACAAGTGT -0.281452555714  
ACAAGTTA 0.0275633760482  
ACAAGTTC -0.239415790794  
ACAAGTTG -0.101155537779  
ACAATAAA 0.170802106857

ACAATAAC -0.0830055587265  
ACAATAAG 0.172255352073  
ACAATAAT 0.203974365525  
ACAATACA 0.120706115924  
ACAATACC 0.11922804347  
ACAATACG 0.117240498383  
ACAATACT 0.0878771333317  
ACAATAGA 0.144112902637  
ACAATAGC 0.0941607118092  
ACAATAGG 0.0126809452285  
ACAATAGT 0.115503310146  
ACAATATA 0.232958854171  
ACAATATC 0.385047772677  
ACAATATG 0.00394195848741  
ACAATCAA 0.226750509113  
ACAATCAC 0.152556513361  
ACAATCAG 0.288562667351  
ACAATCAT 0.23236597479  
ACAATCCA 0.333775902717  
ACAATCCC 0.274046774047  
ACAATCCG 0.34734321098  
ACAATCCT 0.326007826008  
ACAATCGA 0.225745028775  
ACAATCGC 0.200716042714  
ACAATCGG 0.0761932220462  
ACAATCGT 0.0701524784129  
ACAATCTA 0.382560235907  
ACAATCTC 0.406615256719  
ACAATCTG 0.396017229351  
ACAATGAA -0.0792797303551  
ACAATGAC 0.0615920819252  
ACAATGAG -0.0545924452119  
ACAATGAT 0.0619190820639  
ACAATGCA 0.0702755096694  
ACAATGCC -0.232842711537  
ACAATGCG 0.00436997729977  
ACAATGCT -0.00506429294308  
ACAATGGA 0.135608730178  
ACAATGGC -0.0596005216821  
ACAATGGG 0.0124515555138  
ACAATGGT 0.152691258752  
ACAATGTA 0.123249125932  
ACAATGTC -0.0241257490712  
ACAATGTG -0.098579295549  
ACAATTAA 0.0748969000679  
ACAATTAC 0.223833784662  
ACAATTAG 0.0897802565948  
ACAATTAT 0.0325737392612  
ACAATTCA 0.181210135756  
ACAATTCC 0.147984350708  
ACAATTCCG 0.0010378444187  
ACAATTCT 0.148860243936  
ACAATTGA 0.152036816712  
ACAATTGC -0.023477588082

ACAATTGG -0.0269760118245  
ACAATTGT -0.0856299456751  
ACAATTTA 0.228753384962  
ACAATTTT 0.133035239096  
ACAATTTG 0.0104360558906  
ACACAAAA 0.147258829077  
ACACAAAC -0.0426391423447  
ACACAAAG -0.025464797696  
ACACAAAT 0.197664606756  
ACACAACA 0.0491800340285  
ACACAACC 0.0233523441389  
ACACAACG 0.138234475768  
ACACAACT 0.0072688297896  
ACACAAGA 0.0334700699985  
ACACAAGC -0.112041701478  
ACACAAGG -0.17113697078  
ACACAAGT 0.00838594775297  
ACACAATA 0.197936982139  
ACACAATC 0.404698086516  
ACACAATG 0.032834330099  
ACACACAA 0.0798398575214  
ACACACAC -0.044718101549  
ACACACAG 0.0532474623384  
ACACACAT 0.145625278279  
ACACACCA -0.0700231337872  
ACACACCC -0.081340463635  
ACACACCG -0.245322703804  
ACACACCT -0.226923872142  
ACACACGA -0.0893151047482  
ACACACGC 0.109753003692  
ACACACGG -0.0663711260463  
ACACACGT -0.0744487346992  
ACACACTA -0.0479363661182  
ACACACTC -0.0156529419064  
ACACACTG -0.229150209369  
ACACAGAA 0.00665313898236  
ACACAGAC -0.0326759266153  
ACACAGAG -0.0552208527624  
ACACAGAT 0.249705628494  
ACACAGCA 0.00506485259447  
ACACAGCC -0.123540431233  
ACACAGCG -0.117436145943  
ACACAGCT -0.118450650975  
ACACAGGA -0.0323036535158  
ACACAGGC -0.00561520550645  
ACACAGGG -0.0746297261449  
ACACAGGT -0.160932963597  
ACACAGTA 0.0433808464111  
ACACAGTC -0.0761675442195  
ACACAGTG -0.271409237622  
ACACATAA 0.166401465661  
ACACATAC 0.107842001781  
ACACATAG 0.0643246552337  
ACACATAT 0.172880155909

ACACATCA -0.00420944360338  
ACACATCC 0.0479267145934  
ACACATCG 0.136872185281  
ACACATCT 0.0316905469223  
ACACATGA 0.228350474077  
ACACATGC -0.0151726141212  
ACACATGG -0.292753781825  
ACACATGT -0.276483155962  
ACACATTA 0.193130807355  
ACACATTC 0.134845952278  
ACACATTG -0.128639157591  
ACACAAA 0.0198236534966  
ACACCAAC -0.234222200166  
ACACCAAG -0.213454738615  
ACACCAAT -0.0674211513616  
ACACCACA 0.179650810566  
ACACCACC -0.0346861017642  
ACACCACG -0.0899877869582  
ACACCACT -0.0794448442536  
ACACCAGA 0.0378033574034  
ACACCAGC -0.116383708251  
ACACCAGG -0.259630521025  
ACACCAGT -0.197279869693  
ACACCATA 0.178789515558  
ACACCATC -0.148281890706  
ACACCATG -0.0995459395082  
ACACCCAA -0.238298564842  
ACACCCAC -0.0969949507481  
ACACCCAG -0.0485268931967  
ACACCCAT 0.167983912761  
ACACCCCA -0.123357478862  
ACACCCCC -0.151941018833  
ACACCCCG -0.167108883002  
ACACCCCT -0.23846187526  
ACACCCGA -0.158557589434  
ACACCCGC -0.122137025733  
ACACCCGG -0.350096319997  
ACACCCGT -0.147441202011  
ACACCCTA 0.0653321460114  
ACACCCTC -0.0542944315088  
ACACCCTG -0.150360121719  
ACACCGAA 0.116177747933  
ACACCGAC -0.288622365908  
ACACCGAG -0.193616769075  
ACACCGAT 0.169835124381  
ACACCGCA -0.000499989051335  
ACACCGCC -0.0157960044671  
ACACCGCG -0.148483570288  
ACACCGCT -0.044450105029  
ACACCGGA 0.0909286657956  
ACACCGGC -0.129301526644  
ACACCGGG -0.0305619332172  
ACACCGGT -0.199337325046  
ACACCGTA 0.130270869981



ACACCGTC -0.257684769395  
ACACCGTG -0.224179811465  
ACACCTAA -0.123546881795  
ACACCTAC 0.0287314876317  
ACACCTAG -0.150003170586  
ACACCTAT -0.10513405968  
ACACCTCA 0.112037692605  
ACACCTCC -0.0149281512918  
ACACCTCG -0.0641745071276  
ACACCTCT -0.0843639271484  
ACACCTGA 0.0344600799146  
ACACCTGC -0.210389944675  
ACACCTGG -0.238358902259  
ACACCTGT -0.162310179003  
ACACCTTA -0.0432083447072  
ACACCTTC 0.00171917953639  
ACACCTTG -0.195868005027  
ACACGAAA 0.14114251993  
ACACGAAC -0.238164003041  
ACACGAAG 0.0843945023102  
ACACGAAT 0.232035064926  
ACACGACA -0.097578294548  
ACACGACC -0.176981743885  
ACACGACG -0.205891433124  
ACACGACT -0.24855549961  
ACACGAGA 0.291660036642  
ACACGAGC -0.00579827970989  
ACACGAGG -0.0130340211528  
ACACGAGT -0.0862429336887  
ACACGATA 0.218975496887  
ACACGATC 0.341750841751  
ACACGATG -0.00521521426538  
ACACGCAA 0.135527850676  
ACACGCAC -0.101092557212  
ACACGCAG -0.0359730527778  
ACACGCAT 0.152080179666  
ACACGCCA -0.28425827427  
ACACGCCC -0.138021156407  
ACACGCCG -0.0766344857254  
ACACGCCT -0.197914857365  
ACACGCGA 0.098124295094  
ACACGCGC -0.107345193493  
ACACGCGG -0.168264286916  
ACACGCGT -0.215512321016  
ACACGCTA 0.0204074598014  
ACACGCTC -0.0282885684901  
ACACGCTG -0.156759090072  
ACACGGAA 0.0264633998189  
ACACGGAC -0.212406950426  
ACACGGAG -0.169990102749  
ACACGGAT 0.157092354062  
ACACGGCA -0.159710677154  
ACACGGCC -0.0685539732707  
ACACGGCG -0.106510097774

ACACGGCT -0.169823148474  
ACACGGGA 0.015259682067  
ACACGGGC -0.203621873965  
ACACGGGG 0.0775820415766  
ACACGGGT -0.251337782961  
ACACGGTA -0.0252001780983  
ACACGGTC -0.213938171592  
ACACGGTG -0.251321044928  
ACACGTAA 0.170167949222  
ACACGTAC -0.0354638384941  
ACACGTAG 0.0154940646069  
ACACGTAT 0.23663642402  
ACACGTCA -0.034276297828  
ACACGTCC -0.12790106985  
ACACGTCCG -0.165128884999  
ACACGTCT -0.157708099492  
ACACGTGA -0.0609935548857  
ACACGTGC -0.232213745193  
ACACGTGG -0.084197662589  
ACACGTGT -0.193435082527  
ACACGTTA -0.106901645494  
ACACGTTC -0.109634720947  
ACACGTTG -0.27275254541  
ACACTAAA 0.0953336256367  
ACACTAAC -0.0463767502485  
ACACTAAG -0.074320270359  
ACACTAAT 0.202675126918  
ACACTACA -0.00417083750417  
ACACTACC -0.0528673636139  
ACACTACG -0.177265746278  
ACACTACT -0.0614595311565  
ACACTAGA -0.00192011812294  
ACACTAGC -0.0424457776013  
ACACTAGG -0.0691583395984  
ACACTAGT 0.0834602161996  
ACACTATA 0.103529849711  
ACACTATC -0.0320555024343  
ACACTATG 0.000945187862474  
ACACTCAA -0.0346145043115  
ACACTCAC -0.112401448655  
ACACTCAG -0.153117943373  
ACACTCAT -0.0422333817508  
ACACTCCA -0.114818307401  
ACACTCCC -0.0402480333524  
ACACTCCG -0.0476892449535  
ACACTCCT -0.0748101595652  
ACACTCGA -0.141119397212  
ACACTCGC -0.122821398072  
ACACTCGG -0.0836606659339  
ACACTCGT -0.210267594596  
ACACTCTA 0.209250162405  
ACACTCTC -0.180113574155  
ACACTCTG -0.0413708995844  
ACACTGAA 0.0761830032919

ACACTGAC -0.00835675131202  
ACACTGAG -0.198307380417  
ACACTGAT 0.217011777618  
ACACTGCA 0.0212646555285  
ACACTGCC -0.183773720401  
ACACTGCG -0.148875967929  
ACACTGCT -0.0072381683646  
ACACTGGA -0.164130362383  
ACACTGGC -0.136115793545  
ACACTGGG -0.0115158062232  
ACACTGGT -0.182299519644  
ACACTGTA 0.022068859806  
ACACTGTC -0.0341165376491  
ACACTGTG -0.172339382122  
ACACTTAA 0.0630120478605  
ACACTTAC 0.0904254659156  
ACACTTAG -0.117892702241  
ACACTTAT 0.0861867377019  
ACACTTCA 0.0507978261409  
ACACTTCC 0.0262147544214  
ACACTTCG 0.031705258978  
ACACTTCT -0.107294730772  
ACACTTGA -0.0190074805679  
ACACTTGC -0.214983996229  
ACACTTGG -0.141492473937  
ACACTTTA 0.0732823368831  
ACACTTTC -0.0762300453791  
ACACTTTG -0.0801263851199  
ACAGAAAA 0.179455194412  
ACAGAAAC -0.0261625261625  
ACAGAAAG 0.0163521966672  
ACAGAAAT 0.23179565411  
ACAGAACA -0.0344844926561  
ACAGAACC -0.223190687941  
ACAGAACG -0.093058989318  
ACAGAACT 0.000941713062925  
ACAGAAGA 0.16224075315  
ACAGAAGC -0.182934764926  
ACAGAAGG -0.305063069504  
ACAGAAGT -0.0759723867372  
ACAGAATA 0.235510707993  
ACAGAATC 0.453799529557  
ACAGAATG -0.143799364457  
ACAGACAA 0.281597024021  
ACAGACAC 0.0103853884905  
ACAGACAG -0.120011195769  
ACAGACAT 0.0243039182433  
ACAGACCA -0.204859818753  
ACAGACCC -0.134268850954  
ACAGACCG 0.0459398792732  
ACAGACCT -0.180325751439  
ACAGACGA -0.285574087235  
ACAGACGC -0.0156003883127  
ACAGACGG -0.0858277572379

ACAGACGT -0.00174968356787  
ACAGACTA 0.0804938577987  
ACAGACTC -0.415265290164  
ACAGACTG -0.237586199348  
ACAGAGAA 0.279753728021  
ACAGAGAC 0.00424151295957  
ACAGAGAG -0.0337563038881  
ACAGAGAT 0.263405278557  
ACAGAGCA -0.170385163501  
ACAGAGCC -0.216191465794  
ACAGAGCG -0.220334641561  
ACAGAGCT -0.177614131775  
ACAGAGGA -0.0613062001075  
ACAGAGGC -0.281453609947  
ACAGAGGG -0.239438366699  
ACAGAGGT -0.269299790772  
ACAGAGTA 0.0203813055189  
ACAGAGTC -0.257474617604  
ACAGAGTG -0.287457651414  
ACAGATAA 0.223026056359  
ACAGATAC 0.281315751013  
ACAGATAG -0.0436172119508  
ACAGATAT 0.424136120251  
ACAGATCA 0.116385042663  
ACAGATCC 0.269243009277  
ACAGATCG 0.343162558484  
ACAGATCT 0.359503806486  
ACAGATGA 0.0498328606754  
ACAGATGC -0.243121555263  
ACAGATGG -0.0873431438238  
ACAGATGT -0.193892431147  
ACAGATTA 0.353591527193  
ACAGATTC 0.409139954202  
ACAGATTG 0.401154598124  
ACAGCAAA 0.147694526482  
ACAGCAAC -0.0250815553846  
ACAGCAAG 0.0575161938798  
ACAGCAAT 0.132632862054  
ACAGCACA -0.244722958033  
ACAGCACC -0.237998722179  
ACAGCACG -0.0927386216168  
ACAGCACT -0.0250512220209  
ACAGCAGA 0.0807507864791  
ACAGCAGC -0.0585592763207  
ACAGCAGG -0.203363325233  
ACAGCAGT -0.288794065841  
ACAGCATA 0.277143534719  
ACAGCATC 0.165335795567  
ACAGCATG -0.188030900805  
ACAGCCAA 0.0416876932028  
ACAGCCAC -0.208433109048  
ACAGCCAG -0.251313878733  
ACAGCCAT -0.290246621883  
ACAGCCCA -0.30063813162

ACAGCCCC -0.251592057276  
ACAGCCCG -0.24923714307  
ACAGCCCT -0.125187969925  
ACAGCCGA -0.00839178704116  
ACAGCCGC -0.311244523665  
ACAGCCGG -0.214437282095  
ACAGCCGT -0.217044653581  
ACAGCCTA -0.21507448723  
ACAGCCTC -0.176147516256  
ACAGCCTG -0.323898356941  
ACAGCGAA -0.00487653555032  
ACAGCGAC -0.201912819113  
ACAGCGAG -0.195181696953  
ACAGCGAT 0.0669029145347  
ACAGCGCA -0.103689551646  
ACAGCGCC 0.0339755096189  
ACAGCGCG 0.0247169770005  
ACAGCGCT -0.00636096085191  
ACAGCGGA -0.0565193146768  
ACAGCGGC -0.189671571182  
ACAGCGGG -0.033875678966  
ACAGCGGT -0.241785558459  
ACAGCGTA -0.10671881089  
ACAGCGTC -0.286587599096  
ACAGCGTG -0.234279214402  
ACAGCTAA -0.103963416859  
ACAGCTAC -0.133022907035  
ACAGCTAG -0.0272165192223  
ACAGCTAT -0.0180528893528  
ACAGCTCA -0.246160525989  
ACAGCTCC -0.0573689611332  
ACAGCTCG 0.144258884842  
ACAGCTCT -0.0409720955016  
ACAGCTGA -0.211676054824  
ACAGCTGC -0.263251017457  
ACAGCTGG -0.218167806756  
ACAGCTGT -0.195077620965  
ACAGCTTA -0.132931366953  
ACAGCTTC -0.194782967903  
ACAGCTTG -0.21928961645  
ACAGGAAA 0.179464588555  
ACAGGAAC -0.279968211387  
ACAGGAAG -0.109298543054  
ACAGGAAT 0.300500718962  
ACAGGACA -0.104379674528  
ACAGGACC -0.0832609468973  
ACAGGACG -0.0670441574233  
ACAGGACT -0.302515066022  
ACAGGAGA 0.133263505179  
ACAGGAGC 0.0226411100487  
ACAGGAGG 0.00315925327453  
ACAGGAGT -0.125717284457  
ACAGGATA 0.303887246597  
ACAGGATC 0.286463070152

ACAGGATG -0.205549076532  
ACAGGCAA 0.29841861677  
ACAGGCAC -0.0792026970818  
ACAGGCAG -0.0517229299224  
ACAGGCAT -0.01606427364  
ACAGGCCA -0.133634429721  
ACAGGCCC -0.0406731739074  
ACAGGCCG -0.239424913787  
ACAGGCCT 0.0147351207957  
ACAGGCCG 0.00932906350302  
ACAGGCGC -0.174560250081  
ACAGGCGG -0.138969536051  
ACAGGCGT -0.247818067467  
ACAGGCTA -0.0599937343358  
ACAGGCTC -0.281379383817  
ACAGGCTG -0.309827628507  
ACAGGGAA 0.0822709762104  
ACAGGGAC -0.0990705586849  
ACAGGGAG -0.285481548063  
ACAGGGAT 0.0349649277753  
ACAGGGCA -0.178382886049  
ACAGGGCC -0.304722692828  
ACAGGGCG -0.0619844602771  
ACAGGGCT -0.14567395829  
ACAGGGGA -0.0207360422764  
ACAGGGGC -0.270097127053  
ACAGGGGG -0.15804818739  
ACAGGGGT -0.124589668626  
ACAGGGTA -0.04895895518  
ACAGGGTC -0.263583724775  
ACAGGGTG -0.272534425009  
ACAGGTAA 0.067309601211  
ACAGGTAC -0.0421750699701  
ACAGGTAG -0.0770901059632  
ACAGGTAT 0.194500120435  
ACAGGTCA -0.180585126953  
ACAGGTCC -0.265972549571  
ACAGGTCC -0.195171503158  
ACAGGTCT -0.253986545364  
ACAGGTGA -0.154417056036  
ACAGGTGC -0.376208680173  
ACAGGTGG -0.265358163806  
ACAGGTTA -0.110181439102  
ACAGGTTC -0.0734370871851  
ACAGGTTG -0.239687603525  
ACAGTAAA 0.128703811351  
ACAGTAAC -0.0468140316625  
ACAGTAAG -0.0751127104273  
ACAGTAAT 0.196550545035  
ACAGTACA 0.0288585196095  
ACAGTACC -0.157930118319  
ACAGTACG -0.0694027402095  
ACAGTACT 0.0206469931315  
ACAGTAGA 0.00946475624621

ACAGTAGC -0.0467986472771  
ACAGTAGG -0.00232578659012  
ACAGTAGT -0.0740253863054  
ACAGTATA 0.287984204725  
ACAGTATC 0.32732319096  
ACAGTATG -0.0144651606928  
ACAGTCAA 0.107523922834  
ACAGTCAC -0.161345596608  
ACAGTCAG -0.312064346489  
ACAGTCAT -0.00888228724918  
ACAGTCCA -0.153820836575  
ACAGTCCC -0.0935088459343  
ACAGTCCG -0.046827384148  
ACAGTCCT -0.208653192014  
ACAGTCGA -0.0290249118632  
ACAGTCGC -0.204641750505  
ACAGTCGG -0.144900502657  
ACAGTCGT -0.228946287428  
ACAGTCTA 0.102344474209  
ACAGTCTC -0.232028090027  
ACAGTCTG -0.0776818283332  
ACAGTGAA -0.158905624068  
ACAGTGAC -0.121938600524  
ACAGTGAG -0.189216148414  
ACAGTGAT 0.186920724364  
ACAGTGCA 0.101711065105  
ACAGTGCC -0.185585644753  
ACAGTGCG 0.17144077137  
ACAGTGCT -0.118584785744  
ACAGTGGA -0.0410760448004  
ACAGTGGC 0.00297774138316  
ACAGTGGG -0.124209845713  
ACAGTGGT -0.124524020261  
ACAGTGTA -0.0447712499398  
ACAGTGTC -0.278078564164  
ACAGTGTG -0.0882674849129  
ACAGTTAA 0.152451406174  
ACAGTTAC 0.0449004766319  
ACAGTTAG -0.0923853248956  
ACAGTTAT 0.0730756117665  
ACAGTTCA -0.225400571228  
ACAGTTCC -0.025009596901  
ACAGTTCG -0.0227728235498  
ACAGTTCT -0.0778053832646  
ACAGTTGA -0.043384487825  
ACAGTTGC -0.205282455405  
ACAGTTGG -0.0555169532885  
ACAGTTTA -0.0770764143851  
ACAGTTTC -0.106243089505  
ACAGTTTG -0.0616563951965  
ACATAAAA 0.171414494573  
ACATAAAC -0.0909432640161  
ACATAAAG -0.0534841303323  
ACATAAAT 0.197091030424

ACATAACA -0.192011812294  
ACATAACC -0.106030272697  
ACATAACG -0.0324776037918  
ACATAACT 0.0945957387794  
ACATAAGA -0.0915228133691  
ACATAAGC -0.136782186384  
ACATAAGG -0.146953894169  
ACATAAGT -0.0399881754414  
ACATAATA 0.110177670784  
ACATAATC 0.342332690818  
ACATAATG 0.0419020021459  
ACATACAA 0.109435882163  
ACATACAC 0.227016196726  
ACATACAG -0.00750129559207  
ACATACAT 0.0170412326737  
ACATACCA -0.269588750432  
ACATACCC -0.21751711512  
ACATACCG -0.028096595595  
ACATACCT 0.119140382659  
ACATACGA 0.0656033364037  
ACATACGC 0.0676585676586  
ACATACGG 0.0427907246089  
ACATACGT -0.0800221469515  
ACATACTA -0.0214420355075  
ACATACTC -0.15121703099  
ACATACTG 0.0657146193879  
ACATAGAA 0.00661649750602  
ACATAGAC 0.119074034875  
ACATAGAG 0.0347033569861  
ACATAGAT 0.233579556652  
ACATAGCA -0.0378101209463  
ACATAGCC -0.199455713404  
ACATAGCG -0.0265391311617  
ACATAGCT 0.0309416582119  
ACATAGGA 0.131248950753  
ACATAGGC -0.15018513464  
ACATAGGG -0.00608028516253  
ACATAGGT -0.0447348174621  
ACATAGTA 0.0154943296027  
ACATAGTC -0.0824339613001  
ACATAGTG -0.0497845166307  
ACATATAA 0.160550498894  
ACATATAC 0.0289008016281  
ACATATAG -0.0635351050707  
ACATATAT 0.271707571283  
ACATATCA 0.255879798253  
ACATATCC 0.194673879108  
ACATATCG 0.268572980694  
ACATATCT 0.352587169624  
ACATATGA 0.0506054611943  
ACATATGC -0.0821922307224  
ACATATGG -0.0491938132742  
ACATATGT -0.177224661226  
ACATATTA 0.160145296176



ACATATTC 0.132552130618  
ACATATTG -0.0727849061182  
ACATCAAA 0.027610254883  
ACATCAAC -0.155539126894  
ACATCAAG -0.105190833064  
ACATCAAT -0.0961388385631  
ACATCACA -0.0468738824347  
ACATCACC -0.0476860156732  
ACATCACG 0.000798318980137  
ACATCACT 0.0831069392641  
ACATCAGA 0.0382845631118  
ACATCAGC 0.00101892526135  
ACATCAGG 0.0111961051948  
ACATCAGT -0.0464610264009  
ACATCATA 0.192905026238  
ACATCATC -0.194655418809  
ACATCATG -0.0332903193786  
ACATCCAA 0.0658385658386  
ACATCCAC -0.0055830894214  
ACATCCAG 0.0743319076652  
ACATCCAT 0.0615044926024  
ACATCCCA 0.000998094796948  
ACATCCCC -0.179554003185  
ACATCCCG -0.0702967962876  
ACATCCCT 0.0293168762728  
ACATCCGA 0.045239155347  
ACATCCGC 0.0769819406183  
ACATCCGG 0.0263886476008  
ACATCCGT 0.0305329080385  
ACATCCTA -0.00523612179567  
ACATCCTC -0.233628306386  
ACATCCTG -0.263057906158  
ACATCGAA 0.0586023663715  
ACATCGAC -0.168491821267  
ACATCGAG -0.104991749175  
ACATCGAT 0.276831928347  
ACATCGCA -0.158044276925  
ACATCGCC -0.171683333747  
ACATCGCG 0.153152445161  
ACATCGCT 0.00163386527023  
ACATCGGA 0.0788734553258  
ACATCGGC -0.123332940476  
ACATCGGG -0.0930962602675  
ACATCGGT -0.268591805959  
ACATCGTA 0.0892060757794  
ACATCGTC -0.118707619541  
ACATCGTG -0.179260031266  
ACATCTAA 0.15427410882  
ACATCTAC 0.045173272446  
ACATCTAG 0.12858769516  
ACATCTAT 0.146234024072  
ACATCTCA 0.142548884973  
ACATCTCC 0.13151232677  
ACATCTCG 0.0933261084776

ACATCTCT 0.146384385743  
ACATCTGA -0.00800111406172  
ACATCTGC -0.13225165139  
ACATCTGG -0.00384882082874  
ACATCTTA -0.00742634465983  
ACATCTTC 0.210120588908  
ACATCTTG 0.0633953512741  
ACATGAAA 0.175457826973  
ACATGAAC -0.187268549942  
ACATGAAG 0.01578575821  
ACATGAAT 0.0423329665754  
ACATGACA 0.0308113518119  
ACATGACC -0.327164628348  
ACATGACG -0.236431584171  
ACATGACT 0.0476974956753  
ACATGAGA 0.191621351357  
ACATGAGC -0.00801214437578  
ACATGAGG -0.0546512493487  
ACATGAGT 0.0072152041849  
ACATGATA 0.155694261755  
ACATGATC 0.105664109545  
ACATGATG -0.060830803255  
ACATGCAA 0.189233082487  
ACATGCAC 0.0890951293037  
ACATGCAG -0.0399808763312  
ACATGCAT 0.00285880743904  
ACATGCCA -0.167250908104  
ACATGCCC -0.063942395422  
ACATGCCG 0.0190047232631  
ACATGCCT 0.0593858321131  
ACATGCGA 0.0543256755378  
ACATGCGC -0.223407686773  
ACATGCGG -0.0916801321884  
ACATGCGT -0.0953410798219  
ACATGCTA 0.0289531813948  
ACATGCTC -0.229842575877  
ACATGCTG -0.0755355181193  
ACATGGAA 0.078207776472  
ACATGGAC -0.0643292482646  
ACATGGAG -0.152491586757  
ACATGGAT 0.211267636475  
ACATGGCA -0.106351569284  
ACATGGCC -0.23061243554  
ACATGGCG -0.146411505681  
ACATGGCT -0.0523564298049  
ACATGGGA -0.0709170842352  
ACATGGGC -0.10313443328  
ACATGGGG -0.126396659257  
ACATGGGT -0.248625826438  
ACATGGTA 0.0239228338066  
ACATGGTC -0.198309112815  
ACATGGTG -0.159099367324  
ACATGTAA 0.060911804851  
ACATGTAC 0.0684914509765

ACATGTAG 0.00229388263904  
ACATGTAT 0.155713564804  
ACATGTCA -0.165286841068  
ACATGTCC -0.0245851912519  
ACATGTCCG -0.0118853622961  
ACATGTCT -0.0600829189346  
ACATGTGA 0.18939187121  
ACATGTGC -0.170487507573  
ACATGTGG -0.168222226358  
ACATGTTA -0.16763720747  
ACATGTTC 0.0249242717313  
ACATGTTG -0.124956225614  
ACATTAAG 0.0742602106238  
ACATTAAC -0.00661080414297  
ACATTAAG 0.0579794670704  
ACATTAAT 0.175904907192  
ACATTACA 0.0522133703952  
ACATTACC -0.000660327694966  
ACATTACG 0.0599579373154  
ACATTACT 0.00940052407612  
ACATTAGA 0.198502604082  
ACATTAGC 0.00950753157803  
ACATTAGG -0.0736116969802  
ACATTAGT 0.0294026809178  
ACATTATA 0.272583403111  
ACATTATC 0.0739071407195  
ACATTATG 0.118309088122  
ACATTCAC -0.0117514208423  
ACATTCAC 0.0504234116674  
ACATTCAG 0.074839302112  
ACATTCAT -0.0269227681146  
ACATTCAC -0.0313399982192  
ACATTCAC 0.0143668386824  
ACATTCAG -0.0441888169161  
ACATTCCT 0.139016426895  
ACATTCGA -0.0510868946472  
ACATTCGC -0.00945161784778  
ACATTCGG -0.131444657071  
ACATTCGT -0.084909819493  
ACATTCTA 0.119109467594  
ACATTCTC 0.048807760929  
ACATTCTG 0.0524725827756  
ACATTGAA -0.00762056822663  
ACATTGAC -0.0633717387768  
ACATTGAG -0.130923035385  
ACATTGAT -0.0100005109377  
ACATTGCA -0.108716597447  
ACATTGCC -0.0669790707281  
ACATTGCG 0.0461883220623  
ACATTGCT 0.0173873230145  
ACATTGGA 0.0690483872302  
ACATTGGC -0.180161703371  
ACATTGGG -0.163915006574  
ACATTGGT -0.191024686763

ACATTGTA -0.013440365115  
ACATTGTC -0.0173686082777  
ACATTGTG -0.099908031211  
ACATTTAA 0.0705402372069  
ACATTTAC 0.116029252393  
ACATTTAG 0.0729845331854  
ACATTTAT 0.217974058962  
ACATTTCA 0.116187309229  
ACATTTCC 0.0414588141861  
ACATTTTCG 0.243749258901  
ACATTTCT 0.120720714145  
ACATTTGA 0.169051972082  
ACATTTGC -0.155069007357  
ACATTTGG -0.0638353309015  
ACATTTTA 0.0712909769958  
ACATTTTC 0.0746166142347  
ACATTTTG -0.199970353189  
ACCAAAAA 0.056366283639  
ACCAAAAC -0.0754968869295  
ACCAAAAG -0.173098673563  
ACCAAAAT 0.20847645672  
ACCAAACA -0.162788881835  
ACCAAACC -0.173856906586  
ACCAAACG -0.0611867916153  
ACCAAACCT -0.0968611298823  
ACCAAAGA 0.113665844142  
ACCAAAGC -0.123562400468  
ACCAAAGG -0.109955857741  
ACCAAAGT -0.251932247625  
ACCAAATA 0.0533908016613  
ACCAAATC 0.409372906172  
ACCAAATG 0.0743626051984  
ACCAACAA 0.128035749248  
ACCAACAC -0.156290928743  
ACCAACAG -0.226182304374  
ACCAACAT -0.0690130615561  
ACCAACCA -0.105384999324  
ACCAACCC -0.319204645768  
ACCAACCG -0.0741326532847  
ACCAACCT -0.0221633677168  
ACCAACGA 0.0672482688442  
ACCAACGC -0.190221571595  
ACCAACGG -0.202368496703  
ACCAACGT -0.252852737592  
ACCAACTA -0.0643870888637  
ACCAACTC -0.154395524992  
ACCAACTG 0.0745497563679  
ACCAAGAA 0.0877053787143  
ACCAAGAC -0.0137561804228  
ACCAAGAG -0.282854094822  
ACCAAGAT 0.334745224557  
ACCAAGCA -0.0106492396355  
ACCAAGCC -0.106357407124  
ACCAAGCG -0.358466872819

ACCAAGCT -0.0242708273011  
ACCAAGGA -0.25863105531  
ACCAAGGC 0.0339430523419  
ACCAAGGG -0.224283102983  
ACCAAGGT -0.131553482371  
ACCAAGTA -0.1606090065  
ACCAAGTC -0.185754020332  
ACCAAGTG -0.024339766764  
ACCAATAA 0.141396217154  
ACCAATAC 0.0598311755662  
ACCAATAG -0.0307787125969  
ACCAATAT 0.181872659723  
ACCAATCA 0.00874841783933  
ACCAATCC 0.161951207406  
ACCAATCG 0.137643152795  
ACCAATCT 0.1502131206  
ACCAATGA -0.0138913017701  
ACCAATGC -0.203206687903  
ACCAATGG -0.138817898861  
ACCAATTA 0.101252527317  
ACCAATTC -0.0178275414779  
ACCAATTG 0.109964745298  
ACCACAAA -0.14251776792  
ACCACAAC -0.0932732211055  
ACCACAAG -0.261257783235  
ACCACAAT 0.262837217383  
ACCACACA -0.0383619336803  
ACCACACC -0.0889128484163  
ACCACACG -0.175278939265  
ACCACACT -0.0878796652466  
ACCACAGA -0.00449114252973  
ACCACAGC -0.214611192431  
ACCACAGG 0.0573556783428  
ACCACAGT -0.0734863086031  
ACCACATA 0.094023775842  
ACCACATC 0.115187988584  
ACCACATG -0.152296307325  
ACCACCAA -0.0778083027637  
ACCACCAC -0.0251801606521  
ACCACCAG -0.193544079336  
ACCACCAT -0.0656675959706  
ACCACCCA -0.0703390807701  
ACCACCCC -0.178214556715  
ACCACCCG -0.128784572562  
ACCACCCCT -0.191103143646  
ACCACCGA -0.0616547137504  
ACCACCGC -0.230603555214  
ACCACCGG -0.225705720345  
ACCACCGT -0.181117009243  
ACCACCTA -0.274334442899  
ACCACCTC -0.27346271627  
ACCACCTG -0.286774372885  
ACCACGAA 0.0270366342343  
ACCACGAC -0.131874508247

ACCACGAG -0.110128036877  
ACCACGAT 0.150354199514  
ACCACGCA -0.0929938416221  
ACCACGCC -0.197641911284  
ACCACGCG -0.075666226287  
ACCACGCT -0.103799746333  
ACCACGGA -0.174385587672  
ACCACGGC -0.342187771355  
ACCACGGG -0.128691157861  
ACCACGGT -0.224723044749  
ACCACGTA -0.0527415863562  
ACCACGTC -0.204233893754  
ACCACGTG -0.0145227872501  
ACCACTAA 0.162558627193  
ACCACTAC -0.208241191213  
ACCACTAG -0.142084660023  
ACCACTAT -0.00207831848525  
ACCACTCA -0.0197850066287  
ACCACTCC -0.149600112481  
ACCACTCG 0.166604380926  
ACCACTCT 0.00472786836423  
ACCACTGA 0.0510197891765  
ACCACTGC -0.179221359271  
ACCACTGG -0.231809830142  
ACCACTTA -0.0649113227585  
ACCACTTC -0.240743038153  
ACCACTTG -0.0566515298146  
ACCAGAAA 0.157756780902  
ACCAGAAC -0.312754445299  
ACCAGAAG -0.31709959395  
ACCAGAAT 0.24523559372  
ACCAGACA -0.197710837219  
ACCAGACC -0.374361462308  
ACCAGACG -0.237743174401  
ACCAGACT -0.267169206118  
ACCAGAGA 0.112706291103  
ACCAGAGC -0.0877025383986  
ACCAGAGG 0.0259639805094  
ACCAGAGT -0.198653532822  
ACCAGATA 0.264519025131  
ACCAGATC 0.287721436757  
ACCAGATG -0.10825529368  
ACCAGCAA 0.167165049507  
ACCAGCAC -0.125049811483  
ACCAGCAG -0.275522325331  
ACCAGCAT 0.0379896790581  
ACCAGCCA -0.172670884506  
ACCAGCCC -0.240841347413  
ACCAGCCG -0.0929836897327  
ACCAGCCT -0.019611005928  
ACCAGCGA 0.0770453649242  
ACCAGCGC -0.227939169713  
ACCAGCGG -0.287480601244  
ACCAGCGT -0.186034683802

ACCAGCTA -0.167212504652  
ACCAGCTC -0.16678781987  
ACCAGCTG -0.221711979127  
ACCAGGAA -0.1597674035  
ACCAGGAC -0.277176348  
ACCAGGAG -0.296285730823  
ACCAGGAT 0.10402764903  
ACCAGGCA -0.333505732956  
ACCAGGCC -0.141372038209  
ACCAGGCG -0.274979390243  
ACCAGGCT -0.16828614005  
ACCAGGGA -0.241803392324  
ACCAGGGC -0.324761012539  
ACCAGGGG -0.16273342236  
ACCAGGGT -0.421813046773  
ACCAGGTA -0.159465463563  
ACCAGGTC -0.333187659506  
ACCAGGTG -0.253570335822  
ACCAGTAA 0.0512950967496  
ACCAGTAC -0.225325568763  
ACCAGTAG -0.0363848697182  
ACCAGTAT 0.102994178752  
ACCAGTCA -0.302797835179  
ACCAGTCC -0.319009913127  
ACCAGTCG -0.302200058992  
ACCAGTCT -0.199428799984  
ACCAGTGA -0.233254218319  
ACCAGTGC -0.172135262739  
ACCAGTGG -0.160012172499  
ACCAGTTA -0.0476865523488  
ACCAGTTC -0.337531250086  
ACCAGTTG -0.190735364263  
ACCATAAA 0.211653802563  
ACCATAAC -0.0044852014549  
ACCATAAG -0.201844919193  
ACCATAAT 0.114305765821  
ACCATACA -0.0583168592548  
ACCATACC -0.183443503695  
ACCATACG -0.168720380617  
ACCATACT 0.126672292685  
ACCATAGA 0.00798136337693  
ACCATAGC 0.065778851558  
ACCATAGG -0.0308553854059  
ACCATAGT 0.0668037183189  
ACCATATA 0.144147938366  
ACCATATC 0.30316128801  
ACCATATG -0.0633190514076  
ACCATCAA -0.0552024408225  
ACCATCAC -0.0760675065  
ACCATCAG -0.183383644158  
ACCATCAT 0.0662722714101  
ACCATCCA -0.00351452157982  
ACCATCCC -0.245495923932  
ACCATCCG -0.0216068709923

ACCATCCT -0.159262292144  
ACCATCGA -0.0735532095245  
ACCATCGC -0.325867118448  
ACCATCGG -0.285425023088  
ACCATCGT -0.0419454991135  
ACCATCTA -0.0572914512308  
ACCATCTC -0.167135361957  
ACCATCTG -0.0983722984168  
ACCATGAA 0.00854159945069  
ACCATGAC -0.234597156398  
ACCATGAG -0.25207294535  
ACCATGAT 0.191803980445  
ACCATGCA -0.127841606216  
ACCATGCC -0.101932124563  
ACCATGCG -0.0174733962613  
ACCATGCT 0.167433273494  
ACCATGGA -0.257206827259  
ACCATGGC -0.278092310027  
ACCATGGG -0.282420208924  
ACCATGGT -0.32541217838  
ACCATGTA 0.0588943307811  
ACCATGTC -0.275451352049  
ACCATGTG -0.0797948463416  
ACCATTAA 0.114169032795  
ACCATTAC 0.067462582839  
ACCATTAG 0.047453789878  
ACCATTAT 0.130971584564  
ACCATTCA -0.0548141281578  
ACCATTCC -0.090102163213  
ACCATTCT 0.0279053157841  
ACCATTGA -0.0495071400108  
ACCATTGC -0.221246063766  
ACCATTGG -0.102472831375  
ACCATTTA 0.054531135729  
ACCATTTTC -0.105477657829  
ACCATTTG -0.156979293343  
ACCCAAAA -0.0431822660818  
ACCCAAAC 0.0221184937556  
ACCCAAAG -0.314527323942  
ACCCAAAT 0.0630655402996  
ACCCAACA -0.167894863079  
ACCCAACC -0.166236919825  
ACCCAACG -0.0649570528464  
ACCCAACT -0.327711484339  
ACCCAAGA -0.0695608614269  
ACCCAAGC -0.246576626499  
ACCCAAGG -0.254937232814  
ACCCAAGT -0.187447370841  
ACCCAATA -0.1853038245  
ACCCAATC -0.0120768151071  
ACCCAATG -0.175545928652  
ACCCACAA -0.0015450682618  
ACCCACAC -0.0367196338766



ACCCACAG -0.367039009964  
ACCCACAT 0.0511505425266  
ACCCACCA -0.0972418699691  
ACCCACCC 0.00318760254236  
ACCCACCG 0.0261763140551  
ACCCACCT -0.140370030353  
ACCCACGA 0.0387108311497  
ACCCACGC -0.165384774428  
ACCCACGG -0.0594819575761  
ACCCACGT -0.275101011059  
ACCCACTA -0.163258202583  
ACCCACTC -0.258696423073  
ACCCACTG -0.18907604722  
ACCCAGAA 0.154833897258  
ACCCAGAC 0.00169833436241  
ACCCAGAG -0.00299581165402  
ACCCAGAT 0.190977478856  
ACCCAGCA -0.312334094123  
ACCCAGCC -0.218129815711  
ACCCAGCG -0.293711247988  
ACCCAGCT -0.0381173337303  
ACCCAGGA -0.066433933923  
ACCCAGGC -0.1779205616  
ACCCAGGG -0.212052174728  
ACCCAGGT -0.338183115839  
ACCCAGTA -0.0942707595929  
ACCCAGTC -0.23975407145  
ACCCAGTG -0.184394875485  
ACCCATAA 0.130556176011  
ACCCATAC -0.10908842727  
ACCCATAG -0.222894181863  
ACCCATAT 0.20729407093  
ACCCATCA 0.15961329314  
ACCCATCC -0.190585754212  
ACCCATCG 0.0730925600169  
ACCCATCT -0.023156765581  
ACCCATGA -0.186696738285  
ACCCATGC -0.305761673576  
ACCCATGG -0.238575224687  
ACCCATTA 0.0769552491551  
ACCCATTC -0.122297764875  
ACCCATTG -0.00669255417765  
ACCCCAAA -0.115783583221  
ACCCCAAC -0.125279521773  
ACCCCAAG -0.380889466043  
ACCCCAAT -0.0658270256856  
ACCCCACA -0.280270164179  
ACCCCACC -0.197574208702  
ACCCCACG -0.145259584654  
ACCCCACT -0.210937435388  
ACCCCAGA -0.240435064982  
ACCCCAGC -0.0930737183994  
ACCCCAGG -0.1237139058  
ACCCCAGT -0.0938795855306

ACCCATA -0.0284181618152  
ACCCATC -0.0278401617986  
ACCCATG -0.17120360464  
ACCCCAA -0.228094407089  
ACCCCAC -0.21700505865  
ACCCCAG -0.423697620711  
ACCCCAT -0.193121855308  
ACCCCCA -0.321914267251  
ACCCCCC -0.384741203738  
ACCCCCG -0.206855716064  
ACCCCCCT -0.351104496534  
ACCCCCGA -0.0894583821669  
ACCCCCGC -0.198846296985  
ACCCCCGG -0.341863381427  
ACCCCCGT -0.348593794457  
ACCCCCCTA -0.253680960454  
ACCCCCCTC -0.258896304199  
ACCCCCCTG -0.311602425776  
ACCCCGAA -0.0750906508941  
ACCCCGAC -0.215058470722  
ACCCCGAG -0.0517171335004  
ACCCCGAT 0.153338977979  
ACCCCGCA -0.0767584222841  
ACCCCGCC -0.193831846284  
ACCCCGCG -0.178793293132  
ACCCCGCT 0.00292441201532  
ACCCCGGA -0.108615874119  
ACCCCGGC -0.113154902399  
ACCCCGGG -0.245117499646  
ACCCCGGT -0.280947734308  
ACCCCGTA -0.147153693128  
ACCCCGTC -0.209967827043  
ACCCCGTG -0.1984049256  
ACCCCTAA -0.0407288383751  
ACCCCTAC -0.270043527048  
ACCCCTAG -0.242089080925  
ACCCCTAT -0.0156587339008  
ACCCCTCA -0.105228544746  
ACCCCTCC -0.105742661838  
ACCCCTCG -0.014296807832  
ACCCCTCT -0.184645752607  
ACCCCTGA -0.158256910863  
ACCCCTGC -0.14433812035  
ACCCCTGG -0.112350212122  
ACCCCTTA -0.0613696212654  
ACCCCTTC -0.211984905594  
ACCCCTTG -0.277268673458  
ACCCGAAA 0.116037605016  
ACCCGAAC -0.193856536734  
ACCCGAAG -0.239341894548  
ACCCGAAT 0.21202674394  
ACCCGACA -0.294519708298  
ACCCGACC -0.263393893047  
ACCCGACG -0.299079345588

ACCCGACT -0.13096035665  
ACCCGAGA -0.0577476128634  
ACCCGAGC -0.162035084237  
ACCCGAGG 0.0191492157106  
ACCCGAGT -0.184580566375  
ACCCGATA 0.0145696660848  
ACCCGATC 0.0456365456365  
ACCCGATG -0.192668138994  
ACCCGCAA 0.0937866240897  
ACCCGCAC -0.101340601589  
ACCCGCAG -0.0696145813113  
ACCCGCAT -0.128562446744  
ACCCGCCA -0.269820243879  
ACCCGCCC -0.100525775709  
ACCCGCCG -0.151737343159  
ACCCGCCT 0.0378489906979  
ACCCGCGA -0.0661379754244  
ACCCGCGC -0.162048177826  
ACCCGCGG -0.136978955581  
ACCCGCGT -0.209031864649  
ACCCGCTA -0.107150832444  
ACCCGCTC -0.195277510642  
ACCCGCTG -0.216543579551  
ACCCGGAA -0.0881739876774  
ACCCGGAC -0.29106828385  
ACCCGGAG -0.391359058567  
ACCCGGAT 0.160037447916  
ACCCGGCA -0.135506625547  
ACCCGGCC -0.315622045247  
ACCCGGCG -0.221072825449  
ACCCGGCT -0.135602954677  
ACCCGGGA -0.37036850606  
ACCCGGGC -0.145691377501  
ACCCGGGG -0.111151084095  
ACCCGGGT -0.299463170107  
ACCCGGTA -0.271200154378  
ACCCGGTC -0.257425720902  
ACCCGGTG -0.148694705634  
ACCCGTAA 0.166131696435  
ACCCGTAC -0.199164356317  
ACCCGTAG -0.0943160791646  
ACCCGTAT 0.0400509477895  
ACCCGTCA -0.350820110414  
ACCCGTCC -0.0865468639304  
ACCCGTCCG -0.175649560586  
ACCCGTCT -0.0781460481476  
ACCCGTGA -0.167536948041  
ACCCGTGC -0.175893529203  
ACCCGTGG -0.208245218445  
ACCCGTTA -0.155357019757  
ACCCGTTC -0.248255840254  
ACCCGTTG -0.294823576832  
ACCCTAAA -0.0900454734568  
ACCCTAAC -0.0122970501385

ACCCTAAG -0.284014013269  
ACCCTAAT -0.0266437236134  
ACCCTACA -0.0692342503449  
ACCCTACC -0.0982241081251  
ACCCTACG -0.0236831005136  
ACCCTACT -0.104086544426  
ACCCTAGA -0.056268354221  
ACCCTAGC -0.00420192395179  
ACCCTAGG 0.0436567082473  
ACCCTAGT -0.088683510455  
ACCCTATA -0.0451925754956  
ACCCTATC -0.177193786479  
ACCCTATG -0.105081701779  
ACCCTCAA -0.0633361213167  
ACCCTCAC -0.197274031564  
ACCCTCAG -0.222359012831  
ACCCTCAT -0.1810381945  
ACCCTCCA -0.298106882617  
ACCCTCCC -0.25651807199  
ACCCTCCG -0.00832463522697  
ACCCTCCT -0.137071244149  
ACCCTCGA -0.325335395183  
ACCCTCGC -0.283820501483  
ACCCTCGG -0.172531959297  
ACCCTCGT -0.169743078074  
ACCCTCTA -0.0743529937222  
ACCCTCTC -0.0362222802821  
ACCCTCTG -0.297528626692  
ACCCTGAA -0.0829631467924  
ACCCTGAC -0.162588388537  
ACCCTGAG -0.318483608252  
ACCCTGAT 0.152898077141  
ACCCTGCA -0.0821735557576  
ACCCTGCC -0.223552489737  
ACCCTGCG -0.127798383554  
ACCCTGCT -0.0844342948227  
ACCCTGGA -0.184247521232  
ACCCTGGC -0.166978149352  
ACCCTGGG -0.0426145996146  
ACCCTGTA -0.151216368174  
ACCCTGTC -0.313733848426  
ACCCTGTG -0.129488568538  
ACCCTTAA -0.130081318614  
ACCCTTAC -0.0681564384445  
ACCCTTAG -0.117005351132  
ACCCTTAT -0.158063253419  
ACCCTTCA -0.144617594592  
ACCCTTCC -0.34798121367  
ACCCTTCG -0.175153294985  
ACCCTTCT -0.204646190445  
ACCCTTGA -0.293095346159  
ACCCTTGC -0.171690475994  
ACCCTTGG -0.160029225982  
ACCCTTTA 0.0168198501532

ACCCTTTC -0.346399878733  
ACCCTTTG -0.215337151065  
ACCGAAAA -0.00529041438132  
ACCGAAAC -0.213908719241  
ACCGAAAG -0.126678247922  
ACCGAAAT 0.360268753239  
ACCGAACA -0.108388515816  
ACCGAACC -0.0190010947587  
ACCGAACG -0.0554538799414  
ACCGAACT -0.276228384648  
ACCGAAGA 0.0278474066353  
ACCGAAGC -0.0937051098594  
ACCGAAGG -0.0175368205671  
ACCGAAGT -0.140161849002  
ACCGAATA 0.16251541937  
ACCGAATC 0.350712971925  
ACCGAATG -0.0972949425268  
ACCGACAA 0.0356348083621  
ACCGACAC -0.0742454695086  
ACCGACAG -0.170413400679  
ACCGACAT 0.178652292286  
ACCGACCA -0.149651959365  
ACCGACCC -0.169475523801  
ACCGACCG -0.336179151681  
ACCGACCT -0.352232714177  
ACCGACGA -0.0790557901791  
ACCGACGC -0.250866268059  
ACCGACGG -0.205024147962  
ACCGACGT -0.101245564846  
ACCGACTA -0.0283520916865  
ACCGACTC -0.235795117782  
ACCGACTG -0.145733888158  
ACCGAGAA -0.0334552710828  
ACCGAGAC -0.166003607425  
ACCGAGAG -0.203796991768  
ACCGAGAT 0.300111406172  
ACCGAGCA -0.227312758937  
ACCGAGCC -0.350316912211  
ACCGAGCG -0.244211349031  
ACCGAGCT -0.214970602099  
ACCGAGGA -0.257441177687  
ACCGAGGC -0.239182543226  
ACCGAGGG -0.31936680182  
ACCGAGGT -0.322121312494  
ACCGAGTA 0.164015341026  
ACCGAGTC -0.280576570617  
ACCGAGTG -0.113176434904  
ACCGATAA 0.193422771764  
ACCGATAC 0.139885257987  
ACCGATAG 0.0825030399285  
ACCGATAT 0.370490325036  
ACCGATCA -0.0396024094891  
ACCGATCC 0.117904405783  
ACCGATCG 0.154042472224

ACCGATCT 0.0800763486931  
ACCGATGA -0.0528176970207  
ACCGATGC -0.145946715121  
ACCGATGG -0.235711706049  
ACCGATTA 0.179776990813  
ACCGATTC 0.143478188933  
ACCGATTG 0.119681320847  
ACCGCAAA -0.142002420793  
ACCGCAAC -0.198261864395  
ACCGCAAG -0.31947442567  
ACCGCAAT 0.304763399342  
ACCGCACA -0.0309153067883  
ACCGCACC -0.0465416855807  
ACCGCACG -0.0773043144456  
ACCGCACT 0.00271745874178  
ACCGCAGA 0.0162675269885  
ACCGCAGC -0.149744385159  
ACCGCAGG -0.128711043259  
ACCGCAGT -0.0980015092313  
ACCGCATA 0.053574087401  
ACCGCATC 0.12773517319  
ACCGCATG -0.22267635748  
ACCGCAA -0.0112630397436  
ACCGCCAC -0.176364766894  
ACCGCCAG -0.0832912865221  
ACCGCCAT -0.0416181908155  
ACCGCCCA -0.306100812401  
ACCGCCCC -0.173419738799  
ACCGCCCG -0.102762036663  
ACCGCCCT -0.285705425587  
ACCGCCGA -0.0118486456501  
ACCGCCGC -0.292323054405  
ACCGCCGG -0.213077586753  
ACCGCCGT -0.12202014187  
ACCGCCTA -0.108202298927  
ACCGCCTC -0.347055824273  
ACCGCCTG -0.24858915934  
ACCGCGAA -0.0621740520232  
ACCGCGAC -0.239605877829  
ACCGCGAG -0.169541014252  
ACCGCGAT 0.309906325058  
ACCGCGCA -0.0621333473462  
ACCGCGCC -0.112283023811  
ACCGCGCG -0.0530103651674  
ACCGCGCT -0.033854003197  
ACCGCGGA -0.177903119166  
ACCGCGGC -0.216815378975  
ACCGCGGG -0.092268181931  
ACCGCGGT -0.370481985818  
ACCGCGTA -0.0381031137919  
ACCGCGTC -0.375694323842  
ACCGCGTG -0.106143184303  
ACCGCTAA -0.057549284822  
ACCGCTAC -0.258028056791

ACCGCTAG -0.114003517298  
ACCGCTAT 0.134072246593  
ACCGCTCA -0.127511777682  
ACCGCTCC -0.0942146459007  
ACCGCTCG -0.111047702542  
ACCGCTCT -0.0998677663756  
ACCGCTGA -0.16426661787  
ACCGCTGC -0.213175954187  
ACCGCTGG -0.124787820495  
ACCGCTTA -0.205291596025  
ACCGCTTC -0.178819472315  
ACCGCTTG -0.189120456519  
ACCGGAAA 0.0771508653095  
ACCGGAAC -0.129618872336  
ACCGGAAG -0.301364594963  
ACCGGAAT 0.278953745538  
ACCGGACA -0.170652740219  
ACCGGACC -0.219430518765  
ACCGGACG -0.369002830628  
ACCGGACT -0.196289476949  
ACCGGAGA -0.038969256346  
ACCGGAGC -0.0933173855106  
ACCGGAGG -0.213658585006  
ACCGGAGT -0.104083795466  
ACCGGATA 0.315779216514  
ACCGGATC 0.170027663628  
ACCGGATG -0.0751149148278  
ACCGGCAA -0.000431109346699  
ACCGGCAC -0.227656974869  
ACCGGCAG -0.149804748801  
ACCGGCAT -0.00415538345876  
ACCGGCCA -0.265776233994  
ACCGGCCC -0.240236087985  
ACCGGCCG -0.144927176637  
ACCGGCCT -0.17779128723  
ACCGGCGA -0.150618976095  
ACCGGCGC -0.178881245046  
ACCGGCGG -0.240541784869  
ACCGGCGT -0.195571269073  
ACCGGCTA -0.276955089779  
ACCGGCTC -0.309000300442  
ACCGGCTG -0.297665619469  
ACCGGGAA -0.135616781825  
ACCGGGAC -0.273565870318  
ACCGGGAG -0.17455531567  
ACCGGGAT 0.196917585746  
ACCGGGCA -0.298010744241  
ACCGGGCC -0.293088526723  
ACCGGGCG -0.33062757062  
ACCGGGCT -0.232191368745  
ACCGGGGA 0.00722830886915  
ACCGGGGC -0.0897678030098  
ACCGGGGG -0.404851456692  
ACCGGGTA -0.194586119118

ACCGGGTC -0.238989649592  
ACCGGGTG -0.212587905489  
ACCGGTAA 0.126891354164  
ACCGGTAC -0.133535375698  
ACCGGTAG 0.124373188908  
ACCGGTAT 0.0420187879098  
ACCGGTCA 0.00777912899125  
ACCGGTCC -0.178927128017  
ACCGGTCCG -0.041717453788  
ACCGGTCT -0.110334080276  
ACCGGTGA -0.181084441616  
ACCGGTGC -0.207436523445  
ACCGGTGG -0.238366857895  
ACCGGTTA 0.0239593660646  
ACCGTTTC -0.282726069515  
ACCGTTTG -0.294382473317  
ACCGTAAA 0.0270848083619  
ACCGTAAC 0.112447157902  
ACCGTAAG 0.0148369013817  
ACCGTAAT 0.397657698141  
ACCGTACA -0.178273929854  
ACCGTACC -0.0983839256653  
ACCGTACG -0.125059260972  
ACCGTACT -0.0995264572315  
ACCGTAGA -0.0430030581546  
ACCGTAGC -0.0909627539026  
ACCGTAGG -0.0698977214129  
ACCGTAGT -0.125592140318  
ACCGTATA 0.129415414261  
ACCGTATC 0.237439919258  
ACCGTATG -0.114308523399  
ACCGTCAA -0.354590932108  
ACCGTCAC -0.317836221037  
ACCGTCAG -0.2062471998  
ACCGTCAT 0.0133566418254  
ACCGTCCA -0.043129712488  
ACCGTCCC 0.0508857470274  
ACCGTCCG 0.0371382193099  
ACCGTCCT -0.146186066537  
ACCGTCGA -0.254586991958  
ACCGTCGC -0.354853419055  
ACCGTCGG -0.172034437318  
ACCGTCGT -0.117206133349  
ACCGTCTA -0.132489785909  
ACCGTCTC -0.182501276388  
ACCGTCTG -0.258768120957  
ACCGTGAA 0.0369794822011  
ACCGTGAC -0.116068731311  
ACCGTGAG -0.25256710304  
ACCGTGAT 0.188380546411  
ACCGTGCA -0.0606562450277  
ACCGTGCC -0.0800279368341  
ACCGTGCG -0.0147799683219  
ACCGTGCT -0.00669806101461



ACCGTGGA -0.17026579218  
ACCGTGGC -0.289122177782  
ACCGTGGG -0.21629654169  
ACCGTGTA -0.126038231203  
ACCGTGTC -0.0957061997359  
ACCGTGTG -0.150877744416  
ACCGTTAA 0.0265155588645  
ACCGTTAC -0.13404271744  
ACCGTTAG -0.0555555555556  
ACCGTTAT 0.0482314270193  
ACCGTTCA -0.0735239371603  
ACCGTTCC -0.0279709203448  
ACCGTTCCG -0.062533298885  
ACCGTTCT 0.0162343726937  
ACCGTTGA -0.139658269838  
ACCGTTGC -0.114955827977  
ACCGTTGG -0.270740474281  
ACCGTTTA -0.00486485697393  
ACCGTTTC -0.322653547756  
ACCGTTTG 0.0434966647088  
ACCTAAAA -0.113738579284  
ACCTAAAC -0.0504428963501  
ACCTAAAG -0.124120052931  
ACCTAAAT 0.251955796588  
ACCTAACA -0.0775046748481  
ACCTAACC -0.123956595959  
ACCTAACG -0.0704368746269  
ACCTAACT -0.0268907030154  
ACCTAAGA -0.0552958694335  
ACCTAAGC -0.236593637678  
ACCTAAGG -0.130467933498  
ACCTAAGT -0.234950056381  
ACCTAATA 0.0539834894126  
ACCTAATC 0.0376754164633  
ACCTAATG 0.104031028273  
ACCTACAA -0.0890932936571  
ACCTACAC 0.170740056787  
ACCTACAG -0.0698783942967  
ACCTACAT 0.0950468374711  
ACCTACCA -0.0518052487749  
ACCTACCC -0.0189532104249  
ACCTACCG 0.00906553936857  
ACCTACCT -0.268289960059  
ACCTACGA 0.0714061168607  
ACCTACGC -0.217398950648  
ACCTACGG -0.0744756005179  
ACCTACGT -0.0977980399454  
ACCTACTA -0.271111769522  
ACCTACTC -0.215378571724  
ACCTACTG -0.279283703458  
ACCTAGAA 0.115290176128  
ACCTAGAC -0.170424098836  
ACCTAGAG -0.203895830931  
ACCTAGAT 0.276608680547

ACCTAGCA -0.124606030525  
ACCTAGCC -0.145462174449  
ACCTAGCG -0.130420347363  
ACCTAGCT -0.201609634648  
ACCTAGGA -0.221561330152  
ACCTAGGC -0.194341745035  
ACCTAGGG -0.219327483204  
ACCTAGGT -0.180471154986  
ACCTAGTA -0.12264913907  
ACCTAGTC -0.175198542731  
ACCTAGTG -0.146276397747  
ACCTATAA -0.0310190287804  
ACCTATAC -0.0606416475318  
ACCTATAG -0.0801855741428  
ACCTATAT 0.156728353698  
ACCTATCA -0.0459133626348  
ACCTATCC -0.117570738783  
ACCTATCG 0.0198212098697  
ACCTATCT -0.0542494144572  
ACCTATGA -0.0485573308614  
ACCTATGC -0.231476197958  
ACCTATGG -0.111365961664  
ACCTATTA 0.0399090550606  
ACCTATTC -0.061170076885  
ACCTATTG -0.0616805638465  
ACCTCAAA -0.165379231422  
ACCTCAAC -0.169913314076  
ACCTCAAG -0.154236447091  
ACCTCAAT 0.0841580111384  
ACCTCACA -0.00343974094936  
ACCTCACC -0.133815087415  
ACCTCACG -0.229161588459  
ACCTCACT -0.205504352839  
ACCTCAGA -0.0955694400853  
ACCTCAGC -0.264392145189  
ACCTCAGG -0.10533825817  
ACCTCAGT -0.265759507802  
ACCTCATA -0.0266178039819  
ACCTCATC 0.0667419410874  
ACCTCATG -0.234095052378  
ACCTCCAA -0.143999371272  
ACCTCCAC -0.312150805267  
ACCTCCAG -0.293098933569  
ACCTCCAT 0.0669269224288  
ACCTCCCA -0.0611497558448  
ACCTCCCC -0.290876287515  
ACCTCCCG -0.198362486044  
ACCTCCCT -0.259181463869  
ACCTCCGA -0.288930130734  
ACCTCCGC -0.293963395645  
ACCTCCGG -0.311861701688  
ACCTCCGT -0.265453271144  
ACCTCCTA -0.352183175143  
ACCTCCTC -0.338005341801

ACCTCCTG -0.102859791391  
ACCTCGAA -0.0527704012552  
ACCTCGAC -0.221612948581  
ACCTCGAG -0.00105764107355  
ACCTCGAT 0.107348395227  
ACCTCGCA -0.170605748812  
ACCTCGCC -0.177295021629  
ACCTCGCG -0.198445666944  
ACCTCGCT -0.227217795785  
ACCTCGGA -0.1263511433  
ACCTCGGC -0.238761964839  
ACCTCGGG -0.150917907958  
ACCTCGTA -0.0252443782658  
ACCTCGTC -0.0993755501158  
ACCTCGTG -0.203258113905  
ACCTCTAA -0.16280441368  
ACCTCTAC -0.294907866146  
ACCTCTAG -0.126450515682  
ACCTCTAT -0.105085366156  
ACCTCTCA -0.251739215038  
ACCTCTCC -0.0423046064005  
ACCTCTCG -0.109598299115  
ACCTCTCT -0.0408930153536  
ACCTCTGA 0.0382144916535  
ACCTCTGC -0.258827761425  
ACCTCTGG -0.161106286785  
ACCTCTTA 0.0742238373726  
ACCTCTTC -0.0764405248541  
ACCTCTTG -0.271851661167  
ACCTGAAA 0.0811040634147  
ACCTGAAC -0.180985932964  
ACCTGAAG -0.080101243207  
ACCTGAAT 0.077079379096  
ACCTGACA -0.125663937692  
ACCTGACC -0.383575483218  
ACCTGACG -0.235140144632  
ACCTGACT -0.272904483431  
ACCTGAGA 0.000861743285986  
ACCTGAGC 0.0692297193339  
ACCTGAGG 0.0700970051751  
ACCTGAGT -0.175156408114  
ACCTGATA 0.19560134234  
ACCTGATC 0.0385444114362  
ACCTGATG -0.102796113855  
ACCTGCAA -0.0451851419312  
ACCTGCAC -0.073710127905  
ACCTGCAG 0.0489106225891  
ACCTGCAT 0.0564827047583  
ACCTGCCA -0.249301214245  
ACCTGCCC -0.173616614491  
ACCTGCCG -0.246395218089  
ACCTGCCT -0.147179147886  
ACCTGCGA 0.0173641269132  
ACCTGCGC -0.182275877872

ACCTGCGG -0.176405635826  
ACCTGCGT -0.260335260211  
ACCTGCTA -0.151501290098  
ACCTGCTC -0.324496995223  
ACCTGCTG -0.201223631135  
ACCTGGAA -0.117700742505  
ACCTGGAC -0.281941653366  
ACCTGGAG -0.3762582895  
ACCTGGAT 0.210707236434  
ACCTGGCA -0.11849683095  
ACCTGGCC -0.237495494365  
ACCTGGCG -0.299713876967  
ACCTGGCT -0.187047180111  
ACCTGGGA -0.314690307446  
ACCTGGGC -0.0497961175488  
ACCTGGGG -0.38455235934  
ACCTGGTA -0.202704793488  
ACCTGGTC -0.233508822873  
ACCTGGTG -0.311578398864  
ACCTGTAA 0.163394232243  
ACCTGTAC -0.179844129688  
ACCTGTAG -0.033798261071  
ACCTGTAT 0.0956380517215  
ACCTGTCA -0.255558979569  
ACCTGTCC -0.186315863218  
ACCTGTCT -0.202077918667  
ACCTGTCT -0.0861292935485  
ACCTGTGA -0.108899862417  
ACCTGTGC -0.224169678125  
ACCTGTGG -0.228087677023  
ACCTGTTA -0.163369257449  
ACCTGTTC -0.300377378866  
ACCTGTTG -0.0896424228889  
ACCTTAAA 0.00561966607382  
ACCTTAAC -0.229642977566  
ACCTTAAG -0.0191331576681  
ACCTTAAT 0.118886103735  
ACCTTACA -0.12518577341  
ACCTTACC -0.272129786244  
ACCTTACG -0.181035501965  
ACCTTACT -0.140023528828  
ACCTTAGA -0.0993057106539  
ACCTTAGC 0.0105998560544  
ACCTTAGG -0.113417825539  
ACCTTAGT 0.049819792244  
ACCTTATA -0.071196251177  
ACCTTATC -0.0344156291792  
ACCTTATG 0.0268541564783  
ACCTTCAA -0.0879036840146  
ACCTTCAC -0.112074464746  
ACCTTCAG -0.178782014704  
ACCTTCAT 0.109166994327  
ACCTTCCA -0.0281723757874  
ACCTTCCC -0.167235630825

ACCTTCCG -0.0851497078636  
ACCTTCCT -0.187981770578  
ACCTTCGA -0.342918635362  
ACCTTCGC -0.36415695936  
ACCTTCGG -0.223338653611  
ACCTTCGT -0.223752810727  
ACCTTCTA -0.0188804081883  
ACCTTCTC 0.00471840638288  
ACCTTCTG -0.191612565301  
ACCTTGAA -0.098638929478  
ACCTTGAC -0.0925500997689  
ACCTTGAG -0.24587913224  
ACCTTGAT 0.140618088655  
ACCTTGCA -0.00722392940301  
ACCTTGCC -0.123429682008  
ACCTTGCG -0.0848366045508  
ACCTTGCT 0.0857792454629  
ACCTTGGA -0.273267532435  
ACCTTGGC -0.048477121426  
ACCTTGGG -0.142640819323  
ACCTTGTA -0.152043227624  
ACCTTGTC -0.157431532627  
ACCTTGTG -0.124435961256  
ACCTTTAA 0.173240334462  
ACCTTTAC 0.0132794128595  
ACCTTTAG -0.110430090628  
ACCTTTAT 0.0492131249707  
ACCTTTCA -0.0187818681583  
ACCTTTCC -0.0439734967864  
ACCTTTCCG -0.0935093694028  
ACCTTTCT -0.168867859807  
ACCTTTGA -0.158338640882  
ACCTTTGC -0.0539191763788  
ACCTTTGG -0.175828281074  
ACCTTTTA 0.00405465573747  
ACCTTTTC 0.0211754487128  
ACCTTTTG -0.0505466628062  
ACGAAAAA 0.252212725269  
ACGAAAAC -0.134738043829  
ACGAAAAG -0.126999408772  
ACGAAAAT 0.291447094477  
ACGAAACA -0.151918877336  
ACGAAACC 0.00843078378335  
ACGAAACG 0.101791076259  
ACGAAACT 0.15988482004  
ACGAAAGA 0.0468712363963  
ACGAAAGC -0.238461474847  
ACGAAAGG -0.211083440747  
ACGAAAGT -0.181809092462  
ACGAAATA 0.282515711335  
ACGAAATC 0.46946809068  
ACGAAATG 0.0597718931052  
ACGAACAA 0.0979167183661  
ACGAACAC -0.0198898181006

ACGAACAG -0.240420619031  
ACGAACAT -0.0640737794063  
ACGAACCA -0.240211790111  
ACGAACCC -0.178110292232  
ACGAACCG -0.153073799304  
ACGAACCT -0.133126973399  
ACGAACGA 0.075470787592  
ACGAACGC -0.0057575381561  
ACGAACGG -0.0568859041594  
ACGAACGT -0.126248206422  
ACGAACTA -0.0692455805071  
ACGAACTC -0.176262604886  
ACGAACTG -0.0487637031837  
ACGAAGAA 0.0343873986396  
ACGAAGAC -0.0515510489449  
ACGAAGAG -0.190021477272  
ACGAAGAT 0.313922252277  
ACGAAGCA -0.080225250542  
ACGAAGCC -0.27486141777  
ACGAAGCG -0.136347469333  
ACGAAGCT -0.112531193559  
ACGAAGGA -0.119504405817  
ACGAAGGC -0.145034085615  
ACGAAGGG -0.192147961365  
ACGAAGTA -0.00871903048352  
ACGAAGTC -0.292254646555  
ACGAAGTG -0.254110810639  
ACGAATAA 0.0457559323518  
ACGAATAC 0.0390962241703  
ACGAATAG -0.0621219973285  
ACGAATAT 0.179558346225  
ACGAATCA 0.259733975234  
ACGAATCC 0.355702396643  
ACGAATCG 0.3151760576  
ACGAATCT 0.382338342956  
ACGAATGA 0.126338109384  
ACGAATGC -0.186887748639  
ACGAATGG -0.130258357531  
ACGAATTA 0.0848674846536  
ACGAATTC 0.104567560471  
ACGAATTG 0.0704382198454  
ACGACAAA 0.0288073983781  
ACGACAAC -0.0769047284199  
ACGACAAG -0.137115083993  
ACGACAAT 0.154039714646  
ACGACACA -0.190862016196  
ACGACACC -0.0796058019207  
ACGACACG -0.238540525  
ACGACACT -0.135266479721  
ACGACAGA 0.0971577264731  
ACGACAGC -0.213907126273  
ACGACAGG -0.174291101243  
ACGACAGT -0.331518368764  
ACGACATA -0.154675206811

ACGACATC 0.117818920849  
ACGACATG -0.0615351488654  
ACGACCAA -0.0306156568988  
ACGACCAC -0.232343965944  
ACGACCAG -0.169842766515  
ACGACCAT -0.13729601212  
ACGACCCA -0.237166050654  
ACGACCCC -0.280492914458  
ACGACCCG -0.0833932898339  
ACGACCCT -0.136154603277  
ACGACCGA -0.0170367130698  
ACGACCGC -0.352629581792  
ACGACCGG -0.000318939456971  
ACGACCGT -0.268937476015  
ACGACCTA -0.277933469756  
ACGACCTC -0.329711972959  
ACGACCTG -0.274350997562  
ACGACGAA 0.134689786205  
ACGACGAC -0.138973671803  
ACGACGAG -0.280422755353  
ACGACGAT 0.140860361814  
ACGACGCA -0.257462491145  
ACGACGCC -0.273012958874  
ACGACGCG -0.0809923761063  
ACGACGCT -0.152953292392  
ACGACGGA 0.00936060026969  
ACGACGGC -0.344936501057  
ACGACGGG -0.162521875826  
ACGACGTA 0.0417262993021  
ACGACGTC -0.235743446823  
ACGACGTG -0.103067809748  
ACGACTAA -0.0967021514181  
ACGACTAC -0.229956846038  
ACGACTAG -0.191895052232  
ACGACTAT -0.0417458011868  
ACGACTCA 0.0803361970176  
ACGACTCC -0.0217050567852  
ACGACTCG -0.0460658544453  
ACGACTCT 0.0987912673445  
ACGACTGA 0.0531397122691  
ACGACTGC -0.217783119819  
ACGACTGG -0.18278671417  
ACGACTTA -0.0592401447921  
ACGACTTC -0.0638793721325  
ACGACTTG -0.187673784186  
ACGAGAAA 0.202768884587  
ACGAGAAC -0.114614121725  
ACGAGAAG -0.0700375801991  
ACGAGAAT 0.279420505298  
ACGAGACA -0.196813719409  
ACGAGACC -0.133904618532  
ACGAGACG -0.0186738466883  
ACGAGACT 0.116373949707  
ACGAGAGA 0.0729503608291

ACGAGAGC 0.0875214411363  
ACGAGAGG 0.0753125151017  
ACGAGAGT -0.153868528214  
ACGAGATA 0.276106685198  
ACGAGATC 0.414680520741  
ACGAGATG -0.11469310891  
ACGAGCAA -0.0520183384382  
ACGAGCAC -0.18288760267  
ACGAGCAG -0.163977502083  
ACGAGCAT -0.126951040969  
ACGAGCCA -0.197102384083  
ACGAGCCC -0.220252974301  
ACGAGCCG -0.361340577014  
ACGAGCCT -0.277229723912  
ACGAGCGA 0.0290991505166  
ACGAGCGC -0.169557856637  
ACGAGCGG -0.227222163469  
ACGAGCGT 0.0680695833437  
ACGAGCTA -0.0605136817258  
ACGAGCTC -0.151285419266  
ACGAGCTG -0.130050893891  
ACGAGGAA -0.125279549522  
ACGAGGAC -0.190630023963  
ACGAGGAG -0.208233776129  
ACGAGGAT 0.185560170215  
ACGAGGCA -0.0989387093713  
ACGAGGCC -0.226802366808  
ACGAGGCG -0.240300049468  
ACGAGGCT -0.263060989475  
ACGAGGGA 0.0105697275064  
ACGAGGGC -0.279353033104  
ACGAGGGG -0.255130841381  
ACGAGGTA -0.0287245986651  
ACGAGGTC -0.275252875358  
ACGAGGTG -0.178056222025  
ACGAGTAA 0.134682452209  
ACGAGTAC 0.0555602591931  
ACGAGTAG -0.140538445707  
ACGAGTAT 0.190969206121  
ACGAGTCA 0.0947760268023  
ACGAGTCC -0.346273647187  
ACGAGTCG -0.132413312049  
ACGAGTCT -0.185806834002  
ACGAGTGA -0.00131109842751  
ACGAGTGC -0.195383996052  
ACGAGTGG -0.0634237019456  
ACGAGTTA -0.0501865501866  
ACGAGTTC -0.139095494259  
ACGAGTTG -0.144488332071  
ACGATAAA 0.0505178718714  
ACGATAAC 0.0656124444003  
ACGATAAG 0.0931800134005  
ACGATAAT 0.216911308511  
ACGATACA -0.0516786431344



ACGATACC 0.0991694173512  
ACGATACG 0.198524971252  
ACGATACT 0.14047518593  
ACGATAGA 0.0477240325725  
ACGATAGC -0.143014915742  
ACGATAGG 0.0222148420108  
ACGATAGT 0.0962518992822  
ACGATATA 0.239589225229  
ACGATATC 0.435963511721  
ACGATATG 0.265105873594  
ACGATCAA 0.0205145722762  
ACGATCAC 0.164451143406  
ACGATCAG 0.0985212002657  
ACGATCAT 0.0767888294417  
ACGATCCA 0.02493011110195  
ACGATCCC 0.238854557036  
ACGATCCG 0.221439684192  
ACGATCCT 0.288959758657  
ACGATCGA 0.079780779043  
ACGATCGC 0.311058992877  
ACGATCGG 0.140060436633  
ACGATCGT 0.197711404938  
ACGATCTA 0.270861770862  
ACGATCTC 0.278976367976  
ACGATCTG 0.353425107479  
ACGATGAA -0.0235727663277  
ACGATGAC -0.104058604059  
ACGATGAG -0.273329970256  
ACGATGAT 0.0732653795568  
ACGATGCA 0.0833959840295  
ACGATGCC -0.180720860127  
ACGATGCG 0.0738808639227  
ACGATGCT -0.00818887177653  
ACGATGGA -0.0690132495071  
ACGATGGC -0.145467201478  
ACGATGGG 0.170340379006  
ACGATGTA -0.0942380823778  
ACGATGTC -0.17645509867  
ACGATGTG -0.208512195727  
ACGATTAA 0.0363793545612  
ACGATTAC 0.437336785822  
ACGATTAG -0.0120139713441  
ACGATTAT 0.201016766056  
ACGATTCA 0.166457800829  
ACGATTCC 0.412250096713  
ACGATTCT 0.306634891207  
ACGATTCT 0.346164106509  
ACGATTGA 0.0644735644736  
ACGATTGC 0.295122946638  
ACGATTGG 0.137902679062  
ACGATTTA 0.104937118165  
ACGATTTT 0.427895612054  
ACGATTTG 0.242218802825  
ACGCAAAA 0.165014634716

ACGCAAAC -0.185527197489  
ACGCAAAG -0.15647304998  
ACGCAAAT 0.200518700519  
ACGCAACA 0.115287463772  
ACGCAACC 0.0903796358342  
ACGCAACG 0.117639678246  
ACGCAACT -0.0217170426925  
ACGCAAGA -0.0295028165868  
ACGCAAGC -0.13956232716  
ACGCAAGG -0.121229041037  
ACGCAAGT -0.158292843475  
ACGCAATA 0.282080684365  
ACGCAATC 0.478902651767  
ACGCAATG -0.0124463306281  
ACGCACAA 0.0203521090779  
ACGCACAC -0.133521893681  
ACGCACAG -0.272027181629  
ACGCACAT 0.0820485682795  
ACGCACCA -0.269141759847  
ACGCACCC -0.175381155514  
ACGCACCG -0.109747623893  
ACGCACCT -0.129851295309  
ACGCACGA -0.0575878909212  
ACGCACGC 0.0185390100947  
ACGCACGG -0.169335472789  
ACGCACGT 0.0414581351422  
ACGCACTA -0.0277453762302  
ACGCACTC -0.213287284795  
ACGCACTG -0.0832835777319  
ACGCAGAA 0.133829421708  
ACGCAGAC -0.149296286512  
ACGCAGAG -0.0920792488729  
ACGCAGAT 0.328552659431  
ACGCAGCA -0.0638698453457  
ACGCAGCC -0.232825808749  
ACGCAGCG -0.0928729185795  
ACGCAGCT -0.20605040302  
ACGCAGGA -0.129244526061  
ACGCAGGC -0.318071711435  
ACGCAGGG -0.222065094842  
ACGCAGTA -0.131311929779  
ACGCAGTC -0.13391087403  
ACGCAGTG -0.203564730693  
ACGCATAA 0.0472741472814  
ACGCATAC -0.00616180919211  
ACGCATAG 0.00152356212962  
ACGCATAT 0.167767859098  
ACGCATCA 0.0864183742972  
ACGCATCC 0.100490500208  
ACGCATCG 0.0510726042495  
ACGCATCT -0.147536486036  
ACGCATGA -0.118899337518  
ACGCATGC -0.187852745174  
ACGCATGG -0.145569878943

ACGCATTA 0.0530112479289  
ACGCATTC -0.111344573491  
ACGCATTG -0.0701323919895  
ACGCCAAA 0.0807653846996  
ACGCCAAC -0.340321584471  
ACGCCAAG -0.222683979104  
ACGCCAAT -0.0459054677398  
ACGCCACA -0.144720536784  
ACGCCACC -0.184078861405  
ACGCCACG -0.134034446347  
ACGCCACT -0.0601627831956  
ACGCCAGA -0.129764224261  
ACGCCAGC -0.326384582096  
ACGCCAGG -0.152927683906  
ACGCCAGT -0.230791177711  
ACGCCATA -0.0454609149548  
ACGCCATC -0.25440323092  
ACGCCATG -0.0575889669167  
ACGCCCAA -0.0146772116469  
ACGCCCAC -0.274697316599  
ACGCCCAG -0.250581114543  
ACGCCCAT -0.194469943186  
ACGCCCCA -0.259201832511  
ACGCCCCC -0.244970355486  
ACGCCCCG -0.296431161456  
ACGCCCCCT -0.305196559147  
ACGCCCGA -0.134833985371  
ACGCCCGC -0.226996770376  
ACGCCCGG -0.23266781964  
ACGCCCGT -0.0725255686255  
ACGCCCTA -0.13721614327  
ACGCCCTC -0.2983143017  
ACGCCCTG -0.332927927205  
ACGCCGAA 0.109959822081  
ACGCCGAC -0.234795736837  
ACGCCGAG -0.0800678839104  
ACGCCGAT 0.0825660371115  
ACGCCGCA -0.143411452366  
ACGCCGCC -0.186765910056  
ACGCCGCG -0.00831295665058  
ACGCCGCT -0.122404168217  
ACGCCGGA -0.103437151011  
ACGCCGGC -0.250957960671  
ACGCCGGG -0.0578990320064  
ACGCCGTA -0.333245138975  
ACGCCGTC -0.398432370268  
ACGCCGTG -0.133140075043  
ACGCCTAA 0.0152673334492  
ACGCCTAC -0.222009983489  
ACGCCTAG -0.062499483031  
ACGCCTAT -0.215802301568  
ACGCCTCA -0.0973790361492  
ACGCCTCC -0.197698437465  
ACGCCTCG -0.1536695206

ACGCCTCT -0.235325857749  
ACGCCTGA 0.0094088160117  
ACGCCTGC -0.358312557366  
ACGCCTGG -0.2519689808  
ACGCCTTA -0.108399032641  
ACGCCTTC -0.374407365089  
ACGCCTTG -0.213806402405  
ACGCGAAA 0.191760631155  
ACGCGAAC 0.000823137186774  
ACGCGAAG -0.0684673889405  
ACGCGAAT 0.265278132596  
ACGCGACA 0.00637965789481  
ACGCGACC -0.205220455053  
ACGCGACG -0.133741434697  
ACGCGACT -0.222919241877  
ACGCGAGA 0.0995941694707  
ACGCGAGC -0.140648898583  
ACGCGAGG -0.102995549444  
ACGCGAGT -0.12693547542  
ACGCGATA 0.254421087754  
ACGCGATC 0.444731137274  
ACGCGATG 0.111858134493  
ACGCGCAA 0.111833317519  
ACGCGCAC -0.0488298215571  
ACGCGCAG -0.0676601235824  
ACGCGCAT -0.0302190462983  
ACGCGCCA -0.163819218757  
ACGCGCCC -0.156480104386  
ACGCGCCG -0.255834266125  
ACGCGCCT -0.13458212247  
ACGCGCGA 0.227085453327  
ACGCGCGC 0.0668171943845  
ACGCGCGG -0.0698283991364  
ACGCGCGT 0.0833450478088  
ACGCGCTA -0.0842178638424  
ACGCGCTC -0.165327332953  
ACGCGCTG -0.0163405991921  
ACGCGGAA 0.0310555243316  
ACGCGGAC -0.189136733687  
ACGCGGAG -0.273110355722  
ACGCGGAT 0.218350693051  
ACGCGGCA -0.0557719717584  
ACGCGGCC -0.153287433321  
ACGCGGCG -0.12538154205  
ACGCGGCT -0.272249374936  
ACGCGGGA -0.11333049211  
ACGCGGGC -0.190921429979  
ACGCGGGG -0.151335434295  
ACGCGGTA -0.123931942066  
ACGCGGTC -0.320612241026  
ACGCGGTG -0.245408675912  
ACGCGTAA 0.122396589856  
ACGCGTAC -0.0131478872725  
ACGCGTAG 0.00878447917199

ACGCGTAT 0.242101997766  
ACGCGTCA -0.265731729918  
ACGCGTCC 0.0995357765888  
ACGCGTCG 0.168227456106  
ACGCGTCT -0.142256247363  
ACGCGTGA 0.093267300716  
ACGCGTGC -0.0529085429574  
ACGCGTGG 0.072103784225  
ACGCGTTA -0.0480341045212  
ACGCGTTC -0.120525928316  
ACGCGTTG -0.152280606994  
ACGCTAAA 0.0801614286463  
ACGCTAAC -0.117460949987  
ACGCTAAG -0.0165606377728  
ACGCTAAT -0.101651238015  
ACGCTACA -0.00754812186184  
ACGCTACC -0.140789078288  
ACGCTACG -0.107886921051  
ACGCTACT -0.168202657356  
ACGCTAGA 0.0474738952169  
ACGCTAGC -0.239390091727  
ACGCTAGG -0.00135239087819  
ACGCTAGT -0.18354788761  
ACGCTATA 0.0683231440807  
ACGCTATC 0.0407195462873  
ACGCTATG 0.0831864922774  
ACGCTCAA 0.00809661335977  
ACGCTCAC -0.28551368374  
ACGCTCAG -0.215097927335  
ACGCTCAT -0.0963271765773  
ACGCTCCA -0.241695720638  
ACGCTCCC -0.0534080119528  
ACGCTCCG 0.00264718906795  
ACGCTCCT 0.0457238162668  
ACGCTCGA -0.0125458178904  
ACGCTCGC 0.0126968022598  
ACGCTCGG -0.142979822189  
ACGCTCTA -0.080785193181  
ACGCTCTC -0.332639463466  
ACGCTCTG -0.131211108727  
ACGCTGAA 0.00552315561622  
ACGCTGAC -0.11179740265  
ACGCTGAG 0.146169585564  
ACGCTGAT 0.311277125318  
ACGCTGCA 0.0214586541901  
ACGCTGCC -0.0570593344671  
ACGCTGCG -0.195403750283  
ACGCTGCT -0.144685270689  
ACGCTGGA -0.0781946380736  
ACGCTGGC -0.0598329462564  
ACGCTGGG -0.153883935153  
ACGCTGTA -0.217128492636  
ACGCTGTC -0.341314922761  
ACGCTGTG -0.0288045691466

ACGCTTAA -0.0822050685425  
ACGCTTAC 0.04952196455  
ACGCTTAG -0.109578693385  
ACGCTTAT -0.052891534129  
ACGCTTCA -0.100190595999  
ACGCTTCC -0.112259462773  
ACGCTTCG 0.00912517169452  
ACGCTTCT -0.107812972091  
ACGCTTGA 0.0612328461176  
ACGCTTGC -0.283838208417  
ACGCTTGG -0.343521252574  
ACGCTTTA -0.0320499562924  
ACGCTTTC -0.299915947625  
ACGCTTTG -0.190313722571  
ACGGAAAA 0.209247242761  
ACGGAAAC -0.123410837324  
ACGGAAAG -0.0931165325105  
ACGGAAAT 0.390828667985  
ACGGAACA -0.0395027490794  
ACGGAACC 0.0420304664861  
ACGGAACG -0.171738054823  
ACGGAACT -0.0790282775641  
ACGGAAGA -0.025947778918  
ACGGAAGC -0.251189706576  
ACGGAAGG -0.196265971964  
ACGGAAGT -0.218149479698  
ACGGAATA 0.276382443049  
ACGGAATC 0.445157405312  
ACGGAATG -0.065187777309  
ACGGACAA 0.0972994267563  
ACGGACAC -0.187779018627  
ACGGACAG -0.0281507913921  
ACGGACAT -0.064979717786  
ACGGACCA -0.228587502682  
ACGGACCC 0.0199491981927  
ACGGACCG -0.147644095973  
ACGGACCT -0.325939841396  
ACGGACGA -0.111111111111  
ACGGACGC -0.168046274257  
ACGGACGG -0.0446540100095  
ACGGACGT 0.109340833575  
ACGGACTA -0.0405262981188  
ACGGACTC -0.279029221486  
ACGGACTG -0.276176260609  
ACGGAGAA 0.220307083943  
ACGGAGAC -0.026476062568  
ACGGAGAG -0.248387456895  
ACGGAGAT 0.313382188711  
ACGGAGCA -0.138342897526  
ACGGAGCC -0.295828681305  
ACGGAGCG -0.190187223496  
ACGGAGCT -0.349756776496  
ACGGAGGA -0.105637565083  
ACGGAGGC -0.179336522083

ACGGAGGG -0.249064260667  
ACGGAGTA 0.14881410336  
ACGGAGTC -0.266156585448  
ACGGAGTG -0.188790138551  
ACGGATAA 0.0285446304096  
ACGGATAC 0.259828699223  
ACGGATAG -0.109392448569  
ACGGATAT 0.401990144414  
ACGGATCA 0.0671058297993  
ACGGATCC 0.185387911214  
ACGGATCG 0.194490999035  
ACGGATCT 0.227386991526  
ACGGATGA -0.16909009702  
ACGGATGC -0.192490479728  
ACGGATGG -0.004254651358  
ACGGATTA 0.307732677387  
ACGGATTC 0.410742698621  
ACGGATTG 0.211662075298  
ACGGCAAA 0.141586222299  
ACGGCAAC -0.158753001569  
ACGGCAAG -0.140885767775  
ACGGCAAT 0.200707283782  
ACGGCACA 0.032824367657  
ACGGCACC -0.0237724721356  
ACGGCACG -0.257273222138  
ACGGCACT -0.143761493944  
ACGGCAGA -0.111922934885  
ACGGCAGC -0.192613449988  
ACGGCAGG -0.242970082633  
ACGGCAGT -0.236691063971  
ACGGCATA 0.108031940906  
ACGGCATC -0.131682517901  
ACGGCATG 0.100906691816  
ACGGCCAA -0.12814329481  
ACGGCCAC -0.298395416811  
ACGGCCAG -0.236511795203  
ACGGCCAT -0.236436096154  
ACGGCCCA -0.389185137418  
ACGGCCCC -0.110641338349  
ACGGCCCG -0.2602833568  
ACGGCCCT -0.267993229786  
ACGGCCGA -0.0630379288653  
ACGGCCGC -0.266650859773  
ACGGCCGG -0.0115343784037  
ACGGCCGT -0.133216762982  
ACGGCCTA -0.162390935781  
ACGGCCTC -0.05582839715  
ACGGCCTG -0.441522353103  
ACGGCGAA -0.0717095777265  
ACGGCGAC -0.126611346154  
ACGGCGAG -0.206708284266  
ACGGCGAT 0.0687229929654  
ACGGCGCA -0.0388184502394  
ACGGCGCC -0.190149620235

ACGGCGCG -0.146966701683  
ACGGCGCT -0.193803602465  
ACGGCGGA -0.11776164348  
ACGGCGGC -0.244581928135  
ACGGCGGG -0.188401810224  
ACGGCGTA -0.0864459075445  
ACGGCGTC -0.310798296746  
ACGGCGTG -0.323812910179  
ACGGCTAA -0.0212878550105  
ACGGCTAC -0.236950199176  
ACGGCTAG -0.139603162671  
ACGGCTAT -0.145729057647  
ACGGCTCA -0.127510673505  
ACGGCTCC 0.0911972730524  
ACGGCTCG -0.126038012912  
ACGGCTCT -0.0567967676909  
ACGGCTGA -0.0889137058637  
ACGGCTGC -0.353407809834  
ACGGCTGG -0.18642238706  
ACGGCTTA 0.0556631011176  
ACGGCTTC -0.342236902203  
ACGGCTTG -0.347965328593  
ACGGGAAA 0.0673846558105  
ACGGGAAC -0.345269501024  
ACGGGAAG -0.275077935716  
ACGGGAAT 0.318690101677  
ACGGGACA -0.0763373617556  
ACGGGACC -0.204244608544  
ACGGGACG -0.142099578946  
ACGGGACT -0.182521898806  
ACGGGAGA -0.0897051160605  
ACGGGAGC -0.0911514396097  
ACGGGAGG 0.0100086312208  
ACGGGAGT -0.171777462194  
ACGGGATA 0.183259490668  
ACGGGATC 0.166427742458  
ACGGGATG -0.367247610974  
ACGGGCAA -0.0540820658172  
ACGGGCAC -0.23060192299  
ACGGGCAG -0.296149762511  
ACGGGCAT -0.0964124055042  
ACGGGCCA -0.234598221054  
ACGGGCCC -0.293095396883  
ACGGGCCG -0.248337348768  
ACGGGCCT -0.277203365659  
ACGGGCGA 0.0991387049919  
ACGGGCGC -0.335075690533  
ACGGGCGG -0.0995910187603  
ACGGGCTA 0.0048996003872  
ACGGGCTC -0.171305520645  
ACGGGCTG -0.312352018611  
ACGGGGAA -0.111038057037  
ACGGGGAC -0.339718728379  
ACGGGGAG -0.162606365824



ACGGGGAT 0.132916067531  
ACGGGGCA -0.212666870646  
ACGGGGCC -0.213820632815  
ACGGGGCG -0.0755849000974  
ACGGGGCT -0.243551651726  
ACGGGGGA -0.0421302385344  
ACGGGGGC -0.273381079752  
ACGGGGGG -0.14065232182  
ACGGGGTA -0.115591590964  
ACGGGGTC -0.281425441316  
ACGGGGTG -0.183683596755  
ACGGGTAA -0.153366609018  
ACGGGTAC -0.114631189674  
ACGGGTAG -0.120419856548  
ACGGGTAT -0.053015627395  
ACGGGTCA -0.166360636213  
ACGGGTCC -0.233695449922  
ACGGGTCCG -0.283645975443  
ACGGGTCT -0.251336139295  
ACGGGTGA -0.181193139274  
ACGGGTGC -0.468003682762  
ACGGGTGG -0.0401918532673  
ACGGGTTA 0.0607011970648  
ACGGTTTC -0.326819840629  
ACGGTTTG -0.202491529022  
ACGGTAAA 0.0237661904329  
ACGGTAAC -0.12623693447  
ACGGTAAG -0.0103760866149  
ACGGTAAT 0.21736677299  
ACGGTACA -0.0143317589904  
ACGGTACC 0.0602903178661  
ACGGTACG -0.095485292455  
ACGGTACT -0.0119086028177  
ACGGTAGA -0.0260585534623  
ACGGTAGC -0.113686224881  
ACGGTAGG 0.00997819080154  
ACGGTAGT -0.123205250169  
ACGGTATA -0.0271056180147  
ACGGTATC 0.280384371145  
ACGGTATG -0.303042283744  
ACGGTCAA -0.0773588595799  
ACGGTCAC -0.124413126125  
ACGGTCAG -0.226655702346  
ACGGTCAT -0.133289214267  
ACGGTCCA -0.178466795806  
ACGGTCCC -0.277648784144  
ACGGTCCG -0.123780134526  
ACGGTCCT -0.375472987684  
ACGGTCGA -0.210746080191  
ACGGTCGC -0.225831162387  
ACGGTCGG -0.0921647450017  
ACGGTCTA 0.095752777571  
ACGGTCTC -0.29383675679  
ACGGTCTG -0.0988755711068

ACGGTGAA -0.089746134948  
ACGGTGAC -0.197996108694  
ACGGTGAG -0.165816249176  
ACGGTGAT 0.245836745837  
ACGGTGCA 0.0311123729835  
ACGGTGCC -0.279186687698  
ACGGTGCG -0.116345821225  
ACGGTGCT -0.230335602793  
ACGGTGGA -0.0739757523558  
ACGGTGGC -0.0865568319976  
ACGGTGGG 9.78746047106E-5  
ACGGTGTA 0.0425793595761  
ACGGTGTC -0.184106049347  
ACGGTGTG -0.247312983959  
ACGGTTAA -0.0210922388561  
ACGGTTAC 0.116091148224  
ACGGTTAG -0.157164168429  
ACGGTTAT -0.033608753093  
ACGGTTCA -0.182296311324  
ACGGTTCC -0.25630476789  
ACGGTTCG -0.124321101359  
ACGGTTCT -0.195015754087  
ACGGTTGA -0.216714079493  
ACGGTTGC -0.024833811702  
ACGGTTGG -0.0090950179549  
ACGGTTTA 0.0800402598938  
ACGGTTTC -0.120418393429  
ACGGTTTG -0.333927296681  
ACGTAAAA 0.144090371363  
ACGTAAAC -0.129759588508  
ACGTAAAG 0.00569257607498  
ACGTAAAT 0.196505292419  
ACGTAAACA 0.108758932286  
ACGTAAACC 0.183554374722  
ACGTAAACG -0.0119858150161  
ACGTAAACT 0.034526261799  
ACGTAAAGA 0.0195112515784  
ACGTAAAGC -0.0653504744414  
ACGTAAAGG -0.119679659253  
ACGTAAAGT 0.091830657369  
ACGTAAATA 0.276051533627  
ACGTAAATC 0.477013642037  
ACGTAAATG -0.0339637157819  
ACGTACAA 0.118393757801  
ACGTACAC -0.00884493308736  
ACGTACAG -0.172839046713  
ACGTACAT -0.0886239118986  
ACGTACCA -0.200219448787  
ACGTACCC -0.0238047965321  
ACGTACCG -0.291486840127  
ACGTACCT -0.233514218034  
ACGTACGA 0.0432953614772  
ACGTACGC -0.203120562683  
ACGTACGG 0.0177469056958

ACGTACGT 0.0229005929197  
ACGTACTA 0.138613820432  
ACGTACTC -0.099522967944  
ACGTACTG -0.0863480252278  
ACGTAGAA 0.150332150332  
ACGTAGAC -0.0797919131252  
ACGTAGAG -0.0480732931084  
ACGTAGAT 0.155310249514  
ACGTAGCA 0.0506801567408  
ACGTAGCC -0.254801987784  
ACGTAGCG -0.134403219144  
ACGTAGCT -0.164566244275  
ACGTAGGA -0.0556796465887  
ACGTAGGC -0.168760320099  
ACGTAGGG -0.0808155996107  
ACGTAGTA -0.0413545688781  
ACGTAGTC -0.225550526406  
ACGTAGTG -0.240702800433  
ACGTATAA 0.260460719838  
ACGTATAC 0.0575851333427  
ACGTATAG 0.15712575637  
ACGTATAT 0.111865308835  
ACGTATCA 0.159350810866  
ACGTATCC 0.294634855241  
ACGTATCG 0.224311087947  
ACGTATCT 0.333358393612  
ACGTATGA -0.0860900856186  
ACGTATGC -0.198647810445  
ACGTATGG -0.186904666321  
ACGTATTA 0.174058069649  
ACGTATTC 0.121205728326  
ACGTATTG 0.180334007285  
ACGTCAAA 0.0526257006593  
ACGTCAAC -0.174768043833  
ACGTCAAG 0.13428993732  
ACGTCAAT 0.0660619296983  
ACGTCACA 0.0106539045933  
ACGTCACC 0.0727130062845  
ACGTCACG 0.0286789340379  
ACGTCACT -0.147934673286  
ACGTCAGA -0.00683465834981  
ACGTCAGC -0.185625456701  
ACGTCAGG -0.0814134645876  
ACGTCAGT -0.192640819013  
ACGTCATA -0.0545104332983  
ACGTCATC -0.143915895349  
ACGTCATG -0.0524119160483  
ACGTCCAA -0.176086309155  
ACGTCCAC -0.171730205602  
ACGTCCAG -0.142675013028  
ACGTCCAT -0.0349853463796  
ACGTCCCA -0.290850808282  
ACGTCCCC -0.132631402232  
ACGTCCCG -0.226503254191

ACGTCCCT -0.114775144034  
ACGTCCGA -0.285142575301  
ACGTCCGC -0.209204899796  
ACGTCCGG -0.176016673697  
ACGTCCTA -0.0892440634227  
ACGTCCTC -0.194200144947  
ACGTCCTG -0.24683270332  
ACGTGCGAA 0.0188356400478  
ACGTGCGAC -0.025772428341  
ACGTGCGAG -0.0342094161929  
ACGTGCGAT 0.0464800040875  
ACGTGCGA -0.0620220943996  
ACGTGCGC -0.0653183628845  
ACGTGCGG -0.104315759206  
ACGTGCGT -0.127130840426  
ACGTGCGA -0.0657677406902  
ACGTGCGC -0.195430625505  
ACGTGCGG -0.260906963088  
ACGTGCGTA 0.120055317025  
ACGTGCGTC -0.149214980694  
ACGTGCGTG -0.0774896251258  
ACGTCTAA 0.074691487847  
ACGTCTAC -0.227788503211  
ACGTCTAG -0.218264107674  
ACGTCTAT -0.0252147763188  
ACGTCTCA -0.0686902170978  
ACGTCTCC -0.186082338054  
ACGTCTCG -0.0114676320956  
ACGTCTCT -0.0778268529317  
ACGTCTGA -0.143133280942  
ACGTCTGC -0.235102227242  
ACGTCTGG -0.0624665153318  
ACGTCTTA -0.0504288227265  
ACGTCTTC 0.0276630714818  
ACGTCTTG -0.149524502789  
ACGTGAAA 0.16813281461  
ACGTGAAC 0.0507339255345  
ACGTGAAG -0.197013215409  
ACGTGAAT -0.00540061166544  
ACGTGACA 0.0250498164274  
ACGTGACC -0.136510260291  
ACGTGACG -0.24003308487  
ACGTGACT -0.00385028065079  
ACGTGAGA -0.0432169797276  
ACGTGAGC -0.109965564681  
ACGTGAGG 0.0474259687744  
ACGTGAGT -0.119257568112  
ACGTGATA 0.211139172135  
ACGTGATC 0.241727953849  
ACGTGATG -0.163198122363  
ACGTGCAA 0.108344342825  
ACGTGCAC -0.047415076549  
ACGTGCAG -0.0796347311499  
ACGTGCAT -0.135377306859

ACGTGCCA -0.123681301566  
ACGTGCCC 0.0278117997416  
ACGTGCCG -0.157047385094  
ACGTGCCT -0.281523467754  
ACGTGCGA 0.0881666824814  
ACGTGCGC -0.149856469246  
ACGTGCGG 0.013038400619  
ACGTGCTA 0.128053280803  
ACGTGCTC -0.109843967366  
ACGTGCTG -0.218610302327  
ACGTGGAA 0.0284906627117  
ACGTGGAC 0.0175643963523  
ACGTGGAG -0.242294787281  
ACGTGGAT 0.313913563937  
ACGTGGCA -0.215766633858  
ACGTGGCC -0.171375332276  
ACGTGGCG -0.0521720411276  
ACGTGGCT -0.16241097794  
ACGTGGGA -0.078397070136  
ACGTGGGC -0.12143774348  
ACGTGGGG -0.00594512528923  
ACGTGGTA 0.0363269417458  
ACGTGGTC -0.234921225654  
ACGTGGTG -0.327867496878  
ACGTGTAA -0.0149198785562  
ACGTGTAC -0.109935237339  
ACGTGTAG 0.084479796601  
ACGTGTAT 0.0182860479485  
ACGTGTCA -0.215419923086  
ACGTGTCC -0.206947028905  
ACGTGTCT -0.215574642449  
ACGTGTCT -0.0715660564145  
ACGTGTGA -0.123450970013  
ACGTGTGC -0.136167091232  
ACGTGTGG -0.0902584066456  
ACGTGTGA 0.0949296403842  
ACGTGTTC -0.0926061493411  
ACGTGTTG -0.124528365228  
ACGTTAAA 0.089133084677  
ACGTTAAC 0.0189561257662  
ACGTTAAG 0.0345386597374  
ACGTTAAT 0.153375138224  
ACGTTACA 0.0523343988275  
ACGTTACC -0.0961443537201  
ACGTTACG 0.0244647818698  
ACGTTACT 0.0650530913689  
ACGTTAGA 0.0283906496028  
ACGTTAGC -0.122682944986  
ACGTTAGG -0.090144551828  
ACGTTAGT 0.0792490756136  
ACGTTATA 0.201270624627  
ACGTTATC 0.00256855689291  
ACGTTATG -0.123800871298  
ACGTTCAA -0.0368623266365

ACGTTCAC -0.136864375233  
ACGTTCAG -0.230625502502  
ACGTTCAT -0.15997915581  
ACGTTCCA -0.113224375464  
ACGTTCCC -0.150425857919  
ACGTTCCG -0.140976952526  
ACGTTCCCT -0.0724309501948  
ACGTTCGA -0.176651113152  
ACGTTCGC -0.174686685693  
ACGTTCGG -0.0765969837306  
ACGTTCTA 0.126507448742  
ACGTTCTC -0.215023955845  
ACGTTCTG -0.000839682657864  
ACGTTGAA 0.0268366386138  
ACGTTGAC -0.133448037213  
ACGTTGAG -0.0378714334723  
ACGTTGAT 0.0979299723364  
ACGTTGCA 0.107489031731  
ACGTTGCC -0.27414127819  
ACGTTGCG 0.0815760664246  
ACGTTGCT -0.0972990859081  
ACGTTGGA -0.0923147780562  
ACGTTGGC -0.372795157409  
ACGTTGGG -0.110601009725  
ACGTTGTA -0.0529718327336  
ACGTTGTC -0.0519160855647  
ACGTTGTG -0.0762411269875  
ACGTTTAA 0.0020514744197  
ACGTTTAC 0.12910844729  
ACGTTTAG -0.0872150304255  
ACGTTTAT -0.0408949659886  
ACGTTTCA 0.0265761629398  
ACGTTTCC 0.0595775274994  
ACGTTTCG 0.0133976952159  
ACGTTTCT -0.0482624468077  
ACGTTTGA 0.0872677084798  
ACGTTTGC -0.0513284451185  
ACGTTTGG 0.0116136143004  
ACGTTTTA -0.0938247094346  
ACGTTTTC -0.0882048015706  
ACGTTTTG 0.0505781263357  
ACTAAAAA 0.150728816157  
ACTAAAAC 0.071320336051  
ACTAAAAG 0.0657029408115  
ACTAAAAT 0.257664962652  
ACTAAACA 0.143237009409  
ACTAAACC -0.123864278722  
ACTAAACG 0.0489594277473  
ACTAAACT -0.0186017824427  
ACTAAAGA 0.0401103582922  
ACTAAAGC -0.245038201362  
ACTAAAGG 0.0335169880624  
ACTAAAGT 0.0376914698543  
ACTAAATA 0.01753757217

ACTAAATC 0.211296832916  
ACTAAATG -0.0372495492799  
ACTAACAA -0.0154410608956  
ACTAACAC -0.0541018041119  
ACTAACAG 0.0880784365633  
ACTAACAT 0.166670072918  
ACTAACCA -0.00270380573411  
ACTAACCC -0.332438854295  
ACTAACCG -0.0794196400257  
ACTAACCT -0.269942295339  
ACTAACGA -0.110745750093  
ACTAACGC -0.21017587078  
ACTAACGG 0.109794011723  
ACTAACTA 0.235038068371  
ACTAACTC 0.0259281319887  
ACTAACTG -0.0146110297625  
ACTAAGAA 0.0948620797106  
ACTAAGAC -0.0775174167332  
ACTAAGAG 0.0384695990757  
ACTAAGAT 0.210611437884  
ACTAAGCA 0.00710317994157  
ACTAAGCC -0.157881822969  
ACTAAGCG -0.191646828206  
ACTAAGCT -0.0661787513338  
ACTAAGGA -0.195723052898  
ACTAAGGC -0.181174945885  
ACTAAGGG -0.0561939032965  
ACTAAGTA -0.0227789773244  
ACTAAGTC -0.0752403561158  
ACTAAGTG -0.0993297495172  
ACTAATAA 0.0341925947987  
ACTAATAC -0.0673993552781  
ACTAATAG -0.125853279058  
ACTAATAT 0.210020948446  
ACTAATCA 0.122615563163  
ACTAATCC 0.00751698053716  
ACTAATCG 0.000813163185196  
ACTAATCT 0.142504763717  
ACTAATGA 0.081144938432  
ACTAATGC -0.151492610419  
ACTAATGG 0.0216411427437  
ACTAATTA 0.177297577425  
ACTAATTC 0.100826259279  
ACTAATTG 0.0295898629957  
ACTACAAA 0.0966635233392  
ACTACAAC 0.0338613023072  
ACTACAAG -0.104171380441  
ACTACAAT 0.164988357919  
ACTACACA -0.0503128817968  
ACTACACC -0.0286029831484  
ACTACACG 0.0704449021116  
ACTACACT 0.109966441506  
ACTACAGA -0.0435203038313  
ACTACAGC -0.0909603761109

ACTACAGG -0.0548910451012  
ACTACAGT -0.143604618506  
ACTACATA -0.00775530462837  
ACTACATC -0.0157223339042  
ACTACATG 0.058336702922  
ACTACCAA -0.00282876285549  
ACTACCAC 0.00270104815559  
ACTACCAG -0.248315334868  
ACTACCAT 0.0201331357707  
ACTACCCA -0.0323270293351  
ACTACCCC -0.337398204136  
ACTACCCG 0.020435764449  
ACTACCCT -0.239483912967  
ACTACCGA 0.0846231906838  
ACTACCGC -0.203994972173  
ACTACCGG 0.0925227914717  
ACTACCTA 0.00482976400228  
ACTACCTC -0.238418246489  
ACTACCTG -0.157140178618  
ACTACGAA -0.0354014145676  
ACTACGAC -0.336364087425  
ACTACGAG -0.0281590130075  
ACTACGAT 0.140153865244  
ACTACGCA 0.10154920761  
ACTACGCC -0.193015937424  
ACTACGCG 0.0458819701244  
ACTACGCT -0.0286663192463  
ACTACGGA -0.00915118826328  
ACTACGGC -0.194540237014  
ACTACGGG -0.155317096032  
ACTACGTA -0.200710283865  
ACTACGTC -0.149429303213  
ACTACGTG -0.171579939949  
ACTACTAA 0.0542098572402  
ACTACTAC 0.0322992927162  
ACTACTAG -0.0390073268861  
ACTACTAT 0.0743042123165  
ACTACTCA -0.10147588009  
ACTACTCC -0.126875711004  
ACTACTCG -0.0422046857638  
ACTACTCT 0.0699501154047  
ACTACTGA 0.127964351146  
ACTACTGC -0.0358550137183  
ACTACTGG -0.0710206670251  
ACTACTTA 0.0157186338985  
ACTACTTC -0.0120763778895  
ACTACTTG 0.163296905721  
ACTAGAAA 0.234630628526  
ACTAGAAC 0.0180221543858  
ACTAGAAG 0.0676620219995  
ACTAGAAT 0.240611134551  
ACTAGACA 0.091219318492  
ACTAGACC -0.209203607658  
ACTAGACG -0.209643267744



ACTAGACT -0.00842098348211  
ACTAGAGA -0.053819274664  
ACTAGAGC -0.111123031808  
ACTAGAGG 0.0159153644002  
ACTAGAGT -0.0848910077965  
ACTAGATA 0.17872151153  
ACTAGATC 0.210994741298  
ACTAGATG -0.220603926045  
ACTAGCAA 0.0336656861529  
ACTAGCAC -0.214496689544  
ACTAGCAG -0.0521306430397  
ACTAGCAT -0.094870474678  
ACTAGCCA -0.170789358842  
ACTAGCCC -0.190719191017  
ACTAGCCG -0.216021151362  
ACTAGCCT -0.0275110763998  
ACTAGCGA -0.0376213964257  
ACTAGCGC -0.209123491616  
ACTAGCGG 0.0260791563815  
ACTAGCTA -0.127530609938  
ACTAGCTC 0.0272119220669  
ACTAGCTG -0.204058859403  
ACTAGGAA -0.0150865309519  
ACTAGGAC -0.0472732607449  
ACTAGGAG -0.149488131771  
ACTAGGAT 0.223842543594  
ACTAGGCA -0.0246792565203  
ACTAGGCC -0.161300985524  
ACTAGGCG -0.0103798738809  
ACTAGGCT -0.196745990389  
ACTAGGGA -0.307101484036  
ACTAGGGC -0.103166013348  
ACTAGGGG -0.108012208134  
ACTAGGTA -0.0318944338288  
ACTAGGTC -0.31664309522  
ACTAGGTG -0.248319713465  
ACTAGTAA 0.168055314291  
ACTAGTAC 0.00677399162248  
ACTAGTAG 0.00716991598724  
ACTAGTAT 0.0772327964861  
ACTAGTCA -0.246731174792  
ACTAGTCC -0.156120167509  
ACTAGTCG -0.166160801665  
ACTAGTCT -0.0718181353693  
ACTAGTGA -0.0645379217162  
ACTAGTGC -0.188938578424  
ACTAGTGG 0.0613322336007  
ACTAGTTA 0.0821492960008  
ACTAGTTC -0.0732086636297  
ACTAGTTG 0.039913724517  
ACTATAAA 0.129310307074  
ACTATAAC -0.0983378966728  
ACTATAAG -0.0438888199528  
ACTATAAT 0.193633026966

ACTATACA 0.0535094322973  
ACTATACC 0.0269126304615  
ACTATACG 0.173378612773  
ACTATACT -0.0798734334285  
ACTATAGA -0.0529455559367  
ACTATAGC -0.0749394082272  
ACTATAGG 0.150921512668  
ACTATAGT -0.043700506341  
ACTATATA 0.0634197791289  
ACTATATC 0.154395442274  
ACTATATG -0.105661189901  
ACTATCAA -0.00100800712393  
ACTATCAC 0.000139413005555  
ACTATCAG 0.077558274528  
ACTATCAT 0.229499094225  
ACTATCCA 0.136209211967  
ACTATCCC -0.0551467851205  
ACTATCCG 0.148575578637  
ACTATCCT 0.114391024845  
ACTATCGA 0.158051467851  
ACTATCGC -0.0487724235785  
ACTATCGG 0.0229444320353  
ACTATCTA 0.06345877558  
ACTATCTC 0.140690277054  
ACTATCTG 0.167430515915  
ACTATGAA -0.121361576024  
ACTATGAC -0.0380111789374  
ACTATGAG -0.133538180745  
ACTATGAT 0.173702035722  
ACTATGCA 0.1055421813  
ACTATGCC -0.0478930256071  
ACTATGCG 0.0415084505994  
ACTATGCT 0.125498777014  
ACTATGGA -0.0735655387741  
ACTATGGC -0.205200649881  
ACTATGGG -0.0658606264667  
ACTATGTA 0.0567413143171  
ACTATGTC -0.185121965815  
ACTATGTG 0.0184368225513  
ACTATTAA -0.036382031249  
ACTATTAC 0.0665720817236  
ACTATTAG 0.0486395486395  
ACTATTAT 0.188269536754  
ACTATTCA -0.0488149894528  
ACTATTCC 0.0414778538762  
ACTATTCT -0.0472524866464  
ACTATTCT -0.0339402763645  
ACTATTGA 0.120933848164  
ACTATTGC -0.0230466972743  
ACTATTGG -0.0695495719072  
ACTATTTA 0.0739982406649  
ACTATTTT -0.0105430414467  
ACTATTTG 0.139286730947  
ACTCAAAA 0.116324313294

ACTCAAAC 0.0206031984701  
ACTCAAAG -0.148652870087  
ACTCAAAT 0.18234856171  
ACTCAACA 0.0592330094961  
ACTCAACC -0.112066260215  
ACTCAACG -0.0243513299939  
ACTCAACT -0.0160500135034  
ACTCAAGA -0.0646089597903  
ACTCAAGC -0.149830168056  
ACTCAAGG 0.0384042685197  
ACTCAAGT -0.153374219698  
ACTCAATA 0.114112735325  
ACTCAATC -0.140344128047  
ACTCAATG -0.158539914142  
ACTCACAA -0.0517517725009  
ACTCACAC -0.242860277322  
ACTCACAG -0.114578421884  
ACTCACAT 0.157952718559  
ACTCACCA -0.0573221769538  
ACTCACCC -0.230794359674  
ACTCACCG -0.179056277979  
ACTCACCT -0.10102581019  
ACTCACGA -0.0525240493974  
ACTCACGC -0.189777213453  
ACTCACGG 0.262018159991  
ACTCACTA 0.0863740210068  
ACTCACTC -0.0545140465059  
ACTCACTG -0.173159474951  
ACTCAGAA 0.0690091426974  
ACTCAGAC -0.131100840962  
ACTCAGAG -0.068472223236  
ACTCAGAT 0.2465730193  
ACTCAGCA -0.301491929659  
ACTCAGCC -0.374333076071  
ACTCAGCG -0.102114675304  
ACTCAGCT -0.143208965459  
ACTCAGGA -0.0536489739199  
ACTCAGGC -0.215878193481  
ACTCAGGG -0.267955450799  
ACTCAGTA -0.00958008218798  
ACTCAGTC 0.0289828994068  
ACTCAGTG -0.146467528386  
ACTCATAA 0.0210207075757  
ACTCATAC -0.11135004343  
ACTCATAG -0.213901819196  
ACTCATAT 0.122711911418  
ACTCATCA -0.122192440374  
ACTCATCC -0.146764831589  
ACTCATCG -0.0683922924438  
ACTCATCT -0.129587947738  
ACTCATGA 0.155861550477  
ACTCATGC -0.142571998651  
ACTCATGG -0.145537915422  
ACTCATTAA 0.222157908951

ACTCATTC -0.0311375592446  
ACTCATTG -0.0292964387641  
ACTCCAAA 0.00483265634781  
ACTCCAAC -0.144914983385  
ACTCCAAG -0.172230955957  
ACTCCAAT 0.157437051376  
ACTCCACA 0.0375371342233  
ACTCCACC -0.177252128987  
ACTCCACG -0.177199696971  
ACTCCACT -0.200366415823  
ACTCCAGA -0.0810248944694  
ACTCCAGC -0.259807935083  
ACTCCAGG -0.270146748688  
ACTCCAGT -0.272758220524  
ACTCCATA -0.0159332277395  
ACTCCATC -0.0202876134863  
ACTCCATG -0.244141653982  
ACTCCCAA -0.0929947194992  
ACTCCCAC -0.21510738416  
ACTCCCAG -0.306591150247  
ACTCCCAT -0.114365786347  
ACTCCCCA -0.295550593392  
ACTCCCCC -0.167943270899  
ACTCCCCG -0.168206806875  
ACTCCCCCT -0.180719383936  
ACTCCCCGA -0.0166936850204  
ACTCCCCGC -0.11861414293  
ACTCCCCGG -0.142094954251  
ACTCCCTA -0.00870437920985  
ACTCCCTC -0.242618780386  
ACTCCCTG -0.347942540862  
ACTCCGAA -0.10033189764  
ACTCCGAC -0.230783757482  
ACTCCGAG -0.0266979555192  
ACTCCGAT 0.0187804884775  
ACTCCGCA -0.144370283988  
ACTCCGCC -0.265178794279  
ACTCCGCG 0.0517004607914  
ACTCCGCT -0.151480986887  
ACTCCGGA -0.157269144169  
ACTCCGGC -0.31169876433  
ACTCCGGG -0.158381256016  
ACTCCGTA 0.0522630068085  
ACTCCGTC -0.234249666812  
ACTCCGTG -0.135873236446  
ACTCCTAA -0.175217641951  
ACTCCTAC -0.255717636811  
ACTCCTAG -0.230631710982  
ACTCCTAT -0.132519571914  
ACTCCTCA -0.117097720852  
ACTCCTCC -0.156420728138  
ACTCCTCG -0.122838142974  
ACTCCTCT 0.0846397361549  
ACTCCTGA -0.0534241589531

ACTCCTGC -0.169140087368  
ACTCCTGG -0.206425298949  
ACTCCTTA 0.0247971313001  
ACTCCTTC -0.194016844873  
ACTCCTTG -0.146158292114  
ACTCGAAA 0.0353357225754  
ACTCGAAC -0.11023566684  
ACTCGAAG -0.079469276439  
ACTCGAAT 0.103984149439  
ACTCGACA -0.115172544641  
ACTCGACC -0.10355196003  
ACTCGACG -0.07525129497  
ACTCGACT -0.133683528422  
ACTCGAGA -0.0815955522925  
ACTCGAGC -0.239287929537  
ACTCGAGG 0.0639307168456  
ACTCGAGT -0.234301913732  
ACTCGATA 0.115367433549  
ACTCGATC -0.0305093874477  
ACTCGATG -0.26965361342  
ACTCGCAA 0.131062093531  
ACTCGCAC -0.0532754908205  
ACTCGCAG -0.0348262446808  
ACTCGCAT 0.0554403918162  
ACTCGCCA -0.226363083869  
ACTCGCCC -0.150090839667  
ACTCGCCG -0.128624016044  
ACTCGCCT -0.300984113226  
ACTCGCGA 0.12980664657  
ACTCGCGC -0.166725945778  
ACTCGCGG -0.0540058649828  
ACTCGCTA 0.0852090830128  
ACTCGCTC -0.0848981409166  
ACTCGCTG -0.129064006815  
ACTCGGAA -0.0834879528186  
ACTCGGAC -0.364396960689  
ACTCGGAG -0.241977382414  
ACTCGGAT 0.280185835347  
ACTCGGCA -0.182912233946  
ACTCGGCC -0.0142807091816  
ACTCGGCG -0.0328885431248  
ACTCGGCT -0.0876974574893  
ACTCGGGA -0.120197718054  
ACTCGGGC -0.184528196155  
ACTCGGGG -0.00361932180114  
ACTCGGTA 0.0414712426897  
ACTCGGTC -0.184116669318  
ACTCGGTG -0.1434857112  
ACTCGTAA 0.290524295088  
ACTCGTAC -0.111112489764  
ACTCGTAG 0.0255490755677  
ACTCGTAT 0.0275082512346  
ACTCGTCA -0.184763332394  
ACTCGTCC -0.0644019289147

ACTCGTCG -0.112110534892  
ACTCGTCT -0.0583137310731  
ACTCGTGA -0.0774521238627  
ACTCGTGC -0.237052124276  
ACTCGTGG -0.10546327974  
ACTCGTTA 0.00452741336751  
ACTCGTTC -0.133799774345  
ACTCGTTG -0.0655233826996  
ACTCTAAA 0.0962540966256  
ACTCTAAC 0.112361672968  
ACTCTAAG -0.24650236392  
ACTCTAAT 0.0881812807019  
ACTCTACA 0.0687340232795  
ACTCTACC 0.00659739866158  
ACTCTACG -0.0600760527034  
ACTCTACT 0.00553199564973  
ACTCTAGA -0.0539382349292  
ACTCTAGC -0.10387550429  
ACTCTAGG 0.0071959011353  
ACTCTATA 0.0753604844514  
ACTCTATC -0.157173884169  
ACTCTATG -0.229807822804  
ACTCTCAA -0.234247437902  
ACTCTCAC -0.086736131284  
ACTCTCAG -0.297286235209  
ACTCTCAT 0.0322760777306  
ACTCTCCA -0.0657394363627  
ACTCTCCC -0.23895097577  
ACTCTCCG -0.15200006421  
ACTCTCCT -0.180801320454  
ACTCTCGA -0.139504426633  
ACTCTCGC -0.0987137963297  
ACTCTCGG -0.160729481242  
ACTCTCTA -0.0070332040029  
ACTCTCTC -0.0952447918821  
ACTCTCTG -0.12975606837  
ACTCTGAA -0.152065267684  
ACTCTGAC -0.141985741077  
ACTCTGAG -0.0987369465978  
ACTCTGAT 0.153245549368  
ACTCTGCA -0.0481788338055  
ACTCTGCC 0.160570936403  
ACTCTGCG 0.0437011530589  
ACTCTGCT 0.0903975600945  
ACTCTGGA -0.238855399271  
ACTCTGGC -0.280157657099  
ACTCTGGG 0.0084460437606  
ACTCTGTA -0.24356537821  
ACTCTGTC -0.184113672266  
ACTCTGTG -0.0405082303896  
ACTCTTAA -0.0497698818975  
ACTCTTAC -0.00427779618684  
ACTCTTAG -0.167534346948  
ACTCTTAT 0.24812020746

ACTCTTCA -0.224350188225  
ACTCTTCC -0.253161721586  
ACTCTTCG -0.00780532598714  
ACTCTTCT -0.0445361887094  
ACTCTTGA -0.129304770371  
ACTCTTGC -0.101257882445  
ACTCTTGG 0.00106785982789  
ACTCTTTA 0.16398400035  
ACTCTTTC -0.177126536029  
ACTCTTTG -0.125451898179  
ACTGAAAA 0.289079071261  
ACTGAAAC 0.0950336853938  
ACTGAAAG -0.0763180606221  
ACTGAAAT 0.29056808975  
ACTGAACA -0.0415911779548  
ACTGAACC -0.0269638861277  
ACTGAACG -0.0446931819011  
ACTGAACT -0.0737801362014  
ACTGAAGA -0.0322510374874  
ACTGAAGC -0.159864733341  
ACTGAAGG -0.088258648952  
ACTGAAGT -0.316128133176  
ACTGAATA 0.209351224503  
ACTGAATC 0.146153040092  
ACTGAATG -0.0793644884554  
ACTGACAA 0.0465465465465  
ACTGACAC -0.127388289145  
ACTGACAG -0.340991894711  
ACTGACAT -0.0583664882779  
ACTGACCA -0.06812632003  
ACTGACCC -0.286599272458  
ACTGACCG -0.309219420534  
ACTGACCT -0.32426921107  
ACTGACGA 0.0904766507866  
ACTGACGC -0.109146726439  
ACTGACGG 0.0650372619578  
ACTGACTA -0.216334702131  
ACTGACTC -0.224725285488  
ACTGACTG -0.0867699237102  
ACTGAGAA 0.14763691306  
ACTGAGAC -0.0144668483568  
ACTGAGAG -0.102187044251  
ACTGAGAT 0.232741618797  
ACTGAGCA -0.295758808596  
ACTGAGCC -0.253559634179  
ACTGAGCG -0.013253706323  
ACTGAGCT -0.144994737603  
ACTGAGGA 0.0079081934285  
ACTGAGGC -0.150066919555  
ACTGAGGG -0.171008017609  
ACTGAGTA -0.00596556279789  
ACTGAGTC -0.270381696134  
ACTGAGTG 0.0265521152501  
ACTGATAA 0.0429618329526

ACTGATAC 0.236064173777  
ACTGATAG 0.0202207250936  
ACTGATAT 0.335114896891  
ACTGATCA 0.111360335175  
ACTGATCC -0.0567328452662  
ACTGATCG 0.166352302716  
ACTGATCT 0.0286971492915  
ACTGATGA 0.0517710992683  
ACTGATGC -0.152498228256  
ACTGATGG -0.125433706573  
ACTGATTA 0.272294037357  
ACTGATTC 0.231497337558  
ACTGATTG 0.181099089262  
ACTGCAAA 0.018702510164  
ACTGCAAC -0.038517203589  
ACTGCAAG -0.054639572511  
ACTGCAAT 0.166442420862  
ACTGCACA -0.0813474194919  
ACTGCACC -0.304597717923  
ACTGCACG -0.0179890634436  
ACTGCACT -0.118441853031  
ACTGCAGA 0.000875163317592  
ACTGCAGC -0.225052097546  
ACTGCAGG -0.132652864284  
ACTGCAGT -0.270764613973  
ACTGCATA 0.0505670960216  
ACTGCATC -0.0640778980774  
ACTGCATG -0.202618838767  
ACTGCCAA -0.183876054909  
ACTGCCAC -0.0864531167669  
ACTGCCAG -0.259053431579  
ACTGCCAT -0.147387591577  
ACTGCCCA -0.240650231694  
ACTGCCCC -0.263270838039  
ACTGCCCG -0.26633018057  
ACTGCCCT -0.210164346625  
ACTGCCGA 0.0437393316181  
ACTGCCGC -0.222253921788  
ACTGCCGG -0.0554593695029  
ACTGCCTA -0.112262114483  
ACTGCCTC -0.281982968104  
ACTGCCTG -0.260747596558  
ACTGCGAA 0.0473617366043  
ACTGCGAC -0.170395285127  
ACTGCGAG -0.243955119988  
ACTGCGAT 0.173137084589  
ACTGCGCA -0.199605429685  
ACTGCGCC 0.119441910031  
ACTGCGCG -0.0014105014105  
ACTGCGCT -0.0568497654912  
ACTGCGGA -0.145717646475  
ACTGCGGC -0.141511691882  
ACTGCGGG 0.113908674515  
ACTGCGTA 0.0172648639408



ACTGCGTC -0.14225282223  
ACTGCGTG -0.367474520504  
ACTGCTAA 0.0687860849762  
ACTGCTAC -0.164538449875  
ACTGCTAG -0.215663317744  
ACTGCTAT 0.0137009832417  
ACTGCTCA 0.0019027835965  
ACTGCTCC 0.00033773631203  
ACTGCTCG 0.0460989094318  
ACTGCTCT 0.059561919415  
ACTGCTGA -0.0319863230894  
ACTGCTGC -0.209682597826  
ACTGCTGG -0.111585391074  
ACTGCTTA 0.0481514572424  
ACTGCTTC -0.195463269044  
ACTGCTTG -0.0369253551072  
ACTGAAA 0.143464741648  
ACTGGAAC -0.0310186219277  
ACTGGAAG -0.0247457328051  
ACTGGAAT 0.267237213784  
ACTGGACA -0.0804485031971  
ACTGGACC -0.244063282179  
ACTGGACG -0.116874083049  
ACTGGACT -0.20879685919  
ACTGGAGA 0.135292657825  
ACTGGAGC -0.152787084143  
ACTGGAGG -0.0342797879965  
ACTGGATA 0.268837708232  
ACTGGATC 0.132276905004  
ACTGGATG -0.18248808155  
ACTGGCAA 0.133505835639  
ACTGGCAC -0.40655577228  
ACTGGCAG -0.174144000353  
ACTGGCAT -0.179894179894  
ACTGGCCA -0.247741962789  
ACTGGCCC -0.187335538559  
ACTGGCCG -0.111461718808  
ACTGGCCT -0.237725824832  
ACTGGCGA 0.0844879309212  
ACTGGCGC -0.16082659151  
ACTGGCGG -0.0258679392491  
ACTGGCTA -0.169850842578  
ACTGGCTC -0.305640330055  
ACTGGCTG -0.238442409856  
ACTGGGAA -0.0438793665899  
ACTGGGAC -0.258932244629  
ACTGGGAG -0.180588979582  
ACTGGGAT 0.209858150377  
ACTGGGCA -0.320307723734  
ACTGGGCC -0.121709664701  
ACTGGGCG -0.324397156962  
ACTGGGCT -0.354197852486  
ACTGGGGA -0.162445976381  
ACTGGGGC -0.123727898305

ACTGGGGG -0.0842478519334  
ACTGGGTA 0.0312943797792  
ACTGGGTC -0.371291726261  
ACTGGGTG -0.24291652497  
ACTGGTAA 0.0951154354284  
ACTGGTAC -0.33517532351  
ACTGGTAG -0.237035658658  
ACTGGTAT -0.0108525083607  
ACTGGTCA -0.149173685801  
ACTGGTCC -0.327547703531  
ACTGGTCG -0.240821597603  
ACTGGTCT -0.328337054956  
ACTGGTGA -0.0848854509142  
ACTGGTGC -0.210950352001  
ACTGGTGG -0.290513126881  
ACTGGTTA -0.138362933  
ACTGGTTC -0.202633602887  
ACTGGTTG -0.0875655269595  
ACTGTAAG 0.200491230119  
ACTGTAAC -0.0743991007496  
ACTGTAAG -0.101922007482  
ACTGTAAT 0.269146661022  
ACTGTACA -0.0250546284173  
ACTGTACC -0.196137539497  
ACTGTACG 0.069083888674  
ACTGTACT -0.0712737530919  
ACTGTAGA -0.00295155376217  
ACTGTAGC 0.0257654348563  
ACTGTAGG 0.00278015425709  
ACTGTATA 0.0932737144858  
ACTGTATC -0.137665628644  
ACTGTATG -0.182459552346  
ACTGTCAA -0.0264658438136  
ACTGTCAC -0.18956478207  
ACTGTCAG -0.157755735597  
ACTGTCAT -0.0911384478855  
ACTGTCCA -0.0632714900563  
ACTGTCCC -0.0801781307303  
ACTGTCCG 0.0224910918781  
ACTGTCCT -0.00602608961792  
ACTGTCGA -0.162406630767  
ACTGTCGC 0.0170999400415  
ACTGTCGG -0.0712418625042  
ACTGTCTA 0.155744764713  
ACTGTCTC -0.150154248236  
ACTGTCTG 0.0193535907973  
ACTGTGAA 0.129587673263  
ACTGTGAC -0.00387144807048  
ACTGTGAG -0.262569233127  
ACTGTGAT 0.250662508238  
ACTGTGCA -0.0885374023074  
ACTGTGCC -0.103526171121  
ACTGTGCG -0.0376983518785  
ACTGTGCT -0.0807599164439

ACTGTGGA -0.148283715634  
ACTGTGGC -0.133699815518  
ACTGTGGG -0.183217670115  
ACTGTGTA -0.0257069202349  
ACTGTGTC -0.200765870762  
ACTGTGTG -0.0295796442414  
ACTGTTAA 0.174611504858  
ACTGTTAC -0.00686518734104  
ACTGTTAG -0.0275709291037  
ACTGTTAT 0.188351490185  
ACTGTTCA -0.129961625088  
ACTGTTCC -0.0150193791377  
ACTGTTCCG 0.0195296324502  
ACTGTTCT 0.025835200689  
ACTGTTGA -0.0150191513828  
ACTGTTGC -0.213057395965  
ACTGTTGG -0.0969337535257  
ACTGTTTA 0.0438961190631  
ACTGTTTC -0.176604142066  
ACTGTTTG -0.0416656325747  
ACTTAAAA 0.100597843022  
ACTTAAAC 0.118256534528  
ACTTAAAG -0.0850750013095  
ACTTAAAT 0.126011686618  
ACTTAAACA 0.157489445368  
ACTTAAACC -0.0448143471311  
ACTTAAACG 0.0288687109041  
ACTTAACT -0.063185775307  
ACTTAAAGA -0.0370510134815  
ACTTAAAGC -0.0318763739816  
ACTTAAAGG -0.107689376964  
ACTTAAAGT -0.2302468064  
ACTTAAATA 0.198412443523  
ACTTAAATC 0.0170777282249  
ACTTAAATG 0.0894048318291  
ACTTACAA 0.119854013793  
ACTTACAC 0.0433764224141  
ACTTACAG -0.126139800867  
ACTTACAT 0.0677875666956  
ACTTACCA -0.107830663502  
ACTTACCC -0.24797811903  
ACTTACCG -0.15029760674  
ACTTACCT -0.038156686482  
ACTTACGA 0.199704692657  
ACTTACGC -0.0310210325148  
ACTTACGG 0.0166240620786  
ACTTACTA 0.0616592337394  
ACTTACTC -0.0461384484313  
ACTTACTG -0.00271759362668  
ACTTAGAA 0.000694110932211  
ACTTAGAC -0.0103683860937  
ACTTAGAG -0.195789186373  
ACTTAGAT 0.17377940629  
ACTTAGCA -0.0477151204625

ACTTAGCC -0.228312791436  
ACTTAGCG 0.00297129085008  
ACTTAGCT -0.0465481301338  
ACTTAGGA 0.010877268453  
ACTTAGGC -0.0661482676373  
ACTTAGGG -0.107530812846  
ACTTAGTA -0.0207448012087  
ACTTAGTC -0.128719800453  
ACTTAGTG -0.0226071419709  
ACTTATAA 0.135486726396  
ACTTATAC 0.106585772714  
ACTTATAG 0.121666678832  
ACTTATAT 0.0685685685686  
ACTTATCA -0.0827094311943  
ACTTATCC 0.0857510402965  
ACTTATCG 0.0658385658386  
ACTTATCT 0.111823980542  
ACTTATGA 0.221471792588  
ACTTATGC -0.0884286490347  
ACTTATGG -0.141476186931  
ACTTATTA 0.115640533419  
ACTTATTC -0.110640642906  
ACTTATTG 0.216995232147  
ACTTCAAA 0.0739655985505  
ACTTCAAC 0.0191800665029  
ACTTCAAG -0.220605223471  
ACTTCAAT 0.144539170675  
ACTTCACA 0.0153215623016  
ACTTCACC -0.03963781815  
ACTTCACG -0.211041543525  
ACTTCACT -0.0441734013836  
ACTTCAGA 0.0103932030685  
ACTTCAGC -0.0872471417291  
ACTTCAGG -0.121478062593  
ACTTCATA 0.0868044352893  
ACTTCATC -0.20990568447  
ACTTCATG -0.208430443406  
ACTTCCAA -0.015273388174  
ACTTCCAC -0.145990985403  
ACTTCCAG -0.245292380976  
ACTTCCAT -0.125415804892  
ACTTCCCA -0.0863659803054  
ACTTCCCC -0.203805703731  
ACTTCCCG -0.218940951725  
ACTTCCCT -0.0606576948422  
ACTTCCGA 0.146994591359  
ACTTCCGC -0.150933253943  
ACTTCCGG -0.0337179964429  
ACTTCCTA -0.0913359561469  
ACTTCCTC -0.243617845494  
ACTTCCTG -0.0576716819552  
ACTTCGAA 0.0656095122005  
ACTTCGAC -0.131205351112  
ACTTCGAG -0.147367448836

ACTTCGAT 0.147713829532  
ACTTCGCA 0.131605147333  
ACTTCGCC -0.149010668652  
ACTTCGCG 0.0257158621656  
ACTTCGCT 0.0942140487595  
ACTTCGGA -0.169773840737  
ACTTCGGC -0.0213043154577  
ACTTCGGG -0.106286067203  
ACTTCGTA -0.0281369345521  
ACTTCGTC -0.257088583393  
ACTTCGTG -0.124455749955  
ACTTCTAA 0.0980029616393  
ACTTCTAC -0.0572261506017  
ACTTCTAG -0.116226274656  
ACTTCTAT -0.0329491110069  
ACTTCTCA 0.0465383969694  
ACTTCTCC -0.12834032206  
ACTTCTCG 0.161140267001  
ACTTCTCT 0.153893710357  
ACTTCTGA 0.136253220732  
ACTTCTGC -0.189223804056  
ACTTCTGG -0.0728633679554  
ACTTCTTA -0.0167970272247  
ACTTCTTC -0.130960981341  
ACTTCTTG -0.0613186043808  
ACTTGAAA 0.170573637074  
ACTTG AAC 0.0971949911344  
ACTTG AAG -0.000584600698018  
ACTTG AAT 0.107675744327  
ACTTG ACA 0.0202116717268  
ACTTG ACC -0.251732571765  
ACTTG ACG -0.0835118776799  
ACTTG ACT -0.0324495732859  
ACTTG AGA 0.0730952060601  
ACTTG AGC -0.192801536824  
ACTTG AGG 0.0605440150895  
ACTTG ATA 0.10529951439  
ACTTG ATC -0.087855778059  
ACTTG ATG -0.24389191919  
ACTTG CAA -0.0769788279679  
ACTTG CAC -0.101762469222  
ACTTG CAG -0.18457237759  
ACTTG CAT 0.109140821262  
ACTTG CCA -0.219418843086  
ACTTG CCC -0.264904997781  
ACTTG CCG -0.14199414929  
ACTTG CCT -0.101656898024  
ACTTG CGA 0.292464640949  
ACTTG CGC -0.0219820371336  
ACTTG CGG -0.0150910737772  
ACTTG CTA -0.0282804026189  
ACTTG CTC -0.0988091953822  
ACTTG CTG 0.0778223834515  
ACTTG GAA 0.0132542333471

ACTTGGAC -0.175255467314  
ACTTGGAG -0.182902245379  
ACTTGGAT 0.231524127209  
ACTTGGCA -0.168635089199  
ACTTGGCC -0.0102788739152  
ACTTGGCG -0.215963625438  
ACTTGGCT 0.0773756779049  
ACTTGGGA 0.0526375334847  
ACTTGGGC -0.186085681285  
ACTTGGGG -0.154234952536  
ACTTGGTA -0.0926656575432  
ACTTGGTC -0.0710250949838  
ACTTGGTG -0.0711117351637  
ACTTGTA 0.249275563309  
ACTTGTAC -0.0205729145123  
ACTTGTAG -0.10773900845  
ACTTGTAT 0.0630368660672  
ACTTGTCA -0.259799665233  
ACTTGTCC -0.0599649236013  
ACTTGTCCG -0.123461232007  
ACTTGTCT -0.0367739171214  
ACTTGTGA 0.0263858900223  
ACTTGTGC -0.247324950996  
ACTTGTGG -0.140129048269  
ACTTGTTA -0.0774617592799  
ACTTG TTC -0.179419947007  
ACTTGTTG -0.12195383625  
ACTTTAAA 0.0858660029342  
ACTTTAAC 0.080163938016  
ACTTTAAG 0.0724237749321  
ACTTTAAT 0.0218761632957  
ACTTTACA 0.134523070813  
ACTTTACC -0.10298217314  
ACTTTACG 0.20983986237  
ACTTTACT 0.0805363922873  
ACTTTAGA 0.128146052388  
ACTTTAGC -0.0209939793267  
ACTTTAGG -0.081879228922  
ACTTTATA 0.0743217301811  
ACTTTATC -0.131468018648  
ACTTTATG 0.0385706882331  
ACTTTCAA -0.168528032164  
ACTTTCAC -0.100733130957  
ACTTTCAG -0.10888078362  
ACTTT CAT 0.00552031707335  
ACTTTCCA -0.00742753773057  
ACTTTCCC 0.0932176667664  
ACTTTCCG -0.0898726464125  
ACTTT CCT -0.164722539265  
ACTTT CGA -0.00901075158938  
ACTTT CGC -0.0752068667918  
ACTTT CGG -0.167267699451  
ACTTTCTA 0.0580534732816  
ACTTTCTC -0.135538163555

ACTTTCTG 0.120121498909  
ACTTTGAA 0.106201324059  
ACTTTGAC -0.0677799011132  
ACTTTGAG -0.0776796079826  
ACTTTGAT -0.0638963855809  
ACTTTGCA -0.101004210404  
ACTTTGCC 0.180322328708  
ACTTTGCG -0.0428554096941  
ACTTTGCT 0.0652620745531  
ACTTTGGA 0.0379594470504  
ACTTTGGC 0.00398166463508  
ACTTTGGG -0.14295899736  
ACTTTGTA -0.0112605718666  
ACTTTGTC 0.0146434780578  
ACTTTGTG -0.110742830449  
ACTTTTAA 0.104924063826  
ACTTTTAC -0.0413292079959  
ACTTTTAG -0.161697925653  
ACTTTTAT 0.17862076953  
ACTTTTCA -0.0340082880468  
ACTTTTCC -0.148105308173  
ACTTTTCG 0.0731075428045  
ACTTTTCT 0.00653683987017  
ACTTTTGA -0.0362200517551  
ACTTTTGC -0.0816422596432  
ACTTTTGG -0.230941048192  
ACTTTTTA 0.0449793070225  
ACTTTTTC -0.0853950443041  
ACTTTTTG 0.135053786569  
AGAAAAAA 0.0292862200098  
AGAAAAAC 0.0840575601969  
AGAAAAAG -0.166254530698  
AGAAAAAT 0.276878472272  
AGAAAACA -0.0462245352292  
AGAAAACC -0.145638790325  
AGAAAACG -0.0884063366009  
AGAAAACT -0.246892907643  
AGAAAAGA 0.143781522569  
AGAAAAGC -0.0807264419705  
AGAAAAGG 0.105142332415  
AGAAAATA 0.204102829865  
AGAAAATC 0.480499697087  
AGAAAATG 0.18541418801  
AGAAACAA -0.0528067955303  
AGAAACAC -0.01741640694  
AGAAACAG 0.0117017844291  
AGAAACAT 0.0627044663256  
AGAAACCA -0.0779172718846  
AGAAACCC -0.218179838525  
AGAAACCG 0.0202178054495  
AGAAACCT -0.132106608432  
AGAAACGA 0.00455391487778  
AGAAACGC -0.058180770302  
AGAAACGG -0.055716606601

AGAAACTA 0.0384539024693  
AGAAACTC -0.165261553866  
AGAAACTG -0.0944144141514  
AGAAAGAA -0.0379093077443  
AGAAAGAC -0.00102444041838  
AGAAAGAG -0.237198668309  
AGAAAGAT 0.166813135479  
AGAAAGCA -0.0581904360126  
AGAAAGCC -0.239325475408  
AGAAAGCG -0.115210251574  
AGAAAGCT -0.0229724896535  
AGAAAGGA 0.0218386430508  
AGAAAGGC -0.18024986973  
AGAAAGGG -0.264576009759  
AGAAAGTA 0.0653263067232  
AGAAAGTC -0.280216250517  
AGAAAGTG 0.229875680738  
AGAAATAA 0.141716096262  
AGAAATAC 0.104361937695  
AGAAATAG -0.0125125125125  
AGAAATAT 0.360677503412  
AGAAATCA 0.381427413998  
AGAAATCC 0.469968540835  
AGAAATCG 0.381459972369  
AGAAATCT 0.469928606292  
AGAAATGA -0.0541426100158  
AGAAATGC -0.00948037239608  
AGAAATGG -0.131928419996  
AGAAATTA 0.10972722083  
AGAAATTC 0.0459165127771  
AGAAATTG 0.16861075952  
AGAACAAA 0.0468420399553  
AGAACAAC 0.0595687685671  
AGAACAAG -0.0623440399478  
AGAACAAT 0.260335175142  
AGAACACA -0.187781233626  
AGAACACC -0.288524463631  
AGAACACG -0.16916827961  
AGAACACT 0.00128089522029  
AGAACAGA 0.149477300992  
AGAACAGC -0.10633764884  
AGAACAGG -0.0612956153501  
AGAACATA 0.0590955902424  
AGAACATC -0.0588082028017  
AGAACATG 0.0947462614129  
AGAACCAA -0.143051006228  
AGAACCAC -0.157407637183  
AGAACCAG -0.232504344942  
AGAACCAT -0.165452762083  
AGAACCCA -0.129297197107  
AGAACCCC -0.21698687994  
AGAACCCG -0.133836411702  
AGAACCCT -0.239903592866  
AGAACCGA 0.0861054137501



AGAACCGC -0.0455989279599  
AGAACCGG -0.174283587644  
AGAACCTA -0.100318162248  
AGAACCTC -0.263411891762  
AGAACCTG -0.0450456828636  
AGAACGAA -0.0393478878327  
AGAACGAC -0.101649727113  
AGAACGAG -0.20904599095  
AGAACGAT -0.00482738080465  
AGAACGCA -0.281965292423  
AGAACGCC -0.25354685231  
AGAACGCG -0.124306916907  
AGAACGCT -0.150401318315  
AGAACGGA 0.14078954988  
AGAACGGC -0.114095287024  
AGAACGGG -0.0906830512161  
AGAACGTA 0.0778165441633  
AGAACGTC -0.188461419179  
AGAACGTG 0.140613064855  
AGAATAA 0.146968305577  
AGAATAAC -0.00711599429937  
AGAATAAG -0.161212717793  
AGAATAAT -0.069911607775  
AGAATACA -0.152137770168  
AGAATACC -0.309509832293  
AGAATACT -0.171039573254  
AGAATACTA -0.029138777983  
AGAATACTG 0.0822985519955  
AGAATACTC -0.120286055353  
AGAATACTG -0.020683328541  
AGAATACTTA 0.00306258809268  
AGAATACTT -0.258771821016  
AGAATACTTG -0.0295095727831  
AGAAGAAA -0.0938567540965  
AGAAGAAC -0.157350934419  
AGAAGAAG -0.050756684251  
AGAAGAAT 0.170845163975  
AGAAGACA -0.140069470289  
AGAAGACC -0.25842450404  
AGAAGACG -0.0664585314753  
AGAAGACT -0.242375795184  
AGAAGAGA -0.0336204316694  
AGAAGAGC 0.0420421450625  
AGAAGAGG -0.120665951531  
AGAAGATA 0.249307679394  
AGAAGATC 0.363416129574  
AGAAGATG -0.0681558770254  
AGAAGCAA -0.118888861313  
AGAAGCAC -0.0483875859977  
AGAAGCAG -0.0719408392684  
AGAAGCAT -0.0710509988832  
AGAAGCCA -0.117078571001  
AGAAGCCC -0.33442703568  
AGAAGCCG -0.301963346095

AGAAGCCT -0.190551301796  
AGAAGCGA -0.00262840959687  
AGAAGCGC -0.181981052352  
AGAAGCGG -0.0761623178817  
AGAAGCTA -0.217344792123  
AGAAGCTC -0.352306981418  
AGAAGCTG -0.016285044853  
AGAAGGAA -0.0308672072874  
AGAAGGAC -0.104909622949  
AGAAGGAG -0.274554310822  
AGAAGGAT 0.0568593388466  
AGAAGGCA -0.251293415913  
AGAAGGCC -0.20913581472  
AGAAGGCG -0.23928739796  
AGAAGGCT -0.355857328172  
AGAAGGGA 0.0325925590724  
AGAAGGGC -0.347782024174  
AGAAGGGG -0.249854588257  
AGAAGGTA 0.0532096106091  
AGAAGGTC -0.373184425195  
AGAAGGTG 0.147709506911  
AGAAGTAA 0.161407797106  
AGAAGTAC -0.143390654855  
AGAAGTAG -0.0901007615136  
AGAAGTAT 0.182605470484  
AGAAGTCA -0.17502268884  
AGAAGTCC -0.174715500671  
AGAAGTCG -0.111295446085  
AGAAGTCT 0.103859769494  
AGAAGTGA -0.147331783156  
AGAAGTGC -0.084686995068  
AGAAGTGG -0.27175486037  
AGAAGTTA 0.130335102151  
AGAAGTTC -0.170923911061  
AGAAGTTG 0.0900148171938  
AGAATAAA 0.169005093248  
AGAATAAC 0.123729407385  
AGAATAAG -0.242531926788  
AGAATAAT 0.165548924238  
AGAATACA 0.0541243723062  
AGAATACC -0.0325193428335  
AGAATACG 0.200204695054  
AGAATACT -0.0714943593731  
AGAATAGA 0.18716374777  
AGAATAGC -0.0617496574434  
AGAATAGG -0.185507282336  
AGAATATA 0.244291123079  
AGAATATC 0.436970027879  
AGAATATG 0.217225604778  
AGAATCAA 0.31233575173  
AGAATCAC 0.411523105333  
AGAATCAG 0.379444182474  
AGAATCAT 0.335956876857  
AGAATCCA 0.474435596301

AGAATCCC 0.439375139589  
AGAATCCG 0.475123884215  
AGAATCCT 0.443323488778  
AGAATCGA 0.34971132019  
AGAATCGC 0.370172186011  
AGAATCGG 0.378519448479  
AGAATCTA 0.485947752969  
AGAATCTC 0.478339160456  
AGAATCTG 0.476342733918  
AGAATGAA 0.00498432316614  
AGAATGAC -0.131919116735  
AGAATGAG -0.0596533172291  
AGAATGAT 0.158307067398  
AGAATGCA -0.0479860025315  
AGAATGCC -0.348074355626  
AGAATGCG -0.247069769478  
AGAATGCT -0.24380901184  
AGAATGGA -0.0455426568752  
AGAATGGC 0.254948431786  
AGAATGGG -0.0961324313871  
AGAATGTA 0.197758443246  
AGAATGTC -0.199039498025  
AGAATGTG 0.105310837343  
AGAATTAA -0.128688786614  
AGAATTAC 0.243354925173  
AGAATTAG 0.0237464765294  
AGAATTAT 0.0741774832684  
AGAATTCA 0.0491692672649  
AGAATTCC 0.0681339309157  
AGAATTCG 0.179833288322  
AGAATTCT 0.352429737306  
AGAATTGA -0.0165917946936  
AGAATTGC 0.0843501904108  
AGAATTGG -0.0888415044311  
AGAATTTA 0.220267637789  
AGAATTTT 0.278647182908  
AGAATTTG 0.242500075833  
AGACAAAA 0.0455055039858  
AGACAAAC 0.145695349737  
AGACAAAG -0.138492565666  
AGACAAAT 0.192514331092  
AGACAACA -0.0726181178514  
AGACAACC -0.145865213088  
AGACAACG -0.212368825821  
AGACAAC T -0.155053475272  
AGACAAGA 0.119809892537  
AGACAAGC -0.21431281585  
AGACAAGG -0.128816040896  
AGACAATA -0.0792137979132  
AGACAATC 0.319144213084  
AGACAATG 0.0673189071147  
AGACACAA 0.076674963322  
AGACACAC -0.119405495581  
AGACACAG -0.133016227544

AGACACAT 0.0135639365561  
AGACACCA -0.075388848908  
AGACACCC -0.230430467684  
AGACACCG 0.0411512823159  
AGACACCT 0.0311240509803  
AGACACGA 0.0346586255677  
AGACACGC -0.295258158341  
AGACACGG -0.228385565288  
AGACACTA -0.106964502841  
AGACACTC -0.114169003251  
AGACACTG 0.0350364590556  
AGACAGAA -0.137262768389  
AGACAGAC -0.041491414179  
AGACAGAG -0.0848893819843  
AGACAGAT 0.288039677963  
AGACAGCA -0.096298768564  
AGACAGCC -0.294716371585  
AGACAGCG -0.162364938532  
AGACAGCT -0.0880584299031  
AGACAGGA 0.00678539031848  
AGACAGGC -0.115437837459  
AGACAGGG -0.136598371617  
AGACAGTA 0.186377670562  
AGACAGTC -0.22498187342  
AGACAGTG 0.214958066612  
AGACATAA -0.220263838147  
AGACATAC -0.022252797384  
AGACATAG -0.029934202362  
AGACATAT 0.11336029138  
AGACATCA 0.0174929092663  
AGACATCC -0.0931999024887  
AGACATCG -0.0178153359972  
AGACATCT 0.176091764414  
AGACATGA -0.0644165942838  
AGACATGC -0.160658635523  
AGACATGG -0.0533384624294  
AGACATTA -0.0205900600717  
AGACATTC -0.0752588548345  
AGACATTG 0.0386928516098  
AGACCAAA -0.0712637403538  
AGACCAAC 0.00674948723751  
AGACCAAG -0.0990262942358  
AGACCAAT 0.135596300811  
AGACCACA -0.127238364639  
AGACCACC -0.358763392402  
AGACCACG -0.303756349935  
AGACCACT -0.164932579949  
AGACCAGA -0.098402810524  
AGACCAGC -0.150443478883  
AGACCAGG -0.240698466264  
AGACCATA -0.107206812759  
AGACCATC -0.190356345367  
AGACCATG -0.0899269759764  
AGACCCAA -0.191611797693

AGACCCAC -0.203217063561  
AGACCCAG -0.355128357445  
AGACCCAT -0.234670322374  
AGACCCCA -0.245841456297  
AGACCCCC -0.368818233412  
AGACCCCG -0.257044159596  
AGACCCCT -0.200850222013  
AGACCCGA -0.155896015107  
AGACCCGC -0.412983782128  
AGACCCGG -0.197178051759  
AGACCCTA -0.352773436316  
AGACCCTC -0.28791129403  
AGACCCTG -0.103166530214  
AGACCGAA -0.0825660371115  
AGACCGAC -0.207007819879  
AGACCGAG -0.251248108457  
AGACCGAT -0.0539357193865  
AGACCGCA -0.159196896297  
AGACCGCC -0.376334759703  
AGACCGCG -0.275189439359  
AGACCGCT -0.0977015772192  
AGACCGGA 0.0584768216754  
AGACCGGC -0.389659740673  
AGACCGGG -0.182429701147  
AGACCGTA -0.0153927516812  
AGACCGTC -0.282463975346  
AGACCGTG -0.0735699968846  
AGACCTAA -0.168185291371  
AGACCTAC -0.120745223571  
AGACCTAG -0.266344774444  
AGACCTAT -0.0374013707729  
AGACCTCA -0.353526709057  
AGACCTCC -0.334065034601  
AGACCTCG -0.0900466635626  
AGACCTCT -0.00983701086838  
AGACCTGA -0.124299369467  
AGACCTGC -0.188162204412  
AGACCTGG -0.256617300489  
AGACCTTA -0.179689586675  
AGACCTTC -0.183792701382  
AGACCTTG -0.157852504446  
AGACGAAA -0.120032936364  
AGACGAAC -0.132621156853  
AGACGAAG -0.149912953306  
AGACGAAT -0.098478519217  
AGACGACA -0.217011691989  
AGACGACC -0.354092758441  
AGACGACG -0.238610740165  
AGACGACT -0.168193078159  
AGACGAGA 0.189971752443  
AGACGAGC -0.194115895881  
AGACGAGG -0.264853265858  
AGACGATA 0.0395698729032  
AGACGATC 0.250015693087

AGACGATG 0.0908332574999  
AGACGCAA 0.0187804084087  
AGACGCAC -0.192917049205  
AGACGCAG -0.0825202218197  
AGACGCAT -0.0849553995647  
AGACGCCA -0.111239300335  
AGACGCCC -0.403311877253  
AGACGCCG -0.255426558508  
AGACGCCT -0.219653132794  
AGACGCGA 0.168460471491  
AGACGCGC -0.149391271856  
AGACGCGG -0.152156463846  
AGACGCTA -0.171092140854  
AGACGCTC -0.143407254975  
AGACGCTG -0.131559355992  
AGACGGAA -0.0846312701446  
AGACGGAC -0.261251581454  
AGACGGAG -0.109314905337  
AGACGGAT 0.041545689919  
AGACGGCA -0.138274922386  
AGACGGCC -0.415712518153  
AGACGGCG -0.40284977306  
AGACGGCT -0.273073594716  
AGACGGGA -0.0227476770582  
AGACGGGC -0.132495705711  
AGACGGGG -0.274780993297  
AGACGGTA -0.0932115767968  
AGACGGTC -0.395180737048  
AGACGGTG -0.11989266067  
AGACGTAA -0.0442158200915  
AGACGTAC 0.0491662461359  
AGACGTAG -0.295438135143  
AGACGTAT 0.154659718966  
AGACGTCA -0.034893396495  
AGACGTCC -0.16446804346  
AGACGTCCG -0.103728427537  
AGACGTCT 0.134067348587  
AGACGTGA -0.0776727140364  
AGACGTGC -0.207338821603  
AGACGTGG -0.344450508107  
AGACGTGA -0.0869912243699  
AGACGTTC -0.0799825186876  
AGACGTTG -0.0830181490667  
AGACTAAA -0.115347565719  
AGACTAAC -0.0196408529742  
AGACTAAG -0.0349845354881  
AGACTAAT -0.108841736637  
AGACTACA -0.16892042776  
AGACTACC -0.181899049162  
AGACTACG -0.0574506349181  
AGACTACT -0.04588293687  
AGACTAGA 0.117146071692  
AGACTAGC -0.0458756192981  
AGACTAGG -0.111412357305

AGACTATA 0.00438749516434  
AGACTATC -0.0871404275819  
AGACTATG -0.012964755389  
AGACTCAA -0.142535097081  
AGACTCAC -0.181298710019  
AGACTCAG -0.278446258301  
AGACTCAT 0.0635044524767  
AGACTCCA -0.141437327841  
AGACTCCC -0.447592309746  
AGACTCCG -0.283919833492  
AGACTCCT -0.413392410272  
AGACTCGA 0.0161566525203  
AGACTCGC -0.290678771198  
AGACTCGG -0.363511200417  
AGACTCTA -0.170631729356  
AGACTCTC -0.141015038112  
AGACTCTG -0.00669782575726  
AGACTGAA -0.0608498349835  
AGACTGAC -0.209979770647  
AGACTGAG -0.0294440584601  
AGACTGAT 0.00844872010102  
AGACTGCA -0.330010724369  
AGACTGCC -0.374550437781  
AGACTGCG -0.171589424754  
AGACTGCT -0.185884023212  
AGACTGGA 0.132010977862  
AGACTGGC 0.0541285795039  
AGACTGGG -0.102015883111  
AGACTGTA -0.107548739809  
AGACTGTC -0.0763107617691  
AGACTGTG 0.0791273367031  
AGACTTAA -0.100481133466  
AGACTTAC -0.144891202964  
AGACTTAG -0.0761009514514  
AGACTTAT 0.0118617840485  
AGACTTCA -0.194826944548  
AGACTTCC -0.293797295621  
AGACTTCG -0.0594212968707  
AGACTTGA -0.126626912251  
AGACTTGC -0.197481702022  
AGACTTGG -0.213448150575  
AGACTTTA -0.07073878286  
AGACTTTC -0.13947691332  
AGACTTTG 0.0700025093964  
AGAGAAAA -0.0225666591243  
AGAGAAAC -0.0138844082686  
AGAGAAAG -0.0498380003033  
AGAGAAAT 0.247469232318  
AGAGAACA -0.0214046407743  
AGAGAACC -0.0982978089874  
AGAGAACG -0.246161446195  
AGAGAACT -0.0997411046687  
AGAGAAGA 0.0211082968986  
AGAGAAGC -0.119161062445

AGAGAAGG -0.185126822234  
AGAGAATA 0.203416915538  
AGAGAATC 0.480298590909  
AGAGAATG -0.118049868614  
AGAGACAA -0.0780774819337  
AGAGACAC -0.0834015766269  
AGAGACAG -0.179872845725  
AGAGACAT -0.0432027035904  
AGAGACCA -0.0554493887827  
AGAGACCC -0.333093554922  
AGAGACCG -0.0975003247943  
AGAGACCT -0.270477883913  
AGAGACGA -0.0347305642686  
AGAGACGC -0.357338548083  
AGAGACGG -0.396908179151  
AGAGACTA -0.135805271216  
AGAGACTC -0.156951717558  
AGAGACTG -0.0486033565763  
AGAGAGAA -0.108995089728  
AGAGAGAC -0.331725570937  
AGAGAGAG -0.0557471787279  
AGAGAGAT 0.278514051241  
AGAGAGCA -0.230394953606  
AGAGAGCC -0.280310248774  
AGAGAGCG -0.11553041268  
AGAGAGCT -0.226143125919  
AGAGAGGA 0.00743962671564  
AGAGAGGC -0.418112710451  
AGAGAGGG -0.23175186003  
AGAGAGTA 0.0761629397993  
AGAGAGTC -0.119732000683  
AGAGAGTG -0.0744559986984  
AGAGATAA 0.0354934059056  
AGAGATAC 0.205873917995  
AGAGATAG 0.0938629081115  
AGAGATAT 0.416668734645  
AGAGATCA 0.187056202208  
AGAGATCC 0.359676065488  
AGAGATCG 0.276101253257  
AGAGATCT 0.421568951872  
AGAGATGA -0.111073893038  
AGAGATGC -0.0430779404101  
AGAGATGG -0.0718453928307  
AGAGATTA 0.315858046904  
AGAGATTC 0.41392305278  
AGAGATTG 0.358610395393  
AGAGCAAA -0.0660146288844  
AGAGCAAC -0.234607719089  
AGAGCAAG -0.120268978451  
AGAGCAAT 0.223664445304  
AGAGCACA -0.151300013865  
AGAGCACC -0.412523393336  
AGAGCACG -0.306726714622  
AGAGCACT -0.203979379454



AGAGCAGA 0.00865266572172  
AGAGCAGC -0.437124024151  
AGAGCAGG -0.310555929265  
AGAGCATA -0.0404221094378  
AGAGCATC -0.0858499448917  
AGAGCATG -0.249217770059  
AGAGCCAA -0.318912124896  
AGAGCCAC -0.120567229265  
AGAGCCAG -0.160461708441  
AGAGCCAT -0.1124001511  
AGAGCCCA -0.187382998492  
AGAGCCCC -0.432190616329  
AGAGCCCG -0.105201345956  
AGAGCCCT -0.32894015186  
AGAGCCGA -0.196938620794  
AGAGCCGC -0.432653266669  
AGAGCCGG -0.295170490612  
AGAGCCTA -0.228712030208  
AGAGCCTC 0.0166637714966  
AGAGCCTG -0.116736833109  
AGAGCGAA -0.0642910215182  
AGAGCGAC -0.224066320403  
AGAGCGAG -0.113459189217  
AGAGCGAT 0.147970284334  
AGAGCGCA -0.243712176379  
AGAGCGCC -0.191698618261  
AGAGCGCG -0.180888778619  
AGAGCGCT -0.118158726451  
AGAGCGGA -0.0869770775614  
AGAGCGGC -0.262028194634  
AGAGCGGG -0.0637311256124  
AGAGCGTA 0.0707451661642  
AGAGCGTC -0.31206065497  
AGAGCGTG -0.162740998983  
AGAGCTAA -0.116050743414  
AGAGCTAC -0.0356761720398  
AGAGCTAG -0.047567571513  
AGAGCTAT -0.0152938256826  
AGAGCTCA -0.157814116888  
AGAGCTCC -0.330853713884  
AGAGCTCG -0.359921117257  
AGAGCTCT -0.178664450673  
AGAGCTGA -0.119844007179  
AGAGCTGC -0.165661025936  
AGAGCTGG -0.211384149163  
AGAGCTTA -0.107066704613  
AGAGCTTC -0.232875062939  
AGAGCTTG -0.206888706889  
AGAGGAAA -0.124346238996  
AGAGGAAC -0.210591686448  
AGAGGAAG -0.370625008208  
AGAGGAAT 0.23630783419  
AGAGGACA -0.119843928803  
AGAGGACC -0.430203140115

AGAGGACG -0.288944294216  
AGAGGACT -0.153515616446  
AGAGGAGA -0.0113639847303  
AGAGGAGC -0.336449545957  
AGAGGAGG -0.365386682542  
AGAGGATA 0.262550562077  
AGAGGATC 0.383324095445  
AGAGGATG -0.138964014259  
AGAGGCAA -0.143994839606  
AGAGGCAC -0.104493514728  
AGAGGCAG -0.212923334574  
AGAGGCAT -0.0917562101397  
AGAGGCCA -0.258148855646  
AGAGGCCC -0.459502021179  
AGAGGCCG -0.0893341052254  
AGAGGCCT -0.174024232437  
AGAGGCCG 0.114587038829  
AGAGGCCG -0.331778599251  
AGAGGCCG -0.149433175276  
AGAGGCTA -0.231406348655  
AGAGGCTC -0.151772878858  
AGAGGCTG -0.242022632979  
AGAGGGAA -0.227312334102  
AGAGGGAC -0.229111038282  
AGAGGGAG -0.0988672991924  
AGAGGGAT 4.30626130394E-5  
AGAGGGCA -0.200812123242  
AGAGGGCC -0.481059252377  
AGAGGGCG -0.216893218084  
AGAGGGCT -0.207668359545  
AGAGGGGA -0.124133628144  
AGAGGGGC -0.298491292834  
AGAGGGGG -0.243138081888  
AGAGGGTA -0.0133502167459  
AGAGGGTC -0.39336613061  
AGAGGGTG -0.137844887477  
AGAGGTAA -0.0422984341266  
AGAGGTAC 0.0258180944158  
AGAGGTAG -0.272725481927  
AGAGGTAT -0.0525320207911  
AGAGGTCA -0.25144311254  
AGAGGTCC -0.245545128638  
AGAGGTCC -0.274226453587  
AGAGGTGA -0.222696021781  
AGAGGTGC -0.42344968452  
AGAGGTGG -0.117735360526  
AGAGGTTA -0.13488577298  
AGAGGTTC -0.169712677487  
AGAGGTTG 0.0419195200105  
AGAGTAAA -0.160678395077  
AGAGTAAC 0.110344661477  
AGAGTAAG -0.0485306968561  
AGAGTAAT 0.230376707079  
AGAGTACA -0.138925593687

AGAGTACC -0.266223569981  
AGAGTACG -0.131897053268  
AGAGTACT -0.0338200217838  
AGAGTAGA 0.144588927215  
AGAGTAGC -0.219348302527  
AGAGTAGG -0.0701332892252  
AGAGTATA 0.128573477058  
AGAGTATC 0.267183215789  
AGAGTATG -0.0396670145909  
AGAGTCAA -0.0803734729952  
AGAGTCAC -0.187178617611  
AGAGTCAG -0.0840143267688  
AGAGTCAT 0.0249381613018  
AGAGTCCA -0.242856642545  
AGAGTCCC -0.122269369794  
AGAGTCCG -0.2586923435  
AGAGTCCT -0.0946011894423  
AGAGTCGA 0.10838585999  
AGAGTCGC -0.306610184761  
AGAGTCGG -0.107751668693  
AGAGTCTA -0.20780785251  
AGAGTCTC -0.0936449639207  
AGAGTCTG -0.068262026447  
AGAGTGAA -0.166065796061  
AGAGTGAC -0.13234746793  
AGAGTGAG -0.0441537722754  
AGAGTGAT -0.0300176209267  
AGAGTGCA -0.135644474939  
AGAGTGCC -0.332579374922  
AGAGTGCG -0.230857765097  
AGAGTGCT -0.264768642241  
AGAGTGGA 0.0176164025605  
AGAGTGGC -0.302231514117  
AGAGTGGG -0.30363920518  
AGAGTGTA 0.0825551265301  
AGAGTGTC -0.105849912451  
AGAGTGTG 0.150140498625  
AGAGTTAA -0.115858313252  
AGAGTTAC -0.0692083267841  
AGAGTTAG 0.0809806630215  
AGAGTTAT 0.0753343921384  
AGAGTTCA -0.177999372432  
AGAGTTCC -0.244443356251  
AGAGTTCG -0.218734172411  
AGAGTTGA -0.224397438686  
AGAGTTGC 0.0170211533848  
AGAGTTGG -0.214089540651  
AGAGTTTA 0.0881725217696  
AGAGTTTC -0.176255243106  
AGAGTTTG 0.0740151675511  
AGATAAAA 0.108903124506  
AGATAAAC -0.146143560534  
AGATAAAG -0.176043759768  
AGATAAAT 0.206271009301

AGATAACA 0.0239870659767  
AGATAACC -0.0620052115647  
AGATAACG 0.110864307834  
AGATAACT -0.0263527990801  
AGATAAGA 0.145102402678  
AGATAAGC -0.114415740902  
AGATAAGG 0.117717944062  
AGATAATA 0.120939687452  
AGATAATC 0.320649182865  
AGATAATG 0.226511635603  
AGATACAA 0.0477150135398  
AGATACAC 0.144384197335  
AGATACAG -0.0737335131275  
AGATACAT 0.115307693992  
AGATACCA 0.296074311226  
AGATACCC 0.344957905564  
AGATACCG 0.40956694379  
AGATACCT 0.261497193492  
AGATACGA 0.365243826778  
AGATACGC 0.405321299261  
AGATACGG 0.358174926173  
AGATACTA 0.278332051059  
AGATACTC 0.357507645386  
AGATACTG 0.327463632183  
AGATAGAA -0.0820477399751  
AGATAGAC -0.0585168971907  
AGATAGAG -0.0868619423951  
AGATAGAT 0.22259863169  
AGATAGCA 0.0757815522288  
AGATAGCC -0.0131654051371  
AGATAGCG 0.193069583344  
AGATAGCT 0.0999240892535  
AGATAGGA -0.085767464946  
AGATAGGC 0.0597877418743  
AGATAGGG -0.186955658669  
AGATAGTA 0.266807005352  
AGATAGTC 0.0114985846389  
AGATAGTG 0.118592293599  
AGATATAA 0.192171510353  
AGATATAC 0.244444168687  
AGATATAG 0.259529353372  
AGATATAT 0.302561987694  
AGATATCA 0.449677014372  
AGATATCC 0.479778544995  
AGATATCG 0.464030145848  
AGATATCT 0.483235896461  
AGATATGA 0.31582684613  
AGATATGC 0.423575396159  
AGATATGG 0.393932499993  
AGATATTA 0.378166171544  
AGATATTC 0.442907094422  
AGATATTG 0.339872819972  
AGATCAAA 0.0879189423262  
AGATCAAC 0.105773817895

AGATCAAG 0.0507718809077  
AGATCAAT 0.179132441621  
AGATCACA 0.187519251403  
AGATCACC 0.0155974686686  
AGATCACG 0.262542156482  
AGATCACT 0.0626898681051  
AGATCAGA 0.172413012854  
AGATCAGC -0.0506349009389  
AGATCAGG 0.168073926099  
AGATCATA 0.0951226708802  
AGATCATC 0.215233139476  
AGATCATG 0.119171402338  
AGATCCAA 0.351501062021  
AGATCCAC 0.295617931982  
AGATCCAG 0.313560287001  
AGATCCAT 0.198634538992  
AGATCCCA 0.226428908247  
AGATCCCC 0.386560148318  
AGATCCCG 0.293011831858  
AGATCCCT 0.291096882006  
AGATCCGA 0.319767425828  
AGATCCGC 0.302756002712  
AGATCCGG 0.282571267712  
AGATCCTA 0.320529477457  
AGATCCTC 0.396899654475  
AGATCCTG 0.338498427042  
AGATCGAA 0.114525380489  
AGATCGAC 0.0819565994905  
AGATCGAG 0.170370094613  
AGATCGAT 0.293256689165  
AGATCGCA 0.385059451253  
AGATCGCC 0.371196265136  
AGATCGCG 0.466967146705  
AGATCGCT 0.341758209674  
AGATCGGA 0.253050571232  
AGATCGGC 0.13490434516  
AGATCGGG 0.213331824851  
AGATCGTA 0.303569264907  
AGATCGTC 0.337483850719  
AGATCGTG 0.35270945877  
AGATCTAA 0.324041809303  
AGATCTAC 0.31644588252  
AGATCTAG 0.341661861419  
AGATCTAT 0.327819828763  
AGATCTCA 0.423482711361  
AGATCTCC 0.451681709257  
AGATCTCG 0.447688735568  
AGATCTGA 0.379576546243  
AGATCTGC 0.431686167456  
AGATCTGG 0.37645234046  
AGATCTTA 0.356922841106  
AGATCTTC 0.41710301015  
AGATCTTG 0.405172879426  
AGATGAAA 0.090298022671

AGATGAAC -0.193360808734  
AGATGAAG -0.119861417861  
AGATGAAT 0.0939621760107  
AGATGACA -0.0644493933153  
AGATGACC -0.17703240936  
AGATGACG -0.106785949375  
AGATGACT -0.13643715831  
AGATGAGA 0.0316887135069  
AGATGAGC -0.187604239893  
AGATGAGG -0.0495246561366  
AGATGATA 0.232666550848  
AGATGATC 0.141280398856  
AGATGATG -0.0351549897004  
AGATGCAA 0.0331476288557  
AGATGCAC -0.130543856704  
AGATGCAG -0.00151602519653  
AGATGCAT 0.065869360525  
AGATGCCA -0.10027100271  
AGATGCCC -0.158407719014  
AGATGCCG 0.149059527847  
AGATGCCT -0.115465187199  
AGATGCGA 0.13397005905  
AGATGCGC -0.042862517292  
AGATGCGG -0.0116822259367  
AGATGCTA 0.227452683518  
AGATGCTC -0.110316967917  
AGATGCTG 0.0584709823872  
AGATGGAA -0.228131107533  
AGATGGAC -0.258133127473  
AGATGGAG -0.0175206445086  
AGATGGAT 0.164227485917  
AGATGGCA -0.0433451512661  
AGATGGCC -0.189433424165  
AGATGGCG -0.0778434242963  
AGATGGCT -0.0982311632313  
AGATGGGA -0.111853157928  
AGATGGGC -0.116253752822  
AGATGGGG -0.132945964449  
AGATGGTA -0.0236464408322  
AGATGGTC -0.147554926952  
AGATGGTG -0.212213286933  
AGATGTAA 0.0867685867686  
AGATGTAC -0.0152694137637  
AGATGTAG 0.0315687272005  
AGATGTAT 0.1979540594  
AGATGTCA 0.00359174601599  
AGATGTCC -0.0727435424405  
AGATGTCCG 0.0854173732962  
AGATGTGA -0.10870491887  
AGATGTGC -0.23347936937  
AGATGTGG 0.000475172076524  
AGATGTTA 0.16966966967  
AGATGTTC 0.0779742049444  
AGATGTTG 0.180468310913

AGATTAAG -0.174731210265  
AGATTAAT 0.111366174463  
AGATTACA 0.467780452629  
AGATTACC 0.471179616349  
AGATTACG 0.479950803997  
AGATTACT 0.429182626152  
AGATTAGA 0.023508244345  
AGATTAGC 0.170766333584  
AGATTAGG 0.173329161926  
AGATTATA 0.314839091115  
AGATTATC 0.406796201543  
AGATTATG 0.367109533776  
AGATTCAA 0.11699992003  
AGATTCAC 0.264863543134  
AGATTCAG 0.284539024693  
AGATTCAT 0.254196117979  
AGATTCCA 0.44067867127  
AGATTCCC 0.489248579299  
AGATTCCG 0.463793493573  
AGATTCCT 0.452952952953  
AGATTCGA 0.394917109607  
AGATTCGC 0.475974248739  
AGATTCGG 0.418679009588  
AGATTCTA 0.452415225142  
AGATTCTC 0.492455639658  
AGATTCTG 0.466321693594  
AGATTGAA 0.0558988740807  
AGATTGAC 0.0882893075334  
AGATTGAG 0.130080170766  
AGATTGAT 0.110020218535  
AGATTGCA 0.465715026321  
AGATTGCC 0.4486989336  
AGATTGCG 0.494782596002  
AGATTGCT 0.430147515018  
AGATTGGA 0.156417980246  
AGATTGGC 0.194739531251  
AGATTGGG 0.143406491891  
AGATTGTA 0.330408921318  
AGATTGTC 0.391257855667  
AGATTGTG 0.440710787355  
AGATTTAA 0.278691597575  
AGATTTAC 0.342134843763  
AGATTTAG 0.324163005981  
AGATTTAT 0.331773922683  
AGATTTCA 0.460068027707  
AGATTTCC 0.497392757823  
AGATTTCG 0.484207645088  
AGATTTGA 0.264910916426  
AGATTTGC 0.47263133732  
AGATTTGG 0.361786968169  
AGATTTTA 0.430125718005  
AGATTTTC 0.489603147376

AGATTTTG 0.462778205202  
AGCAAAA 0.0281256614819  
AGCAAAAC 0.114082401961  
AGCAAAAG 0.0204718144858  
AGCAAAAT 0.220680569039  
AGCAAACA -0.089386306673  
AGCAAACC -0.12280542113  
AGCAAACG -0.19560235697  
AGCAAAC T -0.163500626931  
AGCAAAGA -0.108969377159  
AGCAAAGC -0.0486116280801  
AGCAAAGG -0.164101376517  
AGCAAATA 0.267558374634  
AGCAAATC 0.418091645364  
AGCAAATG -0.0866003744792  
AGCAACAA -0.0773468324276  
AGCAACAC -0.223484887192  
AGCAACAG -0.160532881225  
AGCAACAT -0.0893570560064  
AGCAACCA -0.0998709581358  
AGCAACCC -0.0830422782715  
AGCAACCG -0.271476455492  
AGCAACCT -0.17811604757  
AGCAACGA -0.140184767618  
AGCAACGC -0.322415195247  
AGCAACGG -0.179102724082  
AGCAACTA 0.0455400303885  
AGCAACTC -0.0785437660412  
AGCAACTG -0.187743171885  
AGCAAGAA -0.0448361731352  
AGCAAGAC -0.0110953774735  
AGCAAGAG -0.0868316637853  
AGCAAGAT 0.294032434176  
AGCAAGCA -0.174435758503  
AGCAAGCC -0.107884326455  
AGCAAGCG -0.25034253956  
AGCAAGCT -0.341392092825  
AGCAAGGA -0.0367064954782  
AGCAAGGC -0.246753388894  
AGCAAGGG -0.0788826112784  
AGCAAGTA 0.214558075371  
AGCAAGTC -0.141175270409  
AGCAAGTG 0.00299886663523  
AGCAATAA -0.125074447229  
AGCAATAC 0.182863878893  
AGCAATAG -0.18752308229  
AGCAATAT 0.298451128807  
AGCAATCA 0.327985009803  
AGCAATCC 0.401675780464  
AGCAATCG 0.28705978706  
AGCAATGA -0.059780442764  
AGCAATGC 0.00425006094455  
AGCAATGG -0.153805320472  
AGCAATTA 0.0102588994402



AGCAATTC 0.055092282365  
AGCAATTG 0.0401158734492  
AGCACAAA -0.0713426925548  
AGCACAAC -0.0308033806235  
AGCACAAAG -0.0621627136779  
AGCACAAAT 0.0518863426467  
AGCACACA -0.185720941645  
AGCACACC -0.292368858528  
AGCACACG -0.296276596521  
AGCACACT -0.146581556474  
AGCACAGA -0.0557046001538  
AGCACAGC -0.230579643343  
AGCACAGG -0.289670037679  
AGCACATA 0.0729261403035  
AGCACATC -0.309267850301  
AGCACATG -0.0731130579615  
AGCACCAA -0.257372624591  
AGCACACC -0.128854633588  
AGCACACG -0.294203008517  
AGCACCAT -0.260854558907  
AGCACCCA -0.188315696102  
AGCACCCC -0.128036739347  
AGCACCCG -0.385592788264  
AGCACCCCT -0.223758704286  
AGCACCGA -0.21984073826  
AGCACCGC -0.183638725308  
AGCACCGG -0.250332375489  
AGCACCTA -0.0463500799253  
AGCACCTC -0.112133037199  
AGCACCTG -0.203202651678  
AGCACGAA -0.00570571447341  
AGCACGAC -0.0826457304514  
AGCACGAG -0.122736728393  
AGCACGAT 0.0829590106299  
AGCACGCA -0.23656749637  
AGCACGCC -0.272221257549  
AGCACGCG 0.0114384356547  
AGCACGCT -0.245630742062  
AGCACGGA -0.0635342129572  
AGCACGGC -0.157781870346  
AGCACGGG -0.0757246191689  
AGCACGTA 0.154074745018  
AGCACGTC -0.326582147334  
AGCACGTG -0.0266340720886  
AGCACTAA -0.230393981188  
AGCACTAC -0.123936702116  
AGCACTAG -0.176305669272  
AGCACTAT 0.122066670073  
AGCACTCA 0.0276461099392  
AGCACTCC -0.161693539558  
AGCACTCG -0.175419371735  
AGCACTGA -0.0555878338431  
AGCACTGC -0.0885872846521  
AGCACTGG -0.229484602596

AGCACTTA 0.0753027305971  
AGCACTTC 0.0362933658387  
AGCACTTG -0.211951644137  
AGCAGAAA -0.156434308592  
AGCAGAAC -0.0372264883224  
AGCAGAAG -0.434983521942  
AGCAGAAT 0.221571060488  
AGCAGACA -0.235948750359  
AGCAGACC -0.112066537158  
AGCAGACG -0.121189317022  
AGCAGACT -0.307923407547  
AGCAGAGA 0.02334428092  
AGCAGAGC -0.150329635365  
AGCAGAGG -0.122300546568  
AGCAGATA 0.290955012808  
AGCAGATC 0.329214889821  
AGCAGATG -0.0259184105458  
AGCAGCAA -0.189404079884  
AGCAGCAC -0.215156374672  
AGCAGCAG -0.143100375556  
AGCAGCAT -0.0126298565283  
AGCAGCCA -0.13633948654  
AGCAGCCC -0.371632949347  
AGCAGCCG -0.251242241916  
AGCAGCCT -0.367072202793  
AGCAGCGA -0.11727412982  
AGCAGCGC -0.140154929772  
AGCAGCGG -0.172163626587  
AGCAGCTA -0.165129698093  
AGCAGCTC -0.318269779443  
AGCAGCTG -0.182170508695  
AGCAGGAA -0.16016136457  
AGCAGGAC -0.0520239608709  
AGCAGGAG -0.173601808439  
AGCAGGAT 0.0380320138975  
AGCAGGCA -0.171319552976  
AGCAGGCC -0.310394613011  
AGCAGGCG -0.371939876479  
AGCAGGCT -0.256558870194  
AGCAGGGA -0.0596191292106  
AGCAGGGC -0.220870977581  
AGCAGGGG -0.199807341906  
AGCAGGTA 0.02566923359  
AGCAGGTC -0.263898883127  
AGCAGGTG -0.222376349751  
AGCAGTAA -0.017586920125  
AGCAGTAC -0.178851815147  
AGCAGTAG -0.162890370152  
AGCAGTAT 0.272726144683  
AGCAGTCA 0.111526754889  
AGCAGTCC -0.243148880778  
AGCAGTCG -0.241998114284  
AGCAGTGA -0.227956319118  
AGCAGTGC -0.294898299525

AGCAGTGG -0.0359700130414  
AGCAGTTA -0.0421482088149  
AGCAGTTC -0.000771477660722  
AGCAGTTG 0.0646147957817  
AGCATAAA -0.222477234945  
AGCATAAC -0.158098361804  
AGCATAAG -0.167100920618  
AGCATAAT 0.198637256118  
AGCATACA -0.0419948929278  
AGCATACC -0.157610704179  
AGCATACG -0.0563532710308  
AGCATACT -0.28273200052  
AGCATAGA 0.133630587009  
AGCATAGC -0.232244527711  
AGCATAGG -0.119072038466  
AGCATATA 0.30757358637  
AGCATATC 0.340878660377  
AGCATATG -0.0482083522907  
AGCATCAA 0.042892755014  
AGCATCAC 0.186176215119  
AGCATCAG -0.0582797996739  
AGCATCAT 0.0772063385473  
AGCATCCA -0.0923486860064  
AGCATCCC -0.225638183778  
AGCATCCG -0.230218594149  
AGCATCCT -0.151142225305  
AGCATCGA 0.00949545843995  
AGCATCGC 0.0232058217733  
AGCATCGG -0.162993206214  
AGCATCTA 0.185526594308  
AGCATCTC -0.0889815205375  
AGCATCTG 0.134203538725  
AGCATGAA -0.185179482764  
AGCATGAC -0.156220980274  
AGCATGAG -0.205856731313  
AGCATGAT -0.187589095411  
AGCATGCA -0.246338672059  
AGCATGCC -0.22804420517  
AGCATGCG -0.256743464498  
AGCATGCT -0.327917648518  
AGCATGGA 0.0259931367721  
AGCATGGC -0.206358160464  
AGCATGGG -0.167976019155  
AGCATGTA 0.12702923309  
AGCATGTC -0.16133525982  
AGCATGTG -0.0400993279781  
AGCATTAA -0.0897326660325  
AGCATTAC -0.12998072644  
AGCATTAG -0.156767136245  
AGCATTAT 0.0952881255912  
AGCATTCA -0.117136131305  
AGCATTCC -0.191504905893  
AGCATTCCG -0.190633159698  
AGCATTGA -0.282202478332

AGCATTGC -0.247963344333  
AGCATTGG -0.257118857071  
AGCATTTA 0.142921687846  
AGCATTTTC 0.000654924897349  
AGCATTTTG -0.0278015809873  
AGCCAAAA -0.0235070969503  
AGCCAAAC -0.189685119476  
AGCCAAAG -0.179335974438  
AGCCAAAT 0.0380363933636  
AGCCAACA 0.00775092516222  
AGCCAACC -0.205731867696  
AGCCAACG -0.434107492242  
AGCCAACT -0.22627092242  
AGCCAAGA -0.139882109349  
AGCCAAGC -0.347198327124  
AGCCAAGG -0.173798398324  
AGCCAATA 0.0188981263184  
AGCCAATC -0.00918301059101  
AGCCAATG -0.191125754358  
AGCCACAA -0.138652508663  
AGCCACAC -0.174385542907  
AGCCACAG -0.16973125884  
AGCCACAT -0.236996577567  
AGCCACCA -0.252745015332  
AGCCACCC -0.200132937003  
AGCCACCG -0.267926430824  
AGCCACCT -0.18023125977  
AGCCACGA -0.0229147417174  
AGCCACGC -0.282510677478  
AGCCACGG -0.225090201461  
AGCCACTA -0.0873439253212  
AGCCACTC -0.326043811556  
AGCCACTG -0.0415594518581  
AGCCAGAA -0.00575688507781  
AGCCAGAC -0.119305734947  
AGCCAGAG -0.293244247015  
AGCCAGAT 0.177907783041  
AGCCAGCA -0.211518063171  
AGCCAGCC -0.278853996886  
AGCCAGCG -0.211646178298  
AGCCAGCT -0.323751367769  
AGCCAGGA -0.00536066432826  
AGCCAGGC -0.275601857594  
AGCCAGGG -0.266883072131  
AGCCAGTA -0.0503012504998  
AGCCAGTC -0.178612882504  
AGCCAGTG -0.206168396961  
AGCCATAA -0.206469055802  
AGCCATAC -0.104868882878  
AGCCATAG -0.277238886027  
AGCCATAT 0.154827996467  
AGCCATCA -0.106702399563  
AGCCATCC -0.174155155177  
AGCCATCG -0.240650799234

AGCCATGA -0.107310355096  
AGCCATGC -0.256794543058  
AGCCATGG -0.251987769481  
AGCCATTA -0.115080645384  
AGCCATTC -0.0108150916403  
AGCCATTG -0.198989648376  
AGCCCAAA 0.0422485627586  
AGCCCAAC -0.162807854813  
AGCCCAAG -0.120289542013  
AGCCCAAT -0.3190400211  
AGCCCACA -0.212016427207  
AGCCCACC -0.247405359266  
AGCCCACG -0.259598806777  
AGCCCACT -0.293266461033  
AGCCCAGA -0.26445927035  
AGCCCAGC -0.357931448824  
AGCCCAGG -0.326475541553  
AGCCCATA -0.0507486607965  
AGCCCATC -0.0963823199363  
AGCCCATG -0.202795518083  
AGCCCCAA -0.348260887963  
AGCCCCAC -0.20361154609  
AGCCCCAG -0.2528700465  
AGCCCCAT -0.185008545986  
AGCCCCCA -0.348374929781  
AGCCCCCC -0.289340068195  
AGCCCCCG -0.385319596381  
AGCCCCCT -0.288381809346  
AGCCCCGA -0.198835320677  
AGCCCCGC -0.165160322934  
AGCCCCGG -0.373778430935  
AGCCCCCTA -0.140505439054  
AGCCCCCTC -0.224945493235  
AGCCCCCTG -0.323758501491  
AGCCCCGAA -0.118806599677  
AGCCCCGAC -0.235254231682  
AGCCCCGAG -0.186043915147  
AGCCCCGAT -0.113324439475  
AGCCCCGCA -0.295325290163  
AGCCCCGCC -0.195334011361  
AGCCCCGCG -0.225655617946  
AGCCCCGCT -0.349509767441  
AGCCCCGGA -0.0836665046425  
AGCCCCGGC -0.254341910397  
AGCCCCGGG -0.092747720072  
AGCCCCGTA -0.0497673982522  
AGCCCCGTC -0.0873677593323  
AGCCCCGTG -0.171922181601  
AGCCCTAA -0.306511271523  
AGCCCTAC -0.202524469065  
AGCCCTAG -0.133450765376  
AGCCCTAT -0.219599037293  
AGCCCTCA -0.238940578092  
AGCCCTCC -0.359950716565

AGCCCTCG -0.366792519443  
AGCCCTGA -0.149518460618  
AGCCCTGC -0.24333487519  
AGCCCTGG -0.315929348151  
AGCCCTTA -0.260673794934  
AGCCCTTC -0.317577456404  
AGCCCTTG -0.154441218878  
AGCCGAAA 0.00544759635669  
AGCCGAAC -0.131916176142  
AGCCGAAG -0.172844560228  
AGCCGAAT 0.016422758847  
AGCCGACA -0.106604419391  
AGCCGACC -0.238861236241  
AGCCGACG -0.113548689526  
AGCCGACT -0.18372931706  
AGCCGAGA 0.0053796401312  
AGCCGAGC -0.241814419812  
AGCCGAGG -0.275958102226  
AGCCGATA 0.248405509368  
AGCCGATC 0.0970949541251  
AGCCGATG -0.198529959062  
AGCCGCAA -0.138352281435  
AGCCGCAC -0.175089003814  
AGCCGCAG -0.169026982614  
AGCCGCAT -0.23700258496  
AGCCGCCA -0.282989771703  
AGCCGCCC -0.306189493036  
AGCCGCCG -0.393936137085  
AGCCGCCT -0.266321424245  
AGCCGCGA 0.0828646088042  
AGCCGCGC -0.245190624647  
AGCCGCGG -0.19110824084  
AGCCGCTA -0.288982884991  
AGCCGCTC -0.182963810447  
AGCCGCTG -0.348451269499  
AGCCGGAA -0.221210442013  
AGCCGGAC -0.309858445896  
AGCCGGAG -0.308407685798  
AGCCGGAT 0.0158828638789  
AGCCGGCA -0.220941094733  
AGCCGGCC -0.384884512461  
AGCCGGCG -0.327446018967  
AGCCGGCT -0.446821086394  
AGCCGGGA -0.177160784833  
AGCCGGGC -0.403688651638  
AGCCGGGG -0.247751519663  
AGCCGGTA -0.223970093211  
AGCCGGTC -0.278073026365  
AGCCGGTG -0.287049211508  
AGCCGTAA -0.110431144839  
AGCCGTAC -0.105431997839  
AGCCGTAG -0.287921638675  
AGCCGTAT -0.0202912492391  
AGCCGTCA -0.0906639558287

AGCCGTCC -0.00662182538466  
AGCCGTCG -0.261845624901  
AGCCGTGA -0.0435516010598  
AGCCGTGC -0.361122824424  
AGCCGTGG -0.240519259241  
AGCCGTTA -0.183279698184  
AGCCGTTC 0.0220980562469  
AGCCGTTG -0.161439562797  
AGCCTAAA -0.150996055471  
AGCCTAAC -0.268211874895  
AGCCTAAG -0.152514825935  
AGCCTAAT -0.14210079238  
AGCCTACA -0.00457581220849  
AGCCTACC -0.155479744724  
AGCCTACG -0.303548993829  
AGCCTACT -0.176446508343  
AGCCTAGA -0.101888332076  
AGCCTAGC -0.292489780843  
AGCCTAGG -0.273205970637  
AGCCTATA -0.0386765626  
AGCCTATC 0.221533240688  
AGCCTATG -0.164352220132  
AGCCTCAA -0.132923066743  
AGCCTCAC -0.0908348980261  
AGCCTCAG -0.189624464791  
AGCCTCAT -0.205971943114  
AGCCTCCA -0.168903886394  
AGCCTCCC -0.381392902425  
AGCCTCCG -0.272778012056  
AGCCTCCT -0.278690569821  
AGCCTCGA -0.0799336981734  
AGCCTCGC -0.225912971094  
AGCCTCGG -0.111044952214  
AGCCTCTA -0.283822268538  
AGCCTCTC -0.233216885772  
AGCCTCTG -0.245212201409  
AGCCTGAA -0.128099093809  
AGCCTGAC -0.126888221687  
AGCCTGAG -0.130472607498  
AGCCTGAT -0.137661898618  
AGCCTGCA -0.182225627156  
AGCCTGCC -0.299792808107  
AGCCTGCG -0.425996264376  
AGCCTGGA -0.187862967433  
AGCCTGGC -0.194428077009  
AGCCTGGG -0.314044396755  
AGCCTGTA -0.0766238695503  
AGCCTGTC -0.208583813131  
AGCCTGTG -0.16672456432  
AGCCTTAA -0.29263862359  
AGCCTTAC -0.0826917476077  
AGCCTTAG -0.303802889449  
AGCCTTAT 0.0323918960283  
AGCCTTCA -0.291186758249

AGCCTTCC -0.360021800003  
AGCCTTCG -0.277420263335  
AGCCTTGA -0.112331908273  
AGCCTTGC -0.363060294446  
AGCCTTGG -0.387816829405  
AGCCTTTA -0.100703856321  
AGCCTTTC -0.113457228163  
AGCCTTTG -0.315747610343  
AGCGAAAA -0.19095569442  
AGCGAAAC 0.0852019161558  
AGCGAAAG -0.0642262451299  
AGCGAAAT 0.297927403988  
AGCGAACA -0.102559330306  
AGCGAACC -0.251539942182  
AGCGAACG -0.201095562149  
AGCGAACT -0.28776160046  
AGCGAAGA -0.111233798996  
AGCGAAGC -0.280147428489  
AGCGAAGG -0.315652368075  
AGCGAATA 0.281429603731  
AGCGAATC 0.456005592369  
AGCGAATG 0.131535075874  
AGCGACAA -0.115575252755  
AGCGACAC -0.0457697186625  
AGCGACAG -0.129102117676  
AGCGACAT -0.094593647777  
AGCGACCA -0.182685017466  
AGCGACCC -0.299629389149  
AGCGACCG -0.252217904057  
AGCGACCT -0.20958537009  
AGCGACGA 0.0597083846595  
AGCGACGC -0.183114298081  
AGCGACGG -0.200378170833  
AGCGACTA -0.149709728793  
AGCGACTC -0.214363015058  
AGCGACTG -0.139791216881  
AGCGAGAA -0.205899219484  
AGCGAGAC 0.109658182668  
AGCGAGAG -0.0461283304795  
AGCGAGAT 0.207668814637  
AGCGAGCA -0.0323806372448  
AGCGAGCC -0.329511089057  
AGCGAGCG -0.0255533221387  
AGCGAGCT -0.169292947276  
AGCGAGGA -0.0316802470668  
AGCGAGGC -0.148162175179  
AGCGAGGG -0.267683901044  
AGCGAGTA 0.0825274310123  
AGCGAGTC -0.284164882743  
AGCGAGTG 0.145207769173  
AGCGATAA -0.0288372721432  
AGCGATAC 0.19085890298  
AGCGATAG -0.0270483128107  
AGCGATAT 0.327174587418



AGCGATCA 0.209898323394  
AGCGATCC 0.284462770189  
AGCGATCG 0.202349732653  
AGCGATGA -0.0127799976285  
AGCGATGC -0.188838154481  
AGCGATGG -0.265202049462  
AGCGATTA 0.123722108275  
AGCGATTC 0.21042969862  
AGCGATTG 0.231351868207  
AGCGCAAA -0.00382782837432  
AGCGCAAC -0.0321823200611  
AGCGCAAG 0.0208517737243  
AGCGCAAT 0.284470607906  
AGCGCACA -0.0730356269571  
AGCGCACC -0.238571739676  
AGCGCACG -0.278051453261  
AGCGCACT -0.0944393439369  
AGCGCAGA -0.0119479135493  
AGCGCAGC -0.277735459742  
AGCGCAGG -0.179532230851  
AGCGCATA 0.0160041913113  
AGCGCATC -0.0732040580525  
AGCGCATG -0.217843839522  
AGCGCCAA -0.0975565122454  
AGCGCCAC -0.25092700571  
AGCGCCAG -0.187757167388  
AGCGCCAT -0.238117022503  
AGCGCCCA -0.199099918676  
AGCGCCCC -0.235579427891  
AGCGCCCG -0.359480123588  
AGCGCCCT -0.30239830344  
AGCGCCGA -0.0976531310805  
AGCGCCGC -0.187945110301  
AGCGCCGG -0.316847620859  
AGCGCCTA -0.0366202658329  
AGCGCCTC -0.165138049861  
AGCGCCTG -0.0674027818527  
AGCGCGAA -0.041825475258  
AGCGCGAC -0.126420286139  
AGCGCGAG -0.0607087024492  
AGCGCGAT 0.285636810873  
AGCGCGCA 0.0858089494453  
AGCGCGCC -0.142714923707  
AGCGCGCG -0.0931690028799  
AGCGCGCT 0.00806920636496  
AGCGCGGA 0.162888784101  
AGCGCGGC -0.068743380076  
AGCGCGGG -0.341324965478  
AGCGCGTA -0.0521692491389  
AGCGCGTC -0.0772243107769  
AGCGCGTG 0.115450756553  
AGCGCTAA -0.124237425458  
AGCGCTAC -0.0798617548521  
AGCGCTAG -0.29208184146

AGCGCTAT 0.0530579622344  
AGCGCTCA -0.0394582600381  
AGCGCTCC -0.17546409089  
AGCGCTCG -0.176523853234  
AGCGCTGA 0.0297504434209  
AGCGCTGC -0.12335538561  
AGCGCTGG -0.127676998288  
AGCGCTTA -0.284433170757  
AGCGCTTC 0.0155171784559  
AGCGCTTG -0.132211724421  
AGCGGAAA -0.0964017824693  
AGCGGAAC -0.132415336181  
AGCGGAAG -0.318269265222  
AGCGGAAT 0.0787187141887  
AGCGGACA -0.177386353852  
AGCGGACC -0.306127080071  
AGCGGACG -0.117644322608  
AGCGGACT -0.183393574463  
AGCGGAGA 0.119236316206  
AGCGGAGC -0.266911718089  
AGCGGAGG -0.268645527581  
AGCGGATA 0.254198730551  
AGCGGATC 0.321617761012  
AGCGGATG -0.0181171215229  
AGCGGCAA -0.131895005884  
AGCGGCAC -0.156837850729  
AGCGGCAG -0.218424328572  
AGCGGCAT -0.280201175799  
AGCGGCCA -0.137727037224  
AGCGGCCC -0.468712543914  
AGCGGCCG -0.217963149016  
AGCGGCCT -0.383750826255  
AGCGGCGA -0.00382216461363  
AGCGGCGC -0.255690919066  
AGCGGCGG -0.304738906669  
AGCGGCTA -0.229275386291  
AGCGGCTC -0.384014288904  
AGCGGCTG -0.140843902356  
AGCGGGAA -0.285501121484  
AGCGGGAC -0.0790236183135  
AGCGGGAG -0.16644479574  
AGCGGGAT 0.0841378568651  
AGCGGGCA -0.295302993966  
AGCGGGCC -0.266749085536  
AGCGGGCG -0.14525201223  
AGCGGGGA 0.117744466229  
AGCGGGGC -0.220177843667  
AGCGGGGG -0.297444155662  
AGCGGGTA -0.0553314251434  
AGCGGGTC -0.25478060646  
AGCGGGTG -0.0422950561263  
AGCGGTAA 0.134080361353  
AGCGGTAC -0.0324918363504  
AGCGGTAG -0.162579267377

AGCGGTAT 0.12942556882  
AGCGGTCA -0.116561842722  
AGCGGTCC -0.330397823588  
AGCGGTCCG -0.324283802773  
AGCGGTGA -0.168211733618  
AGCGGTGC -0.30818255049  
AGCGGTGG -0.185389154876  
AGCGGTTA -0.0505854325749  
AGCGGTTC -0.0506900497718  
AGCGGTTG -0.164931373927  
AGCGTAAA -0.0135764011042  
AGCGTAAC 0.123960048202  
AGCGTAAG -0.211703922396  
AGCGTAAT 0.297593736988  
AGCGTACA 0.0706655136513  
AGCGTACC -0.0960906932691  
AGCGTACG -0.26814847891  
AGCGTACT -0.160375458156  
AGCGTAGA 0.0878396823427  
AGCGTAGC -0.210348521713  
AGCGTAGG -0.254606773784  
AGCGTATA 0.131228513244  
AGCGTATC 0.331669134699  
AGCGTATG 0.0848824030642  
AGCGTCAA 0.0916407209054  
AGCGTCAC -0.0703662001539  
AGCGTCAG -0.0919997132118  
AGCGTCAT -0.16613053181  
AGCGTCCA -0.0990680953955  
AGCGTCCC -0.277952823193  
AGCGTCCG -0.26776883262  
AGCGTCCT -0.322859806227  
AGCGTCGA -0.0621215062537  
AGCGTCGC -0.08445143537  
AGCGTCGG -0.279257862779  
AGCGTCTA -0.0526758598346  
AGCGTCTC -0.277463538609  
AGCGTCTG -0.0771552447757  
AGCGTGAA -0.206619489444  
AGCGTGAC -0.158000189777  
AGCGTGAG -0.189688438345  
AGCGTGAT 0.15722502427  
AGCGTGCA -0.198554384572  
AGCGTGCC -0.444852343352  
AGCGTGCG -0.187829965787  
AGCGTGGA 0.121557119325  
AGCGTGGC -0.137222064114  
AGCGTGGG -0.200592515009  
AGCGTGTA -0.093594313899  
AGCGTGTC -0.217353546882  
AGCGTGTG 0.0859830261166  
AGCGTTAA -0.105359136584  
AGCGTTAC 0.0621584928797  
AGCGTTAG -0.136940647199

AGCGTTAT 0.107883365459  
AGCGTTCA -0.0413370510135  
AGCGTTCC -0.165888671352  
AGCGTTCCG -0.0022284183558  
AGCGTTGA -0.0233462040977  
AGCGTTGC -0.28880766587  
AGCGTTGG -0.254096662109  
AGCGTTTA -0.174891706854  
AGCGTTTC 0.0709845769801  
AGCGTTTG 0.189075421706  
AGCTAAAA -0.135539452896  
AGCTAAAC -0.248571695418  
AGCTAAAG -0.152720965833  
AGCTAAAT -0.122453284364  
AGCTAACA -0.0309469248863  
AGCTAACC -0.215787311591  
AGCTAACG -0.337471842422  
AGCTAACT -0.168169397777  
AGCTAAGA 0.00334477671616  
AGCTAAGC -0.238931279887  
AGCTAAGG -0.23598533405  
AGCTAATA 0.112887309037  
AGCTAATC -0.0697762168963  
AGCTAATG -0.129078715503  
AGCTACAA -0.18998817175  
AGCTACAC 0.0317313068116  
AGCTACAG -0.0884328985711  
AGCTACAT -0.00854422319603  
AGCTACCA -0.151736068037  
AGCTACCC -0.228216818273  
AGCTACCG -0.259891840937  
AGCTACCT -0.195340674416  
AGCTACGA -0.0715943408206  
AGCTACGC -0.270986774228  
AGCTACGG -0.086815098735  
AGCTACTA -0.105240013344  
AGCTACTC -0.266459979015  
AGCTACTG -0.225187114915  
AGCTAGAA -0.017916077322  
AGCTAGAC -0.212230354657  
AGCTAGAG -0.259041956442  
AGCTAGAT 0.220301568786  
AGCTAGCA -0.125114083486  
AGCTAGCC -0.223743535776  
AGCTAGCG -0.0921808350773  
AGCTAGCT -0.312696523007  
AGCTAGGA 0.142220973263  
AGCTAGGC -0.119425587162  
AGCTAGGG -0.186095017741  
AGCTAGTA -0.00941575183999  
AGCTAGTC -0.262184185987  
AGCTAGTG -0.0279218541038  
AGCTATAA 0.101310988872  
AGCTATAC -0.0221257928658

AGCTATAG -0.195631337368  
AGCTATAT 0.103708092414  
AGCTATCA -0.0842749934676  
AGCTATCC 0.0380597505164  
AGCTATCG 0.0113239961725  
AGCTATGA 0.00828238707027  
AGCTATGC -0.134466188768  
AGCTATGG -0.137146100593  
AGCTATTA -0.16366947636  
AGCTATTC -0.265053199329  
AGCTATTG -0.0472230535098  
AGCTCAAA -0.111207693082  
AGCTCAAC -0.0487563663329  
AGCTCAAG -0.132491259315  
AGCTCAAT -0.222256198576  
AGCTCACA -0.337105207308  
AGCTCACC -0.165678418141  
AGCTCACG -0.265524598705  
AGCTCACT -0.260154330943  
AGCTCAGA -0.0658270256856  
AGCTCAGC -0.108148209779  
AGCTCAGG -0.146241526011  
AGCTCATA -0.229743062093  
AGCTCATC -0.219390443055  
AGCTCATG -0.133548631474  
AGCTCCAA -0.143447855569  
AGCTCCAC -0.232173726045  
AGCTCCAG -0.251969209476  
AGCTCCAT -0.211123273277  
AGCTCCCA -0.308157849046  
AGCTCCCC -0.125888716818  
AGCTCCCG -0.11968111893  
AGCTCCCT -0.283210538067  
AGCTCCGA -0.298068627532  
AGCTCCGC -0.362714695643  
AGCTCCGG -0.329041700776  
AGCTCCTA -0.203359993824  
AGCTCCTC -0.284030723624  
AGCTCCTG -0.129819845897  
AGCTCGAA -0.187237505748  
AGCTCGAC -0.141939157313  
AGCTCGAG -0.0627698578128  
AGCTCGAT -0.140353634361  
AGCTCGCA -0.25705833864  
AGCTCGCC -0.273458853883  
AGCTCGCG -0.294569732856  
AGCTCGGA 0.195545353021  
AGCTCGGC -0.178302940082  
AGCTCGGG -0.0746768723252  
AGCTCGTA -0.066637819797  
AGCTCGTC -0.246098886105  
AGCTCGTG -0.145879332159  
AGCTCTAA -0.028980771405  
AGCTCTAC -0.133953512741

AGCTCTAG -0.168146011661  
AGCTCTAT -0.192730661832  
AGCTCTCA -0.159562502584  
AGCTCTCC -0.323439821592  
AGCTCTCG -0.09293177475  
AGCTCTGA -0.0448493786649  
AGCTCTGC -0.120526129114  
AGCTCTGG -0.176807158319  
AGCTCTTA -0.124113195706  
AGCTCTTC -0.225734505565  
AGCTCTTG -0.178162345449  
AGCTGAAA -0.0777694089621  
AGCTGAAC -0.224875338014  
AGCTGAAG -0.350209932883  
AGCTGAAT -0.152566185411  
AGCTGACA -0.237267645381  
AGCTGACC -0.200310717407  
AGCTGACG -0.140285134226  
AGCTGACT -0.235814415085  
AGCTGAGA 0.105599509906  
AGCTGAGC -0.143471991309  
AGCTGAGG -0.260095935161  
AGCTGATA 0.204282795192  
AGCTGATC -0.0774621209647  
AGCTGATG -0.166294467466  
AGCTGCAA -0.0207811220565  
AGCTGCAC -0.133347483363  
AGCTGCAG -0.117612754708  
AGCTGCAT -0.213205351949  
AGCTGCCA -0.179728913919  
AGCTGCCC -0.267449666878  
AGCTGCCG -0.202702590948  
AGCTGCCT -0.0653822631755  
AGCTGCGA -0.0818188085095  
AGCTGCGC -0.335498336627  
AGCTGCGG -0.173554933109  
AGCTGCTA -0.264141099415  
AGCTGCTC -0.287290403852  
AGCTGCTG -0.119474431622  
AGCTGGAA -0.191348587094  
AGCTGGAC -0.234212550557  
AGCTGGAG -0.123477449837  
AGCTGGAT -0.0974893493816  
AGCTGGCA -0.11032458236  
AGCTGGCC -0.386738899689  
AGCTGGCG -0.126191037443  
AGCTGGGA 0.155481996745  
AGCTGGGC -0.202468676343  
AGCTGGGG -0.27378361454  
AGCTGGTA -0.0968820397438  
AGCTGGTC -0.41762050456  
AGCTGGTG -0.164830210531  
AGCTGTAA -0.0670115883769  
AGCTGTAC -0.161532982135

AGCTGTAG -0.103957375819  
AGCTGTAT 0.0828470909396  
AGCTGTCA -0.147454192001  
AGCTGTCC -0.0206046582922  
AGCTGTCCG -0.204708772514  
AGCTGTGA 0.0511950944468  
AGCTGTGC -0.175400074432  
AGCTGTGG -0.281465036093  
AGCTGTGA -0.154193371351  
AGCTGTTC 0.0516903997105  
AGCTGTTG -0.037438264711  
AGCTTAAA -0.053991028379  
AGCTTAAC -0.0899867328516  
AGCTTAAG 0.0853784223703  
AGCTTAAT 0.00526559617469  
AGCTTACA -0.228551139059  
AGCTTACC -0.0695361157291  
AGCTTACG -0.222413816869  
AGCTTACT -0.253533366508  
AGCTTAGA 0.0312875429349  
AGCTTAGC -0.125576966027  
AGCTTAGG -0.208058407583  
AGCTTATA 0.156072050011  
AGCTTATC -0.139892547832  
AGCTTATG -0.181562166588  
AGCTTCAA -0.247941271326  
AGCTTCAC -0.096629480804  
AGCTTCAG -0.255829563655  
AGCTTCAT -0.0843321174223  
AGCTTCCA -0.219402712214  
AGCTTCCC -0.177288586576  
AGCTTCCG -0.196264856214  
AGCTTCCT -0.237577216006  
AGCTTCGA -0.135435018155  
AGCTTCGC -0.0493813372601  
AGCTTCGG -0.0917994719412  
AGCTTCTA -0.0199375196164  
AGCTTCTC -0.210647975851  
AGCTTCTG -0.238685272036  
AGCTTGAA -0.134663474522  
AGCTTGAC -0.0978185830569  
AGCTTGAG -0.182181061199  
AGCTTGAT -0.0203771264377  
AGCTTGCA -0.27568502898  
AGCTTGCC -0.363250301071  
AGCTTGCG -0.155072547674  
AGCTTGGA 0.0514521579819  
AGCTTGGC -0.239041490561  
AGCTTGGG -0.260598716878  
AGCTTGTA -0.0174456033809  
AGCTTGTC -0.242198092486  
AGCTTGTG -0.223707030851  
AGCTTTAA -0.242355166853  
AGCTTTAC -0.0980472439106

AGCTTTAG -0.26384355553  
AGCTTTAT 0.0539280161748  
AGCTTTCA 0.0341319280713  
AGCTTTCC -0.00138756085633  
AGCTTTTCG -0.0982839061918  
AGCTTTGA -0.12442035448  
AGCTTTGC -0.160038763858  
AGCTTTGG -0.117895921427  
AGCTTTTA 0.014801131014  
AGCTTTTC -0.0479734020423  
AGCTTTTG -0.033706023341  
AGGAAAAA -0.021511113317  
AGGAAAAC -0.0120267439399  
AGGAAAAG -0.20369359459  
AGGAAAAT 0.211072020321  
AGGAAACA 0.0437267797056  
AGGAAACC -0.240685824532  
AGGAAACG -0.191497948526  
AGGAAACT -0.168310668105  
AGGAAAGA -0.168555045555  
AGGAAAGC -0.146352120636  
AGGAAAGG -0.30349101893  
AGGAAATA 0.295405940016  
AGGAAATC 0.489766647446  
AGGAAATG -0.0280498859262  
AGGAACAA -0.140050913539  
AGGAACAC -0.159103815245  
AGGAACAG -0.148494932026  
AGGAACAT -0.041622851649  
AGGAACCA -0.0218055521086  
AGGAACCC -0.312953115555  
AGGAACCG -0.379309596448  
AGGAACCT -0.168296477711  
AGGAACGA -0.207390960387  
AGGAACGC -0.201693910998  
AGGAACGG -0.112005856515  
AGGAACTA -0.0727426893328  
AGGAACTC -0.228062123204  
AGGAACTG -0.0485360161483  
AGGAAGAA -0.120861519152  
AGGAAGAC -0.139032058889  
AGGAAGAG -0.148754235489  
AGGAAGAT 0.278276388108  
AGGAAGCA -0.0581922817014  
AGGAAGCC -0.249458432844  
AGGAAGCG -0.165477575363  
AGGAAGGA 0.0775537685318  
AGGAAGGC -0.282550960401  
AGGAAGGG -0.305714710916  
AGGAAGTA -0.0606239848664  
AGGAAGTC -0.336711069217  
AGGAAGTG 0.00909980073429  
AGGAATAA 0.105585157453  
AGGAATAC 0.13992321336



AGGAATAG -0.0771446377507  
AGGAATAT 0.355413385108  
AGGAATCA 0.345871988205  
AGGAATCC 0.430192063266  
AGGAATCG 0.305833613096  
AGGAATGA -0.254887935145  
AGGAATGC -0.0334298243437  
AGGAATGG 0.00545636151575  
AGGAATTA 0.192719137537  
AGGAATTC 0.121684196696  
AGGAATTG 0.0907119240453  
AGGACAAA 0.116790873193  
AGGACAAC -0.0866362229999  
AGGACAAG 0.0355634548149  
AGGACAAT 0.134924180379  
AGGACACA -0.131065512079  
AGGACACC -0.150891530256  
AGGACACG -0.277821397247  
AGGACACT -0.165788471166  
AGGACAGA -0.110720504673  
AGGACAGC -0.161526472704  
AGGACAGG -0.0917282924287  
AGGACATA -0.0924541798355  
AGGACATC -0.237352787926  
AGGACATG -0.295305750586  
AGGACCAA -0.125292059911  
AGGACCAC -0.336263039674  
AGGACCAG -0.348704866021  
AGGACCAT -0.0956495245028  
AGGACCCA -0.267276431169  
AGGACCCC -0.345211222186  
AGGACCCG -0.287797596897  
AGGACCCT -0.341610790044  
AGGACCGA -0.118835410237  
AGGACCGC -0.335544486416  
AGGACCGG -0.277579310934  
AGGACCTA -0.176784842997  
AGGACCTC -0.37930166485  
AGGACCTG -0.211998949189  
AGGACGAA -0.141626349088  
AGGACGAC -0.152326680947  
AGGACGAG -0.273617227967  
AGGACGAT 0.181282891616  
AGGACGCA -0.00274811500478  
AGGACGCC -0.354006994568  
AGGACGCG -0.237842182025  
AGGACGGA -0.176160453016  
AGGACGGC -0.27472454514  
AGGACGGG -0.127560039199  
AGGACGTA -0.0811062309238  
AGGACGTC -0.275031176751  
AGGACGTG -0.133071669603  
AGGACTAA -0.228543873577  
AGGACTAC -0.23351321176

AGGACTAG -0.0924249875593  
AGGACTAT -0.125043247228  
AGGACTCA -0.228379583479  
AGGACTCC -0.217340326024  
AGGACTCG -0.291374809449  
AGGACTGA -0.0603835962423  
AGGACTGC -0.213841578386  
AGGACTGG -0.12093214334  
AGGACTTA -0.076648273618  
AGGACTTC -0.105161142681  
AGGACTTG -0.171740478849  
AGGAGAAA 0.043680252479  
AGGAGAAC -0.11227909611  
AGGAGAAG -0.226742412633  
AGGAGAAT 0.225830821223  
AGGAGACA -0.139340397548  
AGGAGACC -0.307285852497  
AGGAGACG -0.278814215739  
AGGAGACT -0.288246903779  
AGGAGAGA -0.0037213522062  
AGGAGAGC -0.273650467953  
AGGAGAGG -0.271716269595  
AGGAGATA 0.192279055915  
AGGAGATC 0.388251606819  
AGGAGATG 0.0187017643993  
AGGAGCAA -0.183963840878  
AGGAGCAC -0.165459522357  
AGGAGCAG -0.373181825897  
AGGAGCAT -0.217277706106  
AGGAGCCA -0.176121397014  
AGGAGCCC -0.395226915117  
AGGAGCCG -0.0789186344027  
AGGAGCCT -0.373221987956  
AGGAGCGA -0.086628109814  
AGGAGCGC -0.215162688863  
AGGAGCGG -0.181294114729  
AGGAGCTA -0.130232500434  
AGGAGCTC -0.296104043631  
AGGAGCTG -0.175614615031  
AGGAGGAA -0.100102469336  
AGGAGGAC -0.33160829013  
AGGAGGAG -0.226445582784  
AGGAGGAT 0.204146624526  
AGGAGGCA -0.0869655010355  
AGGAGGCC -0.334305786354  
AGGAGGCG -0.254885178662  
AGGAGGGA -0.0841488062249  
AGGAGGGC -0.28549041984  
AGGAGGGG -0.131731614981  
AGGAGGTA -0.0991836521444  
AGGAGGTC -0.304226550336  
AGGAGGTG -0.377695267767  
AGGAGTAA -0.106693689595  
AGGAGTAC -0.0969729215292

AGGAGTAG -0.240284427795  
AGGAGTAT 0.0067593781555  
AGGAGTCA -0.17166304171  
AGGAGTCC -0.178417278401  
AGGAGTCG -0.280087482119  
AGGAGTGA -0.0831585369948  
AGGAGTGC -0.0365893882674  
AGGAGTGG -0.264177286021  
AGGAGTTA 2.93914404288E-5  
AGGAGTTC -0.0190484068881  
AGGAGTTG -0.0258074640701  
AGGATAAA 0.111842076451  
AGGATAAC 0.099664240929  
AGGATAAG -0.0321074356238  
AGGATAAT 0.28875018269  
AGGATACA 0.0125318423684  
AGGATACC 0.181002605782  
AGGATACG 0.3649606213  
AGGATACT 0.164078591458  
AGGATAGA 0.0253738587072  
AGGATAGC -0.0128910396934  
AGGATAGG -0.149347345956  
AGGATATA 0.179230381816  
AGGATATC 0.464460328097  
AGGATATG 0.318441931928  
AGGATCAA -0.0367794865806  
AGGATCAC 0.250945599731  
AGGATCAG 0.1594362958  
AGGATCAT 0.161169463442  
AGGATCCA 0.256196968318  
AGGATCCC 0.294016189427  
AGGATCCG 0.296948463615  
AGGATCCT 0.29019236547  
AGGATCGA 0.00524232573144  
AGGATCGC 0.346169791902  
AGGATCGG 0.137866516654  
AGGATCTA 0.285438275074  
AGGATCTC 0.394224803316  
AGGATCTG 0.354216331029  
AGGATGAA -0.210767498697  
AGGATGAC -0.0897504389979  
AGGATGAG 0.144010715094  
AGGATGAT 0.118166025561  
AGGATGCA -0.162531325212  
AGGATGCC -0.272984987281  
AGGATGCG -0.00981559898582  
AGGATGGA -0.173241212815  
AGGATGGC -0.220730883338  
AGGATGGG -0.214760247232  
AGGATGTA -0.0756837441516  
AGGATGTC -0.206444516124  
AGGATGTG -0.0324613329635  
AGGATTAA -0.174963546372  
AGGATTAC 0.454795150471

AGGATTAG -0.152816678367  
AGGATTAT 0.358613315037  
AGGATTCA 0.14065020474  
AGGATTCC 0.451378375621  
AGGATTCT 0.33400756128  
AGGATTGA -0.0588578301224  
AGGATTGC 0.442226082641  
AGGATTGG 0.010644897149  
AGGATTTA 0.256811908327  
AGGATTTT 0.477825303096  
AGGATTTG 0.39553465311  
AGGCAAAA -0.0621278366167  
AGGCAAAC 0.0135282293675  
AGGCAAAG 0.0531206137267  
AGGCAAAT 0.243748677036  
AGGCAACA -0.144704130566  
AGGCAACC -0.196370824339  
AGGCAACG -0.281627398605  
AGGCAACT -0.0660066175193  
AGGCAAGA 0.014178573983  
AGGCAAGC -0.443635444828  
AGGCAAGG -0.163714472368  
AGGCAATA 0.00535071213884  
AGGCAATC 0.411845730028  
AGGCAATG 0.0303139347314  
AGGCACAA -0.205253450573  
AGGCACAC -0.170103135416  
AGGCACAG -0.0454148707447  
AGGCACAT -0.154372539776  
AGGCACCA -0.0400788037709  
AGGCACCC -0.35653970065  
AGGCACCG -0.281713506731  
AGGCACCT -0.210707087807  
AGGCACGA -0.0335470300679  
AGGCACGC -0.138702137102  
AGGCACGG -0.206302656523  
AGGCACTA -0.185081806779  
AGGCACTC -0.212957220003  
AGGCACTG -0.278311183886  
AGGCAGAA -0.113279300886  
AGGCAGAC -0.378308157849  
AGGCAGAG -0.00649101763384  
AGGCAGAT 0.17462779584  
AGGCAGCA 0.0223637438596  
AGGCAGCC -0.171121335846  
AGGCAGCG -0.146778551607  
AGGCAGGA -0.0981533081211  
AGGCAGGC -0.305348130139  
AGGCAGGG -0.305235114298  
AGGCAGTA -0.139388625579  
AGGCAGTC -0.357760086149  
AGGCAGTG -0.0358802361992  
AGGCATAA -0.0714557532739  
AGGCATAC -0.105533360354

AGGCATAG -0.195052470699  
AGGCATAT 0.110509856583  
AGGCATCA 0.0804344289193  
AGGCATCC -0.288749556733  
AGGCATCG -0.277553090892  
AGGCATGA -0.14577320156  
AGGCATGC -0.299752792034  
AGGCATGG -0.125400824052  
AGGCATTA 0.0549498916082  
AGGCATTC -0.238210414031  
AGGCATTG -0.0531794076044  
AGGCCAAA -0.221532823813  
AGGCCAAC -0.0701378801924  
AGGCCAAG -0.13604190963  
AGGCCAAT -0.0987481214929  
AGGCCACA -0.13827638199  
AGGCCACC -0.250898617814  
AGGCCACG -0.28535710643  
AGGCCACT -0.376168230738  
AGGCCAGA -0.0736297645687  
AGGCCAGC -0.453590038219  
AGGCCAGG -0.325963592266  
AGGCCATA -0.0874894731234  
AGGCCATC -0.189024755127  
AGGCCATG -0.0595264337277  
AGGCCCAA -0.418877126031  
AGGCCCAC -0.303509555352  
AGGCCCAG -0.336141020048  
AGGCCCAT -0.229492448612  
AGGCCCCA -0.328988167589  
AGGCCCCC -0.351796397415  
AGGCCCCG -0.268321706179  
AGGCCCCCT -0.366932430204  
AGGCCCGA -0.268995619947  
AGGCCCGC -0.255097537697  
AGGCCCGG -0.32710994667  
AGGCCCTA -0.174088374652  
AGGCCCTC -0.325341611282  
AGGCCCTG -0.188759086511  
AGGCCGAA -0.202146321103  
AGGCCGAC -0.243346027029  
AGGCCGAG -0.0343912177106  
AGGCCGAT -0.141977299732  
AGGCCGCA -0.224098485887  
AGGCCGCC -0.239526569809  
AGGCCGCG -0.290546865514  
AGGCCGGA 0.051336115478  
AGGCCGGC -0.309273274009  
AGGCCGGG -0.239027404676  
AGGCCGTA -0.323558138654  
AGGCCGTC -0.344647015861  
AGGCCGTG 0.0178052956796  
AGGCCTAA -0.331376326837  
AGGCCTAC -0.328018508873

AGGCCTAG -0.32043904254  
AGGCCTAT -0.261101016514  
AGGCCTCA -0.194402811364  
AGGCCTCC -0.176336356336  
AGGCCTCG -0.396644865042  
AGGCCTGA -0.126286586799  
AGGCCTGC -0.186478337583  
AGGCCTGG -0.0713764504487  
AGGCCTTA -0.0659580555551  
AGGCCTTC -0.184046998113  
AGGCCTTG -0.0676917979281  
AGGCGAAA -0.0771860014284  
AGGCGAAC -0.0655720117878  
AGGCGAAG -0.0718058124309  
AGGCGAAT 0.280678750376  
AGGCGACA 0.00759326438107  
AGGCGACC -0.184134941658  
AGGCGACG -0.116985160935  
AGGCGACT -0.267046785802  
AGGCGAGA -0.0217801938256  
AGGCGAGC -0.356796651245  
AGGCGAGG -0.19425077262  
AGGCGATA 0.0128558310376  
AGGCGATC 0.315358057782  
AGGCGATG -0.113102354021  
AGGCGCAA 0.181292863111  
AGGCGCAC -0.225447376757  
AGGCGCAG -0.129012606027  
AGGCGCAT -0.141665195191  
AGGCGCCA -0.163947071521  
AGGCGCCC -0.229222081987  
AGGCGCCG -0.259665401378  
AGGCGCCT -0.274217460436  
AGGCGCGA 0.0613754250118  
AGGCGCGC -0.119797052295  
AGGCGCGG -0.126042450658  
AGGCGCTA -0.065739093116  
AGGCGCTC -0.0390997783342  
AGGCGCTG 0.0722234630094  
AGGCGGAA -0.144160760021  
AGGCGGAC -0.27791722551  
AGGCGGAG -0.137021620052  
AGGCGGAT 0.166062786946  
AGGCGGCA -0.109702094867  
AGGCGGCC -0.152900114962  
AGGCGGCG -0.262157665448  
AGGCGGGA -0.0717365633069  
AGGCGGGC -0.325709520245  
AGGCGGGG -0.244748136436  
AGGCGGTA -0.179521771492  
AGGCGGTC -0.289316485617  
AGGCGGTG -0.0829990101276  
AGGCGTAA 0.0665496375992  
AGGCGTAC -0.232035791963

AGGCGTAG -0.303603178935  
AGGCGTAT 0.131714358987  
AGGCGTCA -0.228628184026  
AGGCGTCC -0.307363629598  
AGGCGTCG -0.310231993475  
AGGCGTGA -0.0766988930719  
AGGCGTGC -0.359246030762  
AGGCGTGG -0.15551805302  
AGGCGTTA -0.116930549406  
AGGCGTTC -0.206928211618  
AGGCGTTG -0.0493620342105  
AGGCTAAA -0.191786109112  
AGGCTAAC -0.067535260785  
AGGCTAAG -0.0642898301393  
AGGCTAAT -0.0935461267272  
AGGCTACA -0.153121372781  
AGGCTACC -0.0747340701176  
AGGCTACG -0.282144048338  
AGGCTACT -0.314603849875  
AGGCTAGA -0.107448088516  
AGGCTAGC -0.33326546845  
AGGCTAGG -0.342147500201  
AGGCTATA -0.175208885192  
AGGCTATC -0.183601428  
AGGCTATG 0.0755866058896  
AGGCTCAA -0.181323542788  
AGGCTCAC -0.196600648844  
AGGCTCAG -0.204727481259  
AGGCTCAT -0.254306803473  
AGGCTCCA -0.176447329248  
AGGCTCCC -0.372009784469  
AGGCTCCG -0.336648237237  
AGGCTCGA -0.188289737373  
AGGCTCGC -0.367413249994  
AGGCTCGG -0.164080274001  
AGGCTCTA -0.246039924046  
AGGCTCTC -0.100278492579  
AGGCTCTG -0.00845559952646  
AGGCTGAA -0.207833650766  
AGGCTGAC -0.184188617348  
AGGCTGAG -0.232758557788  
AGGCTGAT -0.020218170885  
AGGCTGCA -0.132688091988  
AGGCTGCC -0.327669488495  
AGGCTGCG -0.255357069015  
AGGCTGGA -0.230295963681  
AGGCTGGC -0.178652885579  
AGGCTGGG -0.260223327427  
AGGCTGTA -0.224613460183  
AGGCTGTC -0.253242475115  
AGGCTGTG -0.167753531703  
AGGCTTAA -0.153582609076  
AGGCTTAC -0.356250086127  
AGGCTTAG -0.0599750764387

AGGCTTAT -0.0628256315555  
AGGCTTCA -0.241812795085  
AGGCTTCC -0.333025855552  
AGGCTTCG -0.389412516915  
AGGCTTGA -0.196307508223  
AGGCTTGC -0.447175685671  
AGGCTTGG -0.215952086686  
AGGCTTTA -0.0866555260495  
AGGCTTTC -0.065182262152  
AGGCTTTG -0.0535883973183  
AGGGAAAA -0.156566688609  
AGGGAAAC 0.0958541053846  
AGGGAAAG -0.171775952442  
AGGGAAAT 0.367979533295  
AGGGAAACA -0.105651778052  
AGGGAAACC -0.320238656379  
AGGGAAACG -0.303896152224  
AGGGAAACT -0.207595229296  
AGGGAAGA -0.100741807927  
AGGGAAGC -0.212798046853  
AGGGAAGG -0.339424860598  
AGGGAATA 0.183084312022  
AGGGAATC 0.467496985744  
AGGGAATG -0.0328767236602  
AGGGACAA -0.22410775079  
AGGGACAC -0.228939796096  
AGGGACAG -0.314670106588  
AGGGACAT -0.116082705834  
AGGGACCA -0.0717351036298  
AGGGACCC -0.445379992229  
AGGGACCG -0.262613733775  
AGGGACCT -0.336912272578  
AGGGACGA 0.0119335905284  
AGGGACGC -0.336470442289  
AGGGACGG -0.057755448042  
AGGGACTA -0.102967245339  
AGGGACTC -0.101433614058  
AGGGACTG -0.166169958072  
AGGGAGAA -0.137170492344  
AGGGAGAC -0.251398249871  
AGGGAGAG -0.177870418621  
AGGGAGAT 0.275623891448  
AGGGAGCA -0.264374326451  
AGGGAGCC -0.264228710015  
AGGGAGCG 0.0219517250338  
AGGGAGGA -0.0210801942186  
AGGGAGGC -0.40737522779  
AGGGAGGG -0.274304304114  
AGGGAGTA -0.0266023599357  
AGGGAGTC -0.329959974961  
AGGGAGTG -0.188154873889  
AGGGATAA 0.00600324842749  
AGGGATAC 0.083439778691  
AGGGATAG -0.156038311704



AGGGATAT 0.356283280526  
AGGGATCA 0.146527448304  
AGGGATCC 0.0831624125019  
AGGGATCG 0.00248454913252  
AGGGATGA -0.22030895997  
AGGGATGC -0.168289340535  
AGGGATGG -0.282927444997  
AGGGATTA 0.197936541536  
AGGGATTC 0.366245264702  
AGGGATTG 0.27933305206  
AGGGCAAA -0.116500263323  
AGGGCAAC -0.0127937855211  
AGGGCAAG -0.189441537687  
AGGGCAAT 0.254243492071  
AGGGCACA -0.165758269994  
AGGGCACC -0.310179463346  
AGGGCACG -0.23420210495  
AGGGCACT -0.26293710478  
AGGGCAGA -0.149563629516  
AGGGCAGC -0.308828270774  
AGGGCAGG -0.357430313678  
AGGGCATA -0.213483924915  
AGGGCATC -0.324784098395  
AGGGCATG -0.272681872128  
AGGGCCAA -0.184694893151  
AGGGCCAC -0.314258304091  
AGGGCCAG -0.125230765638  
AGGGCCAT -0.351456795023  
AGGGCCCA -0.157750279122  
AGGGCCCC -0.305812124258  
AGGGCCCCG -0.439629980319  
AGGGCCCCT -0.209810244326  
AGGGCCGA -0.0507700223439  
AGGGCCGC -0.381543222215  
AGGGCCGG -0.363473520893  
AGGGCCTA -0.289634205166  
AGGGCCTC -0.1955820703  
AGGGCCTG -0.11068616505  
AGGGCGAA -0.166378571212  
AGGGCGAC -0.139341663841  
AGGGCGAG -0.116703748735  
AGGGCGAT 0.0750574804931  
AGGGCGCA -0.141573814428  
AGGGCGCC -0.260648862089  
AGGGCGCG -0.136972954984  
AGGGCGGA -0.016963781004  
AGGGCGGC -0.232046250907  
AGGGCGGG 0.0116282125209  
AGGGCGTA -0.0490063065821  
AGGGCGTC -0.376817398587  
AGGGCGTG -0.244289618802  
AGGGCTAA -0.165086071645  
AGGGCTAC -0.0976864603754  
AGGGCTAG -0.299248969917

AGGGCTAT -0.0896862132034  
AGGGCTCA -0.323516371078  
AGGGCTCC -0.337940950333  
AGGGCTCG -0.422893777436  
AGGGCTGA -0.0774269212412  
AGGGCTGC -0.266820754119  
AGGGCTGG -0.0338102523811  
AGGGCTTA -0.148405971822  
AGGGCTTC -0.415844708463  
AGGGCTTG -0.227739872362  
AGGGGAAA -0.048825642595  
AGGGGAAC -0.213341303171  
AGGGGAAG -0.0528285811185  
AGGGGAAT 0.355516673698  
AGGGGACA -0.23808637533  
AGGGGACC -0.214586303353  
AGGGGACG -0.264463612017  
AGGGGACT -0.350913458241  
AGGGGAGA 0.0913268640541  
AGGGGAGC -0.319725550016  
AGGGGAGG -0.229681035372  
AGGGGATA 0.194570603662  
AGGGGATC 0.280256528492  
AGGGGATG -0.130614906541  
AGGGGCAA -0.187155493353  
AGGGGCAC -0.26566319301  
AGGGGCAG -0.231278650205  
AGGGGCAT -0.20645157053  
AGGGGCCA -0.219469727931  
AGGGGCCC -0.415847586296  
AGGGGCCG -0.256060746523  
AGGGGCGA -0.119028506125  
AGGGGCGC -0.215460648744  
AGGGGCGG -0.400378152071  
AGGGGCTA -0.239480785987  
AGGGGCTC -0.265184490188  
AGGGGCTG -0.115316508299  
AGGGGGAA -0.0588312336457  
AGGGGGAC -0.315679934282  
AGGGGGAG -0.0606650035253  
AGGGGGAT -0.0457523639342  
AGGGGGCA -0.174281831389  
AGGGGGCC -0.221468323865  
AGGGGGCG -0.179575280955  
AGGGGGGA -0.0464833013923  
AGGGGGGC -0.249493054694  
AGGGGGGG -0.415993629222  
AGGGGGTA -0.164656990448  
AGGGGGTC -0.317147317813  
AGGGGGTG -0.237983172428  
AGGGGTAA 0.0303051757991  
AGGGGTAC -0.315120340277  
AGGGGTAG -0.21003046217  
AGGGGTAT 0.0158616964592

AGGGGTCA -0.219457574878  
AGGGGTCC -0.307787396952  
AGGGGTCCG -0.297997134777  
AGGGGTGA -0.0118544849383  
AGGGGTGC -0.183383095276  
AGGGGTGG -0.0286673663039  
AGGGGTTA -0.0582659861638  
AGGGGTTC -0.172085205885  
AGGGGTTG 0.134332094918  
AGGGTAAA -0.0459332106171  
AGGGTAAC -0.0955180931257  
AGGGTAAG -0.149075291582  
AGGGTAAT 0.308363320511  
AGGGTACA -0.0963878342721  
AGGGTACC -0.413559474689  
AGGGTACG 0.0079553002489  
AGGGTACT -0.0780113904261  
AGGGTAGA -0.0455332109272  
AGGGTAGC -0.290786595235  
AGGGTAGG -0.21430697859  
AGGGTATA -0.0719028050481  
AGGGTATC 0.265529221988  
AGGGTATG -0.0228272349484  
AGGGTCAA -0.21594141142  
AGGGTCAC -0.088719906931  
AGGGTCAG -0.213835225241  
AGGGTCAT -0.301644811255  
AGGGTCCA -0.279507557276  
AGGGTCCC -0.442103508235  
AGGGTCCG -0.237819337008  
AGGGTCGA -0.238823295933  
AGGGTCGC -0.410127284676  
AGGGTCGG -0.233456272517  
AGGGTCTA -0.225034844604  
AGGGTCTC -0.337325559079  
AGGGTCTG -0.221800011968  
AGGGTGAA 0.0554987846981  
AGGGTGAC 0.0281066837952  
AGGGTGAG -0.246146161832  
AGGGTGAT -0.0770649791124  
AGGGTGCA -0.146870270203  
AGGGTGCC -0.426257935275  
AGGGTGCG 0.0542812931104  
AGGGTGGA -0.0552991389364  
AGGGTGGC -0.250126589298  
AGGGTGGG -0.220673970052  
AGGGTGTA 0.0401158734492  
AGGGTGTC -0.117292068139  
AGGGTGTG -0.117008630633  
AGGGTTAA -0.0542072335134  
AGGGTTAC 0.0576857206682  
AGGGTTAG -0.220950104884  
AGGGTTAT -0.162869152127  
AGGGTTCA -0.164932513977

AGGGTTCC -0.408051773407  
AGGGTTCCG -0.33027807407  
AGGGTTGA -0.0297723407517  
AGGGTTGC -0.302969156171  
AGGGTTGG -0.33340086719  
AGGGTTTA -0.182493049322  
AGGGTTTC -0.319099590723  
AGGGTTTG 0.0816946423007  
AGGTAAAA 0.124958291625  
AGGTAAAC 0.140256052787  
AGGTAAAG -0.0097552608337  
AGGTAAAT 0.152355430036  
AGGTAACA -0.162787523883  
AGGTAACC -0.137745410232  
AGGTAACG -0.0271650985745  
AGGTAACT -0.0907699322564  
AGGTAAGA 0.0207383692232  
AGGTAAGC 0.147739100604  
AGGTAAGG -0.0357208024535  
AGGTAATA -0.0540637796253  
AGGTAATC 0.415242731911  
AGGTAATG -0.154715149923  
AGGTACAA -0.0677250909131  
AGGTACAC -0.0448605010877  
AGGTACAG -0.29662097778  
AGGTACAT -0.0709871343288  
AGGTACCA -0.0183390144741  
AGGTACCC -0.375629751864  
AGGTACCG -0.0599506993904  
AGGTACCT -0.347308681167  
AGGTACGA -0.218003511983  
AGGTACGC -0.108107172664  
AGGTACGG -0.111640353732  
AGGTACTA 0.0107035410066  
AGGTACTC -0.186049277676  
AGGTACTG -0.00819965971481  
AGGTAGAA 0.147011564136  
AGGTAGAC -0.160089841908  
AGGTAGAG -0.127776537175  
AGGTAGAT 0.194884967612  
AGGTAGCA -0.0923168347411  
AGGTAGCC -0.231868375622  
AGGTAGCG -0.0463846655701  
AGGTAGGA 0.080257366627  
AGGTAGGC -0.288179715214  
AGGTAGGG -0.171749782905  
AGGTAGTA -0.0210791478734  
AGGTAGTC -0.18267123231  
AGGTAGTG -0.0368407991066  
AGGTATAA -0.0471926501284  
AGGTATAC -0.0897681072677  
AGGTATAG -0.164387054449  
AGGTATAT -0.0733420941597  
AGGTATCA 0.0808120990051

AGGTATCC 0.144071068313  
AGGTATCG -0.0177711740328  
AGGTATGA -0.0235073706398  
AGGTATGC -0.0703319519236  
AGGTATGG -0.143840235417  
AGGTATTA 0.000760911735545  
AGGTATTG -0.0607464394535  
AGGTATTG 0.0987299548185  
AGGTCAAA 0.0162903950783  
AGGTCAAC 0.046097530711  
AGGTCAAG -0.112184113021  
AGGTCAAT 0.0234264943103  
AGGTCACA -0.308382473329  
AGGTCACC -0.356413555748  
AGGTCACG -0.307705384751  
AGGTCACT -0.155922563055  
AGGTCAGA -0.102413190669  
AGGTCAGC -0.248531491392  
AGGTCAGG -0.20996429999  
AGGTCATA -0.204284891238  
AGGTCATC -0.394687542403  
AGGTCATG -0.289483767639  
AGGTCCAA -0.328673497234  
AGGTCCAC -0.149558969099  
AGGTCCAG -0.303606645829  
AGGTCCAT -0.353747328027  
AGGTCCCA -0.212509683591  
AGGTCCCC -0.427936082798  
AGGTCCCG -0.323403199802  
AGGTCCGA -0.0575410757429  
AGGTCCGC -0.141296705297  
AGGTCCGG -0.1312883036  
AGGTCCTA -0.328555754469  
AGGTCCTC -0.320263302681  
AGGTCCTG -0.149923885392  
AGGTCGAA -0.117857961238  
AGGTCGAC -0.259630013177  
AGGTCGAG -0.321571205318  
AGGTCGAT -0.144887391595  
AGGTCGCA -0.22960643733  
AGGTCGCC -0.116473996366  
AGGTCGCG -0.256861383206  
AGGTCGGA 0.0888148434706  
AGGTCGGC -0.356035112379  
AGGTCGGG -0.164955070603  
AGGTCGTA -0.137737715971  
AGGTCGTC -0.370580062724  
AGGTCGTG -0.144674116534  
AGGTCTAA -0.202430874337  
AGGTCTAC -0.0845381153876  
AGGTCTAG -0.286726946106  
AGGTCTAT -0.218105329218  
AGGTCTCA -0.342505920583  
AGGTCTCC -0.317455441253

AGGTCTCG -0.283151809859  
AGGTCTGA 0.000460573856047  
AGGTCTGC -0.0637239090361  
AGGTCTGG -0.137733871803  
AGGTCTTA -0.130191008989  
AGGTCTTC -0.236279347305  
AGGTCTTG -0.0587292133685  
AGGTGAAA 0.0194314567279  
AGGTGAAC -0.309965147719  
AGGTGAAG -0.0666029792478  
AGGTGAAT 0.00272042583815  
AGGTGACA -0.0198367918951  
AGGTGACC -0.186878837252  
AGGTGACG 0.0150026059117  
AGGTGACT -0.187813095346  
AGGTGAGA 0.0378881792852  
AGGTGAGC -0.127167330544  
AGGTGAGG -0.241399605784  
AGGTGATA -0.0750193700661  
AGGTGATC 0.0477226537833  
AGGTGATG -0.218040762483  
AGGTGCAA -0.128107981415  
AGGTGCAC -0.143170822479  
AGGTGCAG -0.111629458685  
AGGTGCAT -0.298084794959  
AGGTGCCA -0.326174141791  
AGGTGCCC -0.383003877411  
AGGTGCCG -0.288561986114  
AGGTGCGA -0.027298047293  
AGGTGCGC -0.317321051979  
AGGTGCGG -0.105810718786  
AGGTGCTA -0.168841964219  
AGGTGCTC -0.265539192579  
AGGTGCTG -0.0221418467876  
AGGTGGAA -0.0449165346744  
AGGTGGAC -0.0856429075017  
AGGTGGAG -0.101820372622  
AGGTGGAT 0.165905126165  
AGGTGGCA -0.284399901874  
AGGTGGCC -0.336494139243  
AGGTGGCG -0.183975313237  
AGGTGGGA -0.237939651184  
AGGTGGGC -0.217803497394  
AGGTGGGG -0.236689628178  
AGGTGGTA -0.0430699637854  
AGGTGGTC -0.286990868222  
AGGTGGTG -0.316460139021  
AGGTGTAA 0.0642985920016  
AGGTGTAC -0.136755741922  
AGGTGTAG -0.266179296124  
AGGTGTAT 0.019238404844  
AGGTGTCA -0.138792442917  
AGGTGTCC -0.194871461749  
AGGTGTCG -0.289919719097

AGGTGTGA 0.145708555154  
AGGTGTGC -0.20148556209  
AGGTGTGG -0.00349247318944  
AGGTGTTA 0.0482230316124  
AGGTGTTC -0.0309079337832  
AGGTGTTG 0.0364388167854  
AGGTTAAA -0.0896085811584  
AGGTTAAC -0.0665773742181  
AGGTTAAG -0.078646199031  
AGGTTAAT -0.091629211925  
AGGTTACA 0.0417414217207  
AGGTTACC -0.254441136335  
AGGTTACG -0.0210805602797  
AGGTTACT -0.0332771816323  
AGGTTAGA 0.0789435267841  
AGGTTAGC -0.386727533521  
AGGTTAGG -0.242452312621  
AGGTTATA 0.00891878280038  
AGGTTATC -0.197987351066  
AGGTTATG -0.0263863289307  
AGGTTCAA -0.0830548999172  
AGGTTCAC -0.12647839712  
AGGTTCAG -0.227773537657  
AGGTTCAT -0.0956329806741  
AGGTTCCA -0.158704360796  
AGGTTCCC -0.327901302666  
AGGTTCCG -0.257991339557  
AGGTTCGA 0.00885596340142  
AGGTTCGC -0.074233989815  
AGGTTCGG 0.0486230031685  
AGGTTCTA -0.000295613964658  
AGGTTCTC -0.203336172512  
AGGTTCTG -0.0466166719561  
AGGTTGAA 0.0495350274124  
AGGTTGAC -0.139184595151  
AGGTTGAG -0.231409186916  
AGGTTGAT -0.0349167536477  
AGGTTGCA -0.118616918022  
AGGTTGCC -0.302483838509  
AGGTTGCG -0.0126515477763  
AGGTTGGA 0.0595934314703  
AGGTTGGC -0.147462826608  
AGGTTGGG -0.126055807874  
AGGTTGTA -0.12576059596  
AGGTTGTC -0.25855851385  
AGGTTGTG -0.074970153657  
AGGTTTAA -0.140373008192  
AGGTTTAC -0.241556740961  
AGGTTTAG -0.227096822207  
AGGTTTAT -0.0776740928256  
AGGTTTCA -0.156768099969  
AGGTTTCC -0.112127278794  
AGGTTTCG -0.115042832604  
AGGTTTGA 0.0432479580739

AGGTTTGC -0.107993978046  
AGGTTTGG -0.043748776446  
AGGTTTTA 0.0567799204163  
AGGTTTTTC -0.037124001834  
AGGTTTTTG 0.127202960536  
AGTAAAAA 0.166982474836  
AGTAAAAC 0.102351662958  
AGTAAAAG 0.184798143106  
AGTAAAAT 0.301423590746  
AGTAAACA -0.154078320745  
AGTAAACC -0.209162813907  
AGTAAACG 0.0470890373469  
AGTAAACT -0.0910437129516  
AGTAAAGA 0.0505174596084  
AGTAAAGC -0.167127460955  
AGTAAAGG -0.131145543099  
AGTAAATA 0.175177915812  
AGTAAATC 0.193073238528  
AGTAAATG 0.0130006039097  
AGTAACAA 0.0299635774399  
AGTAACAC -0.0947892445149  
AGTAACAG -0.197467337865  
AGTAACAT 0.0476741385225  
AGTAACCA 0.076921273891  
AGTAACCC 0.0584125895053  
AGTAACCG -0.000809349294198  
AGTAACGA -0.0325656234747  
AGTAACGC -0.0887650736136  
AGTAACGG -0.240685557013  
AGTAACTA 0.0828531642825  
AGTAACTC -0.210788570483  
AGTAACTG 0.0633497076706  
AGTAAGAA 0.229200090509  
AGTAAGAC 0.0834660554878  
AGTAAGAG -0.0512215555403  
AGTAAGAT 0.202902856142  
AGTAAGCA -0.0024831994529  
AGTAAGCC -0.128144223823  
AGTAAGCG 0.127459415338  
AGTAAGGA -0.0197511561148  
AGTAAGGC -0.339659879729  
AGTAAGGG -0.234935929243  
AGTAAGTA 0.172495751304  
AGTAAGTC -0.196148383816  
AGTAAGTG -0.021947694576  
AGTAATAA 0.106493545887  
AGTAATAC 0.229401545952  
AGTAATAG -0.101136667521  
AGTAATAT 0.299361344816  
AGTAATCA 0.316984072452  
AGTAATCC 0.362234134961  
AGTAATCG 0.302209975063  
AGTAATGA -0.026893284469  
AGTAATGC -0.0825837046811



AGTAATGG -0.149505728585  
AGTAATTA 0.291733875971  
AGTAATTC 0.168176609271  
AGTAATTG 0.10672977964  
AGTACAAA 0.121862294986  
AGTACAAC 0.0311460332985  
AGTACAAG -0.166625795707  
AGTACAAT 0.173271388218  
AGTACACA -0.264306030036  
AGTACACC -0.0348513049593  
AGTACACG -0.168566208393  
AGTACACT -0.175785201784  
AGTACAGA -0.0196119792997  
AGTACAGC 0.0304613767582  
AGTACAGG -0.206294467738  
AGTACATA 0.191279752998  
AGTACATC -0.0905180026009  
AGTACATG -0.112369820748  
AGTACCAA -0.0323194810386  
AGTACCAC -0.209355695041  
AGTACCAG -0.298098577379  
AGTACCAT -0.227447656067  
AGTACCCA -0.126594253244  
AGTACCCC -0.282155508691  
AGTACCCG -0.168653403372  
AGTACCGA -0.0887242616954  
AGTACCGC -0.148290852187  
AGTACCGG -0.219398204426  
AGTACCTA -0.141828281575  
AGTACCTC -0.194005409027  
AGTACCTG 0.0426613643696  
AGTACGAA 0.16643650139  
AGTACGAC 0.0296336356325  
AGTACGAG 0.075726078991  
AGTACGAT 0.165064268666  
AGTACGCA -0.00946814583178  
AGTACGCC -0.220722127448  
AGTACGCG 0.0559609195973  
AGTACGGA 0.145811100357  
AGTACGGC -0.282713507166  
AGTACGGG -0.266395690851  
AGTACGTA 0.0916853492611  
AGTACGTC -0.140876551588  
AGTACGTG -0.0544636454008  
AGTACTAA 0.0137712312869  
AGTACTAC -0.0721743853583  
AGTACTAG -0.115850682813  
AGTACTAT -0.0700891469077  
AGTACTCA -0.112541584617  
AGTACTCC -0.0969145344433  
AGTACTCG -0.225649064483  
AGTACTGA 0.0669691730298  
AGTACTGC -0.13587752165  
AGTACTGG -0.0577746472705

AGTACTTA 0.0813637328789  
AGTACTTC -0.0275329737305  
AGTACTTG 0.104618876959  
AGTAGAAA 0.0646197161349  
AGTAGAAC 0.0387984204725  
AGTAGAAG -0.0147449248414  
AGTAGAAT 0.225492142508  
AGTAGACA 0.00492762932199  
AGTAGACC 0.0210971759398  
AGTAGACG -0.0107911988777  
AGTAGACT 0.0338148065421  
AGTAGAGA 0.0502058532362  
AGTAGAGC -0.127380588023  
AGTAGAGG -0.13317153639  
AGTAGATA 0.302906505697  
AGTAGATC 0.1434019693  
AGTAGATG 0.0512886579126  
AGTAGCAA 0.111459603074  
AGTAGCAC -0.182148002505  
AGTAGCAG -0.050929172854  
AGTAGCAT -0.05666054545  
AGTAGCCA -0.241552390139  
AGTAGCCC -0.247533513616  
AGTAGCCG -0.236646374303  
AGTAGCGA 0.071991854193  
AGTAGCGC -0.219856681042  
AGTAGCGG -0.0747813929632  
AGTAGCTA -0.0759631792762  
AGTAGCTC -0.161100983579  
AGTAGCTG -0.247322380988  
AGTAGGAA -0.0613580155008  
AGTAGGAC 0.196971858947  
AGTAGGAG -0.137588908172  
AGTAGGAT 0.0332191695828  
AGTAGGCA 0.0263822368911  
AGTAGGCC -0.366724375872  
AGTAGGCG 0.0241138271911  
AGTAGGGA -0.114326128496  
AGTAGGGC -0.24567576582  
AGTAGGGG -0.125823682655  
AGTAGGTA -0.117428815427  
AGTAGGTC -0.445740984158  
AGTAGGTG -0.259356033465  
AGTAGTAA 0.0954163529921  
AGTAGTAC -0.0456470996965  
AGTAGTAG -0.0318045318045  
AGTAGTAT 0.118706861131  
AGTAGTCA -0.14408959693  
AGTAGTCC -0.0629679266043  
AGTAGTCG -0.109339306332  
AGTAGTGA 0.0587512682204  
AGTAGTGC -0.199524778519  
AGTAGTGG -0.109250892316  
AGTAGTTA 0.157415564434

AGTAGTTC 0.0888527988438  
AGTAGTTG 0.125657617192  
AGTATAAA 0.143290673594  
AGTATAAC 0.20442691036  
AGTATAAG 0.00994649752195  
AGTATAAT 0.191137057349  
AGTATACA 0.138167092713  
AGTATACC -0.0719098195895  
AGTATACG 0.122001042468  
AGTATACT 0.0942381318581  
AGTATAGA 0.169718181354  
AGTATAGC -0.199858001602  
AGTATAGG -0.161912512865  
AGTATATA 0.238125442509  
AGTATATC 0.181955232399  
AGTATATG 0.164643839916  
AGTATCAA 0.16916636862  
AGTATCAC 0.0637030079853  
AGTATCAG 0.336610715399  
AGTATCAT 0.122008277191  
AGTATCCA 0.259724969526  
AGTATCCC 0.0273884513478  
AGTATCCG 0.298553316351  
AGTATCGA 0.247783625176  
AGTATCGC 0.159251257272  
AGTATCGG 0.23173448931  
AGTATCTA 0.322715277261  
AGTATCTC 0.187875447983  
AGTATCTG 0.367820989033  
AGTATGAA 0.0536031899668  
AGTATGAC 0.0990535990536  
AGTATGAG 0.0565576222455  
AGTATGAT 0.147146412852  
AGTATGCA 0.0850397436552  
AGTATGCC -0.140122059386  
AGTATGCG -0.0587556510556  
AGTATGGA 0.00176898661747  
AGTATGGC -0.185415374437  
AGTATGGG 0.103864578421  
AGTATGTA 0.120437508668  
AGTATGTC -0.142996542025  
AGTATGTG -0.0504769968541  
AGTATTAA -0.0669356851652  
AGTATTAC 0.264761355591  
AGTATTAG 0.091889228703  
AGTATTAT 0.165563527806  
AGTATTCA 0.0978219455048  
AGTATTCC 0.10307139095  
AGTATTCCG 0.100774328047  
AGTATTGA 0.081296759925  
AGTATTGC 0.110518017854  
AGTATTGG -0.0372590221075  
AGTATTTA 0.14374291647  
AGTATTTTC 0.239185273315

AGTATTTG 0.246017240498  
AGTCAAAA -0.0271913753713  
AGTCAAAC -0.0719907235059  
AGTCAAAG 0.00775293199536  
AGTCAAAT 0.0469997007365  
AGTCAACA 0.0407370641519  
AGTCAACC -0.200423162277  
AGTCAACG -0.227897203696  
AGTCAACT -0.132172783747  
AGTCAAGA 0.0857014038832  
AGTCAAGC -0.155456555529  
AGTCAAGG -0.206328969818  
AGTCAATA -0.0351579432855  
AGTCAATC -0.179976894933  
AGTCAATG -0.111822023106  
AGTCACAA -0.0662462475501  
AGTCACAC -0.145308583766  
AGTCACAG -0.119931291375  
AGTCACAT -0.258351112655  
AGTCACCA -0.177453485674  
AGTCACCC 0.0388976883718  
AGTCACCG -0.306391583753  
AGTCACGA 0.0701416978931  
AGTCACGC -0.252719933335  
AGTCACGG -0.144862189585  
AGTCACTA -0.14212341513  
AGTCACTC -0.226348883431  
AGTCACTG -0.0389468490575  
AGTCAGAA 0.00694767819528  
AGTCAGAC -0.0343883828732  
AGTCAGAG 0.00110278608577  
AGTCAGAT 0.17334552183  
AGTCAGCA -0.0883931242317  
AGTCAGCC -0.344824290985  
AGTCAGCG -0.15884279715  
AGTCAGGA 0.13798513739  
AGTCAGGC -0.279425991616  
AGTCAGGG -0.285313892347  
AGTCAGTA 0.0226217953491  
AGTCAGTC -0.219805677611  
AGTCAGTG -0.00368824040349  
AGTCATAA 0.0105466908207  
AGTCATAC 0.0946628905936  
AGTCATAG -0.161698351484  
AGTCATAT 0.074350926622  
AGTCATCA -0.145034050349  
AGTCATCC -0.304807896383  
AGTCATCG -0.286618699086  
AGTCATGA 0.137326031265  
AGTCATGC -0.310153127379  
AGTCATGG -0.2979407929  
AGTCATTA 0.0122946638098  
AGTCATTC 0.0655600504085  
AGTCATTG 0.100586812708

AGTCCAAA 0.035535414255  
AGTCCAAC -0.231283256571  
AGTCCAAG -0.0912863221973  
AGTCCAAT -0.155160433779  
AGTCCACA -0.362098295505  
AGTCCACC -0.205921758357  
AGTCCACG -0.350738559011  
AGTCCACT -0.147092392772  
AGTCCAGA -0.0216031765728  
AGTCCAGC -0.154940688963  
AGTCCAGG -0.347862696621  
AGTCCATA -0.0743815440785  
AGTCCATC -0.243282471157  
AGTCCATG -0.237622233801  
AGTCCCAA -0.161910515213  
AGTCCCAC -0.254141544467  
AGTCCCAG -0.0950255576785  
AGTCCCAT -0.191720457255  
AGTCCCCA -0.280788195311  
AGTCCCCC -0.0698550394624  
AGTCCCCG -0.340064651993  
AGTCCCCGA -0.0742866192855  
AGTCCCCGC -0.290382425992  
AGTCCCCGG -0.336756280428  
AGTCCCTA -0.120569140412  
AGTCCCTC -0.0770925861598  
AGTCCCTG -0.0879871490024  
AGTCCGAA 0.0653934585374  
AGTCCGAC 0.00747063932907  
AGTCCGAG -0.145376872369  
AGTCCGAT -0.0315562432939  
AGTCCGCA -0.0825040327584  
AGTCCGCC -0.213306625218  
AGTCCGCG -0.16533928793  
AGTCCGGA 0.0311489529426  
AGTCCGGC -0.386997249601  
AGTCCGGG -0.269330992121  
AGTCCGTA -0.0720751273122  
AGTCCGTC -0.358399202709  
AGTCCGTG -0.0930288738737  
AGTCCTAA -0.22188448591  
AGTCCTAC -0.0847625498322  
AGTCCTAG -0.165532123576  
AGTCCTAT -0.229863815643  
AGTCCTCA -0.239926943065  
AGTCCTCC -0.350983893818  
AGTCCTCG -0.357126689818  
AGTCCTGA 0.156671399777  
AGTCCTGC -0.300586878266  
AGTCCTGG -0.0738895871011  
AGTCCTTA -0.123329666664  
AGTCCTTC -0.1627358525  
AGTCCTTG -0.115420542333  
AGTCGAAA 0.152706777179

AGTCGAAC -0.129729276001  
AGTCGAAG -0.130895160973  
AGTCGAAT 0.0324651959203  
AGTCGACA 0.042983755105  
AGTCGACC -0.298396449924  
AGTCGACG -0.145664970204  
AGTCGACT -0.0615917040859  
AGTCGAGA 0.166220352201  
AGTCGAGC -0.337524313424  
AGTCGAGG -0.335557484807  
AGTCGATA 0.146156653504  
AGTCGATC -0.0636314533258  
AGTCGATG 0.0294991107251  
AGTCGCAA 0.186697717001  
AGTCGCAC -0.112707352913  
AGTCGCAG -0.119428506372  
AGTCGCAT -0.180399438668  
AGTCGCCA -0.276570727969  
AGTCGCCC -0.308056864691  
AGTCGCCG -0.322616198318  
AGTCGCGA 0.156538080781  
AGTCGCGC 0.0208075735568  
AGTCGCGG -0.0608490325029  
AGTCGCTA -0.0784522145293  
AGTCGCTC -0.130547043644  
AGTCGCTG -0.116456692109  
AGTCGGAA -0.0804675198615  
AGTCGGAC -0.0195250346765  
AGTCGGAG -0.250592205222  
AGTCGGAT 0.0140939430783  
AGTCGGCA 0.0674567899072  
AGTCGGCC -0.259432441148  
AGTCGGCG -0.213005976488  
AGTCGGGA 0.0579512857383  
AGTCGGGC -0.162340069379  
AGTCGGGG -0.0717856246778  
AGTCGGTA -0.0767624802061  
AGTCGGTC -0.190059205139  
AGTCGGTG -0.129099047123  
AGTCGTAA -0.0011592714942  
AGTCGTAC -0.184530749957  
AGTCGTAG -0.271087791257  
AGTCGTAT 0.118417624141  
AGTCGTCA -0.142082065428  
AGTCGTCC -0.290308894678  
AGTCGTCC -0.188346353502  
AGTCGTGA -0.0787240378173  
AGTCGTGC 0.010559622782  
AGTCGTGG -0.0956190740349  
AGTCGTTA 0.133330656993  
AGTCGTTC -0.0161142456735  
AGTCGTTG -0.0044108523171  
AGTCTAAA -0.0547172516869  
AGTCTAAC -0.0730099749386

AGTCTAAG 0.110367656183  
AGTCTAAT 0.000280198398754  
AGTCTACA 0.0208338503536  
AGTCTACC -0.207216233058  
AGTCTACG -0.282296551781  
AGTCTAGA 0.0890684072502  
AGTCTAGC -0.219327022282  
AGTCTAGG -0.304909475884  
AGTCTATA -0.139504457183  
AGTCTATC -0.0736441095293  
AGTCTATG -0.129216041427  
AGTCTCAA 0.121370334956  
AGTCTCAC -0.116618482765  
AGTCTCAG -0.217901004838  
AGTCTCAT -0.14898407105  
AGTCTCCA -0.0868671579696  
AGTCTCCC -0.43953231202  
AGTCTCCG -0.288917834843  
AGTCTCGA 0.0490930855529  
AGTCTCGC -0.00813646177135  
AGTCTCGG -0.260431336551  
AGTCTCTA -0.0987782988825  
AGTCTCTC -0.192858619692  
AGTCTCTG 0.0157711874922  
AGTCTGAA -0.0134962981346  
AGTCTGAC 0.0115239206148  
AGTCTGAG 0.0505000372236  
AGTCTGAT 0.0137871981336  
AGTCTGCA -0.0863745433123  
AGTCTGCC -0.45295255574  
AGTCTGCG -0.180848160004  
AGTCTGGA -0.0492410031983  
AGTCTGGC -0.223633612028  
AGTCTGGG -0.169972343236  
AGTCTGTA 0.0605234921863  
AGTCTGTC -0.197115377599  
AGTCTGTG -0.0452361246739  
AGTCTTAA -0.261126931604  
AGTCTTAC 0.0631637146789  
AGTCTTAG -0.110581083941  
AGTCTTAT -0.0695537080697  
AGTCTTCA 0.0558170259045  
AGTCTTCC -0.14951971707  
AGTCTTCG -0.301064108396  
AGTCTTGA -0.0232790522835  
AGTCTTGC -0.0727144661066  
AGTCTTGG -0.10872742112  
AGTCTTTA 0.149677225435  
AGTCTTTC -0.00271015963154  
AGTCTTTG -0.0476405626154  
AGTGAAAA 0.138337846616  
AGTGAAAC -0.124449884175  
AGTGAAAG -0.0968560811384  
AGTGAAAT 0.185262366518

AGTGAACA 0.0272572812345  
AGTGAACC -0.208881245321  
AGTGAACG -0.22118187059  
AGTGAACT -0.10016669513  
AGTGAAGA -0.0146502874633  
AGTGAAGC -0.386974362566  
AGTGAAGG -0.366968166172  
AGTGAATA 0.0493573724836  
AGTGAATC 0.155990014817  
AGTGAATG -0.0781240952594  
AGTGACAA 0.018569282846  
AGTGACAC -0.165458967169  
AGTGACAG -0.0382073426875  
AGTGACAT -0.0452464896823  
AGTGACCA 0.10880991184  
AGTGACCC -0.144204881014  
AGTGACCG -0.125511748505  
AGTGACGA 0.00451887914863  
AGTGACGC -0.245253788286  
AGTGACGG -0.308206472454  
AGTGACTA -0.158763095779  
AGTGACTC -0.148938956574  
AGTGACTG -0.119367117613  
AGTGAGAA 0.0321546341941  
AGTGAGAC -0.228880121965  
AGTGAGAG 0.102321117056  
AGTGAGAT 0.333545250834  
AGTGAGCA 0.215908746212  
AGTGAGCC -0.265930186914  
AGTGAGCG -0.17067736554  
AGTGAGGA -0.00112479288775  
AGTGAGGC -0.187403589217  
AGTGAGGG -0.188493421331  
AGTGAGTA -0.0126895031496  
AGTGAGTC -0.0926581158779  
AGTGAGTG 0.0221443928555  
AGTGATAA -0.207455572598  
AGTGATAC 0.0961746870838  
AGTGATAG 0.0193565104414  
AGTGATAT 0.313008600887  
AGTGATCA 0.0564379806804  
AGTGATCC 0.023548589225  
AGTGATCG -0.0228040424095  
AGTGATGA 0.0431960886506  
AGTGATGC 0.139587788314  
AGTGATGG -0.131922014271  
AGTGATTA 0.221731640913  
AGTGATTC 0.335831332161  
AGTGATTG 0.258647620855  
AGTGCAAA 0.188217046342  
AGTGCAAC -0.0858696161726  
AGTGCAAG 0.208269161989  
AGTGCAAT 0.304188277043  
AGTGCACA -0.0407804498714



AGTGCACC -0.326169312648  
AGTGCACG -0.329564117195  
AGTGCACT 0.149740778409  
AGTGCAGA 0.081583454056  
AGTGCAGC -0.178452974699  
AGTGCAGG -0.183792333457  
AGTGCATA -0.00970343715101  
AGTGCATC -0.00281526681897  
AGTGCATG -0.0641288671592  
AGTGCCAA -0.313554054705  
AGTGCCAC -0.290232950458  
AGTGCCAG -0.284997009215  
AGTGCCAT -0.103440361281  
AGTGCCCA -0.169632937739  
AGTGCCCC -0.218316333902  
AGTGCCCG -0.332977835098  
AGTGCCGA -0.102055517361  
AGTGCCGC -0.165032314928  
AGTGCCGG -0.167438272731  
AGTGCCTA -0.0897596025267  
AGTGCCTC -0.312109460059  
AGTGCCTG -0.236827204149  
AGTGCGAA 0.0588867104019  
AGTGCGAC 0.023333250606  
AGTGCGAG -0.0684006919557  
AGTGCGAT 0.306923935972  
AGTGCGCA 0.0880867092988  
AGTGCGCC -0.157812265083  
AGTGCGCG -0.0327357795085  
AGTGCGGA -0.082668166566  
AGTGCGGC -0.259416127841  
AGTGCGGG -0.132051942518  
AGTGCGTA 0.0200922607534  
AGTGCGTC -0.200303017145  
AGTGCGTG -0.0466314509377  
AGTGCTAA -0.14856375067  
AGTGCTAC -0.0619730954797  
AGTGCTAG -0.177981783926  
AGTGCTAT 0.00172210778271  
AGTGCTCA -0.00761478375999  
AGTGCTCC -0.116296367889  
AGTGCTCG -0.266820087835  
AGTGCTGA -0.0776658200901  
AGTGCTGC -0.137842879391  
AGTGCTGG -0.159828213744  
AGTGCTTA 0.0445845844604  
AGTGCTTC -0.191176835417  
AGTGCTTG -0.110880876161  
AGTGGAAG -0.0207383692232  
AGTGGAAC -0.0113225477302  
AGTGGAAG -0.0303459117202  
AGTGGAAT 0.1706155191  
AGTGGACA 0.0905464693343  
AGTGGACC -0.0788961406005

AGTGGACG -0.0801866343202  
AGTGGAGA 0.138487356379  
AGTGGAGC -0.211356462529  
AGTGGAGG -0.340804041707  
AGTGGATA 0.203303206018  
AGTGGATC 0.205089669569  
AGTGGATG -0.111198294928  
AGTGGCAA 0.0377691741328  
AGTGGCAC -0.101910330644  
AGTGGCAG -0.128580770505  
AGTGGCAT -0.0772315556989  
AGTGGCCA -0.0979888568246  
AGTGGCCC -0.339255568282  
AGTGGCCG -0.149200362807  
AGTGGCGA 0.0790048393101  
AGTGGCGC -0.371342042634  
AGTGGCGG -0.119174383561  
AGTGGCTA -0.0566184682087  
AGTGGCTC -0.223544514177  
AGTGGCTG -0.154645425931  
AGTGGGAA -0.159714427914  
AGTGGGAC -0.0533168973686  
AGTGGGAG -0.0858362767562  
AGTGGGAT 0.167855183007  
AGTGGGCA -0.0826584212823  
AGTGGGCC -0.205632810072  
AGTGGGCG -0.297418936982  
AGTGGGGA -0.197754870578  
AGTGGGGC -0.228868661547  
AGTGGGGG -0.211211507004  
AGTGGGTA -0.0159752275877  
AGTGGGTC -0.279912568667  
AGTGGGTG -0.230102346841  
AGTGGTAA -0.222275819491  
AGTGGTAC -0.184878848952  
AGTGGTAG -0.00139395593941  
AGTGGTAT 0.0673736723233  
AGTGGTCA -0.0169797897071  
AGTGGTCC -0.264537912047  
AGTGGTCG -0.232430839846  
AGTGGTGA 0.110720913751  
AGTGGTGC -0.19832737132  
AGTGGTGG -0.0817817411601  
AGTGGTTA 0.0126318401787  
AGTGGTTC -0.0630120478605  
AGTGGTTG -0.158886286185  
AGTGTAAG 0.0989007539981  
AGTGTAAC 0.0644487462669  
AGTGTAAG -0.00459985866684  
AGTGTAAT 0.370648087998  
AGTGTAACA 0.00470850875669  
AGTGTAACC -0.287185858889  
AGTGTAACG -0.222403258359  
AGTGTAGA 0.0564975330784

AGTGTAGC -0.00585987391309  
AGTGTAGG -0.170010095588  
AGTGTATA 0.106758273425  
AGTGTATC 0.0883506200594  
AGTGTATG 0.0363780355175  
AGTGTCAA -0.12630799646  
AGTGTCCAC -0.180568996082  
AGTGTCCAG -0.0280015766078  
AGTGTCCAT -0.187276808489  
AGTGTCCA -0.166434065252  
AGTGTCCC -0.164505841932  
AGTGTCCG -0.317257735994  
AGTGTCCA -0.265029039558  
AGTGTCCG -0.074560786682  
AGTGTCCG -0.35362079182  
AGTGTCTA -0.0646970918149  
AGTGTCTC 0.0195482366955  
AGTGTCTG -0.0201256730268  
AGTGTGAA -0.0729582785401  
AGTGTGAC -0.0625526448326  
AGTGTGAG -0.0638181568825  
AGTGTGAT 0.246788110424  
AGTGTGCA 0.0771198195441  
AGTGTGCC -0.246811190056  
AGTGTGCG -0.207064519626  
AGTGTGGA 0.203659582447  
AGTGTGGC -0.196465674745  
AGTGTGGG 0.0665525572433  
AGTGTGTA 0.0671649611044  
AGTGTGTC -0.0152039091433  
AGTGTGTG -0.275353044788  
AGTGTTAA -0.0750028262374  
AGTGTTAC 0.0485182151849  
AGTGTTAG -0.180432190429  
AGTGTTAT -0.0590738888929  
AGTGTTCA 0.0890776114392  
AGTGTTCC -0.103093362919  
AGTGTTCCG -0.168696501675  
AGTGTTGA 0.0976169006472  
AGTGTTGC -0.0898653474411  
AGTGTTGG -0.00065473018839  
AGTGTTTA 0.101535732794  
AGTGTTTC 0.140910883335  
AGTGTTTG 0.0617351444859  
AGTTAAAA 0.0709730252872  
AGTTAAAC -0.106426290319  
AGTTAAAG -0.00874754944537  
AGTTAAAT 0.0605440150895  
AGTTAACA -0.016038334927  
AGTTAACC -0.063100290373  
AGTTAACG -0.037529264802  
AGTTAACT 0.0138802748766  
AGTTAAGA 0.00703269271476  
AGTTAAGC -0.0960576056117

AGTTAAGG -0.315114583805  
AGTTAATA 0.0942802306439  
AGTTAATC -0.194959320006  
AGTTAATG -0.0117493777509  
AGTTACAA 0.192306888439  
AGTTACAC -0.175921128865  
AGTTACAG -0.152928767983  
AGTTACAT 0.124119179872  
AGTTACCA -0.113208249572  
AGTTACCC -0.12331477483  
AGTTACCG -0.0433282482865  
AGTTACGA 0.0423412393109  
AGTTACGC 0.0518273094031  
AGTTACGG -0.10418545267  
AGTTACTA 0.0430932169369  
AGTTACTC -0.122964844796  
AGTTACTG 0.00927205973592  
AGTTAGAA 0.013778241051  
AGTTAGAC -0.140986867936  
AGTTAGAG 0.125098928129  
AGTTAGAT 0.307650927352  
AGTTAGCA 0.234467249619  
AGTTAGCC -0.103843216402  
AGTTAGCG -0.0653365254775  
AGTTAGGA 0.138217485173  
AGTTAGGC -0.0545138326305  
AGTTAGGG -0.339207514516  
AGTTAGTA 0.173632220334  
AGTTAGTC -0.112667764183  
AGTTAGTG 0.149076297599  
AGTTATAA 0.0151735757796  
AGTTATAC 0.0763771596242  
AGTTATAG -0.209585186331  
AGTTATAT 0.121984920038  
AGTTATCA 0.0995270176565  
AGTTATCC -0.0239812266885  
AGTTATCG -0.122072776303  
AGTTATGA 0.105380053106  
AGTTATGC 0.0973245973246  
AGTTATGG -0.0605278716524  
AGTTATTA 0.0713086574747  
AGTTATTC 0.119434404183  
AGTTATTG -0.0578797544579  
AGTTCAAA 0.133637219623  
AGTTCAAC -0.099777209773  
AGTTCAAG 0.156959990293  
AGTTCAAT 0.0275330426846  
AGTTCACA -0.00655135344131  
AGTTCACC -0.0830845112749  
AGTTCACG -0.0480392643518  
AGTTCAGA -0.00488213251899  
AGTTCAGC -0.233067608282  
AGTTCAGG -0.220061005422  
AGTTCATA -0.117712001564

AGTTCATC -0.215689436987  
AGTTCATG -0.16100327111  
AGTTCCAA -0.0947215949976  
AGTTCCAC -0.237833910931  
AGTTCCAG 0.029253771678  
AGTTCCAT -0.0733421895871  
AGTTCCCA -0.181677469638  
AGTTCCCC -0.160794289176  
AGTTCCCG -0.218413491076  
AGTTCCGA -0.106836883201  
AGTTCCGC -0.244059654651  
AGTTCCGG -0.327853715143  
AGTTCCTA -0.0554569819093  
AGTTCCTC -0.135450181826  
AGTTCCTG -0.0737224444876  
AGTTCCGAA -0.0204047022229  
AGTTCCGAC -0.120567287887  
AGTTCCGAG 0.102686072568  
AGTTCCGAT 0.0646884383453  
AGTTCCGCA -0.0702970007956  
AGTTCCGCC -0.106030410634  
AGTTCCGCG -0.190746294796  
AGTTCCGGA 0.0838014322863  
AGTTCCGGC -0.208384677942  
AGTTCCGGG -0.221335188004  
AGTTCCGTA 0.12101219677  
AGTTCCGTC -0.111089051578  
AGTTCCGTG -0.148334697996  
AGTTCTAA 0.0364313190222  
AGTTCTAC -0.0797449690883  
AGTTCTAG -0.127965136638  
AGTTCTAT 0.00422983438319  
AGTTCTCA -0.067738102131  
AGTTCTCC -0.176574949972  
AGTTCTCG -0.43124619374  
AGTTCTGA 0.0218674043634  
AGTTCTGC -0.0447155144125  
AGTTCTGG -0.0446990307493  
AGTTCTTA -0.0238045882207  
AGTTCTTC -0.0153288614118  
AGTTCTTG -0.0866827693266  
AGTTGAAA 0.123491729249  
AGTTGAAC -0.136302604406  
AGTTGAAG -0.094037798756  
AGTTGAAT -0.201293127986  
AGTTGACA 0.0154383480654  
AGTTGACC -0.147829299019  
AGTTGACG 0.0499552608954  
AGTTGAGA 0.0321795873083  
AGTTGAGC -0.11501479236  
AGTTGAGG -0.145715309653  
AGTTGATA 0.112885612886  
AGTTGATC -0.191137422287  
AGTTGATG -0.316592375738

AGTTGCAA 0.032336744458  
AGTTGCAC -0.204158474229  
AGTTGCAG 0.0325077143259  
AGTTGCAT -0.0759669496288  
AGTTGCCA -0.110830758092  
AGTTGCCC -0.224279069511  
AGTTGCCG -0.191619819926  
AGTTGCGA 0.0033215033215  
AGTTGCGC -0.0704651845105  
AGTTGCGG -0.0712692422794  
AGTTGCTA -0.160987754161  
AGTTGCTC -0.231607603137  
AGTTGCTG -0.00866017532684  
AGTTGGAA 0.102155874883  
AGTTGGAC -0.319203787402  
AGTTGGAG 0.0152105156382  
AGTTGGAT 0.213120834333  
AGTTGGCA -0.127752313494  
AGTTGGCC -0.153721120679  
AGTTGGCG -0.342240351602  
AGTTGGGA 0.107833405108  
AGTTGGGC -0.241228831987  
AGTTGGGG -0.0332605332605  
AGTTGGTA 0.183212776363  
AGTTGGTC 0.00335686079867  
AGTTGGTG -0.338499039136  
AGTTGTAA 0.023937432027  
AGTTGTAC -0.196688201217  
AGTTGTAG -0.0164470851003  
AGTTGTAT 0.0520068903601  
AGTTGTCA -0.00518123285216  
AGTTGTCC -0.224204770864  
AGTTGTCTG -0.193269026602  
AGTTGTGA 0.0374051737688  
AGTTGTGC -0.0626979741812  
AGTTGTGG -0.120866865724  
AGTTGTGA 0.168136456015  
AGTTGTTC 0.188418445994  
AGTTGTTG 0.0690208114451  
AGTTTAAA 0.122303008769  
AGTTTAAAC 0.0572081527937  
AGTTTAAAG 0.0526738860072  
AGTTTAAAT 0.0712061924183  
AGTTTACA -0.0293805407343  
AGTTTACC -0.11916308402  
AGTTTACG -0.216822002244  
AGTTTAGA 0.173135945863  
AGTTTAGC -0.138562042847  
AGTTTAGG 0.0421712534432  
AGTTTATA 0.23210784922  
AGTTTATC -0.171767478856  
AGTTTATG -0.0331902150084  
AGTTTCAA 0.0362061691937  
AGTTTCAC -0.0760428603753

AGTTTCAG 0.0319138996956  
AGTTTCAT -0.0065782035479  
AGTTTCCA 0.0658218042687  
AGTTTCCC -0.113513572695  
AGTTTCCG -0.0271939474649  
AGTTTCGA -0.0835263756362  
AGTTTCGC -0.000930682748865  
AGTTTCGG -0.18824536489  
AGTTTCTA 0.0415029354423  
AGTTTCTC -0.146778565517  
AGTTTCTG -0.0485806880141  
AGTTTGAA -0.178343897914  
AGTTTGAC -0.0503621319088  
AGTTTGAG 0.0656538080781  
AGTTTGAT 0.119092922123  
AGTTTGCA -0.00544395364419  
AGTTTGCC -0.149333209279  
AGTTTGCG -0.219866339131  
AGTTTGGA 0.126195046824  
AGTTTGGC -0.153618938207  
AGTTTGGG 0.0900063877397  
AGTTTGTA 0.0735404826314  
AGTTTGTC 0.0448297843713  
AGTTTGTG -0.173711205531  
AGTTTTAA -0.221931103319  
AGTTTTAC -0.0539837358019  
AGTTTTAG -0.112946279613  
AGTTTTAT 0.142318286721  
AGTTTTCA -0.00728138606926  
AGTTTTCC 0.00525732343914  
AGTTTTCG -0.191245440334  
AGTTTTGA 0.122038015977  
AGTTTTGC 0.117173422026  
AGTTTTGG -0.135384626614  
AGTTTTTA 0.176172039808  
AGTTTTTC 0.229059947592  
AGTTTTTG 0.0689904780814  
ATAAAAAA 0.250227367284  
ATAAAAAC 0.189291475369  
ATAAAAAG 0.0885058612331  
ATAAAAAT 0.271418144128  
ATAAAACA 0.0738217556399  
ATAAAACC -0.047030501576  
ATAAAACG 0.0684795223462  
ATAAAAGA 0.167179550813  
ATAAAAGC -0.062582927908  
ATAAAAGG -0.0884005702106  
ATAAAATA 0.217919020949  
ATAAAATC 0.405420572087  
ATAAAATG -0.0676475696852  
ATAAACAA 0.0791800179558  
ATAAACAC -0.0616305010244  
ATAAACAG -0.0716377534559  
ATAAACAT 0.190128917785

ATAAACCA 0.148048582878  
ATAAACCC -0.178602446711  
ATAAACCG -0.144780719741  
ATAAACGA 0.027561997259  
ATAAACGC -0.0198264000904  
ATAAACGG -0.0493748312081  
ATAAACTA 0.050633277906  
ATAAACTC 0.159622052072  
ATAAACTG -0.0245658882023  
ATAAAGAA 0.188217142763  
ATAAAGAC 0.208209586997  
ATAAAGAG 0.193930845446  
ATAAAGAT 0.222826507449  
ATAAAGCA 0.0892283468041  
ATAAAGCC -0.06078158913  
ATAAAGCG -0.184970596263  
ATAAAGGA 0.158599478269  
ATAAAGGC -0.110624170762  
ATAAAGGG 0.0680695833437  
ATAAAGTA 0.0517165254354  
ATAAAGTC -0.130377778329  
ATAAAGTG -0.0498170346655  
ATAAATAA 0.142495419808  
ATAAATAC 0.130648683525  
ATAAATAG 0.0947212834755  
ATAAATAT 0.248621563031  
ATAAATCA 0.309808544338  
ATAAATCC 0.257435121071  
ATAAATCG 0.109816427998  
ATAAATGA 0.149450012044  
ATAAATGC -0.0404909041273  
ATAAATGG -0.0687734186953  
ATAAATTA 0.314690233812  
ATAAATTC 0.301954701722  
ATAAATTG 0.178620176201  
ATAACAAA 0.113831813902  
ATAACAAC 0.141902256199  
ATAACAAG 0.0366481025963  
ATAACAAT 0.0998890535244  
ATAACACA 0.176844888966  
ATAACACC -0.0114836901382  
ATAACACG 0.197559818772  
ATAACAGA 0.272797634054  
ATAACAGC -0.059375281668  
ATAACAGG -0.0862326170698  
ATAACATA 0.0862484763107  
ATAACATC 0.0395546082932  
ATAACATG -0.205831569021  
ATAACCAA -0.0785840937356  
ATAACCAC -0.0108524502464  
ATAACCAG -0.172417794632  
ATAACCAT -0.0721616933738  
ATAACCCA -0.00233352554324  
ATAACCCC -0.151617395265



ATAACCCG -0.0704517419327  
ATAACCGA 0.0958575655545  
ATAACCGC 0.0476945760312  
ATAACCGG -0.255519991619  
ATAACCTA -0.0304708797532  
ATAACCTC 0.0837683413441  
ATAACCTG -0.0845983724772  
ATAACGAA 0.180713561017  
ATAACGAC 0.0733198763502  
ATAACGAG 0.0983035376975  
ATAACGAT 0.228563608096  
ATAACGCA 0.227269969694  
ATAACGCC -0.126716422049  
ATAACGCG -0.0348544136423  
ATAACGGA 0.0974730480354  
ATAACGGC 0.000574382957977  
ATAACGGG -0.0970433517215  
ATAACGTA 0.167521516006  
ATAACGTC 0.000539404246622  
ATAACGTG 0.0115289446217  
ATAACTAA -0.158920748735  
ATAACTAC 0.0562790033998  
ATAACTAG 0.0540610963595  
ATAACTAT 0.0653890805406  
ATAACTCA 0.0523514083633  
ATAACTCC -0.147082178364  
ATAACTCG 0.0848548272791  
ATAACTGA 0.0742298772602  
ATAACTGC 0.0406005707904  
ATAACTGG -0.0798442369875  
ATAACTTA 0.081512813588  
ATAACTTC 0.184368955424  
ATAACTTG 0.125388473873  
ATAAGAAA 0.0774340707868  
ATAAGAAC 0.151219316365  
ATAAGAAG 0.163655390928  
ATAAGAAT 0.2863404451  
ATAAGACA 0.213182923002  
ATAAGACC -0.331611993055  
ATAAGACG -0.105884542674  
ATAAGAGA 0.17754255633  
ATAAGAGC -0.117301567606  
ATAAGAGG -0.275181465356  
ATAAGATA 0.314237644431  
ATAAGATC 0.329615860405  
ATAAGATG 0.0828252494919  
ATAAGCAA 0.117678444998  
ATAAGCAC -0.0612665416086  
ATAAGCAG -0.0844302870897  
ATAAGCAT 0.0945169083889  
ATAAGCCA 0.133495616884  
ATAAGCCC -0.200317984744  
ATAAGCCG -0.138556819924  
ATAAGCGA 0.137048043279

ATAAGCGC -0.0198627354418  
ATAAGCGG 0.0309993188781  
ATAAGCTA 0.0489521552473  
ATAAGCTC 0.075476302749  
ATAAGCTG -0.04126578369  
ATAAGGAA 0.0282086494208  
ATAAGGAC -0.0184164881135  
ATAAGGAG -0.00182689576629  
ATAAGGAT 0.167732823369  
ATAAGGCA 0.0715422290023  
ATAAGGCC -0.105025437399  
ATAAGGCG -0.148869040235  
ATAAGGGA -0.0968609544719  
ATAAGGGC -0.210296780897  
ATAAGGGG -0.220041001911  
ATAAGGTA 0.0733290511887  
ATAAGGTC -0.0607468449596  
ATAAGGTG 0.00951147055174  
ATAAGTAA 0.133035239096  
ATAAGTAC 0.0795778842097  
ATAAGTAG -0.0151500111671  
ATAAGTAT 0.09575154478  
ATAAGTCA 0.0110413640577  
ATAAGTCC 0.00248972650234  
ATAAGTCG -0.104233355666  
ATAAGTGA -0.0236531297137  
ATAAGTGC 0.0859909496273  
ATAAGTGG -0.0397601458208  
ATAAGTTA 0.103176178934  
ATAAGTTC 0.154491957522  
ATAAGTTG -0.0289927957782  
ATAATAAA 0.170853922907  
ATAATAAC 0.0836572921761  
ATAATAAG 0.0547922308271  
ATAATAAT 0.141820884245  
ATAATACA 0.237335131275  
ATAATACC 0.071006267976  
ATAATACG 0.12799438557  
ATAATAGA 0.257441807844  
ATAATAGC -0.00765895637322  
ATAATAGG -0.00709622974013  
ATAATATA 0.195390611884  
ATAATATC 0.326243220951  
ATAATATG 0.0691510404882  
ATAATCAA 0.210916242232  
ATAATCAC 0.187992233747  
ATAATCAG 0.241956015562  
ATAATCAT 0.211114797741  
ATAATCCA 0.378735484796  
ATAATCCC 0.177828952651  
ATAATCCG 0.361886236068  
ATAATCGA 0.217574323635  
ATAATCGC 0.147532694742  
ATAATCGG 0.0831901861327

ATAATCTA 0.312164781862  
ATAATCTC 0.391727918367  
ATAATCTG 0.364010015525  
ATAATGAA 0.156985613454  
ATAATGAC 0.108612303645  
ATAATGAG 0.167332832128  
ATAATGAT 0.129141538232  
ATAATGCA 0.150909863031  
ATAATGCC 0.061451258421  
ATAATGCG -0.0225418255721  
ATAATGGA 0.14942628579  
ATAATGGC 0.0204513769771  
ATAATGGG 0.0780617942673  
ATAATGTA 0.252971685237  
ATAATGTC 0.192670632065  
ATAATGTG 0.0482396997549  
ATAATTAA -0.00600643781523  
ATAATTAC 0.194348298942  
ATAATTAG 0.0375721699525  
ATAATTAT 0.105484028346  
ATAATTCA 0.176613252371  
ATAATTCC 0.0883514368363  
ATAATTCG -0.208957740065  
ATAATTGA -0.00944577855959  
ATAATTGC 0.129102932133  
ATAATTGG 0.189203008265  
ATAATTTA 0.144219977553  
ATAATTTT 0.248972112608  
ATAATTTG 0.130051539142  
ATACAAA 0.259161365222  
ATACAAAC 0.105459453944  
ATACAAAG -0.0849652927308  
ATACAAAT 0.268048874842  
ATACAACA 0.124075385211  
ATACAACC -0.117536847729  
ATACAACG -0.0119809377249  
ATACAAGA 0.123257884864  
ATACAAGC -0.0439216756758  
ATACAAGG -0.173547862293  
ATACAATA 0.172763370145  
ATACAATC 0.280773817844  
ATACAATG -0.014601870032  
ATACACAA 0.169107975738  
ATACACAC -0.0667016879138  
ATACACAG -0.0134661284789  
ATACACAT 0.170068671468  
ATACACCA 0.12056013372  
ATACACCC -0.0263334960305  
ATACACCG 0.0670849913274  
ATACACGA 0.229829002556  
ATACACGC -0.0591556389276  
ATACACGG 0.0223124550215  
ATACACTA 0.00906705213788  
ATACACTC 0.0342379363956

ATACACTG -0.0204820332401  
ATACAGAA 0.181224498734  
ATACAGAC -0.0378347023352  
ATACAGAG 0.159856125633  
ATACAGAT 0.207183054386  
ATACAGCA 0.0408769651194  
ATACAGCC -0.0381078435428  
ATACAGCG -0.0345752234106  
ATACAGGA 0.159885781098  
ATACAGGC 0.0890916197236  
ATACAGGG 0.0187694581634  
ATACAGTA 0.158033765684  
ATACAGTC -0.113878715245  
ATACAGTG -0.0465511298617  
ATACATAA 0.186809777888  
ATACATAC 0.191165886878  
ATACATAG 0.1105176943  
ATACATAT 0.222009007102  
ATACATCA 0.130168682438  
ATACATCC 0.102621840398  
ATACATCG -0.10270450604  
ATACATGA 0.126568717478  
ATACATGC 0.15373896922  
ATACATGG -0.0260301623938  
ATACATTA 0.187151376247  
ATACATTC 0.156165193463  
ATACATTG 0.142863294964  
ATACCAA 0.155244186912  
ATACCAAC -0.0736457514718  
ATACCAAG -0.211792716855  
ATACCAAT 0.0513171573778  
ATACCACA 0.223025043247  
ATACCACC 0.0287782019372  
ATACCACG 0.16634575568  
ATACCAGA 0.0316611377217  
ATACCAGC -0.113928162157  
ATACCAGG -0.0472276243628  
ATACCATA 0.178262284323  
ATACCATC 0.0248804770698  
ATACCATG -0.141158840057  
ATACCCAA 0.0378787325825  
ATACCCAC 0.235891914776  
ATACCCAG 0.161680964711  
ATACCCAT 0.157770718377  
ATACCCCA 0.0238673605687  
ATACCCCG -0.0138479145287  
ATACCCCG 0.0422903148106  
ATACCCGA 0.0988826291857  
ATACCCGC 0.0722925775348  
ATACCCGG -0.210093312529  
ATACCCTA 0.103746680235  
ATACCCTC 0.0917019472809  
ATACCCTG -0.0470088651749  
ATACCGAA 0.285750676992

ATACCGAC 0.143587636784  
ATACCGAG 0.104033785852  
ATACCGAT 0.259264508595  
ATACCGCA 0.28266169354  
ATACCGCC 0.0135931329971  
ATACCGCG 0.143164018306  
ATACCGGA 0.154332017968  
ATACCGGC 0.0461014467578  
ATACCGGG -0.111254085474  
ATACCGTA 0.170747882869  
ATACCGTC -0.0306307161157  
ATACCGTG -0.208892207222  
ATACCTAA 0.1513758938  
ATACCTAC -0.0952008734708  
ATACCTAG 0.0590811880032  
ATACCTAT 0.0468858346168  
ATACCTCA 0.101416843841  
ATACCTCC -0.161473879644  
ATACCTCG 0.00614499838698  
ATACCTGA 0.0581256187317  
ATACCTGC 0.123298229359  
ATACCTGG -0.0972911311476  
ATACCTTA 0.139330525609  
ATACCTTC 0.0697880735539  
ATACCTTG 0.0909578622366  
ATACGAAA 0.315274710276  
ATACGAAC 0.179461830977  
ATACGAAG 0.0970460818946  
ATACGAAT 0.391124029084  
ATACGACA 0.143298321935  
ATACGACC 0.0340218827325  
ATACGACG 0.0718166755473  
ATACGAGA 0.240081604052  
ATACGAGC 0.0828646088042  
ATACGAGG -0.025067767492  
ATACGATA 0.275677904863  
ATACGATC 0.278898272301  
ATACGATG 0.269117602451  
ATACGCAA 0.236490441815  
ATACGCAC 0.170317700621  
ATACGCAG 0.162302285351  
ATACGCAT 0.241891783392  
ATACGCCA 0.164220694524  
ATACGCCC -0.0562391710202  
ATACGCCG 0.176118267027  
ATACGCGA 0.176620219995  
ATACGCGC 0.260831514638  
ATACGCGG 0.108186699096  
ATACGCTA 0.279167597349  
ATACGCTC 0.221842587389  
ATACGCTG 0.190947145493  
ATACGGAA 0.166521171069  
ATACGGAC 0.0637552152704  
ATACGGAG 0.0983666196839

ATACGGAT 0.286807588155  
ATACGGCA 0.187323687324  
ATACGGCC -0.0233650353268  
ATACGGCG -0.027623317097  
ATACGGGA 0.0916381393108  
ATACGGGC -0.0753825450795  
ATACGGGG -0.153584392346  
ATACGGTA 0.228890608235  
ATACGGTC 0.0931385931386  
ATACGGTG 0.155534550338  
ATACGTAA 0.192179003379  
ATACGTAC 0.149096735108  
ATACGTAG 0.0123756414093  
ATACGTAT 0.183279171111  
ATACGTCA 0.143400509478  
ATACGTCC 0.0220664403308  
ATACGTCCG -0.0386568177339  
ATACGTGA 0.133346845468  
ATACGTGC 0.321621336576  
ATACGTGG 0.0675510220965  
ATACGTTA 0.283262601444  
ATACGTTC 0.128821659125  
ATACGTTG 0.167033424609  
ATACTAAA 0.102492299462  
ATACTAAC 0.0960947173068  
ATACTAAG -6.78817252177E-5  
ATACTAAT 0.104353189346  
ATACTACA 0.23288715713  
ATACTACC 0.000375904177281  
ATACTACG 0.0452829500084  
ATACTAGA 0.214934709459  
ATACTAGC 0.0588797325606  
ATACTAGG -0.0948658058583  
ATACTATA 0.120278680885  
ATACTATC 0.087022283992  
ATACTATG -0.0596461391356  
ATACTCAA 0.244639168485  
ATACTCAC 0.201244498296  
ATACTCAG 0.132256909928  
ATACTCAT 0.29381181434  
ATACTCCA 0.23542477172  
ATACTCCC 0.039364831427  
ATACTCCG 0.196394969453  
ATACTCGA 0.115909140676  
ATACTCGC 0.165406453285  
ATACTCGG 0.248729445699  
ATACTCTA 0.247863566045  
ATACTCTC 0.158236330694  
ATACTCTG 0.0541820252111  
ATACTGAA 0.216402352766  
ATACTGAC 0.111077129698  
ATACTGAG 0.152815349785  
ATACTGAT 0.175434844492  
ATACTGCA 0.147056147056

ATACTGCC -0.0106340737064  
ATACTGCG 0.0388626526426  
ATACTGGA 0.0927738808639  
ATACTGGC -0.110784386709  
ATACTGGG -0.0166593922479  
ATACTGTA 0.339399137245  
ATACTGTC 0.217924425013  
ATACTGTG 0.193845360512  
ATACTTAA 0.205422508996  
ATACTTAC 0.0909187424339  
ATACTTAG -0.151074395365  
ATACTTCA 0.0808033400728  
ATACTTCC 0.0291198002963  
ATACTTCG -0.0603526930067  
ATACTTGA -0.0212705818766  
ATACTTGC 0.299344799345  
ATACTTGG 0.0567337941505  
ATACTTTA 0.118985376561  
ATACTTTC 0.240680131092  
ATACTTTG 0.00616555841843  
ATAGAAAA 0.2196119793  
ATAGAAAC -0.0235826952694  
ATAGAAAG -0.0987518521492  
ATAGAAAT 0.234293522172  
ATAGAACA -0.00358897250425  
ATAGAACC -0.0257571621208  
ATAGAACG -0.00806315957831  
ATAGAAGA 0.125216966052  
ATAGAAGC -0.14069974881  
ATAGAAGG -0.299375442716  
ATAGAATA 0.135205453387  
ATAGAATC 0.374138601411  
ATAGAATG -0.0267364420398  
ATAGACAA 0.155073246571  
ATAGACAC 0.0134914528854  
ATAGACAG 0.11876477028  
ATAGACAT 0.142121705364  
ATAGACCA -0.219302086298  
ATAGACCC -0.247237288902  
ATAGACCG -0.213321606096  
ATAGACGA 0.0828307646489  
ATAGACGC -0.0390913642674  
ATAGACGG 0.0253155040401  
ATAGACTA 0.00102995557541  
ATAGACTC -0.176202332013  
ATAGACTG -0.243899174281  
ATAGAGAA 0.183501821128  
ATAGAGAC 0.0530579622344  
ATAGAGAG 0.151928183239  
ATAGAGAT 0.25874396911  
ATAGAGCA -0.0146894626148  
ATAGAGCC -0.203426082007  
ATAGAGCG -0.0895459541035  
ATAGAGGA 0.153245549368

ATAGAGGC -0.078725969433  
ATAGAGGG -0.0929638543588  
ATAGAGTA 0.224073752389  
ATAGAGTC -0.21658603151  
ATAGAGTG -0.00263716852916  
ATAGATAA 0.19589148377  
ATAGATAC 0.268374435041  
ATAGATAG 0.101047119051  
ATAGATAT 0.404816662392  
ATAGATCA -0.0127643760067  
ATAGATCC 0.20918852737  
ATAGATCG 0.250193719891  
ATAGATGA 0.0940297493629  
ATAGATGC 0.187157215535  
ATAGATGG 0.0140815746876  
ATAGATTA 0.335454698072  
ATAGATTC 0.450498796436  
ATAGATTG 0.308523900936  
ATAGCAAA 0.145826611402  
ATAGCAAC -0.00265468639373  
ATAGCAAG -0.00735458331326  
ATAGCAAT 0.331597848222  
ATAGCACA 0.0174092183971  
ATAGCACC -0.113648273275  
ATAGCACG 0.0949006858098  
ATAGCAGA -0.0141814412823  
ATAGCAGC -0.0585863201026  
ATAGCAGG -0.050596702262  
ATAGCATA 0.00883484303263  
ATAGCATC 0.00877875120299  
ATAGCATG -0.164335943853  
ATAGCCAA 0.036795748917  
ATAGCCAC -0.0987447502599  
ATAGCCAG -0.208605840172  
ATAGCCAT 0.00263809275664  
ATAGCCCA 0.0176718757983  
ATAGCCCC -0.133564108291  
ATAGCCCG -0.0688366817556  
ATAGCCGA 0.0470948847137  
ATAGCCGC -0.0819648849952  
ATAGCCGG -0.196100746731  
ATAGCCTA -0.121708159494  
ATAGCCTC 0.0257874954845  
ATAGCCTG -0.152472766074  
ATAGCGAA 0.238293389277  
ATAGCGAC 0.155299518989  
ATAGCGAG 0.0207812967599  
ATAGCGAT 0.239254405921  
ATAGCGCA 0.0358451476038  
ATAGCGCC -0.167550020049  
ATAGCGCG 0.15191419166  
ATAGCGGA 0.0633503107002  
ATAGCGGC -0.010646558204  
ATAGCGGG -0.257680634464



ATAGCGTA 0.27489835989  
ATAGCGTC -0.0956493623084  
ATAGCGTG -0.0378393173872  
ATAGCTAA 0.108580833996  
ATAGCTAC -0.0848516928709  
ATAGCTAG -0.192828296244  
ATAGCTAT -0.0630131719297  
ATAGCTCA -0.0926311986918  
ATAGCTCC -0.282238925686  
ATAGCTCG -0.0129376728977  
ATAGCTGA 0.0438330892876  
ATAGCTGC 0.0275578608912  
ATAGCTGG -0.172348343878  
ATAGCTTA 0.0884065884066  
ATAGCTTC -0.0619393498181  
ATAGCTTG 0.13274380853  
ATAGGAAA 0.186948656646  
ATAGGAAC -0.023813347153  
ATAGGAAG 0.059406513952  
ATAGGAAT 0.239681612811  
ATAGGACA -0.13726390509  
ATAGGACC -0.257928823369  
ATAGGACG -0.136639617507  
ATAGGAGA 0.0641757459939  
ATAGGAGC -0.0804223265184  
ATAGGAGG -0.109951988836  
ATAGGATA 0.152874754567  
ATAGGATC 0.241372226221  
ATAGGATG -0.114729057798  
ATAGGCAA 0.034059919207  
ATAGGCAC -0.111717800164  
ATAGGCAG 0.0122745186662  
ATAGGCAT -0.210513678686  
ATAGGCCA -0.211270751135  
ATAGGCCC -0.253777614343  
ATAGGCCG -0.00676846492413  
ATAGGCCG 0.0761656973778  
ATAGGCCG 0.0628325327004  
ATAGGCCG -0.172062176566  
ATAGGCTA 0.0041570496116  
ATAGGCTC -0.0424335445486  
ATAGGCTG -0.0277067771794  
ATAGGGAA 0.0858776815106  
ATAGGGAC -0.0414730769848  
ATAGGGAG -0.00192176034123  
ATAGGGAT 0.188640394736  
ATAGGGCA -0.0944540592081  
ATAGGGCC -0.107555433104  
ATAGGGCG -0.0165632024325  
ATAGGGGA -0.18811179751  
ATAGGGGC -0.0878791328934  
ATAGGGGG -0.26373971993  
ATAGGGTA 0.0810777866178  
ATAGGGTC -0.320687089173

ATAGGGTG -0.0489310453056  
ATAGGTAA 0.208739042072  
ATAGGTAC -0.182718683748  
ATAGGTAG -0.139490397514  
ATAGGTCA -0.267950239519  
ATAGGTCC -0.191682513182  
ATAGGTCCG -0.237612584671  
ATAGGTGA 0.0557306617913  
ATAGGTGC 0.181583614957  
ATAGGTGG -0.172374614155  
ATAGGTTA -0.0577543159004  
ATAGGTTC -0.14364797768  
ATAGGTTG -0.0658153471092  
ATAGTAAA 0.127108895426  
ATAGTAAC 0.00731723458996  
ATAGTAAG 0.115781070327  
ATAGTAAT 0.354963038631  
ATAGTACA 0.0690196565039  
ATAGTACC -0.264352137819  
ATAGTACG 0.11842972449  
ATAGTAGA 0.278767748465  
ATAGTAGC -0.0471302052846  
ATAGTAGG -0.021130605256  
ATAGTATA 0.0211212993523  
ATAGTATC 0.118599315569  
ATAGTATG -0.120141164792  
ATAGTCAA -0.037422140606  
ATAGTCAC -0.196786941424  
ATAGTCAG -0.109838903428  
ATAGTCAT -0.16109869513  
ATAGTCCA 0.00494295948841  
ATAGTCCC -0.0746172361597  
ATAGTCCG -0.0836894896162  
ATAGTCGA 0.0740340891856  
ATAGTCGC -0.269497058612  
ATAGTCGG -0.0586354650057  
ATAGTCTA -0.0456814814274  
ATAGTCTC 0.0498434340854  
ATAGTCTG -0.00566544505938  
ATAGTGAA 0.113922462407  
ATAGTGAC -0.120492822426  
ATAGTGAG 0.0449085449085  
ATAGTGAT -0.0335299227024  
ATAGTGCA 0.0286691650328  
ATAGTGCC 0.0877337392489  
ATAGTGCG -0.0573542185208  
ATAGTGGA 0.0850147668329  
ATAGTGGC 0.0238095238095  
ATAGTGGG -0.228122596571  
ATAGTGTA 0.137257578301  
ATAGTGTC -0.134374399925  
ATAGTGTG -0.0159347327142  
ATAGTTAA 0.0818952869645  
ATAGTTAC -0.112687067233

ATAGTTAG 0.206975759655  
ATAGTTCA 0.129593781109  
ATAGTTCC -0.111779886525  
ATAGTTCG -0.0342627533704  
ATAGTTGA 0.195597687173  
ATAGTTGC 0.178950095983  
ATAGTTGG -0.113037279704  
ATAGTTTA 0.245208868639  
ATAGTTTC 0.16040144828  
ATAGTTTG 0.0325435628466  
ATATAAAA 0.223706780144  
ATATAAAC 0.26174536324  
ATATAAAG 0.110390004329  
ATATAAAT 0.259029001453  
ATATAACA 0.261931945099  
ATATAACC 0.0702948127191  
ATATAACG 0.147741405317  
ATATAAGA 0.262565783231  
ATATAAGC 0.103306994248  
ATATAAGG -0.0109493952687  
ATATAATA 0.156245777458  
ATATAATC 0.30099121917  
ATATAATG 0.207773889592  
ATATACAA 0.238140040729  
ATATACAC 0.114380220441  
ATATACAG 0.202240096932  
ATATACAT 0.339761644787  
ATATACCA 0.109025002964  
ATATACCC 0.0811155508125  
ATATACCG 0.0253896325286  
ATATACGA 0.243823127961  
ATATACGC 0.0921782734685  
ATATACGG 0.0662301163858  
ATATACTA 0.120784946315  
ATATACTC 0.268010919469  
ATATACTG 0.294325671701  
ATATAGAA 0.22298416823  
ATATAGAC 0.0853171098443  
ATATAGAG 0.233172747211  
ATATAGAT 0.318317740775  
ATATAGCA 0.178874466753  
ATATAGCC 0.0605088939658  
ATATAGCG 0.076375273345  
ATATAGGA 0.243626051984  
ATATAGGC 0.0554754275454  
ATATAGGG -0.0177050328565  
ATATAGTA 0.146866127019  
ATATAGTC -0.0305197696401  
ATATAGTG 0.0897081654657  
ATATATAA 0.135351605049  
ATATATAC 0.228023473939  
ATATATAG 0.0841521718503  
ATATATAT 0.211925887337  
ATATATCA 0.249377750852

ATATATCC 0.310269848106  
ATATATCG 0.235699887215  
ATATATGA 0.339624748716  
ATATATGC 0.248122303891  
ATATATGG 0.164016552101  
ATATATTA 0.250831733612  
ATATATTC 0.317107654577  
ATATATTG 0.346216506208  
ATATCAAA 0.233160157403  
ATATCAAC 0.22597092055  
ATATCAAG 0.297884717853  
ATATCAAT 0.285820748451  
ATATCACA 0.391295811041  
ATATCACC 0.261891367952  
ATATCACG 0.338527232467  
ATATCAGA 0.302138226381  
ATATCAGC 0.299156885128  
ATATCAGG 0.310027517646  
ATATCATA 0.294474573549  
ATATCATC 0.322500186137  
ATATCATG 0.37804057501  
ATATCCAA 0.402020477778  
ATATCCAC 0.392826711009  
ATATCCAG 0.391812588046  
ATATCCAT 0.426182638336  
ATATCCCA 0.370113346457  
ATATCCCC 0.367423897727  
ATATCCCG 0.365398567915  
ATATCCGA 0.401220780009  
ATATCCGC 0.413563701442  
ATATCCGG 0.426200156201  
ATATCCTA 0.38472953147  
ATATCCTC 0.406419567455  
ATATCCTG 0.403228297168  
ATATCGAA 0.176491918916  
ATATCGAC 0.326558542514  
ATATCGAG 0.346816513483  
ATATCGAT 0.324546907732  
ATATCGCA 0.343645298191  
ATATCGCC 0.321055214995  
ATATCGCG 0.420965042177  
ATATCGGA 0.379146363995  
ATATCGGC 0.365310978592  
ATATCGGG 0.331316164649  
ATATCGTA 0.329726356357  
ATATCGTC 0.337045904104  
ATATCGTG 0.35904657915  
ATATCTAA 0.380624426079  
ATATCTAC 0.407879389502  
ATATCTAG 0.377760346114  
ATATCTCA 0.390673042188  
ATATCTCC 0.359331547484  
ATATCTCG 0.442918124736  
ATATCTGA 0.393330802975

ATATCTGC 0.447288745502  
ATATCTGG 0.407204725387  
ATATCTTA 0.415676610553  
ATATCTTC 0.428551140672  
ATATCTTG 0.44787073575  
ATATGAAA 0.240478675649  
ATATGAAC 0.151819863941  
ATATGAAG 0.242265497836  
ATATGAAT 0.298392735925  
ATATGACA 0.129727816179  
ATATGACC -0.0941395941396  
ATATGACG 0.102525492143  
ATATGAGA 0.297344583695  
ATATGAGC 0.0399393884242  
ATATGAGG -0.0839448263691  
ATATGATA 0.218867470055  
ATATGATC 0.104395028637  
ATATGATG 0.197929144422  
ATATGCAA 0.281276738047  
ATATGCAC 0.315697466479  
ATATGCAG 0.153782763881  
ATATGCAT 0.276899372852  
ATATGCCA 0.239268193814  
ATATGCCC 0.121684196696  
ATATGCCG 0.210000510938  
ATATGCGA 0.271133425383  
ATATGCGC 0.166795617614  
ATATGCGG 0.131219754312  
ATATGCTA 0.187028626423  
ATATGCTC 0.220205053538  
ATATGCTG 0.310002730274  
ATATGGAA 0.23027148423  
ATATGGAC 0.143875280239  
ATATGGAG 0.150219338263  
ATATGGAT 0.268670759034  
ATATGGCA 0.201299971533  
ATATGGCC -0.0868117371229  
ATATGGCG 0.116598176682  
ATATGGGA 0.192105328469  
ATATGGGC 0.102426117578  
ATATGGGG 0.0953577658883  
ATATGGTA 0.253074020277  
ATATGGTC 0.0390063603077  
ATATGGTG 0.226046874886  
ATATGTAA 0.131915662219  
ATATGTAC 0.152550674073  
ATATGTAG 0.138768244829  
ATATGTCA 0.1177996178  
ATATGTCC -0.107794478935  
ATATGTCCG -0.0108209309285  
ATATGTGA 0.214271950249  
ATATGTGC 0.279911388802  
ATATGTGG 0.197883987942  
ATATGTTA 0.12564323409

ATATGTTTC 0.0983292800953  
ATATGTTG 0.174379393152  
ATATTA AAA 0.213697168243  
ATATTAAC 0.151353619994  
ATATTAAG 0.315538377547  
ATATTAAT 0.307352807353  
ATATTACA 0.241223316981  
ATATTACC 0.103605727474  
ATATTACG 0.306392560747  
ATATTAGA 0.222043188436  
ATATTAGC 0.184278446457  
ATATTAGG 0.0493631526317  
ATATTATA 0.276670583856  
ATATTATC 0.219670372182  
ATATTATG 0.110420337693  
ATATTCAA 0.135599220455  
ATATTCAC 0.114540159995  
ATATTCAG 0.27248046945  
ATATTCAT -0.000686846273439  
ATATTCCA 0.31800836478  
ATATTCCC 0.409301256177  
ATATTCCG 0.364975219521  
ATATTCGA 0.27617424436  
ATATTCGC 0.304710206929  
ATATTCGG 0.238528353394  
ATATTCTA 0.24538367773  
ATATTCTC 0.377352784806  
ATATTCTG 0.313750389508  
ATATTGAA 0.207083786486  
ATATTGAC 0.0833657348809  
ATATTGAG 0.209729012759  
ATATTGAT 0.191369055005  
ATATTGCA 0.303406712498  
ATATTGCC 0.190494902616  
ATATTGCG 0.348407636286  
ATATTGGA 0.207577206339  
ATATTGGC 0.0933054266388  
ATATTGGG 0.0275023174675  
ATATTGTA 0.234993947115  
ATATTGTC 0.249181080477  
ATATTGTG 0.168983032619  
ATATTTAA 0.196932183967  
ATATTTAC 0.252570752571  
ATATTTAG 0.317972242215  
ATATTTCA 0.297000857607  
ATATTTCC 0.375291269231  
ATATTTCG 0.350602668784  
ATATTTGA 0.290418517691  
ATATTTGC 0.385582067546  
ATATTTGG 0.170325973356  
ATATTTTA 0.328244038018  
ATATTTTC 0.374072419527  
ATATTTTG 0.328111793172  
ATCAAAAA 0.232650005377

ATCAAAAC 0.208369526551  
ATCAAAAG 0.00639912994606  
ATCAAAAT 0.275064779603  
ATCAAACA -0.00997278270006  
ATCAAACC 0.155957898732  
ATCAAACG 0.0847922922302  
ATCAAAGA 0.152801763465  
ATCAAAGC 0.152340744969  
ATCAAAGG -0.0878054362903  
ATCAAATA 0.232420457946  
ATCAAATC 0.353492259294  
ATCAAATG -0.0439807887419  
ATCAACAA 0.239091844704  
ATCAACAC 0.128946780592  
ATCAACAG 0.228916885032  
ATCAACAT -0.00611446464676  
ATCAACCA 0.0037159770224  
ATCAACCC 0.0609672780888  
ATCAACCG -0.176157487487  
ATCAACGA 0.265832444103  
ATCAACGC 0.0140882126635  
ATCAACGG 0.101721162752  
ATCAACTA 0.109369137902  
ATCAACTC 0.0775141532717  
ATCAACTG -0.0745507194764  
ATCAAGAA 0.118417624141  
ATCAAGAC 0.227327716703  
ATCAAGAG 0.235233856446  
ATCAAGAT 0.285455547732  
ATCAAGCA 0.044900272173  
ATCAAGCC -0.145437444087  
ATCAAGCG 0.070829835843  
ATCAAGGA 0.304702086816  
ATCAAGGC -0.0325520510212  
ATCAAGGG -0.112842293033  
ATCAAGTA 0.106463212524  
ATCAAGTC -0.0285414802672  
ATCAAGTG 0.0613437128589  
ATCAATAA 0.214794684492  
ATCAATAC 0.159598694919  
ATCAATAG 0.0656328693532  
ATCAATCA 0.168704517189  
ATCAATCC 0.115787252998  
ATCAATCG 0.0420765117735  
ATCAATGA 0.130081023401  
ATCAATGC -0.0589970135425  
ATCAATGG -0.026325854063  
ATCAATTA 0.205597687642  
ATCAATTC 0.119903466759  
ATCAATTG 0.142215217973  
ATCACAAA 0.169645434726  
ATCACAAAC 0.209685189375  
ATCACAAAG 0.0699743801231  
ATCACAAAT 0.215409624501

ATCACACA 0.287994606176  
ATCACACC 0.280080728159  
ATCACACG 0.0962896245603  
ATCACAGA 0.316593797216  
ATCACAGC 0.160424954198  
ATCACAGG -0.0112052116313  
ATCACATA 0.2341985212  
ATCACATC 0.196135121129  
ATCACATG 0.147010647011  
ATCACCAA 0.163236571462  
ATCACCC 0.155677612899  
ATCACCCAG 0.0248050236249  
ATCACCCAT 0.0370986199005  
ATCACCCA 0.0805419744814  
ATCACCCC -0.0554011311587  
ATCACCCG -0.0458020739417  
ATCACCGA 0.0880783092476  
ATCACCGC 0.179544558332  
ATCACCGG 0.0988274776154  
ATCACCTA 0.0410684437567  
ATCACCTC 0.0258674652614  
ATCACCTG -0.114296860569  
ATCACGAA 0.190180538665  
ATCACGAC 0.205306846664  
ATCACGAG 0.19919782041  
ATCACGAT 0.312342795413  
ATCACGCA 0.0913315766808  
ATCACGCC 0.0993045332051  
ATCACGCG 0.193575204109  
ATCACGGA 0.275608762046  
ATCACGGC 0.0908673532696  
ATCACGGG 0.021009990707  
ATCACGTA 0.249161697189  
ATCACGTC 0.0571521935158  
ATCACGTG 0.185255503437  
ATCACTAA 0.0658547623045  
ATCACTAC 0.0922065316005  
ATCACTAG 0.161414713546  
ATCACTCA 0.162316883572  
ATCACTCC -0.0695146754728  
ATCACTCG 0.0978861776749  
ATCACTGA 0.214596030744  
ATCACTGC 0.033089056444  
ATCACTGG 0.0530544318423  
ATCACTTA 0.146682495167  
ATCACTTC 0.191865419138  
ATCACTTG 0.127415458056  
ATCAGAAA 0.195594986971  
ATCAGAAC 0.219507386174  
ATCAGAAG 0.271409385196  
ATCAGAAT 0.220191265646  
ATCAGACA 0.0922512645708  
ATCAGACC 0.0528834619744  
ATCAGACG -0.10499885421



ATCAGAGA 0.248743679207  
ATCAGAGC -0.0757831434929  
ATCAGAGG -0.0723708505263  
ATCAGATA 0.290474299471  
ATCAGATC 0.364289103158  
ATCAGATG -0.0071793556642  
ATCAGCAA 0.096844778663  
ATCAGCAC 0.0901972949497  
ATCAGCAG 0.0998219017102  
ATCAGCAT 0.184482821544  
ATCAGCCA 0.236160402827  
ATCAGCCC 0.09595260271  
ATCAGCCG -0.230364305504  
ATCAGCGA 0.263978854888  
ATCAGCGC 0.0502171485296  
ATCAGCGG 0.0047904060495  
ATCAGCTA 0.300701527974  
ATCAGCTC 0.0434663313451  
ATCAGCTG 0.0637730560645  
ATCAGGAA 0.242562332714  
ATCAGGAC 0.262657974779  
ATCAGGAG 0.0750075144015  
ATCAGGAT 0.311012114042  
ATCAGGCA 0.182316445625  
ATCAGGCC 0.00793951981924  
ATCAGGCG 0.126406020345  
ATCAGGGA 0.176734086115  
ATCAGGGC -0.0457928334092  
ATCAGGGG 0.131475750755  
ATCAGGTA 0.253900279556  
ATCAGGTC 0.128082628083  
ATCAGGTG 0.0135442288927  
ATCAGTAA 0.149607672825  
ATCAGTAC 0.217844566329  
ATCAGTAG 0.0612446442779  
ATCAGTCA 0.0872649509013  
ATCAGTCC -0.11691494964  
ATCAGTCG -0.0923471681047  
ATCAGTGA 0.283656935172  
ATCAGTGC 0.14329540229  
ATCAGTGG 0.174092825608  
ATCAGTTA 0.0752311685326  
ATCAGTTC 0.217339929461  
ATCAGTTG 0.0100296961726  
ATCATAAA 0.23860167283  
ATCATAAC 0.188217046342  
ATCATAAG 0.252427358488  
ATCATAAT 0.102073147528  
ATCATACA 0.167108019532  
ATCATACC 0.161496463581  
ATCATACG 0.000361305956804  
ATCATAGA 0.214777048678  
ATCATAGC 0.204845341209  
ATCATAGG 0.0871623249126

ATCATATA 0.162960481142  
ATCATATC 0.350055838193  
ATCATATG -0.0455559367313  
ATCATCAA 0.136050365172  
ATCATCAC 0.119719174584  
ATCATCAG 0.0697466478836  
ATCATCAT -0.0785484827177  
ATCATCCA 0.171402815997  
ATCATCCC 0.0806077239185  
ATCATCCG 0.0933473371978  
ATCATCGA 0.232892672287  
ATCATCGC 0.0739155133095  
ATCATCGG 0.106732699284  
ATCATCTA 0.164762093872  
ATCATCTC 0.222223601011  
ATCATCTG 0.184398151865  
ATCATGAA 0.226119865988  
ATCATGAC 0.177650101893  
ATCATGAG 0.233509485194  
ATCATGAT 0.208035426332  
ATCATGCA 0.0659013077897  
ATCATGCC 0.0618138799957  
ATCATGCG -0.0184256892573  
ATCATGGA 0.221105274914  
ATCATGGC -0.0768866375189  
ATCATGGG -0.11428153956  
ATCATGTA 0.141376914104  
ATCATGTC 0.266078115078  
ATCATGTG 0.0751976234097  
ATCATTAA 0.044167645964  
ATCATTAC 0.117733435915  
ATCATTAG 0.0498858475817  
ATCATTCA 0.0980376951138  
ATCATTCC -0.258864104409  
ATCATTCCG 0.308249454392  
ATCATTGA 0.206228330766  
ATCATTGC 0.220715205564  
ATCATTGG 0.00225615497471  
ATCATTTA 0.0647659875425  
ATCATTTTC 0.0850838772117  
ATCATTTG 0.0549075246045  
ATCCAAAA 0.282691782692  
ATCCAAAC 0.334845865149  
ATCCAAAG 0.197237182086  
ATCCAAAT 0.259672415932  
ATCCAACA 0.293631096661  
ATCCAACC 0.314771223559  
ATCCAACG 0.0645116261756  
ATCCAAGA 0.205302803588  
ATCCAAGC 0.221827989168  
ATCCAAGG -0.107193580924  
ATCCAATA 0.309169142282  
ATCCAATC 0.300916619098  
ATCCAATG 0.188228724918

ATCCACAA 0.286833864952  
ATCCACAC 0.268068343826  
ATCCACAG 0.208037187357  
ATCCACAT 0.192205280176  
ATCCACCA 0.202619650665  
ATCCACCC 0.287470347365  
ATCCACCG -0.0270862681839  
ATCCACGA 0.331198967563  
ATCCACGC 0.273674500947  
ATCCACGG 0.243266682661  
ATCCACTA 0.315046385846  
ATCCACTC 0.157280129166  
ATCCACTG 0.226106271561  
ATCCAGAA 0.338127621553  
ATCCAGAC 0.257195351189  
ATCCAGAG 0.193008182303  
ATCCAGAT 0.389445919749  
ATCCAGCA 0.277064735809  
ATCCAGCC 0.183063228518  
ATCCAGCG 0.0851477704868  
ATCCAGGA 0.298255512653  
ATCCAGGC 0.114563184748  
ATCCAGGG 0.142241410772  
ATCCAGTA 0.386037532025  
ATCCAGTC 0.0926008653281  
ATCCAGTG 0.134212844629  
ATCCATAA 0.246106988531  
ATCCATAC 0.141000562031  
ATCCATAG 0.190489387459  
ATCCATCA 0.303963416859  
ATCCATCC 0.198301497048  
ATCCATCG 0.135006532704  
ATCCATGA 0.297615797616  
ATCCATGC 0.160311088078  
ATCCATGG 0.218539476115  
ATCCATTA 0.379912118713  
ATCCATTC 0.297951869667  
ATCCATTG 0.294552127885  
ATCCCAA 0.268344101677  
ATCCCAAC 0.16224075315  
ATCCCAAG 0.260180434005  
ATCCCAAT 0.145447099993  
ATCCCACA 0.286949483919  
ATCCCACC 0.212006772613  
ATCCCACG -0.0836525072038  
ATCCCAGA 0.271953773142  
ATCCCAGC 0.0598548936885  
ATCCCAGG -0.0057699466435  
ATCCCATA 0.303916864523  
ATCCCATC 0.153482683786  
ATCCCATG 0.14600964601  
ATCCCCAA 0.310801672581  
ATCCCCAC 0.221825069524  
ATCCCCAG 0.119054316024

ATCCCAT 0.271322286474  
ATCCCCA 0.12028695362  
ATCCCCCC 0.053425108449  
ATCCCCCG -0.0234396327088  
ATCCCCGA 0.270616701824  
ATCCCCGC 0.173571643269  
ATCCCCGG 0.266054757925  
ATCCCCTA 0.278552657341  
ATCCCCTC 0.176918023693  
ATCCCCTG 0.0136734530674  
ATCCCGAA 0.102486646489  
ATCCCGAC 0.18289901493  
ATCCCGAG 0.191438873601  
ATCCCGAT 0.250099604326  
ATCCCGCA 0.295258067985  
ATCCCGCC 0.115818297636  
ATCCCGCG 0.0182645635497  
ATCCCGGA 0.321571790399  
ATCCCGGC -0.030488763162  
ATCCCGGG 0.0880031824121  
ATCCCGTA 0.343752843753  
ATCCCGTC 0.20222659255  
ATCCCGTG 0.00898832717015  
ATCCCTAA 0.0882396735838  
ATCCCTAC 0.105871404276  
ATCCCTAG 0.0160981876309  
ATCCCTCA 0.305887462318  
ATCCCTCC 0.139015612202  
ATCCCTCG 0.157740385013  
ATCCCTGA 0.0343868382444  
ATCCCTGC 0.187715263473  
ATCCCTGG 0.0904877995372  
ATCCCTTA 0.26865324117  
ATCCCTTC 0.0517569911509  
ATCCCTTG 0.146690767903  
ATCCGAAA 0.293744157381  
ATCCGAAC 0.313601480268  
ATCCGAAG 0.181116471902  
ATCCGAAT 0.359551011066  
ATCCGACA 0.121674015613  
ATCCGACC 0.18731265701  
ATCCGACG 0.156025050546  
ATCCGAGA 0.321933826267  
ATCCGAGC 0.163589209044  
ATCCGAGG -0.0261935187712  
ATCCGATA 0.394632924936  
ATCCGATC 0.250716171432  
ATCCGATG 0.161563615395  
ATCCGCAA 0.303142663439  
ATCCGCAC 0.307126685915  
ATCCGCAG 0.226718393028  
ATCCGCAT 0.242796873061  
ATCCGCCA 0.282970298122  
ATCCGCCC 0.20436000739

ATCCGCCG 0.170823266644  
ATCCGCGA 0.341419530959  
ATCCGCGC 0.240244376608  
ATCCGCGG 0.226858535944  
ATCCGCTA 0.375340905644  
ATCCGCTC 0.289265849872  
ATCCGCTG 0.276626789194  
ATCCGGAA 0.312385388143  
ATCCGGAC 0.307379400451  
ATCCGGAG 0.266834302898  
ATCCGGAT 0.437811294959  
ATCCGGCA 0.288819122152  
ATCCGGCC 0.262227792531  
ATCCGGCG 0.201584133325  
ATCCGGGA 0.263286935323  
ATCCGGGC 0.116415313385  
ATCCGGGG 0.287884303036  
ATCCGGTA 0.349190788585  
ATCCGGTC 0.0947931402477  
ATCCGGTG 0.225596818622  
ATCCGTAA 0.27008413372  
ATCCGTAC 0.26888922562  
ATCCGTAG 0.117342685927  
ATCCGTCA 0.236324022102  
ATCCGTCC 0.00586123313396  
ATCCGTCCG 0.150792862992  
ATCCGTGA 0.318546005113  
ATCCGTGC 0.111360671967  
ATCCGTGG 0.0897432883079  
ATCCGTTA 0.338207353359  
ATCCGTTC 0.176205604229  
ATCCGTTG 0.221484569969  
ATCCTAAA 0.265482507682  
ATCCTAAC 0.303083144165  
ATCCTAAG 0.134146543237  
ATCCTAAT 0.243521146815  
ATCCTACA 0.310992810993  
ATCCTACC 0.28687309229  
ATCCTACG 0.0341415881404  
ATCCTAGA 0.321747367202  
ATCCTAGC 0.224644754948  
ATCCTAGG 0.0116136143004  
ATCCTATA 0.384361656314  
ATCCTATC 0.184226926651  
ATCCTATG -0.00269277542005  
ATCCTCAA 0.337717422246  
ATCCTCAC 0.21446464676  
ATCCTCAG 0.184654351321  
ATCCTCAT 0.155122880521  
ATCCTCCA 0.347617935374  
ATCCTCCC 0.35122312395  
ATCCTCCG 0.277441369897  
ATCCTCGA 0.283987281997  
ATCCTCGC 0.142727746482

ATCCTCGG 0.154426179733  
ATCCTCTA 0.354728006243  
ATCCTCTC 0.132544292901  
ATCCTCTG 0.305504988942  
ATCCTGAA 0.178003054097  
ATCCTGAC 0.362633983846  
ATCCTGAG 0.23637949534  
ATCCTGCA 0.350528214165  
ATCCTGCC 0.256895834398  
ATCCTGCG 0.174424647635  
ATCCTGGA 0.3200790322  
ATCCTGGC 0.159485932213  
ATCCTGGG 0.117858905738  
ATCCTGTA 0.292597242396  
ATCCTGTC 0.350125909652  
ATCCTGTG 0.175819069758  
ATCCTTAA 0.275464169404  
ATCCTTAC 0.240478770782  
ATCCTTAG 0.0251166339926  
ATCCTTCA 0.145747903331  
ATCCTTCC 0.16484091393  
ATCCTTCG 0.113821595148  
ATCCTTGA 0.205945125289  
ATCCTTGC 0.0802717317869  
ATCCTTGG 0.128942992579  
ATCCTTTA 0.266215251064  
ATCCTTTC 0.183330713634  
ATCCTTTG 0.251484266636  
ATCGAAAA 0.175563308833  
ATCGAAAC 0.228218576703  
ATCGAAAG 0.0403867068604  
ATCGAAAT 0.3583269226  
ATCGAACA 0.0750350901866  
ATCGAACCC -0.0225754180565  
ATCGAACG 0.0588315588316  
ATCGAAGA 0.270460500865  
ATCGAAGC 0.0429246667027  
ATCGAAGG -0.141964803092  
ATCGAATA 0.225226454895  
ATCGAATC 0.349606213003  
ATCGAATG -0.0369088096361  
ATCGACAA 0.137345334315  
ATCGACAC -0.0242205063427  
ATCGACAG 0.177589541835  
ATCGACAT 0.0145082681388  
ATCGACCA 0.0156316743063  
ATCGACCC -0.16858979131  
ATCGACCG -0.0758892017964  
ATCGACGA 0.0670499510554  
ATCGACGC 0.117341241283  
ATCGACGG -0.0876572045868  
ATCGACTA 0.148626588021  
ATCGACTC 0.00692466588323  
ATCGACTG 0.0439194762158

ATCGAGAA 0.249161697189  
ATCGAGAC 0.00142405640752  
ATCGAGAG 0.152433666758  
ATCGAGAT 0.320027298672  
ATCGAGCA 0.0167674561614  
ATCGAGCC 0.0280424516251  
ATCGAGCG -0.107682102194  
ATCGAGGA 0.217596384263  
ATCGAGGC 0.0153186426575  
ATCGAGGG -0.00352370713585  
ATCGAGTA 0.0769102435769  
ATCGAGTC -0.126203142217  
ATCGAGTG -0.135695236927  
ATCGATAA 0.177831872295  
ATCGATAC 0.198704407933  
ATCGATAG 0.0984438296972  
ATCGATCA 0.181411355956  
ATCGATCC 0.078756669562  
ATCGATCG 0.0661588261189  
ATCGATGA 0.189379064692  
ATCGATGC -0.0204350355866  
ATCGATGG 0.0604137792298  
ATCGATTA 0.274587259436  
ATCGATTC 0.35885973839  
ATCGATTG 0.275826806712  
ATCGCAAA 0.181954681955  
ATCGCAAC 0.259866572265  
ATCGCAAG 0.112058339331  
ATCGCAAT 0.37720502872  
ATCGCACA 0.221344020647  
ATCGCACC 0.336149573367  
ATCGCACG 0.184923687802  
ATCGCAGA 0.222020685678  
ATCGCAGC 0.0298101051691  
ATCGCAGG 0.132693606872  
ATCGCATA 0.310672931885  
ATCGCATC 0.136139166687  
ATCGCATG 0.239725078998  
ATCGCCAA 0.199930374943  
ATCGCCAC 0.263850426633  
ATCGCCAG 0.168869500698  
ATCGCCAT 0.0587454289322  
ATCGCCCA 0.16159391518  
ATCGCCCC 0.15887926494  
ATCGCCCG 0.177962999727  
ATCGCCGA 0.165946938674  
ATCGCCGC 0.10138099532  
ATCGCCGG 0.0408509302716  
ATCGCCTA 0.30201017496  
ATCGCCTC 0.185382071925  
ATCGCCTG 0.162007401298  
ATCGCGAA 0.305207411268  
ATCGCGAC 0.37545598928  
ATCGCGAG 0.335224046189

ATCGCGAT 0.424596284077  
ATCGCGCA 0.331823559096  
ATCGCGCC 0.265809507821  
ATCGCGCG 0.391474551455  
ATCGCGGA 0.343264746027  
ATCGCGGC 0.145019326505  
ATCGCGGG 0.21832714257  
ATCGCGTA 0.387389327241  
ATCGCGTC 0.312816400725  
ATCGCGTG 0.316301149634  
ATCGCTAA 0.15568776832  
ATCGCTAC 0.108263911294  
ATCGCTAG 0.122259366583  
ATCGCTCA 0.118387918513  
ATCGCTCC 0.136617333587  
ATCGCTCG 0.206653100727  
ATCGCTGA 0.108680546939  
ATCGCTGC 0.089562272359  
ATCGCTGG 0.0737728370912  
ATCGCTTA 0.249301840106  
ATCGCTTC 0.18898374959  
ATCGCTTG 0.196175514357  
ATCGGAAA 0.301677010277  
ATCGGAAC 0.103617439034  
ATCGGAAG 0.0789844018014  
ATCGGAAT 0.320117807639  
ATCGGACA -0.0558960995988  
ATCGGACC -0.0171215228864  
ATCGGACG -0.0811703365668  
ATCGGAGA 0.232837967052  
ATCGGAGC -0.0594244382123  
ATCGGAGG -0.141947287836  
ATCGGATA 0.317542681547  
ATCGGATC 0.244794381158  
ATCGGATG 0.173364816829  
ATCGGCAA 0.212869894688  
ATCGGCAC -0.0149960219849  
ATCGGCAG 0.0724838640992  
ATCGGCAT 0.100924616076  
ATCGGCCA 0.0427355730386  
ATCGGCCC 0.125183390145  
ATCGGCCG -0.0199260527557  
ATCGGCGA 0.261334337092  
ATCGGCGC 0.00591638470426  
ATCGGCGG 0.00916120747413  
ATCGGCTA 0.059034340959  
ATCGGCTC 0.0387546258111  
ATCGGCTG -0.00295198780047  
ATCGGGAA 0.255885637541  
ATCGGGAC 0.0153244819457  
ATCGGGAG 0.118183543426  
ATCGGGCA 0.0111406622087  
ATCGGGCC -0.283742093514  
ATCGGGCG 0.0497756709878



ATCGGGGA 0.230306635621  
ATCGGGGC 0.109129790948  
ATCGGGGG 0.0238799672367  
ATCGGGTA 0.222535207384  
ATCGGGTC -0.0482040539258  
ATCGGGTG -0.12810131538  
ATCGGTAA 0.168649591615  
ATCGGTAC 0.0657846908462  
ATCGGTAG 0.0511893900134  
ATCGGTCA -0.0545119674875  
ATCGGTCC -0.157935957607  
ATCGGTCCG 0.00334753415781  
ATCGGTGA 0.256952544831  
ATCGGTGC 0.0150162818848  
ATCGGTGG 0.130979361984  
ATCGGTTA 0.212282530464  
ATCGGTTC 0.142404910841  
ATCGGTTG 0.0333275429933  
ATCGTAAA 0.257330333088  
ATCGTAAC 0.251418084751  
ATCGTAAG 0.224302815212  
ATCGTAAT 0.329130748962  
ATCGTACA 0.163029276731  
ATCGTACC 0.147733261315  
ATCGTACG 0.112656657153  
ATCGTAGA 0.110738450983  
ATCGTAGC 0.1347612826  
ATCGTAGG 0.148254314921  
ATCGTATA 0.275570336176  
ATCGTATC 0.341507120282  
ATCGTATG 0.161521025157  
ATCGTCAA 0.168710904141  
ATCGTCAC -0.0208204084671  
ATCGTCAG 0.165497453376  
ATCGTCAT 0.0924264432166  
ATCGTCCA 0.133854239915  
ATCGTCCC 0.125882644906  
ATCGTCCG 0.149595994248  
ATCGTCGA 0.262222277374  
ATCGTCGC 0.130582250966  
ATCGTCGG 0.11373218949  
ATCGTCTA 0.241874265527  
ATCGTCTC 0.234691941052  
ATCGTCTG -0.0259651248513  
ATCGTGAA 0.145968282332  
ATCGTGAC 0.157695086969  
ATCGTGAG 0.234840842901  
ATCGTGCA 0.119859419137  
ATCGTGCC 0.203739505623  
ATCGTGCG 0.238563044395  
ATCGTGGA 0.332506141896  
ATCGTGGC 0.0227549761684  
ATCGTGGG 0.0653881172366  
ATCGTGTA 0.342934826245

ATCGTGTC 0.303271461209  
ATCGTGTG 0.0596592775341  
ATCGTTAA 0.193147693148  
ATCGTTAC 0.0641837213221  
ATCGTTAG -0.0970668648738  
ATCGTTCA 0.108465214526  
ATCGTTCC -0.189401956162  
ATCGTTCCG 0.100067151814  
ATCGTTGA 0.200452266918  
ATCGTTGC 0.110464458949  
ATCGTTGG 0.0330178663512  
ATCGTTTA 0.145484364407  
ATCGTTTC 0.0617468230623  
ATCGTTTG -0.01447924498  
ATCTAAAA 0.286179864674  
ATCTAAAC 0.283367389428  
ATCTAAAG 0.203367279125  
ATCTAAAT 0.307259695043  
ATCTAACA 0.153593789393  
ATCTAACC 0.278924549097  
ATCTAACG 0.132445117294  
ATCTAAGA 0.253269636431  
ATCTAAGC 0.262507390349  
ATCTAAGG 0.0106106354524  
ATCTAATA 0.291749085786  
ATCTAATC 0.281186144823  
ATCTAATG 0.282501509774  
ATCTACAA 0.309855572375  
ATCTACAC 0.362548498912  
ATCTACAG 0.201307367974  
ATCTACAT 0.257490272642  
ATCTACCA 0.286369948101  
ATCTACCC 0.103043815165  
ATCTACCG 0.116163149712  
ATCTACGA 0.351171142238  
ATCTACGC 0.229646796056  
ATCTACGG 0.150997423414  
ATCTACTA 0.360257074663  
ATCTACTC 0.212712712713  
ATCTACTG 0.195896998927  
ATCTAGAA 0.273888163033  
ATCTAGAC 0.294036460703  
ATCTAGAG 0.300425588057  
ATCTAGAT 0.337012874259  
ATCTAGCA 0.30546119428  
ATCTAGCC 0.211846833059  
ATCTAGCG 0.232500748159  
ATCTAGGA 0.375012407872  
ATCTAGGC 0.0171357262359  
ATCTAGGG 0.18386677664  
ATCTAGTA 0.272217120702  
ATCTAGTC 0.253891520624  
ATCTAGTG 0.145371269242  
ATCTATAA 0.212015065364

ATCTATAC 0.316228841704  
ATCTATAG 0.297354641785  
ATCTATCA 0.254120511696  
ATCTATCC 0.162575813588  
ATCTATCG 0.216534716535  
ATCTATGA 0.255377619468  
ATCTATGC 0.205474352929  
ATCTATGG 0.196748246389  
ATCTATTA 0.380974390153  
ATCTATTC 0.364139621715  
ATCTATTG 0.189927957782  
ATCTCAA 0.33099056225  
ATCTCAAC 0.384568951045  
ATCTCAAG 0.214601870032  
ATCTCAAT 0.193092851981  
ATCTCACA 0.348409158924  
ATCTCACC 0.311907768443  
ATCTCACG 0.240139996934  
ATCTCAGA 0.305712048136  
ATCTCAGC 0.199991970979  
ATCTCAGG 0.201594855587  
ATCTCATA 0.319665262804  
ATCTCATC 0.275513805817  
ATCTCATG 0.318558717692  
ATCTCCAA 0.299675779755  
ATCTCCAC 0.4058424816  
ATCTCCAG 0.310581432861  
ATCTCCAT 0.306052559744  
ATCTCCCA 0.317014225966  
ATCTCCCC 0.316701824048  
ATCTCCCG 0.243983653075  
ATCTCCGA 0.329031481062  
ATCTCCGC 0.358056403511  
ATCTCCGG 0.27404290417  
ATCTCCTA 0.349541001056  
ATCTCCTC 0.307639248776  
ATCTCCTG 0.310173810174  
ATCTCGAA 0.409137756108  
ATCTCGAC 0.409362568703  
ATCTCGAG 0.249276643994  
ATCTCGCA 0.338713179641  
ATCTCGCC 0.331468174295  
ATCTCGCG 0.327510706299  
ATCTCGGA 0.363009761877  
ATCTCGGC 0.359198575576  
ATCTCGGG 0.157569542273  
ATCTCGTA 0.396504456107  
ATCTCGTC 0.317571877988  
ATCTCGTG 0.411689525047  
ATCTCTAA 0.231211725291  
ATCTCTAC 0.314034478119  
ATCTCTAG 0.277225316234  
ATCTCTCA 0.285400319701  
ATCTCTCC 0.200220882039

ATCTCTCG 0.188038948052  
ATCTCTGA 0.370251016401  
ATCTCTGC 0.332289803873  
ATCTCTGG 0.217957627049  
ATCTCTTA 0.347208089632  
ATCTCTTC 0.280671927517  
ATCTCTTG 0.396802259805  
ATCTGAAA 0.310377874937  
ATCTGAAC 0.378998270111  
ATCTGAAG 0.247917928804  
ATCTGAAT 0.348111355226  
ATCTGACA 0.259454798124  
ATCTGACC 0.145272001343  
ATCTGACG 0.131761237822  
ATCTGAGA 0.340704218156  
ATCTGAGC 0.275406377963  
ATCTGAGG 0.286890798012  
ATCTGATA 0.348137632023  
ATCTGATC 0.275822654611  
ATCTGATG 0.205215214265  
ATCTGCAA 0.3076547622  
ATCTGCAC 0.411152310533  
ATCTGCAG 0.279750808376  
ATCTGCAT 0.272902378963  
ATCTGCCA 0.218779385446  
ATCTGCCC 0.206226674626  
ATCTGCCG 0.134994854127  
ATCTGCGA 0.373606388758  
ATCTGCGC 0.272889644752  
ATCTGCGG 0.175179311543  
ATCTGCTA 0.370790629575  
ATCTGCTC 0.229258483391  
ATCTGCTG 0.302881406191  
ATCTGGAA 0.391719159434  
ATCTGGAC 0.41642882552  
ATCTGGAG 0.27285840137  
ATCTGGCA 0.226605393272  
ATCTGGCC 0.277368378795  
ATCTGGCG 0.270092625709  
ATCTGGGA 0.392672286612  
ATCTGGGC 0.180862462866  
ATCTGGGG 0.16593724225  
ATCTGGTA 0.299128486238  
ATCTGGTC 0.238537112326  
ATCTGGTG 0.332923366642  
ATCTGTAA 0.348029605191  
ATCTGTAC 0.295514522787  
ATCTGTAG 0.260692483311  
ATCTGTCA 0.226721312672  
ATCTGTCC -0.0186076217309  
ATCTGTCC 0.201827171524  
ATCTGTGA 0.413461299849  
ATCTGTGC 0.193148325219  
ATCTGTGG 0.118864043106

ATCTGTTA 0.366791238148  
ATCTGTTC 0.250370429845  
ATCTGTTG 0.350493784808  
ATCTTAAA 0.257012620162  
ATCTTAAC 0.321376281113  
ATCTTAAG 0.210420939687  
ATCTTAAT 0.326196506646  
ATCTTACA 0.207895223047  
ATCTTACC 0.200637276395  
ATCTTACG 0.29878104859  
ATCTTAGA 0.352532973745  
ATCTTAGC 0.190719181332  
ATCTTAGG 0.0280321643958  
ATCTTATA 0.344911026729  
ATCTTATC 0.328170186054  
ATCTTATG 0.249555849142  
ATCTTCAA 0.316240482907  
ATCTTCAC 0.357935070056  
ATCTTCAG 0.318755394513  
ATCTTCAT 0.268171499894  
ATCTTCCA 0.355179813581  
ATCTTCCC 0.287263052634  
ATCTTCCG 0.361803952713  
ATCTTCGA 0.388373221707  
ATCTTCGC 0.223158756886  
ATCTTCGG 0.311148660978  
ATCTTCTA 0.333545250834  
ATCTTCTC 0.301802863737  
ATCTTCTG 0.350651445589  
ATCTTGAA 0.271254644059  
ATCTTGAC 0.310439578383  
ATCTTGAG 0.238744407057  
ATCTTGCA 0.286774012248  
ATCTTGCC 0.27465344132  
ATCTTGCG 0.242577899754  
ATCTTGGA 0.255260833704  
ATCTTGGC 0.0901812369072  
ATCTTGGG 0.168801413108  
ATCTTGTA 0.282223746925  
ATCTTGTC 0.297541308037  
ATCTTGTG 0.370437005236  
ATCTTTAA 0.298727415944  
ATCTTTAC 0.228853884905  
ATCTTTAG 0.232186732187  
ATCTTTCA 0.17799245272  
ATCTTTCC 0.156109720225  
ATCTTTCG 0.136113077816  
ATCTTTGA 0.272279166219  
ATCTTTGC 0.172107369077  
ATCTTTGG 0.312763224163  
ATCTTTTA 0.313236206506  
ATCTTTTC 0.267122494395  
ATCTTTTG 0.301300799839  
ATGAAAAA 0.0929811755947

ATGAAAAC 0.134722877147  
ATGAAAAG 0.151038693505  
ATGAAAAT 0.371415954395  
ATGAAACA 0.16784966785  
ATGAAACC -0.0676622800125  
ATGAAACG 0.102593761961  
ATGAAAGA 0.0340492007159  
ATGAAAGC 0.114086468311  
ATGAAAGG -0.0826654756883  
ATGAAATA 0.18564192025  
ATGAAATC 0.453957212616  
ATGAAATG -0.0415877348996  
ATGAACAA 0.0198145804206  
ATGAACAC 0.0330757755  
ATGAACAG 0.00586783582192  
ATGAACAT -0.0922005763053  
ATGAACCA 0.091276103443  
ATGAACCC -0.309449198672  
ATGAACCG -0.289169512878  
ATGAACGA -0.0153335153335  
ATGAACGC -0.214342030903  
ATGAACGG -0.165103683861  
ATGAACTA -0.176183790143  
ATGAACTC -0.246652441092  
ATGAACTG -0.149188313031  
ATGAAGAA 0.159389416965  
ATGAAGAC -0.0288876885908  
ATGAAGAG -0.0390983269771  
ATGAAGCA -0.124492361645  
ATGAAGCC -0.418669345172  
ATGAAGCG -0.142410306885  
ATGAAGGA 0.129377855052  
ATGAAGGC -0.0421578115823  
ATGAAGGG -0.109585094387  
ATGAAGTA -0.0944517505769  
ATGAAGTC -0.227717707769  
ATGAAGTG 0.167297796399  
ATGAATAA 0.218406166288  
ATGAATAC 0.0743870592355  
ATGAATAG 0.0210665210665  
ATGAATCA 0.27874017268  
ATGAATCC 0.219617818588  
ATGAATCG 0.0894489530853  
ATGAATGA 0.0991264858426  
ATGAATGC -0.0654937674219  
ATGAATGG -0.0418166025561  
ATGAATTA -0.0755873958964  
ATGAATTC 0.119335126429  
ATGAATTG 0.223610663005  
ATGACAAA 0.0978540615899  
ATGACAAC -0.129804583322  
ATGACAAG -0.00204729880636  
ATGACAAT 0.198999291986  
ATGACACA 0.142588869862

ATGACACC -0.199370080911  
ATGACACG -0.0455213787627  
ATGACAGA 0.0278191778982  
ATGACAGC -0.110174141019  
ATGACAGG -0.0934523453381  
ATGACATA -0.182218067008  
ATGACATC 0.00927006031124  
ATGACATG 0.0508185952132  
ATGACCAA 0.00309701247418  
ATGACCAC -0.0984482091633  
ATGACCAG -0.142185445252  
ATGACCAT -0.181566996629  
ATGACCCA -0.102657754173  
ATGACCCC -0.255891295299  
ATGACCCG -0.0722041618758  
ATGACCGA -0.193214302451  
ATGACCGC -0.136973955939  
ATGACCGG 0.0829249075614  
ATGACCTA -0.253793581629  
ATGACCTC -0.249604597216  
ATGACCTG -0.306651838255  
ATGACGAA -0.0198917926191  
ATGACGAC -0.0523057090576  
ATGACGAG -0.0483941241517  
ATGACGCA -0.00894943906338  
ATGACGCC -0.306483152938  
ATGACGCG -0.263038689418  
ATGACGGA 0.147499689788  
ATGACGGC -0.0997822269773  
ATGACGGG -0.250445455912  
ATGACGTA 0.017878760303  
ATGACGTC -0.227123493851  
ATGACGTG 0.072018299291  
ATGACTAA -0.0647496770144  
ATGACTAC 0.0080166127749  
ATGACTAG 0.00460923100235  
ATGACTCA -0.00702539360452  
ATGACTCC -0.127014628155  
ATGACTCG -0.0153865243827  
ATGACTGA -0.183250208845  
ATGACTGC -0.132618237498  
ATGACTGG -0.247562458134  
ATGACTTA -0.0461740693002  
ATGACTTC -0.165650192825  
ATGACTTG 0.0257008970606  
ATGAGAAA 0.129867959096  
ATGAGAAC 0.0827976737068  
ATGAGAAG 0.124139617381  
ATGAGAAT 0.317258029379  
ATGAGACA 0.114220280887  
ATGAGACC -0.344184856753  
ATGAGACG -0.0378316003673  
ATGAGAGA 0.14542025461  
ATGAGAGC -0.187653524552

ATGAGAGG -0.167133161037  
ATGAGATA 0.209288117778  
ATGAGATC 0.372031999299  
ATGAGATG 0.0499076662555  
ATGAGCAA -0.083451713357  
ATGAGCAC -0.0185378215681  
ATGAGCAG 0.0398732065399  
ATGAGCAT -0.228483301491  
ATGAGCCA 0.0161271310519  
ATGAGCCC -0.308564797588  
ATGAGCCG -0.259316097112  
ATGAGCGA 0.0291957110428  
ATGAGCGC -0.134776418649  
ATGAGCGG -0.341930380183  
ATGAGCTA -0.264816974489  
ATGAGCTC -0.29601420211  
ATGAGCTG -0.0793788652048  
ATGAGGAA 0.0435749582126  
ATGAGGAC -0.18399632727  
ATGAGGAG -0.124707137738  
ATGAGGCA -0.213299695979  
ATGAGGCC -0.210101232683  
ATGAGGCG -0.0608633269938  
ATGAGGGA 0.106096607688  
ATGAGGGC -0.193986478104  
ATGAGGGG -0.248991765974  
ATGAGGTA -0.079989168658  
ATGAGGTC -0.241473587128  
ATGAGGTG 0.0811974920257  
ATGAGTAA 0.245864321622  
ATGAGTAC 0.0221447705525  
ATGAGTAG 0.000159850514222  
ATGAGTCA -0.0753963329721  
ATGAGTCC -0.308664026086  
ATGAGTCG -0.0381546389495  
ATGAGTGA -0.0976287827586  
ATGAGTGC -0.05255578345  
ATGAGTGG -0.16074790831  
ATGAGTTA -0.252581270385  
ATGAGTTC -0.0888309015131  
ATGAGTTG -0.0623174400663  
ATGATAAA 0.150526559617  
ATGATAAC -0.0497952599578  
ATGATAAG 0.0719772559725  
ATGATAAT 0.0448304051736  
ATGATACA 0.0897495291435  
ATGATACC 0.0435807975008  
ATGATACG 0.126040305687  
ATGATAGA 0.193572360239  
ATGATAGC -0.0729651779978  
ATGATAGG -0.0771870890097  
ATGATATA 0.0549966059137  
ATGATATC 0.422914650187  
ATGATATG 0.266264887477



ATGATCAA 0.0689463568251  
ATGATCAC -0.0613503864648  
ATGATCAG 0.075664766465  
ATGATCAT 0.0943933116674  
ATGATCCA 0.14947628884  
ATGATCCC 0.0496252822791  
ATGATCCG 0.121131846043  
ATGATCGA 0.0948526674598  
ATGATCGC 0.220949176295  
ATGATCGG -0.112688211177  
ATGATCTA -0.0812398496717  
ATGATCTC 0.254697342394  
ATGATCTG -0.00378750830274  
ATGATGAA 0.0341757137875  
ATGATGAC -0.0177223706891  
ATGATGAG 0.121893243105  
ATGATGCA 0.0644332219942  
ATGATGCC -0.0880542941512  
ATGATGCG -0.0523154008002  
ATGATGGA 0.184596687664  
ATGATGGC -0.0935980897392  
ATGATGGG -0.124941065535  
ATGATGTA 0.0733115333241  
ATGATGTC -0.059106004978  
ATGATGTG 0.0353882761691  
ATGATTAA 0.271479456654  
ATGATTAC 0.289494728889  
ATGATTAG 0.0784238301351  
ATGATTCA 0.11974922581  
ATGATTCC 0.269964161369  
ATGATTCCG 0.204393098332  
ATGATTGA -0.149683583571  
ATGATTGC 0.31660724085  
ATGATTGG -0.101941662543  
ATGATTTA 0.195461301522  
ATGATTTT 0.377754501726  
ATGATTTG 0.295201564929  
ATGCAAAA 0.0955154266695  
ATGCAAAC -0.0846342209979  
ATGCAAAG -0.136281102352  
ATGCAAAT 0.289944214187  
ATGCAACA 0.0237388962285  
ATGCAACC -0.138757234119  
ATGCAACG 0.0462551914922  
ATGCAAGA 0.0757187798807  
ATGCAAGC -0.256412588935  
ATGCAAGG 0.0756560075327  
ATGCAATA 0.0888411202674  
ATGCAATC 0.449869710882  
ATGCAATG -0.141512325632  
ATGCACAA -0.0487364304763  
ATGCACAC 0.123452653756  
ATGCACAG 0.0518784260199  
ATGCACAT -0.0373108618059

ATGCACCA 0.031467194149  
ATGCACCC -0.157270684259  
ATGCACCG -0.0890628920932  
ATGCACGA -0.132263441359  
ATGCACGC -0.227422130304  
ATGCACGG -0.102670811533  
ATGCACTA -0.0199944526762  
ATGCACTC -0.172934020454  
ATGCACTG 0.0651219316365  
ATGCAGAA 0.0972418699691  
ATGCAGAC -0.0305621044795  
ATGCAGAG -0.00490281234717  
ATGCAGCA -0.246686825672  
ATGCAGCC -0.312073950951  
ATGCAGCG -0.0648892178028  
ATGCAGGA 0.158187112733  
ATGCAGGC -0.149883018488  
ATGCAGGG 0.0392684831719  
ATGCAGTA -0.042812785237  
ATGCAGTC -0.316421489569  
ATGCAGTG 0.138734918213  
ATGCATAA 0.215711334788  
ATGCATAC 0.156196141045  
ATGCATAG 0.0496916125924  
ATGCATCA 0.0382115720094  
ATGCATCC -0.194797564675  
ATGCATCG -0.0527954934611  
ATGCATGA -0.131124440844  
ATGCATGC -0.250058586911  
ATGCATGG -0.043945530553  
ATGCATTA 0.0602765299735  
ATGCATTC 0.0038415217185  
ATGCATTG 0.0421414129618  
ATGCCAAA 0.00968372955337  
ATGCCAAC -0.0935274117092  
ATGCCAAG -0.0992525317695  
ATGCCAAT -0.00889250600352  
ATGCCACA 0.0768764187646  
ATGCCACC -0.223034087307  
ATGCCACG -0.0969651898873  
ATGCCAGA -0.13421968862  
ATGCCAGC -0.237466956649  
ATGCCAGG -0.120458680012  
ATGCCATA -0.113076306675  
ATGCCATC -0.0426368451381  
ATGCCATG -0.265470487553  
ATGCCCAA 0.106572118859  
ATGCCCAC 0.0631292745414  
ATGCCCAG -0.244940919631  
ATGCCCAT 0.0375955271052  
ATGCCCCA -0.0514591870458  
ATGCCCCC -0.162984022248  
ATGCCCCG -0.0943341279237  
ATGCCCGA -0.124609757557

ATGCCCGC -0.0271974344714  
ATGCCCGG -0.185518060649  
ATGCCCTA -0.241780038319  
ATGCCCTC -0.332438943048  
ATGCCCTG -0.248635078578  
ATGCCGAA 0.185048685049  
ATGCCGAC -0.0782401548426  
ATGCCGAG -0.100281745655  
ATGCCGCA 0.10589515135  
ATGCCGCC -0.237975849165  
ATGCCGCG -0.0630008102012  
ATGCCGGA 0.0557651315227  
ATGCCGGC 0.0639511543543  
ATGCCGGG -0.0577192288435  
ATGCCGTA 0.0944380779983  
ATGCCGTC 0.0523280512106  
ATGCCGTG -0.00851678124405  
ATGCCTAA 0.115166130318  
ATGCCTAC 0.115745640606  
ATGCCTAG -0.100684029007  
ATGCCTCA -0.115496224545  
ATGCCTCC -0.308910719159  
ATGCCTCG -0.0918468938636  
ATGCCTGA -0.0595508901959  
ATGCCTGC -0.112617828617  
ATGCCTGG -0.23724449218  
ATGCCTTA -0.181902507163  
ATGCCTTC -0.246671102764  
ATGCCTTG 0.0557127375309  
ATGCGAAA 0.223836704306  
ATGCGAAC -0.0741158952724  
ATGCGAAG 0.0128351491988  
ATGCGAAT 0.307578928791  
ATGCGACA 0.0204822939673  
ATGCGACC -0.344265842009  
ATGCGACG -0.157539987813  
ATGCGAGA -0.0752024836634  
ATGCGAGC -0.052549794974  
ATGCGAGG -0.159525956069  
ATGCGATA 0.117424587122  
ATGCGATC 0.347457122291  
ATGCGATG 0.0148729997215  
ATGCGCAA 0.236708067598  
ATGCGCAC -0.0100665403696  
ATGCGCAG -0.12218499676  
ATGCGCAT 0.16639930099  
ATGCGCCA -0.0181667554725  
ATGCGCCC -0.239153452283  
ATGCGCCG -0.0174223810587  
ATGCGCGA 0.127302233363  
ATGCGCGC 0.0099714039108  
ATGCGCGG -0.110969124009  
ATGCGCTA -0.163957505879  
ATGCGCTC -0.264328247116

ATGCGCTG -0.0759395759396  
ATGCGGAA 0.0590656918288  
ATGCGGAC -0.218671342359  
ATGCGGAG -0.143659910189  
ATGCGGCA -0.14873217924  
ATGCGGCC -0.329196547775  
ATGCGGCG -0.172655377745  
ATGCGGGA -0.0699286240065  
ATGCGGGC -0.195720541583  
ATGCGGGG -0.227472918761  
ATGCGGTA 0.0226289816192  
ATGCGGTC -0.162834773739  
ATGCGGTG 0.107918074787  
ATGCGTAA 0.272902378963  
ATGCGTAC 0.0765990525755  
ATGCGTAG -0.139854539038  
ATGCGTCA -0.0668751779158  
ATGCGTCC -0.217386386359  
ATGCGTCG 0.109558914768  
ATGCGTGA -0.165388539476  
ATGCGTGC -0.255671057963  
ATGCGTGG -0.303634097831  
ATGCGTTA -0.19305635643  
ATGCGTTC -0.093847474227  
ATGCGTTG 0.0428187703919  
ATGCTAAA 0.0116273298091  
ATGCTAAC -0.000638379426258  
ATGCTAAG 0.0727290643271  
ATGCTAAT 0.0853930205908  
ATGCTACA -0.0319130456362  
ATGCTACC -0.211833734908  
ATGCTACG 0.000630106690713  
ATGCTAGA 0.0170294261203  
ATGCTAGC -0.124900382476  
ATGCTAGG 0.0253228031503  
ATGCTATA 0.021422564145  
ATGCTATC -0.134356911892  
ATGCTATG -0.147575523597  
ATGCTCAA -0.067411175911  
ATGCTCAC 0.00253145707691  
ATGCTCAG -0.126676903361  
ATGCTCCA 0.0452566732115  
ATGCTCCC -0.158064243042  
ATGCTCCG -0.109229250592  
ATGCTCGA -0.202544899475  
ATGCTCGC -0.226600604923  
ATGCTCGG -0.181656182536  
ATGCTCTA -0.122347391435  
ATGCTCTC -0.221956168719  
ATGCTCTG -0.214733055191  
ATGCTGAA -0.0523032342357  
ATGCTGAC -0.114541202452  
ATGCTGAG -0.109054062535  
ATGCTGCA -0.121802442282

ATGCTGCC -0.18697400814  
ATGCTGCG 0.0424742523886  
ATGCTGGA 0.0860378284621  
ATGCTGGC -0.206129650305  
ATGCTGGG -0.189464889045  
ATGCTGTA 0.102859057405  
ATGCTGTC 0.0696211031875  
ATGCTGTG 0.176912184405  
ATGCTTAA 0.226228529553  
ATGCTTAC 0.049072602083  
ATGCTTAG -0.0507153502888  
ATGCTTCA -0.253879761326  
ATGCTTCC -0.0738433335815  
ATGCTTCG -0.084648001578  
ATGCTTGA -0.20923506496  
ATGCTTGC -0.23349425981  
ATGCTTGG -0.0796430255354  
ATGCTTTA -0.179924195429  
ATGCTTTC -0.0659308068399  
ATGCTTTG -0.113674547464  
ATGGA AAA -0.0423412393109  
ATGGA AAC -0.0521168551472  
ATGGA AAG -0.127448385024  
ATGGA AAT 0.306302169939  
ATGGA ACA -0.0163916118625  
ATGGA ACC -0.248953017433  
ATGGA ACG -0.118605837504  
ATGGA AGA -0.0113824029732  
ATGGA AGC -0.189222456547  
ATGGA AGG -0.133155237961  
ATGGA ATA 0.103177655905  
ATGGA ATC 0.360146648025  
ATGGA ATG -0.187631807468  
ATGGA CAA 0.0202475202475  
ATGGA CAC 0.0482843441384  
ATGGA CAG -0.0864647868296  
ATGGA CAT -0.0672476884598  
ATGGA CCA -0.219623462458  
ATGGA CCC -0.225167201019  
ATGGA CCG -0.325460277151  
ATGGA CGA -0.110912504069  
ATGGA CGC -0.17972153506  
ATGGA CGG -0.0833366176069  
ATGGA CTA -0.0545576980101  
ATGGA CTC -0.193367484694  
ATGGA CTG -0.297441326397  
ATGGA GAA 0.03388465946  
ATGGA GAC -0.204490097327  
ATGGA GAG -0.247570732305  
ATGGA GCA -0.14728005669  
ATGGA GCC -0.281022848495  
ATGGA GCG -0.131747570123  
ATGGA GGA -0.133694815991  
ATGGA GGC -0.277843939958

ATGGAGGG -0.113703841542  
ATGGAGTA 0.00115535282999  
ATGGAGTC -0.0940880185536  
ATGGAGTG -0.0570887031206  
ATGGATAA 0.197736303797  
ATGGATAC 0.282393086283  
ATGGATAG 0.194791209943  
ATGGATCA -0.00230395684941  
ATGGATCC 0.253654118173  
ATGGATCG -0.0223622840376  
ATGGATGA 0.0187249379241  
ATGGATGC -0.0845623409459  
ATGGATGG -0.0767067639979  
ATGGATTA 0.334983744075  
ATGGATTC 0.432687605381  
ATGGATTG 0.16764815369  
ATGGCAAA 0.0618052159442  
ATGGCAAC -0.225738264369  
ATGGCAAG -0.111304112867  
ATGGCAAT 0.28408064057  
ATGGCACA 0.0926891078406  
ATGGCACC -0.315866548559  
ATGGCACG -0.136217955735  
ATGGCAGA 0.158002354972  
ATGGCAGC -0.247742904795  
ATGGCAGG -0.19550112906  
ATGGCATA 0.0250650099135  
ATGGCATC -0.14209908099  
ATGGCATG -0.128906816285  
ATGGCCAA -0.0930328377473  
ATGGCCAC -0.00174959672416  
ATGGCCAG -0.276199455789  
ATGGCCAT -0.45383068127  
ATGGCCCA -0.239997927258  
ATGGCCCC -0.246877592818  
ATGGCCCG -0.375763157242  
ATGGCCGA -0.244380349833  
ATGGCCGC -0.208359176653  
ATGGCCGG -0.243598761856  
ATGGCCTA -0.0927719706955  
ATGGCCTC -0.311132063508  
ATGGCCTG -0.0349261512997  
ATGGCGAA -0.0327941723904  
ATGGCGAC -0.265464991295  
ATGGCGAG -0.0194650309686  
ATGGCGCA -0.118567476625  
ATGGCGCC -0.104685850089  
ATGGCGCG -0.15489923673  
ATGGCGGA -0.0986326525548  
ATGGCGGC -0.164551317885  
ATGGCGGG -0.212554902107  
ATGGCGTA -0.0407596281696  
ATGGCGTC -0.264396538327  
ATGGCGTG -0.160080119324

ATGGCTAA 0.0546039137829  
ATGGCTAC -0.29663399909  
ATGGCTAG -0.00917133201463  
ATGGCTCA -0.0439676503434  
ATGGCTCC -0.195226709756  
ATGGCTCG -0.106538121117  
ATGGCTGA -0.160852665095  
ATGGCTGC -0.118033324786  
ATGGCTGG -0.306952415557  
ATGGCTTA -0.138361635445  
ATGGCTTC -0.189880287805  
ATGGCTTG 0.0158806969364  
ATGGGAAA 0.154068889002  
ATGGGAAC -0.161333454637  
ATGGGAAG -0.0233609201678  
ATGGGAAT 0.265319038046  
ATGGGACA -0.123441166172  
ATGGGACC -0.225820974151  
ATGGGACG -0.272317183094  
ATGGGAGA -0.080774165111  
ATGGGAGC -0.28421692426  
ATGGGAGG -0.106432833784  
ATGGGATA 0.229060041202  
ATGGGATC 0.187974715882  
ATGGGATG -0.179144510328  
ATGGGCAA -0.0344284260936  
ATGGGCAC -0.141667578829  
ATGGGCAG -0.233349595782  
ATGGGCCA -0.0127829317606  
ATGGGCCC -0.353429244698  
ATGGGCCG -0.215191323497  
ATGGGCGA -0.0349004231814  
ATGGGCGC -0.100892154673  
ATGGGCGG -0.123220000496  
ATGGGCTA -0.063481821566  
ATGGGCTC -0.139873838256  
ATGGGCTG -0.11728594151  
ATGGGGAA 0.0587162378166  
ATGGGGAC -0.17172807344  
ATGGGGAG 0.0106578327006  
ATGGGGCA -0.0668251468143  
ATGGGGCC -0.222940286288  
ATGGGGCG -0.15299357628  
ATGGGGGA -0.0404378006321  
ATGGGGGC -0.0968795021917  
ATGGGGGG -0.352573617241  
ATGGGGTA 0.0555125932525  
ATGGGGTC -0.191334893968  
ATGGGGTG 0.165000036496  
ATGGGTAA 0.0444356927611  
ATGGGTAC -0.0994634660712  
ATGGGTAG 0.0124919693498  
ATGGGTCA -0.163455044177  
ATGGGTCC -0.163189189636

ATGGGTCG -0.251763859522  
ATGGGTGA -0.0234489835538  
ATGGGTGC -0.0710722882597  
ATGGGTGG -0.0282086280349  
ATGGGTTA -0.0145034842005  
ATGGGTTC -0.082669821359  
ATGGGTTG -0.217857697919  
ATGGTAAA 0.115331585029  
ATGGTAAC -0.174641774954  
ATGGTAAG 0.0357036503958  
ATGGTAAT 0.298608789589  
ATGGTACA -0.0675774044387  
ATGGTACC -0.195834677386  
ATGGTACG 0.176894525379  
ATGGTAGA 0.183779189518  
ATGGTAGC 0.0551088278361  
ATGGTAGG 0.0249330306636  
ATGGTATA 0.158236749146  
ATGGTATC 0.156303686607  
ATGGTATG -0.116745842364  
ATGGTCAA -0.0743808107157  
ATGGTCAC -0.215110140781  
ATGGTCAG -0.0689062493158  
ATGGTCCA 0.0510614934114  
ATGGTCCC -0.221415315255  
ATGGTCCG -0.0421261836745  
ATGGTCGA -0.200685054239  
ATGGTCGC -0.159562746606  
ATGGTCGG -0.314147412655  
ATGGTCTA -0.202835151973  
ATGGTCTC 0.0047775047775  
ATGGTCTG -0.168771555467  
ATGGTGAA 0.044718271991  
ATGGTGAC -0.301494767075  
ATGGTGAG -0.0774083313748  
ATGGTGCA -0.00530255093178  
ATGGTGCC -0.262871432345  
ATGGTGCG -0.149351311853  
ATGGTGGA -0.0403093362919  
ATGGTGGC -0.141825524818  
ATGGTGGG -0.182646905565  
ATGGTGTA -0.052003794428  
ATGGTGTC -0.0968307263345  
ATGGTGTG 0.16995759217  
ATGGTTAA -0.048876833172  
ATGGTTAC -0.0585425276148  
ATGGTTAG -0.0339995643026  
ATGGTTCA 0.103246644234  
ATGGTTCC -0.00641080852244  
ATGGTTCG -0.106563910027  
ATGGTTGA -0.0605890965464  
ATGGTTGC -0.0409072984831  
ATGGTTGG -0.123642956401  
ATGGTTTA 0.0123814806975



ATGGTTTC -0.00466048188726  
ATGGTTTG -0.10668882779  
ATGTAAAA 0.021090779034  
ATGTAAAC 0.0777403599341  
ATGTAAAG 0.212467610198  
ATGTAAAT 0.201912656458  
ATGTAACA 0.166559126442  
ATGTAACC -0.143139165381  
ATGTAACG -0.0194545770367  
ATGTAAGA 0.0593877506332  
ATGTAAGC -0.252160198993  
ATGTAAGG -0.233822489392  
ATGTAATA 0.0700438730742  
ATGTAATC 0.454162220513  
ATGTAATG -0.0342891100467  
ATGTACAA 0.0690196565039  
ATGTACAC 0.13687103081  
ATGTACAG 0.0665362332029  
ATGTACAT 0.0570329576432  
ATGTACCA 0.0370219867484  
ATGTACCC -0.0791406027605  
ATGTACCG -0.128253276448  
ATGTACGA 0.0757698736524  
ATGTACGC -0.0360992095064  
ATGTACGG -0.0488977127022  
ATGTACTA -0.0693218396677  
ATGTACTC 0.0118774350448  
ATGTACTG -0.0255738925425  
ATGTAGAA 0.0604855368131  
ATGTAGAC -0.0663200734546  
ATGTAGAG 0.124717025743  
ATGTAGCA 0.0115990160799  
ATGTAGCC -0.403878620384  
ATGTAGCG -0.313325434358  
ATGTAGGA 0.172514830351  
ATGTAGGC 0.0154576063667  
ATGTAGGG -0.0836385426444  
ATGTAGTA 0.275669145931  
ATGTAGTC -0.163692478803  
ATGTAGTG -0.013505240778  
ATGTATAA 0.161986963789  
ATGTATAC 0.201104355379  
ATGTATAG 0.0904031298585  
ATGTATCA 0.236044584529  
ATGTATCC 0.167579425155  
ATGTATCG -0.0715524477566  
ATGTATGA -0.0272293307446  
ATGTATGC 0.134270782392  
ATGTATGG -0.0728437624523  
ATGTATTA 0.16374166989  
ATGTATTC 0.0901548931852  
ATGTATTG 0.111465442363  
ATGTCAAA -0.0424056407524  
ATGTCAAC 0.00293586689496

ATGTCAAG -0.0583006701557  
ATGTCAAT -0.112693398574  
ATGTCACA 0.19732633592  
ATGTCACC -0.245038684903  
ATGTCACG 0.0813863314887  
ATGTCAGA -0.0420035647085  
ATGTCAGC -0.127473359887  
ATGTCAGG -0.20974444858  
ATGTCATA 0.0441374526635  
ATGTCATC -0.00287074005679  
ATGTCATG 0.021240248513  
ATGTCCAA -0.11357616921  
ATGTCCAC 0.130252842374  
ATGTCCAG 0.0568184638293  
ATGTCCCA -0.0243645849706  
ATGTCCCC -0.317403998048  
ATGTCCCG -0.141750504633  
ATGTCCGA -0.173792884809  
ATGTCCGC -0.298713303693  
ATGTCCGG -0.141091092187  
ATGTCCTA -0.103453695661  
ATGTCCTC -0.285073655296  
ATGTCCTG -0.349944621742  
ATGTCGAA 0.0240921731641  
ATGTCGAC -0.151030571689  
ATGTCGAG 0.0380393130077  
ATGTCGCA 0.0471146077207  
ATGTCGCC -0.0273316335393  
ATGTCGCG -0.137142252359  
ATGTCGGA 0.0134473316291  
ATGTCGGC -0.121234210983  
ATGTCGGG -0.180819183573  
ATGTCGTA 0.104383998323  
ATGTCGTC -0.119685396801  
ATGTCGTG 0.0106103099948  
ATGTCTAA -0.0578774366653  
ATGTCTAC -0.0454625081203  
ATGTCTAG -0.183185039744  
ATGTCTCA 0.158389962264  
ATGTCTCC -0.085277694649  
ATGTCTCG -0.0875871331285  
ATGTCTGA -0.0179176963984  
ATGTCTGC -0.128785678105  
ATGTCTGG -0.327965509341  
ATGTCTTA 0.0657087800997  
ATGTCTTC -0.0891388791167  
ATGTCTTG 0.138600578207  
ATGTGAAA 0.0914512820887  
ATGTGAAC 0.206179648322  
ATGTGAAG 0.0524973905681  
ATGTGAAT 0.0521119975475  
ATGTGACA 0.0588257190362  
ATGTGACC -0.233973696325  
ATGTGACG -0.111760456389

ATGTGAGA 0.0753273935092  
ATGTGAGC -0.134414472541  
ATGTGAGG -0.0782413806693  
ATGTGATA 0.213647146413  
ATGTGATC 0.228742516621  
ATGTGATG -0.0875637759757  
ATGTGCAA -0.0205067326279  
ATGTGCAC -0.053240683294  
ATGTGCAG -0.0393597220499  
ATGTGCCA 0.00203718166755  
ATGTGCCC -0.148236841452  
ATGTGCCG -0.00992314036919  
ATGTGCGA 0.0725027919097  
ATGTGCGC -0.0295475281563  
ATGTGCGG -0.106353445495  
ATGTGCTA -0.0972715090453  
ATGTGCTC -0.195778006768  
ATGTGCTG -0.0627263636563  
ATGTGGAA 0.0532535783888  
ATGTGGAC -0.369097730474  
ATGTGGAG 0.0630909248827  
ATGTGGCA -0.0481490577104  
ATGTGGCC -0.200335240473  
ATGTGGCG -0.191637317905  
ATGTGGGA 0.0592067326993  
ATGTGGGC -0.0868345948629  
ATGTGGGG -0.258090150835  
ATGTGGTA 0.0999211696094  
ATGTGGTC -0.0851378592083  
ATGTGGTG 0.116981413008  
ATGTGTAA 0.255330905163  
ATGTGTAC 0.147978511419  
ATGTGTAG 0.0700152551404  
ATGTGTCA 0.136175850164  
ATGTGTCC -0.205804993892  
ATGTGTCCG -0.265529099409  
ATGTGTGA 0.107015904761  
ATGTGTGC 0.142536294826  
ATGTGTGG -0.153024175206  
ATGTGTTA 0.0800646701167  
ATGTGTTC -0.0410421669598  
ATGTGTTG 0.023740637531  
ATGTTAAA 0.185133902177  
ATGTTAAC 0.15438017371  
ATGTTAAG -0.0234647448577  
ATGTTAAT 0.184290350957  
ATGTTACA 0.194225906347  
ATGTTACC -0.053699797328  
ATGTTACG 0.0121374599173  
ATGTTAGA 0.0772990621475  
ATGTTAGC 0.0247607716619  
ATGTTAGG -0.0269432056232  
ATGTTATA 0.0847086756178  
ATGTTATC 0.0754165967169

ATGTTATG -0.156182258495  
ATGTTCAA -0.00080245534791  
ATGTTCAC 0.0183025189229  
ATGTTCAG -0.203663267247  
ATGTTCCA 0.160822025795  
ATGTTCCC -0.139075849204  
ATGTTCCG 0.0107712969789  
ATGTTCGA -0.182566075195  
ATGTTCGC -0.179866021585  
ATGTTCGG 0.0304396108891  
ATGTTCTA -0.0666704133573  
ATGTTCTC -0.00872419345186  
ATGTTCTG 0.0251397264202  
ATGTTGAA -0.0459530083283  
ATGTTGAC 0.118133909476  
ATGTTGAG 0.0466405845127  
ATGTTGCA 0.0733474521353  
ATGTTGCC -0.0194809134203  
ATGTTGCG 0.100652654044  
ATGTTGGA 0.115246100095  
ATGTTGGC -0.0162504101898  
ATGTTGGG -0.146921607068  
ATGTTGTA 0.109202866779  
ATGTTGTC 0.0521162490252  
ATGTTGTG 0.171899155493  
ATGTTTAA 0.0771832438499  
ATGTTTAC -0.052731795156  
ATGTTTAG 0.198710303594  
ATGTTTCA 0.295327007448  
ATGTTTCC 0.0440564531474  
ATGTTTCG -0.0437837127654  
ATGTTTGA -0.0526987042139  
ATGTTTGC -0.183872773242  
ATGTTTGG -0.0767947498311  
ATGTTTTA -0.0046351266447  
ATGTTTTC 0.00530718305439  
ATGTTTTG 0.0397765012445  
ATTAAAAA -0.0652024651528  
ATTAAAAC -0.127630051897  
ATTAAAAG 0.221947694576  
ATTAAAAT 0.154387169539  
ATTAAACA 0.0581973157731  
ATTAAACC 0.0209126807442  
ATTAAACG -0.0547352977672  
ATTAAAGA 0.225551998279  
ATTAAAGC -0.0757871673943  
ATTAAAGG -0.0740988885856  
ATTAAATA 0.122671036401  
ATTAAATC 0.2644393705  
ATTAAATG 0.10233863492  
ATTAACAA 0.230716942838  
ATTAACAC 0.0961195355135  
ATTAACAG 0.231331882847  
ATTAACCA -0.0557127375309

ATTAACCC -0.130003666851  
ATTAACCG -0.191357412048  
ATTAACGA -0.0300838028111  
ATTAACGC -0.23738914939  
ATTAACGG -0.10190234249  
ATTAACTA -0.0774893350651  
ATTAACTC -0.00598308066247  
ATTAACTG 0.0253592792077  
ATTAAGAA 0.183942896064  
ATTAAGAC 0.0496240041695  
ATTAAGAG 0.250612871825  
ATTAAGCA 0.203507915629  
ATTAAGCC -0.18086819602  
ATTAAGCG 0.0774924636687  
ATTAAGGA 0.250960197952  
ATTAAGGC 0.00908759999669  
ATTAAGGG 0.0606350151805  
ATTAAGTA 0.236721093699  
ATTAAGTC 0.089071772151  
ATTAAGTG 0.1500032846  
ATTAATAA 0.0533631535846  
ATTAATAC 0.146958253019  
ATTAATAG 0.211507650902  
ATTAATCA 0.0880878520908  
ATTAATCC 0.129505538596  
ATTAATCG 0.141194913922  
ATTAATGA 0.107734137209  
ATTAATGC -0.0357167361299  
ATTAATGG -0.0505935482553  
ATTAATTA 0.078479305752  
ATTAATTC 0.052147599895  
ATTAATTG 0.158145749055  
ATTACAAA 0.259946862477  
ATTACAAC 0.271890347648  
ATTACAAG 0.269864893469  
ATTACAAT 0.333930349082  
ATTACACA 0.280505022929  
ATTACACC 0.301011861925  
ATTACACG 0.256169392533  
ATTACAGA 0.24161489313  
ATTACAGC 0.13657654416  
ATTACAGG 0.0617847784355  
ATTACATA 0.201341164084  
ATTACATC 0.215010620205  
ATTACATG 0.252215644913  
ATTACCAA 0.33323510435  
ATTACCAC 0.191551279899  
ATTACCAG 0.204981140035  
ATTACCCA 0.209500227947  
ATTACCCC 0.30799749361  
ATTACCCG 0.101044570742  
ATTACCGA 0.148816860938  
ATTACCGC 0.29892564741  
ATTACCGG 0.178513223968

ATTACCTA 0.170345276406  
ATTACCTC 0.160194302315  
ATTACCTG 0.280705531996  
ATTACGAA 0.290134487104  
ATTACGAC 0.330062115428  
ATTACGAG 0.365567907272  
ATTACGCA 0.339507164077  
ATTACGCC 0.0865368914829  
ATTACGCG 0.360516922987  
ATTACGGA 0.38595206777  
ATTACGGC 0.244355963008  
ATTACGGG 0.276267672971  
ATTACGTA 0.332059151989  
ATTACGTC 0.207842829055  
ATTACGTG 0.334548397252  
ATTACTAA 0.164386911236  
ATTACTAC 0.261902398266  
ATTACTAG 0.254294431509  
ATTACTCA 0.270056557935  
ATTACTCC 0.19004766319  
ATTACTCG 0.228386788993  
ATTACTGA 0.124876392664  
ATTACTGC 0.0426984182965  
ATTACTGG 0.103440235445  
ATTACTTA 0.214678866194  
ATTACTTC 0.155919943359  
ATTACTTG 0.195105573893  
ATTAGAAA -0.00756844740626  
ATTAGAAC 0.130410285686  
ATTAGAAG 0.112317978438  
ATTAGAAT 0.148147850777  
ATTAGACA 0.0898746742772  
ATTAGACC -0.0571907184514  
ATTAGACG -0.0161872367758  
ATTAGAGA 0.0485938264126  
ATTAGAGC 0.0113836314496  
ATTAGAGG -0.0809638839942  
ATTAGATA 0.286356503142  
ATTAGATC 0.228524667919  
ATTAGATG 0.0598081793829  
ATTAGCAA 0.208558206755  
ATTAGCAC 0.00126159217068  
ATTAGCAG 0.10363984912  
ATTAGCCA 0.0868616015708  
ATTAGCCC -0.237116434127  
ATTAGCCG -0.0550178277451  
ATTAGCGA 0.211518725867  
ATTAGCGC -0.164170618743  
ATTAGCGG -0.128422055868  
ATTAGCTA -0.0122267437533  
ATTAGCTC 0.0317245620276  
ATTAGCTG 0.0688444778581  
ATTAGGAA -0.00791484339887  
ATTAGGAC 0.00354663766487

ATTAGGAG 0.0260386182214  
ATTAGGCA 0.153295168447  
ATTAGGCC -0.255127749248  
ATTAGGCG -0.0305746517868  
ATTAGGGA -0.0803479816858  
ATTAGGGC -0.119535219694  
ATTAGGGG -0.0679603785235  
ATTAGGTA 0.150769226527  
ATTAGGTC -0.02046368216  
ATTAGGTG 0.0885610128034  
ATTAGTAA 0.00900547816834  
ATTAGTAC 0.174255308278  
ATTAGTAG 0.123962805781  
ATTAGTCA -0.00304574546999  
ATTAGTCC -0.0483675539952  
ATTAGTCG -0.0457220305705  
ATTAGTGA -0.0415305112275  
ATTAGTGC -0.0799697816836  
ATTAGTGG 0.143625322073  
ATTAGTTA -0.050504733473  
ATTAGTTC -0.0282015722283  
ATTAGTTG 0.176086554874  
ATTATAAA 0.227778223835  
ATTATAAC 0.123792179733  
ATTATAAG 0.268638642949  
ATTATAAT 0.378456114818  
ATTATACA 0.0425177243359  
ATTATACC 0.0209010663556  
ATTATACG 0.109932629212  
ATTATAGA 0.209080823048  
ATTATAGC 0.0255861922529  
ATTATAGG 0.133242057484  
ATTATATA 0.133644663948  
ATTATATC 0.267795343553  
ATTATATG 0.148565921293  
ATTATCAA 0.107345824544  
ATTATCAC 0.129042265406  
ATTATCAG 0.184401071509  
ATTATCCA 0.260181669273  
ATTATCCC 0.306462632205  
ATTATCCG 0.285970543546  
ATTATCGA 0.0708325405295  
ATTATCGC 0.0101129172354  
ATTATCGG 0.0454172536368  
ATTATCTA 0.189195314613  
ATTATCTC 0.183970471849  
ATTATCTG 0.26873016267  
ATTATGAA 0.00646514282878  
ATTATGAC 0.056503142267  
ATTATGAG 0.0843423305975  
ATTATGCA 0.185183536127  
ATTATGCC 0.0802602862711  
ATTATGCG 0.170673428249  
ATTATGGA 0.255518604003

ATTATGGC 0.078482223017  
ATTATGGG 0.00929541688868  
ATTATGTA 0.236190268429  
ATTATGTC 0.0590257147654  
ATTATGTG 0.144032462214  
ATTATTAA 0.258052708638  
ATTATTAC 0.214715736152  
ATTATTAG 0.250443420947  
ATTATTCA 0.198596668294  
ATTATTCC 0.221614855149  
ATTATTCT 0.21049393079  
ATTATTGA 0.122777047019  
ATTATTGC -0.00350138318139  
ATTATTGG 0.172159003817  
ATTATTTA 0.0880207002766  
ATTATTTT 0.176007048721  
ATTATTTG 0.148428733595  
ATTCAAAA 0.00724553754857  
ATTCAAAC -0.116353007679  
ATTCAAAG 0.105921038225  
ATTCAAAT 0.213992229144  
ATTCACA 0.0263583142371  
ATTCACAC 0.181633248907  
ATTCACAG 0.0557888924734  
ATTCACAA -0.0179973361792  
ATTCACAGC -0.192144649507  
ATTCACAGG -0.182701559653  
ATTCACAATA 0.0351935957997  
ATTCACAATC 0.0532364320243  
ATTCACAATG 0.0751742662569  
ATTCACAAA 0.23353165248  
ATTCACAC 0.195621241076  
ATTCACAG 0.243030444589  
ATTCACCA 0.104872089721  
ATTCACCC 0.0306555330905  
ATTCACCG 0.0291227199404  
ATTCACGA -0.0083386782212  
ATTCACGC 0.0279285855054  
ATTCACGG 0.0376060214571  
ATTCACTA 0.0434143777873  
ATTCACTC -0.0400414188293  
ATTCACTG -0.0357699297093  
ATTCAGAA 0.142218053619  
ATTCAGAC 0.0808500543784  
ATTCAGAG 0.191029872848  
ATTCAGCA 0.0449186118357  
ATTCAGCC -0.0432818351754  
ATTCAGCG -0.0648109895404  
ATTCAGGA 0.262767238674  
ATTCAGGC -0.0580929247397  
ATTCAGGG 0.0628408590661  
ATTCAGTA 0.203636228251  
ATTCAGTC 0.108642146522  
ATTCAGTG 0.155070326927



ATTCATAA 0.159759275344  
ATTCATAC 0.128512810331  
ATTCATAG 0.0665196877318  
ATTCATCA 0.177846299748  
ATTCATCC 0.042149539668  
ATTCATCG 0.122603319573  
ATTCATGA 0.0296376753853  
ATTCATGC 0.0951626557687  
ATTCATGG 0.0111144202053  
ATTCATTA -0.0895525062791  
ATTCATTC 0.0137186776932  
ATTCATTG 0.0314663622602  
ATTCCAAA 0.0963825609658  
ATTCCAAC 0.21380313671  
ATTCCAAG 0.154103924732  
ATTCCAAT 0.131894192098  
ATTCCACA 0.13445814961  
ATTCCACC 0.251288657913  
ATTCCACG 0.264095676737  
ATTCCAGA 0.0560318968651  
ATTCCAGC 0.0355888775839  
ATTCCAGG 0.104537126924  
ATTCCATA 0.260112415316  
ATTCCATC 0.138968489741  
ATTCCATG 0.19800369335  
ATTCCCAA 0.332456223586  
ATTCCCAC 0.35038867762  
ATTCCCAG 0.255722664814  
ATTCCCCA 0.202668350905  
ATTCCCCC 0.353652550622  
ATTCCCCG 0.275138347768  
ATTCCCCGA 0.2855988555  
ATTCCCCGC 0.163255542043  
ATTCCCCGG 0.259774300816  
ATTCCCTA 0.369150310577  
ATTCCCTC 0.363911099384  
ATTCCCTG 0.284136753834  
ATTCCGAA 0.182740591832  
ATTCCGAC 0.0954745516522  
ATTCCGAG 0.246264170507  
ATTCCGCA 0.192527237982  
ATTCCGCC 0.161282590209  
ATTCCGCG 0.262434610919  
ATTCCGGA 0.250195251199  
ATTCCGGC 0.0378962504471  
ATTCCGGG 0.141407247468  
ATTCCGTA 0.28848638351  
ATTCCGTC 0.269704313044  
ATTCCGTG 0.287455749144  
ATTCCTAA 0.228233688313  
ATTCCTAC 0.168009607404  
ATTCCTAG 0.221053023465  
ATTCCTCA 0.354400268607  
ATTCCTCC 0.15336817442

ATTCCTCG 0.229980669375  
ATTCCTGA 0.100547027459  
ATTCCTGC 0.152874754567  
ATTCCTGG 0.20200635283  
ATTCCTTA 0.243310803917  
ATTCCTTC 0.0784986088016  
ATTCCTTG 0.30939337916  
ATTCGAAA 0.186859411838  
ATTCGAAC 0.130411012898  
ATTCGAAG 0.191282672642  
ATTCGAAT 0.0774905664018  
ATTCGACA 0.13200221893  
ATTCGACC -0.13967139748  
ATTCGACG 0.111677793496  
ATTCGAGA 0.243480069779  
ATTCGAGC -0.0158514777049  
ATTCGAGG 0.0759009698404  
ATTCGATA 0.204237133493  
ATTCGATC 0.204003574177  
ATTCGATG 0.0915713186568  
ATTCGCAA 0.370218900316  
ATTCGCAC 0.291622081268  
ATTCGCAG 0.329726356357  
ATTCGCCA 0.284939209182  
ATTCGCCC 0.269383152194  
ATTCGCCG 0.23392870437  
ATTCGCGA 0.359168047415  
ATTCGCGC 0.186462340241  
ATTCGCGG 0.254341145814  
ATTCGCTA 0.335107835108  
ATTCGCTC 0.191779012138  
ATTCGCTG 0.327224221367  
ATTCGGAA -0.00446683375934  
ATTCGGAC 0.100324842749  
ATTCGGAG 0.034343043583  
ATTCGGCA 0.219231580515  
ATTCGGCC 0.000667676040607  
ATTCGGCG 0.180506953234  
ATTCGGGA 0.323992175354  
ATTCGGGC 0.195942005608  
ATTCGGGG 0.0765379704774  
ATTCGGTA 0.279732900945  
ATTCGGTC 0.0730248154491  
ATTCGGTG 0.121471062677  
ATTCGTAA 0.211098297118  
ATTCGTAC 0.131324861499  
ATTCGTAG 0.172077035713  
ATTCGTCA 0.153020736772  
ATTCGTCC 0.0167521879083  
ATTCGTCCG 0.17392185574  
ATTCGTGA 0.167438788651  
ATTCGTGC 0.0338699581124  
ATTCGTGG 0.178802769712  
ATTCGTTA 0.16673502898

ATTCGTTTC 0.135022590746  
ATTCGTTG 0.0478159547189  
ATTCTAAA 0.210459771066  
ATTCTAAC 0.194598114506  
ATTCTAAG 0.16630803705  
ATTCTACA 0.122338196974  
ATTCTACC 0.234817485748  
ATTCTACG 0.241903863811  
ATTCTAGA 0.231565002226  
ATTCTAGC 0.208903117994  
ATTCTAGG 0.0812004116698  
ATTCTATA 0.228175295431  
ATTCTATC 0.197535000565  
ATTCTATG 0.147788284152  
ATTCTCAA 0.317860922754  
ATTCTCAC 0.287236272085  
ATTCTCAG 0.298448209163  
ATTCTCCA 0.350174950989  
ATTCTCCC 0.269727670197  
ATTCTCCG 0.299014620118  
ATTCTCGA 0.297502736897  
ATTCTCGC 0.234536189082  
ATTCTCGG 0.173899795112  
ATTCTCTA 0.239679073012  
ATTCTCTC 0.302154771852  
ATTCTCTG 0.373718093764  
ATTCTGAA 0.100730206791  
ATTCTGAC 0.313744482573  
ATTCTGAG 0.127639774673  
ATTCTGCA 0.210003430582  
ATTCTGCC 0.219530229265  
ATTCTGCG 0.228876010014  
ATTCTGGA 0.287415514688  
ATTCTGGC 0.21528001831  
ATTCTGGG 0.121570330577  
ATTCTGTA 0.198184711284  
ATTCTGTC 0.349693802325  
ATTCTGTG 0.182371918863  
ATTCTTAA 0.253078147018  
ATTCTTAC 0.256346941308  
ATTCTTAG 0.26160230068  
ATTCTTCA 0.376568028083  
ATTCTTCC 0.150390059481  
ATTCTTCG 0.0665663874262  
ATTCTTGA 0.189378083317  
ATTCTTGC 0.0748239089655  
ATTCTTGG 0.226832259148  
ATTCTTTA 0.312412963928  
ATTCTTTC 0.181859071395  
ATTCTTTG 0.263660649767  
ATTGAAAA 0.225620606848  
ATTGAAAC -0.0241783026649  
ATTGAAAG -0.00730421961563  
ATTGAAAT 0.247869081202

ATTGAACA -0.135800631297  
ATTGAACC 0.128612512135  
ATTGAACG 0.099392781211  
ATTGAAGA 0.0579775625351  
ATTGAAGC -0.120677928004  
ATTGAAGG -0.124057736232  
ATTGAATA 0.0846455917024  
ATTGAATC 0.075542141413  
ATTGAATG -0.00977423704696  
ATTGACAA 0.225492142508  
ATTGACAC -0.073171975857  
ATTGACAG 0.0555125932525  
ATTGACCA -0.0408815865346  
ATTGACCC -0.284698965543  
ATTGACCG -0.0645245814533  
ATTGACGA 0.00336873712683  
ATTGACGC -0.224627493143  
ATTGACGG -0.158534232036  
ATTGACTA -0.00980489478333  
ATTGACTC -0.142945372231  
ATTGACTG 0.00673747425367  
ATTGAGAA 0.107985226601  
ATTGAGAC 0.123758603826  
ATTGAGAG -0.0265458295761  
ATTGAGCA -0.0964580635838  
ATTGAGCC -0.298912399364  
ATTGAGCG 0.0388718128249  
ATTGAGGA 0.140167779405  
ATTGAGGC 0.0713057378306  
ATTGAGGG 0.0435727955227  
ATTGAGTA 0.068564192025  
ATTGAGTC -0.134587175257  
ATTGAGTG -0.023109712926  
ATTGATAA 0.0913806008655  
ATTGATAC 0.134107282322  
ATTGATAG 0.124737685344  
ATTGATCA 0.0924409257743  
ATTGATCC -0.0121318511273  
ATTGATCG 0.113671225397  
ATTGATGA -0.0336493518312  
ATTGATGC -0.118836757593  
ATTGATGG -0.240519454364  
ATTGATTA 0.193980481859  
ATTGATTC 0.321452306301  
ATTGATTG 0.181066741673  
ATTGCAA 0.20040656044  
ATTGCAAC 0.0837609395415  
ATTGCAAG 0.169586797369  
ATTGCAAT 0.262744660266  
ATTGCACA 0.262466515332  
ATTGCACC 0.226018029048  
ATTGCACG 0.283514229615  
ATTGCAGA 0.281432523375  
ATTGCAGC 0.0535921596528

ATTGCAGG -0.00487677760405  
ATTGCATA 0.332900009489  
ATTGCATC 0.173449486508  
ATTGCATG 0.250894144834  
ATTGCCAA 0.239713728896  
ATTGCCAC 0.160678963234  
ATTGCCAG 0.213931562416  
ATTGCCCA 0.21165594914  
ATTGCCCC 0.225883374817  
ATTGCCCG -0.0187184286944  
ATTGCCGA 0.166284679898  
ATTGCCGC -0.0203605809666  
ATTGCCGG -0.0278907056284  
ATTGCCTA 0.150028101574  
ATTGCCTC 0.180292973878  
ATTGCCTG 0.215158684856  
ATTGCGAA 0.298534071261  
ATTGCGAC 0.325395643577  
ATTGCGAG 0.203651309712  
ATTGCGCA 0.264273775027  
ATTGCGCC 0.25433092706  
ATTGCGCG 0.383188974098  
ATTGCGGA 0.33666310939  
ATTGCGGC 0.175863191015  
ATTGCGGG 0.192791965519  
ATTGCGTA 0.392520619793  
ATTGCGTC 0.271181652957  
ATTGCGTG 0.384464104028  
ATTGCTAA 0.12486660876  
ATTGCTAC 0.298950465617  
ATTGCTAG 0.128288412327  
ATTGCTCA 0.256017021525  
ATTGCTCC 0.00593568775387  
ATTGCTCG 0.0637786546877  
ATTGCTGA 0.181564384445  
ATTGCTGC -0.0610796843865  
ATTGCTGG 0.0492595052663  
ATTGCTTA 0.16120114605  
ATTGCTTC 0.120411231871  
ATTGCTTG 0.207396188405  
ATTGAAA 0.238948314706  
ATTGAAAC 0.100560571666  
ATTGAAAG 0.102140099122  
ATTGGACA -0.0795220487878  
ATTGGACC -0.253585163131  
ATTGGACG -0.100167879535  
ATTGGAGA 0.110210761726  
ATTGGAGC -0.0241969931903  
ATTGGAGG -0.185988360392  
ATTGGATA 0.354022066143  
ATTGGATC 0.200902003932  
ATTGGATG 0.0292013776862  
ATTGGCAA 0.096204462676  
ATTGGCAC -0.139846986876

ATTGGCAG -0.0357993598174  
ATTGGCCA -0.0804544426034  
ATTGGCCC -0.185146123367  
ATTGGCCG -0.120838421902  
ATTGGCGA 0.213942030466  
ATTGGCGC -0.0475869447133  
ATTGGCGG -0.0796961200301  
ATTGGCTA -0.089257169551  
ATTGGCTC -0.305941160419  
ATTGGCTG 0.095275946437  
ATTGGGAA 0.0247616762768  
ATTGGGAC 0.0373969010333  
ATTGGGAG -0.0375473529777  
ATTGGGCA -0.0795639511544  
ATTGGGCC -0.379187990729  
ATTGGGCG -0.0385574608532  
ATTGGGGA 0.090935287905  
ATTGGGGC -0.0565317383499  
ATTGGGGG -0.176309309919  
ATTGGGTA -0.172323963709  
ATTGGGTC -0.100369334978  
ATTGGGTG -0.117151523025  
ATTGGTAA 0.149520043459  
ATTGGTAC 0.194800843777  
ATTGGTAG 0.00969540812975  
ATTGGTCA 0.0644790796306  
ATTGGTCC -0.195875829803  
ATTGGTCG 0.118141180804  
ATTGGTGA 0.120300285395  
ATTGGTGC -0.0509693467183  
ATTGGTGG 0.118090114815  
ATTGGTTA 0.215813522332  
ATTGGTTC -0.0635555425794  
ATTGGTTG -0.102689759559  
ATTGTAAG 0.0151755800968  
ATTGTAAC 0.201048882141  
ATTGTAAG 0.127742139613  
ATTGTACA 0.0806106435625  
ATTGTACC 0.185302382272  
ATTGTACG 0.163960643198  
ATTGTAGA 0.177120004598  
ATTGTAGC -0.0974336328402  
ATTGTAGG -0.0489746306149  
ATTGTATA 0.222957891433  
ATTGTATC 0.041078662511  
ATTGTATG 0.116574819529  
ATTGTCAA 0.209691028664  
ATTGTCAC 0.081712038117  
ATTGTCAG 0.16158113326  
ATTGTCCA 0.213057410027  
ATTGTCCC 0.153587471769  
ATTGTCCG 0.143806340007  
ATTGTCGA 0.177570132116  
ATTGTCGC -0.0416318539659

ATTGTCGG 0.101623322117  
ATTGTCTA 0.170780973811  
ATTGTCTC 0.0239870659767  
ATTGTCTG 0.255740589074  
ATTGTGAA 0.173577950848  
ATTGTGAC 0.233553366256  
ATTGTGAG 0.249342715123  
ATTGTGCA 0.244884418589  
ATTGTGCC 0.155217200672  
ATTGTGCG 0.258323982501  
ATTGTGGA 0.315148573389  
ATTGTGGC 0.0899811657387  
ATTGTGGG 0.151152164551  
ATTGTGTA 0.243672046702  
ATTGTGTC 0.256300096781  
ATTGTGTG 0.234137208674  
ATTGTTAA 0.123894367277  
ATTGTTAC 0.159452841271  
ATTGTTAG 0.17553995168  
ATTGTTCA 0.0129829273812  
ATTGTTCC 0.0608475726809  
ATTGTTCG 0.194111844554  
ATTGTTGA 0.052587899535  
ATTGTTGC 0.137783789299  
ATTGTTGG 0.149867498352  
ATTGTTTA -0.0171480019965  
ATTGTTTC 0.0293942477107  
ATTGTTTG -0.0360696826066  
ATTTAAAA 0.218140478676  
ATTTAAAC 0.167698587984  
ATTTAAAG 0.237257919076  
ATTTAAAT 0.121648103589  
ATTTAACA 0.192786289351  
ATTTAACC 0.096389778208  
ATTTAACG -0.00422323149596  
ATTTAAGA 0.221057203127  
ATTTAAGC 0.00898301497048  
ATTTAAGG -0.0995001817388  
ATTTAATA 0.201293580081  
ATTTAATC 0.175149514852  
ATTTAATG 0.164677271261  
ATTTACAA 0.206172857529  
ATTTACAC 0.223505875021  
ATTTACAG 0.266551675643  
ATTTACCA 0.200167149624  
ATTTACCC 0.0748861809468  
ATTTACCG 0.0385385721481  
ATTTACGA 0.18063765027  
ATTTACGC 0.185714911352  
ATTTACGG -0.0496209948284  
ATTTACTA 0.132274114698  
ATTTACTC 0.0191775797836  
ATTTACTG 0.218161687859  
ATTTAGAA 0.255885361946

ATTTAGAC 0.143702589974  
ATTTAGAG 0.163443866193  
ATTTAGCA 0.111891083704  
ATTTAGCC -0.103531280244  
ATTTAGCG 0.0581498215368  
ATTTAGGA -0.000546703356861  
ATTTAGGC 0.13754112239  
ATTTAGGG 0.0922103895535  
ATTTAGTA 0.129689860806  
ATTTAGTC 0.0912110457565  
ATTTAGTG 0.0945490244739  
ATTTATAA 0.263565218111  
ATTTATAC 0.284213966032  
ATTTATAG 0.220789660184  
ATTTATCA 0.230067224805  
ATTTATCC 0.104539419808  
ATTTATCG 0.184778442354  
ATTTATGA 0.281225228645  
ATTTATGC -0.109817691873  
ATTTATGG -0.00551653581957  
ATTTATTA 0.254597572779  
ATTTATTC 0.25476565878  
ATTTATTG 0.250335394115  
ATTTCAAA 0.104921726134  
ATTTCAAC 0.25169302862  
ATTTCAAG 0.225654028684  
ATTTCACA 0.346079282935  
ATTTCACC 0.32022794144  
ATTTCACG 0.299543344998  
ATTTCAGA 0.244808507843  
ATTTCAGC 0.154080567579  
ATTTCAGG 0.117491587775  
ATTTCATA 0.360499405123  
ATTTCATC 0.276183003292  
ATTTCATG 0.318948726959  
ATTTCCAA 0.383514901854  
ATTTCCAC 0.321314427375  
ATTTCCAG 0.338261063814  
ATTTCCCA 0.331718771113  
ATTTCCCC 0.363906629782  
ATTTCCCG 0.308243615103  
ATTTCCGA 0.349157697643  
ATTTCCGC 0.348447114297  
ATTTCCGG 0.261075124711  
ATTTCCTA 0.381413093534  
ATTTCCTC 0.384212035727  
ATTTCCTG 0.361845316391  
ATTTCGAA 0.273078863988  
ATTTCGAC 0.371757552754  
ATTTCGAG 0.31212674175  
ATTTCGCA 0.347524506763  
ATTTCGCC 0.127514725955  
ATTTCGCG 0.291573943089  
ATTTCGGA 0.321396611753



ATTTCGGC 0.253102965224  
ATTTCGGG 0.313621599527  
ATTTCGTA 0.385279218613  
ATTTCGTC 0.295630752611  
ATTTCGTG 0.382747761536  
ATTTCTAA 0.0734721137493  
ATTTCTAC 0.324354211222  
ATTTCTAG 0.298848435212  
ATTTCTCA 0.324458066882  
ATTTCTCC 0.218915939174  
ATTTCTCG 0.336342269877  
ATTTCTGA 0.202731052645  
ATTTCTGC 0.254560119121  
ATTTCTGG 0.227547571951  
ATTTCTTA 0.312941322453  
ATTTCTTC 0.239728327117  
ATTTCTTG 0.332052438113  
ATTTGAAA 0.184161660694  
ATTTGAAC 0.232654029474  
ATTTGAAG 0.149995985489  
ATTTGACA 0.0948426681887  
ATTTGACC 0.152460165106  
ATTTGACG 0.134800089346  
ATTTGAGA 0.194700004833  
ATTTGAGC 0.105710823851  
ATTTGAGG 0.0224133778092  
ATTTGATA 0.260082396446  
ATTTGATC 0.156171032751  
ATTTGATG 0.121690561085  
ATTTGCAA 0.305834908725  
ATTTGCAC 0.363515397473  
ATTTGCAG 0.264854784202  
ATTTGCCA 0.394551214207  
ATTTGCCC 0.108330207036  
ATTTGCCG 0.253891520624  
ATTTGCGA 0.258341191652  
ATTTGCGC 0.220737266192  
ATTTGCGG 0.253864056894  
ATTTGCTA 0.17607552456  
ATTTGCTC 0.19672780888  
ATTTGCTG 0.188716305482  
ATTTGGAA 0.0829410677896  
ATTTGGAC 0.14541214426  
ATTTGGAG 0.0536214535448  
ATTTGGCA 0.158769515996  
ATTTGGCC -0.0730714835124  
ATTTGGCG 0.100602981729  
ATTTGGGA 0.232407338468  
ATTTGGGC 0.0804267059845  
ATTTGGGG 0.0779654460121  
ATTTGGTA 0.23547440567  
ATTTGGTC 0.177771435347  
ATTTGGTG 0.17231082531  
ATTTGTAA 0.230918301059

ATTTGTAC 0.210393727736  
ATTTGTAG 0.298646744962  
ATTTGTCA 0.212890958592  
ATTTGTCC 0.0404772158274  
ATTTGTCCG 0.162708115881  
ATTTGTGA 0.228662875995  
ATTTGTGC 0.0305533455472  
ATTTGTGG 0.126339433255  
ATTTGTTA 0.294679194481  
ATTTGTTA 0.11591206032  
ATTTGTTG 0.177859362611  
ATTTTAAA 0.251685435823  
ATTTTAAC 0.20026349788  
ATTTTAAG 0.23383300656  
ATTTTACA 0.263173069203  
ATTTTACC 0.19642124625  
ATTTTACG 0.155048429596  
ATTTTAGA 0.20439861349  
ATTTTAGC 0.00500881133808  
ATTTTAGG 0.129857740341  
ATTTTATA 0.230430142222  
ATTTTATC 0.246788110424  
ATTTTATG 0.25324043999  
ATTTTCAA 0.319256512631  
ATTTTCAC 0.355223608242  
ATTTTCAG 0.325285340437  
ATTTTCCA 0.298378137705  
ATTTTCCC 0.318549003369  
ATTTTCCG 0.344698693184  
ATTTTCGA 0.208759662197  
ATTTTCGC 0.137530092076  
ATTTTCGG 0.193273540258  
ATTTTCTA 0.365874010472  
ATTTTCTC 0.278001941563  
ATTTTCTG 0.371094793545  
ATTTTGAA 0.0126846925459  
ATTTTGAC 0.172747127293  
ATTTTGAG 0.236326941746  
ATTTTGCA 0.252286150334  
ATTTTGCC 0.15025291417  
ATTTTGCG 0.276401976599  
ATTTTGGA 0.356426501609  
ATTTTGGC 0.161476026072  
ATTTTGGG 0.260790250925  
ATTTTGTA 0.34529097903  
ATTTTGTC 0.365740625853  
ATTTTGTG 0.28815454573  
ATTTTTAA 0.240316073649  
ATTTTTAC 0.347489362641  
ATTTTTAG 0.237649540521  
ATTTTTCA 0.349433455494  
ATTTTTCC 0.0518686730808  
ATTTTTCCG 0.299597364568  
ATTTTTGA 0.27653113135

ATTTTTGC 0.0218644847193  
ATTTTTGG 0.117728078947  
ATTTTTTA 0.224998722656  
ATTTTTTC 0.285660168026  
ATTTTTTG 0.300208754553  
CAAAAAAA 0.0780150799618  
CAAAAAAC 0.262073823201  
CAAAAAAG 0.126516323486  
CAAAAACA -0.0910790274666  
CAAAAACC -0.151621318288  
CAAAAACG -0.13036165772  
CAAAAAGA 0.0976847222324  
CAAAAAGC 0.0670372181631  
CAAAAAGG 0.0477763260659  
CAAAAATA 0.143923125771  
CAAAAATC 0.402660247661  
CAAAAATG 0.055647686547  
CAAAACAA 0.108669275336  
CAAAACAC 0.0621818500325  
CAAAACAG 0.123196198954  
CAAAACCA -0.0776161836768  
CAAAACCC -0.106425536725  
CAAAACCG 0.0471194061444  
CAAAACGA -0.0369474157353  
CAAAACGC -0.0603406205282  
CAAAACGG -0.195765832697  
CAAAACTA 0.201406640801  
CAAAACTC -0.179912758876  
CAAAACTG -0.0120878454212  
CAAAAGAA -0.0380389075016  
CAAAAGAC -0.106340007153  
CAAAAGAG -0.0801221567898  
CAAAAGCA 0.0633346845468  
CAAAAGCC -0.199305220116  
CAAAAGCG -0.0110136274388  
CAAAAGGA 0.155613380729  
CAAAAGGC -0.400190412268  
CAAAAGGG -0.185001392232  
CAAAAGTA -0.100471284682  
CAAAAGTC -0.0747120564809  
CAAAAGTG -0.0977703907367  
CAAAATAA 0.258370254666  
CAAAATAC 0.246534017503  
CAAAATAG 0.211863243871  
CAAAATCA 0.311009356464  
CAAAATCC 0.423656438808  
CAAAATCG 0.364876268957  
CAAAATGA 0.109935548857  
CAAAATGC -0.177887783319  
CAAAATGG -0.0937197573141  
CAAAATTA 0.058707473559  
CAAAATTC 0.193539557528  
CAAAATTG 0.186081128213  
CAAACAAA -0.0742122435275

CAAACAAC -0.0736438196392  
CAAACAAG 0.042630785055  
CAAACACA -0.0012325764156  
CAAACACC -0.13848717391  
CAAACACG -0.0275506763414  
CAAACAGA 0.0215024488515  
CAAACAGC -0.0866169199503  
CAAACAGG 0.106035787854  
CAAACATA -0.157361686641  
CAAACATC -0.130996401539  
CAAACATG 0.0969082029688  
CAAACCAA 0.0444012174916  
CAAACCAC 0.0189362916636  
CAAACCAG 0.143286537226  
CAAACCCA -0.153871811624  
CAAACCCC -0.350237584434  
CAAACCCG -0.134878787127  
CAAACCGA -0.0637485420751  
CAAACCGC -0.10727470231  
CAAACCGG -0.131669447352  
CAAACCTA 0.129567235754  
CAAACCTC -0.0915121066913  
CAAACCTG -0.0238308650176  
CAAACGAA -0.0870294811063  
CAAACGAC 0.0293364990335  
CAAACGAG -0.103050292753  
CAAACGCA 0.0530024889966  
CAAACGCC -0.207532397655  
CAAACGCG 0.132603665613  
CAAACGGA 0.0673193855012  
CAAACGGC -0.237711592936  
CAAACGGG -0.0485102064539  
CAAACGTA -0.105227622753  
CAAACGTC -0.0385692284111  
CAAACGTG 0.0713261470837  
CAAACCTAA 0.160489186368  
CAAACCTAC 0.0656649854383  
CAAACCTAG 0.0959788990092  
CAAACCTCA 0.0172996688148  
CAAACCTCC -0.210559180872  
CAAACCTCG -0.0184849966789  
CAAACCTGA -0.0840689174023  
CAAACCTGC -0.281866049153  
CAAACCTGG -0.227356173559  
CAAACCTTA -0.0687816244089  
CAAACCTTC -0.216723143922  
CAAACCTTG -0.0406217382101  
CAAAGAAA 0.0903242994679  
CAAAGAAC 0.1200754728  
CAAAGAAG -0.0100968591929  
CAAAGACA 0.0291709751692  
CAAAGACC -0.130672487859  
CAAAGACG -0.0445931604892  
CAAAGAGA 0.101281723758

CAAAGAGC -0.186128563819  
CAAAGAGG -0.101656898024  
CAAAGATA 0.280797326252  
CAAAGATC 0.260857791435  
CAAAGATG -0.0158133339952  
CAAAGCAA 0.00656846930359  
CAAAGCAC -0.0286994983965  
CAAAGCAG 0.0514083633205  
CAAAGCCA -0.196944134309  
CAAAGCCC -0.285471935183  
CAAAGCCG -0.00832609504901  
CAAAGCGA 0.108776707944  
CAAAGCGC -0.176084484468  
CAAAGCGG -0.0900129304759  
CAAAGCTA -0.272662067879  
CAAAGCTC -0.210951057014  
CAAAGCTG 0.0646720161623  
CAAAGGAA -0.154194476838  
CAAAGGAC 0.0341429583854  
CAAAGGAG -0.141610902945  
CAAAGGCA -0.275462101476  
CAAAGGCC -0.293229093455  
CAAAGGCG -0.250634711919  
CAAAGGGA -0.110093716139  
CAAAGGGC -0.304649085812  
CAAAGGGG -0.209043699856  
CAAAGGTA -0.176382290914  
CAAAGGTC -0.0636633291925  
CAAAGGTG -0.0858415423935  
CAAAGTAA 0.0647194580242  
CAAAGTAC -0.0490311247887  
CAAAGTAG 0.0186178404852  
CAAAGTCA 0.0878054362903  
CAAAGTCC -0.229834007394  
CAAAGTCG 0.0143463022251  
CAAAGTGA 0.107039546433  
CAAAGTGC -0.23012011622  
CAAAGTGG -0.206097228081  
CAAAGTTA -0.269084696482  
CAAAGTTC -0.0175185944833  
CAAAGTTG 0.129017048416  
CAAATAAA 0.121941500729  
CAAATAAC 0.176031403304  
CAAATAAG 0.0654635299957  
CAAATACA 0.116224462238  
CAAATACC -0.0855741706068  
CAAATACG 0.183822981978  
CAAATAGA 0.147849095466  
CAAATAGC -0.164461041772  
CAAATAGG -0.0830882170472  
CAAATATA 0.252303267455  
CAAATATC 0.386662335861  
CAAATATG 0.254817047802  
CAAATCAA 0.202032611124

CAAATCAC 0.319901753976  
CAAATCAG 0.254859542738  
CAAATCCA 0.378262519799  
CAAATCCC 0.304871426173  
CAAATCCG 0.395604216169  
CAAATCGA 0.314552965993  
CAAATCGC 0.29334175164  
CAAATCGG 0.255138058168  
CAAATCTA 0.401508726086  
CAAATCTC 0.396273804223  
CAAATCTG 0.435507981577  
CAAATGAA 0.0107141970866  
CAAATGAC 0.085430975964  
CAAATGAG -0.0320926987594  
CAAATGCA 0.0158188491522  
CAAATGCC -0.13248806954  
CAAATGCG -0.13141452493  
CAAATGGA -0.0255779195173  
CAAATGGC -0.344784739824  
CAAATGGG -0.0356391528877  
CAAATGTA -0.0998309693862  
CAAATGTC -0.0213579264688  
CAAATGTG -0.0100399612798  
CAAATTAA -0.108436392715  
CAAATTAC 0.266008432675  
CAAATTAG -0.0172791836675  
CAAATTCA 0.236960504514  
CAAATTCC 0.168663153512  
CAAATTCT 0.284420779107  
CAAATTGA 0.034173291749  
CAAATTGC 0.0332452574031  
CAAATTGG 0.00998299307314  
CAAATTTA 0.0838069474433  
CAAATTTT 0.229285759589  
CAAATTTG 0.152386031935  
CAACAAAA 0.189787814865  
CAACAAAC 0.199090274848  
CAACAAAG 0.0429005204266  
CAACAACA -0.198940696075  
CAACAACC -0.248288742781  
CAACAACG -0.0317673044946  
CAACAAGA 0.0487250335735  
CAACAAGC 0.0348569009438  
CAACAAGG -0.19524065572  
CAACAATA 0.124043269125  
CAACAATC 0.110367656183  
CAACAATG 0.120794348067  
CAACACAA 0.104718144858  
CAACACAC -0.161846812722  
CAACACAG -0.170989691461  
CAACACCA -0.137447803477  
CAACACCC -0.28277635149  
CAACACCG -0.0893811975494  
CAACACGA -0.0143559073876

CAACACGC -0.280456165797  
CAACACGG -0.175718479924  
CAACACTA 0.00607908183666  
CAACACTC -0.195882601074  
CAACACTG 0.0992496514675  
CAACAGAA 0.088545959722  
CAACAGAC 0.0145834539774  
CAACAGAG -0.294863625859  
CAACAGCA -0.148278931967  
CAACAGCC -0.31906121085  
CAACAGCG -0.0135676426066  
CAACAGGA -0.0877346000067  
CAACAGGC -0.22450999038  
CAACAGGG -0.190957894783  
CAACAGTA -0.135765241826  
CAACAGTC -0.150364911178  
CAACAGTG 0.0372568483902  
CAACATAA 0.116456677063  
CAACATAC 0.00650334605221  
CAACATAG 0.0627161449019  
CAACATCA 0.0483436943604  
CAACATCC -0.0310832609505  
CAACATCG -0.00903362250156  
CAACATGA 0.0290685410825  
CAACATGC -0.0840439933718  
CAACATGG -0.0122997262132  
CAACATTA 0.149797721576  
CAACATTC -0.0147708316733  
CAACATTG 0.0463778165442  
CAACCAA 0.07330861368  
CAACCAAC -0.155688204357  
CAACCAAG -0.0744866900725  
CAACCACA -0.154768606256  
CAACCACC -0.229297360084  
CAACCACG -0.170915429957  
CAACCAGA 0.0508704296583  
CAACCAGC -0.0533057676337  
CAACCAGG -0.117481144714  
CAACCATA -0.0581191652738  
CAACCATC -0.15399778432  
CAACCATG -0.116237600636  
CAACCCAA -0.0548854639764  
CAACCCAC 0.00209968759737  
CAACCCAG 0.0106413728167  
CAACCCCA -0.09212222146  
CAACCCCC -0.365405976015  
CAACCCCG -0.0699882215745  
CAACCCGA -0.204603414859  
CAACCCGC 0.00750502568684  
CAACCCGG -0.22728554881  
CAACCCTA -0.198948967578  
CAACCCTC -0.166227369251  
CAACCCTG -0.0570975468424  
CAACCGAA -0.0531210176206

CAACCGAC 0.0158295803742  
CAACCGAG -0.296177308073  
CAACCGCA -0.158951727865  
CAACCGCC -0.147266066829  
CAACCGCG 0.13118532397  
CAACCGGA -0.0456749981384  
CAACCGGC -0.210948721978  
CAACCGGG -0.302895255419  
CAACCGTA 0.0157664551604  
CAACCGTC -0.12039449559  
CAACCGTG -0.16816656603  
CAACCTAA 0.0421371785008  
CAACCTAC -0.100916969185  
CAACCTAG -0.0812802776752  
CAACCTCA -0.120824203816  
CAACCTCC -0.268715284313  
CAACCTCG 0.0149171209777  
CAACCTGA -0.0108530470136  
CAACCTGC -0.208127113585  
CAACCTGG -0.247794902185  
CAACCTTA -0.310854430334  
CAACCTTC -0.150340096666  
CAACCTTG -0.223387392226  
CAACGAAA 0.149379940585  
CAACGAAC -0.0886425642545  
CAACGAAG 0.0679890044142  
CAACGACA -0.149157271617  
CAACGACC -0.118345479677  
CAACGACG -0.200935752579  
CAACGAGA 0.15118720028  
CAACGAGC -0.193566345196  
CAACGAGG 0.0183640941217  
CAACGATA 0.0827729111348  
CAACGATC 0.0971591426137  
CAACGATG -0.0382269321663  
CAACGCAA 0.161271650986  
CAACGCAC -0.103802836434  
CAACGCAG -0.142328009891  
CAACGCCA -0.234928121356  
CAACGCCC -0.184903454446  
CAACGCCG -0.269991921899  
CAACGCGA -0.0113992637631  
CAACGCGC -0.0558602377348  
CAACGCGG -0.163600067152  
CAACGCTA -0.237200712729  
CAACGCTC -0.28642202347  
CAACGCTG -0.115195895999  
CAACGGAA 0.0799794284643  
CAACGGAC 0.0401210192478  
CAACGGAG -0.291355513104  
CAACGGCA -0.10500657454  
CAACGGCC -0.248560964755  
CAACGGCG -0.232518046288  
CAACGGGA -0.0240643775522



CAACGGGC -0.231229378055  
CAACGGGG -0.0989716135567  
CAACGGTA -0.0944176654508  
CAACGGTC -0.169329826564  
CAACGGTG -0.232473372651  
CAACGTAA 0.143855977189  
CAACGTAC -0.0642793435214  
CAACGTAG -0.0806748757326  
CAACGTCA -0.0678678569082  
CAACGTCC -0.375787157099  
CAACGTCCG -0.0881462582303  
CAACGTGA -0.12690766777  
CAACGTGC -0.237828396869  
CAACGTGG -0.160084908131  
CAACGTTA -0.0180400786461  
CAACGTTC -0.0634358371714  
CAACGTTG 0.0777478728946  
CAACTAAA 0.136131999768  
CAACTAAC 0.026250768675  
CAACTAAG -0.145753936919  
CAACTACA -0.158520530511  
CAACTACC -0.0411609957065  
CAACTACG 0.0557242116236  
CAACTAGA 0.0320744801209  
CAACTAGC -0.153588446916  
CAACTAGG -0.0722614084717  
CAACTATA 0.141167338137  
CAACTATC -0.0278074202755  
CAACTATG 0.154203790567  
CAACTCAA -0.0654730258423  
CAACTCAC -0.152616167065  
CAACTCAG -0.131577205913  
CAACTCCA -0.111293084196  
CAACTCCC -0.223999242617  
CAACTCCG 0.0316617658006  
CAACTCGA -0.00116496127365  
CAACTCGC -0.0394363627074  
CAACTCGG 0.0634000876823  
CAACTCTA -0.0706759662448  
CAACTCTC -0.135819309485  
CAACTCTG -0.02470237878  
CAACTGAA -0.0487394990915  
CAACTGAC -0.0273360007824  
CAACTGAG -0.0444347304463  
CAACTGCA -0.242803669338  
CAACTGCC -0.115852107784  
CAACTGCG -0.148473711637  
CAACTGGA -0.113198251133  
CAACTGGC -0.267542509277  
CAACTGGG -0.191747378753  
CAACTGTA -0.127900560954  
CAACTGTC -0.202223487087  
CAACTGTG -0.0973163963454  
CAACTTAA -0.0698977214129

CAACTTAC -0.0332508817357  
CAACTTAG -0.215175656129  
CAACTTCA 0.136702845923  
CAACTTCC -0.0574648943591  
CAACTTCG -0.0477427501588  
CAACTTGA -0.0597873290816  
CAACTTGC -0.203431919846  
CAACTTGG -0.128951265315  
CAACTTTA -0.0802666732839  
CAACTTTC -0.199915918896  
CAAGAAAA -0.0576053683751  
CAAGAAAC -0.149021699632  
CAAGAAAG -0.0937528737394  
CAAGAACA 0.0157022137633  
CAAGAACC -0.149238337847  
CAAGAACG 0.0568216815522  
CAAGAAGA -0.0995154159129  
CAAGAAGC -0.0686415625935  
CAAGAAGG -0.0460697940921  
CAAGAATA 0.129042265406  
CAAGAATC 0.382452209076  
CAAGAATG -0.172893355993  
CAAGACAA 0.0234253316186  
CAAGACAC -0.205374435708  
CAAGACAG 0.107477208528  
CAAGACCA 0.0379608258396  
CAAGACCC -0.222258951962  
CAAGACCG -0.288493052663  
CAAGACGA -0.0770184160387  
CAAGACGC -0.135785469131  
CAAGACGG -0.13342319633  
CAAGACTA 0.0569410888813  
CAAGACTC -0.254299779967  
CAAGACTG -0.0746966727043  
CAAGAGAA 0.0505494202479  
CAAGAGAC -0.0701971683777  
CAAGAGAG -0.20130571394  
CAAGAGCA -0.129091657507  
CAAGAGCC -0.196927840225  
CAAGAGCG -0.0716434122632  
CAAGAGGA 0.0298164628308  
CAAGAGGC -0.304806798566  
CAAGAGGG -0.203179486331  
CAAGAGTA 0.0542520966694  
CAAGAGTC -0.215848039337  
CAAGAGTG -0.147816844909  
CAAGATAA 0.0762760005184  
CAAGATAC 0.247766107312  
CAAGATAG 0.173444794657  
CAAGATCA 0.205781539115  
CAAGATCC 0.320865236528  
CAAGATCG 0.266051838281  
CAAGATGA 0.0222440952596  
CAAGATGC -0.275404651652

CAAGATGG -0.259472437928  
CAAGATTA 0.316733265494  
CAAGATTC 0.408892363438  
CAAGATTG 0.318605431998  
CAAGCAAA 0.0793026430078  
CAAGCAAC -0.352278145732  
CAAGCAAG -0.0057115537616  
CAAGCACA -0.262175474574  
CAAGCACC -0.152832133176  
CAAGCACG -0.0780331634924  
CAAGCAGA 0.0153114547054  
CAAGCAGC -0.321458600394  
CAAGCAGG 0.0245826733721  
CAAGCATA -0.0412527468286  
CAAGCATC -0.159714020861  
CAAGCATG -0.204030428105  
CAAGCCAA -0.221256236748  
CAAGCCAC -0.276236468021  
CAAGCCAG -0.22357654764  
CAAGCCCA 0.028710389836  
CAAGCCCC -0.121883366281  
CAAGCCCG -0.322025935849  
CAAGCCGA -0.145965742339  
CAAGCCGC -0.326106908099  
CAAGCCGG -0.255987772237  
CAAGCCTA -0.172794938593  
CAAGCCTC -0.315598207187  
CAAGCCTG -0.196065509713  
CAAGCGAA -0.0808978612412  
CAAGCGAC -0.0434525636588  
CAAGCGAG -0.129218960492  
CAAGCGCA -0.0132578107551  
CAAGCGCC -0.190317094081  
CAAGCGCG 0.122413046655  
CAAGCGGA -0.207071812722  
CAAGCGGC -0.426449798154  
CAAGCGGG -0.0617885692351  
CAAGCGTA -0.148147688643  
CAAGCGTC -0.240397878797  
CAAGCGTG -0.370155132083  
CAAGCTAA -0.185624953473  
CAAGCTAC -0.21703006043  
CAAGCTAG -0.107279455764  
CAAGCTCA -0.105701198016  
CAAGCTCC -0.252688661169  
CAAGCTCG -0.194435194798  
CAAGCTGA -0.275136124363  
CAAGCTGC -0.266018989348  
CAAGCTGG -0.299396270107  
CAAGCTTA -0.108534119691  
CAAGCTTC -0.104165541443  
CAAGCTTG -0.188679830328  
CAAGGAAA -0.0779768940903  
CAAGGAAC -0.110915361902



CAAGTATA 0.183774683775  
CAAGTATC 0.267482463888  
CAAGTATG 0.147923038182  
CAAGTCAA -0.198411910533  
CAAGTCAC -0.0475889112253  
CAAGTCAG -0.123254454673  
CAAGTCCA 0.0312920155033  
CAAGTCCC -0.0372934536561  
CAAGTCCG -0.122095668213  
CAAGTCGA -0.281373156977  
CAAGTCGC -0.303131917052  
CAAGTCGG -0.00464250317115  
CAAGTCTA -0.16456746396  
CAAGTCTC -0.145319517158  
CAAGTCTG -0.197878277927  
CAAGTGAA -0.167014975085  
CAAGTGAC -0.0639964088378  
CAAGTGAG 0.0268960420476  
CAAGTGCA -0.000780506029164  
CAAGTGCC -0.181990083446  
CAAGTGCG -0.143263474584  
CAAGTGGA -0.0673146654534  
CAAGTGGC -0.31082982229  
CAAGTGGG -0.110690705592  
CAAGTGTA -0.1369033456  
CAAGTGTC -0.222071484972  
CAAGTGTG -0.295871338356  
CAAGTTAA -0.0389824304539  
CAAGTTAC -0.0836456135997  
CAAGTTAG 0.0228037955311  
CAAGTTCA 0.104183849989  
CAAGTTCC -0.1396274286  
CAAGTTCG -0.0333316789505  
CAAGTTGA -0.0474445988535  
CAAGTTGC -0.232182970208  
CAAGTTGG -0.199709684623  
CAAGTTTA -0.120033306589  
CAAGTTTC -0.0593251653858  
CAATAAAA 0.0695530240985  
CAATAAAC 0.0285409376318  
CAATAAAG 0.14216841967  
CAATAACA -0.106170909201  
CAATAACC -0.0582710141902  
CAATAACG -0.139109027237  
CAATAAGA 0.0415808412954  
CAATAAGC 0.191749815697  
CAATAAGG 0.0170515174827  
CAATAATA 0.0909656212687  
CAATAATC 0.26001897214  
CAATAATG 0.156895104487  
CAATACAA -0.0427410881956  
CAATACAC 0.0369678036247  
CAATACAG 0.193837361226  
CAATACCA 0.162450329117

CAATACCC 0.0332108968473  
CAATACCG -0.113328094194  
CAATACGA 0.0750071345261  
CAATACGC -0.196750612699  
CAATACGG -0.0467602899207  
CAATACTA -0.0724195820529  
CAATACTC 0.0370108400411  
CAATACTG 0.188992211849  
CAATAGAA 0.0311766019657  
CAATAGAC -0.006091107494  
CAATAGAG 0.0527280424516  
CAATAGCA 0.0920989860384  
CAATAGCC -0.147593038853  
CAATAGCG 0.044261074575  
CAATAGGA 0.0131581060269  
CAATAGGC -0.191320349005  
CAATAGGG -0.045728605811  
CAATAGTA 0.133151057393  
CAATAGTC 0.0156782126479  
CAATAGTG -0.0596986927294  
CAATATAA 0.216784127851  
CAATATAC 0.131681638832  
CAATATAG 0.271634197791  
CAATATCA 0.304890289739  
CAATATCC 0.361642926272  
CAATATCG 0.271220256069  
CAATATGA 0.143075166886  
CAATATGC -0.151765507857  
CAATATGG 0.105455835115  
CAATATTA 0.0851915651482  
CAATATTC 0.0935494723374  
CAATATTG 0.249609307171  
CAATCAAA 0.188041867696  
CAATCAAC 0.208638360176  
CAATCAAG 0.180066986358  
CAATCACA 0.120641883754  
CAATCACC 0.0877392544059  
CAATCACG 0.0902513083655  
CAATCAGA 0.134755968089  
CAATCAGC 0.263138033474  
CAATCAGG 0.264080885293  
CAATCATA 0.252008350182  
CAATCATC 0.0816918847222  
CAATCATG 0.103978634282  
CAATCCAA 0.251368448338  
CAATCCAC 0.284279176368  
CAATCCAG 0.295975270615  
CAATCCCA 0.282466077385  
CAATCCCC 0.135972060214  
CAATCCCG 0.248870082203  
CAATCCGA 0.354134580995  
CAATCCGC 0.229468697766  
CAATCCGG 0.33127755855  
CAATCCTA 0.292200170799

CAATCCTC 0.336207966249  
CAATCCTG 0.326167765562  
CAATCGAA 0.122332357686  
CAATCGAC 0.0780331042013  
CAATCGAG 0.0898805135654  
CAATCGCA 0.213198046531  
CAATCGCC 0.183043925468  
CAATCGCG 0.255372452342  
CAATCGGA 0.236524403191  
CAATCGGC -0.0410121272537  
CAATCGGG 0.177986613432  
CAATCGTA 0.203306612398  
CAATCGTC 0.188310474953  
CAATCGTG 0.184462384035  
CAATCTAA 0.359643949403  
CAATCTAC 0.326757706109  
CAATCTAG 0.374767705817  
CAATCTCA 0.349411394866  
CAATCTCC 0.387299302678  
CAATCTCG 0.398848930315  
CAATCTGA 0.410406274043  
CAATCTGC 0.266349641979  
CAATCTGG 0.414612129935  
CAATCTTA 0.295164310316  
CAATCTTC 0.323904776958  
CAATGAAA 0.0193083363138  
CAATGAAC -0.230528724427  
CAATGAAG 0.103167813843  
CAATGACA -0.0194484792304  
CAATGACC -0.161079786372  
CAATGACG -0.058595089938  
CAATGAGA 0.0893352965343  
CAATGAGC -0.306871963562  
CAATGAGG -0.0235599190171  
CAATGATA 0.139374912102  
CAATGATC 0.110125325723  
CAATGATG 0.0175142150172  
CAATGCAA 0.149864601505  
CAATGCAC -0.170823266644  
CAATGCAG 0.217359232511  
CAATGCCA -0.181278273525  
CAATGCCC -0.200187002258  
CAATGCCG -0.234394610811  
CAATGCGA -0.0468747491055  
CAATGCGC -0.261226875329  
CAATGCGG -0.175257476114  
CAATGCTA -0.0409397361128  
CAATGCTC -0.238412198208  
CAATGCTG -0.128424292061  
CAATGGAA -0.130552615636  
CAATGGAC -0.0828076757443  
CAATGGAG -0.0609576518667  
CAATGGCA -0.155437786202  
CAATGGCC -0.130728766036

CAATGGCG -0.275640155578  
CAATGGGA -0.0572053166719  
CAATGGGC -0.366351616184  
CAATGGGG 0.0140843322662  
CAATGGTA -0.106730333513  
CAATGGTC 0.0428337789947  
CAATGGTG -0.0276555987825  
CAATGTAA 0.158541578778  
CAATGTAC 0.00297146777808  
CAATGTAG -0.0370393349051  
CAATGTCA 0.132801449239  
CAATGTCC -0.165070911376  
CAATGTCCG -0.0948796634049  
CAATGTGA -0.0407969953424  
CAATGTGC -0.284738735562  
CAATGTGG -0.1234920241  
CAATGTTA 0.0423399487602  
CAATGTTC -0.247905348416  
CAATTAAC -0.0114720115618  
CAATTAAG 0.226861455589  
CAATTACA 0.197980336197  
CAATTACC 0.0810852174489  
CAATTACG 0.102324614736  
CAATTAGA 0.164836536426  
CAATTAGC -0.0688478622298  
CAATTAGG 0.140428311789  
CAATTATA 0.12180923257  
CAATTATC 0.148885800401  
CAATTATG 0.0896061350607  
CAATTCAC 0.0582028309301  
CAATTCAG 0.193323944711  
CAATTCBA 0.0957519178412  
CAATTCBC 0.252863805902  
CAATTCBG -0.0638384991439  
CAATTCGA -0.119195127533  
CAATTCGC -0.0964248958052  
CAATTCGG 0.0181513564497  
CAATTCTA 0.0182813667662  
CAATTCTC 0.000272973174182  
CAATTCTG 0.203480945673  
CAATTGAA 0.0368564156443  
CAATTGAC 0.12858844846  
CAATTGAG 0.088580315853  
CAATTGCA 0.097795668708  
CAATTGCC -0.0756253512697  
CAATTGCG 0.0841172528482  
CAATTGGA 0.00401089795029  
CAATTGGC -0.19531055035  
CAATTGGG -0.0321452505647  
CAATTGTA -0.0386629277614  
CAATTGTC -0.00804030076681  
CAATTGTG 0.106496208112



CAATTTAA 0.0713962467975  
CAATTTAC 0.0980656128248  
CAATTTAG 0.113922462407  
CAATTTCA 0.1400516777  
CAATTTCC 0.103327845752  
CAATTTCCG 0.321251003069  
CAATTTGA 0.0961443537201  
CAATTTGC -0.117685744108  
CAATTTGG -0.0926027027102  
CAATTTTA 0.0382904023999  
CAATTTTC 0.108332664248  
CACAAAAA 0.0754321814928  
CACAAAAC 0.0990453263181  
CACAAAAG -0.0335804123683  
CACAAACA 0.0406627312617  
CACAAACC -0.0350529592954  
CACAAACG 0.028451355464  
CACAAAGA 0.102855019209  
CACAAAGC -0.225359830603  
CACAAAGG -0.0566089505483  
CACAAATA 0.274507127581  
CACAAATC 0.261178952286  
CACAAATG -0.224591655295  
CACAAACA 0.0461938789662  
CACAAACAC 0.0163510618056  
CACAAACAG 0.0285174982145  
CACAAACCA 0.0950473980693  
CACAAACC -0.0661675697288  
CACAAACG -0.000598364837104  
CACAAACGA 0.112957836999  
CACAAACGC -0.143783308382  
CACAAACGG -0.152851132266  
CACAAACTA -0.0324728834173  
CACAAACTC 0.0717436844449  
CACAAACTG 0.0401268585359  
CACAAAGAA 0.0183678473995  
CACAAAGAC -0.113754443333  
CACAAAGAG -0.0566446909475  
CACAAAGCA -0.0939689145431  
CACAAAGCC -0.252244568604  
CACAAAGCG -0.0666817722951  
CACAAAGGA 0.00853041169318  
CACAAAGGC -0.430591649752  
CACAAAGGG -0.29458389821  
CACAAAGTA 0.160278680795  
CACAAAGTC -0.0675785978816  
CACAAAGTG -0.244389193039  
CACAAATA 0.123800938666  
CACAAATAC 0.191777176626  
CACAAATAG 0.169195565061  
CACAAATCA 0.347166725955  
CACAAATCC 0.406299862047  
CACAAATCG 0.27171886747  
CACAAATGA 0.00195925953502

CACAATGC 0.0320744801209  
CACAATGG -0.145547147445  
CACAATTA 0.0964559600923  
CACAATTC 0.170547360277  
CACACAAA 0.115279191037  
CACACAAC 0.084758312031  
CACACAAG -0.029592863741  
CACACACA 0.0951533908017  
CACACACC -0.164968504046  
CACACACG -0.0812810068991  
CACACAGA 0.209837010868  
CACACAGC -0.0721065418035  
CACACAGG 0.00224728450082  
CACACATA 0.231816264238  
CACACATC -0.0994408881557  
CACACATG 0.0307460420575  
CACACCAA -0.298914496625  
CACACCAC -0.0396811610986  
CACACCAG -0.138385016447  
CACACCCA 0.0564816665295  
CACACCCC -0.236795029755  
CACACCCG -0.204247271364  
CACACCGA -0.297144833936  
CACACCGC -0.285653310219  
CACACCGG -0.129601601204  
CACACCTA -0.191128673278  
CACACCTC 0.0845845845846  
CACACCTG -0.0579832419332  
CACACGAA -0.0680185732051  
CACACGAC -0.225482899865  
CACACGAG -0.0637781575994  
CACACGCA 0.0927709612198  
CACACGCC -0.138518064464  
CACACGCG 0.0296486885531  
CACACGGA 0.139447311373  
CACACGGC -0.190728347433  
CACACGGG -0.103897440088  
CACACGTA 0.0888620740998  
CACACGTC -0.0716312781472  
CACACGTG -0.24817330356  
CACACTAA -0.157261521751  
CACACTAC -0.0845331854047  
CACACTAG 0.00100237979026  
CACACTCA 0.102657754173  
CACACTCC 0.140264811719  
CACACTCG -0.115208059353  
CACACTGA 0.0512068542372  
CACACTGC -0.234059652344  
CACACTGG -0.186801297998  
CACACTTA -0.018437367254  
CACACTTC 0.0376772771399  
CACAGAAA 0.100297266964  
CACAGAAC -0.0976941128456  
CACAGAAG -0.0630762987842

CACAGACA -0.0823235205726  
CACAGACC -0.153115331319  
CACAGACG -0.208321272519  
CACAGAGA 0.258676031403  
CACAGAGC -0.335939654556  
CACAGAGG -0.278165268538  
CACAGATA 0.326272553545  
CACAGATC 0.291683393794  
CACAGATG -0.224160826048  
CACAGCAA 0.158442515857  
CACAGCAC -0.0306686714889  
CACAGCAG 0.0915142566444  
CACAGCCA 0.0254206112275  
CACAGCCC -0.331604536606  
CACAGCCG -0.298471571035  
CACAGCGA -0.00501465652981  
CACAGCGC 0.0516935668451  
CACAGCGG -0.108642474433  
CACAGCTA -0.0609334116369  
CACAGCTC -0.209552793422  
CACAGCTG -0.0757767265902  
CACAGGAA -0.106300258509  
CACAGGAC -0.161430544871  
CACAGGAG 0.0675372342039  
CACAGGCA -0.108140845402  
CACAGGCC -0.102130973549  
CACAGGCG -0.199366835639  
CACAGGGA 0.0242130950904  
CACAGGGC -0.286391686987  
CACAGGGG -0.176014416487  
CACAGGTA -0.00869251038298  
CACAGGTC -0.272655165721  
CACAGGTG -0.315237079126  
CACAGTAA 0.0428210579726  
CACAGTAC -0.0484050898137  
CACAGTAG -0.0634497191685  
CACAGTCA -0.0766591691638  
CACAGTCC -0.0713770733452  
CACAGTCG -0.23356684691  
CACAGTGA -0.105904974569  
CACAGTGC -0.181218234112  
CACAGTGG -0.239547583408  
CACAGTTA -0.00385757976103  
CACAGTTC -0.0338464839741  
CACATAAA 0.039991782416  
CACATAAC 0.00427654868871  
CACATAAG -0.00285906148041  
CACATACA 0.257286211832  
CACATACC -0.104136346451  
CACATACG 0.114860988446  
CACATAGA 0.228770902827  
CACATAGC -0.282414643896  
CACATAGG -0.0452747723156  
CACATATA 0.307537061232

CACATATC 0.228330036569  
CACATATG 0.0550141237783  
CACATCAA -0.184256019587  
CACATCAC 0.00441074683499  
CACATCAG 0.118274052393  
CACATCCA -0.002703917725  
CACATCCC -0.0833614321184  
CACATCCG -0.0512580016496  
CACATCGA 0.0984165984166  
CACATCGC -0.110011894598  
CACATCGG -0.328532916553  
CACATCTA 0.073920279118  
CACATCTC -0.0542713003011  
CACATCTG -0.14617125873  
CACATGAA 0.0681714772624  
CACATGAC 0.168594118377  
CACATGAG -0.053277795702  
CACATGCA 0.0128696189302  
CACATGCC -0.063548413112  
CACATGCG -0.218032158737  
CACATGGA -0.0237238504107  
CACATGGC -0.243382772515  
CACATGGG -0.317629659945  
CACATGTA 0.135128241189  
CACATGTC -0.218845102369  
CACATGTG -0.117304353218  
CACATTAA -0.0288876885908  
CACATTAC 0.0132810755143  
CACATTAG 0.0460115763146  
CACATTCA 0.169683457562  
CACATTCC 0.145368349598  
CACATTCCG 0.0323051320044  
CACATTGA -0.0939658666931  
CACATTGC -0.107552456037  
CACATTGG -0.225143851979  
CACATTTA 0.0748503324261  
CACATTTTC 0.0157887053568  
CACCAAAA -0.0651555075436  
CACCAAAC -0.0480443970259  
CACCAAAG -0.058799442348  
CACCAACA -0.146329081907  
CACCAACC -0.128500332027  
CACCAACG -0.30245466498  
CACCAAGA 0.159648629346  
CACCAAGC -0.284600766838  
CACCAAGG -0.113756060996  
CACCAATA 0.0795654109764  
CACCAATC 0.0942636851728  
CACCAATG -0.177761787791  
CACCACAA 0.14187645526  
CACCACAC 0.0182636570523  
CACCACAG 0.0550942149278  
CACCACCA -0.00897399310122  
CACCACCC 0.0411602588802

CACCACCG -0.0160075494502  
CACCACGA 0.0566929191332  
CACCACGC -0.173335924943  
CACCACGG -0.30023381875  
CACCACTA 0.086652768471  
CACCACTC -0.0665442484098  
CACCACTG -0.135506533109  
CACCAGAA -0.089240861957  
CACCAGAC -0.243431661994  
CACCAGAG -0.0697138295062  
CACCAGCA -0.140836837427  
CACCAGCC -0.128152853248  
CACCAGCG -0.196424363077  
CACCAGGA -0.00999467164953  
CACCAGGC -0.297648109426  
CACCAGGG -0.171823399533  
CACCAGTA 0.0710421164967  
CACCAGTC -0.26205072962  
CACCAGTG -0.341189702368  
CACCATAA -0.0190424584364  
CACCATAC 0.0887184952154  
CACCATAG -0.051330992752  
CACCATCA -0.0405334143981  
CACCATCC -0.267145857078  
CACCATCG -0.186246287978  
CACCATGA -0.0480527670283  
CACCATGC -0.122835223765  
CACCATGG -0.371487959657  
CACCATTA 0.0471421835058  
CACCATTC -0.12831218991  
CACCCAAA -0.0966905834179  
CACCCAAC -0.187931647685  
CACCCAAG -0.203870044581  
CACCCACA -0.125861799667  
CACCCACC -0.0841277626215  
CACCCACG -0.0636227452051  
CACCCAGA 0.115208426093  
CACCCAGC -0.259502760756  
CACCCAGG -0.206168421268  
CACCCATA 0.136276577885  
CACCCATC 0.101658357846  
CACCCATG -0.17768625797  
CACCCCAA -0.249858811271  
CACCCCAC -0.151381066201  
CACCCCAG 0.0453538724967  
CACCCCCA -0.31264146235  
CACCCCCC -0.325186379484  
CACCCCCG -0.201147191696  
CACCCCGA 0.000860565097115  
CACCCCGC -0.0720773258555  
CACCCCGG -0.373490820541  
CACCCCTA -0.0290731364132  
CACCCCTC -0.0964580635838  
CACCCCTG -0.104023473363

CACCCGAA -0.101353570235  
CACCCGAC -0.278746826125  
CACCCGAG -0.155610004218  
CACCCGCA -0.135881657196  
CACCCGCC -0.19022020697  
CACCCGCG -0.120386221726  
CACCCGGA 0.0261716030481  
CACCCGGC -0.302942854683  
CACCCGGG -0.288528295499  
CACCCGTA -0.0592256704662  
CACCCGTC -0.222997570602  
CACCCGTG -0.301769565401  
CACCCCTAA -0.098430633016  
CACCCCTAC -0.175918237498  
CACCCCTAG 0.101932804391  
CACCCCTCA -0.0982089691105  
CACCCCTCC -0.0860574558119  
CACCCCTCG -0.211200990326  
CACCCCTGA -0.122894077364  
CACCCCTGC -0.167078822365  
CACCCCTGG -0.207121188465  
CACCCCTTA -0.0552908280181  
CACCCCTTC -0.194373623615  
CACCGAAA 0.0192689211185  
CACCGAAC -0.0924965607744  
CACCGAAG -0.110072985858  
CACCGACA -0.153285343579  
CACCGACC -0.233131113441  
CACCGACG -0.272744849968  
CACCGAGA -0.000838667766399  
CACCGAGC -0.393802481925  
CACCGAGG -0.214274884704  
CACCGATA 0.308692990511  
CACCGATC 0.180704802085  
CACCGATG -0.231239527816  
CACCGCAA -0.154902447392  
CACCGCAC 0.105554363486  
CACCGCAG -0.00454077647935  
CACCGCCA -0.0937289736131  
CACCGCCC -0.178913906463  
CACCGCCG -0.300990291177  
CACCGCGA 0.0491485587907  
CACCGCGC -0.117530435262  
CACCGCGG -0.336248170475  
CACCGCTA -0.075218706983  
CACCGCTC -0.256616975966  
CACCGCTG -0.312829316481  
CACCGGAA 0.0259373882324  
CACCGGAC -0.191330078738  
CACCGGAG 0.010653051393  
CACCGGCA -0.236043918481  
CACCGGCC -0.131628278818  
CACCGGCG -0.25215160869  
CACCGGGA -0.0603406205282

CACCGGGC -0.29946331719  
CACCGGGG -0.285156346903  
CACCGGTA -0.0404798738132  
CACCGGTC -0.229592047701  
CACCGGTG -0.245184413523  
CACCGTAA 0.104557564433  
CACCGTAC -0.0968261011076  
CACCGTAG -0.086317087947  
CACCGTCA -0.0778296825617  
CACCGTCC -0.0775845585499  
CACCGTCG -0.202066189748  
CACCGTGA 0.0366302942061  
CACCGTGC -0.151907149164  
CACCGTGG -0.274098095148  
CACCGTTA 0.0684582164751  
CACCGTTC -0.126288069929  
CACCTAAA -0.0601840544484  
CACCTAAC -0.0479136853309  
CACCTAAG -0.212386513707  
CACCTACA 0.0657000211674  
CACCTACC 0.0110238461931  
CACCTACG -0.0768939883772  
CACCTAGA 0.0404275818778  
CACCTAGC -0.367719376572  
CACCTAGG -0.196373028256  
CACCTATA 0.159257053196  
CACCTATC 0.00640309731219  
CACCTATG -0.08968791616  
CACCTCAA -0.120319138085  
CACCTCAC 0.0449559498697  
CACCTCAG -0.0604372825885  
CACCTCCA -0.0684080939422  
CACCTCCC -0.10381812104  
CACCTCCG -0.24074958446  
CACCTCGA -0.00841514419392  
CACCTCGC -0.23325020472  
CACCTCGG -0.282182639113  
CACCTCTA -0.20853338978  
CACCTCTC -0.142435120165  
CACCTCTG -0.209509435003  
CACCTGAA -0.237504031758  
CACCTGAC -0.223069925154  
CACCTGAG 0.0182185041812  
CACCTGCA -0.133683801817  
CACCTGCC -0.225179138097  
CACCTGCG -0.122493435754  
CACCTGGA -0.190534673117  
CACCTGGC -0.303061630973  
CACCTGGG -0.326989140469  
CACCTGTA 0.0111377123129  
CACCTGTC -0.278739695218  
CACCTTAA -0.174715587761  
CACCTTAC -0.018376057771  
CACCTTAG -0.195943289901

CACCTTCA -0.0768673284843  
CACCTTCC -0.21607710482  
CACCTTCG -0.27229540324  
CACCTTGA -0.118295981932  
CACCTTGC -0.190514174951  
CACCTTGG -0.21034708958  
CACCTTTA 0.0131960614001  
CACCTTTC -0.186360139947  
CACGAAAA -0.0984737560491  
CACGAAAC 0.0672339005672  
CACGAAAG -0.195596446793  
CACGAACA -0.206956568698  
CACGAACC -0.0675407477238  
CACGAACG -0.137546579635  
CACGAAGA 0.191856713899  
CACGAAGC -0.203020878997  
CACGAAGG -0.15979958373  
CACGAATA 0.037618884258  
CACGAATC 0.344050662232  
CACGAATG -0.0339471703108  
CACGACAA -0.127390641081  
CACGACAC 0.00747574261111  
CACGACAG -0.34246971764  
CACGACCA -0.243772864992  
CACGACCC -0.218599455065  
CACGACCG 0.00338313759553  
CACGACGA -0.043080284492  
CACGACGC -0.268845753677  
CACGACGG -0.264244148383  
CACGACTA -0.0520365655645  
CACGACTC -0.0490257202412  
CACGACTG -0.160517413923  
CACGAGAA 0.0398617555991  
CACGAGAC 0.0510609256732  
CACGAGAG -0.073041807765  
CACGAGCA -0.203415743391  
CACGAGCC -0.265914195195  
CACGAGCG -0.140709218685  
CACGAGGA -0.0261636606498  
CACGAGGC -0.325822287272  
CACGAGGG -0.123211249517  
CACGAGTA -0.0155916293804  
CACGAGTC -0.102888383652  
CACGAGTG -0.169250653538  
CACGATAA 0.125862777378  
CACGATAC 0.225302365642  
CACGATAG 0.0320102479508  
CACGATCA 0.0811775963291  
CACGATCC 0.283201827697  
CACGATCG 0.290930466288  
CACGATGA -0.157000664054  
CACGATGC -0.046770508675  
CACGATGG -0.100448660222  
CACGATTA 0.226078990971



CACGATTC 0.371413034751  
CACGCAAA -0.0773436918266  
CACGCAAC 0.110227698755  
CACGCAAG -0.0921238740415  
CACGCACA -0.299255988069  
CACGCACC -0.0796730392278  
CACGCACG 0.0728984663172  
CACGCAGA 0.00399986763623  
CACGCAGC -0.153222048512  
CACGCAGG -0.274784871156  
CACGCATA -0.0118328728052  
CACGCATC -0.173159803557  
CACGCATG -0.223149871122  
CACGCCAA -0.129556564679  
CACGCCAC -0.0729619341098  
CACGCCAG -0.24398370321  
CACGCCCA -0.285730233943  
CACGCCCC -0.306472466824  
CACGCCCG -0.159962548402  
CACGCCGA 0.0807763686552  
CACGCCGC -0.208986372671  
CACGCCGG -0.23659923247  
CACGCCTA -0.11390384504  
CACGCCTC -0.151431579934  
CACGCCTG -0.295380558891  
CACGCGAA -0.00161914179607  
CACGCGAC -0.152676644255  
CACGCGAG -0.0334890476851  
CACGCGCA -0.0882367537224  
CACGCGCC -0.0895270442859  
CACGCGCG 0.243101223416  
CACGCGGA 0.0285241929009  
CACGCGGC -0.156521858341  
CACGCGGG -0.372447141104  
CACGCGTA 0.155712584063  
CACGCGTC 0.0217200671746  
CACGCGTG -0.0539982193997  
CACGCTAA -0.170361967013  
CACGCTAC -0.142884768347  
CACGCTAG -0.0941843476839  
CACGCTCA -0.211511489598  
CACGCTCC -0.1070998299  
CACGCTCG 0.0661000124085  
CACGCTGA 0.0280548040408  
CACGCTGC -0.0763465033612  
CACGCTGG -0.136962508994  
CACGCTTA -0.0820782257169  
CACGCTTC -0.145216336545  
CACGAAA 0.0757289986351  
CACGGAAC 0.0119940877517  
CACGGAAG -0.202290655131  
CACGGACA -0.0629782200495  
CACGGACC -0.28267053677  
CACGGACG 0.0778515798924

CACGGAGA 0.165797099334  
CACGGAGC -0.246738148375  
CACGGAGG -0.09240788984  
CACGGATA 0.240335376699  
CACGGATC 0.181041923466  
CACGGATG -0.0856708384688  
CACGGCAA 0.0477266921162  
CACGGCAC 0.0403392373089  
CACGGCAG -0.102392000199  
CACGGCCA -0.305673401091  
CACGGCCC -0.222350080777  
CACGGCCG -0.166359272952  
CACGGCGA -0.156020121266  
CACGGCGC -0.174116778723  
CACGGCGG -0.14756528123  
CACGGCTA -0.213844891787  
CACGGCTC -0.121895238332  
CACGGCTG -0.218415572248  
CACGGGAA 0.097299779118  
CACGGGAC -0.147473694947  
CACGGGAG 0.00331598816447  
CACGGGCA -0.288740314405  
CACGGGCC -0.194906844625  
CACGGGCG -0.240213227085  
CACGGGGA -0.169479848658  
CACGGGGC -0.231375321581  
CACGGGGG -0.301109955009  
CACGGGTA -0.245372782174  
CACGGGTC -0.275796126295  
CACGGTAA -0.0846589734045  
CACGGTAC -0.0550233429021  
CACGGTAG -0.159715157681  
CACGGTCA -0.198435540118  
CACGGTCC -0.123716222626  
CACGGTCG -0.22523703575  
CACGGTGA -0.0406302865058  
CACGGTGC -0.272045508601  
CACGGTGG -0.148716443254  
CACGGTTA -0.0104822522135  
CACGGTTC -0.0222938432141  
CACGTAAA 0.092311319584  
CACGTAAAC 0.0480828886959  
CACGTAAAG 0.117418596673  
CACGTACA 0.0312482208419  
CACGTACC -0.274244951385  
CACGTACG -0.0856094117524  
CACGTAGA 0.0954196379236  
CACGTAGC -0.263087421686  
CACGTAGG -0.0149091323088  
CACGTATA 0.254338360399  
CACGTATC 0.248782143457  
CACGTATG -0.0479259316559  
CACGTCAA -0.0411122384181  
CACGTCAC 0.236739494315

CACGTCAG -0.154356847079  
CACGTCCA 0.0112282212798  
CACGTCCC -0.187390078975  
CACGTCCG -0.1331797667  
CACGTCGA 0.0809309122996  
CACGTCGC -0.127992656362  
CACGTCGG -0.336029827477  
CACGTCTA -0.23650360446  
CACGTCTC -0.246004363785  
CACGTCTG -0.189804145364  
CACGTGAA 0.00278315073393  
CACGTGAC -0.131459342539  
CACGTGAG -0.0674503478026  
CACGTGCA -0.0044059543799  
CACGTGCC -0.0891879970778  
CACGTGCG -0.0621773041053  
CACGTGGA 0.0321575018545  
CACGTGGC -0.115037626913  
CACGTGGG -0.0590533702831  
CACGTGTA 0.0530200879624  
CACGTGTC -0.310712503756  
CACGTTAA -0.0644597929989  
CACGTTAC -0.188764271082  
CACGTTAG -0.157280801162  
CACGTTCA -0.172278497823  
CACGTTCC -0.0298278139895  
CACGTTCG -0.10551130301  
CACGTTGA -0.104790952337  
CACGTTGC -0.0732018033668  
CACGTTGG -0.345852662218  
CACGTTTA 0.0651096290522  
CACGTTTC -0.0734028036224  
CACTAAAA 0.0032663517512  
CACTAAAC -0.00179940929736  
CACTAAAG -0.00972087803614  
CACTAACA 0.0746779837689  
CACTAACC -0.183722048004  
CACTAACG -0.0141092689278  
CACTAAGA 0.137954930512  
CACTAAGC -0.0918117770333  
CACTAAGG -0.177275480345  
CACTAATA 0.0995609935004  
CACTAATC 0.0743217301811  
CACTAATG -0.0326869569294  
CACTACAA 0.0360597943111  
CACTACAC 0.186175180823  
CACTACAG -0.0974203740003  
CACTACCA -0.191889958614  
CACTACCC -0.304587436642  
CACTACCG -0.00114025871602  
CACTACGA -0.129808872233  
CACTACGC -0.263471947453  
CACTACGG -0.204049251604  
CACTACTA -0.0110896019987

CACTACTC -0.0521426538105  
CACTACTG -0.06810434808  
CACTAGAA 0.0606402779501  
CACTAGAC -0.0723409359773  
CACTAGAG -0.0381759188029  
CACTAGCA -0.212220209689  
CACTAGCC -0.257605610164  
CACTAGCG -0.206129650305  
CACTAGGA 0.146060305249  
CACTAGGC -0.223083171293  
CACTAGGG -0.240156802433  
CACTAGTA 0.0785260176784  
CACTAGTC -0.146105748952  
CACTAGTG 0.139342997087  
CACTATAA 0.0212329701963  
CACTATAC 0.145693370205  
CACTATAG -0.0120004671431  
CACTATCA 0.118358686751  
CACTATCC 0.0739756429867  
CACTATCG 0.101557480345  
CACTATGA -0.00181966818245  
CACTATGC 0.081198278168  
CACTATGG -0.212879240064  
CACTATTA 0.131393155818  
CACTATTC -0.158610708483  
CACTCAAA 0.0631334400897  
CACTCAAC 0.0775099815333  
CACTCAAG -0.0592282855355  
CACTCACA -0.185892131322  
CACTCACC -0.205357758205  
CACTCACG -0.118142918979  
CACTCAGA 0.132256909928  
CACTCAGC -0.286225660424  
CACTCAGG -0.38335091459  
CACTCATA -0.103284599607  
CACTCATC -0.112841491629  
CACTCATG -0.0605860895687  
CACTCCAA -0.0855783068258  
CACTCCAC -0.0833395369612  
CACTCCAG -0.142275044317  
CACTCCCA -0.0996187512498  
CACTCCCC -0.125643562514  
CACTCCCG -0.209643007765  
CACTCCGA 0.0185653973533  
CACTCCGC -0.27989222034  
CACTCCGG -0.392422000094  
CACTCCTA -0.24923714307  
CACTCCTC -0.139858950801  
CACTCCTG -0.0151128077487  
CACTCGAA -0.179253763032  
CACTCGAC -0.0673026821825  
CACTCGAG -0.284166246282  
CACTCGCA 0.128934719844  
CACTCGCC -0.252894186527

CACTCGCG 0.0467865667175  
CACTCGGA 0.0374787413414  
CACTCGGC -0.13422889813  
CACTCGGG -0.103574915465  
CACTCGTA 0.0575483748531  
CACTCGTC -0.174528939062  
CACTCTAA -0.0706094027138  
CACTCTAC -0.0231016140107  
CACTCTAG 0.0438961190631  
CACTCTCA -0.284859019525  
CACTCTCC -0.153701154928  
CACTCTCG -0.340894398989  
CACTCTGA 0.0516204910144  
CACTCTGC 0.0356013290869  
CACTCTGG -0.203080050967  
CACTCTTA -0.0163549526116  
CACTCTTC -0.0695974356261  
CACTGAAA 0.143823857872  
CACTGAAC -0.0153431668583  
CACTGAAG 0.0020379929027  
CACTGACA -0.169556035279  
CACTGACC -0.218207116143  
CACTGACG -0.0810467409216  
CACTGAGA 0.207346464922  
CACTGAGC -0.289409167125  
CACTGAGG -0.202551369688  
CACTGATA 0.336191279748  
CACTGATC 0.145904858026  
CACTGATG -0.0486303219638  
CACTGCAA 0.194070059222  
CACTGCAC -0.0799297311421  
CACTGCAG -0.170680769517  
CACTGCCA -0.309962265607  
CACTGCCC -0.359934839953  
CACTGCCG -0.0964105400975  
CACTGCGA 0.0786348859717  
CACTGCGC 0.0593906702773  
CACTGCGG -0.175763585184  
CACTGCTA -0.11157151246  
CACTGCTC -0.270430491166  
CACTGCTG -0.151067295916  
CACTGGAA -0.0844549783944  
CACTGGAC -0.108339963358  
CACTGGAG 0.0291052020759  
CACTGGCA -0.192300507988  
CACTGGCC -0.345620879369  
CACTGGCG -0.186372770349  
CACTGGGA -0.184108671381  
CACTGGGC -0.331609323709  
CACTGGGG -0.199552026906  
CACTGGTA -0.00321210065869  
CACTGGTC -0.31692222717  
CACTGTAA 0.115745221806  
CACTGTAC -0.0859802048409

CACTGTAG -0.0506349009389  
CACTGTCA -0.0529213248614  
CACTGTCC -0.00352125298148  
CACTGTCCG -0.0881360262184  
CACTGTGA -0.0745266866827  
CACTGTGC -0.207216233058  
CACTGTGG -0.257928823369  
CACTGTTA 0.11591206032  
CACTGTTC 0.031675836327  
CACTTAAA -0.234776764801  
CACTTAAC 0.00896350896351  
CACTTAAG 0.00471683805017  
CACTTACA 0.168824770261  
CACTTACC -0.124694060728  
CACTTACG 0.0973168470763  
CACTTAGA 0.00278461055597  
CACTTAGC -0.182686056034  
CACTTAGG -0.1877106183  
CACTTATA 0.127685536776  
CACTTATC -0.104324679013  
CACTTATG 0.0544477128238  
CACTTCAA 0.0267694867996  
CACTTCAC 0.203110150873  
CACTTCAG -0.124277313218  
CACTTCCA 0.0322126534248  
CACTTCCC -0.131164376952  
CACTTCCG -0.0464172317395  
CACTTCGA 0.155057261118  
CACTTCGC 0.0760738676752  
CACTTCGG -0.00953044823836  
CACTTCTA -0.194603087495  
CACTTCTC -0.0975179194075  
CACTTCTG -0.00758471970593  
CACTTGAA -0.0650153646271  
CACTTGAC -0.0680489035578  
CACTTGAG -0.0388413230205  
CACTTGCA -0.318186578909  
CACTTGCC -0.342426522675  
CACTTGCG -0.0643749534751  
CACTTGGA 0.0880849324467  
CACTTGGC -0.190909065844  
CACTTGGG -0.207980106251  
CACTTGTA 0.117377708287  
CACTTGTC -0.275005801641  
CACTTTAA -0.175293358615  
CACTTTAC 0.0385909325303  
CACTTTAG -0.00302256154975  
CACTTTCA 0.0140236655388  
CACTTTCC -0.0594651212017  
CACTTTCG -0.116234891267  
CACTTTGA -0.198403120882  
CACTTTGC -0.106065515153  
CACTTTGG -0.0836214836298  
CACTTTTA 0.103424742524

CACTTTTC -0.0543617550739  
CAGAAAAA 0.109471730684  
CAGAAAAC 0.0192973422339  
CAGAAAAG 0.047811361795  
CAGAAACA 0.0907284695163  
CAGAAACC -0.143435164524  
CAGAAACG -0.164626625817  
CAGAAAGA 0.127152690087  
CAGAAAGC -0.10106586823  
CAGAAAGG -0.251240417773  
CAGAAATA 0.148458375731  
CAGAAATC 0.431683749866  
CAGAAATG 0.0714778139021  
CAGAACAA 0.00754160290083  
CAGAACAC -0.206644728681  
CAGAACAG -0.156744997808  
CAGAACCA -0.208792827549  
CAGAACCC -0.296008189676  
CAGAACCG -0.129674866151  
CAGAACGA -0.177630436117  
CAGAACGC -0.272390635284  
CAGAACGG 0.0224600921148  
CAGAACTA 0.13645792648  
CAGAACTC -0.227262752986  
CAGAACTG 0.134732086159  
CAGAAGAA -0.0930714445244  
CAGAAGAC 0.0765447398344  
CAGAAGAG -0.0629970619615  
CAGAAGCA -0.174462559038  
CAGAAGCC -0.364596601346  
CAGAAGCG -0.127787612428  
CAGAAGGA -0.168299396775  
CAGAAGGC -0.363952804598  
CAGAAGGG -0.237335334541  
CAGAAGTA -0.0607243799203  
CAGAAGTC -0.0152327303108  
CAGAATAA 0.12912928914  
CAGAATAC 0.025435209448  
CAGAATAG 0.00515536156143  
CAGAATCA 0.378717984278  
CAGAATCC 0.464184725882  
CAGAATCG 0.314363189127  
CAGAATGA -0.0717549563766  
CAGAATGC -0.164949847014  
CAGAATGG -0.0037032441301  
CAGAATTA 0.11872782093  
CAGAATTC 0.242864024875  
CAGACAAA 0.102484617125  
CAGACAAC -0.00238668420487  
CAGACAAG 0.0801872951687  
CAGACACA -0.143899601018  
CAGACACC -0.0562117940955  
CAGACACG -0.259195863274  
CAGACAGA -0.117793770939

CAGACAGC -0.259531124932  
CAGACAGG -0.178763741036  
CAGACATA -0.112690968345  
CAGACATC -0.0155332364985  
CAGACATG -0.119086815969  
CAGACCAA -0.0922137556157  
CAGACCAC -0.34325468188  
CAGACCAG -0.165808086415  
CAGACCCA -0.260759211016  
CAGACCCC -0.156906851029  
CAGACCCG -0.172804645399  
CAGACCGA -0.102828433197  
CAGACCGC -0.262735644301  
CAGACCGG -0.0798215080599  
CAGACCTA -0.162276662234  
CAGACCTC -0.098523098661  
CAGACCTG -0.0597454070349  
CAGACGAA -0.148585094212  
CAGACGAC -0.355252096787  
CAGACGAG -0.0719970380779  
CAGACGCA 0.0998058436677  
CAGACGCC -0.1467116853  
CAGACGCG 0.0138734188302  
CAGACGGA -0.012978547915  
CAGACGGC -0.351228925156  
CAGACGGG -0.191786829098  
CAGACGTA -0.07474872813  
CAGACGTC -0.0377774468684  
CAGACTAA -0.180094976934  
CAGACTAC -0.133650699115  
CAGACTAG -0.0850690972471  
CAGACTCA -0.164685641496  
CAGACTCC -0.311742865884  
CAGACTCG -0.298539881831  
CAGACTGA -0.0152523761074  
CAGACTGC -0.283353009764  
CAGACTGG -0.099287058298  
CAGACTTA -0.105719307004  
CAGACTTC -0.260660012514  
CAGAGAAA 0.120212696072  
CAGAGAAC -0.0304379177414  
CAGAGAAG 0.104712150167  
CAGAGACA -0.0238049937268  
CAGAGACC -0.246607457392  
CAGAGACG -0.185769536694  
CAGAGAGA -0.0850006479023  
CAGAGAGC -0.235861981514  
CAGAGAGG -0.13099461632  
CAGAGATA 0.116277434459  
CAGAGATC 0.354471176514  
CAGAGATG 0.204094070933  
CAGAGCAA -0.121667140991  
CAGAGCAC -0.349460498574  
CAGAGCAG -0.174937907118



CAGAGCCA -0.235003401862  
CAGAGCCC -0.361500973948  
CAGAGCCG -0.364757904716  
CAGAGCGA -0.00665459880441  
CAGAGCGC -0.225041965386  
CAGAGCGG -0.135132117603  
CAGAGCTA -0.0648165313722  
CAGAGCTC -0.16059362177  
CAGAGCTG -0.0886746787456  
CAGAGGAA -0.21183181928  
CAGAGGAC -0.140636693603  
CAGAGGAG -0.116678659157  
CAGAGGCA -0.173819479411  
CAGAGGCC -0.319710763277  
CAGAGGCG -0.156518167509  
CAGAGGGA -0.0653951122689  
CAGAGGGC -0.3188985424  
CAGAGGGG -0.24652642514  
CAGAGGTA -0.134135483428  
CAGAGGTC -0.192527632595  
CAGAGTAA -0.0416697689425  
CAGAGTAC -0.276478700162  
CAGAGTAG -0.0382413517778  
CAGAGTCA -0.00151579949118  
CAGAGTCC -0.0238045199472  
CAGAGTCG -0.0682489268256  
CAGAGTGA -0.011508753933  
CAGAGTGC -0.296005083749  
CAGAGTGG -0.108385515326  
CAGAGTTA -0.00262383595717  
CAGAGTTC -0.0638584358584  
CAGATAAA -0.0423164211043  
CAGATAAC 0.18252666  
CAGATAAG 0.17366264336  
CAGATACA 0.205988919951  
CAGATACC 0.364440197774  
CAGATACG 0.376683846381  
CAGATAGA 0.101471500624  
CAGATAGC 0.0618511073057  
CAGATAGG -0.240314404558  
CAGATATA 0.192951905073  
CAGATATC 0.47135537178  
CAGATATG 0.428150478457  
CAGATCAA 0.0185189780921  
CAGATCAC 0.197665014635  
CAGATCAG 0.127782465196  
CAGATCCA 0.27539761903  
CAGATCCC 0.283166086196  
CAGATCCG 0.255158646161  
CAGATCGA 0.19427554276  
CAGATCGC 0.420223253557  
CAGATCGG 0.155291655292  
CAGATCTA 0.2626938233  
CAGATCTC 0.44419212601

CAGATCTG 0.413948354129  
CAGATGAA -0.0397445759614  
CAGATGAC -0.101488540882  
CAGATGAG -0.142972943911  
CAGATGCA -0.191905250573  
CAGATGCC -0.0818987443857  
CAGATGCG -0.00142989569571  
CAGATGGA -0.0504413333859  
CAGATGGC -0.102969275256  
CAGATGGG -0.189731312179  
CAGATGTA -0.157795675775  
CAGATGTC -0.176801643435  
CAGATTAA -0.143142021998  
CAGATTAC 0.476464067373  
CAGATTAG 0.116426343699  
CAGATTCA 0.282407752105  
CAGATTCC 0.461942658912  
CAGATTCG 0.4292791414  
CAGATTGA 0.0789122455789  
CAGATTGC 0.478677839171  
CAGATTGG 0.040441267714  
CAGATTTA 0.283226752924  
CAGATTTT 0.485633463918  
CAGCAAAA 0.171496244608  
CAGCAAAC -0.0492379431773  
CAGCAAAG 0.0773100924616  
CAGCAACA -0.119924885014  
CAGCAACC -0.137615127426  
CAGCAACG -0.201476243642  
CAGCAAGA 0.00176857441078  
CAGCAAGC -0.318976852656  
CAGCAAGG 0.0416925176821  
CAGCAATA 0.137412319438  
CAGCAATC 0.330064893168  
CAGCAATG -0.158205271539  
CAGCACAA -0.124038131215  
CAGCACAC -0.307776812913  
CAGCACAG -0.15490565845  
CAGCACCA -0.293522976185  
CAGCACCC -0.272443981355  
CAGCACCG -0.239307764484  
CAGCACGA -0.0173105318014  
CAGCACGC -0.137767978479  
CAGCACGG -0.202808577963  
CAGCACTA -0.212499397853  
CAGCACTC 0.0337458670792  
CAGCACTG -0.123887082854  
CAGCAGAA -0.109258397054  
CAGCAGAC -0.253616715055  
CAGCAGAG -0.0301065365478  
CAGCAGCA -0.0576593791101  
CAGCAGCC -0.181473773664  
CAGCAGCG -0.164872414986  
CAGCAGGA -0.164575942144

CAGCAGGC -0.27267577915  
CAGCAGGG -0.223452202507  
CAGCAGTA -0.101591516325  
CAGCAGTC -0.333447391806  
CAGCATAA -0.0619635318869  
CAGCATAC 0.0596125632285  
CAGCATAG 0.0616939845245  
CAGCATCA 0.239786719999  
CAGCATCC -0.0930935818924  
CAGCATCG 0.0129316644468  
CAGCATGA -0.140488656195  
CAGCATGC -0.221763640318  
CAGCATGG 0.160646872768  
CAGCATTAA 0.013421437986  
CAGCATTC -0.341563296616  
CAGCCAAA 0.0372397190579  
CAGCCAAC -0.316631518009  
CAGCCAAG -0.0216849266074  
CAGCCACA -0.0769257155702  
CAGCCACC -0.129727054399  
CAGCCACG -0.230517049907  
CAGCCAGA -0.104507693877  
CAGCCAGC -0.290976235954  
CAGCCAGG -0.11001151571  
CAGCCATA -0.00301112627704  
CAGCCATC -0.396227663252  
CAGCCATG -0.320293054832  
CAGCCCAA -0.21595016731  
CAGCCCAC -0.410354557777  
CAGCCCAG -0.38637773202  
CAGCCCCA -0.251340340316  
CAGCCCCC -0.368473272975  
CAGCCCCG -0.181618471936  
CAGCCCGA -0.116412618857  
CAGCCCGC -0.176180236805  
CAGCCCGG -0.0507941628137  
CAGCCCTA -0.0596758923733  
CAGCCCTC -0.242099186895  
CAGCCCTG -0.0564832504887  
CAGCCGAA -0.157905765514  
CAGCCGAC -0.275013333829  
CAGCCGAG -0.0703915860522  
CAGCCGCA -0.0386976927513  
CAGCCGCC -0.0289399882701  
CAGCCGCG -0.19773633936  
CAGCCGGA -0.209087651105  
CAGCCGGC -0.360995726514  
CAGCCGGG -0.254759630888  
CAGCCGTA -0.181806438052  
CAGCCGTC -0.2129434369  
CAGCCTAA -0.146928925157  
CAGCCTAC -0.140602697723  
CAGCCTAG -0.231183062482  
CAGCCTCA -0.309545259293

CAGCCTCC -0.291134373527  
CAGCCTCG -0.185904168079  
CAGCCTGA -0.0622778646329  
CAGCCTGC -0.265629953057  
CAGCCTGG -0.181198977693  
CAGCCTTA -0.201308178781  
CAGCCTTC -0.318817093169  
CAGCGAAA -0.0175974638311  
CAGCGAAC -0.203417569861  
CAGCGAAG 0.0246060305249  
CAGCGACA -0.17198934534  
CAGCGACC -0.156958196502  
CAGCGACG -0.0565677103327  
CAGCGAGA 0.019496653358  
CAGCGAGC -0.2578984075  
CAGCGAGG -0.058385507558  
CAGCGATA 0.0841988861558  
CAGCGATC 0.163327239085  
CAGCGATG -0.208283402689  
CAGCGCAA 0.215784325891  
CAGCGCAC -0.192316673599  
CAGCGCAG -0.238554957074  
CAGCGCCA -0.241656812237  
CAGCGCCC -0.363759271663  
CAGCGCCG -0.257439848692  
CAGCGCGA 0.0333046545168  
CAGCGCGC -0.0222133821887  
CAGCGCGG 0.0968061725637  
CAGCGCTA -0.0918715303577  
CAGCGCTC 0.0413655132595  
CAGCGCTG 0.0440862748989  
CAGCGGAA -0.222537515341  
CAGCGGAC 0.0144369101407  
CAGCGGAG -0.153279852238  
CAGCGGCA -0.403252444111  
CAGCGGCC -0.358713810697  
CAGCGGCG -0.299414029662  
CAGCGGGA -0.0717271481472  
CAGCGGGC -0.266292393939  
CAGCGGGG -0.141700880536  
CAGCGGTA -0.0313054100933  
CAGCGGTC -0.285165843856  
CAGCGTAA 0.0305771314655  
CAGCGTAC -0.260995874466  
CAGCGTAG -0.255951937946  
CAGCGTCA 0.070289297562  
CAGCGTCC -0.125973373891  
CAGCGTCG -0.131373035627  
CAGCGTGA -0.113960461222  
CAGCGTGC -0.190102293119  
CAGCGTGG 0.00417293139777  
CAGCGTTA 0.0469471471428  
CAGCGTTC -0.1833442555  
CAGCTAAA -0.0581251432166

CAGCTAAC -0.0190017736838  
CAGCTAAG -0.107158907003  
CAGCTACA -0.0113796459421  
CAGCTACC -0.15246639062  
CAGCTACG -0.103820651159  
CAGCTAGA -0.101296365215  
CAGCTAGC -0.215144572101  
CAGCTAGG -0.0325122894662  
CAGCTATA -0.0238234819723  
CAGCTATC -0.0111537703554  
CAGCTATG 0.0887798077414  
CAGCTCAA -0.224169740351  
CAGCTCAC -0.269962335079  
CAGCTCAG -0.19670016127  
CAGCTCCA -0.220381920181  
CAGCTCCC -0.162558365943  
CAGCTCCG -0.434074991502  
CAGCTCGA -0.084474281444  
CAGCTCGC -0.226637169361  
CAGCTCGG 0.0410638209869  
CAGCTCTA -0.0865769362715  
CAGCTCTC -0.185105308408  
CAGCTGAA -0.289586978762  
CAGCTGAC -0.181403322352  
CAGCTGAG -0.106726053117  
CAGCTGCA -0.226599816993  
CAGCTGCC -0.0886900872136  
CAGCTGCG -0.304590001241  
CAGCTGGA -0.165679389358  
CAGCTGGC -0.185260540296  
CAGCTGGG -0.0860312910058  
CAGCTGTA -0.187728348244  
CAGCTGTC -0.346644336931  
CAGCTTAA -0.20012707642  
CAGCTTAC -0.233456110371  
CAGCTTAG -0.334337485645  
CAGCTTCA -0.0779095379684  
CAGCTTCC -0.219417940987  
CAGCTTCG -0.128473859209  
CAGCTTGA -0.324578659269  
CAGCTTGC -0.368891810182  
CAGCTTGG -0.0823730066154  
CAGCTTTA 0.0525090691445  
CAGCTTTC 0.0526931890568  
CAGGAAAA 0.074464271434  
CAGGAAAC 0.0235899943797  
CAGGAAAG -0.136309253057  
CAGGAACA -0.288165240045  
CAGGAACC -0.248578272867  
CAGGAACG -0.188461294582  
CAGGAAGA -0.0288125077553  
CAGGAAGC -0.163887579299  
CAGGAAGG -0.0394009565949  
CAGGAATA 0.0945587460739

CAGGAATC 0.369442274987  
CAGGAATG 0.0348754249696  
CAGGACAA 0.0499047466114  
CAGGACAC -0.165293869551  
CAGGACAG -0.121717735599  
CAGGACCA -0.165471369046  
CAGGACCC -0.31436095883  
CAGGACCG -0.336642482088  
CAGGACGA 0.0257096559929  
CAGGACGC -0.159100118253  
CAGGACGG -0.250918273981  
CAGGACTA -0.154122609222  
CAGGACTC -0.186201536811  
CAGGACTG 0.0775444866354  
CAGGAGAA -0.0702433135839  
CAGGAGAC -0.362991535678  
CAGGAGAG -0.0394382870397  
CAGGAGCA -0.162693425468  
CAGGAGCC -0.326085497569  
CAGGAGCG -0.114903867906  
CAGGAGGA 0.0426010019548  
CAGGAGGC -0.169406423348  
CAGGAGGG -0.139410024876  
CAGGAGTA -0.0932290974806  
CAGGAGTC -0.284128716774  
CAGGATAA 0.181028135574  
CAGGATAC 0.297381403442  
CAGGATAG -0.0114282169004  
CAGGATCA 0.26797588374  
CAGGATCC 0.282857309694  
CAGGATCG 0.271558287045  
CAGGATGA 0.0291635949578  
CAGGATGC -0.244799321609  
CAGGATGG -0.207830372429  
CAGGATTA 0.296617592315  
CAGGATTC 0.405881087699  
CAGGCAAA 0.107398378138  
CAGGCAAC -0.206542127012  
CAGGCAAG 0.0847581705834  
CAGGCACA -0.155480112712  
CAGGCACC -0.217118592209  
CAGGCACG -0.195659364741  
CAGGCAGA -0.192508607548  
CAGGCAGC -0.192307268191  
CAGGCAGG -0.265549282745  
CAGGCATA 0.0783741961855  
CAGGCATC -0.127350277662  
CAGGCATG -0.196518988727  
CAGGCCAA -0.0918504917165  
CAGGCCAC -0.242314500911  
CAGGCCAG -0.226992168633  
CAGGCCCA -0.298157197706  
CAGGCCCC -0.332651691459  
CAGGCCCG -0.269609180843

CAGGCCGA -0.118206330695  
CAGGCCGC -0.318160055568  
CAGGCCGG -0.242453810512  
CAGGCCTA -0.249434206744  
CAGGCCTC -0.167963656713  
CAGGCCTG 0.205682760978  
CAGGCGAA -0.0402380379022  
CAGGCGAC -0.24788646594  
CAGGCGAG -0.165523366382  
CAGGCGCA -0.13920508034  
CAGGCGCC -0.185029428386  
CAGGCGCG -0.189642289545  
CAGGCGGA 0.0309071577014  
CAGGCGGC -0.147648302622  
CAGGCGGG -0.368334692794  
CAGGCGTA -0.0901081528475  
CAGGCGTC -0.238020847774  
CAGGCTAA -0.134239751529  
CAGGCTAC -0.204754742404  
CAGGCTAG -0.311882061417  
CAGGCTCA -0.227871399509  
CAGGCTCC -0.359160596715  
CAGGCTCG -0.3459171121  
CAGGCTGA -0.121965003984  
CAGGCTGC -0.24630373254  
CAGGCTGG -0.205926292545  
CAGGCTTA -0.123440399478  
CAGGCTTC -0.190821404122  
CAGGAAA 0.0803719879892  
CAGGGAAC -0.216348238097  
CAGGGAAG -0.0958440512918  
CAGGGACA -0.218263795954  
CAGGGACC -0.261749989662  
CAGGGACG -0.131410494976  
CAGGGAGA -0.133040028889  
CAGGGAGC -0.239723505673  
CAGGGAGG -0.305313478915  
CAGGGATA 0.0804650470258  
CAGGGATC 0.0866951818573  
CAGGGATG -0.214384504701  
CAGGGCAA -0.00268726026302  
CAGGGCAC -0.285218561612  
CAGGGCAG -0.36707013584  
CAGGGCCA -0.158927680317  
CAGGGCCC -0.292692696637  
CAGGGCCG -0.327848184982  
CAGGGCGA 0.0237335009775  
CAGGGCGC -0.204276303998  
CAGGGCGG -0.0287600676091  
CAGGGCTA -0.163215206274  
CAGGGCTC -0.394385059894  
CAGGGGAA -0.0535324043999  
CAGGGGAC -0.164656591475  
CAGGGGAG -0.232720291305

CAGGGGCA -0.326968675993  
CAGGGGCC -0.350175319303  
CAGGGGCG -0.284003864266  
CAGGGGGA -0.0101023888903  
CAGGGGGC -0.288943568826  
CAGGGGGG -0.263855143903  
CAGGGGTA -0.254014808414  
CAGGGGTC -0.108494510514  
CAGGGTAA 0.00683965672529  
CAGGGTAC -0.197071075492  
CAGGGTAG -0.131535319365  
CAGGGTCA -0.285017080435  
CAGGGTCC -0.347201530378  
CAGGGTCG -0.329549052191  
CAGGGTGA -0.115532449341  
CAGGGTGC -0.251359500795  
CAGGGTGG -0.241259639165  
CAGGGTTA 0.0362082951789  
CAGGGTTC -0.310255340198  
CAGGTAAA 0.0422932344547  
CAGGTAAC -0.0161755581995  
CAGGTAAG 0.0145303387517  
CAGGTACA -0.115064142329  
CAGGTACC -0.16034428658  
CAGGTACG -0.0168308804672  
CAGGTAGA -0.0423136635258  
CAGGTAGC -0.073866597186  
CAGGTAGG -0.129548224202  
CAGGTATA 0.0022295022295  
CAGGTATC 0.189311901433  
CAGGTATG 0.0832441625366  
CAGGTCAA 0.0262673141461  
CAGGTCAC -0.26016157536  
CAGGTCAG -0.2312529457  
CAGGTCCA -0.202084649953  
CAGGTCCC -0.488356369206  
CAGGTCCG -0.261812842648  
CAGGTCGA -0.319187518699  
CAGGTCGC -0.0402956576829  
CAGGTCGG -0.260361717062  
CAGGTCTA -0.241526122469  
CAGGTCTC -0.405606277934  
CAGGTGAA -0.121866823274  
CAGGTGAC -0.024054720227  
CAGGTGAG -0.0467512695542  
CAGGTGCA -0.351544020977  
CAGGTGCC -0.381115687588  
CAGGTGCG -0.154835597424  
CAGGTGGA -0.128962567309  
CAGGTGGC -0.33571665142  
CAGGTGGG -0.236990655542  
CAGGTGTA -0.203582130071  
CAGGTGTC -0.26355734444  
CAGGTTAA -0.0452256664378



CAGGTTAC -0.00140774383199  
CAGGTTAG -0.275311019325  
CAGGTTCA 0.0680853703933  
CAGGTTCC -0.160621575942  
CAGGTTCG -0.00139631978862  
CAGGTTGA -0.180996379659  
CAGGTTGC -0.153702371205  
CAGGTTGG 0.0391700240185  
CAGGTTTA -0.10823814211  
CAGGTTTC -0.271823673595  
CAGTAAAA 0.162059954891  
CAGTAAAC -0.153559012701  
CAGTAAAG 0.0725670240798  
CAGTAACA -0.0214338372152  
CAGTAACC -0.0862458528981  
CAGTAACG -0.136315671937  
CAGTAAGA 0.120711955213  
CAGTAAGC -0.110295029809  
CAGTAAGG -0.26839211211  
CAGTAATA 0.0823847700365  
CAGTAATC 0.323758472899  
CAGTAATG -0.0931716840808  
CAGTACAA 0.0405735640825  
CAGTACAC -0.121839981433  
CAGTACAG -0.0950953062401  
CAGTACCA -0.0179812769712  
CAGTACCC -0.113902257099  
CAGTACCG -0.189628348548  
CAGTACGA 0.0869637891141  
CAGTACGC -0.133585313473  
CAGTACGG -0.231172081511  
CAGTACTA 0.0810865455501  
CAGTACTC -0.156039325638  
CAGTACTG 0.06212015975  
CAGTAGAA -0.0386973940712  
CAGTAGAC -0.137515966804  
CAGTAGAG -0.124239289311  
CAGTAGCA -0.0805719890875  
CAGTAGCC -0.236415656892  
CAGTAGCG -0.00619114364054  
CAGTAGGA 0.0934998359241  
CAGTAGGC -0.242716555253  
CAGTAGGG -0.159786329084  
CAGTAGTA 0.154112683664  
CAGTAGTC -0.104801354715  
CAGTATAA 0.094887703189  
CAGTATAC 0.0777733656522  
CAGTATAG -0.0806468092311  
CAGTATCA 0.166294393567  
CAGTATCC 0.243436275118  
CAGTATCG 0.151590984924  
CAGTATGA 0.143689554243  
CAGTATGC -0.164607344365  
CAGTATGG -0.144658995196

CAGTATTA 0.169315270469  
CAGTATTC 0.13490434516  
CAGTCAAA 0.0808967686839  
CAGTCAAC -0.078909950877  
CAGTCAAG 0.0856382706948  
CAGTCACA -0.211006516488  
CAGTCACC -0.280517305545  
CAGTCACG -0.145889796186  
CAGTCAGA 0.11817186485  
CAGTCAGC -0.274923297029  
CAGTCAGG -0.0489047685087  
CAGTCATA -0.145682211338  
CAGTCATC -0.25498540152  
CAGTCATG -0.0219878396823  
CAGTCCAA -0.105403409099  
CAGTCCAC -0.282732471353  
CAGTCCAG -0.26455119496  
CAGTCCCA -0.204863573149  
CAGTCCCC -0.181843242006  
CAGTCCCG -0.2898332188  
CAGTCCGA -0.0422474816414  
CAGTCCGC -0.0645140388173  
CAGTCCGG -0.271935047114  
CAGTCCTA -0.296612098564  
CAGTCCTC -0.286041068043  
CAGTCGAA -0.0450741954556  
CAGTCGAC -0.254073228501  
CAGTCGAG -0.145163958152  
CAGTCGCA 0.052378005077  
CAGTCGCC -0.135457001449  
CAGTCGCG 0.00975472072653  
CAGTCGGA -0.0707699831391  
CAGTCGGC -0.261695008807  
CAGTCGGG -0.161384554318  
CAGTCGTA 0.00252706983977  
CAGTCGTC -0.268792775541  
CAGTCTAA -0.0974679426207  
CAGTCTAC -0.122700638348  
CAGTCTAG -0.08130655056  
CAGTCTCA -0.0977017702383  
CAGTCTCC -0.275033199144  
CAGTCTCG 0.0703996007026  
CAGTCTGA 0.206820606993  
CAGTCTGC -0.299763781047  
CAGTCTGG -0.198064096307  
CAGTCTTA -0.0993472647738  
CAGTCTTC -0.146708553164  
CAGTGAAA -0.0308131243167  
CAGTGAAC 0.0883039057539  
CAGTGAAG -0.230145735306  
CAGTGACA -0.104883700577  
CAGTGACC -0.0423921824895  
CAGTGACG -0.35124635025  
CAGTGAGA 0.150289407865

CAGTGAGC -0.307049312811  
CAGTGAGG -0.150300929947  
CAGTGATA 0.0390183572002  
CAGTGATC 0.0982175572798  
CAGTGATG 0.0386132962752  
CAGTGCAA 0.108594820716  
CAGTGCAC 0.00583917294166  
CAGTGCAG -0.120913735253  
CAGTGCCA -0.248619328669  
CAGTGCCC -0.222998658889  
CAGTGCCG -0.14427257641  
CAGTGCGA 0.195444587991  
CAGTGCGC 0.112802639358  
CAGTGCGG 0.0215689808991  
CAGTGCTA -0.191470931225  
CAGTGCTC -0.176256756145  
CAGTGGAA -0.239459894537  
CAGTGGAC -0.00281962403175  
CAGTGGAG -0.156706833874  
CAGTGGCA -0.192574766445  
CAGTGGCC -0.208605921258  
CAGTGGCG -0.136959943544  
CAGTGGGA 0.0556506061911  
CAGTGGGC -0.336944988742  
CAGTGGGG -0.15710279051  
CAGTGGTA -0.149261014482  
CAGTGGTC -0.144637699772  
CAGTGTA 0.0488854629377  
CAGTGTAC -0.191794116755  
CAGTGTAG 0.0367090529291  
CAGTGTCA -0.0620649060266  
CAGTGTCC -0.0914461840447  
CAGTGTCCG -0.349014192432  
CAGTGTGA -0.00706007891406  
CAGTGTGC -0.237007929534  
CAGTGTGG 0.00930360811239  
CAGTGTTA 0.0373693252481  
CAGTGTTTC -0.0364729239506  
CAGTTAAA -0.0844134799968  
CAGTTAAC 0.0375663306643  
CAGTTAAG -0.0549924166009  
CAGTTACA 0.161259972409  
CAGTTACC -0.0538214491653  
CAGTTACG -0.00588089311913  
CAGTTAGA 0.125505620766  
CAGTTAGC -0.172286008336  
CAGTTAGG -0.0864124287601  
CAGTTATA 0.0285709072064  
CAGTTATC -0.0590587112909  
CAGTTATG 0.147115434994  
CAGTTCAA -0.0859748395634  
CAGTTCAC -0.110481906466  
CAGTTCAG -0.187535505845  
CAGTTCCA -0.0489242375363

CAGTTCCC -0.223562072854  
CAGTTCCG -0.274120631062  
CAGTTCGA 0.0250925856986  
CAGTTCGC -0.202018971001  
CAGTTCGG -0.218064464342  
CAGTTCTA -0.0662963465741  
CAGTTCTC -0.187399585867  
CAGTTGAA -0.102284289153  
CAGTTGAC 0.0992817675525  
CAGTTGAG -0.137579161382  
CAGTTGCA -0.0817525461682  
CAGTTGCC -0.282891055485  
CAGTTGCG -0.106043355331  
CAGTTGGA -0.00739421764487  
CAGTTGGC -0.308537153047  
CAGTTGGG -0.102618712667  
CAGTTGTA -0.15427346716  
CAGTTGTC -0.279633075577  
CAGTTTAA -0.10175530032  
CAGTTTAC -0.197363523452  
CAGTTTAG -0.0344380474973  
CAGTTTCA -0.0312175645789  
CAGTTTCC -0.147752101362  
CAGTTTCG 0.0191560345852  
CAGTTTGA -0.185111147116  
CAGTTTGC -0.281361238206  
CAGTTTGG -0.0551091965684  
CAGTTTTA -0.161603800433  
CAGTTTTC 0.00010754022418  
CATAAAAA 0.0995766516062  
CATAAAAC 0.177826033007  
CATAAAAG 0.0320336051035  
CATAAACA -0.0419939709349  
CATAAACC -0.0878834944654  
CATAAACG -0.248986820272  
CATAAAGA 0.151394495011  
CATAAAGC -0.248487055146  
CATAAAGG -0.00147806982329  
CATAAATA 0.149613801129  
CATAAATC 0.17789552638  
CATAAATG -0.0826885209529  
CATAACAA -0.117781362452  
CATAACAC 0.112138309108  
CATAACAG -0.00031298516147  
CATAACCA -0.199534570212  
CATAACCC -0.238285482684  
CATAACCG -0.159091804757  
CATAACGA 0.0154821427268  
CATAACGC -0.0115736246604  
CATAACGG -0.194485110653  
CATAACTA 0.0901680025808  
CATAACTC 0.0172059111453  
CATAAGAA 0.0133866649018  
CATAAGAC 0.0469383882105

CATAAGAG 0.127470445652  
CATAAGCA -0.108374214435  
CATAAGCC -0.169397667023  
CATAAGCG -0.150520662303  
CATAAGGA 0.0988771140286  
CATAAGGC -0.261317415154  
CATAAGGG -0.251338556708  
CATAAGTA 0.137076560367  
CATAAGTC -0.111186936993  
CATAATAA -0.0747041807648  
CATAATAC 0.225789150032  
CATAATAG 0.0821895708719  
CATAATCA 0.264684794988  
CATAATCC 0.338179777574  
CATAATCG 0.14266767881  
CATAATGA 0.00325330588391  
CATAATGC -0.215099369058  
CATAATGG -0.101358392259  
CATAATTA 0.0936994080422  
CATAATTC 0.0139843653059  
CATACAAA 0.126487011233  
CATACAAC 0.100934267601  
CATACAAG 0.146434019693  
CATACACA 0.0492489734914  
CATACACC 0.00250724436691  
CATACACG -0.118474775796  
CATACAGA 0.0493896099957  
CATACAGC -0.178233216717  
CATACAGG -0.0501589349566  
CATACATA 0.00822098786158  
CATACATC 0.0603716706933  
CATACATG 0.0229243155259  
CATACCAA -0.222487640184  
CATACCAC -0.0965138692411  
CATACCAG -0.146257233039  
CATACCCA -0.0229666503653  
CATACCCC -0.188135981055  
CATACCCG -0.259389333921  
CATACCGA 0.282859994981  
CATACCGC -0.0355202104166  
CATACCGG -0.290295672126  
CATACCTA -0.105457775001  
CATACCTC -0.0772515930308  
CATACGAA 0.0485916366795  
CATACGAC 0.00805456814814  
CATACGAG -0.0113026722043  
CATACGCA -0.0759300155221  
CATACGCC -0.130215527818  
CATACGCG -0.058797824151  
CATACGGA 0.0900717020518  
CATACGGC -0.279236746794  
CATACGGG -0.183387354992  
CATACGTA -0.0371045977107  
CATACGTC -0.23988963746

CATACTAA -0.0130486193733  
CATACTAC 0.0205343084131  
CATACTAG 0.115336584244  
CATACTCA 0.0551776238477  
CATACTCC -0.121305372875  
CATACTCG 0.00265141174232  
CATACTGA 0.0856178331861  
CATACTGC -0.082567086442  
CATACTGG -0.101192205127  
CATACTTA 0.0799070093356  
CATACTTC -0.0462999727027  
CATAGAAA 0.0432333598534  
CATAGAAC -0.0594933776752  
CATAGAAG -0.00217297186994  
CATAGACA 0.243754774058  
CATAGACC -0.173548567175  
CATAGACG -0.0599345902376  
CATAGAGA 0.13855390028  
CATAGAGC -0.204978353636  
CATAGAGG -0.126386166861  
CATAGATA 0.276047674223  
CATAGATC 0.161978204857  
CATAGATG 0.124117230178  
CATAGCAA 0.0926278631164  
CATAGCAC 0.0520828011065  
CATAGCAG 0.0706353736657  
CATAGCCA -0.291087078672  
CATAGCCC -0.125247622315  
CATAGCCG -0.252468066539  
CATAGCGA 0.170369261987  
CATAGCGC -0.0319203501022  
CATAGCGG -0.0464286040792  
CATAGCTA -0.2355662799  
CATAGCTC -0.0507587425093  
CATAGGAA 0.192430092772  
CATAGGAC -0.145529309603  
CATAGGAG 0.107450931731  
CATAGGCA -0.179376334398  
CATAGGCC -0.260154504609  
CATAGGCG -0.259093913655  
CATAGGGA 0.0110372080069  
CATAGGGC -0.112883706185  
CATAGGGG -0.283266527656  
CATAGGTA -0.067484523773  
CATAGGTC -0.175458836895  
CATAGTAA 0.07046026743  
CATAGTAC -0.232825441304  
CATAGTAG 0.0438727619103  
CATAGTCA -0.0262612601434  
CATAGTCC -0.0252648219267  
CATAGTCG -0.198139918168  
CATAGTGA 0.0639044400488  
CATAGTGC -0.16239425414  
CATAGTGG -0.0888366811029

CATAGTTA -0.102098836549  
CATAGTTC 0.00950132764226  
CATATAAA 0.0545367619687  
CATATAAC 0.145073465545  
CATATAAG 0.188149582089  
CATATACA 0.143400509478  
CATATACC -0.0201141580841  
CATATACG 0.0396555574857  
CATATAGA 0.131181798939  
CATATAGC -0.261570651436  
CATATAGG -0.0359718793838  
CATATATA 0.0913359561469  
CATATATC 0.191422815559  
CATATATG 0.360346913856  
CATATCAA 0.147617314284  
CATATCAC 0.281391648358  
CATATCAG 0.235416012788  
CATATCCA 0.364382288625  
CATATCCC 0.273051288203  
CATATCCG 0.342663600239  
CATATCGA 0.211662075298  
CATATCGC 0.325634299942  
CATATCGG 0.189031627045  
CATATCTA 0.374181080477  
CATATCTC 0.33943125333  
CATATGAA 0.0321718706933  
CATATGAC -0.0241081301687  
CATATGAG -0.060116201835  
CATATGCA 0.0662861397196  
CATATGCC 0.0486140407475  
CATATGCG 0.0133070078757  
CATATGGA 0.0586550738066  
CATATGGC -0.287748969662  
CATATGGG -0.0444392060853  
CATATGTA 0.0566960885871  
CATATGTC -0.174479317427  
CATATTAA 0.176941380846  
CATATTAC 0.259056371028  
CATATTAG 0.07092034481  
CATATTCA -0.0407852382795  
CATATTCC 0.361957767348  
CATATTGC 0.107014234601  
CATATTGA -0.0448950986834  
CATATTGC 0.173428249186  
CATATTGG -0.171514254477  
CATATTTA 0.128991194324  
CATATTTT 0.345010693196  
CATCAAAA 0.0968497040211  
CATCAAAC 0.12507962508  
CATCAAAG -0.101560025514  
CATCAACA 0.0754349390713  
CATCAACC -0.227469611905  
CATCAACG 0.0587220717795  
CATCAAGA 0.0775088716282

CATCAAGC -0.147157413609  
CATCAAGG -0.0903144862197  
CATCAATA 0.0178053346118  
CATCAATC -0.209284117256  
CATCAATG -0.158854061227  
CATCACAA -0.0721622478664  
CATCACAC 0.152515638344  
CATCACAG 0.0863002183677  
CATCACCA 0.046220155763  
CATCACCC -0.185114887869  
CATCACCG -0.0116162994951  
CATCACGA 0.170750640448  
CATCACGC -0.130051304003  
CATCACGG -0.116238934515  
CATCACTA -0.014602757027  
CATCACTC -0.127244324214  
CATCAGAA 0.129981825216  
CATCAGAC 0.0238534399089  
CATCAGAG -0.066858308861  
CATCAGCA -0.0216440515901  
CATCAGCC -0.0769801989898  
CATCAGCG -0.0957227419226  
CATCAGGA 0.0171866080957  
CATCAGGC -0.103177754067  
CATCAGGG -0.123430455476  
CATCAGTA 0.104443698313  
CATCAGTC -0.204796407037  
CATCATAA 0.0330729984015  
CATCATAC 0.0583021037566  
CATCATAG 0.0796957589895  
CATCATCA -0.032808290384  
CATCATCC -0.180521438989  
CATCATCG -0.0079983564832  
CATCATGA 0.0770924419584  
CATCATGC -0.144868200127  
CATCATGG -0.0410915215941  
CATCATT A 0.0781688218213  
CATCATTC -0.0103124010107  
CATCCAAA 0.0580732247399  
CATCCAAC 0.0864680107104  
CATCCAAG -0.186570868389  
CATCCACA 0.0560389188558  
CATCCACC -0.0904688218506  
CATCCACG -0.0335007262615  
CATCCAGA 0.152580955611  
CATCCAGC -0.190394078485  
CATCCAGG -0.0660136720743  
CATCCATA -0.0654036772917  
CATCCATC -0.138746787205  
CATCCATG -0.0891373745955  
CATCCCAA -0.170450128596  
CATCCCAC -0.225187114915  
CATCCCAG -0.115496438011  
CATCCCCA -0.168355432034



CATCCCC -0.295592208087  
CATCCCCG -0.0937052473304  
CATCCCGA 0.0188273673122  
CATCCCGC -0.093696863903  
CATCCCGG -0.0513435634418  
CATCCCTA -0.151003066934  
CATCCCTC -0.181457315107  
CATCCGAA 0.095103756852  
CATCCGAC -0.194351936869  
CATCCGAG -0.139409884795  
CATCCGCA 0.0730283278468  
CATCCGCC -0.0961934539319  
CATCCGCG -0.0582943439195  
CATCCGGA 0.113575007514  
CATCCGGC -0.0852872821709  
CATCCGGG -0.238911568399  
CATCCGTA 0.0641288671592  
CATCCGTC -0.29749640261  
CATCCTAA -0.0193570094986  
CATCCTAC -0.168335729875  
CATCCTAG -0.142128250373  
CATCCTCA -0.168241015484  
CATCCTCC -0.049977977121  
CATCCTCG -0.300799254146  
CATCCTGA -0.0268684662624  
CATCCTGC -0.207470481679  
CATCCTGG -0.249629868572  
CATCCTTA 0.0105800602907  
CATCCTTC -0.106085424267  
CATCGAAA 0.172154247912  
CATCGAAC -0.048368513799  
CATCGAAG -0.0818993325228  
CATCGACA -0.175588257188  
CATCGACC -0.10696033988  
CATCGACG -0.205211030322  
CATCGAGA 0.210774216623  
CATCGAGC -0.377782497086  
CATCGAGG -0.116690430359  
CATCGATA 0.156976535764  
CATCGATC -0.0208748693597  
CATCGATG 0.157016695195  
CATCGCAA 0.0166670803445  
CATCGCAC 0.0677817274074  
CATCGCAG -0.123109898138  
CATCGCCA -0.0588217451848  
CATCGCCC -0.196473215263  
CATCGCCG -0.134822351822  
CATCGCGA 0.229569790176  
CATCGCGC 0.0145069004977  
CATCGCGG 0.0337926007782  
CATCGCTA -0.118404544264  
CATCGCTC -0.177719280065  
CATCGGAA 0.0449223328011  
CATCGGAC -0.130495229282

CATCGGAG -0.0333898608871  
CATCGGCA -0.293652959352  
CATCGGCC -0.118602227901  
CATCGGCG -0.0680737742605  
CATCGGGA -0.120456068088  
CATCGGGC -0.309882848354  
CATCGGGG -0.0190706042933  
CATCGGTA 0.0597001960638  
CATCGGTC -0.362441575573  
CATCGTAA 0.114504311474  
CATCGTAC -0.126674896405  
CATCGTAG -0.069634241586  
CATCGTCA -0.0125989941826  
CATCGTCC 0.103655997595  
CATCGTCG -0.238126845488  
CATCGTGA 0.0160798716588  
CATCGTGC -0.25025889414  
CATCGTGG -0.240692952201  
CATCGTTA -0.0682319023838  
CATCGTTC -0.171662407054  
CATCTAAA 0.0992190537645  
CATCTAAC 0.112265424845  
CATCTAAG -0.0530798595651  
CATCTACA 0.24227571659  
CATCTACC 0.0662687480869  
CATCTACG 0.0882571914484  
CATCTAGA 0.0702809427531  
CATCTAGC -0.159916210289  
CATCTAGG 0.00144279315349  
CATCTATA 0.147566841602  
CATCTATC -0.105779435487  
CATCTCAA -0.0564958431567  
CATCTCAC 0.151931285207  
CATCTCAG -0.0921251406694  
CATCTCCA -0.16500012406  
CATCTCCC -0.0892945286885  
CATCTCCG -0.048449275722  
CATCTCGA 0.185601045233  
CATCTCGC 0.0107669175128  
CATCTCGG -0.0984384373864  
CATCTCTA -0.088526543072  
CATCTCTC -0.247996725297  
CATCTGAA 0.0886426249038  
CATCTGAC -0.196211099807  
CATCTGAG -0.0661603221083  
CATCTGCA -0.109420231674  
CATCTGCC -0.109822071122  
CATCTGCG -0.0844222389291  
CATCTGGA 0.201600694875  
CATCTGGC -0.244269189405  
CATCTGGG -0.0884534672413  
CATCTGTA -0.0329752367317  
CATCTGTC -0.114172642235  
CATCTTAA -0.0691938868072

CATCTTAC 0.000444790465155  
CATCTTAG -0.119256273016  
CATCTTCA 0.112811158266  
CATCTTCC 0.290294426658  
CATCTTCG -0.0112909936279  
CATCTTGA -0.0536583415371  
CATCTTGC -0.0828865061349  
CATCTTGG -0.159722353992  
CATCTTTA 0.0867594140274  
CATCTTTC -0.212881852247  
CATGAAAA 0.236438918257  
CATGAAAC 0.132737969242  
CATGAAAG 0.0620358650662  
CATGAACA -0.0445473021231  
CATGAACC -0.0283657146638  
CATGAACG -0.0230513200441  
CATGAAGA 0.124154215601  
CATGAAGC -0.229536104515  
CATGAAGG 0.0962161412524  
CATGAATA 0.163420996754  
CATGAATC 0.160724084967  
CATGAATG -0.0914206258257  
CATGACAA -0.0818188836776  
CATGACAC -0.00293638386395  
CATGACAG -0.246317692441  
CATGACCA -0.114266840872  
CATGACCC -0.208987686175  
CATGACCG -0.180331397699  
CATGACGA -0.119878175345  
CATGACGC -0.316687200434  
CATGACGG -0.1250037552  
CATGACTA -0.120017647627  
CATGACTC -0.190221571595  
CATGAGAA 0.142915642916  
CATGAGAC -0.0553004922033  
CATGAGAG 0.0977816381961  
CATGAGCA -0.104855269362  
CATGAGCC -0.167689474453  
CATGAGCG -0.2018098113  
CATGAGGA -0.133849400905  
CATGAGGC -0.215240392964  
CATGAGGG -0.167432434602  
CATGAGTA 0.201825507471  
CATGAGTC -0.122677336821  
CATGATAA 0.0864183742972  
CATGATAC 0.132974460413  
CATGATAG 0.0291840324664  
CATGATCA -0.0758268067123  
CATGATCC 0.104528367992  
CATGATCG 0.114904160359  
CATGATGA 0.0648270475829  
CATGATGC 0.0229173387597  
CATGATGG -0.119918379727  
CATGATTA 0.26634380269

CATGATTC 0.298633344088  
CATGCAAA 0.0822158246401  
CATGCAAC -0.13416033113  
CATGCAAG 0.0247899681029  
CATGCACA -0.0610445384199  
CATGCACC -0.192490479728  
CATGCACG -0.234699387757  
CATGCAGA 0.102586731022  
CATGCAGC -0.286558040646  
CATGCAGG -0.0530185470391  
CATGCATA 0.144848409646  
CATGCATC -0.210551628408  
CATGCATG -0.22499813965  
CATGCCAA -0.0973114943955  
CATGCCAC 0.00997918131558  
CATGCCAG -0.294210774399  
CATGCCCA -0.0786651757757  
CATGCCCC -0.108249373402  
CATGCCCG -0.160951341158  
CATGCCGA 0.130488383466  
CATGCCGC -0.158749096959  
CATGCCGG 0.142136303585  
CATGCCTA -0.0521916437121  
CATGCCTC -0.136601128785  
CATGCGAA 0.110392290821  
CATGCGAC -0.182442619743  
CATGCGAG -0.134290393826  
CATGCGCA 0.121195278036  
CATGCGCC -0.13379925987  
CATGCGCG -0.00287213716781  
CATGCGGA 0.0445133804856  
CATGCGGC -0.215274504453  
CATGCGGG -0.171005911979  
CATGCGTA 0.0712709955134  
CATGCGTC -0.237143344498  
CATGCTAA -0.0130809985855  
CATGCTAC -0.0936424749823  
CATGCTAG -0.207318379068  
CATGCTCA -0.153061313862  
CATGCTCC -0.311627828924  
CATGCTCG -0.259868013  
CATGCTGA -0.0957475383751  
CATGCTGC -0.0833045047096  
CATGCTGG 0.00865836676731  
CATGCTTA -0.0655104139953  
CATGCTTC -0.256336295403  
CATGGAAA 0.111997672604  
CATGGAAC -0.0405515708546  
CATGGAAG -0.151464714201  
CATGGACA -0.24559776016  
CATGGACC -0.206698191  
CATGGACG -0.106563000396  
CATGGAGA 0.198257486136  
CATGGAGC -0.21063703721

CATGGAGG -0.222850794123  
CATGGATA 0.310164740918  
CATGGATC 0.169945427521  
CATGGCAA -0.104038975326  
CATGGCAC -0.0690863750279  
CATGGCAG -0.191466457153  
CATGGCCA -0.283307384423  
CATGGCCC -0.338331219956  
CATGGCCG -0.381556354817  
CATGGCGA -0.149188111605  
CATGGCGC -0.246923246437  
CATGGCGG -0.186780506103  
CATGGCTA -0.11279606257  
CATGGCTC -0.0712575370338  
CATGGGAA 0.0549033718756  
CATGGGAC -0.31154113882  
CATGGGAG -0.314901176075  
CATGGGCA -0.337248628151  
CATGGGCC -0.275682849984  
CATGGGCG -0.267695573827  
CATGGGGA 0.103197010284  
CATGGGGC -0.154837744551  
CATGGGGG -0.390136012237  
CATGGGTA -0.0227191449795  
CATGGGTC -0.38457627539  
CATGGTAA 0.014723035262  
CATGGTAC -0.26581345022  
CATGGTAG 0.184535375138  
CATGGTCA -0.227196297491  
CATGGTCC 0.0461442450165  
CATGGTCG -0.353570060174  
CATGGTGA -0.144925898885  
CATGGTGC -0.297119889803  
CATGGTGG -0.213041003525  
CATGGTTA -0.0567770415774  
CATGGTTC -0.191125016969  
CATGTAAG -0.0265023393648  
CATGTAAC 0.0896998927302  
CATGTAAG -0.0764194944636  
CATGTACA 0.0980811226642  
CATGTACC -0.180652877979  
CATGTACG 0.0026293511142  
CATGTAGA 0.0903097012474  
CATGTAGC -0.184137773257  
CATGTAGG 0.101547828821  
CATGTATA 0.274337788224  
CATGTATC 0.0243724589972  
CATGTCAA -0.16989579882  
CATGTCAC 0.0542229002285  
CATGTCAG -0.12087043586  
CATGTCCA 0.0180503511428  
CATGTCCC -0.152703675212  
CATGTCCG -0.0158338227549  
CATGTCSA -0.025588490763

CATGTCGC -0.108226164385  
CATGTCGG -0.00665323871065  
CATGTCTA -0.0996890579038  
CATGTCTC -0.0674674366359  
CATGTGAA -0.00643562549725  
CATGTGAC 0.0410570689975  
CATGTGAG 0.0306102826233  
CATGTGCA -0.0526915469004  
CATGTGCC -0.157868656011  
CATGTGCG -0.168331506485  
CATGTGGA -0.104763399342  
CATGTGGC -0.151189299877  
CATGTGGG -0.135965635789  
CATGTGTA 0.0258067985341  
CATGTGTC -0.254835075512  
CATGTTAA 0.00165041074132  
CATGTTAC -0.125843651522  
CATGTTAG -0.216967586275  
CATGTTCA -0.0341181401787  
CATGTTCC 0.0495441705656  
CATGTTCG -0.0802938621782  
CATGTTGA -0.0348702550231  
CATGTTGC -0.114298047523  
CATGTTGG -0.129761048113  
CATGTTTA 0.0853463062853  
CATGTTTC -0.0528702361612  
CATTAAAA -0.0800566406627  
CATTAAAC 0.078746790868  
CATTAAAG 0.148851970337  
CATTAAACA 0.203063945488  
CATTAAACC -0.0589862834138  
CATTAAACG -0.108360426542  
CATTAAAGA 0.194616402514  
CATTAAAGC -0.199629716661  
CATTAAAGG 0.0716093808165  
CATTAAATA 0.128620355893  
CATTAAATC 0.145820894433  
CATTAAATG 0.153387244809  
CATTACAA 0.161225964256  
CATTACAC -0.041442268715  
CATTACAG -0.179888252663  
CATTACCA 0.0732261186807  
CATTACCC -0.132632963405  
CATTACCG -0.0535650424839  
CATTACGA 0.136396727306  
CATTACGC -0.102575874135  
CATTACGG 0.0291052020759  
CATTACTA 0.0994313873102  
CATTACTC -0.164502585794  
CATTAGAA -0.14904748906  
CATTAGAC -0.176677831535  
CATTAGAG -0.0155872125569  
CATTAGCA -0.0134544499026  
CATTAGCC -0.0416611315081

CATTAGCG -0.0807015264602  
CATTAGGA 0.0388714115749  
CATTAGGC -0.233121900525  
CATTAGGG -0.204310514679  
CATTAGTA 0.0716123004606  
CATTAGTC -0.164700513185  
CATTATAA 0.275237038605  
CATTATAC 0.141928653258  
CATTATAG 0.134457639614  
CATTATCA 0.0478259600155  
CATTATCC 0.206383071904  
CATTATCG -0.0594014073928  
CATTATGA 0.0073420527966  
CATTATGC -0.0555514193931  
CATTATGG -0.114485971077  
CATTATTA 0.220345186987  
CATTATTC 0.17340861149  
CATTCAAA -0.0460033035791  
CATTCAAC 0.00725166602191  
CATTCAAG -0.00422648913366  
CATTCACA 0.155368130625  
CATTCACC -0.200167433278  
CATTCACG -0.116839937474  
CATTCAGA 0.187201010197  
CATTCAGC -0.213742015345  
CATTCAGG 0.00705021057933  
CATTCATA 0.108283030299  
CATTCATC -0.0439985439985  
CATTCCAA -0.101728640909  
CATTCCAC 0.0220425830091  
CATTCCAG -0.0266286710067  
CATTCCCA 0.0283713465532  
CATTCCCC -0.147469458988  
CATTCCCG -0.258654156228  
CATTCCGA -0.0900004963149  
CATTCCGC -0.218217942862  
CATTCCGG -0.250682628474  
CATTCCCTA -0.029711459472  
CATTCCCTC 0.0715246927368  
CATTCGAA -0.0750106191513  
CATTCGAC -0.0840209970382  
CATTCGAG 0.0617614212827  
CATTCGCA 0.120551374787  
CATTCGCC 0.0780408507681  
CATTCGCG 0.0201331357707  
CATTCGGA 0.0403833585652  
CATTCGGC -0.310788308402  
CATTCGGG -0.140692586987  
CATTCGTA -0.0364244017581  
CATTCGTC -0.107726838098  
CATTCTAA 0.0894159463587  
CATTCTAC -0.00194219683555  
CATTCTAG 0.0899659990569  
CATTCTCA 0.000972046426592

CATTCTCC -0.0386764174643  
CATTCTCG 0.00910875637282  
CATTCTGA 0.0502251562858  
CATTCTGC -0.161030755617  
CATTCTGG -0.0612775309745  
CATTCTTA 0.0181798938709  
CATTCTTC -0.0371156280247  
CATTGAAA 0.0892732275936  
CATTGAAC 0.0596359203813  
CATTGAAG 0.152407611512  
CATTGACA 0.121295884032  
CATTGACC -0.0408080256565  
CATTGACG -0.186117002803  
CATTGAGA -0.00608788568409  
CATTGAGC -0.340008874998  
CATTGAGG -0.110919009105  
CATTGATA 0.0716298183251  
CATTGATC 0.0958823837612  
CATTGCAA -0.090497793698  
CATTGCAC -0.0186053822417  
CATTGCAG -0.327873575101  
CATTGCCA 0.0991363264091  
CATTGCCC -0.161234776231  
CATTGCCG -0.258151773375  
CATTGCGA 0.0774242386637  
CATTGCGC -0.075106787228  
CATTGCGG 0.0448459877386  
CATTGCTA -0.0360760209245  
CATTGCTC -0.0274920987132  
CATTGGAA 0.104347350058  
CATTGGAC -0.162086328753  
CATTGGAG -0.0288401349007  
CATTGGCA -0.184914712231  
CATTGGCC -0.240525127718  
CATTGGCG -0.254498540245  
CATTGGGA -0.0501543761815  
CATTGGGC -0.299766264122  
CATTGGGG -0.284259557938  
CATTGGTA -0.169973972665  
CATTGGTC -0.0927483725816  
CATTGTAA -0.0341839229798  
CATTGTAC 0.0244473123261  
CATTGTAG -0.0953017548214  
CATTGTCA 0.141341166836  
CATTGTCC 0.0457220305705  
CATTGTCCG -0.0860018474859  
CATTGTGA 0.073950935381  
CATTGTGC -0.282381105956  
CATTGTGG -0.0199097829975  
CATTGTTA 0.101877359453  
CATTGTTC 0.0560038831266  
CATTTAAA 0.121640402035  
CATTTAAC 0.18359819875  
CATTTAAG 0.0850781911388



CATTTACA 0.1744421655  
CATTTACC 0.106834886827  
CATTTACG 0.225518907337  
CATTTAGA 0.116859484829  
CATTTAGC -0.214510251467  
CATTTAGG -0.130105332374  
CATTTATA 0.171499164252  
CATTTATC 0.104995511047  
CATTTCAA -0.0100735020401  
CATTTCAC 0.0320219265272  
CATTTCAG -0.0706018096179  
CATTTCCA 0.0768468192711  
CATTTCCC -0.211887491074  
CATTTCCG -0.0952347474146  
CATTTCGA 0.158559385832  
CATTTCGC -0.102929134732  
CATTTCGG 0.116139792559  
CATTTCTA 0.00883951366983  
CATTTCTC 0.0973880216304  
CATTTGAA 0.120373276498  
CATTTGAC 0.082032510237  
CATTTGAG 0.0841580111384  
CATTTGCA 0.0484186477668  
CATTTGCC -0.00432180317219  
CATTTGCG -0.110261987666  
CATTTGGA -0.0334976850128  
CATTTGGC -0.101905067772  
CATTTGGG -0.254158889348  
CATTTGTA 0.113774880842  
CATTTGTC -0.107952775227  
CATTTTAA -0.0751656697526  
CATTTTAC 0.0458226821863  
CATTTTAG -0.038690393641  
CATTTTCA 0.156208988124  
CATTTTCC 0.104026189208  
CATTTTCG 0.0144235144235  
CATTTTGA -0.105707636011  
CATTTTGC 0.0556184901061  
CATTTTGG -0.136135304059  
CATTTTTA 0.142995612693  
CATTTTTTC 0.018183735762  
CCAAAAAA 0.0860295030036  
CCAAAAAC -0.127508878046  
CCAAAAAG 0.138373911101  
CCAAAAACA 0.0420363057743  
CCAAAAACC -0.113296275157  
CCAAAAACG -0.0623407960598  
CCAAAAAGA -0.0381429603731  
CCAAAAAGC -0.0630491661359  
CCAAAAAGG -0.166954762121  
CCAAAATA 0.234497582982  
CCAAAATC 0.394842500903  
CCAAACAA -0.0434147513644  
CCAAACAC -0.138422652276

CCAAACAG -0.22987652591  
CCAAACCA 0.0496033223306  
CCAAACCC -0.0993722551671  
CCAAACCG -0.307948305224  
CCAAACGA -0.161565652806  
CCAAACGC 0.25990598746  
CCAAACGG -0.0313932936833  
CCAAACTA -0.0254400405916  
CCAAACTC 0.133565808741  
CCAAAGAA 0.159330998564  
CCAAAGAC 0.0534656427124  
CCAAAGAG -0.086317087947  
CCAAAGCA -0.206651283196  
CCAAAGCC -0.261393237242  
CCAAAGCG -0.110231749103  
CCAAAGGA 0.0829801955773  
CCAAAGGC -0.320764009789  
CCAAAGGG -0.33097080636  
CCAAAGTA -0.189574189518  
CCAAAGTC -0.0970672175062  
CCAAATAA -0.00545643536785  
CCAAATAC -0.0466382696712  
CCAAATAG -0.116624686701  
CCAAATCA 0.259307516883  
CCAAATCC 0.3137588228  
CCAAATCG 0.231059903798  
CCAAATGA 0.0728097243249  
CCAAATGC -0.123279223101  
CCAAATGG -0.20020899333  
CCAAATTA 0.191777176626  
CCAAATTC 0.213109931899  
CCAACAAA 0.219909782997  
CCAACAAC -0.179951361144  
CCAACAAG 0.0685131647517  
CCAACACA -0.053750989134  
CCAACACC -0.193240887775  
CCAACACG -0.301092789313  
CCAACAGA 0.0276295800006  
CCAACAGC -0.247218634383  
CCAACAGG -0.307631752128  
CCAACATA 0.0655686371831  
CCAACATC 0.0428100276585  
CCAACCAA -0.199346243034  
CCAACCAC -0.276305815354  
CCAACCAG -0.09499241889  
CCAACCCA -0.101851622065  
CCAACCCC -0.188695999872  
CCAACCCG -0.325069763115  
CCAACCGA -0.188896316286  
CCAACCGC 0.00897453927757  
CCAACCGG -0.293167227611  
CCAACCTA 0.0032663517512  
CCAACCTC -0.0595615217709  
CCAACGAA -0.0658883382116

CCAACGAC -0.238107843543  
CCAACGAG -0.0559764291334  
CCAACGCA -0.027024344244  
CCAACGCC -0.285975402989  
CCAACGCG -0.155953519266  
CCAACGGA -0.131507282698  
CCAACGGC -0.20598741841  
CCAACGGG -0.28795338243  
CCAACGTA -0.00807930402173  
CCAACGTC -0.36134214025  
CCAACGTA -0.0539092824017  
CCAACGTC -0.172269324572  
CCAACGTA -0.083613875172  
CCAACGTC -0.108909621763  
CCAACGTA -0.177488561483  
CCAACGTC -0.00754800989759  
CCAACGTA -0.0214551636842  
CCAACGTC -0.0155948563554  
CCAACGTA -0.288923348358  
CCAACGTC 0.0350422983438  
CCAACGTC 0.121861530952  
CCAAGAAA 0.0485999090044  
CCAAGAAC -0.0744634660712  
CCAAGAAG 0.0520857207506  
CCAAGACA 0.0913403356131  
CCAAGACC -0.207029236575  
CCAAGACG 0.0471131727211  
CCAAGAGA -0.117655978187  
CCAAGAGC -0.153181318181  
CCAAGAGG -0.332618583117  
CCAAGATA 0.233226279717  
CCAAGATC 0.259745407035  
CCAAGCAA 0.00343569118924  
CCAAGCAC -0.200221055504  
CCAAGCAG -0.181458292286  
CCAAGCCA -0.123383750443  
CCAAGCCC -0.13749450851  
CCAAGCCG -0.295379442446  
CCAAGCGA -0.126539239591  
CCAAGCGC -0.0627853385604  
CCAAGCGG -0.225588578233  
CCAAGCTA -0.166963091644  
CCAAGCTC -0.227465527786  
CCAAGGAA -0.0931835996514  
CCAAGGAC -0.214020304261  
CCAAGGAG -0.322840649246  
CCAAGGCA 0.0796821967402  
CCAAGGCC -0.22492397864  
CCAAGGCG -0.00722347692045  
CCAAGGGA -0.110124239288  
CCAAGGGC -0.334201668858  
CCAAGGGG -0.342541375556  
CCAAGGTA -0.105735086134  
CCAAGGTC -0.0635561152329

CCAAGTAA -0.0368862577381  
CCAAGTAC -0.0403608029976  
CCAAGTAG -0.223083794447  
CCAAGTCA 0.0318263103728  
CCAAGTCC -0.0643495427237  
CCAAGTCG -0.256293741955  
CCAAGTGA -0.182395853555  
CCAAGTGC -0.0883225847747  
CCAAGTGG -0.0610453936432  
CCAAGTTA 0.0903534959088  
CCAAGTTC -0.158196108919  
CCAATAAA 0.18478671509  
CCAATAAC -0.0957183419341  
CCAATAAG 0.205319644714  
CCAATACA 0.0844470559039  
CCAATACC -0.128721998788  
CCAATACG -0.0148615281535  
CCAATAGA 0.182497463559  
CCAATAGC -0.207375528559  
CCAATAGG -0.074077922239  
CCAATATA 0.203962686948  
CCAATATC 0.243534167777  
CCAATCAA -0.0139433456585  
CCAATCAC -0.0334728668062  
CCAATCAG -0.157900767314  
CCAATCCA -0.0178777107071  
CCAATCCC 0.0599765491228  
CCAATCCG 0.0200190263474  
CCAATCGA 0.0378904111589  
CCAATCGC 0.00381762154014  
CCAATCGG 0.153467442319  
CCAATCTA 0.145954494439  
CCAATCTC 0.245637686766  
CCAATGAA 0.0354682657737  
CCAATGAC -0.0642511477851  
CCAATGAG -0.205624608904  
CCAATGCA -0.0669471124017  
CCAATGCC -0.0911384478855  
CCAATGCG -0.164062133759  
CCAATGGA -0.280902312045  
CCAATGGC -0.300546659409  
CCAATGGG -0.239740546858  
CCAATGTA -0.107950174934  
CCAATGTC -0.0681165893319  
CCAATTAA 0.123622840376  
CCAATTAC 0.0832062071633  
CCAATTAG -0.0346218695941  
CCAATTCA 0.0431107348014  
CCAATTCC -0.00282513918878  
CCAATTCG -0.297142293713  
CCAATTGA 0.00550398371764  
CCAATTGC 0.026293584812  
CCAATTGG 0.055315190156  
CCAATTTA -0.13341386685

CCAATTC 0.155041130486  
CCACAAA 0.0966379602743  
CCACAAAC -0.0356740904665  
CCACAAAG -0.0370204915659  
CCACAACA 0.0803420363058  
CCACAACC 0.00708197515798  
CCACAACG -0.208979173082  
CCACAAGA -0.168568342856  
CCACAAGC -0.259316364549  
CCACAAGG -0.127707480461  
CCACAATA 0.049906922485  
CCACAATC 0.376490295833  
CCACACAA 0.146265523579  
CCACACAC -0.162680881806  
CCACACAG 0.030456997292  
CCACACCA -0.0394818476891  
CCACACCC -0.155639373461  
CCACACCG -0.243952963358  
CCACACGA -0.148434592194  
CCACACGC -0.0357855421652  
CCACACGG 0.00536873888406  
CCACACTA -0.0553349711724  
CCACACTC 0.0825357037478  
CCACAGAA 0.0331693466566  
CCACAGAC -0.326027272652  
CCACAGAG -0.00960927862894  
CCACAGCA 0.0338021440802  
CCACAGCC -0.336921011738  
CCACAGCG -0.0592172563163  
CCACAGGA -0.000505828339525  
CCACAGGC -0.183348907468  
CCACAGGG -0.106850542392  
CCACAGTA -0.0996306650219  
CCACAGTC -0.0947859196947  
CCACATAA -0.106010664931  
CCACATAC -0.120042239007  
CCACATAG -0.0306944616785  
CCACATCA 0.131178879295  
CCACATCC -0.104852167548  
CCACATCG -0.234987731095  
CCACATGA -0.0531035006255  
CCACATGC -0.15765810481  
CCACATGG -0.137269740539  
CCACATTA -0.119692370468  
CCACATTC 0.147851708458  
CCACCAA -0.0831976982668  
CCACCAAC -0.24897670611  
CCACCAAG 0.05433092706  
CCACCACA 0.136422924302  
CCACCACC -0.172004278912  
CCACCACG -0.277357312042  
CCACCAGA -0.159766971076  
CCACCAGC -0.315644475316  
CCACCAGG -0.219505437704

CCACCATA -0.0161951918768  
CCACCATC -0.115174972885  
CCACCCAA -0.0397662824902  
CCACCCAC -0.150751115853  
CCACCCAG -0.222455748601  
CCACCCCA 0.143987357941  
CCACCCCC -0.314120743589  
CCACCCCG -0.308836296518  
CCACCCGA -0.182911094018  
CCACCCGC -0.000263445576231  
CCACCCGG -0.140706551858  
CCACCCTA -0.146435665094  
CCACCCTC -0.0815392843654  
CCACCGAA -0.102669065641  
CCACCGAC -0.157163180401  
CCACCGAG -0.0382765685796  
CCACCGCA -0.0768614897757  
CCACCGCC -0.376655164112  
CCACCGCG -0.295256131414  
CCACCGGA -0.0724927789641  
CCACCGGC -0.3410788521  
CCACCGGG -0.243504138936  
CCACCGTA -0.0416377743553  
CCACCGTC -0.0843390103421  
CCACCTAA 0.026689331712  
CCACCTAC -0.183769168618  
CCACCTAG -0.319027446044  
CCACCTCA -0.0360051263861  
CCACCTCC -0.274933960798  
CCACCTCG -0.231646559738  
CCACCTGA -0.240498617555  
CCACCTGC -0.152018068113  
CCACCTGG -0.400625223424  
CCACCTTA -0.144939477491  
CCACCTTC -0.186706509921  
CCACGAAA 0.0399860749887  
CCACGAAC -0.184655815199  
CCACGAAG -0.110430056828  
CCACGACA 0.00212471424593  
CCACGACC -0.289485051507  
CCACGACG -0.21722559925  
CCACGAGA 0.154379467746  
CCACGAGC -0.2205873839  
CCACGAGG -0.19414887795  
CCACGATA 0.223168105808  
CCACGATC 0.236292766596  
CCACGCAA 0.114504791866  
CCACGCAC -0.13935871334  
CCACGCAG -0.24695301269  
CCACGCCA 0.0265789205183  
CCACGCCC -0.283616207516  
CCACGCCG -0.169592883674  
CCACGCGA 0.0864623402407  
CCACGCGC 0.0442961103042

CCACGCGG -0.19433745262  
CCACGCTA -0.0669481690182  
CCACGCTC -0.101047068456  
CCACGGAA -0.0685612822335  
CCACGGAC -0.0956005018544  
CCACGGAG -0.237919619404  
CCACGGCA 0.0221998858362  
CCACGGCC -0.218185837931  
CCACGGCG -0.0610409411869  
CCACGGGA -0.0450346892274  
CCACGGGC -0.253814473913  
CCACGGGG -0.32633463138  
CCACGGTA -0.31437561504  
CCACGGTC -0.235208662405  
CCACGTAA 0.0154514864638  
CCACGTAC -0.198110242732  
CCACGTAG -0.151762795327  
CCACGTCA 0.0534345963227  
CCACGTCC -0.167748126418  
CCACGTCCG -0.141846833764  
CCACGTGA -0.00178828966708  
CCACGTGC 0.0174706386828  
CCACGTGG 0.00341081040855  
CCACGTTA -0.0383347711153  
CCACGTTC -0.19512560005  
CCACTAAA 0.0416333948892  
CCACTAAC 0.111884611885  
CCACTAAG 0.190532173611  
CCACTACA 0.136749697356  
CCACTACC -0.2292488525  
CCACTACG -0.220772501244  
CCACTAGA 0.0493446454195  
CCACTAGC -0.15046895224  
CCACTAGG 0.00177180138583  
CCACTATA 0.000554002467099  
CCACTATC 0.130670861222  
CCACTCAA 0.0775886078916  
CCACTCAC -0.18940139554  
CCACTCAG -0.118677783016  
CCACTCCA -0.025643065345  
CCACTCCC -0.186180140766  
CCACTCCG -0.284150784815  
CCACTCGA -0.17293522217  
CCACTCGC -0.0422595712478  
CCACTCGG -0.10139809048  
CCACTCTA -0.0418779661204  
CCACTCTC -0.148492013106  
CCACTGAA 0.0654489317752  
CCACTGAC -0.313415902913  
CCACTGAG -0.227600956774  
CCACTGCA 0.0520393431711  
CCACTGCC -0.226678009435  
CCACTGCG -0.123545465823  
CCACTGGA 0.0254731648212

CCACTGGC -0.300275532348  
CCACTGGG -0.344776794508  
CCACTGTA -0.207361279954  
CCACTGTC 0.129262871687  
CCACTTAA -0.101870921317  
CCACTTAC -0.10797888723  
CCACTTAG -0.175286857105  
CCACTTCA 0.0558870973628  
CCACTTCC -0.186484175132  
CCACTTCG -0.210908622957  
CCACTTGA 0.0531068258341  
CCACTTGC -0.314251141817  
CCACTTTA -0.234449048458  
CCACTTTC 0.061740804165  
CCAGAAAA 0.245558856375  
CCAGAAAC -0.0516707365311  
CCAGAAAG -0.00387420551213  
CCAGAACA 0.0053626562922  
CCAGAACC -0.255123036042  
CCAGAACG -0.281212356766  
CCAGAAGA -0.126994169458  
CCAGAAGC -0.352629689987  
CCAGAAGG -0.265136542432  
CCAGAATA 0.163373794734  
CCAGAATC 0.417676874209  
CCAGACAA 0.0772742439409  
CCAGACAC -0.268548149251  
CCAGACAG 0.000332076551308  
CCAGACCA -0.32712435326  
CCAGACCC -0.367174560657  
CCAGACCG -0.259847327576  
CCAGACGA -0.0798946988905  
CCAGACGC -0.0903000074444  
CCAGACGG -0.248735138701  
CCAGACTA -0.173840042381  
CCAGACTC -0.23042973236  
CCAGAGAA 0.0937593481109  
CCAGAGAC -0.196255278034  
CCAGAGAG -0.158295549235  
CCAGAGCA -0.196949399224  
CCAGAGCC -0.318673052312  
CCAGAGCG -0.157344237984  
CCAGAGGA -0.0434124637995  
CCAGAGGC -0.296035171268  
CCAGAGGG -0.295047775789  
CCAGAGTA -0.181921941295  
CCAGAGTC -0.10813243463  
CCAGATAA 0.182859499427  
CCAGATAC 0.384551217885  
CCAGATAG 0.107605672868  
CCAGATCA 0.0995620533857  
CCAGATCC 0.313311934524  
CCAGATCG 0.281572666292  
CCAGATGA -0.080156386566



CCAGATGC 0.106918629178  
CCAGATGG -0.200639712998  
CCAGATTA 0.386081326686  
CCAGATTC 0.448950022992  
CCAGCAAA 0.196094246111  
CCAGCAAC -0.172812724837  
CCAGCAAG -0.0235509044441  
CCAGCACA -0.0194426399422  
CCAGCACC -0.296188939198  
CCAGCACG -0.172814540963  
CCAGCAGA -0.224132749974  
CCAGCAGC -0.140819997519  
CCAGCAGG -0.30476886014  
CCAGCATA 0.0371225447618  
CCAGCATC -0.0788836740801  
CCAGCCAA -0.115920089341  
CCAGCCAC -0.193600103664  
CCAGCCAG -0.18757890988  
CCAGCCCA -0.1935059022  
CCAGCCCC -0.316414291738  
CCAGCCCG -0.229738327003  
CCAGCCGA -0.142283544681  
CCAGCCGC 0.209050648445  
CCAGCCGG -0.454771293701  
CCAGCCTA -0.0180735553197  
CCAGCCTC -0.178795891356  
CCAGCGAA -0.0415415415415  
CCAGCGAC 0.0293577539709  
CCAGCGAG -0.0658898549371  
CCAGCGCA -0.0301077003251  
CCAGCGCC -0.423785153554  
CCAGCGCG -0.12227719521  
CCAGCGGA -0.178736013596  
CCAGCGGC -0.416732116923  
CCAGCGGG -0.424383920586  
CCAGCGTA -0.27473018236  
CCAGCGTC 0.068372780494  
CCAGCTAA -0.00484125953034  
CCAGCTAC -0.0955964443484  
CCAGCTAG -0.326664020442  
CCAGCTCA -0.170191475354  
CCAGCTCC -0.364660593357  
CCAGCTCG -0.136617847735  
CCAGCTGA -0.155824318289  
CCAGCTGC -0.187777192401  
CCAGCTGG -0.116528442714  
CCAGCTTA -0.159059262752  
CCAGCTTC -0.0744551660519  
CCAGGAAA 0.223795829288  
CCAGGAAC -0.20699313809  
CCAGGAAG 0.0146606661758  
CCAGGACA -0.228093872458  
CCAGGACC -0.321410801701  
CCAGGACG -0.15047395717

CCAGGAGA -0.09838882655  
CCAGGAGC -0.282464653355  
CCAGGAGG -0.103205690443  
CCAGGATA 0.247044200808  
CCAGGATC 0.159617672606  
CCAGGCAA -0.0172850614912  
CCAGGCAC -0.406333753026  
CCAGGCAG -0.252045695702  
CCAGGCCA -0.120603048077  
CCAGGCCC -0.363507184775  
CCAGGCCG -0.313238905206  
CCAGGCCGA -0.0980834925598  
CCAGGCCG -0.140100809482  
CCAGGCCG -0.202901988029  
CCAGGCTA -0.293834878266  
CCAGGCTC -0.147359425792  
CCAGGGAA -0.145930605078  
CCAGGGAC -0.0812538426121  
CCAGGGAG -0.296446494862  
CCAGGGCA -0.301792152874  
CCAGGGCC -0.340794662566  
CCAGGGCG -0.264314785926  
CCAGGGGA -0.197134784645  
CCAGGGGC -0.306990994567  
CCAGGGGG -0.339936679814  
CCAGGGTA -0.0428862889091  
CCAGGGTC -0.216860605088  
CCAGGTAA 0.0343985168208  
CCAGGTAC -0.0879210268713  
CCAGGTAG -0.156162989801  
CCAGGTCA -0.232165920676  
CCAGGTCC -0.38750496044  
CCAGGTCCG -0.303281415769  
CCAGGTGA -0.0898991666656  
CCAGGTGC -0.324048850596  
CCAGGTTA -0.147712726439  
CCAGGTTC -0.163523651191  
CCAGTAAA 0.177463582897  
CCAGTAAC -0.0647058823529  
CCAGTAAG 0.0375455662757  
CCAGTACA -0.0510861266858  
CCAGTACC -0.164953256857  
CCAGTACG -0.104810982351  
CCAGTAGA 0.0256744347653  
CCAGTAGC -0.155632541595  
CCAGTAGG -0.108184232077  
CCAGTATA -0.175891697885  
CCAGTATC 0.146555519125  
CCAGTCAA 0.090045576327  
CCAGTCAC -0.231446251742  
CCAGTCAG -0.0572317514812  
CCAGTCCA -0.283762995311  
CCAGTCCC -0.255698058705  
CCAGTCCG -0.259885525649

CCAGTCGA -0.093969475121  
CCAGTCGC 0.0200828294359  
CCAGTCGG -0.222067615902  
CCAGTCTA -0.220140973583  
CCAGTCTC 0.0314842847414  
CCAGTGAA -0.112360108191  
CCAGTGAC -0.205891111004  
CCAGTGAG -0.129809773543  
CCAGTGCA -0.0203778228331  
CCAGTGCC -0.377110402638  
CCAGTGCG -0.102544469829  
CCAGTGGA -0.0696838755356  
CCAGTGGC -0.227756208291  
CCAGTGGG -0.253986169336  
CCAGTGTA -0.0854724448525  
CCAGTGTC -0.130293581674  
CCAGTTAA -0.251031524438  
CCAGTTAC -0.00407234735719  
CCAGTTAG -5.10152025303E-5  
CCAGTTCA -0.144665271678  
CCAGTTCC -0.246662296914  
CCAGTTCG -0.283047830509  
CCAGTTGA -0.0157517929374  
CCAGTTGC -0.316096382729  
CCAGTTTA -0.0968261846659  
CCAGTTTC -0.0119771099903  
CCATAAAA 0.154428369358  
CCATAAAC 0.0175037296249  
CCATAAAG -0.00151238167716  
CCATAACA 0.103531906562  
CCATAACC -0.315822259709  
CCATAACG -0.0346417879293  
CCATAAGA 0.114969015277  
CCATAAGC -0.198334026577  
CCATAAGG -0.160861449553  
CCATAATA 0.161151509636  
CCATAATC 0.294970913046  
CCATACAA 0.0751784842694  
CCATACAC -0.221532998646  
CCATACAG -0.102379565688  
CCATACCA -0.135462418422  
CCATACCC -0.0946619336551  
CCATACCG -0.0353669519221  
CCATACGA -0.0462128795462  
CCATACGC -0.0694316931755  
CCATACGG -0.195931283774  
CCATACTA 0.07319027016  
CCATACTC -0.00972184305518  
CCATAGAA -0.00102168283986  
CCATAGAC -0.0927249563613  
CCATAGAG -0.151616034436  
CCATAGCA 0.0427173822602  
CCATAGCC -0.142732688771  
CCATAGCG -0.0129773185912

CCATAGGA 0.070891148369  
CCATAGGC -0.260626224791  
CCATAGGG -0.195017752567  
CCATAGTA -0.144490220248  
CCATAGTC -0.083946762655  
CCATATAA 0.0661088085331  
CCATATAC -0.0438275074268  
CCATATAG -0.173906792562  
CCATATCA 0.239566012293  
CCATATCC 0.33894659241  
CCATATCG 0.256081150021  
CCATATGA -0.071472298745  
CCATATGC 0.0526754888579  
CCATATGG -0.123226034061  
CCATATTA 0.178819315183  
CCATATTC 0.215896732188  
CCATCAAA 0.122280682887  
CCATCAAC -0.0527832231845  
CCATCAAG -0.127510818246  
CCATCACA 0.00722856474885  
CCATCACC -0.246049530227  
CCATCACG -0.144259857308  
CCATCAGA -0.106521452387  
CCATCAGC -0.212275478424  
CCATCAGG -0.127329920298  
CCATCATA 0.0241412211109  
CCATCATC 0.101705072152  
CCATCCAA 0.0584510129965  
CCATCCAC -0.0788015160162  
CCATCCAG -0.170917375807  
CCATCCCA -0.301304919497  
CCATCCCC -0.223490267751  
CCATCCCG -0.0747996327635  
CCATCCGA -0.176427764611  
CCATCCGC 0.0112260217882  
CCATCCGG -0.157366476995  
CCATCCTA -0.273314587382  
CCATCCTC -0.192722403438  
CCATCGAA 0.0885306794398  
CCATCGAC 0.0150963635812  
CCATCGAG 0.0626575617219  
CCATCGCA 0.0736385334628  
CCATCGCC -0.13441954351  
CCATCGCG 0.0419158704554  
CCATCGGA -0.14053293187  
CCATCGGC -0.138687361807  
CCATCGGG -0.223776802031  
CCATCGTA 0.078204856828  
CCATCGTC 0.0136858823237  
CCATCTAA -0.042423158617  
CCATCTAC -0.0330248242739  
CCATCTAG -0.275198357395  
CCATCTCA -0.0158850310365  
CCATCTCC -0.181668307019

CCATCTCG -0.131473164438  
CCATCTGA -0.144002107878  
CCATCTGC -0.0120866455457  
CCATCTTA -0.0452215279025  
CCATCTTC 0.0384116899268  
CCATGAAA 0.196383290877  
CCATGAAC 0.0229805186748  
CCATGAAG -0.158950100469  
CCATGACA -0.157321258735  
CCATGACC -0.257187199356  
CCATGACG -0.21601752369  
CCATGAGA 0.0197905551282  
CCATGAGC -0.166480819557  
CCATGAGG -0.295857074729  
CCATGATA 0.171037428613  
CCATGATC 0.0155346551852  
CCATGCAA -0.13245646689  
CCATGCAC -0.264520521754  
CCATGCAG -0.284203867231  
CCATGCCA -0.226639821003  
CCATGCCC -0.291595221035  
CCATGCCG 0.182243715413  
CCATGCGA -0.00870429658308  
CCATGCGC -0.0957907653279  
CCATGCGG -0.212927576329  
CCATGCTA -0.0932506693357  
CCATGCTC -0.0793178089369  
CCATGGAA -0.0696284022978  
CCATGGAC -0.217838977794  
CCATGGAG -0.242054140171  
CCATGGCA -0.177054991827  
CCATGGCC -0.369953801315  
CCATGGCG -0.0668568625991  
CCATGGGA -0.234626447895  
CCATGGGC -0.312586177966  
CCATGGGG -0.140048564765  
CCATGGTA -0.228713442314  
CCATGGTC -0.287901160712  
CCATGTAA 0.137812310679  
CCATGTAC -0.229103818677  
CCATGTAG -0.0789710208459  
CCATGTCA -0.0845027144044  
CCATGTCC -0.0761171355231  
CCATGTCC -0.170916419235  
CCATGTGA -0.0683316083959  
CCATGTGC -0.170537103036  
CCATGTTA -0.170335442776  
CCATGTTC 0.02579576822  
CCATTAAC 0.148323029423  
CCATTAAC 0.128465931496  
CCATTAAG 0.121696076242  
CCATTACA 0.0152162752815  
CCATTACC -0.173354030717  
CCATTACG 0.0274439245856

CCATTAGA -0.0158748348576  
CCATTAGC -0.081755309028  
CCATTAGG -0.0380738109077  
CCATTATA 0.0639578972912  
CCATTATC 0.15265578126  
CCATTCAA 0.0388749631174  
CCATTCAC -0.189465194193  
CCATTCAG -0.252131588663  
CCATTCCA 0.0325376308409  
CCATTCCC -0.174631889705  
CCATTCCG -0.134927446747  
CCATTCGA -0.129761392086  
CCATTCGC 0.0220834580265  
CCATTCGG -0.0797290255341  
CCATTCTA 0.00685587921495  
CCATTCTC 0.0232853558212  
CCATTGAA 0.190529404466  
CCATTGAC -0.0279140616219  
CCATTGAG -0.233428707678  
CCATTGCA -0.229934634036  
CCATTGCC -0.159239497594  
CCATTGCG -0.120836953014  
CCATTGGA -0.193520960653  
CCATTGGC -0.252742739164  
CCATTGGG -0.270884082487  
CCATTGTA -0.0766124250973  
CCATTGTC 0.164970840055  
CCATTTAA 0.157715566806  
CCATTTAC 0.0780956697917  
CCATTTAG -0.255225701564  
CCATTTCA -0.108009515678  
CCATTTCC -0.233864284828  
CCATTTCCG -0.138224418983  
CCATTTGA -0.0951110559623  
CCATTTGC 0.0194285194285  
CCATTTTA -0.242529007434  
CCATTTTC 0.0653339289703  
CCCAAAA 0.110592468778  
CCCAAAAC -0.119679558382  
CCCAAAAG -0.0849380470781  
CCCAAAACA -0.123212077953  
CCCAAAACC -0.0888569931657  
CCCAAACG 0.114981372557  
CCCAAAGA 0.0767789332605  
CCCAAAGC -0.293551570075  
CCCAAAGG -0.295796429074  
CCCAAATA 0.122025795056  
CCCAAATC 0.340180410452  
CCCAACAA -0.0214083549001  
CCCAACAC -0.200755779252  
CCCAACAG -0.194823843196  
CCCAACCA -0.393226733691  
CCCAACCC -0.183504105987  
CCCAACCG -0.086441172821

CCCAACGA -0.0167233349052  
CCCAACGC -0.109542856726  
CCCAACGG -0.232376072467  
CCCAACTA -0.266784078487  
CCCAACTC -0.118734923982  
CCCAAGAA -0.104029676683  
CCCAAGAC -0.05278295532  
CCCAAGAG 0.0313657206354  
CCCAAGCA -0.249341516766  
CCCAAGCC -0.167784877452  
CCCAAGCG -0.190537655435  
CCCAAGGA -0.201211085541  
CCCAAGGC -0.201363559922  
CCCAAGGG -0.324613116155  
CCCAAGTA -0.0875788933833  
CCCAAGTC -0.125747388791  
CCCAATAA 0.0634256184171  
CCCAATAC -0.264967125667  
CCCAATAG -0.194876566183  
CCCAATCA -0.0495850455829  
CCCAATCC -0.0294605900667  
CCCAATCG 0.124522090757  
CCCAATGA -0.11569756324  
CCCAATGC -0.261589869565  
CCCAATTA -0.00806511650991  
CCCAATTC -0.114504311474  
CCCACAAA 0.0890548621622  
CCCACAAC -0.0745740719929  
CCCACAAG -0.223082087319  
CCCACACA -0.102463683008  
CCCACACC -0.070525910173  
CCCACACG 0.121491805013  
CCCACAGA -0.228166491766  
CCCACAGC -0.189872207783  
CCCACAGG -0.300647515498  
CCCACATA -0.0490659166425  
CCCACATC -0.0860077162364  
CCCACCAA 0.0769923027404  
CCCACCAC -0.146319777011  
CCCACCAG -0.350502415417  
CCCACCCA -0.0726982472683  
CCCACCCC -0.158426566777  
CCCACCCG 0.065833283101  
CCCACCGA 0.0383532171871  
CCCACCGC -0.161314568339  
CCCACCGG -0.115450462745  
CCCACCTA -0.313334099346  
CCCACCTC -0.244693302433  
CCCACGAA -0.100354331251  
CCCACGAC -0.268636792914  
CCCACGAG -0.10927208009  
CCCACGCA -0.29125972038  
CCCACGCC -0.227706785624  
CCCACGCG 0.0751203563541

CCCACGGA -0.0428674055159  
CCCACGGC -0.0291130026222  
CCCACGGG -0.374046673657  
CCCACGTA -0.233953971838  
CCCACGTC -0.194154281319  
CCCCTAA 0.0195282017344  
CCCCTAC -0.16855705986  
CCCCTAG -0.166317905552  
CCCCTCA -0.198311050919  
CCCCTCC -0.278775529391  
CCCCTCG -0.13441323139  
CCCCTGA -0.149796393252  
CCCCTGC -0.145460860935  
CCCCTTA -0.11944644349  
CCCCTTC -0.17351022082  
CCCAGAAA 0.0899681028883  
CCCAGAAC -0.0852474832766  
CCCAGAAG -0.128203649888  
CCCAGACA -0.101926984678  
CCCAGACC -0.325995651131  
CCCAGACG -0.00767647423779  
CCCAGAGA -0.146528932227  
CCCAGAGC -0.181053017222  
CCCAGAGG -0.265286632104  
CCCAGATA 0.319130425191  
CCCAGATC 0.251640475026  
CCCAGCAA -0.0314246594938  
CCCAGCAC -0.23596318039  
CCCAGCAG -0.18669584903  
CCCAGCCA -0.215326877648  
CCCAGCCC -0.06269893275  
CCCAGCCG -0.160577917937  
CCCAGCGA -0.192081214076  
CCCAGCGC -0.189107891538  
CCCAGCGG -0.346668096512  
CCCAGCTA -0.175663689369  
CCCAGCTC -0.178571330096  
CCCAGGAA -0.0481243469607  
CCCAGGAC -0.326771523316  
CCCAGGAG -0.294179355902  
CCCAGGCA -0.352614462164  
CCCAGGCC -0.141201133012  
CCCAGGCG -0.16629108036  
CCCAGGGA -0.266631381922  
CCCAGGGC -0.386001326918  
CCCAGGGG -0.260989010989  
CCCAGGTA -0.178559908692  
CCCAGGTC -0.298078087896  
CCCAGTAA -0.0992990235414  
CCCAGTAC -0.167488788256  
CCCAGTAG 0.03088326533  
CCCAGTCA -0.178945102418  
CCCAGTCC -0.210884241226  
CCCAGTCG -0.0786068581796



CCCAGTGA -0.227633443414  
CCCAGTGC -0.304577287513  
CCCAGTTA -0.214392855272  
CCCAGTTC -0.229325328901  
CCCATAAA 0.148036466218  
CCCATAAC -0.0643698479963  
CCCATAAG 0.00265906585987  
CCCATACA -0.189626398988  
CCCATACC 0.0215825910027  
CCCATACG -0.132171521076  
CCCATAGA 0.0227348560682  
CCCATAGC -0.0388513932657  
CCCATAGG -0.147525850683  
CCCATATA -0.0193511705002  
CCCATATC 0.266612409947  
CCCATCAA -0.031812096316  
CCCATCAC -0.106613461247  
CCCATCAG -0.0216355981906  
CCCATCCA -0.120158184108  
CCCATCCC -0.217640656397  
CCCATCCG -0.0721561523336  
CCCATCGA 0.0186260640806  
CCCATCGC 0.0631752683439  
CCCATCGG -0.00387669023694  
CCCATCTA -0.0500624591534  
CCCATCTC -0.136963195333  
CCCATGAA -0.101965795623  
CCCATGAC -0.266407106038  
CCCATGAG -0.285129320444  
CCCATGCA -0.290459873944  
CCCATGCC -0.177155872647  
CCCATGCG -0.206982731068  
CCCATGGA -0.243534139945  
CCCATGGC -0.305315700916  
CCCATGGG -0.16074617426  
CCCATGTA -0.112076665426  
CCCATGTC -0.0155360338376  
CCCATTAA 0.0927415018324  
CCCATTAC -0.127300626184  
CCCATTAG 0.209792437065  
CCCATTCA -0.17658079386  
CCCATTCC -0.250457791947  
CCCATTGC -0.010096939502  
CCCATTGA 0.0746487303198  
CCCATTGC -0.202031342379  
CCCATTTA -0.0786365031576  
CCCATTTTC -0.243944693906  
CCCCAAAA -0.22752431908  
CCCCAAAC -0.0381073308462  
CCCCAAAG -0.1141408759  
CCCCAACA -0.129923712949  
CCCCAACC -0.230124669583  
CCCCAACG 0.0170470719619  
CCCCAAGA -0.127032175713

CCCCAAGC -0.316178476848  
CCCCAAGG -0.38179599894  
CCCCAATA -0.0647111371907  
CCCCAATC 0.117587936031  
CCCCACAA -0.257644074524  
CCCCACAC 0.0711625047217  
CCCCACAG -0.228417419876  
CCCCACCA -0.193246144125  
CCCCACCC -0.153953131935  
CCCCACCG -0.0601680073033  
CCCCACGA -0.0714640260095  
CCCCACGC -0.161094382419  
CCCCACGG -0.19745994723  
CCCCACTA -0.256448425005  
CCCCACTC -0.215168029816  
CCCCAGAA -0.305704453613  
CCCCAGAC -0.217701345343  
CCCCAGAG -0.212880462941  
CCCCAGCA -0.15698493432  
CCCCAGCC -0.305461164714  
CCCCAGCG -0.0873172027551  
CCCCAGGA -0.204222944564  
CCCCAGGC -0.276130292855  
CCCCAGGG -0.157976592155  
CCCCAGTA -0.00669547382174  
CCCCAGTC -0.0683423415271  
CCCCATAA -0.0907449686081  
CCCCATAC -0.0750969833825  
CCCCATAG -0.13543745083  
CCCCATCA -0.126434251995  
CCCCATCC -0.138365742234  
CCCCATCG 0.151623909741  
CCCCATGA -0.136458240592  
CCCCATGC -0.233605438801  
CCCCATTA -0.0701499698075  
CCCCATTC -0.156217388576  
CCCCCAA -0.449125911618  
CCCCCAAC -0.148815382791  
CCCCCAAG -0.314264059421  
CCCCCACA -0.159611014873  
CCCCCACC -0.245518301091  
CCCCCACG 0.0354203922542  
CCCCCAGA -0.264576563391  
CCCCCAGC -0.339976519417  
CCCCCAGG -0.312961690369  
CCCCCATA -0.178655427892  
CCCCCATC -0.0395505698536  
CCCCCCAA -0.232997626903  
CCCCCCAC -0.044781077944  
CCCCCCAG -0.208623812241  
CCCCCCCA -0.167029162291  
CCCCCCCC 0.0501004987717  
CCCCCCCCG -0.350040102862  
CCCCCCGA -0.139737292662

CCCCCGC -0.207986789625  
CCCCCGG -0.234264673051  
CCCCCCTA -0.2683466927  
CCCCCCTC -0.24154593249  
CCCCCGAA -0.125999232286  
CCCCCGAC -0.104720534603  
CCCCCGAG -0.0005377011209  
CCCCCGCA -0.24146252472  
CCCCCGCC -0.147892254556  
CCCCCGCG 0.0594119909671  
CCCCCGGA -0.141958153782  
CCCCCGGC -0.170993539726  
CCCCCGGG -0.278873204495  
CCCCCGTA -0.161155046781  
CCCCCGTC -0.331438250625  
CCCCCTAA -0.249142372698  
CCCCCTAC -0.115843896174  
CCCCCTAG -0.247679614514  
CCCCCTCA -0.132435769633  
CCCCCTCC -0.234708888393  
CCCCCTCG -0.14625612061  
CCCCCTGA -0.0832251252319  
CCCCCTGC -0.224268911547  
CCCCCTTA -0.381702215822  
CCCCCTTC -0.219882330053  
CCCCGAAA -0.196588406205  
CCCCGAAC 0.0795354583233  
CCCCGAAG -0.0251643150002  
CCCCGACA -0.177322384036  
CCCCGACC -0.321505847591  
CCCCGACG 0.0519720822751  
CCCCGAGA -0.182976130534  
CCCCGAGC -0.160682827581  
CCCCGAGG -0.326403529804  
CCCCGATA 0.193078889247  
CCCCGATC 0.0325124267352  
CCCCGCAA -0.073613716488  
CCCCGCAC 0.0412782313544  
CCCCGCAG -0.057622944957  
CCCCGCCA -0.157104094496  
CCCCGCCC -0.0510222927917  
CCCCGCCG 0.00667291408486  
CCCCGCGA -0.0272214363123  
CCCCGCGC -0.0528757796888  
CCCCGCGG -0.172707184256  
CCCCGCTA -0.150081664884  
CCCCGCTC -0.0972308379445  
CCCCGGAA -0.272947043208  
CCCCGGAC -0.280418227371  
CCCCGGAG -0.297583510429  
CCCCGGCA -0.159568474687  
CCCCGGCC -0.282554452585  
CCCCGGCG 0.00202524036804  
CCCCGGGA -0.290493952752

CCCCGGGC -0.233914348808  
CCCCGGGG -0.187063356235  
CCCCGGTA -0.153394653149  
CCCCGGTC -0.184786833726  
CCCCGTAA -0.157689406044  
CCCCGTAC -0.0576903150672  
CCCCGTAG -0.252044439839  
CCCCGTCA 0.0102729877717  
CCCCGTCC -0.291190828627  
CCCCGTCCG -0.277074944118  
CCCCGTGA -0.285424805792  
CCCCGTGC -0.248200437243  
CCCCGTTA -0.133977035719  
CCCCGTTC -0.160581624925  
CCCCTAAA -0.109976486935  
CCCCTAAC -0.0857572542501  
CCCCTAAG -0.068543766977  
CCCCTACA -0.242974906262  
CCCCTACC -0.210378056414  
CCCCTACG 0.155429443151  
CCCCTAGA -0.0501736113645  
CCCCTAGC -0.234785561869  
CCCCTAGG -0.244962336384  
CCCCTATA -0.071157683611  
CCCCTATC -0.106475974177  
CCCCTCAA -0.237285353001  
CCCCTCAC 0.039529242459  
CCCCTCAG -0.0912506878046  
CCCCTCCA -0.165603989381  
CCCCTCCC -0.294610068151  
CCCCTCCG -0.237982419145  
CCCCTCGA -0.0299329211769  
CCCCTCGC -0.0784398856424  
CCCCTCGG -0.217872085201  
CCCCTCTA -0.274344577031  
CCCCTCTC -0.151209939324  
CCCCTGAA -0.27954200211  
CCCCTGAC -0.126355492692  
CCCCTGAG -0.258739039264  
CCCCTGCA -0.114106625421  
CCCCTGCC -0.301957833401  
CCCCTGCG -0.245390388659  
CCCCTGGA -0.240990735118  
CCCCTGGC -0.264487247873  
CCCCTGTA 0.00335394115457  
CCCCTGTC -0.266570736266  
CCCCTTAA -0.0575900425919  
CCCCTTAC -0.0171986460035  
CCCCTTAG -0.0342284433194  
CCCCTTCA -0.308667041168  
CCCCTTCC -0.251571728998  
CCCCTTCG -0.159956052924  
CCCCTTGA -0.237463497072  
CCCCTTGC -0.0554949008709

CCCCTTTA -0.0610845070811  
CCCCTTTC -0.40301230749  
CCCGAAAA -0.0153514395939  
CCCGAAAC -0.333501875856  
CCCGAAAG -0.190833862388  
CCCGAACA -0.145285139741  
CCCGAACCC 0.0463424857364  
CCCGAACG -0.0683215269335  
CCCGAAGA -0.00284815448963  
CCCGAAGC -0.221790832486  
CCCGAAGG -0.295616944468  
CCCGAATA 0.15685520231  
CCCGAATC 0.363794924401  
CCCGACAA -0.162814474474  
CCCGACAC -0.177872807562  
CCCGACAG 0.0292122655946  
CCCGACCA -0.357152653457  
CCCGACCC -0.351479817487  
CCCGACCG -0.157434638496  
CCCGACGA -0.0467354406748  
CCCGACGC -0.162149638419  
CCCGACGG -0.272910151433  
CCCGACTA -0.131008008381  
CCCGACTC 0.066890346414  
CCCGAGAA -0.153543198542  
CCCGAGAC -0.098126138942  
CCCGAGAG -0.0823499062833  
CCCGAGCA -0.14932121083  
CCCGAGCC -0.23847421703  
CCCGAGCG -0.104889577242  
CCCGAGGA -0.250127763031  
CCCGAGGC -0.048128113722  
CCCGAGGG -0.359923342802  
CCCGAGTA -0.169367044637  
CCCGAGTC -0.059725772076  
CCCGATAA -0.0797166946402  
CCCGATAC 0.0200489745944  
CCCGATAG 0.0705574168287  
CCCGATCA -0.0059412029109  
CCCGATCC -0.069076417318  
CCCGATCG 0.0798194200127  
CCCGATGA -0.111722434607  
CCCGATGC -0.216213617528  
CCCGATTA 0.213845682211  
CCCGATTC 0.305138471805  
CCCGCAAA -0.0322025289111  
CCCGCAAC -0.0876433272426  
CCCGCAAG 0.0631394932958  
CCCGCACA -0.0392290679766  
CCCGCACC -0.118035051154  
CCCGCACG -0.0378949872795  
CCCGCAGA 0.00201956356407  
CCCGCAGC -0.330864901966  
CCCGCAGG -0.260970950857

CCCGCATA -0.20432756664  
CCCGCATC -0.0403226918378  
CCCGCCAA -0.0770155235042  
CCCGCCAC -0.207997420187  
CCCGCCAG -0.0351287119978  
CCCGCCCA -0.259550378163  
CCCGCCCC -0.260514253742  
CCCGCCCG -0.0534008288047  
CCCGCCGA -0.138379767072  
CCCGCCGC -0.153289566825  
CCCGCCGG -0.137803297194  
CCCGCCTA -0.205083138273  
CCCGCCTC -0.0624426192898  
CCCGCGAA -0.149218824113  
CCCGCGAC -0.19129314195  
CCCGCGAG -0.0830858406616  
CCCGCGCA -0.150660512362  
CCCGCGCC -0.113941498413  
CCCGCGCG -0.0204119617819  
CCCGCGGA -0.139701685573  
CCCGCGGC -0.0817969777425  
CCCGCGGG -0.279549757352  
CCCGCGTA 0.0466847108339  
CCCGCGTC -0.193040426347  
CCCGCTAA -0.231056575961  
CCCGCTAC -0.288421090354  
CCCGCTAG -0.0331070267722  
CCCGCTCA -0.0133480176854  
CCCGCTCC -0.326307809721  
CCCGCTCG -0.341526490796  
CCCGCTGA -0.157386986456  
CCCGCTGC -0.242944956284  
CCCGCTTA 0.118425588123  
CCCGCTTC -0.103958936362  
CCCGGAAA -0.0755899064586  
CCCGGAAC -0.222843871039  
CCCGGAAG 0.0922425056386  
CCCGGACA -0.0911530439326  
CCCGGACC -0.202651589772  
CCCGGACG -0.192814166977  
CCCGGAGA -0.0680470436444  
CCCGGAGC -0.333003257244  
CCCGGAGG -0.328141391239  
CCCGGATA 0.24629450387  
CCCGGATC 0.250747993172  
CCCGGCAA -0.0340129048269  
CCCGGCAC -0.28156513517  
CCCGGCAG -0.153904146027  
CCCGGCCA -0.333263042993  
CCCGGCCC -0.377831645568  
CCCGGCCG -0.123485280859  
CCCGGCGA -0.183018129395  
CCCGGCGC -0.0136018130237  
CCCGGCGG -0.155283724757

CCCGGCTA -0.164540825634  
CCCGGCTC -0.304594799293  
CCCGGGAA -0.0589639321075  
CCCGGGAC -0.323785346707  
CCCGGGAG -0.188731753711  
CCCGGGCA -0.234942532538  
CCCGGGCC -0.334457811402  
CCCGGGCG -0.169475199277  
CCCGGGGA -0.0935855340242  
CCCGGGGC -0.192276836298  
CCCGGGTA -0.208043598496  
CCCGGGTC -0.285180568991  
CCCGGTAA -0.115464111648  
CCCGGTAC -0.327673455213  
CCCGGTAG -0.0492331966657  
CCCGGTCA -0.0464885276675  
CCCGGTCC -0.282992203653  
CCCGGTCCG -0.177578992993  
CCCGGTGA -0.151495350036  
CCCGGTGC -0.329449265381  
CCCGGTTA -0.218125070652  
CCCGTTTC -0.342681127068  
CCCGTAAA -0.145656352203  
CCCGTAAC -0.0735378040753  
CCCGTAAG 0.0131743313561  
CCCGTACA 0.0517123592619  
CCCGTACC 0.0429857578139  
CCCGTACG 0.00750163840629  
CCCGTAGA -0.0827731822276  
CCCGTAGC -0.201467060042  
CCCGTAGG -0.285311847445  
CCCGTATA -0.141374033172  
CCCGTATC 0.192748333978  
CCCGTCAA -0.067110435152  
CCCGTCAC -0.189625429628  
CCCGTCAG -0.0284439987564  
CCCGTCCA -0.163213485191  
CCCGTCCC -0.237142065061  
CCCGTCCG -0.308078869695  
CCCGTCGA -0.049824437331  
CCCGTCGC -0.283311010244  
CCCGTCGG -0.0457834267796  
CCCGTCTA -0.262089070835  
CCCGTCTC -0.01993408098  
CCCGTGAA -0.251464454754  
CCCGTGAC -0.159405082021  
CCCGTGAG -0.0823484328434  
CCCGTGCA -0.225350581347  
CCCGTGCC -0.18808021153  
CCCGTGCG -0.0975100016267  
CCCGTGGA -0.334506749392  
CCCGTGGC -0.0754042095687  
CCCGTGTA 0.0315728952093  
CCCGTGTC -0.104391000798

CCCGTTAA -0.128424195091  
CCCGTTAC -0.261969800322  
CCCGTTAG 0.179318436894  
CCCGTTCA -0.222830026931  
CCCGTTCC -0.365191883733  
CCCGTTCG -0.228050448105  
CCCGTTGA -0.0295051886799  
CCCGTTGC -0.156543382481  
CCCGTTTA -0.200053650731  
CCCGTTTC -0.104786756494  
CCCTAAAA 0.0881446184476  
CCCTAAAC -0.200744104732  
CCCTAAAG -0.0792358180897  
CCCTAACA -0.0326228950676  
CCCTAACC -0.0134198489698  
CCCTAACG -0.0053400507946  
CCCTAAGA -0.342161556409  
CCCTAAGC -0.28654344822  
CCCTAAGG -0.136513017322  
CCCTAATA -0.282624241301  
CCCTAATC 0.189857886324  
CCCTACAA -0.165543799834  
CCCTACAC -0.103250247768  
CCCTACAG -0.0962504718256  
CCCTACCA -0.185519688361  
CCCTACCC -0.247974673426  
CCCTACCG -0.0717367412439  
CCCTACGA 0.163007359977  
CCCTACGC 0.00236012901625  
CCCTACGG -0.126086776689  
CCCTACTA -0.127135771221  
CCCTACTC -0.0999068725979  
CCCTAGAA -0.0919457934294  
CCCTAGAC -0.270745057996  
CCCTAGAG 0.0290059341766  
CCCTAGCA -0.0787807856987  
CCCTAGCC -0.263030588702  
CCCTAGCG -0.115978698203  
CCCTAGGA -0.143939957822  
CCCTAGGC -0.0393633496177  
CCCTAGGG -0.235997222016  
CCCTAGTA -0.0687716076553  
CCCTAGTC -0.104774713895  
CCCTATAA 0.0336714124593  
CCCTATAC -0.165891864021  
CCCTATAG -0.137865229708  
CCCTATCA -0.0213663548155  
CCCTATCC -0.0526055007042  
CCCTATCG 0.103135697758  
CCCTATGA -0.120117317205  
CCCTATGC -0.127060740667  
CCCTATTA -0.0170047371225  
CCCTATTC -0.0118106902769  
CCCTCAA -0.0230980620828



CCCTCAAC -0.119950587593  
CCCTCAAG -0.178903142032  
CCCTCACA -0.00740337727245  
CCCTCACC -0.151702351122  
CCCTCACG -0.0328107981415  
CCCTCAGA -0.0762498850504  
CCCTCAGC -0.171881549891  
CCCTCAGG -0.0968862090546  
CCCTCATA -0.20653486101  
CCCTCATC -0.0519229867849  
CCCTCCAA -0.312828388208  
CCCTCCAC -0.227151659009  
CCCTCCAG -0.264940820415  
CCCTCCCA -0.182464076123  
CCCTCCCC -0.212926902543  
CCCTCCCG -0.159199467615  
CCCTCCGA -0.0512693252599  
CCCTCCGC -0.196833745448  
CCCTCCGG -0.310503399137  
CCCTCCTA -0.0954813289106  
CCCTCCTC -0.294051488162  
CCCTCGAA -0.211898544992  
CCCTCGAC -0.316533802626  
CCCTCGAG 0.0178140541771  
CCCTCGCA -0.157236142106  
CCCTCGCC -0.235580739179  
CCCTCGCG -0.112119146224  
CCCTCGGA -0.0506373363966  
CCCTCGGC -0.222795599331  
CCCTCGTA -0.0428727838077  
CCCTCGTC -0.276104026488  
CCCTCTAA -0.148499524875  
CCCTCTAC -0.29414472143  
CCCTCTAG -0.0703959613639  
CCCTCTCA -0.200878858228  
CCCTCTCC -0.204008499472  
CCCTCTCG -0.0880791164137  
CCCTCTGA -0.240094281107  
CCCTCTGC -0.170574628532  
CCCTCTTA -0.282558568866  
CCCTCTTC -0.18893718319  
CCCTGAAA -0.206002034588  
CCCTGAAC -0.29238616978  
CCCTGAAG -0.112209788012  
CCCTGACA 0.0390670277293  
CCCTGACC -0.160730778668  
CCCTGACG -0.261607602825  
CCCTGAGA -0.298880121649  
CCCTGAGC -0.248310310354  
CCCTGAGG -0.205718901548  
CCCTGATA 0.208187526369  
CCCTGATC -0.0788982723006  
CCCTGCAA -0.115102364296  
CCCTGCAC -0.202306853721

CCCTGCAG -0.115619788005  
CCCTGCCA -0.211949161507  
CCCTGCCC -0.285142575301  
CCCTGCCG -0.135895887949  
CCCTGCGA -0.0273334938739  
CCCTGCGC -0.0499987590281  
CCCTGCGG -0.0737384793888  
CCCTGCTA -0.100862334463  
CCCTGCTC 0.00892754173266  
CCCTGGAA -0.176055197667  
CCCTGGAC -0.18324856304  
CCCTGGAG -0.2911929665  
CCCTGGCA -0.119519094767  
CCCTGGCC -0.258178365402  
CCCTGGCG -0.021435420805  
CCCTGGGA -0.291936430763  
CCCTGGGC -0.275073801196  
CCCTGGTA -0.238134614484  
CCCTGGTC -0.467119169071  
CCCTGTAA -0.0487149916425  
CCCTGTAC -0.286424959003  
CCCTGTAG 0.0139023320842  
CCCTGTCA -0.243759699859  
CCCTGTCC -0.273017315973  
CCCTGTCCG -0.164140500628  
CCCTGTGA -0.321804586983  
CCCTGTGC -0.0871072069613  
CCCTGTTA -0.0970109542283  
CCCTGTTC -0.332860596338  
CCCTTAAA -0.0856213205388  
CCCTTAAC -0.224937143124  
CCCTTAAG -0.0235676447798  
CCCTTACA -0.0365006880158  
CCCTTACC -0.00899388184432  
CCCTTACG 0.0272660392974  
CCCTTAGA 0.00460332034643  
CCCTTAGC -0.148890354762  
CCCTTAGG -0.0904882050434  
CCCTTATA -0.145710282624  
CCCTTATC -0.155655042069  
CCCTTCAA -0.19922754623  
CCCTTCAC -0.312293132481  
CCCTTCAG -0.127684375086  
CCCTTCCA -0.313230531784  
CCCTTCCC -0.297071250796  
CCCTTCCG -0.28930653765  
CCCTTCGA -0.0618432770595  
CCCTTCGC -0.116629308895  
CCCTTCGG -0.257997645846  
CCCTTCTA -0.182375868637  
CCCTTCTC -0.182899492957  
CCCTTGAA -0.219499789098  
CCCTTGAC -0.15475017696  
CCCTTGAG -0.0604866664429

CCCTTGCA -0.0157492901615  
CCCTTGCC -0.2768226087  
CCCTTGCG -0.241820750492  
CCCTTGGA -0.223835737188  
CCCTTGGC -0.215595407715  
CCCTTGTA -0.138274050469  
CCCTTGTC -0.0580261006471  
CCCTTTAA -0.122786918243  
CCCTTTAC -0.0487195076557  
CCCTTTAG 0.0819731577307  
CCCTTTCA -0.240182093329  
CCCTTTCC -0.255392104168  
CCCTTTCCG -0.271020965141  
CCCTTTGA -0.297648825033  
CCCTTTGC -0.0932607131337  
CCCTTTTA -0.127541074909  
CCCTTTTC -0.183541861343  
CCGAAAAA 0.0490638891119  
CCGAAAAC -0.13767384802  
CCGAAAAG -0.0109699371059  
CCGAAACA -0.176159124808  
CCGAAACC -0.181878799156  
CCGAAACG -0.181403322352  
CCGAAAGA 0.00216272636366  
CCGAAAGC -0.179940392987  
CCGAAAGG -0.0868238563632  
CCGAAATA 0.183283834799  
CCGAAATC 0.449919616586  
CCGAACAA 0.0782106961161  
CCGAACAC -0.238421165553  
CCGAACAG -0.0153424053163  
CCGAACCA 0.0841054575447  
CCGAACCC -0.143300527913  
CCGAACCG -0.171767478856  
CCGAACGA -0.152565852045  
CCGAACGC 0.0518135215105  
CCGAACGG -0.192075700561  
CCGAACTA -0.226770332938  
CCGAACTC -0.122257677918  
CCGAAGAA -0.0891815767923  
CCGAAGAC -0.0966656465652  
CCGAAGAG -0.0377952582226  
CCGAAGCA -0.109786357659  
CCGAAGCC -0.247373858382  
CCGAAGCG -0.160387041842  
CCGAAGGA -0.0226162930739  
CCGAAGGC -0.216595549381  
CCGAAGTA -0.0444523112633  
CCGAAGTC -0.0816151842203  
CCGAATAA 0.0823045240611  
CCGAATAC -0.108599158788  
CCGAATAG -0.0263972321774  
CCGAATCA 0.305141229384  
CCGAATCC 0.321879730971

CCGAATCG 0.195610210762  
CCGAATGA -0.124476158363  
CCGAATGC -0.210504624461  
CCGAATTA 0.00214953245256  
CCGAATTC 0.173709945643  
CCGACAAA 0.107554532595  
CCGACAAC -0.126028232089  
CCGACAAG -0.157797529134  
CCGACACA -0.0656373290985  
CCGACACC -0.309068317362  
CCGACACG -0.0593440609414  
CCGACAGA 0.0019114472261  
CCGACAGC -0.109237533784  
CCGACAGG -0.112244868174  
CCGACATA 0.0577493361789  
CCGACATC -0.0173879113273  
CCGACCAA -0.190632456928  
CCGACCAC -0.268146332737  
CCGACCAG -0.233117224992  
CCGACCCA -0.213721647524  
CCGACCCC -0.259175078402  
CCGACCCG -0.346491418438  
CCGACCGA -0.122472585497  
CCGACCGC -0.159114904221  
CCGACCGG -0.249899672092  
CCGACCTA -0.21293332782  
CCGACCTC -0.300461136883  
CCGACGAA -0.122146940329  
CCGACGAC -0.245071765027  
CCGACGAG -0.116779050283  
CCGACGCA -0.0796319570038  
CCGACGCC -0.382734404068  
CCGACGCG -0.0618357227001  
CCGACGGA -0.0895868210073  
CCGACGGC -0.223750519933  
CCGACGTA -0.0431793464377  
CCGACGTC -0.155743377797  
CCGACTAA -0.0600166970493  
CCGACTAC -0.0168418672996  
CCGACTAG -0.123609977946  
CCGACTCA 0.170477288818  
CCGACTCC -0.289879066564  
CCGACTCG -0.179736129658  
CCGACTGA -0.124817722816  
CCGACTGC -0.157417206652  
CCGACTTA -0.171524226734  
CCGACTTC -0.0849571846206  
CCGAGAAA -0.109957064503  
CCGAGAAC -0.321361733326  
CCGAGAAG -0.00241783520187  
CCGAGACA 0.0121654270344  
CCGAGACC -0.343843153743  
CCGAGACG -0.189921824494  
CCGAGAGA 0.165467120013

CCGAGAGC -0.114170837694  
CCGAGAGG -0.0984983196729  
CCGAGATA 0.368878783676  
CCGAGATC 0.336333510945  
CCGAGCAA 0.0532947278224  
CCGAGCAC -0.180682729927  
CCGAGCAG -0.145601040148  
CCGAGCCA -0.173217775793  
CCGAGCCC -0.298572781296  
CCGAGCCG -0.162927818467  
CCGAGCGA -0.022203521208  
CCGAGCGC -0.112070997841  
CCGAGCGG -0.226185486788  
CCGAGCTA -0.0576228853702  
CCGAGCTC -0.104450454474  
CCGAGGAA -0.22954486084  
CCGAGGAC -0.331370814142  
CCGAGGAG -0.224796995839  
CCGAGGCA 0.0220368371424  
CCGAGGCC -0.173412061529  
CCGAGGCG -0.176758860165  
CCGAGGGA -0.250237758537  
CCGAGGGC -0.331529393606  
CCGAGGTA -0.0428112928175  
CCGAGGTC -0.264656187035  
CCGAGTAA 0.0658547623045  
CCGAGTAC -0.097514841193  
CCGAGTAG -0.208599705027  
CCGAGTCA 0.0460115763146  
CCGAGTCC -0.313883858805  
CCGAGTCG -0.108960733554  
CCGAGTGA -0.0669878283563  
CCGAGTGC -0.140104691118  
CCGAGTTA -0.177447728394  
CCGAGTTC -0.162108773543  
CCGATAAA 0.0351908382211  
CCGATAAC -0.193804123967  
CCGATAAG 0.0785347766107  
CCGATACA -0.0691904556835  
CCGATACC 0.192248722552  
CCGATACG 0.210896841675  
CCGATAGA 0.171718550506  
CCGATAGC 0.201501426976  
CCGATAGG 0.177147215754  
CCGATATA 0.239188192959  
CCGATATC 0.450204109487  
CCGATCAA -0.0234221148442  
CCGATCAC 0.098275179647  
CCGATCAG -0.106805844841  
CCGATCCA 0.00835821113406  
CCGATCCC 0.0218220975797  
CCGATCCG -0.00578827207981  
CCGATCGA -0.0857787180187  
CCGATCGC 0.269897009555

CCGATCGG -0.118264500393  
CCGATCTA 0.0250439771392  
CCGATCTC 0.249454688849  
CCGATGAA -0.163231746819  
CCGATGAC -0.221072089449  
CCGATGAG -0.171734051126  
CCGATGCA 0.0903727418879  
CCGATGCC -0.232953873771  
CCGATGCG -0.129494082326  
CCGATGGA -0.138713849271  
CCGATGGC -0.306439653913  
CCGATGTA -0.23804403863  
CCGATGTC -0.0151515151515  
CCGATTAA 0.0598461347562  
CCGATTAC 0.408128888651  
CCGATTAG 0.0253986769138  
CCGATTCA -0.117281193039  
CCGATTCC 0.315501850324  
CCGATTCG 0.224484865295  
CCGATTGA -0.282768720657  
CCGATTGC 0.35620362558  
CCGATTTA 0.04576177164  
CCGATTTC 0.44240418093  
CCGAAAA 0.0694079691686  
CCGAAAC -0.318723887382  
CCGAAAG -0.17063961848  
CCGAAACA 0.0391341795435  
CCGCAACC -0.263764670861  
CCGCAACG -0.0835040108611  
CCGCAAGA 0.0341999810223  
CCGCAAGC -0.0468416074477  
CCGCAAGG -0.40982347251  
CCGCAATA 0.0825660371115  
CCGCAATC 0.468880726456  
CCGCACAA 0.137692789208  
CCGCACAC -0.064173976  
CCGCACAG -0.0529113002622  
CCGCACCA -0.147158091429  
CCGCACCC -0.112747165505  
CCGCACCG -0.0993919588529  
CCGCACGA -0.076798399185  
CCGCACGC -0.0771957973903  
CCGCACGG -0.136065257969  
CCGCACTA -0.192515956337  
CCGCACTC -0.118838826069  
CCGCAGAA -0.0650267353138  
CCGCAGAC -0.1575794921  
CCGCAGAG 0.091117288087  
CCGCAGCA -0.0641020073944  
CCGCAGCC -0.270312570686  
CCGCAGCG -0.115720113328  
CCGCAGGA 0.0474694145966  
CCGCAGGC -0.317322409554  
CCGCAGTA -0.0997924264603

CCGCAGTC -0.0212267662605  
CCGCATAA -0.0901297376294  
CCGCATAC -0.295608263399  
CCGCATAG 0.00760786260155  
CCGCATCA 0.141434823253  
CCGCATCC -0.075273361038  
CCGCATCG -0.0971699604124  
CCGCATGA -0.0892715620352  
CCGCATGC -0.141223173304  
CCGCATTA -0.00235849980863  
CCGCATTC -0.111143790039  
CCGCCAAA 0.142323160807  
CCGCCAAC -0.324136336248  
CCGCCAAG -0.079741659236  
CCGCCACA -0.0657796208635  
CCGCCACC -0.265873311225  
CCGCCACG -0.107490451958  
CCGCCAGA 0.0991388937142  
CCGCCAGC 0.0447690926476  
CCGCCAGG -0.252257925175  
CCGCCATA -0.222296897918  
CCGCCATC -0.0756054528663  
CCGCCCAA -0.223844574012  
CCGCCCAC -0.193230721727  
CCGCCCAG -0.205634232454  
CCGCCCCA -0.115913864243  
CCGCCCCC -0.25088908768  
CCGCCCCG -0.0787765861947  
CCGCCCGA -0.177325144384  
CCGCCCGC -0.0250338064164  
CCGCCCGG -0.155339457937  
CCGCCCTA -0.204247757844  
CCGCCCTC -0.168054195353  
CCGCCGAA 0.100954723619  
CCGCCGAC -0.171987420349  
CCGCCGAG 0.0161884022646  
CCGCCGCA -0.16213796274  
CCGCCGCC -0.207059567817  
CCGCCGCG -0.329821747028  
CCGCCGGA -0.13110826326  
CCGCCGGC -0.262530286867  
CCGCCGTA -0.0854682955376  
CCGCCGTC -0.249906964051  
CCGCCTAA -0.108807154262  
CCGCCTAC -0.169658912684  
CCGCCTAG -0.0995233167579  
CCGCCTCA -0.136338818157  
CCGCCTCC -0.290968184372  
CCGCCTCG -0.25852714253  
CCGCCTGA -0.0640479252019  
CCGCCTGC -0.202901906944  
CCGCCTTA -0.1625854897  
CCGCCTTC 0.0704269249578  
CCGCGAAA 0.0694951149497

CCGCGAAC -0.325138713172  
CCGCGAAG -0.0734349023597  
CCGCGACA -0.107315681068  
CCGCGACC -0.229025318913  
CCGCGACG -0.148970715938  
CCGCGAGA 0.0914426823518  
CCGCGAGC -0.142838896893  
CCGCGAGG -0.336491019168  
CCGCGATA 0.177305404578  
CCGCGATC 0.399571748057  
CCGCGCAA 0.164628816144  
CCGCGCAC -0.0757642180258  
CCGCGCAG -0.0749251587685  
CCGCGCCA -0.0301689316801  
CCGCGCCC -0.159947781831  
CCGCGCCG -0.0965318620355  
CCGCGCGA 0.0332582048875  
CCGCGCGC -0.0764927742269  
CCGCGCGG -0.0149951628507  
CCGCGCTA -0.179581118215  
CCGCGCTC -0.183065368037  
CCGCGGAA -0.184260068679  
CCGCGGAC -0.211921597817  
CCGCGGAG 0.00299466120813  
CCGCGGCA 0.123252045576  
CCGCGGCC -0.226684461464  
CCGCGGCG 0.133245987314  
CCGCGGGA -0.162755698327  
CCGCGGGC -0.104793233083  
CCGCGGTA -0.00797629585508  
CCGCGGTC -0.313868009559  
CCGCGTAA 0.0335108140906  
CCGCGTAC -0.0301554998525  
CCGCGTAG -0.128819603075  
CCGCGTCA -0.190791499846  
CCGCGTCC -0.295965360661  
CCGCGTCG -0.189210650388  
CCGCGTGA -0.0934581825983  
CCGCGTGC -0.129513845815  
CCGCGTTA -0.258937653509  
CCGCGTTC 0.0174745249846  
CCGCTAAA -0.0756215978711  
CCGCTAAC -0.17503829924  
CCGCTAAG -0.0152410947201  
CCGCTACA -0.234677557048  
CCGCTACC -0.344296123952  
CCGCTACG -0.140794821836  
CCGCTAGA 0.232362065064  
CCGCTAGC -0.13516422572  
CCGCTAGG -0.108926597589  
CCGCTATA -0.137086804152  
CCGCTATC 0.157560783341  
CCGCTCAA 0.00141601656753  
CCGCTCAC -0.171012938112



CCGCTCAG 0.0182643869271  
CCGCTCCA -0.137436127219  
CCGCTCCC -0.146225891503  
CCGCTCCG -0.191532763815  
CCGCTCGA -0.187201393886  
CCGCTCGC -0.0716780951278  
CCGCTCTA -0.269332681603  
CCGCTCTC 0.0465548220231  
CCGCTGAA -0.177351222727  
CCGCTGAC -0.31320870074  
CCGCTGAG -0.153084826881  
CCGCTGCA -0.148935875186  
CCGCTGCC -0.31953297892  
CCGCTGCG -0.133301353359  
CCGCTGGA -0.293933034548  
CCGCTGGC -0.283599740281  
CCGCTGTA -0.272294320492  
CCGCTGTC -0.0442771326175  
CCGCTTAA -0.0282812306165  
CCGCTTAC 0.0458610040527  
CCGCTTAG -0.173585822687  
CCGCTTCA -0.124615595686  
CCGCTTCC -0.259869881046  
CCGCTTCG -0.272011213377  
CCGCTTGA -0.160547941607  
CCGCTTGC -0.231473729255  
CCGCTTTA -0.154395569559  
CCGCTTTC -0.0842314807922  
CCGGAAAA 0.131264873689  
CCGGAAAC -0.00573766649848  
CCGGAAAG -0.120105762957  
CCGGAAACA -0.0517167385107  
CCGGAAACC -0.189026457915  
CCGGAAACG -0.122749806996  
CCGGAAAGA -0.100700906878  
CCGGAAAGC -0.183015294011  
CCGGAAAGG -0.130233272136  
CCGGAATA 0.210435537908  
CCGGAATC 0.401418217119  
CCGGACAA 0.0407954570338  
CCGGACAC -0.307207741251  
CCGGACAG -0.0172235180268  
CCGGACCA -0.099654674663  
CCGGACCC -0.195457103572  
CCGGACCG -0.189598337454  
CCGGACGA -0.128986322369  
CCGGACGC -0.166583477455  
CCGGACGG -0.277568264208  
CCGGACTA -0.202238804881  
CCGGACTC -0.172851759036  
CCGGAGAA -0.129263020123  
CCGGAGAC -0.281457156573  
CCGGAGAG -0.067172369506  
CCGGAGCA -0.13584661975

CCGGAGCC -0.365291097464  
CCGGAGCG -0.155798014676  
CCGGAGGA -0.0893123220459  
CCGGAGGC -0.261762881739  
CCGGAGTA -0.117821724854  
CCGGAGTC -0.123883219946  
CCGGATAA 0.0888808919112  
CCGGATAC 0.2774027471  
CCGGATAG 0.0967834007595  
CCGGATCA 0.17891214061  
CCGGATCC 0.286433873711  
CCGGATCG 0.239302059079  
CCGGATGA 0.0354817047802  
CCGGATGC -0.137999057095  
CCGGATTA 0.397710382559  
CCGGATTC 0.447300667543  
CCGGCAAA 0.091052723019  
CCGGCAAC -0.276726126975  
CCGGCAAG -0.17862110233  
CCGGCACA 0.077685160179  
CCGGCACC -0.410870817247  
CCGGCACG -0.271393591298  
CCGGCAGA 0.121768661804  
CCGGCAGC -0.34805271569  
CCGGCAGG -0.104279187999  
CCGGCATA -0.062612121451  
CCGGCATC 0.113494595009  
CCGGCCAA -0.201605143517  
CCGGCCAC -0.32341559084  
CCGGCCAG -0.201340739238  
CCGGCCCA -0.240730633633  
CCGGCCCC -0.244082406349  
CCGGCCCG -0.338107326646  
CCGGCCGA -0.225163828444  
CCGGCCGC -0.0398743093217  
CCGGCCGG -0.0221668223926  
CCGGCCTA -0.203227798036  
CCGGCCTC -0.0874308982799  
CCGGCGAA 0.0688065224849  
CCGGCGAC -0.0817316182856  
CCGGCGAG -0.25767601307  
CCGGCGCA -0.0624102152628  
CCGGCGCC -0.314155237149  
CCGGCGCG -0.0720163651704  
CCGGCGGA -0.183617590093  
CCGGCGGC -0.235875712399  
CCGGCGTA 0.0307911217002  
CCGGCGTC -0.305937955603  
CCGGCTAA -0.302489636243  
CCGGCTAC -0.33663260139  
CCGGCTAG -0.210888629741  
CCGGCTCA -0.285295504203  
CCGGCTCC -0.288837377624  
CCGGCTCG -0.241408770489

CCGGCTGA -0.230458437375  
CCGGCTGC -0.216018755117  
CCGGCTTA -0.179337839396  
CCGGCTTC -0.228113487699  
CCGGGAAA 0.0442120036507  
CCGGGAAC -0.251070042743  
CCGGGAAG -0.227770619027  
CCGGGACA -0.11967667844  
CCGGGACC -0.385452235478  
CCGGGACG -0.312768584904  
CCGGGAGA 0.0703899491778  
CCGGGAGC -0.200343371519  
CCGGGAGG -0.176028599858  
CCGGGATA 0.168056903863  
CCGGGATC 0.194463058099  
CCGGGCAA -0.0317624623664  
CCGGGCAC -0.27966457849  
CCGGGCAG -0.209114735725  
CCGGGCCA -0.249355046759  
CCGGGCCC -0.250613353946  
CCGGGCCG -0.409943383648  
CCGGGCGA -0.154752747934  
CCGGGCGC -0.160154020792  
CCGGGCTA -0.101250111278  
CCGGGCTC -0.183078620625  
CCGGGGAA -0.141508222275  
CCGGGGAC -0.205041745778  
CCGGGGAG -0.271504642836  
CCGGGGCA 0.0208612496588  
CCGGGGCC -0.355974478758  
CCGGGGCG -0.178319480627  
CCGGGGGA -0.123957902051  
CCGGGGGC -0.313190602595  
CCGGGGTA -0.0681998042216  
CCGGGGTC -0.16711881977  
CCGGGTAA -0.227440034443  
CCGGGTAC -0.149047993272  
CCGGGTAG -0.124728114791  
CCGGGTCA -0.157340556038  
CCGGGTCC -0.282155233419  
CCGGGTCCG -0.31910834531  
CCGGGTGA -0.0155550495341  
CCGGGTGC -0.31041454762  
CCGGGTTA -0.309085747204  
CCGGGTTC -0.0181713278904  
CCGGTAAA 0.0357656897536  
CCGGTAAC -0.123461988065  
CCGGTAAG -0.161410404422  
CCGGTACA -0.181122847372  
CCGGTACC -0.277741947042  
CCGGTACG -0.31105704343  
CCGGTAGA 0.0804004291877  
CCGGTAGC -0.231640537792  
CCGGTAGG 0.169122920229

CCGGTATA -0.0303926516048  
CCGGTATC 0.326460068884  
CCGGTCAA -0.184503124129  
CCGGTCAC -0.260919147744  
CCGGTCAG -0.0219098350938  
CCGGTCCA -0.129923064236  
CCGGTCCC -0.161816881572  
CCGGTCCG -0.285846621465  
CCGGTCGA -0.0683467203412  
CCGGTCGC -0.212289132047  
CCGGTCTA -0.237501769771  
CCGGTCTC 0.0641022459362  
CCGGTGAA -0.19350631805  
CCGGTGAC -0.324346668729  
CCGGTGAG -0.155644218433  
CCGGTGCA 0.0068892882115  
CCGGTGCC -0.276556655393  
CCGGTGCG -0.131159919129  
CCGGTGGA -0.056698969322  
CCGGTGGC -0.439158482752  
CCGGTGTA -0.0504423875972  
CCGGTGTC -0.0188053436396  
CCGGTTAA -0.135153059395  
CCGGTTAC -0.0749362341619  
CCGGTTAG -0.151156340641  
CCGGTTCA -0.107710120774  
CCGGTTCC -0.362065745918  
CCGGTTCCG -0.420260497741  
CCGGTTGA -0.182306701848  
CCGGTTGC -0.305264057379  
CCGGTTTA -0.256005446164  
CCGGTTTC -0.0630811004139  
CCGTAAAA 0.00679330967566  
CCGTAAAC -0.301949354714  
CCGTAAAG -0.074338762197  
CCGTAAACA 0.0223460374976  
CCGTAAACC 0.0175022762038  
CCGTAAACG 0.0383633935023  
CCGTAAAGA 0.142419509062  
CCGTAAAGC -0.151547980362  
CCGTAAAGG -0.00905912488661  
CCGTAAATA 0.291125741772  
CCGTAAATC 0.455652622319  
CCGTACAA 0.0772549408913  
CCGTACAC -0.143055658949  
CCGTACAG -0.0797149095601  
CCGTACCA 0.128148288724  
CCGTACCC -0.178224946034  
CCGTACCG -0.165609397701  
CCGTACGA -0.100145077508  
CCGTACGC 0.0287766114379  
CCGTACGG -0.150446368279  
CCGTACTA -0.0356311403746  
CCGTACTC -0.029784019328

CCGTAGAA 0.0144924538864  
CCGTAGAC -0.227147948529  
CCGTAGAG -0.192570619614  
CCGTAGCA -0.0685717756187  
CCGTAGCC -0.230566666618  
CCGTAGCG -0.226536333639  
CCGTAGGA -0.117381150287  
CCGTAGGC -0.35224294391  
CCGTAGTA -0.16491270834  
CCGTAGTC -0.0695601846784  
CCGTATAA 0.0840996182565  
CCGTATAC -0.140993610691  
CCGTATAG 0.0113653598502  
CCGTATCA 0.198784183633  
CCGTATCC 0.285965028389  
CCGTATCG 0.153680576338  
CCGTATGA -0.18181493088  
CCGTATGC -0.073388641965  
CCGTATTA -0.0882265351854  
CCGTATTC 0.2035244611  
CCGTCAAA -0.0577191740327  
CCGTCAAC -0.239291749017  
CCGTCAAG -0.0802772469439  
CCGTCACA -0.0795301319436  
CCGTCACC -0.160076870414  
CCGTCACG -0.382926309739  
CCGTCAGA -0.0660820890378  
CCGTCAGC -0.228076000765  
CCGTCAGG -0.117732514066  
CCGTCATA 0.0131058143286  
CCGTCATC -0.0593316543014  
CCGTCCAA -0.0467807274293  
CCGTCCAC -0.298048588197  
CCGTCCAG -0.0481794848467  
CCGTCCCA -0.12933370829  
CCGTCCCC -0.131184058534  
CCGTCCCG -0.161668751158  
CCGTCCGA -0.0704028823765  
CCGTCCGC -0.128436990912  
CCGTCCCTA -0.0499917528241  
CCGTCCCTC -0.198716093484  
CCGTTCGAA -0.105433820549  
CCGTTCGAC -0.205787478635  
CCGTTCGAG -0.173542182038  
CCGTTCGCA -0.171828545824  
CCGTTCGCC -0.293994359408  
CCGTTCGCG -0.161820538533  
CCGTTCGGA 0.0165190763038  
CCGTTCGGC -0.0727862278851  
CCGTTCGTA -0.128125594514  
CCGTTCGTC -0.110060386844  
CCGTCTAA -0.0606474865302  
CCGTCTAC -0.266449245555  
CCGTCTAG -0.266990585673

CCGTCTCA 0.0476414077756  
CCGTCTCC -0.3208810178  
CCGTCTCG -0.221488178532  
CCGTCTGA -0.207371474102  
CCGTCTGC -0.214581868806  
CCGTCTTA -0.0873855586774  
CCGTCTTC -0.232516311494  
CCGTGAAA 0.0950882011488  
CCGTGAAC -0.103444425143  
CCGTGAAG -0.157208914682  
CCGTGACA -0.154952795077  
CCGTGACC -0.350175593714  
CCGTGACG -0.0656748641338  
CCGTGAGA -0.021119245564  
CCGTGAGC -0.135143965524  
CCGTGAGG -0.233239573771  
CCGTGATA 0.210156711897  
CCGTGATC 0.174214159063  
CCGTGCAA 0.0120244211153  
CCGTGCAC -0.257330869037  
CCGTGCAG -0.144903094354  
CCGTGCCA -0.0313999436537  
CCGTGCCC -0.132935688357  
CCGTGCCG -0.193500897369  
CCGTGCGA -0.0745339847063  
CCGTGCGC 0.00688379086589  
CCGTGCTA -0.0378403588648  
CCGTGCTC -0.131815415066  
CCGTGGAA -0.225846773075  
CCGTGGAC -0.27025633816  
CCGTGGAG -0.313629924029  
CCGTGGCA -0.19310687532  
CCGTGGCC -0.255135074793  
CCGTGGCG 0.0541243723062  
CCGTGGGA -0.1839051943  
CCGTGGGC -0.245304319778  
CCGTGGTA -0.0525167040319  
CCGTGGTC -0.30835896609  
CCGTGTAA -0.0800514513074  
CCGTGTAC -0.0938597579692  
CCGTGTAG 0.149260490855  
CCGTGTCA -0.000876623139639  
CCGTGTCC -0.273566843195  
CCGTGTCTG -0.174266292887  
CCGTGTGA 0.0594665810238  
CCGTGTGC -0.194008165921  
CCGTGTTA -0.0462024309463  
CCGTGTTC -0.15041185559  
CCGTTAAA 0.0509237024007  
CCGTTAAC -0.178948636161  
CCGTTAAG -0.0036448122689  
CCGTTACA -0.19151839996  
CCGTTACC -0.0954281221553  
CCGTTACG -0.201106177005

CCGTTAGA 0.0691067354306  
CCGTTAGC -0.111605515912  
CCGTTAGG 0.0572873148631  
CCGTTATA 0.0878951555805  
CCGTTATC 0.115248857673  
CCGTTCAA -0.0216762487764  
CCGTTCAC -0.178238902811  
CCGTTCAG 0.0720998810245  
CCGTTCCA -0.0165046587908  
CCGTTCCC -0.222091918424  
CCGTTCCG -0.216263490882  
CCGTTCGA 0.0112429102801  
CCGTTCGC -0.144982036491  
CCGTTCTA 0.00533054020715  
CCGTTCTC 0.0709125103064  
CCGTTGAA 0.0876212869444  
CCGTTGAC -0.144485412716  
CCGTTGAG -0.0331657058413  
CCGTTGCA -0.171880212512  
CCGTTGCC -0.361768281382  
CCGTTGCG -0.0101713283531  
CCGTTGGA -0.128955995026  
CCGTTGGC -0.370129673267  
CCGTTGTA -0.0494452099973  
CCGTTGTC 0.126085688761  
CCGTTTAA 0.111652975289  
CCGTTTAC -0.0520936879181  
CCGTTTAG -0.0320934578075  
CCGTTTCA -0.139711214229  
CCGTTTCC -0.181759681941  
CCGTTTCG -0.187253061146  
CCGTTTGA -0.0537796828863  
CCGTTTGC 0.00628849080139  
CCGTTTTA -0.0108501273695  
CCGTTTTC -0.0129233917113  
CCTAAAAA -0.0502653226572  
CCTAAAAC -0.109563695444  
CCTAAAAG 0.125871050113  
CCTAAACA -0.0802582491666  
CCTAAACC -0.180632444527  
CCTAAACG -0.0951991068106  
CCTAAAGA 0.0839255233195  
CCTAAAGC -0.259203718704  
CCTAAAGG -0.095496322769  
CCTAAATA 0.180920855748  
CCTAAATC 0.228430910249  
CCTAACAA -0.0268163299268  
CCTAACAC -0.18004826183  
CCTAACAG 0.0801961780677  
CCTAACCA -0.224008504888  
CCTAACCC -0.16176377345  
CCTAACCG -0.030973707499  
CCTAACGA 0.0142617314949  
CCTAACGC -0.0839046996777

CCTAACTA -0.130011785138  
CCTAACTC -0.179132045345  
CCTAAGAA 0.00274373553864  
CCTAAGAC -0.233616148586  
CCTAAGAG -0.0257452376747  
CCTAAGCA -0.243576806751  
CCTAAGCC -0.148260957567  
CCTAAGCG -0.202750507502  
CCTAAGGA -0.163978027614  
CCTAAGGC -0.225054768949  
CCTAAGTA -0.252093275877  
CCTAAGTC -0.0842809374922  
CCTAATAA -0.0205646615082  
CCTAATAC -0.150217094653  
CCTAATAG 0.108242155281  
CCTAATCA 0.06891878104  
CCTAATCC 0.0117314467906  
CCTAATCG 0.080099014815  
CCTAATGA -0.00219922191485  
CCTAATGC -0.146850089697  
CCTAATTA -0.00412395866941  
CCTAATTC -0.0414450262935  
CCTACAAA -0.0499496526621  
CCTACAAC -0.175382415701  
CCTACAAG -0.0179614888862  
CCTACACA 0.0890656496717  
CCTACACC -0.258952659571  
CCTACACG 0.0441917293507  
CCTACAGA 0.067615307694  
CCTACAGC -0.155276557852  
CCTACAGG -0.0212148639081  
CCTACATA 0.074257498011  
CCTACATC 0.0621789463235  
CCTACCAA -0.107534643507  
CCTACCAC 0.0879736485797  
CCTACCAG -0.227681438664  
CCTACCCA -0.146322902967  
CCTACCCC -0.194893106728  
CCTACCCG -0.203004726487  
CCTACCGA -0.0369849456024  
CCTACCGC -0.0953670849083  
CCTACCTA -0.124572497055  
CCTACCTC -0.317603133441  
CCTACGAA 0.040611600557  
CCTACGAC -0.19020425019  
CCTACGAG 0.0700001021825  
CCTACGCA -0.176408570424  
CCTACGCC -0.288795444083  
CCTACGCG 0.0957484428121  
CCTACGGA -0.0278454506622  
CCTACGGC -0.293013754146  
CCTACGTA -0.0686751314009  
CCTACGTC -0.18704461812  
CCTACTAA -0.0516634266727



CCTACTAC -0.183102454893  
CCTACTAG -0.139055016502  
CCTACTCA -0.0805475561109  
CCTACTCC -0.207921218357  
CCTACTCG -0.142745477555  
CCTACTGA -0.345533698807  
CCTACTGC -0.166651587078  
CCTACTTA -0.0649482128129  
CCTACTTC -0.256852139163  
CCTAGAAA 0.0358526570648  
CCTAGAAC -0.121980946078  
CCTAGAAG 0.0126926226457  
CCTAGACA -0.12485618806  
CCTAGACC -0.326120688467  
CCTAGACG -0.173848798705  
CCTAGAGA 0.000615314993102  
CCTAGAGC -0.17733892376  
CCTAGAGG -0.20334325766  
CCTAGATA 0.301647377405  
CCTAGATC 0.105296756812  
CCTAGCAA -0.0832554356068  
CCTAGCAC -0.180051195311  
CCTAGCAG -0.108357481551  
CCTAGCCA 0.00736687100323  
CCTAGCCC -0.224511709327  
CCTAGCCG -0.17052218335  
CCTAGCGA 0.0376987573444  
CCTAGCGC -0.202908917501  
CCTAGCTA -0.20016159428  
CCTAGCTC 0.000828652343804  
CCTAGGAA -0.210345521563  
CCTAGGAC -0.203710134861  
CCTAGGAG -0.15182956106  
CCTAGGCA -0.109375387746  
CCTAGGCC -0.224278661275  
CCTAGGCG 0.0973431238732  
CCTAGGGA -0.19344310197  
CCTAGGGC -0.227697977568  
CCTAGGTA -0.182352016806  
CCTAGGTC -0.33036158573  
CCTAGTAA 0.0675957409843  
CCTAGTAC -0.232031657032  
CCTAGTAG -0.118714918651  
CCTAGTCA -0.0403765926882  
CCTAGTCC -0.163100277694  
CCTAGTCG -0.095758843528  
CCTAGTGA -0.19025162969  
CCTAGTGC -0.12686035633  
CCTAGTTA 0.07890419269  
CCTAGTTC -0.135594271958  
CCTATAAA -0.00910418020043  
CCTATAAC -0.0191678315701  
CCTATAAG 0.0663887324974  
CCTATACA -0.0580578527478

CCTATACC -0.213151111662  
CCTATACG 0.130898115747  
CCTATAGA -0.0433224089983  
CCTATAGC -0.167579270277  
CCTATAGG 0.042495982624  
CCTATATA 0.0627424216988  
CCTATATC 0.308908081635  
CCTATCAA 0.165767696071  
CCTATCAC -0.148099573336  
CCTATCAG 0.0410348678496  
CCTATCCA 0.0646004130853  
CCTATCCC -0.112306956805  
CCTATCCG -0.132394335134  
CCTATCGA -0.119977317743  
CCTATCGC -0.0799742467733  
CCTATCTA -0.0881361073196  
CCTATCTC -0.0439209360379  
CCTATGAA -0.182523535817  
CCTATGAC -0.232335062793  
CCTATGAG -0.136634326692  
CCTATGCA -0.101940757281  
CCTATGCC -0.0367707276483  
CCTATGCG -0.129502364562  
CCTATGGA -0.0589833402658  
CCTATGGC -0.200924567817  
CCTATGTA 0.00986133838601  
CCTATGTC 0.000605288484076  
CCTATTAA 0.124101662007  
CCTATTAC -0.134800698115  
CCTATTAG 0.0299927738809  
CCTATTCA -0.203167622904  
CCTATTCC -0.15339350797  
CCTATTCCG -0.0561425662212  
CCTATTGA -0.170781331415  
CCTATTGC -0.212878539597  
CCTATTTA 0.0117333197083  
CCTATTTTC -0.0555776139939  
CCTCAAAA -0.102283357583  
CCTCAAAC -0.188125267061  
CCTCAAAG 0.0381993563812  
CCTCAACA -0.0627983455251  
CCTCAACC -0.245530990822  
CCTCAACG -0.0259365875044  
CCTCAAGA 0.0310434401343  
CCTCAAGC -0.239836235668  
CCTCAAGG -0.189258551727  
CCTCAATA 0.215191638139  
CCTCAATC 0.0708561126399  
CCTCACAA -0.00984868944476  
CCTCACAC -0.110542785459  
CCTCACAG -0.0931551332852  
CCTCACCA 0.0488429869082  
CCTCACCC -0.281183474258  
CCTCACCG -0.20480521812

CCTCACGA -0.0723243905062  
CCTCACGC -0.127128887345  
CCTCACTA -0.27866200441  
CCTCACTC -0.154904101113  
CCTCAGAA -0.0504165188744  
CCTCAGAC -0.274029593972  
CCTCAGAG 0.0232688335292  
CCTCAGCA -0.149955202691  
CCTCAGCC -0.402494949745  
CCTCAGCG -0.105470055532  
CCTCAGGA -0.00753887678108  
CCTCAGGC -0.152861635909  
CCTCAGTA -0.123150468534  
CCTCAGTC -0.153982501076  
CCTCATAA -0.00233936483143  
CCTCATAC -0.154778348483  
CCTCATAG -0.0762760005184  
CCTCATCA 0.211831127786  
CCTCATCC -0.117919248086  
CCTCATCG -0.184117807607  
CCTCATGA -0.0750047568229  
CCTCATGC -0.340804041707  
CCTCATT A -0.0378794772734  
CCTCATTC -0.100092737116  
CCTCCAAA -0.155331863025  
CCTCCAAC -0.169923371368  
CCTCCAAG -0.102817468832  
CCTCCACA -0.168037517932  
CCTCCACC -0.330177061523  
CCTCCACG -0.15285748797  
CCTCCAGA -0.0916648055783  
CCTCCAGC -0.190131170875  
CCTCCAGG -0.378635713108  
CCTCCATA 0.107894395773  
CCTCCATC -0.181928238359  
CCTCCCAA -0.0859979421616  
CCTCCCAC -0.289971252725  
CCTCCCAG 0.00756265907781  
CCTCCCCA -0.242405335785  
CCTCCCCC -0.264279275927  
CCTCCCCG -0.274373422704  
CCTCCCGA -0.20476154339  
CCTCCCGC -0.165249348716  
CCTCCCTA -0.310736866374  
CCTCCCTC -0.220929367107  
CCTCCGAA -0.118459328845  
CCTCCGAC -0.162691873762  
CCTCCGAG -0.155018565841  
CCTCCGCA -0.249953671345  
CCTCCGCC -0.329949945803  
CCTCCGCG -0.132315583111  
CCTCCGGA -0.138619415843  
CCTCCGGC -0.208122179242  
CCTCCGTA -0.197166996389

CCTCCGTC -0.196623080168  
CCTCCTAA -0.207631428784  
CCTCCTAC -0.192493932597  
CCTCCTAG -0.0853109120436  
CCTCCTCA -0.134269481728  
CCTCCTCC -0.237171526429  
CCTCCTCG -0.290491978875  
CCTCCTGA -0.142438022303  
CCTCCTGC -0.114702144143  
CCTCCTTA -0.28271561695  
CCTCCTTC -0.155089035689  
CCTCGAAA 0.0636270738597  
CCTCGAAC -0.200368787205  
CCTCGAAG -0.200529842412  
CCTCGACA -0.0931385930058  
CCTCGACC -0.36364637885  
CCTCGACG -0.172284127644  
CCTCGAGA 0.0287215590246  
CCTCGAGC -0.258755959773  
CCTCGAGG 0.0615744300846  
CCTCGATA 0.184915920886  
CCTCGATC -0.0138673086947  
CCTCGCAA -0.208721002357  
CCTCGCAC -0.171238635153  
CCTCGCAG -0.116529731418  
CCTCGCCA -0.00437727641001  
CCTCGCCC -0.364060798986  
CCTCGCCG -0.233943655601  
CCTCGCGA 0.0525090691445  
CCTCGCGC -0.130968141208  
CCTCGCTA -0.211315111166  
CCTCGCTC -0.189394481271  
CCTCGGAA -0.00996644983342  
CCTCGGAC -0.294347443569  
CCTCGGAG -0.0843629628224  
CCTCGGCA -0.35735691781  
CCTCGGCC -0.0112440263955  
CCTCGGCG 0.00792902345204  
CCTCGGGA -0.209693246123  
CCTCGGGC -0.307809770896  
CCTCGGTA -0.279077524444  
CCTCGGTC -0.292692696637  
CCTCGTAA -0.0392782122155  
CCTCGTAC -0.158750244674  
CCTCGTAG 0.0498473680292  
CCTCGTCA -0.0750631675286  
CCTCGTCC -0.204308977145  
CCTCGTCG -0.139438281868  
CCTCGTGA -0.268624872857  
CCTCGTGC -0.20582397165  
CCTCGTTA -0.220323160898  
CCTCGTTC -0.235198518283  
CCTCTAAA -0.0945422006028  
CCTCTAAC -0.0334377540877

CCTCTAAG -0.0778501200704  
CCTCTACA -0.253999751953  
CCTCTACC -0.284657279014  
CCTCTACG -0.302574811507  
CCTCTAGA 0.0296674084553  
CCTCTAGC -0.214600409695  
CCTCTATA -0.0198132016314  
CCTCTATC 0.102467099261  
CCTCTCAA -0.044651550473  
CCTCTCAC -0.165918095569  
CCTCTCAG -0.0958113502193  
CCTCTCCA -0.119938622395  
CCTCTCCC -0.151714271162  
CCTCTCCG -0.104690061023  
CCTCTCGA -0.229443284347  
CCTCTCGC -0.295263825273  
CCTCTCTA -0.102963679827  
CCTCTCTC -0.231261100466  
CCTCTGAA -0.0822186375481  
CCTCTGAC -0.244725302287  
CCTCTGAG -0.054087136778  
CCTCTGCA -0.248448004267  
CCTCTGCC -0.0502654037584  
CCTCTGCG -0.0355076790127  
CCTCTGGA -0.157670434967  
CCTCTGGC -0.26632458701  
CCTCTGTA -0.114561535556  
CCTCTGTC -0.260263727412  
CCTCTTAA 0.0816150011314  
CCTCTTAC -0.0457607164225  
CCTCTTAG 0.0562045561704  
CCTCTTCA -0.257760576465  
CCTCTTCC -0.357404048614  
CCTCTTCG -0.162260930939  
CCTCTTGA -0.125418724101  
CCTCTTGC -0.166613992862  
CCTCTTTA -0.171183957246  
CCTCTTTC -0.264148368689  
CCTGAAAA -0.117828761575  
CCTGAAAC 0.0581118661635  
CCTGAAAG -0.0812342308806  
CCTGAACA -0.171341062043  
CCTGAACC -0.270118213245  
CCTGAACG -0.179742129837  
CCTGAAGA 0.225052876568  
CCTGAAGC -0.241766254531  
CCTGAAGG -0.32076296226  
CCTGAATA -0.0932452799762  
CCTGAATC 0.102227688445  
CCTGACAA 0.119990803121  
CCTGACAC -0.0704686818023  
CCTGACAG -0.0274078268878  
CCTGACCA -0.137998672687  
CCTGACCC -0.353852337869

CCTGACCG -0.177092080125  
CCTGACGA 0.0512923391711  
CCTGACGC -0.154455366069  
CCTGACTA -0.293311415509  
CCTGACTC -0.26892938652  
CCTGAGAA -0.0298336532777  
CCTGAGAC -0.342707670087  
CCTGAGAG -0.226912845112  
CCTGAGCA -0.174492111147  
CCTGAGCC -0.207086872496  
CCTGAGCG -0.122332887203  
CCTGAGGA 0.0178812026585  
CCTGAGGC -0.124043776464  
CCTGAGTA -0.0781819986599  
CCTGAGTC -0.224401581416  
CCTGATAA 0.031619015642  
CCTGATAC 0.21394421374  
CCTGATAG -0.0282804026189  
CCTGATCA -0.100414147179  
CCTGATCC -0.00163281096034  
CCTGATCG 0.0977685674655  
CCTGATGA 0.0246017367229  
CCTGATGC -0.142324164134  
CCTGATTA 0.249733204279  
CCTGATTC 0.399888835041  
CCTGCAAA 0.0749109439355  
CCTGCAAC -0.0312335415202  
CCTGCAAG -0.309627287043  
CCTGCACA -0.0759202353233  
CCTGCACC -0.165347237727  
CCTGCACG -0.113216428727  
CCTGCAGA -0.0408226286288  
CCTGCAGC 0.0867157702059  
CCTGCAGG -0.194137876871  
CCTGCATA -0.071621883982  
CCTGCATC -0.182599549501  
CCTGCCAA -0.322983709173  
CCTGCCAC -0.183706810267  
CCTGCCAG -0.143338984686  
CCTGCCCA -0.178386034246  
CCTGCCCC -0.37230804919  
CCTGCCCG -0.10527861178  
CCTGCCGA -0.0433741942647  
CCTGCCGC -0.322409929465  
CCTGCCTA -0.219788126132  
CCTGCCTC -0.18216438832  
CCTGCGAA 0.0043228338756  
CCTGCGAC -0.190703020981  
CCTGCGAG -0.0349750326051  
CCTGCGCA 0.0150500354007  
CCTGCGCC -0.291015856479  
CCTGCGCG -0.0677890265177  
CCTGCGGA 0.134693649651  
CCTGCGGC -0.311613145295

CCTGCGTA -0.135062836513  
CCTGCGTC -0.20919094843  
CCTGCTAA -0.16343688201  
CCTGCTAC -0.129594334074  
CCTGCTAG -0.218553585318  
CCTGCTCA 0.0269374474363  
CCTGCTCC -0.251193086042  
CCTGCTCG -0.100868378613  
CCTGCTGA -0.116063476307  
CCTGCTGC -0.249091896168  
CCTGCTTA -0.181466553229  
CCTGCTTC -0.248564256369  
CCTGGAAA 0.0949751404297  
CCTGGAAC -0.188643249606  
CCTGGAAG -0.332937674636  
CCTGGACA -0.137632696313  
CCTGGACC -0.18515115646  
CCTGGACG -0.130911073514  
CCTGGAGA 0.073156792187  
CCTGGAGC -0.227157302994  
CCTGGATA 0.250916205462  
CCTGGATC 0.144451581352  
CCTGGCAA 0.134016356504  
CCTGGCAC -0.162000623058  
CCTGGCAG -0.136043733425  
CCTGGCCA -0.0696096551094  
CCTGGCCC -0.222713881524  
CCTGGCCG -0.284466444397  
CCTGGCGA 0.0663686196653  
CCTGGCGC 0.0558078614661  
CCTGGCTA -0.302101163454  
CCTGGCTC -0.133693090187  
CCTGGGAA -0.214289258864  
CCTGGGAC -0.175263089694  
CCTGGGAG -0.181653669845  
CCTGGGCA -0.320243361307  
CCTGGGCC -0.170524557356  
CCTGGGCG -0.263526755811  
CCTGGGGA -0.200074585801  
CCTGGGGC -0.382212684788  
CCTGGGTA -0.267336040604  
CCTGGGTC -0.293510917635  
CCTGGTAA -0.0906381612081  
CCTGGTAC -0.293938907573  
CCTGGTAG -0.2975380307  
CCTGGTCA -0.143396876594  
CCTGGTCC -0.426222067905  
CCTGGTCG -0.257023513231  
CCTGGTGA -0.0571385830104  
CCTGGTGC -0.274862714939  
CCTGGTTA -0.243039816467  
CCTGGTTC -0.225062130337  
CCTGTAAA 0.117284293045  
CCTGTAAC 0.0469004328372

CCTGTAAG 0.0188940864084  
CCTGTACA -0.211888626322  
CCTGTACC -0.276310087473  
CCTGTACG -0.11632052141  
CCTGTAGA 0.100054600055  
CCTGTAGC -0.14865595178  
CCTGTATA 0.0437779377173  
CCTGTATC 0.0891787103908  
CCTGTCAA 0.0230326745478  
CCTGTCAC -0.209703650412  
CCTGTCAG -0.0721207380414  
CCTGTCCA -0.139213222994  
CCTGTCCC -0.209743007399  
CCTGTCCG -0.199628039055  
CCTGTCGA 0.0520522259448  
CCTGTCGC 0.0709991752005  
CCTGTCTA -0.147788625884  
CCTGTCTC -0.2142506942  
CCTGTGAA -0.235105189302  
CCTGTGAC -0.196365119927  
CCTGTGAG -0.0999776669396  
CCTGTGCA -0.108732965434  
CCTGTGCC -0.193225207939  
CCTGTGCG -0.0480968062608  
CCTGTGGA 0.037158962039  
CCTGTGGC -0.340618838649  
CCTGTGTA -0.0809858178288  
CCTGTGTC -0.1702554704  
CCTGTTAA 0.101538282678  
CCTGTTAC -0.284901239162  
CCTGTTAG 0.097657553322  
CCTGTTCA -0.0621955354854  
CCTGTTCC -0.274113214204  
CCTGTTCG -0.217125688021  
CCTGTTGA 0.0159181219787  
CCTGTTGC -0.24754847231  
CCTGTTTA -0.169063391639  
CCTGTTTC -0.0165086731022  
CCTTAAAA -0.0288599793591  
CCTTAAAC 0.138305730531  
CCTTAAAG -0.0948002746276  
CCTTAAACA -0.104963823697  
CCTTAAACC -0.258062421098  
CCTTAAACG -0.10088943897  
CCTTAAAGA 0.00347437647351  
CCTTAAAGC 0.0952260800746  
CCTTAAAGG -0.136407487341  
CCTTAAATA 0.0439145593965  
CCTTAAATC -0.00022198507047  
CCTTACAA -0.0810163929906  
CCTTACAC -0.0577132536433  
CCTTACAG 0.0590025286995  
CCTTACCA -0.0989921888799  
CCTTACCC -0.246304244158



CCTTACCG -0.118371031992  
CCTTACGA 0.0435552785275  
CCTTACGC 0.0669617129228  
CCTTACTA -0.182135757435  
CCTTACTC -0.160925221916  
CCTTAGAA -0.0176636999689  
CCTTAGAC -0.11548006055  
CCTTAGAG -0.150719512142  
CCTTAGCA -0.0817218707356  
CCTTAGCC -0.093828848615  
CCTTAGCG -0.0580024202648  
CCTTAGGA -0.242551281771  
CCTTAGGC -0.147435314102  
CCTTAGTA -0.0587819224183  
CCTTAGTC 0.00735093392115  
CCTTATAA 0.0519864528514  
CCTTATAC -0.191093629799  
CCTTATAG -0.112661531522  
CCTTATCA -0.0191697343205  
CCTTATCC -0.0873332136398  
CCTTATCG 0.0642431187638  
CCTTATGA 0.0933269673651  
CCTTATGC -0.0716264521242  
CCTTATTA 0.0281943939639  
CCTTATTC -0.0867900702904  
CCTTCAAA -0.0603964876682  
CCTTCAAC -0.199946140586  
CCTTCAAG -0.0410749682268  
CCTTCACA -0.132109702198  
CCTTCACC -0.269710564834  
CCTTCACG -0.12471846477  
CCTTCAGA -0.0595453397618  
CCTTCAGC -0.30022494025  
CCTTCATA -0.129229521535  
CCTTCATC -0.0631346858702  
CCTTCCAA -0.0852533216954  
CCTTCCAC -0.217897945766  
CCTTCCAG -0.206597381827  
CCTTCCCA -0.21905025792  
CCTTCCCC -0.396042297968  
CCTTCCCG -0.167650829095  
CCTTCCGA -0.101061116213  
CCTTCCGC -0.222478506872  
CCTTCCTA -0.225095694583  
CCTTCCTC -0.422622043832  
CCTTCGAA -0.149387008581  
CCTTCGAC -0.151677784767  
CCTTCGAG -0.214490895808  
CCTTCGCA -0.220433175379  
CCTTCGCC -0.246119969866  
CCTTCGCG -0.206673262443  
CCTTCGGA -0.243324397018  
CCTTCGGC -0.180503805542  
CCTTCGTA -0.0507507849414

CCTTCGTC -0.342795842945  
CCTTCTAA -0.00784117450784  
CCTTCTAC -0.174770962897  
CCTTCTAG 0.0261957741547  
CCTTCTCA -0.0909339693002  
CCTTCTCC -0.202258514124  
CCTTCTCG -0.235259823744  
CCTTCTGA -0.168394203858  
CCTTCTGC -0.226196013495  
CCTTCTTA -0.070962879333  
CCTTCTTC -0.208614326223  
CCTTGAAA -0.0418386620893  
CCTTGAAC -0.159971548851  
CCTTGAAG -0.0879207991772  
CCTTGACA -0.0520443953369  
CCTTGACC -0.223089136421  
CCTTGACG 0.106686576384  
CCTTGAGA 0.0492710341195  
CCTTGAGC -0.158698593449  
CCTTGATA 0.12994970913  
CCTTGATC -0.113381181608  
CCTTGCAA 0.121103196861  
CCTTGCAC -0.0991974695037  
CCTTG CAG -0.11590145268  
CCTTGCCA -0.0136310734397  
CCTTGCCC -0.377009621931  
CCTTGCCG -0.161197958102  
CCTTGCGA -0.19811579628  
CCTTGCGC 0.156349186652  
CCTTGCTA 0.0382076291167  
CCTTGCTC -0.248974466365  
CCTTG GAA -0.185827146952  
CCTTG GAC -0.0645099754336  
CCTTG GAG -0.16483796347  
CCTTG GCA -0.11670125633  
CCTTG GCC -0.0302409847864  
CCTTG GCG -0.115776668209  
CCTTG GGA -0.0175746948656  
CCTTG GGC -0.22795485687  
CCTTG GTA -0.185073071484  
CCTTG GTC -0.129226184076  
CCTTG TAA 0.14658876083  
CCTTG TAC -0.257452204717  
CCTTG TAG -0.125702257281  
CCTTG TCA -0.0801589861942  
CCTTG TCC -0.0897605810394  
CCTTG TCG -0.108057051393  
CCTTG TGA -0.222575852008  
CCTTG TGC -0.253236421606  
CCTTG TTA 0.0904141055656  
CCTTG TTC -0.288204359709  
CCTTTAAA 0.116142313112  
CCTTTAAC 0.0529878907761  
CCTTTAAG -0.134541524328

CCTTTACA 0.102302026544  
CCTTTACC -0.202024115444  
CCTTTACG -0.0554593695029  
CCTTTAGA 0.159331507816  
CCTTTAGC -0.0815944222514  
CCTTTATA -0.0831947787677  
CCTTTATC 0.058732286005  
CCTTTCAA -0.0362554104655  
CCTTTCAC -0.108442172538  
CCTTTCAG -0.0165907840169  
CCTTTCCA -0.238002990356  
CCTTTCCC -0.23394352159  
CCTTTCCG -0.0776225082723  
CCTTTCGA -0.0774182442994  
CCTTTCGC -0.0264721208202  
CCTTTCTA -0.0674678015733  
CCTTTCTC -0.108008559122  
CCTTTGAA -0.00802975117333  
CCTTTGAC -0.202010789859  
CCTTTGAG -0.0683283083947  
CCTTTGCA -0.284768221048  
CCTTTGCC 0.0316369704941  
CCTTTGCG -0.284138052612  
CCTTTGGA -0.1267781694  
CCTTTGGC -0.196180498882  
CCTTTGTA -0.150444869048  
CCTTTGTC -0.203306150628  
CCTTTTAA 0.105139574837  
CCTTTTAC -0.209546262977  
CCTTTTAG 0.0741144354503  
CCTTTTCA 0.0692331449907  
CCTTTTCC -0.176770522118  
CCTTTTCG -0.0480994790154  
CCTTTTGA -0.136228556582  
CCTTTTGC -0.0801948311564  
CCTTTTTA -0.0104267789756  
CCTTTTTC -0.149777634405  
CGAAAAAA 0.0813317956541  
CGAAAAAC 0.14073439831  
CGAAAAAG 0.0883360218389  
CGAAAACA -0.0674918221588  
CGAAAACC -0.0798970422392  
CGAAAACG -0.134197608173  
CGAAAAGA 0.00215104778727  
CGAAAAGC -0.0602651036839  
CGAAAATA 0.078359597965  
CGAAAATC 0.405798360344  
CGAAACAA -0.0398539034903  
CGAAACAC -0.0977328963599  
CGAAACAG -0.13296627918  
CGAAACCA 0.038061145991  
CGAAACCC -0.34650436635  
CGAAACCG 0.0534184322063  
CGAAACGA 0.031773756779

CGAAACGC 0.0324803106501  
CGAAACTA 0.0695072370678  
CGAAACTC -0.103909694819  
CGAAAGAA 0.101772223966  
CGAAAGAC -0.103861229316  
CGAAAGAG -0.235592591998  
CGAAAGCA -0.182300689921  
CGAAAGCC -0.16184964682  
CGAAAGCG -0.0997822269773  
CGAAAGGA -0.0999582573768  
CGAAAGGC -0.0163952089708  
CGAAAGTA -0.0239946340425  
CGAAAGTC -0.2592555834  
CGAAATAA 0.220695167259  
CGAAATAC 0.157959398011  
CGAAATAG 0.122624322095  
CGAAATCA 0.405806442195  
CGAAATCC 0.482114260272  
CGAAATCG 0.445183682109  
CGAAATGA 0.0191871710838  
CGAAATGC 0.129102932133  
CGAAATTA 0.211667590455  
CGAAATTC 0.185524650275  
CGAACAAA 0.0162558484121  
CGAACAAC 0.0131770889347  
CGAACAAAG -0.0841932474903  
CGAACACA -0.069645383031  
CGAACACC -0.247300096188  
CGAACACG -0.00326359417269  
CGAACAGA 0.0375214035784  
CGAACAGC -0.191253870182  
CGAACATA -0.140036316767  
CGAACATC -0.0110758141061  
CGAACCAA -0.11164297485  
CGAACCCAC -0.209810417132  
CGAACCCAG -0.188129785641  
CGAACCCA 0.0445238425436  
CGAACCCC -0.231967113819  
CGAACCCG 0.0846314634193  
CGAACCGA -0.0238360747142  
CGAACCGC -0.194263593044  
CGAACCTA 0.0378045769657  
CGAACCTC -0.176640615308  
CGAACGAA -0.129021184373  
CGAACGAC -0.171866722126  
CGAACGAG -0.0806701629065  
CGAACGCA 0.0919914404763  
CGAACGCC -0.211732252104  
CGAACGCG -0.0198973077761  
CGAACGGA -0.064922568781  
CGAACGGC -0.0421286422001  
CGAACGTA -0.065576886151  
CGAACGTC -0.204383338904  
CGAACTAA -0.108752074669

CGAACTAC -0.172972124698  
CGAACTAG -0.160169400399  
CGAACTCA -0.0788719955037  
CGAACTCC -0.170874011714  
CGAACTCG -0.0236435767637  
CGAACTGA -0.0875069152205  
CGAACTGC -0.051082763204  
CGAACTTA 0.149455851332  
CGAACTTC -0.348496832557  
CGAAGAAA 0.169954672525  
CGAAGAAC -0.124761148473  
CGAAGAAG -0.191757642798  
CGAAGACA -0.149171567776  
CGAAGACC -0.21757176564  
CGAAGACG -0.0730415631007  
CGAAGAGA -0.0321558215604  
CGAAGAGC 0.0615146827268  
CGAAGATA 0.286103804253  
CGAAGATC 0.324598703387  
CGAAGCAA -0.078168212136  
CGAAGCAC -0.133542633543  
CGAAGCAG -0.0526810878186  
CGAAGCCA -0.189078306327  
CGAAGCCC -0.296366957966  
CGAAGCCG -0.154225420061  
CGAAGCGA 0.0158133339952  
CGAAGCGC -0.153059556287  
CGAAGCTA -0.171176014845  
CGAAGCTC -0.152190933025  
CGAAGGAA -0.0174222462282  
CGAAGGAC -0.246118850324  
CGAAGGAG -0.163146636676  
CGAAGGCA -0.165080073995  
CGAAGGCC -0.431381221255  
CGAAGGCG -0.0846620044579  
CGAAGGGA -0.108161526947  
CGAAGGGC -0.0931259440881  
CGAAGGTA -0.137441937503  
CGAAGGTC -0.405520578648  
CGAAGTAA 0.0278323940311  
CGAAGTAC -0.0675083096246  
CGAAGTAG -0.154900079143  
CGAAGTCA -0.189787822904  
CGAAGTCC -0.259953881069  
CGAAGTCG -0.0599146922337  
CGAAGTGA 0.110359670966  
CGAAGTGC 0.0221892821746  
CGAAGTTA -0.00131748939804  
CGAAGTTC -0.333020325791  
CGAATAAA 0.0932544606298  
CGAATAAC -0.0241286687153  
CGAATAAG -0.175880236724  
CGAATACA 0.107447668054  
CGAATACC -0.0488551345591

CGAATACG 0.259835916002  
CGAATAGA 0.0382346858585  
CGAATAGC 0.100642321701  
CGAATATA 0.180336926929  
CGAATATC 0.377024590702  
CGAATCAA 0.326335977851  
CGAATCAC 0.29351984993  
CGAATCAG 0.271508653095  
CGAATCCA 0.41109975694  
CGAATCCC 0.305078579649  
CGAATCCG 0.437166339423  
CGAATCGA 0.314418662365  
CGAATCGC 0.288617818921  
CGAATCTA 0.427084108902  
CGAATCTC 0.441180850054  
CGAATGAA 0.0844246450307  
CGAATGAC -0.0344041083193  
CGAATGAG 0.00835529148997  
CGAATGCA -0.164566575375  
CGAATGCC -0.197636813924  
CGAATGCG 0.059738802163  
CGAATGGA -0.169725744504  
CGAATGGC -0.0716129352493  
CGAATGTA 0.0639540739984  
CGAATGTC -0.247908125362  
CGAATTAA -0.0571702809428  
CGAATTAC 0.0190265906586  
CGAATTAG 0.0641234133559  
CGAATTCA 0.0321988655322  
CGAATTCC 0.0813744482573  
CGAATTGC 0.184210816458  
CGAATTGA -0.0359602026269  
CGAATTGC 0.194149763144  
CGAATTTA 0.270139340014  
CGAATTTTC 0.237630192176  
CGACAAAA 0.0694634424064  
CGACAAAC 0.0660357802384  
CGACAAAG -0.0997649686503  
CGACAACA 0.0594078927412  
CGACAACC -0.142526102192  
CGACAACG -0.0361973543792  
CGACAAGA -0.102521946628  
CGACAAGC -0.147411561334  
CGACAATA 0.019344831865  
CGACAATC 0.288533097815  
CGACACAA 0.1015824471  
CGACACAC -0.265632279924  
CGACACAG -0.149989709787  
CGACACCA -0.209816222989  
CGACACCC -0.0224701285307  
CGACACCG -0.0551668141678  
CGACACGA 0.0836412341336  
CGACACGC -0.328183167385  
CGACACTA -0.231015191503

CGACACTC -0.208013188982  
CGACAGAA 0.123406786713  
CGACAGAC 0.0509091041802  
CGACAGAG -0.0127881442148  
CGACAGCA -0.170352655094  
CGACAGCC -0.255396679268  
CGACAGCG 0.0263390111875  
CGACAGGA 0.144099911101  
CGACAGGC 0.0563290179372  
CGACAGTA -0.0213911705586  
CGACAGTC -0.234757064203  
CGACATAA 0.00652759428626  
CGACATAC -0.186083606996  
CGACATAG -0.0616690287936  
CGACATCA -0.111107785961  
CGACATCC 0.117965072511  
CGACATCG -0.0160112634279  
CGACATGA 0.101643759626  
CGACATGC -0.116184300134  
CGACATTA 0.0689518719822  
CGACATTC -0.107344364722  
CGACCAAA -0.160396555575  
CGACCAAC -0.202747588727  
CGACCAAG -0.244231368236  
CGACCACA -0.174654200315  
CGACCACC -0.234798680195  
CGACCACG -0.338520182971  
CGACCAGA -0.0761062347365  
CGACCAGC -0.141946780449  
CGACCATA -0.273141763962  
CGACCATC -0.217436728663  
CGACCCAA -0.193269074992  
CGACCCAC -0.375556800591  
CGACCCAG -0.161664382952  
CGACCCCA -0.256850533072  
CGACCCCC -0.299615343644  
CGACCCCG -0.00179362676571  
CGACCCGA 0.0124363366708  
CGACCCGC -0.104556433664  
CGACCCTA -0.216695746129  
CGACCCTC -0.349115961717  
CGACCGAA 0.0166266432122  
CGACCGAC -0.130238963746  
CGACCGAG -0.217427880581  
CGACCGCA -0.187140742211  
CGACCGCC -0.343007382308  
CGACCGCG -0.032258704986  
CGACCGGA 0.00278915222457  
CGACCGGC -0.317644205194  
CGACCGTA -0.207863650774  
CGACCGTC -0.187234300275  
CGACCTAA -0.0997813403631  
CGACCTAC -0.238414707998  
CGACCTAG -0.313574273939

CGACCTCA -0.308933975838  
CGACCTCC -0.270629505576  
CGACCTCG -0.318442491978  
CGACCTGA -0.138550172581  
CGACCTGC -0.209160787298  
CGACCTTA -0.22631714126  
CGACCTTC -0.371338211584  
CGACGAAA 0.126863645322  
CGACGAAC -0.19723316466  
CGACGAAG -0.240008930565  
CGACGACA -0.160577835995  
CGACGACC -0.384064632774  
CGACGACG -0.093306805428  
CGACGAGA 0.0111961051948  
CGACGAGC -0.208822854378  
CGACGATA 0.125920600279  
CGACGATC 0.173922468851  
CGACGCAA -0.0271994043926  
CGACGCAC -0.176172113884  
CGACGCAG -0.0952869944226  
CGACGCCA -0.15403119305  
CGACGCCC -0.323062454125  
CGACGCCG -0.161518422032  
CGACGCGA 0.0822894389174  
CGACGCGC -0.151928548177  
CGACGCTA -0.100213351857  
CGACGCTC -0.282775428238  
CGACGGAA 0.116362919393  
CGACGGAC -0.26954343486  
CGACGGAG -0.174825359208  
CGACGGCA -0.212345161869  
CGACGGCC -0.388067618821  
CGACGGCG -0.169735910739  
CGACGGGA -0.0749820112647  
CGACGGGC -0.0423915291393  
CGACGGTA -0.170508832798  
CGACGGTC -0.284501509325  
CGACGTAA 0.143277884426  
CGACGTAC -0.18267317845  
CGACGTAG -0.0686790287994  
CGACGTCA -0.268877144519  
CGACGTCC -0.196654565102  
CGACGTCT -0.136840437113  
CGACGTGA -0.0784249835775  
CGACGTGC -0.159754864262  
CGACGTTA 0.118469668547  
CGACGTTC -0.231987066577  
CGACTAAA -0.0245770740487  
CGACTAAC -0.148799766993  
CGACTAAG -0.0644364393235  
CGACTACA 0.00978981065588  
CGACTACC -0.0412795289096  
CGACTACG -0.00895819799566  
CGACTAGA -0.0355835859917



CGACTAGC -0.22320820059  
CGACTATA -0.0989022138201  
CGACTATC 0.0571863389853  
CGACTCAA 0.120180579987  
CGACTCAC -0.0458952631448  
CGACTCAG -0.0475231007471  
CGACTCCA -0.100265645876  
CGACTCCC -0.0864673884574  
CGACTCCG -0.0256322854244  
CGACTCGA -0.113278460245  
CGACTCGC -0.261691236661  
CGACTCTA -0.209329426067  
CGACTCTC -0.0238077511685  
CGACTGAA 0.164547491661  
CGACTGAC -0.204813975313  
CGACTGAG 0.080293792415  
CGACTGCA -0.202422999192  
CGACTGCC -0.226329227707  
CGACTGCG 0.0221360116202  
CGACTGGA 0.0337866342408  
CGACTGGC -0.174072052251  
CGACTGTA -0.237662208769  
CGACTGTC -0.307401710674  
CGACTTAA -0.0239277576586  
CGACTTAC -0.264620354521  
CGACTTAG -0.183938215636  
CGACTTCA -0.0850959959719  
CGACTTCC -0.175068791554  
CGACTTGA -0.213080051779  
CGACTTGC -0.195466410865  
CGACTTTA 0.0471135668562  
CGACTTTC -0.28181658968  
CGAGAAAA 0.101361692271  
CGAGAAAC -0.0562216169938  
CGAGAAAG -0.162182133  
CGAGAACA -0.165430076842  
CGAGAACC -0.149065680412  
CGAGAACG -0.307432125106  
CGAGAAGA -0.0254093168148  
CGAGAAGC -0.154601312054  
CGAGAATA 0.100320706381  
CGAGAATC 0.437166339423  
CGAGACAA -0.0513303679992  
CGAGACAC -0.139956496208  
CGAGACAG -0.191913096397  
CGAGACCA -0.122702307326  
CGAGACCC -0.311880997075  
CGAGACCG -0.0326069979842  
CGAGACGA -0.105378351435  
CGAGACGC -0.216276191343  
CGAGACTA 0.0993284818581  
CGAGACTC -0.177357342103  
CGAGAGAA 0.0999415393355  
CGAGAGAC -0.10938391683

CGAGAGAG -0.0223443587008  
CGAGAGCA -0.169688072889  
CGAGAGCC -0.0826926249071  
CGAGAGCG 0.0137706635783  
CGAGAGGA -0.23827824631  
CGAGAGGC -0.158465155637  
CGAGAGTA 0.122615563163  
CGAGAGTC -0.235821335737  
CGAGATAA 0.0711597556258  
CGAGATAC 0.320736772187  
CGAGATAG 0.0903510186863  
CGAGATCA 0.219638256097  
CGAGATCC 0.425332530958  
CGAGATCG 0.322789731881  
CGAGATGA -0.0495630673301  
CGAGATGC 0.00764873761888  
CGAGATTA 0.39527544073  
CGAGATTC 0.45752777571  
CGAGCAAA 0.118687495347  
CGAGCAAC -0.282464773883  
CGAGCAAG -0.0816750220743  
CGAGCACA -0.133069718397  
CGAGCACC -0.183678082966  
CGAGCACG -0.172756476541  
CGAGCAGA -0.307406948062  
CGAGCAGC -0.323150046326  
CGAGCATA -0.132578107551  
CGAGCATC -0.192924932673  
CGAGCCAA -0.163841572947  
CGAGCCAC -0.385352332763  
CGAGCCAG -0.228612975294  
CGAGCCCA -0.263588746916  
CGAGCCCC -0.249208647162  
CGAGCCCG -0.0432426545798  
CGAGCCGA -0.160572479259  
CGAGCCGC -0.361722756819  
CGAGCCTA -0.117670815587  
CGAGCCTC -0.280627678622  
CGAGCGAA -0.113558382043  
CGAGCGAC -0.233666170961  
CGAGCGAG -0.2119185301  
CGAGCGCA -0.234176845688  
CGAGCGCC -0.176116634093  
CGAGCGCG 0.0505737545781  
CGAGCGGA -0.0735385342941  
CGAGCGGC -0.27382468951  
CGAGCGTA 0.0783046755903  
CGAGCGTC -0.141511384595  
CGAGCTAA -0.0523705523706  
CGAGCTAC -0.248754901231  
CGAGCTAG -0.0740207635356  
CGAGCTCA -0.192380889833  
CGAGCTCC -0.22666429609  
CGAGCTCG -0.120629211625

CGAGCTGA -0.221570354564  
CGAGCTGC -0.207583765498  
CGAGCTTA -0.0662164233017  
CGAGCTTC -0.221662815934  
CGAGGAAA -0.0873799233086  
CGAGGAAC -0.184330837849  
CGAGGAAG -0.264045005776  
CGAGGACA -0.160641611038  
CGAGGACC -0.333436701481  
CGAGGACG -0.0212644248666  
CGAGGAGA -0.0751851599137  
CGAGGAGC -0.204997964155  
CGAGGATA 0.270828376021  
CGAGGATC 0.186024867843  
CGAGGCAA -0.121508391441  
CGAGGCAC -0.231474171031  
CGAGGCAG -0.149383858449  
CGAGGCCA -0.279400049068  
CGAGGCCC -0.250926775757  
CGAGGCCG -0.157461788917  
CGAGGCGA -0.020381753714  
CGAGGCGC -0.131828471068  
CGAGGCTA -0.0128020984319  
CGAGGCTC -0.257594802374  
CGAGGGAA 0.0381475429322  
CGAGGGAC -0.172719418959  
CGAGGGAG -0.145508723328  
CGAGGGCA -0.272163919694  
CGAGGGCC -0.377793260427  
CGAGGGCG -0.294777014232  
CGAGGGGA -0.24756075668  
CGAGGGGC -0.18192094106  
CGAGGGTA -0.11390664899  
CGAGGGTC -0.427628632246  
CGAGGTAA 0.0171988934549  
CGAGGTAC -0.309854951483  
CGAGGTAG -0.105443785255  
CGAGGTCA -0.206401639162  
CGAGGTCC -0.338590209035  
CGAGGTGA -0.332879936717  
CGAGGTGC -0.148432379726  
CGAGGTTA 0.0416790219574  
CGAGGTTC -0.166252625464  
CGAGTAAA -0.0169880624426  
CGAGTAAC -0.137177299644  
CGAGTAAG 0.0523681112186  
CGAGTACA -0.0349328116903  
CGAGTACC -0.181664281716  
CGAGTACG 0.0954599534317  
CGAGTAGA -0.117945452089  
CGAGTAGC -0.225838016751  
CGAGTATA 0.1482184664  
CGAGTATC 0.328806668467  
CGAGTCAA 0.0390508885856

CGAGTCAC -0.136496593857  
CGAGTCAG -0.0915356257565  
CGAGTCCA -0.226608441059  
CGAGTCCC -0.248583504967  
CGAGTCCG -0.264049125419  
CGAGTCGA -0.216374051335  
CGAGTCGC -0.178738507767  
CGAGTCTA -0.150778167878  
CGAGTCTC -0.208334367169  
CGAGTGAA -0.0793128617622  
CGAGTGAC -0.192449511732  
CGAGTGAG -0.0472802455639  
CGAGTGCA 0.057361769483  
CGAGTGCC -0.238861737522  
CGAGTGCG -0.00785165288351  
CGAGTGGA -0.248794851026  
CGAGTGGC -0.1601899863  
CGAGTGTA -0.0298044178589  
CGAGTGTC -0.359427102107  
CGAGTTAA -0.11846816797  
CGAGTTAC -0.29408456761  
CGAGTTAG -0.266599126108  
CGAGTTCA -0.124499918664  
CGAGTTCC -0.149425762777  
CGAGTTGA -0.0943705589016  
CGAGTTGC -0.220825924548  
CGAGTTTA 0.221944774932  
CGAGTTTC 0.0523601672956  
CGATAAAA 0.171858280476  
CGATAAAC -0.152190381157  
CGATAAAG -0.0468305771336  
CGATAACA 0.0741835620518  
CGATAACC -0.175713708071  
CGATAACG -0.0427238008576  
CGATAAGA 0.0995591337416  
CGATAAGC 0.0852557973183  
CGATAATA 0.0166032860594  
CGATAATC 0.25449475147  
CGATACAA 0.0300628453392  
CGATACAC -0.0471468099362  
CGATACAG -0.0192820595169  
CGATACCA 0.119596651168  
CGATACCC 0.212194287952  
CGATACCG 0.171572155354  
CGATACGA 0.186888608279  
CGATACGC 0.188884476763  
CGATACTA 0.0833375911476  
CGATACTC 0.211819257274  
CGATAGAA 0.226211059544  
CGATAGAC -0.0672776691886  
CGATAGAG -0.00723852762348  
CGATAGCA 0.0333357663701  
CGATAGCC -0.159473880134  
CGATAGCG 0.144765443092

CGATAGGA -0.0821856621752  
CGATAGGC -0.0688177679081  
CGATAGTA 0.148340547287  
CGATAGTC -0.0598803881182  
CGATATAA 0.187446260301  
CGATATAC 0.141666240885  
CGATATAG 0.278403748101  
CGATATCA 0.367203291446  
CGATATCC 0.466823572884  
CGATATCG 0.457420683154  
CGATATGA 0.246782595267  
CGATATGC 0.225670240798  
CGATATTA 0.266350372411  
CGATATTC 0.353329913936  
CGATCAAA 0.111261067276  
CGATCAAC -0.0640197659905  
CGATCAAG 0.00283519865002  
CGATCACA 0.193276789559  
CGATCACC 0.0560769089087  
CGATCACG 0.171786343667  
CGATCAGA 0.0427632971541  
CGATCAGC -0.0479700999733  
CGATCATA 0.0802276105306  
CGATCATC -0.000583169963025  
CGATCCAA 0.244912957034  
CGATCCAC 0.137678007051  
CGATCCAG 0.0618168945206  
CGATCCCA 0.259529353372  
CGATCCCC 0.160103793348  
CGATCCCG 0.238275465548  
CGATCCGA 0.216829777436  
CGATCCGC 0.226403071466  
CGATCCTA 0.11578359598  
CGATCCTC 0.326517978033  
CGATCGAA 0.0740120285575  
CGATCGAC -0.0226484091589  
CGATCGAG 0.0684417199569  
CGATCGCA 0.35657282627  
CGATCGCC 0.286869514142  
CGATCGCG 0.382878477114  
CGATCGGA 0.0899885403969  
CGATCGGC 0.0136530902095  
CGATCGTA 0.268047977281  
CGATCGTC 0.12409262092  
CGATCTAA 0.210587359401  
CGATCTAC 0.219361234513  
CGATCTAG 0.263540399904  
CGATCTCA 0.31822318186  
CGATCTCC 0.350045637924  
CGATCTGA 0.293727611909  
CGATCTGC 0.339514897541  
CGATCTTA 0.271616679927  
CGATCTTC 0.394063633643  
CGATGAAA 0.0192989132383

CGATGAAC -0.203506234392  
CGATGAAG -0.0079442928813  
CGATGACA 0.0111639891097  
CGATGACC -0.212749806535  
CGATGACG -0.0864922665927  
CGATGAGA 0.0165314208667  
CGATGAGC -0.189773808047  
CGATGATA 0.012213481566  
CGATGATC 0.17089403453  
CGATGCAA 0.0319372568484  
CGATGCAC -0.093946036867  
CGATGCAG 0.0754165967169  
CGATGCCA -0.0987377058673  
CGATGCCC -0.115574966018  
CGATGCCG -0.0833390509697  
CGATGCGA -0.0417933607669  
CGATGCGC -0.106741727954  
CGATGCTA 0.0679867195019  
CGATGCTC -0.188185524067  
CGATGGAA 0.0626204717114  
CGATGGAC -0.175655358548  
CGATGGAG 0.0345093821952  
CGATGGCA 0.0935356844448  
CGATGGCC -0.39442577795  
CGATGGCG -0.133769517303  
CGATGGGA 0.0579919245385  
CGATGGGC 0.0308423903126  
CGATGGTA -0.120175823983  
CGATGGTC -0.356947372773  
CGATGTAA -0.0710476316537  
CGATGTAC -0.0985218822634  
CGATGTAG -0.167335198801  
CGATGTCA -0.0668634993394  
CGATGTCC -0.183910184841  
CGATGTGA -0.126851599137  
CGATGTGC -0.28083747495  
CGATGTTA 0.159353444815  
CGATGTTC -0.0370542549667  
CGATTAAC -0.113094991907  
CGATTAAG 0.0416567520419  
CGATTACA 0.399870805749  
CGATTACC 0.408679371985  
CGATTACG 0.447195316891  
CGATTAGA 0.213848835061  
CGATTAGC -0.0648489449136  
CGATTATA 0.0769990438166  
CGATTATC 0.212458851266  
CGATTCAA 0.0117376329498  
CGATTCAC 0.122142580819  
CGATTCAG 0.0706505403475  
CGATTCCA 0.197639788549  
CGATTCCC 0.443364743838  
CGATTCCG 0.403476065216

CGATTCGA 0.20548966081  
CGATTCGC 0.401456172493  
CGATTCTA 0.20768523317  
CGATTCTC 0.41165545711  
CGATTGAA -0.127226178955  
CGATTGAC -0.194543013199  
CGATTGAG -0.0434856343947  
CGATTGCA 0.297340039764  
CGATTGCC 0.30074888871  
CGATTGCG 0.426778017687  
CGATTGGA 0.0151763333582  
CGATTGGC 0.0299541966209  
CGATTGTA -0.0285256527229  
CGATTGTC 0.141964044583  
CGATTTAA 0.0643467158619  
CGATTTAC -0.0592782639796  
CGATTTAG 0.174220272549  
CGATTTCA 0.371147347138  
CGATTTCC 0.468425726001  
CGATTTGA 0.10890366951  
CGATTTGC 0.305779435487  
CGATTTTA 0.338651708357  
CGATTTTC 0.414302606512  
CGCAAAAA 0.117179938953  
CGCAAAAC -0.00342255279081  
CGCAAAAG 0.129342423159  
CGCAAACA -0.0597057112209  
CGCAAACC -0.278572898529  
CGCAAACG -0.163821410552  
CGCAAAGA -0.200576689821  
CGCAAAGC 0.0219900294154  
CGCAAATA 0.159662417238  
CGCAAATC 0.419543367663  
CGCAACAA 0.121815580681  
CGCAACAC -0.0574666921636  
CGCAACAG -0.0299758666898  
CGCAACCA -0.136009615876  
CGCAACCC -0.0200616044904  
CGCAACCG 0.0107866733027  
CGCAACGA 0.147415020109  
CGCAACGC -0.065932132873  
CGCAACTA 0.0787041159683  
CGCAACTC 0.022223600943  
CGCAAGAA 0.021853363774  
CGCAAGAC -0.149554303801  
CGCAAGAG 0.00843926226178  
CGCAAGCA -0.0208403996283  
CGCAAGCC -0.284750130237  
CGCAAGCG -0.028900745888  
CGCAAGGA -0.174519290411  
CGCAAGGC -0.0757851515427  
CGCAAGTA 0.230730730731  
CGCAAGTC -0.0612295255977  
CGCAATAA 0.105871404276

CGCAATAC 0.131316102567  
CGCAATAG -0.000993408903455  
CGCAATCA 0.430600021509  
CGCAATCC 0.478275796458  
CGCAATGA 0.0708719068775  
CGCAATGC 0.0444596103735  
CGCAATTA 0.190068100699  
CGCAATTC 0.309799785406  
CGCACAAA -0.00700787573995  
CGCACAAC 0.0358990743728  
CGCACAAAG 0.0336496281103  
CGCACACA 0.0718604702087  
CGCACACC -0.0693072414473  
CGCACACG 0.0198835198835  
CGCACAGA -0.185699940597  
CGCACAGC -0.0449297541741  
CGCACATA 0.169907189121  
CGCACATC -0.0420643763985  
CGCACCAA -0.179749588574  
CGCACCCAC -0.169403153893  
CGCACCCAG 0.0396898616011  
CGCACCCA -0.126054277312  
CGCACCCC -0.22391478734  
CGCACCCG -0.0563153231915  
CGCACCGA -0.217008935094  
CGCACCGC -0.0529055621157  
CGCACCTA -0.0158684855655  
CGCACCTC -0.209570774043  
CGCACGAA 0.0134500704364  
CGCACGAC -0.185776298063  
CGCACGAG -0.14898482405  
CGCACGCA 0.0785758210001  
CGCACGCC -0.351002020302  
CGCACGCG 0.0955446231104  
CGCACGGA -0.0925281103595  
CGCACGGC -0.174085337824  
CGCACGTA 0.162191765433  
CGCACGTC 0.101635000693  
CGCACTAA 0.0460770932023  
CGCACTAC -0.017690853485  
CGCACTAG -0.130269720354  
CGCACTCA -0.139592656007  
CGCACTCC -0.284582516806  
CGCACTGA 0.0675539398246  
CGCACTGC 0.127292833004  
CGCACTTA -0.0258220622906  
CGCACTTC -0.0385611832146  
CGCAGAAA 0.0492048522352  
CGCAGAAC -0.115073866018  
CGCAGAAG -0.251208208928  
CGCAGACA -0.148249860973  
CGCAGACC -0.132992549457  
CGCAGACG -0.137389608296  
CGCAGAGA -0.111171762786



CGCAGAGC -0.106913531233  
CGCAGATA 0.292506733429  
CGCAGATC 0.332794226734  
CGCAGCAA -0.00642038993815  
CGCAGCAC -0.0585279301189  
CGCAGCAG -0.168731187851  
CGCAGCCA -0.253801691846  
CGCAGCCC -0.272306157158  
CGCAGCCG -0.0938623702823  
CGCAGCGA 0.0299194754475  
CGCAGCGC 0.0427203017594  
CGCAGCTA -0.13564965971  
CGCAGCTC -0.16363929626  
CGCAGGAA -0.0516839153203  
CGCAGGAC -0.278300296926  
CGCAGGAG -0.0697842485298  
CGCAGGCA -0.20564777367  
CGCAGGCC -0.256864747275  
CGCAGGCG -0.187068933436  
CGCAGGGA 0.116306278821  
CGCAGGGC -0.148580061589  
CGCAGGTA 0.00406029349725  
CGCAGGTC -0.23038262936  
CGCAGTAA -0.0187906266559  
CGCAGTAC -0.143454315413  
CGCAGTAG -0.273201171422  
CGCAGTCA -0.207625673027  
CGCAGTCC -0.154572771506  
CGCAGTGA -0.131455243735  
CGCAGTGC 0.0933432114625  
CGCAGTTA 0.0976063610915  
CGCAGTTC 0.00875236308694  
CGCATAAA 0.115982131778  
CGCATAAC -0.0826184665867  
CGCATAAG -0.0233856445978  
CGCATACA 0.112317978438  
CGCATACC 0.0168343797305  
CGCATACG 0.0340251081878  
CGCATAGA -0.012274913688  
CGCATAGC 0.149718589113  
CGCATATA 0.155630837449  
CGCATATC 0.288419231696  
CGCATCAA 0.0329060035609  
CGCATCAC 0.0117041232674  
CGCATCAG 0.0664093845912  
CGCATCCA -0.0107779956265  
CGCATCCC -0.0913516822608  
CGCATCCG -0.0585429470265  
CGCATCGA -0.0620430071426  
CGCATCGC -0.134721867404  
CGCATCTA 0.0974365524843  
CGCATCTC -0.147440404792  
CGCATGAA -0.0215965897654  
CGCATGAC -0.231917992333

CGCATGAG -0.144196964766  
CGCATGCA 0.141315883594  
CGCATGCC -0.0522602492299  
CGCATGCG 0.0463989702287  
CGCATGGA -0.108924325121  
CGCATGGC -0.224792574268  
CGCATGTA 0.0234772850719  
CGCATGTC -0.168211824839  
CGCATTAA -0.00982938861727  
CGCATTAC -0.183060854896  
CGCATTAG -0.18005756681  
CGCATTCA -0.112988499204  
CGCATTCC -0.112018994262  
CGCATTGA -0.279576302475  
CGCATTGC -0.157406393894  
CGCATTTA -0.000135033539412  
CGCATTTTC 0.195952150498  
CGCCAAAA 0.0954072263444  
CGCCAAAC -0.0163432751944  
CGCCAAAG 0.0933876460192  
CGCCAACA -0.25940632065  
CGCCAACC -0.271394921599  
CGCCAACG -0.344189803027  
CGCCAAGA -0.230882097574  
CGCCAAGC -0.0626006314877  
CGCCAATA 0.0109245782939  
CGCCAATC 0.0838014322863  
CGCCACAA 0.0639799579194  
CGCCACAC -0.18822757558  
CGCCACAG -0.289071395292  
CGCCACCA -0.248620035228  
CGCCACCC -0.201916583283  
CGCCACCG -0.253556729876  
CGCCACGA -0.113879463211  
CGCCACGC 0.0393589708035  
CGCCACTA -0.00286374528799  
CGCCACTC -0.213611268806  
CGCCAGAA 0.126311832588  
CGCCAGAC -0.243715512851  
CGCCAGAG -0.18452266675  
CGCCAGCA -0.179149744548  
CGCCAGCC -0.222014107685  
CGCCAGCG -0.165319031863  
CGCCAGGA 0.0925317021118  
CGCCAGGC 0.00827646109939  
CGCCAGTA -0.0706730467456  
CGCCAGTC -0.0103395406426  
CGCCATAA -0.113054549289  
CGCCATAC -0.222115924896  
CGCCATAG -0.257947459134  
CGCCATCA -0.156294285485  
CGCCATCC -0.208055948374  
CGCCATGA -0.277123080358  
CGCCATGC -0.0787590700689

CGCCATTA -0.00457827737661  
CGCCATTC 0.0278060429576  
CGCCCAAA -0.0870966329204  
CGCCCAAC -0.197371431722  
CGCCCAAG -0.113885674342  
CGCCCACA 0.0135723943732  
CGCCCACC -0.209732599091  
CGCCCACG -0.223131105406  
CGCCCAGA -0.0893722133438  
CGCCCAGC -0.100954920791  
CGCCCATA 0.0611959024417  
CGCCCATC 0.0148134476512  
CGCCCCAA 0.0357364437275  
CGCCCCAC -0.271407543394  
CGCCCCAG -0.255176903378  
CGCCCCCA -0.234089453093  
CGCCCCCC -0.248339829073  
CGCCCCCG -0.168052529504  
CGCCCCGA -0.0997846651833  
CGCCCCGC -0.171707245086  
CGCCCCTA -0.223890143276  
CGCCCCTC -0.30058752023  
CGCCCGAA -0.0522325283091  
CGCCCGAC -0.461117911116  
CGCCCGAG -0.186316430814  
CGCCCGCA -0.242754865721  
CGCCCGCC -0.288518984959  
CGCCCGCG -0.145003904055  
CGCCCGGA -0.147417850653  
CGCCCGGC -0.127974491948  
CGCCCGTA 0.056504602089  
CGCCCGTC 0.00283037336664  
CGCCCTAA -0.198396040384  
CGCCCTAC -0.0889334193612  
CGCCCTAG -0.227715165056  
CGCCCTCA -0.0784108549575  
CGCCCTCC -0.287970587506  
CGCCCTGA -0.0486105942191  
CGCCCTGC -0.149284778471  
CGCCCTTA -0.00103393798026  
CGCCCTTC -0.294591785822  
CGCCGAAA 0.0622151076697  
CGCCGAAC -0.149287750535  
CGCCGAAG -0.0459656494969  
CGCCGACA -0.16051634068  
CGCCGACC -0.391042974209  
CGCCGACG -0.190193524377  
CGCCGAGA 0.00986229996278  
CGCCGAGC 0.088518485539  
CGCCGATA 0.161686240447  
CGCCGATC 0.153060774273  
CGCCGCAA 0.0942278636234  
CGCCGCAC -0.178113859871  
CGCCGCAG -0.0188732565224

CGCCGCCA -0.180229427089  
CGCCGCCC -0.0738962367415  
CGCCGCCG -0.0392102527621  
CGCCGCGA -0.103662252222  
CGCCGCGC -0.109737123641  
CGCCGCTA -0.00652580955611  
CGCCGCTC -0.259494490894  
CGCCGGAA -0.00397144588075  
CGCCGGAC -0.270259664793  
CGCCGGAG -0.238093952444  
CGCCGGCA -0.171406489694  
CGCCGGCC -0.276039728418  
CGCCGGCG -0.178008036312  
CGCCGGGA -0.173859046989  
CGCCGGGC -0.0339073472122  
CGCCGGTA -0.0449406312812  
CGCCGGTC -0.183763153248  
CGCCGTAA -0.12984252115  
CGCCGTAC -0.232425833962  
CGCCGTAG -0.295906563312  
CGCCGTCA -0.203483119995  
CGCCGTCC -0.163221103303  
CGCCGTGA -0.145110541301  
CGCCGTGC -0.386613718243  
CGCCGTTA -0.102382862799  
CGCCGTTC 0.138848784333  
CGCCTAAA 0.1026948315  
CGCCTAAC -0.144267511972  
CGCCTAAG -0.0309721595777  
CGCCTACA 0.0954614390833  
CGCCTACC -0.142763014609  
CGCCTACG -0.154562621397  
CGCCTAGA -0.111291678727  
CGCCTAGC 0.0393794296475  
CGCCTATA 0.0641292526441  
CGCCTATC 0.00225323533061  
CGCCTCAA 0.049482290331  
CGCCTCAC -0.368713805716  
CGCCTCAG 0.0207339472313  
CGCCTCCA -0.233926145558  
CGCCTCCC -0.234763682953  
CGCCTCCG -0.161027439369  
CGCCTCGA 0.0529677439132  
CGCCTCGC -0.234150744324  
CGCCTCTA -0.26353539555  
CGCCTCTC -0.00388950279469  
CGCCTGAA 0.0405326890652  
CGCCTGAC -0.187631253658  
CGCCTGAG -0.234903426585  
CGCCTGCA -0.142180340384  
CGCCTGCC -0.255794862664  
CGCCTGGA -0.197193113039  
CGCCTGGC -0.0535329721085  
CGCCTGTA -0.179958313689

CGCCTGTC 0.0945723816267  
CGCCTTAA -0.0561815258785  
CGCCTTAC -0.286225724879  
CGCCTTAG -0.168410229268  
CGCCTTCA -0.170052295042  
CGCCTTCC -0.0732100756918  
CGCCTTGA -0.293244333677  
CGCCTTGC -0.183050736115  
CGCCTTTA -0.019927300862  
CGCCTTTC -0.0109193120052  
CGCGAAAA 0.215325941768  
CGCGAAAC -0.0731489064822  
CGCGAAAG -0.106676855213  
CGCGAACA -0.103283724496  
CGCGAACC -0.215197330886  
CGCGAACG -0.0951014049165  
CGCGAAGA -0.0667364264778  
CGCGAAGC -0.000815817554657  
CGCGAATA 0.207062560488  
CGCGAATC 0.425578471033  
CGCGACAA -0.0847197059318  
CGCGACAC -0.149956570294  
CGCGACAG 0.0373999109509  
CGCGACCA -0.0339551364244  
CGCGACCC -0.0827982665734  
CGCGACCG -0.116764964582  
CGCGACGA -0.156996754201  
CGCGACGC 0.0342358029546  
CGCGACTA -0.0130061190667  
CGCGACTC -0.0492597357645  
CGCGAGAA 0.180319437895  
CGCGAGAC -0.178816902806  
CGCGAGAG -0.183742330841  
CGCGAGCA -0.267246108341  
CGCGAGCC -0.246508780405  
CGCGAGCG 0.0624358590688  
CGCGAGGA -0.129432052205  
CGCGAGGC -0.159607822463  
CGCGAGTA -0.0943017468393  
CGCGAGTC -0.244059928286  
CGCGATAA 0.0177653044094  
CGCGATAC 0.094404321677  
CGCGATAG 0.0570584358463  
CGCGATCA 0.350847061743  
CGCGATCC 0.449381888776  
CGCGATGA 0.0501071807861  
CGCGATGC 0.199410961804  
CGCGATTA 0.194786245557  
CGCGATTC 0.389429374278  
CGCGCAAA 0.158664173816  
CGCGCAAC -0.112716999254  
CGCGCAAG 0.151969664898  
CGCGCACA 0.0668285365255  
CGCGCACC -0.277482833996

CGCGCACG -0.166594663074  
CGCGCAGA -0.18608722175  
CGCGCAGC -0.0235850227042  
CGCGCATA 0.0608650905455  
CGCGCATC -0.02617095976  
CGCGCCAA -0.151838036989  
CGCGCCAC -0.257150653668  
CGCGCCAG -0.0909692413303  
CGCGCCCA -0.178575859075  
CGCGCCCC -0.213260492571  
CGCGCCCG -0.11756076712  
CGCGCCGA -0.216902734298  
CGCGCCGC -0.049483321631  
CGCGCCTA 0.0697670853923  
CGCGCCTC -0.156408772002  
CGCGCGAA 0.173802763443  
CGCGCGAC 0.026882254155  
CGCGCGAG -0.18036631673  
CGCGCGCA 0.0371026379135  
CGCGCGCC -0.126323030308  
CGCGCGCG 0.2830313755  
CGCGCGGA -0.0803323985142  
CGCGCGGC 0.00108818931429  
CGCGCGTA 0.235961857174  
CGCGCGTC -0.0919140456778  
CGCGCTAA -0.165189473392  
CGCGCTAC -0.325443938087  
CGCGCTAG -0.252797142077  
CGCGCTCA -0.0921130989305  
CGCGCTCC -0.0601366523584  
CGCGCTGA 0.0923885317825  
CGCGCTGC 0.0763975971329  
CGCGCTTA 0.109504821626  
CGCGCTTC -0.242533768252  
CGCGGAAA 0.211197565017  
CGCGGAAC -0.333691577397  
CGCGGAAG -0.194826906591  
CGCGGACA -0.153086990981  
CGCGGACC -0.190534622533  
CGCGGACG -0.160723642823  
CGCGGAGA -0.12570125019  
CGCGGAGC -0.157472174219  
CGCGGATA 0.235595099231  
CGCGGATC 0.218301059101  
CGCGGCAA 0.0878881636457  
CGCGGCAC -0.133232711685  
CGCGGCAG 0.024904281671  
CGCGGCCA -0.242026181084  
CGCGGCCC -0.0809883567332  
CGCGGCCG 0.082306956782  
CGCGGCGA -0.0376574809184  
CGCGGCGC 0.173365883316  
CGCGGCTA -0.0251217735661  
CGCGGCTC -0.380501346018

CGCGGGAA -0.0150011167084  
CGCGGGAC -0.250411405228  
CGCGGGAG -0.191777706095  
CGCGGGCA -0.0957865787703  
CGCGGGCC -0.300522357027  
CGCGGGGA -0.0695647318659  
CGCGGGGC -0.175026606337  
CGCGGGTA -0.121823555522  
CGCGGGTC -0.159421608108  
CGCGGTAA -0.109223391319  
CGCGGTAC -0.0393993714318  
CGCGGTAG -0.227610475611  
CGCGGTCA -0.235720946115  
CGCGGTCC -0.436513193892  
CGCGGTGA -0.0687836596928  
CGCGGTGC -0.208911032714  
CGCGGTTA -0.0869925936035  
CGCGGTTC 0.0155522141851  
CGCGTAAA 0.0798529959198  
CGCGTAAC -0.00157595612141  
CGCGTAAG -0.100659609067  
CGCGTACA -0.0292468048145  
CGCGTACC -0.161061506416  
CGCGTACG 0.177454313818  
CGCGTAGA -0.132896981833  
CGCGTAGC 0.0467369327679  
CGCGTATA 0.213942725265  
CGCGTATC 0.324015532507  
CGCGTCAA -0.022908825192  
CGCGTCAC -0.133673792885  
CGCGTCAG -0.0751934842607  
CGCGTCCA -0.0735046341107  
CGCGTCCC -0.236999820811  
CGCGTCCG 0.0515956728078  
CGCGTCGA -0.10010134266  
CGCGTCGC 0.129362144514  
CGCGTCTA -0.10165397838  
CGCGTCTC -0.207881614528  
CGCGTGAA 0.0818766424827  
CGCGTGAC -0.286197040234  
CGCGTGAG -0.143512336084  
CGCGTGCA 0.0261054318742  
CGCGTGCC -0.125926661098  
CGCGTGGA -0.0625278278578  
CGCGTGGC 0.0732000518348  
CGCGTGTA -0.131701469019  
CGCGTGTC -0.159756511095  
CGCGTTAA -0.08622657898  
CGCGTTAC -0.0824806791456  
CGCGTTAG -0.213942301065  
CGCGTTCA -0.0873714942643  
CGCGTTCC -0.159343706716  
CGCGTTGA -0.0360985457237  
CGCGTTGC 0.0438873601308

CGCGTTTA -0.0120023604872  
CGCGTTTC 0.154781282162  
CGCTAAAA 0.0529692036628  
CGCTAAAC -0.0515715276626  
CGCTAAAG 0.180091676825  
CGCTAACA -0.0772603519631  
CGCTAACC -0.242529772198  
CGCTAACG -0.235499516237  
CGCTAAGA -0.0469794863734  
CGCTAAGC 0.0528944621651  
CGCTAATA -0.0223279648609  
CGCTAATC -0.0513120634842  
CGCTACAA -0.0870998343513  
CGCTACAC -0.127778742739  
CGCTACAG 0.000314161841028  
CGCTACCA -0.164508968579  
CGCTACCC -0.110530402885  
CGCTACCG -0.0443029947087  
CGCTACGA -0.0703727825332  
CGCTACGC -0.0765331303957  
CGCTACTA -0.0746131806738  
CGCTACTC -0.242984393221  
CGCTAGAA 0.143981447012  
CGCTAGAC -0.241922727266  
CGCTAGAG -0.00259045422363  
CGCTAGCA -0.21088684078  
CGCTAGCC -0.324672888503  
CGCTAGCG -0.133805655463  
CGCTAGGA 0.0532336957712  
CGCTAGGC -0.181403476856  
CGCTAGTA -0.179824670223  
CGCTAGTC 0.0588067406249  
CGCTATAA 0.224083607545  
CGCTATAC -0.104744242668  
CGCTATAG -0.0899096269026  
CGCTATCA -0.0296890121343  
CGCTATCC 0.162089151332  
CGCTATGA 0.11322170682  
CGCTATGC 0.0550702217369  
CGCTATTA -0.104919403926  
CGCTATTC 0.129307387429  
CGCTCAAA 0.0580346186407  
CGCTCAAC 0.0254951921619  
CGCTCAAG -0.142449258699  
CGCTCACA -0.102105917675  
CGCTCACC -0.10451491416  
CGCTCACG -0.307762295214  
CGCTCAGA -0.159002900686  
CGCTCAGC -0.0339869929727  
CGCTCATA -0.134604939191  
CGCTCATC -0.136288013038  
CGCTCCAA -0.175710626377  
CGCTCCAC -0.308316863342  
CGCTCCAG -0.064441998917



CGCTCCCA -0.165253142476  
CGCTCCCC -0.094736972695  
CGCTCCCG -0.10385119023  
CGCTCCGA -0.225257261628  
CGCTCCGC -0.069814920501  
CGCTCCTA -0.0938872416445  
CGCTCCTC -0.204028930897  
CGCTCGAA -0.212418706079  
CGCTCGAC -0.237107316568  
CGCTCGAG -0.147739220498  
CGCTCGCA -0.0586741023796  
CGCTCGCC -0.19031137576  
CGCTCGGA -0.0704918756014  
CGCTCGGC -0.115668859153  
CGCTCGTA -0.132248839441  
CGCTCGTC -0.0991144876418  
CGCTCTAA -0.299729164569  
CGCTCTAC -0.0874688064414  
CGCTCTAG -0.0808511538905  
CGCTCTCA -0.301410492832  
CGCTCTCC -0.325743106371  
CGCTCTGA -0.0818050971536  
CGCTCTGC -0.0911821370028  
CGCTCTTA -0.035072262345  
CGCTCTTC -0.0197492025722  
CGCTGAAA 0.140688160113  
CGCTGAAC -0.195998861258  
CGCTGAAG -0.153149652071  
CGCTGACA -0.0468767349114  
CGCTGACC -0.175156292639  
CGCTGACG -0.0899636485447  
CGCTGAGA 0.0404219646644  
CGCTGAGC 0.0870820919379  
CGCTGATA 0.209728984037  
CGCTGATC 0.106973364549  
CGCTGCAA 0.045945709218  
CGCTGCAC -0.331454951675  
CGCTGCAG -0.0375648708422  
CGCTGCCA -0.277531084705  
CGCTGCCC -0.258203819816  
CGCTGCCG -0.155250933852  
CGCTGCGA -0.0879785861393  
CGCTGCGC 0.0810894651942  
CGCTGCTA -0.0386568177339  
CGCTGCTC -0.184124699843  
CGCTGGAA -0.0243701001277  
CGCTGGAC -0.086760314033  
CGCTGGAG -0.209072890502  
CGCTGGCA -0.157908522682  
CGCTGGCC -0.218336765326  
CGCTGGGA -0.163062557372  
CGCTGGGC -0.189346215527  
CGCTGGTA -0.158533096901  
CGCTGGTC -0.238126480587

CGCTGTAA -0.113397208805  
CGCTGTAC -0.2585242239  
CGCTGTAG -0.20955170831  
CGCTGTCA -0.280197970677  
CGCTGTCC -0.16476303115  
CGCTGTGA 0.150241235593  
CGCTGTGC -0.0196032210557  
CGCTGTTA -0.0696667631771  
CGCTGTTC -0.100948190057  
CGCTTAAA 0.0296745326745  
CGCTTAAC -0.179934788098  
CGCTTAAG -0.0617421538704  
CGCTTACA -0.0987970298  
CGCTTACC 0.0360015663046  
CGCTTACG -0.000990390945331  
CGCTTAGA -0.098384425477  
CGCTTAGC 0.0198255891184  
CGCTTATA 0.0778428209601  
CGCTTATC 0.102370751005  
CGCTTCAA 0.158311203766  
CGCTTCAC -0.284800650271  
CGCTTCAG 0.0674352037988  
CGCTTCCA -0.147205681677  
CGCTTCCC -0.163647717592  
CGCTTCCG -0.120929142892  
CGCTTCGA 0.0294686949401  
CGCTTCGC -0.113831918906  
CGCTTCTA -0.235162721333  
CGCTTCTC 0.0774428297191  
CGCTTGAA -0.0576462997914  
CGCTTGAC -0.0558492230908  
CGCTTGAG -0.124919701469  
CGCTTGCA -0.132210286055  
CGCTTGCC -0.229273414777  
CGCTTGGA -0.1214725225  
CGCTTGGC -0.0443282054875  
CGCTTGTA -0.212789290963  
CGCTTGTC -0.148157395231  
CGCTTTAA -0.0162792823976  
CGCTTTAC -0.163512309987  
CGCTTTAG -0.0815870967386  
CGCTTTCA -0.0650067593602  
CGCTTTCC -0.140772349992  
CGCTTTGA 0.0545236235703  
CGCTTTGC 0.00166930651154  
CGCTTTTA 0.0550523224552  
CGCTTTTC 0.184261212738  
CGGAAAAA -0.052700158975  
CGGAAAAC 0.158787033861  
CGGAAAAG -0.0646279888704  
CGGAAACA -0.0720734508613  
CGGAAACC -0.205924032765  
CGGAAACG -0.0667112863459  
CGGAAAGA -0.0886674014438

CGGAAAGC -0.0512208009832  
CGGAAATA 0.266809563987  
CGGAAATC 0.468877968878  
CGGAACAA -0.159350423003  
CGGAACAC -0.232075362463  
CGGAACAG -0.0092172061869  
CGGAACCA -0.143411288142  
CGGAACCC -0.298068546463  
CGGAACCG -0.119118075316  
CGGAACGA -0.0757871673943  
CGGAACGC -0.14455730934  
CGGAACTA -0.193880023412  
CGGAACTC -0.207573388918  
CGGAAGAA -0.265287806976  
CGGAAGAC -0.224963817558  
CGGAAGAG -0.173857166002  
CGGAAGCA -0.0940191090706  
CGGAAGCC -0.277514494372  
CGGAAGGA -0.0831940696284  
CGGAAGGC -0.152015803302  
CGGAAGTA 0.143505764718  
CGGAAGTC -0.209587982014  
CGGAATAA 0.0531894433829  
CGGAATAC 0.0912615052225  
CGGAATAG 0.0929957738152  
CGGAATCA 0.3239423997  
CGGAATCC 0.435925751297  
CGGAATGA -0.262932902565  
CGGAATGC -0.150000364956  
CGGAATTA 0.0970957183078  
CGGAATTC 0.0274006789158  
CGGACAAA -0.0520200287585  
CGGACAAC 0.0256118479157  
CGGACAAG -0.118287095489  
CGGACACA -0.155439042011  
CGGACACC -0.277707476973  
CGGACACG -0.125219842049  
CGGACAGA -0.0114875018957  
CGGACAGC -0.276858201538  
CGGACATA -0.182097584482  
CGGACATC -0.198521404211  
CGGACCAA -0.0668880782413  
CGGACCAC -0.295521762739  
CGGACCAG -0.297385458785  
CGGACCCA -0.0605887656435  
CGGACCCC -0.232396360107  
CGGACCCG -0.0578967397149  
CGGACCGA -0.191127864322  
CGGACCGC -0.392992071956  
CGGACCTA -0.0771408387181  
CGGACCTC -0.241037092172  
CGGACGAA -0.164730795501  
CGGACGAC -0.339596997191  
CGGACGAG -0.160491692025

CGGACGCA -0.0971909841772  
CGGACGCC -0.335261108043  
CGGACGGA -0.108493310064  
CGGACGGC -0.151825568155  
CGGACGTA -0.0372300387934  
CGGACGTC -0.0521852522696  
CGGACTAA -0.111788029437  
CGGACTAC -0.173180884643  
CGGACTAG -0.249525381337  
CGGACTCA -0.044502350719  
CGGACTCC -0.0980972855495  
CGGACTGA -0.244443844563  
CGGACTGC -0.159920038886  
CGGACTTA 0.0588738932724  
CGGACTTC -0.259748099999  
CGGAGAAA 0.0149113523062  
CGGAGAAC -0.0925855638198  
CGGAGAAG -0.248781836781  
CGGAGACA -0.192933052144  
CGGAGACC -0.180056854913  
CGGAGACG -0.250918735027  
CGGAGAGA -0.0659011799733  
CGGAGAGC -0.250638148821  
CGGAGATA 0.241545953667  
CGGAGATC 0.317860922754  
CGGAGCAA -0.106007167726  
CGGAGCAC -0.161288810585  
CGGAGCAG 0.0576572657912  
CGGAGCCA -0.187273316393  
CGGAGCCC -0.376680250194  
CGGAGCCG -0.27715131409  
CGGAGCGA -0.178359671537  
CGGAGCGC -0.194078529653  
CGGAGCTA -0.29821155224  
CGGAGCTC -0.454914588207  
CGGAGGAA -0.0447069624604  
CGGAGGAC -0.408695099571  
CGGAGGAG -0.179293414882  
CGGAGGCA -0.315864116368  
CGGAGGCC -0.208842198684  
CGGAGGGA -0.222814785196  
CGGAGGGC -0.334819004463  
CGGAGGTA -0.159746175119  
CGGAGGTC -0.412767736128  
CGGAGTAA -0.0332870152105  
CGGAGTAC -0.271059739979  
CGGAGTAG -0.0421730270215  
CGGAGTCA 0.00130847100544  
CGGAGTCC -0.274226453587  
CGGAGTGA -0.138569497326  
CGGAGTGC -0.345750758441  
CGGAGTTA -0.00286782041269  
CGGAGTTC -0.225137006794  
CGGATAAA -0.0193842470603

CGGATAAC -0.0444940688073  
CGGATAAG -0.173226696662  
CGGATACA 0.136176121025  
CGGATACC 0.28843674956  
CGGATACG 0.389065202952  
CGGATAGA 0.0235637175828  
CGGATAGC 0.0352294443204  
CGGATATA 0.283436328891  
CGGATATC 0.460292840303  
CGGATCAA -0.0115832085529  
CGGATCAC 0.239617713477  
CGGATCAG 0.106543182301  
CGGATCCA 0.144702670744  
CGGATCCC 0.196533999564  
CGGATCCG 0.325539761686  
CGGATCGA 0.014873936025  
CGGATCGC 0.402974599944  
CGGATCTA 0.184882812785  
CGGATCTC 0.359158830038  
CGGATGAA 0.0371376886528  
CGGATGAC -0.238639763346  
CGGATGAG -0.0859440707926  
CGGATGCA -0.131959020065  
CGGATGCC -0.147873282958  
CGGATGGA -0.145283133311  
CGGATGGC -0.178151239654  
CGGATGTA -0.00661785994954  
CGGATGTC 0.0436676345767  
CGGATTAA -0.125999232286  
CGGATTAC 0.457246502701  
CGGATTAG -0.0296065601796  
CGGATTCA 0.285017846325  
CGGATTCC 0.462453376933  
CGGATTGA -0.134157573552  
CGGATTGC 0.431540185251  
CGGATTTA 0.266186141909  
CGGATTTT 0.480073737649  
CGGCAAAA 0.0756693332451  
CGGCAAAC -0.0452826852932  
CGGCAAAG 0.131923388539  
CGGCAACA -0.188571099167  
CGGCAACC -0.335335918915  
CGGCAACG -0.214970409451  
CGGCAAGA -0.0816863787462  
CGGCAAGC -0.203719323779  
CGGCAATA 0.108349396228  
CGGCAATC 0.326841747991  
CGGCACAA 0.0956562623229  
CGGCACAC -0.134308982246  
CGGCACAG 0.00119253432155  
CGGCACCA -0.304300603976  
CGGCACCC -0.320661147912  
CGGCACCG -0.16842027689  
CGGCACGA -0.106444974715

CGGCACGC -0.291485772408  
CGGCACTA -0.196938868349  
CGGCACTC -0.182572684875  
CGGCAGAA 0.0592505273607  
CGGCAGAC -0.209793123173  
CGGCAGAG 0.0651252567868  
CGGCAGCA -0.313038498297  
CGGCAGCC -0.23347550202  
CGGCAGGA -0.0910657326309  
CGGCAGGC -0.215167513757  
CGGCAGTA -0.0408557146441  
CGGCAGTC -0.208516416564  
CGGCATAA 0.0784324269173  
CGGCATAC -0.282753562906  
CGGCATAG 0.0829872338562  
CGGCATCA -0.126978971263  
CGGCATCC 0.00460646847149  
CGGCATGA -0.0624791094076  
CGGCATGC 0.122371682978  
CGGCATTA -0.197495637215  
CGGCATTC -0.137475221183  
CGGCCAAA -0.160504572599  
CGGCCAAC -0.0390459329853  
CGGCCAAG -0.221801591924  
CGGCCACA -0.198479331563  
CGGCCACC -0.353330006755  
CGGCCACG -0.175068916152  
CGGCCAGA -0.18985403196  
CGGCCAGC -0.141754417892  
CGGCCATA -0.115294150088  
CGGCCATC -0.302158541124  
CGGCCCAA -0.165672831237  
CGGCCCAC -0.252641725027  
CGGCCCAG -0.151475917184  
CGGCCCCA -0.113107055116  
CGGCCCCC -0.192315101138  
CGGCCCCG -0.0829787102057  
CGGCCCGA -0.288746661374  
CGGCCCGC -0.143240605173  
CGGCCCTA -0.0928637006526  
CGGCCCTC -0.399375161389  
CGGCCGAA 0.106148848573  
CGGCCGAC -0.24490005881  
CGGCCGAG -0.122621874594  
CGGCCGCA -0.235856468273  
CGGCCGCC -0.177476785946  
CGGCCGGA 0.0617594913324  
CGGCCGGC -0.146949336876  
CGGCCGTA 0.0375721699525  
CGGCCGTC -0.320596916065  
CGGCCTAA -0.258013926857  
CGGCCTAC -0.298677780258  
CGGCCTAG -0.347275623799  
CGGCCTCA -0.0898092315497

CGGCCTCC -0.116930118374  
CGGCCTGA -0.185925797284  
CGGCCTGC -0.409421338205  
CGGCCTTA -0.199371702533  
CGGCCTTC -0.264085504611  
CGGCGAAA -0.0155449128873  
CGGCGAAC -0.187494071239  
CGGCGAAG 0.0538934698423  
CGGCGACA -0.117431777812  
CGGCGACC -0.186050261728  
CGGCGACG -0.0513522530198  
CGGCGAGA -0.0500982832819  
CGGCGAGC -0.110366919045  
CGGCGATA 0.10397071597  
CGGCGATC 0.150516179008  
CGGCGCAA 0.224041079392  
CGGCGCAC -0.0925228859926  
CGGCGCAG 0.170515244192  
CGGCGCCA -0.0896365841803  
CGGCGCCC -0.110671364648  
CGGCGCCG -0.355010155628  
CGGCGCGA -0.0377254512675  
CGGCGCGC -0.133331241233  
CGGCGCTA -0.216314147802  
CGGCGCTC -0.283735350301  
CGGCGGAA -0.0892922052802  
CGGCGGAC -0.334775236714  
CGGCGGAG -0.136377922798  
CGGCGGCA -0.2196807711  
CGGCGGCC -0.342352550907  
CGGCGGGA -0.20672432828  
CGGCGGGC -0.269569124989  
CGGCGGTA 0.0115084636616  
CGGCGGTC -0.365099109221  
CGGCGTAA -0.0985648663933  
CGGCGTAC -0.353038459312  
CGGCGTAG -0.130224366975  
CGGCGTCA -0.211706135454  
CGGCGTCC 0.0200056051603  
CGGCGTGA -0.159352989014  
CGGCGTGC -0.184463857821  
CGGCGTTA -0.130144303956  
CGGCGTTC -0.274176886431  
CGGCTAAA -0.162514577802  
CGGCTAAC -0.187152855304  
CGGCTAAG 0.024869366202  
CGGCTACA -0.212741473894  
CGGCTACC -0.207493516671  
CGGCTACG -0.0886220893658  
CGGCTAGA -0.095644615324  
CGGCTAGC -0.270792383337  
CGGCTATA -0.0399933273224  
CGGCTATC -0.0393989030353  
CGGCTCAA -0.207398581254

CGGCTCAC -0.288335111265  
CGGCTCAG -0.135419935573  
CGGCTCCA -0.108869725901  
CGGCTCCC -0.276290809544  
CGGCTCGA -0.0637676950045  
CGGCTCGC -0.322434979797  
CGGCTCTA -0.238691964097  
CGGCTCTC -0.204290404479  
CGGCTGAA -0.0708910672678  
CGGCTGAC -0.214790935056  
CGGCTGAG -0.211175288543  
CGGCTGCA -0.305152399776  
CGGCTGCC -0.245190147349  
CGGCTGGA -0.146489581352  
CGGCTGGC -0.189936417644  
CGGCTGTA 0.00987642606366  
CGGCTGTC -0.289782966845  
CGGCTTAA -0.0591964769232  
CGGCTTAC -0.378971649676  
CGGCTTAG -0.0282806271902  
CGGCTTCA -0.243012471084  
CGGCTTCC -0.227529243756  
CGGCTTGA -0.170876235372  
CGGCTTGC -0.340753693645  
CGGCTTTA -0.2391680518  
CGGCTTTC -0.309830385127  
CGGGAAAA -0.01585635222  
CGGGAAAC -0.0735545924452  
CGGGAAAG -0.0789799400711  
CGGGAACA -0.211341003662  
CGGGAACG -0.309686349421  
CGGGAAGA -0.0889710079133  
CGGGAAGC -0.197489972295  
CGGGAATA 0.279496612651  
CGGGAATC 0.457919169653  
CGGGACAA -0.0221585221585  
CGGGACAC -0.0524005388861  
CGGGACAG -0.280614664801  
CGGGACCA -0.233733302783  
CGGGACCC -0.386092193054  
CGGGACCG -0.23721145655  
CGGGACGA -0.251256585676  
CGGGACGC -0.155451355293  
CGGGACTA -0.176443586888  
CGGGACTC -0.294569282651  
CGGGAGAA 0.0349620081312  
CGGGAGAC -0.190289395826  
CGGGAGAG -0.31633716171  
CGGGAGCA -0.148701123333  
CGGGAGCC -0.270306733425  
CGGGAGGA 0.0608475726809  
CGGGAGGC -0.20268921323  
CGGGAGTA -0.0235885345576



CGGGAGTC -0.231511116625  
CGGGATAA 0.129447629448  
CGGGATAC 0.132720451377  
CGGGATAG -0.230755765069  
CGGGATCA -0.159414144098  
CGGGATCC 0.19158414613  
CGGGATGA -0.249956578915  
CGGGATGC -0.142239869849  
CGGGATTA 0.319802486077  
CGGGATTC 0.373062633665  
CGGGCAAA 0.0164809253146  
CGGGCAAC -0.146257540309  
CGGGCAAG -0.384620491711  
CGGGCACA -0.193417106329  
CGGGCACC -0.418810370308  
CGGGCACG -0.0737421808282  
CGGGCAGA -0.136192780052  
CGGGCAGC -0.0893555050994  
CGGGCATA 0.0352983837832  
CGGGCATC -0.239124279975  
CGGGCCAA -0.130968627743  
CGGGCCAC -0.238884584123  
CGGGCCAG -0.233915726157  
CGGGCCCA -0.230280143319  
CGGGCCCC -0.386194538826  
CGGGCCCG -0.120100045475  
CGGGCCGA -0.133677836799  
CGGGCCGC -0.338805789144  
CGGGCCTA -0.315643679159  
CGGGCCTC -0.33754779658  
CGGGCGAA 0.02525127187  
CGGGCGAC -0.0684134780513  
CGGGCGAG -0.398404233329  
CGGGCGCA -0.208212228929  
CGGGCGCC -0.248856861724  
CGGGCGGA -0.122418256863  
CGGGCGGC -0.222329476555  
CGGGCGTA -0.145175921101  
CGGGCGTC -0.401847947414  
CGGGCTAA -0.0182786091877  
CGGGCTAC -0.184486347158  
CGGGCTAG -0.175884556944  
CGGGCTCA -0.35880806144  
CGGGCTCC -0.382282907954  
CGGGCTGA -0.0849266564182  
CGGGCTGC -0.112187731763  
CGGGCTTA -0.131564146465  
CGGGCTTC -0.261946697758  
CGGGGAAA 0.220163792034  
CGGGGAAC -0.142846310588  
CGGGGAAG -0.232167122842  
CGGGGACA -0.193207745784  
CGGGGACC -0.309639265239  
CGGGGACG -0.0198163543864

CGGGGAGA -0.0805507996769  
CGGGGAGC -0.0806584860688  
CGGGGATA 0.252893389257  
CGGGGATC 0.300737376495  
CGGGGCAA 0.141139762352  
CGGGGCAC -0.110824369936  
CGGGGCAG -0.138033523793  
CGGGGCCA -0.328275621581  
CGGGGCCC -0.0509033775036  
CGGGGCGA -0.114023768258  
CGGGGCGC -0.00404516689416  
CGGGGCTA -0.0533427459012  
CGGGGCTC -0.405199092791  
CGGGGGAA 0.0903727418879  
CGGGGGAC -0.0539495052262  
CGGGGGAG -0.0456325022006  
CGGGGGCA -0.191157133705  
CGGGGGCC -0.35326328089  
CGGGGGGA -0.0174847427246  
CGGGGGGC -0.193142694904  
CGGGGGTA -0.0120173885372  
CGGGGGTC -0.39214105742  
CGGGGTAA 0.0924206039284  
CGGGGTAC -0.156526809419  
CGGGGTAG -0.226171865307  
CGGGGTCA -0.167883714712  
CGGGGTCC -0.201503460937  
CGGGGTGA -0.054798195985  
CGGGGTGC -0.0703313066137  
CGGGGTTA -0.14116148457  
CGGGGTTC -0.196978593778  
CGGGTAAA -0.00247768429587  
CGGGTAAC -0.0212722009666  
CGGGTAAG -0.235490395518  
CGGGTACA -0.135436950897  
CGGGTACC -0.125152685753  
CGGGTACG -0.123171380747  
CGGGTAGA 0.00114973903405  
CGGGTAGC -0.120893035089  
CGGGTATA -0.107714211904  
CGGGTATC 0.186453581308  
CGGGTCAA -0.16408718662  
CGGGTCAC -0.291799295081  
CGGGTCAG -0.276997692823  
CGGGTCCA -0.184387709091  
CGGGTCCC -0.369834340628  
CGGGTCGA -0.140125273818  
CGGGTCGC -0.192773643042  
CGGGTCTA -0.236906740765  
CGGGTCTC -0.358325271418  
CGGGTGAA -0.0199681758794  
CGGGTGAC -0.0847279094456  
CGGGTGAG -0.154001129566  
CGGGTGCA -0.306628463695

CGGGTGCC -0.401526945889  
CGGGTGGA -0.132387853521  
CGGGTGGC -0.212301144273  
CGGGTGTA -0.0373002515149  
CGGGTGTC -0.212295631032  
CGGGTTAA -0.0324054542196  
CGGGTTAC 0.042554697752  
CGGGTTAG -0.27771024057  
CGGGTTCA -0.263180822482  
CGGGTTCC -0.311891374427  
CGGGTTGA 0.0139989635263  
CGGGTTGC -0.114624091768  
CGGGTTTA -0.0373838529083  
CGGGTTTC -0.317590869619  
CGGTAAAA 0.136076848198  
CGGTAAAC 0.0897109230443  
CGGTAAAG -0.0687729465778  
CGGTAAACA -0.114496749622  
CGGTAAACC -0.118832869955  
CGGTAAACG -0.137537633636  
CGGTAAAGA 0.108823699733  
CGGTAAAGC -0.204012935348  
CGGTAAATA -0.0131219373644  
CGGTAAATC 0.368919658694  
CGGTACAA 0.139794064036  
CGGTACAC -0.133530175587  
CGGTACAG -0.167346221031  
CGGTACCA -0.279157740335  
CGGTACCC -0.257672745317  
CGGTACCG 0.164301838117  
CGGTACGA -0.0208545269583  
CGGTACGC -0.242690493714  
CGGTACTA -0.0787415539431  
CGGTACTC -0.165041316162  
CGGTAGAA 0.193828602293  
CGGTAGAC -0.0811542650729  
CGGTAGAG -0.171411370652  
CGGTAGCA -0.174103117685  
CGGTAGCC -0.194671338652  
CGGTAGGA 0.143673977007  
CGGTAGGC -0.0568553501345  
CGGTAGTA -0.0255835435883  
CGGTAGTC -0.26947846332  
CGGTATAA 0.141649108002  
CGGTATAC 0.0250236462358  
CGGTATAG -0.0423432739105  
CGGTATCA 0.203781669015  
CGGTATCC 0.308430472325  
CGGTATGA -0.109484868966  
CGGTATGC -0.113306941997  
CGGTATTA 0.0643053521841  
CGGTATTC -0.0591176835544  
CGGTCAAA 0.137946486431  
CGGTCAAC -0.161656340988

CGGTCAAG -0.197256517177  
CGGTCACA -0.100258306486  
CGGTCACC -0.295937871614  
CGGTCACG -0.129318787886  
CGGTCAGA -0.197002026217  
CGGTCAGC -0.151154067879  
CGGTCATA -0.0223000471499  
CGGTCATC -0.309690002619  
CGGTCCAA -0.161882568963  
CGGTCCAC -0.239107659308  
CGGTCCAG -0.145346792167  
CGGTCCCA -0.160926527878  
CGGTCCCC -0.147806066975  
CGGTCCGA -0.278220389106  
CGGTCCGC -0.363049416097  
CGGTCCTA -0.164127693007  
CGGTCCTC -0.325111539672  
CGGT CGAA -0.150625463549  
CGGT CGAC -0.343089099895  
CGGT CGAG -0.201159549744  
CGGT CGCA -0.10135065117  
CGGT CGCC -0.158580687342  
CGGT CGGA 0.00658433579917  
CGGT CGGC -0.232043332132  
CGGT CGTA -0.129296619037  
CGGT CGTC -0.340899707188  
CGGTCTAA 0.109700609701  
CGGTCTAC -0.0658383560884  
CGGTCTAG -0.195972128772  
CGGTCTCA -0.118021447432  
CGGTCTCC -0.307917064879  
CGGTCTGA -0.101151336195  
CGGTCTGC -0.118742437798  
CGGTCTTA -0.188543109475  
CGGTCTTC -0.3235717319  
CGGTGAAA 0.164477149326  
CGGTGAAC -0.215895675826  
CGGTGAAG -0.105975121127  
CGGTGACA -0.128657766618  
CGGTGACC -0.402621722846  
CGGTGACG -0.15038364088  
CGGTGAGA 0.0381191710374  
CGGTGAGC -0.151265890838  
CGGTGATA 0.119222785812  
CGGTGATC 0.121423075969  
CGGTGCAA 0.141313489798  
CGGTGCAC 0.101404916518  
CGGTGCAG -0.151344683885  
CGGTGCCA -0.207544673497  
CGGTGCCC -0.245262058148  
CGGTGCGA -0.00762556964329  
CGGTGCGC -0.336672482271  
CGGTGCTA -0.188389615331  
CGGTGCTC -0.256582278666

CGGTGGAA 0.236593342654  
CGGTGGAC -0.369498948506  
CGGTGGAG -0.239540170707  
CGGTGGCA -0.235361969063  
CGGTGGCC -0.313978978048  
CGGTGGGA -0.0587402425877  
CGGTGGGC -0.0963686151897  
CGGTGGTA -0.141430587768  
CGGTGGTC -0.370496696682  
CGGTGTAA 0.199113158106  
CGGTGTAC -0.0292012363755  
CGGTGTAG -0.0599614042207  
CGGTGTCA -0.0993708166974  
CGGTGTCC -0.00223998575284  
CGGTGTGA -0.252165773411  
CGGTGTGC -0.127409281686  
CGGTGTTA 0.0921373984511  
CGGTGTTC -0.165705841322  
CGGTTAAA 0.144416545623  
CGGTTAAC -0.0835964411538  
CGGTTAAG 0.00371305737831  
CGGTTACA 0.13038630803  
CGGTTACC -0.0727342131731  
CGGTTACG 0.0689962993511  
CGGTTAGA -0.176299789056  
CGGTTAGC -0.080074888871  
CGGTTATA -0.137363150605  
CGGTTATC -0.0286250437766  
CGGTTCAA 0.0906892549798  
CGGTTCAC -0.0545587404007  
CGGTTCAG -0.176013916802  
CGGTTCCA -0.36216915139  
CGGTTCCC -0.223334301346  
CGGTTCGA -0.228570657257  
CGGTTCGC -0.267741257609  
CGGTTCTA -0.0946192883029  
CGGTTCTC -0.117256838466  
CGGTTGAA 0.0648182886506  
CGGTTGAC -0.214647279224  
CGGTTGAG -0.276775746148  
CGGTTGCA -0.104555618974  
CGGTTGCC -0.309293040726  
CGGTTGGA -0.111865408612  
CGGTTGGC -0.173445533364  
CGGTTGTA -0.0296331794834  
CGGTTGTC -0.0914225762602  
CGGTTTAA 0.0340306416648  
CGGTTTAC -0.0426808591585  
CGGTTTAG -0.0540642520687  
CGGTTTCA -0.0929917729281  
CGGTTTCC -0.0651574439453  
CGGTTTGA -0.0276130451684  
CGGTTTGC -0.187858824697  
CGGTTTTA -0.0324379758107

CGGTTTTTC 0.0368771137344  
CGTAAAAA 0.220207586695  
CGTAAAAC -0.137954759167  
CGTAAAAG 0.0974949453662  
CGTAAACA 0.0671744336088  
CGTAAACC -0.157841345451  
CGTAAACG -0.144472843274  
CGTAAAGA -0.0359611137306  
CGTAAAGC -0.084742460047  
CGTAAATA 0.0355382931141  
CGTAAATC 0.239952726009  
CGTAACAA 0.183959441535  
CGTAACAC 0.0478580761005  
CGTAACAG 0.0326839348999  
CGTAACCA 0.122360652664  
CGTAACCC 0.0873090721576  
CGTAACGA -0.05256370396  
CGTAACGC 0.115231783246  
CGTAACTA -0.0137396349518  
CGTAACTC 0.0119610519478  
CGTAAGAA 0.147596038043  
CGTAAGAC -0.134839298466  
CGTAAGAG -0.0759717363196  
CGTAAGCA -0.095253064207  
CGTAAGCC -0.214889538581  
CGTAAGGA 0.0377181521573  
CGTAAGGC 0.0493395747104  
CGTAAGTA 0.0576678606982  
CGTAAGTC 0.00477198962047  
CGTAATAA 0.272444936769  
CGTAATAC 0.283213506274  
CGTAATAG 0.0842743570016  
CGTAATCA 0.396209572053  
CGTAATCC 0.490296081205  
CGTAATGA -0.0115590271645  
CGTAATGC -0.0166456208988  
CGTAATTA 0.0978871433417  
CGTAATTC 0.234607886123  
CGTACAAA 0.200526041469  
CGTACAAC -0.054664611647  
CGTACAAG -0.113918186706  
CGTACACA 0.0261294352203  
CGTACACC -0.175337819748  
CGTACACG -0.0261549017175  
CGTACAGA -0.202713708365  
CGTACAGC -0.142903815455  
CGTACATA 0.00146493142486  
CGTACATC -0.0548979710001  
CGTACCAA -0.0832995546732  
CGTACCAC -0.165788379941  
CGTACCAG -0.145326926311  
CGTACCCA 0.023694696061  
CGTACCCC -0.140998706952  
CGTACCGA -0.25937462053

CGTACCGC -0.0449172248992  
CGTACCTA -0.195217021326  
CGTACCTC -0.205197243798  
CGTACGAA 0.0457500930637  
CGTACGAC -0.28111157969  
CGTACGAG -0.0379631643244  
CGTACGCA -0.0436012606397  
CGTACGCC -0.325842196576  
CGTACGGA -0.0208265512434  
CGTACGGC -0.0393276703914  
CGTACGTA 0.0798456968096  
CGTACGTC 0.0658168069312  
CGTACTAA 0.205256089283  
CGTACTAC 0.115923738896  
CGTACTAG -0.0730050227491  
CGTACTCA -0.120354057936  
CGTACTCC -0.137339810729  
CGTACTGA -0.0305838854562  
CGTACTGC -0.0524306158626  
CGTACTTA -0.13788586949  
CGTACTTC -0.226500922181  
CGTAGAAA 0.173615906221  
CGTAGAAC -0.212794354809  
CGTAGAAG -0.046333319835  
CGTAGACA 0.013516271092  
CGTAGACC -0.282453492971  
CGTAGACG -0.26984107293  
CGTAGAGA 0.0678846890968  
CGTAGAGC -0.177422067805  
CGTAGATA 0.209025830238  
CGTAGATC 0.162267530035  
CGTAGCAA 0.204907386726  
CGTAGCAC -0.0858953155176  
CGTAGCAG 0.0100619045649  
CGTAGCCA -0.282923415725  
CGTAGCCC -0.147515657133  
CGTAGCGA -0.108402652394  
CGTAGCGC -0.162612759099  
CGTAGCTA -0.201037919199  
CGTAGCTC -0.0618801849416  
CGTAGGAA -0.0252718283021  
CGTAGGAC -0.222791436156  
CGTAGGAG -0.215912756507  
CGTAGGCA -0.112844974198  
CGTAGGCC -0.435644669295  
CGTAGGGA -0.1392312607  
CGTAGGGC -0.0457534990374  
CGTAGGTA -0.0867567145466  
CGTAGGTC -0.137708528222  
CGTAGTAA 0.0187473975353  
CGTAGTAC 0.0888919222253  
CGTAGTAG -0.0831480667806  
CGTAGTCA 0.0369853214893  
CGTAGTCC -0.246767909874

CGTAGTGA -0.237847351432  
CGTAGTGC -0.159009838954  
CGTAGTTA -0.151336197157  
CGTAGTTC -0.195339628122  
CGTATAAA 0.224222097326  
CGTATAAC -0.010657303789  
CGTATAAG 0.048631275904  
CGTATACA 0.200333942758  
CGTATACC 0.00333642329  
CGTATACG 0.23743581475  
CGTATAGA 0.0705057553484  
CGTATAGC 0.130556995102  
CGTATATA 0.0427983328832  
CGTATATC 0.120206856784  
CGTATCAA 0.215493469222  
CGTATCAC 0.178045814409  
CGTATCAG 0.279169799201  
CGTATCCA 0.338422444483  
CGTATCCC 0.211256711257  
CGTATCGA 0.0549351003896  
CGTATCGC 0.229962117618  
CGTATCTA 0.36549491617  
CGTATCTC 0.368472953147  
CGTATGAA 0.104805734181  
CGTATGAC -0.137805086705  
CGTATGAG -0.309004388468  
CGTATGCA -0.0678846890968  
CGTATGCC -0.195521593988  
CGTATGGA -0.0647438377262  
CGTATGGC -0.104536281764  
CGTATGTA 0.152833957863  
CGTATGTC -0.139029936467  
CGTATTAA 0.183559592651  
CGTATTAC 0.228643243795  
CGTATTAG 0.0356485962547  
CGTATTCA -0.0189640105078  
CGTATTCC 0.188494412531  
CGTATTGA 0.014420756845  
CGTATTGC -0.0239978270281  
CGTATTTA 0.167618957249  
CGTATTTC 0.226624696322  
CGTCAAAA 0.1883863857  
CGTCAAAC -0.171201279453  
CGTCAAAG -0.0409925330102  
CGTCAACA -0.0254629460669  
CGTCAACC -0.08141815714  
CGTCAACG -0.163503373709  
CGTCAAGA -0.00337389731329  
CGTCAAGC -0.0211243549411  
CGTCAATA -0.13424375019  
CGTCAATC -0.0800446391426  
CGTCACAA 0.0965304147122  
CGTCACAC -0.168399045513  
CGTCACAG 0.0606798621153



CGTCACCA -0.114302823238  
CGTCACCC -0.054361583323  
CGTCACGA -0.209456311697  
CGTCACGC -0.237890169466  
CGTCACTA -0.153237512717  
CGTCACTC -0.136711631613  
CGTCAGAA 0.165712429655  
CGTCAGAC -0.159424213281  
CGTCAGAG -0.251959398033  
CGTCAGCA -0.12829573075  
CGTCAGCC -0.313405138758  
CGTCAGGA 0.16740582323  
CGTCAGGC 0.0058035225506  
CGTCAGTA 0.0585888919222  
CGTCAGTC -0.1263720357  
CGTCATAA 0.129359941023  
CGTCATAC -0.226117713873  
CGTCATAG -0.219124834542  
CGTCATCA -0.148902395768  
CGTCATCC -0.0537922527244  
CGTCATGA -0.0129159052106  
CGTCATGC -0.111111111111  
CGTCATTA -0.121110369431  
CGTCATTC -0.0916460517962  
CGTCCAAA -0.0204129749584  
CGTCCAAC -0.266097615444  
CGTCCAAG -0.196851663483  
CGTCCACA -0.122809719495  
CGTCCACC -0.19630588644  
CGTCCACG 0.034531776956  
CGTCCAGA -0.0803126728376  
CGTCCAGC -0.143767734677  
CGTCCATA 0.0861426164456  
CGTCCATC -0.282085734682  
CGTCCCAA 0.0547187135519  
CGTCCCAC -0.302365297937  
CGTCCCAG -0.147730175062  
CGTCCCCA -0.193384395022  
CGTCCCCC -0.115905020602  
CGTCCCCG -0.167971651241  
CGTCCCCG -0.201524459989  
CGTCCCTA -0.0674324026457  
CGTCCCTC -0.0666608769013  
CGTCCGAA -0.133075044771  
CGTCCGAC -0.167425943385  
CGTCCGAG -0.247972118175  
CGTCCGCA 0.0482810634326  
CGTCCGCC -0.385669635105  
CGTCCGGA -0.0144172168706  
CGTCCGGC -0.30059919475  
CGTCCGTA -0.0386229468419  
CGTCCGTC -0.167543315552  
CGTCCTAA 0.0956274660645  
CGTCCTAC -0.00084442323047

CGTCCTAG -0.157322695372  
CGTCCTCA -0.306059302995  
CGTCCTCC -0.412163709759  
CGTCCTGA -0.137042000678  
CGTCCTGC -0.208342636928  
CGTCCTTA -0.15254718672  
CGTCCTTC -0.2330418884  
CGTCGAAA 0.131920468895  
CGTCGAAC -0.112787718848  
CGTCGAAG -0.278089291375  
CGTCGACA -0.133143640179  
CGTCGACC -0.306947851709  
CGTCGACG -0.0407560836455  
CGTCGAGA -0.12030361002  
CGTCGAGC -0.174969053861  
CGTCGATA 0.0674196915396  
CGTCGATC -0.0510197891765  
CGTCGCAA 0.104452564707  
CGTCGCAC -0.104928793184  
CGTCGCAG 0.0343671226958  
CGTCGCCA -0.102513104902  
CGTCGCCC -0.121705855919  
CGTCGCGA -0.0823258641654  
CGTCGCGC -0.0176850141968  
CGTCGCTA -0.00752956813563  
CGTCGCTC -0.253467353255  
CGTCGGAA 0.102415087264  
CGTCGGAC -0.237842937805  
CGTCGGAG -0.137588388537  
CGTCGGCA -0.112095727803  
CGTCGGCC -0.340873950969  
CGTCGGGA -0.188292069923  
CGTCGGGC -0.3555004694  
CGTCGGTA -0.0798081597083  
CGTCGGTC -0.321113233709  
CGTCGTAA 0.227763625614  
CGTCGTAC -0.237668046898  
CGTCGTAG -0.293092113424  
CGTCGTCA 0.0516156580513  
CGTCGTCC -0.202685977252  
CGTCGTGA -0.0474779150847  
CGTCGTGC -0.215095922999  
CGTCGTTA -0.132793782343  
CGTCGTTC -0.245795382159  
CGTCTAAA 0.156845470537  
CGTCTAAC -0.0582356558112  
CGTCTAAG -0.0657465540583  
CGTCTACA -0.00513879340168  
CGTCTACC -0.147368229018  
CGTCTAGA -0.00746625986292  
CGTCTAGC -0.166404002994  
CGTCTATA -0.109106451035  
CGTCTATC 0.0761684050714  
CGTCTCAA 0.0673758968782

CGTCTCAC -0.314973304778  
CGTCTCAG -0.0884746574113  
CGTCTCCA -0.288424329621  
CGTCTCCC -0.232979073114  
CGTCTCGA -0.216623444475  
CGTCTCGC -0.193078700426  
CGTCTCTA -0.2432189279  
CGTCTCTC -0.282609901054  
CGTCTGAA 0.0808442150902  
CGTCTGAC -0.240581010968  
CGTCTGAG -0.229363075893  
CGTCTGCA -0.0210465074599  
CGTCTGCC -0.309346225282  
CGTCTGGA -0.0922636032057  
CGTCTGGC -0.0515988231823  
CGTCTGTA -0.207413473177  
CGTCTGTC 0.0537866567399  
CGTCTTAA 0.0132640146909  
CGTCTTAC 0.13264454063  
CGTCTTAG -0.240659428499  
CGTCTTCA -0.0677172510484  
CGTCTTCC -0.237116162862  
CGTCTTGA -0.178765908358  
CGTCTTGC -0.0825980209697  
CGTCTTTA -0.0618092990192  
CGTCTTTC -0.240586308712  
CGTGAAAA 0.269816648605  
CGTGAAAC -0.195258822654  
CGTGAAAG 0.0177302686802  
CGTGAACA -0.057185284458  
CGTGAACC -0.268366207667  
CGTGAACG -0.0334894122773  
CGTGAAGA -0.242284524942  
CGTGAAGC -0.0946275375922  
CGTGAATA -0.0519777750203  
CGTGAATC 0.0920322912637  
CGTGACAA 0.0101829886937  
CGTGACAC -0.258402869091  
CGTGACAG -0.215884964856  
CGTGACCA -0.274151803065  
CGTGACCC -0.177081402494  
CGTGACGA -0.22955888556  
CGTGACGC -0.181566292315  
CGTGACTA 0.0519835332073  
CGTGACTC -0.146743548912  
CGTGAGAA 0.118315284982  
CGTGAGAC -0.272113547843  
CGTGAGAG -0.115694675346  
CGTGAGCA 0.213391677555  
CGTGAGCC -0.256175573199  
CGTGAGGA 0.0260715260715  
CGTGAGGC -0.151403038323  
CGTGAGTA 0.203077733381  
CGTGAGTC -0.104627468497

CGTGATAA 0.131399995036  
CGTGATAC 0.205388933089  
CGTGATAG -0.129109173633  
CGTGATCA 0.0937451909951  
CGTGATCC 0.337022607142  
CGTGATGA -0.154378578971  
CGTGATGC 0.0848324489245  
CGTGATTA 0.293242483741  
CGTGATTC 0.298605869944  
CGTGCAAA 0.0292902032451  
CGTGCAAC -0.159172620766  
CGTGCAAG -0.112398789636  
CGTGCACA 0.00826186287892  
CGTGCACC -0.19276588355  
CGTGCACG -0.0908846608621  
CGTGCAGA -0.00870800071693  
CGTGCAGC -0.145482293967  
CGTGCATA 0.178459595775  
CGTGCATC -0.20889321862  
CGTGCCAA -0.0999845289579  
CGTGCCAC -0.206142123905  
CGTGCCAG -0.238218166257  
CGTGCCCA -0.0245812135501  
CGTGCCCC -0.113046039082  
CGTGCCGA -0.114968353183  
CGTGCCGC -0.0495679871075  
CGTGCCTA -0.0899781486331  
CGTGCCTC -0.156277132793  
CGTGCGAA 0.0308697126879  
CGTGCGAC -0.093334899898  
CGTGCGAG -0.095777882545  
CGTGCGCA 0.161137347357  
CGTGCGCC -0.193078064994  
CGTGCGGA 0.0272546051598  
CGTGCGGC -0.169886559429  
CGTGCGTA 0.129295708853  
CGTGCGTC -0.137118915455  
CGTGCTAA -0.0446799561632  
CGTGCTAC -0.0313547878514  
CGTGCTAG -0.104616437776  
CGTGCTCA -0.0117143420217  
CGTGCTCC -0.0998437990409  
CGTGCTGA -0.208200320253  
CGTGCTGC -0.10545425088  
CGTGCTTA -0.052215972872  
CGTGCTTC -0.136407559376  
CGTGGA AA 0.0851214936899  
CGTGGAAC -0.210441931779  
CGTGGAAG -0.282520471173  
CGTGGA CA 0.10985963811  
CGTGGA CC -0.313859328532  
CGTGGA GA -0.0412538219605  
CGTGGA GC -0.181566545185  
CGTGGA TA 0.353492259294

CGTGGATC 0.329596432195  
CGTGGCAA 0.0473062633665  
CGTGGCAC -0.11155570086  
CGTGGCAG -0.193677300536  
CGTGGCCA -0.1121665058  
CGTGGCCC -0.267186717898  
CGTGGCGA 0.205438589064  
CGTGGCGC 0.0271549918327  
CGTGGCTA -0.117481393689  
CGTGGCTC -0.187635983172  
CGTGGGAA -0.0105298135601  
CGTGGGAC -0.203268460343  
CGTGGGAG -0.346764085766  
CGTGGGCA 0.0759596505186  
CGTGGGCC -0.33428574579  
CGTGGGGA -0.185405115077  
CGTGGGGC -0.125536275507  
CGTGGGTA 0.0851085245025  
CGTGGGTC -0.30024050705  
CGTGGTAA -0.00428665580181  
CGTGGTAC -0.0523703860499  
CGTGGTAG -0.0248819368919  
CGTGGTCA -0.14983978453  
CGTGGTCC -0.259230313305  
CGTGGTGA -0.1793201836  
CGTGGTGC -0.147993746743  
CGTGGTTA -0.112028589318  
CGTGGTTC -0.215506806407  
CGTGTAAG 0.154461624159  
CGTGTAAC -0.190416456869  
CGTGTAAG -0.239086712272  
CGTGTAACA 0.0784076087106  
CGTGTAACC -0.176672814541  
CGTGTAGA 0.00593017259684  
CGTGTAGC 0.193936629125  
CGTGTAATA 0.1086650371  
CGTGATATC 0.0731516640608  
CGTGTCAA 0.163125624986  
CGTGTCAC -0.164944110543  
CGTGTCAG 0.0872980418435  
CGTGTCCTA -0.106790171214  
CGTGTCCTC -0.211244142384  
CGTGTCGA -0.159317151167  
CGTGTCGC -0.150749536106  
CGTGTCCTA -0.138602790118  
CGTGTCCTC -0.115029387682  
CGTG TGAA 0.0613350285892  
CGTG TGAC -0.188955051069  
CGTG TGAG -0.257397214659  
CGTG TGCA 0.0375721699525  
CGTG TGCC -0.252089477963  
CGTG TGGA -0.180198811543  
CGTG TGGC -0.0994182304339  
CGTG TGTA 0.0105187832461

CGTGTGTC -0.120496492026  
CGTGTTAA -0.10249483588  
CGTGTTAC -0.0160600978276  
CGTGTTAG -0.0505298687117  
CGTGTTCA 0.0650609286973  
CGTGTTCC -0.0907501619997  
CGTGTTGA -0.157678907398  
CGTGTTGC 0.0122001059673  
CGTGTTTA -0.0104472164843  
CGTGTTTC 0.0520857207506  
CGTTAAAA 0.253266716787  
CGTTAAAC -0.100280549948  
CGTTAAAG 0.0126428913862  
CGTTAACA 0.0248566677422  
CGTTAACC -0.150631935859  
CGTTAACG -0.0424745808493  
CGTTAAGA 0.0216951453618  
CGTTAAGC -0.0726117108547  
CGTTAATA 0.0274668608002  
CGTTAATC 0.0407556316647  
CGTTACAA 0.091839773658  
CGTTACAC -0.157982880536  
CGTTACAG 0.0384006596128  
CGTTACCA -0.100870843295  
CGTTACCC 0.0169478040627  
CGTTACGA -0.065739362362  
CGTTACGC -0.0789763186845  
CGTTACTA -0.117370503647  
CGTTACTC -0.141301980375  
CGTTAGAA 0.133975898338  
CGTTAGAC -0.0513183037003  
CGTTAGAG -0.145195221277  
CGTTAGCA -0.163662015418  
CGTTAGCC 0.186271846005  
CGTTAGGA 0.130552039643  
CGTTAGGC -0.14920710228  
CGTTAGTA -0.0371123260075  
CGTTAGTC -0.160301569242  
CGTTATAA 0.169606245364  
CGTTATAC 0.112380976017  
CGTTATAG 0.23295767246  
CGTTATCA 0.0789480940996  
CGTTATCC 0.2532167407  
CGTTATGA 0.0521278854612  
CGTTATGC -0.179692186002  
CGTTATTA -0.000998243422486  
CGTTATTC 0.186728027853  
CGTTCAA 0.0311371978039  
CGTTCAAC -0.086185907401  
CGTTCAAG -0.199103834642  
CGTTCACA -0.0195714746532  
CGTTCACC -0.238383371015  
CGTTCAGA 0.0977839901316  
CGTTCAGC -0.000371524711138

CGTTCATA -0.169988988007  
CGTTCATC -0.19480359319  
CGTTCCAA -0.121378353093  
CGTTCCAC -0.113993587146  
CGTTCCAG -0.233471171208  
CGTTCCCA -0.172364838726  
CGTTCCCC -0.134507059729  
CGTTCCGA -0.163188773835  
CGTTCCGC -0.130972963285  
CGTTCCTA -0.140003094362  
CGTTCCTC -0.172032880343  
CGTTCGAA -0.13292277065  
CGTTCGAC -0.160451230995  
CGTTCGAG -0.193346565769  
CGTTCGCA 0.0598207252762  
CGTTCGCC -0.103636163145  
CGTTCGGA -0.00693162094974  
CGTTCGGC -0.209035619804  
CGTTCGTA 0.134551907279  
CGTTCGTC -0.0594709283569  
CGTTCTAA -0.0258191426465  
CGTTCTAC -0.099909491033  
CGTTCTAG 0.198803675832  
CGTTCTCA 0.00537114863316  
CGTTCTCC -0.0365371561207  
CGTTCTGA 0.0480273662092  
CGTTCTGC -0.0600945297915  
CGTTCTTA 0.0318379889491  
CGTTCTTC -0.240360192594  
CGTTGAAA 0.126396502266  
CGTTGAAC -0.0496214847725  
CGTTGAAG -0.100984941258  
CGTTGACA -0.0148982139077  
CGTTGACC -0.133452442989  
CGTTGAGA 0.0881871199901  
CGTTGAGC -0.0543079370594  
CGTTGATA 0.102222056768  
CGTTGATC 0.0160802385683  
CGTTGCAA -0.0439150967497  
CGTTGCAC -0.114640555316  
CGTTGCAG 0.10904420342  
CGTTGCCA -0.170663181606  
CGTTGCCC -0.285290947533  
CGTTGCGA 0.0960285354225  
CGTTGCGC 0.0201623322117  
CGTTGCTA -0.0563962360122  
CGTTGCTC -0.331660402868  
CGTTGGAA -0.215541516008  
CGTTGGAC -0.193115190544  
CGTTGGAG -0.200778013445  
CGTTGGCA -0.248459585308  
CGTTGGCC -0.239607713407  
CGTTGGGA -0.202413156959  
CGTTGGGC -0.133616531246

CGTTGGTA 0.0124037355965  
CGTTGGTC -0.137759066765  
CGTTGTAA 0.0971650255834  
CGTTGTAC 0.0910952274589  
CGTTGTAG 0.0656007532682  
CGTTGTCA 0.155255806771  
CGTTGTCC 0.0105229196138  
CGTTGTGA 0.0505806442195  
CGTTGTGC -0.198681735328  
CGTTGTTA 0.0681260931983  
CGTTGTTC -0.0222279804092  
CGTTTAAA 0.118595213244  
CGTTTAAC -0.172339382122  
CGTTTAAG 0.0713407735597  
CGTTTACA 0.123085625862  
CGTTTACC 0.123444742086  
CGTTTAGA 0.0844494632373  
CGTTTAGC -0.293350700906  
CGTTTATA 0.0648568678872  
CGTTTATC -0.0629644335255  
CGTTTCAA 0.0132074222983  
CGTTTCAC -0.266423751844  
CGTTTCAG 0.0425177243359  
CGTTTCCA 0.062993511091  
CGTTTCCC -0.0198090652636  
CGTTTCGA 0.0424405121375  
CGTTTCGC -0.101097969151  
CGTTTCTA 0.0130150434662  
CGTTTCTC -0.035567834281  
CGTTTGAA 0.0690371743684  
CGTTTGAC -0.128209476694  
CGTTTGAG 0.0672339005672  
CGTTTGCA -0.0225870966329  
CGTTTGCC 0.0319948047221  
CGTTTGGA 0.0203996190869  
CGTTTGGC -0.012056315193  
CGTTTGTA -0.0792398706598  
CGTTTGTC -0.15274600795  
CGTTTTAA -0.13820580053  
CGTTTTAC -0.118809633975  
CGTTTTAG -0.0427764355525  
CGTTTTC A 0.211477317538  
CGTTTTC C -0.0274470333586  
CGTTTTC G A 0.0261570110055  
CGTTTTC G C -0.0703616384718  
CGTTTTC T A 0.0613001175157  
CGTTTTC T C 0.114189470304  
CTAAAAAA 0.0890133792691  
CTAAAAAC 0.000619076376652  
CTAAAAAG -0.0301914534581  
CTAAAACA -0.0759223873848  
CTAAAACC -0.0547498959877  
CTAAAAGA 0.034248865817  
CTAAAAGC 0.027671656825



CTAAAATA 0.258133359803  
CTAAAATC 0.20079445837  
CTAAACAA -0.108526137871  
CTAAACAC 0.0896282601683  
CTAAACAG 0.0606607154588  
CTAAACCA -0.179825250695  
CTAAACCC -0.203880936914  
CTAAACGA -0.0154310109459  
CTAAACGC 0.054176766298  
CTAAACTA 0.217413487296  
CTAAACTC -0.0451448346224  
CTAAAGAA 0.119620008321  
CTAAAGAC -0.0716686658119  
CTAAAGAG -0.11958906289  
CTAAAGCA -0.200435378426  
CTAAAGCC -0.073898345164  
CTAAAGGA 0.0446077157103  
CTAAAGGC 0.032336744458  
CTAAAGTA 0.209855861371  
CTAAAGTC -0.197661210502  
CTAAATAA 0.0896031473763  
CTAAATAC 0.123378199136  
CTAAATAG -0.102892809193  
CTAAATCA 0.0258398894763  
CTAAATCC 0.222049882119  
CTAAATGA -0.0567324381176  
CTAAATGC -0.0240148025956  
CTAAATTA 0.207399108049  
CTAAATTC 0.182509142136  
CTAACAAA 0.154033853273  
CTAACAAC -0.0700141477823  
CTAACAAG -0.0579637672168  
CTAACACA -0.116957395598  
CTAACACC -0.0487967416772  
CTAACAGA 0.0961081144209  
CTAACAGC -0.175088436162  
CTAACATA 0.175850294372  
CTAACATC 0.0770012436679  
CTAACCAA -0.0163624154216  
CTAACCCAC -0.0462900115752  
CTAACCCAG -0.108826448331  
CTAACCCA -0.254318938829  
CTAACCCC -0.271561744348  
CTAACCGA 0.129657400308  
CTAACCGC -0.207127395759  
CTAACCTA -0.11025160666  
CTAACCTC -0.213761976692  
CTAACGAA 0.193802325497  
CTAACGAC -0.0175726690878  
CTAACGAG -0.0721963616087  
CTAACGCA -0.193825682649  
CTAACGCC -0.211381273346  
CTAACGGA 0.154299540886  
CTAACGGC -0.0636638127146

CTAACGTA 0.260708889586  
CTAACGTC -0.164219152492  
CTAACTAA 0.00445172733444  
CTAACTAC 0.0735538625704  
CTAACTAG 0.186993715466  
CTAACTCA -0.0389195857025  
CTAACTCC 0.163219053597  
CTAACTGA 0.070744298017  
CTAACTGC -0.0543188429775  
CTAACTTA 0.120140801959  
CTAACTTC 0.00496226253802  
CTAAGAAA -0.0232946445068  
CTAAGAAC 0.0688678350109  
CTAAGAAG -0.104597216364  
CTAAGACA -0.181201427352  
CTAAGACC 0.0179063360882  
CTAAGAGA 0.127940993993  
CTAAGAGC -0.131759541869  
CTAAGATA 0.290611884411  
CTAAGATC 0.141729884154  
CTAAGCAA -0.0417691583396  
CTAAGCAC -0.174068284021  
CTAAGCAG -0.192266133011  
CTAAGCCA -0.0555416082217  
CTAAGCCC -0.118920500736  
CTAAGCGA -0.0583323968001  
CTAAGCGC -0.175833795136  
CTAAGCTA 0.1486959327  
CTAAGCTC -0.132778051048  
CTAAGGAA 0.0829142427538  
CTAAGGAC -0.20956732691  
CTAAGGAG -0.283743076687  
CTAAGGCA -0.160568924724  
CTAAGGCC -0.0353401020416  
CTAAGGGA -0.0887592922085  
CTAAGGGC -0.123655223447  
CTAAGGTA 0.236422372786  
CTAAGGTC -0.153547257715  
CTAAGTAA 0.0714336099612  
CTAAGTAC -0.120535030062  
CTAAGTAG -0.0990205081114  
CTAAGTCA -0.126902006843  
CTAAGTCC 0.0303372918841  
CTAAGTGA -0.0898140517186  
CTAAGTGC -0.137267795136  
CTAAGTTA 0.130931206689  
CTAAGTTC 0.113424523551  
CTAATAAA -0.0159236784522  
CTAATAAC 0.147445676372  
CTAATAAG 0.01698867908  
CTAATACA 0.000465295183264  
CTAATACC -0.0859523590572  
CTAATAGA 0.205110107078  
CTAATAGC -0.143634930712

CTAATATA 0.219772113712  
CTAATATC 0.222521419491  
CTAATCAA 0.0630589266953  
CTAATCAC 0.0402007417518  
CTAATCAG -0.0509175805008  
CTAATCCA 0.00231162821252  
CTAATCCC 0.00490135252513  
CTAATCGA 0.145482215718  
CTAATCGC -0.0055220509766  
CTAATCTA 0.225024999453  
CTAATCTC 0.0948205513748  
CTAATGAA 0.0460041021  
CTAATGAC -0.193251560605  
CTAATGAG -0.0762577250503  
CTAATGCA -0.209091134655  
CTAATGCC -0.103371437664  
CTAATGGA -0.117577724159  
CTAATGGC -0.272892318636  
CTAATGTA 0.216312781472  
CTAATGTC -0.124702570508  
CTAATTAA 0.0654284942665  
CTAATTAC -0.0166074701285  
CTAATTAG -0.0704611415672  
CTAATTCA -0.114961982709  
CTAATTCC 0.088927770746  
CTAATTGA -0.0651636371067  
CTAATTGC 0.227187242339  
CTAATTTA 0.280182386243  
CTAATTTTC 0.135690787206  
CTACAAAA -0.0499704386035  
CTACAAAC -0.211082408401  
CTACAAAG -0.160078832198  
CTACAACA 0.100754727999  
CTACAACC -0.196092296241  
CTACAAGA 0.0846455917024  
CTACAAGC -0.0390490563394  
CTACAATA 0.137823989256  
CTACAATC 0.166833572987  
CTACACAA 0.0717993701088  
CTACACAC 0.128936592629  
CTACACAG -0.139145982041  
CTACACCA 0.0644956251017  
CTACACCC -0.0149770173833  
CTACACGA 0.223620650643  
CTACACGC -0.0952713500733  
CTACACTA 0.0927801079316  
CTACACTC -0.141401233496  
CTACAGAA -0.11621074632  
CTACAGAC 0.0788901849508  
CTACAGAG -0.154398811357  
CTACAGCA -0.00259875976431  
CTACAGCC -0.209984487481  
CTACAGGA 0.0396889119216  
CTACAGGC -0.227114816745

CTACAGTA 0.207559688474  
CTACAGTC -0.163211830972  
CTACATAA -0.142924812678  
CTACATAC 0.0218615650752  
CTACATAG -0.0496332965433  
CTACATCA 0.0117712750816  
CTACATCC 0.0997635088283  
CTACATGA 0.0981869010168  
CTACATGC -0.0426481170895  
CTACATTA 0.220499551105  
CTACATTC 0.0918454340416  
CTACCAA -0.108481034318  
CTACCAAC 0.174325379736  
CTACCAAG -0.150226697596  
CTACCACA 0.0405901769538  
CTACCACC -0.109435645024  
CTACCAGA -0.149625990168  
CTACCAGC -0.21785022177  
CTACCATA 0.23255184193  
CTACCATC 0.0334094425004  
CTACCCAA -0.114936112145  
CTACCCAC -0.00756817423484  
CTACCCAG -0.154031009223  
CTACCCCA -0.299023839647  
CTACCCCC -0.218702785994  
CTACCCGA 0.162188359158  
CTACCCGC -0.19819138115  
CTACCCTA -0.0865989148222  
CTACCCTC -0.229675116128  
CTACCGAA -0.0364096879248  
CTACCGAC -0.0258519654791  
CTACCGAG 0.00425155297485  
CTACCGCA -0.0904847376968  
CTACCGCC -0.0538875517288  
CTACCGGA 0.066092263062  
CTACCGGC -0.0460733465781  
CTACCGTA 0.162956285629  
CTACCGTC -0.239028794332  
CTACCTAA -0.0182341118378  
CTACCTAC 0.0487994881934  
CTACCTAG -0.0648752217105  
CTACCTCA -0.208192635419  
CTACCTCC -0.158374802386  
CTACCTGA 0.130229994964  
CTACCTGC -0.227036421422  
CTACCTTA 0.158951038539  
CTACCTTC -0.178505765186  
CTACGAAA 0.203524740334  
CTACGAAC -0.0284600079702  
CTACGAAG -0.164908199975  
CTACGACA -0.163303088702  
CTACGACC -0.206258837538  
CTACGAGA 0.0822544031883  
CTACGAGC -0.205629605279

CTACGATA 0.104477755993  
CTACGATC 0.176091764414  
CTACGCAA 0.0804646613578  
CTACGCAC -0.072189063223  
CTACGCAG -0.237656253421  
CTACGCCA -0.0465446835028  
CTACGCCC -0.0943342901181  
CTACGCGA 0.192181923024  
CTACGCGC -0.095596811323  
CTACGCTA -0.0277619232752  
CTACGCTC -0.022311542678  
CTACGGAA 0.0372714312108  
CTACGGAC -0.102506514456  
CTACGGAG -0.231975219804  
CTACGGCA -0.132985608175  
CTACGGCC -0.23377117129  
CTACGGGA -0.251293983397  
CTACGGGC -0.158050848626  
CTACGGTA 0.197437282395  
CTACGGTC -0.216598386614  
CTACGTAA -0.0459959798496  
CTACGTAC -0.111714990832  
CTACGTAG -0.294734216843  
CTACGTCA 0.0330694723608  
CTACGTCC 0.0345400496916  
CTACGTGA 0.0277481338087  
CTACGTGC -0.159024176406  
CTACGTTA 0.0671622035258  
CTACGTTC -0.248868497601  
CTACTAAA 0.0287022911907  
CTACTAAC 0.122946497258  
CTACTAAG 0.0712963598224  
CTACTACA 0.109915111348  
CTACTACC -0.135498261606  
CTACTAGA 0.0969109605473  
CTACTAGC 0.0259171016747  
CTACTATA 0.233582476296  
CTACTATC 0.11724258694  
CTACTCAA -0.218697046345  
CTACTCAC 0.0370232768626  
CTACTCAG -0.233920172549  
CTACTCCA -0.119551857681  
CTACTCCC -0.2008593666  
CTACTCGA 0.065043101246  
CTACTCGC -0.115396915985  
CTACTCTA 0.0376643861492  
CTACTCTC -0.149065481255  
CTACTGAA -0.148132522645  
CTACTGAC -0.0868723207763  
CTACTGAG -0.181446933549  
CTACTGCA -0.0786835973584  
CTACTGCC -0.121650620789  
CTACTGGA -0.203488957545  
CTACTGGC -0.139932201077

CTACTGTA 0.14910549404  
CTACTGTC -0.0808204899114  
CTACTTAA -0.0556141106399  
CTACTTAC 0.124974837096  
CTACTTCA -0.145870705296  
CTACTTCC -0.0500285381046  
CTACTTGA -0.0421087901307  
CTACTTGC 0.185323679044  
CTACTTTA 0.256630146785  
CTACTTTC -0.279795724269  
CTAGAAAA -0.0852134624789  
CTAGAAAC 0.0105129084765  
CTAGAAAG -0.0972880561415  
CTAGAACA 0.00040802026233  
CTAGAACC -0.0951559669454  
CTAGAAGA 0.0945008369251  
CTAGAAGC -0.063201613739  
CTAGAATA 0.171773610797  
CTAGAATC 0.339428960641  
CTAGACAA 0.0318155621186  
CTAGACAC -0.00247950774801  
CTAGACAG -0.0255479182003  
CTAGACCA -0.318119543614  
CTAGACCC -0.203974338828  
CTAGACGA 0.0305197146481  
CTAGACGC -0.234850803261  
CTAGACTA -0.177342745332  
CTAGACTC -0.174842236723  
CTAGAGAA 0.122305621342  
CTAGAGAC -0.159070178127  
CTAGAGAG -0.12783112633  
CTAGAGCA -0.205895486776  
CTAGAGCC -0.34155049303  
CTAGAGGA 0.110831879594  
CTAGAGGC -0.317541161063  
CTAGAGTA -0.000669328408867  
CTAGAGTC -0.23773786191  
CTAGATAA 0.100887388766  
CTAGATAC 0.277654503916  
CTAGATAG -0.0192588181124  
CTAGATCA -0.166316488958  
CTAGATCC 0.25096603724  
CTAGATGA -0.290567863256  
CTAGATGC 0.0770067588249  
CTAGATTA 0.405330540207  
CTAGATTC 0.443538579902  
CTAGCAAA 0.00560753591057  
CTAGCAAC -0.131300931082  
CTAGCAAG -0.245570579884  
CTAGCACA -0.062381845653  
CTAGCACC -0.226001468144  
CTAGCAGA 0.0362466515332  
CTAGCAGC -0.231316359815  
CTAGCATA -0.0507413013927

CTAGCATC 0.0709451617848  
CTAGCCAA -0.0326811983841  
CTAGCCAC -0.00946814583178  
CTAGCCAG -0.215965899223  
CTAGCCCA -0.2626841929  
CTAGCCCC -0.130646258992  
CTAGCCGA -0.0686113937349  
CTAGCCGC -0.381840797835  
CTAGCCCTA -0.101901573016  
CTAGCCCTC -0.268279922185  
CTAGCGAA 0.019803945899  
CTAGCGAC -0.15963417828  
CTAGCGAG -0.0323310032951  
CTAGCGCA -0.179221990203  
CTAGCGCC -0.179060285008  
CTAGCGGA 0.254660997085  
CTAGCGGC -0.0575324449738  
CTAGCGTA -0.00432483256267  
CTAGCGTC -0.299122758056  
CTAGCTAA -0.239515395808  
CTAGCTAC -0.0106664803032  
CTAGCTAG -0.234872723365  
CTAGCTCA -0.273816317248  
CTAGCTCC -0.0268023812084  
CTAGCTGA 0.084501166282  
CTAGCTGC -0.304977239463  
CTAGCTTA 0.0649303918406  
CTAGCTTC -0.204249217365  
CTAGGAAA 0.0263665759144  
CTAGGAAC -0.0935181279003  
CTAGGAAG -0.147564059084  
CTAGGACA -0.0212323817727  
CTAGGACC -0.280971098165  
CTAGGAGA 0.198812434764  
CTAGGAGC -0.0972619376046  
CTAGGATA 0.164556250593  
CTAGGATC 0.218733166427  
CTAGGCAA -0.00282388559067  
CTAGGCAC -0.0977420175156  
CTAGGCAG -0.133684561668  
CTAGGCCA -0.222596778511  
CTAGGCCC -0.211626501892  
CTAGGCCGA 0.181938136484  
CTAGGCCGC -0.197952483621  
CTAGGCTA -0.197264242504  
CTAGGCTC -0.227741057968  
CTAGGGAA 0.0179171259024  
CTAGGGAC -0.207141448919  
CTAGGGAG -0.286464320666  
CTAGGGCA -0.204303698375  
CTAGGGCC -0.185436981532  
CTAGGGGA 0.0241457180435  
CTAGGGGC -0.162184665455  
CTAGGGTA 0.218608415578

CTAGGGTC -0.343432464386  
CTAGGTAA -0.0461820979229  
CTAGGTAC -0.043525324263  
CTAGGTCA -0.334819910849  
CTAGGTCC -0.0762470741007  
CTAGGTGA -0.0801603601315  
CTAGGTGC -0.264884422942  
CTAGGTTA -0.195460897897  
CTAGGTTC -0.04786938225  
CTAGTAAA -0.0425603818894  
CTAGTAAC 0.0692152726583  
CTAGTAAG -0.0656461301155  
CTAGTACA -0.084997730202  
CTAGTACC -0.00991396422103  
CTAGTAGA 0.153651326401  
CTAGTAGC -0.0104415710476  
CTAGTATA 0.167255006576  
CTAGTATC 0.0492710341195  
CTAGTCAA -0.100475294468  
CTAGTCAC 0.0145121005943  
CTAGTCAG -0.245370458204  
CTAGTCCA -0.24823669513  
CTAGTCCC -0.0812061866654  
CTAGTCGA 0.104469589003  
CTAGTCGC -0.224564898531  
CTAGTCTA 0.0335822692975  
CTAGTCTC -0.212434518484  
CTAGTGAA -0.201632048705  
CTAGTGAC -0.244018822206  
CTAGTGAG -0.0749885791599  
CTAGTGCA 0.0551281308857  
CTAGTGCC -0.355501417654  
CTAGTGGA 0.194950811792  
CTAGTGGC -0.00248996980601  
CTAGTGTA 0.15428786231  
CTAGTGTC -0.281898319432  
CTAGTTAA 0.00777775020199  
CTAGTTAC 0.161686240447  
CTAGTTCA -0.0680619321394  
CTAGTTCC -0.0732254038233  
CTAGTTGA -0.0433331954613  
CTAGTTGC 0.117548678155  
CTAGTTTA -0.0111491905762  
CTAGTTTC -0.21563202856  
CTATAAAA 0.119774749458  
CTATAAAC 0.014632526295  
CTATAAAG -0.186055590826  
CTATAACA 0.0978000619149  
CTATAACC -0.0710669347033  
CTATAAGA 0.170240797647  
CTATAAGC 0.113649336146  
CTATAATA 0.20187514142  
CTATAATC 0.111753441085  
CTATACAA 0.0820944911854



CTATACAC 0.110028977468  
CTATACAG -0.187173824943  
CTATACCA -0.00777521361159  
CTATACCC -0.255048523022  
CTATACGA 0.198791997256  
CTATACGC 0.143423037362  
CTATACTA -0.0782267541587  
CTATACTC 0.0192228950046  
CTATAGAA -0.0350627358525  
CTATAGAC -0.270868333438  
CTATAGAG -0.21153934077  
CTATAGCA -0.0934621385836  
CTATAGCC -0.183684164827  
CTATAGGA 0.161303767071  
CTATAGGC -0.0412920770184  
CTATAGTA 0.159850900488  
CTATAGTC -0.28430788823  
CTATATAA 0.0819105640618  
CTATATAC 0.157853445732  
CTATATAG 0.0541760722348  
CTATATCA 0.205101348146  
CTATATCC 0.262314812517  
CTATATGA -0.0835532502199  
CTATATGC 0.148579958103  
CTATATTA 0.252686051084  
CTATATTC -0.00831003700649  
CTATCAAA 0.146884383453  
CTATCAAC 0.00769215048851  
CTATCAAG -0.27446878299  
CTATCACA 0.0258819149946  
CTATCACC -0.0374311397305  
CTATCAGA 0.0152368926228  
CTATCAGC -0.0385264411743  
CTATCATA 0.128565797829  
CTATCATC 0.0165957135523  
CTATCCAA 0.123496954394  
CTATCCAC 0.079615044926  
CTATCCAG 0.0644515038454  
CTATCCCA -0.178992055372  
CTATCCCC 0.156207528302  
CTATCCGA 0.154746246433  
CTATCCGC -0.0323825025729  
CTATCCTA 0.0384305453165  
CTATCCTC 0.0209769129143  
CTATCGAA 0.191329386948  
CTATCGAC -0.0351328073108  
CTATCGAG 0.0133712400458  
CTATCGCA -0.0840971094013  
CTATCGCC -0.0749728108144  
CTATCGGA 0.201495587688  
CTATCGGC 0.161493543937  
CTATCGTA 0.134263365594  
CTATCGTC -0.213733566675  
CTATCTAA 0.000848886520733

CTATCTAC 0.00525170981657  
CTATCTCA -0.0589133084677  
CTATCTCC 0.0786515623745  
CTATCTGA 0.0506404969234  
CTATCTGC -0.0216679764514  
CTATCTTA 0.153861594272  
CTATCTTC -0.0620455617043  
CTATGAAA 0.154693692839  
CTATGAAC -0.179397889664  
CTATGAAG -0.110285462239  
CTATGACA -0.0198417375983  
CTATGACC -0.0919470688948  
CTATGAGA 0.0281183623716  
CTATGAGC -0.174807451204  
CTATGATA 0.199186149208  
CTATGATC 0.003913003913  
CTATGCAA 0.15534956444  
CTATGCAC -0.0853870399325  
CTATGCAG -0.111921436316  
CTATGCCA -0.162764850376  
CTATGCCC 0.0984386590447  
CTATGCGA 0.0950920782757  
CTATGCGC -0.0817224579601  
CTATGCTA 0.0219464780577  
CTATGCTC -0.145573285025  
CTATGGAA 0.146451537558  
CTATGGAC -0.116284517827  
CTATGGAG -0.27813476016  
CTATGGCA -0.205123433817  
CTATGGCC -0.157347901486  
CTATGGGA -0.0337590611929  
CTATGGGC 0.0141406223771  
CTATGGTA 0.25520975521  
CTATGGTC -0.366661900753  
CTATGTAA 0.075658302931  
CTATGTAC 0.0835742342877  
CTATGTCA -0.136174011032  
CTATGTCC 0.00277439180164  
CTATGTGA 0.0532506587447  
CTATGTGC -0.0422888549886  
CTATGTTA 0.100716418898  
CTATGTTC -0.232723406677  
CTATTTAA 0.167703626928  
CTATTTAAC 0.0417649054013  
CTATTTAAG -0.0456806668928  
CTATTTACA 0.0638075108846  
CTATTTACC -0.0671700619694  
CTATTTAGA 0.117079917958  
CTATTTAGC 0.0175813668314  
CTATTTATA 0.109094691357  
CTATTTATC 0.046526718393  
CTATTTCAA -0.0315007700561  
CTATTTCAC 0.0982621740197  
CTATTTCAG -0.123265605146

CTATTCCA -0.111229675217  
CTATTCCC 0.121066704717  
CTATTCGA -0.0283578254986  
CTATTCGC 0.136873788389  
CTATTCTA 0.14398558338  
CTATTCTC -0.0461354092515  
CTATTGAA 0.0647793878481  
CTATTGAC -0.15425506298  
CTATTGAG 0.0506813719408  
CTATTGCA -0.106329452052  
CTATTGCC -0.0338256093485  
CTATTGGA 0.0624913323066  
CTATTGGC 0.0354738951339  
CTATTGTA 0.221098965184  
CTATTGTC -0.097652253985  
CTATTTAA -0.0772439105772  
CTATTTAC 0.191285592286  
CTATTTCA 0.0474084509098  
CTATTTCC 0.0605337109406  
CTATTTGA -0.0823149549639  
CTATTTGC 0.171902075137  
CTATTTTA -0.0157774854745  
CTATTTTC 0.0674398838623  
CTCAAAAA 0.089393801515  
CTCAAAAC 0.0909073361735  
CTCAAAAAG -0.262549715146  
CTCAAACA -0.114375192495  
CTCAAACC -0.184868586112  
CTCAAAGA -0.0658113507209  
CTCAAAGC 0.141803249779  
CTCAAATA 0.150479680783  
CTCAAATC 0.15644839894  
CTCAACAA -0.00725788441974  
CTCAACAC -0.0961638669016  
CTCAACAG -0.0250607985706  
CTCAACCA -0.132819580309  
CTCAACCC 0.0769961241725  
CTCAACGA -0.0100739216416  
CTCAACGC 0.0938860578763  
CTCAACTA 0.0630478963812  
CTCAACTC -0.249819427684  
CTCAAGAA -0.0252938889303  
CTCAAGAC -0.188916749738  
CTCAAGAG -0.304689416428  
CTCAAGCA -0.12322490468  
CTCAAGCC -0.207680139854  
CTCAAGGA 0.00422323149596  
CTCAAGGC -0.051148198045  
CTCAAGTA -0.0469684560594  
CTCAAGTC -0.215528864845  
CTCAATAA 0.184742669869  
CTCAATAC 0.0291986306869  
CTCAATCA -0.0937493967797  
CTCAATCC -0.0517544077363

CTCAATGA 0.00459964096328  
CTCAATGC -0.263693341107  
CTCAATTA 0.055463748969  
CTCAATTC 0.0752939716649  
CTCACAAA -0.0399001806124  
CTCACAAAC -0.065038104872  
CTCACAAAG -0.159499651867  
CTCACACA -0.195268025748  
CTCACACC 0.0238047965321  
CTCACAGA -0.0164046797846  
CTCACAGC 0.00879536575211  
CTCACATA 0.157517021153  
CTCACATC -0.172248553176  
CTCACCAA 0.137303970637  
CTCACCCAC -0.0605182115691  
CTCACCCAG 0.0103328643998  
CTCACCCA -0.200080313066  
CTCACCCC -0.043429044364  
CTCACCGA 0.0471106472121  
CTCACCGC -0.193018856221  
CTCACCTA 0.0438709702702  
CTCACCTC -0.216336836998  
CTCACGAA 0.147377404953  
CTCACGAC -0.143243578608  
CTCACGAG -0.206098169419  
CTCACGCA -0.0338377254766  
CTCACGCC -0.237053409202  
CTCACGGA 0.172217672218  
CTCACGGC 0.005468951856  
CTCACGTA -0.103308631956  
CTCACGTC -0.156778177508  
CTCACTAA 0.0208707329919  
CTCACTAC -0.15275071696  
CTCACTCA -0.155211366273  
CTCACTCC -0.0398761901843  
CTCACTGA 0.138942212944  
CTCACTGC -0.19425354846  
CTCACTTA 0.0583409863735  
CTCACTTC 0.0729779366143  
CTCAGAAA 0.149019174976  
CTCAGAAC -0.191753436615  
CTCAGAAG -0.177184190287  
CTCAGACA -0.0861261384222  
CTCAGACC -0.19392784888  
CTCAGAGA 0.0841726093589  
CTCAGAGC -0.157793514732  
CTCAGATA 0.287307861622  
CTCAGATC 0.233389779786  
CTCAGCAA -0.0178079072626  
CTCAGCAC -0.363414271187  
CTCAGCAG -0.253728820917  
CTCAGCCA -0.301356949716  
CTCAGCCC -0.285873744264  
CTCAGCGA 0.00314372677971

CTCAGCGC -0.0834363519866  
CTCAGCTA -0.0177712147409  
CTCAGCTC -0.187138347875  
CTCAGGAA -0.115229145815  
CTCAGGAC -0.297122957243  
CTCAGGAG -0.241926632953  
CTCAGGCA -0.321766032257  
CTCAGGCC -0.169573523209  
CTCAGGGA -0.25566509078  
CTCAGGGC -0.198708395792  
CTCAGGTA -0.0479170630686  
CTCAGGTC -0.145215617197  
CTCAGTAA -0.111908907671  
CTCAGTAC -0.0471588213397  
CTCAGTCA -0.153244475897  
CTCAGTCC -0.15846946243  
CTCAGTGA 0.181005525426  
CTCAGTGC -0.100732100757  
CTCAGTTA 0.0326379714313  
CTCAGTTC -0.364056761926  
CTCATAAA 0.121715179961  
CTCATAAC 0.020384225163  
CTCATAAG -0.0491422207236  
CTCATACA -0.224045888979  
CTCATACC -0.138091902187  
CTCATAGA -0.0761456625806  
CTCATAGC -0.123298759881  
CTCATATA 0.074833786955  
CTCATATC 0.200774435596  
CTCATCAA 0.120604511502  
CTCATCAC -0.200703243911  
CTCATCAG -0.00605607176485  
CTCATCCA -0.193269318248  
CTCATCCC -0.267315699385  
CTCATCGA 0.189098778859  
CTCATCGC -0.200367439309  
CTCATCTA 0.115481582017  
CTCATCTC -0.297715231257  
CTCATGAA 0.0575191784122  
CTCATGAC -0.0967227806042  
CTCATGAG -0.127569005195  
CTCATGCA -0.081626029639  
CTCATGCC -0.112732327765  
CTCATGGA 0.0268366386138  
CTCATGGC -0.101219766761  
CTCATGTA 0.126040305687  
CTCATGTC -0.116926743899  
CTCATTAA 0.00931986252078  
CTCATTAC 0.14345700816  
CTCATTCA -0.168397738581  
CTCATTCC -0.22169200658  
CTCATTGA 0.122570228631  
CTCATTGC -0.126732819235  
CTCATTTA 0.00621227272395

CTCATTTTC -0.199789373275  
CTCCAAAA -0.0514605514606  
CTCCAAAC -0.066374145665  
CTCCAAAG -0.191432709724  
CTCCAACA 0.0721512180998  
CTCCAACC -0.283000993689  
CTCCAAGA -0.0466391246907  
CTCCAAGC -0.115861143832  
CTCCAATA 0.146224737134  
CTCCAATC -0.101853266925  
CTCCACAA -0.0199422068916  
CTCCACAC -0.153234411057  
CTCCACAG -0.0772149127608  
CTCCACCA -0.305164658318  
CTCCACCC -0.215470032993  
CTCCACGA 0.0758076722662  
CTCCACGC -0.0100472252432  
CTCCACTA 0.0274718527972  
CTCCACTC -0.280380889385  
CTCCAGAA -0.129669689658  
CTCCAGAC -0.1500025465  
CTCCAGAG -0.0641006219989  
CTCCAGCA -0.201722604399  
CTCCAGCC -0.304526697925  
CTCCAGGA 0.111170558309  
CTCCAGGC -0.209648520733  
CTCCAGTA 0.0597293489924  
CTCCAGTC -0.237910150704  
CTCCATAA -0.0151653613425  
CTCCATAC -0.124995347279  
CTCCATCA -0.138778896915  
CTCCATCC -0.199643162066  
CTCCATGA -0.00480976844613  
CTCCATGC -0.15634575045  
CTCCATTA 0.0496624161515  
CTCCATTC -0.224907264968  
CTCCCAA -0.0629151251122  
CTCCCAAC -0.216353037506  
CTCCCAAG 0.00164294816867  
CTCCCACA -0.245832609828  
CTCCCACC -0.131509738246  
CTCCCAGA -0.152218270133  
CTCCCAGC -0.129908621831  
CTCCCATA 0.0517897192538  
CTCCCATC -0.244637845711  
CTCCCCAA -0.132867026806  
CTCCCCAC -0.234521371999  
CTCCCCAG -0.196131709588  
CTCCCCCA -0.102357085631  
CTCCCCCC -0.212653238716  
CTCCCCGA -0.209916667356  
CTCCCCGC -0.0136493885839  
CTCCCCTA -0.174121207611  
CTCCCCTC -0.274910083096

CTCCCGAA -0.0639083958521  
CTCCCGAC -0.196833626899  
CTCCCGAG -0.170537346269  
CTCCCGCA -0.123486045287  
CTCCCGCC -0.251934458586  
CTCCCGGA 0.104233710294  
CTCCCGGC -0.195494027781  
CTCCCGTA -0.0592613731929  
CTCCCGTC -0.337385692252  
CTCCCTAA -0.109929550337  
CTCCCTAC -0.220992941673  
CTCCCTCA -0.152633406931  
CTCCCTCC -0.295319171222  
CTCCCTGA -0.11250203331  
CTCCCTGC -0.22223819203  
CTCCCTTA -0.129073007264  
CTCCCTTC -0.21531825761  
CTCCGAAA -0.0651017075068  
CTCCGAAC -0.305364850785  
CTCCGAAG -0.188360357415  
CTCCGACA -0.222525480596  
CTCCGACC -0.27313312801  
CTCCGAGA 0.100112509203  
CTCCGAGC -0.0850395003516  
CTCCGATA 0.028404775497  
CTCCGATC 0.0132894900112  
CTCCGCAA -0.0172514470486  
CTCCGCAC -0.264075458261  
CTCCGCAG -0.18608334902  
CTCCGCCA -0.158267266124  
CTCCGCCC -0.196915238048  
CTCCGCGA 0.0192327313539  
CTCCGCGC -0.151297793627  
CTCCGCTA 0.0195208257409  
CTCCGCTC -0.216371004425  
CTCCGGAA -0.230032296244  
CTCCGGAC -0.272368983147  
CTCCGGAG -0.392076875387  
CTCCGGCA -0.00346291217413  
CTCCGGCC -0.188543033119  
CTCCGGGA -0.0843481738709  
CTCCGGGC -0.156115700885  
CTCCGGTA -0.175980353106  
CTCCGGTC -0.160623156703  
CTCCGTAA 0.139970549061  
CTCCGTAC 0.0261680413196  
CTCCGTCA -0.189604925405  
CTCCGTCC -0.186231210346  
CTCCGTGA 0.00067698552547  
CTCCGTGC 0.0411527229709  
CTCCGTTA -0.12124717384  
CTCCGTTC -0.199512697171  
CTCCTAAA -0.186980842341  
CTCCTAAC -0.0415858562508

CTCCTAAG -0.21134519467  
CTCCTACA -0.169028164287  
CTCCTACC -0.23461185402  
CTCCTAGA -0.014555907969  
CTCCTAGC 0.016465501314  
CTCCTATA -0.0184528805939  
CTCCTATC -0.235478638946  
CTCCTCAA -0.0541549081497  
CTCCTCAC -0.211606070468  
CTCCTCAG -0.0918049557879  
CTCCTCCA -0.240838136507  
CTCCTCCC -0.182813300502  
CTCCTCGA -0.0289419341676  
CTCCTCGC -0.180642057407  
CTCCTCTA -0.0100267877346  
CTCCTCTC -0.268201752572  
CTCCTGAA -0.0324834607924  
CTCCTGAC -0.145935039442  
CTCCTGCA 0.0186577935097  
CTCCTGCC -0.345185626201  
CTCCTGGA -0.114296369929  
CTCCTGGC -0.0532882532464  
CTCCTGTA -0.0640049105976  
CTCCTGTC -0.104133190306  
CTCCTTAA -0.18412034706  
CTCCTTAC -0.102020753536  
CTCCTTCA -0.110930380466  
CTCCTTCC -0.133040643383  
CTCCTTGA 0.0371177828155  
CTCCTTGC -0.11707562358  
CTCCTTTA -0.184294116187  
CTCCTTTC -0.279190686108  
CTCGAAAA -0.0358977540638  
CTCGAAAC -0.124760041751  
CTCGAAAG -0.243524975667  
CTCGAACA -0.244571556195  
CTCGAACC -0.242559317508  
CTCGAAGA -0.0662952341338  
CTCGAAGC -0.067453355784  
CTCGAATA 0.113970496996  
CTCGAATC 0.183551455078  
CTCGACAA -0.250271770455  
CTCGACAC -0.191646734856  
CTCGACAG -0.064426847475  
CTCGACCA -0.152856004654  
CTCGACCC -0.211746205011  
CTCGACGA -0.140394842402  
CTCGACGC -0.107259353313  
CTCGACTA -0.0410093288881  
CTCGACTC -0.121068841029  
CTCGAGAA -0.00936402852492  
CTCGAGAC -0.142542019413  
CTCGAGAG -0.274641554833  
CTCGAGCA -0.11073544372



CTCGAGCC -0.406746376272  
CTCGAGGA -0.105658595539  
CTCGAGGC -0.00949249286512  
CTCGAGTA -0.0104994801964  
CTCGAGTC -0.0473352140019  
CTCGATAA -0.0780546386607  
CTCGATAC 0.0341760493276  
CTCGATCA -0.0662318397013  
CTCGATCC 0.0605633181391  
CTCGATGA -0.0672930330524  
CTCGATGC -0.242163616466  
CTCGATTA 0.149908802144  
CTCGATTC 0.297023422845  
CTCGCAA -0.0562021756215  
CTCGCAAC -0.237859929151  
CTCGCAAG -0.111298823179  
CTCGCACA -0.0436318912725  
CTCGCACC -0.0943372957668  
CTCGCAGA -0.109652470769  
CTCGCAGC -0.149951885031  
CTCGCATA 0.056548283821  
CTCGCATC -0.119263764484  
CTCGCCAA -0.287981652581  
CTCGCCAC -0.156739582903  
CTCGCCAG 0.100569330599  
CTCGCCCA -0.14505060677  
CTCGCCC -0.268600600916  
CTCGCCGA 0.00393211178668  
CTCGCCGC -0.156485998602  
CTCGCCTA -0.223804026604  
CTCGCCTC -0.219311519602  
CTCGCGAA 0.0438556220066  
CTCGCGAC -0.296270866381  
CTCGCGAG -0.0128122441892  
CTCGCGCA -0.103749432579  
CTCGCGCC -0.289689114503  
CTCGCGGA -0.00522105355357  
CTCGCGGC -0.215936495833  
CTCGCGTA -0.0515120106859  
CTCGCGTC 0.0112247233459  
CTCGCTAA 0.168255439662  
CTCGCTAC -0.173154130285  
CTCGCTCA -0.0245062767186  
CTCGCTCC -0.30414582783  
CTCGCTGA -0.0817115902593  
CTCGCTGC -0.151033094874  
CTCGCTTA 0.0520230974776  
CTCGCTTC -0.0964230295935  
CTCGGAA 0.154965389946  
CTCGGAAC -0.272923693009  
CTCGGAAG 0.0360043238831  
CTCGGACA -0.250055080943  
CTCGGACC -0.239311044404  
CTCGGAGA -0.0111026765837

CTCGGAGC -0.17472726344  
CTCGGATA 0.271456099501  
CTCGGATC 0.24491361503  
CTCGGCAA -0.126103955905  
CTCGGCAC -0.288041234105  
CTCGGCAG -0.075209333854  
CTCGGCCA 0.00186191060785  
CTCGGCCC -0.213379922535  
CTCGGCGA 0.0967503550206  
CTCGGCGC -0.111701145052  
CTCGGCTA -0.148039710306  
CTCGGCTC -0.248972520612  
CTCGGGAA 0.0148770379929  
CTCGGGAC -0.227433228035  
CTCGGGCA -0.291960370903  
CTCGGGCC -0.309535124493  
CTCGGGGA -0.209758303076  
CTCGGGGC -0.29640105647  
CTCGGGTA 0.00289407865165  
CTCGGGTC 0.123161536609  
CTCGGTAA -0.00251454347715  
CTCGGTAC -0.291811428513  
CTCGGTCA -0.246723635499  
CTCGGTCC -0.0310786247798  
CTCGGTGA -0.205431335086  
CTCGGTGC -0.280353584216  
CTCGGTTA -0.0455705349518  
CTCGGTTC -0.254281204257  
CTCGTAAA -0.0362862428217  
CTCGTAAC 0.0459638653585  
CTCGTAAG -0.0223760645586  
CTCGTACA -0.103151714002  
CTCGTACC -0.306221935548  
CTCGTAGA 0.0563911018456  
CTCGTAGC -0.0904569227378  
CTCGTATA 0.128797863961  
CTCGTATC 0.0728911045744  
CTCGTCAA -0.0104071022657  
CTCGTCAC -0.226805394844  
CTCGTCAG -0.1128162573  
CTCGTCCA -0.175057101367  
CTCGTCCC -0.108619569897  
CTCGTCGA -0.0449697758846  
CTCGTCGC -0.0897412564079  
CTCGTCTA 0.0801872951687  
CTCGTCTC -0.259745916674  
CTCGTGAA -0.151460991334  
CTCGTGAC -0.298620140175  
CTCGTGCA -0.158027208601  
CTCGTGCC -0.311357265127  
CTCGTGGA -0.0882513497695  
CTCGTGGC -0.0339916906443  
CTCGTGTA 0.208929001555  
CTCGTGTC 0.0915998643271

CTCGTTAA -0.0101051464688  
CTCGTTAC 0.0726692116231  
CTCGTTCA 0.0210444604384  
CTCGTTCC -0.0226686741838  
CTCGTTGA 0.018545007641  
CTCGTTGC -0.131111607401  
CTCGTTTA -0.0269548841996  
CTCGTTTC -0.125442464636  
CTCTAAAA -0.198937219342  
CTCTAAAC -0.0608839659645  
CTCTAAAG -0.255821709375  
CTCTAACA -0.0523117474655  
CTCTAACC -0.248975124543  
CTCTAAGA -0.196078188141  
CTCTAAGC -0.138765167117  
CTCTAATA 0.166884515369  
CTCTAATC -0.0286132420458  
CTCTACAA -0.142561761325  
CTCTACAC -0.219131184893  
CTCTACAG -0.0189891526008  
CTCTACCA -0.0780140670709  
CTCTACCC -0.133829549684  
CTCTACGA -0.0636801816332  
CTCTACGC -0.153545955573  
CTCTACTA 0.113135478785  
CTCTACTC -0.209765337436  
CTCTAGAA -0.0302904467412  
CTCTAGAC -0.286206021907  
CTCTAGAG -0.0998643944468  
CTCTAGCA -0.194191499392  
CTCTAGCC -0.104053461694  
CTCTAGGA 0.00174229761392  
CTCTAGGC -0.165091101572  
CTCTAGTA 0.185297402247  
CTCTAGTC -0.259599992412  
CTCTATAA -0.0131688161991  
CTCTATAC -0.0404490082192  
CTCTATCA -0.0865405248384  
CTCTATCC 0.044996787421  
CTCTATGA -0.179138237605  
CTCTATGC -0.0939770941004  
CTCTATTA 0.166154755735  
CTCTATTC -0.103256086187  
CTCTCAAA -0.190366674501  
CTCTCAAC -0.161224287239  
CTCTCAAG -0.293568484748  
CTCTCACA -0.304843415025  
CTCTCACC -0.116527105818  
CTCTCAGA -0.200304621704  
CTCTCAGC -0.0851907908703  
CTCTCATA -0.00394195848741  
CTCTCATC -0.105790139758  
CTCTCCAA 0.00179148697067  
CTCTCCAC -0.246058754942

CTCTCCAG 0.0218358854722  
CTCTCCCA -0.354174762633  
CTCTCCCC 0.0495694468571  
CTCTCCGA -0.0428674664417  
CTCTCCGC -0.19125970034  
CTCTCCTA -0.195069829393  
CTCTCCTC -0.255031694247  
CTCTCGAA -0.0410010261021  
CTCTCGAC -0.374914217206  
CTCTCGCA -0.180652381858  
CTCTCGCC -0.28328744243  
CTCTCGGA 0.102423304599  
CTCTCGGC 0.0788240030664  
CTCTCGTA 0.336428715217  
CTCTCGTC -0.168602979489  
CTCTCTAA -0.235928140411  
CTCTCTAC -0.0778205181233  
CTCTCTCA -0.208909122485  
CTCTCTCC -0.194422105492  
CTCTCTGA -0.123277825854  
CTCTCTGC -0.215762570865  
CTCTCTTA 0.032380408798  
CTCTCTTC -0.354711335731  
CTCTGAAA 0.056809704897  
CTCTGAAC -0.0707682297052  
CTCTGAAG -0.27717677482  
CTCTGACA -0.155553074843  
CTCTGACC -0.261212628826  
CTCTGAGA -0.0541019693482  
CTCTGAGC -0.00557168738987  
CTCTGATA 0.192476807077  
CTCTGATC 0.0775129011773  
CTCTGCAA 0.152375495427  
CTCTGCAC -0.1392090694  
CTCTGCAG -0.209094467461  
CTCTGCCA -0.160381259563  
CTCTGCCC -0.109009847953  
CTCTGCGA 0.0216841798377  
CTCTGCGC -0.216831958885  
CTCTGCTA 0.138848784333  
CTCTGCTC -0.0872646569856  
CTCTGGAA -0.167194690534  
CTCTGGAC -0.272406618723  
CTCTGGCA -0.207551726503  
CTCTGGCC -0.278232357683  
CTCTGGGA -0.179280836552  
CTCTGGGC -0.307076445569  
CTCTGGTA -0.0158657279869  
CTCTGGTC -0.0698646304707  
CTCTGTAA -0.0523557878295  
CTCTGTAC -0.137864172778  
CTCTGTCA -0.132524784047  
CTCTGTCC -0.146870391046  
CTCTGTGA 0.0158010594863

CTCTGTGC -0.248173483667  
CTCTGTTA -0.0581513480848  
CTCTGTTC -0.172809533192  
CTCTTAAA 0.049990762112  
CTCTTAAC -0.0184081722621  
CTCTTAAG -0.018284645802  
CTCTTACA -0.0594038086757  
CTCTTACC -0.109261732233  
CTCTTAGA -0.0268683211267  
CTCTTAGC -0.0296481054057  
CTCTTATA 0.0594300854726  
CTCTTATC -0.0358829904284  
CTCTTCAA -0.186420949543  
CTCTTCAC -0.303044083399  
CTCTTCAG -0.278313886031  
CTCTTCCA -0.217405812603  
CTCTTCCC -0.221338506037  
CTCTTCGA 0.12929002159  
CTCTTCGC -0.0322219221477  
CTCTTCTA 0.127301591936  
CTCTTCTC -0.187840665658  
CTCTTGAA -0.234905718893  
CTCTTGAC -0.0924312411976  
CTCTTGCA -0.038207111442  
CTCTTGCC -0.283082124716  
CTCTTGGA -0.125695649572  
CTCTTGGC -0.149468511321  
CTCTTGTA 0.207276482997  
CTCTTGTC 0.0129916863134  
CTCTTTAA -0.0467367538759  
CTCTTTAC 0.084847047145  
CTCTTTCA -0.0858820609768  
CTCTTTCC -0.284179604035  
CTCTTTGA -0.0689325689326  
CTCTTTGC -0.173244543712  
CTCTTTTA -0.0915309248643  
CTCTTTTC -0.0473379715804  
CTGAAAAA 0.197501514565  
CTGAAAAC 0.00120766163006  
CTGAAAAG 0.0463268564244  
CTGAAACA 0.050502183677  
CTGAAACC -0.136387179614  
CTGAAAGA -0.13616249626  
CTGAAAGC -0.240178200048  
CTGAAATA 0.161606510091  
CTGAAATC 0.409762559944  
CTGAACAA 5.27334541033E-5  
CTGAACAC 0.115173298464  
CTGAACAG -0.137182637183  
CTGAACCA -0.27412231733  
CTGAACCC -0.204731463793  
CTGAACGA 0.116458731419  
CTGAACGC -0.0840093190414  
CTGAACTA 0.0277426186517

CTGAACTC -0.302425432753  
CTGAAGAA 0.168509448698  
CTGAAGAC -0.0103450557996  
CTGAAGCA -0.322877097948  
CTGAAGCC -0.366814965503  
CTGAAGGA -0.195012676667  
CTGAAGGC -0.318270562262  
CTGAAGTA -0.0900847968539  
CTGAAGTC -0.355674066725  
CTGAATAA 0.00449623176896  
CTGAATAC 0.00630278169091  
CTGAATCA -0.105496959921  
CTGAATCC 0.166818974767  
CTGAATGA 0.0327724418634  
CTGAATGC -0.0627979760378  
CTGAATTA 0.170319628037  
CTGAATTC 0.0596855543309  
CTGACAAA 0.119357240352  
CTGACAAC 0.105775875244  
CTGACAAG -0.0381489584991  
CTGACACA -0.0958847616476  
CTGACACC 0.0812286115316  
CTGACAGA -0.0233754883391  
CTGACAGC -0.222445762823  
CTGACATA -0.0200480184629  
CTGACATC -0.123359992501  
CTGACCAA -0.0477496887238  
CTGACCAC -0.00507723498322  
CTGACCAG -0.0111001148766  
CTGACCCA -0.390101441008  
CTGACCCC -0.18024023577  
CTGACCGA -0.257083501771  
CTGACCGC -0.321139253416  
CTGACCTA -0.141102383797  
CTGACCTC -0.253505833807  
CTGACGAA 0.134457639614  
CTGACGAC -0.0870268519401  
CTGACGCA -0.224860308245  
CTGACGCC -0.227190566306  
CTGACGGA 0.0461308454676  
CTGACGGC -0.118237682885  
CTGACGTA -0.0167150621696  
CTGACGTC -0.193554767615  
CTGACTAA -0.121676297625  
CTGACTAC -0.266519702321  
CTGACTCA -0.27943475348  
CTGACTCC -0.186136840922  
CTGACTGA 0.111001218951  
CTGACTGC -0.0966820815306  
CTGACTTA 0.127940665558  
CTGACTTC -0.0529467226932  
CTGAGAAA 0.234105435588  
CTGAGAAC 0.0348288954513  
CTGAGAAG -0.0124480146676

CTGAGACA -0.17540928926  
CTGAGACC -0.157292556025  
CTGAGAGA -0.0111861172467  
CTGAGAGC -0.23593851401  
CTGAGATA 0.125917928948  
CTGAGATC 0.2707542253  
CTGAGCAA 0.0160623546637  
CTGAGCAC -0.263522312902  
CTGAGCAG 0.0339737854377  
CTGAGCCA -0.2951529797  
CTGAGCCC -0.236966310253  
CTGAGCGA -0.0201218116799  
CTGAGCGC -0.0944561606638  
CTGAGCTA 0.0279869783873  
CTGAGCTC -0.11990153018  
CTGAGGAA 0.195417180266  
CTGAGGAC -0.236961467794  
CTGAGGCA -0.240529410305  
CTGAGGCC -0.282025519528  
CTGAGGGA 0.0914123489881  
CTGAGGGC -0.175979917785  
CTGAGGTA -0.120726310129  
CTGAGGTC -0.484756911469  
CTGAGTAA -0.0353809770589  
CTGAGTAC -0.299653010345  
CTGAGTCA -0.279171249549  
CTGAGTCC -0.0864908933522  
CTGAGTGA -0.129327545514  
CTGAGTGC -0.170488721286  
CTGAGTTA 0.119640797409  
CTGAGTTC -0.233213098281  
CTGATAAA 0.125950011169  
CTGATAAC 0.164089107538  
CTGATAAG 0.136174390342  
CTGATACA 0.107875092724  
CTGATACC 0.118078436239  
CTGATAGA 0.0040302009999  
CTGATAGC -0.11518677299  
CTGATATA 0.243754516324  
CTGATATC 0.405943665467  
CTGATCAA -0.0721584100029  
CTGATCAC 0.0492158825492  
CTGATCAG -0.121621398156  
CTGATCCA -0.0706959161559  
CTGATCCC -0.093756978735  
CTGATCGA -0.140069123449  
CTGATCGC 0.266386220932  
CTGATCTA -0.0952481407027  
CTGATCTC 0.191776092494  
CTGATGAA 0.18857562797  
CTGATGAC -0.216624510509  
CTGATGCA -0.0878762135391  
CTGATGCC -0.143246552337  
CTGATGGA -0.151743697781

CTGATGGC -0.113916111869  
CTGATGTA 0.0155139753993  
CTGATGTC -0.183093058071  
CTGATTAA 0.135517059759  
CTGATTAC 0.398705238603  
CTGATTCA -0.110209476062  
CTGATTCC 0.435991087506  
CTGATTGA -0.0611438013923  
CTGATTGC 0.401016719199  
CTGATTTA 0.164816331483  
CTGATTTT 0.403043539407  
CTGCAAAA -0.0949510582339  
CTGCAAAC 0.0142120975453  
CTGCAAAG -0.111924962527  
CTGCAACA 0.0266697930451  
CTGCAACC -0.0728415389084  
CTGCAAGA -0.0867213715937  
CTGCAAGC -0.255120241945  
CTGCAATA 0.162524783737  
CTGCAATC 0.336742958137  
CTGCACAA -0.0956179747401  
CTGCACAC 0.0571714965654  
CTGCACAG 0.0468819356564  
CTGCACCA -0.104900233671  
CTGCACCC -0.148963513153  
CTGCACGA -0.0268330788252  
CTGCACGC -0.0494355539015  
CTGCACTA 0.0769552491551  
CTGCACTC -0.269150933254  
CTGCAGAA 0.117821678428  
CTGCAGAC 0.0375485678516  
CTGCAGCA -0.193414187409  
CTGCAGCC 0.0029027888977  
CTGCAGGA 0.10985749172  
CTGCAGGC -0.231515408872  
CTGCAGTA 0.101732808771  
CTGCAGTC -0.317238928911  
CTGCATAA -0.209195995324  
CTGCATAC -0.0111596096436  
CTGCATCA -0.173870074019  
CTGCATCC -0.17682012887  
CTGCATGA -0.145834194863  
CTGCATGC -0.0513998847332  
CTGCATTA 0.0475544331146  
CTGCATTC -0.0454303920352  
CTGCCAAA -0.176112283024  
CTGCCAAC -0.330915776967  
CTGCCAAG -0.138853740231  
CTGCCACA -0.191452524902  
CTGCCACC -0.162864080681  
CTGCCAGA -0.103063418365  
CTGCCAGC -0.226451398243  
CTGCCATA -0.131223789672  
CTGCCATC -0.138422944928



CTGCCCAA -0.205891879255  
CTGCCCAC 0.0406512787502  
CTGCCCAG -0.138907497002  
CTGCCCCA -0.241452832425  
CTGCCCCC -0.188707512246  
CTGCCCGA 0.036351778776  
CTGCCCGC -0.166963880494  
CTGCCCTA -0.061063292839  
CTGCCCTC -0.342782091461  
CTGCCGAA 0.0932702203601  
CTGCCGAC -0.00790926062973  
CTGCCGCA -0.343806425249  
CTGCCGCC -0.249879071267  
CTGCCGGA 0.174331219024  
CTGCCGGC -0.244868730478  
CTGCCGTA -0.185161292101  
CTGCCGTC -0.402000909504  
CTGCCTAA -0.0796369848611  
CTGCCTAC -0.0884279906279  
CTGCCTCA -0.139058333078  
CTGCCTCC -0.1219794654  
CTGCCTGA -0.14483969683  
CTGCCTGC -0.318801465663  
CTGCCTTA -0.0319120773666  
CTGCCTTC -0.251331392252  
CTGCGAAA 0.119316838422  
CTGCGAAC -0.0272230700514  
CTGCGAAG -0.123950361763  
CTGCGACA -0.326074132879  
CTGCGACC -0.214684873197  
CTGCGAGA -0.0222947321406  
CTGCGAGC -0.346759019264  
CTGCGATA 0.0786447604629  
CTGCGATC 0.253982029591  
CTGCGCAA -0.16353711886  
CTGCGCAC -0.0858371635794  
CTGCGCAG -0.280969469457  
CTGCGCCA -0.0505012282574  
CTGCGCCC 0.0938950241966  
CTGCGCGA 0.0582841251651  
CTGCGCGC -0.147998715675  
CTGCGCTA -0.119449119698  
CTGCGCTC -0.0745071217648  
CTGCGGAA 0.00431742370605  
CTGCGGAC 0.0399094890692  
CTGCGGCA -0.163878068079  
CTGCGGCC -0.338005098594  
CTGCGGGA 0.0367488303176  
CTGCGGGC -0.326827298611  
CTGCGGTA 0.0783469419833  
CTGCGGTC -0.247946480818  
CTGCGTAA 0.107839244203  
CTGCGTAC -0.252253446621  
CTGCGTCA -0.258908907813

CTGCGTCC -0.0241116156478  
CTGCGTGA -0.143565502924  
CTGCGTGC -0.26505467595  
CTGCGTTA -0.0588841030072  
CTGCGTTC -0.140344181933  
CTGCTAAA -0.091949081407  
CTGCTAAC 0.142349277428  
CTGCTAAG -0.125955284898  
CTGCTACA 0.00977326682714  
CTGCTACC -0.184987688845  
CTGCTAGA -0.207122663376  
CTGCTAGC -0.241821551844  
CTGCTATA 0.09621880834  
CTGCTATC -0.135813814296  
CTGCTCAA -0.155612069084  
CTGCTCAC 0.0778624959674  
CTGCTCCA -0.147395942027  
CTGCTCCC -0.143189906358  
CTGCTCGA -0.0320240842286  
CTGCTCGC -0.292118385472  
CTGCTCTA -0.275627396013  
CTGCTCTC -0.305757600076  
CTGCTGAA 0.0486989336  
CTGCTGAC 0.00103547073244  
CTGCTGCA -0.34878265197  
CTGCTGCC -0.186490012682  
CTGCTGGA -0.0534998828087  
CTGCTGGC -0.264149019154  
CTGCTGTA 0.0195608831972  
CTGCTGTC -0.348279625909  
CTGCTTAA -0.132927989411  
CTGCTTAC -0.119705933442  
CTGCTTCA -0.201198481427  
CTGCTTCC -0.221470843641  
CTGCTTGA -0.021150631738  
CTGCTTGC -0.115846368328  
CTGCTTTA 0.0744850946208  
CTGCTTTC -0.163973314587  
CTGGAAAA -0.0775515178406  
CTGGAAAC 0.129289869565  
CTGGAAAG -0.0351801225192  
CTGGAAACA 0.145662191117  
CTGGAAACC -0.210448695154  
CTGGAAAGA -0.015730210792  
CTGGAAAGC -0.149850989863  
CTGGAAATA 0.127691364423  
CTGGAAATC 0.324362970154  
CTGGACAA 0.149525677911  
CTGGACAC -0.00117886481523  
CTGGACAG -0.0827508526965  
CTGGACCA -0.248321823871  
CTGGACCC -0.0753100816868  
CTGGACGA -0.0145722761646  
CTGGACGC -0.196908257832

CTGGACTA -0.142562308195  
CTGGACTC -0.259402205244  
CTGGAGAA 0.0872265570827  
CTGGAGAC -0.216425999616  
CTGGAGCA -0.0922798587686  
CTGGAGCC -0.292987407571  
CTGGAGGA -0.00750377768287  
CTGGAGGC -0.0824833941319  
CTGGAGTA -0.126703625692  
CTGGAGTC -0.243526200953  
CTGGATAA 0.0623023654099  
CTGGATAC 0.27753235329  
CTGGATCA -0.041165181858  
CTGGATCC 0.30568992161  
CTGGATGA -0.138715885186  
CTGGATGC -0.0772607574692  
CTGGATTA 0.327273855317  
CTGGATTC 0.43607657244  
CTGGCAAA 0.165852572571  
CTGGCAAC -0.0361681127295  
CTGGCAAG -0.187731716931  
CTGGCACA -0.252282944551  
CTGGCACC -0.286871037637  
CTGGCAGA -0.0387765231418  
CTGGCAGC -0.149685590577  
CTGGCATA -0.0542843118601  
CTGGCATC -0.286073172974  
CTGGCCAA -0.102548888237  
CTGGCCAC -0.0419985278184  
CTGGCCAG -0.157700225711  
CTGGCCCA -0.22443442562  
CTGGCCCC 0.0240231715345  
CTGGCCGA 0.0202917018814  
CTGGCCGC -0.322170127261  
CTGGCCTA -0.315356437035  
CTGGCCTC -0.325235012526  
CTGGCGAA 0.1314303284  
CTGGCGAC -0.0551413110595  
CTGGCGCA -0.0319079365126  
CTGGCGCC -0.130055173669  
CTGGCGGA 0.0372672948431  
CTGGCGGC -0.121331282408  
CTGGCGTA 0.0309708546528  
CTGGCGTC -0.25893165929  
CTGGCTAA -0.139712633695  
CTGGCTAC -0.175553363231  
CTGGCTCA -0.297826312187  
CTGGCTCC -0.0532112435494  
CTGGCTGA -0.112149807315  
CTGGCTGC -0.201920312644  
CTGGCTTA 0.139009364758  
CTGGCTTC -0.243293481259  
CTGGGAAA 0.0625029297817  
CTGGGAAC -0.299575756072

CTGGGAAG -0.0640776373082  
CTGGGACA -0.144779026775  
CTGGGACC -0.19707960771  
CTGGGAGA -0.0273152858076  
CTGGGAGC -0.281281268865  
CTGGGATA 0.137905122754  
CTGGGATC 0.0420421450625  
CTGGGCAA -0.273027213416  
CTGGGCAC -0.213903566438  
CTGGGCCA -0.138518252533  
CTGGGCCC -0.134293607272  
CTGGGCGA -0.052817389705  
CTGGGCGC -0.223739990923  
CTGGGCTA -0.226816226999  
CTGGGCTC -0.378438181672  
CTGGGGAA -0.0376285376285  
CTGGGGAC -0.261963829418  
CTGGGGCA -0.213054102699  
CTGGGGCC -0.0750581345276  
CTGGGGGA -0.0804705823972  
CTGGGGGC -0.260538905643  
CTGGGGTA -0.0830184079885  
CTGGGGTC -0.244360922981  
CTGGGTAA -0.025800344209  
CTGGGTAC -0.220798011829  
CTGGGTCA -0.340135592825  
CTGGGTCC -0.235640739362  
CTGGGTGA -0.101129262286  
CTGGGTGC -0.265620133566  
CTGGGTTA -0.136921868819  
CTGGGTTC -0.167739369659  
CTGGTAAA 0.0106296942403  
CTGGTAAC 0.0896965759874  
CTGGTAAG -0.0462402913224  
CTGGTACA -0.0512708048406  
CTGGTACC -0.153297704821  
CTGGTAGA -0.0395466439465  
CTGGTAGC -0.34120835504  
CTGGTATA -0.0522905825936  
CTGGTATC 0.078359597965  
CTGGTCAA -0.0671596480192  
CTGGTCAC -0.186510444106  
CTGGTCCA -0.147642132491  
CTGGTCCC -0.206499581948  
CTGGTCGA -0.0726634582963  
CTGGTCGC -0.248978742967  
CTGGTCTA -0.183257139667  
CTGGTCTC -0.240356505354  
CTGGTGAA 0.140799106589  
CTGGTGAC -0.216414229489  
CTGGTGCA -0.180389967673  
CTGGTGCC -0.199494134998  
CTGGTGGA -0.219371350257  
CTGGTGGC -0.253364317923

CTGGTGTA 0.184920768158  
CTGGTGTC -0.216911491057  
CTGGTTAA -0.162512424198  
CTGGTTAC 0.140273570652  
CTGGTTCA -0.118042289977  
CTGGTTCC -0.0419138146411  
CTGGTTGA -0.111036763429  
CTGGTTGC -0.202120951604  
CTGGTTTA 0.0257461318067  
CTGGTTTC -0.220447776223  
CTGTAAAA 0.0293095771625  
CTGTAAAC -0.0976910826863  
CTGTAAAG 0.050199630665  
CTGTAACA 0.136353984839  
CTGTAACC 0.126052050282  
CTGTAAGA -0.00301335392349  
CTGTAAGC -0.249716686933  
CTGTAATA 0.179148631782  
CTGTAATC 0.405199156223  
CTGTACAA -0.127763301209  
CTGTACAC -0.045785610341  
CTGTACAG -0.200186034975  
CTGTACCA -0.222349026775  
CTGTACCC -0.20851770064  
CTGTACGA -0.137981091342  
CTGTACGC -0.00530695985241  
CTGTACTA 0.0836442503109  
CTGTACTC -0.230108318377  
CTGTAGAA -0.024493138447  
CTGTAGAC -0.0713085856627  
CTGTAGCA -0.0235882638019  
CTGTAGCC -0.00565316087969  
CTGTAGGA 0.0634168594848  
CTGTAGGC -0.0259735764526  
CTGTAGTA 0.169954672525  
CTGTAGTC -0.250058584004  
CTGTATAA 0.0632685026624  
CTGTATAC 0.101570768523  
CTGTATCA 0.0969956862258  
CTGTATCC 0.183931185944  
CTGTATGA -0.156034501631  
CTGTATGC -0.0947870565689  
CTGTATTA 0.238423246206  
CTGTATTC 0.0826763402521  
CTGTCAA -0.111337187663  
CTGTCAAC -0.0811321525905  
CTGTCAAG -0.0272966925175  
CTGTCACA -0.125149246529  
CTGTCACC -0.054275540182  
CTGTCAGA -0.0130239693585  
CTGTCAGC -0.0451632738031  
CTGTCATA 0.0826222783443  
CTGTCATC -0.0601002958148  
CTGTCCAA -0.157622706956

CTGTCCAC 0.107218789037  
CTGTCCCA -0.0341804387206  
CTGTCCCC -0.185032749482  
CTGTCCGA -0.210935496944  
CTGTCCGC -0.213348231032  
CTGTCCTA -0.110881061191  
CTGTCCTC -0.225973811772  
CTGTGCGAA 0.134486836055  
CTGTGCGAC -0.0919456988314  
CTGTGCGA -0.098840495788  
CTGTGCGC -0.0338469937219  
CTGTGCGA -0.0874552238189  
CTGTGCGC -0.087072742362  
CTGTGCGTA 0.0433270886578  
CTGTGCGTC -0.233909642007  
CTGTCTAA 0.00894505959724  
CTGTCTAC -0.0629219798107  
CTGTCTCA -0.033491886228  
CTGTCTCC -0.154233690333  
CTGTCTGA -0.0967081012825  
CTGTCTGC -0.285501217169  
CTGTCTTA 0.239714921533  
CTGTCTTC 0.116069721101  
CTGTGAAA 0.168664189835  
CTGTGAAC -0.0933178899491  
CTGTGAAG -0.0653999365946  
CTGTGACA -0.0822990817627  
CTGTGACC -0.0725248886742  
CTGTGAGA 0.0810894651942  
CTGTGAGC -0.169944116407  
CTGTGATA 0.29215053685  
CTGTGATC -0.00360649036882  
CTGTGCAA -0.0200243170145  
CTGTGCAC -0.0714629763967  
CTGTGCCA -0.069941251644  
CTGTGCCC -0.201705632466  
CTGTGCGA 0.158556381977  
CTGTGCGC -0.168663117529  
CTGTGCTA -0.0959531449781  
CTGTGCTC -0.158494826431  
CTGTGGAA -0.0945929179384  
CTGTGGAC -0.0922247586909  
CTGTGGCA -0.264747316853  
CTGTGGCC -0.149662368028  
CTGTGGGA -0.245941135614  
CTGTGGGC -0.116573572833  
CTGTGGTA 0.0757727932965  
CTGTGGTC -0.0282190900929  
CTGTGTAA 0.04613153098  
CTGTGTAC -0.115663195392  
CTGTGTCA -0.137785415618  
CTGTGTCC -0.0304059035204  
CTGTGTGA 0.0739808681317  
CTGTGTGC 0.010556179193

CTGTGTTA 0.0572747350919  
CTGTGTTC -0.112652277687  
CTGTTAAA 0.108966227017  
CTGTTAAC 0.18987444745  
CTGTTAAG 0.0272891834485  
CTGTTACA 0.0305708634118  
CTGTTACC -0.312153234275  
CTGTTAGA -0.00998921947333  
CTGTTAGC -0.0885798121209  
CTGTTATA 0.313606016232  
CTGTTATC 0.122846215046  
CTGTTCAA -0.17004887246  
CTGTTCAC -0.223937894308  
CTGTTCCA -0.001407998365  
CTGTTCCC -0.0284498374649  
CTGTTCGA 0.0197973766998  
CTGTTCGC -0.0651491712098  
CTGTTCTA 0.211587337504  
CTGTTCTC -0.106923728136  
CTGTTGAA 0.0427684976048  
CTGTTGAC -0.0760857276009  
CTGTTGCA -0.242420637643  
CTGTTGCC -0.235359060388  
CTGTTGGA -0.0186749124602  
CTGTTGGC -0.162975330294  
CTGTTGTA 0.18822288563  
CTGTTGTC -0.100926987  
CTGTTTAA -0.123637681999  
CTGTTTAC 0.130878155953  
CTGTTTCA -0.248291154944  
CTGTTTCC 0.05764580007  
CTGTTTGA -0.0537245234215  
CTGTTTGC -0.0229722463498  
CTGTTTTA 0.0658138872871  
CTGTTTTC -0.0102576829218  
CTTAAAAA 0.0650839762633  
CTTAAAAC -0.0464207679177  
CTTAAAAG -0.0050779909929  
CTTAAACA -0.105611290895  
CTTAAACC 0.18796595695  
CTTAAAGA -0.101251478531  
CTTAAAGC -0.192006539678  
CTTAAATA 0.0468553953402  
CTTAAATC 0.100352418534  
CTTAACAA 0.0933426539487  
CTTAAACAC -0.00537552788195  
CTTAAACCA -0.0770135287517  
CTTAAACCC -0.0190776844303  
CTTAAACGA 0.0286939832394  
CTTAAACGC -0.149880195107  
CTTAAACTA 0.0604008671343  
CTTAAACTC -0.252377589007  
CTTAAAGAA 0.0144252315643  
CTTAAAGAC -0.139002865346

CTTAAGCA 0.119967074513  
CTTAAGCC -0.0999854054015  
CTTAAGGA 0.0757678677098  
CTTAAGGC -0.125969489179  
CTTAAGTA -0.113689408771  
CTTAAGTC -0.162086913622  
CTTAATAA 0.0860966548178  
CTTAATAC 0.164894929308  
CTTAATCA 0.192155646227  
CTTAATCC -0.0735487534468  
CTTAATGA 0.00941074283045  
CTTAATGC 0.0588446968315  
CTTAATTA 0.173534156186  
CTTAATTC 0.0158877064096  
CTTACAAA 0.178419759408  
CTTACAAC 0.00130847100544  
CTTACAAG 0.0195994892965  
CTTACACA -0.0651934805866  
CTTACACC 0.139179124028  
CTTACAGA -0.0633439494837  
CTTACAGC -0.235084685158  
CTTACATA -0.202501405079  
CTTACATC -0.0383181390189  
CTTACCAA 0.158366605111  
CTTACCAC -0.223928776205  
CTTACCCA -0.27673184781  
CTTACCCC -0.0908000741553  
CTTACCGA -0.0449863709327  
CTTACCGC -0.127662947432  
CTTACCTA 0.108816909614  
CTTACCTC -0.0842753865398  
CTTACGAA 0.117021738591  
CTTACGAC -0.0622468623705  
CTTACGCA 0.017173092071  
CTTACGCC 0.0328189893652  
CTTACGGA 0.118778558172  
CTTACGGC -0.119726265733  
CTTACGTA -0.0142047984351  
CTTACGTC -0.165122891419  
CTTACTAA -0.0658227164523  
CTTACTAC -0.163226591753  
CTTACTCA 0.0278611945279  
CTTACTCC -0.157880951002  
CTTACTGA 0.0201302161267  
CTTACTGC -0.264014678434  
CTTACTTA -0.0512895815926  
CTTACTTC -0.0413171694999  
CTTAGAAA 0.149045739955  
CTTAGAAC -0.0884466830426  
CTTAGAAG -0.102232372006  
CTTAGACA -0.103670376436  
CTTAGACC -0.209202294627  
CTTAGAGA -0.176262604886  
CTTAGAGC -0.177491480403



CTTAGATA 0.263038765574  
CTTAGATC 0.118317847054  
CTTAGCAA 0.0488273979402  
CTTAGCAC -0.313626023426  
CTTAGCCA -0.0968034981211  
CTTAGCCC -0.0367221906754  
CTTAGCGA 0.153842097427  
CTTAGCGC -0.212757868313  
CTTAGCTA -0.00268361643772  
CTTAGCTC -0.184243472122  
CTTAGGAA 0.00105201620353  
CTTAGGAC -0.267652336418  
CTTAGGCA 0.0401898556423  
CTTAGGCC -0.117583884105  
CTTAGGGA -0.325624884173  
CTTAGGGC -0.219324103652  
CTTAGGTA -0.0948190057101  
CTTAGGTC -0.217758286222  
CTTAGTAA 0.00751114153878  
CTTAGTAC 0.0515963471012  
CTTAGTCA -0.0575323808954  
CTTAGTCC -0.118927682242  
CTTAGTGA -0.108857461853  
CTTAGTGC -0.236706285204  
CTTAGTTA -0.115406620191  
CTTAGTTC -0.201584790969  
CTTATAAA 0.154822157179  
CTTATAAC 0.152207819691  
CTTATAAG 0.0110570867064  
CTTATACA -0.0159569395803  
CTTATACC -0.044632787057  
CTTATAGA -0.0101815288716  
CTTATAGC 0.20521485673  
CTTATATA 0.0373882323745  
CTTATATC 0.0683507744318  
CTTATCAA -0.0726608150851  
CTTATCAC -0.0964970667788  
CTTATCCA 0.0810852174489  
CTTATCCC 0.0627859264223  
CTTATCGA 0.188709376131  
CTTATCGC -0.0437385393832  
CTTATCTA 0.111460832966  
CTTATCTC -0.0757646666738  
CTTATGAA 0.0912910155334  
CTTATGAC 0.0359605264118  
CTTATGCA 0.0935615180322  
CTTATGCC 0.0874864054072  
CTTATGGA -0.0778012160318  
CTTATGGC -0.108389056508  
CTTATGTA -0.104729539965  
CTTATGTC -0.271746472893  
CTTATTAA -0.0988845323473  
CTTATTAC 0.245908442878  
CTTATTCA -0.0467781831418

CTTATTCC 0.0563100230786  
CTTATTGA 0.153957942527  
CTTATTGC 0.0547503426291  
CTTATTTA 0.159670689974  
CTTATTTC 0.121199712109  
CTTCAAAA 0.00671056731663  
CTTCAAAC -0.00254981760429  
CTTCAAAG 0.0532156230156  
CTTCAACA -0.0559790661518  
CTTCAACC 0.0479501540108  
CTTCAAGA -0.0215890598889  
CTTCAAGC -0.21315848242  
CTTCAATA 0.107608592513  
CTTCAATC -0.281086772566  
CTTCACAA -0.0718969657599  
CTTCACAC -0.0651435581469  
CTTCACCA -0.0165743558309  
CTTCACCC -0.208063542468  
CTTCACGA -0.0782433081429  
CTTCACGC -0.197473570208  
CTTCACTA -0.158808221048  
CTTCACTC -0.174394085981  
CTTCAGAA 0.0701320409042  
CTTCAGAC -0.0731363936924  
CTTCAGCA 0.0189964513487  
CTTCAGCC -0.24214161366  
CTTCAGGA -0.0142201265666  
CTTCAGGC -0.210762949915  
CTTCAGTA -0.107031677576  
CTTCAGTC -0.316616087696  
CTTCATAA -0.0979246310301  
CTTCATAC -0.116588497076  
CTTCATCA 0.119176222418  
CTTCATCC -0.287727084978  
CTTCATGA 0.0968695968696  
CTTCATGC -0.150272622385  
CTTCATTA 0.206505696956  
CTTCATTC 0.0915612582279  
CTTCCAAA -0.116693207146  
CTTCCAAC -0.197358684436  
CTTCCAAG -0.0704248893145  
CTTCCACA -0.108292079208  
CTTCCACC -0.123450888928  
CTTCCAGA -0.156694152387  
CTTCCAGC -0.14436784662  
CTTCCATA 0.0504978475992  
CTTCCATC -0.132364253674  
CTTCCCAA -0.0395813354002  
CTTCCCAC -0.257692829756  
CTTCCCCA -0.322271971821  
CTTCCCCC -0.231573593986  
CTTCCCGA -0.0870150040214  
CTTCCCGC -0.25818590841  
CTTCCCTA -0.0755970768216

CTTCCCTC -0.284992516517  
CTTCCGAA -0.0141808475142  
CTTCCGAC -0.110916701826  
CTTCCGCA 0.0441034137939  
CTTCCGCC -0.257234420874  
CTTCCGGA -0.0155265458296  
CTTCCGGC -0.149662279505  
CTTCCGTA -0.105156711418  
CTTCCGTC -0.239879320949  
CTTCCTAA -0.118628156456  
CTTCCTAC -0.191694943701  
CTTCCTCA -0.149511891864  
CTTCCTCC -0.238305414205  
CTTCCTGA 0.0249339444101  
CTTCCTGC -0.20836041982  
CTTCCTTA 0.0332569359795  
CTTCCTTC -0.150338047389  
CTTCGAAA 0.0213593862908  
CTTCGAAC -0.0829250100257  
CTTCGAAG -0.0865090192512  
CTTCGACA 0.00791363966118  
CTTCGACC -0.193901590191  
CTTCGAGA -0.160962407639  
CTTCGAGC -0.0894159971395  
CTTCGATA 0.178896553886  
CTTCGATC -0.0763001064052  
CTTCGCAA 0.111495793314  
CTTCGCAC -0.209213644146  
CTTCGCCA -0.0287768051462  
CTTCGCCC -0.188219614588  
CTTCGCGA 0.0544745847776  
CTTCGCGC -0.101044690935  
CTTCGCTA -0.043649824544  
CTTCGCTC -0.324849296718  
CTTCGGAA -0.199176873055  
CTTCGGAC -0.187566490041  
CTTCGGCA 0.102461101323  
CTTCGGCC -0.120950983798  
CTTCGGGA -0.124023666355  
CTTCGGGC -0.236193785361  
CTTCGGTA -0.0252277070459  
CTTCGGTC -0.10766894047  
CTTCGTAA 0.0501762735123  
CTTCGTAC -0.0339382235437  
CTTCGTCA -0.142188057047  
CTTCGTCC -0.305298189136  
CTTCGTGA 0.0179559725014  
CTTCGTGC -0.264787603994  
CTTCGTTA 0.0671656825033  
CTTCGTTC -0.205730480499  
CTTCTAAA 0.193901593396  
CTTCTAAC -0.00617577717276  
CTTCTACA -0.0891812588046  
CTTCTACC -0.100968253713

CTTCTAGA -0.0319971434322  
CTTCTAGC -0.0699245363133  
CTTCTATA -0.0489544024583  
CTTCTATC -0.126805348575  
CTTCTCAA -0.0245724546178  
CTTCTCAC -0.247348789425  
CTTCTCCA -0.178965534856  
CTTCTCCC -0.205533640421  
CTTCTCGA 0.0950610832218  
CTTCTCGC -0.199035808175  
CTTCTCTA 0.138548060991  
CTTCTCTC -0.189326694722  
CTTCTGAA -0.125544642036  
CTTCTGAC -0.00367171579293  
CTTCTGCA 0.147817930994  
CTTCTGCC -0.0854291800371  
CTTCTGGA -0.136378496319  
CTTCTGGC -0.292201162279  
CTTCTGTA -0.0969437279862  
CTTCTGTC -0.243017159234  
CTTCTTAA -0.182862609848  
CTTCTTAC -0.0131474817664  
CTTCTTCA 0.0299652269349  
CTTCTTCC -0.314491759745  
CTTCTTGA -0.0697672444084  
CTTCTTGC -0.069298482515  
CTTCTTTA -0.0894849017905  
CTTCTTTC -0.0926992083778  
CTTGAAAA 0.0522583056103  
CTTGAAAC -0.0262966590711  
CTTGAAAG -0.222238847148  
CTTGAACA -0.205572962805  
CTTGAAACC 0.0325518355821  
CTTGAAAGA 0.0703836513884  
CTTGAAAGC -0.0524572243532  
CTTGAAATA -0.0382738110011  
CTTGAAATC -0.224235060604  
CTTGACAA 0.141178660321  
CTTGACAC 0.0156966382176  
CTTGACCA -0.260844343195  
CTTGACCC -0.245694331833  
CTTGACGA 0.00582104041517  
CTTGACGC -0.00331841631442  
CTTGACTA -0.0829769340006  
CTTGACTC -0.218025475425  
CTTGAGAA 0.158468849645  
CTTGAGAC 0.028927103786  
CTTGAGCA -0.022803150296  
CTTGAGCC -0.207601340752  
CTTGAGGA -0.0399816924048  
CTTGAGGC -0.0453542623154  
CTTGAGTA 0.0521703904294  
CTTGAGTC -0.265896941777  
CTTGATAA 0.189231890627

CTTGATAC 0.128112961446  
CTTGATCA -0.0677034753453  
CTTGATCC -0.0247680707722  
CTTGATGA 0.0508256382188  
CTTGATGC -0.252617776215  
CTTGATTA 0.271318876229  
CTTGATTC 0.262200827719  
CTTGCAAA 0.0859495859496  
CTTGCAAC -0.0315873390079  
CTTGCAAG 0.0151364805305  
CTTGCAACA -0.241217659789  
CTTGCAACC -0.111885439158  
CTTGCAAGA -0.167689312283  
CTTGCAAGC -0.131706701191  
CTTGCAATA 0.00192754738209  
CTTGCAATC -0.0577624494455  
CTTGCCAA 0.118792962255  
CTTGCCAC -0.16119147458  
CTTGCCCA -0.384458628283  
CTTGCCCC -0.161688456672  
CTTGCCGA -0.0544174215163  
CTTGCCGC -0.0996566985151  
CTTGCCCTA -0.0372721261511  
CTTGCCCTC -0.358127797047  
CTTGCGAA 0.195332219003  
CTTGCGAC 0.0690691063299  
CTTGCGCA 0.0312803369269  
CTTGCGCC -0.148772646688  
CTTGCGGA 0.0220011260187  
CTTGCGGC -0.167006720813  
CTTGCGTA -0.109949833386  
CTTGCGTC -0.151511266608  
CTTGCTAA 0.121712621713  
CTTGCTAC 0.0407473589292  
CTTGCTCA -0.0304467785377  
CTTGCTCC -0.32242383457  
CTTGCTGA 0.070187514142  
CTTGCTGC -0.227853168068  
CTTGCTTA 0.0477062546076  
CTTGCTTC -0.132382015966  
CTTGAAA 0.183032895154  
CTTGAAAC -0.181272403189  
CTTGACA -0.165751053417  
CTTGACC -0.138219486704  
CTTGAGA 0.0741099983506  
CTTGAGC -0.263702453912  
CTTGATA 0.113427443195  
CTTGATC 0.174909068848  
CTTGCAA 0.0638834426713  
CTTGCAC -0.14954866204  
CTTGCCA -0.0459215326203  
CTTGCCC -0.000587520052315  
CTTGCGA 0.00720787136048  
CTTGCGC -0.305516275659

CTTGGCTA -0.0675869824448  
CTTGGCTC -0.187616659783  
CTTGGGAA 0.0910979850374  
CTTGGGAC -0.0180627748755  
CTTGGGCA -0.0866457845886  
CTTGGGCC -0.245473513726  
CTTGGGGA -0.0999537574671  
CTTGGGGC -0.254082068958  
CTTGGGTA -0.173661254615  
CTTGGGTC -0.275688072796  
CTTGGTAA 0.143792552883  
CTTGGTAC -0.130094068451  
CTTGGTCA -0.120773796407  
CTTGGTCC -0.019301539014  
CTTGGTGA 0.0520798814624  
CTTGGTGC -0.202917505162  
CTTGGTTA -0.0889875955014  
CTTGGTTC -0.113595566034  
CTTGTAAG 0.210225323533  
CTTGTAAC 0.184246330372  
CTTGTACA -0.0666357671  
CTTGTACC -0.149061401191  
CTTGTAGA 0.0360627139552  
CTTGTAGC -0.0883549876438  
CTTGTATA 0.0522092215301  
CTTGTATC -0.0179035785096  
CTTGTCAA -0.0546331102239  
CTTGTCC -0.0133256209215  
CTTGTCCA -0.0114599274793  
CTTGTCCC -0.0867124103531  
CTTGTCCG -0.0658110401941  
CTTGTCCG -0.20339263413  
CTTGTCTA -0.092108009792  
CTTGTCTC -0.199989683411  
CTTGTGAA 0.0431669851354  
CTTGTGAC 0.0499317533193  
CTTGTGCA -0.231894137205  
CTTGTGCC -0.254388525114  
CTTGTGGA -0.0644197572316  
CTTGTGGC -0.154215153545  
CTTGTGTA -0.0132170738231  
CTTGTGTC -0.214803693685  
CTTGTTAA 0.139345123829  
CTTGTTAC -0.0467287979946  
CTTGTTCA -0.176475696598  
CTTGTTCC -0.196234958442  
CTTGTTGA -0.0436260519843  
CTTGTTGC -0.103583863127  
CTTGTTTA -0.0349693072414  
CTTGTTTC -0.171186089383  
CTTTAAAA 0.131850397437  
CTTTAAAC -0.0231885433166  
CTTTAAAG -0.161053578073  
CTTTAACA 0.0193706102797

CTTTAACC 0.0958754898149  
CTTTAAGA -0.165887724287  
CTTTAAGC -0.0393851151427  
CTTTAATA 0.151742651743  
CTTTAATC -0.0709713435058  
CTTTACAA 0.0735487553669  
CTTTACAC 0.12896578907  
CTTTACCA -0.0176371000874  
CTTTACCC -0.249677801818  
CTTTACGA 0.121227287894  
CTTTACGC 0.0340161097737  
CTTTACTA 0.127079698985  
CTTTACTC -0.228653975547  
CTTTAGAA 0.119754311949  
CTTTAGAC 0.142766946709  
CTTTAGCA -0.024181222309  
CTTTAGCC -0.264344008136  
CTTTAGGA 0.0108807836325  
CTTTAGGC -0.171879092671  
CTTTAGTA 0.0581669824094  
CTTTAGTC -0.211646933316  
CTTTATAA 0.142401991197  
CTTTATAC 0.209471567922  
CTTTATCA 0.0355189900644  
CTTTATCC 0.0956921108436  
CTTTATGA 0.0832289004144  
CTTTATGC 0.0351225885565  
CTTTATTA 0.166556206798  
CTTTATTC 0.0566804131522  
CTTTCAA 0.0851010561813  
CTTTCAAC -0.0485954273833  
CTTTCACA -0.100762432615  
CTTTCACC -0.0321958886545  
CTTTCAGA -0.124672807344  
CTTTCAGC -0.211001884069  
CTTTCATA 0.0599814690724  
CTTTCATC 0.0305095508857  
CTTTCCAA -0.0666729432784  
CTTTCAC -0.0724142975251  
CTTTCCCA -0.259689730168  
CTTTCCCC -0.104786756494  
CTTTCCGA 0.00560470856829  
CTTTCCGC 0.0351220217112  
CTTTCCTA -0.0767318963818  
CTTTCCTC -0.287883651538  
CTTTCGAA 0.0471871355188  
CTTTCGAC -0.089313238096  
CTTTCGCA 0.0686527533067  
CTTTCGCC -0.0556754923613  
CTTTCGGA -0.0595890920821  
CTTTCGGC 0.000932061538122  
CTTTCGTA -0.0801560711971  
CTTTCGTC -0.282998558359  
CTTTCCTAA 0.0747620899136

CTTTCTAC 0.0704269249578  
CTTTCTCA -0.125550480745  
CTTTCTCC -0.150557113433  
CTTTCTGA 0.133248906958  
CTTTCTGC -0.112703612704  
CTTTCTTA -0.0485984201774  
CTTTCTTC -0.0307985268207  
CTTTGAAA 0.0725700789911  
CTTTGAAC -0.0616777864219  
CTTTGACA -0.0915044843111  
CTTTGACC -0.115394047145  
CTTTGAGA 0.0738189980614  
CTTTGAGC -0.0544677448264  
CTTTGATA 0.0493802268159  
CTTTGATC 0.0237447355167  
CTTTGCAA 0.139526141763  
CTTTGCAC -0.242640146659  
CTTTGCCA -0.0157432566565  
CTTTGCCC 0.00636409421691  
CTTTGCGA 0.073348046879  
CTTTGCGC -0.202200053492  
CTTTGCTA 0.0771860014284  
CTTTGCTC -0.18091291798  
CTTTGGAA 0.0529626896376  
CTTTGGAC 0.0214057032239  
CTTTGGCA -0.0951205912276  
CTTTGGCC -0.156166295991  
CTTTGGGA 0.0421092140854  
CTTTGGGC -0.161246284219  
CTTTGGTA -0.111208513682  
CTTTGGTC -0.0976934000634  
CTTTGTAA -0.0071959011353  
CTTTGTAC 0.155613380729  
CTTTGTCA 0.102470238834  
CTTTGTCC -0.0477368310051  
CTTTGTGA -0.0188061575294  
CTTTGTGC -0.149627589022  
CTTTGTTA 0.00986182784319  
CTTTGTTC -0.246050451672  
CTTTTAAA 0.20791296541  
CTTTTAAC 0.00491155799766  
CTTTTACA -0.266460347708  
CTTTTACC -0.135280087135  
CTTTTAGA -0.100966598208  
CTTTTAGC -0.0419055419055  
CTTTTATA 0.203393476121  
CTTTTATC -0.00576029559774  
CTTTTCAA 0.0293859757964  
CTTTTCAC 0.00920526204046  
CTTTTCCA -0.0627183224017  
CTTTTCCC -0.00381678205415  
CTTTTCGA 0.113044969818  
CTTTTCGC -0.14578732766  
CTTTTCTA 0.074080145886



CTTTTCTC -0.0671469252697  
CTTTTGAA 0.0655931413507  
CTTTTGAC -0.0414888725064  
CTTTTGCA -0.0493853199121  
CTTTTGCC -0.337510487266  
CTTTTGGA -0.0100730020772  
CTTTTGGC -0.10460930532  
CTTTTGTA 0.142416521204  
CTTTTGTC -0.0834071613411  
CTTTTAA -0.00894514069846  
CTTTTAC 0.136402242463  
CTTTTCA -0.0268940715258  
CTTTTCC -0.357751808456  
CTTTTGA 0.0606431975942  
CTTTTGC 0.0938833456202  
CTTTTTA 0.232729975154  
CTTTTTC -0.017019335343  
GAAAAAAA 0.134577345022  
GAAAAAAC -0.109922653762  
GAAAAACA -0.141398601013  
GAAAAACC 0.0492633198742  
GAAAAAGA -0.0413542504419  
GAAAAAGC -0.179170127146  
GAAAAATA 0.176626228399  
GAAAAATC 0.396703866401  
GAAAACAA -0.0392513000169  
GAAAACAC -0.128901899478  
GAAAACCA -0.252383426267  
GAAAAACC -0.172062070989  
GAAAAACGA 0.0416830288388  
GAAAAACGC 0.0650636862758  
GAAAAACTA -0.0399421460028  
GAAAAACTC -0.24858402934  
GAAAAGAA 0.087376961356  
GAAAAGAC -0.120922816466  
GAAAAGCA -0.171384848012  
GAAAAGCC -0.117864303394  
GAAAAGGA 0.0776618030262  
GAAAAGGC -0.10549751717  
GAAAAGTA 0.0355284190857  
GAAAAGTC -0.196248961856  
GAAAATAA 0.165327036634  
GAAAATAC 0.248887250644  
GAAAATCA 0.393114434594  
GAAAATCC 0.478088071064  
GAAAATGA 0.00288029075908  
GAAAATGC 0.224439784599  
GAAAATTA 0.167651122197  
GAAAATTC 0.238315219375  
GAAACAAA 0.0546754450632  
GAAACAAC -0.0197589197221  
GAAACACA -0.120587424789  
GAAACACC 0.0469050317535  
GAAACAGA 0.00703596158142

GAAACAGC -0.159389844153  
GAAACATA 0.148743458172  
GAAACATC 0.170814064753  
GAAACCAA 0.0941699275033  
GAAACCAC -0.240175281128  
GAAACCCA -0.321613521255  
GAAACCCC -0.364678159494  
GAAACCGA 0.0928904110722  
GAAACCGC -0.107443632621  
GAAACCTA -0.0352459897914  
GAAACCTC -0.151304602927  
GAAACGAA 0.126519127318  
GAAACGAC -0.166509515893  
GAAACGCA -0.0822544842895  
GAAACGCC -0.228599177781  
GAAACGGA -0.0691379020897  
GAAACGGC -0.133166265539  
GAAACGTA 0.0650343423137  
GAAACGTC -0.0535949172313  
GAAACTAA 0.091308219528  
GAAACTAC 0.0134721498358  
GAAACTCA -0.26781714199  
GAAACTCC -0.24758811709  
GAAACTGA 0.0251169682416  
GAAACTGC -0.120435633622  
GAAACTTA -0.130689191576  
GAAACTTC -0.034435012372  
GAAAGAAA 0.125038867762  
GAAAGAAC -0.201022110454  
GAAAGACA -0.177120874405  
GAAAGACC -0.0899633039158  
GAAAGAGA -0.0931799568163  
GAAAGAGC -0.257719610194  
GAAAGATA 0.0807215900382  
GAAAGATC 0.19598621928  
GAAAGCAA 0.161959480141  
GAAAGCAC -0.309318552912  
GAAAGCCA -0.227035124253  
GAAAGCCC -0.312809951721  
GAAAGCGA -0.109461512972  
GAAAGCGC 0.0477354510485  
GAAAGCTA -0.029526771951  
GAAAGCTC -0.209008210176  
GAAAGGAA -0.0752096240966  
GAAAGGAC -0.178901927705  
GAAAGGCA -0.183749644257  
GAAAGGCC -0.198769346196  
GAAAGGGA -0.0631752683439  
GAAAGGGC -0.265007915606  
GAAAGGTA 0.00736261249754  
GAAAGGTC -0.189355888265  
GAAAGTAA 0.0428596454092  
GAAAGTAC -0.0977416552922  
GAAAGTCA -0.263741761559

GAAAGTCC -0.415613458303  
GAAAGTGA 0.105426363002  
GAAAGTGC 0.0212469799931  
GAAAGTTA -0.238170554223  
GAAAGTTC 0.0684999598549  
GAAATAAA 0.24353682225  
GAAATAAC 0.0684488660832  
GAAATACA -0.10582069673  
GAAATACC 0.0522216294017  
GAAATAGA 0.10070614808  
GAAATAGC 0.140915892353  
GAAATATA 0.334021152821  
GAAATATC 0.421718502515  
GAAATCAA 0.423005650278  
GAAATCAC 0.4382904024  
GAAATCCA 0.471889244617  
GAAATCCC 0.479469827955  
GAAATCGA 0.409146060661  
GAAATCGC 0.439058738864  
GAAATCTA 0.481165738741  
GAAATCTC 0.487962307395  
GAAATGAA -0.0379969781684  
GAAATGAC -0.203029576141  
GAAATGCA -0.0462542432239  
GAAATGCC -0.0192138533868  
GAAATGGA 0.0158040866743  
GAAATGGC -0.27013334423  
GAAATGTA 0.118925133026  
GAAATGTC 0.0652236258297  
GAAATTAA 0.175278612028  
GAAATTAC 0.28793749042  
GAAATTCA -0.150994308436  
GAAATTCC 0.175388130187  
GAAATTGA 0.181541045177  
GAAATTGC 0.265082516441  
GAAATTTA 0.235534432504  
GAAATTTTC 0.402111086304  
GAACAAAA 0.0310584439757  
GAACAAAC -0.158693910081  
GAACAACA 0.0705407910776  
GAACAACC -0.25342335808  
GAACAAGA -0.0370549612974  
GAACAAGC -0.0371239007603  
GAACAATA 0.189080264838  
GAACAATC 0.267721874703  
GAACACAA 0.0277650854361  
GAACACAC -0.181385075428  
GAACACCA -0.228424392159  
GAACACCC -0.285564625738  
GAACACGA -0.0528699643532  
GAACACGC 0.0965363426558  
GAACACTA 0.064371583104  
GAACACTC -0.233268204937  
GAACAGAA 0.136136434969

GAACAGAC -0.0508869751294  
GAACAGCA -0.249653303337  
GAACAGCC -0.208594191512  
GAACAGGA 0.224231952751  
GAACAGGC -0.279719624365  
GAACAGTA 0.031335743457  
GAACAGTC -0.084479796601  
GAACATAA 0.0149901826967  
GAACATAC -0.0705685276965  
GAACATCA -0.11785653289  
GAACATCC -0.0378146741783  
GAACATGA 0.113060525597  
GAACATGC -0.105793750538  
GAACATTA -0.0627804112653  
GAACATTC -0.145731845288  
GAACCAAA 0.0448450033941  
GAACCAAC -0.134502706295  
GAACCACA -0.261706543521  
GAACCACC -0.186172829055  
GAACCAGA 0.150783014419  
GAACCAGC -0.290126060265  
GAACCATA 0.0682926651241  
GAACCATC 0.0452917089407  
GAACCCAA -0.0565192003095  
GAACCCAC -0.244295902389  
GAACCCCA -0.325222379342  
GAACCCCC -0.327483566911  
GAACCCGA -0.0340437800632  
GAACCCGC -0.225495061427  
GAACCCTA -0.28478021986  
GAACCCTC -0.361778736844  
GAACCGAA 0.0589832256499  
GAACCGAC -0.173404840685  
GAACCGCA -0.139129451792  
GAACCGCC -0.240778953175  
GAACCGGA -0.0064061110957  
GAACCGGC -0.395586861447  
GAACCGTA -0.172730931333  
GAACCGTC -0.238366827937  
GAACCTAA -0.079726413731  
GAACCTAC -0.295254908122  
GAACCTCA -0.292975522095  
GAACCTCC -0.261343620531  
GAACCTGA 0.080073429049  
GAACCTGC 0.0738099996473  
GAACCTTA -0.215684977019  
GAACCTTC -0.0956066259097  
GAACGAAA 0.0498697108822  
GAACGAAC -0.299083459212  
GAACGACA -0.199552675555  
GAACGACC -0.188180713028  
GAACGAGA 0.0909374247279  
GAACGAGC -0.0253582412642  
GAACGATA 0.0819759153092

GAACGATC 0.0732040580525  
GAACGCAA 0.0527510982056  
GAACGCAC -0.280063129747  
GAACGCCA -0.23366049553  
GAACGCCC -0.34491355146  
GAACGCGA 0.0073420527966  
GAACGCGC -0.204759916919  
GAACGCTA 0.0087757202397  
GAACGCTC -0.115831860203  
GAACGGAA 0.123298759881  
GAACGGAC -0.0867872040672  
GAACGGCA -0.0974867278855  
GAACGGCC -0.10374091993  
GAACGGGA -0.232209243093  
GAACGGGC -0.33318174928  
GAACGGTA -0.043404159033  
GAACGGTC 0.013820297528  
GAACGTAA 0.221636236788  
GAACGTAC -0.271911053219  
GAACGTCA -0.27117452941  
GAACGTCC -0.304784984247  
GAACGTGA 0.0103985262368  
GAACGTGC 0.0869202535869  
GAACGTTA -0.0142663324482  
GAACGTTC -0.221027464274  
GAACTAAA 0.059565848923  
GAACTAAC -0.012939418363  
GAACTACA -0.232200413024  
GAACTACC -0.0117687609436  
GAACTAGA -0.168782816996  
GAACTAGC -0.0345819688085  
GAACTATA 0.0221564491289  
GAACTATC -0.0957731581429  
GAACTCAA -0.0937020563493  
GAACTCAC -0.24513363382  
GAACTCCA -0.269222605393  
GAACTCCC -0.43848351036  
GAACTCGA -0.206039982427  
GAACTCGC -0.0264325636456  
GAACTCTA -0.110144303409  
GAACTCTC -0.33371238749  
GAACTGAA -0.0419675874221  
GAACTGAC -0.22896808891  
GAACTGCA -0.170704992082  
GAACTGCC -0.277607865511  
GAACTGGA 0.0477827133534  
GAACTGGC -0.165668031262  
GAACTGTA -0.0482780918516  
GAACTGTC -0.148316877923  
GAACTTAA -0.0471510550221  
GAACTTAC -0.0157522098056  
GAACTTCA -0.258383502266  
GAACTTCC -0.361156219315  
GAACTTGA 0.168828608223

GAACTTGC 0.011724560776  
GAACTTTA 0.0670693342482  
GAAGAAAA 0.113433282483  
GAAGAAAC -0.135454966086  
GAAGAACA -0.0684342678627  
GAAGAACC -0.22769614533  
GAAGAAGA 0.116897596303  
GAAGAAGC -0.181762385111  
GAAGAATA 0.096233659117  
GAAGAATC 0.437358860461  
GAAGACAA -0.106051707928  
GAAGACAC -0.177950376491  
GAAGACCA -0.268288110971  
GAAGACCC -0.340907267037  
GAAGACGA 0.0208147224497  
GAAGACGC -0.241313301739  
GAAGACTA -0.041535586812  
GAAGACTC -0.283378662986  
GAAGAGAA -0.0490824612924  
GAAGAGAC -0.203444568499  
GAAGAGCA -0.0962518992822  
GAAGAGCC -0.116240967191  
GAAGAGGA -0.258748748997  
GAAGAGGC -0.349962375861  
GAAGAGTA -0.0859258556382  
GAAGAGTC -0.123755846103  
GAAGATAA -0.181163481396  
GAAGATAC 0.200970051751  
GAAGATCA 0.264279614315  
GAAGATCC 0.363193910217  
GAAGATGA 0.0196656711808  
GAAGATGC 0.0444771282381  
GAAGATTA 0.3503740794  
GAAGATTC 0.454036043006  
GAAGCAAA -0.0815405502069  
GAAGCAAC -0.404504027802  
GAAGCACA -0.178726295371  
GAAGCACC -0.151043939923  
GAAGCAGA 0.12061049758  
GAAGCAGC -0.247860796719  
GAAGCATA 0.0265563527806  
GAAGCATC -0.10227394926  
GAAGCCAA -0.277945923298  
GAAGCCAC -0.27632318279  
GAAGCCCA -0.306825605531  
GAAGCCCC -0.415616110743  
GAAGCCGA -0.0751073334161  
GAAGCCGC -0.282537753192  
GAAGCCTA -0.29187249089  
GAAGCCTC -0.31303349732  
GAAGCGAA -0.0625641377478  
GAAGCGAC -0.230597940702  
GAAGCGCA -0.00953760452594  
GAAGCGCC -0.244243727168

GAAGCGGA -0.122233526611  
GAAGCGGC -0.34399552458  
GAAGCGTA -0.101836918674  
GAAGCGTC -0.153176089707  
GAAGCTAA -0.359146605729  
GAAGCTAC -0.376337080783  
GAAGCTCA -0.303707930522  
GAAGCTCC -0.265606369083  
GAAGCTGA -0.0627626636927  
GAAGCTGC -0.170221071633  
GAAGCTTA -0.0920246159954  
GAAGCTTC 0.0280802868806  
GAAGGAAA 0.0192708842725  
GAAGGAAC -0.206400409776  
GAAGGACA -0.0297359591298  
GAAGGACC -0.270883086055  
GAAGGAGA -0.0880526813506  
GAAGGAGC -0.227169381236  
GAAGGATA 0.160939399955  
GAAGGATC 0.225350695048  
GAAGGCAA -0.21708224786  
GAAGGCAC -0.380859068171  
GAAGGCCA -0.216663237447  
GAAGGCCC -0.387150216884  
GAAGGCCG 0.0252015273099  
GAAGGCCG -0.332363050987  
GAAGGCTA -0.126034677289  
GAAGGCTC -0.421525340882  
GAAGGGAA 0.0994996226735  
GAAGGGAC -0.351249268591  
GAAGGGCA -0.261343954147  
GAAGGGCC -0.105604143407  
GAAGGGGA -0.030971743093  
GAAGGGGC -0.48277933465  
GAAGGGTA -0.120144285216  
GAAGGGTC -0.310685980215  
GAAGGTAA -0.0243328469594  
GAAGGTAC -0.137402960322  
GAAGGTCA -0.24233766377  
GAAGGTCC -0.327812988366  
GAAGGTGA 0.0374989314383  
GAAGGTGC -0.235706394598  
GAAGGTTA -0.0518656329693  
GAAGTAAA 0.0799380647865  
GAAGTAAC -0.1047478022  
GAAGTACA -0.145527622201  
GAAGTACC -0.2636725049  
GAAGTAGA -0.115849466415  
GAAGTAGC -0.112623330594  
GAAGTATA 0.00135690459333  
GAAGTATC 0.142935578331  
GAAGTCAA -0.239868340598  
GAAGTCAC -0.294420424881  
GAAGTCCA -0.243721768573

GAAGTCCC -0.428644494934  
GAAGTCGA -0.132541947581  
GAAGTCGC -0.173148457577  
GAAGTCTA 0.0121420698817  
GAAGTCTC -0.200320351438  
GAAGTGAA 0.065688342591  
GAAGTGAC -0.0116162994951  
GAAGTGCA 0.0532915835946  
GAAGTGCC -0.160017741495  
GAAGTGGA 0.0662656021241  
GAAGTGGC -0.255836165621  
GAAGTGTA 0.0496653357956  
GAAGTGTC -0.0167537741875  
GAAGTTAA -0.0703996007026  
GAAGTTAC -0.0951611184659  
GAAGTTCA -0.241082490701  
GAAGTTCC -0.283598696604  
GAAGTTGA -0.0243480394996  
GAAGTTGC -0.0801311665886  
GAAGTTTA -0.0906379227043  
GAATAAAA 0.167283198178  
GAATAAAC -0.11139975037  
GAATAACA -0.159838105735  
GAATAACC 0.0901374422458  
GAATAAGA 0.0106566621718  
GAATAAGC -0.147960769719  
GAATAATA 0.208923162267  
GAATAATC 0.272991832296  
GAATACAA 0.0328949001117  
GAATACAC -0.0735407253856  
GAATACCA -0.0209451876119  
GAATACCC -0.0646086858208  
GAATACGA 0.13777727495  
GAATACGC 0.210210725313  
GAATACTA 0.154296169448  
GAATACTC 0.0117337161623  
GAATAGAA -0.0392918403247  
GAATAGAC -0.0257649452813  
GAATAGCA -0.073064823398  
GAATAGCC 0.145011402587  
GAATAGGA -0.0925488541696  
GAATAGGC -0.406645461111  
GAATAGTA -0.0102078056685  
GAATAGTC -0.242753173717  
GAATATAA 0.178562860381  
GAATATAC 0.241877185171  
GAATATCA 0.305157551294  
GAATATCC 0.445988535127  
GAATATGA 0.21780596023  
GAATATGC 0.207244434517  
GAATATTA 0.204464865733  
GAATATTC 0.264355354884  
GAATCAAA 0.326498674984  
GAATCAAC 0.298195275083



GAATCACA 0.358225002372  
GAATCACC 0.249841974263  
GAATCAGA 0.241504589989  
GAATCAGC 0.291510518783  
GAATCATA 0.293471157108  
GAATCATC 0.223171025452  
GAATCCAA 0.440028182452  
GAATCCAC 0.411756676861  
GAATCCCA 0.354540490904  
GAATCCCC 0.327149463513  
GAATCCGA 0.457428669445  
GAATCCGC 0.445723816267  
GAATCCTA 0.408606380882  
GAATCCTC 0.379807011525  
GAATCGAA 0.374156264734  
GAATCGAC 0.207261884776  
GAATCGCA 0.249376504454  
GAATCGCC 0.315142208852  
GAATCGGA 0.362316862317  
GAATCGGC 0.14323117012  
GAATCGTA 0.355174733963  
GAATCGTC 0.319425143311  
GAATCTAA 0.456307526113  
GAATCTAC 0.445758851996  
GAATCTCA 0.460765822646  
GAATCTCC 0.459058231786  
GAATCTGA 0.44403626198  
GAATCTGC 0.431356247673  
GAATCTTA 0.425134486106  
GAATGAAA 0.0676309918734  
GAATGAAC -0.0812566689  
GAATGACA -0.134999986217  
GAATGACC -0.00827208163325  
GAATGAGA -0.190703876657  
GAATGAGC -0.192154770645  
GAATGATA 0.146874885951  
GAATGATC 0.0665748393021  
GAATGCAA 0.167513243271  
GAATGCAC -0.241857807899  
GAATGCCA -0.210258030711  
GAATGCCC -0.339014894489  
GAATGCGA -0.112708241191  
GAATGCGC -0.105713878068  
GAATGCTA 0.0809583688372  
GAATGCTC -0.248108269035  
GAATGGAA -0.0736303069403  
GAATGGAC -0.346034844024  
GAATGGCA 0.0622869572199  
GAATGGCC -0.152409387776  
GAATGGGA -0.018437367254  
GAATGGGC -0.17405010296  
GAATGGTA 0.0184532525874  
GAATGGTC -0.223291653957  
GAATGTAA 0.265834705229

GAATGTAC -0.088296285266  
GAATGTCA -0.262014638382  
GAATGTCC -0.288109945176  
GAATGTGA 0.106566279571  
GAATGTGC 0.0254135105664  
GAATGTTA 0.181188075127  
GAATTTAA 0.0208280110655  
GAATTTAC -0.106120141733  
GAATTTACA 0.0374437056123  
GAATTTACC 0.125315304841  
GAATTTAGA 0.042812785237  
GAATTTAGC 0.0524780979326  
GAATTTATA 0.0813677196814  
GAATTTATC 0.10359992117  
GAATTTCAA 0.0167674561614  
GAATTTCAC 0.0470610132625  
GAATTTCCA -0.0197235803296  
GAATTTCCC 0.143540652394  
GAATTTCGA 0.0599428629732  
GAATTTCGC 0.188596600074  
GAATTTCTA 0.216408789736  
GAATTTCTC 0.13772588015  
GAATTTGAA 0.017611275187  
GAATTTGAC -0.0486167369501  
GAATTTGCA 0.142113187568  
GAATTTGCC 0.126008189602  
GAATTTGGA 0.020906841456  
GAATTTGGC -0.205570028532  
GAATTTGTA 0.129919175374  
GAATTTGTC 0.0597663779482  
GAATTTTAA 0.140212050525  
GAATTTTAC 0.159788471785  
GAATTTTCA 0.082674831938  
GAATTTTCC 0.294019109071  
GAATTTTGA 0.21962657752  
GAATTTTGC 0.248448172691  
GAATTTTTA 0.199813872689  
GACAAAAA 0.195601938026  
GACAAAAC 0.0450844142099  
GACAAACA 0.0782194550484  
GACAAACC 0.10916288189  
GACAAAGA 0.226867294877  
GACAAAGC -0.1979669166  
GACAAATA 0.123462259951  
GACAAATC 0.294476015584  
GACAACAA -0.108488865207  
GACAACAC 0.0420599663024  
GACAACCA -0.00993141902233  
GACAACCC -0.140237833307  
GACAACGA 0.0154017679278  
GACAACGC -0.142479410848  
GACAACTA -0.0586515990903  
GACAACTC -0.227522269919  
GACAAGAA 0.121083893811

GACAAGAC -0.228274983665  
GACAAGCA -0.0630796405918  
GACAAGCC -0.0500497044737  
GACAAGGA -0.0289796788259  
GACAAGGC -0.155239584109  
GACAAGTA 0.159086530335  
GACAAGTC -0.30871946698  
GACAATAA -0.0143843565469  
GACAATAC -0.0380735538626  
GACAATCA 0.0696619782049  
GACAATCC 0.379968122392  
GACAATGA -0.0368896907382  
GACAATGC 0.056537253507  
GACAATTA 0.175000620394  
GACACAAA 0.16372708797  
GACACAAC 0.0504974343628  
GACACACA -0.179576051369  
GACACACC -0.0609687379108  
GACACAGA 0.0717874791063  
GACACAGC -0.0966061584394  
GACACATA 0.0592865592866  
GACACATC -0.0543134091954  
GACACCAA -0.167202288433  
GACACCAC -0.133158158195  
GACACCCA -0.120801004358  
GACACCCC -0.0647169758993  
GACACCGA 0.0445390293875  
GACACCGC -0.0681973114332  
GACACCTA -0.102422920435  
GACACCTC -0.139987389641  
GACACGAA -0.031860312182  
GACACGAC -0.0926491145355  
GACACGCA -0.232110147982  
GACACGCC -0.1641414252  
GACACGGA -0.197853067432  
GACACGGC -0.248727049308  
GACACGTA -0.0102516003299  
GACACGTC -0.284548408702  
GACACTAA 0.0458543841389  
GACACTAC -0.200131510384  
GACACTCA -0.210231327503  
GACACTCC -0.140068080259  
GACACTGA 0.0209837937111  
GACACTGC -0.0614197607448  
GACACTTA 0.0366744154623  
GACAGAAA -0.0628752655051  
GACAGAAC -0.0611963523777  
GACAGACA -0.0559195559196  
GACAGACC -0.0532760264085  
GACAGAGA 0.213331824851  
GACAGAGC -0.230324666891  
GACAGATA 0.217981487456  
GACAGATC 0.126860725678  
GACAGCAA 0.129558476822

GACAGCAC -0.231119657059  
GACAGCCA -0.271659863489  
GACAGCCC -0.200936734316  
GACAGCGA -0.0639876499055  
GACAGCGC -0.134783619347  
GACAGCTA -0.0590300942315  
GACAGCTC -0.0359438199459  
GACAGGAA -0.0700500790376  
GACAGGAC -0.21226339031  
GACAGGCA 0.0644005648382  
GACAGGCC 0.0968584629534  
GACAGGGA -0.122636965156  
GACAGGGC -0.244873315852  
GACAGGTA 0.0510346488763  
GACAGGTC -0.348147548327  
GACAGTAA 0.104023269563  
GACAGTAC -0.254051825419  
GACAGTCA -0.205348164127  
GACAGTCC -0.0808262539533  
GACAGTGA 0.0337706852858  
GACAGTGC 0.100899250381  
GACAGTTA -0.0220079147623  
GACATAAA -0.145078238228  
GACATAAC -0.121548433246  
GACATACA -0.196211099807  
GACATACC 0.0433348563387  
GACATAGA 0.0537382393086  
GACATAGC -0.140527335942  
GACATATA -0.0582009153084  
GACATATC 0.143823857872  
GACATCAA -0.0749523628312  
GACATCAC -0.146769850478  
GACATCCA 0.0315051495223  
GACATCCC 0.025073282649  
GACATCGA -0.0640394268424  
GACATCGC -0.0659576413425  
GACATCTA 0.173312263235  
GACATCTC 0.18174164532  
GACATGAA -0.049637792062  
GACATGAC -0.214557812803  
GACATGCA -0.0588753530945  
GACATGCC -0.0571038590396  
GACATGGA 0.0313270512325  
GACATGGC -0.218295610851  
GACATGTA 0.162069783282  
GACATGTC -0.0994765696708  
GACATTAA -0.00997887839993  
GACATTAC 0.0709320233863  
GACATTCA -0.131256342708  
GACATTCC -0.149253772495  
GACATTGA -0.139394064701  
GACATTGC 4.82576240153E-5  
GACATTTA 0.168180577271  
GACCAAAA -0.103005914409

GACCAAAC -0.148354496698  
GACCAACA -0.0255241800115  
GACCAACC -0.131542374984  
GACCAAGA -0.0608824843056  
GACCAAGC -0.23065130689  
GACCAATA 0.118767472245  
GACCAATC 0.0641454126303  
GACCACAA -0.138981371065  
GACCACAC -0.236897820783  
GACCACCA -0.240769281289  
GACCACCC -0.235522477788  
GACCACGA -0.254787798591  
GACCACGC -0.277831531882  
GACCACTA 0.0695802281702  
GACCACTC -0.258601264705  
GACCAGAA -0.0358100973005  
GACCAGAC -0.363685636461  
GACCAGCA -0.157215708654  
GACCAGCC -0.0248941831768  
GACCAGGA -0.137743394442  
GACCAGGC -0.279975964653  
GACCAGTA -0.0935263611909  
GACCAGTC -0.384049160939  
GACCATAA -0.236473280128  
GACCATAC -0.101790042269  
GACCATCA -0.0735294523173  
GACCATCC -0.159378124156  
GACCATGA -0.225123421568  
GACCATGC 0.00771005014489  
GACCATTA 0.131482522281  
GACCCAAA -0.150082589477  
GACCCAAC -0.195175224148  
GACCCACA -0.284791431644  
GACCCACC 0.0218790829398  
GACCCAGA -0.0105260468749  
GACCCAGC -0.353327088704  
GACCCATA -0.147784631177  
GACCCATC -0.185462685004  
GACCCCAA -0.166066982638  
GACCCCAC -0.283897334269  
GACCCCCA -0.364587847193  
GACCCCCC -0.357033364627  
GACCCCGA -0.0573226371142  
GACCCCGC -0.150336770361  
GACCCCTA -0.20614504268  
GACCCCTC -0.373864153127  
GACCCGAA -0.0841038186204  
GACCCGAC -0.268631701025  
GACCCGCA -0.203643208195  
GACCCGCC -0.337024082205  
GACCCGGA -0.123925761726  
GACCCGGC -0.263477807825  
GACCCGTA -0.0584814914958  
GACCCGTC -0.234671881934

GACCCTAA -0.266853994072  
GACCCTAC -0.0395501790205  
GACCCTCA -0.384765598084  
GACCCTCC -0.140514503362  
GACCCTGA -0.262983084297  
GACCCTGC -0.301255532354  
GACCCTTA -0.0718336379702  
GACCGAAA -0.0736241738426  
GACCGAAC -0.119467952801  
GACCGACA -0.0281519382787  
GACCGACC -0.190887891042  
GACCGAGA 0.0403748556816  
GACCGAGC -0.390451660203  
GACCGATA 0.138845457027  
GACCGATC -0.236112144895  
GACCGCAA -0.27677176097  
GACCGCAC -0.188085392714  
GACCGCCA -0.196960674854  
GACCGCCC -0.289835499579  
GACCGCGA -0.194460296587  
GACCGCGC -0.0884717500806  
GACCGCTA -0.141012581379  
GACCGCTC -0.140275192933  
GACCGGAA -0.110016515436  
GACCGGAC -0.164429912189  
GACCGGCA -0.180451462524  
GACCGGCC -0.259100375209  
GACCGGGA 0.0854105384554  
GACCGGGC -0.359601689328  
GACCGGTA 0.065472288928  
GACCGGTC -0.194956359738  
GACCGTAA -0.023077988044  
GACCGTAC -0.280688300525  
GACCGTCA -0.358004290753  
GACCGTCC -0.0307167808434  
GACCGTGA 0.0184660189923  
GACCGTGC -0.164214652542  
GACCGTTA -0.0710286198899  
GACCTAAA -0.160405448996  
GACCTAAC -0.111299949  
GACCTACA 0.0328277482975  
GACCTACC 0.000293652960104  
GACCTAGA 0.0605556082714  
GACCTAGC -0.305673389397  
GACCTATA 0.0338963380364  
GACCTATC -0.358435254327  
GACCTCAA -0.256458810526  
GACCTCAC -0.328235702726  
GACCTCCA -0.33065967657  
GACCTCCC -0.329386224158  
GACCTCGA -0.181962675313  
GACCTCGC -0.284461204698  
GACCTCTA -0.148162394223  
GACCTCTC -0.169936181064

GACCTGAA -0.287407977024  
GACCTGAC -0.30396378845  
GACCTGCA -0.0982709799802  
GACCTGCC -0.196727161278  
GACCTGGA -0.035212160817  
GACCTGGC -0.480024239343  
GACCTGTA -0.0210610059095  
GACCTTAA -0.0563185718634  
GACCTTAC -0.293702492532  
GACCTTCA -0.131321152165  
GACCTTCC -0.214040615195  
GACCTTGA -0.25759075412  
GACCTTGC -0.0556725035218  
GACCTTTA -0.0353917635218  
GACGAAAA 0.0383041443648  
GACGAAAC -0.0222597215674  
GACGAACA -0.14055660723  
GACGAACC -0.237779217993  
GACGAAGA -0.0124307281592  
GACGAAGC -0.215130491128  
GACGAATA 0.183788471667  
GACGAATC 0.236931308074  
GACGACAA -0.0683336504076  
GACGACAC -0.210439452066  
GACGACCA -0.285686250192  
GACGACCC -0.248948876199  
GACGACGA 0.0243432625563  
GACGACGC -0.203575175884  
GACGACTA -0.175775052074  
GACGACTC -0.0644764228315  
GACGAGAA 0.0363587130264  
GACGAGAC -0.157126216823  
GACGAGCA -0.28850601327  
GACGAGCC -0.287295010792  
GACGAGGA -0.179768728753  
GACGAGGC -0.192008810174  
GACGAGTA 0.183658865477  
GACGAGTC -0.328136498565  
GACGATAA 0.00742753773057  
GACGATAC -0.00112042605527  
GACGATCA -0.0159098705868  
GACGATCC 0.189149204301  
GACGATGA -0.0175244337715  
GACGATGC 0.0714225235944  
GACGATTA 0.270378391936  
GACGCAA 0.0239111552302  
GACGCAAC -0.0418114939646  
GACGCACA -0.193906296297  
GACGCACC -0.33778037523  
GACGCAGA 0.0781759721154  
GACGCAGC -0.276913300483  
GACGCATA -0.00395392801617  
GACGCATC -0.0500120970744  
GACGCCAA -0.333726132295

GACGCCAC 0.0105196398781  
GACGCCCA -0.306693181411  
GACGCCCC -0.300360269861  
GACGCCGA -0.0177576731261  
GACGCCGC 0.00375958508078  
GACGCCTA -0.202981090717  
GACGCCTC -0.352851446405  
GACGCGAA 0.0339928337137  
GACGCGAC -0.1208881111082  
GACGCGCA -0.175918182681  
GACGCGCC -0.296698283537  
GACGCGGA -0.040546911834  
GACGCGGC -0.252041946551  
GACGCGTA 0.065134432395  
GACGCGTC -0.184151198203  
GACGCTAA -0.169775114414  
GACGCTAC -0.259704824507  
GACGCTCA -0.276522261638  
GACGCTCC -0.121276185833  
GACGCTGA 0.152295340869  
GACGCTGC -0.131938067861  
GACGCTTA 0.056537253507  
GACGGAAA 0.129447629448  
GACGGAAC -0.032353289929  
GACGGACA -0.338465142558  
GACGGACC -0.271816066126  
GACGGAGA 0.101316759487  
GACGGAGC -0.323370346427  
GACGGATA 0.172582352211  
GACGGATC 0.0308686671095  
GACGGCAA -0.0486950568499  
GACGGCAC -0.234010650081  
GACGGCCA -0.230793406612  
GACGGCCC -0.359496173516  
GACGGCGA -0.0602912347847  
GACGGCGC -0.199050621365  
GACGGCTA -0.102902861847  
GACGGCTC -0.0313407280578  
GACGGGAA -0.0374626021977  
GACGGGAC -0.0546498258848  
GACGGGCA -0.211711724861  
GACGGGCC -0.399137570051  
GACGGGGA -0.0341965169397  
GACGGGGC -0.272083447027  
GACGGGTA -0.105477657829  
GACGGTAA -0.0871676743615  
GACGGTAC -0.130331328872  
GACGGTCA -0.251397728318  
GACGGTCC -0.419581822559  
GACGGTGA -0.014402436906  
GACGGTGC -0.131192248132  
GACGGTTA 0.0103243877019  
GACGTAAA -0.0872096069267  
GACGTAAC 0.0606227600855



GACGTACA -0.184360291502  
GACGTACC -0.156756421392  
GACGTAGA 0.105190659008  
GACGTAGC -0.0877143186531  
GACGTATA 0.105512288052  
GACGTATC 0.213647531829  
GACGTCAA -0.0499358440053  
GACGTCC -0.225532526716  
GACGTCCA -0.218045238988  
GACGTCCC -0.232735335706  
GACGTCCG -0.137739393282  
GACGTCCG -0.226462196341  
GACGTCTA 0.0291848322151  
GACGTCTC -0.121560600422  
GACGTGAA -0.0858641010156  
GACGTGAC -0.0523789827798  
GACGTGCA -0.218347599553  
GACGTGCC -0.0930926175398  
GACGTGGA 0.0517849974088  
GACGTGGC -0.226845957469  
GACGTGTA -0.0972915461073  
GACGTTAA -0.0473077231885  
GACGTTAC -0.0311813190601  
GACGTTCA -0.27306296486  
GACGTTCC -0.207230231  
GACGTTGA -0.00903410874214  
GACGTTGC -0.0114603329854  
GACGTTTA 0.0901521356067  
GACTAAAA 0.107275753086  
GACTAAAC -0.0275534112392  
GACTAACA -0.0329815012422  
GACTAACC -0.13330355592  
GACTAAGA -0.0163950099034  
GACTAAGC -0.063417635236  
GACTAATA 0.0883955580925  
GACTAATC -0.0866224351073  
GACTACAA 0.0310409261111  
GACTACAC 0.00482228278561  
GACTACCA -0.15966438673  
GACTACCC -0.0850094076192  
GACTACGA -0.0268436480558  
GACTACGC 0.0464683255111  
GACTACTA 0.0443156655278  
GACTACTC -0.300519270045  
GACTAGAA 0.168894790107  
GACTAGAC -0.127641730473  
GACTAGCA -0.217168355991  
GACTAGCC -0.128691320039  
GACTAGGA -0.109698719698  
GACTAGGC -0.0658373117751  
GACTAGTA -0.0460814562981  
GACTAGTC -0.264303960715  
GACTATAA -0.0112026627178  
GACTATAC -0.0761946818683

GACTATCA -0.123463989038  
GACTATCC 0.0955983531741  
GACTATGA -0.124329696809  
GACTATGC 0.0905082370459  
GACTATTA 0.108475726809  
GACTCAAA 0.00666189791464  
GACTCAAC -0.123124091858  
GACTCACA -0.162965168697  
GACTCACC -0.0909406714474  
GACTCAGA 0.0937866240897  
GACTCAGC -0.249010097502  
GACTCATA -0.0904582268219  
GACTCATC -0.198406002101  
GACTCCAA -0.0793120944636  
GACTCCAC -0.200445216337  
GACTCCCA -0.242938360132  
GACTCCCC -0.20579771267  
GACTCCGA -0.0493251161572  
GACTCCGC -0.153423331762  
GACTCCTA -0.195334187928  
GACTCCTC -0.297364569611  
GACTCGAA -0.00542250899615  
GACTCGAC -0.159729652016  
GACTCGCA -0.269124742626  
GACTCGCC -0.115592563237  
GACTCGGA -0.177649300128  
GACTCGGC -0.284189635069  
GACTCGTA 0.0501122912376  
GACTCTAA -0.0851001640678  
GACTCTAC -0.0693189200236  
GACTCTCA -0.173582682049  
GACTCTCC -0.145930686163  
GACTCTGA 0.0276601521276  
GACTCTGC 0.136962694248  
GACTCTTA -0.0799111684574  
GACTGAAA 0.242735560535  
GACTGAAC -0.0709013671233  
GACTGACA -0.36623860595  
GACTGACC -0.271087783614  
GACTGAGA 0.0102740764635  
GACTGAGC -0.0862799103413  
GACTGATA 0.0965910814396  
GACTGATC -0.18169949639  
GACTGCAA -0.196801143106  
GACTGCAC -0.251604961334  
GACTGCCA -0.292482322293  
GACTGCCC -0.184596128769  
GACTGCGA -0.0544963165047  
GACTGCGC -0.205669828824  
GACTGCTA -0.0854197166323  
GACTGCTC 0.134627370216  
GACTGGAA 0.250190962312  
GACTGGAC -0.0471255274647  
GACTGGCA -0.155322285222

GACTGGCC -0.0594231532716  
GACTGGGA -0.0185950202102  
GACTGGGC -0.234893658079  
GACTGGTA -0.0953358685576  
GACTGTAA -0.0205701569338  
GACTGTAC -0.260872960385  
GACTGTCA -0.207856806172  
GACTGTCC 0.0184091454285  
GACTGTGA -0.0603642951088  
GACTGTGC -0.0685549608772  
GACTGTTA 0.0551396684744  
GACTTAAA 0.013609299895  
GACTTAAC 0.0749716658808  
GACTTACA -0.231258391713  
GACTTACC -0.117789833495  
GACTTAGA -0.0310350057217  
GACTTAGC -0.171273665666  
GACTTATA 0.0266384421753  
GACTTATC 0.0442756727955  
GACTTCAA 0.0327286999293  
GACTTCAC -0.227769586493  
GACTTCCA -0.228377756276  
GACTTCCC -0.262685159914  
GACTTCGA -0.0692248722552  
GACTTCGC -0.0806449729449  
GACTTCTA -0.0380802691263  
GACTTCTC -0.143496119864  
GACTTGAA 0.143047232542  
GACTTGAC -0.130359747138  
GACTTGCA -0.0801818556045  
GACTTGCC -0.316854082417  
GACTTGGA 0.092408925352  
GACTTGGC -0.283452772342  
GACTTGTA 0.0294468021741  
GACTTTAA 0.0215987337199  
GACTTTAC 0.0972280820766  
GACTTTCA -0.256508918626  
GACTTTCC -0.153817626347  
GACTTTGA 0.0102678436012  
GACTTTGC 0.144446098992  
GACTTTTA 0.00732274974699  
GAGAAAAA -0.0096529035923  
GAGAAAAC -0.0846872751185  
GAGAAACA -0.017568228433  
GAGAAACC -0.0468230622687  
GAGAAAGA -0.0443851594491  
GAGAAAGC -0.105074408902  
GAGAAATA 0.243410076743  
GAGAAATC 0.449167177207  
GAGAACAA 0.00874068451056  
GAGAACAC -0.135615278498  
GAGAACCA -0.0930041361873  
GAGAACCC -0.143067164598  
GAGAACGA -0.232594712698

GAGAACGC -0.200830273181  
GAGAACTA -0.0844229958068  
GAGAACTC -0.308367573693  
GAGAAGAA -0.0820532545847  
GAGAAGAC -0.30337702794  
GAGAAGCA -0.0962616461661  
GAGAAGCC -0.333496038886  
GAGAAGGA -0.16214458686  
GAGAAGGC -0.343751427829  
GAGAAGTA 0.181634802847  
GAGAATAA 0.140267731364  
GAGAATAC 0.131205156091  
GAGAATCA 0.42298890516  
GAGAATCC 0.484295234411  
GAGAATGA -0.153603691048  
GAGAATGC -0.212280942449  
GAGAATTA 0.050379060476  
GAGACAAA -0.0878003534987  
GAGACAAC -0.3031918387  
GAGACACA -0.0758568485841  
GAGACACC -0.0247700983028  
GAGACAGA 0.0618663695301  
GAGACAGC -0.23956084853  
GAGACATA -0.00856988533098  
GAGACATC -0.00506923206061  
GAGACCAA 0.0437676547229  
GAGACCAC -0.173920001985  
GAGACCCA -0.219444553888  
GAGACCCC -0.349721512568  
GAGACCGA -0.174326945956  
GAGACCGC -0.144919255384  
GAGACCTA -0.229742511133  
GAGACCTC -0.311678672009  
GAGACGAA -0.197236350604  
GAGACGAC -0.254863850775  
GAGACGCA -0.435890945749  
GAGACGCC -0.355362345204  
GAGACGGA -0.195805390864  
GAGACGGC -0.461946555364  
GAGACGTA 0.0873476782568  
GAGACTAA -0.0205212408974  
GAGACTAC -0.0357989949162  
GAGACTCA -0.173188341272  
GAGACTCC -0.385055592606  
GAGACTGA -0.0213505516536  
GAGACTGC -0.219692625134  
GAGACTTA -0.22577041237  
GAGAGAAA -0.0154657759536  
GAGAGAAC -0.159468838517  
GAGAGACA -0.267837261663  
GAGAGACC -0.218852890433  
GAGAGAGA 0.00943318197232  
GAGAGAGC -0.194674266293  
GAGAGATA 0.258331334089

GAGAGATC 0.259055821688  
GAGAGCAA -0.0278184480234  
GAGAGCAC -0.275978531623  
GAGAGCCA -0.231240954389  
GAGAGCCC -0.256858756106  
GAGAGCGA -0.151350881981  
GAGAGCGC -0.252155603001  
GAGAGCTA -0.0870994961904  
GAGAGCTC -0.262214955194  
GAGAGGAA -0.117837782519  
GAGAGGAC -0.368811054125  
GAGAGGCA -0.206629995287  
GAGAGGCC -0.217234031719  
GAGAGGGA -0.181513433724  
GAGAGGGC -0.310498673016  
GAGAGGTA 0.00310930571248  
GAGAGTAA 0.0421092968767  
GAGAGTAC -0.0805711680191  
GAGAGTCA -0.299113364182  
GAGAGTCC -0.248473597019  
GAGAGTGA -0.240617324534  
GAGAGTGC -0.256252690879  
GAGAGTTA -0.130929239287  
GAGATAAA -0.0201204585365  
GAGATAAC -0.11953651712  
GAGATACA -0.00819909053086  
GAGATACC 0.314034420095  
GAGATAGA -0.0838482600028  
GAGATAGC 0.0662781106983  
GAGATATA 0.324038889659  
GAGATATC 0.476435552506  
GAGATCAA 0.194151451727  
GAGATCAC 0.202076596863  
GAGATCCA 0.348366824084  
GAGATCCC 0.399635172362  
GAGATCGA 0.118837543703  
GAGATCGC 0.42357922661  
GAGATCTA 0.40901921205  
GAGATCTC 0.463577628384  
GAGATGAA 0.0325792641184  
GAGATGAC -0.297373946974  
GAGATGCA -0.106915871874  
GAGATGCC -0.146146804422  
GAGATGGA -0.0336128067694  
GAGATGGC -0.00602043839943  
GAGATGTA 0.200170731612  
GAGATTAA 0.085748282718  
GAGATTAC 0.467830089042  
GAGATTCA 0.217874791063  
GAGATTCC 0.473626854886  
GAGATTGA 0.138331168634  
GAGATTGC 0.474023926483  
GAGATTTA 0.325314602001  
GAGCAAAA 0.083960935162

GAGCAAAC -0.170636200495  
GAGCAACA -0.202047647012  
GAGCAACC -0.164243110597  
GAGCAAGA -0.00527600305364  
GAGCAAGC -0.226564358531  
GAGCAATA -0.0316379933286  
GAGCAATC 0.353327156357  
GAGCACAA 0.058459285732  
GAGCACAC -0.3051776102  
GAGCACCA -0.244106191436  
GAGCACCC -0.168392806841  
GAGCACGA -0.178336380004  
GAGCACGC -0.170039159251  
GAGCACTA 0.00809533262202  
GAGCACTC -0.173554767084  
GAGCAGAA -0.209034629804  
GAGCAGAC -0.213285257868  
GAGCAGCA -0.312164259117  
GAGCAGCC -0.422066081101  
GAGCAGGA 0.038019908065  
GAGCAGGC -0.298671995028  
GAGCAGTA 0.11310675363  
GAGCATAA -0.0173425550581  
GAGCATAC -0.363408055004  
GAGCATCA -0.00455093155542  
GAGCATCC -0.210300624406  
GAGCATGA -0.322725856827  
GAGCATGC -0.233537657713  
GAGCATT A -0.105399881754  
GAGCCAAA -0.121827889035  
GAGCCAAC -0.178832150743  
GAGCCACA -0.207838175338  
GAGCCACC -0.254254154917  
GAGCCAGA -0.0173554298025  
GAGCCAGC -0.285828488572  
GAGCCATA -0.0797329826042  
GAGCCATC -0.163944233542  
GAGCCCAA -0.184615289184  
GAGCCCAC -0.329952505782  
GAGCCCCA -0.325640621603  
GAGCCCCC -0.429518392677  
GAGCCCGA -0.0315924141424  
GAGCCCGC -0.400643649081  
GAGCCCTA -0.295654806633  
GAGCCCTC -0.435449269611  
GAGCCGAA -0.213921719423  
GAGCCGAC -0.197015554839  
GAGCCGCA -0.402673391486  
GAGCCGCC -0.41586634902  
GAGCCGGA -0.176490289966  
GAGCCGGC -0.339909977701  
GAGCCGTA -0.0472193957042  
GAGCCTAA -0.0678923332229  
GAGCCTAC -0.125868282352

GAGCCTCA -0.179397227718  
GAGCCTCC -0.289403473376  
GAGCCTGA -0.242094580496  
GAGCCTGC -0.359816219617  
GAGCCTTA -0.327581527489  
GAGCGAAA -0.00897831280606  
GAGCGAAC -0.186281108106  
GAGCGACA -0.239007713245  
GAGCGACC -0.207973343878  
GAGCGAGA -0.107891957769  
GAGCGAGC -0.19475802561  
GAGCGATA 0.121037014976  
GAGCGATC 0.32400385393  
GAGCGCAA -0.0769988005129  
GAGCGCAC -0.11497644694  
GAGCGCCA -0.289610328961  
GAGCGCCC -0.153758984921  
GAGCGCGA 0.0365999284687  
GAGCGCGC 0.0661438070699  
GAGCGCTA -0.00754398590466  
GAGCGCTC -0.287779073068  
GAGCGGAA -0.12887395375  
GAGCGGAC -0.402005369144  
GAGCGGCA -0.239357781965  
GAGCGGCC -0.174101051822  
GAGCGGGA -0.0556994005701  
GAGCGGGC -0.317437980475  
GAGCGGTA 0.104563240927  
GAGCGTAA -0.0400539880278  
GAGCGTAC 0.00353383686717  
GAGCGTCA -0.180526955616  
GAGCGTCC -0.253689120213  
GAGCGTGA -0.0840456048408  
GAGCGTGC -0.205588772835  
GAGCGTTA 0.0251147785085  
GAGCTAAA -0.195589731315  
GAGCTAAC -0.264615947602  
GAGCTACA -0.209879606426  
GAGCTACC -0.369669833552  
GAGCTAGA -0.163734418555  
GAGCTAGC -0.218719576364  
GAGCTATA -0.0977354765234  
GAGCTATC -0.0922114546705  
GAGCTCAA -0.230079452701  
GAGCTCAC -0.174560424134  
GAGCTCCA -0.224649547203  
GAGCTCCC -0.210506151199  
GAGCTCGA -0.226439284375  
GAGCTCGC -0.331879198059  
GAGCTCTA -0.19584073548  
GAGCTGAA -0.343181761802  
GAGCTGAC -0.376793859468  
GAGCTGCA -0.104282321411  
GAGCTGCC -0.219839241857

GAGCTGGA -0.168119866498  
GAGCTGGC -0.380051538578  
GAGCTGTA 0.0909372906172  
GAGCTTAA 0.0266702189003  
GAGCTTAC -0.183624130709  
GAGCTTCA -0.321816005896  
GAGCTTCC -0.22015051896  
GAGCTTGA -0.162896239499  
GAGCTTGC -0.214344787661  
GAGCTTTA -0.197036424155  
GAGGAAAA -0.0719245416215  
GAGGAAAC -0.340915425034  
GAGGAACA -0.222325631417  
GAGGAACC -0.181050098012  
GAGGAAGA -0.126871083098  
GAGGAAGC -0.246033960954  
GAGGAATA 0.195949392919  
GAGGAATC 0.420106858974  
GAGGACAA -0.0850918917428  
GAGGACAC -0.183827361445  
GAGGACCA -0.333140966058  
GAGGACCC -0.410895045652  
GAGGACGA -0.277542839715  
GAGGACGC -0.32189643825  
GAGGACTA -0.264793441255  
GAGGACTC -0.302553055425  
GAGGAGAA -0.170009968605  
GAGGAGAC -0.231476900399  
GAGGAGCA -0.326713163251  
GAGGAGCC -0.285448311408  
GAGGAGGA -0.102286908659  
GAGGAGGC -0.273932759353  
GAGGAGTA -0.0858061918668  
GAGGATAA 0.18753092998  
GAGGATAC 0.241074407741  
GAGGATCA 0.20677564617  
GAGGATCC 0.342691176025  
GAGGATGA -0.247280174422  
GAGGATGC -0.0159637591358  
GAGGATTA 0.183595441171  
GAGGCAAA -0.0203769260527  
GAGGCAAC -0.291211891946  
GAGGCACA -0.17831868044  
GAGGCACC -0.304692129802  
GAGGCAGA 0.0123896246838  
GAGGCAGC -0.10860609971  
GAGGCATA -0.153716341978  
GAGGCATC -0.142479410848  
GAGGCCAA -0.297420970522  
GAGGCCAC -0.339410232653  
GAGGCCCA -0.396249996555  
GAGGCCCC -0.378918395247  
GAGGCCGA -0.133307015713  
GAGGCCGC -0.244443893175



GAGGCCTA -0.313286036762  
GAGGCCTC -0.169612763295  
GAGGCGAA 0.0697746264348  
GAGGCGAC -0.17822987979  
GAGGCGCA -0.112579789602  
GAGGCGCC -0.18025953403  
GAGGCGGA -0.0673327984428  
GAGGCGGC -0.327588535766  
GAGGCGTA -0.0628830169954  
GAGGCTAA -0.105186453671  
GAGGCTAC -0.130466848079  
GAGGCTCA -0.359543438653  
GAGGCTCC -0.360730183881  
GAGGCTGA -0.342147257018  
GAGGCTGC -0.29656721621  
GAGGCTTA -0.131623576114  
GAGGGA AA 0.101308000555  
GAGGGAAC -0.404868215736  
GAGGGA CA -0.225448686673  
GAGGGA CC -0.271104267005  
GAGGGA GA -0.0806912359495  
GAGGGA GC -0.141887011075  
GAGGGA TA 0.144754947785  
GAGGGA TC 0.216203807113  
GAGGGA CA 0.0235935677594  
GAGGGA CC -0.215353826893  
GAGGGA CCA -0.42486326376  
GAGGGA CCC -0.230186737888  
GAGGGA CGA -0.0829115536079  
GAGGGA CGC -0.26955250803  
GAGGGA CTA -0.310662266246  
GAGGGA GAA -0.0762222608207  
GAGGGA GAC -0.415636037892  
GAGGGA GCA -0.244291314164  
GAGGGA GCC -0.268509052642  
GAGGGA GGA -0.134974785899  
GAGGGA GGC -0.129918318085  
GAGGGA GTA 0.00690911296972  
GAGGGA TAA 0.127646930677  
GAGGGA TAC -0.2397021974  
GAGGGA TCA -0.349769669979  
GAGGGA TCC -0.427770815675  
GAGGGA TGA -0.199584783672  
GAGGGA TGC -0.238917226734  
GAGGGA TTA -0.189975716581  
GAGGTA AA 0.0403441943569  
GAGGTA AC -0.0731867355474  
GAGGTA CA -0.181917751843  
GAGGTA CC -0.224416573387  
GAGGTA GA -0.103953777238  
GAGGTA GC -0.206622165976  
GAGGTA TA -0.182393228266  
GAGGTA TC 0.105865564988  
GAGGTA CA -0.0646206372075

GAGGTCAC -0.385804689416  
GAGGTCCA -0.392401679083  
GAGGTCCC -0.340718254657  
GAGGTCGA -0.307761512901  
GAGGTCGC -0.27536333744  
GAGGTCTA -0.195061299545  
GAGGTGAA -0.227394155935  
GAGGTGAC -0.254575317438  
GAGGTGCA -0.122546708338  
GAGGTGCC -0.469340629969  
GAGGTGGA 0.0439213318001  
GAGGTGGC -0.192465282692  
GAGGTGTA -0.00110969016197  
GAGGTTAA -0.0358940207425  
GAGGTTAC -0.0708984474793  
GAGGTTCA -0.320478135438  
GAGGTTCC -0.314027457368  
GAGGTTGA -0.123780297829  
GAGGTTGC -0.0898934873585  
GAGGTTTA -0.171469252697  
GAGTAAAA 0.0658165052104  
GAGTAAAC -0.0203234548908  
GAGTAACA -0.0650471062144  
GAGTAACC 0.0988730173792  
GAGTAAGA 0.178502193654  
GAGTAAGC -0.140485899164  
GAGTAATA 0.240788157924  
GAGTAATC 0.391310409261  
GAGTACAA -0.0114094811065  
GAGTACAC -0.0823776097203  
GAGTACCA -0.277540720159  
GAGTACCC -0.203117142652  
GAGTACGA -0.0219765383139  
GAGTACGC -0.13902728126  
GAGTACTA -0.0117238450572  
GAGTACTC -0.274112381598  
GAGTAGAA 0.106088031659  
GAGTAGAC 0.0272453887871  
GAGTAGCA -0.265950616311  
GAGTAGCC -0.300608272684  
GAGTAGGA -0.00932023386349  
GAGTAGGC -0.15598005893  
GAGTAGTA -0.0528181073636  
GAGTATAA 0.227439545119  
GAGTATAC 0.103649241244  
GAGTATCA 0.259017971139  
GAGTATCC 0.316301832807  
GAGTATGA 0.00100237979026  
GAGTATGC -0.0711845726006  
GAGTATTA 0.17118384269  
GAGTCAAA 0.070432764246  
GAGTCAAC -0.195318371463  
GAGTCACA -0.27946052773  
GAGTCACC -0.0659087757202

GAGTCAGA 0.0987480457602  
GAGTCAGC -0.245978180856  
GAGTCATA 0.0648533243798  
GAGTCATC -0.234927081707  
GAGTCCAA -0.112622189133  
GAGTCCAC -0.342346211088  
GAGTCCCA -0.219063237593  
GAGTCCCC -0.367903776659  
GAGTCCGA -0.0323806372448  
GAGTCCGC -0.184584857936  
GAGTCCTA -0.148004553515  
GAGTCGAA -0.0361752937511  
GAGTCGAC -0.0540983922954  
GAGTCGCA -0.17872618344  
GAGTCGCC -0.357570073174  
GAGTCGGA -0.0316772960766  
GAGTCGGC -0.213273783551  
GAGTCGTA 0.0277619217013  
GAGTCTAA -0.0258366605111  
GAGTCTAC -0.208107462724  
GAGTCTCA -0.151161772369  
GAGTCTCC -0.346874977202  
GAGTCTGA -0.0117284910173  
GAGTCTGC -0.207951867014  
GAGTCTTA -0.225549058038  
GAGTGAAA 0.0286964519025  
GAGTG AAC -0.356513600306  
GAGTGACA -0.259501964968  
GAGTGACC -0.207848440485  
GAGTGAGA 0.159706721751  
GAGTGAGC -0.21598619351  
GAGTGATA 0.121906089648  
GAGTGATC -0.0765379704774  
GAGTGCAA 0.216269988997  
GAGTGCAC -0.291545024742  
GAGTGCCA -0.378931356742  
GAGTGCCC -0.309414858147  
GAGTGCGA -0.138844168222  
GAGTGCGC -0.124070686914  
GAGTGCTA -0.157931445308  
GAGTG GAA 0.0588481043026  
GAGTG GAC -0.296266092824  
GAGTG GCA -0.162991544186  
GAGTG GCC -0.17548336162  
GAGTG GGA -0.236208469246  
GAGTG GGC -0.207849411998  
GAGTG GTA 0.111766165704  
GAGTG TAA 0.206734282492  
GAGTG TAC -0.220826480293  
GAGTG TCA -0.221550818506  
GAGTG TCC -0.298839405092  
GAGTG TGA 0.0814398224856  
GAGTG TGC 0.0644619946894  
GAGTG TTA -0.184092832938

GAGTTAAA -0.16798022479  
GAGTTAAC -0.138915767275  
GAGTTACA -0.0703378758129  
GAGTTACC -0.164463361433  
GAGTTAGA 0.0269213082925  
GAGTTAGC 0.054214598815  
GAGTTATA 0.0441860593376  
GAGTTATC -0.0472635169605  
GAGTTCAA 0.0504788535092  
GAGTTCAC -0.204122620909  
GAGTTCCA -0.243590005531  
GAGTTCCC -0.193769220222  
GAGTTCGA -0.0503762691328  
GAGTTCGC -0.168620104303  
GAGTTCTA -0.135928982684  
GAGTTGAA -0.13601660918  
GAGTTGAC -0.204752787065  
GAGTTGCA -0.217627857866  
GAGTTGCC -0.130489390863  
GAGTTGGA 0.0180213011438  
GAGTTGGC -0.186898765064  
GAGTTGTA -0.00918776427804  
GAGTTTAA 0.164242755152  
GAGTTTAC -0.0324292168785  
GAGTTTCA -0.211489462845  
GAGTTTCC -0.156615366653  
GAGTTTGA -0.10843339197  
GAGTTTGC -0.0687004348378  
GAGTTTTA -0.0457082426779  
GATAAAAA 0.149003306497  
GATAAAAC 0.0697495675277  
GATAAACA -0.0208128238431  
GATAAACC -0.0375209920664  
GATAAAGA 0.182646365408  
GATAAAGC -0.186611191957  
GATAAATA 0.116302252666  
GATAAATC 0.264754647671  
GATAACAA 0.133462040977  
GATAACAC -0.0321381988049  
GATAACCA -0.0835615229555  
GATAACCC -0.0766834091636  
GATAACGA 0.157003196482  
GATAACGC 0.157296414872  
GATAACTA 0.0722140873656  
GATAAGAA 0.182360045996  
GATAAGAC -0.103836145816  
GATAAGCA -0.0713316119728  
GATAAGCC -0.0622040773556  
GATAAGGA 0.114320854288  
GATAAGGC 0.0352744100494  
GATAAGTA 0.150813347783  
GATAATAA 0.108634805605  
GATAATAC 0.133015335431  
GATAATCA 0.211915797464

GATAATCC 0.420944796829  
GATAATGA 0.119135273535  
GATAATGC 0.075647272617  
GATAATTA 0.0708830682185  
GATACAAA 0.216847076341  
GATACAAC -0.0243314940285  
GATACACA 0.0247724502383  
GATACACC 0.169747377795  
GATACAGA 0.0971329094983  
GATACAGC 0.0747363196426  
GATACATA 0.17498076589  
GATACATC 0.140533418976  
GATACCAA 0.103435391314  
GATACCAC 0.209575992549  
GATACCCA 0.287546258111  
GATACCCC 0.30599548915  
GATACCGA 0.309553355008  
GATACCGC 0.275789563668  
GATACCTA 0.123085625862  
GATACGAA 0.338350985015  
GATACGAC 0.260565827026  
GATACGCA 0.357824766916  
GATACGCC 0.322473989141  
GATACGGA 0.281583236129  
GATACGGC 0.309785187186  
GATACGTA 0.281006902219  
GATACTAA 0.202631005661  
GATACTAC 0.207431694667  
GATACTCA 0.289952044846  
GATACTCC 0.340617403129  
GATACTGA 0.214207718079  
GATACTGC 0.271759742487  
GATACTTA 0.202085355795  
GATAGAAA 0.0661000124085  
GATAGAAC 0.00247220863777  
GATAGACA -0.0941767551829  
GATAGACC -0.238541640825  
GATAGAGA 0.149917155099  
GATAGAGC -0.182991048689  
GATAGATA 0.31125668781  
GATAGATC 0.143801037504  
GATAGCAA 0.195885968613  
GATAGCAC -0.0616986489347  
GATAGCCA -0.0186729429154  
GATAGCCC 0.041750180653  
GATAGCGA 0.151294545234  
GATAGCGC 0.131829959928  
GATAGCTA 0.0878688787837  
GATAGGAA -0.145466631836  
GATAGGAC -0.253815852223  
GATAGGCA -0.114150737919  
GATAGGCC -0.0019046082835  
GATAGGGA 0.161128588425  
GATAGGGC -0.0477120127945

GATAGGTA 0.148405981739  
GATAGTAA 0.24813380874  
GATAGTAC 0.0886506341052  
GATAGTCA -0.0990878835756  
GATAGTCC -0.00747441656533  
GATAGTGA 0.104772647411  
GATAGTGC 0.169916495024  
GATAGTTA 0.165668423244  
GATATAAA 0.114727675334  
GATATAAC 0.2103158325  
GATATACA 0.212881852247  
GATATACC 0.193983239438  
GATATAGA 0.291046911382  
GATATAGC 0.182318162642  
GATATATA 0.238423246206  
GATATATC 0.349542032916  
GATATCAA 0.386392285596  
GATATCAC 0.402969084787  
GATATCCA 0.478604848069  
GATATCCC 0.465728814214  
GATATCGA 0.415987612957  
GATATCGC 0.467714575593  
GATATCTA 0.462587932285  
GATATGAA 0.22738991117  
GATATGAC 0.274238520324  
GATATGCA 0.371218325764  
GATATGCC 0.391757114808  
GATATGGA 0.366519711247  
GATATGGC 0.349650007664  
GATATGTA 0.361068735721  
GATATTAA 0.292775340686  
GATATTAC 0.367313594586  
GATATTCA 0.319334486001  
GATATTCC 0.438100625534  
GATATTGA 0.166316795983  
GATATTGC 0.396926177846  
GATATTTA 0.383034549701  
GATCAAAA -0.0211010947985  
GATCAAAC -0.14785726693  
GATCAACA 0.0525966584673  
GATCAACC -0.0587527280425  
GATCAAGA 0.160591373912  
GATCAAGC -0.039760443202  
GATCAATA 0.0789581250046  
GATCAATC -0.0539760740612  
GATCACAA 0.111313793132  
GATCACAC 0.30007831523  
GATCACCA -0.0864163558462  
GATCACCC 0.102814936148  
GATCACGA 0.231842947818  
GATCACGC 0.24198716623  
GATCACTA 0.101444419626  
GATCAGAA 0.177346768256  
GATCAGAC -0.0739027612534

GATCAGCA -0.0544205379548  
GATCAGCC -0.167175313666  
GATCAGGA 0.22581121066  
GATCAGGC 0.010871753296  
GATCAGTA 0.0928358037383  
GATCATAA 0.150253559344  
GATCATAC 0.12038071129  
GATCATCA 0.0858951993752  
GATCATCC 0.243973489632  
GATCATGA 0.120730923761  
GATCATGC 0.0688036028408  
GATCATTAA 0.0882484325161  
GATCCAAA 0.244915714613  
GATCCAAC 0.222769483586  
GATCCACA 0.0801814558805  
GATCCACC 0.107278457453  
GATCCAGA 0.348961909568  
GATCCAGC 0.0779206274354  
GATCCATA 0.174751647774  
GATCCATC 0.0216075560389  
GATCCCAA 0.221360846113  
GATCCCAC 0.248598205879  
GATCCCCA 0.338513444574  
GATCCCCC 0.244022259174  
GATCCCGA 0.243207638117  
GATCCCGC 0.147048604775  
GATCCCTA 0.160533812049  
GATCCGAA 0.27047570987  
GATCCGAC 0.0528798639446  
GATCCGCA 0.194642528239  
GATCCGCC 0.183989401692  
GATCCGGA 0.380861577831  
GATCCGGC 0.103842571607  
GATCCGTA 0.217725990453  
GATCCTAA 0.220050629142  
GATCCTAC 0.224341802734  
GATCCTCA 0.305681714773  
GATCCTCC 0.38581271943  
GATCCTGA 0.302531321478  
GATCCTGC 0.324211148661  
GATCCTTA 0.300146412884  
GATCGAAA 0.0207053860134  
GATCGAAC -0.128863022802  
GATCGACA -0.16650535633  
GATCGACC -0.152394186787  
GATCGAGA 0.147438568624  
GATCGAGC -0.123223349904  
GATCGATA 0.137447355167  
GATCGATC 0.0984122652509  
GATCGCAA 0.336652079076  
GATCGCAC 0.389514828142  
GATCGCCA 0.210965772295  
GATCGCCC 0.3413157307  
GATCGCGA 0.415888340131

GATCGCGC 0.443028427877  
GATCGCTA 0.253100297074  
GATCGGAA 0.10295176018  
GATCGGAC -0.239942314849  
GATCGGCA 0.0601192396456  
GATCGGCC 0.0958278285877  
GATCGGGA 0.229064818721  
GATCGGGC -0.14913436965  
GATCGGTA 0.165621544409  
GATCGTAA 0.303230227473  
GATCGTAC 0.17637334304  
GATCGTCA 0.150283892708  
GATCGTCC 0.224043602831  
GATCGTGA 0.241357488522  
GATCGTGC 0.254136770728  
GATCGTTA 0.198692729356  
GATCTAAA 0.177605980636  
GATCTAAC 0.247488741122  
GATCTACA 0.30556046218  
GATCTACC 0.128256355529  
GATCTAGA 0.307186703941  
GATCTAGC 0.199749640519  
GATCTATA 0.249576286651  
GATCTCAA 0.329846061765  
GATCTCAC 0.390162989132  
GATCTCCA 0.390641810763  
GATCTCCC 0.43236644453  
GATCTCGA 0.367810193937  
GATCTCGC 0.405845239179  
GATCTCTA 0.346312854463  
GATCTGAA 0.202622570309  
GATCTGAC 0.196478847994  
GATCTGCA 0.382849280673  
GATCTGCC 0.286769632782  
GATCTGGA 0.35423164211  
GATCTGGC 0.252198479471  
GATCTGTA 0.330079633293  
GATCTTAA 0.291476099064  
GATCTTAC 0.301976573939  
GATCTTCA 0.378551753232  
GATCTTCC 0.38006463764  
GATCTTGA 0.336508689591  
GATCTTGC 0.35595643891  
GATCTTTA 0.26375273345  
GATGAAAA 0.0730037660232  
GATGAAAC -0.124132655171  
GATGAACA -0.101339707906  
GATGAACC -0.273063794203  
GATGAAGA 0.129861266225  
GATGAAGC -0.167125689568  
GATGAATA 0.16543798311  
GATGAATC 0.222571055904  
GATGACAA 0.0598870097735  
GATGACAC -0.125943628524



GATGACCA -0.00593636635694  
GATGACCC -0.237976057561  
GATGACGA 0.0100895600826  
GATGACGC -0.220924292601  
GATGACTA -0.148866497351  
GATGAGAA 0.1227703043  
GATGAGAC -0.117247896553  
GATGAGCA -0.273875213618  
GATGAGCC -0.22472247721  
GATGAGGA 0.113328175295  
GATGAGGC -0.195518943999  
GATGAGTA 0.106242199076  
GATGATAA -0.0831301645202  
GATGATAC 0.159053403479  
GATGATCA 0.0815953694742  
GATGATCC 0.226765107333  
GATGATGA -0.110100659206  
GATGATGC -0.0514364665885  
GATGATTA 0.215335169881  
GATGCAAA 0.0788530178171  
GATGCAAC -0.142368607161  
GATGCACA -0.140738107785  
GATGCACC -0.220252841179  
GATGCAGA 0.199434972162  
GATGCAGC -0.254915987815  
GATGCATA 0.113197219258  
GATGCATC -0.0476707265646  
GATGCCAA -0.0345669514963  
GATGCCAC -0.155214769597  
GATGCCCA -0.149338726086  
GATGCCCC -0.107449471909  
GATGCCGA 0.0502113683932  
GATGCCGC -0.0709772778698  
GATGCCTA -0.0184743972623  
GATGCGAA 0.146668707275  
GATGCGAC -0.177374903109  
GATGCGCA -0.0896338036393  
GATGCGCC -0.0981532496684  
GATGCGGA 0.120565973008  
GATGCGGC -0.281964876882  
GATGCGTA 0.220782756582  
GATGCTAA 0.0802894827121  
GATGCTAC -0.0109172791837  
GATGCTCA -0.107774772316  
GATGCTCC -0.0692345446173  
GATGCTGA 0.092027288997  
GATGCTGC 0.0392597242396  
GATGCTTA 0.227442489515  
GATGGAAA -0.0869292912141  
GATGGAAC -0.22947452148  
GATGGACA -0.176335594897  
GATGGACC -0.298493104998  
GATGGAGA 0.0621468143033  
GATGGAGC -0.253044149471

GATGGATA 0.253050663124  
GATGGCAA 0.0200678390603  
GATGGCAC -0.121032287591  
GATGGCCA -0.188659872057  
GATGGCCC -0.393646697003  
GATGGCGA -0.120210854496  
GATGGCGC -0.120505552791  
GATGGCTA -0.0682143623473  
GATGGGAA 0.10463218039  
GATGGGAC -0.223674051413  
GATGGGCA -0.229180013981  
GATGGGCC -0.121705855919  
GATGGGGA 0.0139967523785  
GATGGGGC -0.246700523009  
GATGGGTA 0.19743297016  
GATGGTAA 0.00682539798399  
GATGGTAC -0.216053778677  
GATGGTCA -0.280509182315  
GATGGTCC -0.107796666253  
GATGGTGA -0.161980383885  
GATGGTGC -0.197470443756  
GATGGTTA 0.0677035511328  
GATGTAAA 0.106621752808  
GATGTAAAC -0.0320681030035  
GATGTACA -0.00432837946048  
GATGTACC -0.0793273406288  
GATGTAGA 0.021517047072  
GATGTAGC -0.101118404631  
GATGTATA 0.216526443799  
GATGTCAA -0.111906593543  
GATGTCAC -0.0123884214793  
GATGTCCA 0.0503685503686  
GATGTCCC -0.180639110092  
GATGT CGA -0.0581836730162  
GATGT CGC 0.00501521864485  
GATGTCTA 0.116618614191  
GATGTGAA -0.0164473684211  
GATGTGAC -0.257565099625  
GATGTGCA -0.268892449441  
GATGTGCC -0.0590748358325  
GATGTGGA -0.0088122157909  
GATGTGGC -0.244308918764  
GATGTGTA 0.226031816941  
GATGTTAA 0.154439683803  
GATGTTAC 0.144914823606  
GATGTTCA -0.048488285361  
GATGTTCC -0.0353897359912  
GATGTTGA 0.0847682167544  
GATGTTGC -0.0257782676292  
GATGTTTA 0.219953577659  
GATTA AAA -0.0813501418633  
GATTA AAC -0.160246201367  
GATTA ACA 0.128976083522  
GATTA ACC -0.125762050111

GATTAAGA 0.1674700554  
GATTAAGC 0.0375926074612  
GATTAATA 0.235518200331  
GATTAATC 0.030048318766  
GATTACAA 0.405277178004  
GATTACAC 0.453186426575  
GATTACCA 0.44996525796  
GATTACCC 0.456584857434  
GATTACGA 0.476727516916  
GATTACGC 0.477466186872  
GATTACTA 0.399348032537  
GATTAGAA -0.0286482777749  
GATTAGAC 0.118326605987  
GATTAGCA 0.043434815296  
GATTAGCC -0.0798222464889  
GATTAGGA 0.184695955563  
GATTAGGC -0.0321988655322  
GATTAGTA 0.223729238881  
GATTATAA 0.226817660927  
GATTATAC 0.202733516784  
GATTATCA 0.278182959497  
GATTATCC 0.423223498981  
GATTATGA 0.140857499471  
GATTATGC 0.317146051946  
GATTATTA 0.286150668234  
GATTCAAA 0.197052424325  
GATTC AAC -0.0739430890946  
GATTCACA 0.231494930768  
GATTCACC 0.202111632592  
GATTCAGA 0.283331540907  
GATTCAGC 0.0179112866142  
GATTCATA 0.253161539275  
GATTCCAA 0.32106669197  
GATTCAC 0.407021014138  
GATTCCCA 0.466191651984  
GATTCCCC 0.488049896718  
GATTC CGA 0.424261512522  
GATTC CGC 0.443284882679  
GATTCCTA 0.412743516565  
GATTCGAA 0.339770900377  
GATTCGAC 0.227010757314  
GATTCGCA 0.448479415341  
GATTCGCC 0.404287207318  
GATTCGGA 0.327501587556  
GATTCGGC 0.297327077093  
GATTCGTA 0.379725455483  
GATTCTAA 0.310201385959  
GATTCTAC 0.39479286449  
GATTCTCA 0.469363302697  
GATTCTCC 0.484671868499  
GATTCTGA 0.380740244377  
GATTCTGC 0.449357272254  
GATTCTTA 0.440666992694  
GATTGAAA -0.0343941373547

GATTGAAC -0.00214391087949  
GATTGACA -0.127987736117  
GATTGACC -0.100051667443  
GATTGAGA 0.0162311071402  
GATTGAGC -0.101406432241  
GATTGATA 0.234992664394  
GATTGCAA 0.338485288643  
GATTGCAC 0.43093289928  
GATTGCCA 0.382612789501  
GATTGCCC 0.450635283024  
GATTGCGA 0.468593388466  
GATTGCGC 0.480669374609  
GATTGCTA 0.424266748876  
GATTGGAA 0.154349174836  
GATTGGAC -0.309316388608  
GATTGGCA 0.00663562111779  
GATTGGCC -0.0527510982056  
GATTGGGA 0.179853407126  
GATTGGGC -0.238532250696  
GATTGGTA 0.128769265133  
GATTGTAA 0.255027755028  
GATTGTAC 0.195945107576  
GATTGTCA 0.248326678978  
GATTGTCC 0.324383407663  
GATTGTGA 0.373188178361  
GATTGTGC 0.373115539782  
GATTGTTA 0.226513440393  
GATTTAAA 0.142867385292  
GATTTAAC 0.0551233199526  
GATTTACA 0.249123779427  
GATTTACC 0.170822337489  
GATTTAGA 0.319974244217  
GATTTAGC 0.0604125457107  
GATTTATA 0.336014467578  
GATTTCAA 0.397362086508  
GATTTCAC 0.449338335657  
GATTTCCA 0.476828067737  
GATTTCCC 0.4922863003  
GATTTCGA 0.461595001569  
GATTTCGC 0.471965577396  
GATTTCTA 0.440833412407  
GATTTGAA 0.263625614038  
GATTTGAC 0.266592426235  
GATTTGCA 0.399675189594  
GATTTGCC 0.445684542274  
GATTTGGA 0.232338399005  
GATTTGGC 0.214358987086  
GATTTGTA 0.411967063482  
GATTTTAA 0.349466070086  
GATTTTAC 0.402423084241  
GATTTTCA 0.470149558769  
GATTTTCC 0.470386049941  
GATTTTGA 0.34795350666  
GATTTTGC 0.402733926474

GATTTTTA 0.423408976446  
GCAAAAAA 0.250611087674  
GCAAAAAC -0.194645018458  
GCAAAAACA -0.159855813091  
GCAAAAACC -0.0339634087494  
GCAAAAAGA 0.0507171749758  
GCAAAAAGC -0.0272532005415  
GCAAAAATA 0.157808953089  
GCAAACAA 0.000122712243924  
GCAAACAC -0.017906907148  
GCAAACCA -0.0326708720375  
GCAAACCC -0.106160699559  
GCAAACGA -0.161250782463  
GCAAACGC -0.139793974186  
GCAAACCTA 0.0231209170603  
GCAAAGAA 0.0222357343569  
GCAAAGAC -0.241026467889  
GCAAAGCA -0.0742487033774  
GCAAAGCC -0.0938333181689  
GCAAAGGA -0.140403338545  
GCAAAGGC -0.410987813365  
GCAAAGTA 0.0023904586031  
GCAAATAA 0.179012345679  
GCAAATAC 0.273596198623  
GCAAATCA 0.326821310482  
GCAAATCC 0.43637439092  
GCAAATGA -0.0902118931702  
GCAAATGC 0.0908256197732  
GCAAATTA 0.0423136719634  
GCAACAAA 0.113082925191  
GCAACAAC -0.0958146901893  
GCAACACA -0.22246200284  
GCAACACC -0.201143770574  
GCAACAGA 0.00838496386552  
GCAACAGC -0.181741427498  
GCAACATA 0.104262664869  
GCAACCAA -0.0582417903258  
GCAACCAC -0.206854061743  
GCAACCCA -0.0698151213083  
GCAACCCC -0.105607244759  
GCAACCGA -0.170287586564  
GCAACCGC -0.127506361534  
GCAACCTA -0.0776574235601  
GCAACGAA 0.0349089088475  
GCAACGAC -0.167776371692  
GCAACGCA 0.0201234292143  
GCAACGCC -0.246013652465  
GCAACGGA -0.134200533722  
GCAACGGC -0.269369390402  
GCAACGTA -0.00301541210632  
GCAACTAA 0.163583693887  
GCAACTAC -0.0211798281789  
GCAACTCA -0.0217090368606  
GCAACTCC -0.19652758826

GCAACTGA -0.0485492440849  
GCAACTGC -0.156338990275  
GCAACTTA -0.238246299008  
GCAAGAAA 0.0474969323462  
GCAAGAAC -0.220908627273  
GCAAGACA -0.0114749312059  
GCAAGACC -0.095181588417  
GCAAGAGA 0.159481909155  
GCAAGAGC -0.192886109939  
GCAAGATA 0.274854565228  
GCAAGCAA 0.0201214571944  
GCAAGCAC -0.182421358227  
GCAAGCCA -0.136342334147  
GCAAGCCC -0.230630645093  
GCAAGCGA -0.108796745665  
GCAAGCGC 0.0131648837152  
GCAAGCTA -0.268264975113  
GCAAGGAA -0.0444793000209  
GCAAGGAC -0.0958425358381  
GCAAGGCA -0.146571048082  
GCAAGGCC -0.0971685182671  
GCAAGGGA -0.146314262949  
GCAAGGGC -0.205505849664  
GCAAGGTA 0.135786077677  
GCAAGTAA 0.162213177365  
GCAAGTAC -0.00875674255308  
GCAAGTCA -0.0495529294979  
GCAAGTCC -0.222618608065  
GCAAGTGA -0.084867651803  
GCAAGTGC -0.10822166141  
GCAAGTTA 0.0013911983609  
GCAATAAA 0.0640764383278  
GCAATAAC -0.137752383899  
GCAATACA 0.180100435757  
GCAATACC 0.142766946709  
GCAATAGA 0.0559554044403  
GCAATAGC -0.0865821277018  
GCAATATA 0.306468471493  
GCAATCAA 0.411437608407  
GCAATCAC 0.288185660168  
GCAATCCA 0.445992824781  
GCAATCCC 0.419969635701  
GCAATCGA 0.238843526722  
GCAATCGC 0.379510769677  
GCAATCTA 0.468025877117  
GCAATGAA -0.0469783913268  
GCAATGAC -0.0953724069585  
GCAATGCA 0.177644586735  
GCAATGCC -0.12878804466  
GCAATGGA -0.0385341926819  
GCAATGGC -0.27756550745  
GCAATGTA 0.0251946161037  
GCAATTAA 0.154971059028  
GCAATTAC 0.00820346999701

GCAATTCA 0.22077862987  
GCAATTCC 0.162152510637  
GCAATTGA 0.0167394050389  
GCAATTGC 0.203753317953  
GCAATTTA 0.192249074838  
GCACAAAA 0.0986775158093  
GCACAAAC -0.0519045216015  
GCACAACA -0.00082822542621  
GCACAACC -0.143525295884  
GCACAAGA 0.114949660404  
GCACAAGC -0.150947210476  
GCACAATA 0.206714979442  
GCACACAA 0.114914653788  
GCACACAC -0.248999175405  
GCACACCA -0.156917964069  
GCACACCC -0.272617998289  
GCACACGA -0.103005841859  
GCACACGC 0.0183984093898  
GCACACTA -0.199038945686  
GCACAGAA 0.0819799566433  
GCACAGAC -0.228352459674  
GCACAGCA -0.0465212511148  
GCACAGCC -0.134654358058  
GCACAGGA -0.127477742468  
GCACAGGC -0.182504830978  
GCACAGTA 0.00255291957218  
GCACATAA 0.0433355473968  
GCACATAC 0.0665715349299  
GCACATCA -0.0709759346123  
GCACATCC -0.134550850043  
GCACATGA -0.0446070524003  
GCACATGC -0.0418083232002  
GCACATTA -0.047309017006  
GCACCAAA 0.0233056748208  
GCACCAAC -0.333727471425  
GCACCACA -0.031083095041  
GCACCACC -0.119317493516  
GCACCAGA -0.0928815783308  
GCACCAGC -0.107972386947  
GCACCATA -0.00786047755745  
GCACCCAA -0.19322508692  
GCACCCAC -0.23190356741  
GCACCCCA -0.0373217551742  
GCACCCCC -0.390913653227  
GCACCCGA -0.167922182806  
GCACCCGC -0.244981299806  
GCACCCTA -0.133043801961  
GCACCGAA -0.126512037014  
GCACCGAC -0.253176001036  
GCACCGCA 0.133167156924  
GCACCGCC -0.169391126919  
GCACCGGA 0.092195791333  
GCACCGGC -0.232567658076  
GCACCGTA -0.0144967628446

GCACCTAA -0.0231812442063  
GCACCTAC -0.260431741936  
GCACCTCA -0.1421141437  
GCACCTCC -0.29186957226  
GCACCTGA -0.254989775976  
GCACCTGC -0.125586242835  
GCACCTTA -0.0964470364396  
GCACGAAA 0.0533384624294  
GCACGAAC -0.240303216476  
GCACGACA -0.260305448731  
GCACGACC -0.175112426053  
GCACGAGA -0.0508479152771  
GCACGAGC -0.321385353698  
GCACGATA 0.0771304278009  
GCACGCAA 0.186711504893  
GCACGCAC -0.0910346770274  
GCACGCCA -0.297948698493  
GCACGCCC -0.395803029662  
GCACGCGA -0.0942563962578  
GCACGCGC 0.207025393605  
GCACGCTA -0.344082242455  
GCACGGAA 0.0556603435391  
GCACGGAC -0.205505830983  
GCACGGCA 0.0675951433527  
GCACGGCC -0.251636743002  
GCACGGGA -0.0146164682525  
GCACGGGC -0.220876991314  
GCACGGTA 0.0800617504726  
GCACGTAA 0.179688765939  
GCACGTAC -0.112900335514  
GCACGTCA 0.0154325087772  
GCACGTCC -0.110113016314  
GCACGTGA -0.0930782654724  
GCACGTGC 0.137248173231  
GCACGTTA -0.202234800771  
GCACTAAA -0.027188433129  
GCACTAAC -0.162757454186  
GCACTACA 0.127082618629  
GCACTACC -0.133176535442  
GCACTAGA -0.0814237644431  
GCACTAGC -0.191529864441  
GCACTATA 0.117135340399  
GCACTCAA -0.0219593731524  
GCACTCAC -0.319960458449  
GCACTCCA -0.139743284724  
GCACTCCC -0.213243503172  
GCACTCGA -0.325852756564  
GCACTCGC 0.178593899404  
GCACTCTA -0.258768048215  
GCACTGAA 0.0240033421852  
GCACTGAC -0.163533145294  
GCACTGCA 0.0482615112204  
GCACTGCC -0.121740520232  
GCACTGGA -0.125019890075



GCACTGGC -0.207813026722  
GCACTGTA 0.0603220367437  
GCACTTAA 0.0301899695839  
GCACTTAC -0.121149843554  
GCACTTCA -0.0718483120401  
GCACTTCC -0.144818077787  
GCACTTGA -0.229156054651  
GCACTTTA -0.27763029857  
GCAGAAAA -0.0369860218345  
GCAGAAAC -0.147474120939  
GCAGAACA -0.20439224443  
GCAGAACC -0.18598134963  
GCAGAAGA 0.0611829804252  
GCAGAAGC -0.225429388269  
GCAGAATA 0.00294519098122  
GCAGACAA 0.185830237294  
GCAGACAC -0.249901455699  
GCAGACCA -0.122911789926  
GCAGACCC -0.153319162897  
GCAGACGA -0.0980496761867  
GCAGACGC -0.0421461168328  
GCAGACTA -0.298057382361  
GCAGAGAA 0.119233558627  
GCAGAGAC -0.274678816088  
GCAGAGCA -0.203802999479  
GCAGAGCC -0.163236052188  
GCAGAGGA 0.0973494155312  
GCAGAGGC -0.0777099771538  
GCAGAGTA 0.00942217810316  
GCAGATAA 0.225533017525  
GCAGATAC 0.30522749628  
GCAGATCA 0.112800127952  
GCAGATCC 0.325825825826  
GCAGATGA -0.148113097874  
GCAGATGC 0.0221739669934  
GCAGATTA 0.233728218577  
GCAGCAAA 0.164153339708  
GCAGCAAC -0.213354173386  
GCAGCACA -0.293588969654  
GCAGCACC -0.106158745916  
GCAGCAGA -0.104658920178  
GCAGCAGC -0.292108600878  
GCAGCATA 0.0579629643147  
GCAGCCAA 0.0207025207025  
GCAGCCAC -0.167668878831  
GCAGCCCA -0.267483096645  
GCAGCCCC -0.221239422315  
GCAGCCGA -0.196854142372  
GCAGCCGC -0.0881168052281  
GCAGCCTA -0.276155506488  
GCAGCGAA -0.0425423686757  
GCAGCGAC -0.356587094166  
GCAGCGCA -0.198104589756  
GCAGCGCC -0.261069630144

GCAGCGGA 0.100877557902  
GCAGCGGC -0.396672427146  
GCAGCGTA 0.0206914903885  
GCAGCTAA 0.159712053651  
GCAGCTAC -0.198151594095  
GCAGCTCA -0.0787604525942  
GCAGCTCC -0.335451424002  
GCAGCTGA -0.229982940607  
GCAGCTGC -0.0179160568551  
GCAGCTTA -0.407380846423  
GCAGGAAA 0.0425039364433  
GCAGGAAC -0.349138645617  
GCAGGACA -0.173558560421  
GCAGGACC -0.198153982706  
GCAGGAGA -0.0184840539192  
GCAGGAGC -0.206955435924  
GCAGGATA 0.186750110993  
GCAGGCAA -0.098426130426  
GCAGGCAC -0.220970792509  
GCAGGCCA -0.296951453153  
GCAGGCCC -0.43895819039  
GCAGGCGA -0.191855416904  
GCAGGCGC -0.143599560367  
GCAGGCTA -0.263702490911  
GCAGGGAA 0.138787471807  
GCAGGGAC -0.291058638071  
GCAGGGCA -0.18807532938  
GCAGGGCC -0.212998908541  
GCAGGGGA -0.127231114972  
GCAGGGGC -0.346706517515  
GCAGGGTA -0.0817195406102  
GCAGGTAA 0.237176558178  
GCAGGTAC -0.0932124650891  
GCAGGTCA -0.22797419675  
GCAGGTCC -0.27447687976  
GCAGGTGA -0.117956120252  
GCAGGTTA -0.152726749897  
GCAGTAAA 0.0846950278827  
GCAGTAAC -0.119402059298  
GCAGTACA -0.199820057529  
GCAGTACC -0.055169571199  
GCAGTAGA -0.254896365911  
GCAGTAGC -0.205755853866  
GCAGTATA 0.120052115647  
GCAGTCAA 0.0288824230092  
GCAGTCAC -0.217350219419  
GCAGTCCA -0.282272001852  
GCAGTCCC -0.270793919382  
GCAGTCGA -0.185173163707  
GCAGTCGC -0.0982018784585  
GCAGTCTA -0.29025867994  
GCAGTGAA -0.0766809617924  
GCAGTGAC -0.28815972653  
GCAGTGCA -0.117212723779

GCAGTGCC -0.195877126972  
GCAGTGGA -0.0522802025866  
GCAGTGGC 0.0487665845801  
GCAGTGTA -0.016015460208  
GCAGTTAA 0.0825405283096  
GCAGTTAC -0.0387095084065  
GCAGTTCA -0.0575985156144  
GCAGTTCC -0.23968468475  
GCAGTTGA -0.120762739697  
GCAGTTTA -0.203718868127  
GCATAAAA 0.107243637001  
GCATAAAC -0.301251354324  
GCATAACA -0.0715612066889  
GCATAACC -0.158243424923  
GCATAAGA 0.227629321986  
GCATAAGC -0.192914236179  
GCATAATA 0.0734963613751  
GCATACAA 0.194953907075  
GCATACAC -0.0911461792807  
GCATACCA -0.101130901729  
GCATACCC -0.180691001431  
GCATACGA 0.102544123084  
GCATACGC -0.135447360932  
GCATACTA -0.0733639976064  
GCATAGAA 0.138235659073  
GCATAGAC -0.101868891551  
GCATAGCA -0.0256182326208  
GCATAGCC -0.148686282133  
GCATAGGA 0.100300723342  
GCATAGGC -0.206737553979  
GCATAGTA -0.0272738303041  
GCATATAA 0.245019790555  
GCATATAC 0.18759516215  
GCATATCA 0.27557571732  
GCATATCC 0.396151179171  
GCATATGA 0.0352873534692  
GCATATGC 0.136754892963  
GCATATTA -0.0743576169166  
GCATCAAA -0.00812244751639  
GCATCAAC -0.119381794021  
GCATCACA 0.0604945777601  
GCATCACC -0.105942339718  
GCATCAGA 0.179604096261  
GCATCAGC -0.1012768622  
GCATCATA 0.0496419786428  
GCATCCAA -0.0750599083932  
GCATCCAC -0.139068277128  
GCATCCCA -0.212018226639  
GCATCCCC -0.224069524747  
GCATCCGA -0.0929827318571  
GCATCCGC -0.115896089185  
GCATCCTA -0.261176908426  
GCATCGAA -0.0742528393346  
GCATCGAC -0.179737828058

GCATCGCA 0.0800588308285  
GCATCGCC -0.188483349737  
GCATCGGA 0.0368943515259  
GCATCGGC -0.0937038901902  
GCATCGTA 0.0142485930965  
GCATCTAA 0.128957030138  
GCATCTAC 0.20779180018  
GCATCTCA -0.034472009231  
GCATCTCC -0.32928896939  
GCATCTGA -0.0856735607218  
GCATCTTA -0.0373936754889  
GCATGAAA 0.218045952537  
GCATGAAC -0.241775295658  
GCATGACA -0.32877101127  
GCATGACC -0.252809685663  
GCATGAGA 0.116905587127  
GCATGAGC -0.244189948944  
GCATGATA 0.0317854353554  
GCATGCAA 0.155330261391  
GCATGCAC -0.219709961746  
GCATGCCA -0.152765715767  
GCATGCCC -0.272423816591  
GCATGCGA 0.0827715867067  
GCATGCGC 0.151587191521  
GCATGCTA -0.326437826613  
GCATGGAA 0.0549703291169  
GCATGGAC -0.208868555983  
GCATGGCA -0.234798631027  
GCATGGCC -0.323103312919  
GCATGGGA -0.0201868535202  
GCATGGGC -0.269213382178  
GCATGGTA 0.00714350714351  
GCATGTAA 0.1620803924  
GCATGTAC 0.106998386897  
GCATGTCA 0.0244133340146  
GCATGTCC -0.337246292429  
GCATGTGA -0.0450353735201  
GCATGTTA -0.284971893463  
GCATTAAC 0.0315966449115  
GCATTAAA 0.0315966449115  
GCATTAAAC -0.217469004721  
GCATTACA -0.14333391231  
GCATTACC 0.00420743828769  
GCATTAGA -0.0105318861631  
GCATTAGC -0.241053875961  
GCATTATA 0.205264970097  
GCATTCAA -0.0641619581014  
GCATTCAC -0.14565621301  
GCATTCOA -0.225359337672  
GCATTCOC -0.124111085426  
GCATTCOG -0.0405107586926  
GCATTCOHA -0.0249855842573  
GCATTCOHB -0.246588708183  
GCATTCOGA -0.0452046876665  
GCATTCOHA -0.200518837978

GCATTGCA -0.180227091622  
GCATTGCC -0.165098311635  
GCATTGGA 0.0747567571513  
GCATTGGC -0.241696541544  
GCATTGTA -0.118015663891  
GCATTTAA 0.199872198923  
GCATTTAC 0.114574863324  
GCATTTCA -0.0962629295963  
GCATTTCC 0.142282285789  
GCATTTGA -0.0250541958935  
GCATTTTA -0.0210853530185  
GCCAAAAA -0.0339970657577  
GCCAAAAC -0.0788710004686  
GCCAAACA -0.247607942376  
GCCAAACC -0.273160208962  
GCCAAAGA 0.0420082447505  
GCCAAAGC -0.195560242043  
GCCAAATA -0.141777973689  
GCCAACAA -0.0124159972645  
GCCAACAC -0.157227384912  
GCCAACCA -0.273733704034  
GCCAACCC -0.299448951519  
GCCAACGA -0.168491263102  
GCCAACGC -0.259328630772  
GCCAACTA -0.217185876178  
GCCAAGAA 0.155376889557  
GCCAAGAC -0.249093805905  
GCCAAGCA -0.337396419977  
GCCAAGCC -0.370485228097  
GCCAAGGA -0.0151237356744  
GCCAAGGC -0.325955647062  
GCCAAGTA -0.00391305299884  
GCCAATAA 0.0996438034204  
GCCAATAC -0.0435873017843  
GCCAATCA -0.156301040552  
GCCAATCC -0.16683071816  
GCCAATGA -0.20251150248  
GCCAATTA 0.0131289067562  
GCCACAAA -0.00330868667109  
GCCACAAC -0.028146224618  
GCCACACA -0.0192800319863  
GCCACACC -0.191959916746  
GCCACAGA -0.167147792473  
GCCACAGC -0.259900696667  
GCCACATA -0.0870712590594  
GCCACCAA -0.306284686094  
GCCACCAC -0.105886293874  
GCCACCCA -0.206701109919  
GCCACCCC -0.174712930495  
GCCACCGA -0.224253255275  
GCCACCGC -0.330711091332  
GCCACCTA -0.184792709324  
GCCACGAA -0.0109103593952  
GCCACGAC -0.251085987442

GCCACGCA -0.214044301886  
GCCACGCC -0.196825711899  
GCCACGGA -0.0912331636804  
GCCACGGC -0.181709660433  
GCCACGTA -0.081352916362  
GCCACTAA 0.0371167054736  
GCCACTAC -0.0875930361723  
GCCACTCA -0.185899291684  
GCCACTCC -0.284769936748  
GCCACTGA -0.302864805122  
GCCACTTA -0.175833502396  
GCCAGAAA 0.0239068269371  
GCCAGAAC -0.231810003021  
GCCAGACA -0.259941455186  
GCCAGACC -0.354420053192  
GCCAGAGA -0.0117723127997  
GCCAGAGC -0.370288858121  
GCCAGATA 0.249155857901  
GCCAGCAA -0.184397644432  
GCCAGCAC -0.296458007067  
GCCAGCCA -0.188025068171  
GCCAGCCC -0.414757302797  
GCCAGCGA -0.126123257039  
GCCAGCGC -0.255908258354  
GCCAGCTA -0.116807181354  
GCCAGGAA 0.193930789837  
GCCAGGAC -0.249040230782  
GCCAGGCA -0.127989213824  
GCCAGGCC -0.295306985993  
GCCAGGGA 0.0244880293234  
GCCAGGGC -0.36778164057  
GCCAGGTA -0.0748762376238  
GCCAGTAA 0.0330090742901  
GCCAGTAC -0.201875604734  
GCCAGTCA -0.0806515643997  
GCCAGTCC -0.23360178997  
GCCAGTGA -0.207559105907  
GCCAGTTA -0.0946111400657  
GCCATAAA -0.134507786023  
GCCATAAC -0.270041173698  
GCCATACA -0.150955968105  
GCCATACC -0.230107669696  
GCCATAGA -0.118366021182  
GCCATAGC -0.323902940812  
GCCATATA -0.0748172414839  
GCCATCAA -0.132469089857  
GCCATCAC -0.232848274934  
GCCATCCA -0.140734721223  
GCCATCCC -0.310490994529  
GCCATCGA -0.100046128087  
GCCATCGC -0.127167263534  
GCCATCTA -0.192105735539  
GCCATGAA -0.0175538735162  
GCCATGAC -0.390357154842

GCCATGCA -0.33999031111  
GCCATGCC -0.0900847951765  
GCCATGGA 0.0952367578498  
GCCATGGC -0.324049502741  
GCCATGTA -0.175517615042  
GCCATTAA 0.0662983596794  
GCCATTAC -0.183440990056  
GCCATTCA -0.118011951345  
GCCATTCC -0.0578534776611  
GCCATTGA -0.215948286558  
GCCATTTA -0.206718623437  
GCCCAAAA 0.0979650080655  
GCCCAAAC -0.226507642111  
GCCCAACA -0.350090970237  
GCCCAACC -0.170595436011  
GCCCAAGA 0.0261188242884  
GCCCAAGC -0.212437270808  
GCCCAATA -0.168698052351  
GCCCACAA 0.0411750107662  
GCCCACAC -0.106255036116  
GCCCACCA -0.3291790386  
GCCCACCC -0.123841121454  
GCCCACGA -0.0988535126684  
GCCCACGC -0.221178251218  
GCCCACTA -0.179176383755  
GCCCAGAA -0.119863578574  
GCCCAGAC -0.183567370432  
GCCCAGCA -0.256070767967  
GCCCAGCC -0.29423179226  
GCCCAGGA -0.238048694494  
GCCCAGGC -0.407897558905  
GCCCAGTA -0.263390260376  
GCCCATAA 0.0864156167186  
GCCCATAC -0.180635156928  
GCCCATCA -0.289618610044  
GCCCATCC -0.153308850897  
GCCCATGA -0.32391732065  
GCCCATTA -0.0162468461761  
GCCCCAAA -0.134423231039  
GCCCCAAC -0.117922194311  
GCCCCACA -0.236841234795  
GCCCCACC -0.17091389376  
GCCCCAGA -0.0803319631071  
GCCCCAGC -0.35003480639  
GCCCCATA -0.0311685773841  
GCCCCCAA -0.401510328386  
GCCCCCAC -0.425936949674  
GCCCCCCA -0.319799598204  
GCCCCCCC -0.346645886902  
GCCCCCGA -0.311695438649  
GCCCCCGC -0.180865315438  
GCCCCCTA -0.225804951256  
GCCCCGAA 0.0509984739075  
GCCCCGAC -0.132578803797

GCCCCGCA -0.0973125758082  
GCCCCGCC 0.0620855017773  
GCCCCGGA -0.291093966791  
GCCCCGGC -0.305082210512  
GCCCCGTA -0.305521226226  
GCCCCCTAA -0.204100529294  
GCCCCCTAC -0.257879893143  
GCCCCCTCA -0.269302430702  
GCCCCCTCC -0.334752781705  
GCCCCCTGA -0.324540516407  
GCCCCCTTA -0.101427039307  
GCCCCGAAA -0.116503458533  
GCCCCGAAC -0.134359433176  
GCCCCGACA -0.231430256822  
GCCCCGACC -0.383212264543  
GCCCCGAGA -0.164550750289  
GCCCCGAGC -0.289313663064  
GCCCCGATA -0.0819815646602  
GCCCCGCAA -0.0421311942074  
GCCCCGCAC -0.241868086737  
GCCCCGCCA -0.134264373872  
GCCCCGCCC -0.234641106573  
GCCCCGCGA -0.137243468958  
GCCCCGCGC -0.310737690924  
GCCCCGCTA -0.327629476695  
GCCCCGGAA -0.119136511514  
GCCCCGGAC -0.20195316269  
GCCCCGGCA -0.267145168537  
GCCCCGGCC -0.348167164113  
GCCCCGGGA -0.108145924143  
GCCCCGGGC -0.385090895563  
GCCCCGGTA -0.269218963165  
GCCCCGTAA -0.00113320331431  
GCCCCGTAC -0.0964681526375  
GCCCCGTCA -0.265699319371  
GCCCCGTCC -0.264943738901  
GCCCCGTGA -0.142131685813  
GCCCCGTTA -0.135155156383  
GCCCTAAA -0.127519815693  
GCCCTAAC -0.27601849244  
GCCCTACA -0.126866165438  
GCCCTACC -0.235166421246  
GCCCTAGA -0.135845815792  
GCCCTAGC -0.290769820203  
GCCCTATA -0.133025663929  
GCCCTCAA -0.000406560440282  
GCCCTCAC -0.308118396498  
GCCCTCCA -0.400790820011  
GCCCTCCC -0.31182073246  
GCCCTCGA -0.285723333268  
GCCCTCGC -0.361106288221  
GCCCTCTA -0.286407472638  
GCCCTGAA -0.0759252257868  
GCCCTGAC -0.250686473309



GCCCTGCA -0.256999749148  
GCCCTGCC -0.278932221516  
GCCCTGGA -0.154955960799  
GCCCTGTA -0.110008063516  
GCCCTTAA 0.0410948138221  
GCCCTTAC -0.283984763669  
GCCCTTCA -0.280472107145  
GCCCTTCC -0.288193496997  
GCCCTTGA -0.211897467067  
GCCCTTTA -0.219619470744  
GCCGAAAA 0.160732357702  
GCCGAAAC -0.153728957229  
GCCGAACA -0.0526816952433  
GCCGAACC -0.179257980086  
GCCGAAGA 0.0819850112912  
GCCGAAGC -0.124931216128  
GCCGAATA 0.0028196188518  
GCCGACAA -0.00476558907469  
GCCGACAC -0.45403613781  
GCCGACCA -0.298240941667  
GCCGACCC -0.343858013478  
GCCGACGA -0.23163792747  
GCCGACGC -0.183657615303  
GCCGACTA -0.113640509418  
GCCGAGAA -0.119313843058  
GCCGAGAC -0.322854934463  
GCCGAGCA -0.14544482111  
GCCGAGCC -0.160574210581  
GCCGAGGA -0.127980764319  
GCCGAGGC -0.0576404023654  
GCCGAGTA -0.0084892054589  
GCCGATAA -0.0266629197901  
GCCGATAC 0.0620358650662  
GCCGATCA -0.0796770022634  
GCCGATCC 0.13960103354  
GCCGATGA -0.317412672031  
GCCGATTA 0.096294971643  
GCCGAAA -0.0708009102547  
GCCGCAAC -0.175095846051  
GCCGCACA -0.111287146921  
GCCGCACC -0.406356291431  
GCCGCAGA -0.0366572424856  
GCCGCAGC -0.185664090605  
GCCGCATA -0.0988193910217  
GCCGCCAA -0.154156931819  
GCCGCCAC -0.209208215832  
GCCGCCCA -0.145492667676  
GCCGCCCC -0.182669643965  
GCCGCCGA -0.176866772608  
GCCGCCGC -0.348858904295  
GCCGCCTA -0.1657127339  
GCCGCGAA 0.00398730601753  
GCCGCGAC -0.245502816168  
GCCGCGCA 0.0142734959155

GCCGCGCC -0.211614826793  
GCCGCGGA 0.00889826419048  
GCCGCGGC 0.0765943988292  
GCCGCGTA -0.106066121218  
GCCGCTAA -0.121548433246  
GCCGCTAC -0.320858997763  
GCCGCTCA -0.206539142466  
GCCGCTCC -0.118000977838  
GCCGCTGA -0.442771027213  
GCCGCTTA -0.20204213295  
GCCGGAAA -0.0402249409247  
GCCGGAAC -0.146444208777  
GCCGGACA -0.148605850975  
GCCGGACC -0.299215267958  
GCCGGAGA -0.0578420913606  
GCCGGAGC -0.218643773416  
GCCGGATA 0.215045624137  
GCCGGCAA -0.253480619601  
GCCGGCAC -0.249529712399  
GCCGGCCA -0.247632508731  
GCCGGCCC -0.184210449506  
GCCGGCGA -0.080563992463  
GCCGGCGC -0.315359679807  
GCCGGCTA -0.320712271212  
GCCGGGAA -0.110858842764  
GCCGGGAC -0.316622042591  
GCCGGGCA -0.267461616688  
GCCGGGCC -0.386099346859  
GCCGGGGA -0.140715322401  
GCCGGGTA -0.0865335707019  
GCCGGTAA -0.128461613695  
GCCGGTAC -0.310196234092  
GCCGGTCA -0.11134198338  
GCCGGTCC -0.193239948336  
GCCGGTGA -0.300537816701  
GCCGGTTA -0.160700327552  
GCCGTA AA -0.256143656262  
GCCGTAA C -0.241675289214  
GCCGTACA -0.208182766785  
GCCGTACC -0.11712233093  
GCCGTAGA -0.155983366441  
GCCGTAGC -0.275659524971  
GCCGTATA -0.0893243213652  
GCCGTCAA -0.040743957756  
GCCGTCAC -0.191694162594  
GCCGTCCA -0.253552890979  
GCCGTCCC -0.0701633654479  
GCCGTCGA -0.209439762703  
GCCGTCGC -0.238384865801  
GCCGTCTA -0.175962564192  
GCCGTGAA 0.0152018568936  
GCCGTGAC -0.350885216421  
GCCGTGCA -0.3083084573  
GCCGTGCC -0.250282756316

GCCGTGGA 0.000441190663303  
GCCGTGTA 0.00289847667569  
GCCGTTAA -0.148848298904  
GCCGTTAC -0.345370301462  
GCCGTTCA 0.00059779712853  
GCCGTTC -0.00943024421858  
GCCGTTGA -0.219820270761  
GCCGTTTA -0.153951236758  
GCCTAAAA 0.0363444596104  
GCCTAAAC -0.158707778952  
GCCTAACA -0.188373803731  
GCCTAACC -0.302726854264  
GCCTAAGA 0.0629100174555  
GCCTAAGC -0.149221743033  
GCCTAATA -0.0441753448528  
GCCTACAA 0.0125731792398  
GCCTACAC -0.281525322561  
GCCTACCA -0.0755822449413  
GCCTACCC -0.195607222319  
GCCTACGA -0.0788316504999  
GCCTACGC -0.317806830037  
GCCTACTA -0.178648318599  
GCCTAGAA -0.0646296834241  
GCCTAGAC -0.371080518693  
GCCTAGCA -0.265516937216  
GCCTAGCC -0.214758301286  
GCCTAGGA -0.0792348051986  
GCCTAGGC -0.217566066699  
GCCTAGTA -0.187609075044  
GCCTATAA 0.151020405497  
GCCTATAC -0.177206987357  
GCCTATCA 0.0918149554513  
GCCTATCC -0.0161263191566  
GCCTATGA -0.24491125616  
GCCTATTA -0.171881332242  
GCCTCAAA -0.203006668927  
GCCTCAAC -0.111218629989  
GCCTCACA -0.276223684383  
GCCTCACC -0.256601903917  
GCCTCAGA -0.0635049877168  
GCCTCAGC -0.342571692367  
GCCTCATA -0.0456926763227  
GCCTCCAA -0.125826601575  
GCCTCCAC -0.31774380181  
GCCTCCCA -0.189948354325  
GCCTCCCC -0.293676188901  
GCCTCCGA -0.290401973349  
GCCTCCGC -0.230454461507  
GCCTCCTA -0.148734366585  
GCCTCGAA -0.0887284217144  
GCCTCGAC -0.369911213896  
GCCTCGCA -0.293305051808  
GCCTCGCC -0.348730949654  
GCCTCGGA -0.114276436291

GCCTCGTA -0.106630268437  
GCCTCTAA -0.186492001699  
GCCTCTAC -0.294913782409  
GCCTCTCA 0.0772855299402  
GCCTCTCC -0.200909973219  
GCCTCTGA -0.275363652862  
GCCTCTTA -0.172582931091  
GCCTGAAA -0.0362061691937  
GCCTGAAC -0.214243598444  
GCCTGACA -0.0533049460696  
GCCTGACC -0.289809233212  
GCCTGAGA -0.119598645523  
GCCTGAGC -0.399307434971  
GCCTGATA 0.0970540791078  
GCCTGCAA -0.127142293809  
GCCTGCAC -0.346588678882  
GCCTGCCA -0.41619335797  
GCCTGCCC -0.36281221321  
GCCTGCGA -0.216556312653  
GCCTGCGC -0.248941989308  
GCCTGCTA -0.279402805689  
GCCTGGAA -0.210464439979  
GCCTGGAC -0.310604258573  
GCCTGGCA -0.176756094599  
GCCTGGCC -0.178118884558  
GCCTGGGA -0.0816440463489  
GCCTGGTA -0.157330455564  
GCCTGTAA 0.0409005642212  
GCCTGTAC -0.134454511351  
GCCTGTCA 0.0962891323548  
GCCTGTCC 0.0209289820904  
GCCTGTGA -0.257759806394  
GCCTGTTA -0.109359017835  
GCCTTAAA -0.152732025495  
GCCTTAAC -0.257658500421  
GCCTTACA -0.257215934383  
GCCTTACC -0.170068667586  
GCCTTAGA -0.175025136701  
GCCTTAGC -0.176629483543  
GCCTTATA -0.0935619203882  
GCCTTCAA -0.173235330604  
GCCTTCAC -0.35651121355  
GCCTTCCA -0.283811122412  
GCCTTCCC -0.304174516565  
GCCTTCGA -0.301806744577  
GCCTTCGC -0.330079304043  
GCCTTCTA -0.234506856251  
GCCTTGAA -0.171062534633  
GCCTTGAC -0.240959870341  
GCCTTGCA -0.130986358259  
GCCTTGCC -0.266406153083  
GCCTTGGA -0.00246786034745  
GCCTTGTA -0.0142164770115  
GCCTTTAA -0.111093513019

GCCTTTAC -0.216393569181  
GCCTTTCA 0.00216126654161  
GCCTTTCC -0.326581995882  
GCCTTTGA -0.12985621236  
GCCTTTTA -0.283239479712  
GCGAAAAA 0.22395349007  
GCGAAAAC -0.095550099336  
GCGAAACA -0.0254236119728  
GCGAAACC 0.0235952205649  
GCGAAAGA -0.0364670846624  
GCGAAAGC -0.0164696376818  
GCGAAATA 0.139686518474  
GCGAACAA 0.00564614200978  
GCGAACAC -0.169226940385  
GCGAACCA -0.230417497222  
GCGAACCC -0.135256459846  
GCGAACGA -0.0395890832824  
GCGAACGC -0.000415015566531  
GCGAACTA -0.169737827387  
GCGAAGAA 0.0533439775864  
GCGAAGAC -0.305069992572  
GCGAAGCA -0.168916180788  
GCGAAGCC -0.300357240319  
GCGAAGGA -0.102906666214  
GCGAAGTA -0.0394723589116  
GCGAATAA 0.160235253245  
GCGAATAC 0.284409754107  
GCGAATCA 0.350093793567  
GCGAATCC 0.448317463469  
GCGAATGA 0.322097326336  
GCGAATTA -0.103045178467  
GCGACAAA 0.0498434340854  
GCGACAAC -0.0715524477566  
GCGACACA -0.0495843156719  
GCGACACC -0.205358458847  
GCGACAGA -0.128299351003  
GCGACAGC -0.152237028214  
GCGACATA -0.182402007418  
GCGACCAA -0.194937239301  
GCGACCAC -0.166844486349  
GCGACCCA -0.244596059753  
GCGACCCC -0.204627404285  
GCGACCGA -0.0390712664974  
GCGACCGC -0.26233303612  
GCGACCTA -0.287523732111  
GCGACGAA 0.0381969430039  
GCGACGAC -0.162310125099  
GCGACGCA 0.142026816931  
GCGACGCC -0.160004232434  
GCGACGGA -0.0444846646319  
GCGACGTA -0.137484801112  
GCGACTAA -0.184042287668  
GCGACTAC -0.0201160792878  
GCGACTCA -0.16000633437

GCGACTCC -0.185296233759  
GCGACTGA 0.0655664474501  
GCGACTTA -0.314175781928  
GCGAGAAA 0.0673505121948  
GCGAGAAC -0.311453742065  
GCGAGACA -0.152612343848  
GCGAGACC -0.171717621371  
GCGAGAGA -0.140648648984  
GCGAGAGC -0.233145037452  
GCGAGATA 0.234638219487  
GCGAGCAA 0.00988454018757  
GCGAGCAC -0.177329804684  
GCGAGCCA -0.272902208892  
GCGAGCCC -0.238248048808  
GCGAGCGA -0.0976531310805  
GCGAGCGC -0.0436743292167  
GCGAGCTA -0.132643023217  
GCGAGGAA 0.134203630577  
GCGAGGAC -0.284006362281  
GCGAGGCA -0.245174410035  
GCGAGGCC -0.342930934209  
GCGAGGGA -0.0616127529231  
GCGAGGTA -0.210119585414  
GCGAGTAA -0.0181638358284  
GCGAGTAC -0.18423088093  
GCGAGTCA -0.103095043134  
GCGAGTCC -0.275414470679  
GCGAGTGA 0.0325582549569  
GCGAGTTA -0.232707883704  
GCGATAAA 0.210883864082  
GCGATAAC -0.120719254323  
GCGATACA -0.0196440953848  
GCGATACC 0.11035889725  
GCGATAGA 0.0562316153661  
GCGATAGC -0.0565082989325  
GCGATATA 0.170681700985  
GCGATCAA 0.277216666253  
GCGATCAC 0.229401577886  
GCGATCCA 0.36013837529  
GCGATCCC 0.288109749422  
GCGATCGA 0.132665723575  
GCGATCGC 0.397089021745  
GCGATCTA 0.389287095903  
GCGATGAA 0.0931799568163  
GCGATGAC -0.113217587423  
GCGATGCA 0.0608066976636  
GCGATGCC -0.0685724752646  
GCGATGGA -0.0154945120714  
GCGATGTA -0.155303312244  
GCGATTAA 0.0866572264841  
GCGATTAC 0.346022330871  
GCGATTCA 0.0714817480209  
GCGATTCC 0.339555809253  
GCGATTGA 0.0309007831945

GCGATTTA 0.037352779777  
GCGCAAAA 0.262790338548  
GCGCAAAC -0.105706525486  
GCGCAACA -0.0130499789066  
GCGCAACC -0.0459500886842  
GCGCAAGA 0.0715685057991  
GCGCAAGC -0.159909183395  
GCGCAATA 0.187133414406  
GCGCACAA 0.150721517731  
GCGCACAC -0.117279508072  
GCGCACCA -0.128593737458  
GCGCACCC -0.107034840602  
GCGCACGA -0.0171931740163  
GCGCACGC -0.219711945389  
GCGCACTA -0.186085734261  
GCGCAGAA 0.0441968424049  
GCGCAGAC -0.172103588018  
GCGCAGCA -0.135134688071  
GCGCAGCC -0.325833670192  
GCGCAGGA -0.0978825967194  
GCGCAGTA -0.130847717429  
GCGCATAA 0.217987691391  
GCGCATAC 0.105185287913  
GCGCATCA -0.100265687613  
GCGCATCC -0.0794403028105  
GCGCATGA -0.0906635898199  
GCGCATT A -0.288357031192  
GCGCCAAA 0.0966083584031  
GCGCCAAC -0.226843926174  
GCGCCACA -0.162761887721  
GCGCCACC -0.299379207388  
GCGCCAGA -0.141500486616  
GCGCCAGC -0.261606297236  
GCGCCATA -0.222781816227  
GCGCCCAA -0.163217617287  
GCGCCCAC -0.0974782687807  
GCGCCCCA -0.232833831813  
GCGCCCCC -0.262150748519  
GCGCCCCG -0.23643744228  
GCGCCCGC -0.269528398592  
GCGCCCTA -0.140775668335  
GCGCCGAA 0.0831317562389  
GCGCCGAC -0.21640453636  
GCGCCGCA 0.182012802639  
GCGCCGCC -0.165235280981  
GCGCCGGA -0.238836240046  
GCGCCGTA -0.132285833244  
GCGCCTAA 0.0732647247799  
GCGCCTAC -0.0248619510337  
GCGCCTCA 0.00934704262111  
GCGCCTCC -0.272693190871  
GCGCCTGA -0.183762486524  
GCGCCTTA -0.182946619986  
GCGCGAAA 0.115036167091

GCGCGAAC -0.143770002729  
GCGCGACA -0.151169682416  
GCGCGACC -0.107544906159  
GCGCGAGA 0.000129599757345  
GCGCGAGC -0.343594164785  
GCGCGATA 0.224297300055  
GCGCGCAA 0.222006087458  
GCGCGCAC -0.193615226184  
GCGCGCCA -0.242786970652  
GCGCGCCC -0.220758311347  
GCGCGCGA 0.0391429384758  
GCGCGCGC 0.140643216828  
GCGCGCTA -0.233107279218  
GCGCGGAA 0.108517608518  
GCGCGGAC -0.0821608476637  
GCGCGGCA -0.0869469325416  
GCGCGGCC 0.108192990574  
GCGCGGGA -0.187119048272  
GCGCGGTA -0.100325540317  
GCGCGTAA 0.119332831454  
GCGCGTAC -0.109780579478  
GCGCGTCA -0.125393241078  
GCGCGTCC -0.259129219291  
GCGCGTGA -0.0147566111691  
GCGCGTTA -0.215376487475  
GCGCTAAA 0.0856765856766  
GCGCTAAC -0.272563614206  
GCGCTACA -0.233588583746  
GCGCTACC -0.157069786249  
GCGCTAGA -0.0914852375636  
GCGCTAGC -0.37406323298  
GCGCTATA 0.00361670912316  
GCGCTCAA 0.157373926118  
GCGCTCAC -0.291205059177  
GCGCTCCA -0.166093320848  
GCGCTCCC -0.0372086742626  
GCGCTCGA -0.206168674566  
GCGCTCTA -0.347183977905  
GCGCTGAA 0.129194974978  
GCGCTGAC -0.196409713433  
GCGCTGCA -0.135072549652  
GCGCTGCC -0.258335656192  
GCGCTGGA -0.0213284910255  
GCGCTGTA -0.0307746234211  
GCGCTTAA 0.0321211944264  
GCGCTTAC -0.161552373942  
GCGCTTCA -0.0709483588271  
GCGCTTCC -0.0776996848713  
GCGCTTGA -0.00899880884433  
GCGCTTTA -0.185948499061  
GCGGAAAA 0.0742105742106  
GCGGAAAC -0.30886589639  
GCGGAAACA -0.239569118802  
GCGGAAACC -0.34259649703



GCGGAAGA -0.069258000215  
GCGGAAGC -0.267951721068  
GCGGAATA 0.053186795611  
GCGGACAA 0.0166529200091  
GCGGACAC -0.150280152461  
GCGGACCA -0.299148635613  
GCGGACCC -0.257512853382  
GCGGACGA -0.175299885876  
GCGGACGC -0.130030797566  
GCGGACTA -0.316879626184  
GCGGAGAA 0.00526630803705  
GCGGAGAC -0.253592744214  
GCGGAGCA -0.126563939222  
GCGGAGCC -0.190819267789  
GCGGAGGA -0.200552934464  
GCGGAGTA -0.0272573881541  
GCGGATAA 0.0915447127568  
GCGGATAC 0.285887816191  
GCGGATCA 0.107047819169  
GCGGATCC 0.274467067871  
GCGGATGA -0.176140020578  
GCGGATTA 0.304535667102  
GCGGCAAA 0.106110284522  
GCGGCAAC -0.306720187269  
GCGGCACA -0.0166022737722  
GCGGCACC -0.238441286654  
GCGGCAGA 0.00342058363754  
GCGGCAGC -0.255945844666  
GCGGCATA 0.0619338908604  
GCGGCCAA -0.179694509344  
GCGGCCAC -0.32420980397  
GCGGCCCA -0.139898501225  
GCGGCCCC -0.197354602363  
GCGGCCGA -0.174403365931  
GCGGCCGC -0.152055413632  
GCGGCCTA -0.279569021505  
GCGGCGAA 0.0338754732694  
GCGGCGAC -0.261103255522  
GCGGCGCA 0.21423691452  
GCGGCGCC -0.146917248898  
GCGGCGGA -0.327517323999  
GCGGCGTA -0.130794293547  
GCGGCTAA -0.0560643003504  
GCGGCTAC -0.155630271099  
GCGGCTCA -0.352762824594  
GCGGCTCC -0.438712176589  
GCGGCTGA -0.272097760797  
GCGGCTTA -0.388277131575  
GCGGAAA -0.049416256599  
GCGGAAAC -0.205447412322  
GCGGACA -0.0860383709778  
GCGGACC -0.23629490714  
GCGGAGA -0.0549940664124  
GCGGAGC -0.330691243477

GCGGGATA 0.158286385559  
GCGGGCAA -0.222492424681  
GCGGGCAC -0.329432341048  
GCGGGCCA -0.298914826116  
GCGGGCCC -0.293548813865  
GCGGGCGA -0.237548141543  
GCGGGCTA -0.160220088068  
GCGGGGAA 0.12309146515  
GCGGGGAC -0.184799544458  
GCGGGGCA -0.0253405230867  
GCGGGGCC -0.0658223691412  
GCGGGGGA -0.112341522093  
GCGGGGTA -0.0466825487423  
GCGGGTAA 0.168045455924  
GCGGGTAC -0.152146824905  
GCGGGTCA -0.196049000393  
GCGGGTCC -0.213685310389  
GCGGGTGA -0.159173198642  
GCGGGTTA -0.102372210828  
GCGGTAAC -0.111008518062  
GCGGTACA -0.13114943955  
GCGGTACC 0.00393257472937  
GCGGTAGA -0.0850840075491  
GCGGTAGC -0.153727371744  
GCGGTATA 0.0549148558791  
GCGGTCAA 0.007344730085  
GCGGTCAC -0.278156775515  
GCGGTCCA -0.394070078109  
GCGGTCCC -0.297593005795  
GCGGTCEA -0.190876511048  
GCGGTCTA -0.196122787138  
GCGGTGAA 0.0257378590712  
GCGGTGAC -0.286805749117  
GCGGTGCA -0.0570929055778  
GCGGTGCC -0.244751208678  
GCGGTGGA -0.23088837172  
GCGGTGTA 0.0804529827814  
GCGGTTAA 0.102674420472  
GCGGTTAC -0.142760641979  
GCGGTTCA -0.0123864278722  
GCGGTTCC -0.223462824659  
GCGGTTGA -0.240757739902  
GCGGTTTA -0.0971557121472  
GCGTAAAA 0.159338401763  
GCGTAAAC -0.156068516283  
GCGTAACA 0.0848851606427  
GCGTAACC 0.0500711663248  
GCGTAAGA 0.0105463590312  
GCGTAAGC -0.251844868413  
GCGTAATA 0.208493974584  
GCGTACAA -0.0163535747078  
GCGTACAC -0.186954097887  
GCGTACCA -0.120384819188

GCGTACCC -0.0348433833282  
GCGTACGA -0.018176629693  
GCGTACGC -0.146040211115  
GCGTACTA 0.0171667773698  
GCGTAGAA 0.0126530075984  
GCGTAGAC -0.185247050067  
GCGTAGCA -0.0339595794141  
GCGTAGCC -0.333592429968  
GCGTAGGA -0.084781697984  
GCGTAGTA 0.119836061984  
GCGTATAA 0.123544009985  
GCGTATAC 0.235789727232  
GCGTATCA 0.190518582575  
GCGTATCC 0.405073611527  
GCGTATGA -0.109926862838  
GCGTATTA 0.159768034277  
GCGTCAAA 0.0457385760416  
GCGTCAAC 0.0302407402812  
GCGTCACA -0.0342725645756  
GCGTCACC -0.180946000711  
GCGTCAGA -0.0244413617619  
GCGTCAGC -0.245035029819  
GCGTCATA -0.10580631998  
GCGTCCAA -0.23677634623  
GCGTCCAC -0.00388677620198  
GCGTCCCA -0.165313098733  
GCGTCCCC -0.204074542793  
GCGTCCGA -0.223286258072  
GCGTCCTA -0.179872550748  
GCGTCGAA -0.130621241822  
GCGTCGAC -0.25399251918  
GCGTCGCA 0.0913724516981  
GCGTCGCC 0.0314218398976  
GCGTCGGA -0.168781042427  
GCGTCGTA -0.153486420005  
GCGTCTAA 0.0649000386853  
GCGTCTAC 0.00885747027437  
GCGTCTCA -0.231422017345  
GCGTCTCC -0.421734145784  
GCGTCTGA -0.0824561454728  
GCGTCTTA -0.0510464116669  
GCGTGAAA 0.15202668233  
GCGTGAAC -0.369970422619  
GCGTGACA -0.191652666625  
GCGTGACC -0.228447401488  
GCGTGAGA -0.0988157862088  
GCGTGAGC -0.256618285573  
GCGTGATA 0.127692824245  
GCGTGCAA -0.0472205934781  
GCGTGCAC -0.193354944167  
GCGTGCCA -0.318868590824  
GCGTGCCC -0.333061475105  
GCGTGCGA -0.096733302421  
GCGTGCTA -0.195795983844

GCGTGGAA 0.0688158123337  
GCGTGGAC -0.167293559589  
GCGTGGCA 0.0335576593213  
GCGTGGCC -0.207466677694  
GCGTGGGA -0.0661554898117  
GCGTGGTA 0.101649598914  
GCGTGTAA 0.0792851251432  
GCGTGTAC -0.129877290635  
GCGTGTCA 0.090388531638  
GCGTGTCC -0.283888434001  
GCGTGTGA -0.146942466373  
GCGTGTTA -0.0185736700888  
GCGTAAA 0.0524535959067  
GCGTTAAC -0.117675276448  
GCGTTACA 0.0605550454035  
GCGTTACC -0.11010926768  
GCGTTAGA -0.119410043652  
GCGTTAGC -0.27924867816  
GCGTTATA 0.0528973818092  
GCGTTCAA -0.102311977793  
GCGTTCAC -0.22306055711  
GCGTTCCA -0.289504656849  
GCGTTCCC -0.149349056976  
GCGTTCGA -0.196028763937  
GCGTTCTA -0.272510299116  
GCGTTGAA -0.0468143033364  
GCGTTGAC -0.194239734884  
GCGTTGCA 0.0669305669306  
GCGTTGCC -0.140020609619  
GCGTTGGA -0.192189222134  
GCGTTGTA -0.0533770685286  
GCGTTTAA -0.0979119741799  
GCGTTTAC 0.0294637830523  
GCGTTTCA 0.143663277446  
GCGTTTCC -0.0813987393603  
GCGTTTGA -0.017321388689  
GCGTTTTA -0.122192440374  
GCTAAAAA 0.0607894395773  
GCTAAAAC -0.237596758349  
GCTAAACA -0.0407157411773  
GCTAAACC -0.201367695264  
GCTAAAGA 0.0242206375043  
GCTAAAGC -0.184651941509  
GCTAAATA 0.139156806785  
GCTAACAA 0.175271344423  
GCTAACAC -0.100012716175  
GCTAACCA -0.0751424797682  
GCTAACCC -0.342133445386  
GCTAACGA -0.0737705560469  
GCTAACTA 0.0209039218119  
GCTAAGAA 0.210521667409  
GCTAAGAC -0.221155600312  
GCTAAGCA -0.146260459373  
GCTAAGCC -0.0823107586004

GCTAAGGA -0.121636933562  
GCTAAGTA -0.0248388884753  
GCTAATAA 0.0449530302256  
GCTAATAC 0.0481704780187  
GCTAATCA -0.142742558201  
GCTAATCC -0.190641809274  
GCTAATGA -0.133747204782  
GCTAATTA -0.104515881346  
GCTACAAA -0.0552454049464  
GCTACAAC 0.0043583528432  
GCTACACA -0.123860482973  
GCTACACC -0.107750123383  
GCTACAGA -0.0188697604497  
GCTACAGC -0.192079466565  
GCTACATA -0.146228794984  
GCTACCAA -0.141641231792  
GCTACCAC -0.212280307464  
GCTACCCA -0.165034666226  
GCTACCCC -0.286259043625  
GCTACCGA -0.0906193310269  
GCTACCTA -0.0558217033557  
GCTACGAA 0.143822741147  
GCTACGAC -0.295651964554  
GCTACGCA -0.339549875756  
GCTACGCC -0.235509650929  
GCTACGGA -0.108593038792  
GCTACGTA -0.147580602912  
GCTACTAA -0.0871302636746  
GCTACTAC -0.237588857742  
GCTACTCA -0.32502294659  
GCTACTCC -0.302938703497  
GCTACTGA -0.143791255059  
GCTACTTA -0.0203311131644  
GCTAGAAA -0.0161953743455  
GCTAGAAC -0.159278274537  
GCTAGACA -0.223837519029  
GCTAGACC -0.368945291126  
GCTAGAGA -0.0549019940735  
GCTAGAGC -0.25800470775  
GCTAGATA 0.201086837515  
GCTAGCAA -0.169618813955  
GCTAGCAC -0.180702922128  
GCTAGCCA -0.15454184552  
GCTAGCCC -0.358118407162  
GCTAGCGA -0.0544181108767  
GCTAGCTA -0.170783802915  
GCTAGGAA 0.133245987314  
GCTAGGAC -0.173839749686  
GCTAGGCA -0.164080888737  
GCTAGGCC -0.393772071255  
GCTAGGGA -0.0806778359807  
GCTAGGTA 0.0615570461961  
GCTAGTAA -0.220110949035  
GCTAGTAC -0.295830153243

GCTAGTCA -0.0252644102684  
GCTAGTCC -0.372891259112  
GCTAGTGA -0.203788235878  
GCTAGTTA 0.0610461084794  
GCTATAAA 0.0536721294297  
GCTATAAC 0.0898026070861  
GCTATACA -0.110635428817  
GCTATACC -0.177718507491  
GCTATAGA -0.0724159877615  
GCTATAGC -0.224786494374  
GCTATATA 0.0914746392415  
GCTATCAA -0.0415410798448  
GCTATCAC -0.0567191381768  
GCTATCCA 0.147374647375  
GCTATCCC -0.0397254074728  
GCTATCGA 0.00711317377984  
GCTATCTA 0.0833551090122  
GCTATGAA 0.185895635567  
GCTATGAC -0.216304254926  
GCTATGCA -0.0964992181877  
GCTATGCC -0.117895933777  
GCTATGGA 0.0250499981059  
GCTATGTA 0.0486643668462  
GCTATTAA 0.0668952703541  
GCTATTAC -0.143955250016  
GCTATTCA -0.143625922526  
GCTATTCC 0.05849433954  
GCTATTGA 0.113687291519  
GCTATTTA -0.0603262670363  
GCTCAAAA 0.0658661416237  
GCTCAAAC -0.0896322744796  
GCTCAACA -0.132667303541  
GCTCAACC -0.15983785401  
GCTCAAGA -0.0545809777793  
GCTCAAGC -0.0427204404503  
GCTCAATA -0.062991844379  
GCTCACAA 0.091839773658  
GCTCACAC -0.247459554595  
GCTCACCA -0.0808102849586  
GCTCACCC -0.268876154565  
GCTCACGA -0.0186010091206  
GCTCACTA -0.0241939708773  
GCTCAGAA -0.137189639027  
GCTCAGAC -0.201664304657  
GCTCAGCA -0.279789811393  
GCTCAGCC -0.236211388165  
GCTCAGGA -0.136471541891  
GCTCAGTA -0.076759773326  
GCTCATAA 0.0405974169496  
GCTCATAC -0.345993985949  
GCTCATCA -0.258266745477  
GCTCATCC -0.212597787496  
GCTCATGA -0.210261384387  
GCTCATT A 0.0781698210988

GCTCCAAA -0.0436815252221  
GCTCCAAC -0.207506570566  
GCTCCACA -0.202703820418  
GCTCCACC -0.393579796913  
GCTCCAGA -0.0526314637211  
GCTCCAGC -0.273988802607  
GCTCCATA -0.181013590081  
GCTCCCAA -0.184611129517  
GCTCCCAC -0.339556547742  
GCTCCCCA -0.185098002729  
GCTCCCCC -0.164228516722  
GCTCCCGA -0.0881557722324  
GCTCCCTA -0.269398066602  
GCTCCGAA -0.20589986559  
GCTCCGAC -0.257460474989  
GCTCCGCA -0.198520025696  
GCTCCGCC -0.132697593507  
GCTCCGGA -0.27776813152  
GCTCCGTA -0.0326569491179  
GCTCCTAA -0.18438786455  
GCTCCTAC -0.371588675823  
GCTCCTCA -0.224905555207  
GCTCCTCC -0.380335008864  
GCTCCTGA -0.21498208513  
GCTCCTTA -0.0697061523932  
GCTCGAAA -0.201262704034  
GCTCGAAC -0.371911024067  
GCTCGACA -0.241049814612  
GCTCGACC -0.336301528773  
GCTCGAGA -0.159309529543  
GCTCGAGC -0.151107858783  
GCTCGATA 0.0954687469839  
GCTCGCAA -0.215811382652  
GCTCGCAC -0.170566924008  
GCTCGCCA -0.246328911437  
GCTCGCCC -0.279961561642  
GCTCGCGA -0.0108527083695  
GCTCGCTA -0.0527534619893  
GCTCGGAA 0.185367473705  
GCTCGGAC -0.142992259793  
GCTCGGCA -0.259347277575  
GCTCGGCC -0.185826986529  
GCTCGGGA -0.0130890052356  
GCTCGGTA 0.0823882671167  
GCTCGTAA -0.0988980693469  
GCTCGTAC -0.359644336417  
GCTCGTCA -0.149739718251  
GCTCGTCC -0.395249856082  
GCTCGTGA -0.143581812217  
GCTCGTTA 0.210490104429  
GCTCTAAA -0.225560668833  
GCTCTAAC -0.289490657506  
GCTCTACA -0.0690862135856  
GCTCTACC -0.283975424409

GCTCTAGA -0.193772012664  
GCTCTATA -0.0972039559846  
GCTCTCAA -0.202999671881  
GCTCTCAC -0.23913519271  
GCTCTCCA -0.220076355151  
GCTCTCCC -0.3429393236  
GCTCTCGA -0.0998525579732  
GCTCTCTA -0.176700441757  
GCTCTGAA -0.0807565748652  
GCTCTGAC -0.291009039111  
GCTCTGCA -0.0949206154583  
GCTCTGCC -0.133892382847  
GCTCTGGA -0.10158045998  
GCTCTGTA -0.0907860087411  
GCTCTTAA 0.0278176390298  
GCTCTTAC -0.238132037333  
GCTCTTCA -0.246135177221  
GCTCTTCC -0.194686409949  
GCTCTTGA -0.137189082176  
GCTCTTTA 0.0216930954331  
GCTGAAAA 0.237728615033  
GCTGAAAC -0.0796406238368  
GCTGAACA -0.18771993327  
GCTGAACC -0.378977556178  
GCTGAAGA -0.0121172529069  
GCTGAAGC -0.343710465607  
GCTGAATA 0.0112936628088  
GCTGACAA -0.0141362433457  
GCTGACAC -0.115242360064  
GCTGACCA -0.223730661292  
GCTGACCC -0.323582271398  
GCTGACGA -0.00482058378328  
GCTGACTA -0.29150448419  
GCTGAGAA 0.233682097923  
GCTGAGAC -0.249747953352  
GCTGAGCA -0.153152606115  
GCTGAGCC -0.270448571916  
GCTGAGGA -0.0289309632718  
GCTGAGTA -0.152959406216  
GCTGATAA 0.185627962379  
GCTGATAC 0.159619132428  
GCTGATCA -0.183271707571  
GCTGATCC 0.0418056538908  
GCTGATGA -0.156139475071  
GCTGATTA 0.185545571995  
GCTGCAA -0.0906422590047  
GCTGCAAC -0.118850622364  
GCTGCACA -0.259368902497  
GCTGCACC -0.238873077923  
GCTGCAGA -0.0555652066013  
GCTGCAGC -0.192630168928  
GCTGCATA -0.286278869291  
GCTGCCAA -0.194342145404  
GCTGCCAC -0.263115388962



GCTGCCCA -0.166004609589  
GCTGCCCC -0.328050145414  
GCTGCCGA -0.106464596342  
GCTGCCTA 0.034772231265  
GCTGCGAA 0.164369393371  
GCTGCGAC -0.308363723569  
GCTGCGCA -0.328466485575  
GCTGCGCC -0.0943846087603  
GCTGCGGA 0.00402797909158  
GCTGCGTA -0.061649804074  
GCTGCTAA -0.107966114756  
GCTGCTAC -0.212207338092  
GCTGCTCA -0.159635207746  
GCTGCTCC -0.26449152519  
GCTGCTGA -0.0371794778217  
GCTGCTTA -0.342557420398  
GCTGGAAA 0.0107476622628  
GCTGGAAC -0.133532400859  
GCTGGACA -0.0997103856804  
GCTGGACC -0.349988838455  
GCTGGAGA -0.0861872654365  
GCTGGATA 0.0994686247746  
GCTGGCAA 0.0310324098203  
GCTGGCAC -0.361952400197  
GCTGGCCA -0.248486904996  
GCTGGCCC -0.224189467417  
GCTGGCGA -0.143593773697  
GCTGGCTA -0.272625398007  
GCTGGGAA 0.176564746757  
GCTGGGAC -0.130713521545  
GCTGGGCA -0.134470772109  
GCTGGGCC -0.36456016164  
GCTGGGGA -0.0690750630914  
GCTGGGTA 0.00624408147805  
GCTGGTAA 0.107739976497  
GCTGGTAC -0.214472367627  
GCTGGTCA -0.26511799715  
GCTGGTCC -0.231080183361  
GCTGGTGA -0.136068995371  
GCTGGTTA -0.0319663264964  
GCTGTAAA -0.055916798341  
GCTGTAAAC -0.0367327722751  
GCTGTACA -0.173124444438  
GCTGTACC -0.195871070197  
GCTGTAGA -0.0741268142863  
GCTGTATA 0.0204736416858  
GCTGTCAA -0.0185395497256  
GCTGTCAC -0.166361639557  
GCTGTCCA -0.0143157449107  
GCTGTCCC -0.315549877199  
GCTGTCGA 0.015978482223  
GCTGTCTA -0.174181198248  
GCTGTGAA 0.22750377729  
GCTGTGAC -0.0708341542795

GCTGTGCA 0.0612341269893  
GCTGTGCC -0.135672117749  
GCTGTGGA -0.0343405267845  
GCTGTGTA -0.110073523938  
GCTGTTAA 0.09467456917  
GCTGTTAC -0.301279984124  
GCTGTTCA -0.298961356852  
GCTGTTCC 0.0213091879759  
GCTGTTGA -0.0492865119742  
GCTGTTTA -0.119547827359  
GCTTAAAA 0.110166389558  
GCTTAAAC -0.0548987978365  
GCTTAAACA -0.228054142717  
GCTTAAACC -0.123424924617  
GCTTAAAGA 0.0567835293534  
GCTTAAAGC -0.11882122728  
GCTTAAATA 0.0728676334737  
GCTTACAA 0.131233161536  
GCTTACAC -0.297525627138  
GCTTACCA 0.033696677172  
GCTTACCC -0.243639624704  
GCTTACGA -0.160347864923  
GCTTACTA -0.0328902564442  
GCTTAGAA 0.0385414917922  
GCTTAGAC -0.217844358215  
GCTTAGCA -0.135635797107  
GCTTAGCC -0.0732159305393  
GCTTAGGA -0.0974175747976  
GCTTAGTA -0.0949192885778  
GCTTATAA 0.174458223543  
GCTTATAC -0.0698646304707  
GCTTATCA -0.0347916718366  
GCTTATCC -0.00916549272644  
GCTTATGA -0.0798398302772  
GCTTATTA 0.106278454763  
GCTTCAA -0.049649277753  
GCTTCAAC -0.13422973312  
GCTTCACA -0.13854220943  
GCTTCACC -0.227683060125  
GCTTCAGA -0.0624136053588  
GCTTCATA -0.196836383383  
GCTTCCAA -0.25574479885  
GCTTCCAC -0.261759379118  
GCTTCCCA -0.169912988645  
GCTTCCCC -0.259961884583  
GCTTCCGA -0.0692167324803  
GCTTCCTA -0.197657626362  
GCTTCGAA -0.00536411611425  
GCTTCGAC -0.209577521931  
GCTTCGCA -0.184959097414  
GCTTCGCC -0.058457880286  
GCTTCGGA -0.176175091604  
GCTTCGTA -0.188443264201  
GCTTCTAA -0.0100334494274

GCTTCTAC -0.0753792794384  
GCTTCTCA -0.0703994110982  
GCTTCTCC -0.344820164565  
GCTTCTGA -0.17776206114  
GCTTCTTA -0.100972436916  
GCTTGAAA -0.143030590399  
GCTTGAAAC -0.0468295520652  
GCTTGACA -0.0999635044488  
GCTTGACC -0.186173335649  
GCTTGAGA -0.0812068675539  
GCTTGATA -0.0136541500178  
GCTTGCAA 0.0231530883192  
GCTTGCAC -0.257402745244  
GCTTGCCA -0.349180757093  
GCTTGCCC -0.295191515282  
GCTTGCGA 0.00185607160948  
GCTTGCTA -0.184931806738  
GCTTGCAA -0.0281198221937  
GCTTGGAC -0.176589563732  
GCTTGGCA -0.284508422437  
GCTTGGCC -0.303252229469  
GCTTGGGA -0.0663716351849  
GCTTGGTA -0.13085794795  
GCTTGTAA -0.00376415114997  
GCTTGTAC -0.238090807592  
GCTTGTCA 0.00988810464004  
GCTTGTCC -0.245897416062  
GCTTGTGA -0.0406983278139  
GCTTGTTA -0.0913426144213  
GCTTTAAA -0.0618377298558  
GCTTTAAC -0.0783237512236  
GCTTTACA -0.0772111235196  
GCTTTACC -0.208326095767  
GCTTTAGA -0.0106457522828  
GCTTTATA 0.0984580597208  
GCTTTCAA -0.0159974599096  
GCTTTCAC -0.137544013478  
GCTTTCCA -0.178609426651  
GCTTTCCC -0.343034631687  
GCTTTCGA -0.0575459757278  
GCTTTCTA -0.136727881871  
GCTTTGAA -0.161426425703  
GCTTTGAC -0.0590271644802  
GCTTTGCA -0.0650927351956  
GCTTTGCC -0.0973025366965  
GCTTTGGA -0.147041714568  
GCTTTGTA -0.147002715406  
GCTTTTAA 0.129549659853  
GCTTTTAC -0.0942576741237  
GCTTTTCA 0.127018202776  
GCTTTTCC -0.0570156209069  
GCTTTTGA -0.0589494323533  
GCTTTTTA -0.0628751844039  
GGAAAAAA -0.0214473811198

GGAAAAAC -0.0764421393376  
GGAAAACA -0.0244781370368  
GGAAAACC -0.20575856636  
GGAAAAGA -0.00658744699021  
GGAAAATA 0.254044966127  
GGAAACAA -0.029997153347  
GGAAACAC 0.106113000052  
GGAAACCA -0.111911257468  
GGAAACCC -0.370266894125  
GGAAACGA 0.0209156003883  
GGAAACTA -0.0670503565615  
GGAAAGAA -0.0801121120127  
GGAAAGAC -0.236993489996  
GGAAAGCA -0.0883644755453  
GGAAAGCC -0.347839625856  
GGAAAGGA -0.2568399895  
GGAAAGTA -0.0350125459251  
GGAAATAA 0.176916223944  
GGAAATAC 0.210371305738  
GGAAATCA 0.444710699766  
GGAAATCC 0.4905277178  
GGAAATGA -0.190617862329  
GGAAATTA 0.253552841909  
GGAACAAA -0.223053549616  
GGAACAAC -0.0959635920381  
GGAACACA -0.150870418896  
GGAACACC -0.257159053932  
GGAACAGA 0.110497549891  
GGAACATA -0.0488376166945  
GGAACCAA -0.134353163058  
GGAACCAC -0.174231256049  
GGAACCCA -0.259891935106  
GGAACCCC -0.27360921631  
GGAACCGA -0.227513007436  
GGAACCTA -0.270750365194  
GGAACGAA -0.155554760921  
GGAACGAC -0.289727135655  
GGAACGCA -0.160118881701  
GGAACGCC -0.32668689949  
GGAACGGA -0.197842451207  
GGAACGTA -0.138490000744  
GGAACTAA -0.16083749199  
GGAACTAC -0.146470161622  
GGAACTCA -0.161922976967  
GGAACTCC -0.314010920106  
GGAACTGA -0.125629303311  
GGAACTTA -0.0357254950622  
GGAAGAAA -0.0816672319141  
GGAAGAAC -0.313842959227  
GGAAGACA -0.0713299340631  
GGAAGACC -0.360312499139  
GGAAGAGA 0.0110705604987  
GGAAGATA 0.160769472201  
GGAAGCAA -0.180124527294

GGAAGCAC -0.179943372958  
GGAAGCCA -0.282039301948  
GGAAGCCC -0.25884856353  
GGAAGCGA -0.205588957834  
GGAAGCTA -0.291399807672  
GGAAGGAA -0.0505283587933  
GGAAGGAC -0.345428184752  
GGAAGGCA -0.331241126421  
GGAAGGCC -0.236411897497  
GGAAGGGA -0.333358382422  
GGAAGGTA -0.124344455035  
GGAAGTAA 0.055373240002  
GGAAGTAC -0.111188319477  
GGAAGTCA -0.180066146003  
GGAAGTCC -0.3672250749  
GGAAGTGA 0.105225059771  
GGAAGTTA -0.205115163545  
GGAATAAA 0.0408129748984  
GGAATAAC 0.109339941461  
GGAATACA 0.0613555907535  
GGAATACC -0.040831952585  
GGAATAGA 0.0719845550827  
GGAATATA 0.249246366868  
GGAATCAA 0.35828047561  
GGAATCAC 0.328715537137  
GGAATCCA 0.450843405389  
GGAATCCC 0.405017965624  
GGAATCGA 0.347754951151  
GGAATCTA 0.468725959749  
GGAATGAA -0.158184641293  
GGAATGAC -0.125707558224  
GGAATGCA 0.07501027198  
GGAATGCC -0.263738394894  
GGAATGGA 0.0923563717583  
GGAATGTA -0.0568047386229  
GGAATTAA 0.152857236703  
GGAATTAC 0.209392138373  
GGAATTCA -0.00278607037802  
GGAATTCC 0.096338286735  
GGAATTGA 0.140542177909  
GGAATTTA 0.172027619833  
GGACAAAA 0.220245542068  
GGACAAAC -0.283857634839  
GGACAACA 0.0370962679649  
GGACAACC -0.210261627667  
GGACAAGA 0.122368925399  
GGACAATA -0.0260255105839  
GGACACAA -0.0493086239186  
GGACACAC 0.00293790825344  
GGACACCA -0.266340477389  
GGACACCC -0.089611701359  
GGACACGA 0.0726896491318  
GGACACTA -0.212840712239  
GGACAGAA 0.0830216010323

GGACAGAC -0.232714104144  
GGACAGCA -0.170550289338  
GGACAGCC -0.34987488236  
GGACAGGA -0.107809762922  
GGACAGTA -0.0528230665089  
GGACATAA -0.257976646882  
GGACATAC -0.0179358659421  
GGACATCA -0.161270191164  
GGACATCC -0.164434658909  
GGACATGA -0.0816101483396  
GGACATTA 0.00781953679846  
GGACCAAA -0.00247216913884  
GGACCAAC -0.107239774089  
GGACCACA -0.128859915551  
GGACCACC -0.380153513305  
GGACCAGA -0.113747918342  
GGACCATA -0.126744045178  
GGACCCAA -0.236439120719  
GGACCCAC -0.196806413639  
GGACCCCA -0.288656160571  
GGACCCCC -0.379401105186  
GGACCCGA -0.0378998436608  
GGACCCTA -0.277177631973  
GGACCGAA -0.188290456226  
GGACCGAC -0.272157898654  
GGACCGCA -0.282609330105  
GGACCGCC -0.341384803212  
GGACCGGA -0.139896543218  
GGACCGTA -0.246227515197  
GGACCTAA -0.218908032137  
GGACCTAC -0.147174115137  
GGACCTCA -0.384295000401  
GGACCTCC -0.411358347134  
GGACCTGA -0.271968199623  
GGACCTTA -0.179761835833  
GGACGAAA -0.094138521478  
GGACGAAC -0.201339981221  
GGACGACA -0.211376032437  
GGACGACC -0.414042748123  
GGACGAGA -0.118921349708  
GGACGATA 0.0567133566418  
GGACGCAA 0.0539110863207  
GGACGCAC -0.220433152294  
GGACGCCA -0.314304814677  
GGACGCCC -0.395517074857  
GGACGCGA -0.047199696357  
GGACGCTA -0.301888560851  
GGACGGAA 0.00500638379426  
GGACGGAC -0.320679256121  
GGACGGCA -0.138576442858  
GGACGGCC -0.402561356876  
GGACGGGA -0.12658317439  
GGACGGTA 0.00964091619724  
GGACGTAA -0.082874931412

GGACGTAC -0.139292124701  
GGACGTCA -0.190922147089  
GGACGTCC -0.237188422332  
GGACGTGA -0.0679758837398  
GGACGTTA -0.283334051648  
GGACTAAA -0.00146412884334  
GGACTAAC -0.22734252638  
GGACTACA -0.312351157252  
GGACTACC -0.2469492614  
GGACTAGA 0.0924760771662  
GGACTATA -0.174582103008  
GGACTCAA -0.264612229032  
GGACTCAC -0.0680799909565  
GGACTCCA -0.244486900617  
GGACTCCC -0.246988637441  
GGACTCGA -0.131347601045  
GGACTCTA -0.190509033212  
GGACTGAA -0.194783327436  
GGACTGAC -0.271659173456  
GGACTGCA -0.245039141007  
GGACTGCC -0.323970950983  
GGACTGGA -0.171773813364  
GGACTGTA -0.255067358027  
GGACTTAA -0.121093933102  
GGACTTAC -0.116109136296  
GGACTTCA -0.260527752277  
GGACTTGA 0.109427530784  
GGACTTTA -0.328734139881  
GGAGAAAA -0.0625708352981  
GGAGAAAC -0.107923824964  
GGAGAACA -0.057544122391  
GGAGAACC -0.15390787199  
GGAGAAGA -0.176080993535  
GGAGAATA 0.220044086626  
GGAGACAA -0.261308259813  
GGAGACAC -0.0117440504256  
GGAGACCA -0.106085373881  
GGAGACCC -0.304807933476  
GGAGACGA -0.0649225166878  
GGAGACTA -0.242547642987  
GGAGAGAA -0.101773127802  
GGAGAGAC -0.372171923877  
GGAGAGCA -0.187359969173  
GGAGAGCC -0.204575341786  
GGAGAGGA -0.279759254496  
GGAGAGTA -0.133259540637  
GGAGATAA 0.0537464942543  
GGAGATAC 0.22712933319  
GGAGATCA 0.310544209246  
GGAGATCC 0.388092961468  
GGAGATGA 0.0152310533346  
GGAGATTA 0.364125603089  
GGAGCAAA -0.178552154926  
GGAGCAAC -0.269909210965

GGAGCACA -0.115008430472  
GGAGCACC -0.341189165999  
GGAGCAGA -0.0863739511902  
GGAGCATA 0.0881473760262  
GGAGCCAA -0.0356087092983  
GGAGCCAC -0.236733731921  
GGAGCCCA -0.383943114639  
GGAGCCCC -0.428932975133  
GGAGCCGA -0.100035785138  
GGAGCCTA -0.162506719596  
GGAGCGAA -0.0962851762708  
GGAGCGAC -0.170197722593  
GGAGCGCA -0.0391700240185  
GGAGCGCC -0.316527965655  
GGAGCGGA -0.0743226663799  
GGAGCGTA 0.0705612285862  
GGAGCTAA -0.284938922841  
GGAGCTAC -0.26075571257  
GGAGCTCA -0.273712809677  
GGAGCTCC -0.398522210925  
GGAGCTGA -0.220547733273  
GGAGCTTA -0.103267179025  
GGAGGAAA -0.0104136056661  
GGAGGAAC -0.298658531068  
GGAGGACA -0.335805778882  
GGAGGACC -0.401236252001  
GGAGGAGA -0.0520933539061  
GGAGGATA 0.27472789594  
GGAGGCAA -0.146333363987  
GGAGGCAC -0.268586738111  
GGAGGCCA -0.35826724991  
GGAGGCCC -0.328657886251  
GGAGGCGA -0.0937867873084  
GGAGGCTA -0.290005131667  
GGAGGGAA -0.155226135706  
GGAGGGAC -0.0910657326309  
GGAGGGCA -0.268784465487  
GGAGGGCC -0.360537215705  
GGAGGGGA -0.121324390856  
GGAGGGTA -0.0199360597943  
GGAGGTAA -0.00924386430752  
GGAGGTAC -0.280667003008  
GGAGGTCA -0.288936091965  
GGAGGTGA -0.189571920483  
GGAGGTTA -0.137233736642  
GGAGTAAA -0.0675805837258  
GGAGTAAC -0.241212663397  
GGAGTACA -0.192299271511  
GGAGTACC -0.241909119435  
GGAGTAGA -0.00714509901243  
GGAGTATA 0.132279585119  
GGAGTCAA -0.174850231363  
GGAGTCAC -0.00359424659288  
GGAGTCCA -0.231608251786



GGAGTCCC -0.342633248713  
GGAGTCGA 0.0495633374421  
GGAGTCTA -0.220428690172  
GGAGTGAA -0.134701343883  
GGAGTGAC -0.276531723387  
GGAGTGCA -0.105059127467  
GGAGTGCC -0.197665765386  
GGAGTGGA -0.0511660933137  
GGAGTGTA -0.0766041523617  
GGAGTTAA -0.133502339341  
GGAGTTAC -0.0580967565824  
GGAGTTCA -0.180337810914  
GGAGTTGA 0.0272241938909  
GGAGTTTA -0.141129909198  
GGATAAAA -5.27334541033E-5  
GGATAAAC -0.0178075581476  
GGATAACA 0.104354635814  
GGATAACC -0.0653420412262  
GGATAAGA 0.0385523264311  
GGATAATA 0.231555246707  
GGATACAA -0.0158850310365  
GGATACAC 0.161286630984  
GGATACCA 0.158906739268  
GGATACCC 0.274286683378  
GGATACGA 0.323498755502  
GGATACTA 0.100213134019  
GGATAGAA 0.00232611097892  
GGATAGAC -0.123635384326  
GGATAGCA -0.0594154872521  
GGATAGCC 0.0949778980082  
GGATAGGA -0.0944797929594  
GGATAGTA 0.000599256950578  
GGATATAA 0.194257789975  
GGATATAC 0.177164768074  
GGATATCA 0.4061761486  
GGATATCC 0.48066698089  
GGATATGA 0.293209187149  
GGATATTA 0.291314730709  
GGATCAAA -0.126533846994  
GGATCAAC -0.133616656668  
GGATCACA 0.213492405276  
GGATCACC 0.105551194011  
GGATCAGA 0.0564372037621  
GGATCATA 0.128457658761  
GGATCCAA 0.122799397541  
GGATCCAC 0.221445515792  
GGATCCCA 0.121024357131  
GGATCCCC 0.376054336282  
GGATCCGA 0.212496806639  
GGATCCTA 0.286787150646  
GGATCGAA 0.0914840460295  
GGATCGAC -0.193358727935  
GGATCGCA 0.336669270016  
GGATCGCC 0.194503040079

GGATCGGA -0.100051842476  
GGATCGTA 0.226434423404  
GGATCTAA 0.191212601184  
GGATCTAC 0.204371437122  
GGATCTCA 0.359426920033  
GGATCTGA 0.218657255681  
GGATCTTA 0.298310985891  
GGATGAAA 0.00448945987805  
GGATGAAC -0.293838209578  
GGATGACA 0.00482252213455  
GGATGACC -0.357339845124  
GGATGAGA 0.045361780399  
GGATGATA 0.202158349257  
GGATGCAA -0.0992877835913  
GGATGCAC -0.211419183153  
GGATGCCA -0.201978297832  
GGATGCCC -0.268318224742  
GGATGCGA -0.0725392874609  
GGATGCTA -0.170058319891  
GGATGGAA 0.0152682508842  
GGATGGAC -0.416467407875  
GGATGGCA -0.0920984843509  
GGATGGCC -0.355956850973  
GGATGGGA -0.0774822240419  
GGATGGTA 0.0193843981723  
GGATGTAA 0.0766841221387  
GGATGTAC -0.158911362038  
GGATGTCA 0.0720899963324  
GGATGTGA 0.00884871134209  
GGATGTTA 0.00982971175814  
GGATTAAC -0.12312341018  
GGATTAAC -0.194692178201  
GGATTACA 0.457980742983  
GGATTACC 0.434529900805  
GGATTAGA 0.0706196214681  
GGATTATA 0.242588318346  
GGATTCAA 0.132958026897  
GGATTCAC 0.205260317145  
GGATTCCA 0.386892402044  
GGATTCCC 0.483731743101  
GGATTCGA 0.265655462625  
GGATTCTA 0.404545155945  
GGATTGAA -0.166109584202  
GGATTGAC -0.185229971203  
GGATTGCA 0.420797453905  
GGATTGCC 0.42163675248  
GGATTGGA 0.0306601367207  
GGATTGTA 0.250580644219  
GGATTTAA 0.178400165115  
GGATTTAC 0.283730283278  
GGATTTCA 0.458246169792  
GGATTTGA 0.333060589914  
GGATTTTA 0.386489689059  
GGCAAAAA 0.119605677842

GGCAAAAC -0.0908745982135  
GGCAAACA -0.00715177987905  
GGCAAACC -0.18351759014  
GGCAAAGA 0.0352463838353  
GGCAAATA 0.253893059571  
GGCAACAA 0.0408852378549  
GGCAACAC -0.139582557995  
GGCAACCA -0.103504920813  
GGCAACCC -0.160497253806  
GGCAACGA -0.157054754678  
GGCAACTA 0.0349590884871  
GGCAAGAA -0.0180221543858  
GGCAAGAC -0.195899152158  
GGCAAGCA -0.240915318057  
GGCAAGCC -0.466113340657  
GGCAAGGA -0.127219065422  
GGCAAGTA 0.115850747794  
GGCAATAA 0.0163535747078  
GGCAATAC -0.0405595346486  
GGCAATCA 0.36324970986  
GGCAATGA 0.0610734701644  
GGCAATTA 0.0423896416726  
GGCACAAA 0.00362546805544  
GGCACAAC -0.230748559191  
GGCACACA 0.0451705148675  
GGCACACC -0.290751903947  
GGCACAGA 0.022913927003  
GGCACATA 0.110878593899  
GGCACCAA -0.192549768834  
GGCACCCAC -0.177848075094  
GGCACCCA -0.287091937009  
GGCACCCC -0.195877785512  
GGCACCGA -0.0814688910394  
GGCACCTA -0.212567158172  
GGCACGAA -0.118056457628  
GGCACGAC -0.213123833402  
GGCACGCA -0.194851775578  
GGCACGCC -0.333443489755  
GGCACGGA -0.0124017414273  
GGCACGTA -0.13088631395  
GGCACTAA -0.147543412293  
GGCACTAC -0.28805492278  
GGCACTCA -0.178297192882  
GGCACTGA -0.156192123295  
GGCACTTA -0.183980611573  
GGCAGAAA 0.027455603162  
GGCAGAAC -0.178789332495  
GGCAGACA -0.104903347478  
GGCAGACC -0.243147730061  
GGCAGAGA -0.0875899226025  
GGCAGATA 0.220338970679  
GGCAGCAA -0.113797351401  
GGCAGCAC -0.144642015431  
GGCAGCCA 0.0245327972601

GGCAGCCC -0.189249523098  
GGCAGCGA -0.18884838278  
GGCAGCTA -0.0683544913536  
GGCAGGAA -0.149122499763  
GGCAGGAC -0.28858319482  
GGCAGGCA -0.204948344982  
GGCAGGCC -0.43060687979  
GGCAGGGA -0.173895626871  
GGCAGGTA -0.164528376802  
GGCAGTAA -0.0890868582339  
GGCAGTAC -0.00296095509595  
GGCAGTCA -0.0597015687929  
GGCAGTGA -0.160035997425  
GGCAGTTA 0.015610607067  
GGCATAAA -0.00369352434722  
GGCATAAC -0.212841423841  
GGCATAACA -0.025007481588  
GGCATAACC -0.304288189525  
GGCATAGA -0.0227990217568  
GGCATATA 0.12675561849  
GGCATCAA -0.183664833423  
GGCATCAC -0.0295884031737  
GGCATCCA -0.104123753981  
GGCATCCC -0.1710216119  
GGCATCGA -0.136692006298  
GGCATCTA 0.145866117302  
GGCATGAA 0.112756006695  
GGCATGAC -0.271571618898  
GGCATGCA -0.0650238158146  
GGCATGCC -0.285218069437  
GGCATGGA -0.00807062619067  
GGCATGTA 0.0146952986431  
GGCATTAA 0.0738399889054  
GGCATTAC -0.209544868137  
GGCATTCA -0.125074933295  
GGCATTGA -0.175036597772  
GGCATTTA -0.000172988912652  
GGCCAAAA -0.0728245554535  
GGCCAAAC -0.30841386737  
GGCCAACA 0.0473228048986  
GGCCAACC -0.197039628775  
GGCCAAGA -0.0498060043515  
GGCCAATA -0.0489938176536  
GGCCACAA -0.0429786774377  
GGCCACAC -0.175772236695  
GGCCACCA -0.170083896021  
GGCCACCC -0.315386837923  
GGCCACGA -0.20104861852  
GGCCACTA -0.214809347788  
GGCCAGAA -0.0036179893701  
GGCCAGAC -0.243623589748  
GGCCAGCA -0.216171802469  
GGCCAGCC -0.26452784592  
GGCCAGGA -0.163169893291

GGCCAGTA -0.263179438835  
GGCCATAA -0.0739370063799  
GGCCATAC -0.112152011017  
GGCCATCA -0.118393100881  
GGCCATGA -0.124940373284  
GGCCATTA -0.168193488964  
GGCCCAAA -0.252114077751  
GGCCCAAC -0.30962854552  
GGCCCACA -0.0690293687021  
GGCCCACC -0.33151757615  
GGCCCAGA -0.0527105935762  
GGCCCATA -0.167730430468  
GGCCCAA -0.158716383792  
GGCCCCAC -0.281069664626  
GGCCCCCA -0.251935224515  
GGCCCCCC -0.173751059199  
GGCCCCGA -0.106309741418  
GGCCCCCTA -0.292587707074  
GGCCCGAA -0.0560318968651  
GGCCCGAC -0.331426694854  
GGCCCGCA -0.0868632656904  
GGCCCGCC -0.327730779727  
GGCCCGGA -0.239572910378  
GGCCCGTA -0.20530781515  
GGCCCTAA -0.218274626561  
GGCCCTAC -0.085389488616  
GGCCCTCA -0.245052311743  
GGCCCTGA -0.136214170493  
GGCCCTTA -0.170958208252  
GGCCGAAA 0.138086757224  
GGCCGAAC -0.074518336104  
GGCCGACA -0.119171767275  
GGCCGACC -0.373036601469  
GGCCGAGA -0.082304220397  
GGCCGATA 0.0444011504618  
GGCCGCAA -0.222488151071  
GGCCGCAC -0.299769305187  
GGCCGCCA 0.0610603736296  
GGCCGCCC -0.287575213824  
GGCCGCGA -0.222100942946  
GGCCGCTA -0.241135026041  
GGCCGGAA 0.0333078363737  
GGCCGGAC -0.418851922047  
GGCCGGCA -0.10934824951  
GGCCGGCC -0.0505792176221  
GGCCGGGA -0.186055115226  
GGCCGGTA -0.238599064486  
GGCCGTAA -0.160416596738  
GGCCGTAC -0.163047044067  
GGCCGTCA -0.00061379424099  
GGCCGTGA -0.0788906259909  
GGCCGTTA -0.301472229802  
GGCCTAAA -0.154432669584  
GGCCTAAC -0.338212067839

GGCCTACA -0.270908815538  
GGCCTACC -0.350589840302  
GGCCTAGA -0.294531321819  
GGCCTATA -0.189552296421  
GGCCTCAA -0.189103915974  
GGCCTCAC -0.273684602218  
GGCCTCCA -0.308057878009  
GGCCTCCC -0.186910316264  
GGCCTCGA -0.265920963762  
GGCCTCTA -0.311695398735  
GGCCTGAA -0.124341535825  
GGCCTGAC -0.272136714469  
GGCCTGCA -0.374647549591  
GGCCTGGA -0.128545710686  
GGCCTGTA -0.162616185931  
GGCCTTAA -0.117806056621  
GGCCTTAC -0.138037454517  
GGCCTTCA -0.215900774059  
GGCCTTGA -0.0895056367501  
GGCCTTTA -0.291469851318  
GGCGAAAA -0.0457585538889  
GGCGAAAC -0.0607536797647  
GGCGAACA -0.0341868426239  
GGCGAACC -0.331031555037  
GGCGAAGA 0.147733261315  
GGCGAATA 0.205200616045  
GGCGACAA -0.150666026972  
GGCGACAC -0.0859132252026  
GGCGACCA -0.245149725854  
GGCGACCC -0.340522065207  
GGCGACGA 0.00769226526802  
GGCGACTA -0.481883309224  
GGCGAGAA -0.0993769728046  
GGCGAGAC -0.225557814363  
GGCGAGCA -0.174809962199  
GGCGAGCC -0.359729965958  
GGCGAGGA -0.015911027289  
GGCGAGTA -0.18691667214  
GGCGATAA 0.0439300692359  
GGCGATAC -0.0157697276702  
GGCGATCA 0.184386473289  
GGCGATGA -0.00748470385168  
GGCGATTA 0.105564241928  
GGCGCAAA 0.0713399349763  
GGCGCAAC 0.0244834054729  
GGCGCACA -0.2304992404  
GGCGCACC -0.274676887202  
GGCGCAGA 0.243525895041  
GGCGCATA 0.159201623322  
GGCGCCAA -0.127089910049  
GGCGCCAC -0.109491435708  
GGCGCCCA -0.0469137334381  
GGCGCCCC -0.139462898189  
GGCGCCGA -0.112419225116

GGCGCCTA -0.251508261331  
GGCGCGAA -0.157120839056  
GGCGCGAC -0.105849506945  
GGCGCGCA -0.199808326924  
GGCGCGCC -0.185679557463  
GGCGCGGA 0.0252719526823  
GGCGCGTA -0.107675769248  
GGCGCTAA -0.1703398229  
GGCGCTAC -0.0950932959712  
GGCGCTCA -0.0733870456306  
GGCGCTGA -0.150701635325  
GGCGCTTA -0.164753097143  
GGCGGAAA -0.0160256675408  
GGCGGAAC -0.376781829245  
GGCGGACA -0.190741246171  
GGCGGACC -0.336697621981  
GGCGGAGA 0.0914555017232  
GGCGGATA 0.17169770005  
GGCGGCAA -0.143134141233  
GGCGGCAC -0.0531037845049  
GGCGGCCA -0.19088478132  
GGCGGCCC -0.210510503061  
GGCGGCGA 0.0355268382262  
GGCGGCTA -0.371855508424  
GGCGGGAA -0.0646758144959  
GGCGGGAC -0.15897329972  
GGCGGGCA -0.156045163767  
GGCGGGGA -0.201361619292  
GGCGGGTA 0.00190296285268  
GGCGGTAA 0.0239344027223  
GGCGGTAC -0.112086544076  
GGCGGTCA -0.0647042928478  
GGCGGTGA -0.0543011686475  
GGCGGTTA -0.112433107532  
GGCGTAAA 0.0115873375036  
GGCGTAAC -0.0861478521974  
GGCGTACA -0.19134980725  
GGCGTACC -0.255078132537  
GGCGTAGA 0.0448864842804  
GGCGTATA -0.0290906197951  
GGCGTCAA -0.194981322968  
GGCGTCAC -0.269405636495  
GGCGTCCA -0.231938256236  
GGCGTCCC -0.219840501926  
GGCGTCGA -0.228835598546  
GGCGTCTA -0.195503728515  
GGCGTGAA -0.0868473954598  
GGCGTGAC -0.239996760321  
GGCGTGCA -0.261123441711  
GGCGTGGA 0.0998919029222  
GGCGTGTA -0.186068310327  
GGCGTTAA -0.0732123307881  
GGCGTTAC -0.0345413247811  
GGCGTTCA -0.213703893405

GGCGTTGA -0.0734816049655  
GGCGTTTA -0.0299941180849  
GGCTAAAA -0.102639481979  
GGCTAAAC -0.210672213538  
GGCTAACA 0.0259373882324  
GGCTAACC -0.222097456978  
GGCTAAGA 0.15352956262  
GGCTAATA -0.0966146726714  
GGCTACAA -0.0585031143758  
GGCTACAC -0.0265110982971  
GGCTACCA -0.129383010493  
GGCTACCC -0.223741120236  
GGCTACGA -0.0281169025496  
GGCTACTA -0.318477513801  
GGCTAGAA -0.0993054856127  
GGCTAGAC -0.276267461662  
GGCTAGCA -0.288412497553  
GGCTAGCC -0.307723022742  
GGCTAGGA -0.161228666053  
GGCTAGTA -0.265600405775  
GGCTATAA 0.0076150530696  
GGCTATAC -0.193252836014  
GGCTATCA -0.086340786829  
GGCTATGA -0.0938848054422  
GGCTATTA -0.164502287703  
GGCTCAAA -0.0711914899207  
GGCTCAAC -0.341683408153  
GGCTCACA -0.150078595813  
GGCTCACC -0.313307862158  
GGCTCAGA -0.0181192461351  
GGCTCATA -0.0995950914636  
GGCTCCAA -0.165223432499  
GGCTCCAC -0.126668265665  
GGCTCCCA -0.282808348205  
GGCTCCCC -0.397754413917  
GGCTCCGA -0.300382905265  
GGCTCCTA -0.258141041296  
GGCTCGAA 0.0185351704769  
GGCTCGAC -0.388113173687  
GGCTCGCA -0.271991917989  
GGCTCGGA -0.0867200099243  
GGCTCGTA -0.291198925798  
GGCTCTAA -0.0712988815604  
GGCTCTAC -0.30541089504  
GGCTCTCA -0.210232488897  
GGCTCTGA -0.282469313443  
GGCTCTTA -0.0790578484167  
GGCTGAAA -0.111765581645  
GGCTGAAC -0.181467697694  
GGCTGACA 0.0775457928568  
GGCTGACC -0.354147061012  
GGCTGAGA -0.0211055665102  
GGCTGATA 0.128586235338  
GGCTGCAA -0.198841219821



GGCTGCAC -0.0924057987093  
GGCTGCCA -0.145849358577  
GGCTGCCC -0.193093106241  
GGCTGCGA -0.134444919627  
GGCTGCTA -0.199656606136  
GGCTGGAA -0.207518082767  
GGCTGGAC -0.34662338553  
GGCTGGCA -0.125505130477  
GGCTGGGA -0.0557760961557  
GGCTGGTA -0.243050903527  
GGCTGTAA -0.109434829894  
GGCTGTAC -0.108104893033  
GGCTGTCA -0.203979311724  
GGCTGTGA -0.0958880016114  
GGCTGTTA -0.208494656453  
GGCTTAAA -0.026998678861  
GGCTTAAC -0.244868904019  
GGCTTACA -0.324529042558  
GGCTTACC -0.260209977866  
GGCTTAGA 0.119967074513  
GGCTTATA 0.00293059276074  
GGCTTCAA -0.235040901362  
GGCTTCAC -0.287178645183  
GGCTTCCA -0.273569761825  
GGCTTCCC -0.334636956192  
GGCTTCGA -0.218118381402  
GGCTTCTA -0.17719371471  
GGCTTGAA -0.201548624379  
GGCTTGAC -0.0969759991827  
GGCTTGCA -0.230056538291  
GGCTTGGA -0.104504230664  
GGCTTGTA -0.262911419271  
GGCTTTAA -0.195841914593  
GGCTTTAC -0.282481484238  
GGCTTTCA -0.160157316196  
GGCTTTGA -0.043097596403  
GGCTTTTA -0.225324807042  
GGGAAAAA -0.111452611419  
GGGAAAAC -0.178141208587  
GGGAAACA 0.17280779402  
GGGAAACC -0.139193840166  
GGGAAAGA -0.140151288448  
GGGAAATA 0.20124118609  
GGGAACAA -0.154172536368  
GGGAACAC -0.186433120182  
GGGAACCA -0.240474240958  
GGGAACCC -0.305444618086  
GGGAACGA -0.124275380831  
GGGAACTA -0.139165565718  
GGGAAGAA -0.101592927489  
GGGAAGAC -0.317209745506  
GGGAAGCA -0.241521212112  
GGGAAGGA -0.264809038002  
GGGAAGTA -0.120710495391

GGGAATAA 0.125330832172  
GGGAATAC 0.0947066852551  
GGGAATCA 0.447440553501  
GGGAATGA -0.1413130085  
GGGAATTA 0.0026651996349  
GGGACAAA -0.0194864285773  
GGGACAAC -0.278874318615  
GGGACACA 0.0415829052193  
GGGACACC -0.231013004601  
GGGACAGA -0.225712509431  
GGGACATA -0.0811332100515  
GGGACCAA -0.0511236980212  
GGGACCAC -0.320190995907  
GGGACCCA -0.315574674896  
GGGACCCC -0.346883731789  
GGGACCGA -0.0881652365683  
GGGACCTA -0.167049855959  
GGGACGAA -0.0968595276623  
GGGACGAC -0.378148157334  
GGGACGCA -0.0663408830464  
GGGACGGA -0.152004124314  
GGGACGTA -0.0725687727049  
GGGACTAA -0.128591555897  
GGGACTAC -0.186202580158  
GGGACTCA -0.220584951998  
GGGACTGA -0.262947669456  
GGGACTTA -0.0390509696868  
GGGAGAAA -0.128208309553  
GGGAGAAC -0.0739647388694  
GGGAGACA -0.0561542447976  
GGGAGACC -0.296874749205  
GGGAGAGA -0.208278667112  
GGGAGATA 0.0955037480931  
GGGAGCAA -0.348534993368  
GGGAGCAC -0.212443276112  
GGGAGCCA -0.0743625224973  
GGGAGCCC -0.406485484146  
GGGAGCGA -0.00743229930603  
GGGAGCTA -0.208677218561  
GGGAGGAA -0.108454975258  
GGGAGGAC -0.323780401496  
GGGAGGCA -0.307263801719  
GGGAGGGA -0.0619729365101  
GGGAGGTA -0.303167140191  
GGGAGTAA 0.0313167379268  
GGGAGTAC -0.138363095195  
GGGAGTCA -0.248731421057  
GGGAGTGA -0.196536237997  
GGGAGTTA -0.0995848472153  
GGGATAAA 0.00274385424981  
GGGATAAC 0.123338175076  
GGGATACA 0.216219352861  
GGGATACC 0.115574251938  
GGGATAGA -0.127837737253

GGGATATA 0.157139489292  
GGGATCAA -0.136832832932  
GGGATCAC 0.127105975782  
GGGATCCA 0.276462412826  
GGGATCCC 0.196311180571  
GGGATCGA 0.200298533609  
GGGATCTA 0.20031188213  
GGGATGAA -0.271310424678  
GGGATGAC -0.256690675642  
GGGATGCA -0.254286068726  
GGGATGGA -0.109011840273  
GGGATGTA -0.039699130676  
GGGATTAA -0.0898627533691  
GGGATTAC 0.441217708514  
GGGATTCA 0.0598432151121  
GGGATTGA 0.0747455444425  
GGGATTTA 0.167670670273  
GGGCAAAA -0.128782803596  
GGGCAAAC -0.136297711713  
GGGCAACA 0.0390872966631  
GGGCAACC -0.085959770375  
GGGCAAGA -0.13467715075  
GGGCAATA -0.0656135546508  
GGGCACAA -0.137001105515  
GGGCACAC -0.216000529271  
GGGCACCA -0.286342458498  
GGGCACCC -0.348856634699  
GGGCACGA -0.0991212614756  
GGGCACTA -0.181777711622  
GGGCAGAA 0.0392887273269  
GGGCAGAC -0.313350240252  
GGGCAGCA -0.160267232436  
GGGCAGGA -0.226561143226  
GGGCAGTA -0.29029772783  
GGGCATAA -0.12111632592  
GGGCATAC -0.0610997829568  
GGGCATCA -0.25304215606  
GGGCATGA -0.00586045561046  
GGGCATTA -0.0772950138888  
GGGCCAAA -0.10819816208  
GGGCCAAC -0.226026817446  
GGGCCACA 0.0138960862654  
GGGCCACC -0.447299170311  
GGGCCAGA 0.101138196254  
GGGCCATA -0.147572553398  
GGGCCCAA -0.315502029949  
GGGCCCAC -0.175477608237  
GGGCCCCA -0.417088454735  
GGGCCCCC -0.222103711053  
GGGCCCGA -0.345024448397  
GGGCCCTA -0.262778480611  
GGGCCGAA 0.00810865962381  
GGGCCGAC -0.185443835261  
GGGCCGCA -0.306208201819

GGGCCGGA -0.272175502138  
GGGCCGTA -0.260270329119  
GGGCCTAA -0.241406458636  
GGGCCTAC -0.426953842473  
GGGCCTCA -0.202237164867  
GGGCCTGA -0.149883096425  
GGGCCTTA -0.225881798374  
GGGCGAAA -0.122832047242  
GGGCGAAC -0.137499896601  
GGGCGACA -0.0203502880005  
GGGCGACC -0.212447245171  
GGGCGAGA -0.159781131932  
GGGCGATA 0.0809872776509  
GGGCGCAA -0.149143242498  
GGGCGCAC -0.264691287754  
GGGCGCCA -0.160822050909  
GGGCGCCC -0.221749625919  
GGGCGCGA -0.0601425597331  
GGGCGCTA -0.226346327561  
GGGCGGAA -0.182246114016  
GGGCGGAC -0.311924362868  
GGGCGGCA -0.121234555647  
GGGCGGGA -0.131537589849  
GGGCGGTA -0.0835672465964  
GGGCGTAA -0.186274509804  
GGGCGTAC -0.202217956503  
GGGCGTCA -0.275576700553  
GGGCGTGA -0.140162533515  
GGGCGTTA -0.0531677296077  
GGGCTAAA -0.0849245820372  
GGGCTAAC 0.0581251657351  
GGGCTACA 0.0469234682483  
GGGCTACC -0.00600262436927  
GGGCTAGA -0.133218851671  
GGGCTATA -0.147386439753  
GGGCTCAA -0.372107988635  
GGGCTCAC -0.24860039528  
GGGCTCCA -0.379386889556  
GGGCTCGA -0.264905664812  
GGGCTCTA -0.254402069381  
GGGCTGAA -0.200287427996  
GGGCTGAC -0.242523576543  
GGGCTGCA 0.0415962945716  
GGGCTGGA -0.0631280238184  
GGGCTGTA -0.199589474314  
GGGCTTAA -0.158546163223  
GGGCTTAC -0.0235172958431  
GGGCTTCA -0.475388206119  
GGGCTTGA -0.033826411702  
GGGCTTTA -0.210232895328  
GGGGAAAA 0.0366715127481  
GGGGAAAC -0.0467395770426  
GGGGAAACA -0.0606942913659  
GGGGAAACC -0.122341411444

GGGAAGA 0.0638869221842  
GGGAATA 0.197043130442  
GGGACAA -0.215429589133  
GGGACAC -0.256763501828  
GGGACCA -0.299250638067  
GGGACCC -0.32354830085  
GGGACGA -0.0275755819809  
GGGACTA -0.208548726389  
GGGAGAA 0.125193608899  
GGGAGAC -0.293010811529  
GGGAGCA -0.167368666856  
GGGAGGA -0.142313131063  
GGGAGTA -0.115268920376  
GGGATAA 0.171330992382  
GGGATAC 0.13582403305  
GGGATCA -0.0539272054424  
GGGATGA -0.0981834876045  
GGGATTA 0.229106516985  
GGGCAAA -0.179973535128  
GGGCAAC -0.20474672412  
GGGCACA -0.160815665903  
GGGCACC -0.278818195599  
GGGCAGA 0.147609041548  
GGGCATA 0.000492227764955  
GGGCCAA -0.260444682475  
GGGCCAC -0.225739321222  
GGGCCCA -0.296769557383  
GGGCCCC -0.12439234604  
GGGCCGA -0.133207947066  
GGGCCTA -0.243204334749  
GGGCGAA -0.00286745466527  
GGGCGAC -0.202667481937  
GGGCGCA -0.0147378783742  
GGGCGGA -0.248765539317  
GGGCGTA -0.18152492583  
GGGCTAA -0.17004271627  
GGGCTAC -0.127403786507  
GGGCTCA -0.261266447488  
GGGCTGA -0.202338717014  
GGGCTTA -0.321366058311  
GGGGAAA 0.0215987971066  
GGGGAAC -0.123363884376  
GGGGACA -0.208813496692  
GGGGACC -0.452551204579  
GGGGAGA 0.120209741422  
GGGGATA 0.0054713799216  
GGGGCAA -0.337252324477  
GGGGCAC -0.280390665267  
GGGGCCA -0.173895499103  
GGGGCGA -0.0698149058914  
GGGGGCTA -0.215515265978  
GGGGGAA 0.0208386553371  
GGGGGAC -0.242265611432  
GGGGGCA -0.304612558411

GGGGGGGA -0.186057558303  
GGGGGGTA -0.240064550448  
GGGGGTAA -0.08230608554  
GGGGGTAC -0.205996179513  
GGGGGTCA -0.250830390787  
GGGGGTGA -0.23006706218  
GGGGGTTA -0.320489118159  
GGGGTAAA -0.0943635255811  
GGGGTAAC -0.0154748436166  
GGGGTACA -0.161970396125  
GGGGTACC -0.305130734357  
GGGGTAGA -0.105381716116  
GGGGTATA -0.231748183977  
GGGGTCAA -0.314580193545  
GGGGTCAC -0.128305420488  
GGGGTCCA -0.271496860595  
GGGGTCGA -0.0950044889528  
GGGGTCTA -0.356553706414  
GGGGTGAA 0.0789854083431  
GGGGTGAC -0.172269741499  
GGGGTGCA -0.200166824539  
GGGGTGGA 0.019712707021  
GGGGTGTA -0.139854634891  
GGGGTTAA -0.233274611485  
GGGGTTAC -0.171252790138  
GGGGTTCA -0.263636313516  
GGGGTTGA 0.0657475657476  
GGGGTTTA -0.199593889316  
GGGTAAAA 0.165403695707  
GGGTAAAC -0.218042014328  
GGGTAAACA -0.0902207332037  
GGGTAAACC -0.121146321893  
GGGTAAAGA 0.0426146936953  
GGGTAAATA 0.0967913111392  
GGGTACAA -0.0811580768304  
GGGTACAC -0.167669752298  
GGGTACCA -0.311324663804  
GGGTACCC -0.351016738996  
GGGTACGA 0.0951185345125  
GGGTACTA -0.186839108508  
GGGTAGAA 0.153780502265  
GGGTAGAC -0.207904863218  
GGGTAGCA -0.295549822638  
GGGTAGGA -0.233446360391  
GGGTAGTA -0.234626447895  
GGGTATAA -0.028893527879  
GGGTATAC -0.0860983267721  
GGGTATCA 0.147972672131  
GGGTATGA 0.0161507412246  
GGGTATTA 0.0868926778018  
GGGTCAAA -0.00476558907469  
GGGTCAAC -0.191745210401  
GGGTCACA -0.165308761453  
GGGTCACC -0.211322418218

GGGTCAGA -0.0569079464337  
GGGTCATA -0.192144162924  
GGGTCCAA -0.207877974049  
GGGTCCAC -0.324927834432  
GGGTCCCA -0.371654144663  
GGGTCCGA -0.075273361038  
GGGTCCTA -0.302624869418  
GGGTGCGA -0.077251768676  
GGGTGCGAC -0.262178665454  
GGGTGCGA -0.37323111401  
GGGTGCGA -0.119622599898  
GGGTGCGA -0.187905618496  
GGGTCTAA -0.226415934176  
GGGTCTAC -0.318355342766  
GGGTCTCA -0.343881682114  
GGGTCTGA -0.146825505661  
GGGTCTTA -0.304284920041  
GGGTGAAA 0.0340652154556  
GGGTGAAC 0.0149653657219  
GGGTGACA -0.0231623942229  
GGGTGACC -0.292531126051  
GGGTGAGA 0.0705378714335  
GGGTGATA -0.0786392453059  
GGGTGCAA -0.147028173352  
GGGTGCAC -0.297809530897  
GGGTGCCA -0.291750143363  
GGGTGCGA 0.000792725127043  
GGGTGCTA -0.204212813714  
GGGTGGAA -0.196876026183  
GGGTGGAC -0.172997438464  
GGGTGGCA -0.125441690956  
GGGTGGGA -0.0174469863703  
GGGTGGTA -0.18767766501  
GGGTGTAA 0.109827458312  
GGGTGTAC -0.230814083319  
GGGTGTCA -0.0962435305902  
GGGTGTGA 0.0721423903242  
GGGTGTTA -0.15410589653  
GGGTTAAA -0.0688657838215  
GGGTTAAC -0.0648246956474  
GGGTTACA -0.0951240496695  
GGGTTACC -0.244936541686  
GGGTTAGA -0.141678315123  
GGGTTATA -0.106062486041  
GGGTTCAA -0.206897264749  
GGGTTCAC -0.155730902735  
GGGTTCGA -0.328917666627  
GGGTTCGA 0.0206452009003  
GGGTTCCTA -0.143438453713  
GGGTTGAA -0.0366656204609  
GGGTTGAC -0.147743404423  
GGGTTGCA -0.206017705356  
GGGTTGGA -0.0360641737772  
GGGTTGTA -0.142225958015

GGGTTTAA -0.0559980438385  
GGGTTTAC -0.197542350687  
GGGTTTCA -0.331169248054  
GGGTTTGA -0.0605919282773  
GGGTTTTA -0.174242501646  
GGTAAAAA 0.263576248425  
GGTAAAAC 0.0111116626268  
GGTAAACA 0.151519287883  
GGTAAACC -0.0828193543207  
GGTAAAGA -0.0215758288823  
GGTAAATA 0.0666264765933  
GGTAACAA 0.00567371779493  
GGTAACAC -0.188435697844  
GGTAACCA -0.102777984555  
GGTAACGA 0.0645263242411  
GGTAACTA -0.00675094705955  
GGTAAGAA 0.109769520137  
GGTAAGAC 0.0893986568051  
GGTAAGCA -0.0385771446378  
GGTAAGGA -0.0661325767289  
GGTAAGTA -0.232994477393  
GGTAATAA 0.122563009569  
GGTAATAC -0.0128471639307  
GGTAATCA 0.335720385685  
GGTAATGA 0.0770165616811  
GGTAATTA 0.138131279155  
GGTACAAA 0.221136188798  
GGTACAAC -0.00745750093064  
GGTACACA 0.19414593657  
GGTACACC -0.171417920095  
GGTACAGA -0.0633419600253  
GGTACATA 0.0645728373001  
GGTACCAA -0.130488359591  
GGTACCAC -0.288829305511  
GGTACCCA -0.429287182472  
GGTACCGA -0.134502923977  
GGTACCTA -0.191663151278  
GGTACGAA 0.162845339153  
GGTACGAC -0.166077472899  
GGTACGCA 0.0263100566131  
GGTACGGA -0.0520872104083  
GGTACGTA -0.0508200550353  
GGTACTAA -0.0523657496973  
GGTACTAC -0.122377142624  
GGTACTCA -0.0995819277161  
GGTACTGA 0.0585060181164  
GGTACTTA 0.0397998583973  
GGTAGAAA 0.269662224208  
GGTAGAAC 0.0807446565022  
GGTAGACA -0.00439695894241  
GGTAGACC -0.212963300784  
GGTAGAGA 0.0340709489735  
GGTAGATA 0.15535061276  
GGTAGCAA -0.248238622016



GGTAGCAC -0.246336024797  
GGTAGCCA -0.342183964123  
GGTAGCGA 0.106719667326  
GGTAGCTA -0.110096543269  
GGTAGGAA 0.0360484451394  
GGTAGGAC -0.206451514041  
GGTAGGCA -0.0120878454212  
GGTAGGGA -0.086451568642  
GGTAGGTA -0.112102263798  
GGTAGTAA 0.0926424968796  
GGTAGTAC -0.2174806804  
GGTAGTCA -0.173852511669  
GGTAGTGA -0.0528638059021  
GGTAGTTA 0.041966234316  
GGTATAAA 0.27589710923  
GGTATAAC -0.0168733266607  
GGTATAACA 0.0648504047357  
GGTATAACC -0.274897680764  
GGTATAGA -0.0983605719899  
GGTATATA -0.0762180913696  
GGTATCAA 0.0997021963023  
GGTATCAC 0.140839186294  
GGTATCCA 0.289330160653  
GGTATCGA 0.132938723848  
GGTATCTA 0.361235891539  
GGTATGAA 0.00594152460359  
GGTATGAC -0.196834219763  
GGTATGCA -0.0906527594286  
GGTATGGA -0.0379473442187  
GGTATGTA -0.125593876666  
GGTATTAA 0.14444282242  
GGTATTAC 0.111682901628  
GGTATTCA -0.0512200462764  
GGTATTGA 0.100963482551  
GGTATTTA 0.0274668608002  
GGTCAAAA 0.190202404327  
GGTCAAAC 0.0605164393043  
GGTCAACA 0.0974657489252  
GGTCAACC -0.243070888497  
GGTCAAGA -0.101885627159  
GGTCAATA -0.250798610148  
GGTCACAA -0.0860565908207  
GGTCACAC -0.39166177415  
GGTCACCA -0.309023840277  
GGTCACGA -0.111727368732  
GGTCACTA -0.220822843466  
GGTCAGAA 0.151441209317  
GGTCAGAC -0.186277915379  
GGTCAGCA -0.198944851755  
GGTCAGGA -0.056055526446  
GGTCAGTA -0.198998422402  
GGTCATAA -0.214310720774  
GGTCATAC -0.122652696355  
GGTCATCA -0.145969958416

GGTCATGA -0.00440647285096  
GGTCATTA -0.193514276415  
GGTCCAAA 0.106609364185  
GGTCCAAC -0.27727698395  
GGTCCACA -0.0881491646168  
GGTCCACC -0.316010210017  
GGTCCAGA 0.00409990873774  
GGTCCATA -0.28931400199  
GGTCCCAA -0.209891400544  
GGTCCCAC -0.214837154253  
GGTCCCCA -0.22742330205  
GGTCCCGA -0.260862427972  
GGTCCCTA -0.321362921073  
GGTCCGAA -0.126001736757  
GGTCCGAC -0.105596096046  
GGTCCGCA -0.188341694021  
GGTCCGGA -0.0279887207346  
GGTCCGTA 0.0139799858397  
GGTCCTAA -0.245110200174  
GGTCCTAC -0.146573042536  
GGTCCTCA -0.207625775109  
GGTCCTGA -0.296465335483  
GGTCCTTA -0.219740008435  
GGTCGAAA 0.111451672058  
GGTCGAAC -0.232864156488  
GGTCGACA -0.0897840884375  
GGTCGACC -0.458155963884  
GGTCGAGA -0.138004746665  
GGTCGATA -0.125244702671  
GGTCGCAA -0.10120259492  
GGTCGCAC -0.236438788139  
GGTCGCCA -0.16975017186  
GGTCGCGA 0.0388159383371  
GGTCGCTA -0.281744844605  
GGTCGGAA 0.015733232119  
GGTCGGAC -0.220025195513  
GGTCGGCA -0.212555800558  
GGTCGGGA -0.0399842062933  
GGTCGGTA -0.254950842987  
GGTCGTAA -0.0428292449402  
GGTCGTAC -0.289649537347  
GGTCGTCA -0.17723738219  
GGTCGTGA 0.0684678437698  
GGTCGTTA -0.160036664875  
GGTCTAAA 0.212015065364  
GGTCTAAC -0.202377842033  
GGTCTACA -0.123874462318  
GGTCTAGA -0.078289054027  
GGTCTATA -0.23255695337  
GGTCTCAA -0.183062165866  
GGTCTCAC -0.281045022013  
GGTCTCCA -0.321324386759  
GGTCTCGA -0.0170164156989  
GGTCTCTA -0.188400342975

GGTCTGAA -0.0244077430957  
GGTCTGAC -0.254916950766  
GGTCTGCA -0.0349751465296  
GGTCTGGA -0.0128917785443  
GGTCTGTA -0.304398740965  
GGTCTTAA -0.217050288509  
GGTCTTAC -0.100130793564  
GGTCTTCA -0.357814881893  
GGTCTTGA -0.0987080574878  
GGTCTTTA -0.0651656122069  
GGTGAAAA 0.105024707488  
GGTGAAAC -0.245052529086  
GGTGAAAC 0.0834485376233  
GGTGAACC -0.035496001016  
GGTGAAGA 0.129108851631  
GGTGAATA 0.0797560646045  
GGTGACAA -0.0961448920403  
GGTGACAC -0.173947786692  
GGTGACCA -0.299760277371  
GGTGACGA -0.0290551626201  
GGTGACTA -0.0251135320247  
GGTGAGAA 0.0202411626023  
GGTGAGAC -0.131295960824  
GGTGAGCA 0.0131164222073  
GGTGAGGA -0.154093095701  
GGTGAGTA 0.0163318437316  
GGTGATAA -0.176572020695  
GGTGATAC 0.0428416167121  
GGTGATCA 0.127613993854  
GGTGATGA -0.127153479063  
GGTGATTA 0.0918775501266  
GGTGCAAA -0.0637411793895  
GGTGCAAC -0.208178653022  
GGTGCACA 0.0403808675722  
GGTGCACC -0.111594802045  
GGTGCAGA 0.0241084944289  
GGTGCATA 0.0353921414527  
GGTGCCAA -0.239670898747  
GGTGCCAC -0.298645046952  
GGTGCCCA -0.297368271281  
GGTGCCGA -0.271483034378  
GGTGCCTA -0.0170914781278  
GGTGCGAA -0.00243733646548  
GGTGCGAC -0.243591227998  
GGTGCGCA -0.0563177448669  
GGTGCGGA 0.0511455953519  
GGTGCGTA 0.0239958249089  
GGTGCTAA -0.127242753787  
GGTGCTAC -0.342578879095  
GGTGCTCA 0.0170474532087  
GGTGCTGA -0.160564583936  
GGTGCTTA -0.143622572984  
GGTGAAA 0.0752151412743  
GGTGGAAC -0.177488814114

GGTGGACA -0.174992738467  
GGTGGAGA -0.0457142481779  
GGTGGATA 0.222908257483  
GGTGGCAA -0.175784189678  
GGTGGCAC -0.28910612691  
GGTGGCCA -0.0586036047214  
GGTGGCGA -0.110061139807  
GGTGGCTA -0.221489133401  
GGTGGGAA -0.0264354482519  
GGTGGGAC -0.330227537778  
GGTGGGCA 0.0201758232061  
GGTGGGGA -0.0380040312282  
GGTGGGTA -0.0319313804162  
GGTGGTAA -0.0593103317408  
GGTGGTAC -0.257479354341  
GGTGGTCA -0.141571347046  
GGTGGTGA 0.0271001028577  
GGTGGTTA -0.0581805097154  
GGTGTA 0.11048589225  
GGTGTAAC -0.0831727203293  
GGTGTAACA 0.115314377378  
GGTGTAGA 0.123330875966  
GGTGTTATA -0.0203081869749  
GGTGTTCAA -0.243770001737  
GGTGTTCCAC -0.159772368214  
GGTGTTCCA -0.0551791647709  
GGTGTTCGA -0.0248886682936  
GGTGTTCTA 0.0403283139785  
GGTGTTGAA -0.0266560310137  
GGTGTTGAC -0.278374608011  
GGTGTTGCA -0.0504540353025  
GGTGTTGGA -0.0666923096012  
GGTGTTGTA -0.250288593866  
GGTGTTTAA 0.0133370284885  
GGTGTTTAC -0.0367599003963  
GGTGTTTCA 0.00799790400764  
GGTGTTTGA -0.0784428061192  
GGTGTTTTA -0.172242213674  
GGTTAAAA -0.00299336510879  
GGTTAAAC -0.252982623074  
GGTTAAACA 0.104607362183  
GGTTAAACC -0.13674121846  
GGTTAAGA 0.117859269921  
GGTTAATA -0.0589832256499  
GGTTACAA 0.0661215475097  
GGTTACAC -0.128576234637  
GGTTACCA -0.245546093391  
GGTTACGA 0.0724898452171  
GGTTACTA 0.0320278956643  
GGTTAGAA -0.0297335903397  
GGTTAGAC -0.187274762665  
GGTTAGCA -0.217230341679  
GGTTAGGA -0.136618122576  
GGTTAGTA -0.0908084392933

GGTTATAA -0.100069484081  
GGTTATAC -0.116515247707  
GGTTATCA -0.0707203491894  
GGTTATGA -0.0253435253435  
GGTTATTA -0.0286218577065  
GGTTCAAA -0.018058728641  
GGTTC AAC -0.249015173574  
GGTTCACA 0.0593417108569  
GGTTCAGA -0.0734546033108  
GGTTCATA -0.129937660283  
GGTTCCAA -0.131990459252  
GGTTC CAC -0.176012087424  
GGTTC CCA -0.363854809798  
GGTTC CGA -0.307277020312  
GGTTC CTA -0.274269248226  
GGTTC GAA 0.0810024900934  
GGTTC GAC -0.290525186628  
GGTTC GCA -0.000373651888803  
GGTTC GGA -0.0735035037811  
GGTTC GTA -0.128218770572  
GGTTC TAA -0.171303727716  
GGTTC TAC -0.0524728966763  
GGTTC TCA -0.0440906822399  
GGTTC TGA 0.0358821858809  
GGTTC TTA -0.11267804412  
GGTTGAAA 0.0324275137527  
GGTTG AAC -0.275612237302  
GGTTG ACA -0.0962713692935  
GGTTG AGA -0.0479115479115  
GGTTG ATA 0.0893956125766  
GGTTG CAA -0.188520952936  
GGTTG CAC -0.243030368488  
GGTTG CCA -0.135931136973  
GGTTG CGA -0.0108965715026  
GGTTG CTA -0.0840275192676  
GGTTG GAA 0.0101737247992  
GGTTG GAC -0.337631702995  
GGTTG GCA -0.15457974539  
GGTTG GGA -0.149008399295  
GGTTG GTA -0.140741027284  
GGTTG TAA 0.0978546790084  
GGTTG TAC -0.14768794438  
GGTTG TCA -0.144797783626  
GGTTG TGA -0.0138077268381  
GGTTG TTA -0.171644405262  
GGTTTAAA 0.112996795691  
GGTTT AAC -0.253028443509  
GGTTT ACA -0.204011139703  
GGTTT AGA -0.000809349294198  
GGTTT ATA 0.026609253882  
GGTTT CAA -0.0980287541475  
GGTTT CAC -0.33226633083  
GGTTT CCA -0.0944677459829  
GGTTT CGA -0.242183156042

GGTTTCTA -0.153126249466  
GGTTTGAA -0.0155945419103  
GGTTTGAC -0.0558564410998  
GGTTTGCA 0.0681262454107  
GGTTTGGA 0.0702579103554  
GGTTTGTA -0.168657666297  
GGTTTTAA 0.00786047755745  
GGTTTTAC -0.0278807203907  
GGTTTTCA 0.0147825882494  
GGTTTTGA 0.124164109013  
GGTTTTTA -0.0530273059714  
GTAAAAAA 0.167460849279  
GTAAAAAC 0.102664301418  
GTAAAACA 0.124857309477  
GTAAAAGA 0.109905929658  
GTAAAATA 0.237754647708  
GTAAACAA -0.076622986093  
GTAAACAC 0.135191665495  
GTAAACCA -0.150749923477  
GTAAACGA 0.14650594337  
GTAAACTA 0.017531813983  
GTAAAGAA -0.0334838971203  
GTAAAGAC -0.110478858036  
GTAAAGCA -0.0672576512923  
GTAAAGGA 0.0848392640016  
GTAAAGTA 0.208248193097  
GTAAATAA 0.1382788895  
GTAAATAC 0.238575067699  
GTAAATCA 0.185181279003  
GTAAATGA 0.15636956855  
GTAAATTA 0.129098795765  
GTAACAAA 0.209078839616  
GTAACAAC 0.0657087800997  
GTAACACA 0.0573755573756  
GTAACAGA 0.168021868134  
GTAACATA 0.102677313635  
GTAACCAA -0.0475741407122  
GTAACCAC -0.071355506478  
GTAACCCA -0.0682045682046  
GTAACCGA 0.125203716113  
GTAACCTA 0.0646489492931  
GTAACGAA 0.0445969385363  
GTAACGAC -0.209952503425  
GTAACGCA -0.0319007612972  
GTAACGGA 0.0357649102574  
GTAACGTA 0.251310555243  
GTAACTAA -0.0785261845868  
GTAACTAC 0.0491368802143  
GTAACTCA -0.024243251516  
GTAACTGA 0.14291000927  
GTAACTTA 0.108561729774  
GTAAGAAA 0.0687740081679  
GTAAGAAC -0.000594258170016  
GTAAGACA 0.0178263663112

GTAAGAGA 0.151632348602  
GTAAGATA 0.181668284636  
GTAAGCAA -0.134331968738  
GTAAGCAC -0.0456412606981  
GTAAGCCA -0.162913049888  
GTAAGCGA 0.0508302737896  
GTAAGCTA -0.119749723756  
GTAAGGAA 0.10537092651  
GTAAGGAC -0.186007239964  
GTAAGGCA -0.215136787875  
GTAAGGGA 0.219752810662  
GTAAGGTA -0.133336641935  
GTAAGTAA -0.0105325711386  
GTAAGTAC 0.0798924111151  
GTAAGTCA -0.0391782967541  
GTAAGTGA 0.222391813301  
GTAAGTTA 0.121403910863  
GTAATAAA 0.175137040795  
GTAATAAC 0.0141537046634  
GTAATACA 0.247827717525  
GTAATAGA 0.183341240703  
GTAATATA 0.193962950096  
GTAATCAA 0.333095625643  
GTAATCAC 0.386113442771  
GTAATCCA 0.468984620775  
GTAATCGA 0.380089455847  
GTAATCTA 0.481924483405  
GTAATGAA -0.0852636863991  
GTAATGAC -0.139656108947  
GTAATGCA 0.16920304241  
GTAATGGA 0.0923242556732  
GTAATGTA 0.0663045966076  
GTAATTAA 0.111323839624  
GTAATTAC 0.273150100464  
GTAATTCA 0.0799245272001  
GTAATTGA 0.126011109246  
GTAATTTA 0.279628112961  
GTACAAAA 0.193057816252  
GTACAAAC -0.0103785821489  
GTACAACA 0.0949139799858  
GTACAAGA 0.054085766207  
GTACAATA 0.259497237287  
GTACACAA -0.0659350525171  
GTACACAC 0.0675382643897  
GTACACCA 0.123460926491  
GTACACGA 0.0917375983324  
GTACACTA 0.0225171849021  
GTACAGAA -0.170781778879  
GTACAGAC -0.154900069474  
GTACAGCA -0.0158445989636  
GTACAGGA -0.306152750599  
GTACAGTA 0.222630891294  
GTACATAA 0.0526648892465  
GTACATAC 0.101781770355

GTACATCA -0.112460677844  
GTACATGA -0.0856893644665  
GTACATTA 0.208482296008  
GTACCAAA -0.0995842839481  
GTACCAAC -0.118534350467  
GTACCACA -0.159506332495  
GTACCAGA 0.0442727531514  
GTACCATA 0.218834537016  
GTACCCAA -0.229390147411  
GTACCCAC -0.0898475086088  
GTACCCCA -0.198834109766  
GTACCCGA -0.0624467442649  
GTACCCTA 0.00161522293734  
GTACCGAA 0.0828004312853  
GTACCGAC -0.260887423306  
GTACCGCA -0.0722223601011  
GTACCGGA -0.0995221053415  
GTACCGTA 0.229404465596  
GTACCTAA -0.0973543498348  
GTACCTAC -0.255987772237  
GTACCTCA -0.236824133538  
GTACCTGA -0.0109903291721  
GTACCTTA 0.000101457632315  
GTACGAAA 0.191621351357  
GTACGAAC 0.127313263677  
GTACGACA 0.0320223805072  
GTACGAGA 0.247882869095  
GTACGATA 0.187717787202  
GTACGCAA 0.128706851627  
GTACGCAC 0.00738013036211  
GTACGCCA -0.34249081042  
GTACGCGA 0.135078604776  
GTACGCTA -0.0291071846096  
GTACGGAA 0.01669575912  
GTACGGAC -0.0620853398808  
GTACGGCA -0.190085537941  
GTACGGGA 0.206707152398  
GTACGGTA 0.0589832256499  
GTACGTAA -0.00635483968817  
GTACGTAC 0.106002221616  
GTACGTCA -0.119270949651  
GTACGTGA 0.0087281395101  
GTACGTTA 0.140323519111  
GTACTAAA 0.062275774397  
GTACTAAC -0.0792194331511  
GTACTACA 0.0865404407203  
GTACTAGA 0.134088634089  
GTACTATA 0.121638167093  
GTACTCAA -0.0722918400217  
GTACTCAC 0.0406977225159  
GTACTCCA -0.187070559916  
GTACTCGA -0.12687678372  
GTACTCTA 0.060117661657  
GTACTGAA 0.0479573439998



GTACTGAC -0.0766478903529  
GTACTGCA -0.00908867976581  
GTACTGGA 0.0927277139398  
GTACTGTA 0.193635905783  
GTACTTAA -0.181788394091  
GTACTTCA -0.287782861563  
GTACTTGA 0.0409852339  
GTACTTTA 0.128601052843  
GTAGAAAA 0.222176429632  
GTAGAAAC 0.148223761523  
GTAGAACA 0.0409954526543  
GTAGAAGA 0.0431864762798  
GTAGAATA 0.117261889989  
GTAGACAA -0.0164324868798  
GTAGACAC 0.0174403053191  
GTAGACCA -0.0911212190661  
GTAGACGA 0.10802026233  
GTAGACTA 0.110405611556  
GTAGAGAA 0.0170608233864  
GTAGAGAC -0.0950691118446  
GTAGAGCA -0.132191289955  
GTAGAGGA -0.0727975053144  
GTAGAGTA 0.179919417823  
GTAGATAA -0.030058465873  
GTAGATAC 0.36378400473  
GTAGATCA -0.086441172821  
GTAGATGA 0.152034955065  
GTAGATTA 0.369900203234  
GTAGCAAA -0.000520426560002  
GTAGCAAC -0.16228966255  
GTAGCACA -0.0930626860268  
GTAGCAGA 0.169825702227  
GTAGCATA -0.0353138070699  
GTAGCCAA -0.281547830738  
GTAGCCAC -0.314661320731  
GTAGCCCA -0.0628599470125  
GTAGCCGA 0.00123533385725  
GTAGCCTA -0.273380749562  
GTAGCGAA 0.102169516341  
GTAGCGAC -0.0663438026905  
GTAGCGCA -0.31856749448  
GTAGCGGA -0.0225395880035  
GTAGCGTA 0.0471642441339  
GTAGCTAA -0.184166667883  
GTAGCTAC -0.0738016686098  
GTAGCTCA -0.296889947536  
GTAGCTGA 0.0709358016726  
GTAGCTTA -0.0114214457652  
GTAGGAAA -0.019613277189  
GTAGGAAC -0.15087223008  
GTAGGACA 0.00235761260702  
GTAGGAGA 0.0893228615432  
GTAGGATA 0.184427500807  
GTAGGCAA -0.131311723101

GTAGGCAC -0.028760116364  
GTAGGCCA -0.395676761664  
GTAGGCGA 0.158297415873  
GTAGGCTA -0.21929650485  
GTAGGGAA -0.0200566938605  
GTAGGGAC -0.176592003077  
GTAGGGCA -0.25064025693  
GTAGGGGA 0.205043179393  
GTAGGGTA 0.052984971132  
GTAGGTAA 0.0821755727977  
GTAGGTCA -0.0566999181121  
GTAGGTGA 0.126938232999  
GTAGGTTA -0.0261377079559  
GTAGTAAA 0.106995425177  
GTAGTAAC 0.0175257902531  
GTAGTACA 0.0305825419881  
GTAGTAGA 0.199151113479  
GTAGTATA 0.0907064088882  
GTAGTCAA -0.102270023284  
GTAGTCAC 0.0542650088105  
GTAGTCCA -0.171823949312  
GTAGTCGA 0.0456710327107  
GTAGTCTA -0.0684313482187  
GTAGTGAA -0.0826902558249  
GTAGTGAC -0.0591624682534  
GTAGTGCA -0.0124539851925  
GTAGTGGA 0.00591914228278  
GTAGTGTA 0.0632124843982  
GTAGTTAA -0.0327532973731  
GTAGTTCA -0.0350436046111  
GTAGTTGA 0.0415224484135  
GTAGTTTA 0.129390917914  
GTATAAAA 0.165163786376  
GTATAAAC 0.207553849186  
GTATAACA 0.240715922534  
GTATAAGA 0.208639769246  
GTATAATA 0.0381745381745  
GTATACAA 0.00258247227944  
GTATACAC 0.15209228995  
GTATACCA -0.0240338206845  
GTATACGA 0.317224938437  
GTATACTA 0.18807982307  
GTATAGAA -0.0214324706583  
GTATAGAC 0.0562146168207  
GTATAGCA 0.0112952990711  
GTATAGGA 0.0613847871944  
GTATAGTA 0.226052714174  
GTATATAA 0.0650664583987  
GTATATAC 0.217457639733  
GTATATCA 0.109041548435  
GTATATGA 0.145561046108  
GTATATTA 0.191741056765  
GTATCAAA 0.200850346343  
GTATCAAC 0.195396451173

GTATCACA 0.182912077792  
GTATCAGA 0.289039728434  
GTATCATA 0.0905519844914  
GTATCCAA 0.279794103163  
GTATCCAC 0.283318613461  
GTATCCCA 0.259547857161  
GTATCCGA 0.330321963753  
GTATCCTA 0.182748864567  
GTATCGAA 0.0461242522773  
GTATCGAC 0.085153609775  
GTATCGCA 0.151023700211  
GTATCGGA 0.302968257514  
GTATCGTA 0.173146281852  
GTATCTAA 0.270732164672  
GTATCTCA 0.246914959036  
GTATCTGA 0.341241807952  
GTATCTTA 0.289698035809  
GTATGAAA 0.257649452813  
GTATGAAC -0.182012157301  
GTATGACA -0.0722761645868  
GTATGAGA 0.0360452771918  
GTATGATA 0.035703747825  
GTATGCAA -0.132085481886  
GTATGCAC 0.0331915937977  
GTATGCCA -0.23287676898  
GTATGCCG 0.203921811931  
GTATGCTA -0.260609869377  
GTATGGAA 0.12483695817  
GTATGGAC -0.04765808048  
GTATGGCA -0.209101989926  
GTATGGGA 0.212641015671  
GTATGGTA 0.0740017687116  
GTATGTAA -0.124100518598  
GTATGTCA -0.253136169983  
GTATGTGA 0.219479810389  
GTATGTTA 0.144901099447  
GTATTTAA 0.118359406238  
GTATTTAA 0.0698594188153  
GTATTTACA 0.222532449805  
GTATTTAGA 0.172410477207  
GTATTTATA 0.179241010497  
GTATTTCAA -0.128097194952  
GTATTTCAC 0.0403999040363  
GTATTTCCA 0.0648358065152  
GTATTTCGA 0.0907670756156  
GTATTTCTA 0.0529762121997  
GTATTTGAA -0.0119452372089  
GTATTTGAC -0.0706240009343  
GTATTTGCA 0.171037860485  
GTATTTGGA 0.149674824639  
GTATTTGTA 0.173469612864  
GTATTTTAA -0.0217785718816  
GTATTTTCA 0.143631161361  
GTATTTTGA 0.133663966997

GTATTTTA 0.285645569805  
GTCAAAAA 0.0764530703707  
GTCAAAAC 0.129781296448  
GTCAAACA 0.0552039006445  
GTCAAAGA 0.123117741947  
GTCAAATA -0.00700562821775  
GTCAACAA 0.0326204535667  
GTCAACAC -0.0830498332567  
GTCAACCA -0.0665953355663  
GTCAACGA -0.068302413404  
GTCAACTA -0.0849130689274  
GTCAAGAA 0.0642856116489  
GTCAAGAC -0.156319474957  
GTCAAGCA -0.20860597533  
GTCAAGGA -0.0228703021102  
GTCAAGTA -0.0705393312555  
GTCAATAA -0.101292836051  
GTCAATCA -0.143502549128  
GTCAATGA 0.103366451851  
GTCAATTA -0.132363037778  
GTCACAAA 0.0692795048284  
GTCACAAC 0.048471710412  
GTCACACA -0.0964432836191  
GTCACAGA 0.0993900236324  
GTCACATA -0.0487081945963  
GTCACCAA -0.229634781238  
GTCACCAC -0.183706424942  
GTCACCCA -0.143028703635  
GTCACCGA -0.155527155316  
GTCACCTA -0.14656040014  
GTCACGAA -0.103505734626  
GTCACGAC -0.10821209289  
GTCACGCA -0.210728000105  
GTCACGGA -0.0549137841692  
GTCACGTA -0.0968844823988  
GTCACTAA -0.167805214843  
GTCACTCA -0.221148358602  
GTCACTGA 0.107270266704  
GTCACTTA -0.0956142890626  
GTCAGAAA 0.11353838967  
GTCAGAAC -0.0991022094407  
GTCAGACA -0.02796874009  
GTCAGAGA -0.0051326999622  
GTCAGATA 0.176712906668  
GTCAGCAA -0.147806215322  
GTCAGCAC -0.223008985205  
GTCAGCCA -0.254336638358  
GTCAGCGA 0.115722014046  
GTCAGCTA -0.173989023032  
GTCAGGAA 0.0711248438521  
GTCAGGAC -0.210733767182  
GTCAGGCA -0.0789369186498  
GTCAGGGA -0.170613052269  
GTCAGGTA -0.222988071243

GTCAGTAA 0.0230469405779  
GTCAGTCA -0.272258212338  
GTCAGTGA -0.0704873816137  
GTCAGTTA 0.0319889906196  
GTCATAAA -0.0200407018589  
GTCATAAC 0.0420684218594  
GTCATACA -0.147027173154  
GTCATAGA -0.0227841051642  
GTCATATA 0.014402436906  
GTCATCAA -0.215517455276  
GTCATCAC -0.159954720561  
GTCATCCA -0.120491945692  
GTCATCGA -0.159467343861  
GTCATCTA -0.166445790782  
GTCATGAA -0.0584727840231  
GTCATGAC 0.100891953947  
GTCATGCA -0.344819358689  
GTCATGGA -0.0854777207044  
GTCATGTA -0.15056342727  
GTCATTAA -0.103280933189  
GTCATTCA 0.135529148997  
GTCATTGA 0.0238352444837  
GTCATTTA 0.0453968161281  
GTCCAAAA 0.198511748085  
GTCCAAAC -0.116893060736  
GTCCAAACA -0.211467632096  
GTCCAAGA -0.0929652328059  
GTCCAATA -0.0949233193538  
GTCCACAA -0.133946618795  
GTCCACAC -0.132485484951  
GTCCACCA -0.283176619446  
GTCCACGA -0.076972642425  
GTCCACTA 0.0319617137799  
GTCCAGAA 0.0929724166624  
GTCCAGAC -0.165821639411  
GTCCAGCA -0.029607351737  
GTCCAGGA 0.019774019547  
GTCCAGTA -0.247756952462  
GTCCATAA -0.137541256173  
GTCCATCA -0.180471138235  
GTCCATGA -0.221548333871  
GTCCATTA -0.159159270931  
GTCCCAAA 0.151412012876  
GTCCCAAC -0.254913962574  
GTCCCACA -0.165431516726  
GTCCCAGA 0.0499452012922  
GTCCCATA -0.108932735482  
GTCCCCAA -0.176011542554  
GTCCCCAC -0.392979874391  
GTCCCCCA -0.283086177759  
GTCCCCGA -0.172095799798  
GTCCCCCTA -0.18851332122  
GTCCCGAA -0.241957749089  
GTCCCGAC -0.216364713764

GTCCCGCA -0.286912765553  
GTCCCGGA -0.218530236278  
GTCCCGTA -0.174362855796  
GTCCCTAA -0.30022986795  
GTCCCTCA -0.12179940454  
GTCCCTGA -0.236270008686  
GTCCCTTA -0.294677266605  
GTCCGAAA -0.147665958829  
GTCCGAAC -0.130040697819  
GTCCGACA -0.0462362138055  
GTCCGAGA -0.132095724141  
GTCCGATA -0.020435764449  
GTCCGCAA -0.01760576003  
GTCCGCAC -0.107631981107  
GTCCGCCA -0.181559310073  
GTCCGCGA -0.166155267725  
GTCCGCTA -0.215374776369  
GTCCGGAA -0.088540351502  
GTCCGGAC -0.0833540049116  
GTCCGGCA -0.164994610272  
GTCCGGGA -0.00527774330976  
GTCCGGTA -0.294187690705  
GTCCGTAA 0.0613326825448  
GTCCGTCA -0.334836846124  
GTCCGTGA 0.116431756969  
GTCCGTTA -0.163207890039  
GTCCTAAA -0.0721386353385  
GTCCTAAC -0.0762906647808  
GTCCTACA 0.0110880783632  
GTCCTAGA -0.225262520341  
GTCCTATA -0.0804942420177  
GTCCTCAA -0.328685171754  
GTCCTCAC -0.168110044087  
GTCCTCCA -0.381335949982  
GTCCTCGA -0.0292370813377  
GTCCTCTA -0.220745832058  
GTCCTGAA -0.052289284656  
GTCCTGCA -0.206892148837  
GTCCTGGA 0.000337674993371  
GTCCTGTA -0.213688787425  
GTCCTTAA -0.0518889889628  
GTCCTTCA -0.0742643186624  
GTCCTTGA -0.149488657827  
GTCCTTTA 0.0348890170288  
GTCGAAAA 0.162573812252  
GTCGAAAC -0.0450018903757  
GTCGAACA -0.0086808318066  
GTCGAAGA -0.0689343936875  
GTCGAATA -0.00987487084095  
GTCGACAA -0.110640642906  
GTCGACAC -0.224539276903  
GTCGACCA -0.326497216771  
GTCGACGA -0.104508744792  
GTCGACTA 0.0850601811639

GTCGAGAA -0.0563743125336  
GTCGAGAC -0.208472894182  
GTCGAGCA -0.276986134881  
GTCGAGGA -0.156022825952  
GTCGAGTA 0.0307256045488  
GTCGATAA -0.0456552046306  
GTCGATCA -0.262021795222  
GTCGATGA 0.0128311058882  
GTCGATTA 0.207078373256  
GTCGCAAA 0.0435019671102  
GTCGCAAC -0.0122560577106  
GTCGCACA -0.0995477920194  
GTCGCAGA 0.0352288668402  
GTCGCATA -0.124085603965  
GTCGCCAA -0.127314981083  
GTCGCCAC -0.27055189835  
GTCGCCCA -0.268048045418  
GTCGCCGA -0.221512427608  
GTCGCCTA 0.0865093743882  
GTCGCGAA 0.0328832215353  
GTCGCGAC -0.253551537599  
GTCGCGCA 0.00985233899988  
GTCGCGGA -0.00614465372388  
GTCGCGTA -0.0916136256483  
GTCGCTAA -0.160297924783  
GTCGCTCA -0.234823588703  
GTCGCTGA 0.0486062858277  
GTCGCTTA -0.30317350069  
GTCGGAAA 0.179988528473  
GTCGGAAC -0.134039149518  
GTCGGACA -0.151956040363  
GTCGGAGA -0.266333992068  
GTCGGATA 0.281202690294  
GTCGGCAA -0.0775949775429  
GTCGGCAC -0.264877531048  
GTCGGCCA -0.409715606275  
GTCGGCGA -0.265947821062  
GTCGGCTA -0.032871371245  
GTCGGGAA 0.0365983643496  
GTCGGGCA -0.0619107138426  
GTCGGGGA 0.0511558390346  
GTCGGGTA -0.200084640855  
GTCGGTAA -0.158834914329  
GTCGGTCA -0.226179154917  
GTCGGTGA -0.0984871155202  
GTCGGTTA 0.0974307131961  
GTCGTAAA 0.0737812627765  
GTCGTAAAC -0.0972873635479  
GTCGTACA -0.11329220328  
GTCGTAGA -0.121170139147  
GTCGTATA 0.00528765680281  
GTCGTCAA -0.166008969395  
GTCGTCAC -0.0362397955386  
GTCGTCCA -0.151059717501

GTGTCGA -0.303356383359  
GTGTCCTA -0.0580841295446  
GTGTCGAA -0.216535881229  
GTGTCGCA -0.00814175056599  
GTGTCGGA 0.00226810832871  
GTGTCGTA -0.201789824433  
GTGTCTTAA -0.13156880746  
GTGTCTTCA -0.0208645066166  
GTGTCTTGA -0.0481029305938  
GTGTCTTTA -0.0254600264228  
GTCTAAAA 0.0553049854828  
GTCTAAAC 0.101855298825  
GTCTAACA -0.0579089962908  
GTCTAAGA 0.0830269075643  
GTCTAATA 0.108512093361  
GTCTACAA 0.0107064437208  
GTCTACAC -0.0462858477552  
GTCTACCA -0.0952603715862  
GTCTACGA -0.278467311748  
GTCTACTA 0.186380590206  
GTCTAGAA -0.0382073426875  
GTCTAGAC -0.0866719588532  
GTCTAGCA -0.238637898573  
GTCTAGGA -0.106370866587  
GTCTAGTA -0.0158464249373  
GTCTATAA -0.192725322358  
GTCTATCA -0.00501229900075  
GTCTATGA 0.030519228065  
GTCTATTA 0.158751998131  
GTCTCAA 0.073377785499  
GTCTCAAC -0.166188298028  
GTCTCACA -0.098808260431  
GTCTCAGA -0.0148536966719  
GTCTCATA -0.0617384668834  
GTCTCCAA -0.159103877738  
GTCTCCAC -0.272523318697  
GTCTCCCA -0.265125011372  
GTCTCCGA -0.32952084152  
GTCTCCTA -0.137213303227  
GTCTCGAA -0.0451332678392  
GTCTCGCA -0.261963285103  
GTCTCGGA -0.241008592387  
GTCTCGTA -0.164204557893  
GTCTCTAA -0.288152050556  
GTCTCTCA -0.0821166725949  
GTCTCTGA 0.0466568496872  
GTCTCTTA -0.113563490291  
GTCTGAAA 0.0482507682314  
GTCTGAAC -0.15610172342  
GTCTGACA -0.117312289583  
GTCTGAGA 0.144057429399  
GTCTGATA 0.111196835106  
GTCTGCAA 0.0222476692605  
GTCTGCAC -0.00150142697605



GTCTGCCA -0.186639879384  
GTCTGCGA -0.132964120318  
GTCTGCTA -0.0725860017664  
GTCTGGAA -0.218654911787  
GTCTGGCA -0.208629192689  
GTCTGGGA -0.19866752686  
GTCTGGTA -0.287979038399  
GTCTGTAA -0.160021102742  
GTCTGTCA -0.101074139324  
GTCTGTGA 0.0812621076406  
GTCTGTTA 0.145834449119  
GTCTTAAA -0.120500180586  
GTCTTAAC -0.104290416998  
GTCTTACA 0.0291241654878  
GTCTTAGA -0.0650136459496  
GTCTTATA 0.031651131727  
GTCTTCAA -0.103002114967  
GTCTTCAC -0.193728224522  
GTCTTCCA -0.139022239997  
GTCTTCGA -0.349177246867  
GTCTTCTA -0.040839081458  
GTCTTGAA -0.164049255299  
GTCTTGCA -0.0227564359905  
GTCTTGGA 0.180584165433  
GTCTTGTA -0.0844522208159  
GTCTTTAA 0.0320938633136  
GTCTTTCA -0.0466917593856  
GTCTTTGA 0.00376561097202  
GTCTTTTA 0.168865835533  
GTGAAAAA 0.161476903901  
GTGAAAAC 0.0676182273381  
GTGAAACA 0.0700714488593  
GTGAAAGA 0.102955572653  
GTGAAATA 0.200185033518  
GTGAACAA 0.0078817557414  
GTGAACAC 0.174772085283  
GTGAACCA -0.12200324908  
GTGAACGA 0.000647431078152  
GTGAACTA 0.0382739044944  
GTGAAGAA 0.0192575495606  
GTGAAGCA -0.235906786739  
GTGAAGGA -0.0780664532619  
GTGAAGTA -0.0896250447071  
GTGAATAA 0.153672166567  
GTGAATCA -0.0229272829638  
GTGAATGA 0.111176397597  
GTGAATTA 0.0443763322551  
GTGACAAA 0.180658087779  
GTGACAAC -0.137618100266  
GTGACACA 0.00563390356018  
GTGACAGA 0.148015947142  
GTGACATA 0.0306818098874  
GTGACCAA -0.0750900904627  
GTGACCAC -0.125738122523

GTGACCCA -0.180712017072  
GTGACCGA -0.0169104691781  
GTGACCTA -0.200472672137  
GTGACGAA -0.0300219400364  
GTGACGCA -0.155492958523  
GTGACGGA -0.226063763801  
GTGACGTA -0.0596023444742  
GTGACTAA 0.0142208564776  
GTGACTCA -0.281003184055  
GTGACTGA -0.0738173473722  
GTGACTTA -0.150158716259  
GTGAGAAA -0.00082552936797  
GTGAGAAC 0.0166616789413  
GTGAGACA -0.094643912907  
GTGAGAGA 0.0681533364767  
GTGAGATA 0.280320265169  
GTGAGCAA 0.139634124483  
GTGAGCAC 0.262212447577  
GTGAGCCA -0.235841280081  
GTGAGCGA 0.0538550250724  
GTGAGCTA -0.282037535963  
GTGAGGAA 0.0352294443204  
GTGAGGCA -0.16105445131  
GTGAGGGA 0.148650029561  
GTGAGGTA -0.0898927408367  
GTGAGTAA 0.095854807976  
GTGAGTCA -0.243888957808  
GTGAGTGA 0.0547167277542  
GTGAGTTA -0.0356495843157  
GTGATAAA -0.0495172836533  
GTGATAAC -0.00382546367598  
GTGATACA 0.210567316628  
GTGATAGA 0.0688941118078  
GTGATATA 0.227565089816  
GTGATCAA 0.0999707391882  
GTGATCAC 0.270148208788  
GTGATCCA 0.0847054781726  
GTGATCGA -0.0241798272101  
GTGATCTA 0.0113943144246  
GTGATGAA -0.00745262496174  
GTGATGCA 0.0823288853592  
GTGATGGA -0.058504621609  
GTGATGTA 0.079378276348  
GTGATTAA -0.0265344554499  
GTGATTCA 0.0642956723575  
GTGATTGA 0.0743705137645  
GTGATTTA 0.0475971839608  
GTGCAAAA 0.0269561009504  
GTGCAAAC -0.052525127187  
GTGCAACA -0.252057638699  
GTGCAAGA 0.201577337723  
GTGCAATA 0.237211593907  
GTGCACAA 0.0850529503128  
GTGCACAC 0.125035948118

GTGCACCA -0.249702929897  
GTGCACGA -0.077562911174  
GTGCACTA -0.188902122638  
GTGCAGAA 0.0194195634734  
GTGCAGCA -0.230043189703  
GTGCAGGA 0.0236418215378  
GTGCAGTA 0.011332268908  
GTGCATAA 0.0478315781346  
GTGCATCA -0.155296525227  
GTGCATGA -0.148762266762  
GTGCATTA 0.0163930716846  
GTGCCAAA -0.0305781046319  
GTGCCAAC -0.357024056677  
GTGCCACA -0.320612241026  
GTGCCAGA -0.0346902192398  
GTGCCATA -0.0773315058175  
GTGCCCAA -0.186939488927  
GTGCCCAC -0.172651722029  
GTGCCCCA -0.104996180754  
GTGCCCGA -0.155967885374  
GTGCCCTA -0.279737540622  
GTGCCGAA -0.109365991502  
GTGCCGCA -0.139419856608  
GTGCCGGA 0.0172602059809  
GTGCCGTA -0.112584890521  
GTGCCTAA -0.0100559841755  
GTGCCTCA -0.361024979535  
GTGCCTGA -0.22585305202  
GTGCCTTA -0.253604785294  
GTGCGAAA 0.086409056736  
GTGCGAAC 0.0460019247898  
GTGCGACA -0.06891878104  
GTGCGAGA 0.0481516702829  
GTGCGATA 0.185060302256  
GTGCGCAA 0.13622986358  
GTGCGCAC 0.172738899501  
GTGCGCCA -0.289032460123  
GTGCGCGA -0.0332113043237  
GTGCGCTA -0.200178655616  
GTGCGGAA 0.0429118108456  
GTGCGGCA -0.324517859358  
GTGCGGGA -0.00956280762708  
GTGCGGTA 0.00738560307365  
GTGCGTAA 0.109126807442  
GTGCGTCA -0.226847493743  
GTGCGTGA -0.00249994525667  
GTGCGTTA 0.0082162051859  
GTGCTAAA -0.19781852872  
GTGCTAAC -0.0288566268216  
GTGCTACA 0.00804340273469  
GTGCTAGA -0.0100146120934  
GTGCTATA 0.00394544174448  
GTGCTCAA -0.155501650247  
GTGCTCCA -0.237986316155

GTGCTCGA -0.217694327615  
GTGCTCTA -0.340292155258  
GTGCTGAA -0.026230812464  
GTGCTGCA -0.206293474934  
GTGCTGGA 0.014693109544  
GTGCTGTA 0.0266395872456  
GTGCTTAA 0.0664948695252  
GTGCTTCA -0.269375690438  
GTGCTTGA -0.170492777146  
GTGCTTTA -0.187528434706  
GTGGAAAA 0.0755013853166  
GTGGAAAC -0.111028736631  
GTGGAAACA -0.121060513836  
GTGGAAGA 0.0352076799181  
GTGGAATA 0.164681547009  
GTGGACAA -0.0401137201375  
GTGGACAC -0.150321931312  
GTGGACCA -0.0286132420458  
GTGGACGA -0.0055536759548  
GTGGACTA -0.169212658556  
GTGGAGAA 0.0497967197799  
GTGGAGCA -0.285788624893  
GTGGAGGA -0.172404005143  
GTGGAGTA -0.105739742484  
GTGGATAA 0.169945913593  
GTGGATCA 0.0447044840984  
GTGGATGA -0.00796259935914  
GTGGATTA 0.394255136679  
GTGGCAA 0.0637265211377  
GTGGCAAC 0.0318188917873  
GTGGCACA -0.0772677361721  
GTGGCAGA -0.0907273684762  
GTGGCATA -0.0384900645453  
GTGGCCAA -0.249445375167  
GTGGCCAC -0.246526658123  
GTGGCCCA -0.274029908686  
GTGGCCGA 0.0557615526667  
GTGGCCTA -0.242637389902  
GTGGCGAA -0.0290498186621  
GTGGCGCA -0.249063391639  
GTGGCGGA 0.0441742151632  
GTGGCGTA -0.138167235994  
GTGGCTAA -0.15802803076  
GTGGCTCA -0.125043767869  
GTGGCTGA 0.0259610879266  
GTGGCTTA -0.169851208068  
GTGGGAAA -0.107000173702  
GTGGGAAC -0.270934466856  
GTGGGACA 0.0299211056787  
GTGGGAGA -0.0949469881844  
GTGGGATA 0.132064571459  
GTGGGCAA 0.107591074648  
GTGGGCCA -0.168772667236  
GTGGGCGA -0.153280192172

GTGGGCTA -0.0547200922043  
GTGGGGAA -0.0238709784164  
GTGGGGCA -0.0797538400457  
GTGGGGGA 0.072972854609  
GTGGGGTA -0.19196242718  
GTGGGTAA -0.0803742532668  
GTGGGTCA -0.10122560576  
GTGGGTGA -0.0720254301001  
GTGGGTTA -0.0441442888112  
GTGGTAAA -0.0479215783596  
GTGGTAAC -0.18440837062  
GTGGTACA 0.0565235797756  
GTGGTAGA 0.00120210379112  
GTGGTATA 0.163489936217  
GTGGTCAA -0.111019065789  
GTGGTCCA -0.115270505386  
GTGGTCGA -0.226044466499  
GTGGTCTA -0.259184471744  
GTGGTGAA 0.0881958789224  
GTGGTGCA -0.108576904718  
GTGGTGGA -0.094174063871  
GTGGTGTA 0.171037860485  
GTGGTTAA -0.048143801554  
GTGGTTCA -0.181933242338  
GTGGTTGA -0.111762954444  
GTGGTTTA 0.00519665671181  
GTGTAAAA 0.0492857820632  
GTGTAAAC -0.113734005825  
GTGTAACA 0.175322705626  
GTGTAAGA 0.0598081793829  
GTGTAATA 0.21045149833  
GTGTACAA -0.00547462865998  
GTGTACAC 0.015483780275  
GTGTACCA -0.00821166122072  
GTGTACGA -0.0835944428409  
GTGTACTA -0.0671858671586  
GTGTAGAA 0.105087180845  
GTGTAGCA 0.050354762476  
GTGTAGGA 0.000174422762827  
GTGTAGTA 0.0312144100023  
GTGTATAA 0.0836447737447  
GTGTATCA 0.0097403233581  
GTGTATGA 0.0369484518626  
GTGTATTA 0.0765710614195  
GTGTCAA 0.0527309620957  
GTGTCAAC -0.0310848038121  
GTGTCACA 0.0570336176397  
GTGTCAGA 0.159195784034  
GTGTCATA -0.00568089749859  
GTGTCCAA -0.204295605132  
GTGTCCCA -0.033298587844  
GTGTCCGA -0.198367594153  
GTGTCCTA -0.0835835835836  
GTGTCGAA -0.154525072145

GTGTCGCA -0.136068995371  
GTGTCGGA -0.0651077639092  
GTGTCGTA -0.147139105773  
GTGTCTAA -0.0582563885462  
GTGTCTCA 0.00215094102758  
GTGTCTGA -0.00649693802326  
GTGTCTTA -0.0673627584797  
GTGTGAAA -0.00701920592542  
GTGTGAAC -0.0965419045214  
GTGTGACA 0.04917727645  
GTGTGAGA 0.095255578345  
GTGTGATA 0.151182384991  
GTGTGCAA -0.129841326372  
GTGTGCCA -0.202629424003  
GTGTGCGA 0.0227403779479  
GTGTGCTA -0.0199855502886  
GTGTGGAA 0.081349107874  
GTGTGGCA -0.00684111647488  
GTGTGGGA 0.0739421764487  
GTGTGGTA -0.0117137606215  
GTGTGTAA 0.0606046818168  
GTGTGTCA -0.0648821931065  
GTGTGTGA 0.0128980316578  
GTGTGTTA -0.00259045422363  
GTGTTAAA -0.113374970702  
GTGTTAAC 0.0964029984745  
GTGTTACA 0.215613685311  
GTGTTAGA -0.0887257943257  
GTGTTATA 0.210893922031  
GTGTTCAA -0.188793537512  
GTGTTCCA -0.0201726302205  
GTGTTCGA -0.0207880056365  
GTGTTCTA -0.170992877882  
GTGTTGAA -0.14197224497  
GTGTTGCA -0.0475199717624  
GTGTTGGA -0.0246761913429  
GTGTTGTA 0.0850222257907  
GTGTTTAA -0.173306738016  
GTGTTTCA 0.0573424664334  
GTGTTTGA 0.0266986376157  
GTGTTTTA 0.0670664146041  
GTTAAAAA 0.0702589641984  
GTTAAAAC 0.039119581323  
GTTAAACA -0.0483164602235  
GTTAAAGA 0.0454233362286  
GTTAAATA 0.090175397619  
GTTAACAA 0.047630274903  
GTTAACCA 0.0547034637944  
GTTAACGA 0.114498952578  
GTTAACTA 0.0802358832662  
GTTAAGAA -0.119215404084  
GTTAAGCA 0.00994649752195  
GTTAAGGA 0.0320949176295  
GTTAAGTA 0.0238907177215

GTTAATAA 0.0668386823646  
GTTAATCA 0.128643722184  
GTTAATGA 0.152222870189  
GTTAATTA 0.013274982972  
GTTACAAA 0.0050929947195  
GTTACAAC 0.00497329285208  
GTTACACA 0.0293571808723  
GTTACAGA 0.222782010661  
GTTACATA 0.0318045318045  
GTTACCAA -0.280462888507  
GTTACCCA -0.130422883067  
GTTACCGA -0.0409283008401  
GTTACCTA -0.213397575863  
GTTACGAA -0.127518453262  
GTTACGCA 0.0502930592761  
GTTACGGA 0.0173740721006  
GTTACGTA 0.0323781231068  
GTTACTAA -0.0962109700576  
GTTACTCA 0.0266588902953  
GTTACTGA -0.0589270649828  
GTTACTTA 0.00235542287395  
GTTAGAAA 0.115801113844  
GTTAGAAC -0.205356625888  
GTTAGACA -0.142964429128  
GTTAGAGA -0.0799948539985  
GTTAGATA 0.138271880696  
GTTAGCAA -0.0193843981723  
GTTAGCCA 0.00382062503275  
GTTAGCGA -0.0139216318833  
GTTAGCTA -0.191055413416  
GTTAGGAA -0.00646742057867  
GTTAGGCA 0.0590928398457  
GTTAGGGA -0.00425632243814  
GTTAGGTA -0.110808080956  
GTTAGTAA 0.00212185134632  
GTTAGTCA -0.0453614428715  
GTTAGTGA 0.0890546193576  
GTTAGTTA -0.1776829312  
GTTATAAA 0.186371831274  
GTTATAAC -0.110662631174  
GTTATACA 0.134002175135  
GTTATAGA 0.137990607688  
GTTATATA 0.0606753136793  
GTTATCAA 0.0867594140274  
GTTATCCA 0.22127325679  
GTTATCGA 0.0278115581146  
GTTATCTA -0.000824069545922  
GTTATGAA -0.109312204842  
GTTATGCA 0.108888378788  
GTTATGGA 0.107220279848  
GTTATGTA -0.0644625341595  
GTTATTAA -0.0741535149756  
GTTATTCA 0.115709373285  
GTTATTGA 0.00211893170223

GTTATTTA 0.105182368269  
GTTCAAAA -0.0453083937932  
GTTCAAAC -0.0274743169806  
GTTCAACA -0.117913449903  
GTTCAAGA -0.112591710299  
GTTCAATA 0.0642391702998  
GTTCACAA -0.0471024700423  
GTTCACCA 0.177498435074  
GTTCACGA -0.12394930816  
GTTCACTA 0.0161001221607  
GTTCAGAA -0.127243300771  
GTTCAGCA -0.122992138144  
GTTCAGGA -0.17241215734  
GTTCAGTA -0.00949541250922  
GTTCATAA -0.239900902676  
GTTCATCA -0.123369155121  
GTTCATGA 0.132963542054  
GTTCATT A 0.0594340645488  
GTTCCAAA 0.045707496836  
GTTCCAAC -0.206847638189  
GTTCCACA -0.123658142512  
GTTCCAGA 0.0438377261812  
GTTCCATA 0.00368274610699  
GTTCCCAA -0.152010940442  
GTTCCCCA -0.091627583811  
GTTCCCGA -0.0225561318323  
GTTCCCTA -0.172569601056  
GTTCCGAA -0.263420162021  
GTTCCGCA -0.160380635716  
GTTCCGGA -0.204720565248  
GTTCCGTA -0.0867275224524  
GTTCCCTAA -0.150271732387  
GTTCCCTCA -0.00569111625293  
GTTCCCTGA 0.0568598901932  
GTTCCCTTA -0.0501644895584  
GTTCGAAA -0.0208945485438  
GTTCGAAC -0.0896322757229  
GTTCGACA -0.181534938102  
GTTCGAGA 0.136040999677  
GTTCGATA 0.0579601640208  
GTTCGCAA -0.0553646527475  
GTTCGCCA -0.217687581148  
GTTCGCGA -0.10525389955  
GTTCGCTA -0.0844301046391  
GTTCGGAA 0.0793522769574  
GTTCGGCA -0.226754935768  
GTTCGGGA -0.165157360495  
GTTCGGTA 0.0636628363901  
GTTCGTAA 0.0839399944352  
GTTCGTCA -0.0629155326125  
GTTCGTGA 0.0702219841208  
GTTCGTTA -0.03519802963  
GTTCTAAA -0.0391369330763  
GTTCTACA -0.0327192046284



GTTCTAGA 0.174664058451  
GTTCTATA 0.0675262038898  
GTTCTCAA -0.190463194979  
GTTCTCCA -0.170938686385  
GTTCTCGA -0.268500101422  
GTTCTCTA -0.0561539500933  
GTTCTGAA -0.00920883031725  
GTTCTGCA -0.128961409604  
GTTCTGGA 0.0465915576842  
GTTCTGTA -0.00475382939709  
GTTCTTAA -0.295456568596  
GTTCTTCA 0.0163171609381  
GTTCTTGA 0.060056349131  
GTTCTTTA 0.0804821792224  
GTTGAAAA 0.244879684506  
GTTGAAAC 0.00367218236097  
GTTGAACA -0.13151494252  
GTTGAAGA 0.12294840259  
GTTGAATA 0.0951993944959  
GTTGACAA 0.0884203762992  
GTTGACCA -0.0697756733521  
GTTGACGA 0.12325496522  
GTTGACTA -0.131295960824  
GTTGAGAA 0.0713144967628  
GTTGAGCA -0.145779398912  
GTTGAGGA 0.00844796259075  
GTTGAGTA 0.0027670926914  
GTTGATAA -0.128441712955  
GTTGATCA -0.0269429623196  
GTTGATGA 0.0688678350109  
GTTGATTA 0.0969909303243  
GTTGCAA 0.147566841602  
GTTGCAAC -0.315908921795  
GTTGCACA -0.247918135467  
GTTGCAGA 0.207895447545  
GTTGCATA 0.0487806836347  
GTTGCCAA -0.11310070401  
GTTGCCCA -0.214730179948  
GTTGCCGA -0.0908973948707  
GTTGCCTA -0.103651709586  
GTTGCGAA 0.0198132016314  
GTTGCGCA 0.116133953271  
GTTGCGGA 0.0536535696299  
GTTGCGTA 0.0725670574155  
GTTGCTAA -0.0966390725335  
GTTGCTCA -0.187908131903  
GTTGCTGA -0.095836538223  
GTTGCTTA -0.0883170441523  
GTTGGAAA 0.116958556352  
GTTGGACA -0.240823555683  
GTTGGAGA 0.0450354646164  
GTTGGATA 0.2963087054  
GTTGGCAA 0.0895196912922  
GTTGGCCA -0.235384942003

GTTGGCGA -0.341435041611  
GTTGGCTA -0.0786282149919  
GTTGGGAA -0.0145244994635  
GTTGGGCA -0.222839827842  
GTTGGGGA -0.0480525845596  
GTTGGGTA -0.120527686914  
GTTGGTAA 0.0384188667401  
GTTGGTCA -0.0427968730612  
GTTGGTGA -0.0537720659398  
GTTGGTTA -0.0469270923816  
GTTGTAAA 0.143044312898  
GTTGTACA -0.0858249654814  
GTTGTAGA 0.0966876637738  
GTTGTATA 0.0557060794289  
GTTGTCAA 0.135610817429  
GTTGTCCA -0.0906512573179  
GTTGTCTA -0.0918653310311  
GTTGTCTA 0.0285300321891  
GTTGTGAA 0.0461033699992  
GTTGTGCA -0.192398038097  
GTTGTGGA -0.0267223669879  
GTTGTGTA 0.0486702659207  
GTTGTTAA 0.021487850631  
GTTGTTCA 0.0500238530542  
GTTGTTGA 0.112423085626  
GTTGTTTA -0.00397728516894  
GTTTAAAA 0.080930793052  
GTTTAAAC 0.138261851016  
GTTTAAACA 0.0887410973522  
GTTTAAAGA 0.106151606152  
GTTTAAATA 0.178583393305  
GTTTACAA 0.0463930317393  
GTTTACCA -0.0188295146822  
GTTTACGA 0.121383383255  
GTTTACTA -0.102398487624  
GTTTAGAA -0.0318955318955  
GTTTAGCA -0.104433422666  
GTTTAGGA 0.0988146244973  
GTTTAGTA -0.0142856354978  
GTTTATAA 0.0635166847288  
GTTTATCA 0.0097080551626  
GTTTATGA -0.00637138515926  
GTTTATTA 0.0161829664739  
GTTTCAAA -0.0656506807711  
GTTTCACA -0.0700599519158  
GTTTCAGA -0.030715288291  
GTTTCATA 0.057422830157  
GTTTCCAA 0.0769736678828  
GTTTCCCA -0.0322209261603  
GTTTCCGA 0.147305327427  
GTTTCCTA -0.216700406188  
GTTTCGAA -0.246805607245  
GTTTCGCA -0.114579699526  
GTTTCGGA -0.0282221278298

GTTTCGTA 0.0489490532794  
GTTTCTAA 0.0242819500303  
GTTTCTCA -0.0939607161887  
GTTTCTGA 0.0107145713206  
GTTTCTTA -0.103645870587  
GTTTGAAA 0.0673690219145  
GTTTGACA -0.00308679371985  
GTTTGAGA -0.00111268293086  
GTTTGATA 0.0660950206405  
GTTTGCAA 0.0704356838901  
GTTTGCCA -0.102793701213  
GTTTGCGA 0.0104203719789  
GTTTGCTA -0.160528055792  
GTTTGCAA -0.17435645573  
GTTTGCCA -0.148128847973  
GTTTGGA 0.155579344479  
GTTTGGA -0.172255147624  
GTTTGTA 0.0925622592289  
GTTTGTA -0.111041144502  
GTTTGTCA 0.0452477959685  
GTTTGTGA 0.104353189346  
GTTTGTGA -0.170041272756  
GTTTGTGA 0.0624796537302  
GTTTGTGA -0.10599548915  
GTTTGTGA -0.0589862995701  
GTTTGTGA 0.0861343437101  
GTTTGTGA -0.145095557765  
GTTTGTGA -0.0607204740099  
GTTTGTGA -0.20519288611  
GTTTGTGA -0.0316369704941  
GTTTGTGA -0.127787209382  
GTTTGTGA 0.0143821507458  
GTTTGTGA 0.127688294355  
GTTTGTGA 0.0118562088259  
GTTTGTGA 0.0997236906328  
GTTTGTGA 0.0930395684766  
GTTTGTGA 0.118952285619  
TAAAAAAA 0.12933658387  
TAAAAACA 0.140425549516  
TAAAAAGA 0.204395855911  
TAAAAATA 0.0966434754314  
TAAAAACA 0.112345127497  
TAAAAACA 0.0563676624283  
TAAAAACA 0.0296803719627  
TAAAAACTA -0.118593800412  
TAAAAAGAA 0.156027928755  
TAAAAAGCA 0.158349087246  
TAAAAAGGA 0.156679050824  
TAAAAAGTA -0.0313711172274  
TAAAAATA 0.228408866959  
TAAAAATCA 0.250817135391  
TAAAAATGA 0.0592162410344  
TAAAAATTA 0.0116879965365  
TAAACAAA 0.127389181259

TAAACACA 0.0930643854514  
TAAACAGA 0.165086574177  
TAAACATA -0.0594095897869  
TAAACCAA 0.0762866962801  
TAAACCCA -0.192133748896  
TAAACCGA -0.00799578704738  
TAAACCTA -0.25685742565  
TAAACGAA 0.02093002093  
TAAACGCA 0.194986998017  
TAAACGGA 0.128818901546  
TAAACGTA -0.0616049442184  
TAAACTAA 0.0577761070925  
TAAACTCA 0.0417063859915  
TAAACTGA 0.1011123844  
TAAACTTA -0.0628955009058  
TAAAGAAA 0.0417764574498  
TAAAGACA 0.0603629117611  
TAAAGAGA 0.0640737155889  
TAAAGATA 0.227511302642  
TAAAGCAA 0.0131376685182  
TAAAGCCA -0.148343148201  
TAAAGCGA -0.0913682277319  
TAAAGCTA -0.166226942025  
TAAAGGAA 0.168521127275  
TAAAGGCA 0.0339196951892  
TAAAGGGA 0.143627098173  
TAAAGGTA 0.00939760443202  
TAAAGTAA 0.211644270563  
TAAAGTCA 0.0395229940684  
TAAAGTGA 0.0963037305752  
TAAAGTTA -0.213702235487  
TAAATAAA 0.143070589695  
TAAATACA 0.0953110515828  
TAAATAGA 0.0654938685242  
TAAATATA 0.0241710035547  
TAAATCAA 0.208451438358  
TAAATCCA 0.275493967285  
TAAATCGA 0.0579250089414  
TAAATCTA 0.284766756932  
TAAATGAA 0.180415757319  
TAAATGCA 0.0430526945678  
TAAATGGA 0.158007488887  
TAAATGTA -0.00626383959717  
TAAATTAA 0.122883213792  
TAAATTCA 0.104582543976  
TAAATTGA 0.0810047894384  
TAAATTTA -0.0455746285317  
TAACAAA 0.287730195689  
TAACAACA -0.07276532938  
TAACAAGA 0.152971997142  
TAACAATA 0.127832096682  
TAACACAA 0.23126135924  
TAACACCA -0.0585420130875  
TAACACGA 0.10715020839

TAACACTA -0.00524441070633  
TAACAGAA 0.216096727809  
TAACAGCA 0.0281154427275  
TAACAGGA 0.186144099034  
TAACAGTA 0.0341999810223  
TAACATAA 0.175066969336  
TAACATCA 0.030204603614  
TAACATGA -0.0144091735217  
TAACATTA 0.00203134237936  
TAACCAAA -0.0237199185419  
TAACCACA -0.0776039378205  
TAACCAGA 0.0497839437233  
TAACCATA -0.124462643559  
TAACCCAA -0.12535856879  
TAACCCCA -0.294824860637  
TAACCCGA 0.00507982983604  
TAACCCTA -0.120402720328  
TAACCGAA 0.0723988451261  
TAACCGCA 0.0937590483045  
TAACCGGA -0.140409334102  
TAACCGTA -0.0246250082115  
TAACCTAA 0.117833186135  
TAACCTCA -0.0319093197881  
TAACCTGA 0.039087465238  
TAACCTTA -0.247284878864  
TAACGAAA 0.227272727273  
TAACGACA -0.139750945412  
TAACGAGA 0.0425811486418  
TAACGATA 0.0204251001803  
TAACGCAA 0.164362094261  
TAACGCCA -0.152931689982  
TAACGCGA 0.110014973651  
TAACGCTA 0.0385998846741  
TAACGGAA 0.182320061108  
TAACGGCA 0.0378436968534  
TAACGGGA 0.0770545170544  
TAACGGTA 0.0363415363755  
TAACGTAA 0.286941891783  
TAACGTCA -0.0463150318277  
TAACGTGA -0.0132543011331  
TAACGTTA 0.0936482735619  
TAACTAAA 0.0882438912742  
TAACTACA 0.0631073772107  
TAACTAGA 0.0898874080692  
TAACTATA -0.0817437876707  
TAACTCAA 0.0131833635258  
TAACTCCA -0.0957178424609  
TAACTCGA -0.206533239738  
TAACTCTA 0.0397385458713  
TAACTGAA 0.0890711648287  
TAACTGCA -0.0918730707785  
TAACTGGA 0.0870489556895  
TAACTGTA 0.0275329737305  
TAACTTAA 0.143599045276

TAAC TTCA 0.0122179806282  
TAAC TTGA 0.0643131902221  
TAAGAAAA 0.133076647957  
TAAGAACA 0.0624963806782  
TAAGAAGA 0.0767116979238  
TAAGAATA 0.141257490712  
TAAGACAA 0.108019827779  
TAAGACCA -0.140985129855  
TAAGACGA 0.0115785785713  
TAAGACTA -0.187106929713  
TAAGAGAA 0.0961224199214  
TAAGAGCA -0.15210954236  
TAAGAGGA 0.0346934008744  
TAAGAGTA 0.103444425143  
TAAGATAA 0.187300278096  
TAAGATCA 0.159557819902  
TAAGATGA 0.0308145611176  
TAAGATTA 0.133589512377  
TAAGCAAA -0.0372174331949  
TAAGCACA -0.0317940760442  
TAAGCAGA -0.120228497861  
TAAGCATA 0.132131506448  
TAAGCCAA -0.0571971858947  
TAAGCCCA -0.0116734670044  
TAAGCCGA -0.1068374197  
TAAGCCTA -0.173151046798  
TAAGCGAA 0.0726254169617  
TAAGCGCA -0.0528589114712  
TAAGCGGA 0.0825605603121  
TAAGCGTA -0.0382004808177  
TAAGCTAA -0.0746242109878  
TAAGCTCA 0.120790785603  
TAAGCTGA -0.100191889366  
TAAGCTTA -0.17201344964  
TAAGGAAA 0.128700647691  
TAAGGACA -0.0885524810081  
TAAGGAGA -0.222562337179  
TAAGGATA 0.0749266193704  
TAAGGCAA 0.028130040948  
TAAGGCCA 0.0510000358485  
TAAGGCCGA -0.153401006636  
TAAGGCTA -0.0516963020164  
TAAGGGAA 0.0257397172413  
TAAGGGCA -0.0780992959977  
TAAGGGGA 0.131359034171  
TAAGGGTA -0.0525969675162  
TAAGGTAA 0.116622131774  
TAAGGTCA -0.0847975838225  
TAAGGTGA -0.0776632628483  
TAAGTAAA 0.084279628858  
TAAGTACA -0.155789312375  
TAAGTAGA 0.0200547595192  
TAAGTATA -0.121855794602  
TAAGTCAA -0.0737252403919

TAAGTCCA -0.180895379913  
TAAGTCGA -0.0872383841008  
TAAGTCTA 0.00307332125514  
TAAGTGAA -0.00431104603872  
TAAGTGCA 0.0252111615748  
TAAGTGGA -0.10414960415  
TAAGTGTA -0.0869174960084  
TAAGTTAA 0.217979687677  
TAAGTTCA 0.103862689138  
TAAGTTGA -0.123363884376  
TAATAAAA 0.138997123846  
TAATAACA 0.121134909014  
TAATAAGA -0.040162752284  
TAATAATA 0.217991576827  
TAATACAA 0.233950418145  
TAATACCA 0.0908718635991  
TAATACGA 0.2473018839  
TAATACTA 0.0722820557362  
TAATAGAA 0.0445471996964  
TAATAGCA 0.0945261381345  
TAATAGGA 0.0955530188351  
TAATAGTA 0.0298935059816  
TAATATAA 0.22263133732  
TAATATCA 0.269659466629  
TAATATGA 0.279136784376  
TAATATTA 0.146286557686  
TAATCAAA 0.233289763593  
TAATCACA 0.290667357649  
TAATCAGA 0.26676125161  
TAATCATA 0.2323445472  
TAATCCAA 0.403301387561  
TAATCCCA 0.190106056072  
TAATCCGA 0.275000547433  
TAATCCTA 0.31360895352  
TAATCGAA 0.306249775947  
TAATCGCA 0.259377531879  
TAATCGGA 0.212947106887  
TAATCGTA 0.291168579047  
TAATCTAA 0.329862920772  
TAATCTCA 0.388657252294  
TAATCTGA 0.410587319357  
TAATGAAA 0.193484117727  
TAATGACA -0.0526635734313  
TAATGAGA 0.0276045050108  
TAATGATA 0.0948510493965  
TAATGCAA 0.0706670858186  
TAATGCCA 0.0922279074181  
TAATGCGA -0.132737931024  
TAATGCTA -0.0548041154102  
TAATGGAA -0.0911192727333  
TAATGGCA -0.0962574144392  
TAATGGGA 0.184739836255  
TAATGGTA 0.0463535160505  
TAATGTAA -0.0254337496259

TAATGTCA 0.0894542455275  
TAATGTGA 0.108426608427  
TAATTTAAA 0.0238615212806  
TAATTACA 0.106909731702  
TAATTAGA -0.0607264074509  
TAATTATA 0.0949869710882  
TAATTCAA -0.0775056020671  
TAATTCCA 0.16629343883  
TAATTCTGA -0.186407408326  
TAATTCTA 0.0550729793154  
TAATTGAA 0.0460712539141  
TAATTGCA 0.241567702897  
TAATTGGA 0.215848079484  
TAATTGTA -0.0991854232325  
TAATTTAA 0.191235958337  
TAATTTCA 0.240294738071  
TAATTTGA 0.0301168937533  
TACAAAAA 0.220435318935  
TACAAACA 0.157255051194  
TACAAAGA 0.153598826303  
TACAAATA 0.196794960694  
TACAACAA 0.11874546723  
TACAACCA 0.00197002985336  
TACAACGA 0.264646407909  
TACAACCTA -0.0249180631955  
TACAAGAA 0.0788617767494  
TACAAGCA 0.0837545534515  
TACAAGGA -0.0371289517586  
TACAAGTA 0.117784822692  
TACAATAA 0.11224790698  
TACAATCA 0.235059816208  
TACAATGA 0.0595103756852  
TACACAAA -0.0210572031269  
TACACACA 0.250387947709  
TACACAGA 0.0116661678941  
TACACATA 0.135718362991  
TACACCAA 0.132174874599  
TACACCCA -0.0153347007  
TACACCGA 0.0361382002862  
TACACCTA -0.0742418101154  
TACACGAA 0.18701483853  
TACACGCA 0.174077209988  
TACACGGA -0.0202678932456  
TACACGTA 0.143634081006  
TACACTAA 0.00661226396502  
TACACTCA -0.00219365370881  
TACACTGA 0.0353517806179  
TACAGAAA 0.109550155836  
TACAGACA 0.133410947206  
TACAGAGA 0.150427351544  
TACAGATA 0.24226841748  
TACAGCAA 0.0148952942636  
TACAGCCA -0.077407196014  
TACAGCGA -0.101852514179



TACAGCTA -0.144791944918  
TACAGGAA -0.00202686231204  
TACAGGCA 0.175586665985  
TACAGGGA 0.0498832165499  
TACAGGTA 0.191084136844  
TACAGTAA 0.0856937439326  
TACAGTCA -0.0487526093587  
TACAGTGA -0.0188070877756  
TACATAAA 0.153736049576  
TACATACA 0.0867710926038  
TACATAGA 0.156153514887  
TACATATA -0.0590631954268  
TACATCAA 0.0254400405916  
TACATCCA 0.115672649504  
TACATCGA -0.0112732406327  
TACATCTA -0.0485018576236  
TACATGAA -0.011632591987  
TACATGCA 0.197866470077  
TACATGGA 0.119978104827  
TACATGTA -0.0159551156425  
TACATTAA 0.153479120895  
TACATTCA 0.139086174397  
TACATTGA 0.1347612826  
TACCAAAA 0.131762808114  
TACCAACA -0.0627351225886  
TACCAAGA 0.107573144403  
TACCAATA 0.195530240985  
TACCACAA 0.0900904533836  
TACCACCA -0.0283674963397  
TACCACGA 0.0759625701627  
TACCACTA -0.154592965118  
TACCAGAA -0.0256147675598  
TACCAGCA 0.00228442701828  
TACCAGGA -0.224924112718  
TACCAGTA -0.154182070814  
TACCATAA 0.150581711188  
TACCATCA -0.015731772297  
TACCATGA 0.00797629585508  
TACCCAAA 0.10377733105  
TACCCACA 0.0777026780435  
TACCCAGA 0.104673544067  
TACCCATA 0.110969102866  
TACCCCAA -0.0302575302575  
TACCCCCA -0.137965835298  
TACCCCGA -0.00957960671426  
TACCCCTA -0.167195069794  
TACCCGAA 0.0558111866164  
TACCCGCA 0.0465821916308  
TACCCGGA -0.290193889242  
TACCCGTA -0.0161230046057  
TACCCTAA 0.00992973486308  
TACCCTCA -0.0505485281344  
TACCCTGA -0.179681318833  
TACCGAAA 0.0999737232031

TACCGACA 0.105474936829  
TACCGAGA 0.0641380115764  
TACCGATA 0.183247812092  
TACCGCAA 0.163252784465  
TACCGCCA 0.0591308219528  
TACCGCGA 0.0662199611201  
TACCGCTA -0.0064341707268  
TACCGGAA 0.0176305782366  
TACCGGCA 0.012413239686  
TACCGGGA -0.000728254579513  
TACCGGTA 0.189828252007  
TACCGTAA 0.287414874127  
TACCGTCA -0.175138698938  
TACCGTGA -0.221058569571  
TACCTAAA 0.109187894907  
TACCTACA 0.0557790705313  
TACCTAGA 0.0520944796829  
TACCTATA -0.0541712511409  
TACCTCAA 0.0457509243864  
TACCTCCA -0.123662229723  
TACCTCGA -0.107614675104  
TACCTCTA -0.166609258397  
TACCTGAA 0.175069888981  
TACCTGCA 0.178176390298  
TACCTGGA 0.00514702029854  
TACCTTAA 0.142990097536  
TACCTTCA -0.0408541738738  
TACCTTGA 0.0732153843943  
TACGAAAA 0.257941066984  
TACGAACA 0.156609777822  
TACGAAGA 0.194184542669  
TACGAATA 0.0776968387554  
TACGACAA 0.132820147972  
TACGACCA -0.0507332688156  
TACGACGA 0.024501410778  
TACGACTA -0.321603402616  
TACGAGAA 0.213038106978  
TACGAGCA -0.151727867288  
TACGAGGA -0.0268818930972  
TACGAGTA 0.117620052116  
TACGATAA 0.121497339474  
TACGATCA 0.104805907836  
TACGATGA -0.035441777866  
TACGCAAA 0.128081136909  
TACGCACA 0.104243702693  
TACGCAGA 0.0667335751772  
TACGCATA 0.139791829376  
TACGCCAA 0.164512997846  
TACGCCCA -0.0561576937055  
TACGCCGA 0.101078469921  
TACGCCTA -0.0248746804973  
TACGCGAA 0.186819050455  
TACGCGCA 0.117876980796  
TACGCGGA 0.0979198697894

TACGCGTA 0.216791109568  
TACGCTAA 0.128727901455  
TACGCTCA 0.0397433595637  
TACGCTGA 0.0945796902444  
TACGGAAA 0.162149753059  
TACGGACA 0.0728093902772  
TACGGAGA 0.207498375948  
TACGGATA 0.209083739387  
TACGGCAA 0.112659576798  
TACGGCCA -0.0908707412095  
TACGGCGA -0.240455752103  
TACGGCTA -0.178078183264  
TACGGGAA -0.0056820752968  
TACGGGCA -0.134377248927  
TACGGGGA -0.0436304369402  
TACGGTAA 0.212890958592  
TACGGTCA 0.00368678058145  
TACGGTGA 0.0331775378804  
TACGTAAA 0.141896892769  
TACGTACA 0.0626011686618  
TACGTAGA -0.0630883995241  
TACGTATA -0.0573396203003  
TACGTCAA 0.159554871676  
TACGTCCA -0.0941462567309  
TACGTCGA 0.00389407531222  
TACGTCTA -0.0852461720117  
TACGTGAA 0.209183010591  
TACGTGCA 0.148939074327  
TACGTGGA 0.115812792421  
TACGTTAA 0.174453844076  
TACGTTCA -0.0197054079108  
TACGTTGA 0.0596811748648  
TACTAAAA 0.18071928678  
TACTAACA 0.0289183448538  
TACTAAGA 0.204931508549  
TACTAATA -0.0607232992207  
TACTACAA 0.124218304092  
TACTACCA 0.0587279110676  
TACTACGA 0.0146303328122  
TACTACTA -0.0412283532041  
TACTAGAA 0.163950451829  
TACTAGCA 0.0107488661395  
TACTAGGA 0.00172210778271  
TACTAGTA 0.188538281528  
TACTATAA 0.132662965996  
TACTATCA 0.194344482223  
TACTATGA 0.0256746202638  
TACTCAA 0.112400279067  
TACTCACA 0.168574910999  
TACTCAGA -0.0563224309502  
TACTCATA 0.0990094777974  
TACTCCAA 0.0106814803785  
TACTCCCA -0.0923824427158  
TACTCCGA -0.0725364337805

TACTCCTA -0.195133012966  
TACTCGAA 0.0523776851602  
TACTCGCA 0.100572250243  
TACTCGGA -0.0462616542758  
TACTCTAA 0.163373794734  
TACTCTCA -0.00113063217594  
TACTCTGA -0.189033654575  
TACTGAAA 0.097392485793  
TACTGACA 0.120165981767  
TACTGAGA 0.0797312463979  
TACTGATA 0.17750390848  
TACTGCAA 0.0188529761773  
TACTGCCA 0.0845173729539  
TACTGCGA -0.0827439886846  
TACTGCTA -0.114556499224  
TACTGGAA 0.0119662973014  
TACTGGCA -0.0269625480028  
TACTGGGA 0.115877024591  
TACTGTAA 0.242198346022  
TACTGTCA -0.0882250758705  
TACTGTGA 0.195154120713  
TACTTAAA 0.0699189068853  
TACTTACA 0.165287877409  
TACTTAGA -0.0324568023601  
TACTTATA -0.00347317013984  
TACTTCAA -0.00250566017905  
TACTTCCA 0.0203083144165  
TACTTCGA -0.0850307434467  
TACTTCTA 0.0217581567779  
TACTTGAA 0.112731717001  
TACTTGCA 0.109121518212  
TACTTGGA 0.0384061747698  
TACTTTAA 0.204084671315  
TACTTTCA -0.0565980307001  
TACTTTGA 0.162979642782  
TAGAAAAA 0.0180957581732  
TAGAAACA 0.151704899488  
TAGAAAGA -0.00213632510283  
TAGAAATA 0.142994515721  
TAGAACAA 0.0821113406276  
TAGAACCA -0.12610265835  
TAGAACGA 0.121730911002  
TAGAACTA 0.00388680691711  
TAGAAGAA -0.0126311102677  
TAGAAGCA 0.112210006149  
TAGAAGGA 0.0271723976847  
TAGAATAA -0.0934921133114  
TAGAATCA 0.283099904312  
TAGAATGA 0.167451197754  
TAGACAAA -0.0339649496726  
TAGACACA 0.145111420918  
TAGACAGA 0.0415621172909  
TAGACATA -0.0967455058364  
TAGACCAA -0.00721827927637

TAGACCCA -0.212646755733  
TAGACCGA -0.0623263724152  
TAGACCTA -0.120552546188  
TAGACGAA -0.0448258655126  
TAGACGCA 0.0427165828486  
TAGACGGA -0.0435132101799  
TAGACTAA -0.0854853310587  
TAGACTCA -0.0460067482747  
TAGACTGA -0.109929606009  
TAGAGAAA 0.114531887259  
TAGAGACA -0.073372270342  
TAGAGAGA 0.0490724884664  
TAGAGATA 0.24436472194  
TAGAGCAA 0.0520127296483  
TAGAGCCA -0.120284802068  
TAGAGCGA 0.0422144040641  
TAGAGCTA -0.0754998065736  
TAGAGGAA 0.101146601147  
TAGAGGCA 0.026935906513  
TAGAGGGA -0.0107892712098  
TAGAGTAA 0.234686101764  
TAGAGTCA -0.0670853922907  
TAGAGTGA -0.00197421334349  
TAGATAAA 0.128737774794  
TAGATACA 0.013742034846  
TAGATAGA 0.0527967351891  
TAGATATA 0.172897486165  
TAGATCAA -0.0668226243221  
TAGATCCA 0.122376152347  
TAGATCGA 0.114592381189  
TAGATCTA 0.146294504671  
TAGATGAA -0.0756089979272  
TAGATGCA 0.217098165734  
TAGATGGA -0.0568025060981  
TAGATTAA 0.0718280263735  
TAGATTCA 0.195627103056  
TAGATTGA 0.0214498732249  
TAGCAAAA 0.151201798501  
TAGCAACA -0.0473690357145  
TAGCAAGA 0.0805347328161  
TAGCAATA 0.1541812953  
TAGCACAA -0.0860938414624  
TAGCACCA -0.25998768277  
TAGCACGA 0.0277972015211  
TAGCACTA -0.046954446253  
TAGCAGAA -0.0857540892446  
TAGCAGCA -0.122651313571  
TAGCAGGA -0.0708951901646  
TAGCATAA -0.274641136452  
TAGCATCA -0.0930322693664  
TAGCATGA -0.15360312301  
TAGCCAAA -0.00757428669445  
TAGCCACA -0.167075376268  
TAGCCAGA -0.0214248077336

TAGCCATA -0.0829264483282  
TAGCCCAA -0.0707328964789  
TAGCCCCA -0.00233429021308  
TAGCCCGA -0.223268515532  
TAGCCCTA -0.173062081052  
TAGCCGAA 0.128294961628  
TAGCCGCA -0.105542734088  
TAGCCGGA -0.317187543321  
TAGCCTAA -0.323198180123  
TAGCCTCA 0.0509704167062  
TAGCCTGA -0.131017104259  
TAGCGAAA 0.117022999782  
TAGCGACA 0.0940513516271  
TAGCGAGA 0.173414461293  
TAGCGATA 0.213730259185  
TAGCGCAA -0.0462680311165  
TAGCGCCA -0.104080649752  
TAGCGCGA 0.000809390978903  
TAGCGCTA -0.110690768166  
TAGCGGAA 0.0219903098691  
TAGCGGCA 0.0153368904331  
TAGCGGGA -0.21161539573  
TAGCGTAA 0.21781398119  
TAGCGTCA -0.199883377584  
TAGCGTGA -0.065135070035  
TAGCTAAA -0.305332656245  
TAGCTACA 0.00559153659727  
TAGCTAGA -0.123859736178  
TAGCTATA 0.0565124353003  
TAGCTCAA -0.199374298512  
TAGCTCCA -0.198409006327  
TAGCTCGA -0.0956342016948  
TAGCTGAA -0.0347006999847  
TAGCTGCA -0.0212003725528  
TAGCTGGA -0.116993982946  
TAGCTTAA 0.00025619876937  
TAGCTTCA -0.33198926104  
TAGCTTGA 0.0329007393999  
TAGGAAAA 0.0415222676084  
TAGGAACA -0.000850712971925  
TAGGAAGA 0.122716380292  
TAGGAATA 0.177916541974  
TAGGACAA 0.0765260614731  
TAGGACCA -0.0618908887095  
TAGGACGA 0.0931496234527  
TAGGACTA -0.142616752277  
TAGGAGAA 0.203143915265  
TAGGAGCA -0.164351017227  
TAGGAGGA -0.0373129971113  
TAGGATAA 0.0178704370052  
TAGGATCA 0.132805121056  
TAGGATGA 0.0972666881758  
TAGGCAAA 0.119827303052  
TAGGCACA 0.00456919869966

TAGGCAGA 0.0208071803942  
TAGGCATA -0.0112384400342  
TAGGCCAA -0.1489652565  
TAGGCCCA -0.290775417651  
TAGGCCGA -0.181637560425  
TAGGCCTA -0.454635760677  
TAGGCGAA 0.0966045859493  
TAGGCGCA 0.119914892375  
TAGGCGGA -0.141538781232  
TAGGCTAA -0.150468460132  
TAGGCTCA 0.0786574016627  
TAGGCTGA -0.0846877248704  
TAGGGAAA -0.0649046614551  
TAGGGACA -0.2093744938  
TAGGGAGA -0.0320263059933  
TAGGGATA 0.0370558795549  
TAGGGCAA 0.0709057465895  
TAGGGCCA -0.0925057418023  
TAGGGCGA -0.22955069839  
TAGGGGAA 0.199968613826  
TAGGGGCA -0.0902290152098  
TAGGGGGA -0.0989172114912  
TAGGGTAA 0.15412436224  
TAGGGTCA -0.192522199891  
TAGGGTGA 0.0596477405266  
TAGGTAAA 0.209990982718  
TAGGTACA -0.105508545842  
TAGGTAGA 0.0508842175509  
TAGGTATA -0.0813784114743  
TAGGTCAA 0.00850669076227  
TAGGTCCA -0.265702643972  
TAGGTCGA -0.13901117773  
TAGGTGAA 0.0423129420524  
TAGGTGCA -0.0431209535558  
TAGGTGGA 0.0687802456881  
TAGGTTAA -0.0508070053525  
TAGGTTCA -0.211933420132  
TAGGTTGA 0.0643511455954  
TAGTAAAA 0.133338089684  
TAGTAACA 0.060698670832  
TAGTAAGA 0.0862484763107  
TAGTAATA 0.131844123475  
TAGTACAA -0.011539163376  
TAGTACCA -0.174041724909  
TAGTACGA 0.268101428436  
TAGTACTA -0.317089268638  
TAGTAGAA 0.282001853974  
TAGTAGCA 0.0792004554645  
TAGTAGGA 0.11136939293  
TAGTATAA -0.00422177829615  
TAGTATCA 0.0750681811288  
TAGTATGA 0.0319038046311  
TAGTCAA 0.0362662938421  
TAGTCACA 0.0157146599385

TAGTCAGA 0.00570129358008  
TAGTCATA -0.0552191309767  
TAGTCCAA -0.124599846142  
TAGTCCCA 0.0121391502376  
TAGTCCGA -0.070932281198  
TAGTCGAA 0.043312190244  
TAGTCGCA 0.0215125749645  
TAGTCGGA -0.0249593074604  
TAGTCTAA -0.108014875553  
TAGTCTCA 0.0523209159573  
TAGTCTGA 0.0320041513218  
TAGTGAAA 0.000938566664359  
TAGTGACA 0.000431561037622  
TAGTGAGA 0.0235993303001  
TAGTGATA 0.00939369121187  
TAGTGCAA 0.0971039910434  
TAGTGCCA -0.172429472049  
TAGTGCGA 0.193081173405  
TAGTGGA 0.150722347692  
TAGTGGCA 0.131998389574  
TAGTGGGA 0.0836497654679  
TAGTGTA 0.224382784989  
TAGTGTCA -0.0899899131303  
TAGTGTGA 0.0292263673058  
TAGTTAAA 0.070981657336  
TAGTTACA -0.182537319605  
TAGTTAGA 0.206675036313  
TAGTTATA -0.107674779468  
TAGTTCAA 0.0751147245891  
TAGTTCCA -0.0884863835099  
TAGTTCGA 0.00659788569869  
TAGTTGAA 0.0685870645749  
TAGTTGCA 0.18259444017  
TAGTTGGA 0.0669664154513  
TAGTTTAA 0.131082925861  
TAGTTTCA 0.0963387663044  
TAGTTTGA 0.242913712611  
TATAAAAA 0.284448515726  
TATAAACA 0.260912427579  
TATAAAGA 0.307774151922  
TATAAATA -0.00679053709357  
TATAACAA 0.209293315354  
TATAACCA -0.00947497500055  
TATAACGA 0.193425691408  
TATAAGAA 0.29603018997  
TATAAGCA 0.107433413867  
TATAAGGA -0.0163886922184  
TATAATA 0.0281921039497  
TATAATCA 0.18276316116  
TATAATGA 0.179489406762  
TATACAAA 0.18729335396  
TATACACA 0.190232505888  
TATACAGA 0.187526366727  
TATACATA 0.18509302716



TATACCAA -0.0245014479464  
TATACCCA 0.0964847485092  
TATACCGA 0.133993416203  
TATACGAA 0.27339047036  
TATACGCA 0.235018941191  
TATACGGA 0.0498473680292  
TATACTAA -0.00761516171179  
TATACTCA 0.218933809843  
TATACTGA 0.14762558702  
TATAGAAA 0.083746341321  
TATAGACA 0.169804791017  
TATAGAGA 0.0708269161989  
TATAGATA 0.254936754937  
TATAGCAA 0.103724937058  
TATAGCCA 0.0603730452215  
TATAGCGA 0.215687977636  
TATAGGAA 0.178252301045  
TATAGGCA 0.152337540054  
TATAGGGA -0.0159916206214  
TATAGTAA 0.20944013878  
TATAGTCA -0.138071692682  
TATAGTGA 0.0650197440932  
TATATAAA 0.226911089538  
TATATACA 0.277641343437  
TATATAGA 0.145866937985  
TATATATA 0.0123223277851  
TATATCAA 0.124453155922  
TATATCCA 0.269846981968  
TATATCGA 0.135410284914  
TATATGAA 0.274725138362  
TATATGCA 0.231943096137  
TATATGGA 0.0261806089783  
TATATTAA 0.255634548149  
TATATTCA 0.0995474551652  
TATATTGA 0.297075464675  
TATCAAAA 0.283135583368  
TATCAACA 0.148811345781  
TATCAAGA 0.265211492484  
TATCAATA 0.180401159099  
TATCACAA 0.244587562769  
TATCACCA 0.145698039637  
TATCACGA 0.173064093487  
TATCAGAA 0.266410954505  
TATCAGCA 0.163405910819  
TATCAGGA 0.218619445892  
TATCATAA 0.198678131136  
TATCATCA 0.0925640962001  
TATCATGA 0.236621825799  
TATCCAAA 0.319839122869  
TATCCACA 0.23439003742  
TATCCAGA 0.248487259403  
TATCCATA 0.266209499062  
TATCCCAA 0.229185492288  
TATCCCCA 0.271896296548

TATCCCGA 0.0830987460958  
TATCCGAA 0.279071082101  
TATCCGCA 0.289119946279  
TATCCGGA 0.340060446121  
TATCCTAA 0.129280715686  
TATCCTCA 0.238491699134  
TATCCTGA 0.277829682562  
TATCGAAA 0.161620297984  
TATCGACA 0.237415101051  
TATCGAGA 0.160664365014  
TATCGATA 0.161972607422  
TATCGCAA 0.190743998307  
TATCGCCA 0.179867195019  
TATCGCGA 0.315297475238  
TATCGGAA 0.345860309628  
TATCGGCA 0.196277544762  
TATCGGGA 0.148857008116  
TATCGTAA 0.215112033639  
TATCGTCA 0.0959212571987  
TATCGTGA 0.232368732369  
TATCTAAA 0.186146201298  
TATCTACA 0.291870251016  
TATCTAGA 0.292748671537  
TATCTCAA 0.125447617935  
TATCTCCA 0.296325627906  
TATCTCGA 0.27702970008  
TATCTGAA 0.25738925425  
TATCTGCA 0.367572806967  
TATCTGGA 0.373796661675  
TATCTTAA 0.315282877017  
TATCTTCA 0.21331722663  
TATCTTGA 0.274590017014  
TATGAAAA 0.290821771612  
TATGAACA 0.0350352501342  
TATGAAGA 0.150877718006  
TATGAATA 0.0697212363879  
TATGACAA 0.100801903832  
TATGACCA -0.128711043259  
TATGACGA 0.0337513822362  
TATGAGAA 0.275180138817  
TATGAGCA 0.0717315111255  
TATGAGGA -0.00686773282337  
TATGATAA 0.160343204163  
TATGATCA 0.0353425050395  
TATGATGA 0.0802323994342  
TATGCAAA 0.141146544236  
TATGCACA 0.164717058656  
TATGCAGA 0.0566520441158  
TATGCATA 0.190485995683  
TATGCCAA 0.0731213306971  
TATGCCCA 0.102324614736  
TATGCCGA 0.0376285376285  
TATGCGAA 0.264633345046  
TATGCGCA 0.182298927761

TATGCGGA -0.0165418924322  
TATGCTAA -0.0875652690537  
TATGCTCA -0.106189566325  
TATGCTGA -0.0916694031539  
TATGGAAA 0.18296671327  
TATGGACA 0.18489701823  
TATGGAGA -0.144361206279  
TATGGCAA 0.0697232907309  
TATGGCCA -0.0873994667637  
TATGGCGA 0.0307467057101  
TATGGGAA 0.0964234359832  
TATGGGCA 0.155444041371  
TATGGGGA 0.0841874084919  
TATGGTAA 0.170608672803  
TATGGTCA -0.105565895962  
TATGGTGA 0.141257490712  
TATGTAAA 0.12127140915  
TATGTACA 0.15517962089  
TATGTAGA 0.0578053035335  
TATGTCAA -0.0225892194897  
TATGTCCA -0.0188825188825  
TATGTCSA -0.0726053487196  
TATGTGAA 0.149998905133  
TATGTGCA 0.164121223623  
TATGTGGA 0.00759161365222  
TATGTTAA 0.17059991387  
TATGTTCA -0.0075455368886  
TATGTTGA -0.0634367149519  
TATTAATA 0.247332307616  
TATTAACA 0.228621645947  
TATTAAGA 0.280769750467  
TATTAATA 0.220186659831  
TATTACAA 0.221502385932  
TATTACCA 0.0444011504618  
TATTACGA 0.250455099523  
TATTAGAA 0.297807529096  
TATTAGCA 0.213404815953  
TATTAGGA 0.193638825427  
TATTATAA 0.23757071013  
TATTATCA 0.101509455997  
TATTATGA 0.0766730918246  
TATTCAAA -0.00911199967604  
TATTCACA 0.256395904009  
TATTCAGA 0.143603312219  
TATTCCAA 0.200970051751  
TATTCCCA 0.28030262111  
TATTCGGA 0.189218484267  
TATTCGAA 0.0505762647533  
TATTCGCA 0.291678731073  
TATTCGGA -0.0742684833594  
TATTCTAA -0.0463381809211  
TATTCTCA 0.305312292432  
TATTCTGA 0.0933607293271  
TATTGAAA 0.153805320472

TATTGACA 0.104379466143  
TATTGAGA 0.216567807477  
TATTGCAA 0.0753659996084  
TATTGCCA 0.0666217181369  
TATTGCGA 0.18853702187  
TATTGGAA 0.197939672929  
TATTGGCA 0.168458354927  
TATTGGGA -0.0197235803296  
TATTGTAA 0.205454625081  
TATTGTCA 0.195104486763  
TATTGTGA 0.236528397188  
TATTTAAA 0.0749640518821  
TATTTACA 0.325759643941  
TATTTAGA 0.176877979908  
TATTTCAA 0.0751730898082  
TATTTCCA 0.287657204587  
TATTTCGA 0.303537148822  
TATTTGAA 0.146883644884  
TATTTGCA 0.369574658163  
TATTTGGA 0.0304175282713  
TATTTTAA 0.289940938531  
TATTTTCA 0.317042938255  
TATTTTGA 0.223012879371  
TCAAAAAA 0.225827901579  
TCAAAACA 0.159630811004  
TCAAAAGA 0.0920400109211  
TCAAACAA 0.00638161208149  
TCAAACCA -0.0189706940619  
TCAAACGA 0.0774953833128  
TCAAAGAA 0.119090164545  
TCAAAGCA 0.139366639367  
TCAAAGGA 0.108495563199  
TCAAATAA 0.0822434004252  
TCAAATCA 0.221309899  
TCAAATGA 0.0625292876798  
TCAACAAA 0.26387670343  
TCAACACA -0.0083359000597  
TCAACAGA 0.21576517676  
TCAACCAA -0.0644267434262  
TCAACCCA -0.159905442114  
TCAACCGA 0.0208652178349  
TCAACGAA 0.0944655053872  
TCAACGCA 0.0285913447151  
TCAACGGA 0.271383108399  
TCAACTAA -0.0154753731323  
TCAACTCA -0.194926235632  
TCAACTGA 0.010946848776  
TCAAGAAA -0.0716814305683  
TCAAGACA 0.0937402830595  
TCAAGAGA -0.076541521504  
TCAAGCAA -0.0236270641659  
TCAAGCCA -0.219399988034  
TCAAGCGA -0.0544637708663  
TCAAGGAA 0.252661752662

TCAAGGCA 0.01460041021  
TCAAGGGA 0.169438033074  
TCAAGTAA 0.0737169676564  
TCAAGTCA -0.0408184086804  
TCAAGTGA 0.0418566768862  
TCAATAAA 0.100029781848  
TCAATACA 0.00130143135552  
TCAATAGA -0.0348729589863  
TCAATCAA -0.00130040795319  
TCAATCCA -0.0851939170837  
TCAATCGA -0.0993533799341  
TCAATGAA 0.0155171784559  
TCAATGCA 0.0878426019868  
TCAATGGA 0.179084399612  
TCAATTAA 0.0774203956022  
TCAATTCA 0.0555531429139  
TCAATTGA 0.154668287399  
TCACAAAA 0.153819108365  
TCACAACA 0.147517207652  
TCACAAGA 0.218756979428  
TCACACAA 0.101471500624  
TCACACCA 0.057276284549  
TCACACGA -0.00796349147261  
TCACAGAA 0.00564889958829  
TCACAGCA 0.283618329073  
TCACAGGA 0.166554761479  
TCACATAA 0.074838507186  
TCACATCA -0.0215711579348  
TCACATGA 0.075556272526  
TCACCAA 0.0710234244668  
TCACCACA 0.0963241680839  
TCACCAGA 0.248408429013  
TCACCCAA -0.119771375634  
TCACCCCA 0.00633781018046  
TCACCCGA -0.053418577342  
TCACCGAA 0.0638503517291  
TCACCGCA 0.0327945024915  
TCACCGGA -0.0240474634414  
TCACCTAA -0.10278791037  
TCACCTCA 0.00356417023084  
TCACCTGA 0.0548330699846  
TCACGAAA 0.145488055006  
TCACGACA -0.108995251906  
TCACGAGA 0.12860714617  
TCACGCAA 0.0084209742544  
TCACGCCA -0.0321836988504  
TCACGCGA -0.0322788353091  
TCACGGAA 0.127035904323  
TCACGGCA 0.100543053802  
TCACGGGA 0.121205728326  
TCACGTAA 0.179598256972  
TCACGTCA 0.0656912622351  
TCACGTGA 0.103359958326  
TCACTAAA 0.00758471970593

TCACTACA -0.0774730804759  
TCACTAGA 0.0821587214929  
TCACTCAA -0.0790791955135  
TCACTCCA -0.0595176058959  
TCACTCGA -0.1274826083  
TCACTGAA 0.165709510011  
TCACTGCA -0.0191516940283  
TCACTGGA 0.118384224445  
TCACTTAA -0.06775662925  
TCACTTCA 0.256450665542  
TCAGAAAA 0.17671656825  
TCAGAACA -0.182383539666  
TCAGAAGA 0.218613461019  
TCAGACAA -0.104007941432  
TCAGACCA -0.132439661827  
TCAGACGA -0.113852706447  
TCAGAGAA 0.119266731385  
TCAGAGCA -0.21244448855  
TCAGAGGA -0.0611435110504  
TCAGATAA 0.0286963049359  
TCAGATCA -0.0412933594752  
TCAGATGA 0.0503748093107  
TCAGCAAA -0.0392757822821  
TCAGCACA -0.108570506935  
TCAGCAGA 0.150973287337  
TCAGCCAA -0.129627743146  
TCAGCCCA -0.2806059303  
TCAGCCGA -0.152515473155  
TCAGCGAA 0.25716152201  
TCAGCGCA 0.000951074064072  
TCAGCGGA 0.0691393873212  
TCAGCTAA -0.0609218153129  
TCAGCTCA -0.293641227979  
TCAGCTGA 0.0477054787913  
TCAGGAAA 0.117900824136  
TCAGGACA -0.0724629114765  
TCAGGAGA 0.0547944638854  
TCAGGCAA -0.0443432413129  
TCAGGCCA -0.0873610776652  
TCAGGCCGA -0.0238384407539  
TCAGGGAA 0.114350050729  
TCAGGGCA -0.274568912046  
TCAGGGGA -0.0667784348273  
TCAGGTAA 0.0575804909382  
TCAGGTCA -0.104304339076  
TCAGTAAA 0.00512299120209  
TCAGTACA -0.0093440547986  
TCAGTAGA 0.0922541842149  
TCAGTCAA -0.153554954493  
TCAGTCCA -0.204155811934  
TCAGTCGA -0.0947611051832  
TCAGTGAA 0.134352433184  
TCAGTGCA 0.0835036138066  
TCAGTGGA 0.11961961962

TCAGTTAA -0.0458006941261  
TCAGTTCA -0.104823065234  
TCATAAAA 0.158195385468  
TCATAACA -0.000372944721885  
TCATAAGA 0.138218141209  
TCATACAA -0.0247417939753  
TCATACCA -0.0636927658518  
TCATACGA 0.0819428243671  
TCATAGAA 0.0423757090424  
TCATAGCA 0.114246477883  
TCATAGGA -0.0980952538513  
TCATATAA 0.0667452537536  
TCATATCA 0.113395764911  
TCATATGA -0.0683312247277  
TCATCAAA 0.197723407517  
TCATCACA 0.00312036962694  
TCATCAGA 0.173273824789  
TCATCCAA -0.0210196422318  
TCATCCCA -0.169289518733  
TCATCCGA 0.0604723180481  
TCATCGAA 0.13052032749  
TCATCGCA -0.0566295790765  
TCATCGGA 0.0936360026801  
TCATCTAA 0.0426611096107  
TCATCTCA -0.119340440607  
TCATGAAA 0.209494618586  
TCATGACA 0.0635525332495  
TCATGAGA 0.111136873979  
TCATGCAA 0.00985257988845  
TCATGCCA -0.0262491721822  
TCATGCGA -0.0539241230625  
TCATGGAA 0.168654880776  
TCATGGCA -0.0554464750986  
TCATGGGA -0.104567947181  
TCATGTAA -0.0391969518916  
TCATGTCA -0.0251008584342  
TCATTAAA -0.000169591078682  
TCATTACA 0.0242031196397  
TCATTAGA -0.0999277514429  
TCATTCAA -0.0306049851504  
TCATTCCA -0.137543188198  
TCATTCGA 0.0886520128944  
TCATTGAA 0.0902612347701  
TCATTGCA -0.0317426377543  
TCATTGGA 0.1349014815  
TCATTTAA 0.018697761122  
TCATTTCA -0.111327581025  
TCCAAAAA 0.0841288146975  
TCCAAACA 0.0373389918844  
TCCAAAGA 0.259316219353  
TCCAACAA 0.112288781997  
TCCAACCA -0.0218392325869  
TCCAACGA -0.134072075938  
TCCAAGAA 0.142334487208

TCCAAGCA 0.12256185324  
TCCAAGGA 0.00507808083566  
TCCAATAA 0.180101589192  
TCCAATCA -0.0635344036128  
TCCACAAA 0.159935913812  
TCCACACA 0.0636803573644  
TCCACAGA 0.127005639238  
TCCACCAA 0.0721816310592  
TCCACCCA -0.0311929781023  
TCCACCGA 0.0165507324657  
TCCACGAA 0.193704517419  
TCCACGCA 0.0749057187905  
TCCACGGA 0.0346399252878  
TCCACTAA 0.25813084385  
TCCACTCA -0.0194021908457  
TCCAGAAA 0.157661564748  
TCCAGACA -0.0321569216502  
TCCAGAGA 0.189164470851  
TCCAGCAA 0.179294613987  
TCCAGCCA -0.179701909795  
TCCAGCGA 0.151676469858  
TCCAGGAA 0.192438851704  
TCCAGGCA -0.119219137257  
TCCAGGGA 0.0638668972002  
TCCAGTAA 0.235824762961  
TCCAGTCA 0.135543747217  
TCCATAAA -0.0808786427443  
TCCATACA 0.118119496907  
TCCATAGA 0.117453632402  
TCCATCAA -0.0603605838812  
TCCATCCA 0.0340243444955  
TCCATCGA 0.219670972622  
TCCATGAA 0.273710349468  
TCCATGCA -0.0581922503748  
TCCATGGA 0.0728268269758  
TCCATTAA 0.144622215488  
TCCATTCA -0.0977827332953  
TCCCAAAA 0.304395524186  
TCCCAACA 0.0309328237834  
TCCCAAGA 0.227603045189  
TCCCACAA 0.134918943381  
TCCCACCA 0.047931607812  
TCCCACGA -0.309371300447  
TCCCAGAA 0.0852243428001  
TCCCAGCA 0.0845410328312  
TCCCAGGA -0.0101085377692  
TCCCATAA -0.0106575119604  
TCCCATCA 0.0170404564344  
TCCCAAAA 0.233909492651  
TCCCCACA 0.0373163087604  
TCCCCAGA 0.0417122252797  
TCCCCCAA -0.215815835683  
TCCCCCCA -0.0619370207697  
TCCCCCGA 0.157883779096



TCCCCGAA 0.12203250082  
TCCCCGCA 0.134059584941  
TCCCCGGA -0.0187847876575  
TCCCCTAA 0.171227637351  
TCCCCTCA -0.0958496221291  
TCCCGAAA -0.0723130150435  
TCCCGACA 0.175110936359  
TCCCGAGA 0.145066554157  
TCCCGCAA 0.145135183577  
TCCCGCCA 0.0399088240403  
TCCCGCGA 0.0908118800318  
TCCCGGAA 0.313866849631  
TCCCGGCA -0.0120208410867  
TCCCGGGA 0.152661672413  
TCCCGTAA 0.0103396230822  
TCCCGTCA 0.0248994962404  
TCCCTAAA 0.163493500142  
TCCCTACA 0.0754991410996  
TCCCTAGA 0.0753990788523  
TCCCTCAA 0.0315514390258  
TCCCTCCA -0.0153903624489  
TCCCTCGA 0.137605015949  
TCCCTGAA -0.0280857194733  
TCCCTGCA -0.0395832451533  
TCCCTTAA -0.116841074851  
TCCCTTCA 0.0468601516096  
TCCGAAAA 0.0539534024383  
TCCGAACA 0.0944205601337  
TCCGAAGA 0.0798242169538  
TCCGACAA 0.0404363408101  
TCCGACCA -0.196420350384  
TCCGACGA 0.0374758216973  
TCCGAGAA 0.0442433679927  
TCCGAGCA 0.0621643321679  
TCCGAGGA -0.0722995531074  
TCCGATAA -0.0939035017933  
TCCGATCA -0.0324613329635  
TCCGAAA 0.122940476455  
TCCGCACA 0.083300764287  
TCCGCAGA 0.109446912477  
TCCGCCAA -0.0384829160567  
TCCGCCCA -0.0240750849855  
TCCGCCGA 0.221652810522  
TCCGCGAA 0.0962073823201  
TCCGCGCA -0.00687216141762  
TCCGCGGA 0.110820316484  
TCCGCTAA 0.00309979400888  
TCCGCTCA -0.168792949465  
TCCGGAAA 0.185658982058  
TCCGGACA -0.0322451386689  
TCCGGAGA -0.0618033124269  
TCCGGCAA -0.115531466786  
TCCGGCCA -0.0966893186511  
TCCGGCGA 0.111246469055

TCCGGGAA 0.118110506318  
TCCGGGCA 0.0941009880404  
TCCGGTAA 0.037979988475  
TCCGGTCA -0.213314644372  
TCCGTAAA 0.011689593656  
TCCGTACA 0.143337552428  
TCCGTAGA -0.0204907921724  
TCCGTCAA -0.0785586140553  
TCCGTCCA -0.0259420110022  
TCCGT CGA -0.0635897605595  
TCCGTGAA 0.128132264496  
TCCGTGCA 0.108335583892  
TCCGTTAA -0.026330738452  
TCCGTTCA 0.0805364593243  
TCCTAAAA 0.132837237141  
TCCTAACA 0.143213652256  
TCCTAAGA 0.0229973005986  
TCCTACAA -0.0991530627434  
TCCTACCA 0.068367372261  
TCCTACGA -0.125668957873  
TCCTAGAA 0.0591425005292  
TCCTAGCA 0.116973615627  
TCCTAGGA -0.0907013518541  
TCCTATAA 0.113100443056  
TCCTATCA -0.0234577416167  
TCCTCAAA 0.188033108764  
TCCTCACA -0.00489490532794  
TCCTCAGA 0.189642810855  
TCCTCCAA -0.0493281477931  
TCCTCCCA -0.0545560821746  
TCCTCCGA 0.0738633460581  
TCCTCGAA 0.103087691429  
TCCTCGCA -0.0341021729451  
TCCTCTAA 0.171777293871  
TCCTCTCA -0.125748594766  
TCCTGAAA 0.106120734812  
TCCTGACA 0.0595981090404  
TCCTGAGA 0.0111347926688  
TCCTGCAA 0.0385756178448  
TCCTGCCA -0.0840460207011  
TCCTGCGA 0.0993897943841  
TCCTGGAA 0.0814726098881  
TCCTGGCA 0.196117605209  
TCCTGTAA 0.0491485587907  
TCCTGTCA 0.0227015012719  
TCCTTAAA 0.0736502120392  
TCCTTACA 0.156193299013  
TCCTTAGA -0.0162135135727  
TCCTTCAA 0.0311518725867  
TCCTTCCA -0.0817609477732  
TCCTTCGA -0.00593344671285  
TCCTTGAA 0.00791734487566  
TCCTTGCA 0.107059699423  
TCCTTTAA -0.0123858601636

TCCTTTCA -0.0224891305909  
TCGAAAAA 0.0416246359569  
TCGAAACA 0.0948234710189  
TCGAAAGA -0.0408416040312  
TCGAACAA 0.019431277007  
TCGAACCA -0.287016997485  
TCGAACGA -0.172704977263  
TCGAAGAA 0.00774216622994  
TCGAAGCA 0.0498375947972  
TCGAATAA -0.101980978519  
TCGAATCA 0.182453668898  
TCGACAAA -0.0398305146603  
TCGACACA -0.269062586204  
TCGACAGA 0.257628665066  
TCGACCAA -0.154988681826  
TCGACCCA -0.308640020547  
TCGACCGA -0.0949078095144  
TCGACGAA -0.0631497120501  
TCGACGCA -0.0734852521478  
TCGACTAA 0.0464420487143  
TCGACTCA -0.216424967784  
TCGAGAAA 0.0606625909656  
TCGAGACA -0.184255824628  
TCGAGAGA 0.116414239104  
TCGAGCAA -0.147600363752  
TCGAGCCA -0.254372038796  
TCGAGCGA -0.258872375092  
TCGAGGAA -0.0162046802492  
TCGAGGCA -0.218660314782  
TCGAGTAA 0.0486809123173  
TCGAGTCA -0.140224047467  
TCGATAAA -0.112160369736  
TCGATACA -0.0177767298979  
TCGATAGA 0.172272869937  
TCGATCAA -0.23936236199  
TCGATCCA -0.172903292652  
TCGATCGA 0.00566015893098  
TCGATGAA 0.0525674620264  
TCGATGCA -0.311172859415  
TCGATTAA -0.0395450546966  
TCGATTCA 0.112130036372  
TCGCAAAA -0.0156967365678  
TCGCAACA 0.037099187609  
TCGCAAGA 0.1351320774  
TCGCACAA 0.0587446951083  
TCGCACCA 0.107178826668  
TCGCACGA 0.189349868251  
TCGCAGAA -0.116108230014  
TCGCAGCA 0.0422860877406  
TCGCATAA 0.0450518530323  
TCGCATCA -0.0632216238277  
TCGCCAAA -0.032650866526  
TCGCCACA -0.20549703642  
TCGCCAGA 0.195631561965

TCGCCCAA -0.0599614606979  
TCGCCCA 0.0500001959332  
TCGCCGA -0.0113827273298  
TCGCCGAA -0.120756010122  
TCGCCGCA -0.18621953136  
TCGCCTAA -0.0524495328071  
TCGCCTCA -0.0917928117234  
TCGCGAAA 0.0739596943133  
TCGCGACA -0.152835339372  
TCGCGAGA 0.0585819288629  
TCGCGCAA 0.205890463466  
TCGCGCCA -0.215856771149  
TCGCGCGA 0.232096346092  
TCGCGGAA 0.15720817236  
TCGCGGCA -0.0179945786006  
TCGCGTAA 0.105278716524  
TCGCGTCA 0.0816383582841  
TCGCTAAA 0.0629375932406  
TCGCTACA -0.0408202740086  
TCGCTAGA 0.0484603060361  
TCGCTCAA -0.1759327239  
TCGCTCCA -0.184564826154  
TCGCTGAA -0.132119016304  
TCGCTGCA -0.172061065756  
TCGCTTAA 0.00262986941892  
TCGCTTCA -0.0315737611585  
TCGGAAAA 0.120320044562  
TCGGAACA -0.0389867375167  
TCGGAAGA 0.0400480281454  
TCGGACAA -0.078059379694  
TCGGACCA -0.0812702824167  
TCGGACGA -0.0501660547579  
TCGGAGAA -0.0687144842304  
TCGGAGCA 0.0224508254811  
TCGGATAA -0.0191724917621  
TCGGATCA 0.15215652212  
TCGGCAAA 0.109701977329  
TCGGCACA -0.17575312131  
TCGGCAGA 0.108945033187  
TCGGCCAA -0.043169998701  
TCGGCCCA -0.00676814051923  
TCGGCCGA 0.181972662549  
TCGGCGAA 0.119832121498  
TCGGCGCA 0.124386094083  
TCGGCTAA -0.0126252829602  
TCGGCTCA -0.18965511895  
TCGGGAAA 0.227229330745  
TCGGGACA -0.143290124169  
TCGGGAGA -0.021587212162  
TCGGGCAA -0.0943811642995  
TCGGGCCA -0.096243350336  
TCGGGGAA 0.19910406274  
TCGGGGCA 0.111870823992  
TCGGGTAA 0.0255573959652

TCGGGTCA -0.159109897837  
TCGGTAAA 0.0596560748076  
TCGGTACA 0.098778542162  
TCGGTAGA 0.0682852849127  
TCGGTCAA -0.0358375824211  
TCGGTCCA -0.229626229291  
TCGGTGAA 0.151391542795  
TCGGTGCA -0.117440504256  
TCGGTTAA -0.0033215033215  
TCGGTTCA -0.135014165464  
TCGTAAAA 0.127332566727  
TCGTAAACA 0.115152397884  
TCGTAAAGA 0.25539451297  
TCGTACAA 0.112107975744  
TCGTACCA -0.0526478333402  
TCGTACGA -0.0713431725164  
TCGTAGAA 0.0549482591756  
TCGTAGCA 0.111573469194  
TCGTATAA 0.0479909970752  
TCGTATCA 0.2343155828  
TCGTCAAA 0.134819675482  
TCGTCACA -0.140615222611  
TCGTCAGA 0.0708999073013  
TCGTCCAA -0.155991231336  
TCGTCCCA -0.191132725162  
TCGTCGAA 0.066370778492  
TCGTGCA 0.0370437005236  
TCGTCTAA -0.00780493857799  
TCGTCTCA -0.212041579156  
TCGTGAAA 0.108373539266  
TCGTGACA -0.0278623799717  
TCGTGAGA 0.185779443355  
TCGTGCAA 0.02262067254  
TCGTGCCA -0.244415775589  
TCGTGGAA 0.050932461333  
TCGTGGCA 0.0188439127833  
TCGTGTAA 0.162956285629  
TCGTGTCA 0.112569067831  
TCGTTAAA -0.0216483701332  
TCGTTACA 0.0458493609629  
TCGTTAGA 0.187361590622  
TCGTTCAA 0.00342109296877  
TCGTTCCA -0.198121817194  
TCGTTGAA 0.0418238330397  
TCGTTGCA 0.0375955271052  
TCGTTTAA -0.0634104275753  
TCGTTTCA -0.0681456874919  
TCTAAAAA 0.152669553565  
TCTAAACA 0.165775968806  
TCTAAAGA 0.0564186776308  
TCTAACAA 0.0903231054746  
TCTAACCA 0.0578939821364  
TCTAAGAA 0.0403545907754  
TCTAAGCA -0.0867160248721

TCTAATAA 0.29198068592  
TCTAATCA 0.0737721192267  
TCTACAAA 0.0868097778881  
TCTACACA 0.0676824595082  
TCTACAGA 0.0928352595019  
TCTACCAA 0.148922509794  
TCTACCCA 0.0655416934882  
TCTACGAA 0.113579466578  
TCTACGCA 0.0425939577965  
TCTACTAA 0.305833381591  
TCTACTCA 0.0949636139355  
TCTAGAAA 0.0403020371817  
TCTAGACA 0.0412740732226  
TCTAGAGA 0.156584959615  
TCTAGCAA 0.0196280373422  
TCTAGCCA 0.0886299522663  
TCTAGGAA 0.128986226579  
TCTAGGCA -0.0390784347783  
TCTAGTAA 0.17683043437  
TCTAGTCA -0.0715601211991  
TCTATAAA -0.0094399392714  
TCTATACA 0.243290292913  
TCTATAGA 0.00514196566143  
TCTATCAA -0.0651707943519  
TCTATCCA 0.069106296379  
TCTATGAA -0.0453807580856  
TCTATGCA 0.1163704444443  
TCTATTAA 0.227256371442  
TCTATTCA 0.167420421451  
TCTCAAAA 0.243907807542  
TCTCAACA 0.0553035874539  
TCTCAAGA 0.0243169857594  
TCTCACAA 0.0453941980793  
TCTCACCA 0.0615453676197  
TCTCAGAA -0.0371020402802  
TCTCAGCA 0.0267012787597  
TCTCATAA 0.122013197771  
TCTCATCA 0.159690663708  
TCTCCAAA -0.0419147386505  
TCTCCACA 0.228488819398  
TCTCCAGA 0.211031195422  
TCTCCCAA 0.0334111888632  
TCTCCCCA 0.108404547798  
TCTCCGAA 0.000536640444698  
TCTCCGCA -0.0529341696725  
TCTCCTAA 0.0950732478017  
TCTCCTCA -0.0200606088032  
TCTCGAAA 0.200879943304  
TCTCGACA 0.0220489995181  
TCTCGAGA 0.213400533078  
TCTCGCAA 0.0601750750676  
TCTCGCCA 0.0949285782063  
TCTCGGAA 0.202724757852  
TCTCGGCA 0.13157923764

TCTCGTAA 0.284439756794  
TCTCGTCA 0.0239783070444  
TCTCTAAA -0.0767011828922  
TCTCTACA -0.0321664489099  
TCTCTCAA -0.140587825003  
TCTCTCCA -0.133692574488  
TCTCTGAA 0.227080428896  
TCTCTGCA 0.139721757918  
TCTCTTAA 0.141467705087  
TCTCTTCA -0.114305625488  
TCTGAAAA 0.213912834026  
TCTGAACA 0.176757443268  
TCTGAAGA 0.120233133581  
TCTGACAA 0.176666934301  
TCTGACCA 0.229787638879  
TCTGAGAA 0.260717648519  
TCTGAGCA 0.119583771099  
TCTGATAA 0.264866462778  
TCTGATCA 0.135544635545  
TCTGCAAA 0.185710531886  
TCTGCACA 0.351350596819  
TCTGCAGA 0.24886920857  
TCTGCCAA 0.0271373619556  
TCTGCCCA 0.03153924415  
TCTGCGAA 0.155029685333  
TCTGCGCA -0.154638320324  
TCTGCTAA 0.219030970125  
TCTGCTCA 0.0668919608314  
TCTGGAAA 0.184668139214  
TCTGGACA 0.317472610089  
TCTGGCAA -0.00458680780071  
TCTGGCCA -0.0336126344464  
TCTGGGAA 0.165969358335  
TCTGGGCA 0.0115004811975  
TCTGGTAA 0.140883776268  
TCTGGTCA 0.0273754140215  
TCTGTAAA 0.096633650358  
TCTGTACA 0.152976942111  
TCTGTCAA -0.0412500310151  
TCTGTCCA -0.015330757755  
TCTGTGAA 0.127529661022  
TCTGTGCA 0.114700554267  
TCTGTTAA 0.237961101597  
TCTGTTCA 0.0129384905313  
TCTTAAAA 0.130078173471  
TCTTAACA 0.189565921914  
TCTTAAGA 0.111099397217  
TCTTACAA 0.0807303489705  
TCTTACCA 0.161151945578  
TCTTAGAA 0.274019198262  
TCTTAGCA 0.126455512266  
TCTTATAA 0.19462851281  
TCTTATCA 0.207358233031  
TCTTCAA 0.203422552791

TCTTCACA 0.204059431332  
TCTTCCAA 0.102008715138  
TCTTCCCA 0.133405026816  
TCTTCGAA 0.141168394666  
TCTTCGCA 0.0982569724751  
TCTTCTAA 0.116595257038  
TCTTCTCA -0.0182983827605  
TCTTGAAA 0.117129551908  
TCTTGACA 0.202806660545  
TCTTGCAA 0.16506718831  
TCTTGCCA 0.124676831894  
TCTTGGA 0.32697022091  
TCTTGGCA 0.143208813775  
TCTTGTA 0.236253950643  
TCTTGTCA 0.138667766399  
TCTTTAAA 0.158779992113  
TCTTTACA 0.250802537171  
TCTTTCAA -0.0268436480558  
TCTTTCCA 0.00621082903883  
TCTTTGAA 0.220070696211  
TCTTTGCA 0.13227374583  
TCTTTTAA 0.192730816114  
TCTTTTCA 0.210349467925  
TGAAAAAA 0.250196477469  
TGAAAACA -0.0101172967015  
TGAAACAA 0.0362670890418  
TGAAACCA -0.0624809320209  
TGAAAGAA -0.0513920253231  
TGAAAGCA -0.0150536676938  
TGAAATA 0.0857754939673  
TGAAATCA 0.34458590073  
TGAACAAA 0.00678160332255  
TGAACACA 0.00791734487566  
TGAACCAA -0.0325138865572  
TGAACCCA -0.125605553504  
TGAACGAA -0.032749002446  
TGAACGCA -0.158918394302  
TGAACTAA -0.106660525075  
TGAACTCA -0.17345300525  
TGAAGAAA 0.14499171551  
TGAAGACA 0.0364335087553  
TGAAGCAA -0.170065748666  
TGAAGCCA -0.354611688623  
TGAAGGAA -0.116631903748  
TGAAGGCA -0.290500960682  
TGAAGTAA -0.000978810682978  
TGAAGTCA -0.206977487796  
TGAATAAA 0.133247572642  
TGAATACA -0.0822517805296  
TGAATCAA 0.0310467653993  
TGAATCCA 0.194129391099  
TGAATGAA 0.0513295329299  
TGAATGCA 0.0386626295717  
TGAATTAA -0.0461825461825



TGAATTCA 0.167705809553  
TGACAAAA 0.305864105166  
TGACAACA -0.0699045696812  
TGACACAA 0.0216221542594  
TGACACCA -0.104920961858  
TGACAGAA 0.146246797762  
TGACAGCA 0.0704409643804  
TGACATAA 0.0414348590907  
TGACATCA -0.167173910047  
TGACCAA 0.0572564853846  
TGACCACA -0.111011843212  
TGACCCAA -0.115491524582  
TGACCCCA -0.240173739479  
TGACCGAA -0.0299591979738  
TGACCGCA -0.319951703862  
TGACCTAA 0.0251111289534  
TGACCTCA -0.271337572595  
TGACGAAA 0.177682970446  
TGACGACA -0.139177412003  
TGACGCAA 0.0725615422585  
TGACGCCA -0.288796518831  
TGACGGAA 0.112621621424  
TGACGGCA -0.15893595141  
TGACGTAA 0.0500594877484  
TGACGTCA -0.209304690795  
TGACTAAA 0.0380655898046  
TGACTACA -0.0774893350651  
TGACTCAA -0.109512759328  
TGACTCCA -0.085458315068  
TGACTGAA 0.0124311146471  
TGACTGCA -0.288565407556  
TGACTTAA 0.103053577189  
TGAGAAAA 0.200775155321  
TGAGAACA -0.0219944088816  
TGAGACAA -0.183760789795  
TGAGACCA -0.171857278607  
TGAGAGAA 0.0114516551543  
TGAGAGCA -0.245932005302  
TGAGATAA -0.0799463375221  
TGAGATCA 0.133978817982  
TGAGCAA 0.143120223645  
TGAGCACA -0.0471033481019  
TGAGCCAA -0.257052854635  
TGAGCCCA -0.286229034588  
TGAGCGAA 0.0131740576222  
TGAGCGCA -0.055465208791  
TGAGCTAA -0.117429788642  
TGAGCTCA -0.209494903147  
TGAGGAAA 0.0781990175398  
TGAGGACA -0.17841424482  
TGAGGCAA -0.0650962617415  
TGAGGCCA -0.43527879712  
TGAGGGAA 0.188374324738  
TGAGGGCA -0.167548582644

TGAGGTAA 0.118306168478  
TGAGTAAA 0.0536418910535  
TGAGTACA 0.0475135580973  
TGAGTCAA -0.246303919866  
TGAGTCCA -0.299335945766  
TGAGTGAA -0.0747317014789  
TGAGTGCA -0.251275806162  
TGAGTTAA -0.153364941778  
TGATAAAA 0.206213732546  
TGATAACA 0.0202778536112  
TGATACAA 0.0950904537908  
TGATACCA -0.0173025408203  
TGATAGAA -0.0222301317259  
TGATAGCA -0.139176309383  
TGATATAA 0.141955285651  
TGATATCA 0.341824260817  
TGATCAAA -0.0842316145346  
TGATCACA 0.241918226767  
TGATCCAA 0.0939957859206  
TGATCCCA 0.0660883338321  
TGATCGAA -0.155519164551  
TGATCGCA 0.203504302825  
TGATCTAA 0.0362448711936  
TGATGAAA 0.207321342496  
TGATGACA -0.068141402612  
TGATGCAA 0.00573714210078  
TGATGCCA -0.18072064918  
TGATGGAA -0.0976599617292  
TGATGGCA -0.155887534281  
TGATGTAA 0.162316883572  
TGATTAAA 0.0639594758915  
TGATTACA 0.369118668884  
TGATTCAA -0.122105030952  
TGATTCCA 0.206579858095  
TGATTGAA -0.0784642152849  
TGATTGCA 0.312669795552  
TGATTTAA 0.0487581245157  
TGCAAAAA 0.0656345385513  
TGCAAAACA -0.0743456955578  
TGCAACAA 0.0214028469202  
TGCAACCA -0.198698925186  
TGCAAGAA -0.0715541036634  
TGCAAGCA -0.137116455298  
TGCAATAA -0.0705731040586  
TGCACAAA 0.0165440923017  
TGCACACA 0.149106406682  
TGCACCAA 0.025340767765  
TGCACCCA -0.0863377138245  
TGCACGAA -0.211707240407  
TGCACGCA -0.0448301929748  
TGCACTAA -0.167912252847  
TGCAGAAA 0.16183263153  
TGCAGACA 0.0815566082495  
TGCAGCAA -0.112038944173

TGCAGCCA -0.216631432701  
TGCAGGAA 0.0220309044327  
TGCAGGCA -0.143474390128  
TGCAGTAA -0.0183861547498  
TGCATAAA -0.108757913667  
TGCATACA 0.132046013591  
TGCATCAA -0.297486272436  
TGCATCCA -0.197184568475  
TGCATGAA 0.0278529180626  
TGCATGCA -0.145696377333  
TGCATTAA -0.0959402348854  
TGCCAAAA 0.0160368751049  
TGCCAACA -0.157688597112  
TGCCACAA 0.0513747921682  
TGCCACCA -0.155315969551  
TGCCAGAA -0.197410540421  
TGCCAGCA -0.341339735537  
TGCCATAA -0.0314129556554  
TGCCCAA 0.077310528152  
TGCCACA 0.0105298135601  
TGCCCAA -0.162476004175  
TGCCCCA -0.353303068641  
TGCCCGAA -0.0641362880611  
TGCCCGCA -0.226810389739  
TGCCCTAA 0.0200800721311  
TGCCGAAA 0.123739441921  
TGCCGACA -0.293747637265  
TGCCGCAA 0.0986190083429  
TGCCGCCA -0.205098623  
TGCCGGAA -0.0516736557406  
TGCCGGCA -0.213939664509  
TGCCGTAA 0.0588784376663  
TGCCTAAA -0.0294613267427  
TGCCTACA -0.0687904644424  
TGCCTCAA -0.00813697026492  
TGCCTCCA -0.14656239575  
TGCCTGAA -0.265816896167  
TGCCTTAA -0.097521734455  
TGCGAAAA 0.189005810218  
TGCGAACA -0.0545298890791  
TGCGACAA 0.0596198228156  
TGCGACCA -0.304945622958  
TGCGAGAA -0.0851122050031  
TGCGAGCA -0.165097537242  
TGCGATAA 0.0525167040319  
TGCGCAA 0.153195915418  
TGCGCACA 0.0602526242648  
TGCGCCAA -0.0909971905853  
TGCGCCCA -0.170785058013  
TGCGCGAA 0.0537517193993  
TGCGCGCA 0.0402578287151  
TGCGCTAA -0.0777154565033  
TGCGGAAA 0.140174609872  
TGCGGACA -0.0736494642521

TGCGGCAA -0.111490278157  
TGCGGCCA -0.39464052936  
TGCGGGAA 0.0738633460581  
TGCGGTAA 0.151660182624  
TGCGTAAA 0.144277886702  
TGCGTACA -0.0325956365919  
TGCGTCAA -0.0355300203785  
TGCGTCCA -0.12599317713  
TGCGTGAA -0.196741755876  
TGCGTTAA -0.153137207873  
TGCTAAAA -0.0306004083451  
TGCTAACA 0.117161667993  
TGCTACAA -0.0155974686686  
TGCTACCA -0.281897219705  
TGCTAGAA -0.0666824814055  
TGCTAGCA -0.153224628394  
TGCTATAA 0.0849678879982  
TGCTCAAA 0.106777576475  
TGCTCACA 0.103290438895  
TGCTCCAA -0.0599701627183  
TGCTCCCA -0.299021999498  
TGCTCGAA -0.282355146473  
TGCTCTAA -0.294184045893  
TGCTGAAA 0.143339196952  
TGCTGACA -0.164271087687  
TGCTGCAA -0.148607284971  
TGCTGCCA -0.290524262097  
TGCTGGAA 0.126720384296  
TGCTGTAA 0.0750341233404  
TGCTTAAA 0.0405618855062  
TGCTTACA -0.0826505693471  
TGCTTCAA -0.142566160232  
TGCTTCCA -0.142819703248  
TGCTTGAA -0.202874406182  
TGCTTTAA -0.0745080767227  
TGGAAAAA -0.192496318147  
TGGAAACA 0.0277066925542  
TGGAACAA -0.00108099822632  
TGGAACCA 0.0112660656879  
TGGAAGAA -0.0531002974984  
TGGAATAA 0.156337452465  
TGGACAAA -0.0789432326691  
TGGACACA 0.0341236553358  
TGGACCAA -0.111400370466  
TGGACCCA -0.1710847189  
TGGACGAA -0.110509071955  
TGGACTAA -0.0704860163288  
TGGAGAAA -0.0757154558316  
TGGAGACA -0.189616912419  
TGGAGCAA -0.169182582419  
TGGAGCCA -0.14169278402  
TGGAGGAA -0.220852045753  
TGGAGTAA -0.141839277087  
TGGATAAA 0.11065086166

TGGATACA 0.169878761779  
TGGATCAA -0.153909768399  
TGGATCCA 0.302232089945  
TGGATGAA -0.0671437851726  
TGGATTAA 0.158153832792  
TGGCAAAA -0.023477588082  
TGGCAACA -0.00167368597768  
TGGCACAA -0.0475197895729  
TGGCACCA -0.340614224405  
TGGCAGAA 0.0558230406715  
TGGCATAA 0.0718693900512  
TGGCCAAA -0.0433406953371  
TGGCCACA -0.295162921983  
TGGCCCAA -0.284579909671  
TGGCCCCA 0.066115343574  
TGGCCGAA 0.0748764625592  
TGGCCTAA -0.0919417822967  
TGGCGAAA 0.0765406596936  
TGGCGACA -0.210079045964  
TGGCGCAA -0.173615013333  
TGGCGCCA -0.0623799325831  
TGGCGGAA -0.116595934778  
TGGCGTAA 0.182850740495  
TGGCTAAA -0.123642980283  
TGGCTACA -0.160823937817  
TGGCTCAA -0.190510057531  
TGGCTGAA -0.033732194647  
TGGCTTAA -0.123542550163  
TGGGAAAA 0.142598521386  
TGGGAACA -0.137385523618  
TGGGACAA 0.110818140136  
TGGGACCA -0.220599547231  
TGGGAGAA -0.0299313839826  
TGGGATAA 0.171941885938  
TGGGCAAA 0.0715307937296  
TGGGCACA -0.201441508498  
TGGGCCAA 0.0411750107662  
TGGGCCCA -0.291627742919  
TGGGCGAA -0.0536600025917  
TGGGCTAA -0.0539426143953  
TGGGGAAA 0.128253964315  
TGGGGACA -0.385513569497  
TGGGGCAA -0.055187842602  
TGGGGGAA 0.0135543588853  
TGGGGTAA 0.112110683708  
TGGGTAAA 0.0199112428195  
TGGGTACA -0.135647998809  
TGGGTCAA -0.05731600729  
TGGGTGAA -0.102403677036  
TGGGTTAA -0.0948054153251  
TGGTAAAA 0.0392720544236  
TGGTAACA -0.0819401359419  
TGGTACAA 0.196511938936  
TGGTACCA -0.15501180919

TGGTAGAA 0.122049152208  
TGGTATAA 0.119497108966  
TGGTCAAA 0.150405226163  
TGGTCACA -0.239265840556  
TGGTCCAA 0.111650217711  
TGGTCGAA -0.150617846699  
TGGTCTAA -0.00901121671588  
TGGTGAAA 0.0322016231107  
TGGTGACA -0.37356018721  
TGGTGCAA 0.044077136997  
TGGTGGAA -0.0653482040539  
TGGTGTA 0.142863294964  
TGGTTAAA 0.0475544414938  
TGGTTACA -0.158621812041  
TGGTTCAA 0.0683838108081  
TGGTTGAA -0.146860336989  
TGGTTTAA 0.219432931554  
TGTA AAAA 0.181932621327  
TGTA AACA 0.0714231596713  
TGTA ACAA 0.173666183776  
TGTA AGAA -0.0367502901396  
TGTA ATAA 0.0930979613585  
TGTA CAAA 0.043218761633  
TGTA CACA 0.00883376070665  
TGTA CCAA 0.0630010175465  
TGTA CGAA 0.051810763932  
TGTA CTA -0.0332913580021  
TGTA GAAA 0.232759136661  
TGTA GACA -0.177585346555  
TGTA GCAA 0.0243461822004  
TGTA GGAA 0.0294584790114  
TGTA GTAA 0.149588715777  
TGTA TAAA 0.262075283023  
TGTA TACA 0.0429017934661  
TGTA TCAA 0.0674389866354  
TGTA TGAA -0.0177609249432  
TGTA TTAA 0.155601702153  
TGTA CAAA 0.0678307318163  
TGTA AACA 0.00379580682611  
TGTA CACA 0.258047303502  
TGTA CAGAA 0.167940667941  
TGTA CATA 0.0969819562681  
TGTA CAAA 0.133053163356  
TGTA CACA -0.101324950711  
TGTA CCAA 0.172894754129  
TGTA CCGAA -0.202709329768  
TGTA CCTAA -0.0429954088597  
TGTA CGAAA 0.180593855609  
TGTA CGACA -0.403848299978  
TGTA CGCAA 0.210685892504  
TGTA CGGAA 0.0343455309988  
TGTA CGTAA 0.176284460924  
TGTA CTA 0.0870526173556  
TGTA CCAA 0.0057422100246

TGTCTGAA -0.192770403451  
TGTCTTAA 0.177172032729  
TGTGAAAA 0.0945052298125  
TGTGAACA -0.00202671960955  
TGTGACAA 0.187218528061  
TGTGAGAA 0.086744815807  
TGTGATAA 0.155730110276  
TGTGCAAA -0.0275881942549  
TGTGCACA 0.0292985923335  
TGTGCCAA -0.0630240862528  
TGTGCGAA 0.187536769268  
TGTGCTAA -0.165642510695  
TGTGGAAA 0.196233423506  
TGTGGCAA 0.100727449212  
TGTGGGAA 0.0728443902688  
TGTGGTAA 0.043990271263  
TGTGTAAA 0.145768340839  
TGTGTCAA 0.0872791106764  
TGTGTGAA 0.0837931595507  
TGTGTTAA 0.250274081589  
TGTTAAAA 0.0695061452637  
TGTTAACA 0.268714908255  
TGTTACAA 0.182465327897  
TGTTAGAA -0.0283768617102  
TGTTATAA 0.211100908071  
TGTTCAAA 0.034801427706  
TGTTCCAA 0.0265446742042  
TGTTCGAA -0.0117439439688  
TGTTCTAA 0.0767829901535  
TGTTGAAA 0.213285110545  
TGTTGCAA 0.0492069516726  
TGTTGGAA 0.059010801435  
TGTTGTAA 0.222965389632  
TGTTTAAA 0.0870864141661  
TGTTTCAA -0.0696888227103  
TGTTTGAA 0.0226939970717  
TGTTTTAA 0.0289446216506  
TTAAAAAA 0.117620052116  
TTAAACAA 0.112131121216  
TTAAAGAA 0.0806357321509  
TTAAATAA 0.147610243939  
TTAACAAA 0.24846390225  
TTAACCAA 0.1367055761  
TTAACGAA 0.0772230705826  
TTAACTAA 0.063977328096  
TTAAGAAA 0.228276485852  
TTAAGCAA 0.159157828661  
TTAAGGAA 0.204779159325  
TTAAGTAA 0.1800878013  
TTAATAAA 0.228836274291  
TTAATCAA 0.093659775478  
TTAATGAA 0.244507784501  
TTAATTAA 0.130931709374  
TTACAAAA 0.310266928461

TTACACAA 0.075428233287  
TTACAGAA 0.210534805807  
TTACATAA 0.102594329867  
TTACCAAA 0.174538513755  
TTACCCAA -0.0447238381641  
TTACCGAA 0.0796062859937  
TTACCTAA 0.15289811172  
TTACGAAA 0.149414976314  
TTACGCAA 0.210807225959  
TTACGGAA 0.196377451589  
TTACGTAA 0.275076557543  
TTACTAAA 0.112598264272  
TTACTCAA 0.148036847722  
TTACTGAA 0.106081618651  
TTAGAAAA 0.151337287701  
TTAGACAA 0.0224396546061  
TTAGAGAA 0.0230984064614  
TTAGATAA 0.201494883313  
TTAGCAAA 0.174903469267  
TTAGCCAA 0.059545771667  
TTAGCGAA 0.139355269363  
TTAGCTAA -0.146130142744  
TTAGGAAA 0.116049283592  
TTAGGCAA 0.233755794362  
TTAGGGAA 0.0729834517713  
TTAGTAAA 0.121158348431  
TTAGTCAA 0.10411950429  
TTAGTGAA 0.0186528762144  
TTATAAAA 0.26019795187  
TTATACAA 0.198427041744  
TTATAGAA 0.169543002708  
TTATATAA 0.179387208895  
TTATCAAA 0.158253294617  
TTATCCAA 0.243975380339  
TTATCGAA 0.12736617424  
TTATGAAA 0.213948107888  
TTATGCAA 0.208942353029  
TTATGGAA -0.0076343561192  
TTATTAAA 0.237927140978  
TTATTCAA 0.093750775569  
TTATTGAA 0.0521616314971  
TTCAAAAA 0.183156986187  
TTCAACAA 0.124002394108  
TTCAAGAA -0.0216521987831  
TTCACAAA 0.0985401779523  
TTCACCAA 0.0887768880973  
TTCACGAA 0.0436410638918  
TTCAGAAA 0.0788488212731  
TTCAGCAA 0.151836409412  
TTCAGGAA 0.0930576584179  
TTCATAAA 0.171203811698  
TTCATCAA 0.12736290009  
TTCATGAA 0.144798928279  
TTCAAAA 0.126996142148



TTCCACAA 0.140357843016  
TTCCAGAA -0.0838151006129  
TTCCAAA 0.253177419844  
TTCCCAA 0.0590238906691  
TTCCGAA 0.214228155588  
TTCCGAAA 0.167218354889  
TTCCGCAA 0.0642915642916  
TTCCGGAA 0.121449656438  
TTCTAAA 0.130154084217  
TTCTCAA 0.110541671148  
TTGAAAA 0.0775041422451  
TTGACAA 0.199117850633  
TTGAGAA 0.0129307262195  
TTGCAA 0.15094846913  
TTGCCAA 0.0100499948985  
TTGCGAA 0.101503863021  
TTGGAAA 0.13103289709  
TTGGCAA 0.0913666124099  
TTGTAAA 0.145176857298  
TTGTCAA 0.156149961536  
TTCTAAAA 0.076126070232  
TTCTACAA 0.125517689394  
TTCTAGAA 0.0702027844619  
TTCTCAA 0.19728406092  
TTCTCAA -0.0913719846391  
TTCTGAAA -0.0743024708208  
TTCTGCAA 0.0973428543068  
TTCTTAAA 0.0228600833558  
TTCTTCAA 0.257663700795  
TTGAAAA 0.323076520046  
TTGAACAA -0.0655352755788  
TTGACAAA 0.282260371586  
TTGACCAA 0.0860353422918  
TTGAGAAA 0.216479201185  
TTGAGCAA 0.17479836208  
TTGATAAA 0.216356576133  
TTGATCAA -0.107462353321  
TTGAAAA 0.17233292801  
TTGCACAA -0.0441502108169  
TTGCCAAA 0.164336512821  
TTGCCCAA -0.0606242199076  
TTGCGAAA 0.201097792007  
TTGCGCAA 0.230208738172  
TTGCTAAA 0.128063619045  
TTGAAAA 0.116032009971  
TTGACAA 0.0397531440917  
TTGGCAA 0.13592330095  
TTGGCAA -0.0303728695825  
TTGGGAAA 0.130734039825  
TTGGTAAA 0.123866290533  
TTGTAAAA 0.184374794713  
TTGTACAA 0.027689579044  
TTGTCAA 0.149610592469  
TTGTGAAA 0.0803829113231

TTGTTAAA 0.153902469289  
TTTAAAAA 0.216879413849  
TTTACAAA 0.188984291635  
TTTAGAAA 0.0293695899757  
TTTATAAA 0.212044410266  
TTTCAAAA 0.223806451079  
TTTCCAAA 0.147207725378  
TTTCGAAA 0.115263548135  
TTTGAAAA 0.319989343299  
TTTGCAAA 0.242287051508  
TTTTAAAA 0.208521798572
